# Supplementary material
Source: PubMed Central journal article supplement (PMC2938093)

# Peptide Identification from Mixture Tandem Mass Spectra

Jian Wang<sup>1</sup>, Josué Pérez-Santiago<sup>1</sup>, Jonathan E. Katz<sup>2</sup>, Parag Mallick<sup>2</sup>, Nuno Bandeira<sup>3</sup>

<sup>1</sup>Bioinformatics Program, University of California, San Diego, USA

<sup>2</sup>Dept. of Chemistry and Biochemistry, University of California, Los Angeles, USA

<sup>3</sup>Center for Computational Mass Spectrometry, University of California, San Diego, USA

## Supplementary Materials

### Introduction

To illustrate the utility of our method in a typical scenario, we further tested M-SPLIT on a larger experimental *Yeast dataset*, generously made publicly available in Tranche/ProteomeCommons by researchers at the University of Vanderbilt. In brief, a tryptic digest of a *Saccharomyces cerevisiae* was analyzed on an LTQ Orbitrap XL mass spectrometer (Thermo Fisher Scientific) and MS/MS spectra were acquired using a data-dependent scanning mode in which one full MS scan ( $m/z$  3002000) was acquired on the Orbitrap at a resolution of 60 000, followed by 8 MS/MS scans collected on the LTQ. M-SPLIT was ran with default parameters against the Yeast spectral library from NIST (*ver.5/4/2009*); a 3 Da parent mass filter was used to pre-filter the library before the search.

This documents contain annotated mixture spectra identified by M-SPLIT. Each page contain three spectra. The middle spectrum is the identified mixture spectrum from yeast dataset. The top and bottom spectra are two spectra from NIST spectral library that best matched to the mixture spectra. In beginning of each page the name/scan number, the precurosr  $m/z$  of the mixture spectrum, the cosine similarity between the mixture spectrum and the two spectra from the library and the estimated  $\alpha$  is also shown.

yeast0\_Scan\_Number\_6486 Precursor m/z: 710.880 cosine: 0.793  $\alpha$ : 0.998

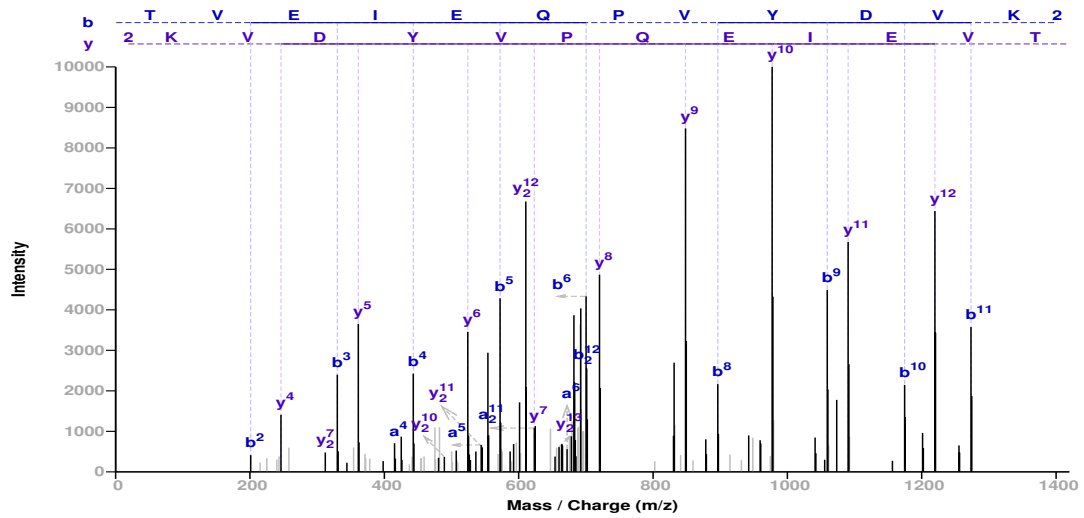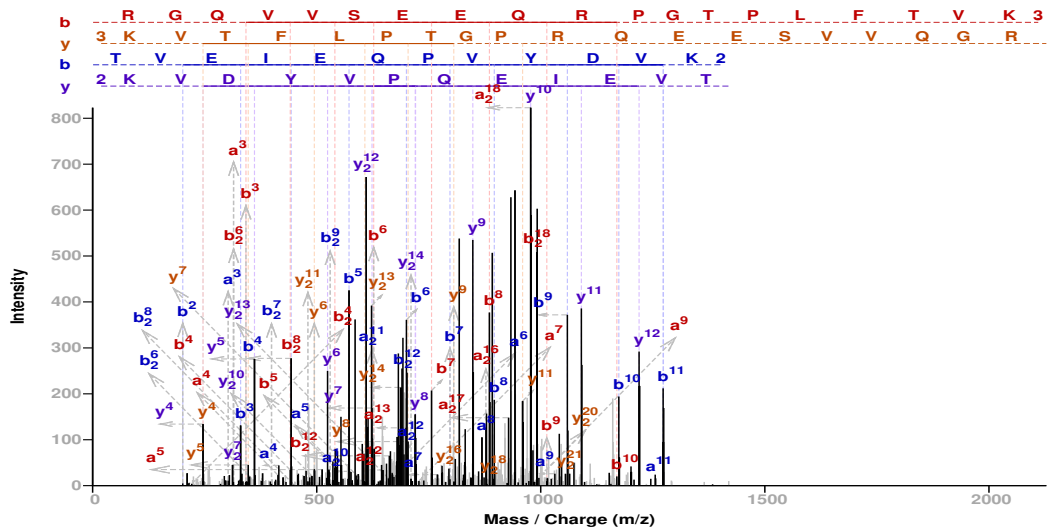

yeast0\_Scan\_Number\_8066 Precursor m/z: 669.882 cosine: 0.756  $\alpha$ : 0.988

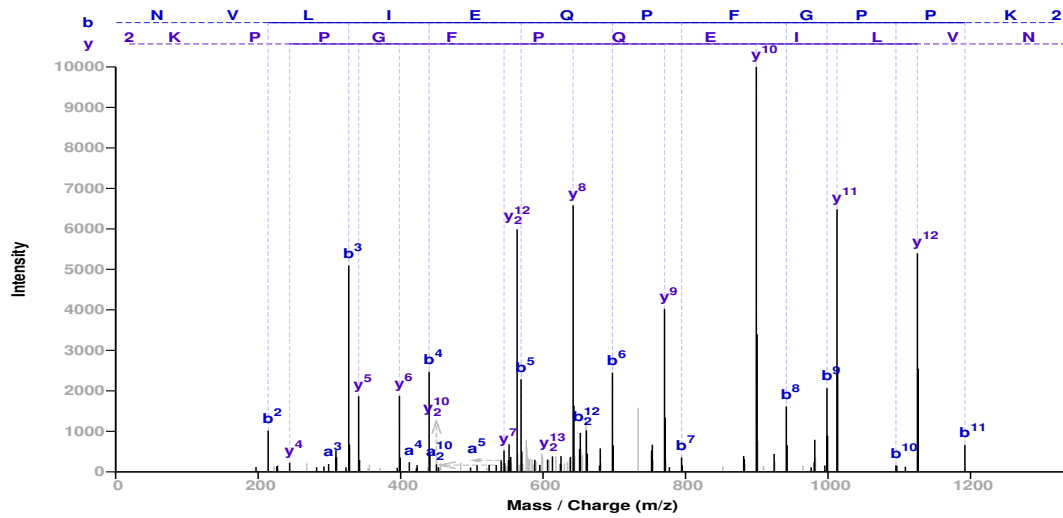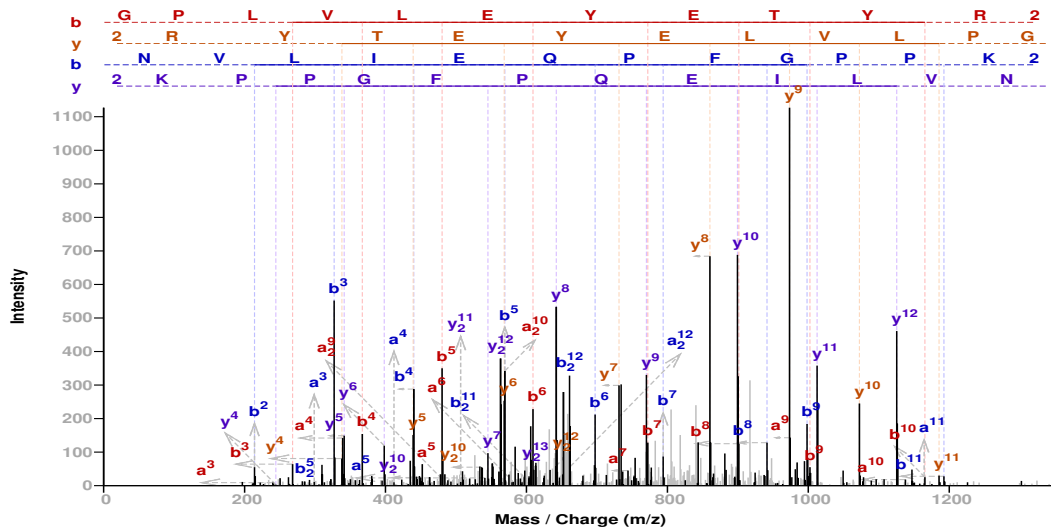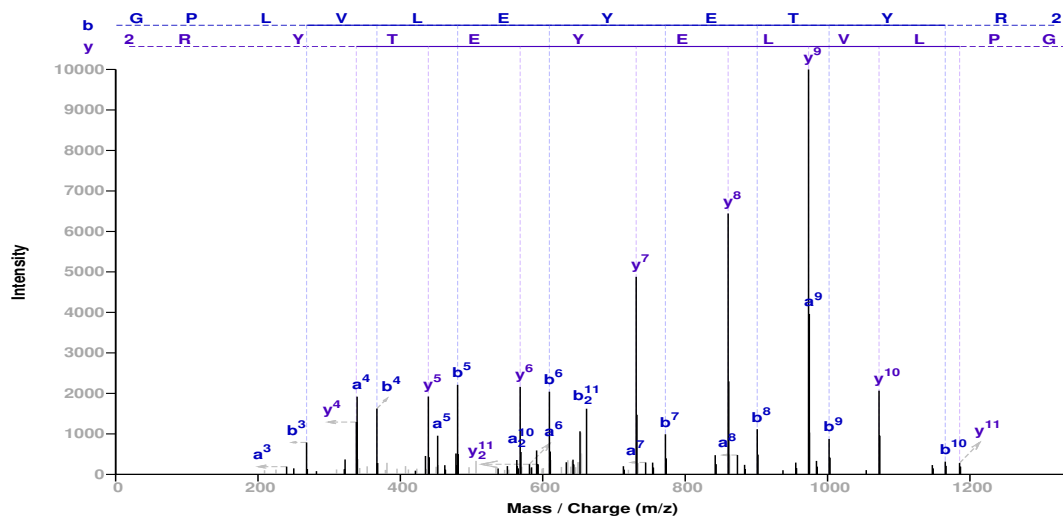

yeast0\_Scan\_Number\_9239 Precursor m/z: 709.379 cosine: 0.760  $\alpha$ : 0.979

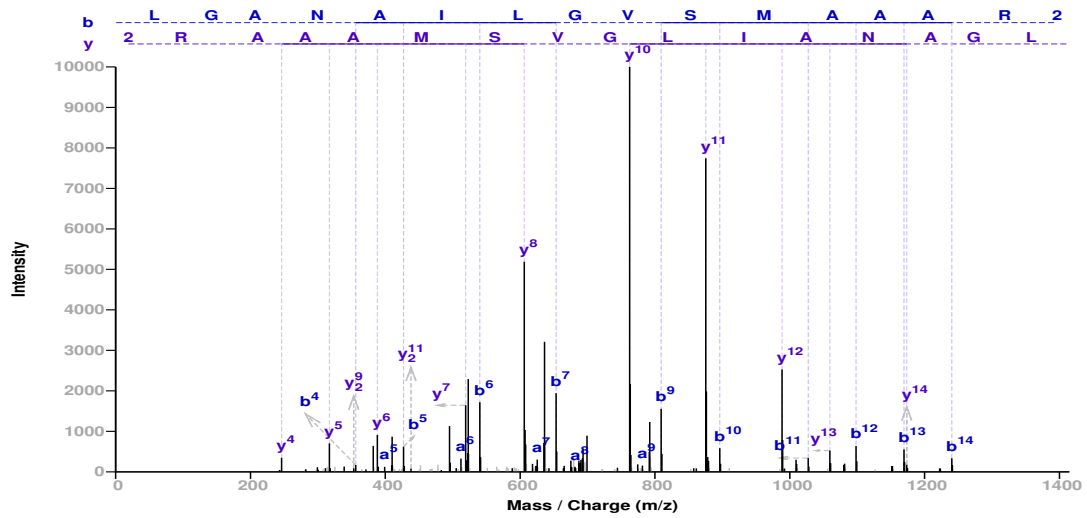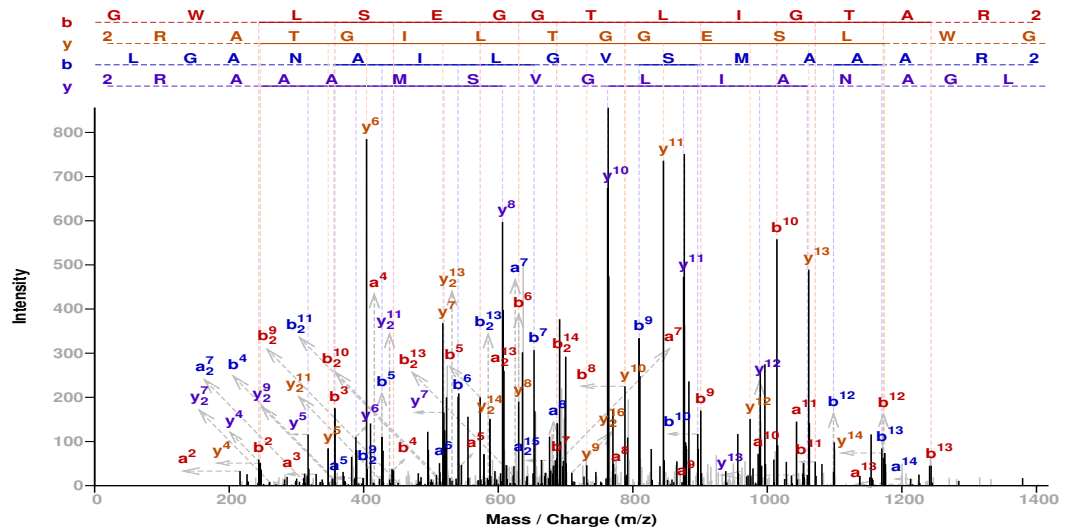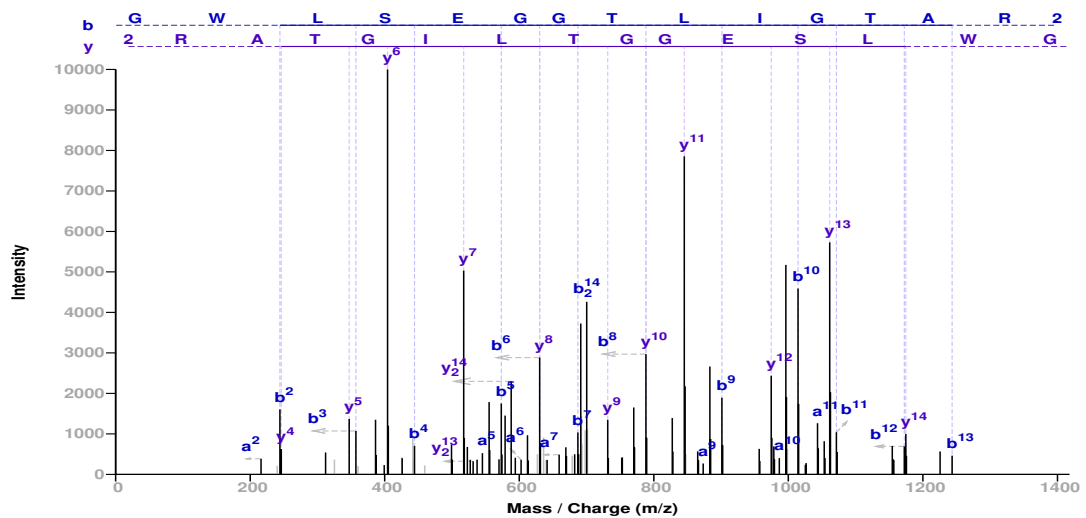

yeast0\_Scan\_Number\_4628 Precursor m/z: 426.887 cosine: 0.830  $\alpha$ : 0.950

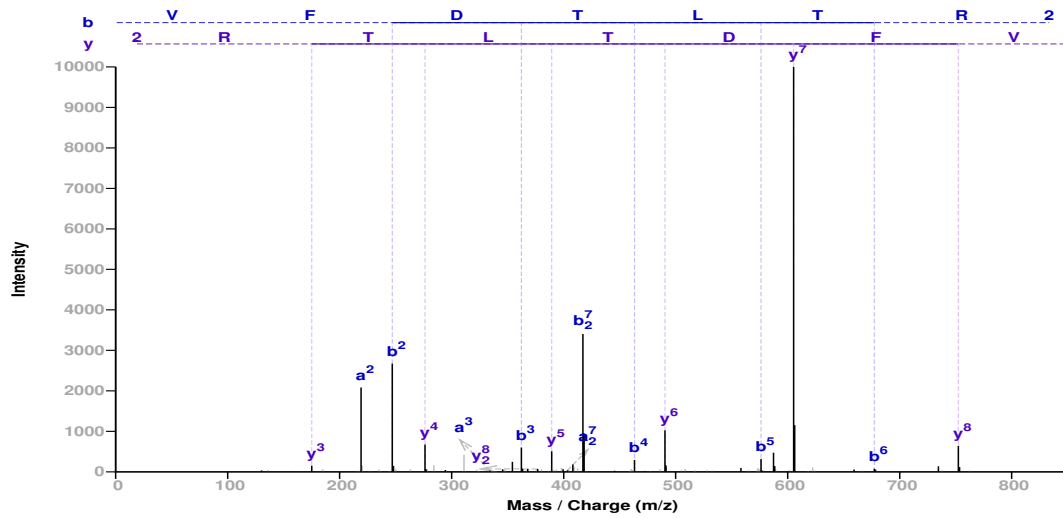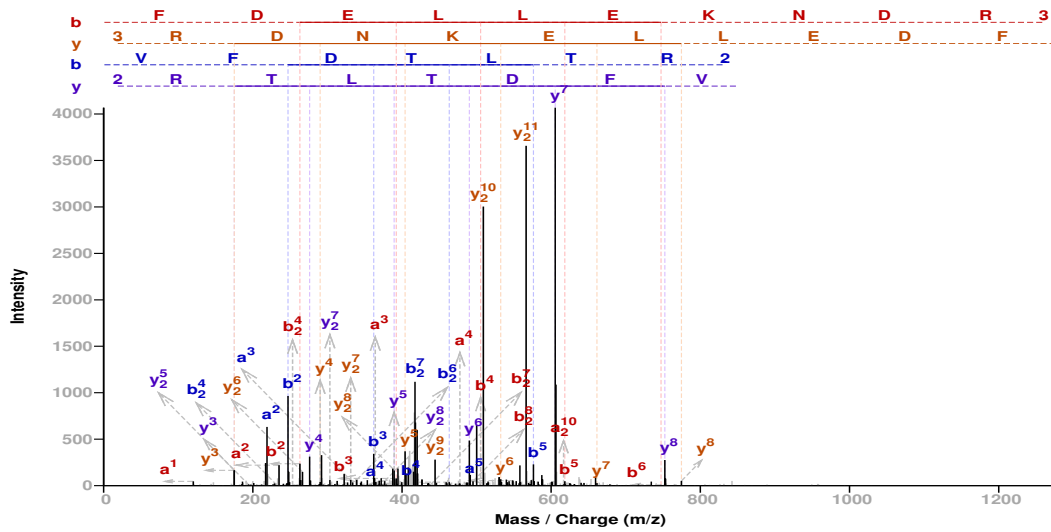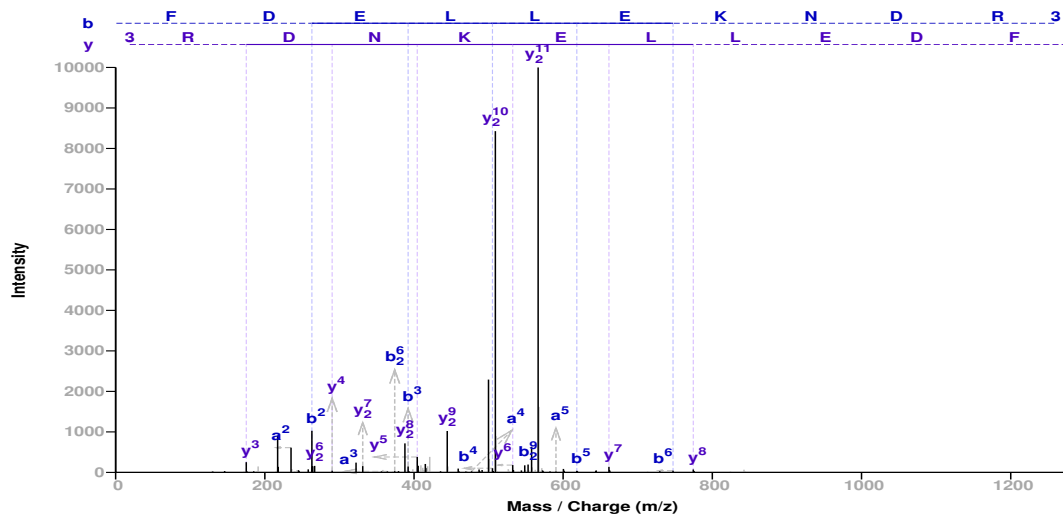

yeast0.Scan\_Number\_7493 Precursor m/z: 449.275 cosine: 0.910  $\alpha$ : 0.942

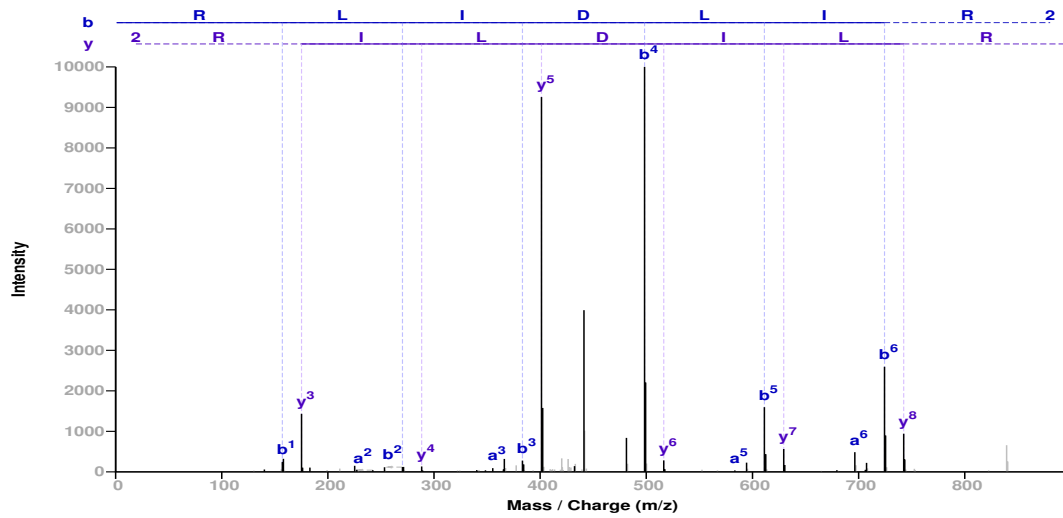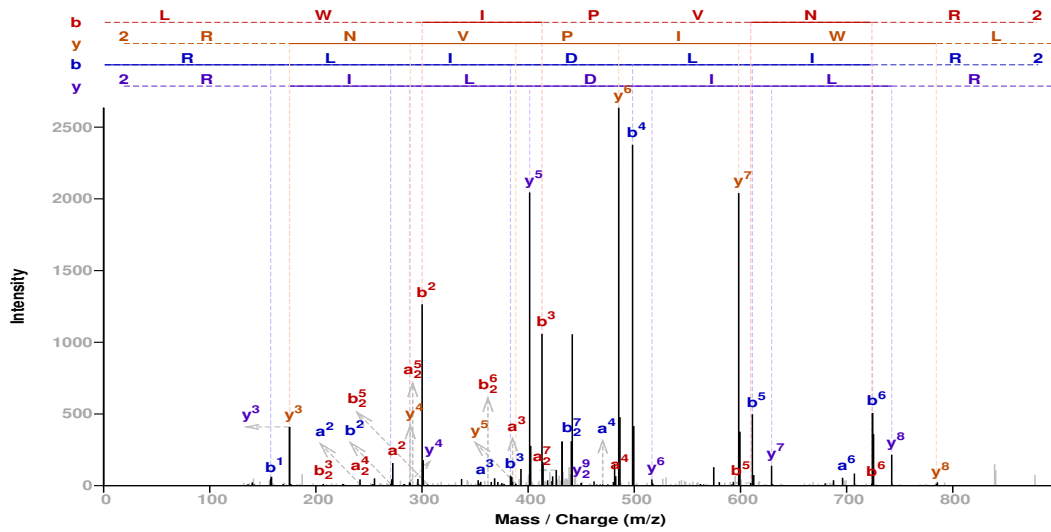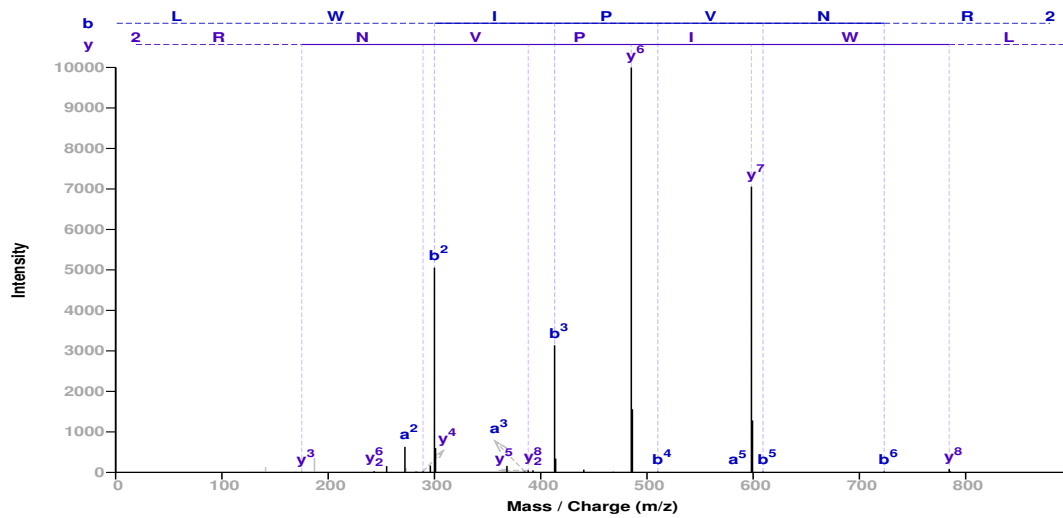

yeast0\_Scan\_Number\_7852 Precursor m/z: 760.394 cosine: 0.789  $\alpha$ : 0.935

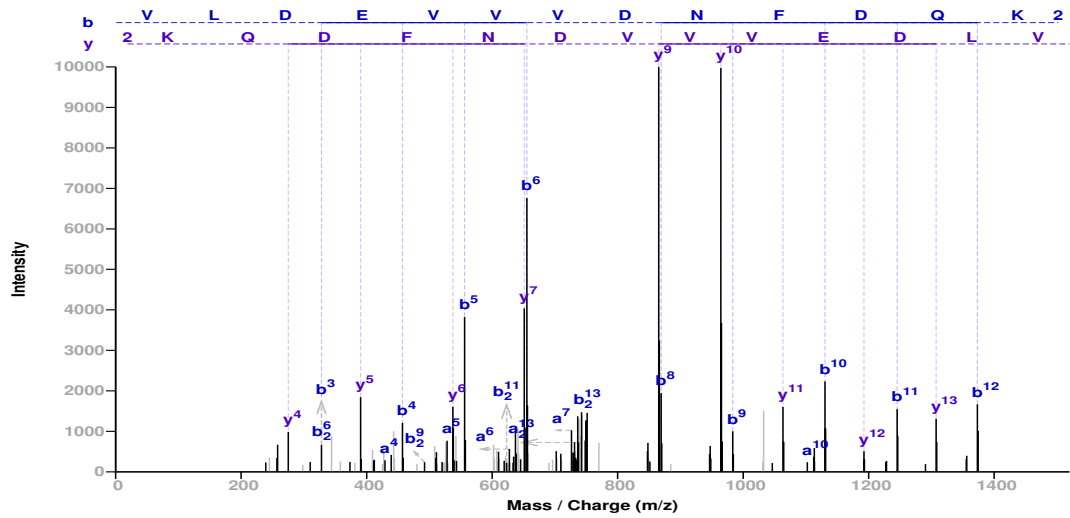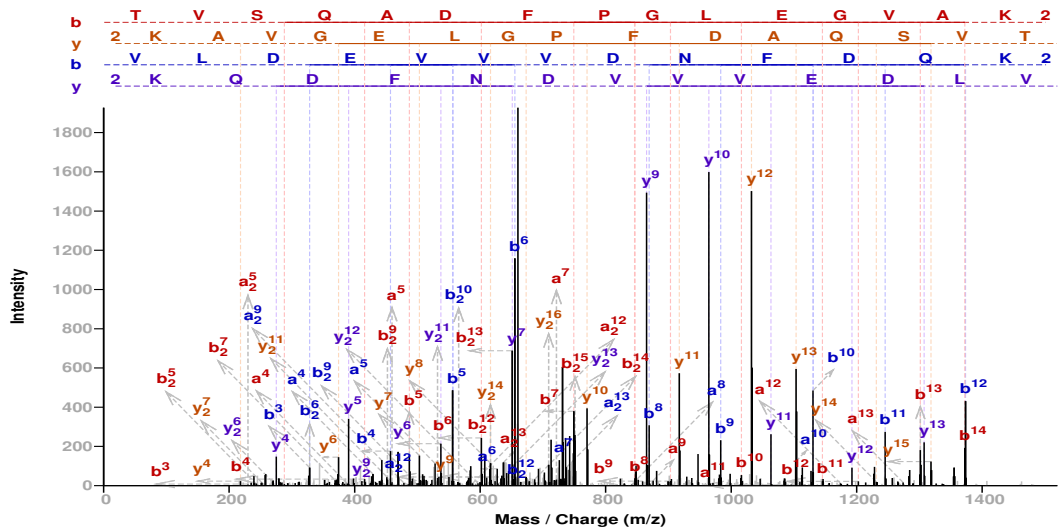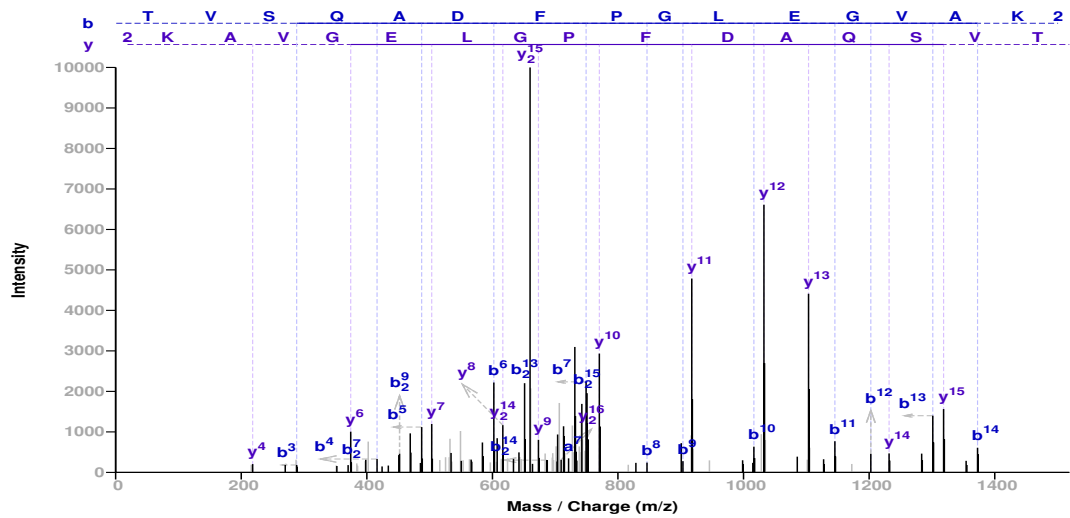





yeast0\_Scan\_Number\_5613 Precursor m/z: 579.826 cosine: 0.806  $\alpha$ : 0.875

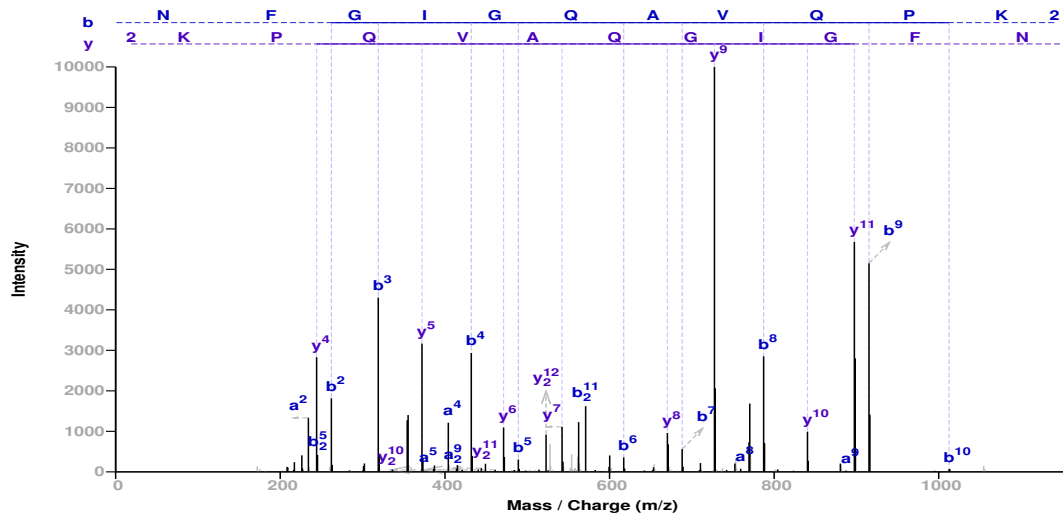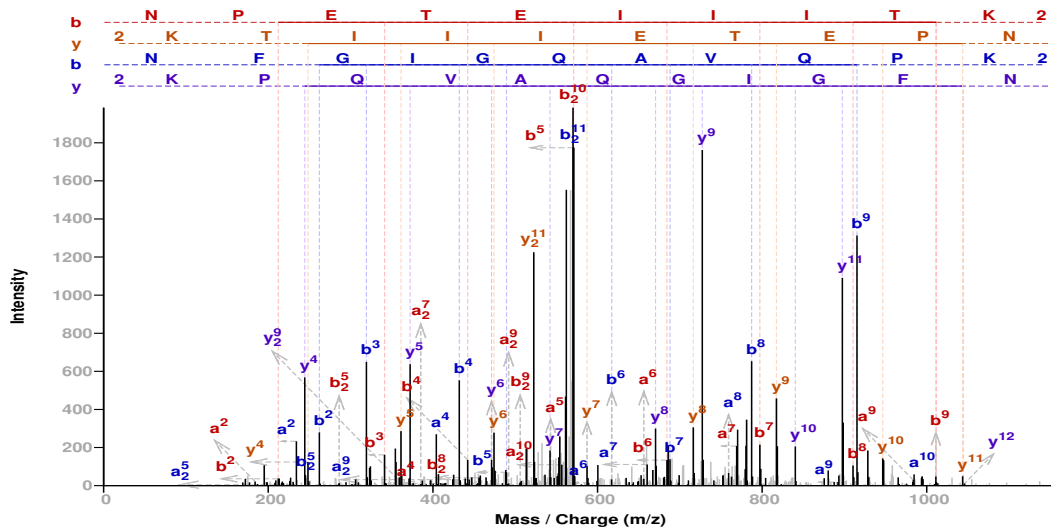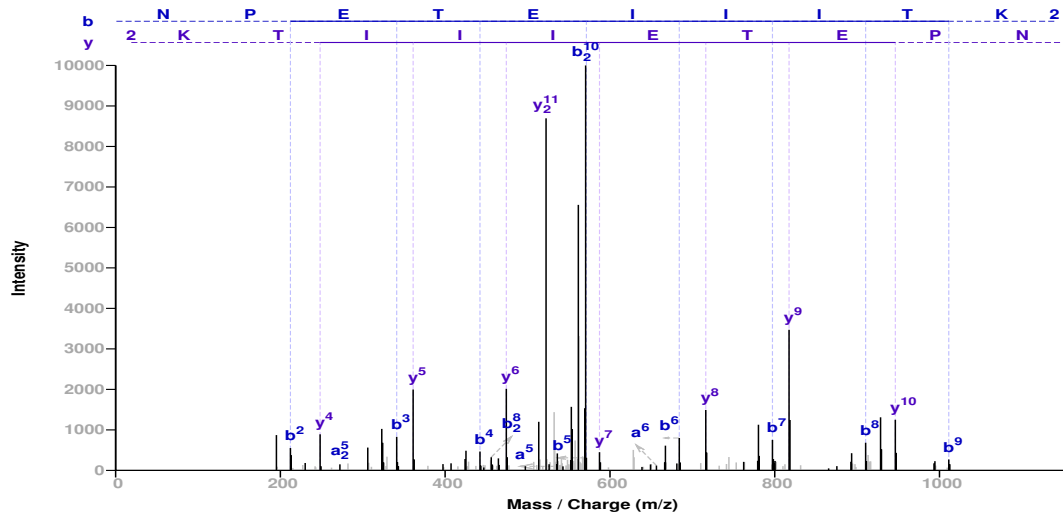

yeast0\_Scan\_Number\_3959 Precursor m/z: 388.705 cosine: 0.779  $\alpha$ : 0.873

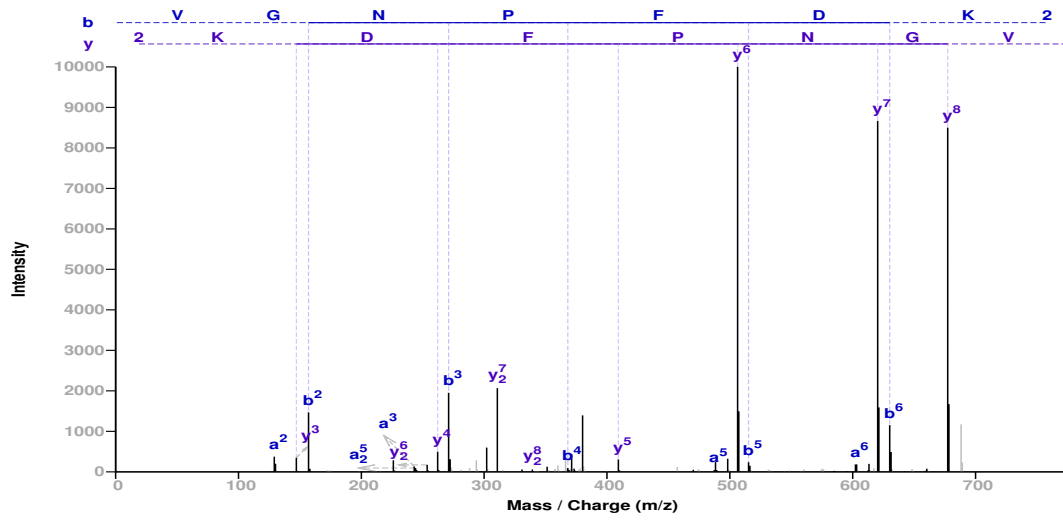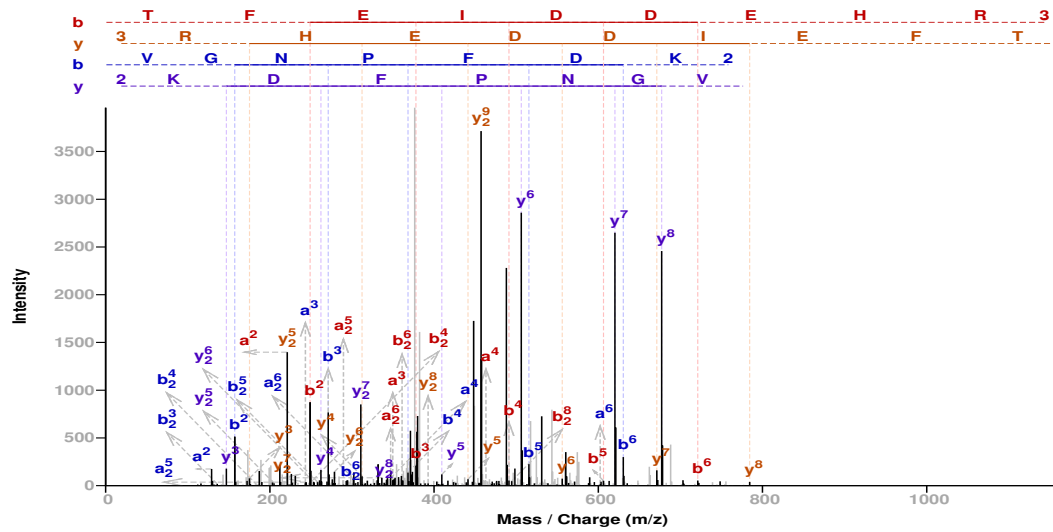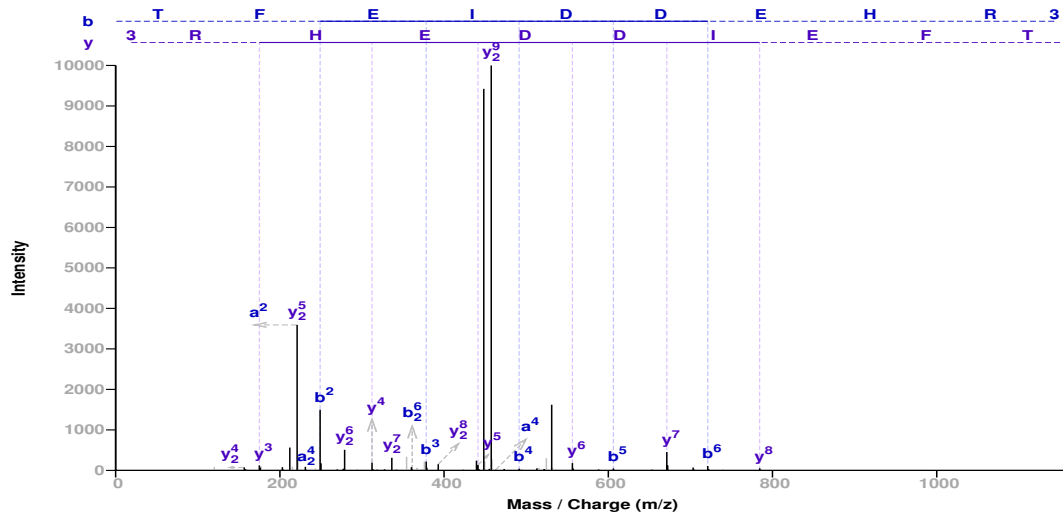

yeast0\_Scan\_Number\_2135 Precursor m/z: 622.362 cosine: 0.821  $\alpha$ : 0.869

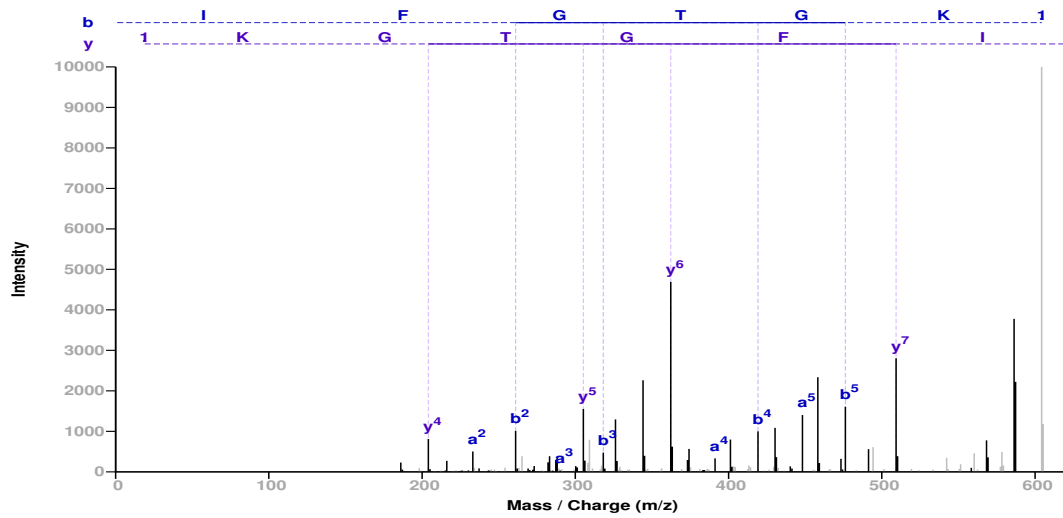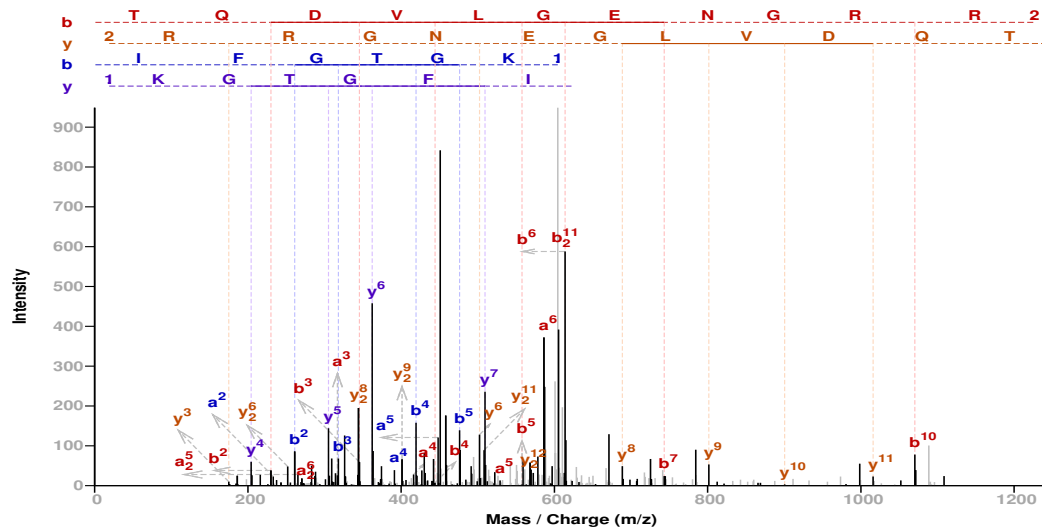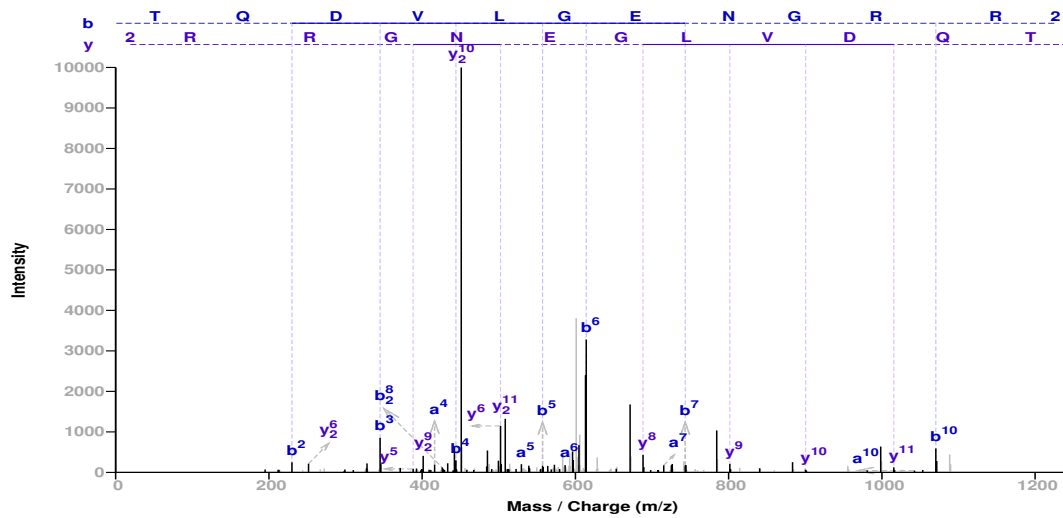

yeast0.Scan\_Number\_4706 Precursor m/z: 408.237 cosine: 0.774  $\alpha$ : 0.859

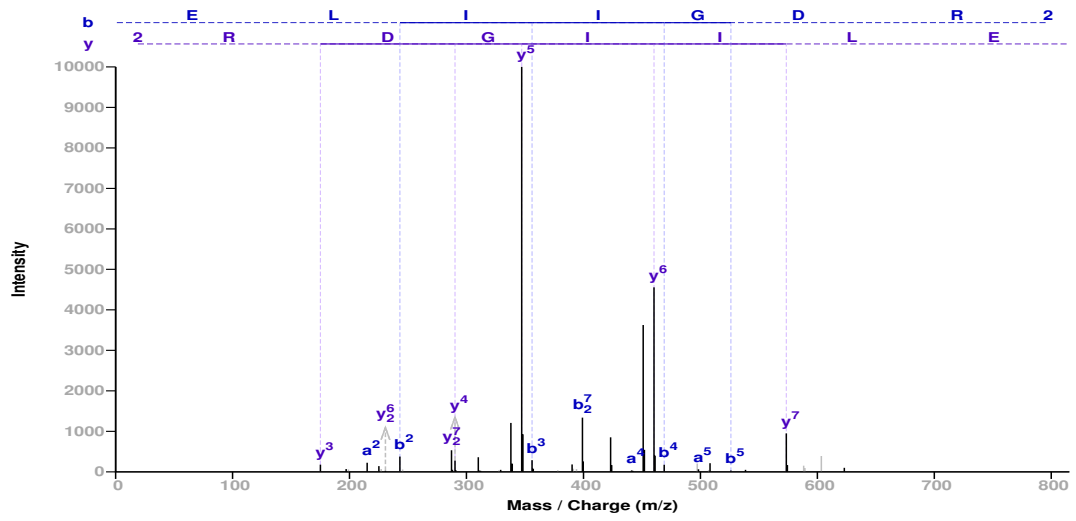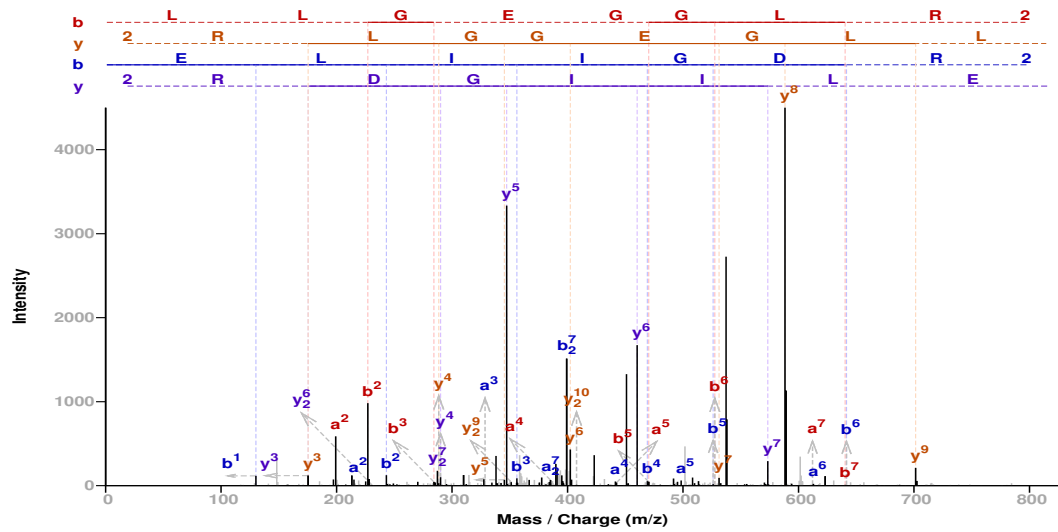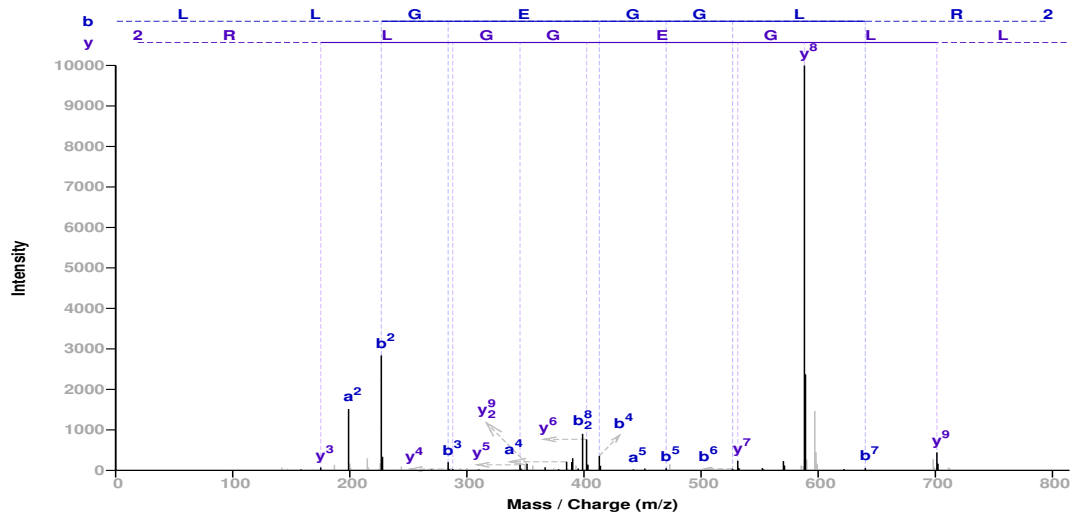

yeast0.Scan\_Number.1146 Precursor m/z: 474.721 cosine: 0.745  $\alpha$ : 0.855

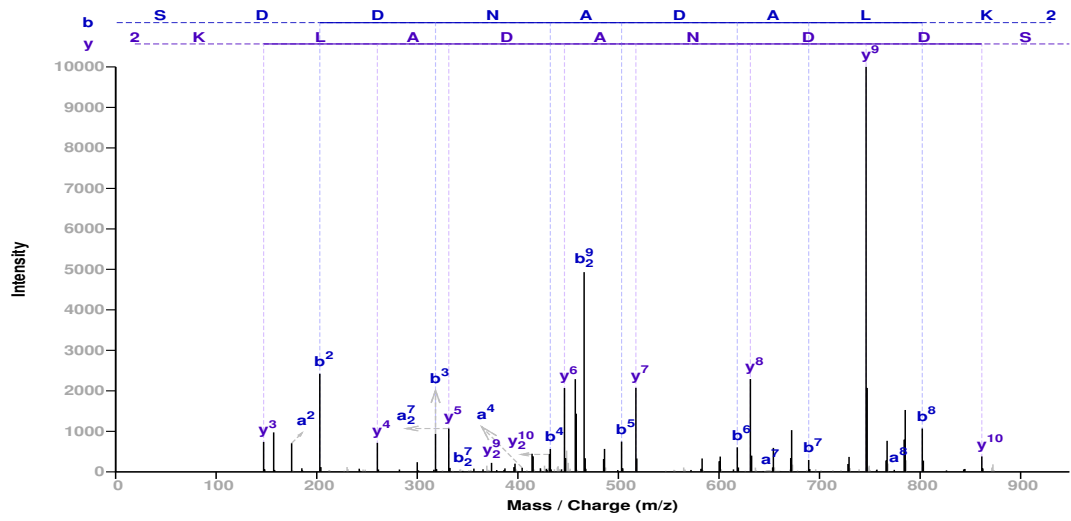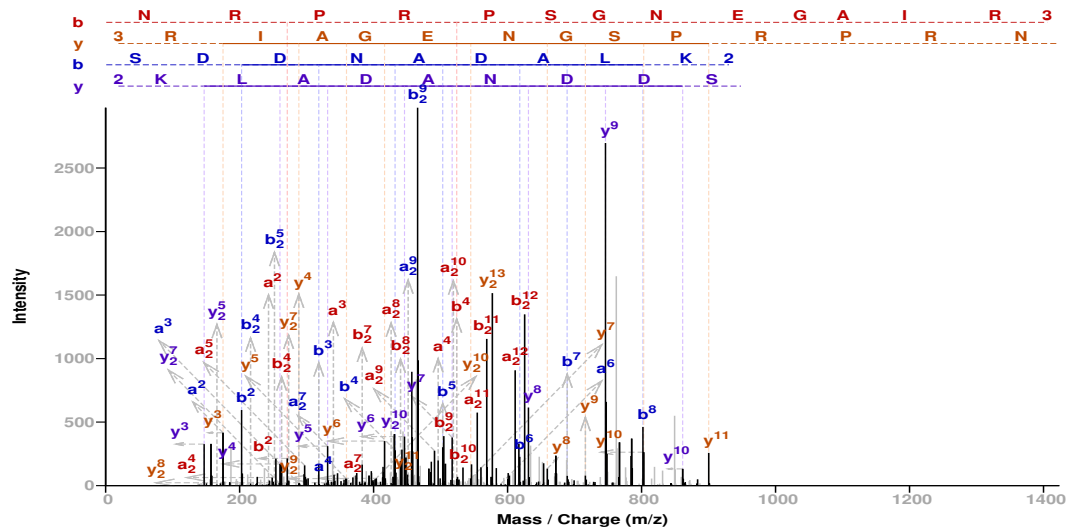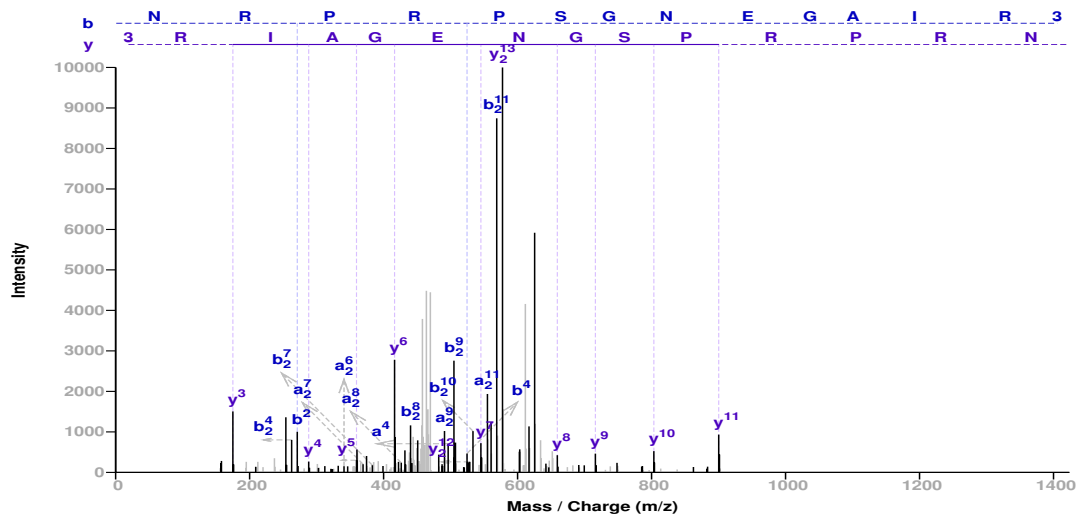

yeast0\_Scan\_Number\_1015 Precursor m/z: 430.252 cosine: 0.799  $\alpha$ : 0.852

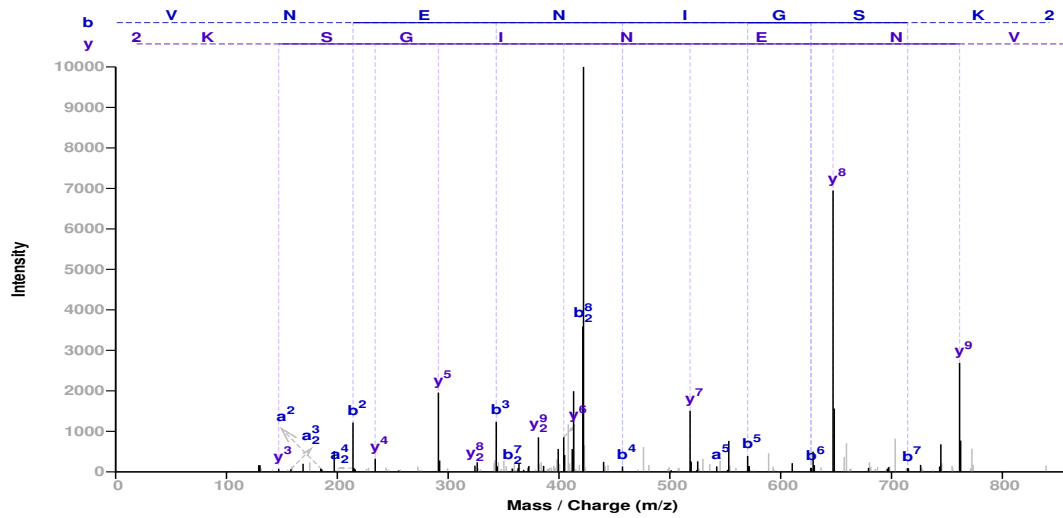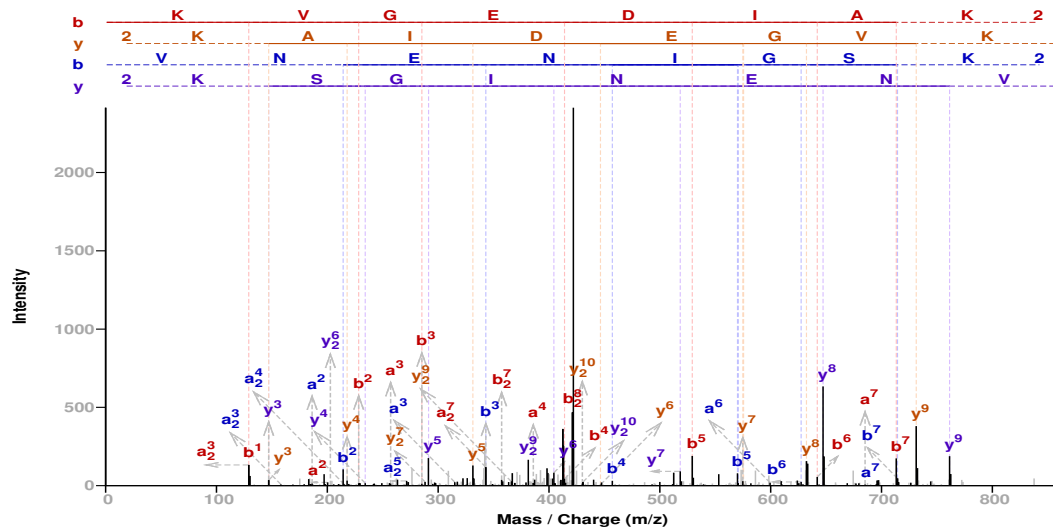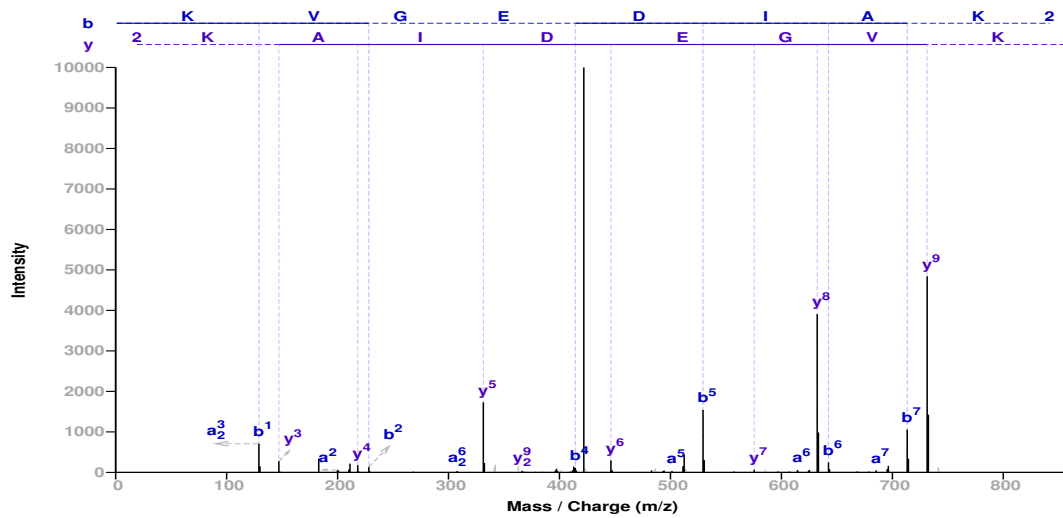

yeast0.Scan\_Number.1936 Precursor m/z: 438.755 cosine: 0.802  $\alpha$ : 0.849

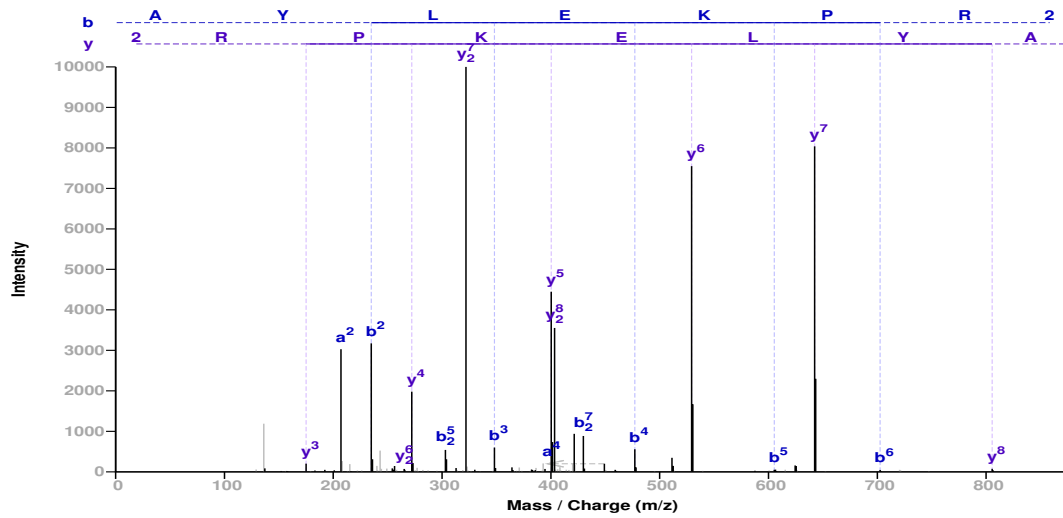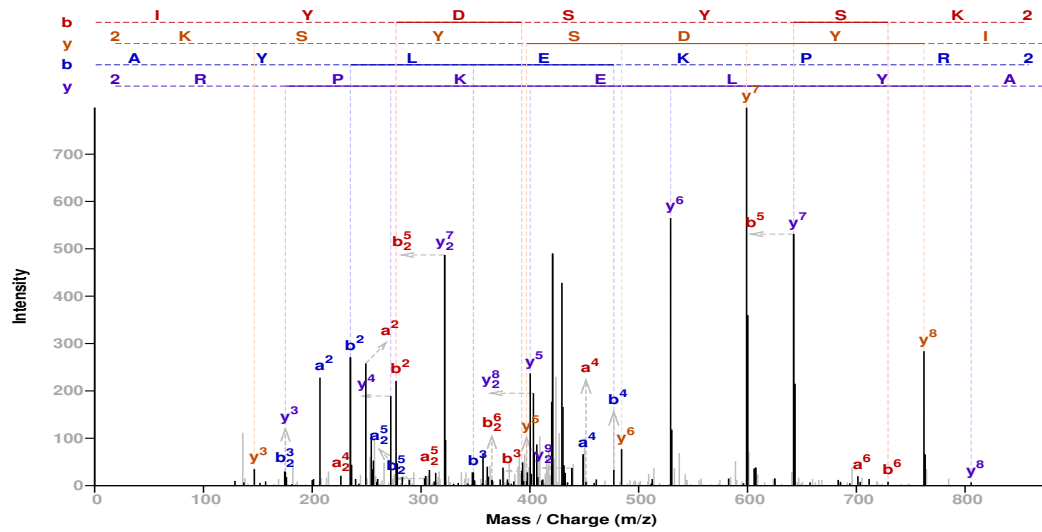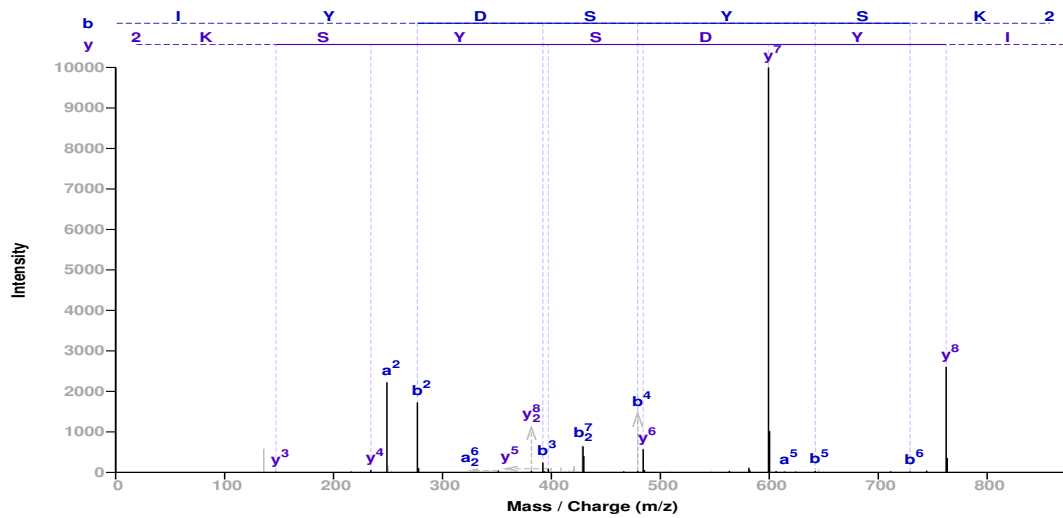



yeast0\_Scan\_Number\_4128 Precursor m/z: 389.714 cosine: 0.773  $\alpha$ : 0.846

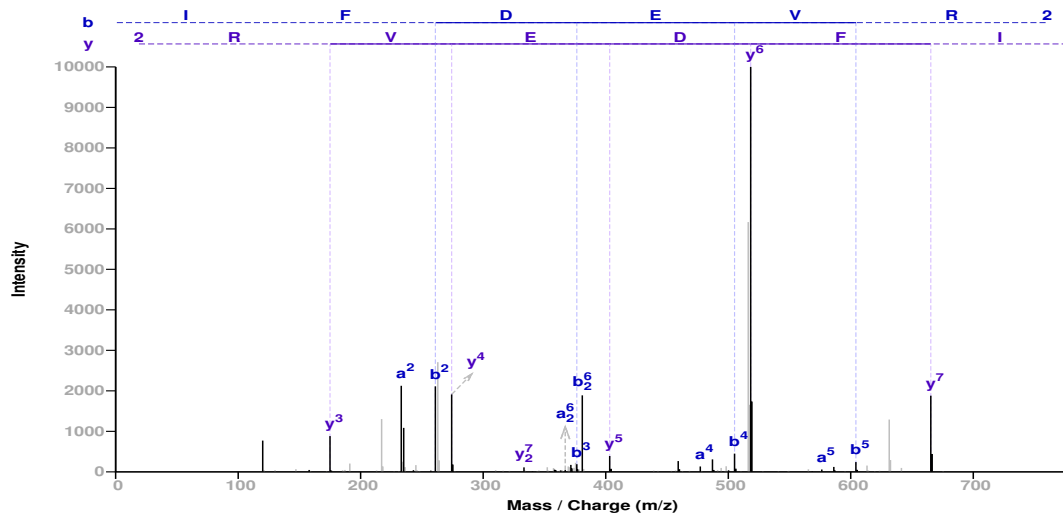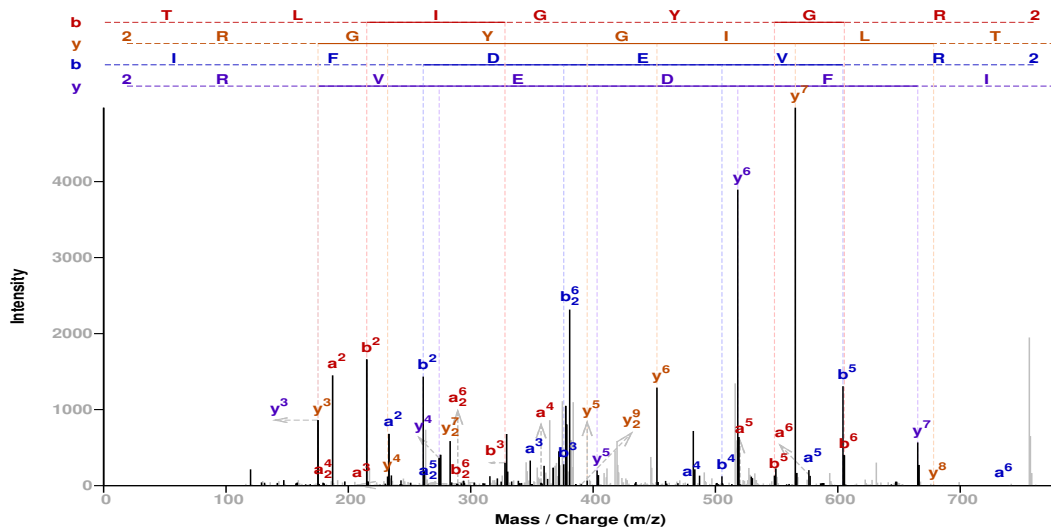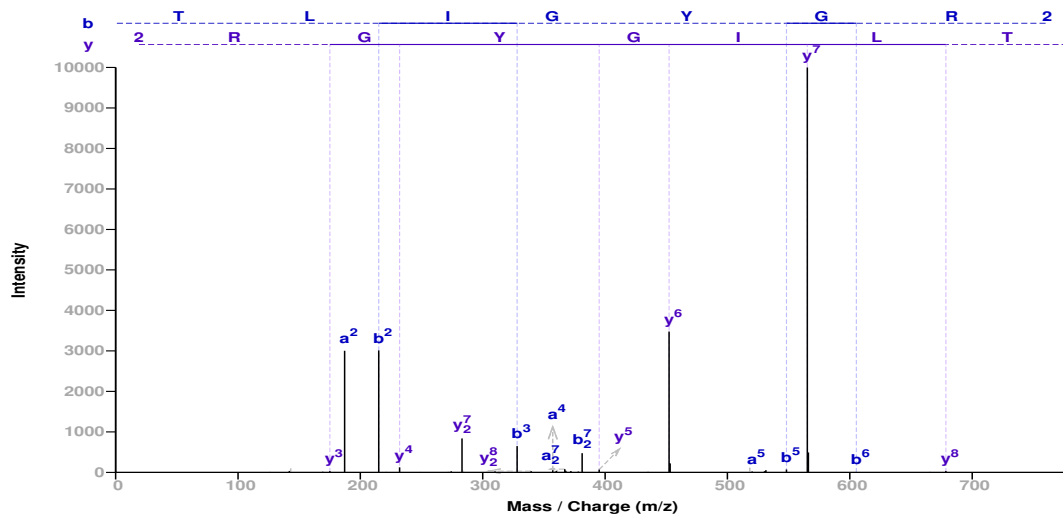

yeast0\_Scan\_Number\_7679 Precursor m/z: 555.284 cosine: 0.780  $\alpha$ : 0.845

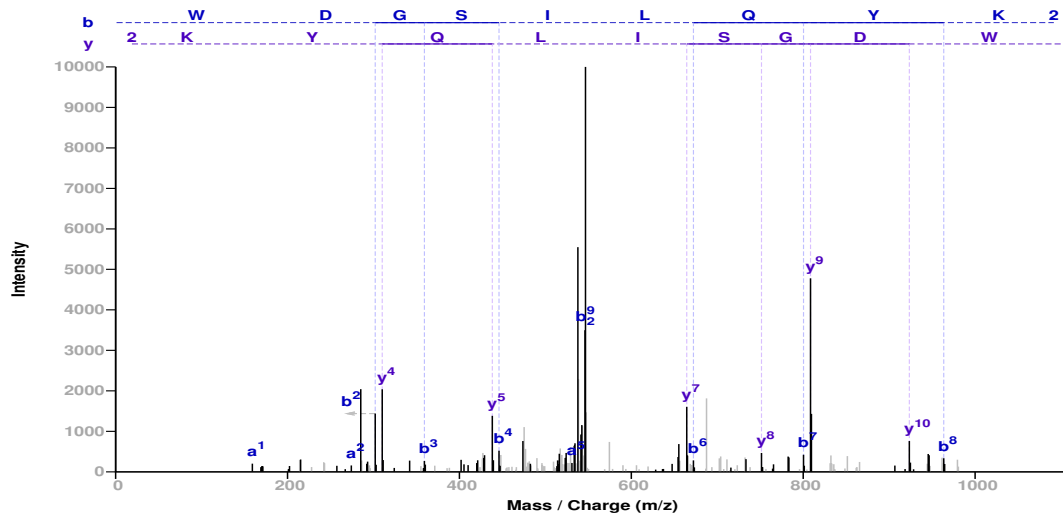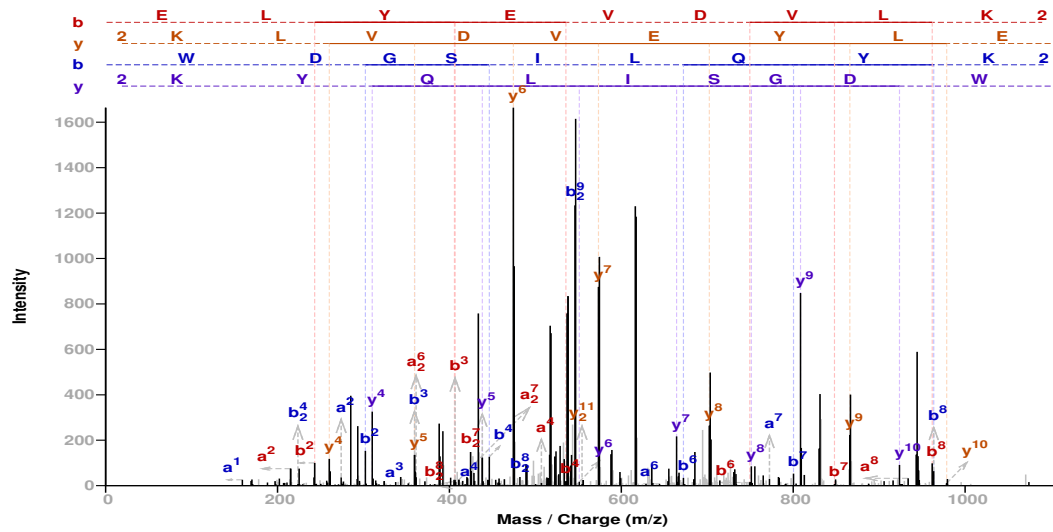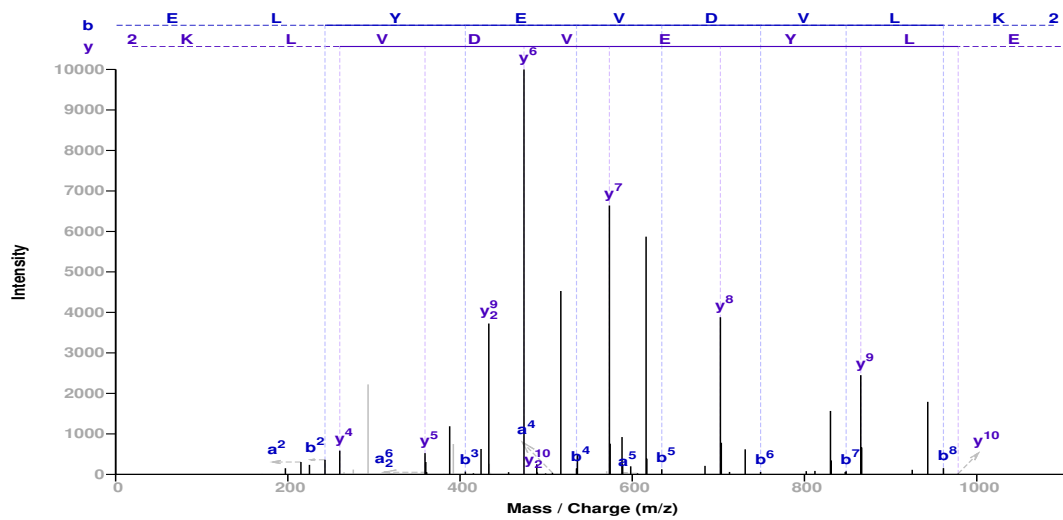

yeast0.Scan\_Number\_7912 Precursor m/z: 813.449 cosine: 0.736  $\alpha$ : 0.844

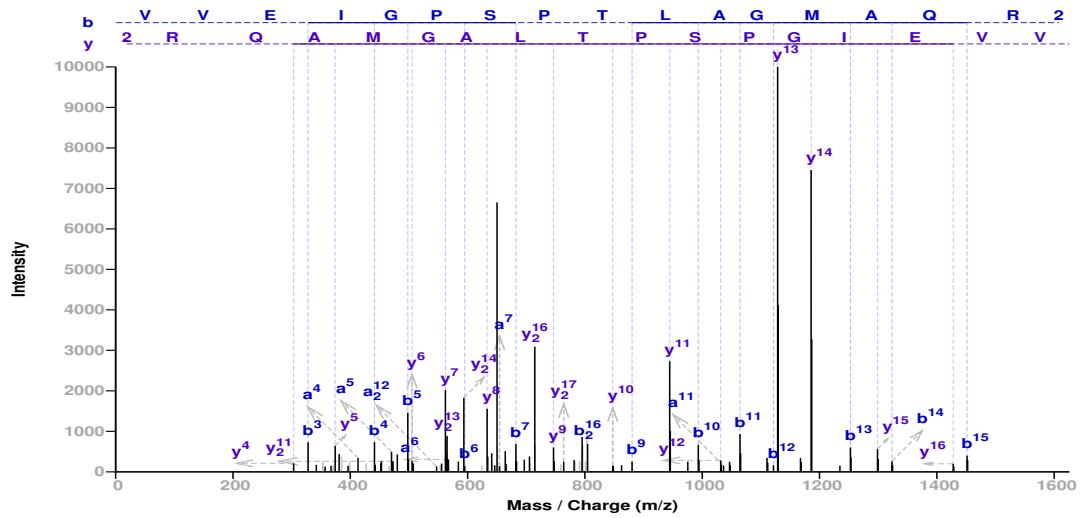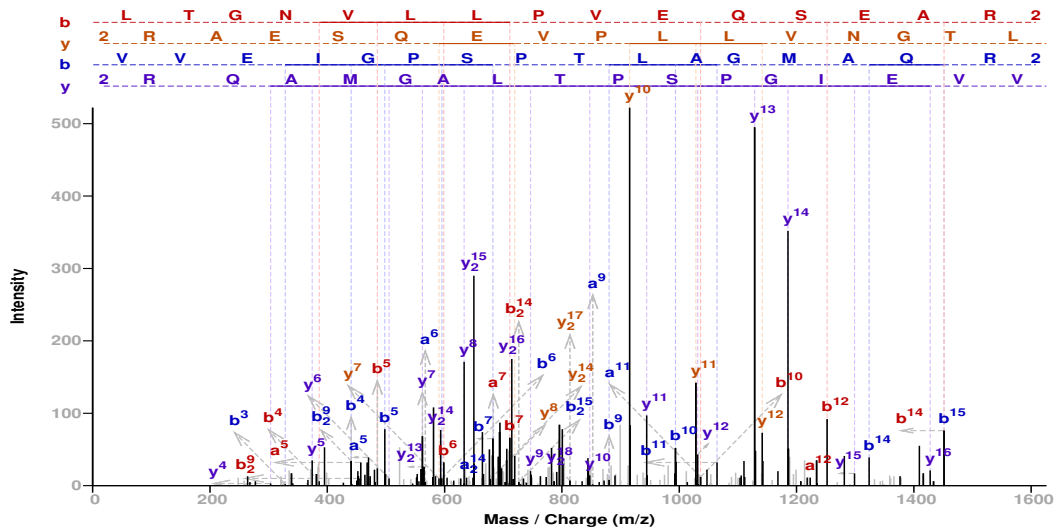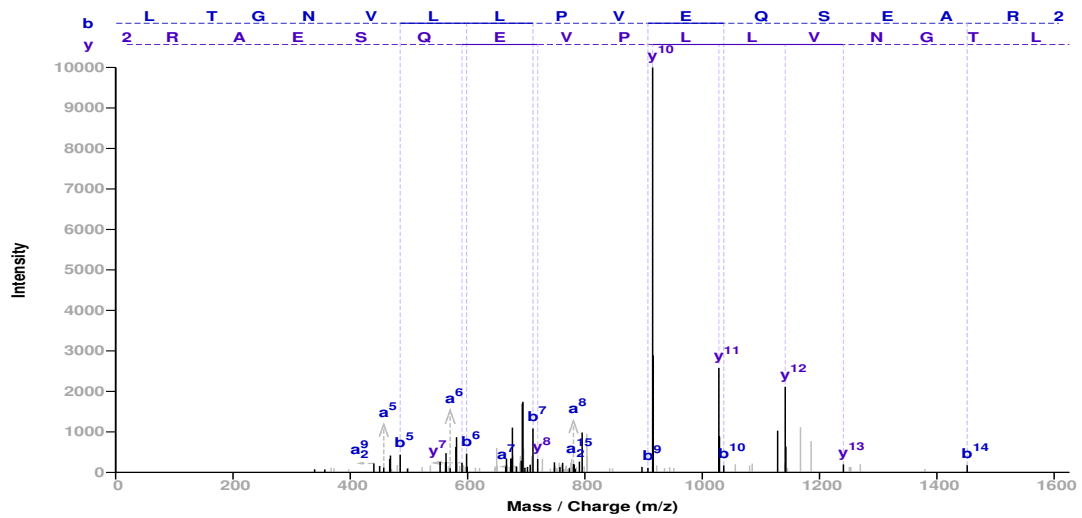

yeast0.Scan\_Number\_3254 Precursor m/z: 408.754 cosine: 0.892  $\alpha$ : 0.834

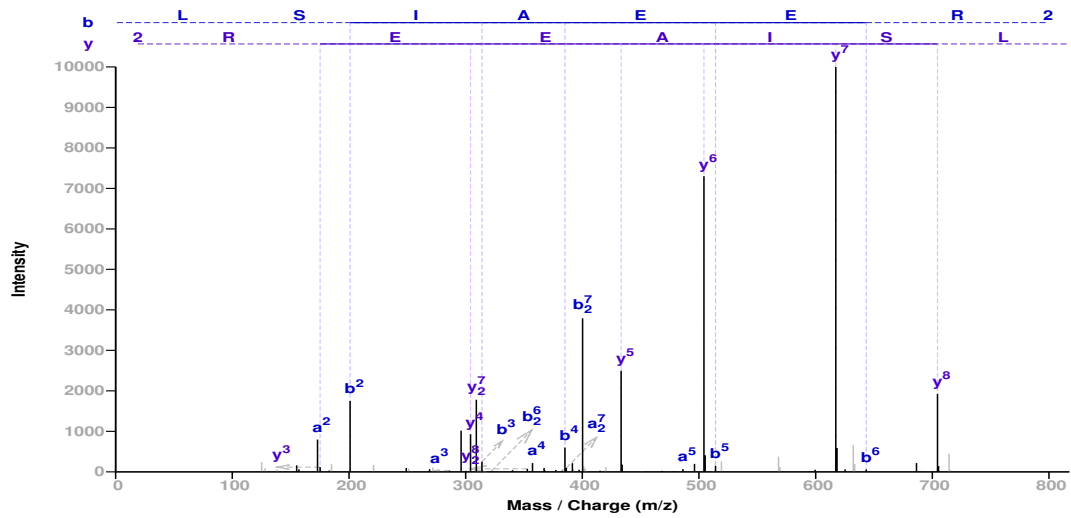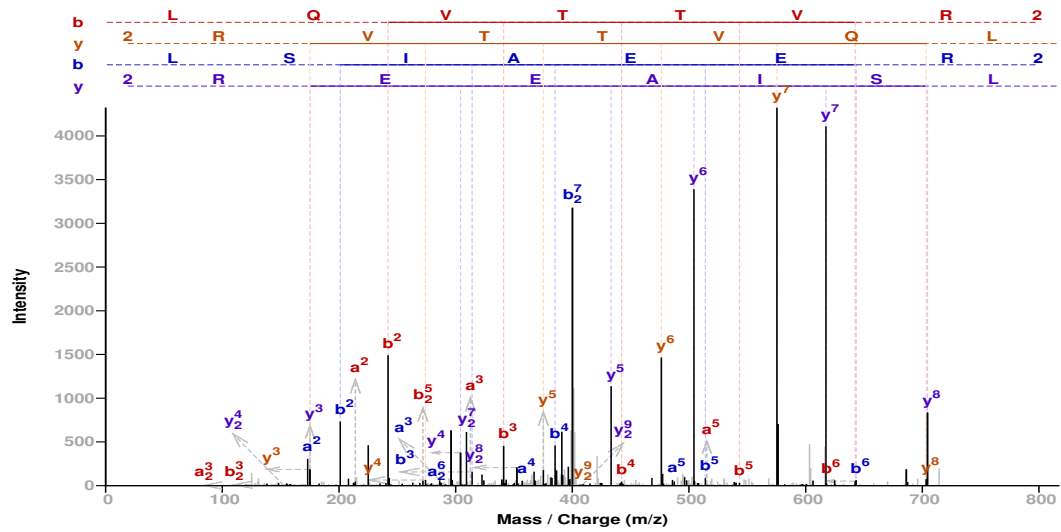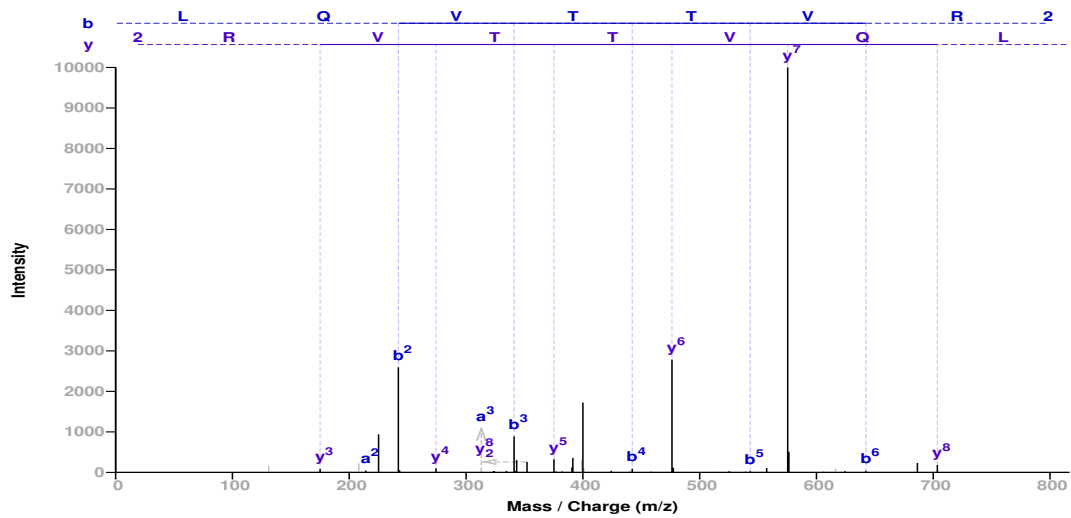

yeast0.Scan\_Number.11909 Precursor m/z: 833.954 cosine: 0.766  $\alpha$ : 0.814

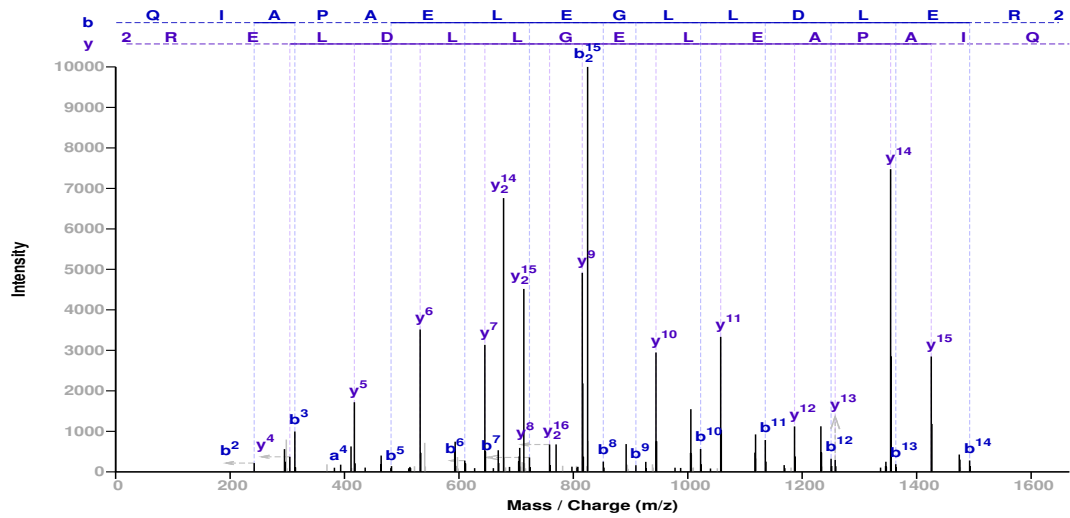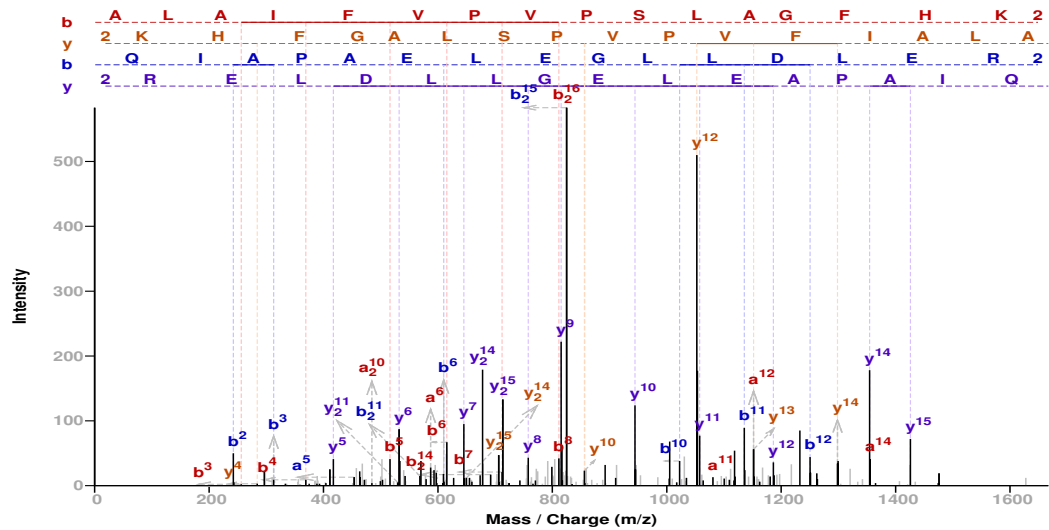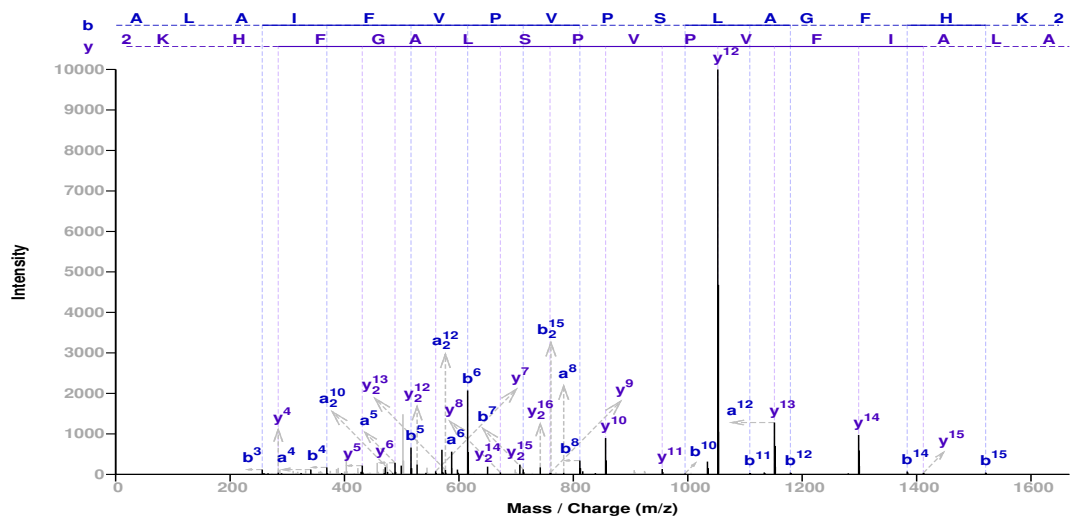

yeast0\_Scan\_Number\_3485 Precursor m/z: 459.250 cosine: 0.844  $\alpha$ : 0.810

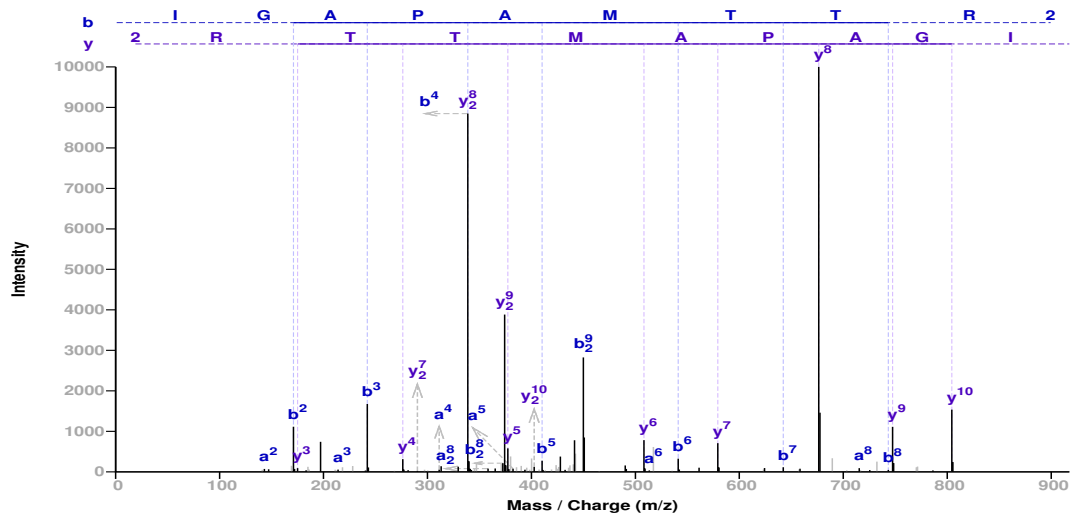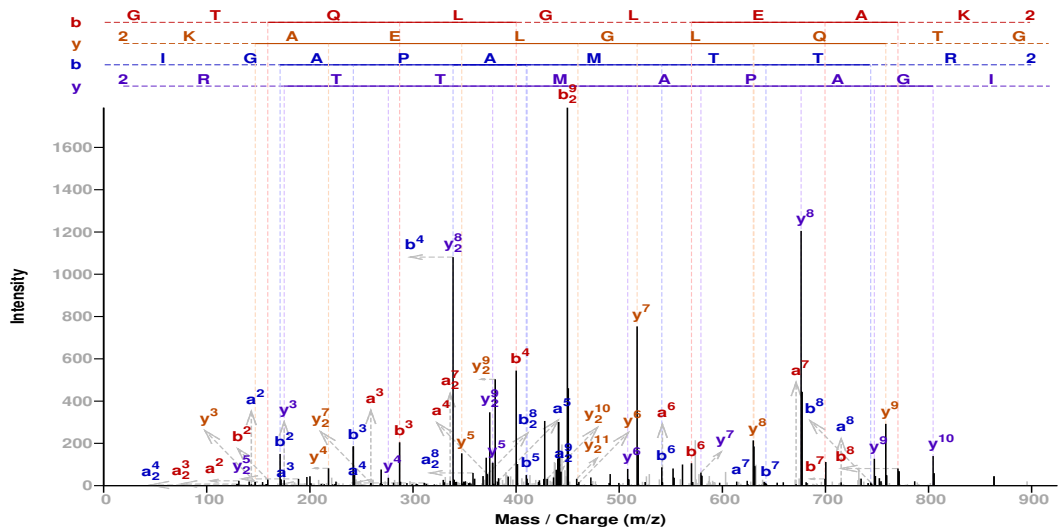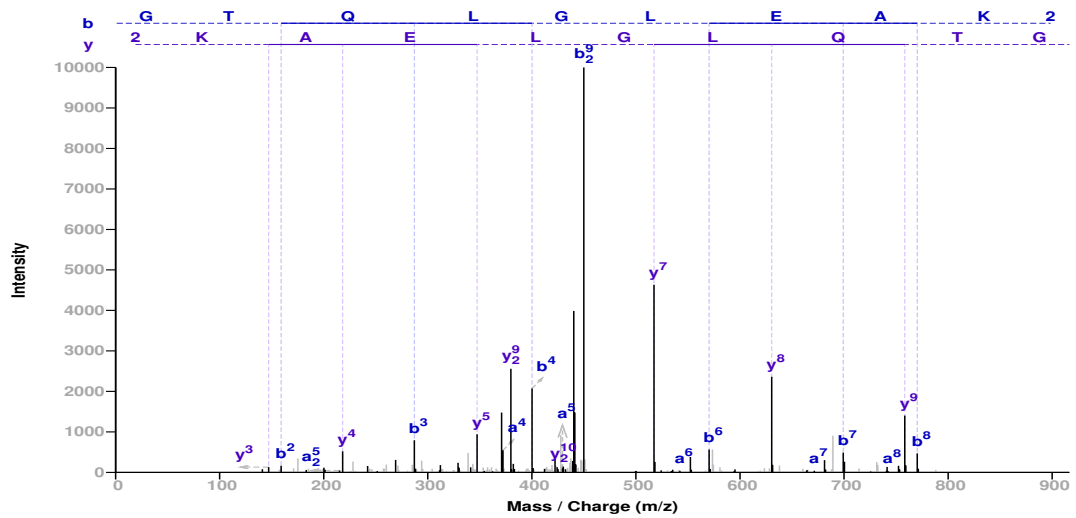

yeast0\_Scan\_Number\_3536 Precursor m/z: 551.795 cosine: 0.738  $\alpha$ : 0.808

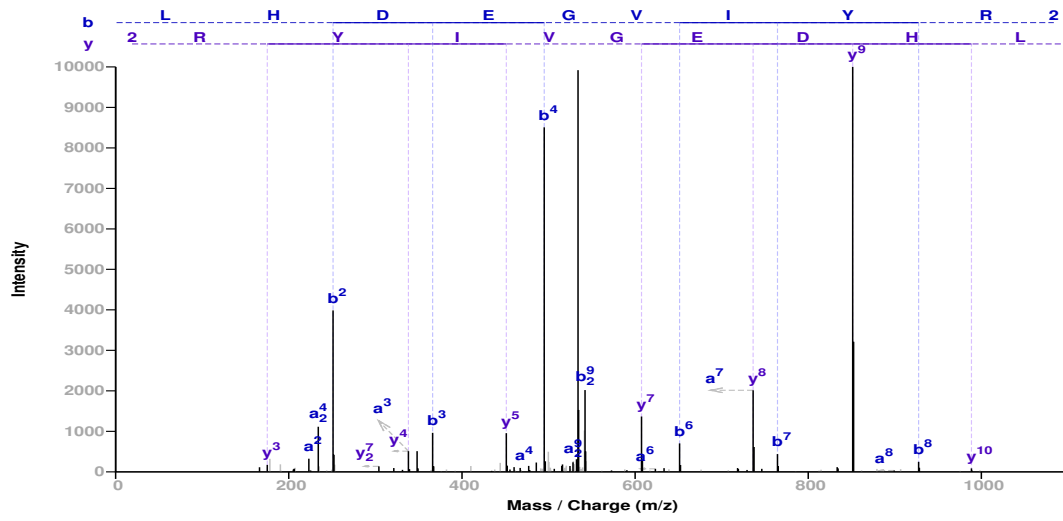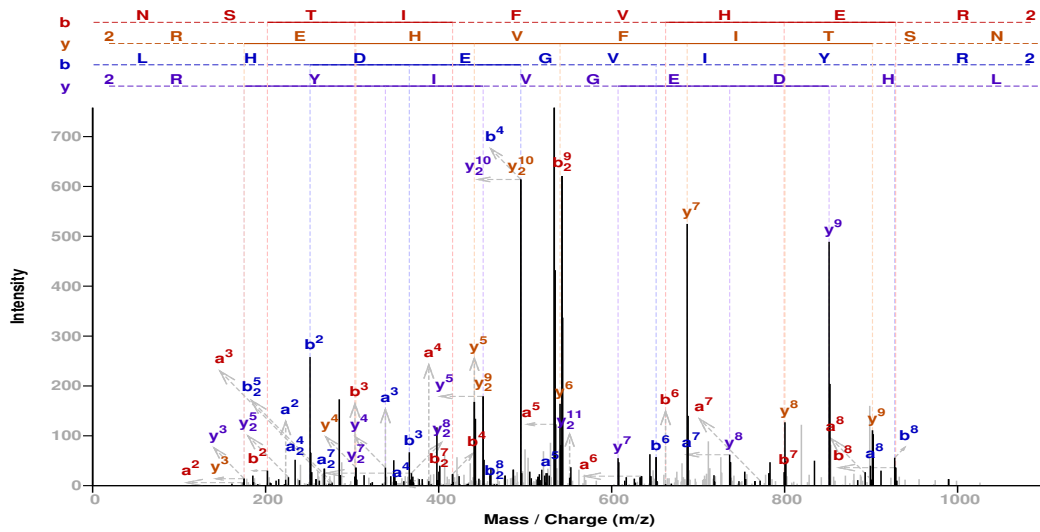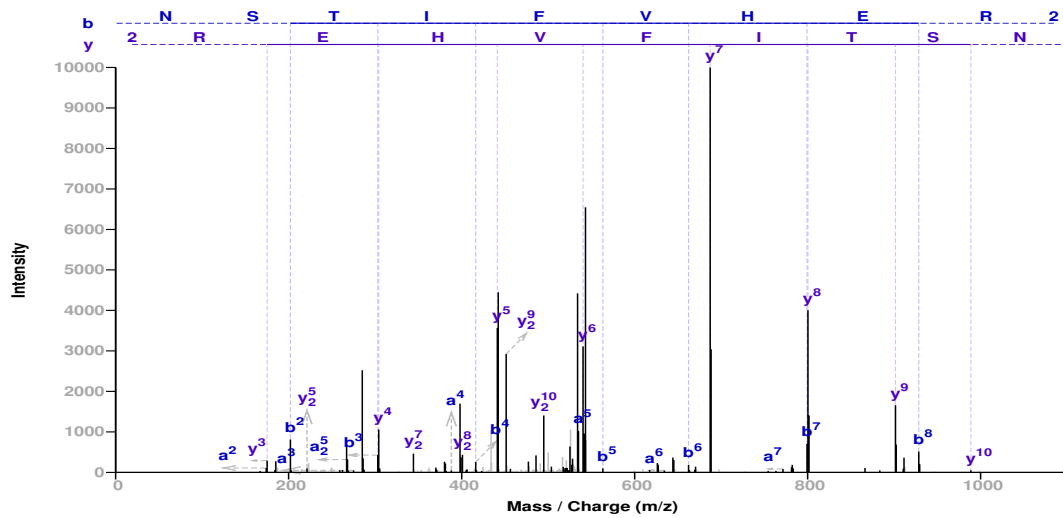

yeast0\_Scan\_Number\_8111 Precursor m/z: 860.461 cosine: 0.780  $\alpha$ : 0.802

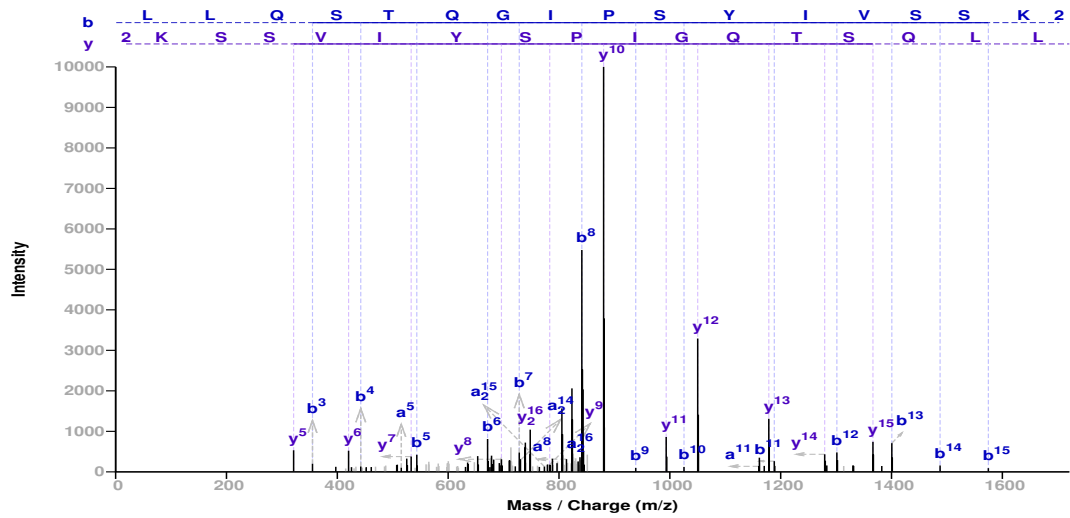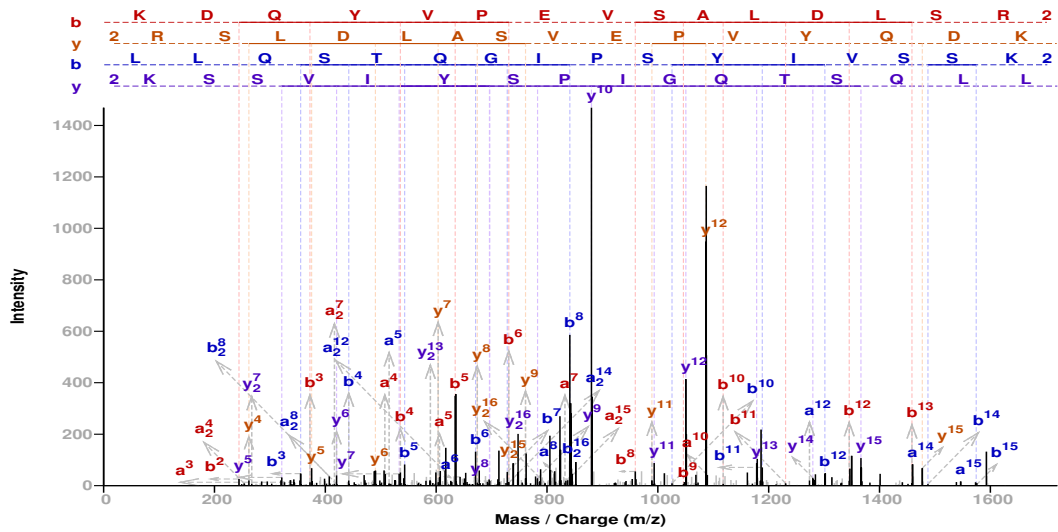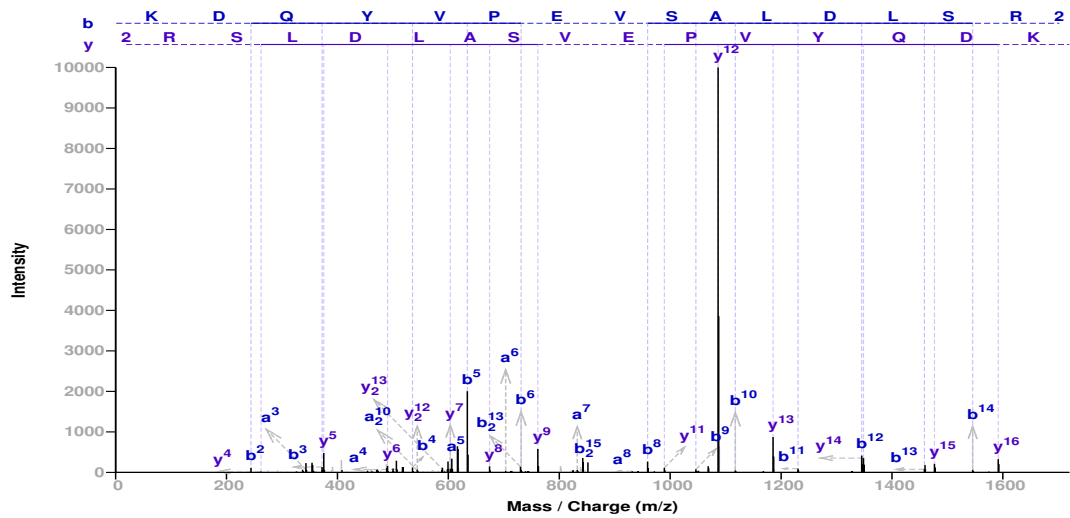



yeast0.Scan\_Number\_2322 Precursor m/z: 475.212 cosine: 0.798  $\alpha$ : 0.790

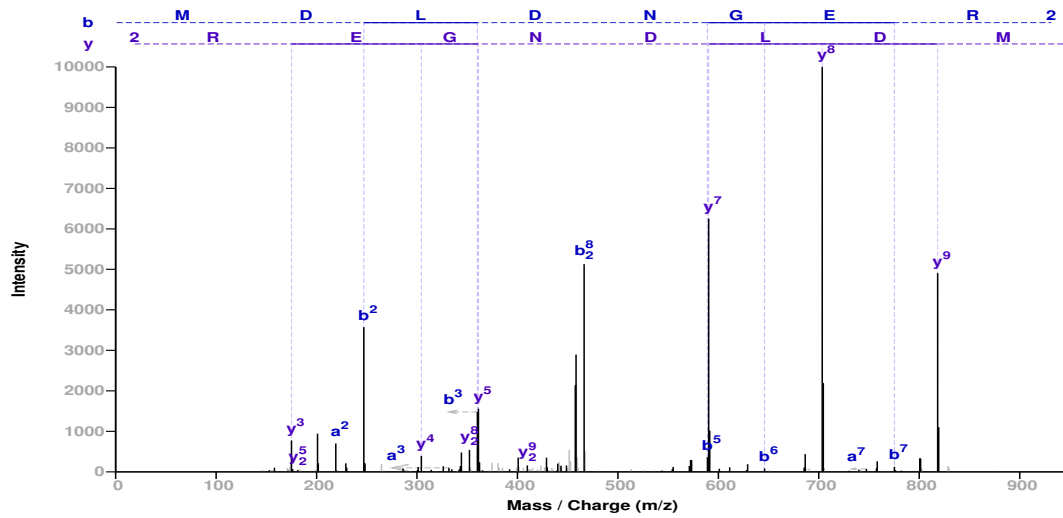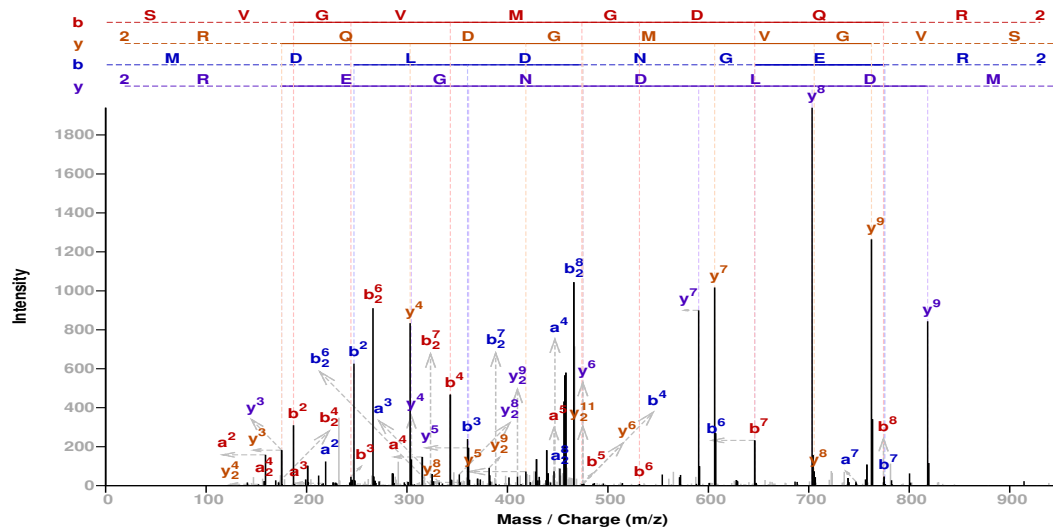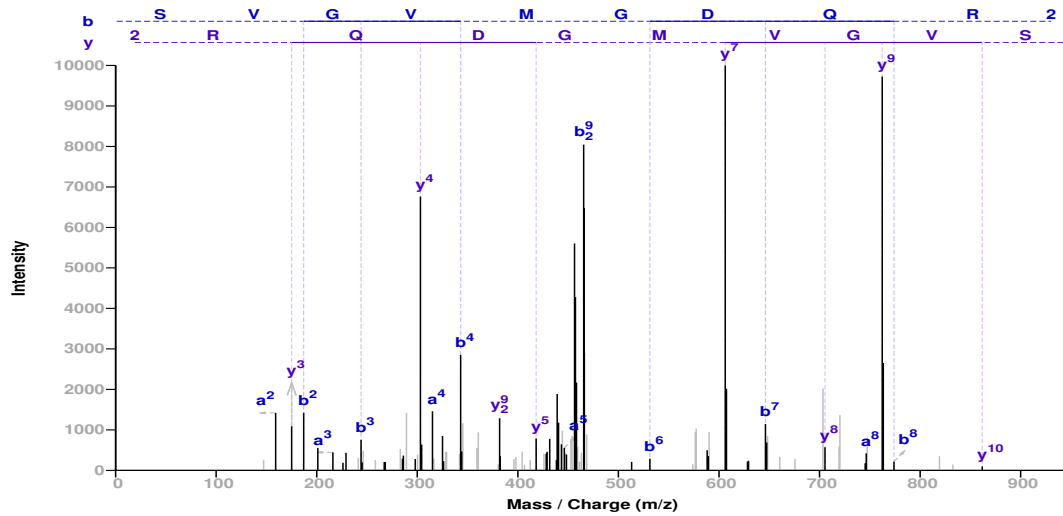

yeast0.Scan\_Number\_2295 Precursor m/z: 447.232 cosine: 0.796  $\alpha$ : 0.777

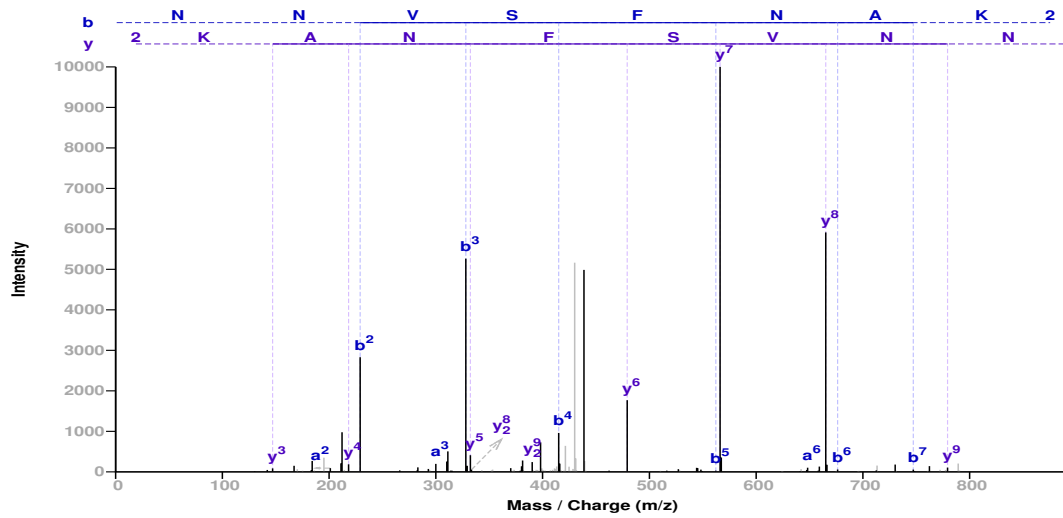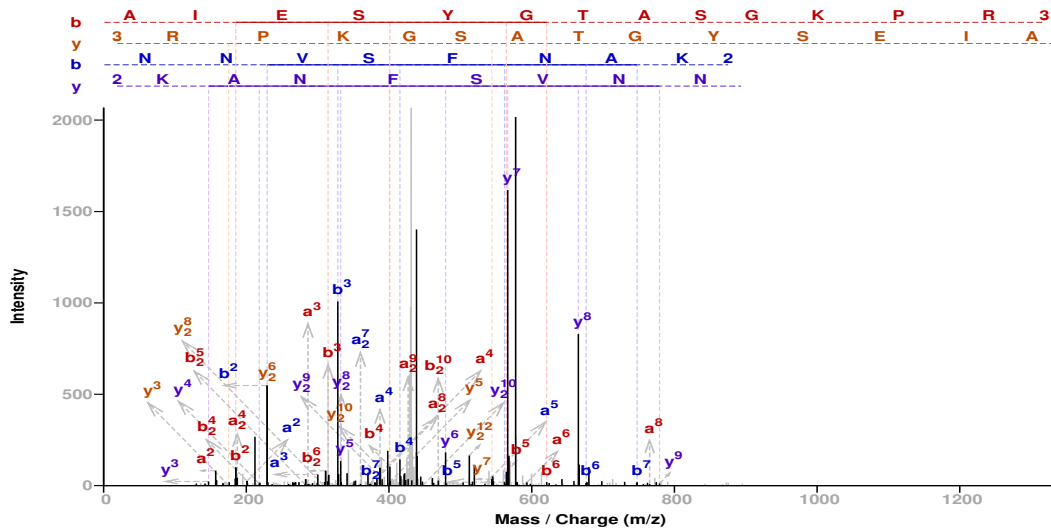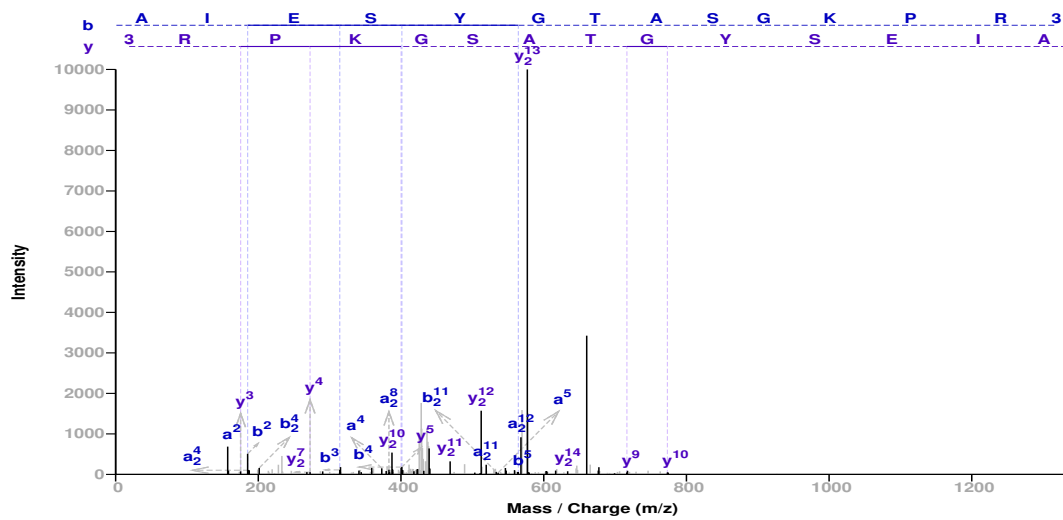

yeast0.Scan\_Number\_993 Precursor m/z: 451.720 cosine: 0.785  $\alpha$ : 0.757

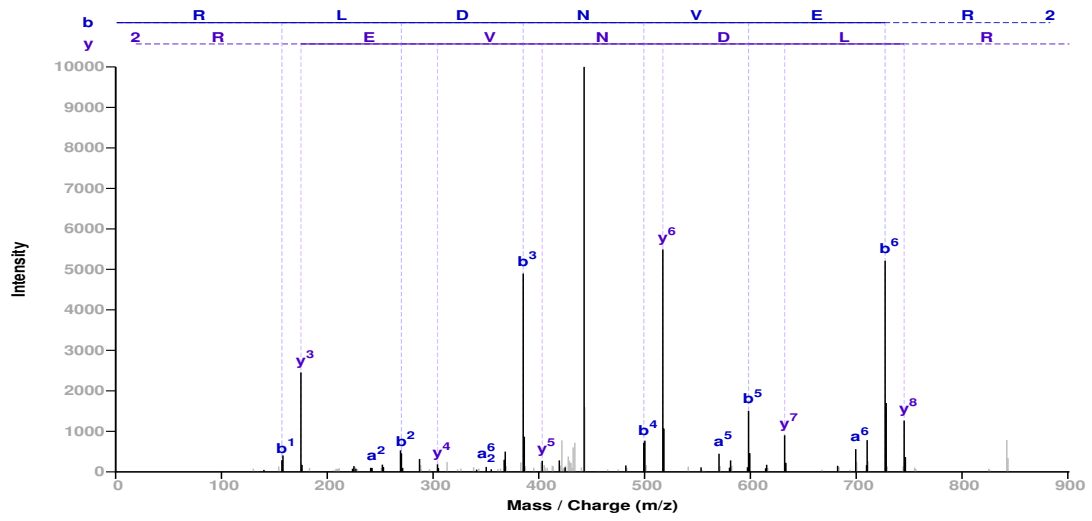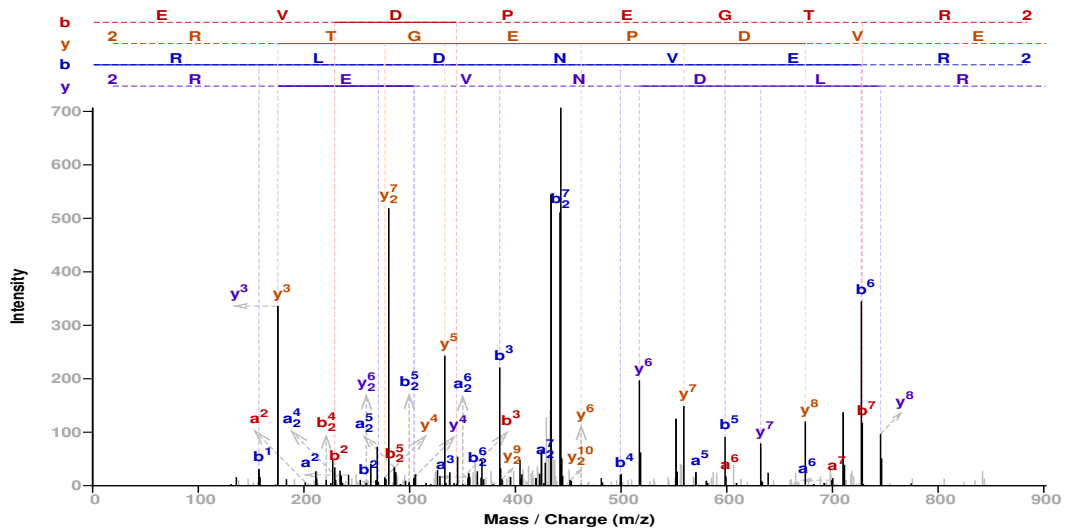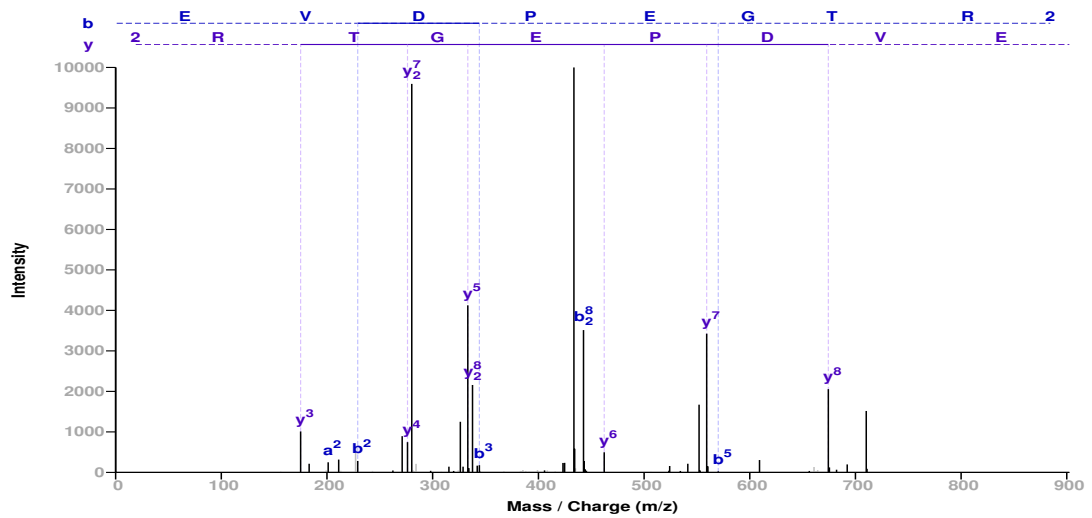

yeast0.Scan\_Number.12025 Precursor m/z: 799.962 cosine: 0.766  $\alpha$ : 0.753

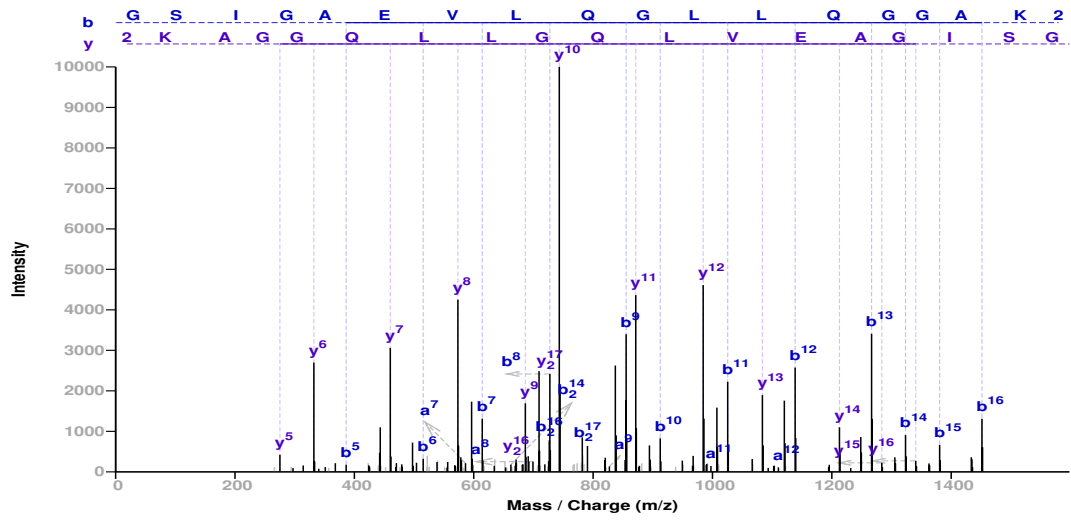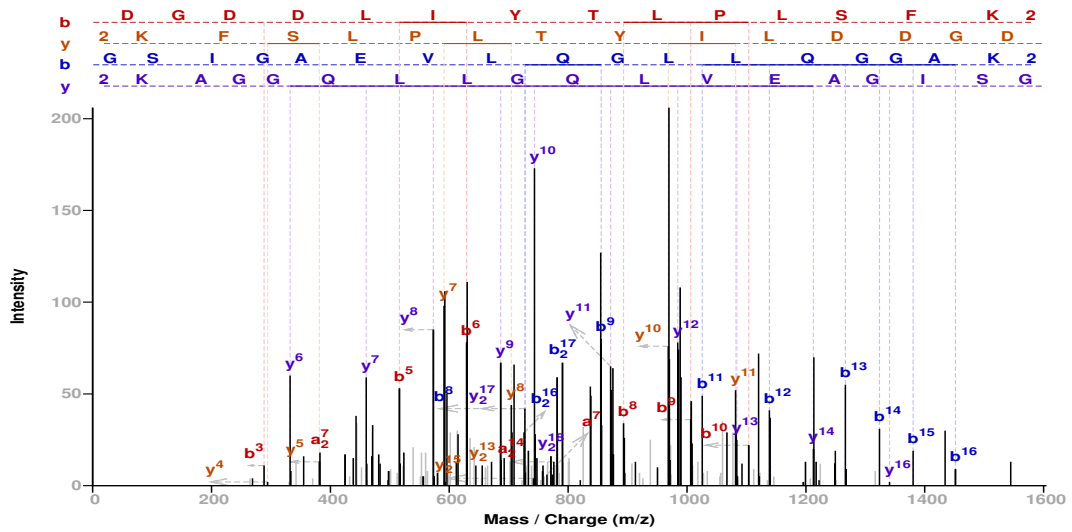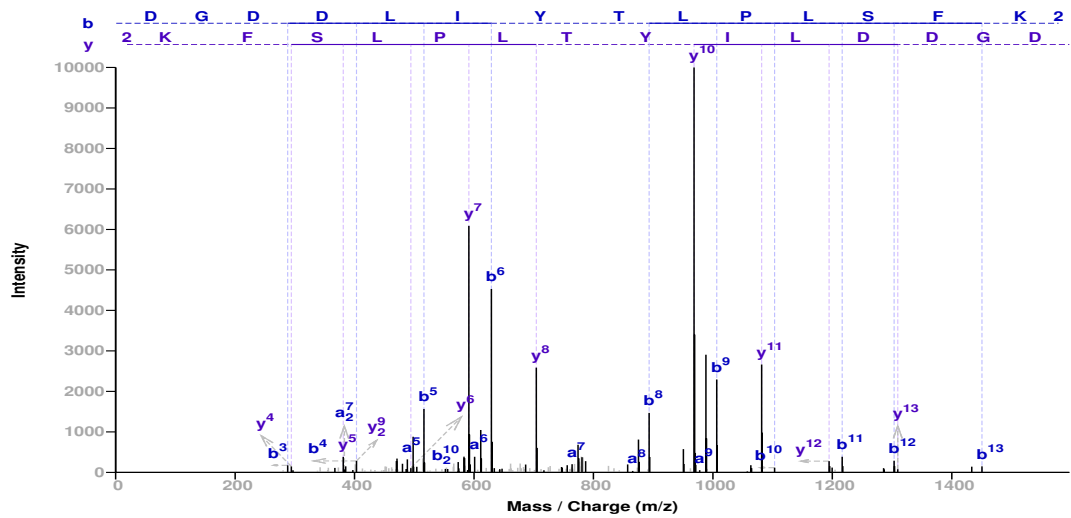

yeast0.Scan\_Number\_1485 Precursor m/z: 469.242 cosine: 0.760  $\alpha$ : 0.747

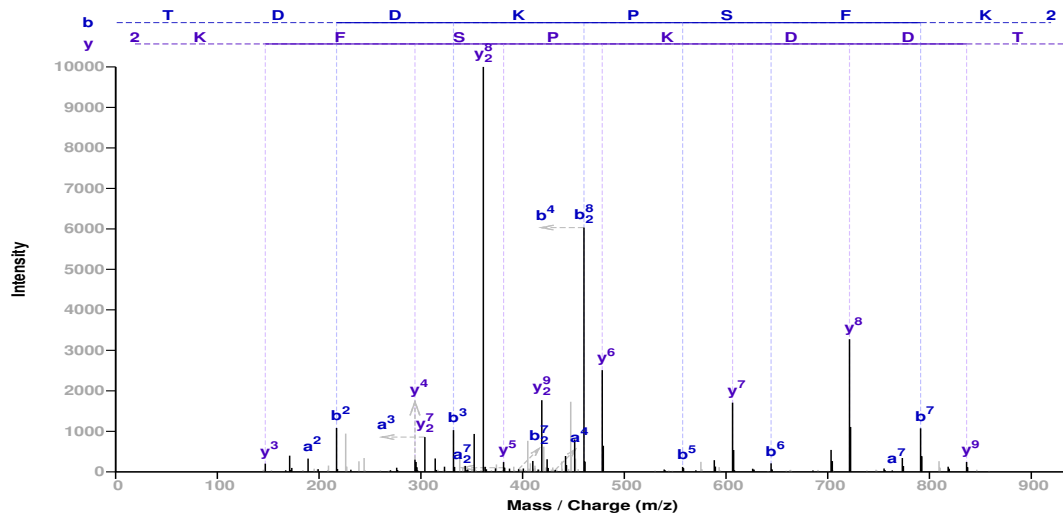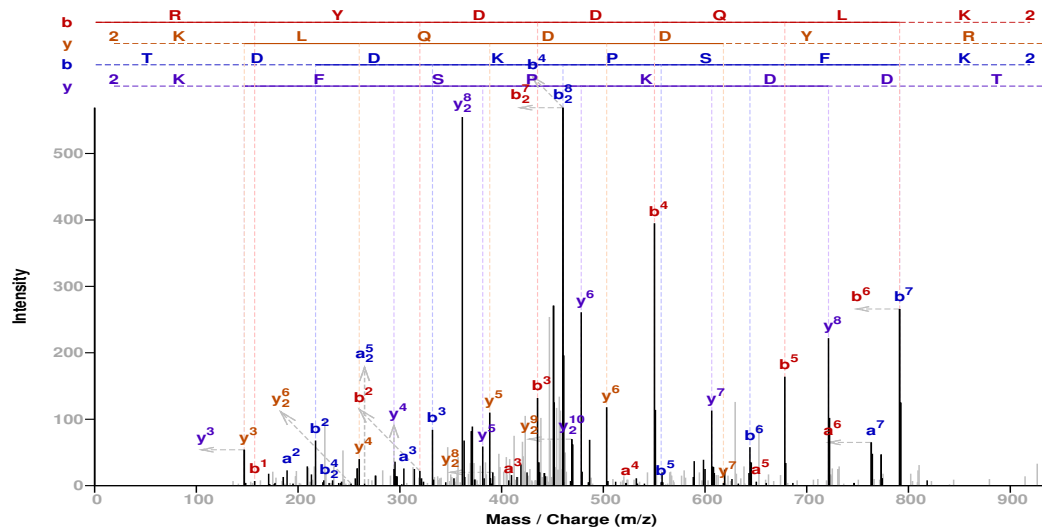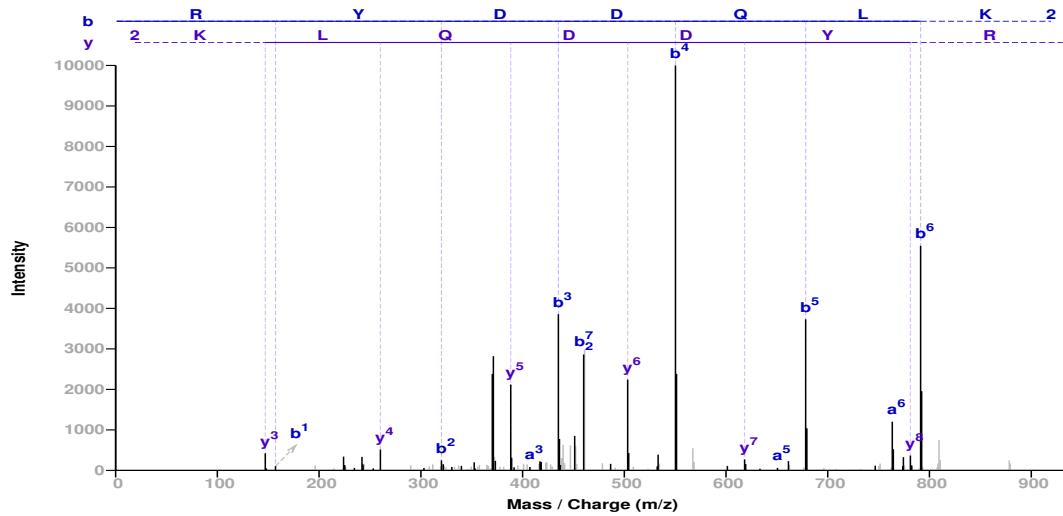

yeast0.Scan\_Number\_2768 Precursor m/z: 512.272 cosine: 0.726  $\alpha$ : 0.733

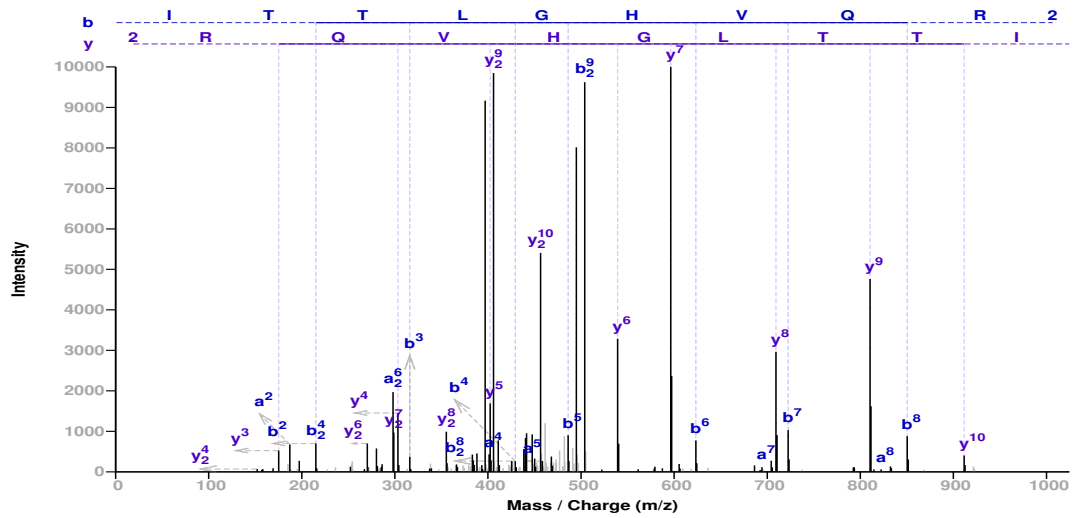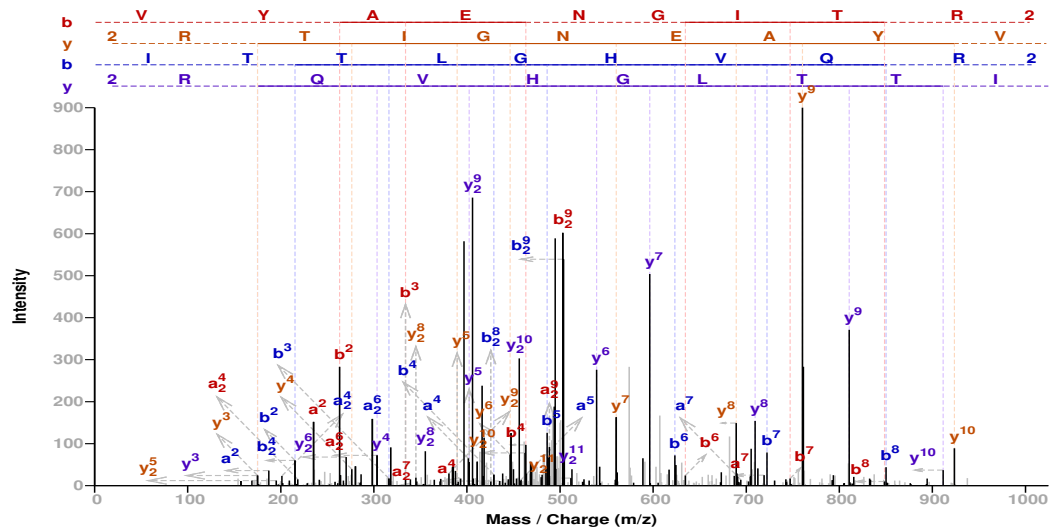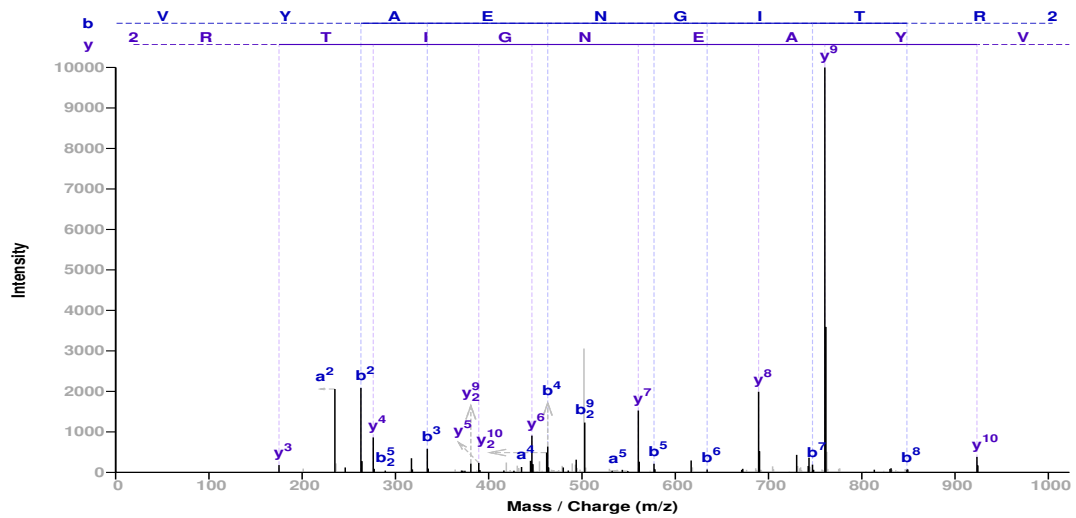



yeast0\_Scan\_Number\_1589 Precursor m/z: 352.225 cosine: 0.741  $\alpha$ : 0.722

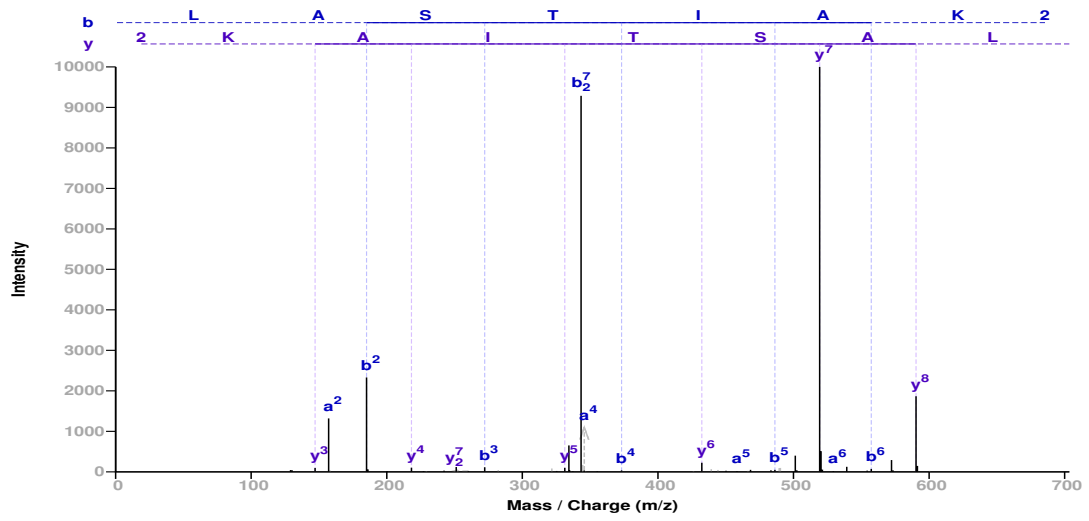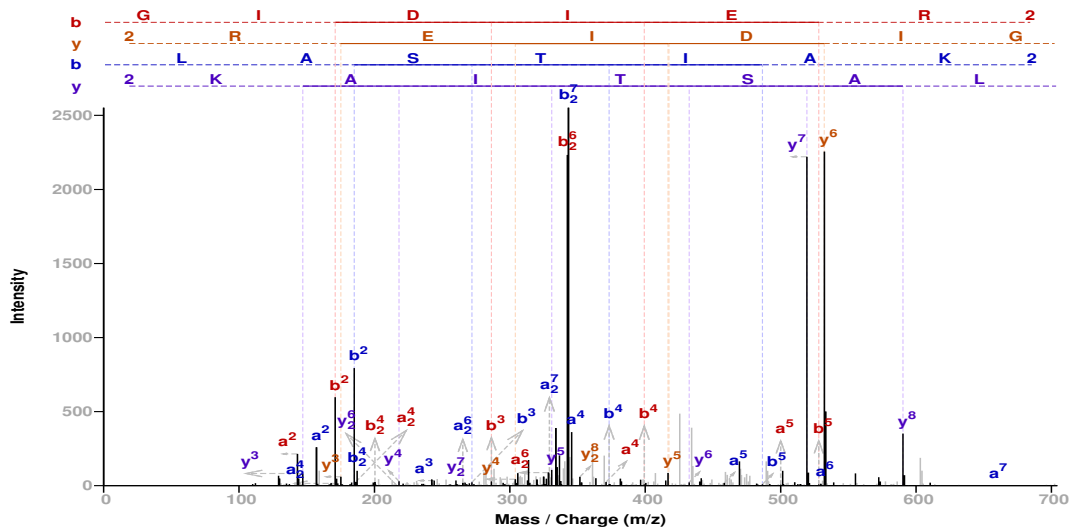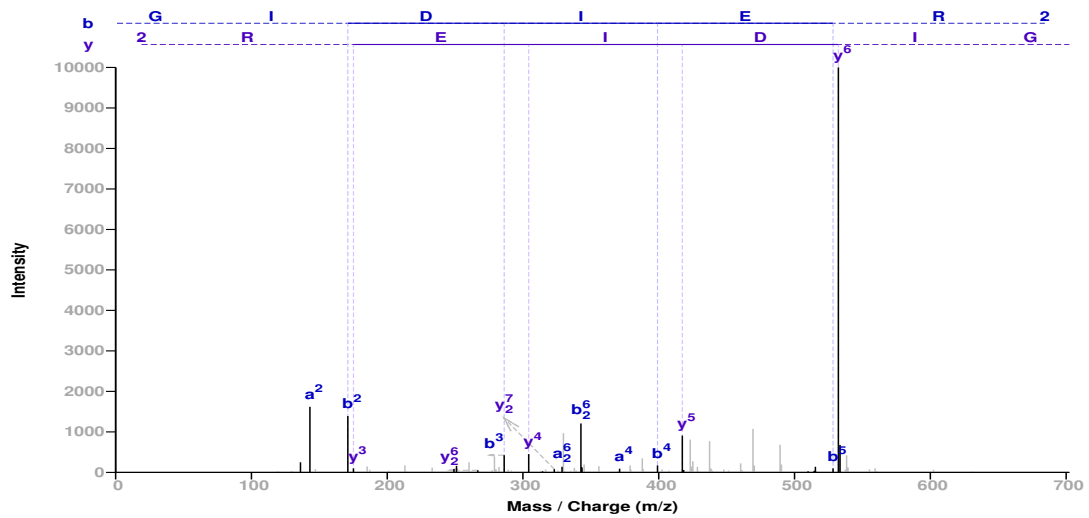



yeast0.Scan\_Number\_2317 Precursor m/z: 509.253 cosine: 0.884  $\alpha$ : 0.720

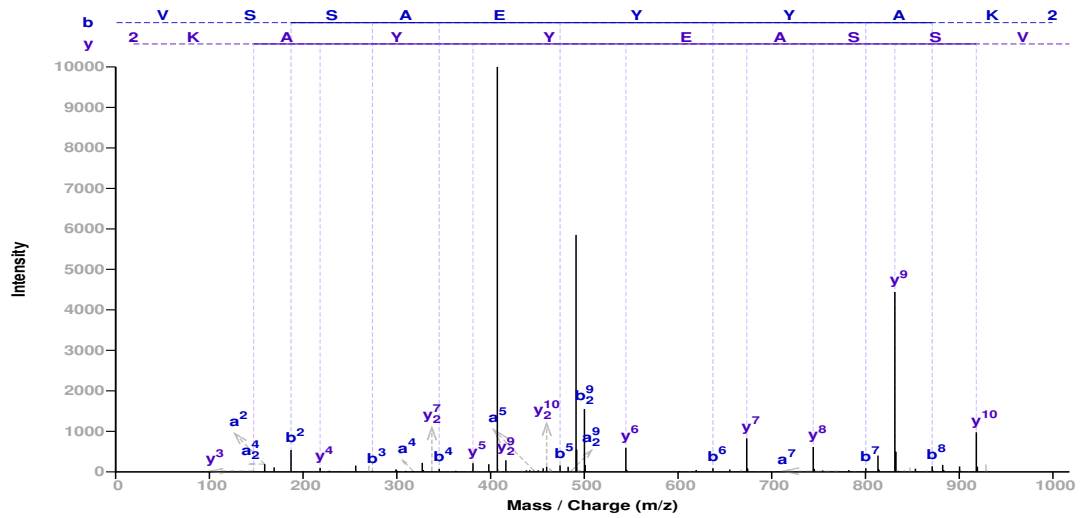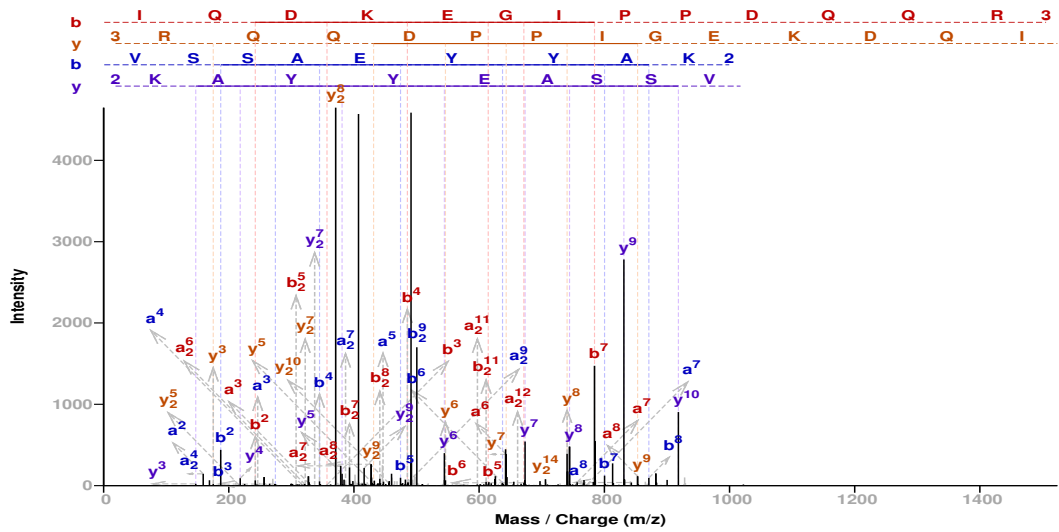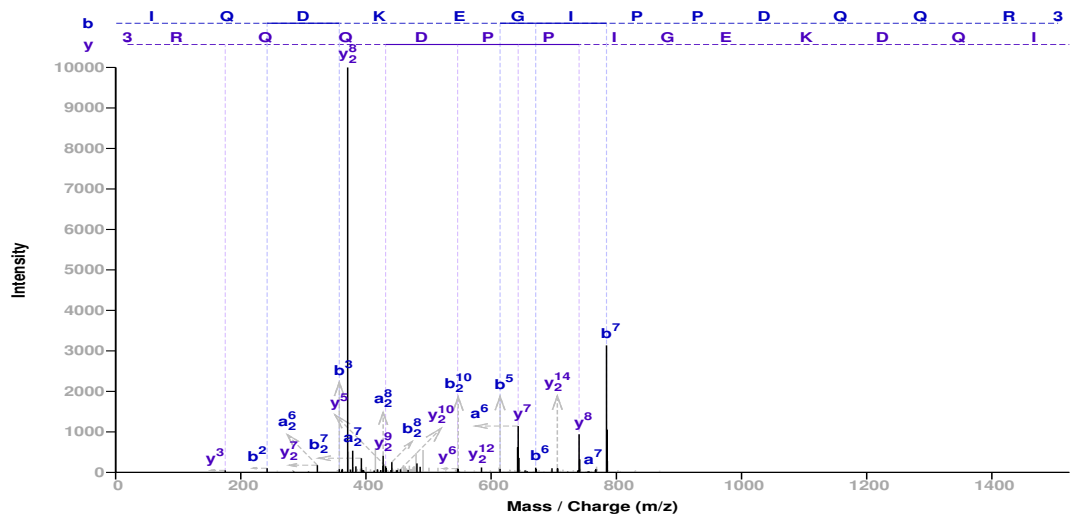

yeast0\_Scan\_Number\_3284 Precursor m/z: 353.881 cosine: 0.805  $\alpha$ : 0.710

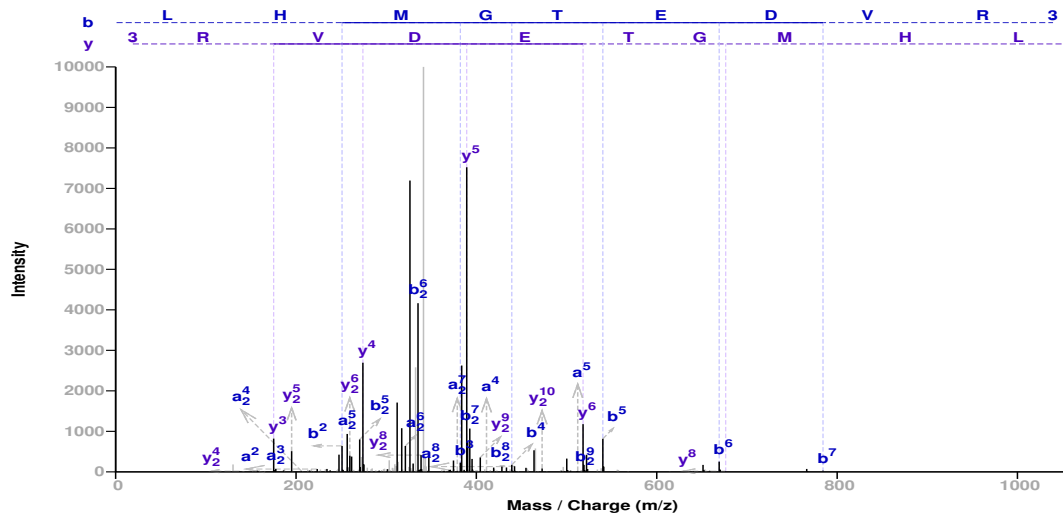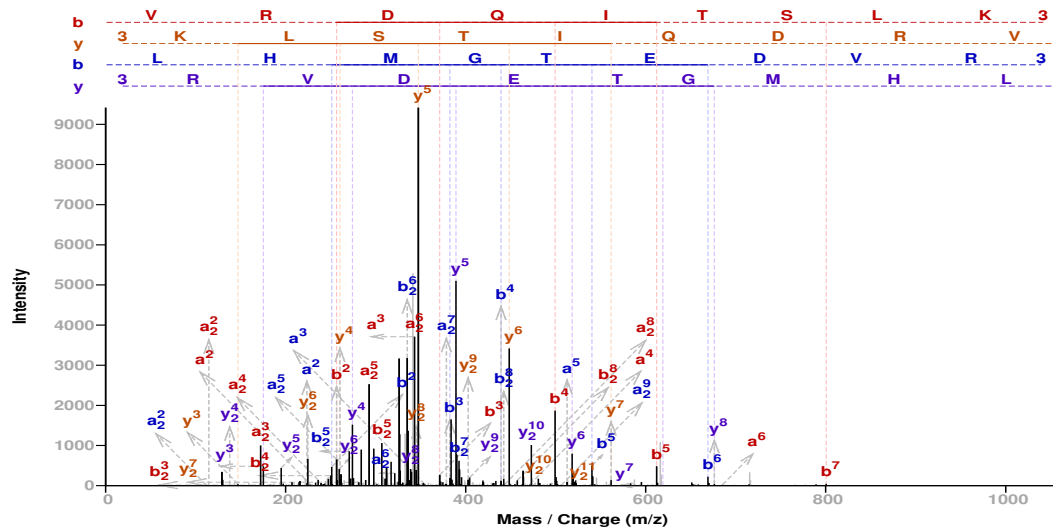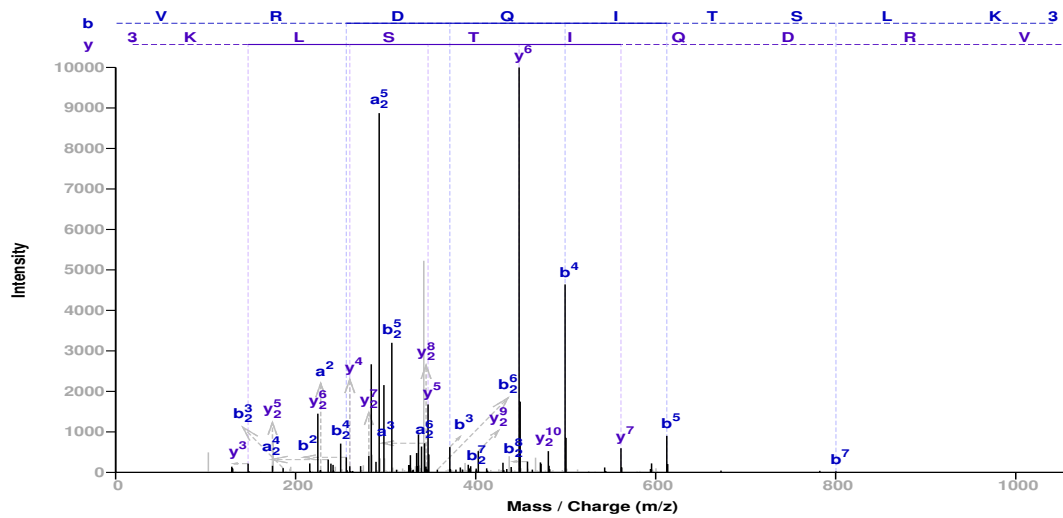

yeast0.Scan\_Number\_3520 Precursor m/z: 409.900 cosine: 0.745  $\alpha$ : 0.705

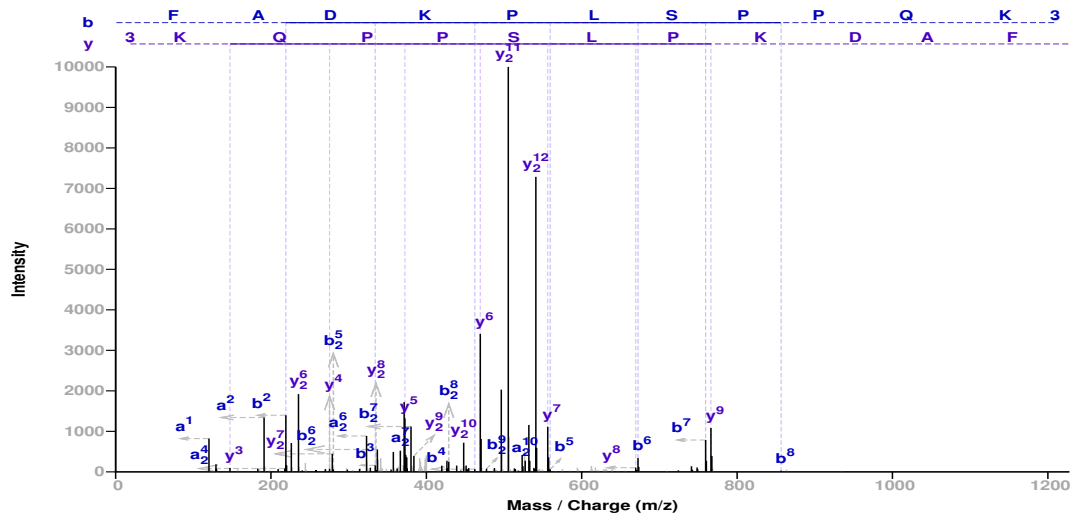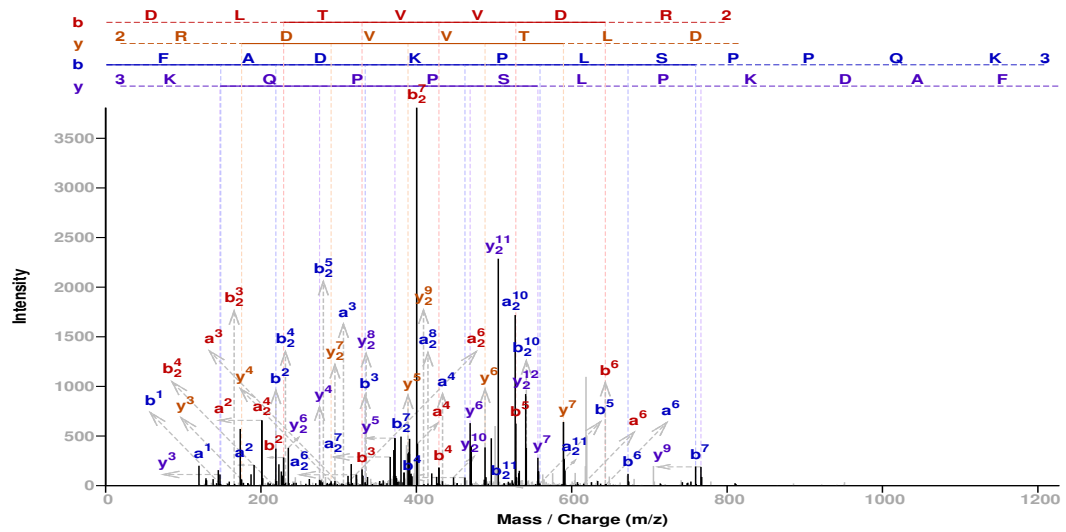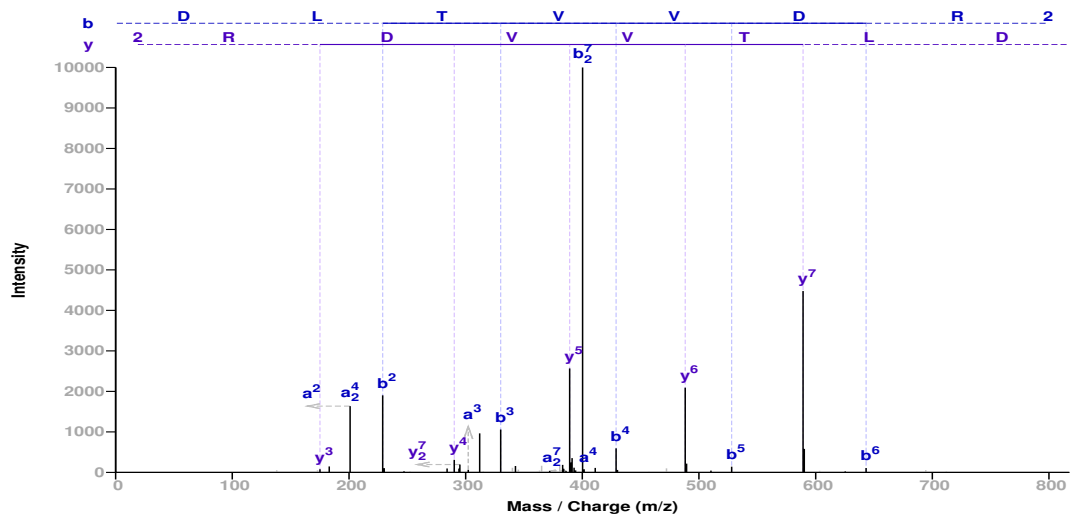

yeast0.Scan\_Number.2573 Precursor m/z: 610.835 cosine: 0.797  $\alpha$ : 0.701

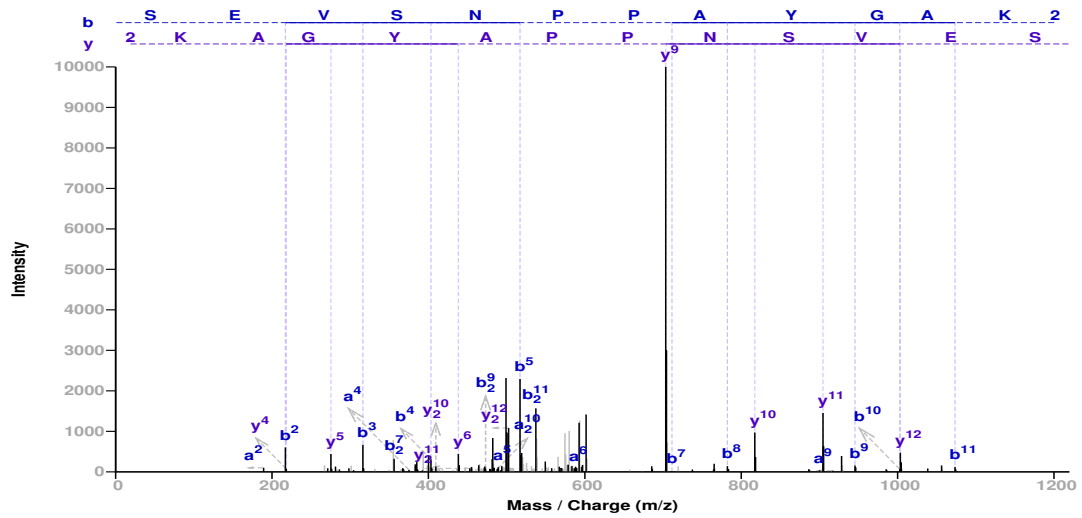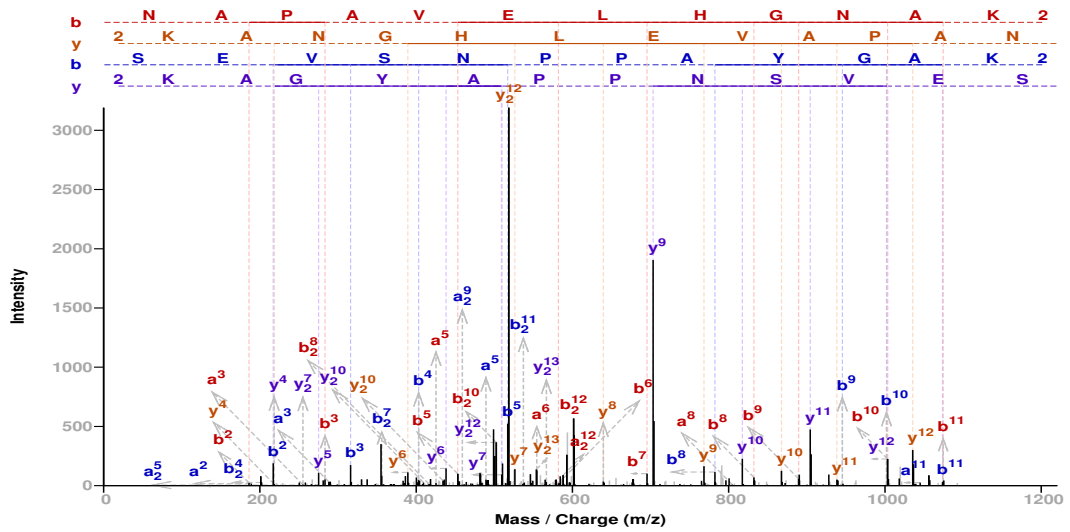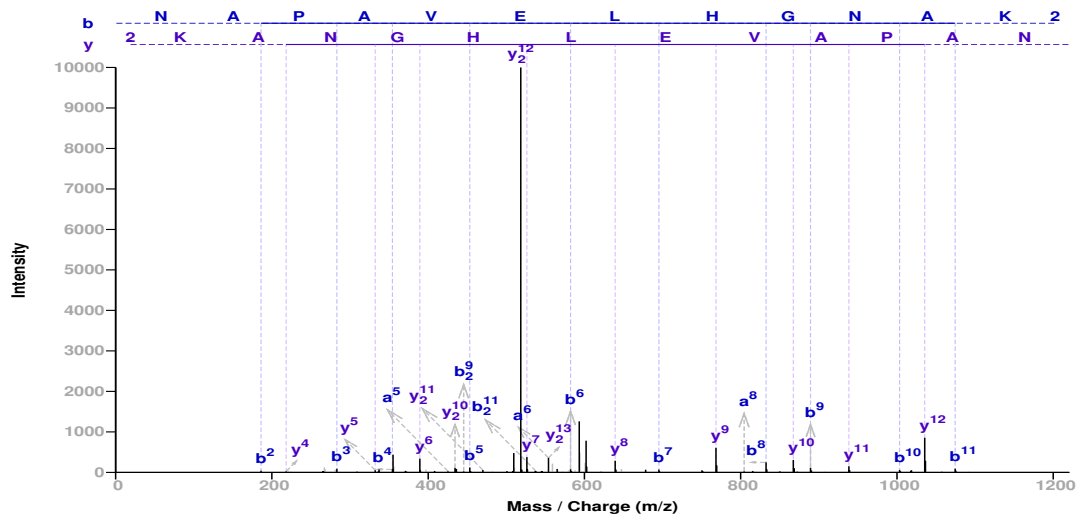

yeast0.Scan\_Number\_3864 Precursor m/z: 484.743 cosine: 0.821  $\alpha$ : 0.695

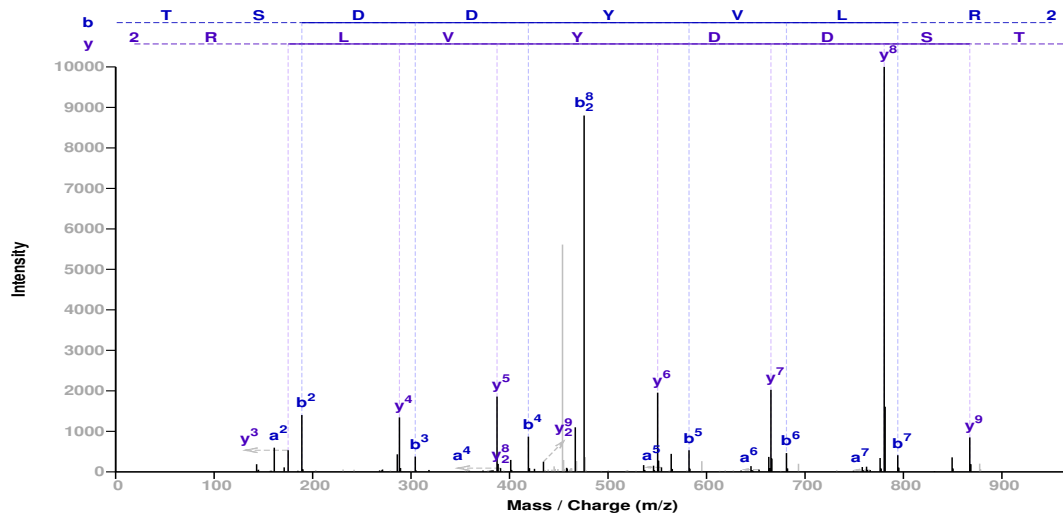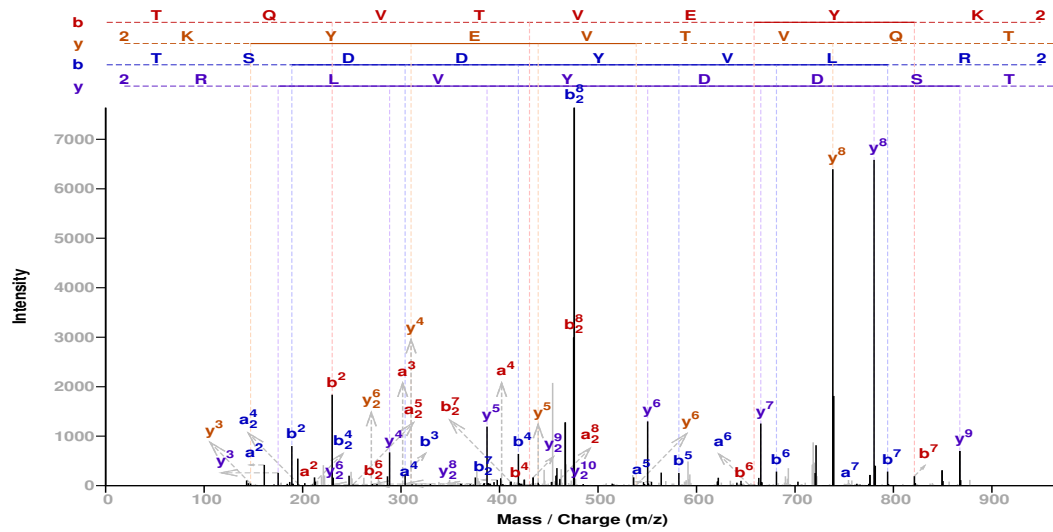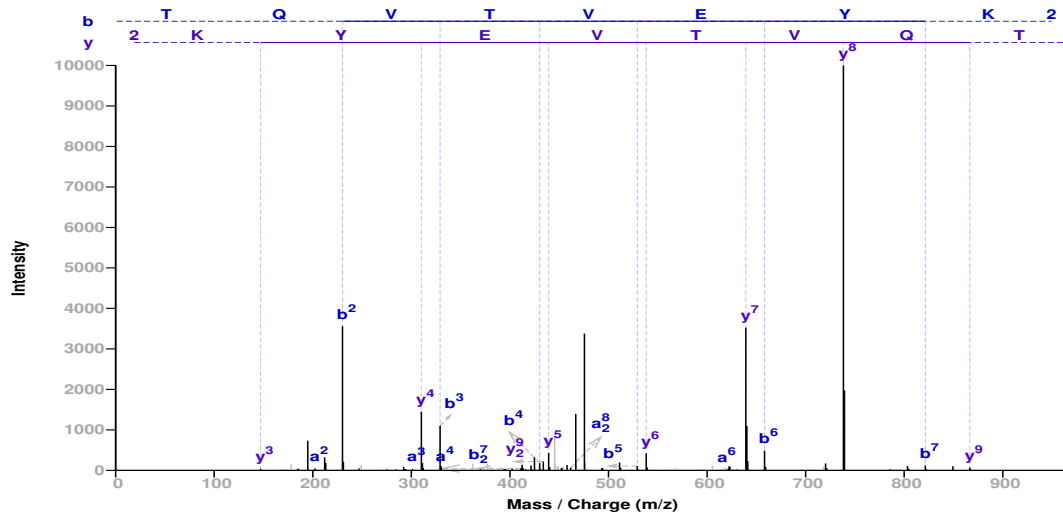

yeast0.Scan\_Number\_5255 Precursor m/z: 522.229 cosine: 0.732  $\alpha$ : 0.693

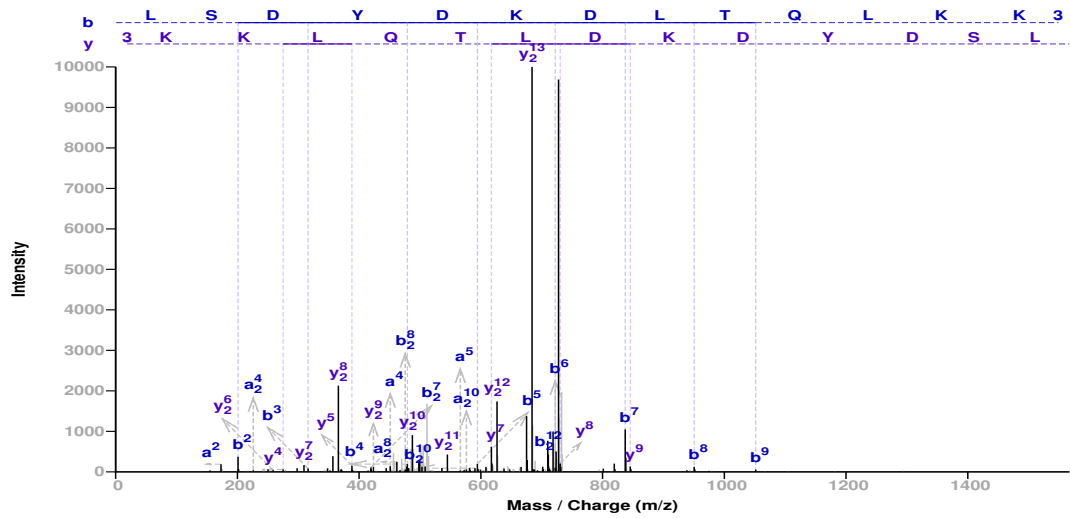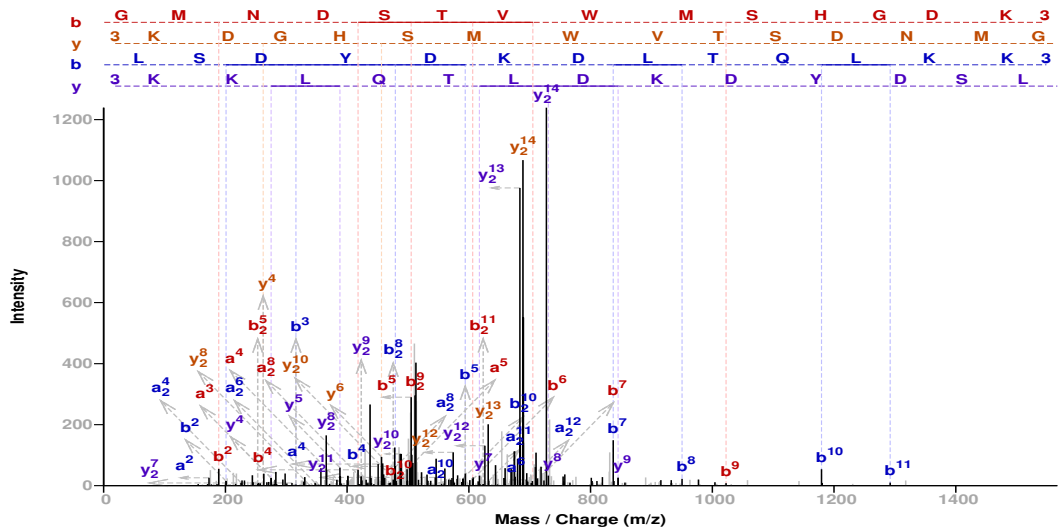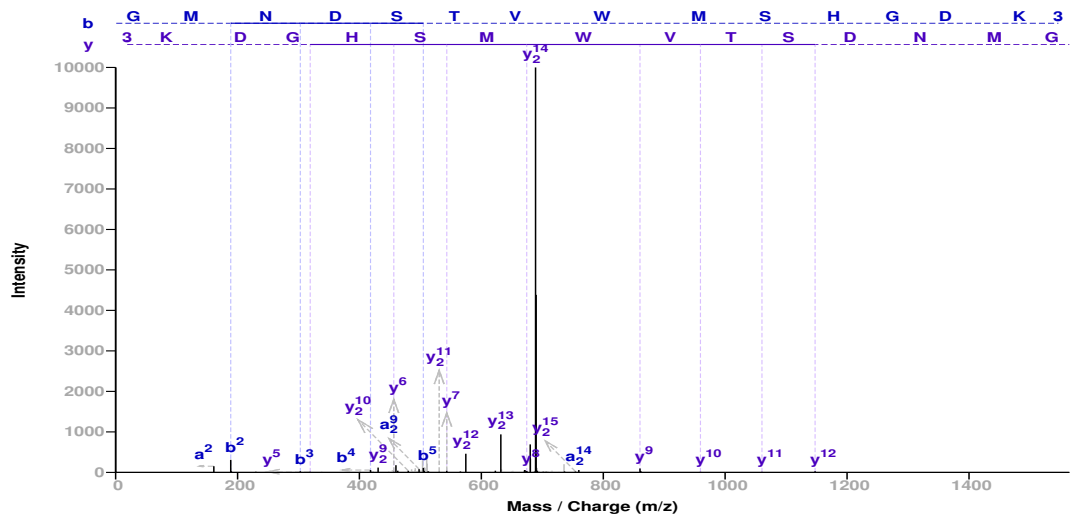

yeast0.Scan\_Number\_5471 Precursor m/z: 532.789 cosine: 0.722  $\alpha$ : 0.692

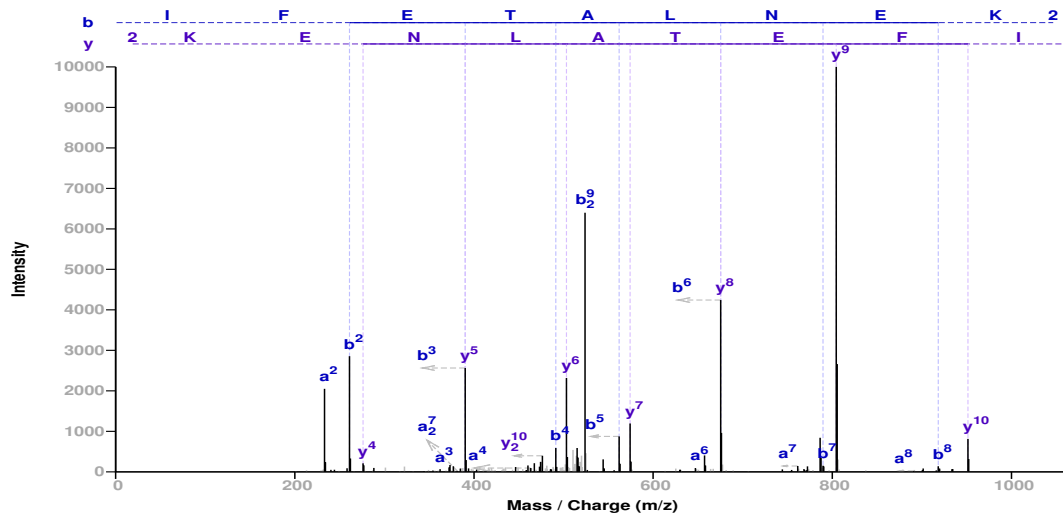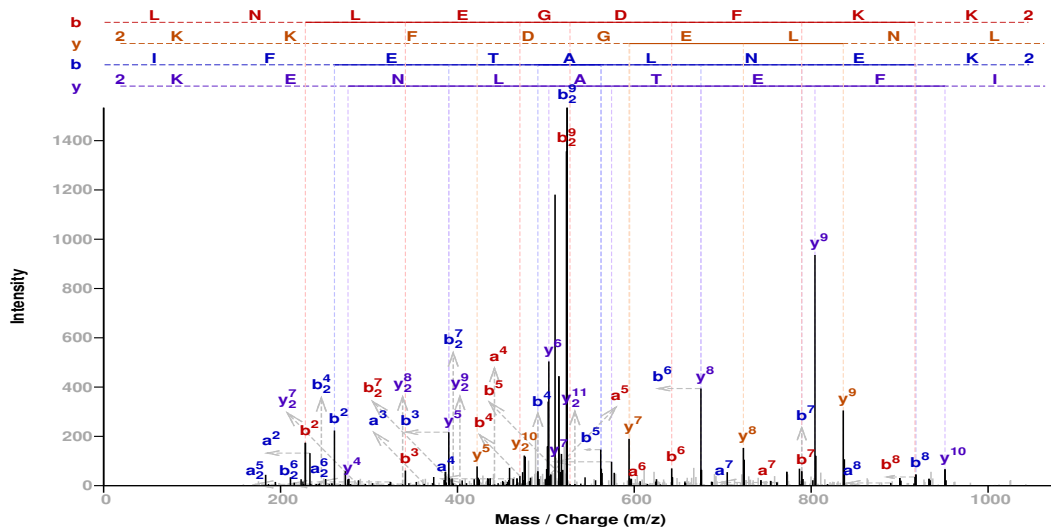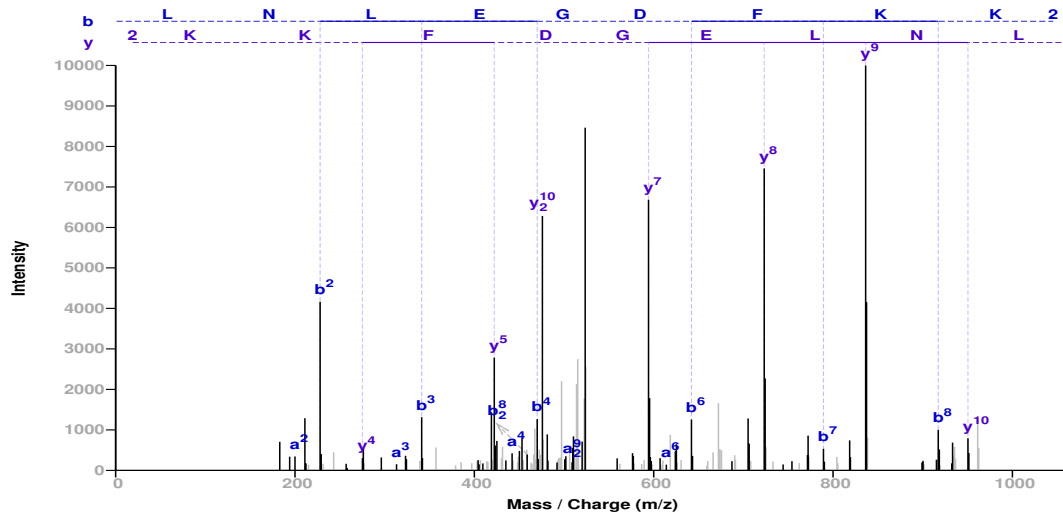

yeast0\_Scan\_Number\_1646 Precursor m/z: 516.280 cosine: 0.863  $\alpha$ : 0.684

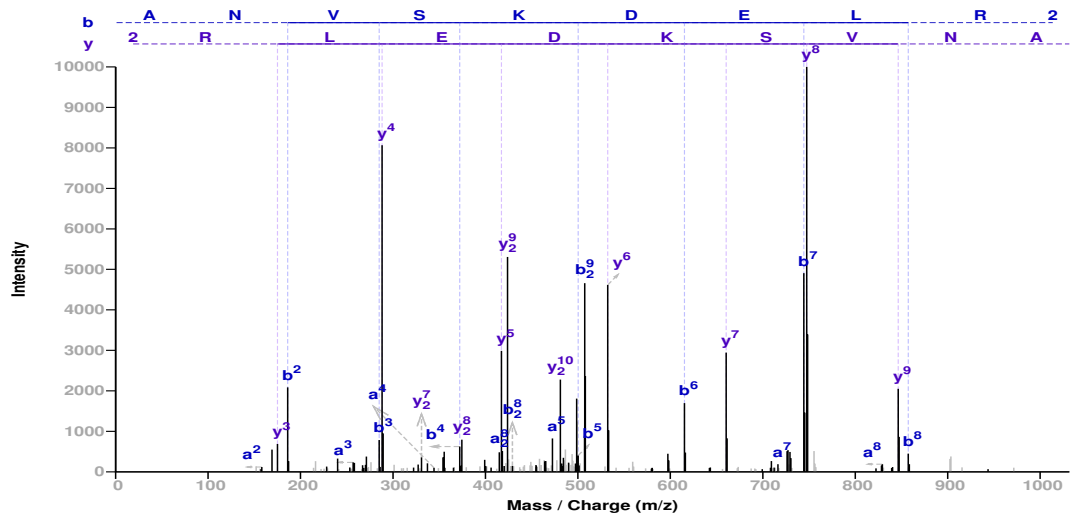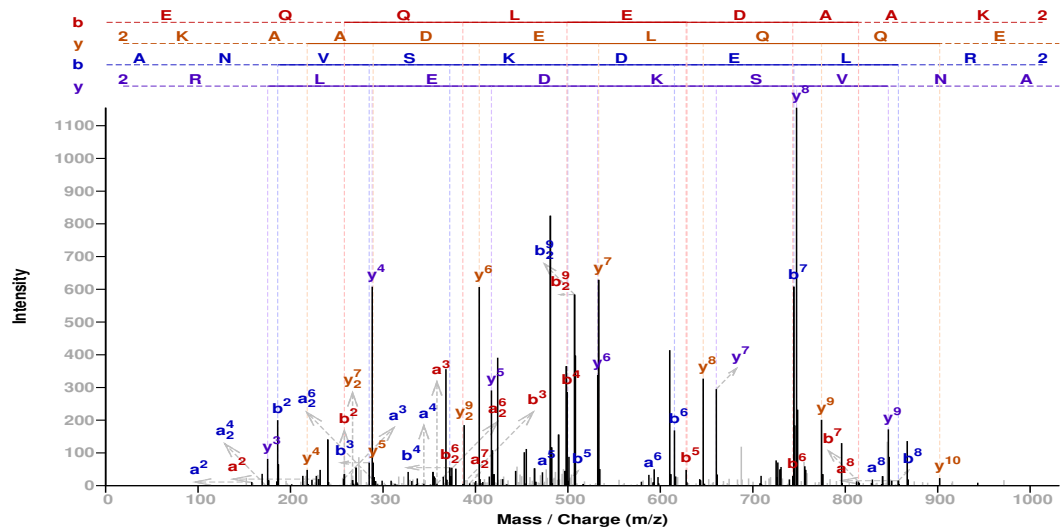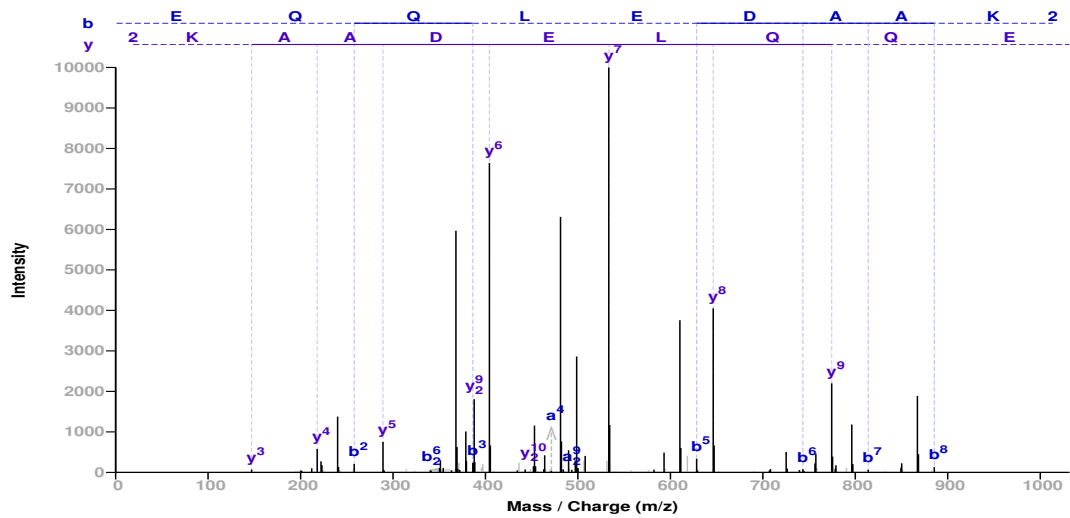



yeast0.Scan\_Number.2114 Precursor m/z: 480.264 cosine: 0.882  $\alpha$ : 0.670

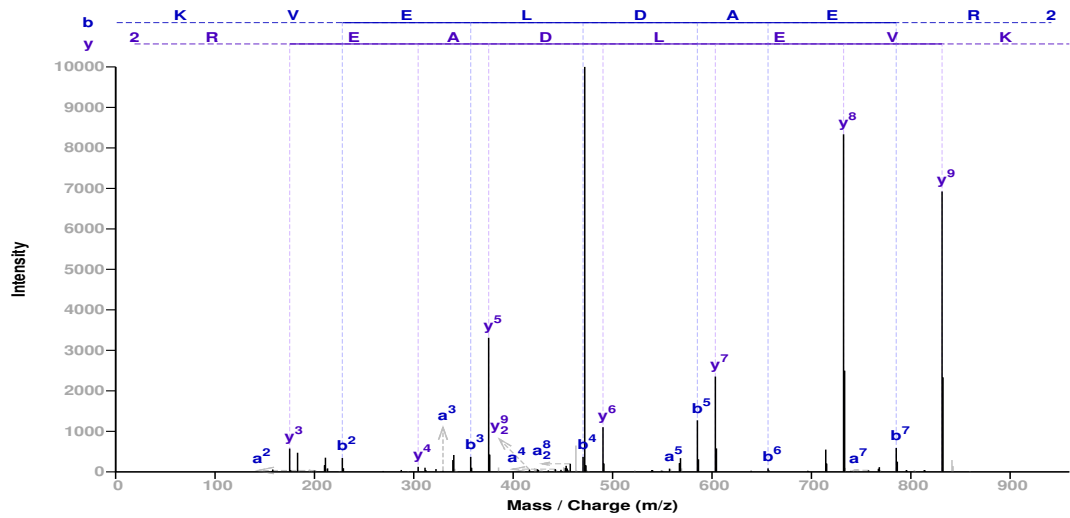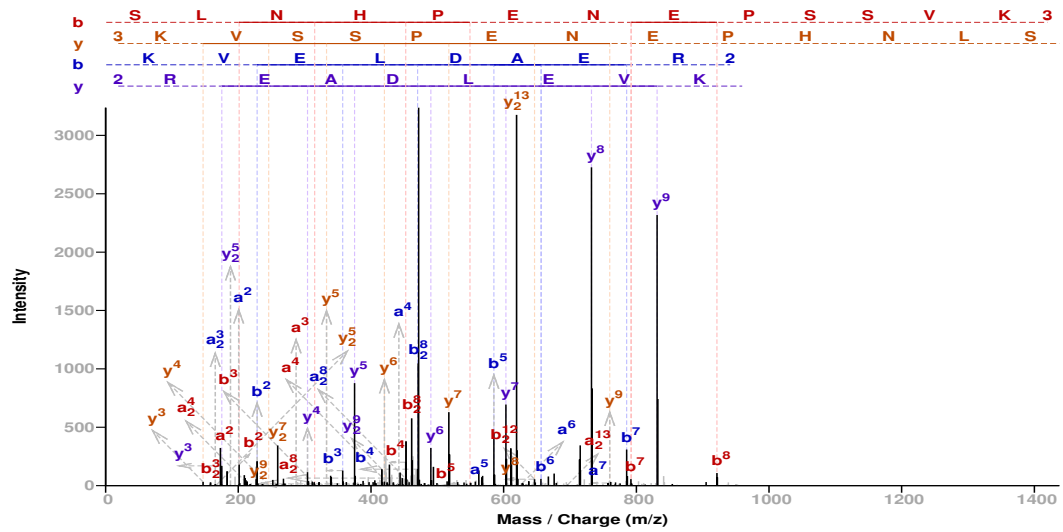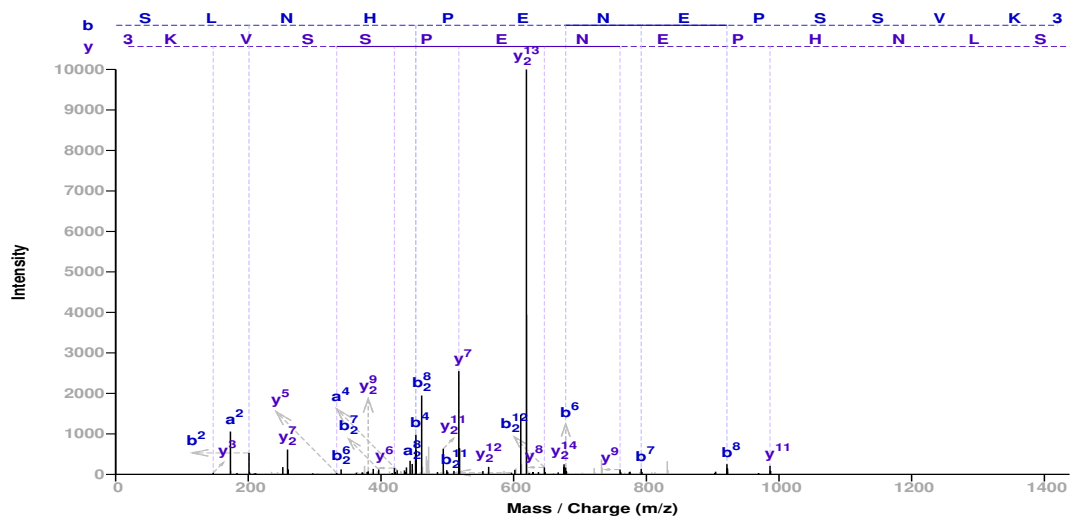

yeast0\_Scan\_Number\_5631 Precursor m/z: 435.305 cosine: 0.874  $\alpha$ : 0.667

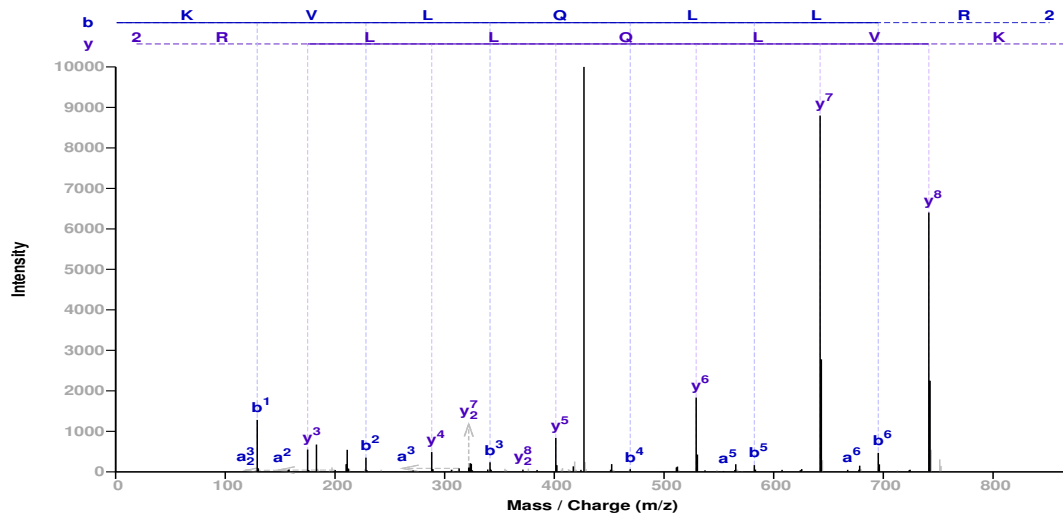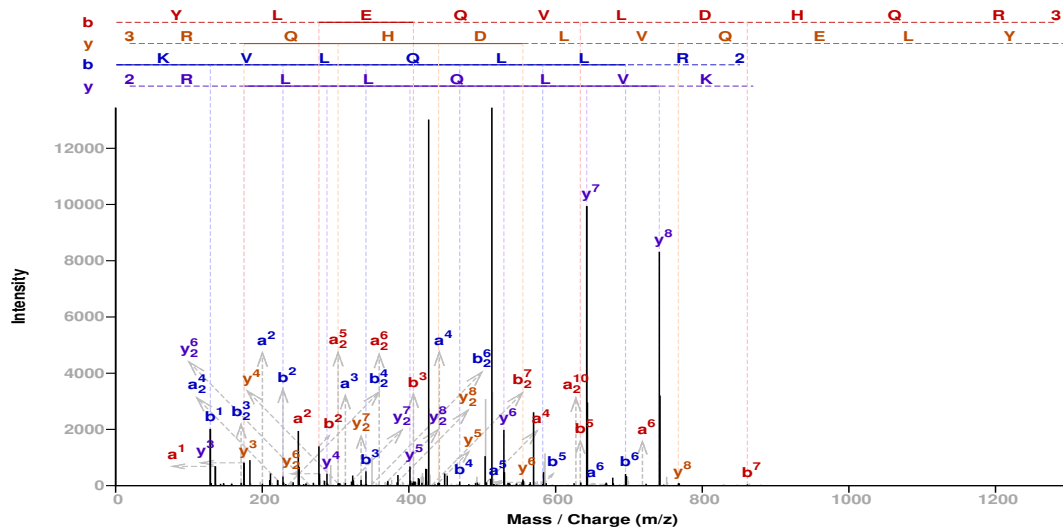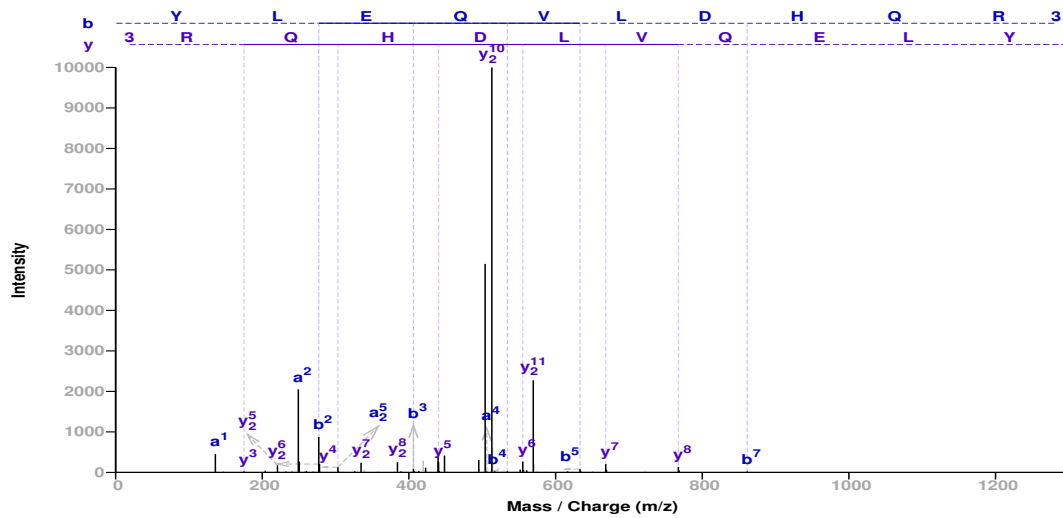

yeast0.Scan\_Number\_6616 Precursor m/z: 413.272 cosine: 0.769  $\alpha$ : 0.658

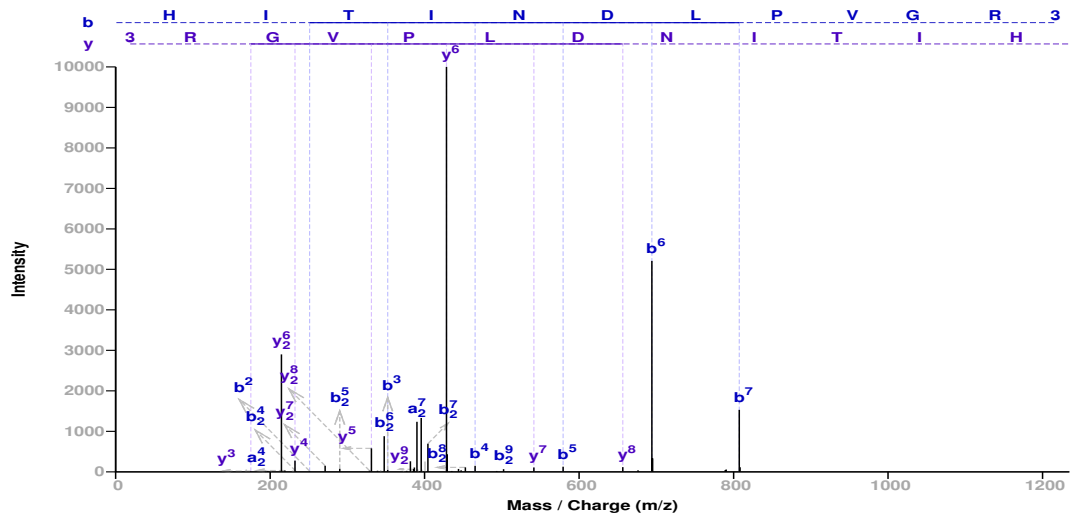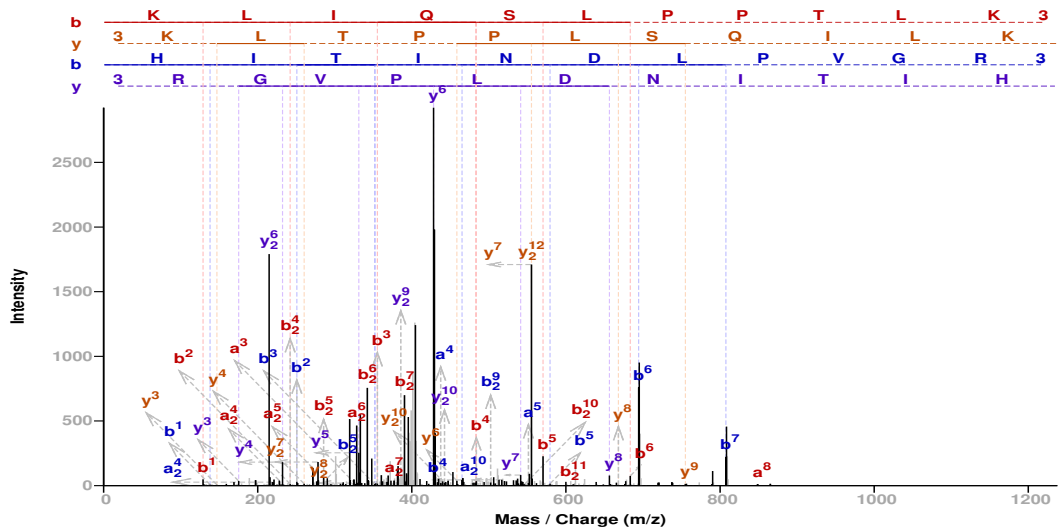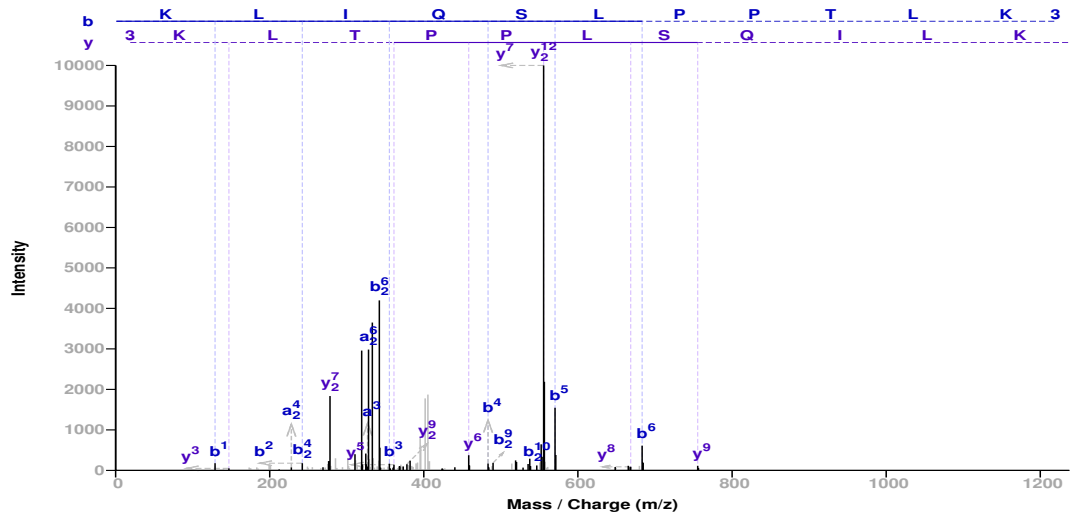

yeast0.Scan\_Number\_4990 Precursor m/z: 472.761 cosine: 0.882  $\alpha$ : 0.653

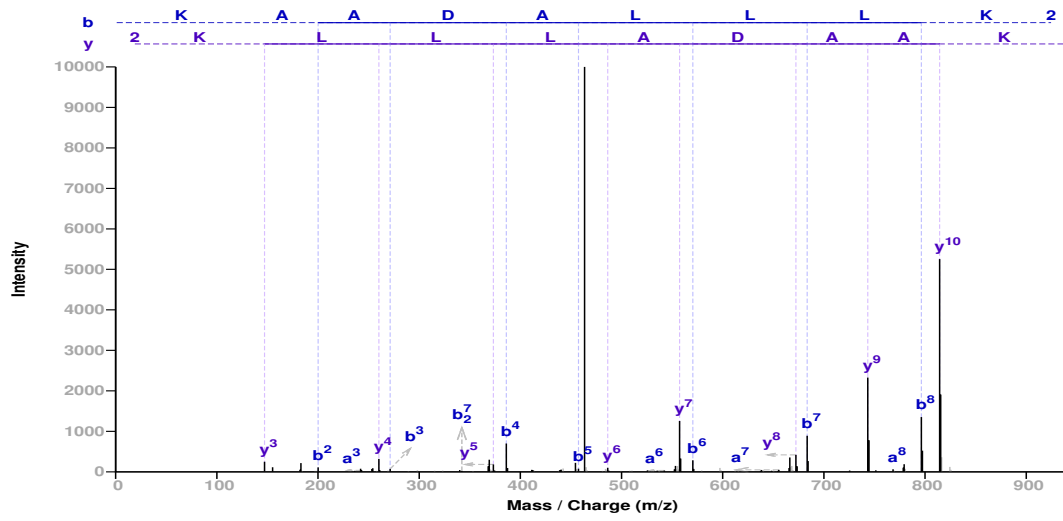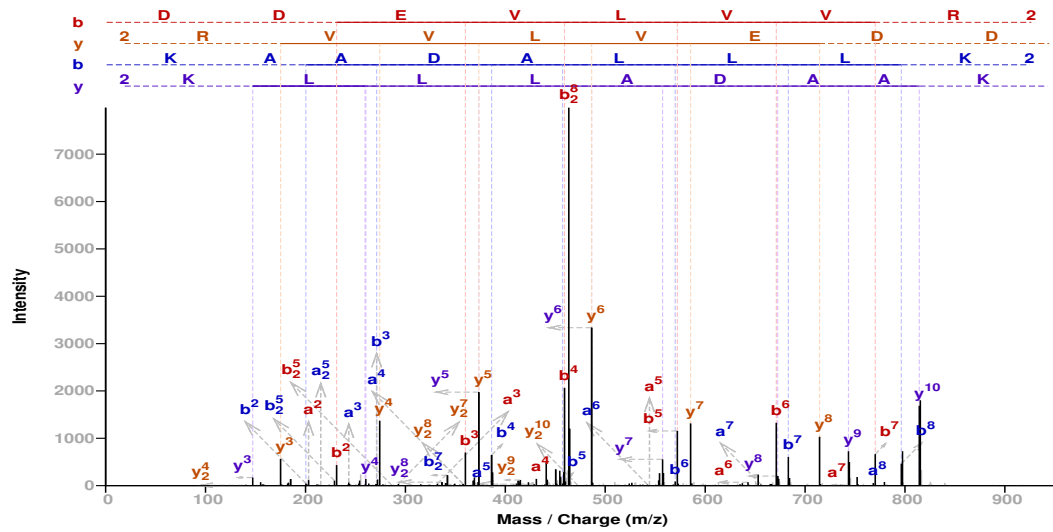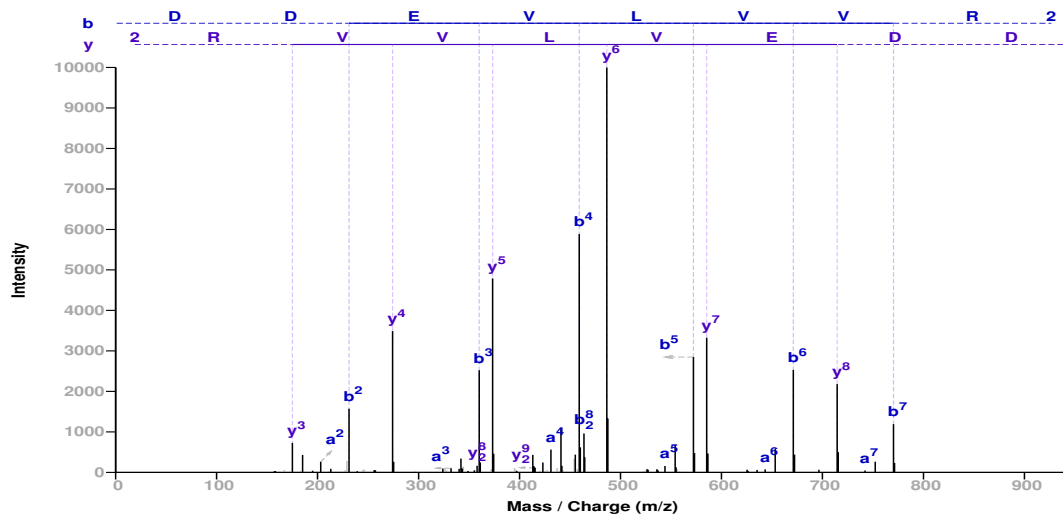

yeast0\_Scan\_Number\_6050 Precursor m/z: 557.301 cosine: 0.750  $\alpha$ : 0.649

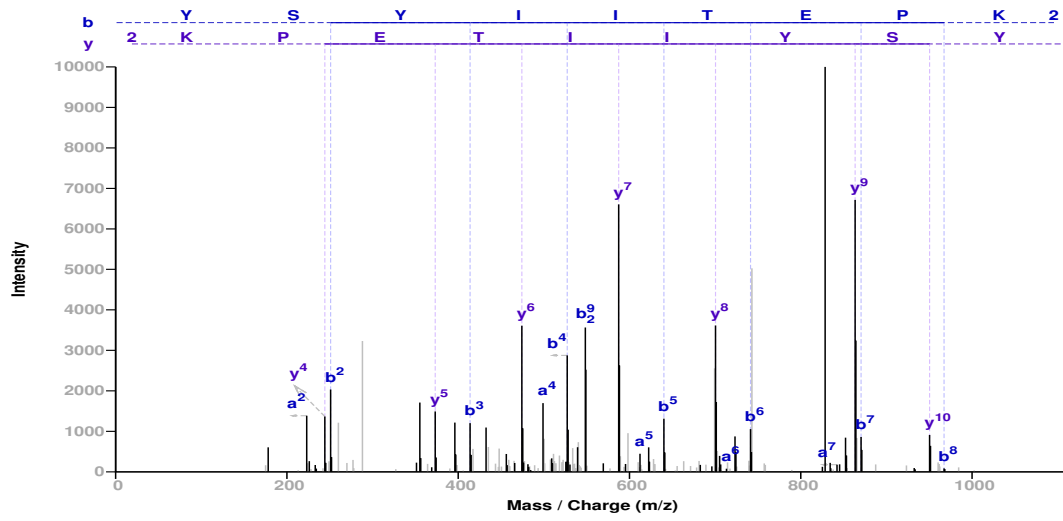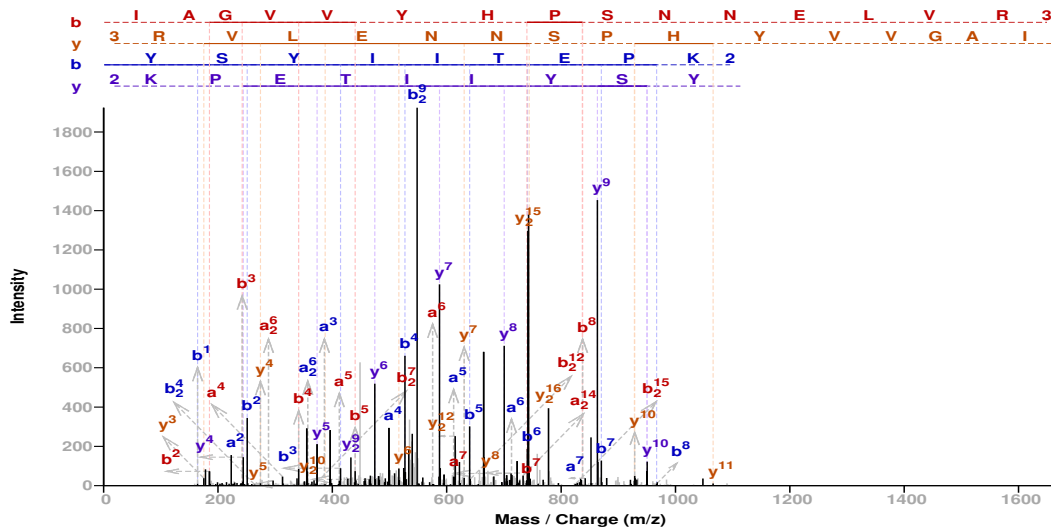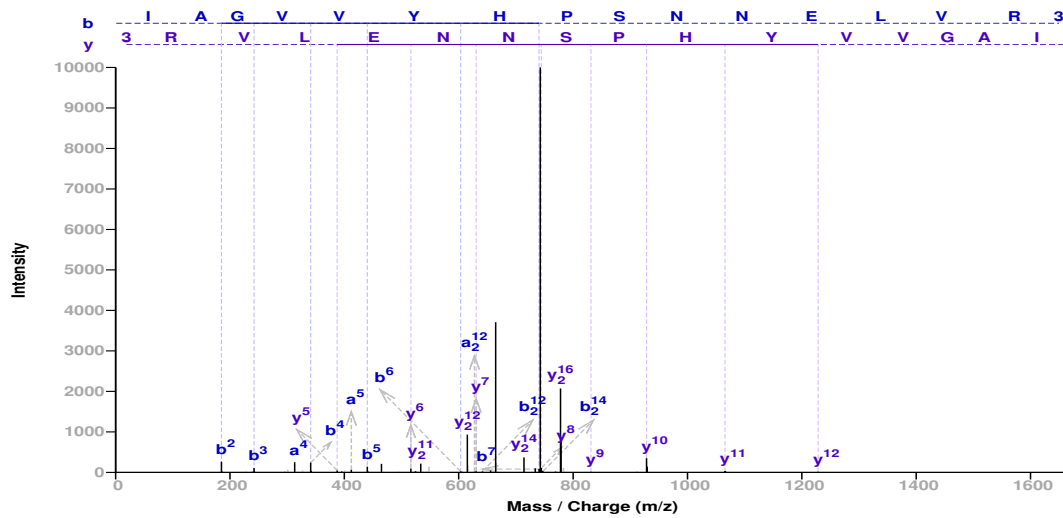

yeast0\_Scan\_Number\_7308 Precursor m/z: 730.877 cosine: 0.881  $\alpha$ : 0.649

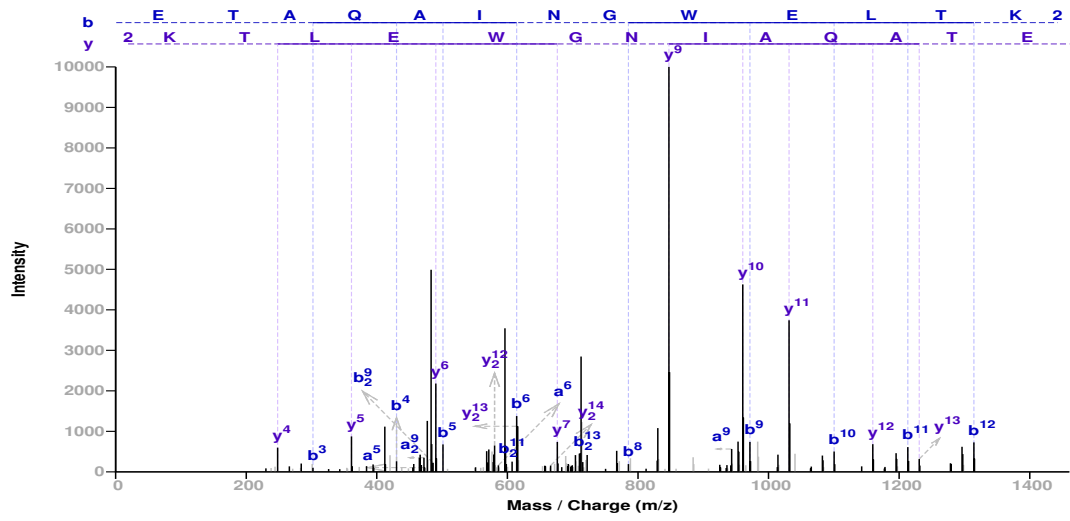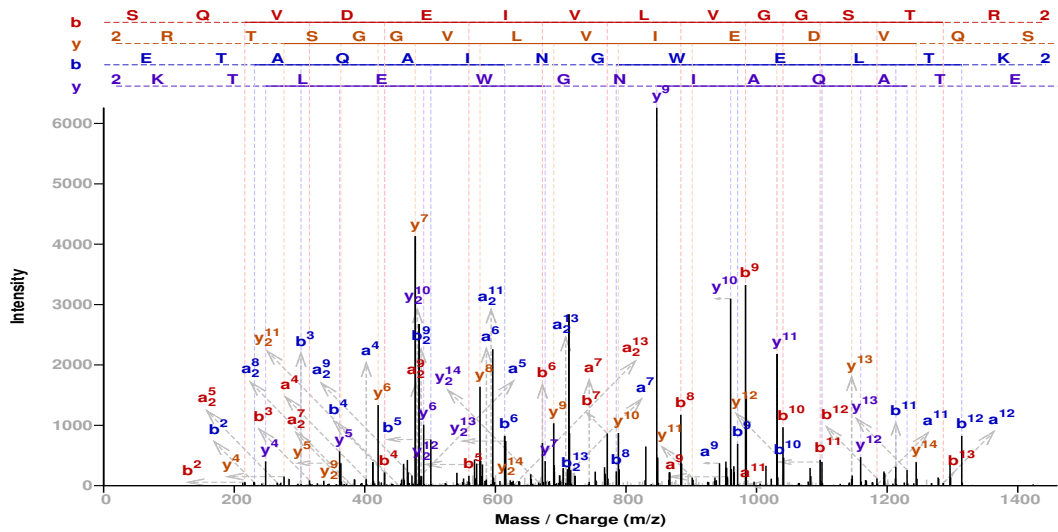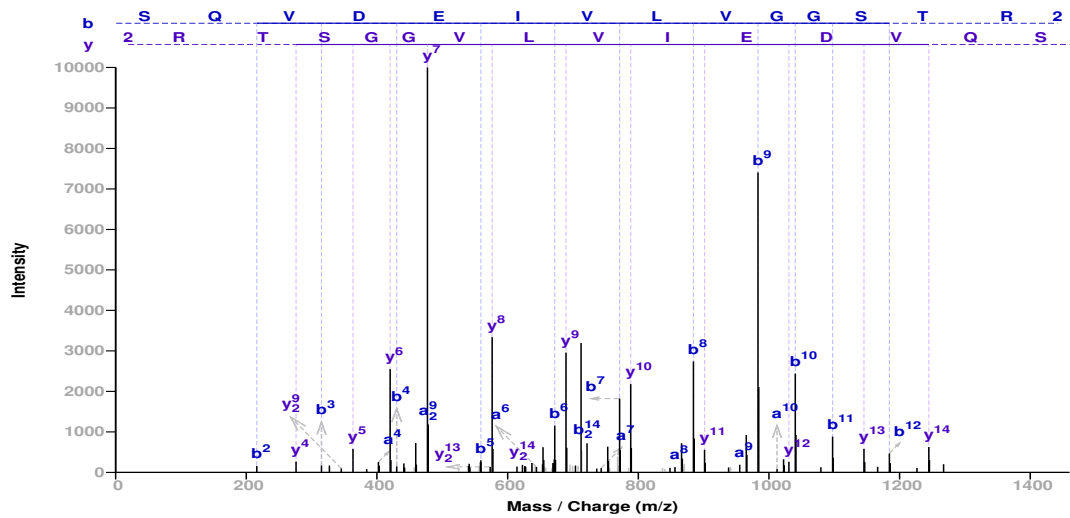

yeast0.Scan\_Number\_5705 Precursor m/z: 506.260 cosine: 0.762  $\alpha$ : 0.646

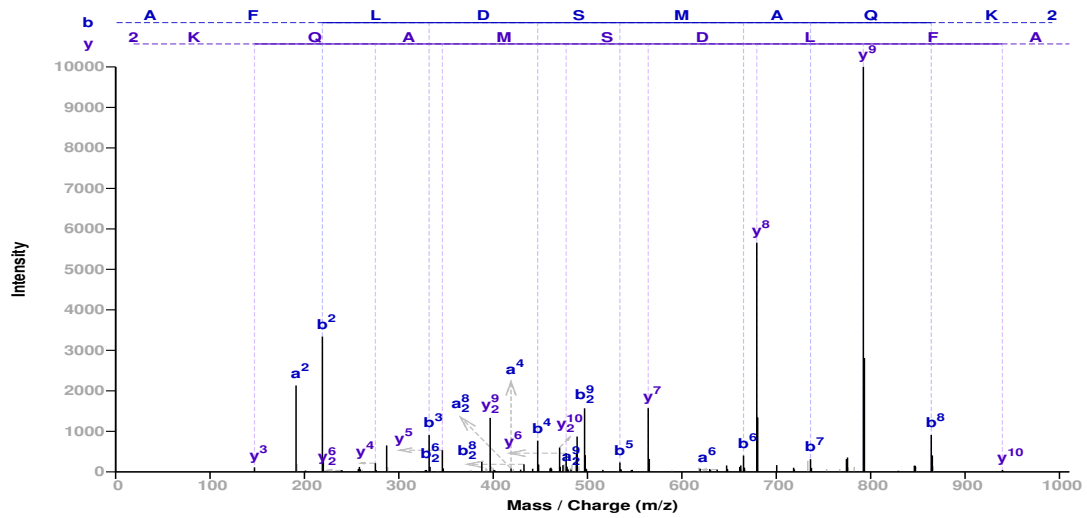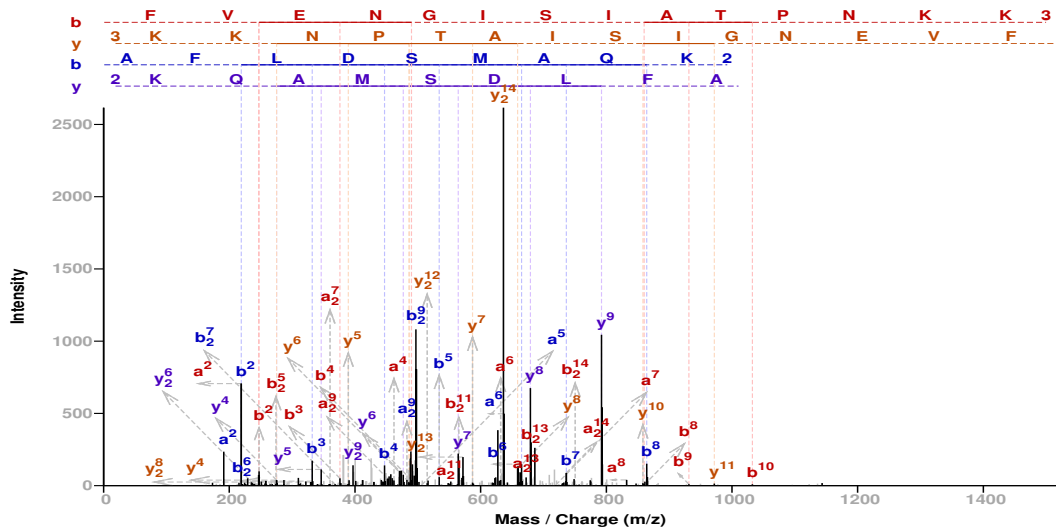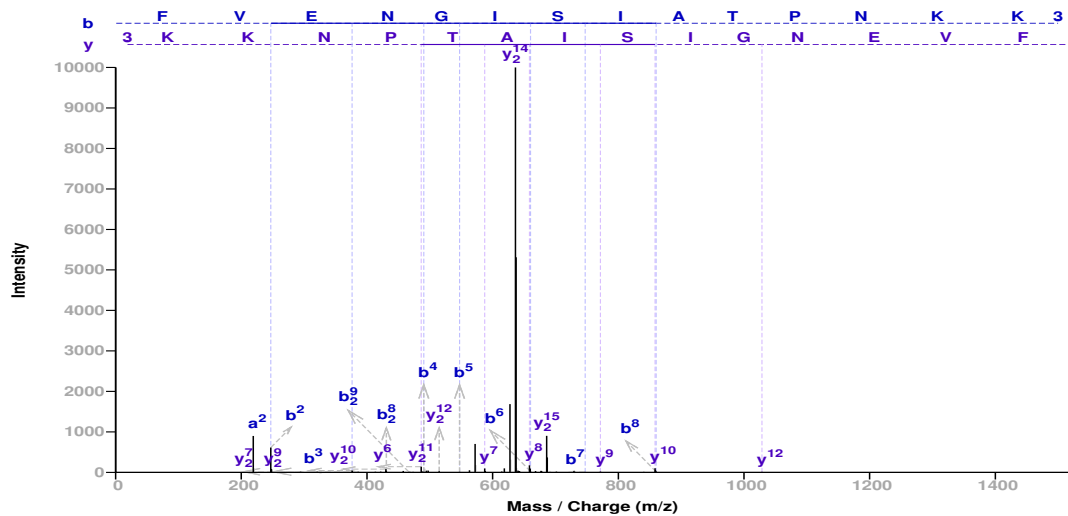

yeast0\_Scan\_Number\_6217 Precursor m/z: 428.901 cosine: 0.747  $\alpha$ : 0.640

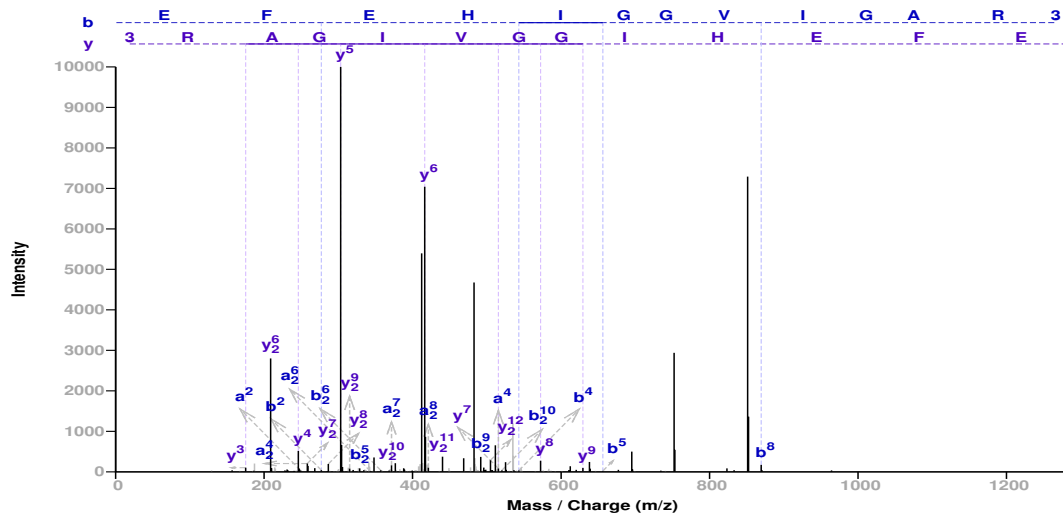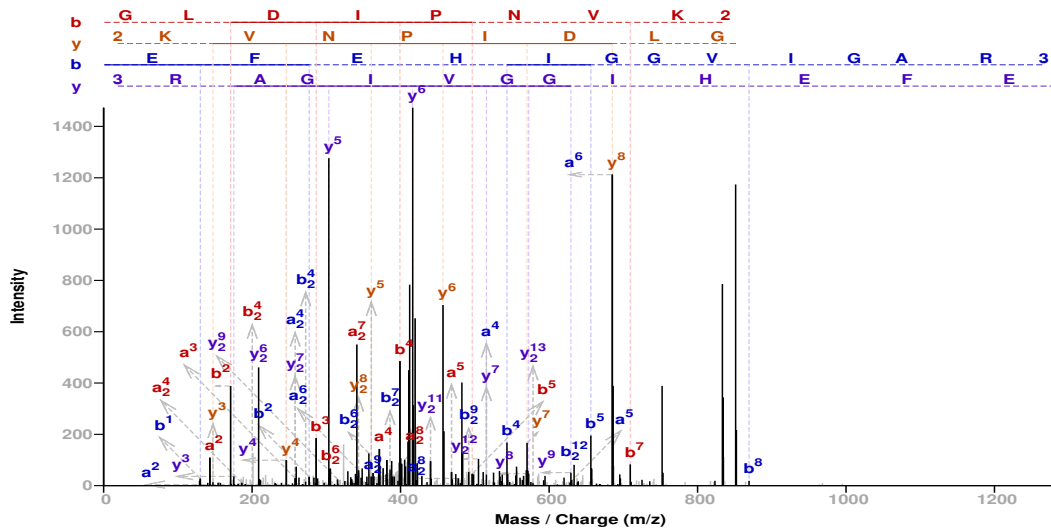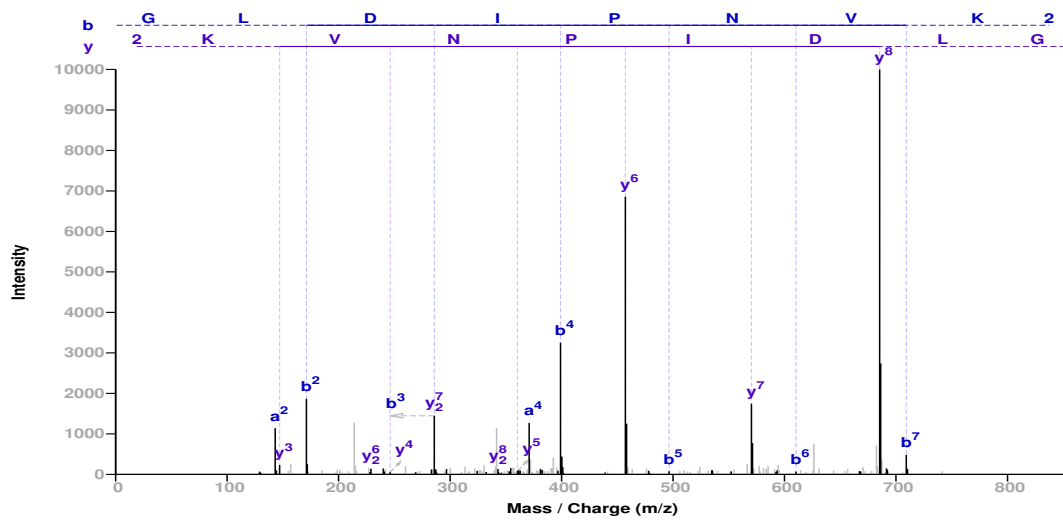



yeast0.Scan\_Number\_2476 Precursor m/z: 502.762 cosine: 0.768  $\alpha$ : 0.637

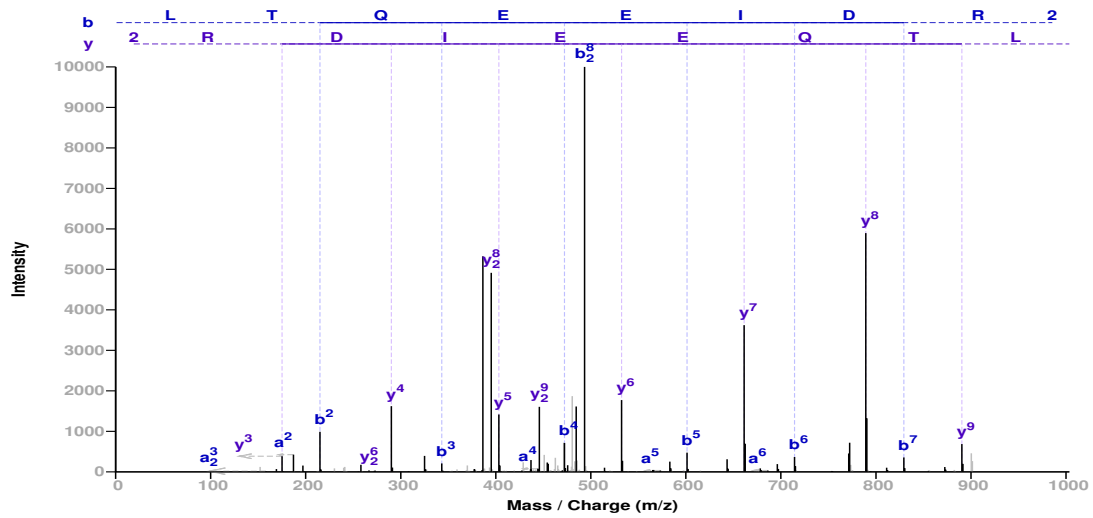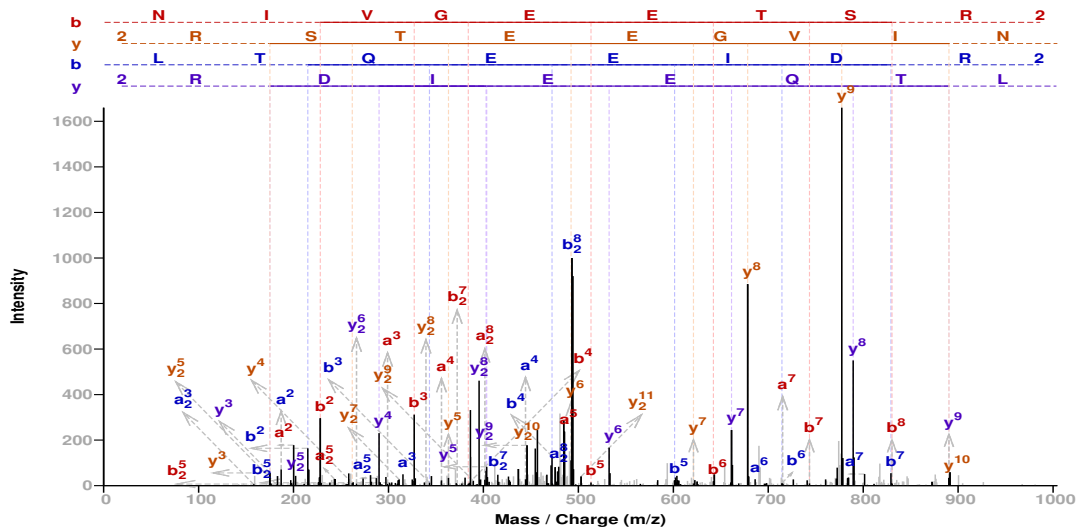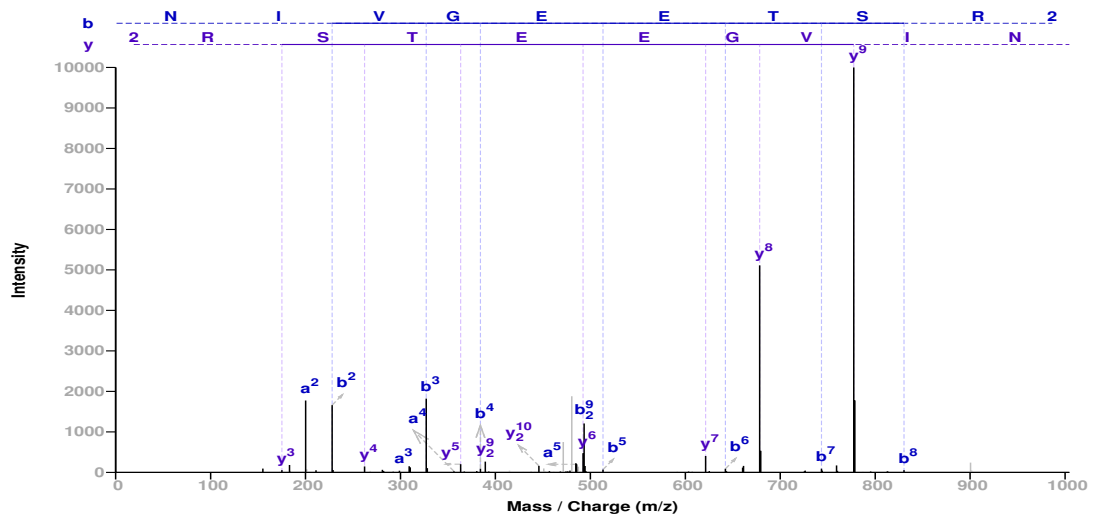



yeast0.Scan\_Number\_2671 Precursor m/z: 479.277 cosine: 0.764  $\alpha$ : 0.635

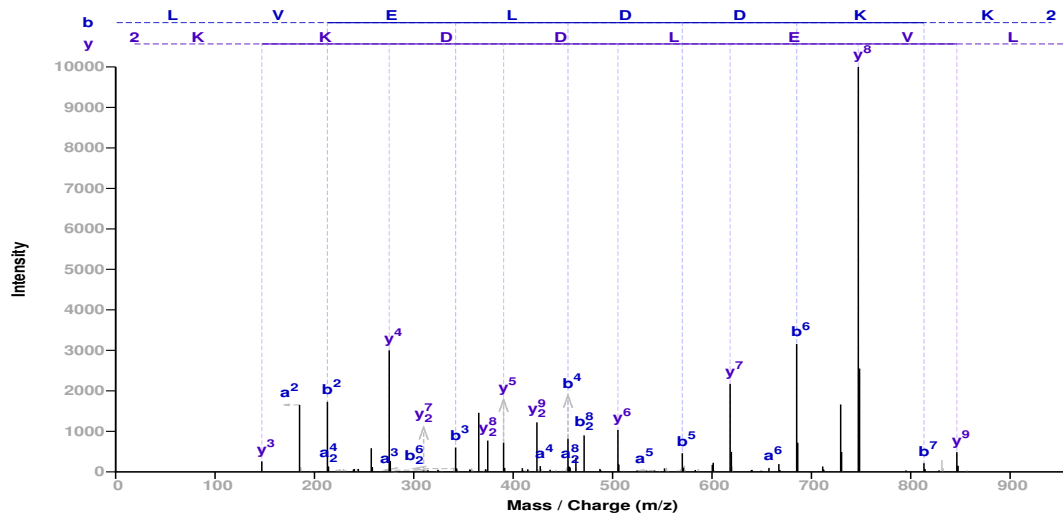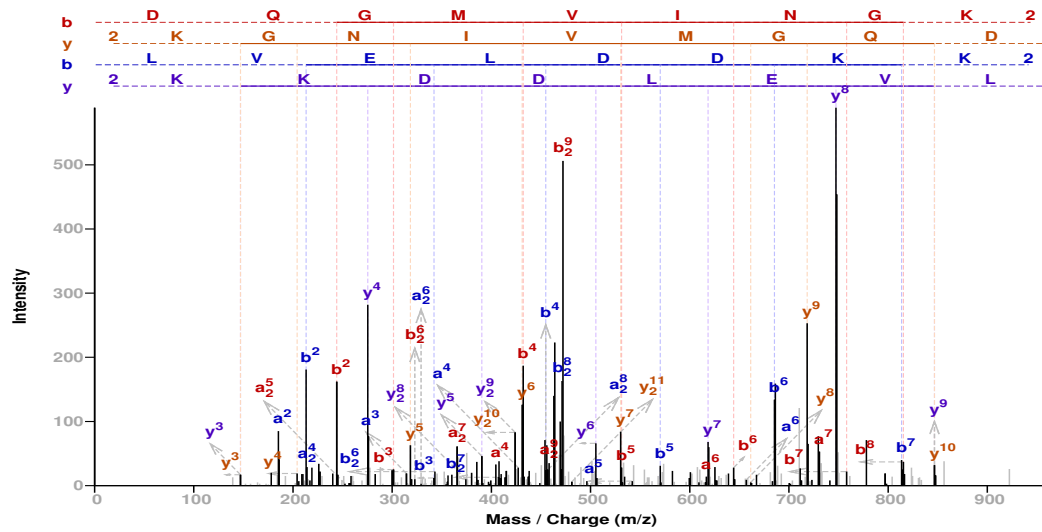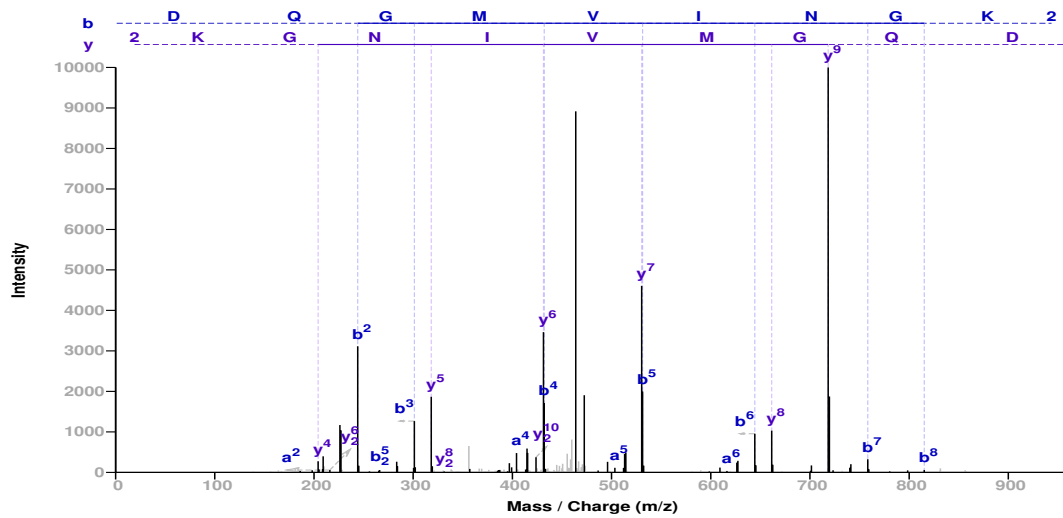

yeast0\_Scan\_Number\_6828 Precursor m/z: 540.000 cosine: 0.851  $\alpha$ : 0.635

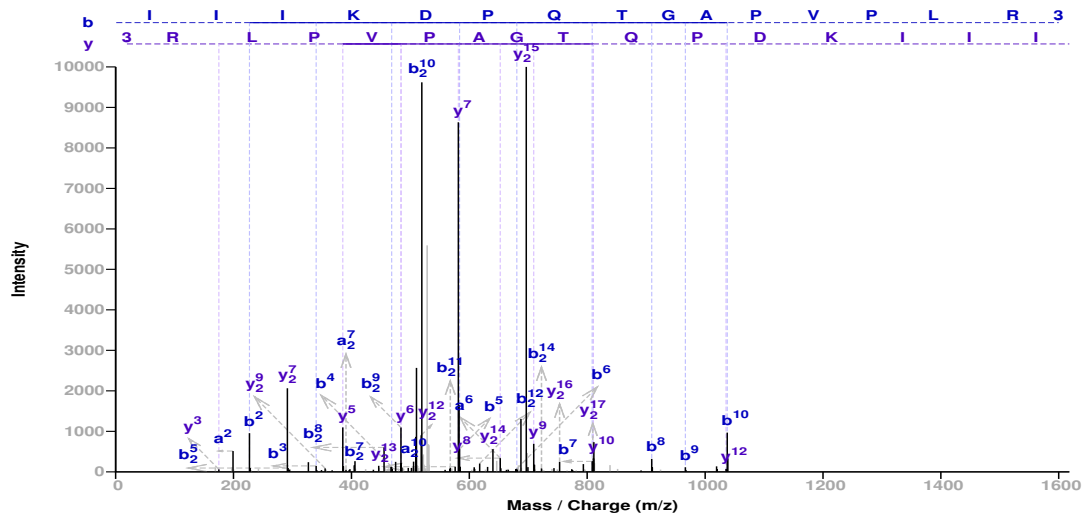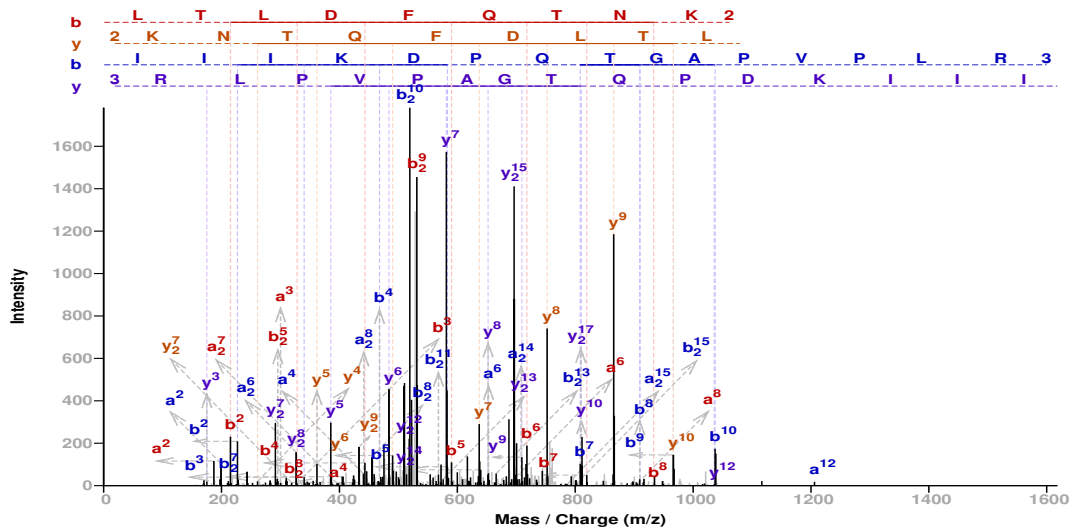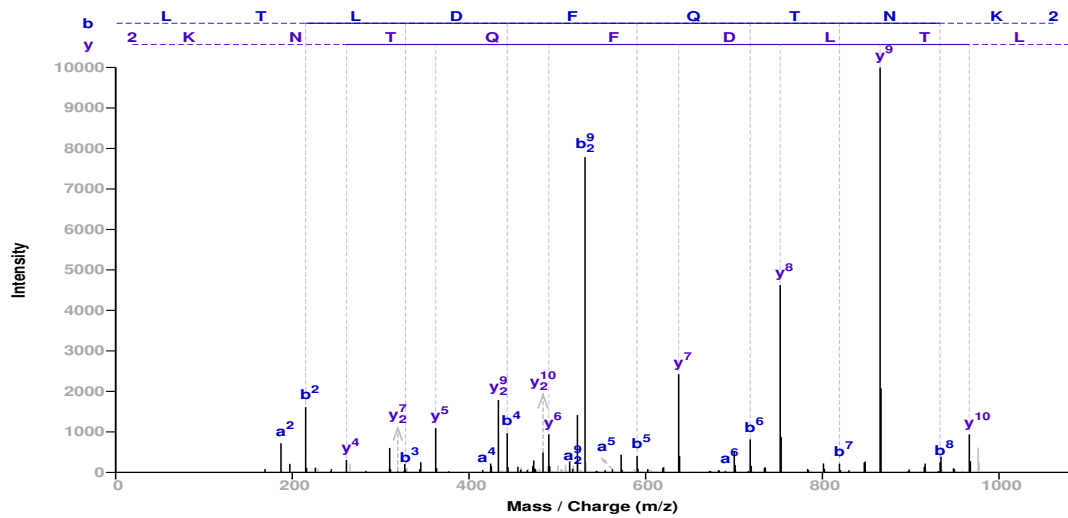

yeast0\_Scan\_Number\_5761 Precursor m/z: 736.901 cosine: 0.778  $\alpha$ : 0.633

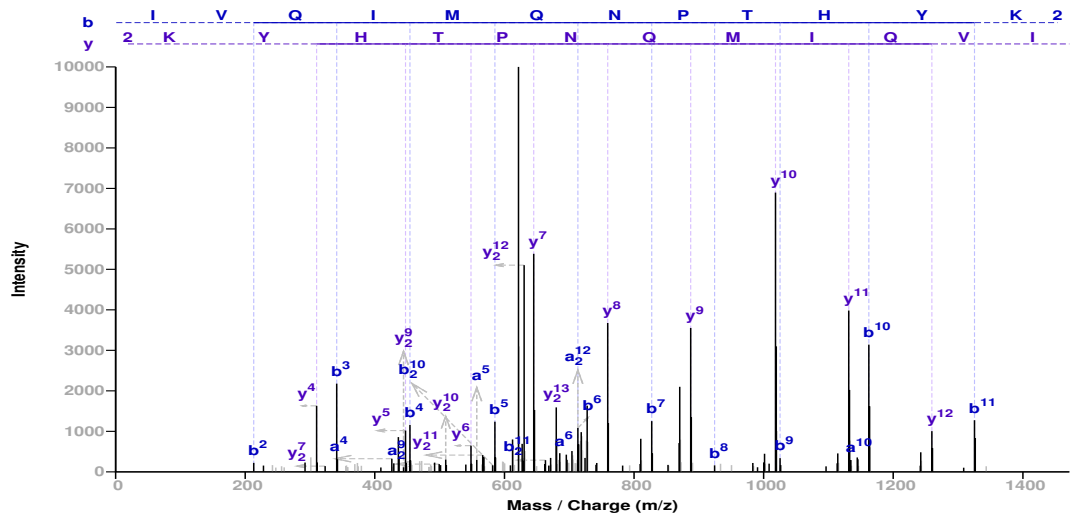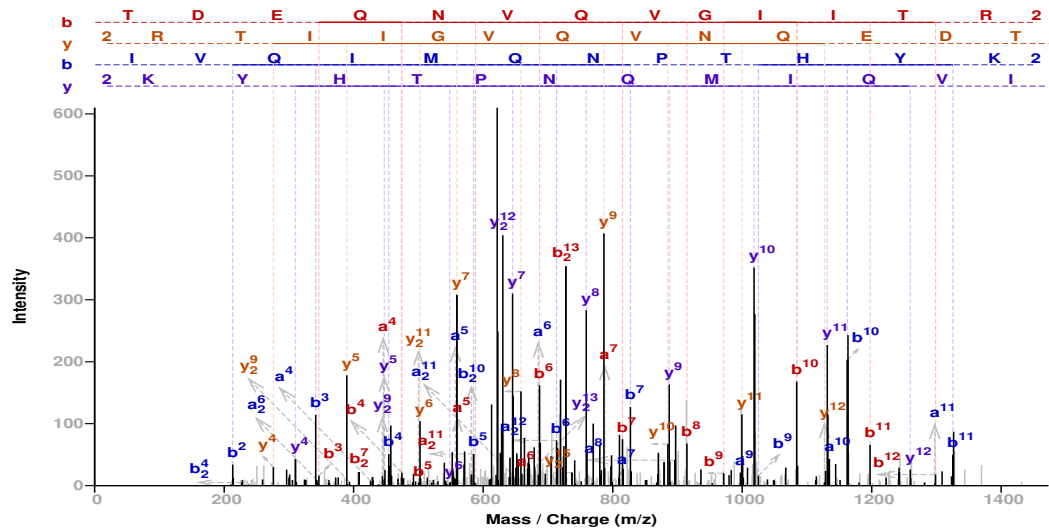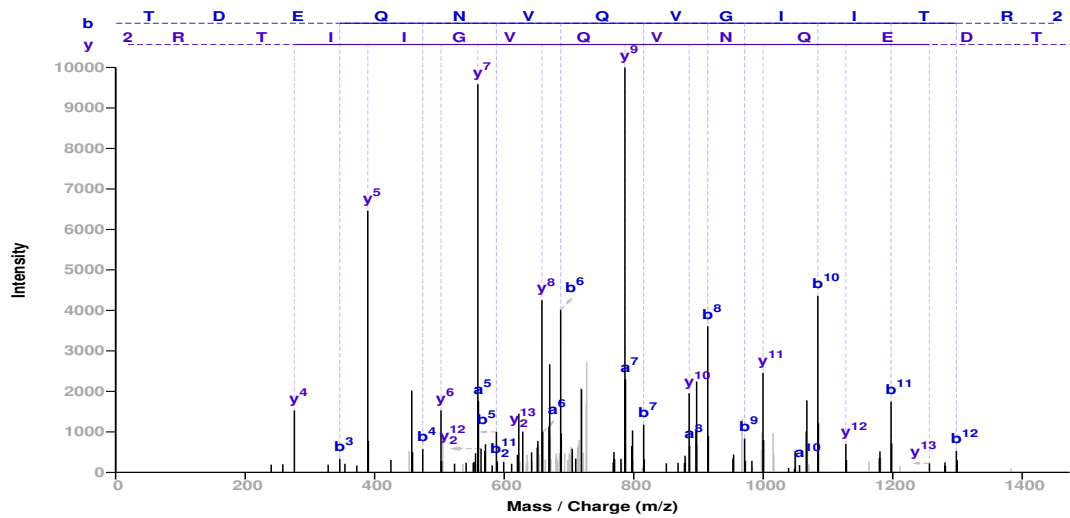

yeast0\_Scan\_Number\_529 Precursor m/z: 454.258 cosine: 0.823  $\alpha$ : 0.627

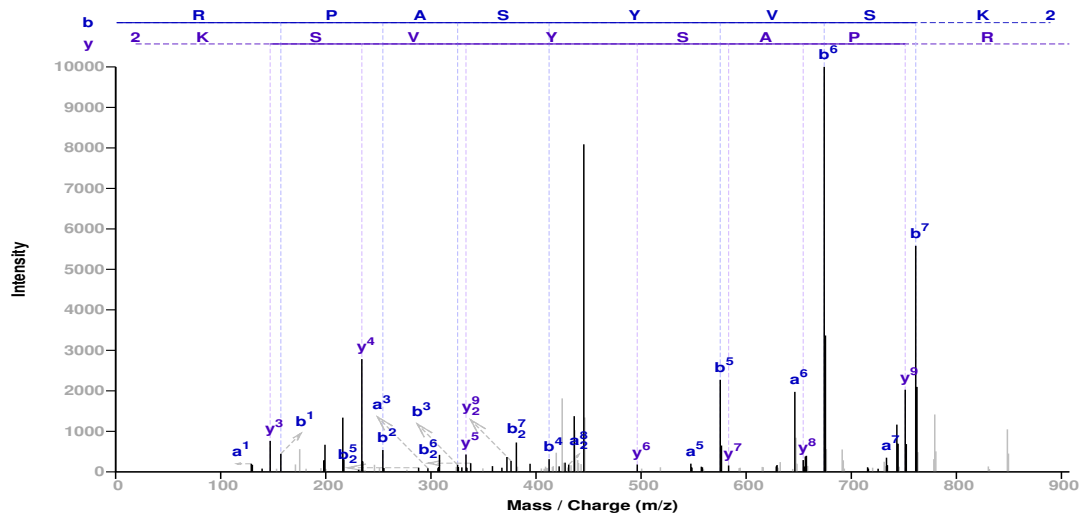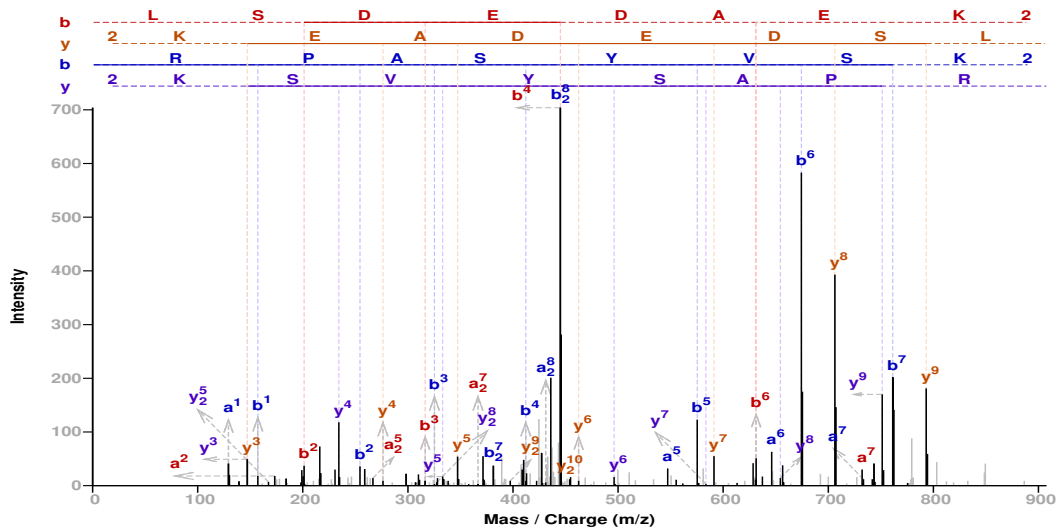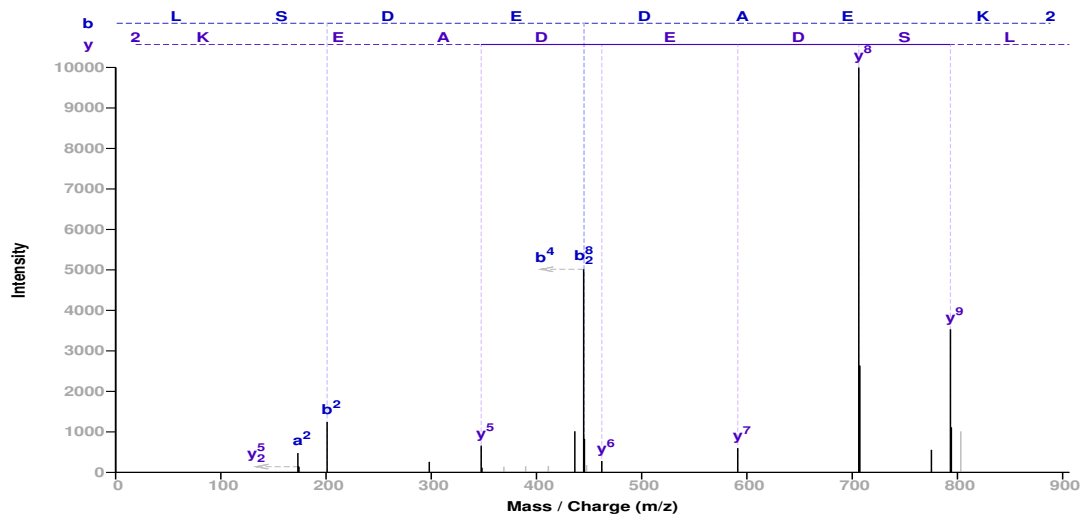

yeast0\_Scan\_Number\_1539 Precursor m/z: 445.243 cosine: 0.911  $\alpha$ : 0.619

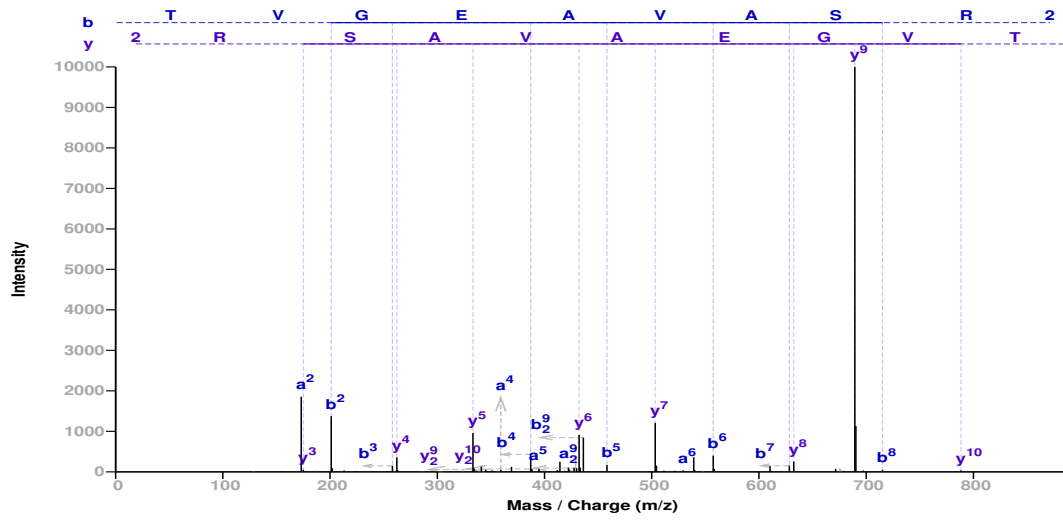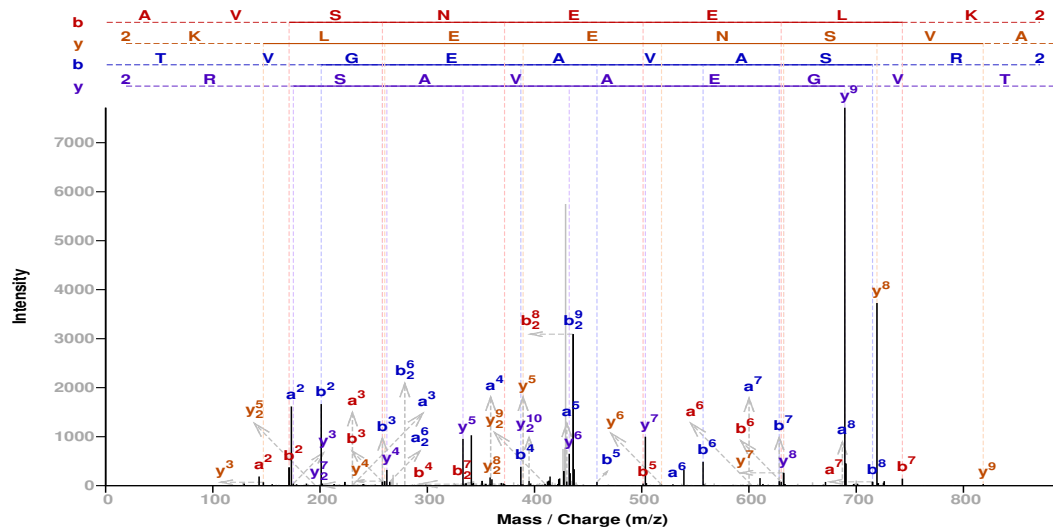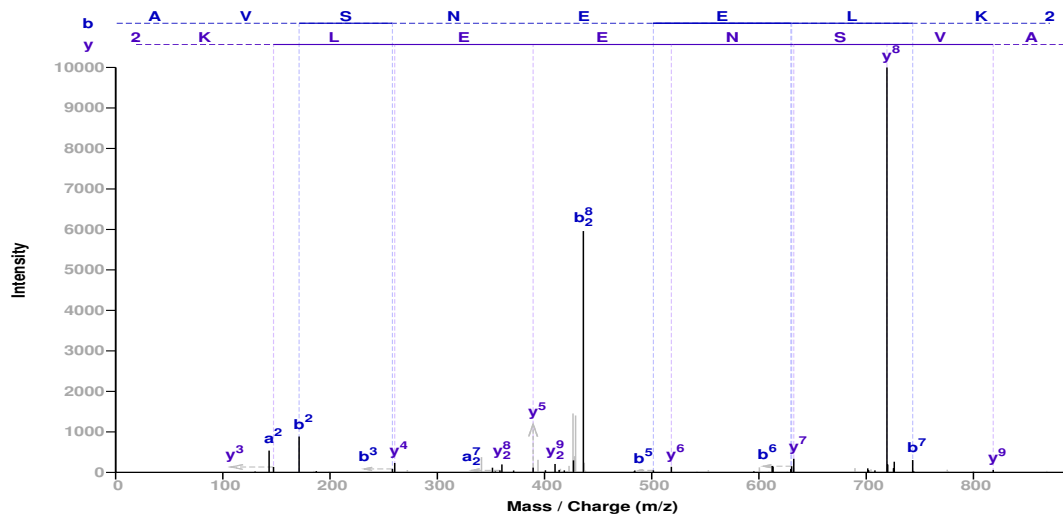

yeast0.Scan\_Number\_7344 Precursor m/z: 594.831 cosine: 0.746  $\alpha$ : 0.612

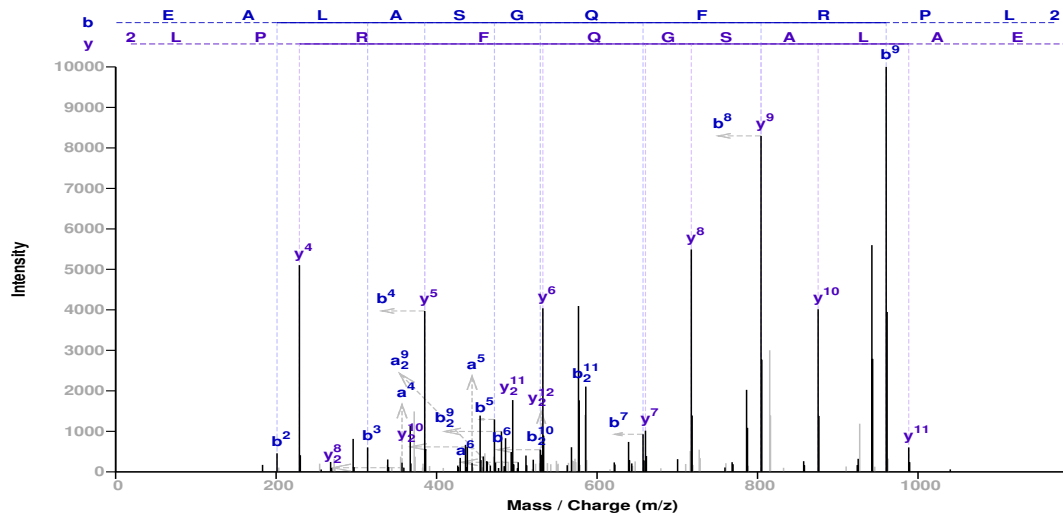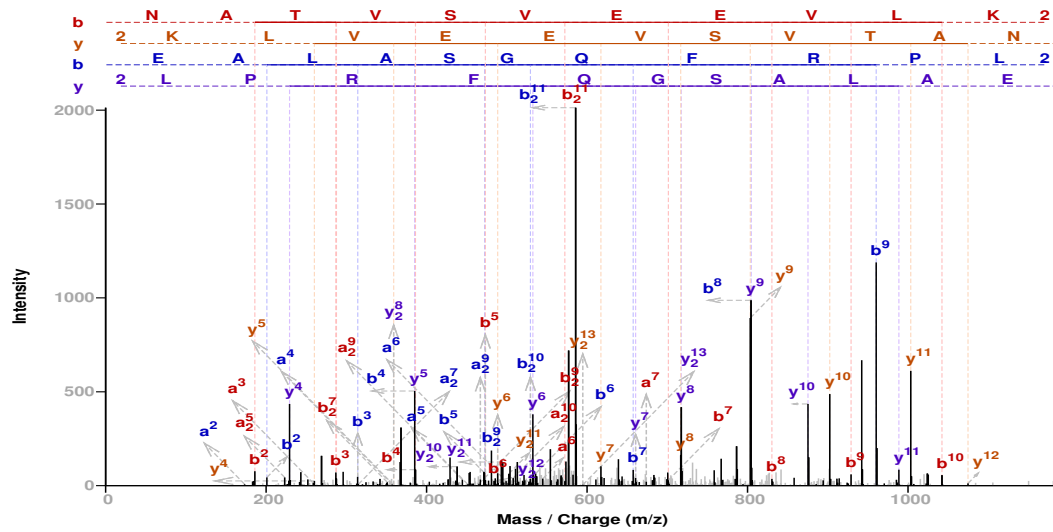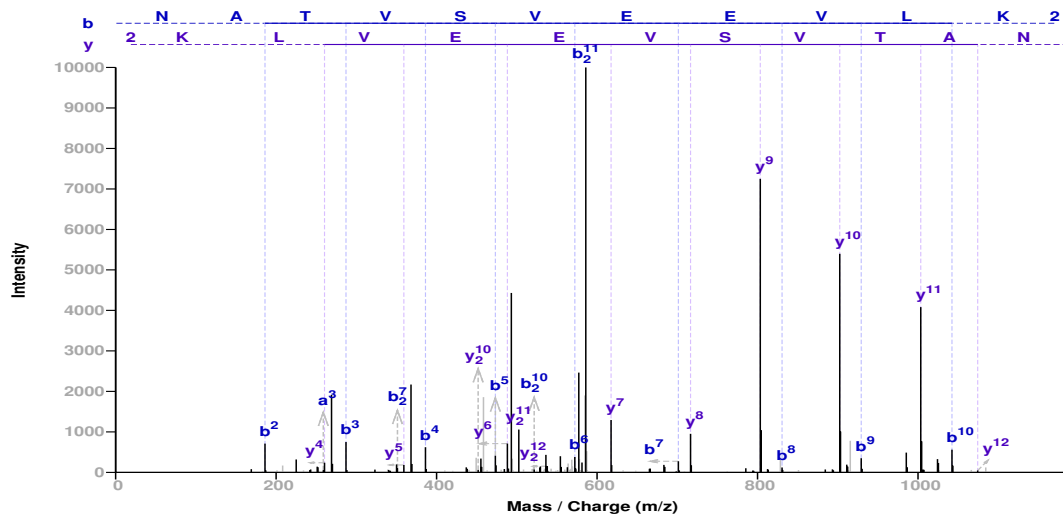



yeast0.Scan\_Number\_6261 Precursor m/z: 626.831 cosine: 0.823  $\alpha$ : 0.611

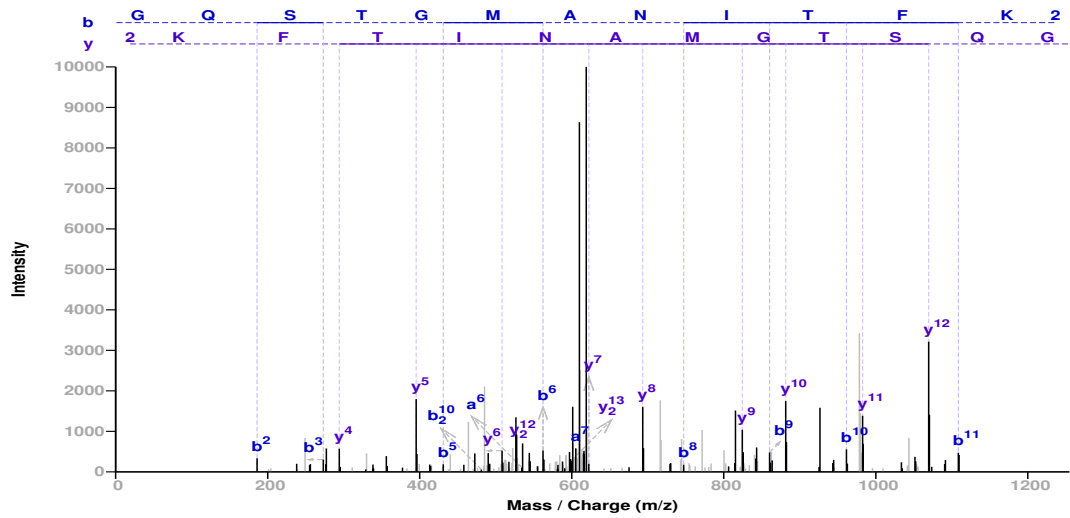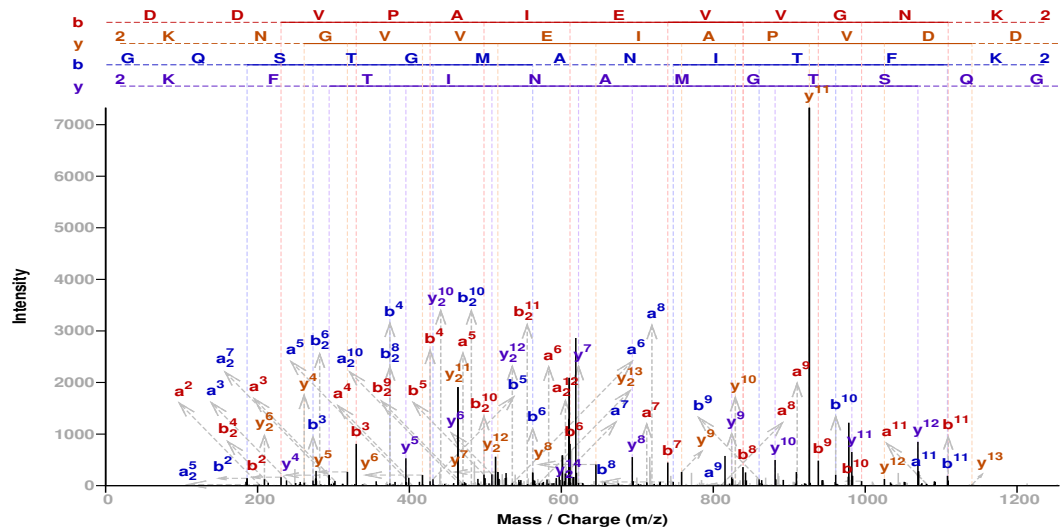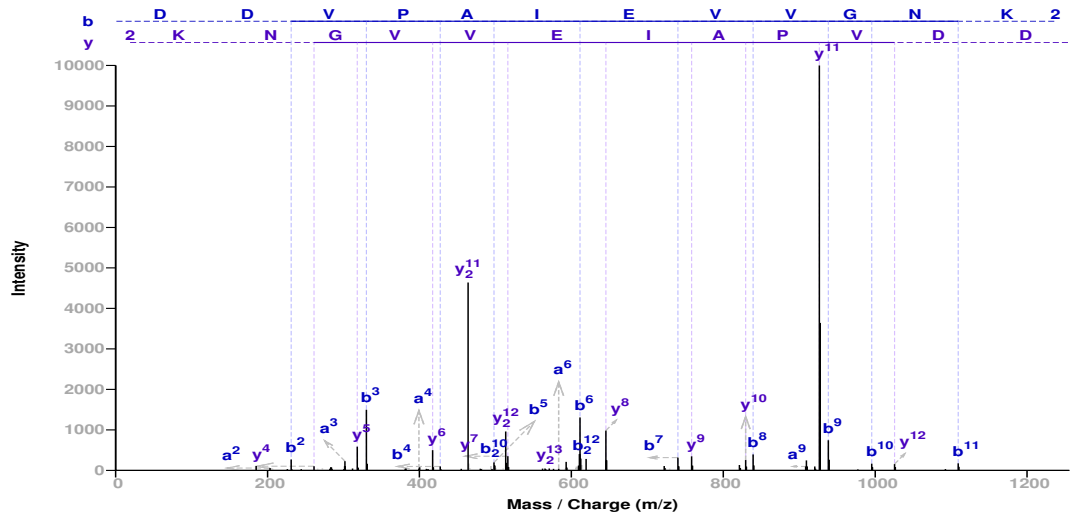

yeast0.Scan\_Number\_6876 Precursor m/z: 597.817 cosine: 0.725  $\alpha$ : 0.607

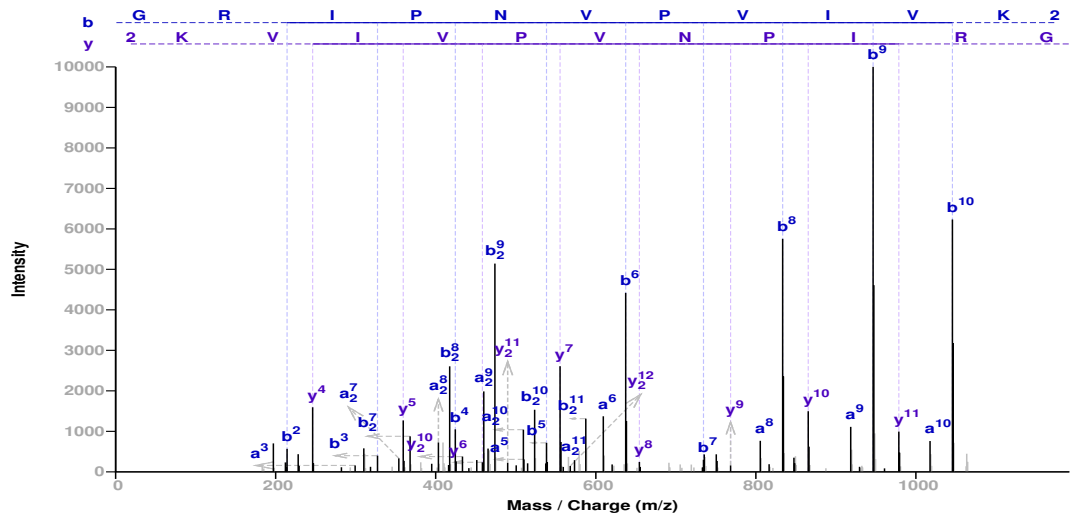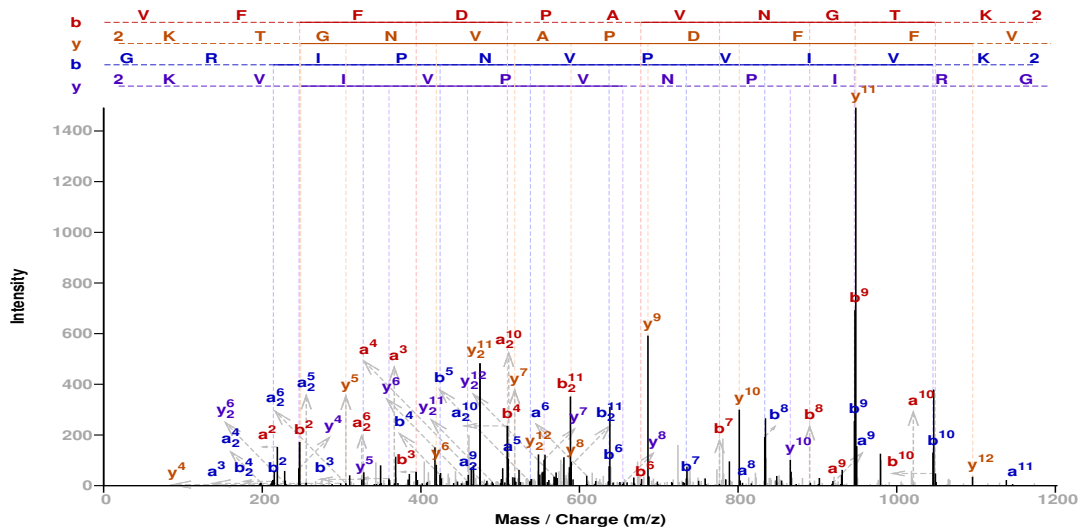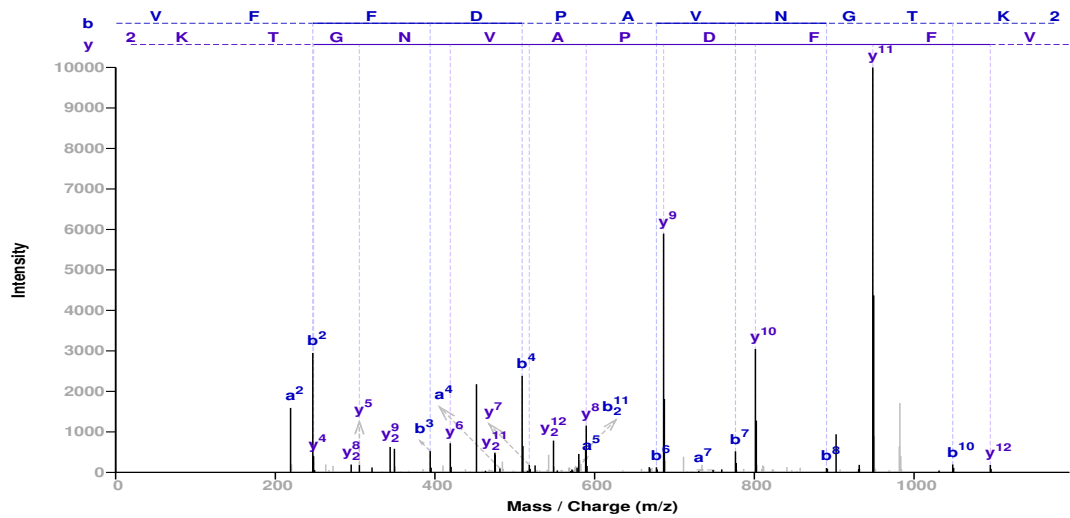

yeast0\_Scan\_Number\_6556 Precursor m/z: 610.827 cosine: 0.759  $\alpha$ : 0.607

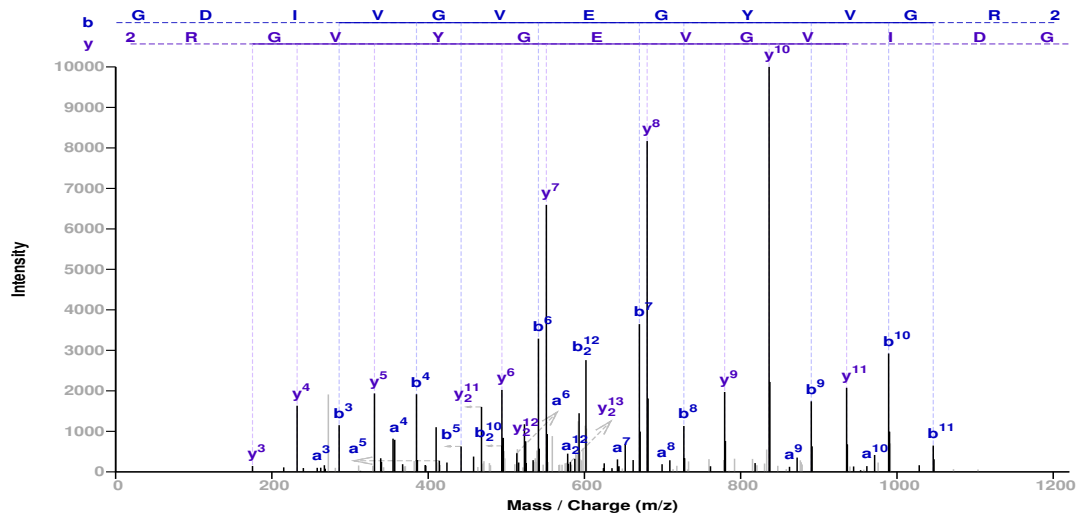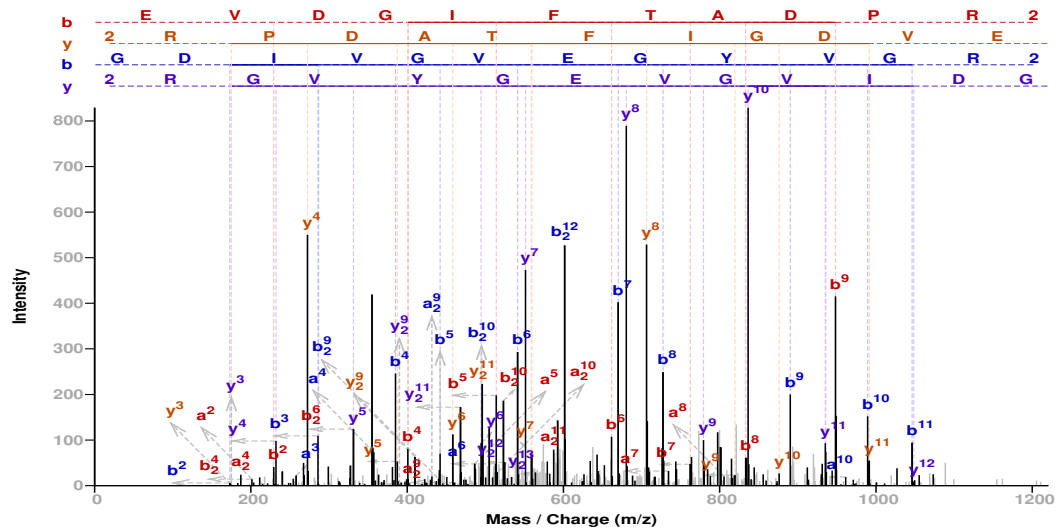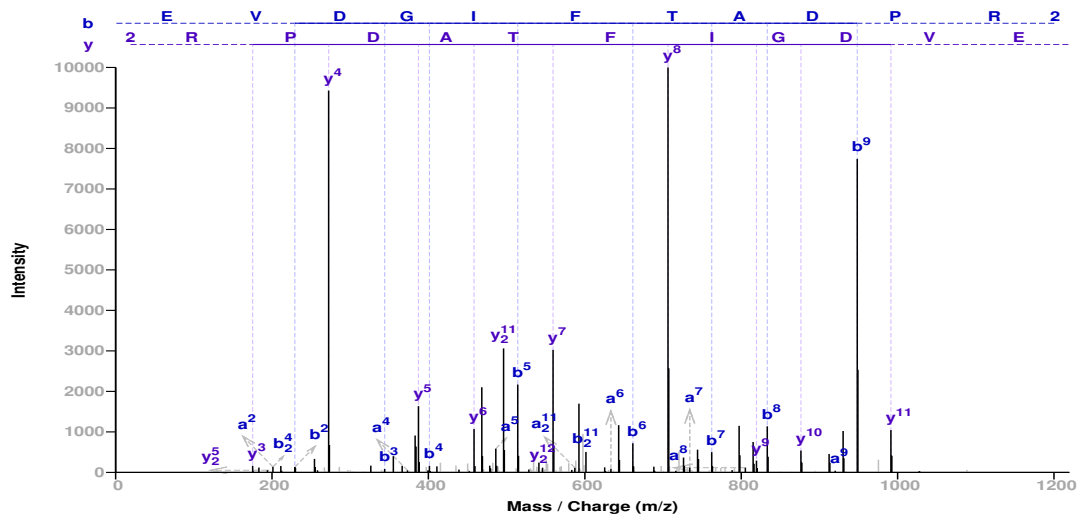

yeast0\_Scan\_Number\_3280 Precursor m/z: 530.317 cosine: 0.788  $\alpha$ : 0.606

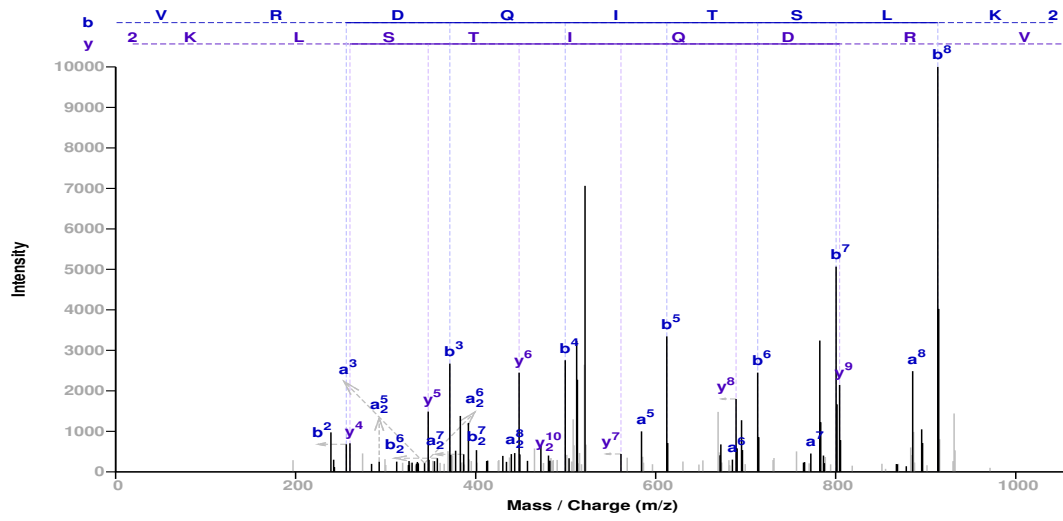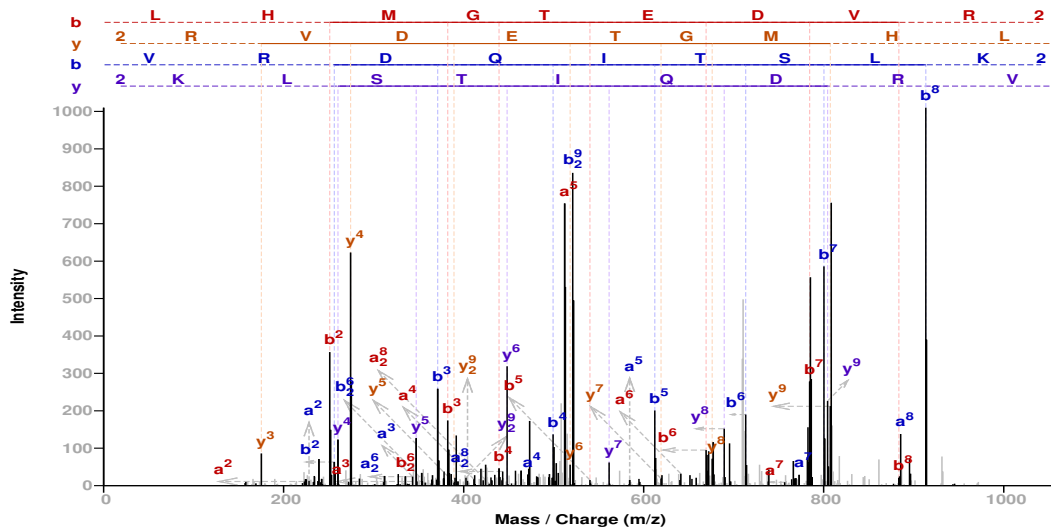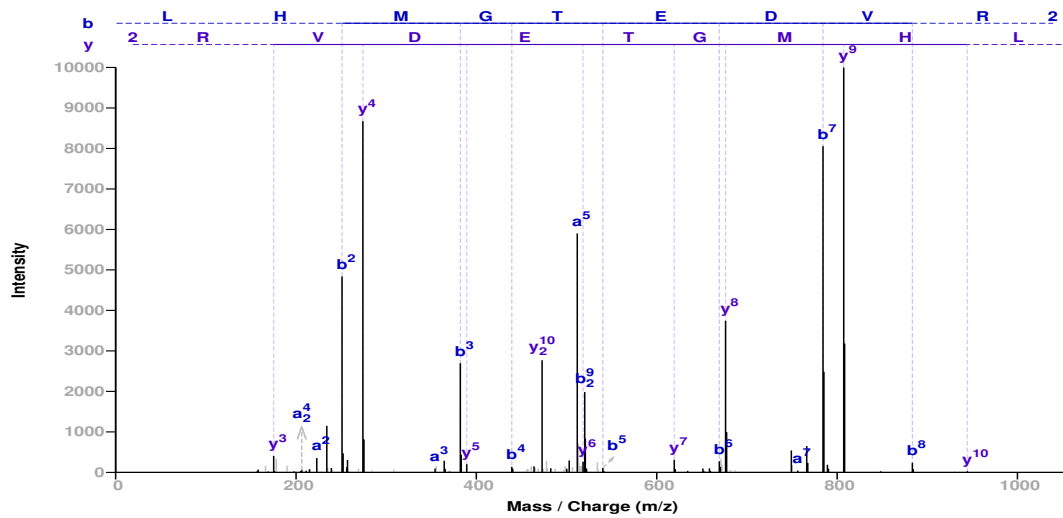

yeast0.Scan\_Number\_4783 Precursor m/z: 415.775 cosine: 0.724  $\alpha$ : 0.606

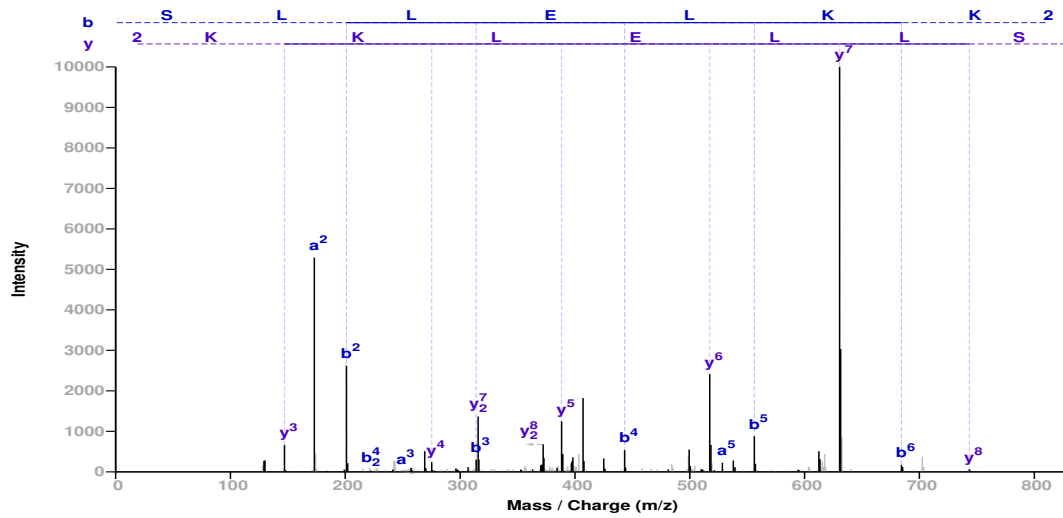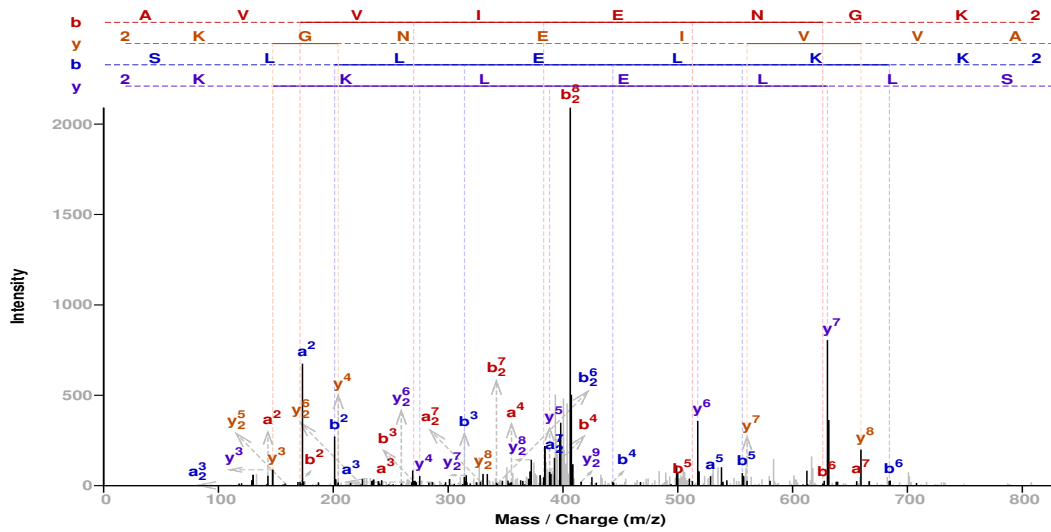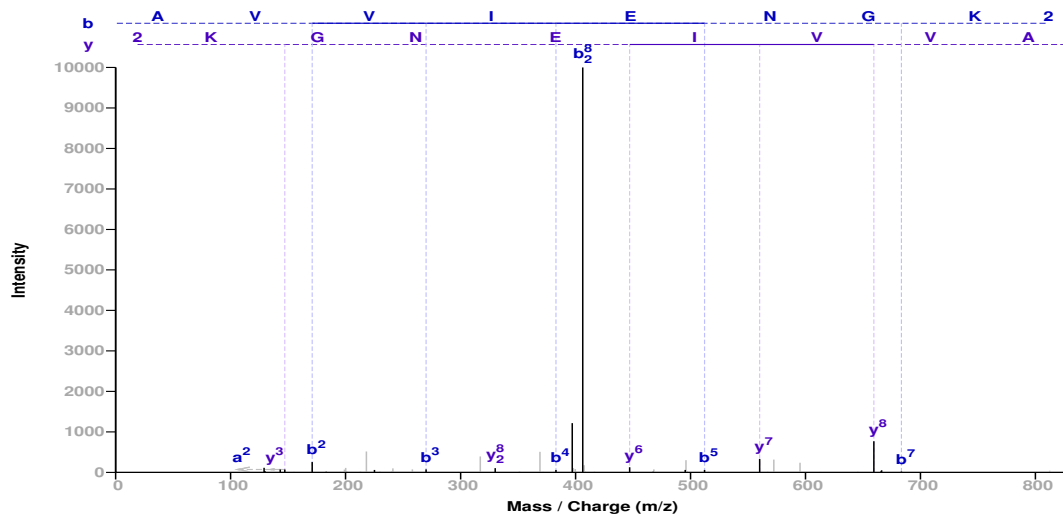

yeast0.Scan\_Number.1356 Precursor m/z: 406.555 cosine: 0.790  $\alpha$ : 0.605

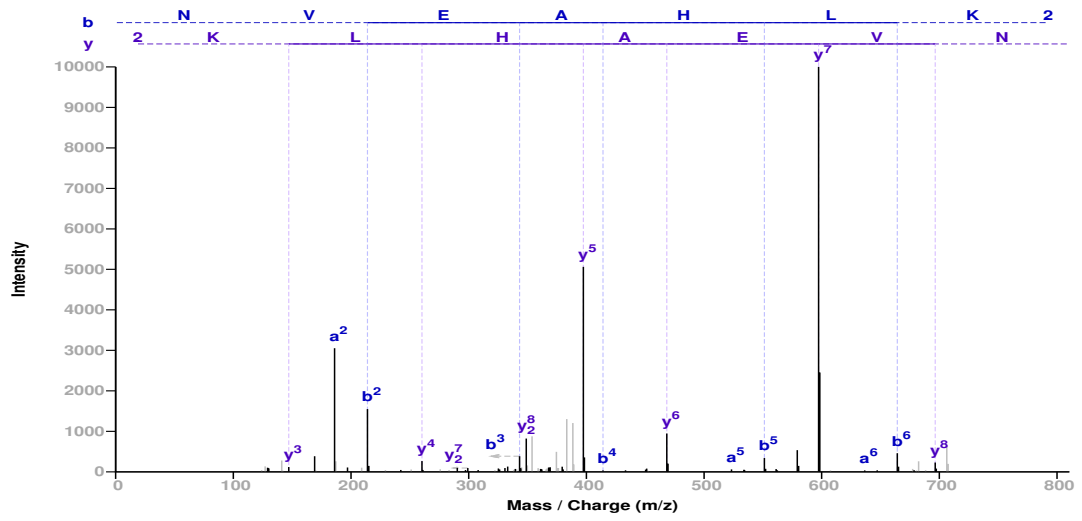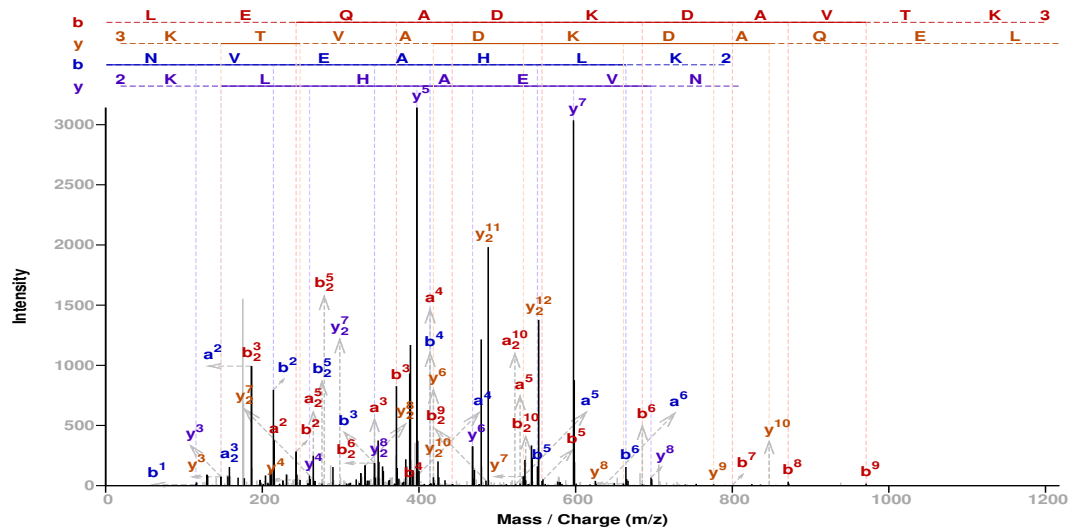

yeast0.Scan\_Number\_4544 Precursor m/z: 722.399 cosine: 0.789  $\alpha$ : 0.604

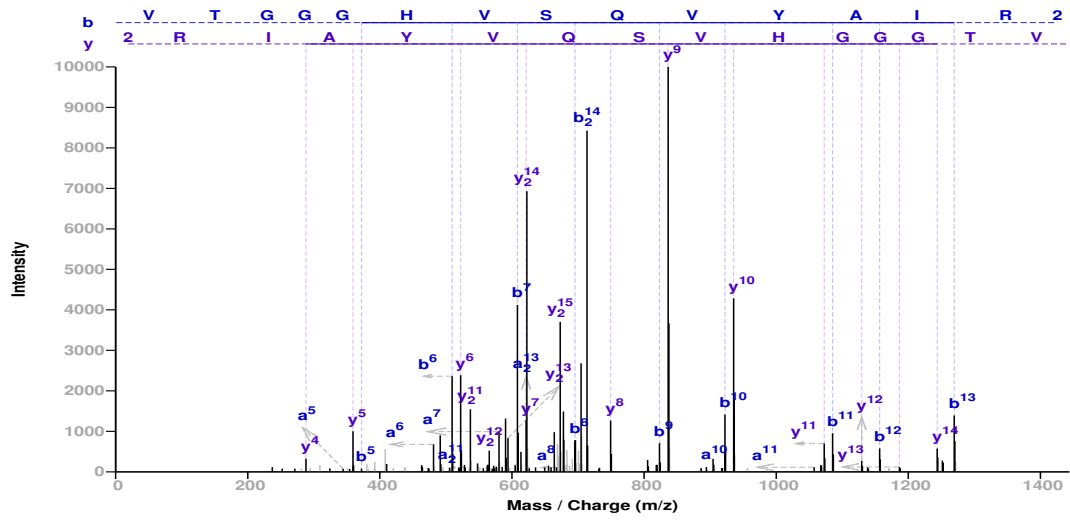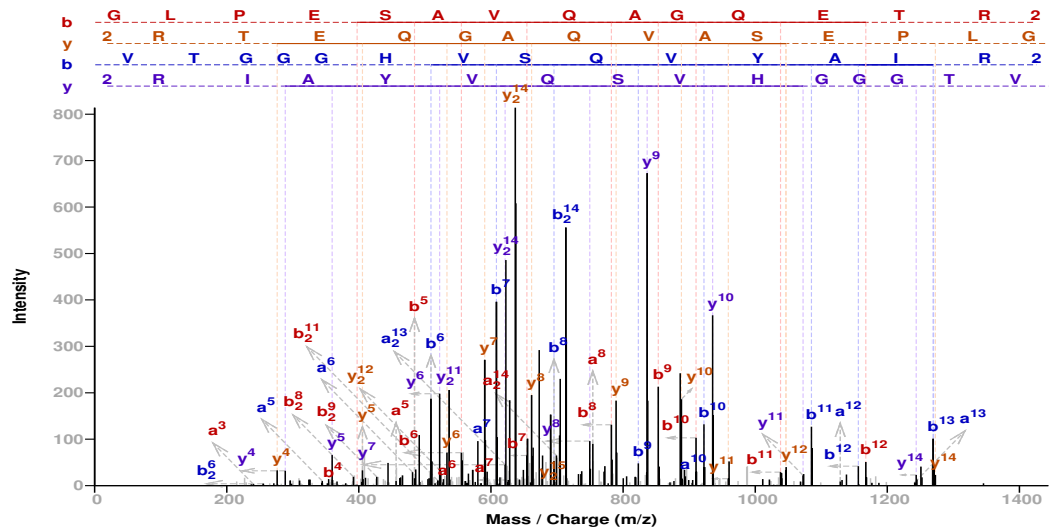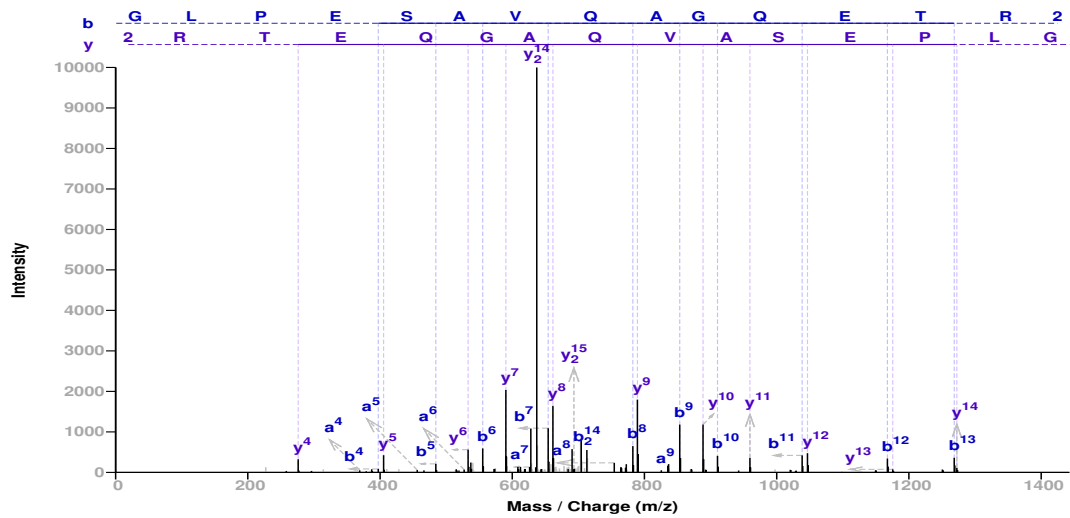

yeast0.Scan\_Number\_6262 Precursor m/z: 495.790 cosine: 0.726  $\alpha$ : 0.598

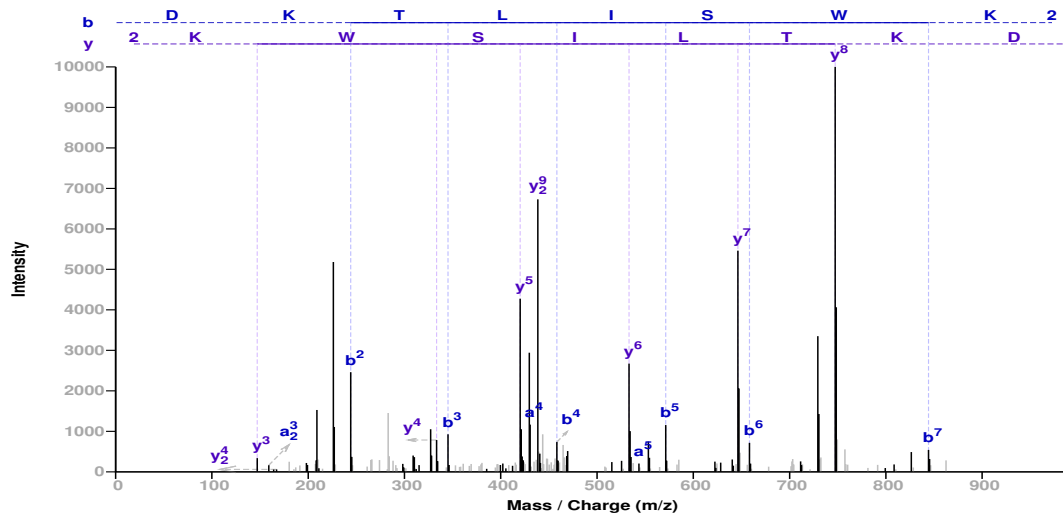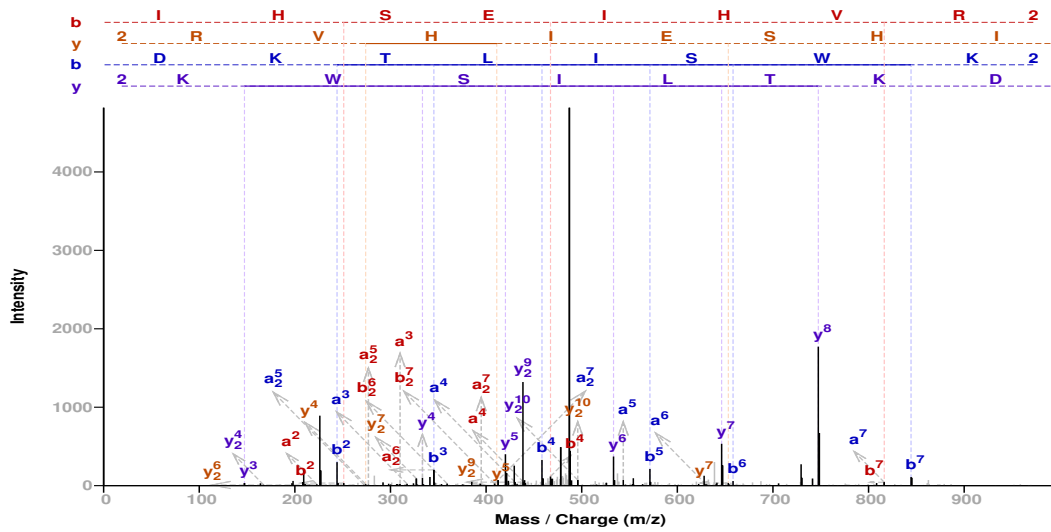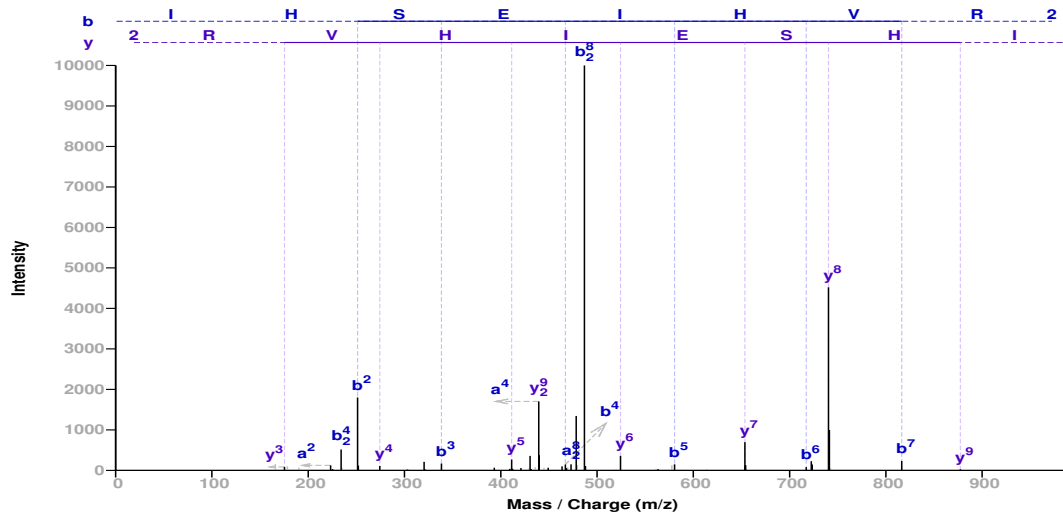



yeast0.Scan\_Number\_5647 Precursor m/z: 596.308 cosine: 0.822  $\alpha$ : 0.597

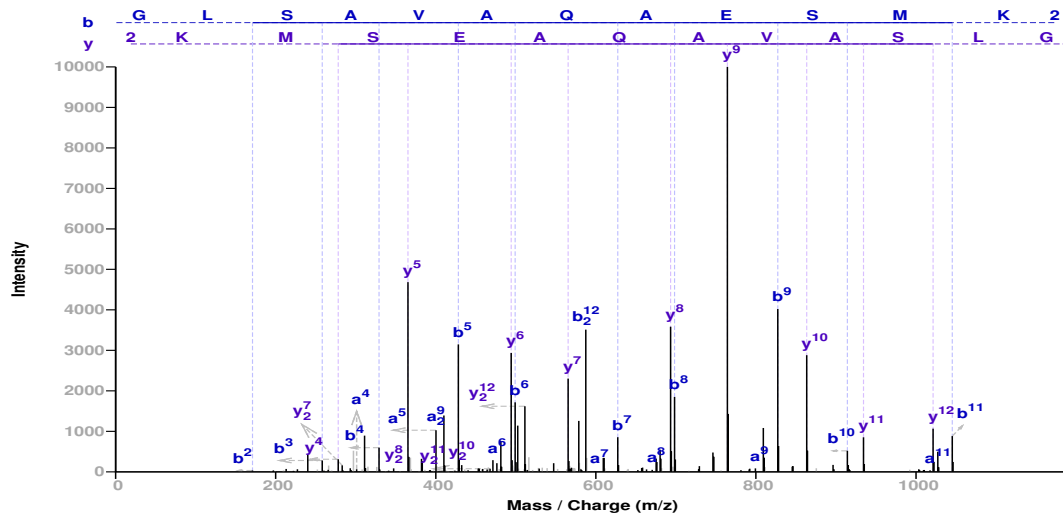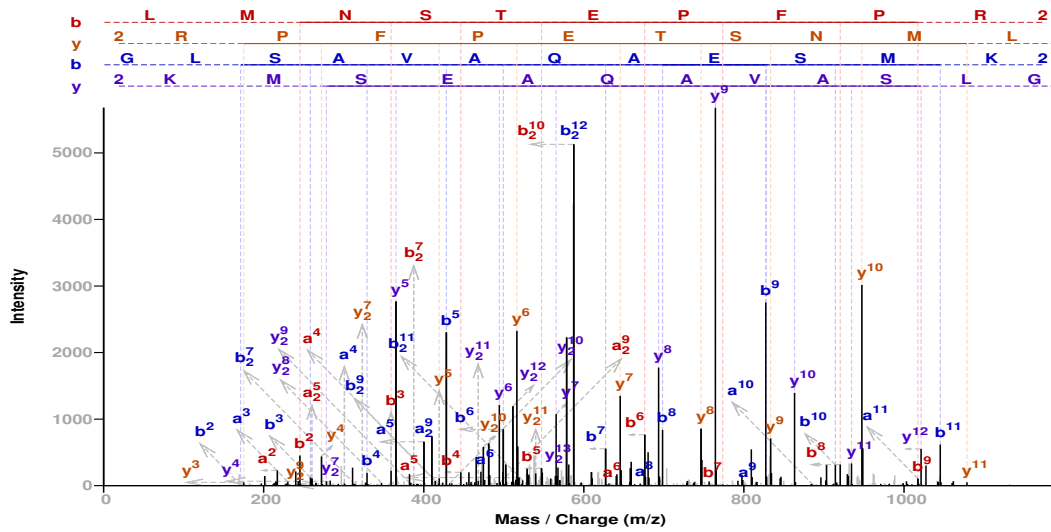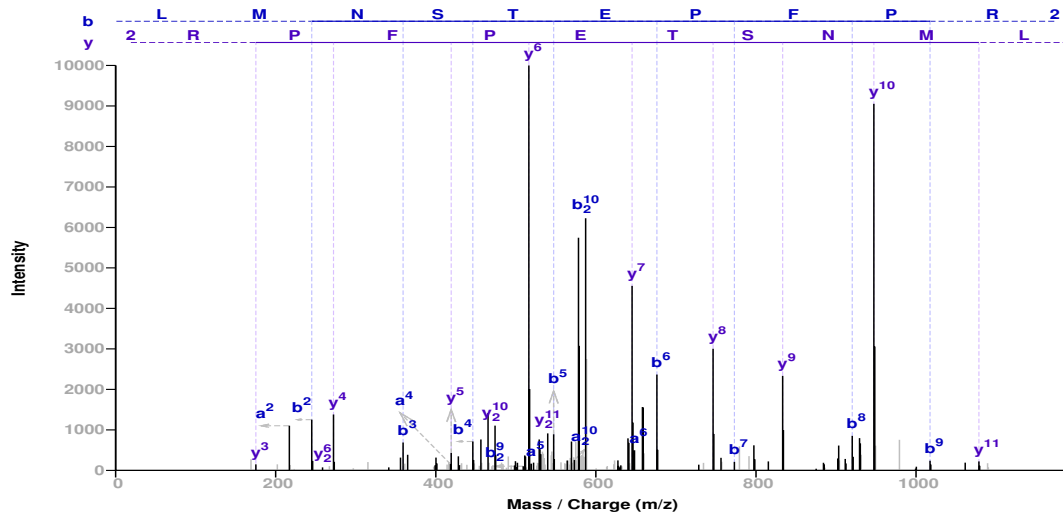

yeast0.Scan\_Number\_6516 Precursor m/z: 412.240 cosine: 0.883  $\alpha$ : 0.573

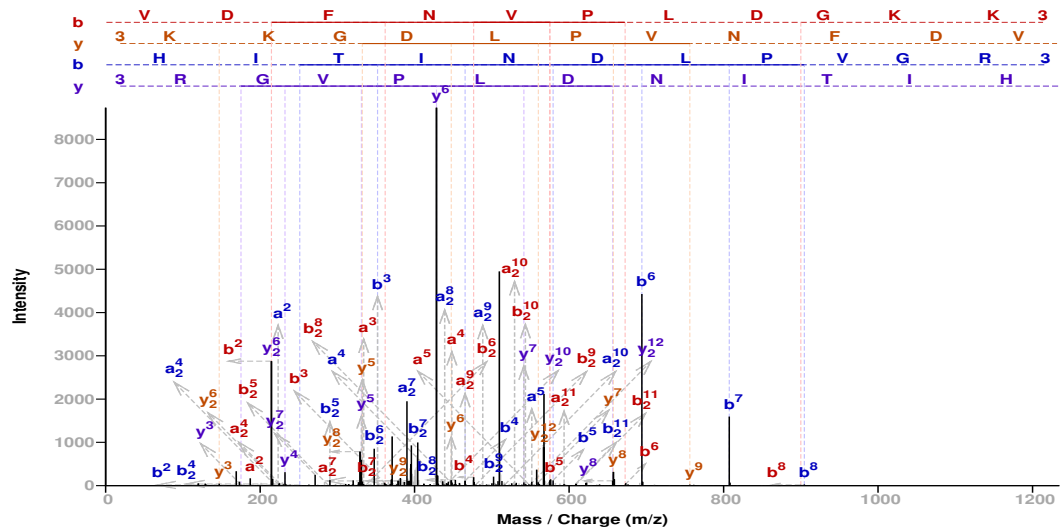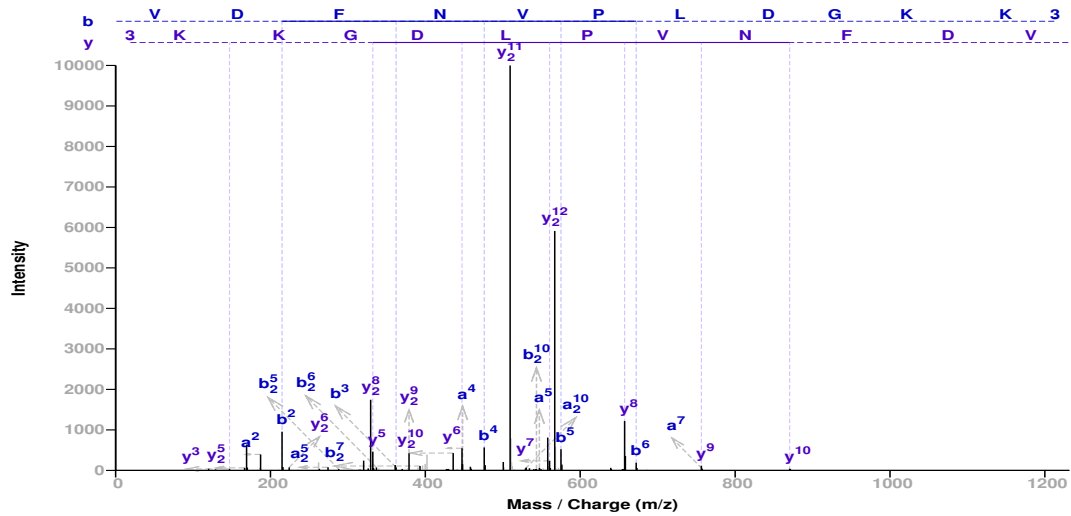

yeast0\_Scan\_Number\_8421 Precursor m/z: 544.002 cosine: 0.835  $\alpha$ : 0.571

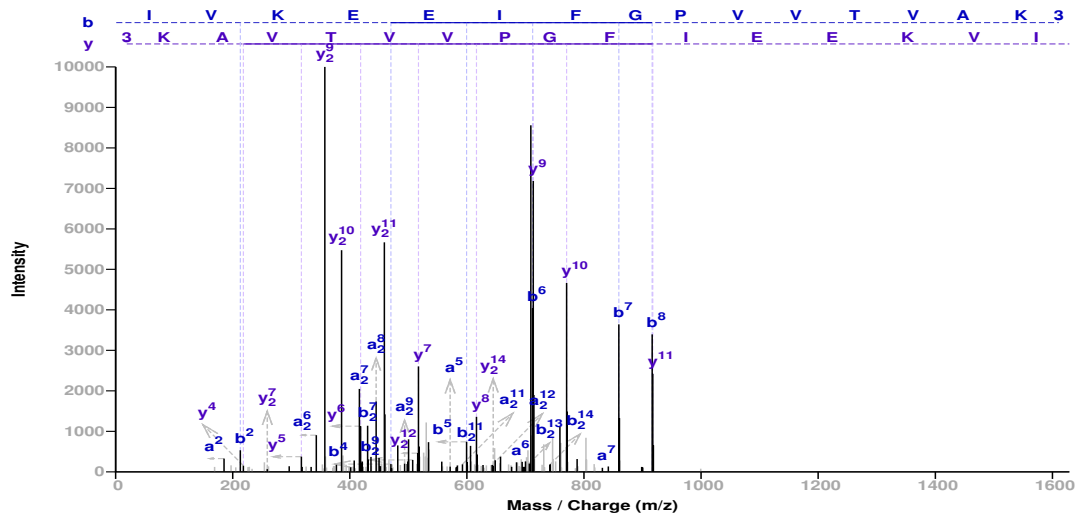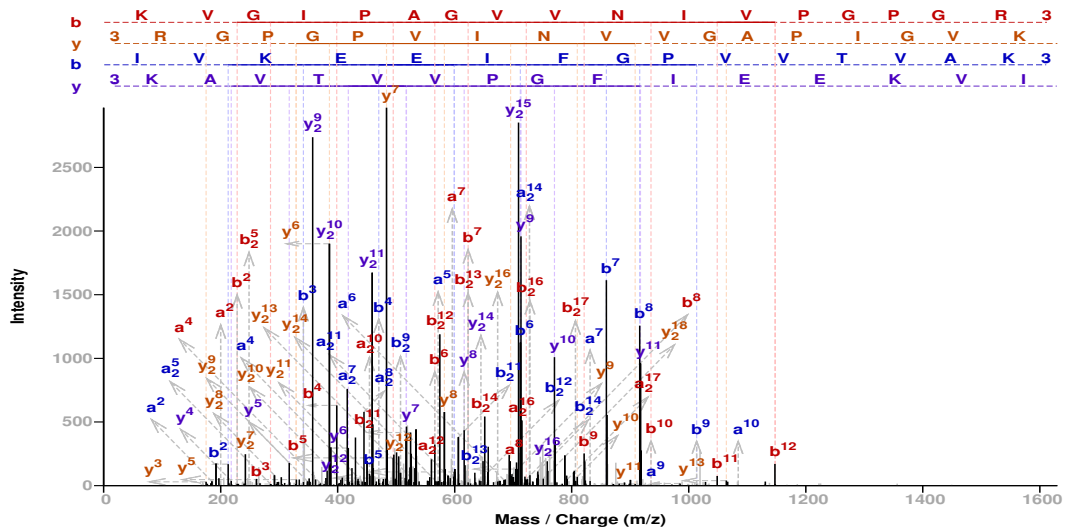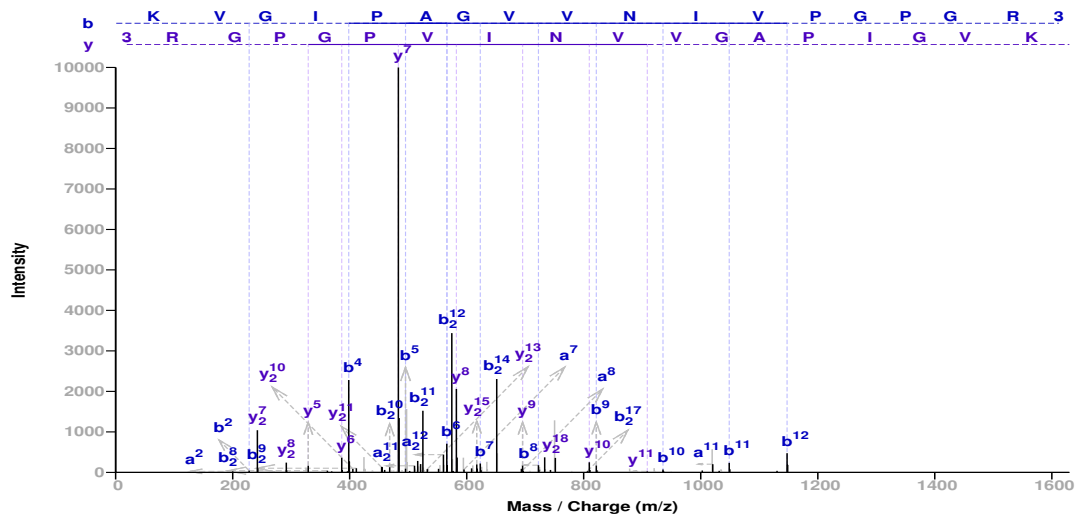

yeast0.Scan\_Number\_3055 Precursor m/z: 399.199 cosine: 0.770  $\alpha$ : 0.571

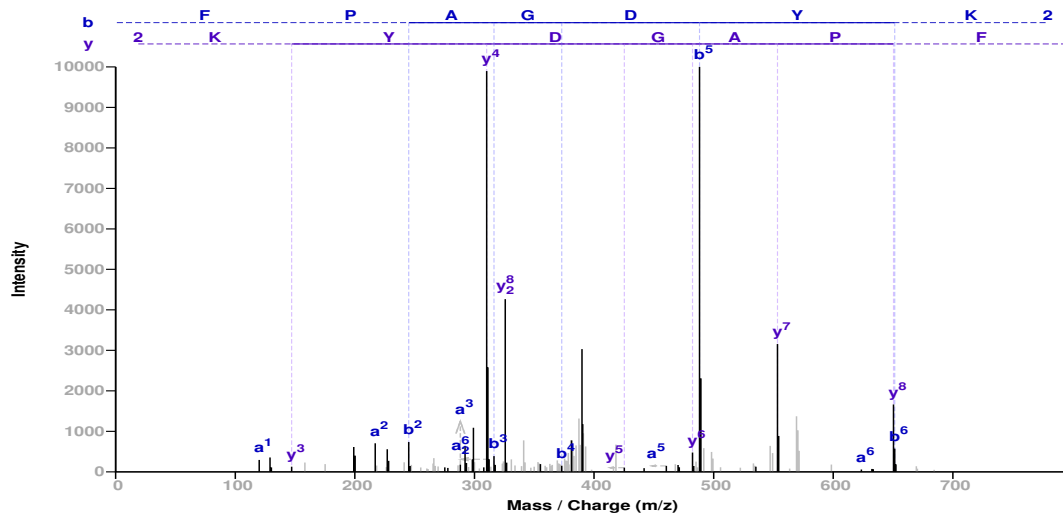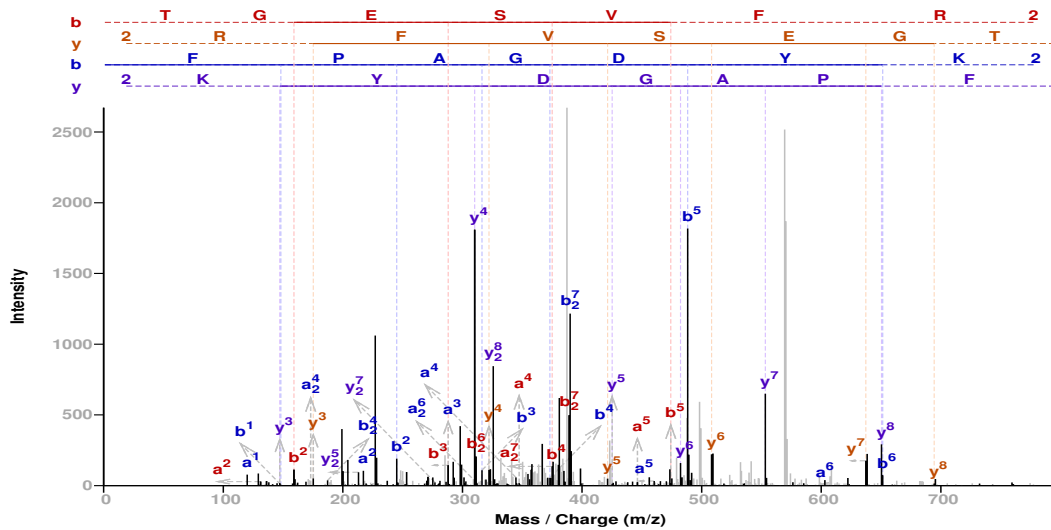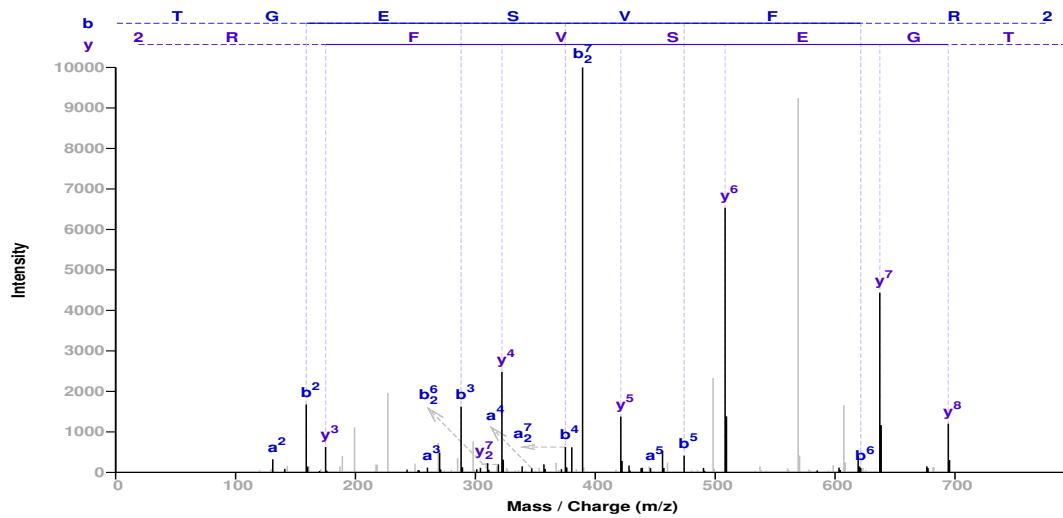



yeast0.Scan\_Number\_638 Precursor m/z: 445.260 cosine: 0.734  $\alpha$ : 0.567

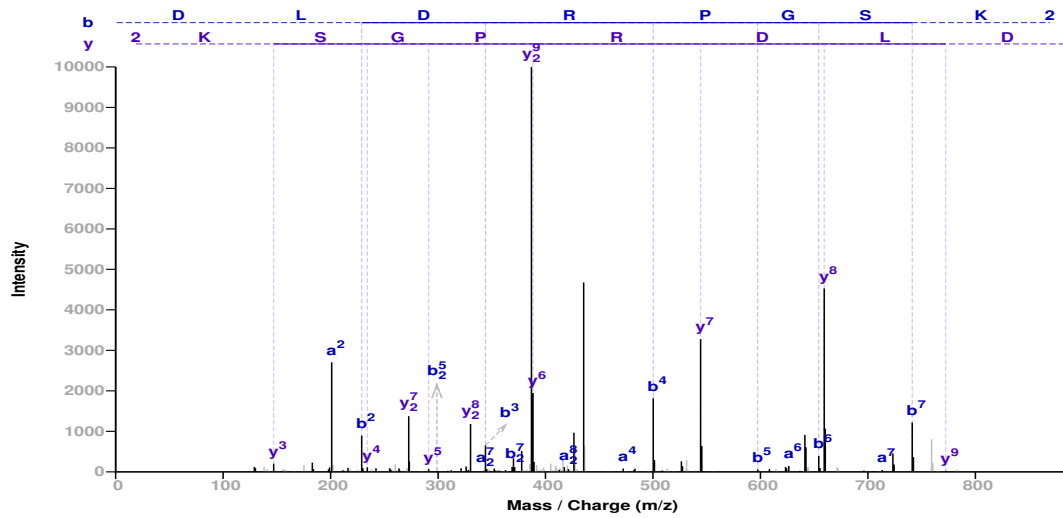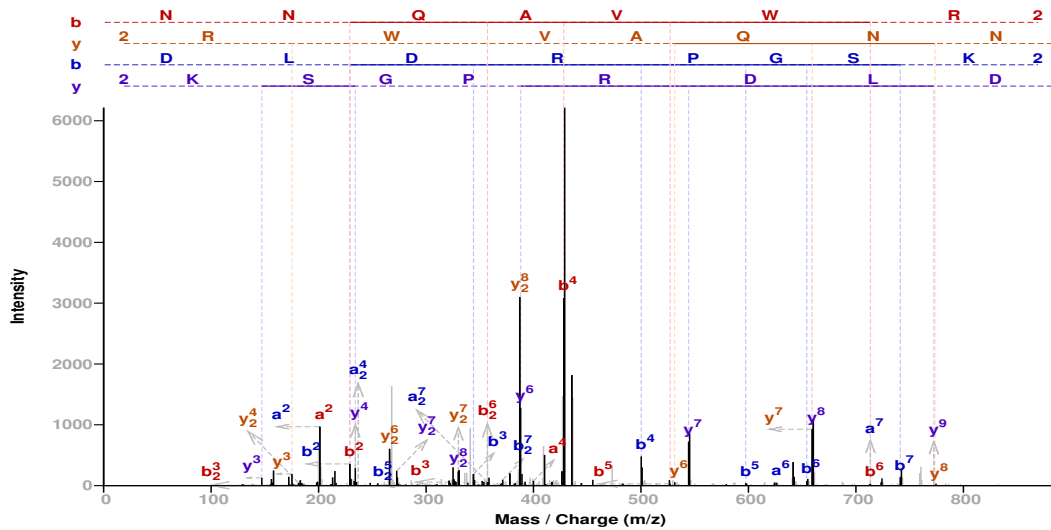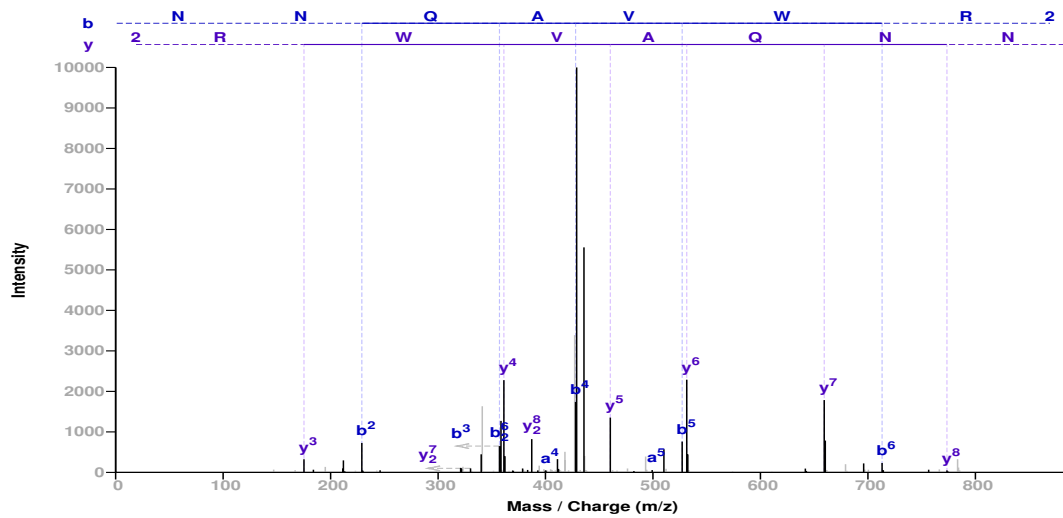

yeast0.Scan\_Number\_6688 Precursor m/z: 556.302 cosine: 0.834  $\alpha$ : 0.566

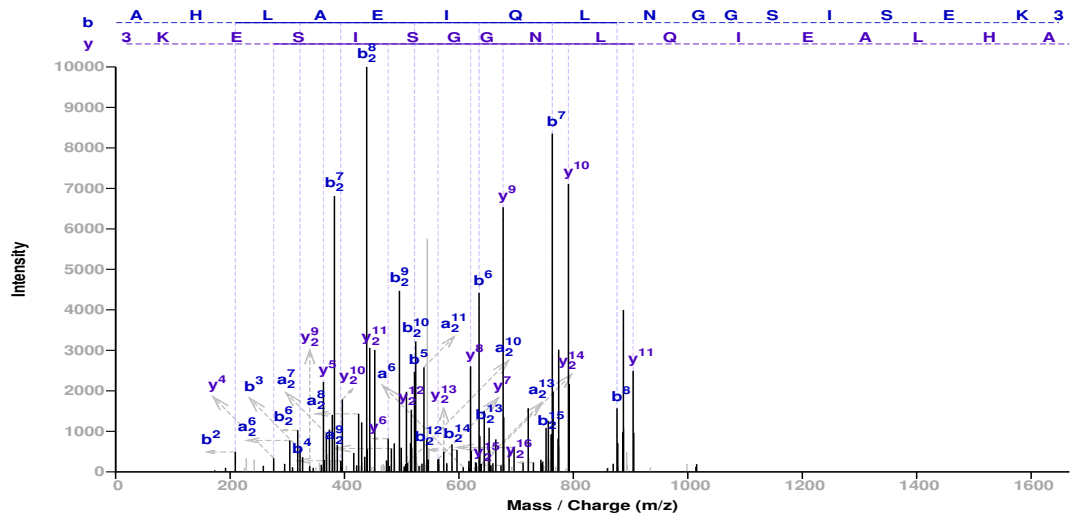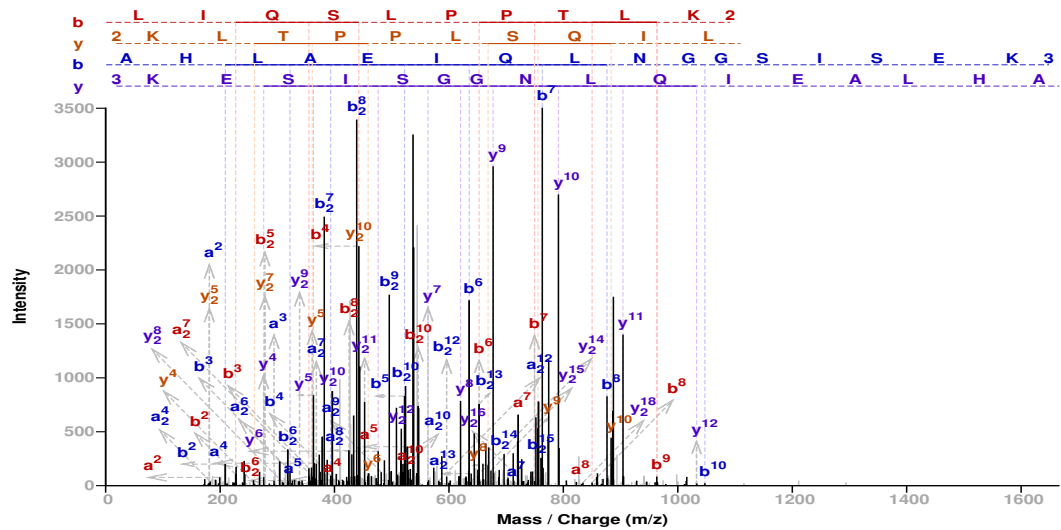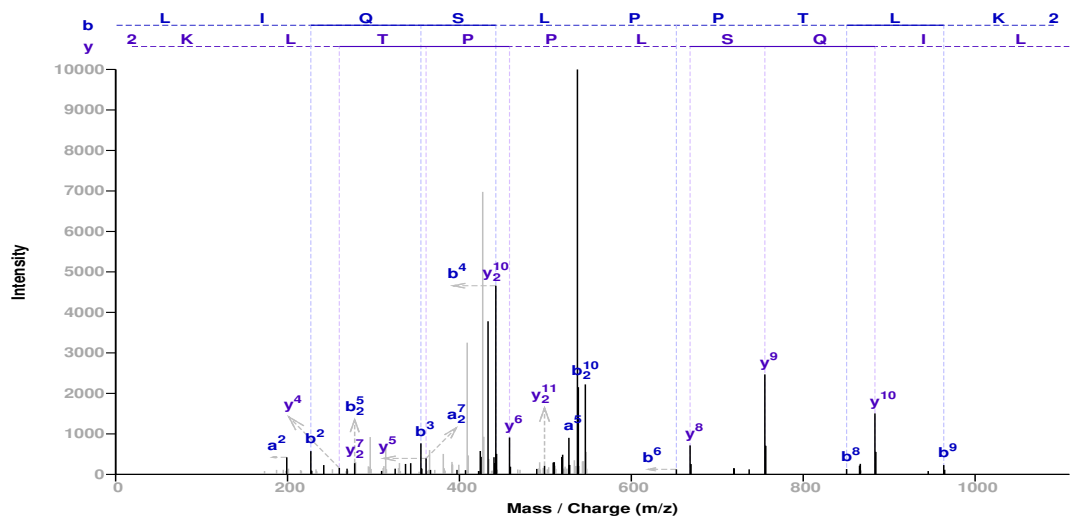

yeast0.Scan\_Number.1116 Precursor m/z: 475.594 cosine: 0.759  $\alpha$ : 0.565

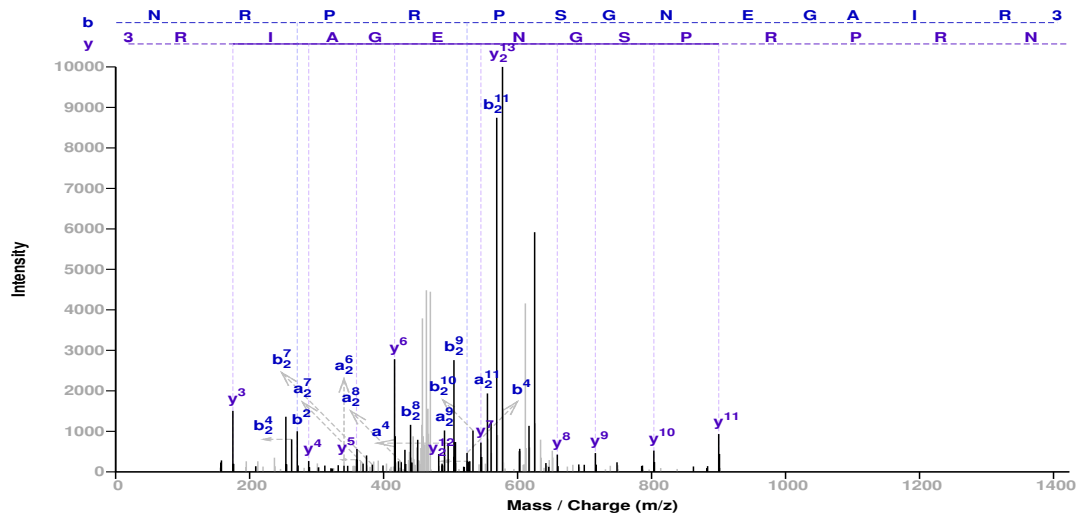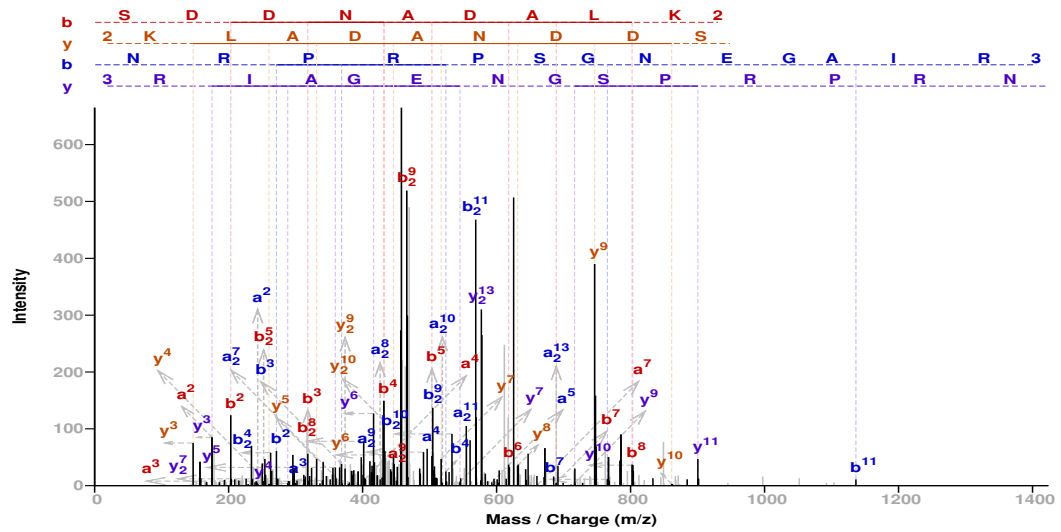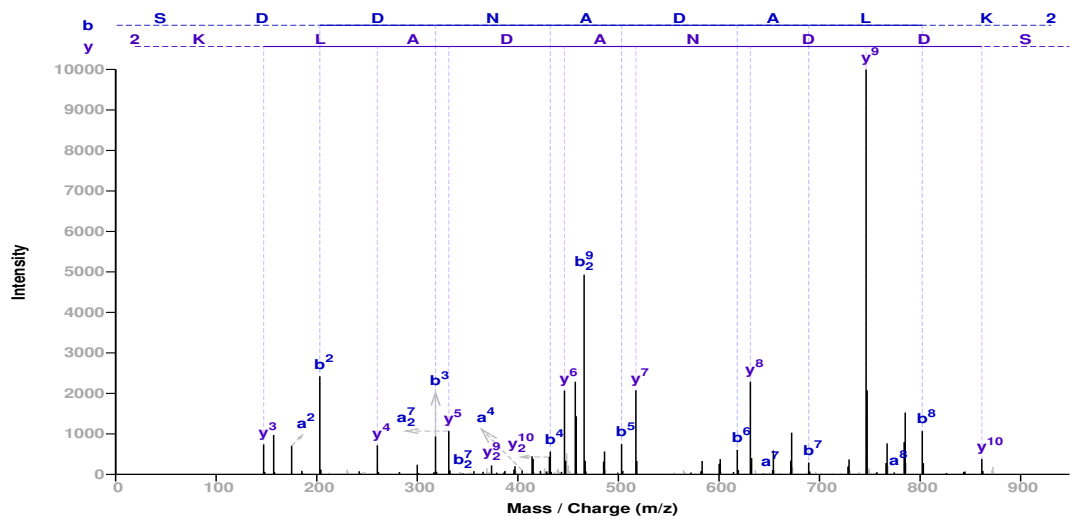



yeast0.Scan\_Number\_5325 Precursor m/z: 577.806 cosine: 0.760  $\alpha$ : 0.561

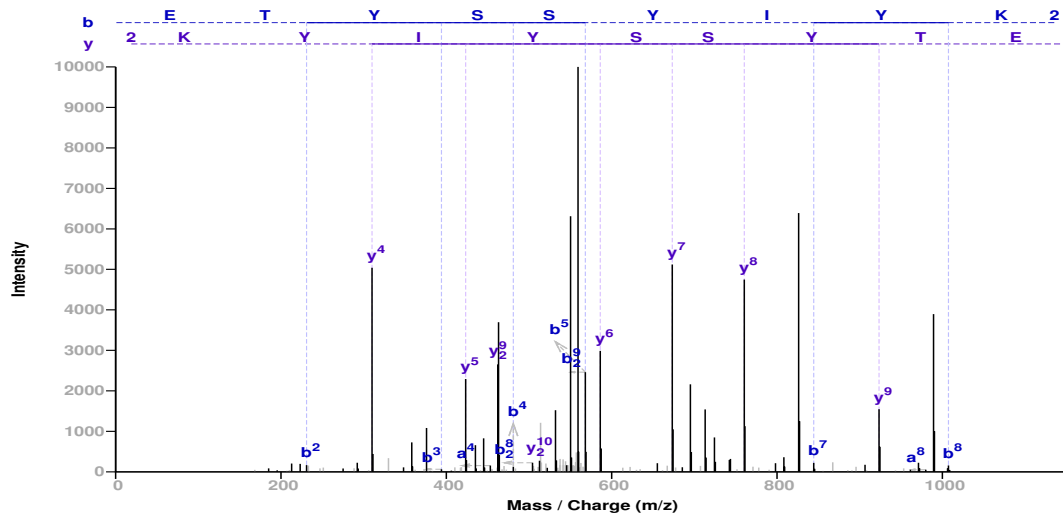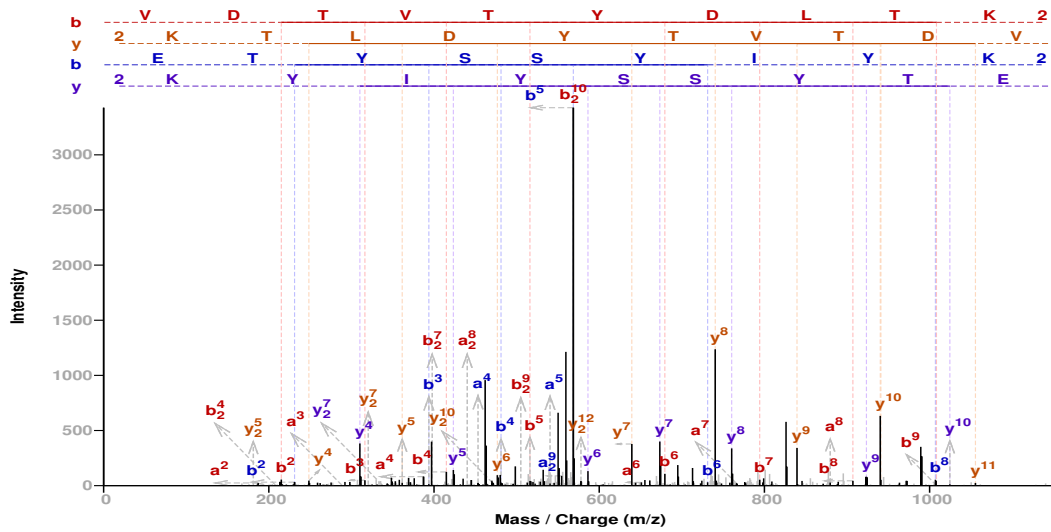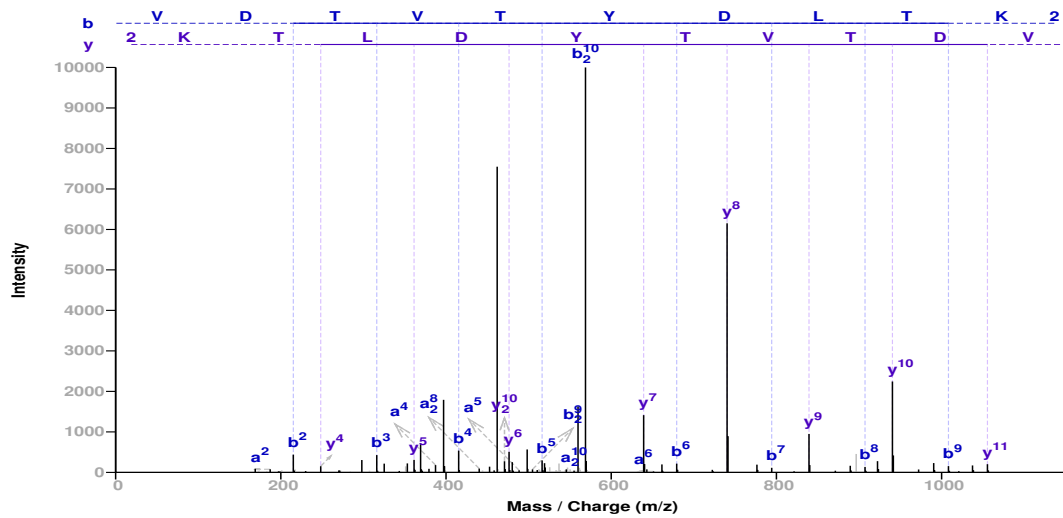

yeast0\_Scan\_Number\_6318 Precursor m/z: 608.821 cosine: 0.750  $\alpha$ : 0.561

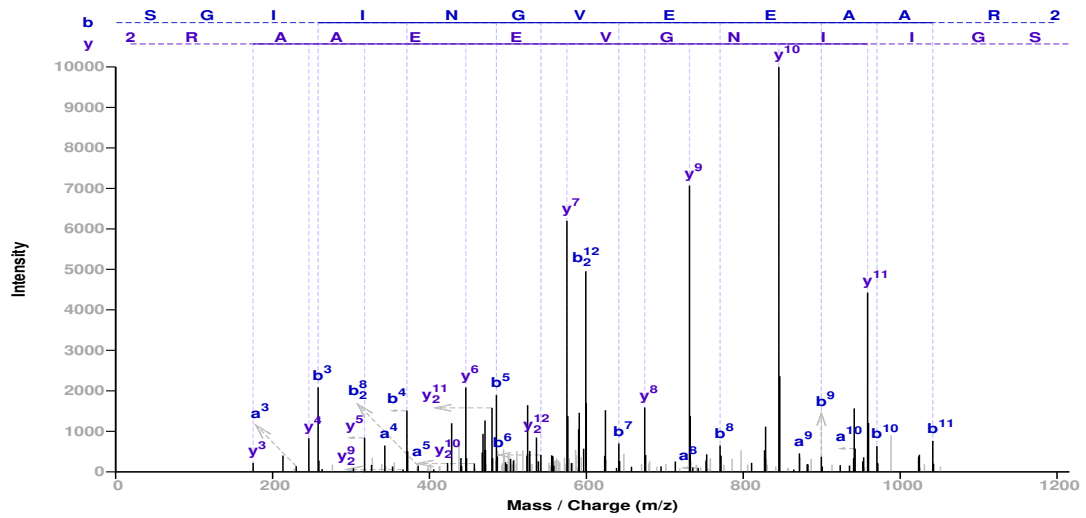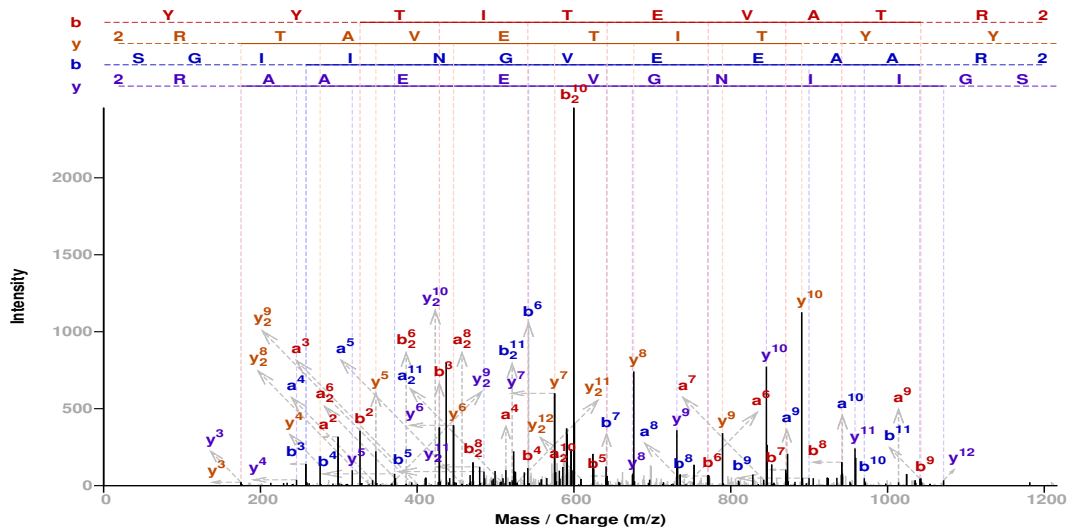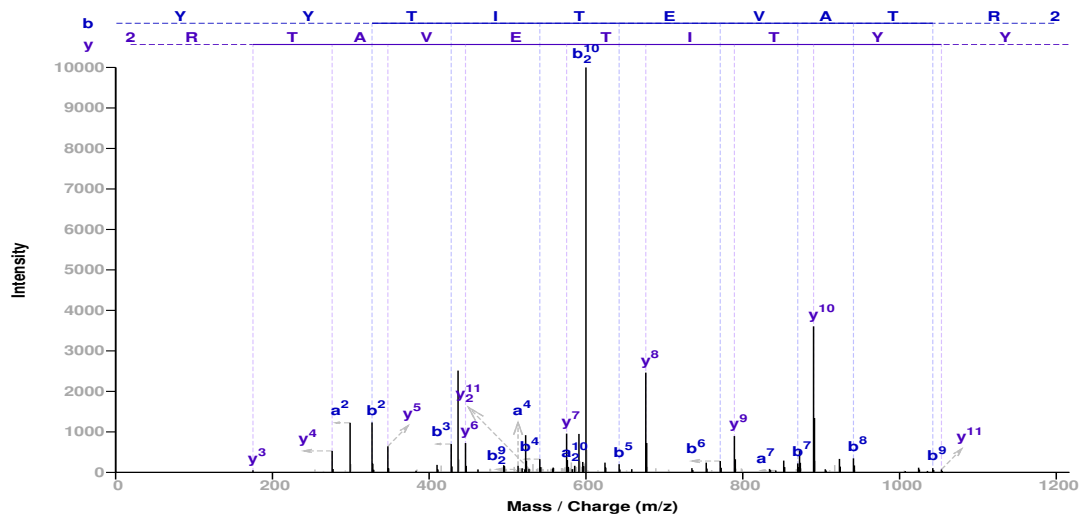

yeast0.Scan\_Number\_3459 Precursor m/z: 558.771 cosine: 0.750  $\alpha$ : 0.554

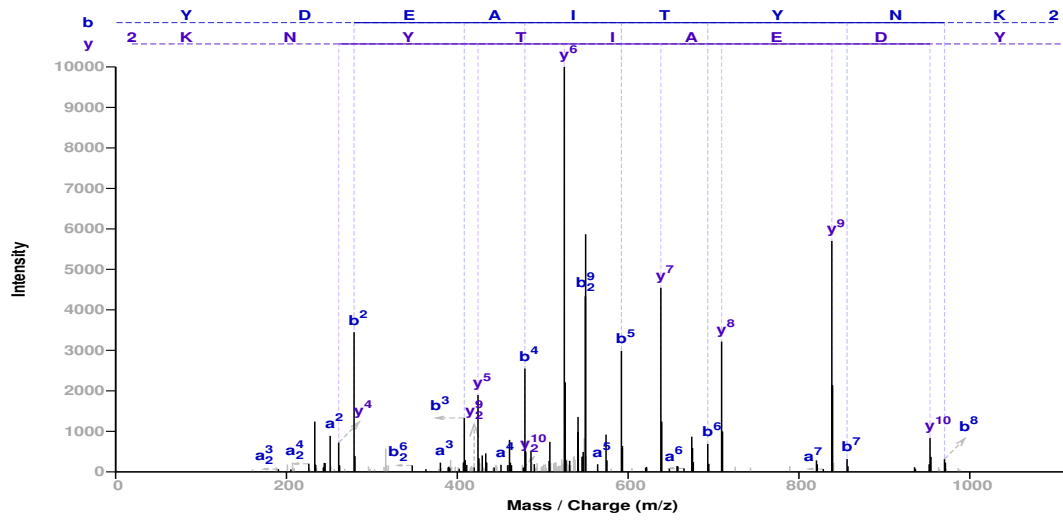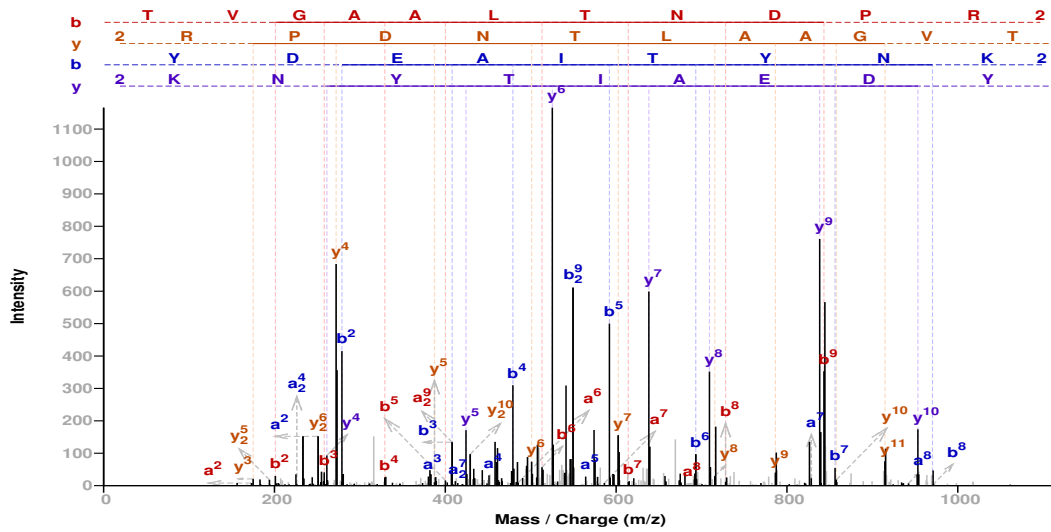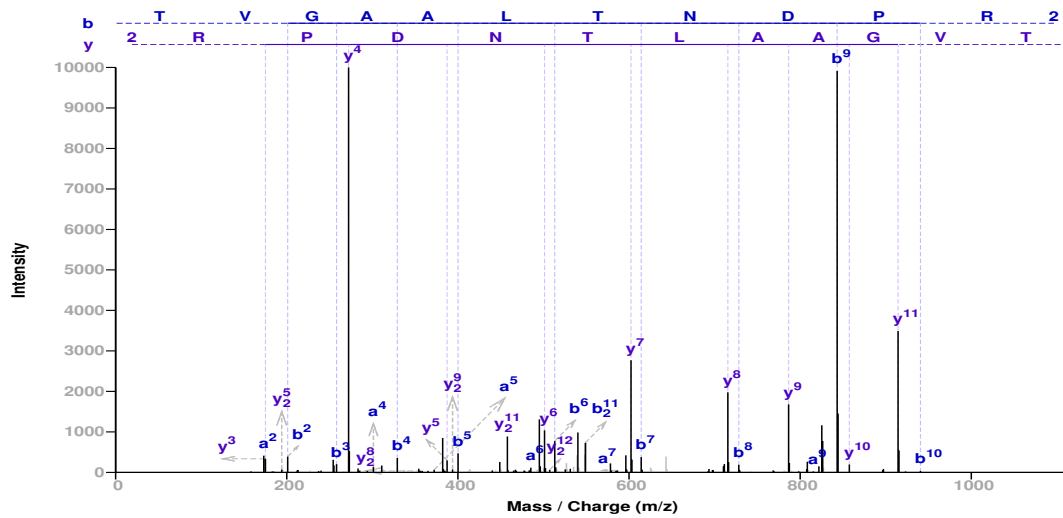

yeast0.Scan\_Number\_4622 Precursor m/z: 372.738 cosine: 0.854  $\alpha$ : 0.553

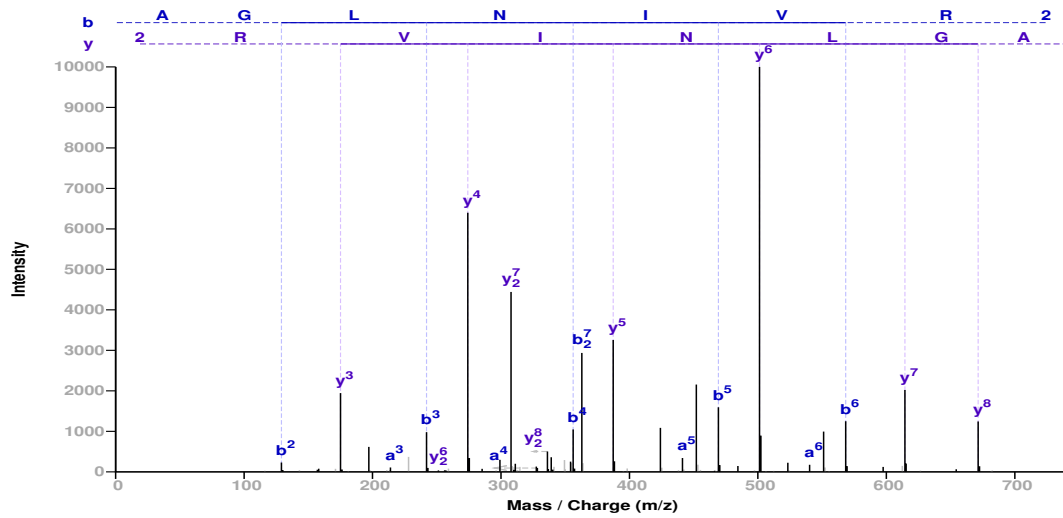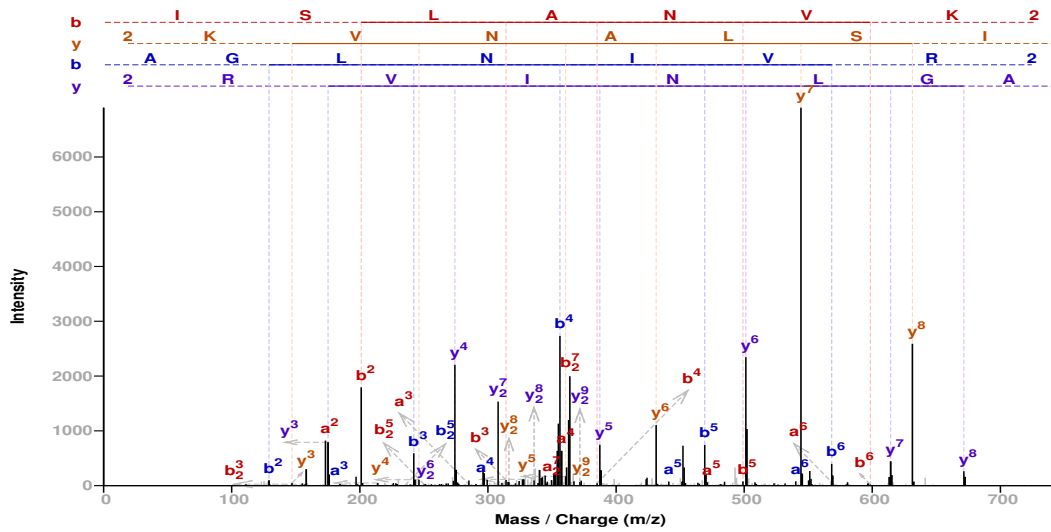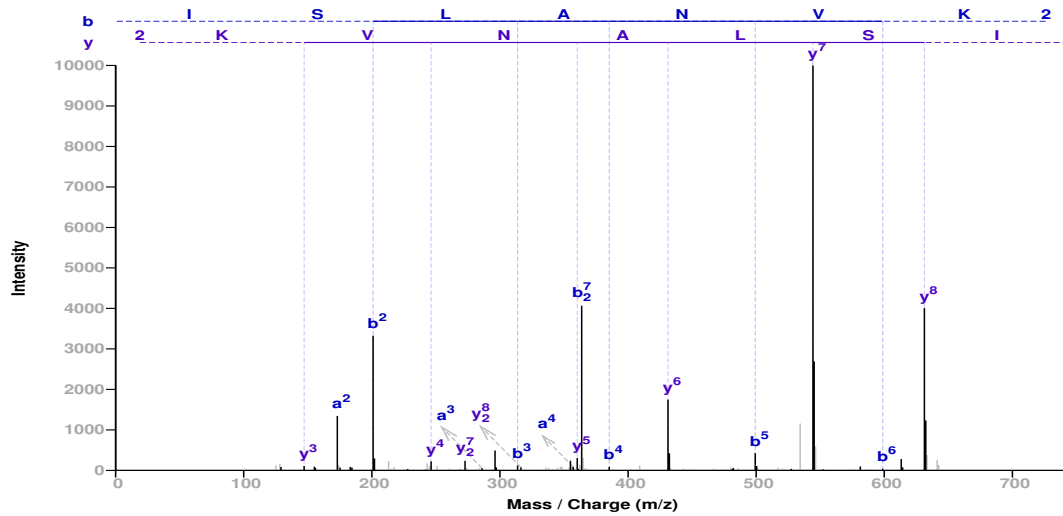

yeast0\_Scan\_Number\_8574 Precursor m/z: 650.362 cosine: 0.836  $\alpha$ : 0.553

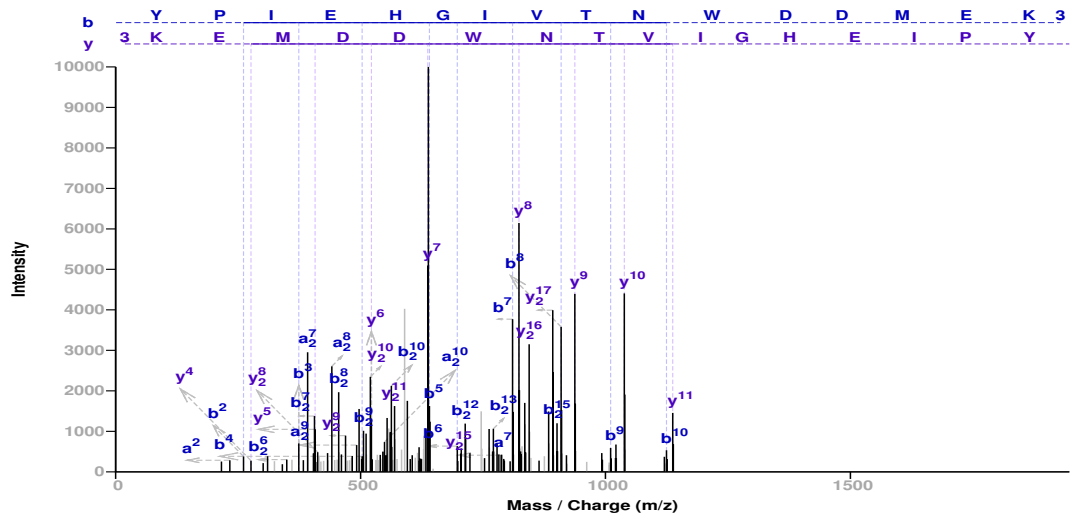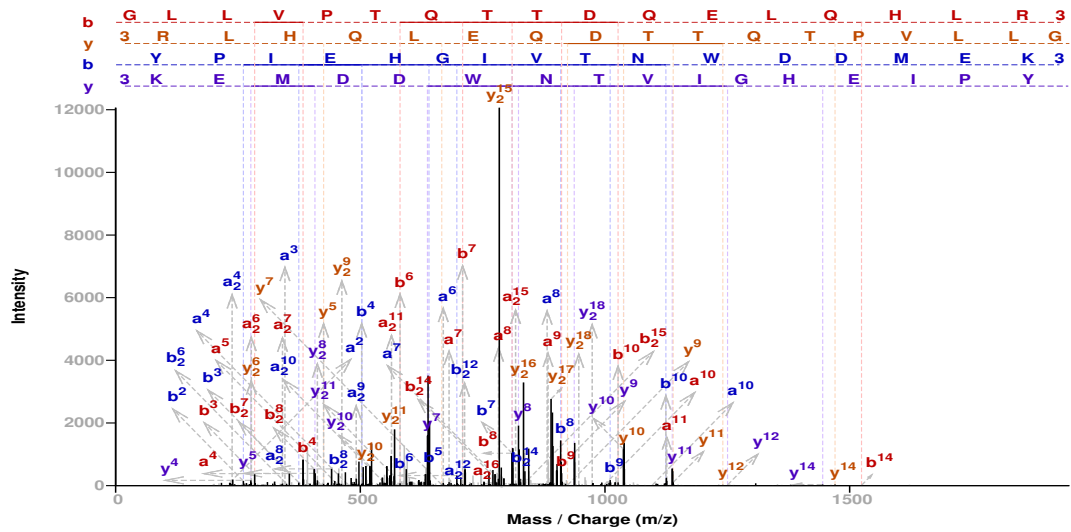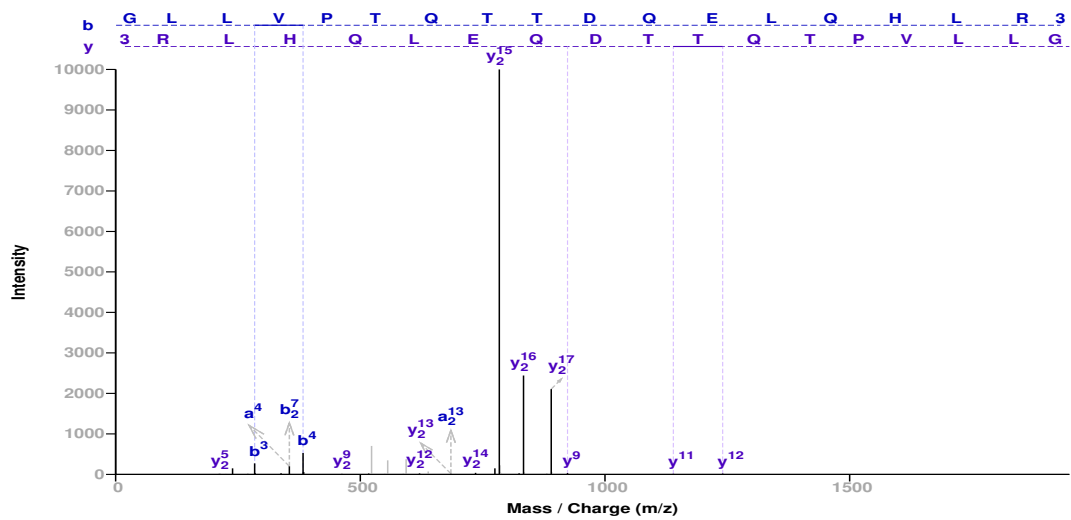

yeast0.Scan\_Number\_3364 Precursor m/z: 565.937 cosine: 0.728  $\alpha$ : 0.551

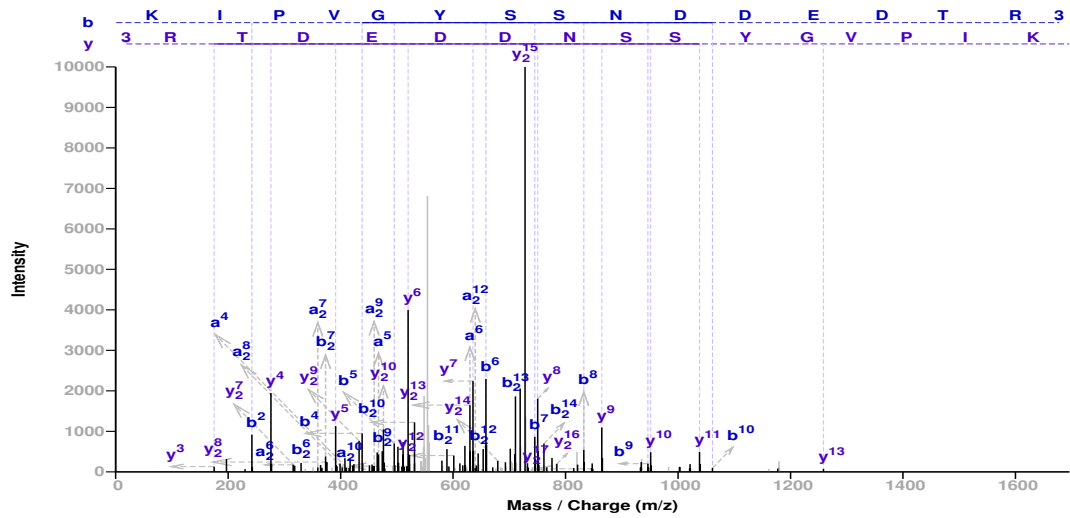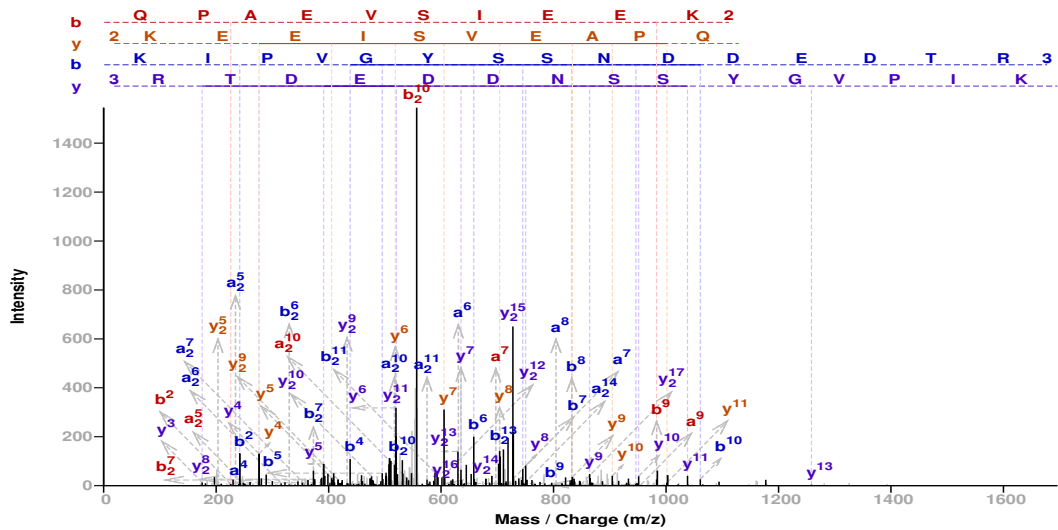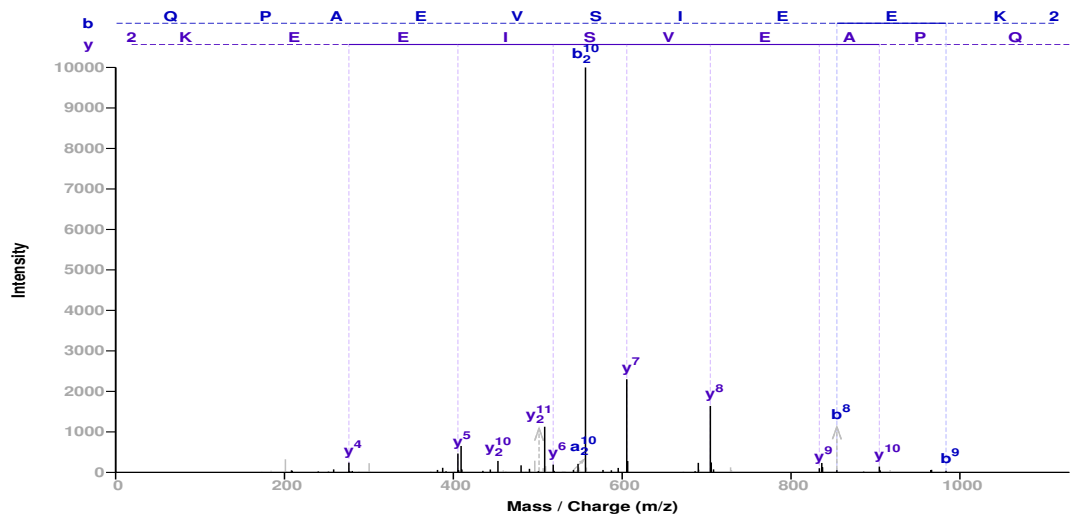

yeast0.Scan\_Number\_6948 Precursor m/z: 599.319 cosine: 0.794  $\alpha$ : 0.548

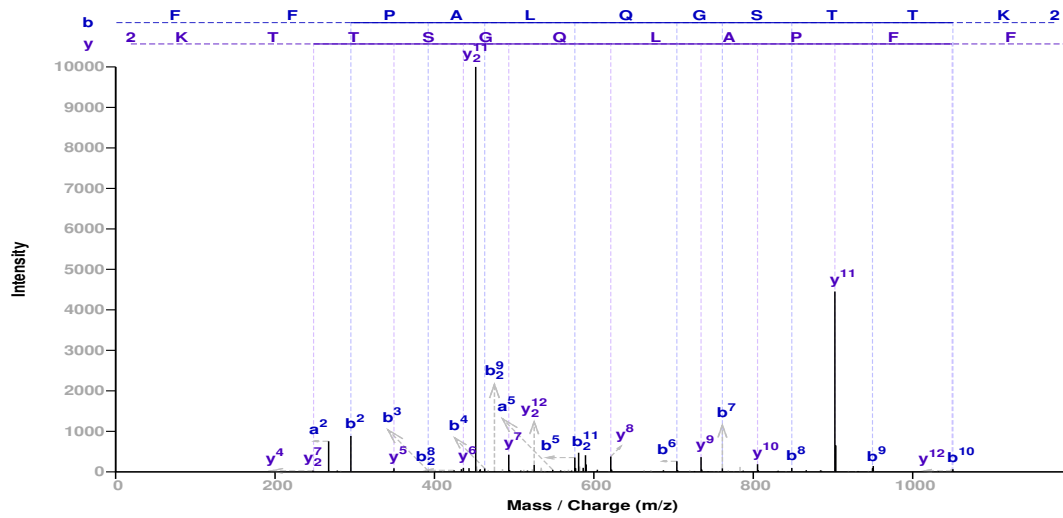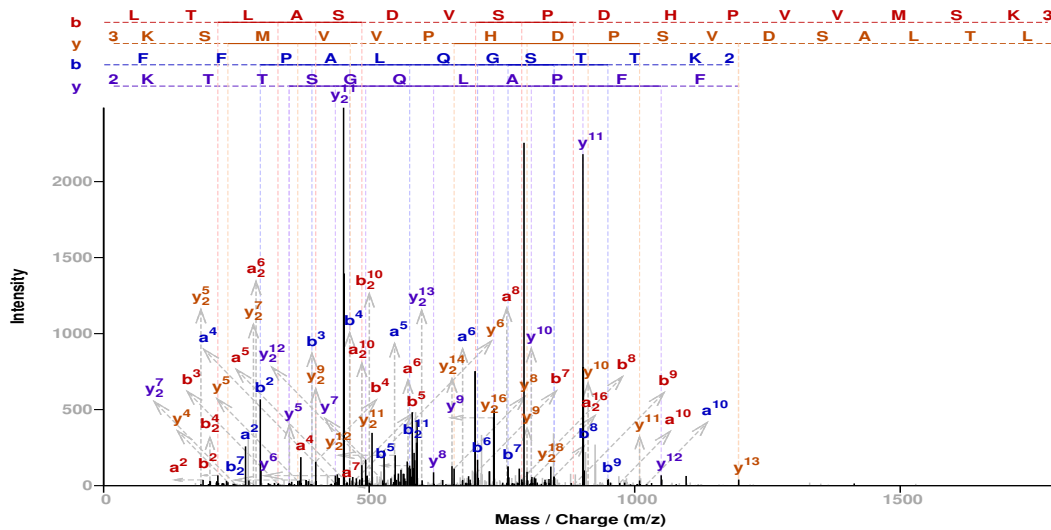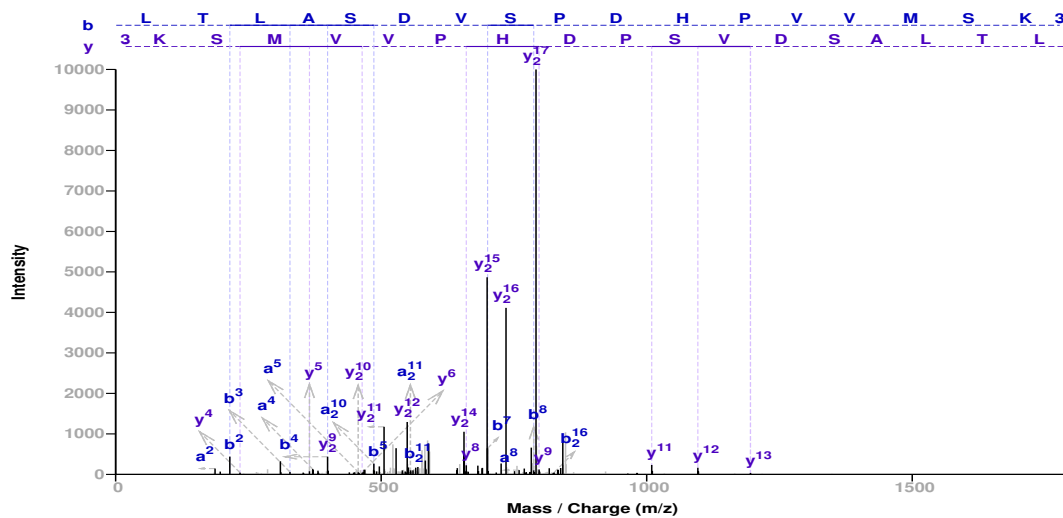

yeast0.Scan\_Number\_2437 Precursor m/z: 365.233 cosine: 0.949  $\alpha$ : 0.536

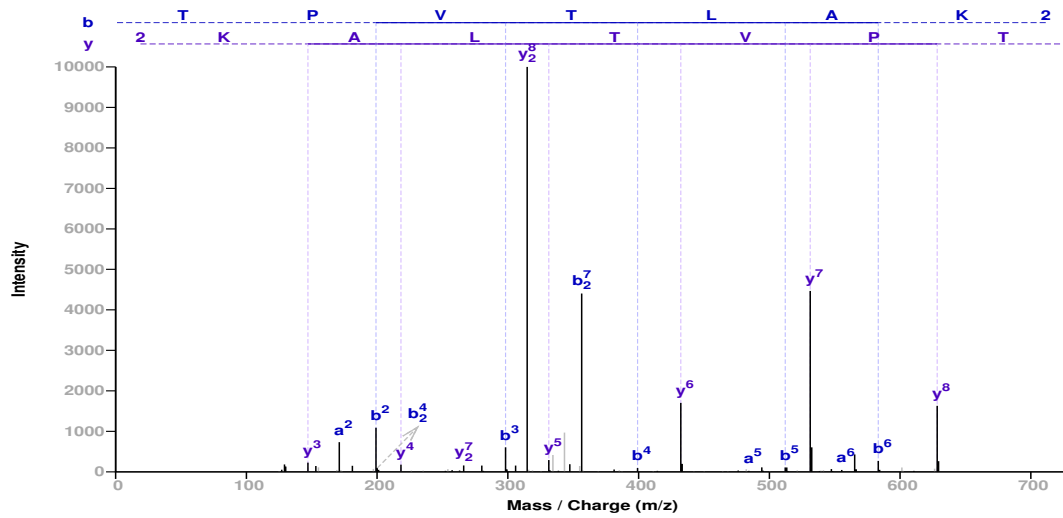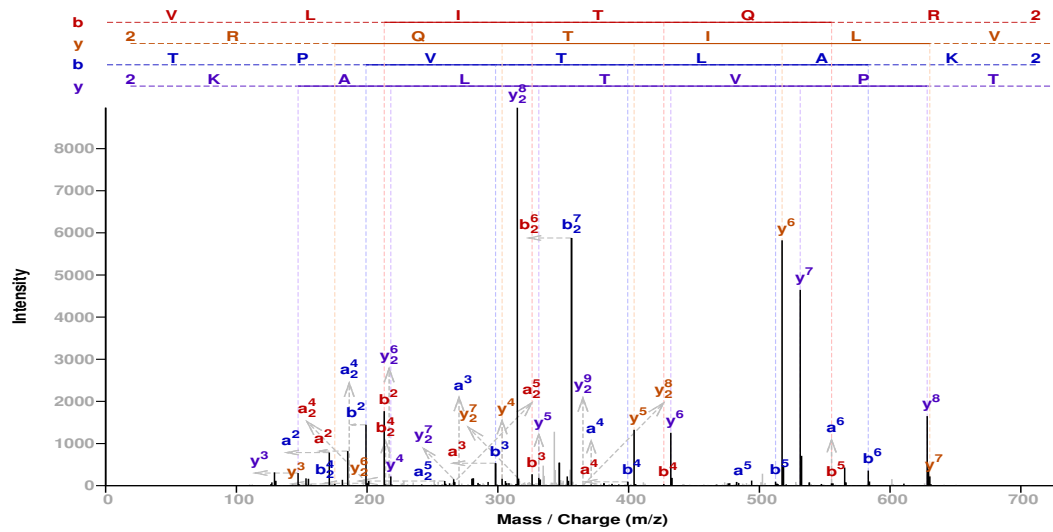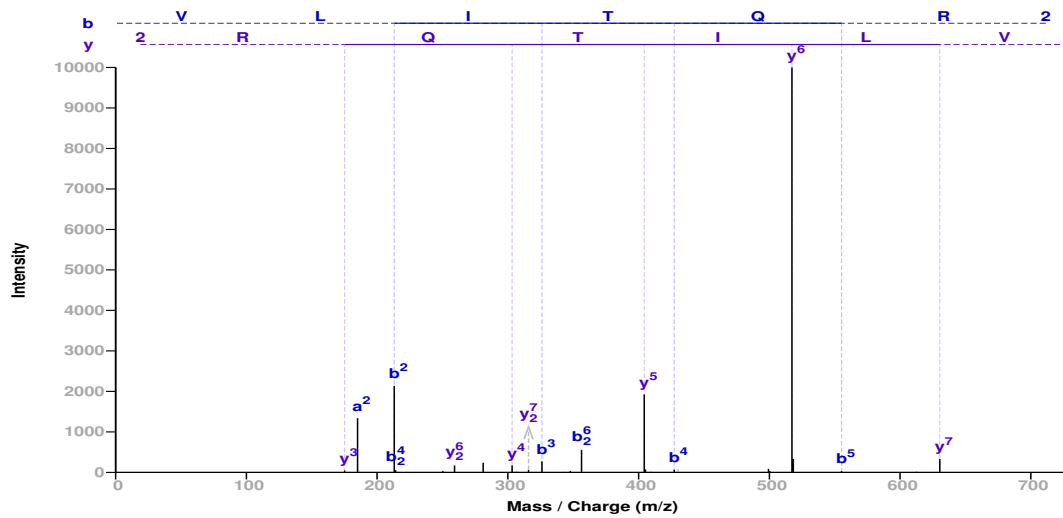



yeast0\_Scan\_Number\_2361 Precursor m/z: 451.236 cosine: 0.748  $\alpha$ : 0.533

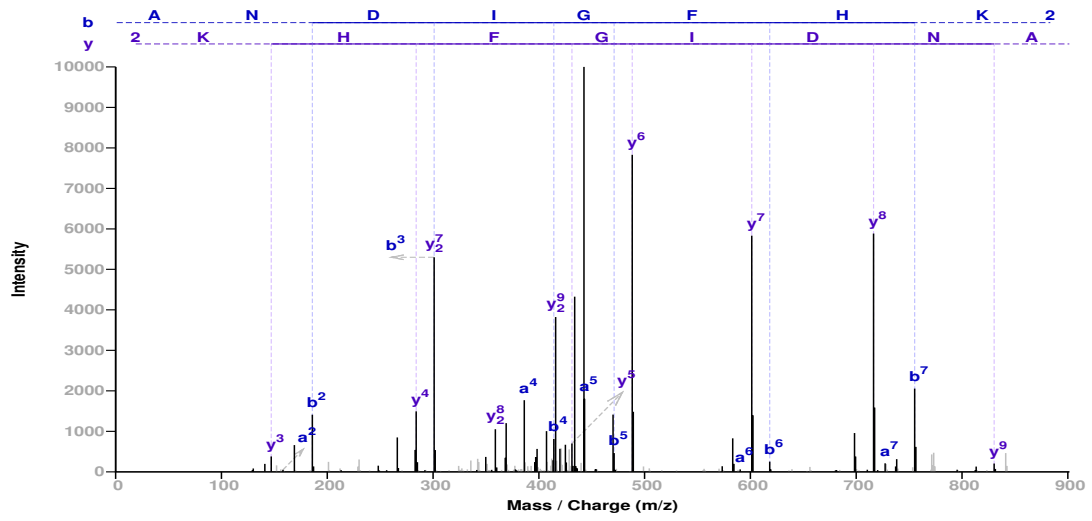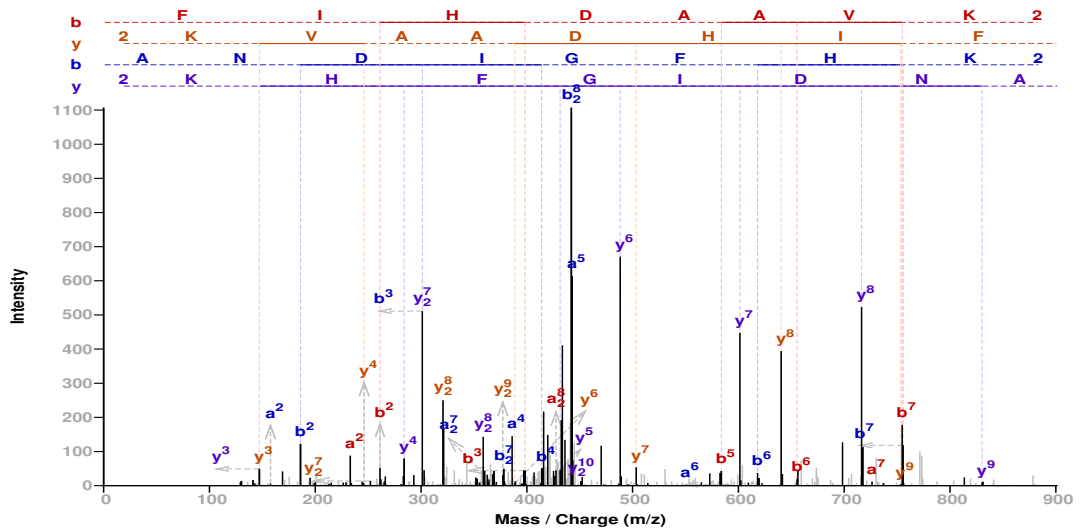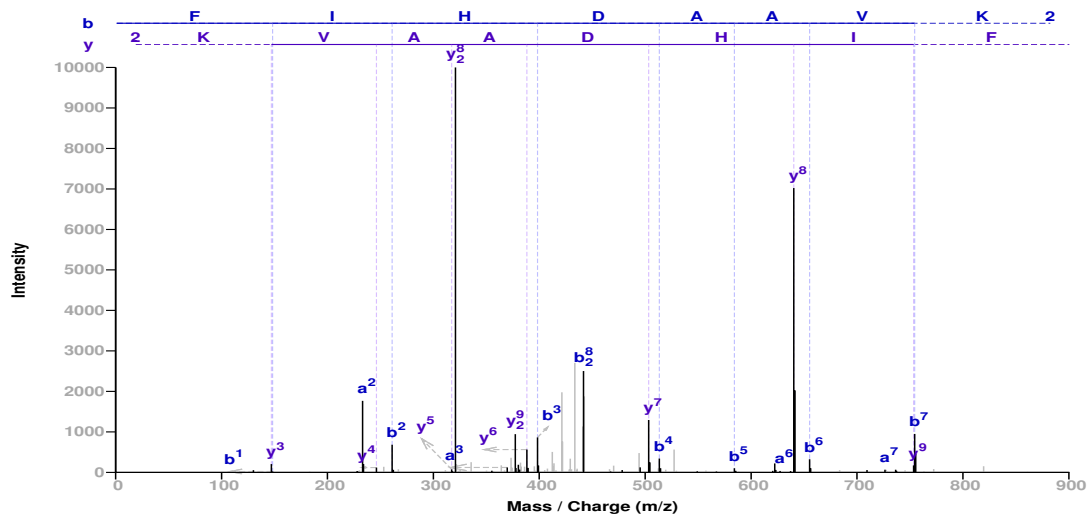



yeast0\_Scan\_Number\_2254 Precursor m/z: 373.231 cosine: 0.851  $\alpha$ : 0.523

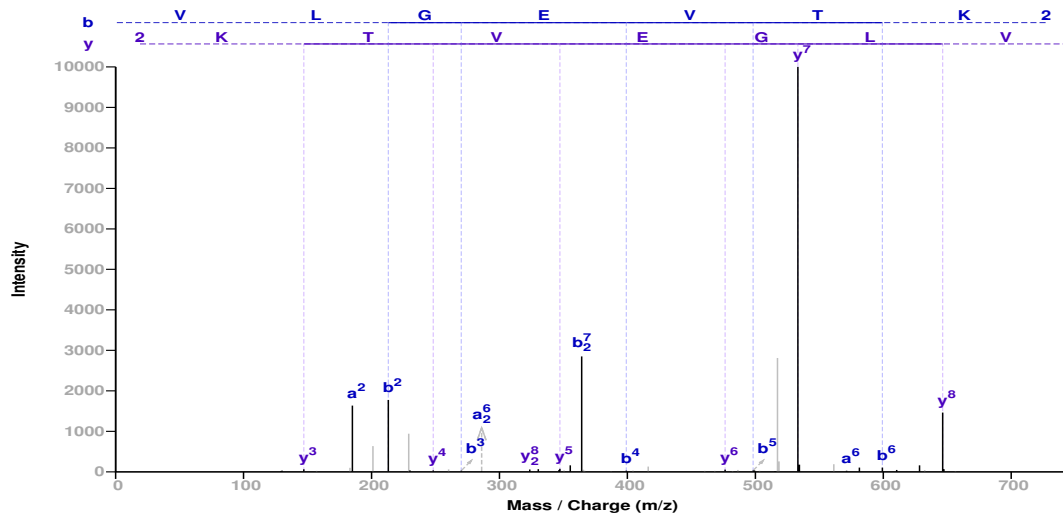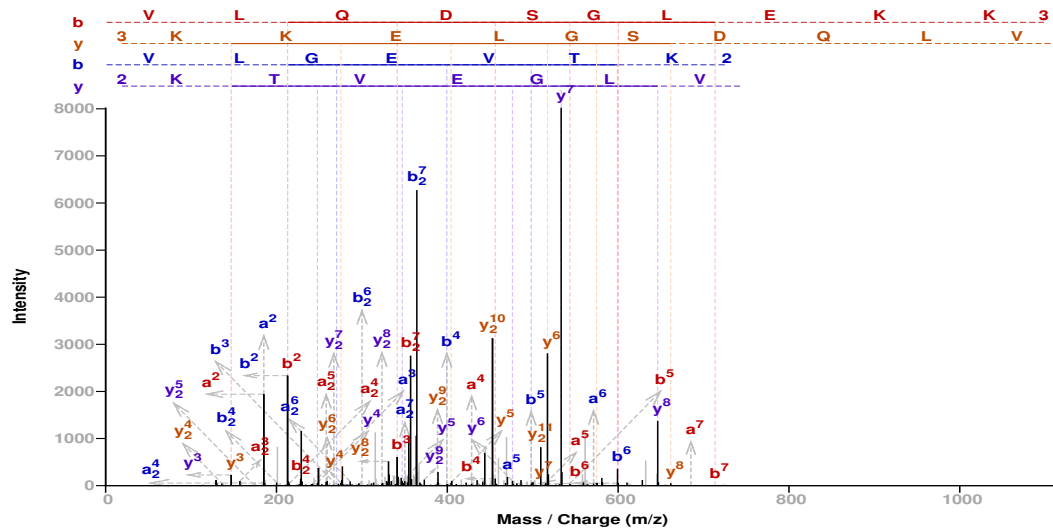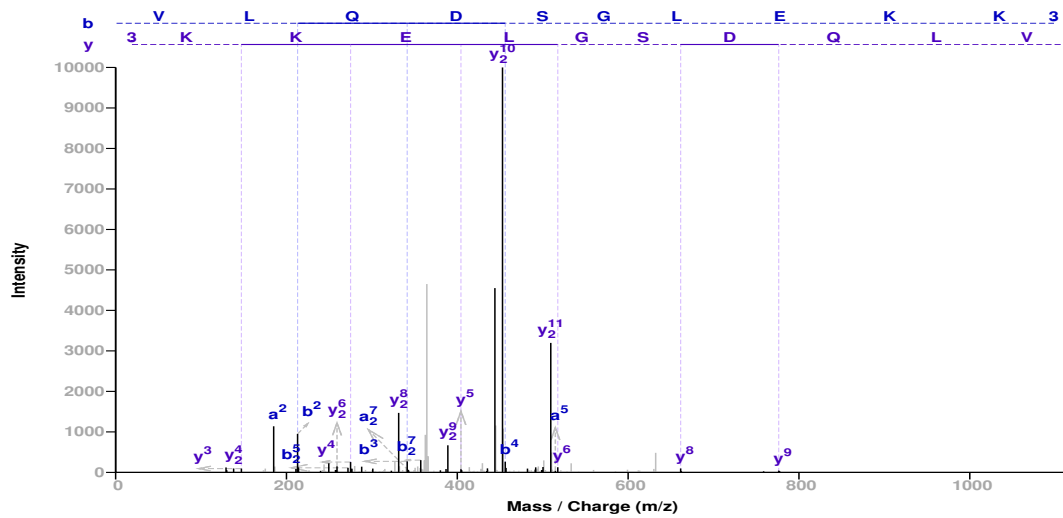

yeast0\_Scan\_Number\_4075 Precursor m/z: 556.813 cosine: 0.811  $\alpha$ : 0.517

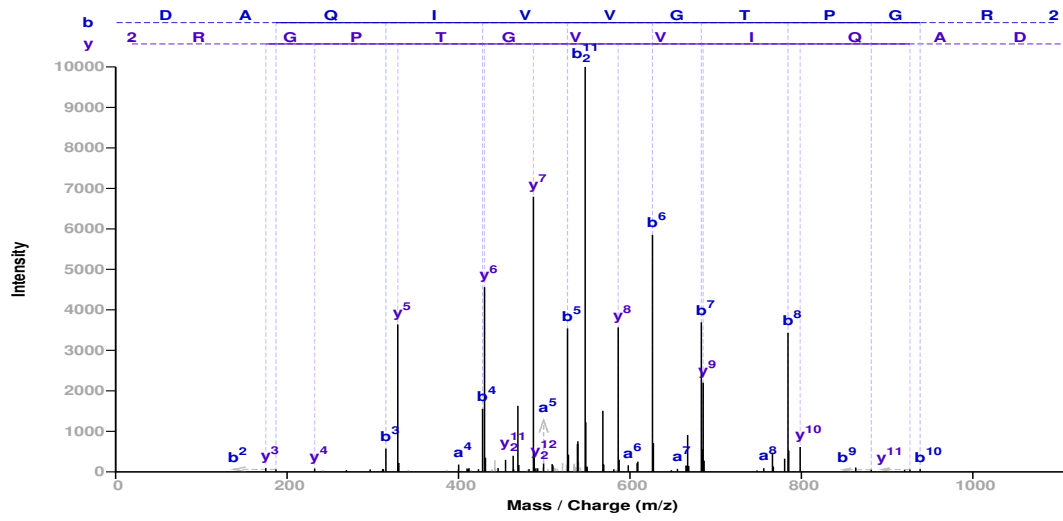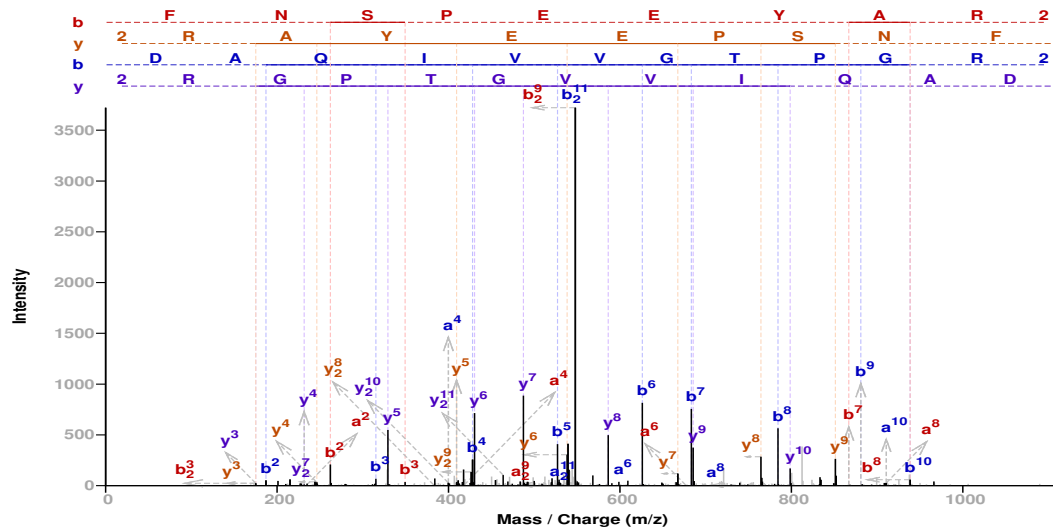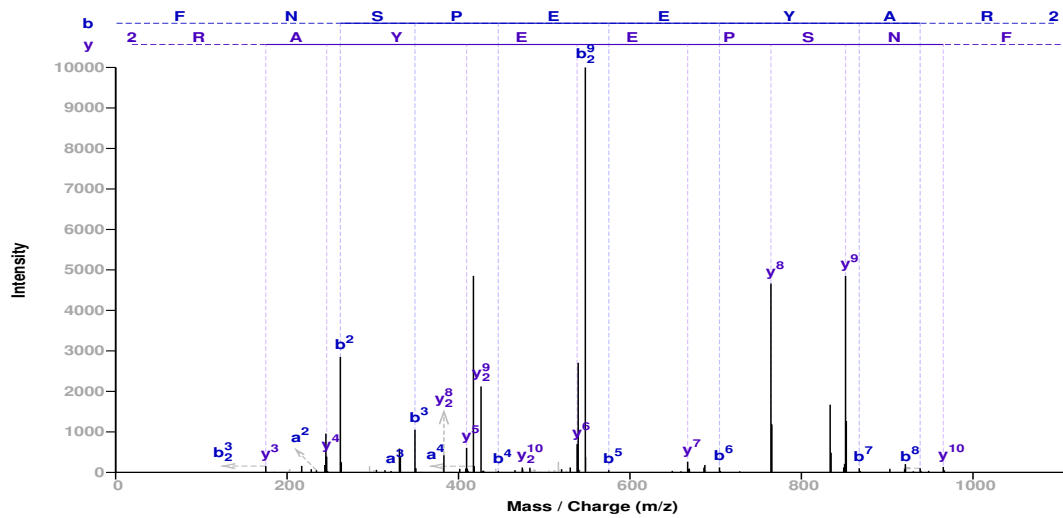

yeast0\_Scan\_Number\_2066 Precursor m/z: 515.791 cosine: 0.867  $\alpha$ : 0.512

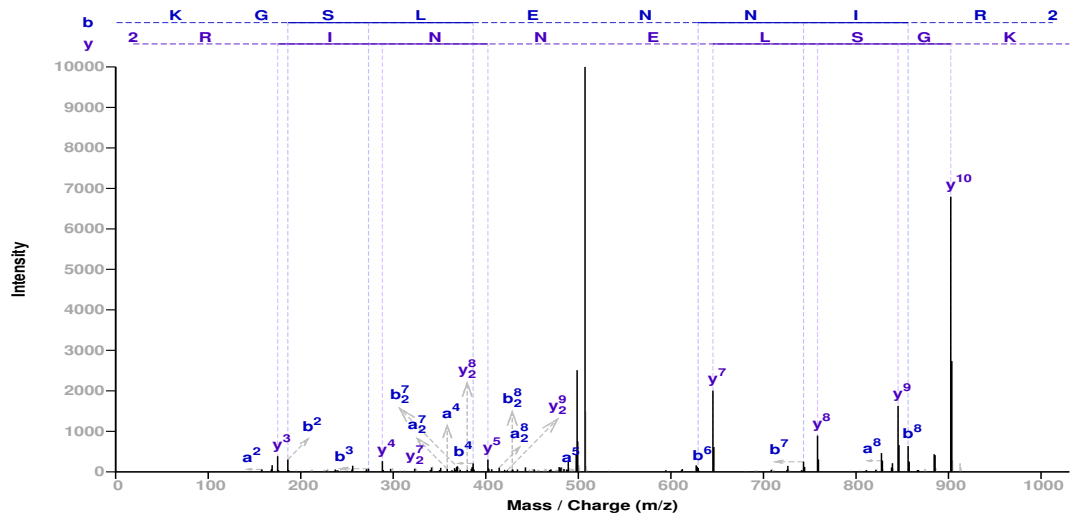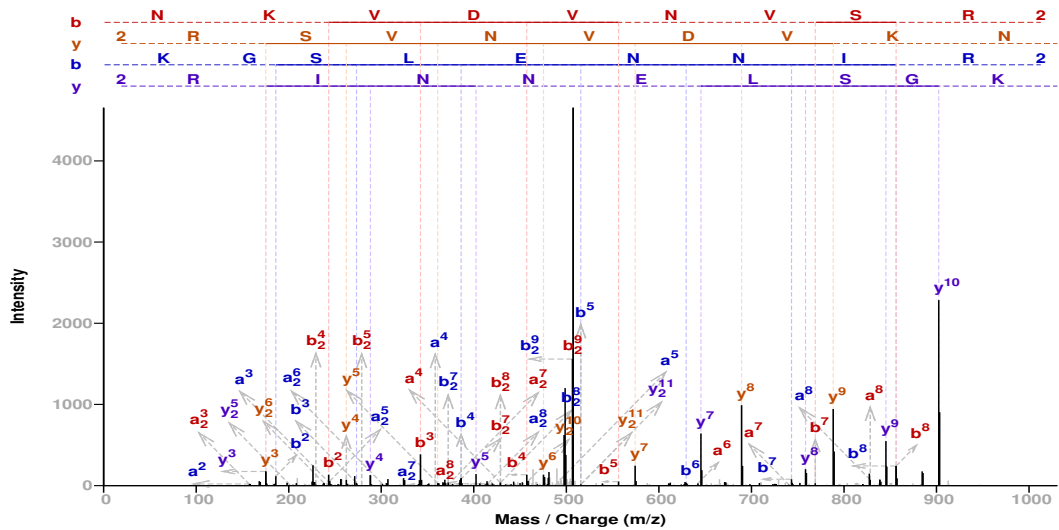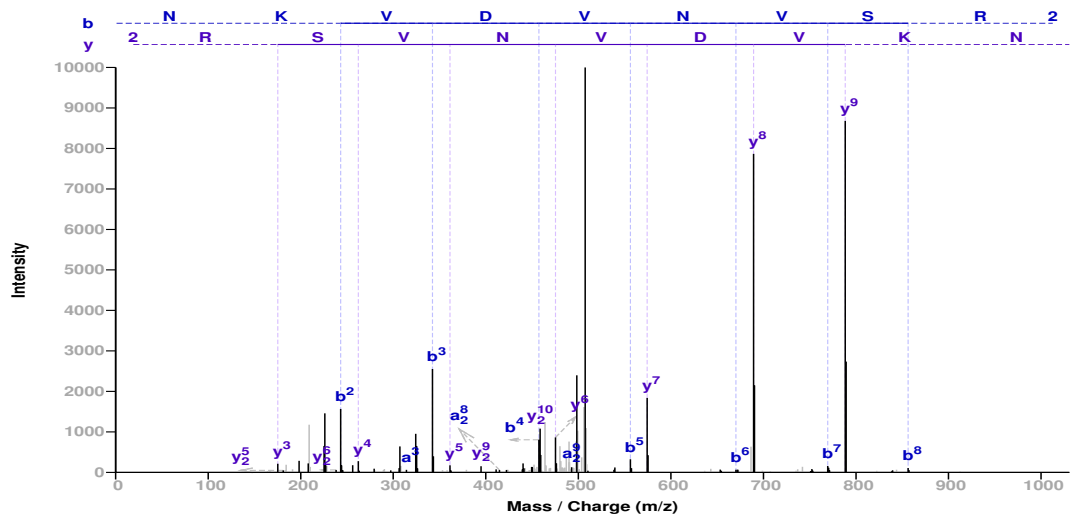

yeast0.Scan\_Number\_3540 Precursor m/z: 354.704 cosine: 0.940  $\alpha$ : 0.507

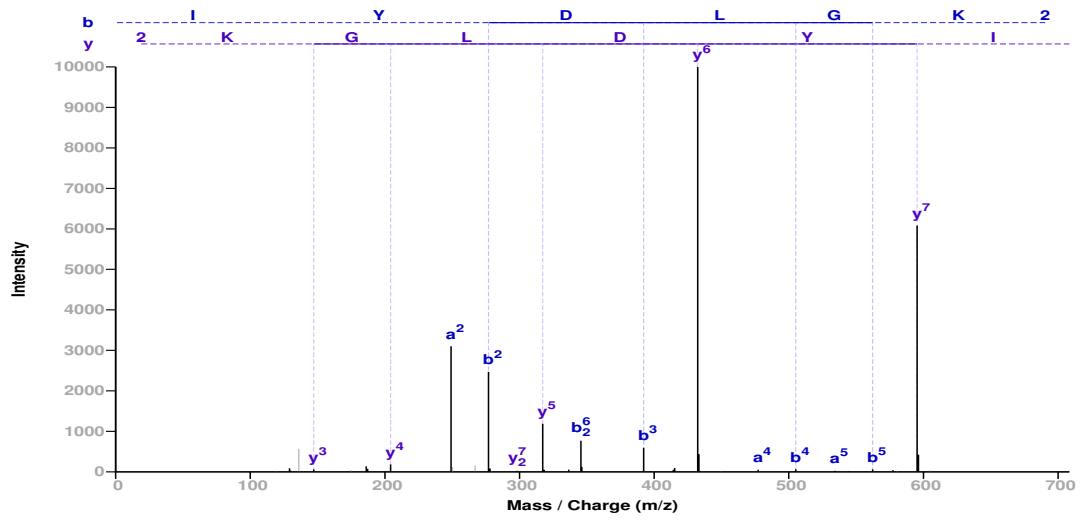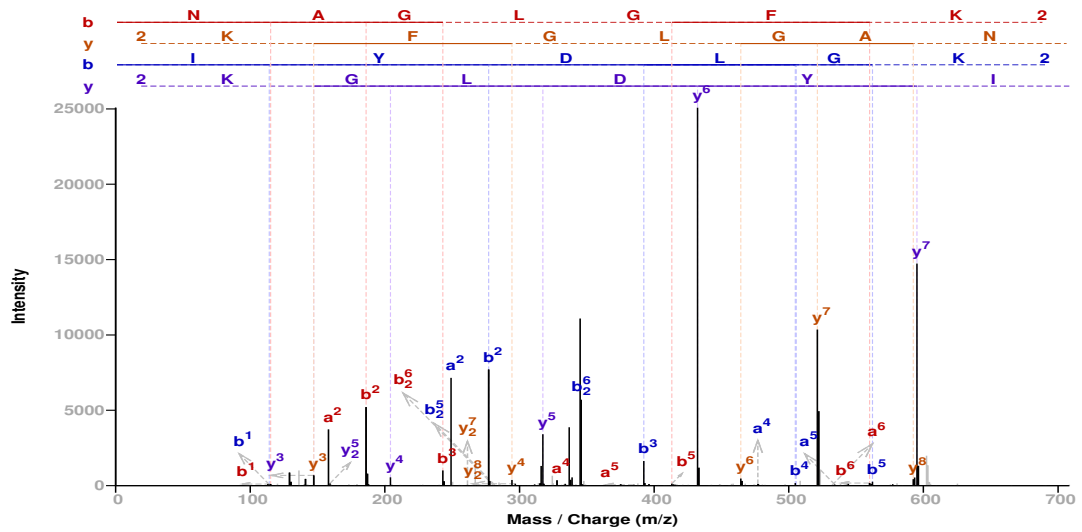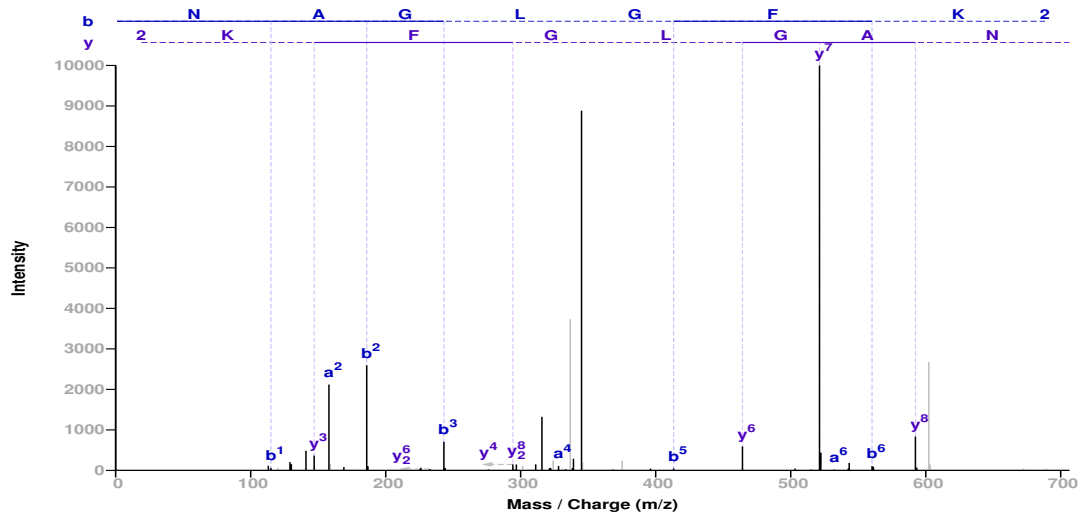

yeast0.Scan\_Number\_4279 Precursor m/z: 571.302 cosine: 0.763  $\alpha$ : 0.507

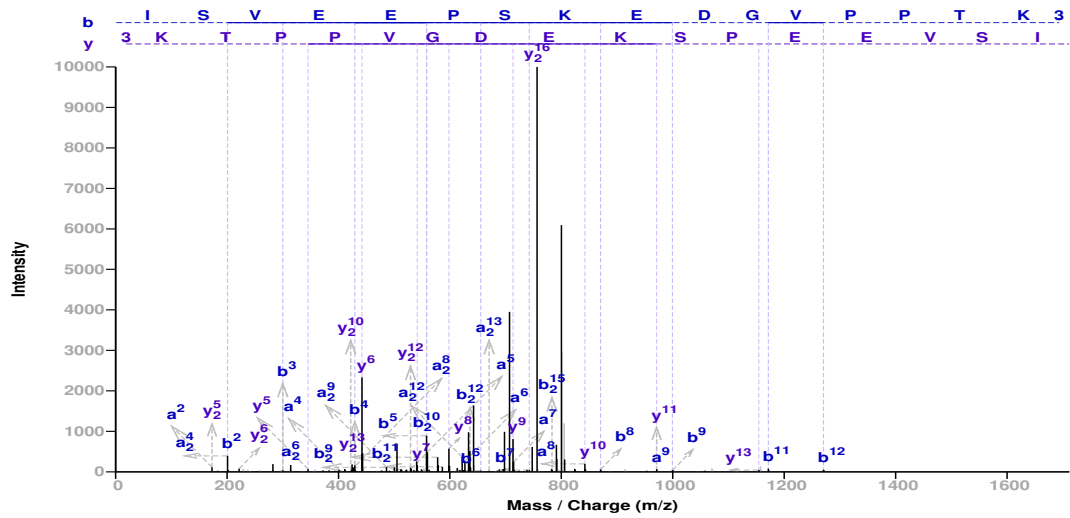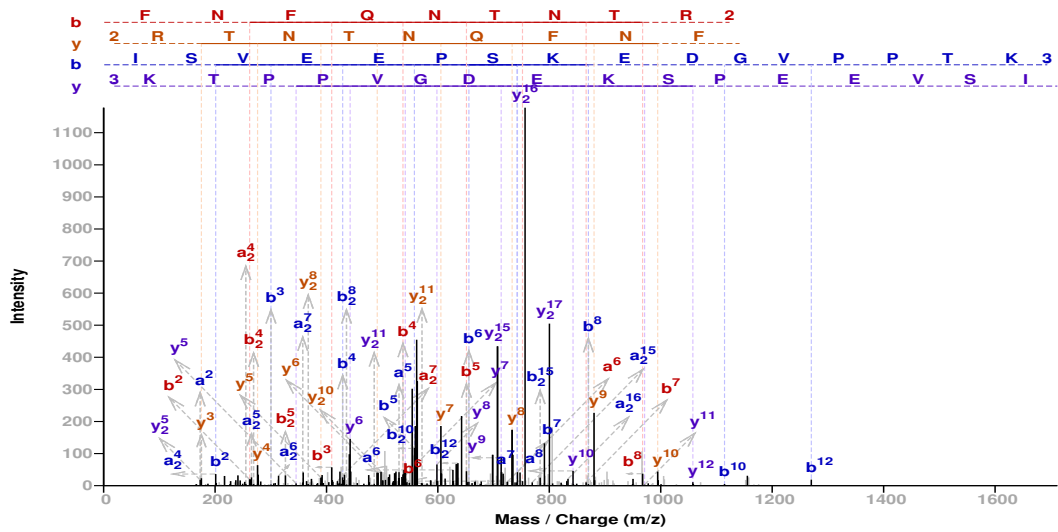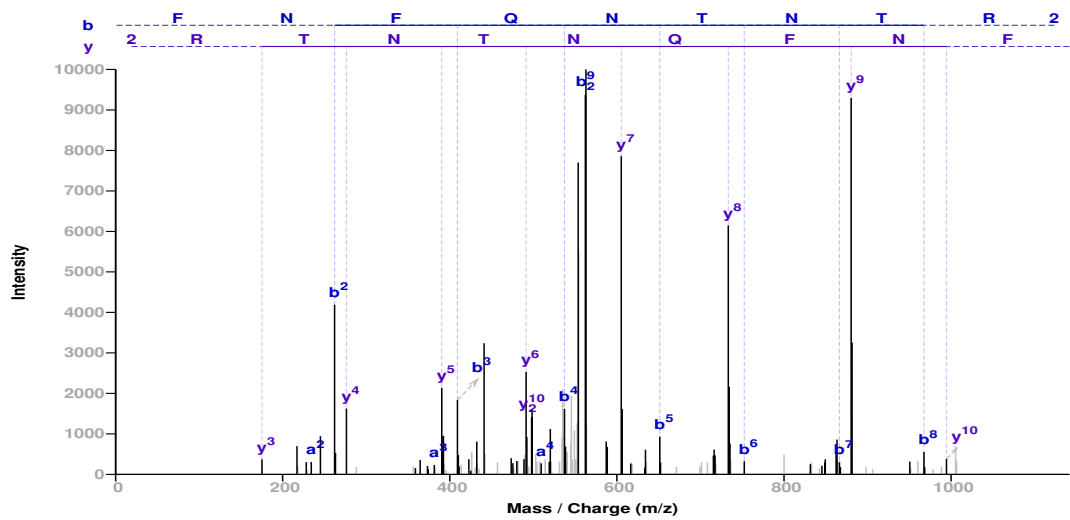

yeast0.Scan\_Number\_2915 Precursor m/z: 574.780 cosine: 0.768  $\alpha$ : 0.506

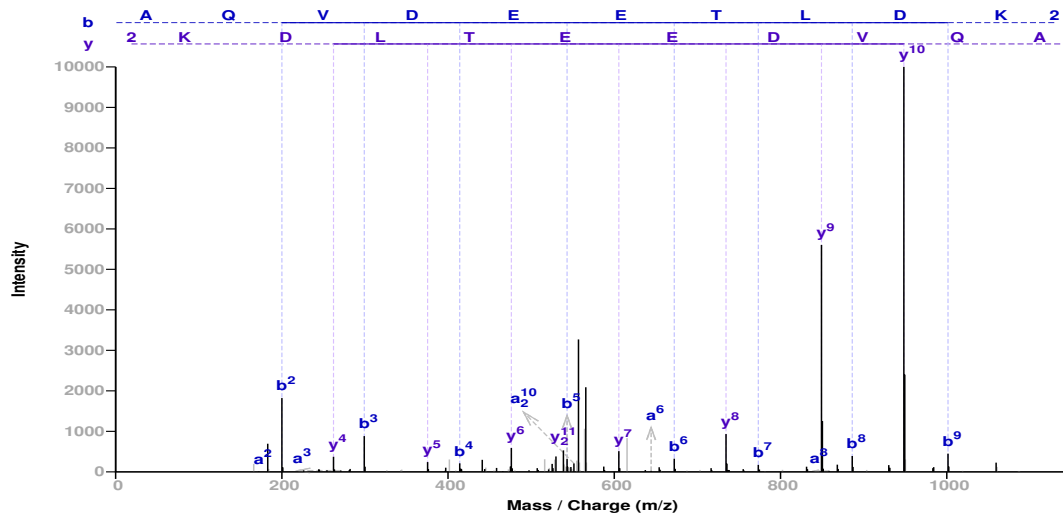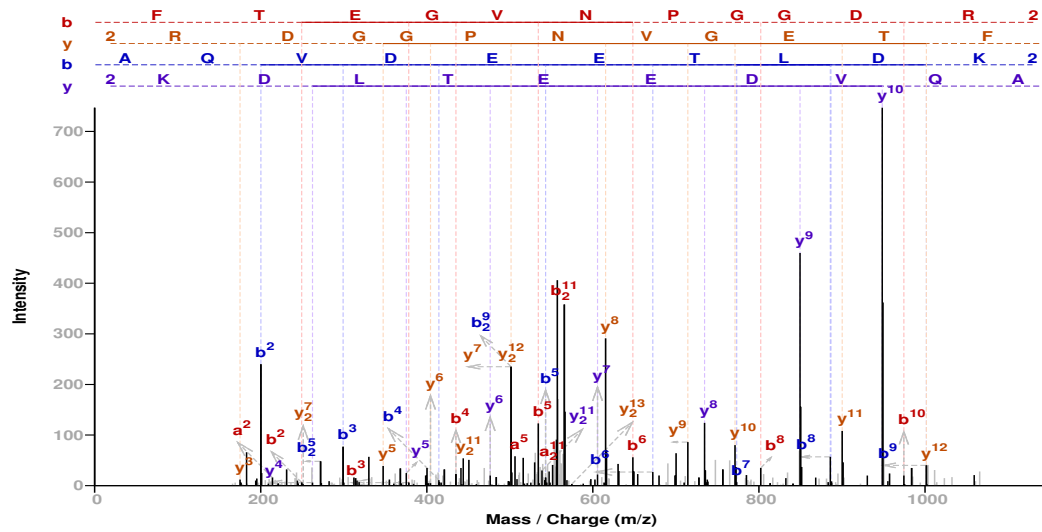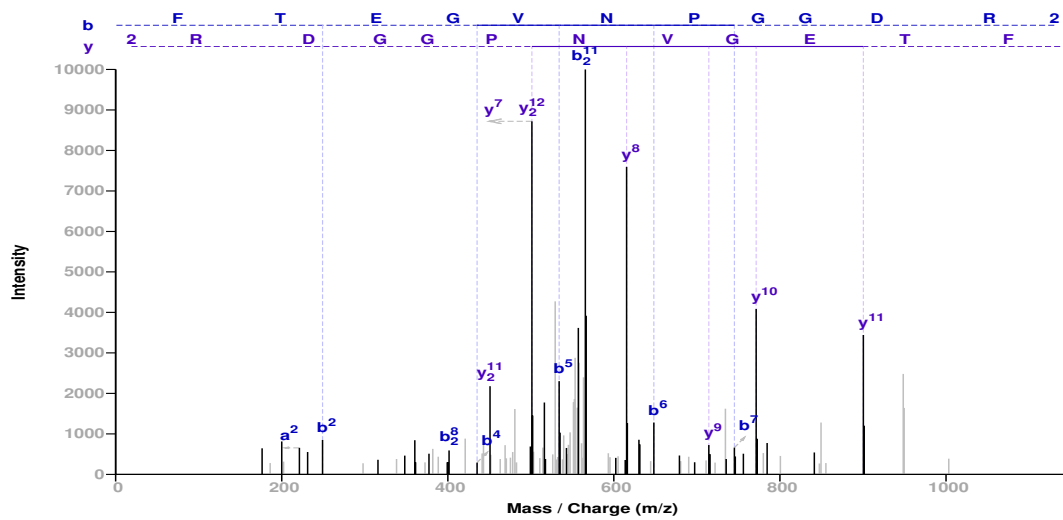



yeast0\_Scan\_Number\_2625 Precursor m/z: 388.223 cosine: 0.867  $\alpha$ : 0.505

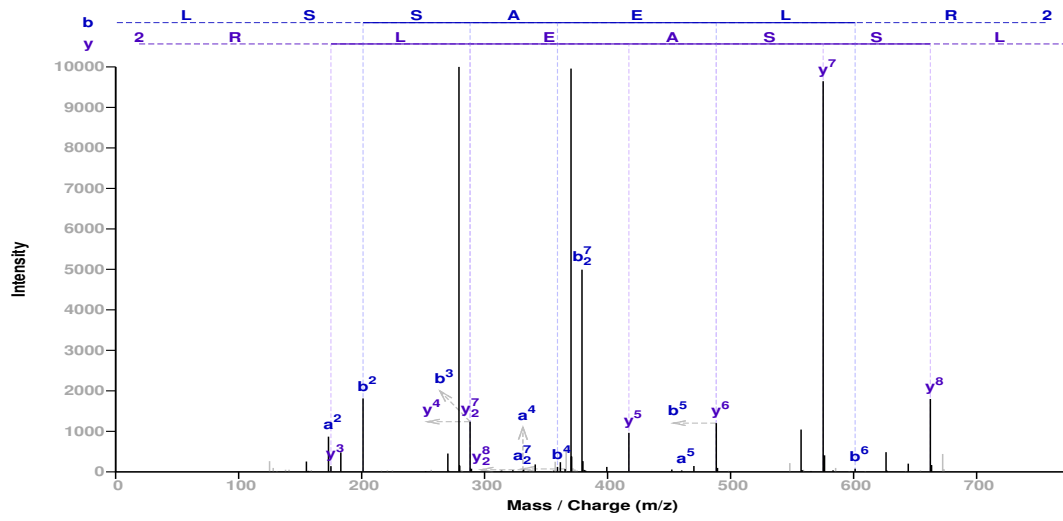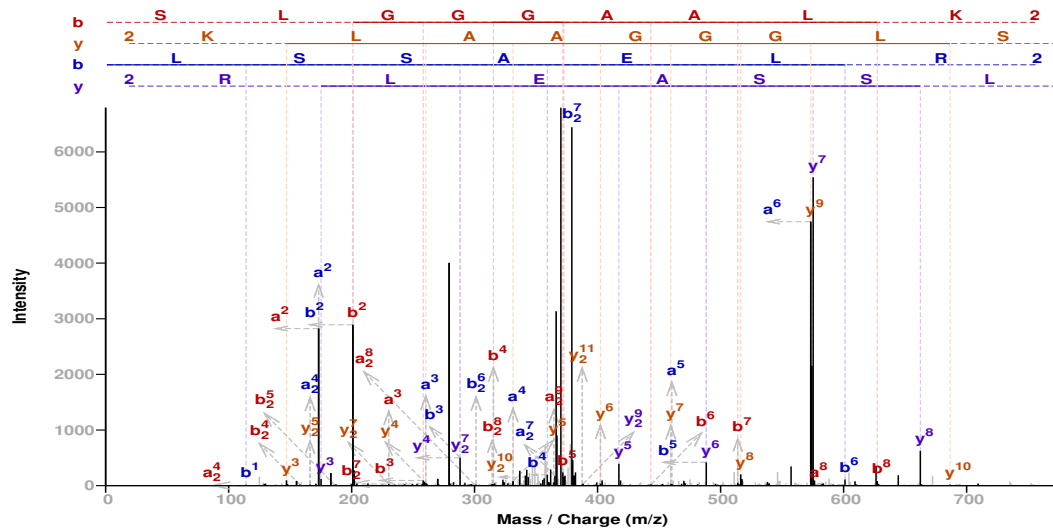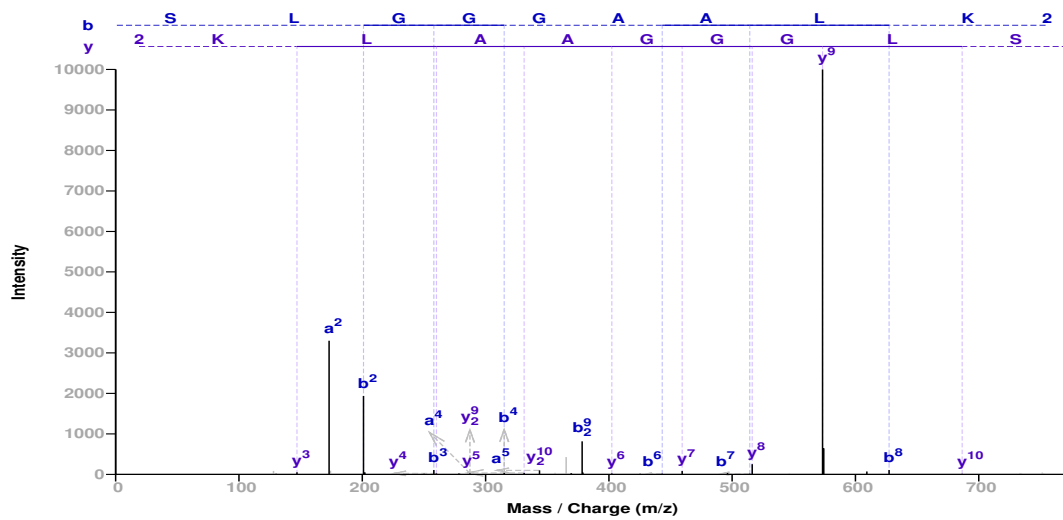

yeast0\_Scan\_Number\_6487 Precursor m/z: 558.800 cosine: 0.785  $\alpha$ : 0.504

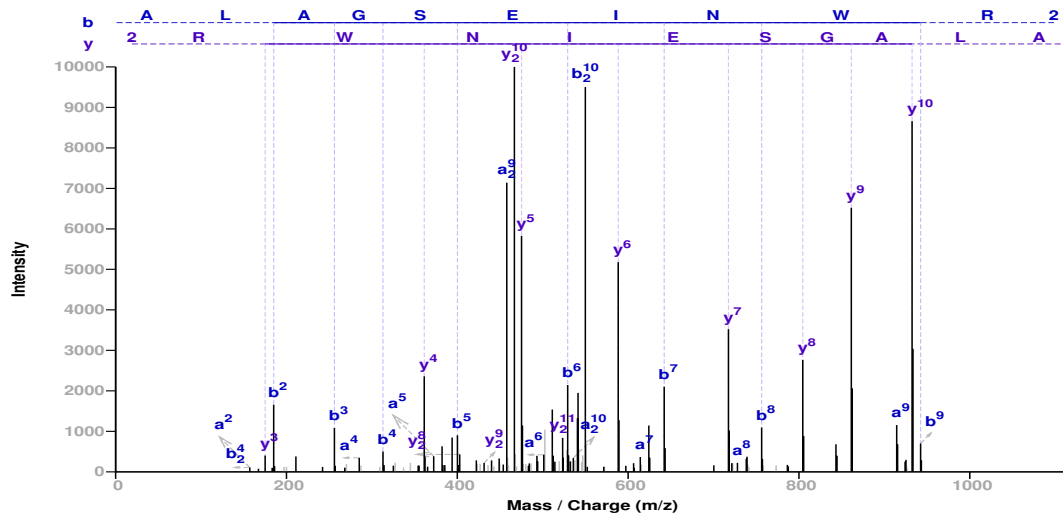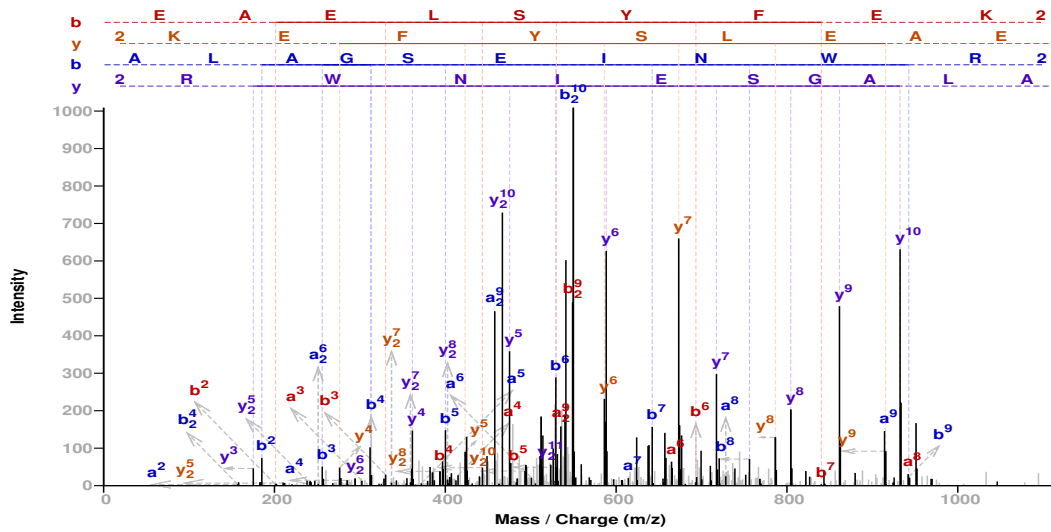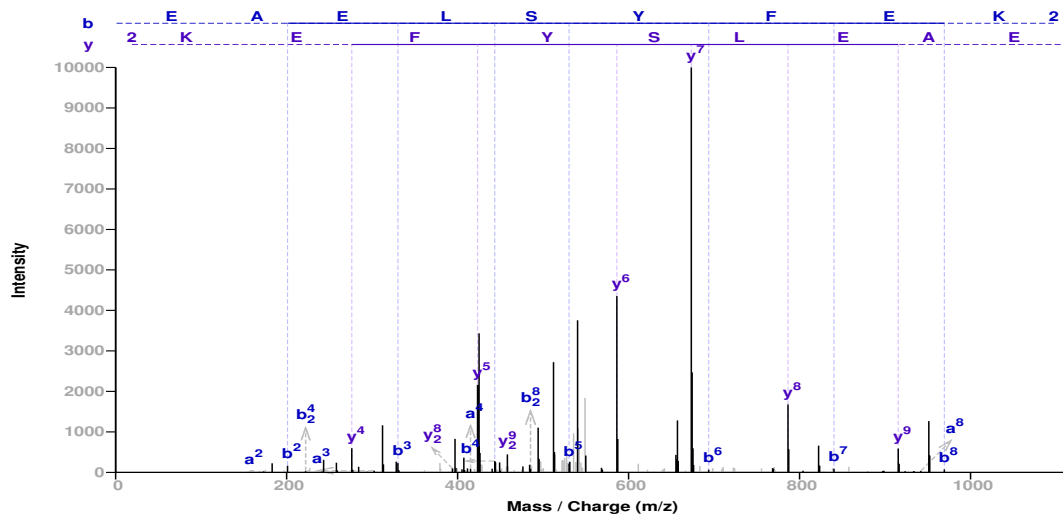

yeast0.Scan\_Number\_7303 Precursor m/z: 443.227 cosine: 0.734  $\alpha$ : 0.504

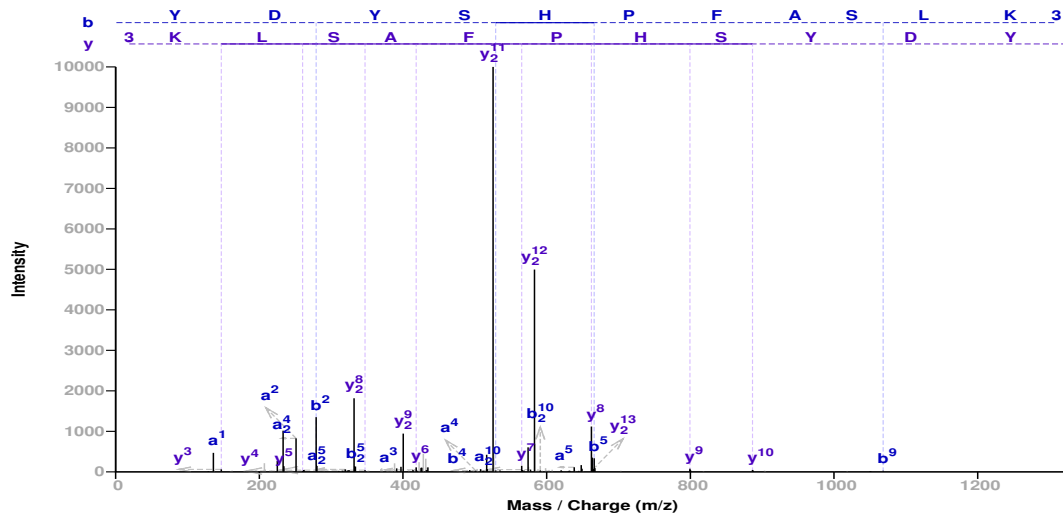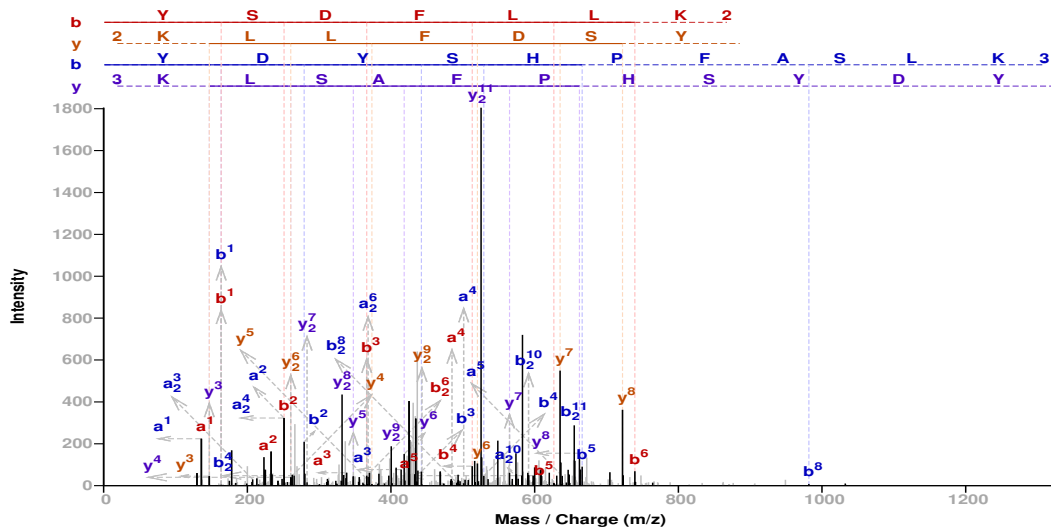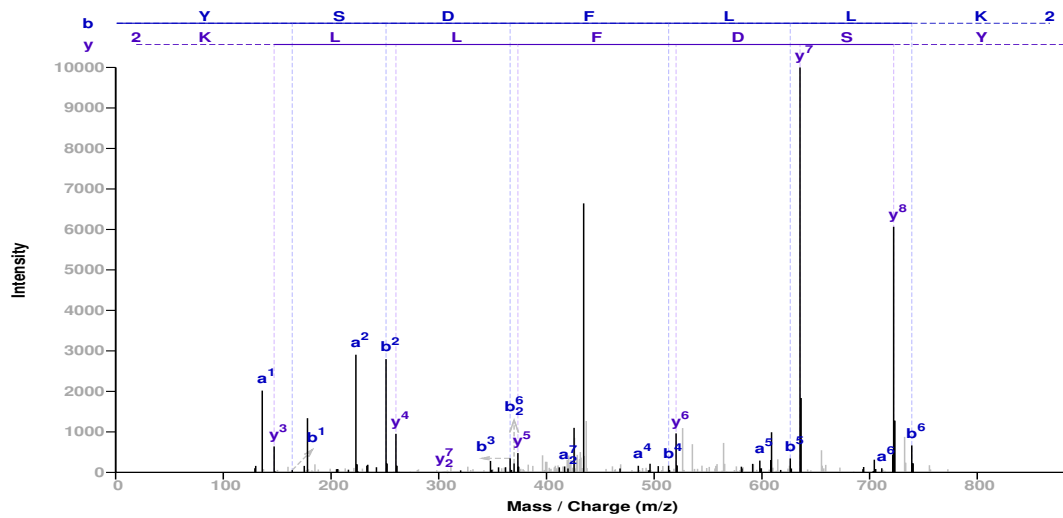

yeast0\_Scan\_Number\_4762 Precursor m/z: 449.781 cosine: 0.802  $\alpha$ : 0.502

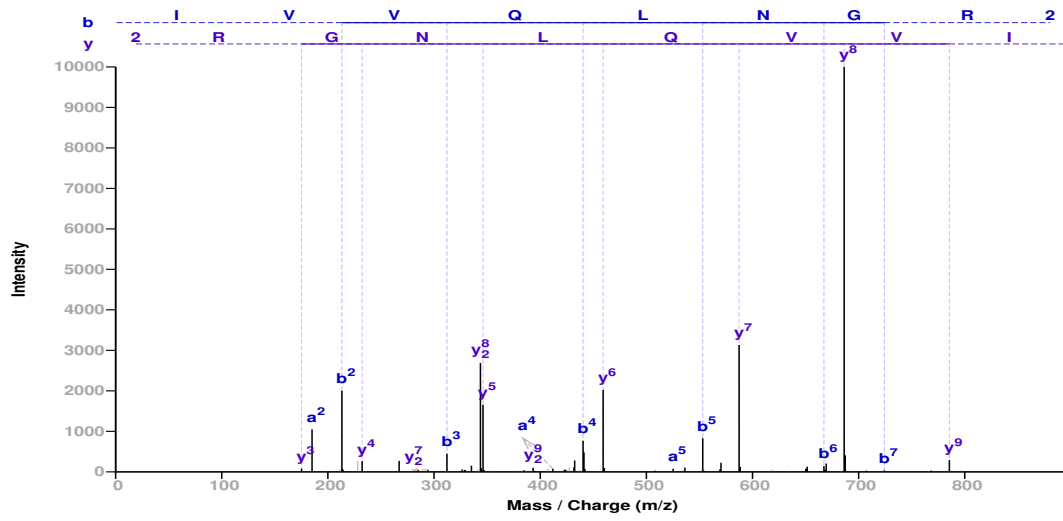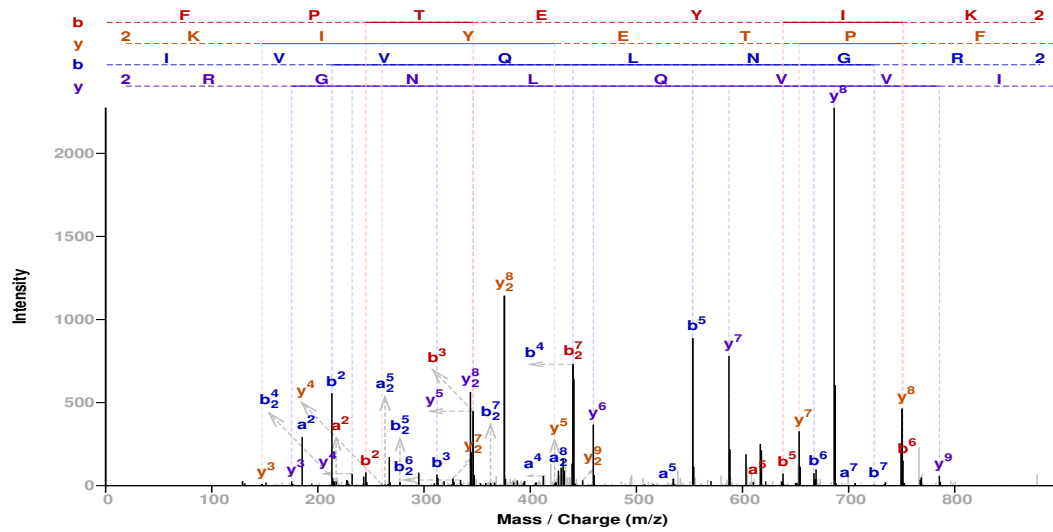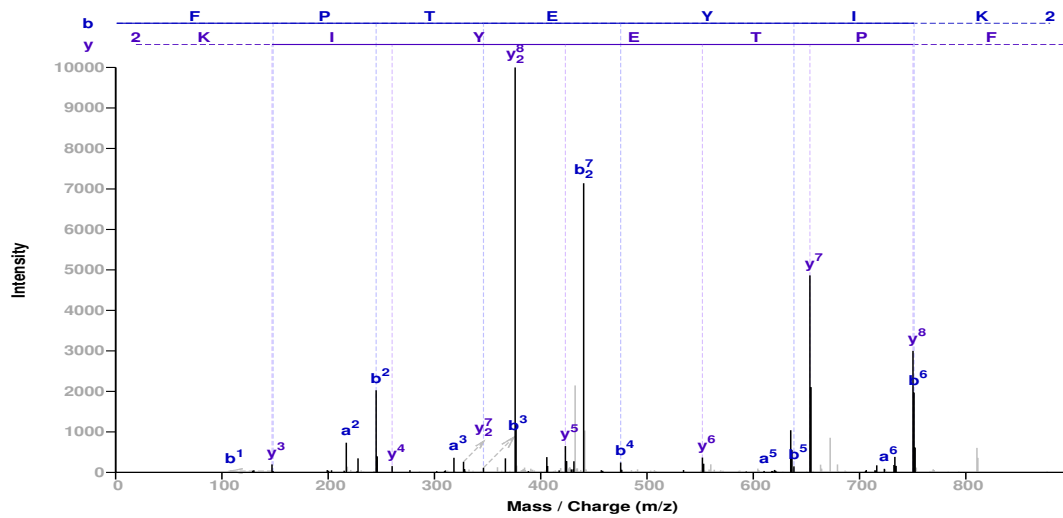

yeast0.Scan\_Number\_4364 Precursor m/z: 455.244 cosine: 0.753  $\alpha$ : 0.500

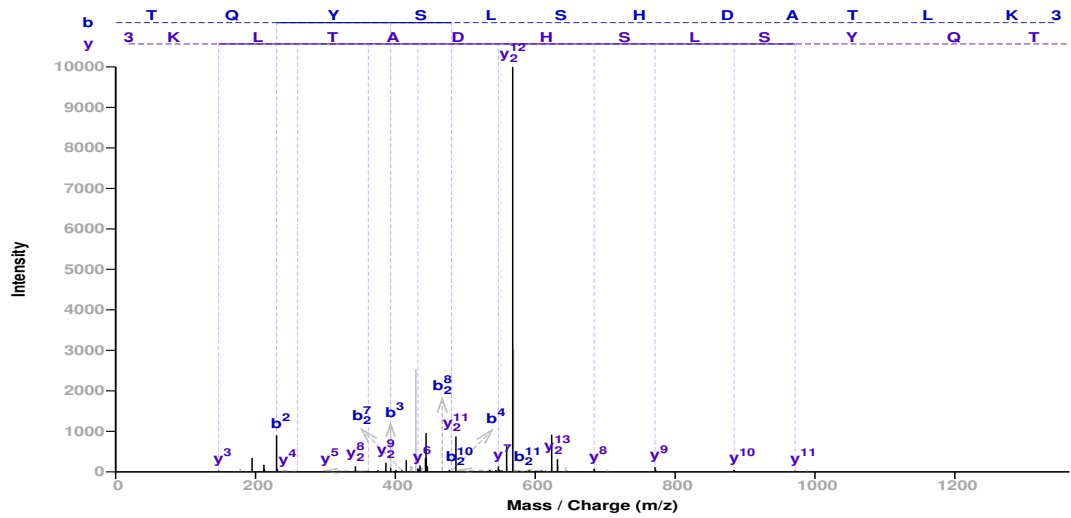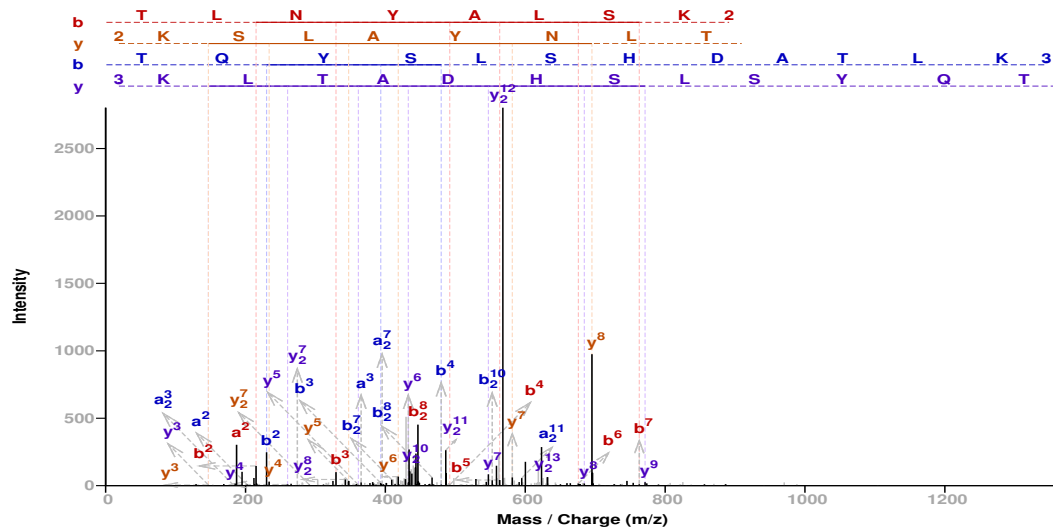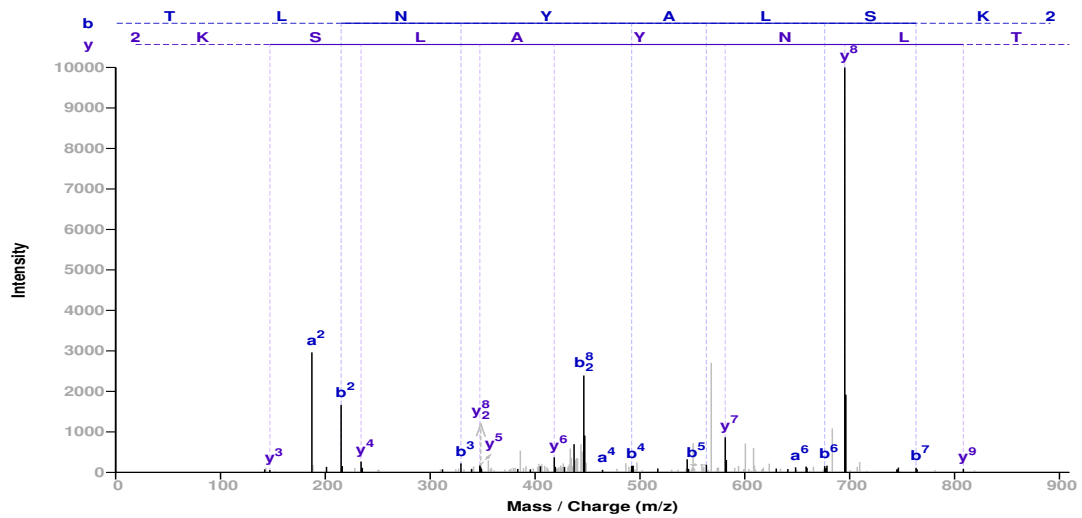

yeast0.Scan\_Number\_2976 Precursor m/z: 404.227 cosine: 0.731  $\alpha$ : 0.499

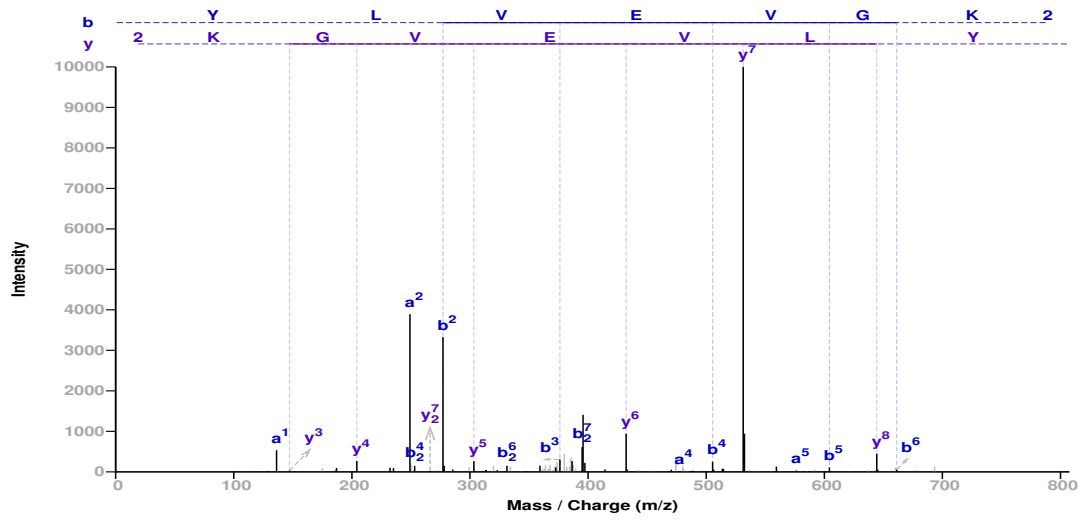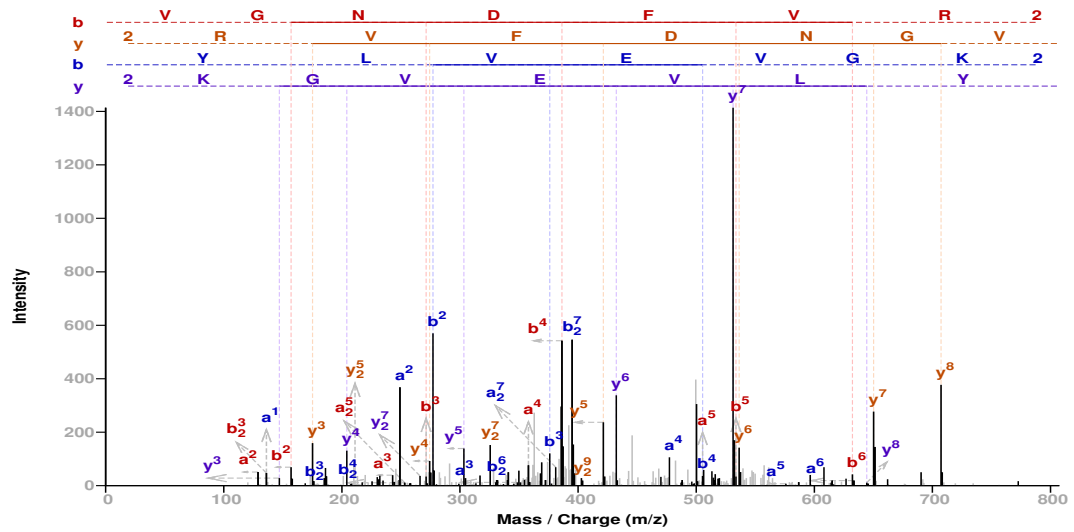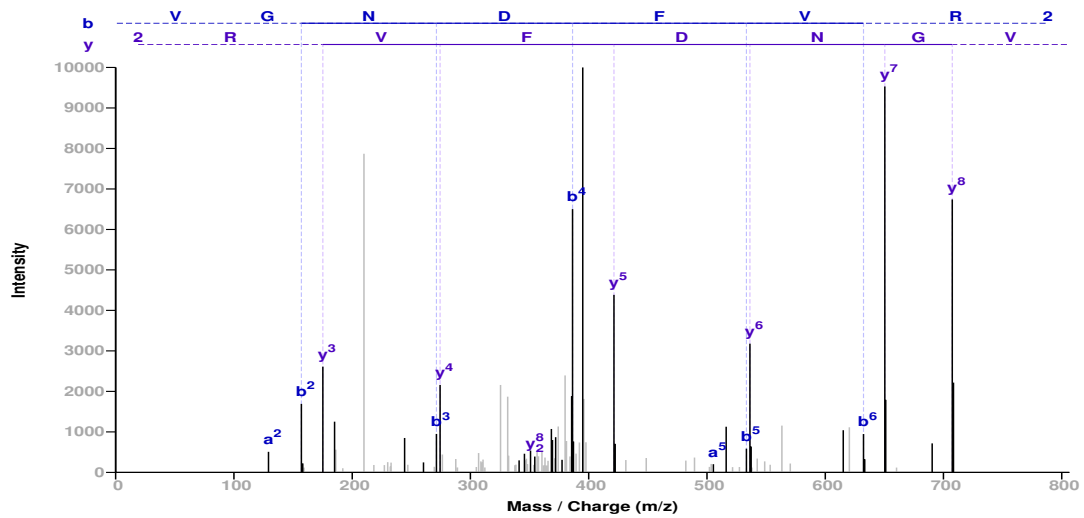

yeast0.Scan\_Number\_6973 Precursor m/z: 544.323 cosine: 0.757  $\alpha$ : 0.498

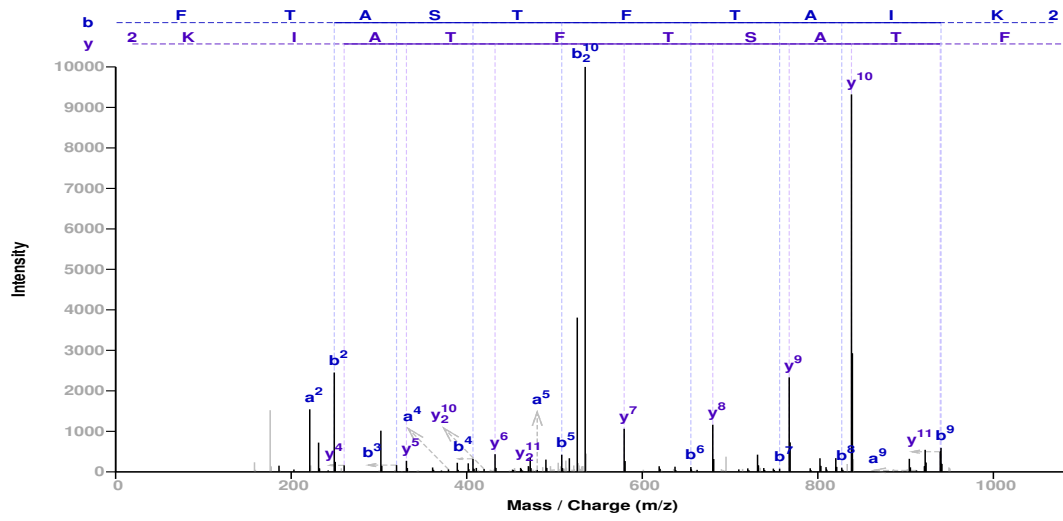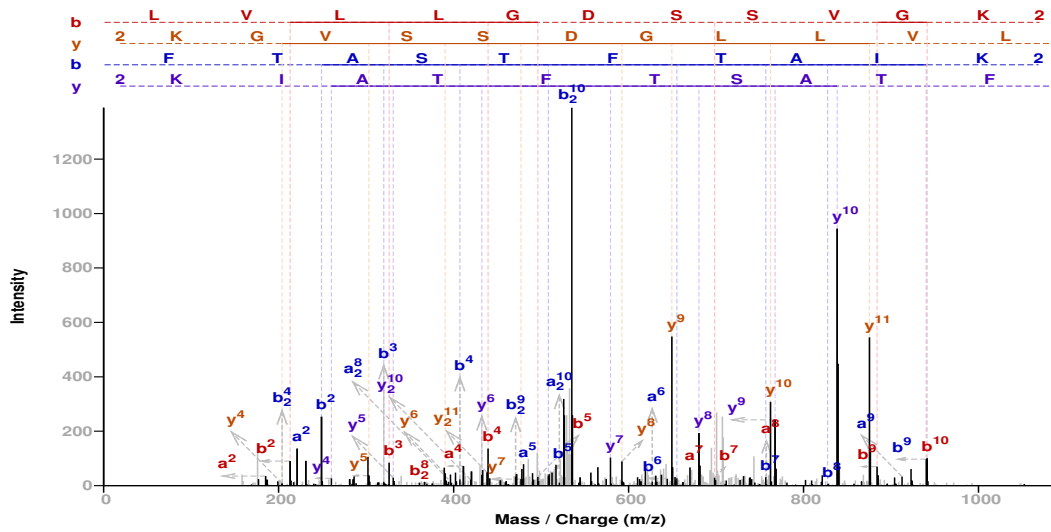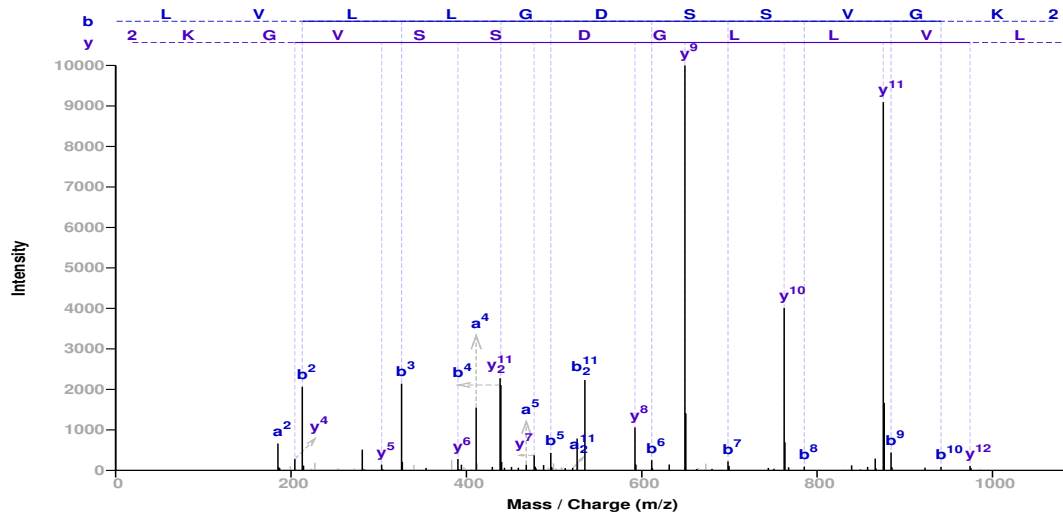

yeast0\_Scan\_Number\_3855 Precursor m/z: 343.238 cosine: 0.858  $\alpha$ : 0.498

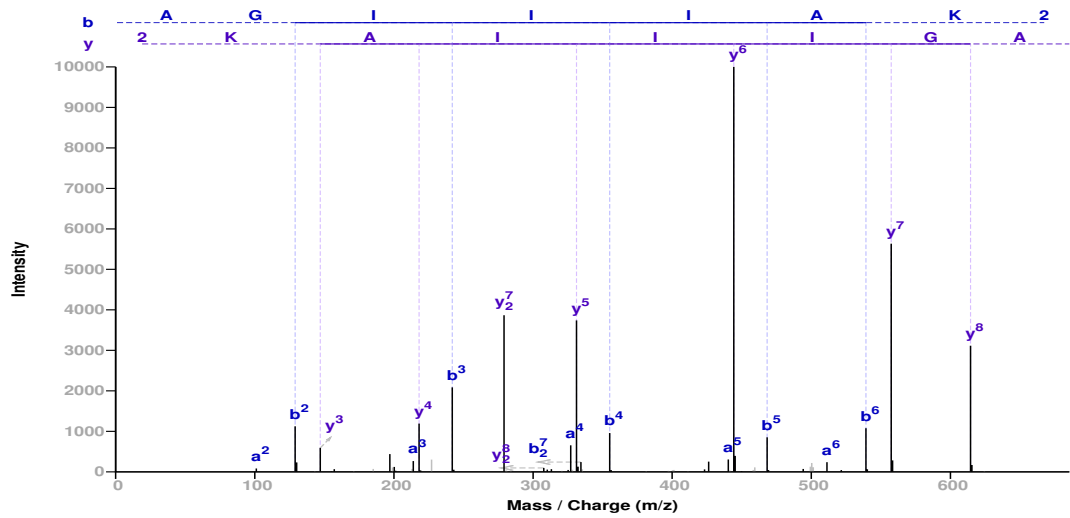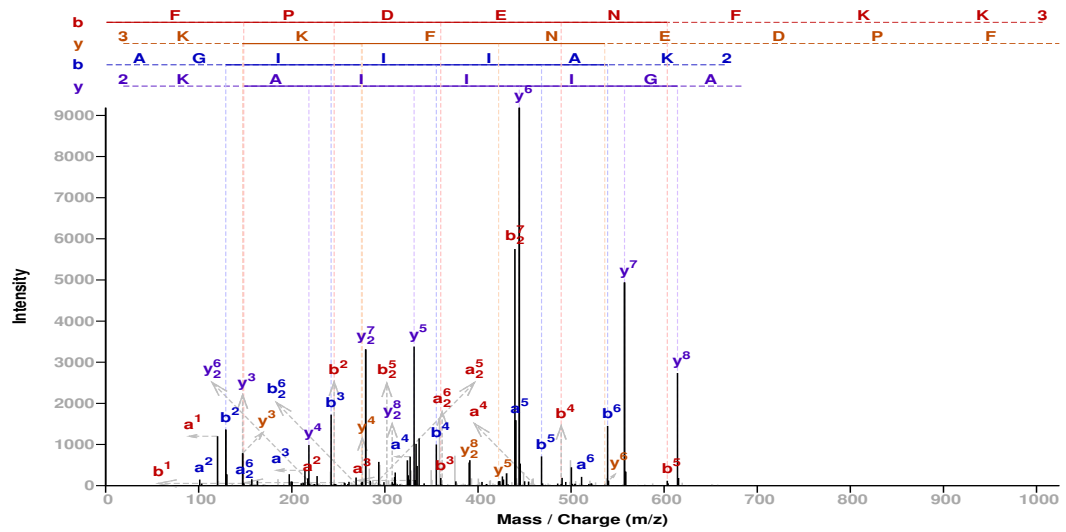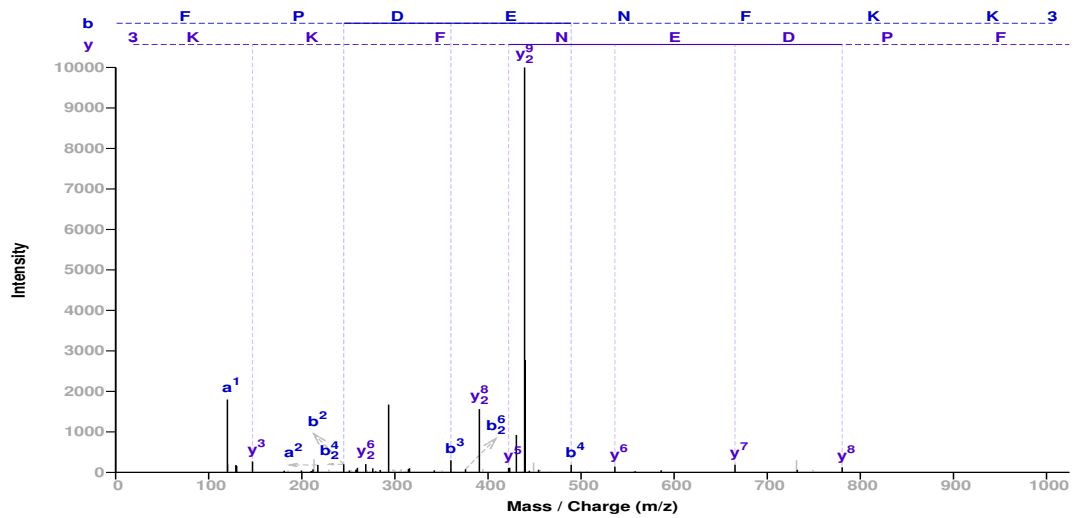



yeast0.Scan\_Number\_3784 Precursor m/z: 437.213 cosine: 0.759  $\alpha$ : 0.496

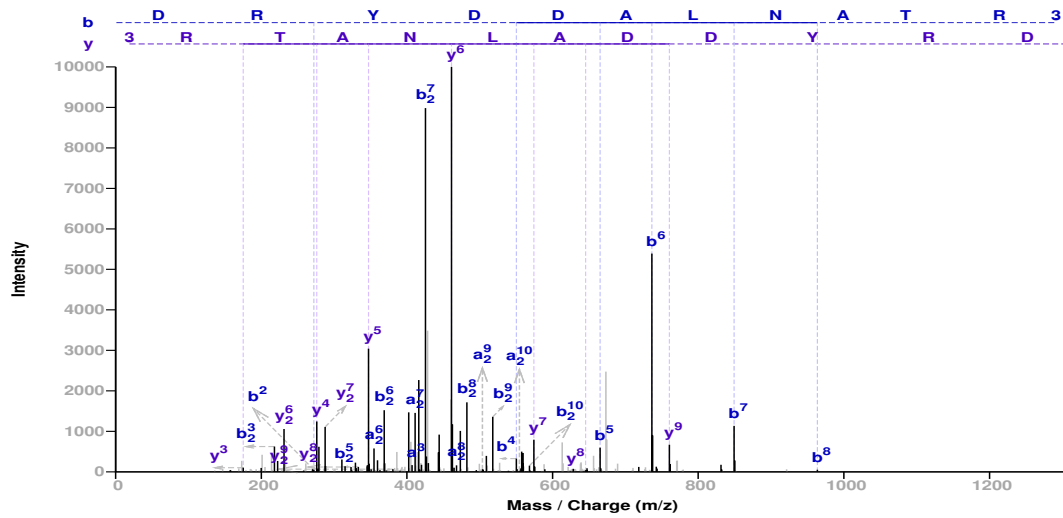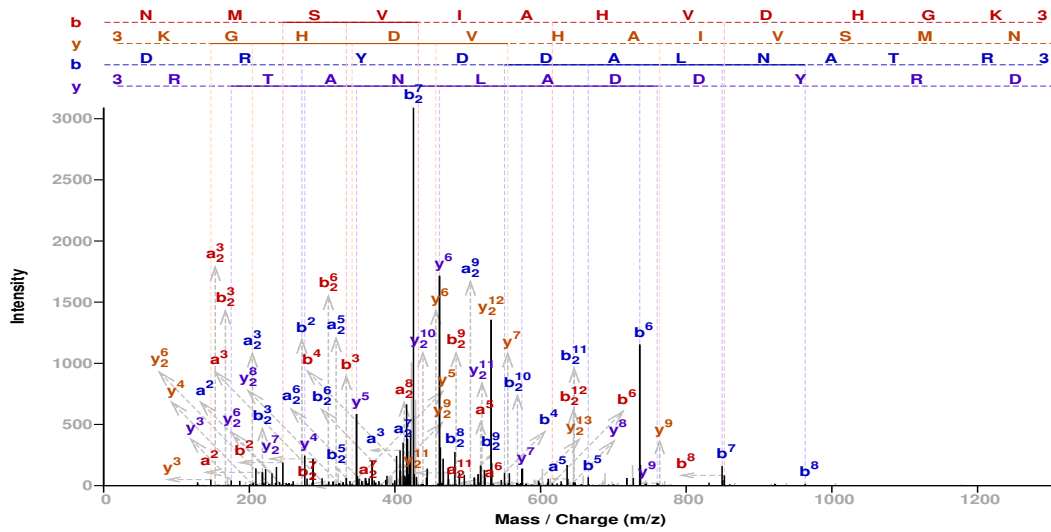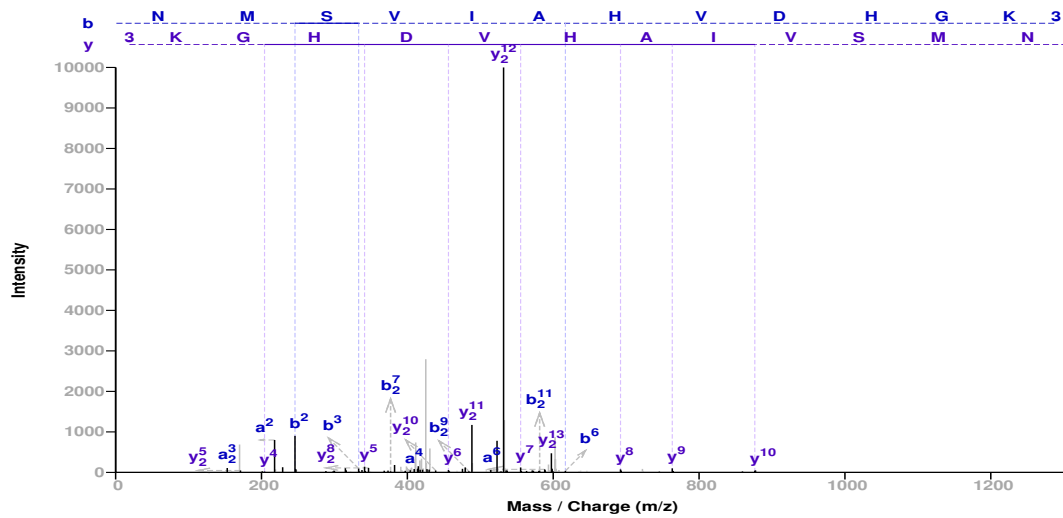

yeast0.Scan\_Number\_6931 Precursor m/z: 851.943 cosine: 0.852  $\alpha$ : 0.495

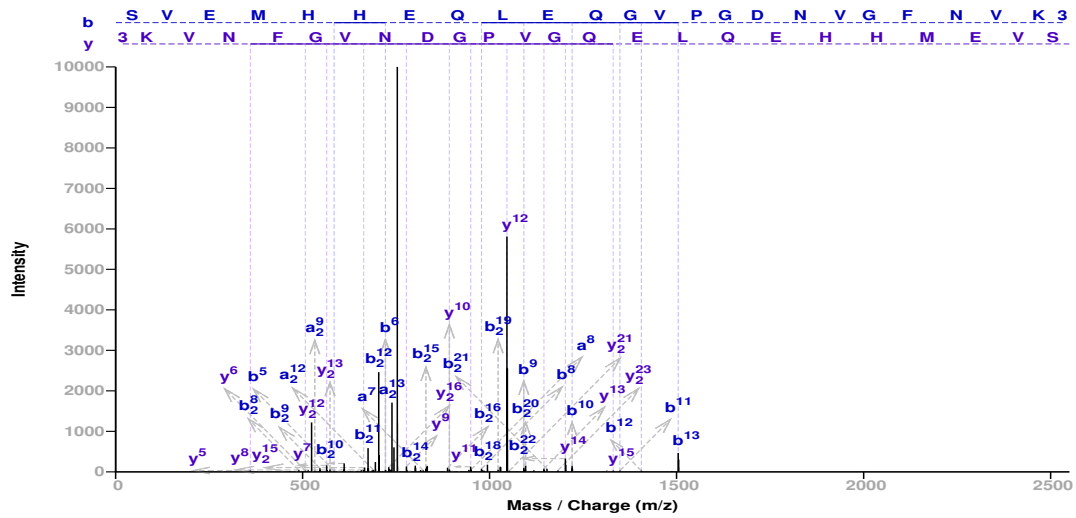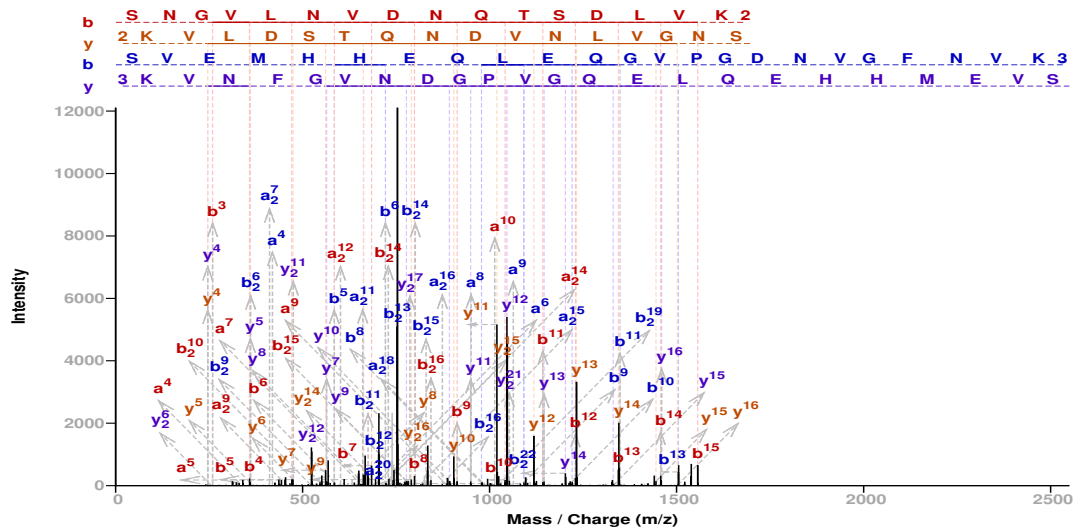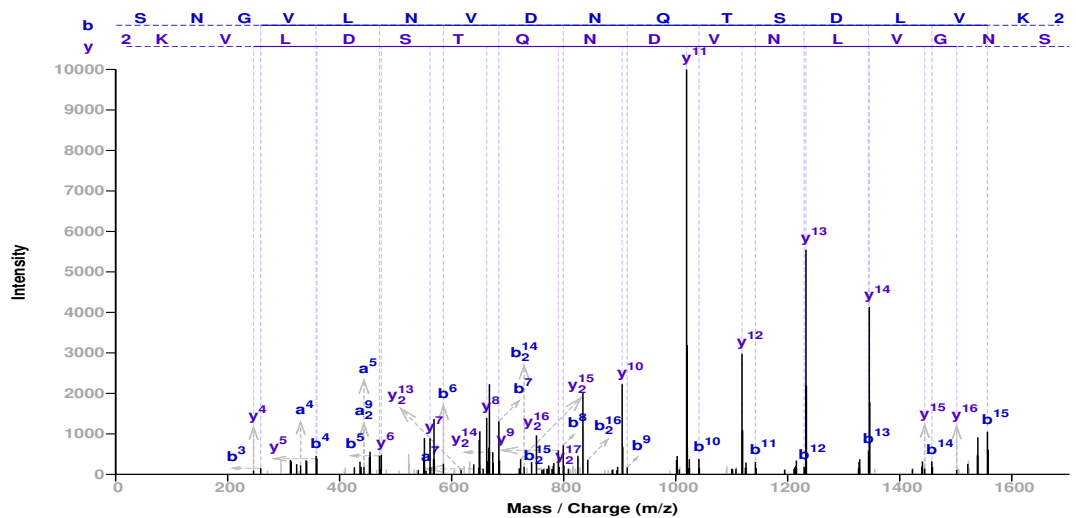

yeast0\_Scan\_Number\_5253 Precursor m/z: 453.281 cosine: 0.845  $\alpha$ : 0.486

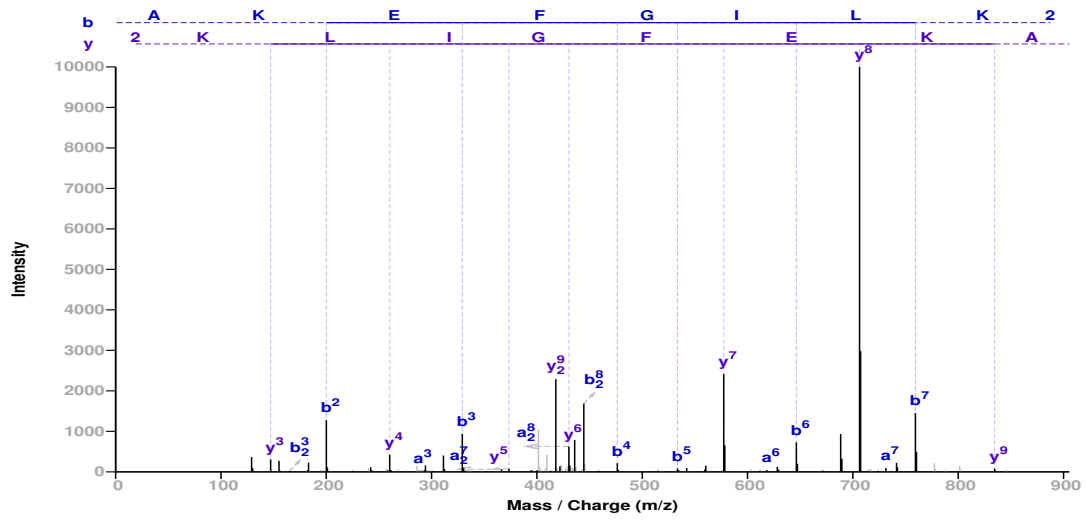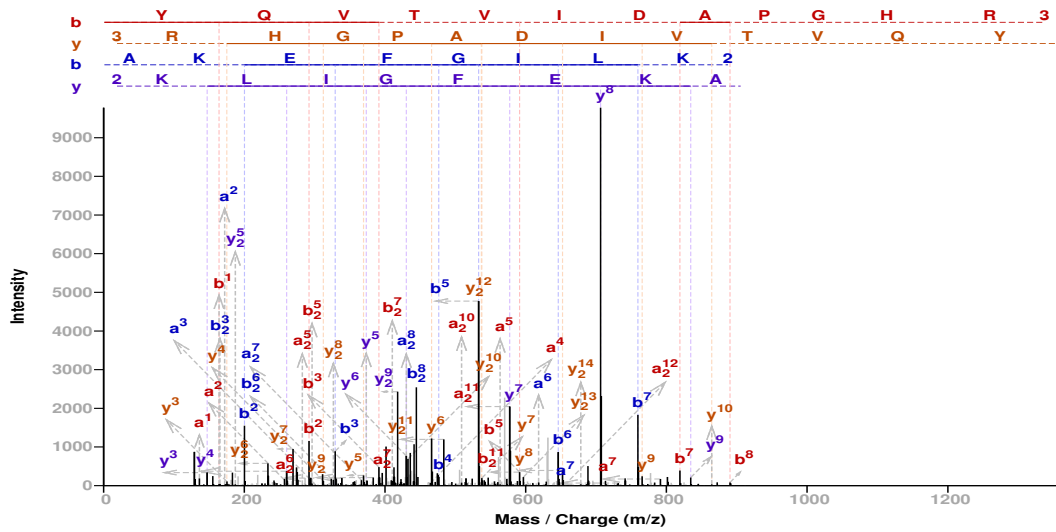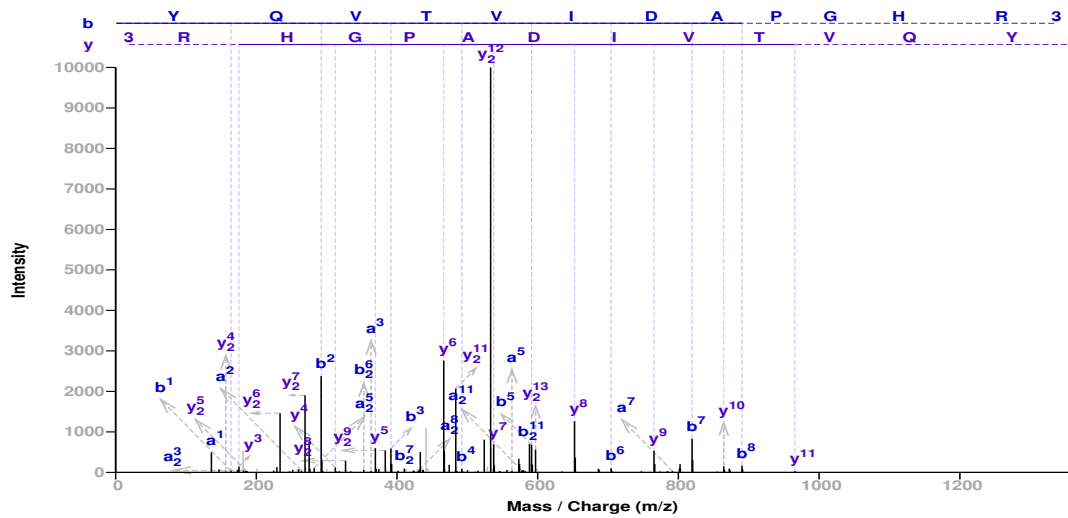

yeast0.Scan\_Number.11972 Precursor m/z: 798.922 cosine: 0.735  $\alpha$ : 0.486

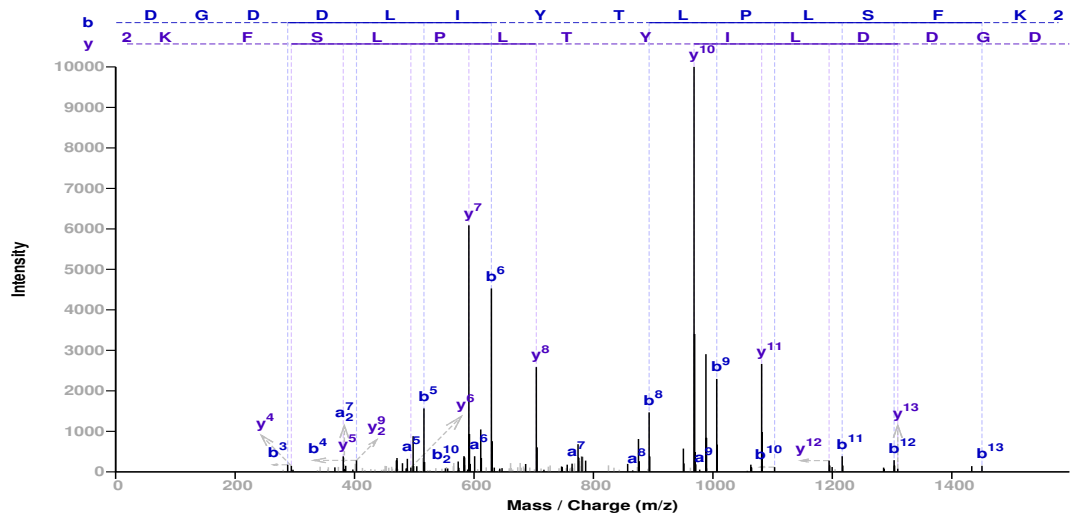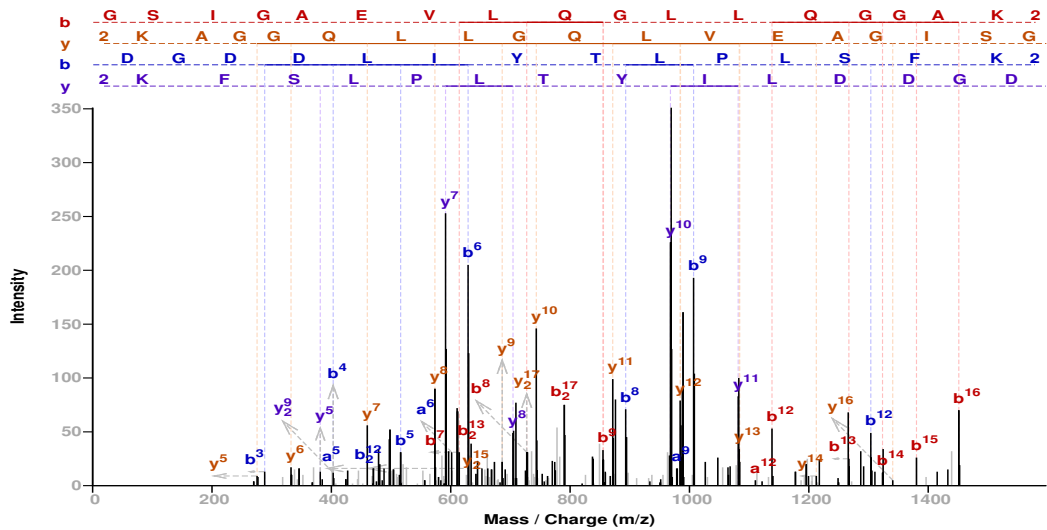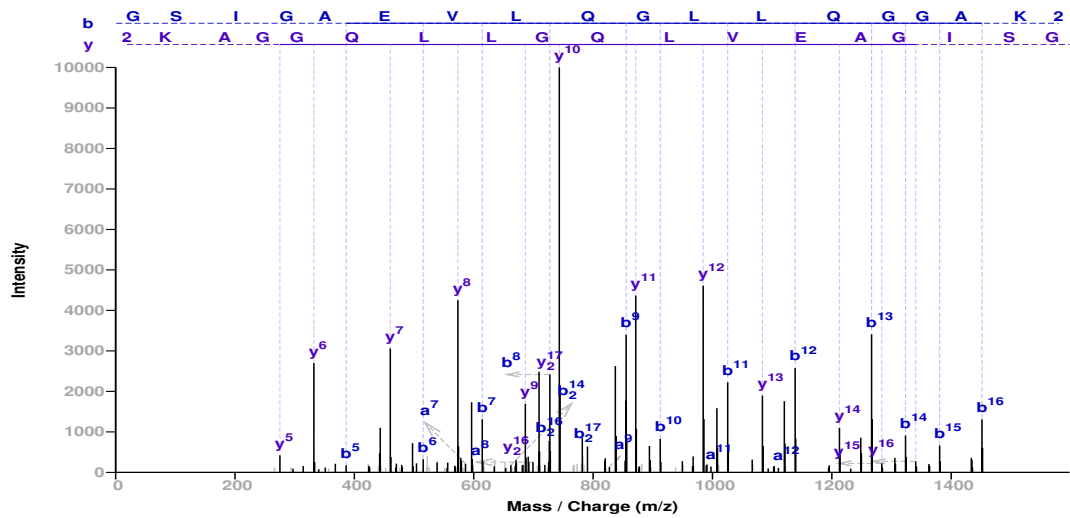

yeast0\_Scan\_Number\_3620 Precursor m/z: 382.225 cosine: 0.888  $\alpha$ : 0.484

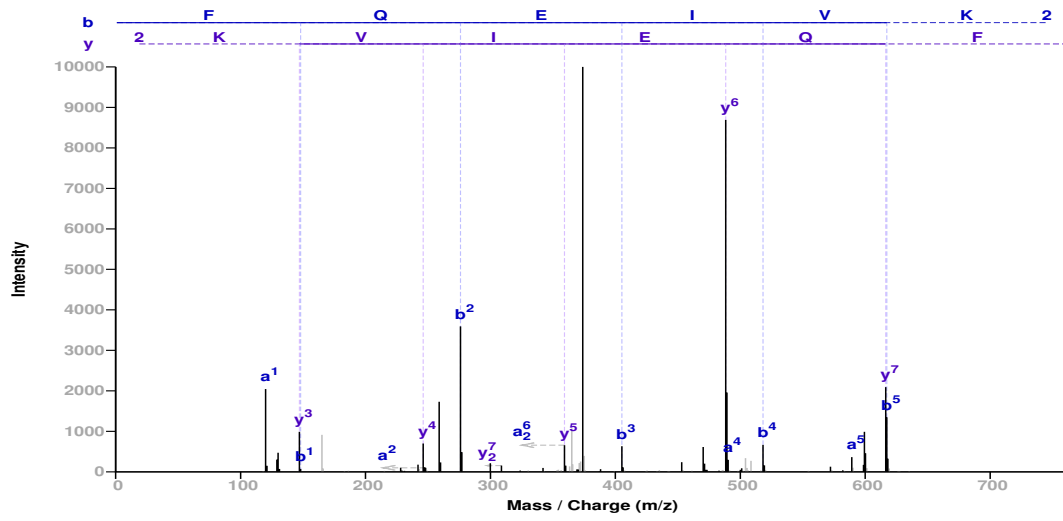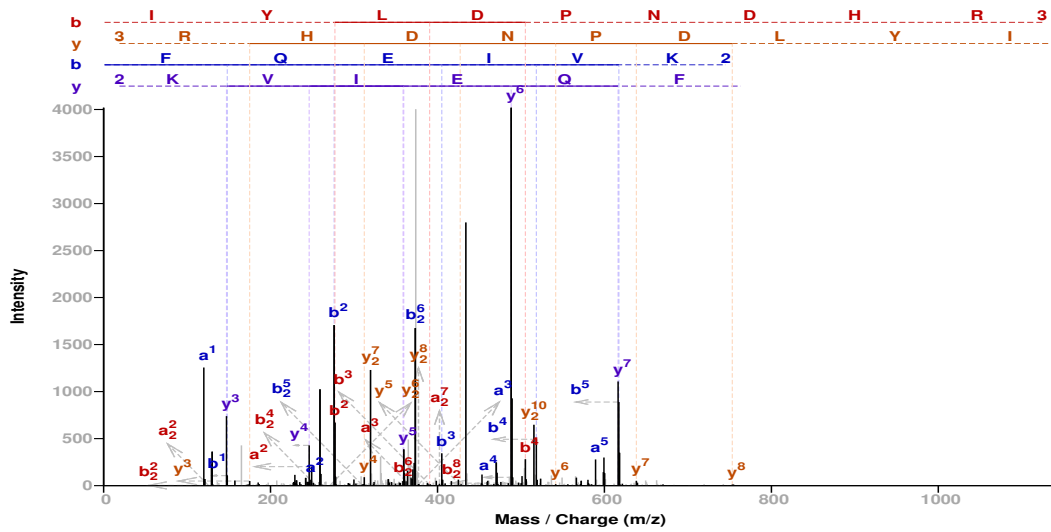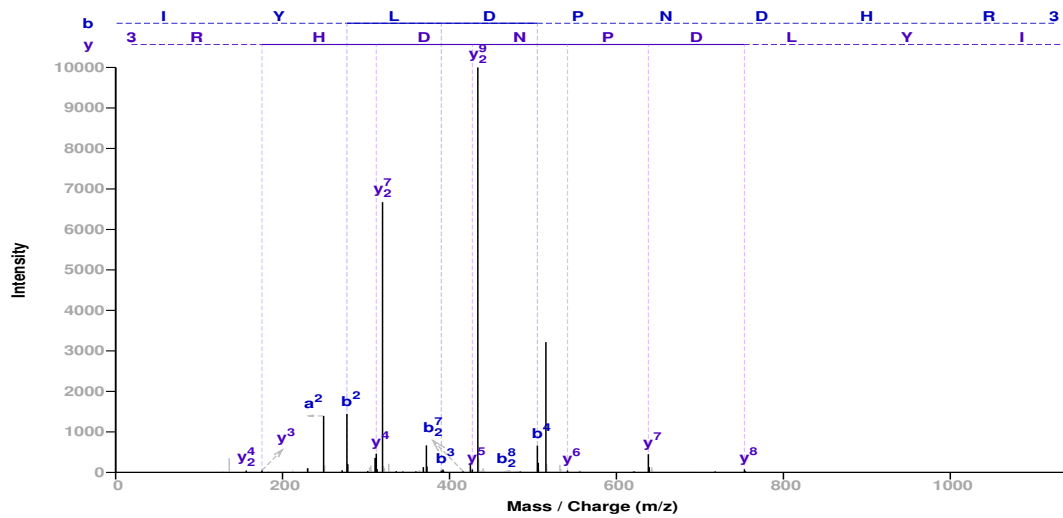

yeast0\_Scan\_Number\_5098 Precursor m/z: 432.737 cosine: 0.879  $\alpha$ : 0.478

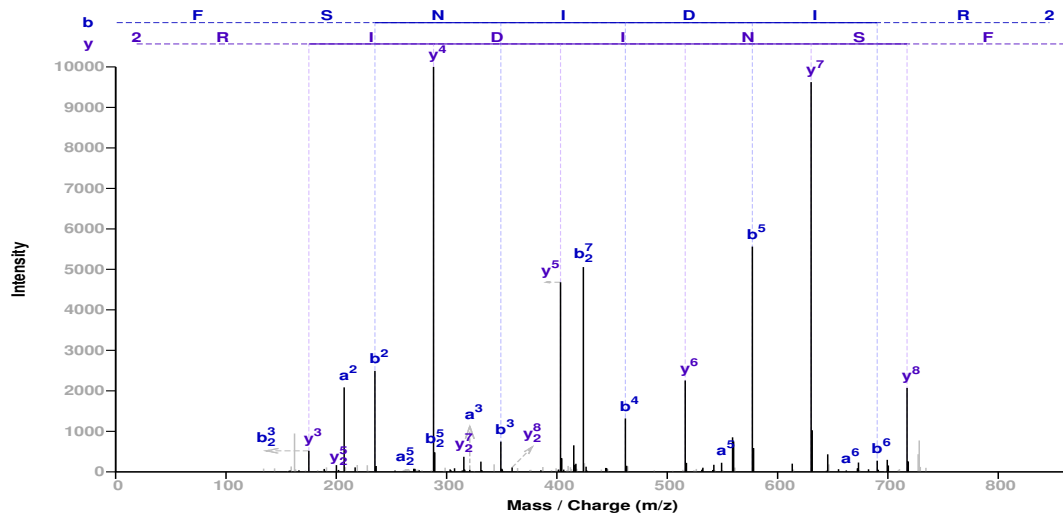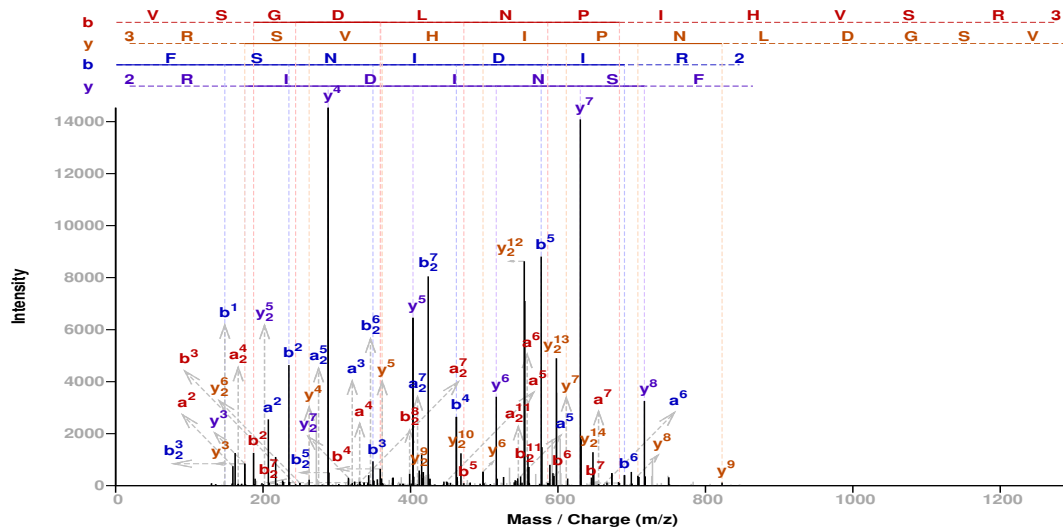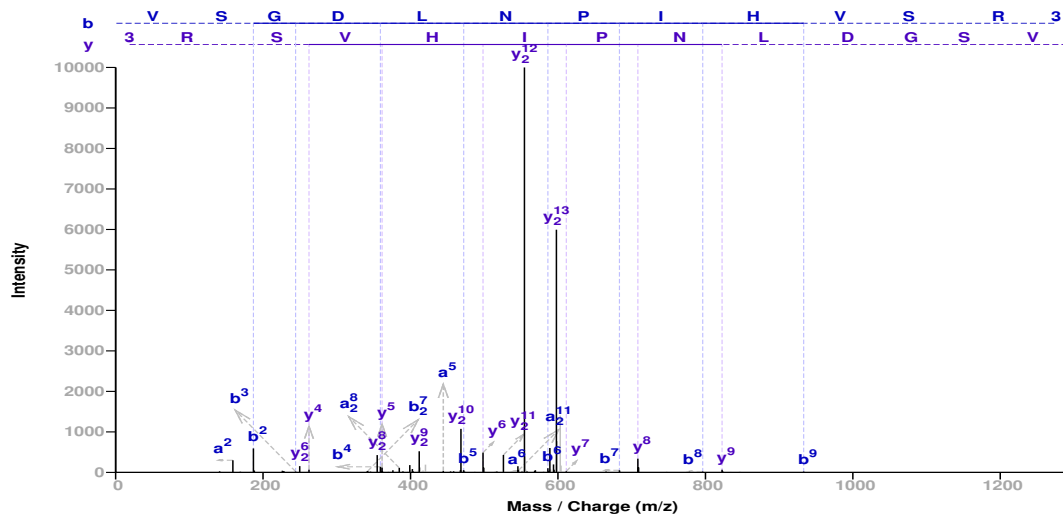



yeast0.Scan\_Number.10929 Precursor m/z: 670.043 cosine: 0.757  $\alpha$ : 0.467

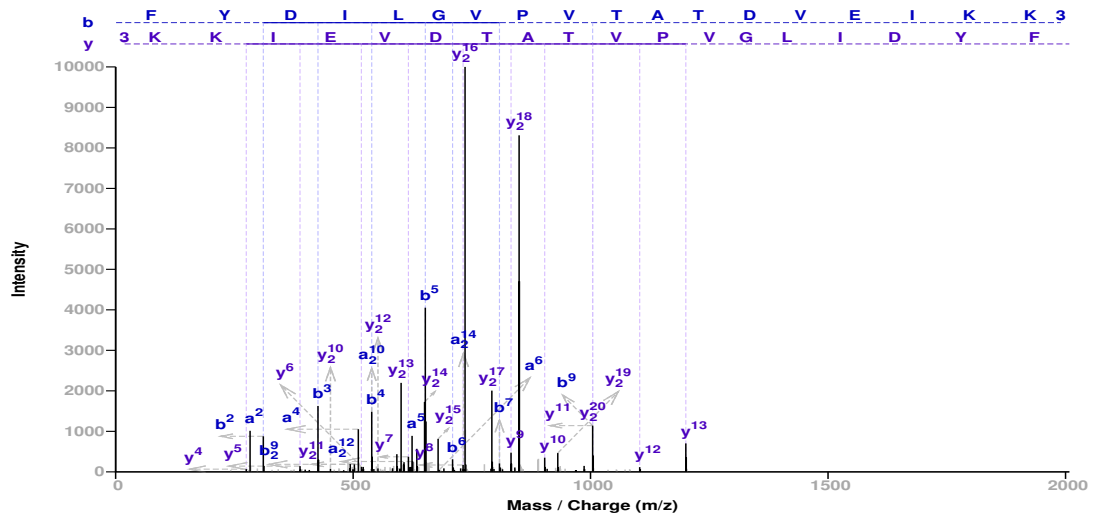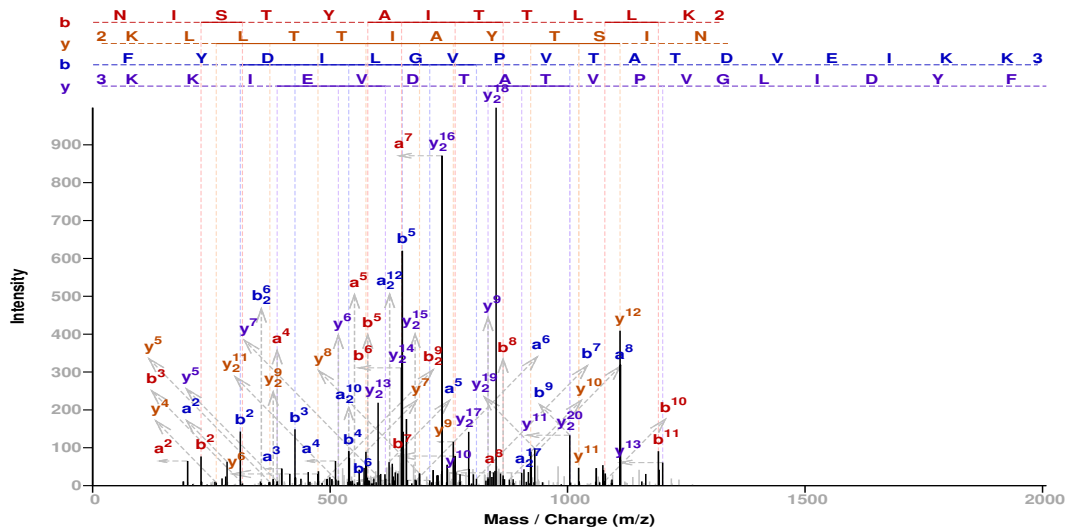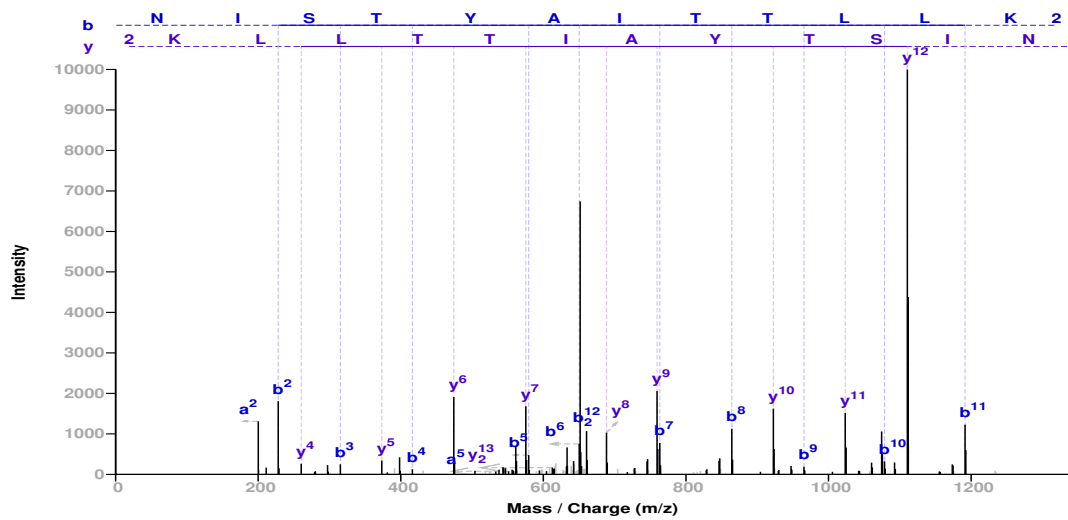



yeast0\_Scan\_Number\_5727 Precursor m/z: 446.239 cosine: 0.771  $\alpha$ : 0.460

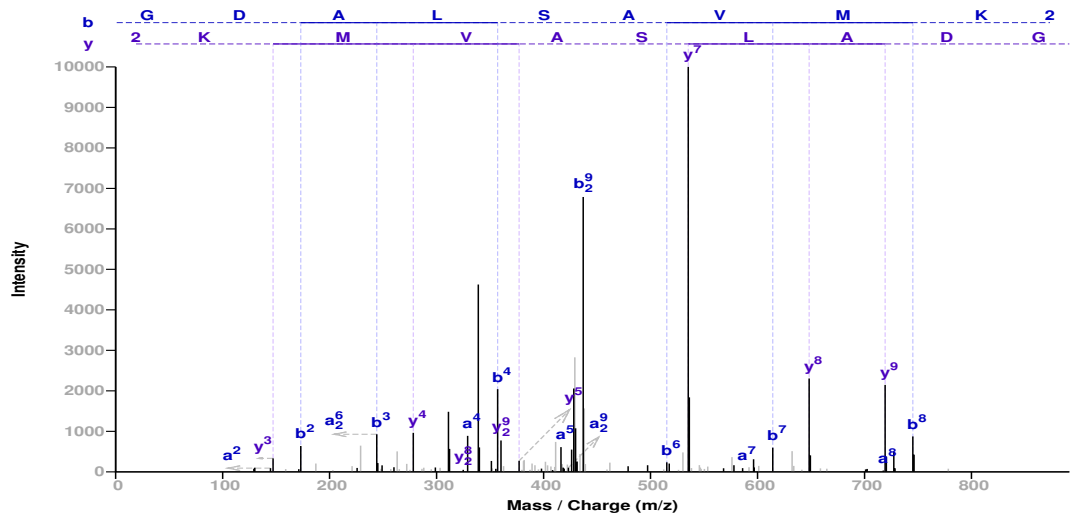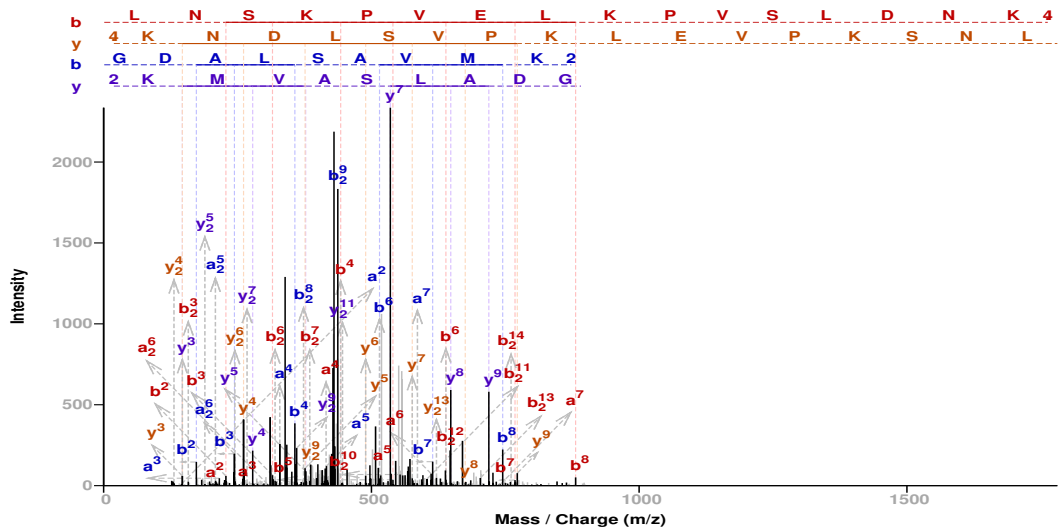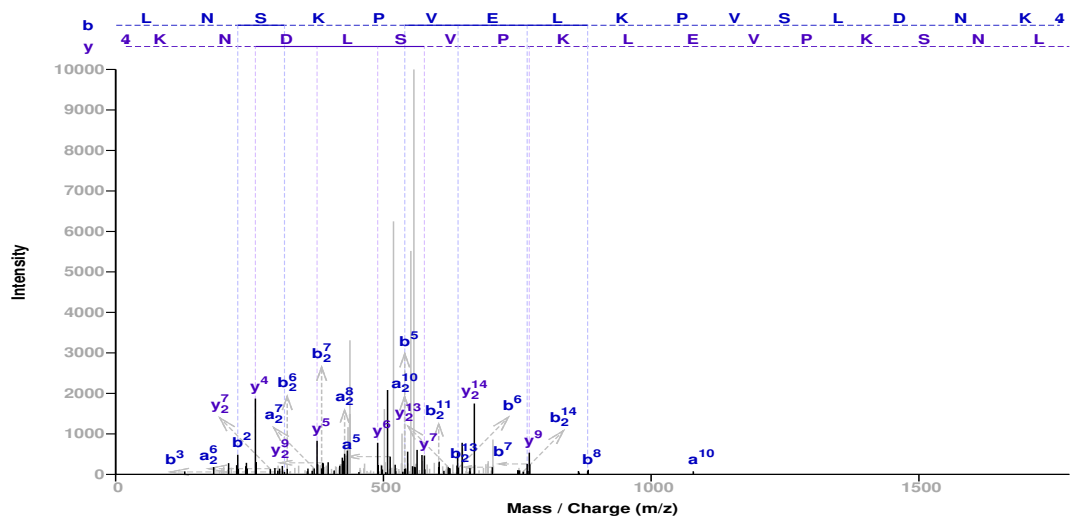

yeast0.Scan\_Number\_4302 Precursor m/z: 424.752 cosine: 0.944  $\alpha$ : 0.458

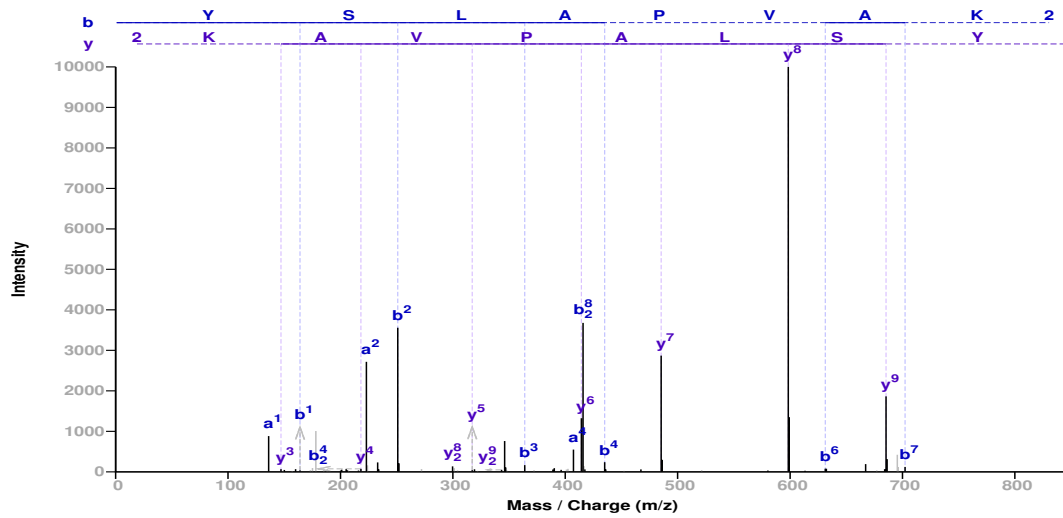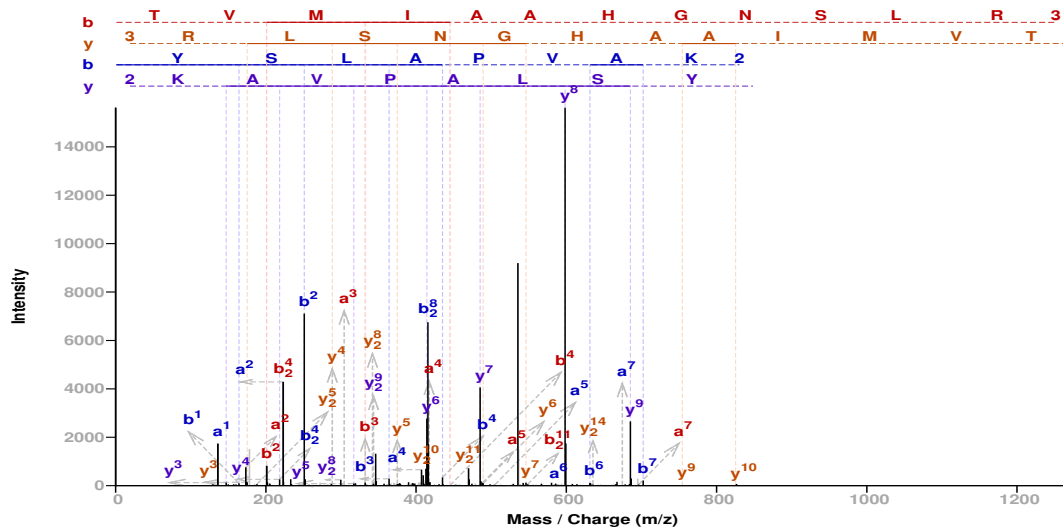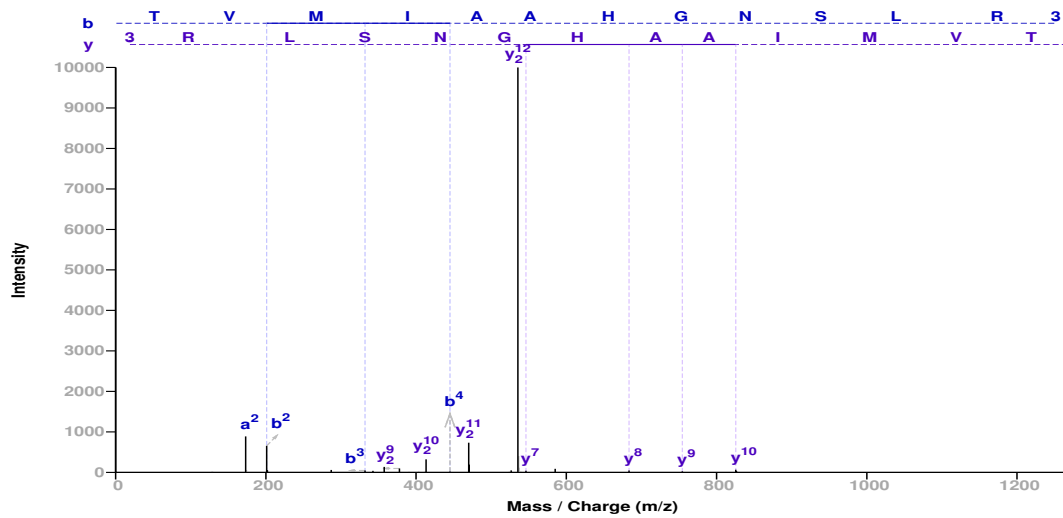

yeast0\_Scan\_Number\_8624 Precursor m/z: 559.800 cosine: 0.745  $\alpha$ : 0.458

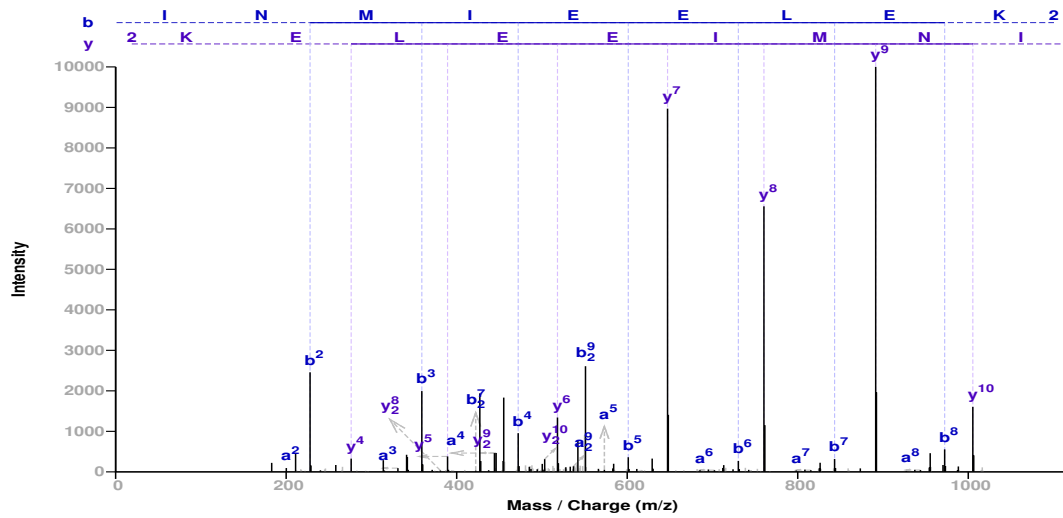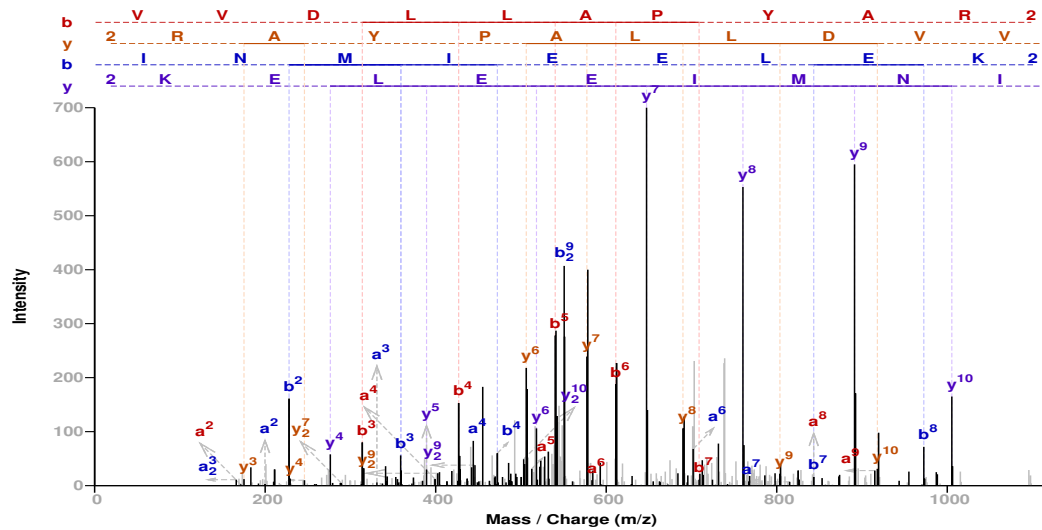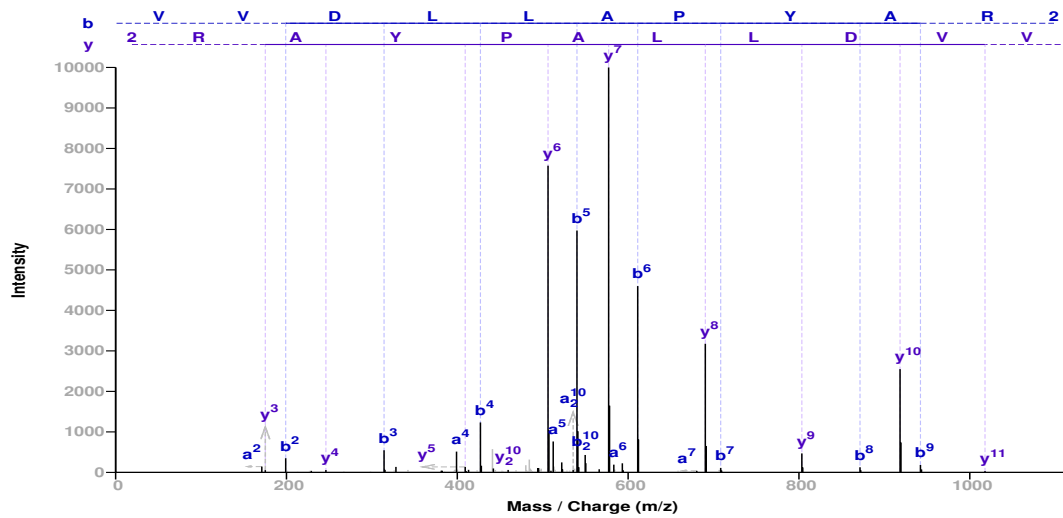

yeast0.Scan\_Number\_2078 Precursor m/z: 411.235 cosine: 0.819  $\alpha$ : 0.457

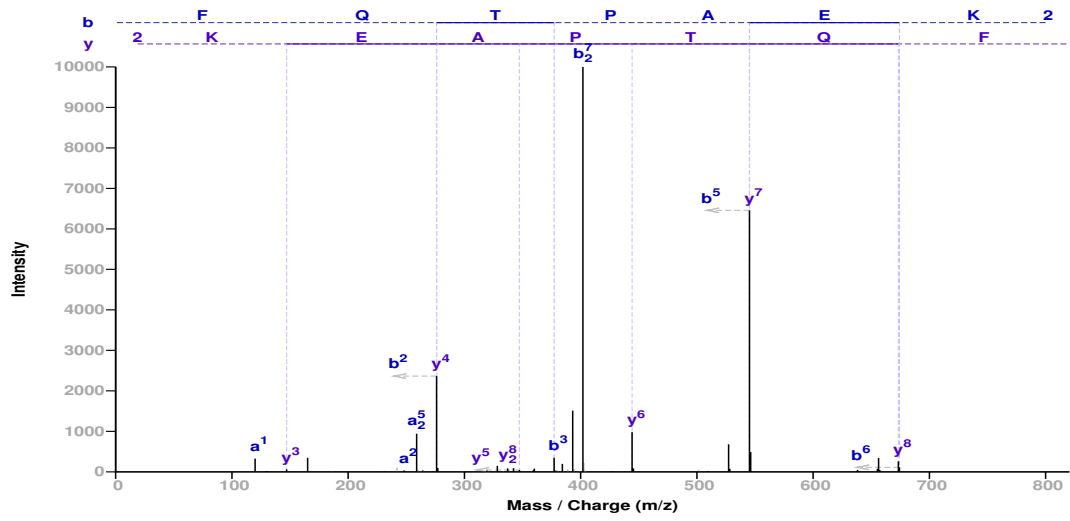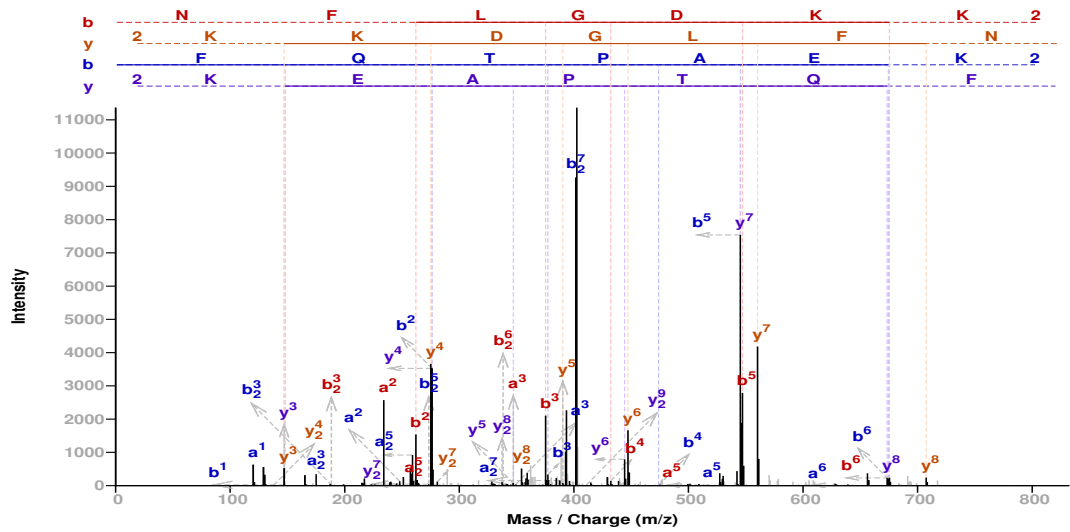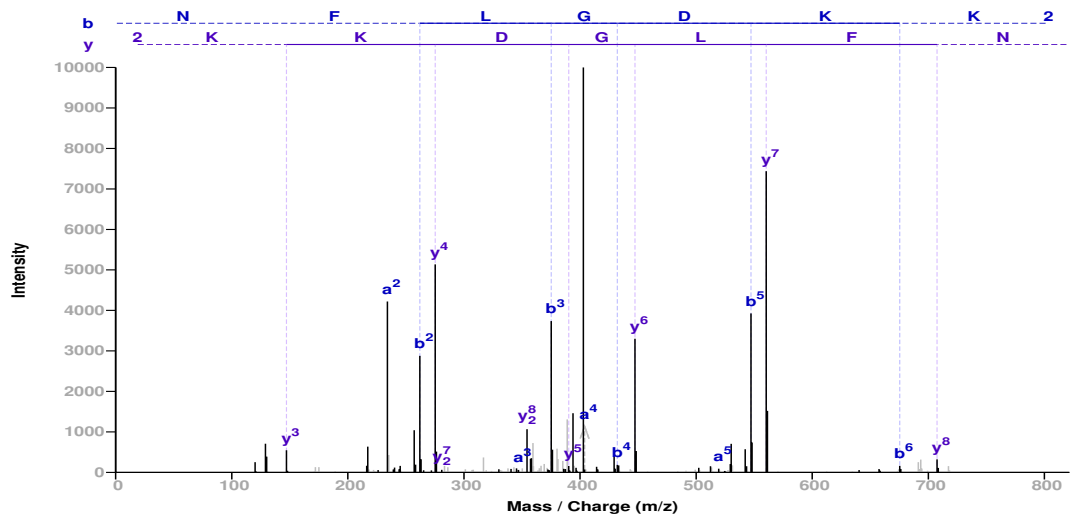

yeast0\_Scan\_Number\_4901 Precursor m/z: 393.733 cosine: 0.853  $\alpha$ : 0.456

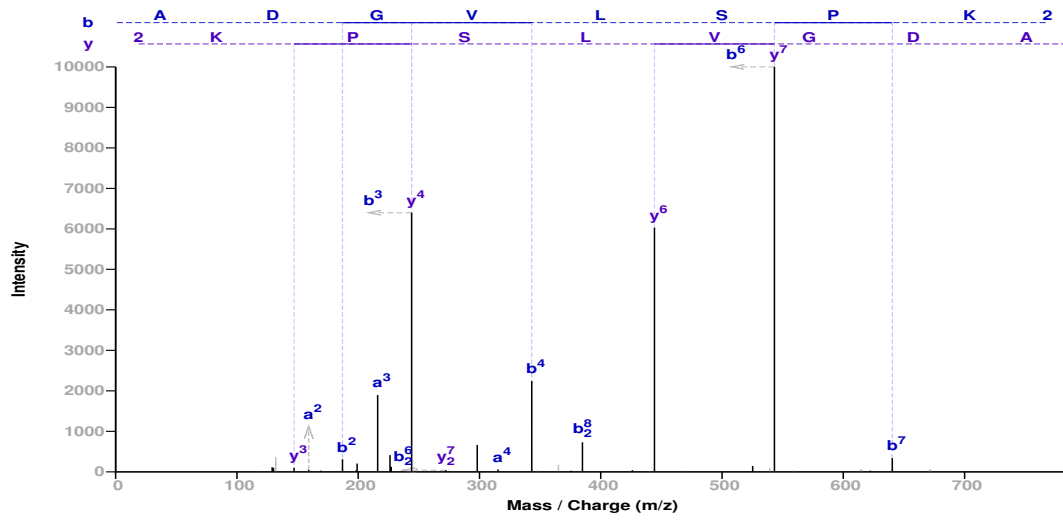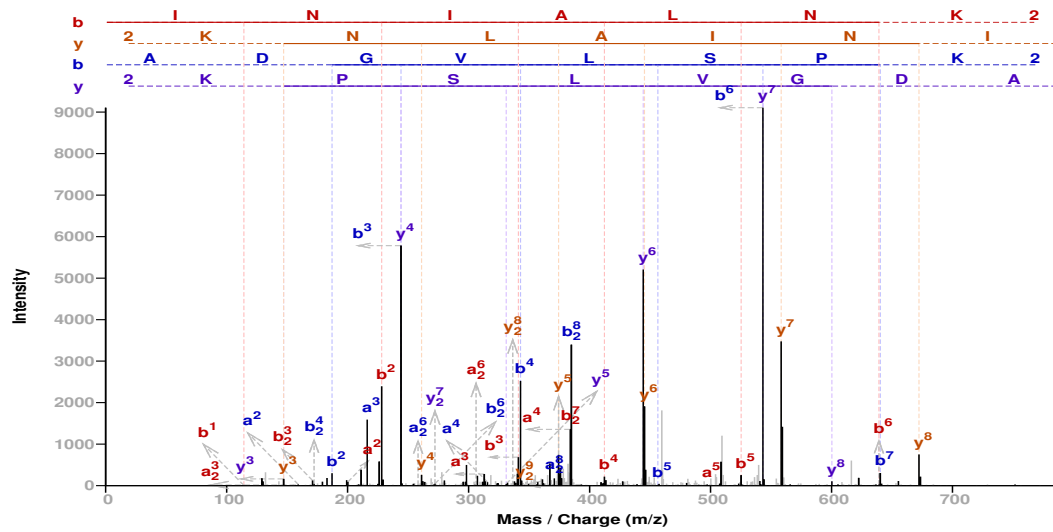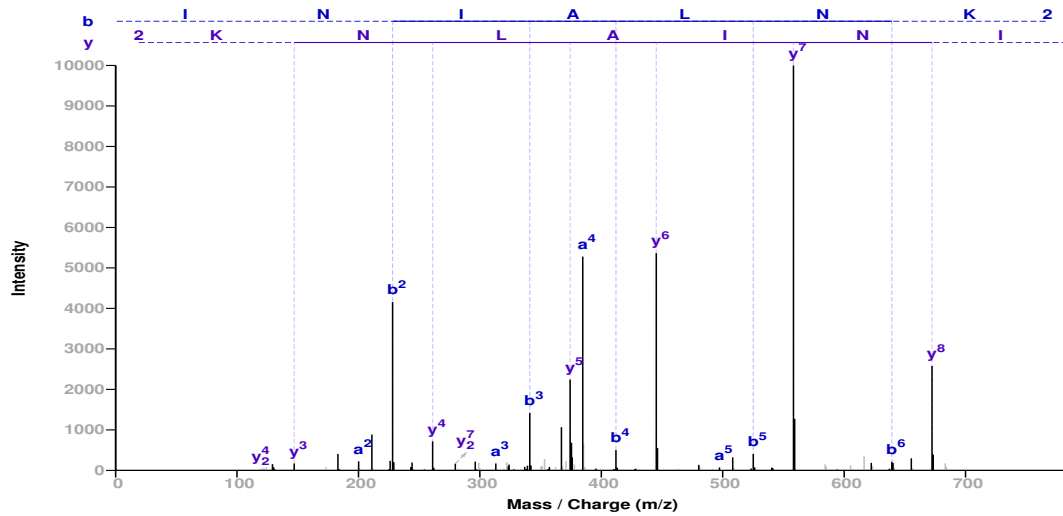

yeast0.Scan\_Number.1902 Precursor m/z: 433.709 cosine: 0.817  $\alpha$ : 0.453

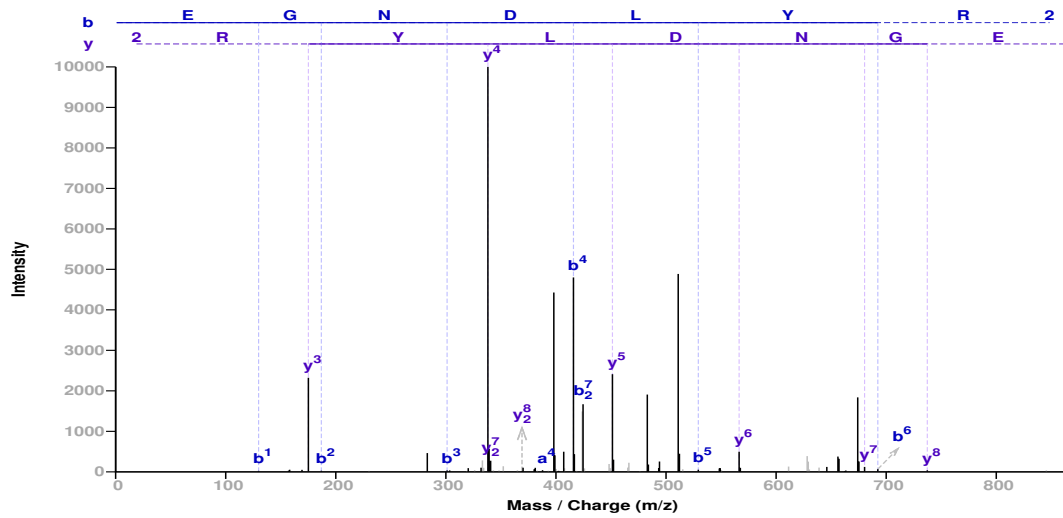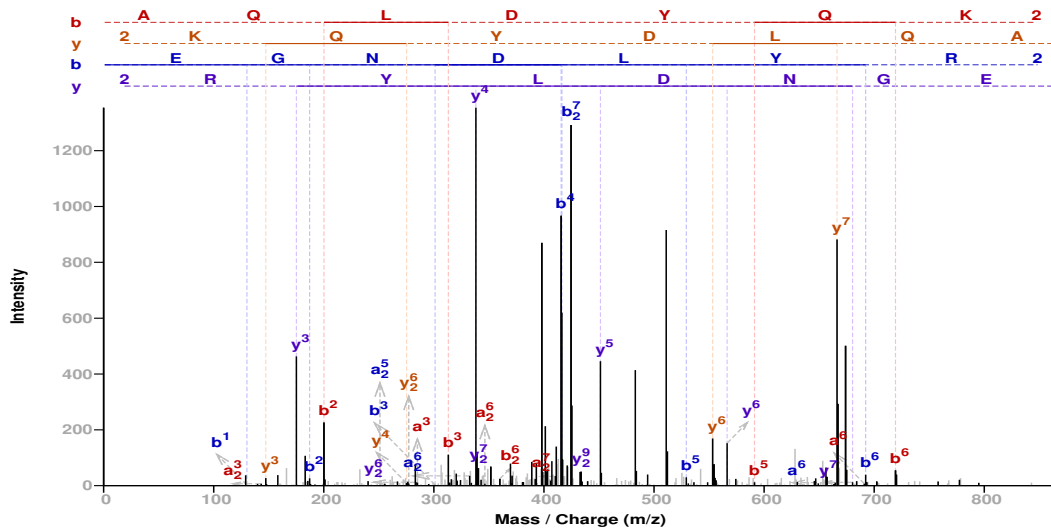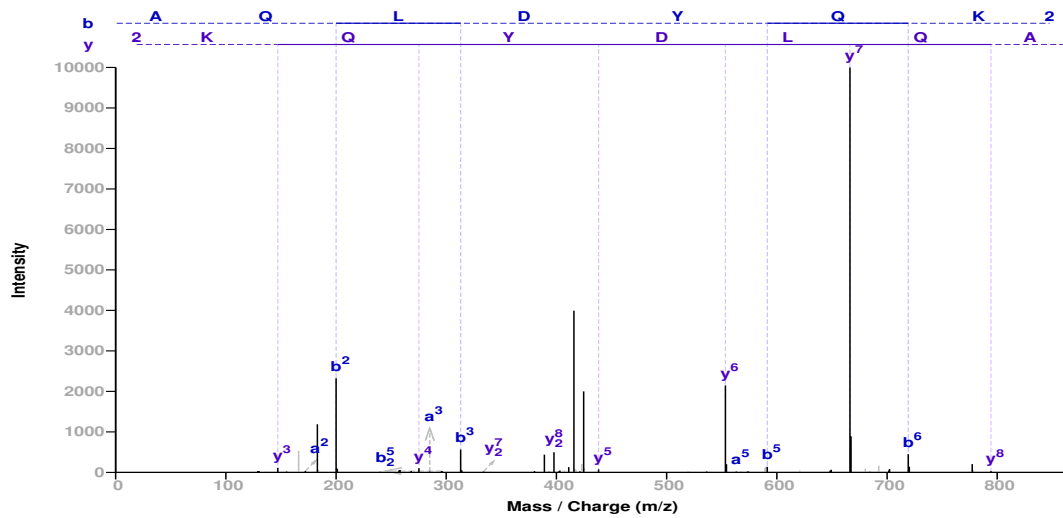

yeast0.Scan\_Number\_2386 Precursor m/z: 405.202 cosine: 0.734  $\alpha$ : 0.444

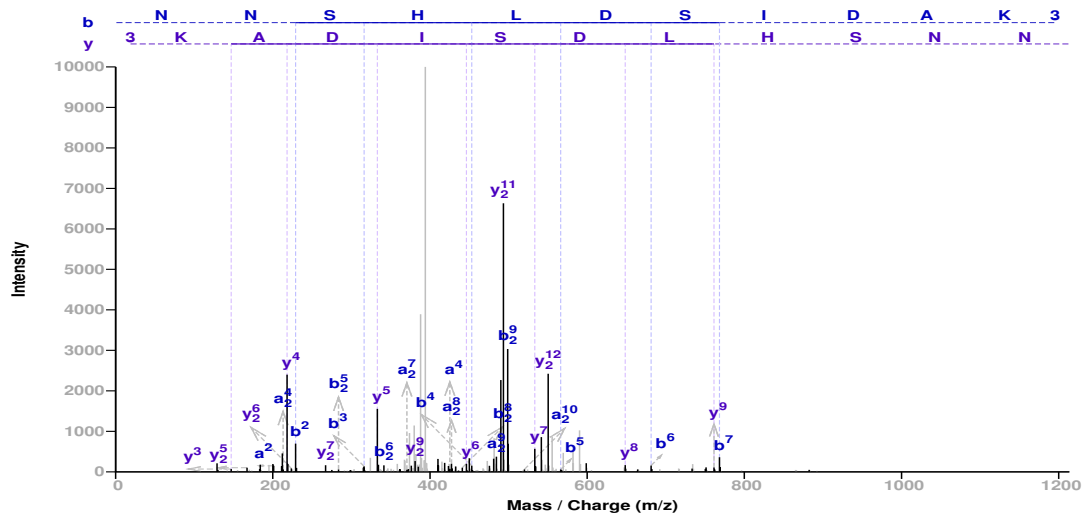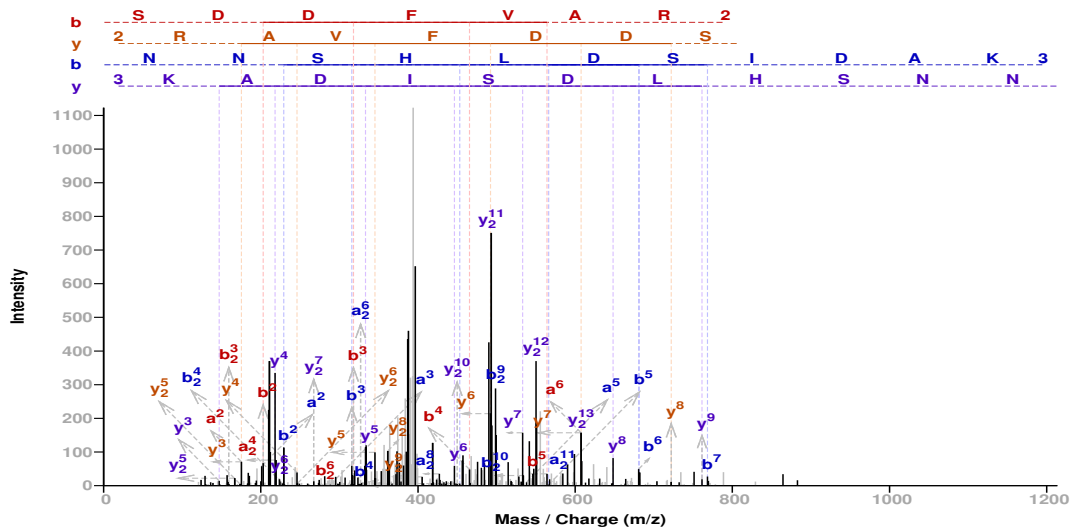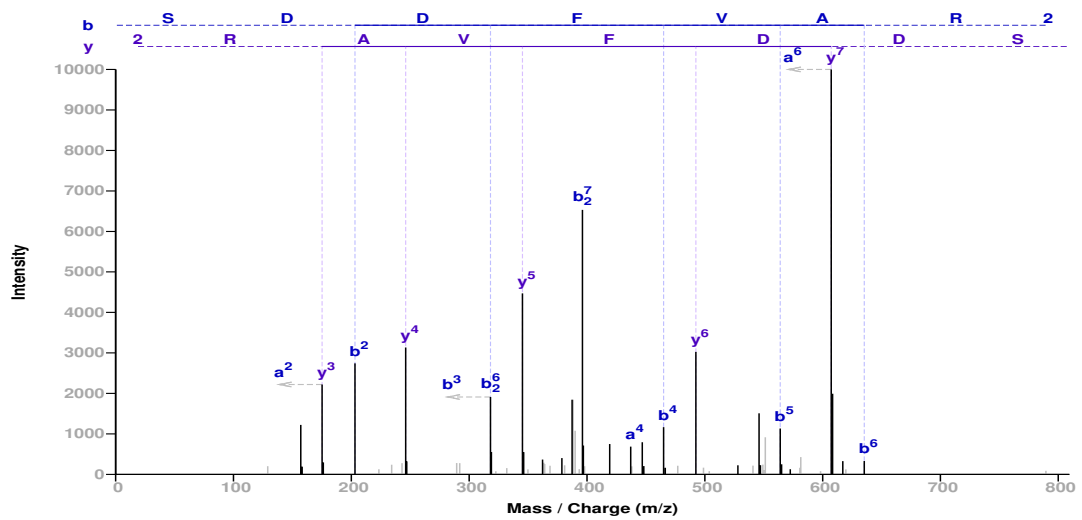

yeast0\_Scan\_Number\_7583 Precursor m/z: 646.829 cosine: 0.781  $\alpha$ : 0.439

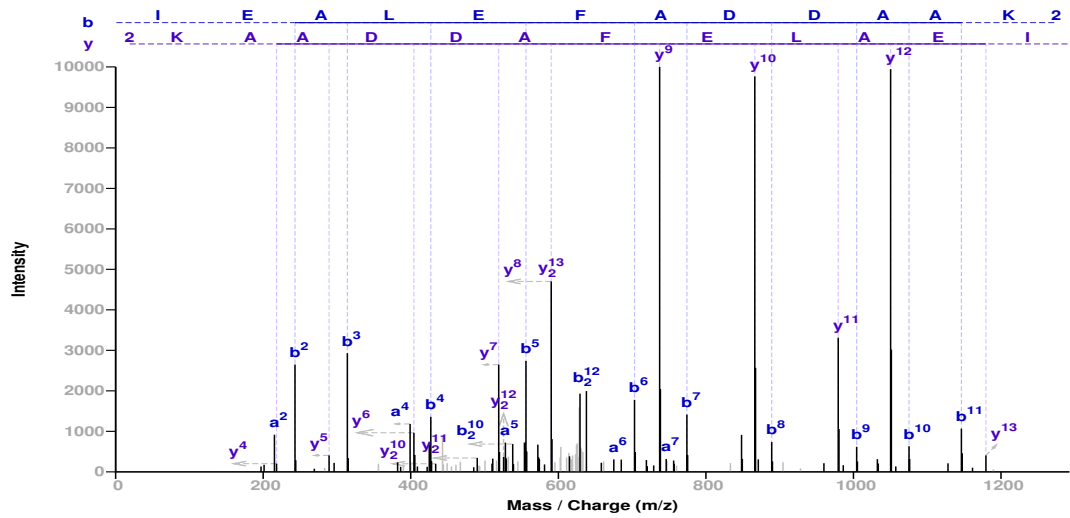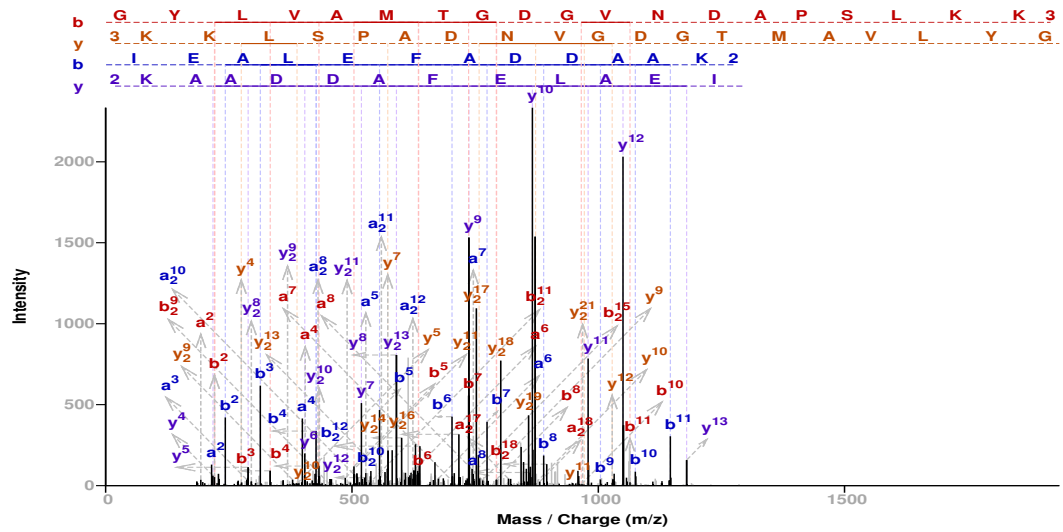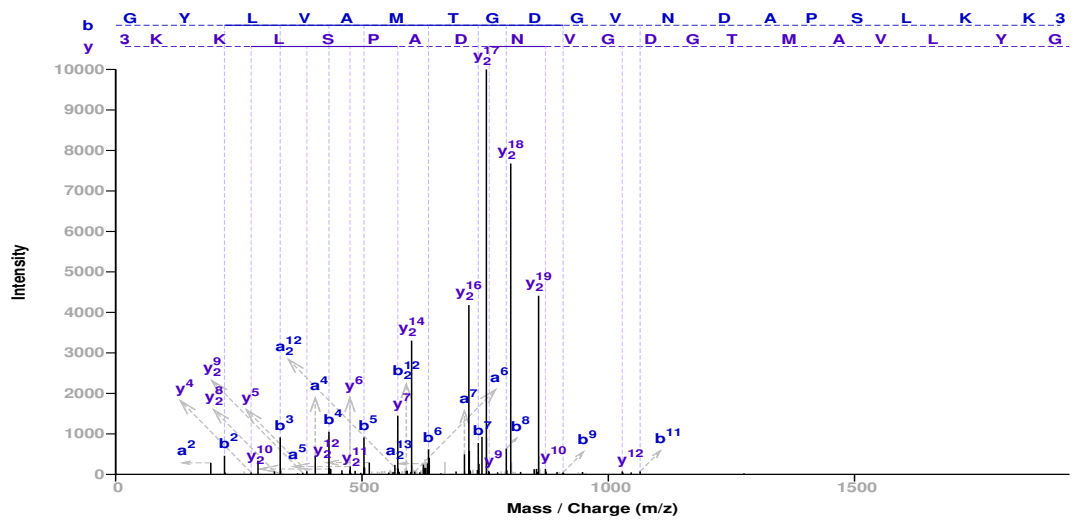



yeast0\_Scan\_Number\_5474 Precursor m/z: 716.906 cosine: 0.828  $\alpha$ : 0.438

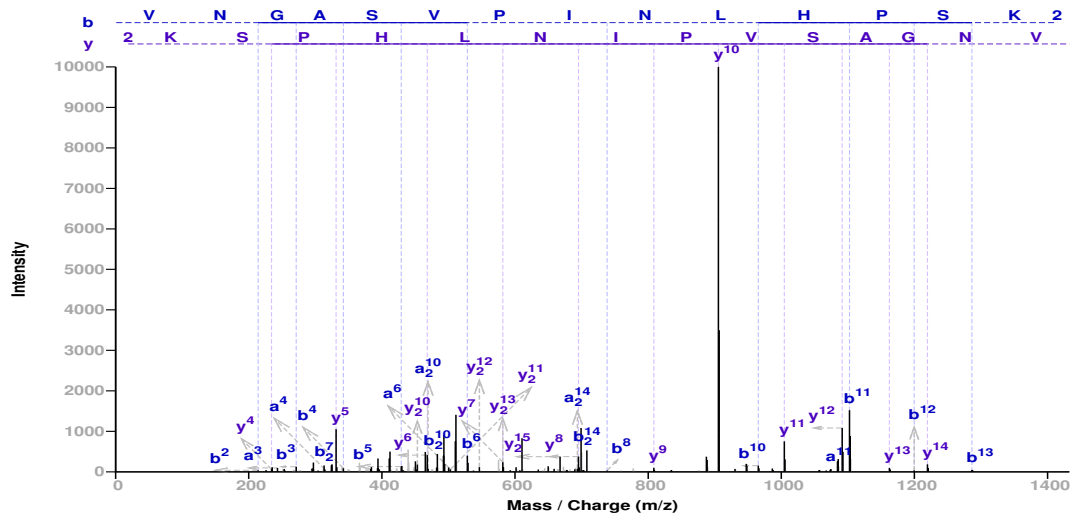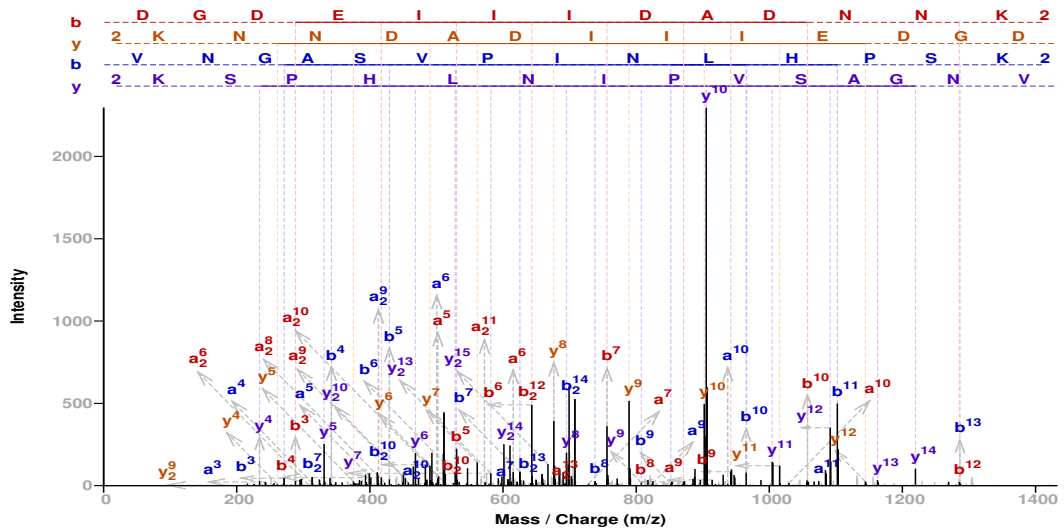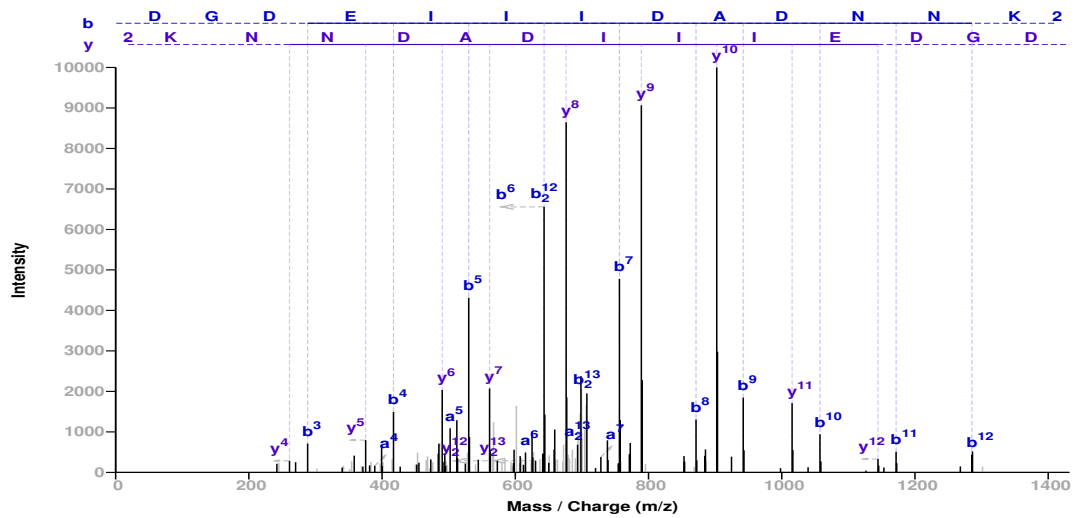

yeast0.Scan\_Number.2617 Precursor m/z: 694.365 cosine: 0.731  $\alpha$ : 0.435

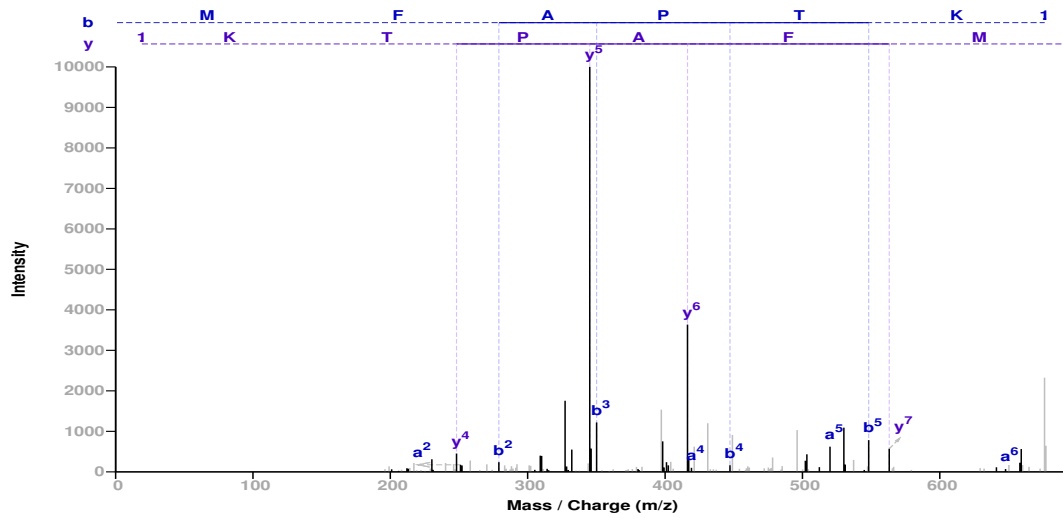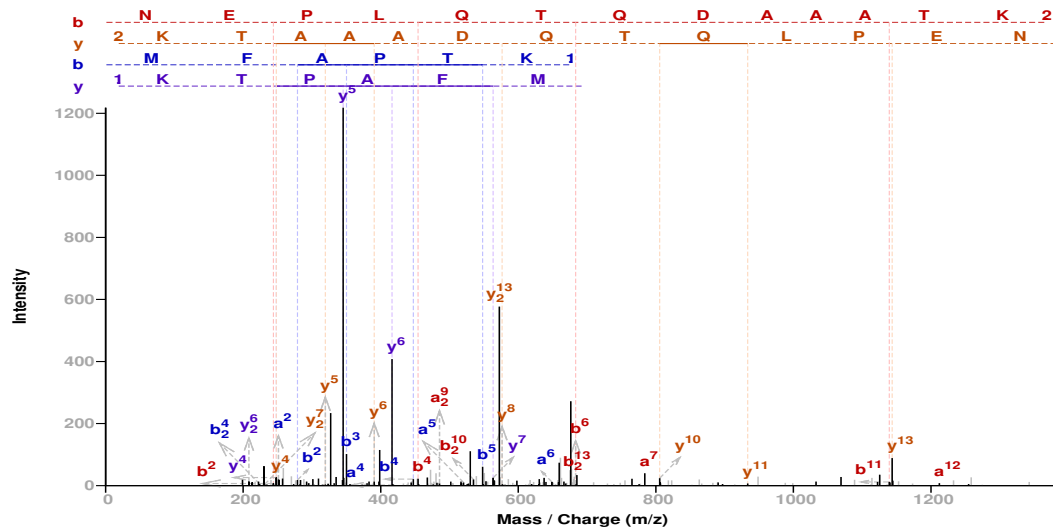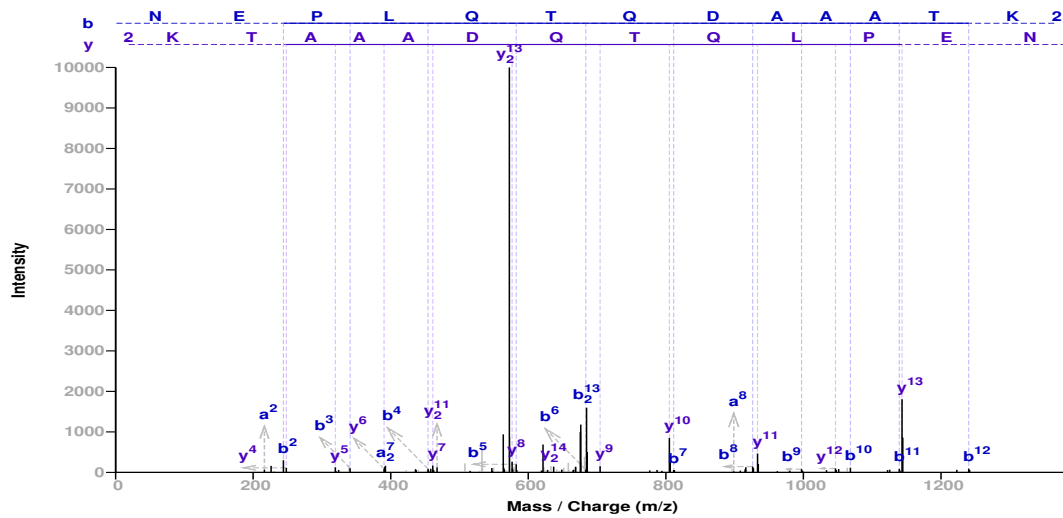

yeast0.Scan\_Number\_4201 Precursor m/z: 565.741 cosine: 0.790  $\alpha$ : 0.432

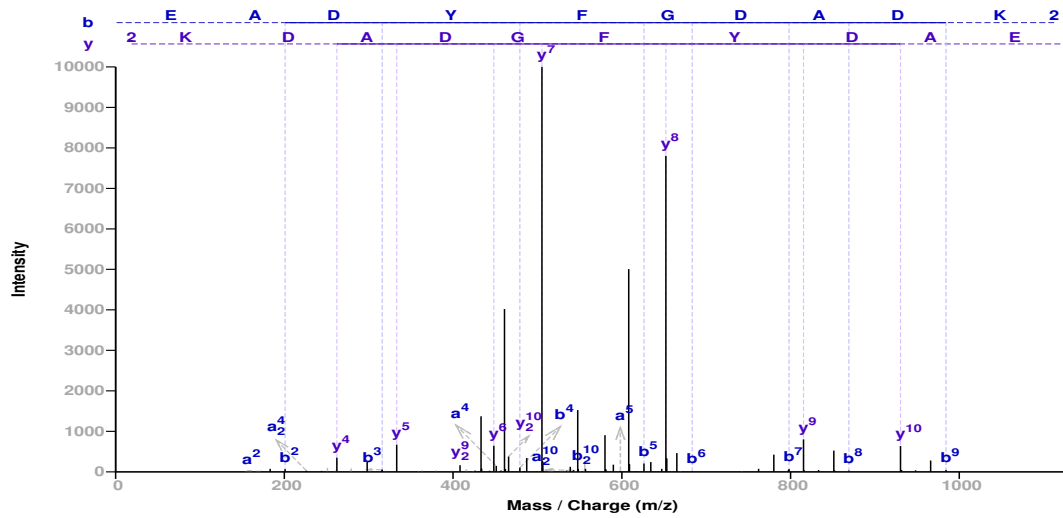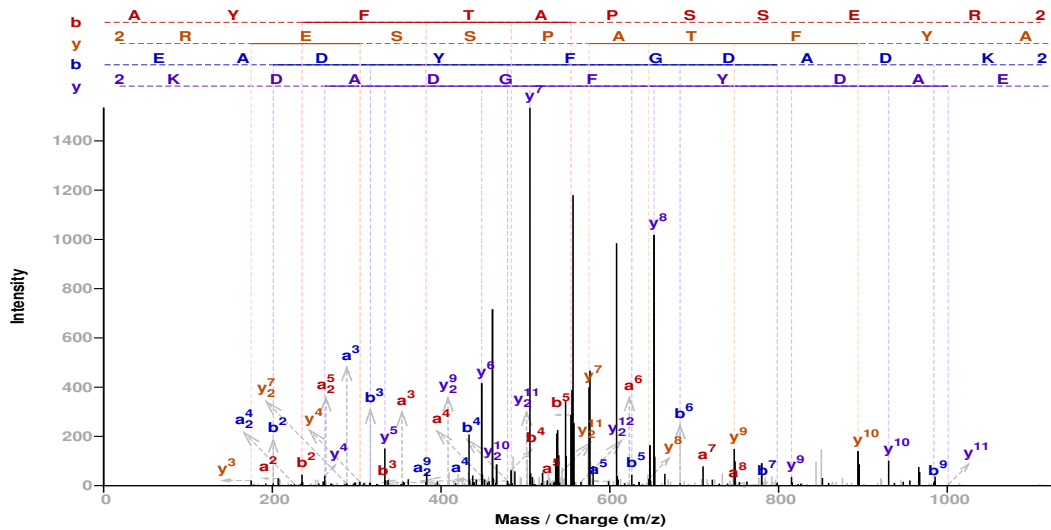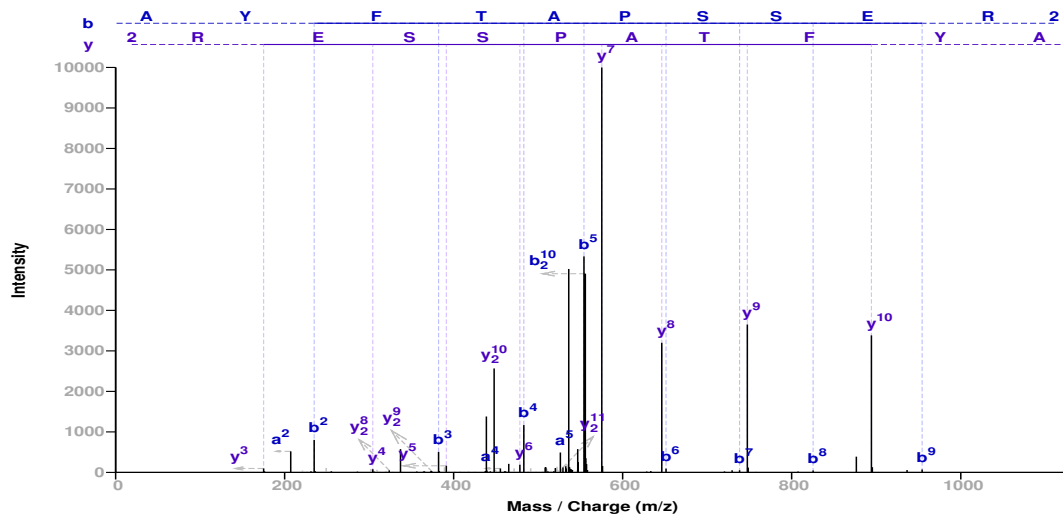

yeast0.Scan\_Number.1145 Precursor m/z: 402.737 cosine: 0.740  $\alpha$ : 0.427

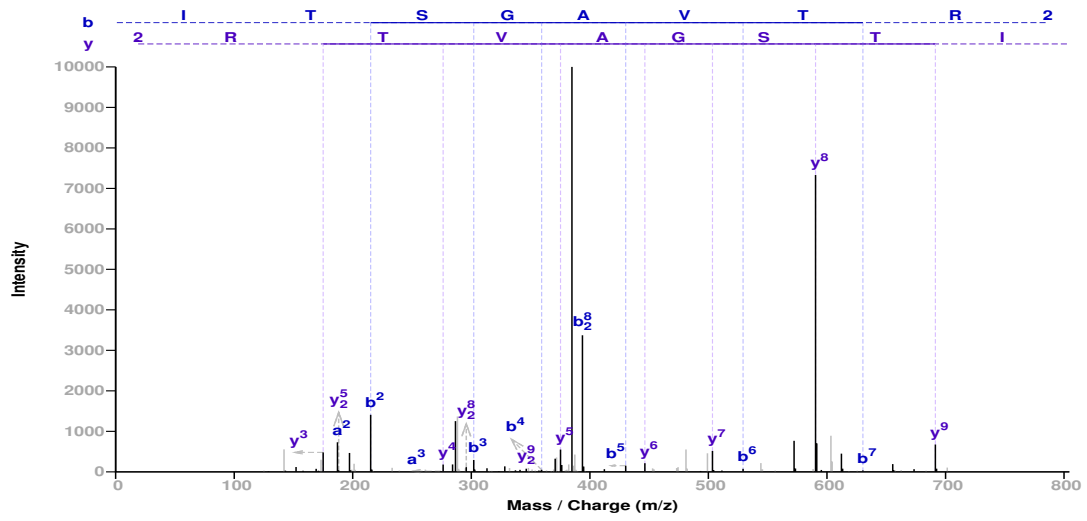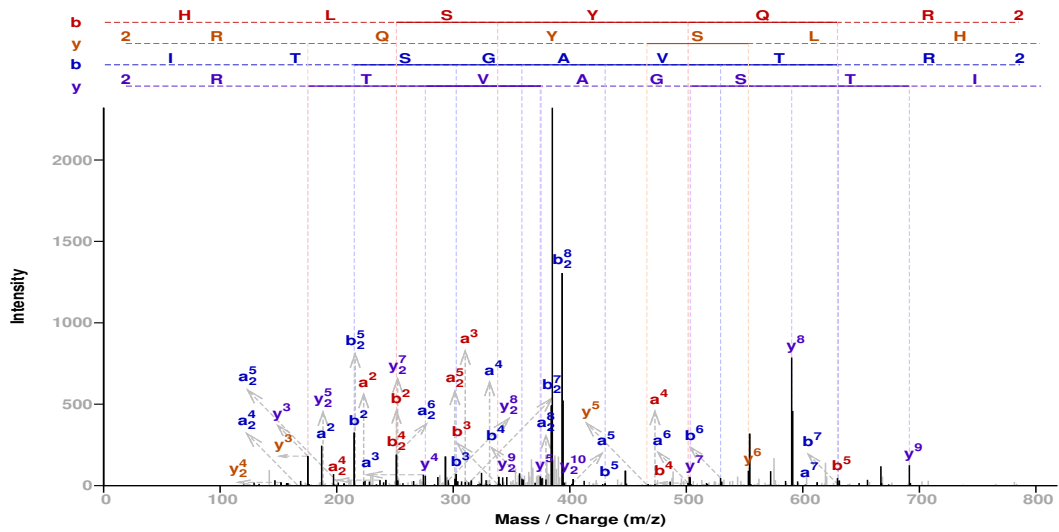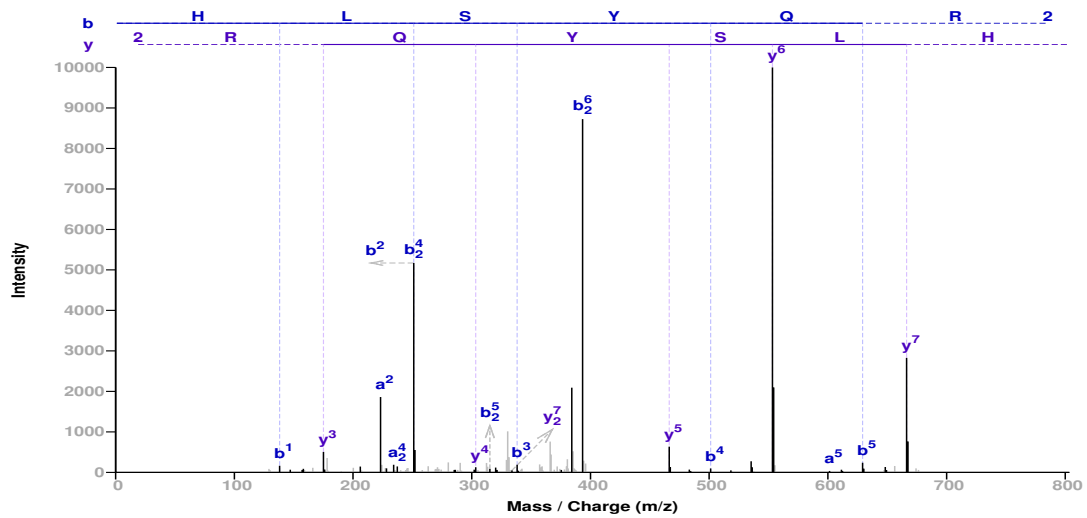

yeast0\_Scan\_Number\_6313 Precursor m/z: 709.852 cosine: 0.814  $\alpha$ : 0.425

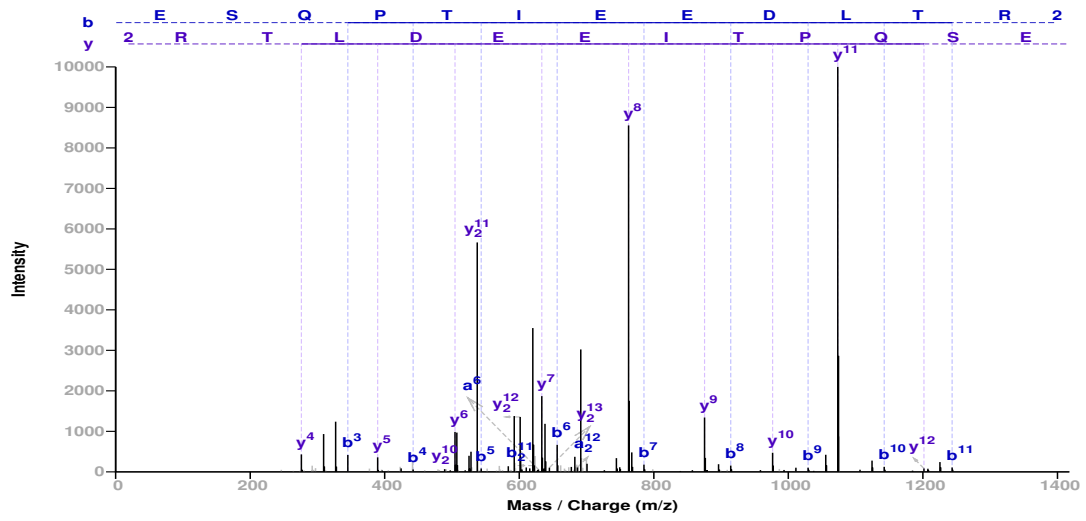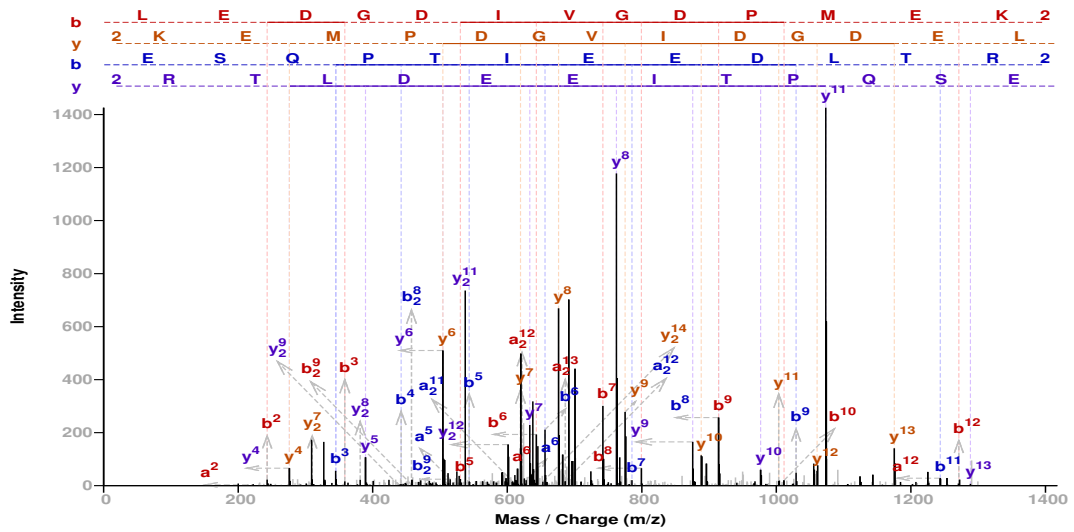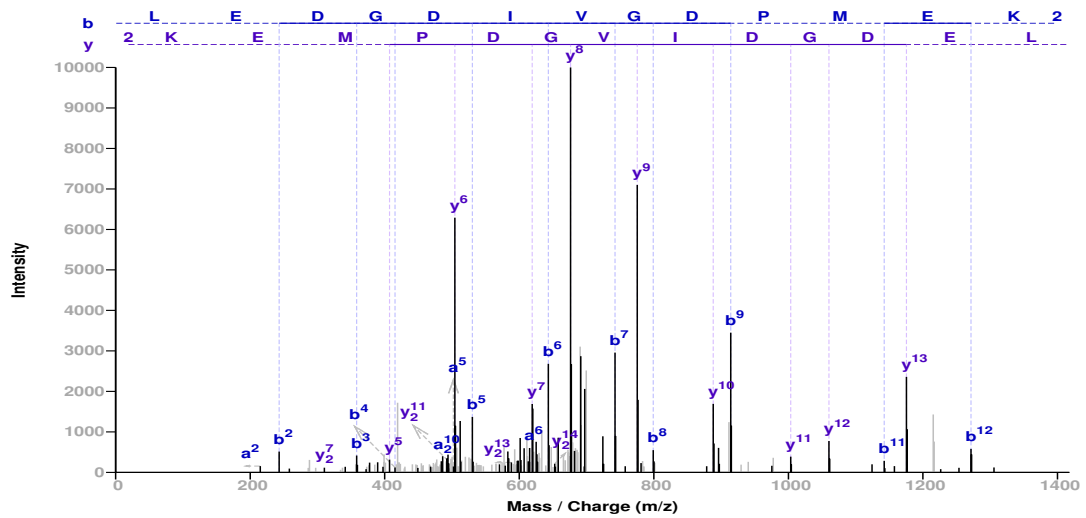



yeast0\_Scan\_Number\_4053 Precursor m/z: 642.807 cosine: 0.808  $\alpha$ : 0.406

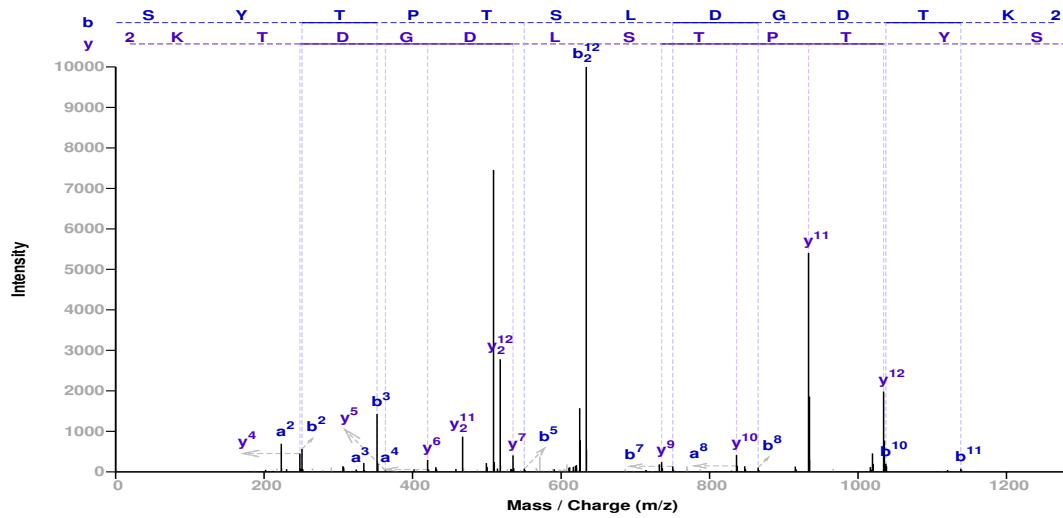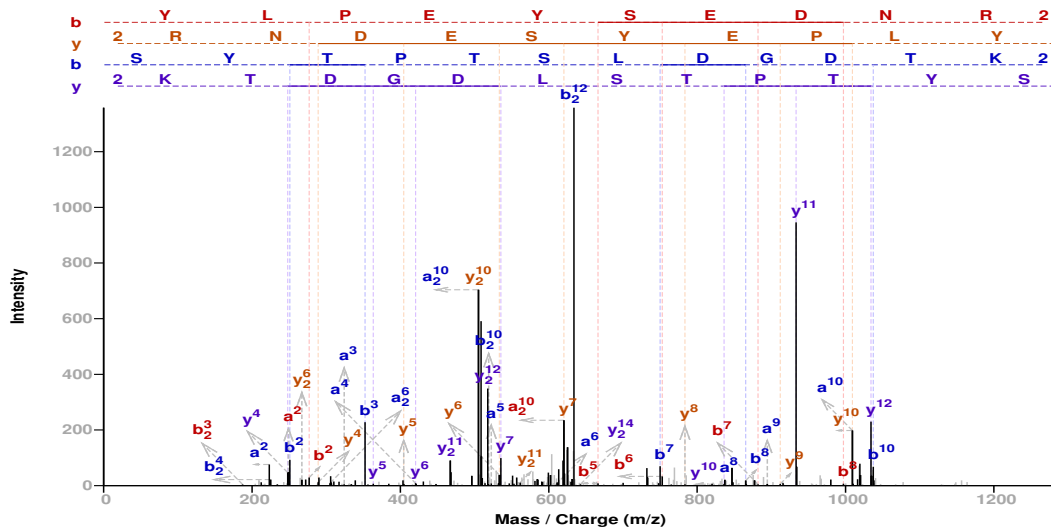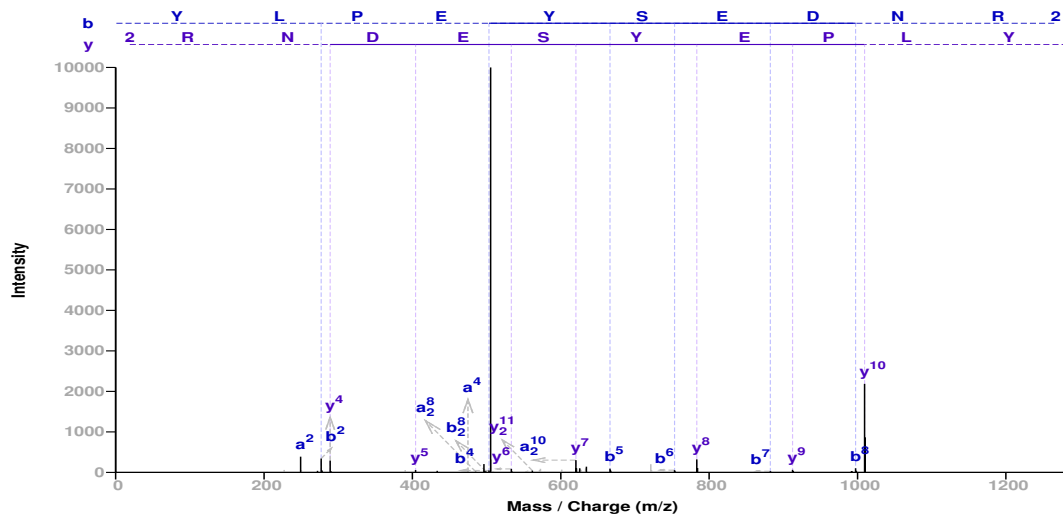

yeast0\_Scan\_Number\_10692 Precursor m/z: 788.930 cosine: 0.768  $\alpha$ : 0.405

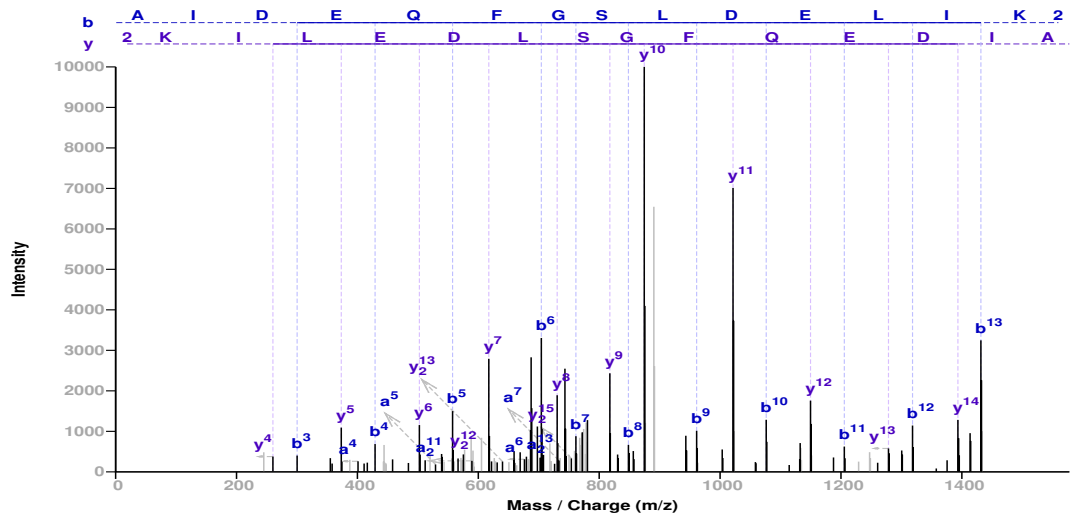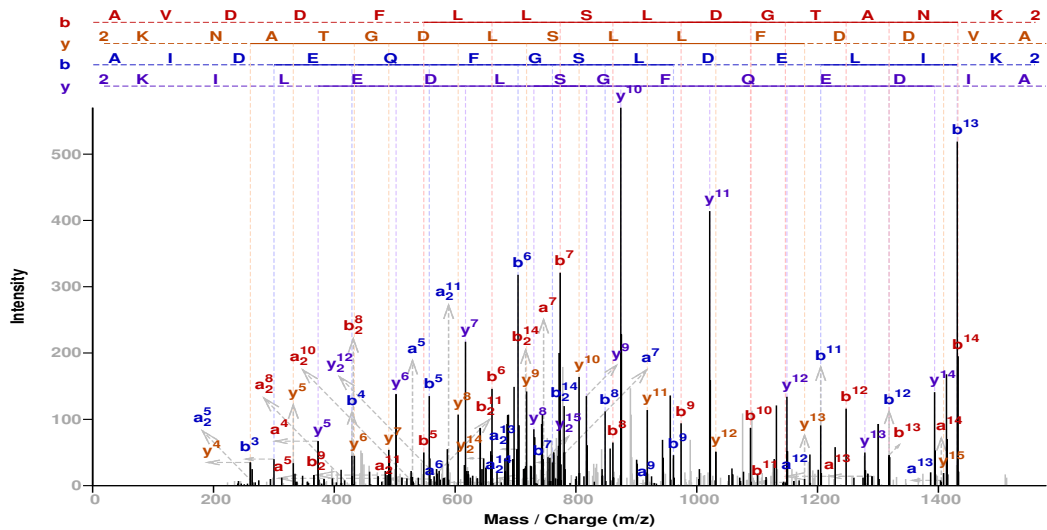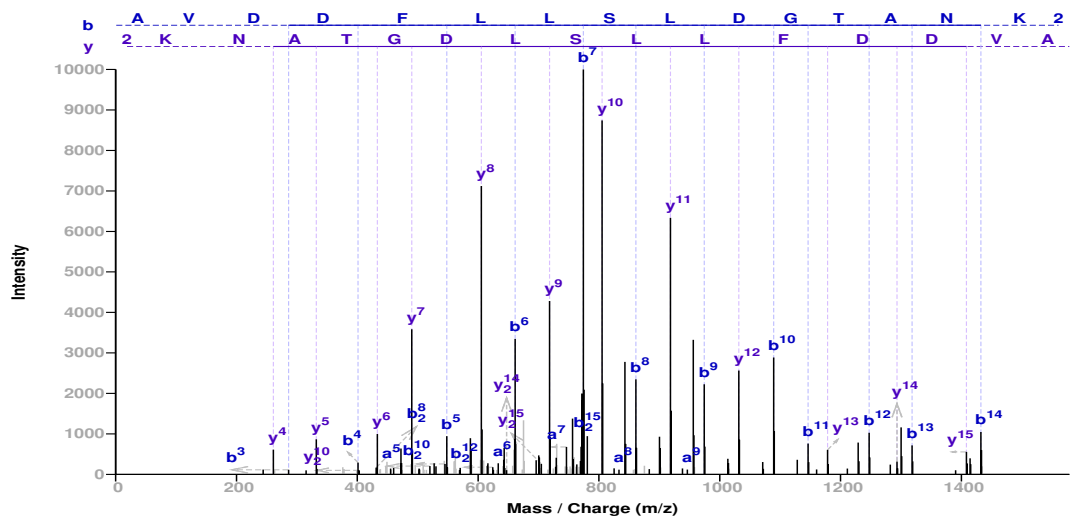



yeast0\_Scan\_Number\_5628 Precursor m/z: 651.840 cosine: 0.783  $\alpha$ : 0.405

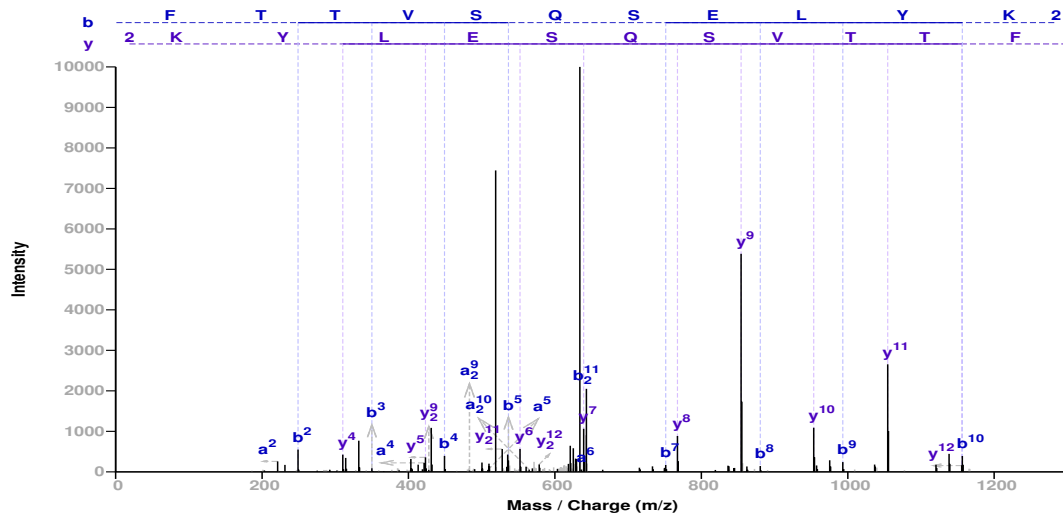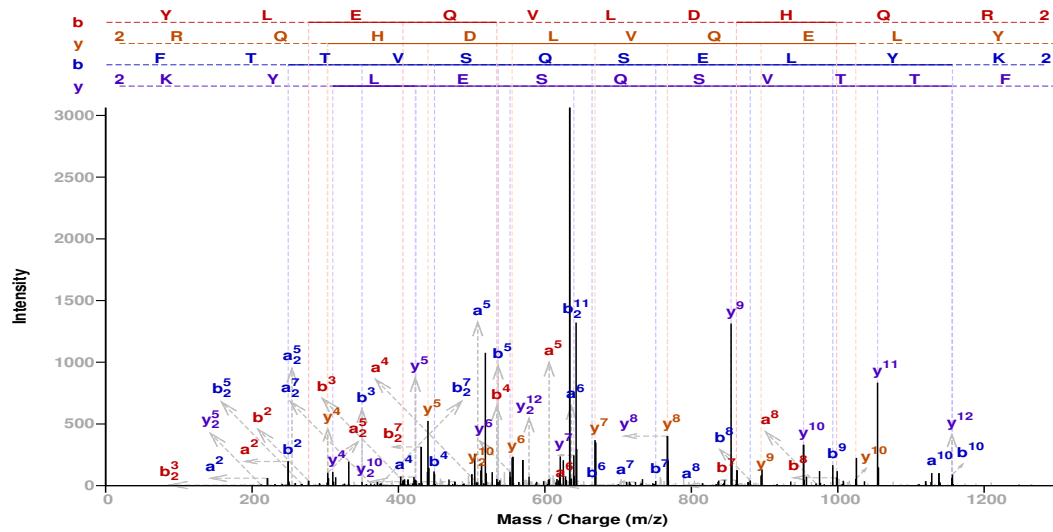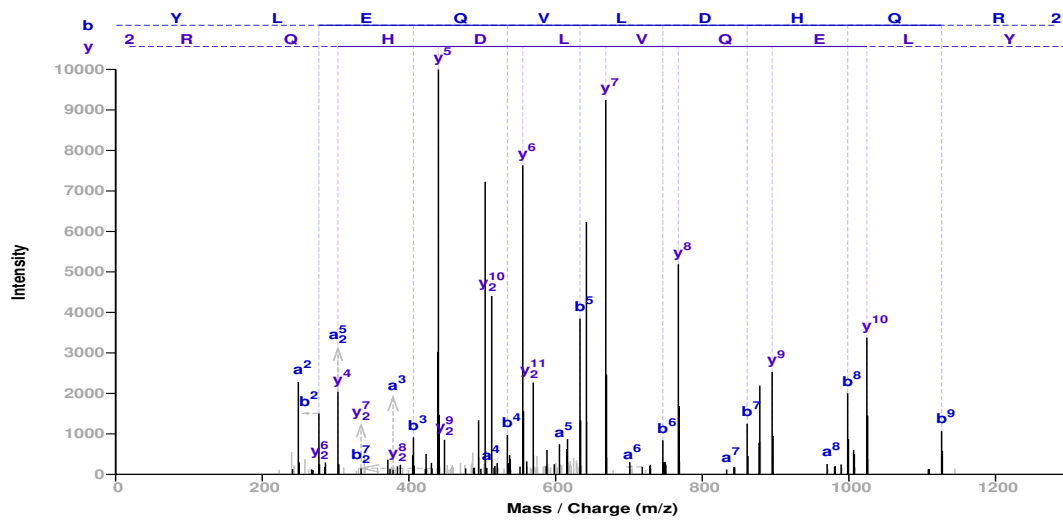

yeast0.Scan\_Number\_2164 Precursor m/z: 398.221 cosine: 0.733  $\alpha$ : 0.402

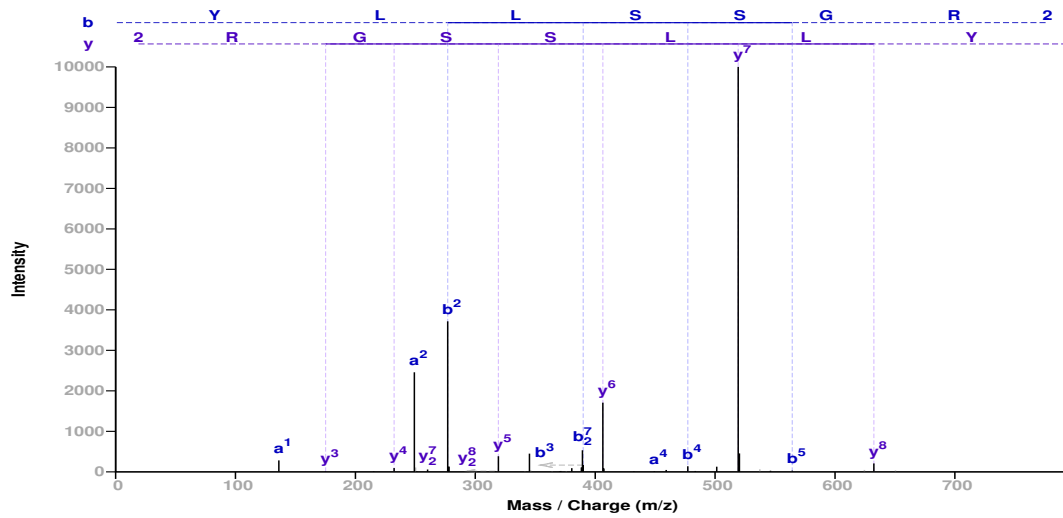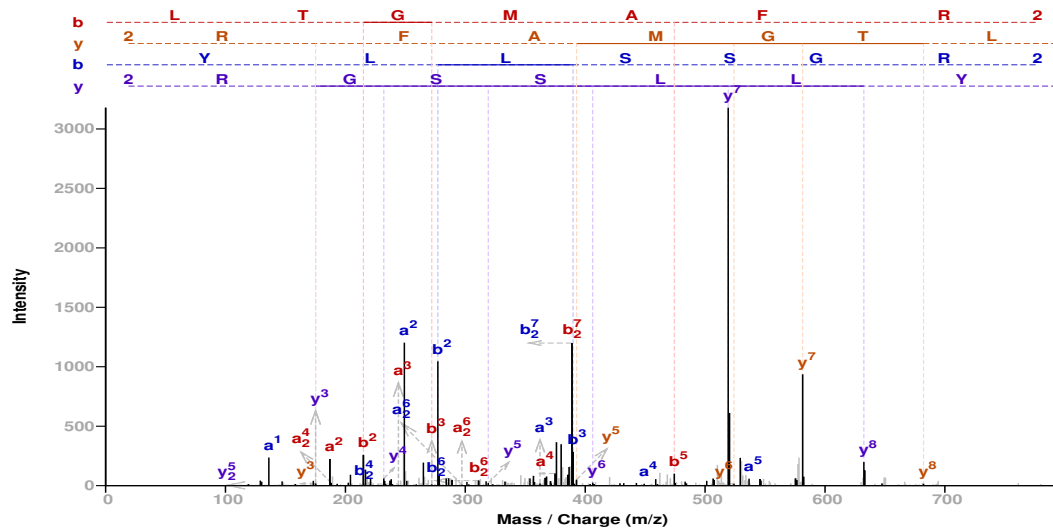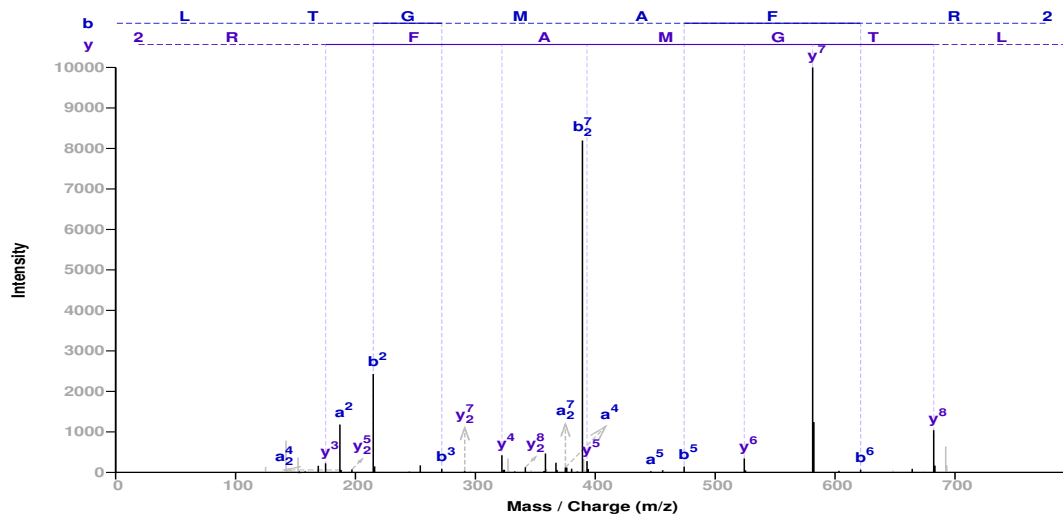

yeast0.Scan\_Number.2542 Precursor m/z: 497.913 cosine: 0.882  $\alpha$ : 0.400

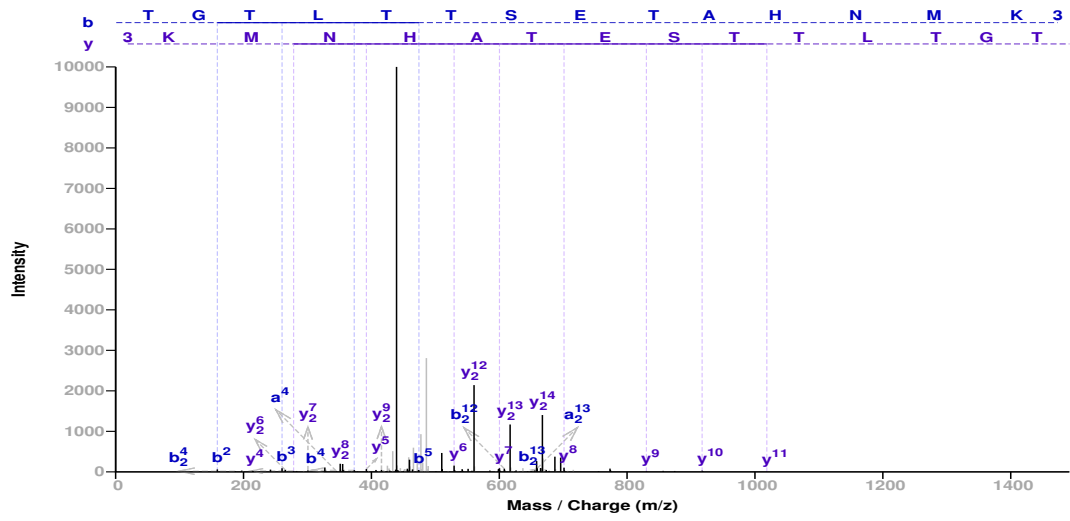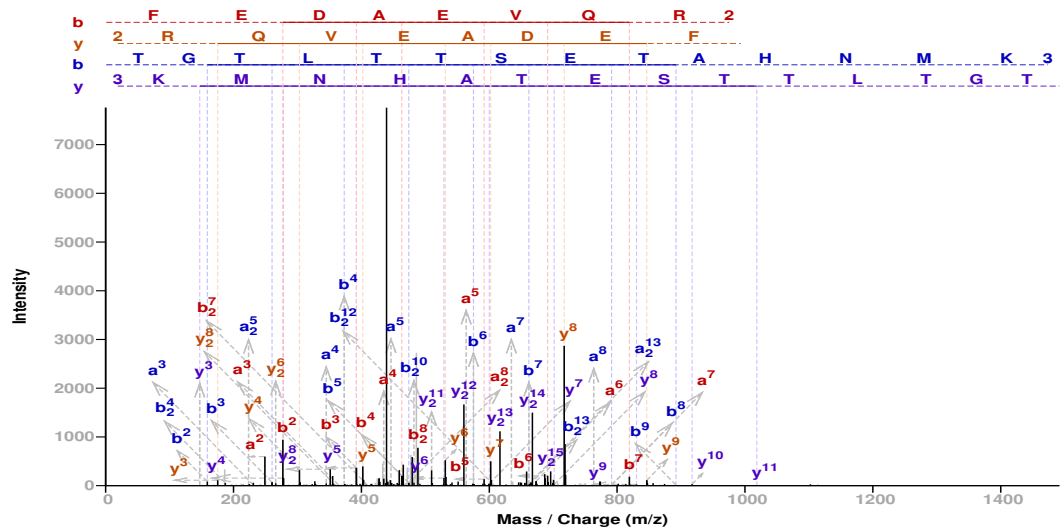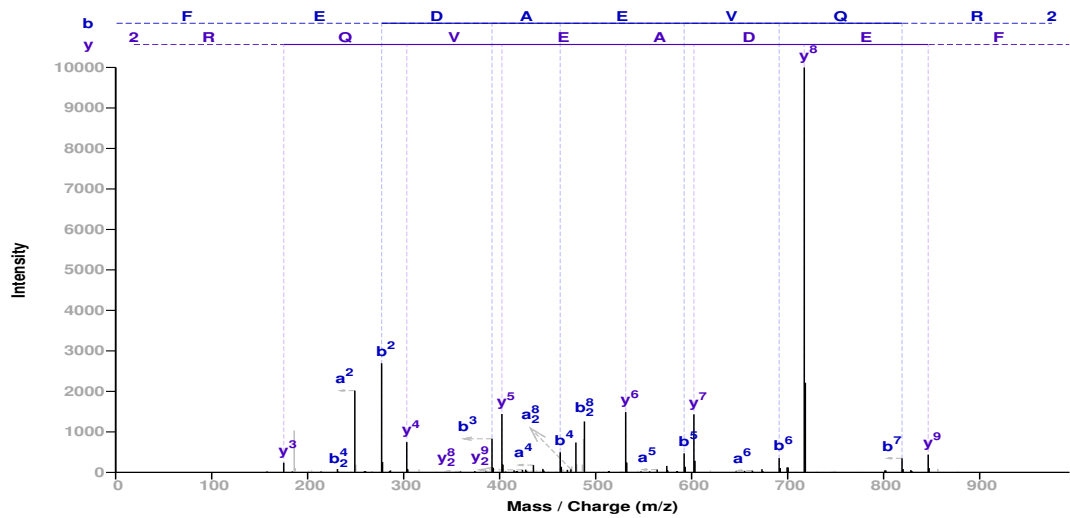

yeast0\_Scan\_Number\_5356 Precursor m/z: 365.561 cosine: 0.785  $\alpha$ : 0.397

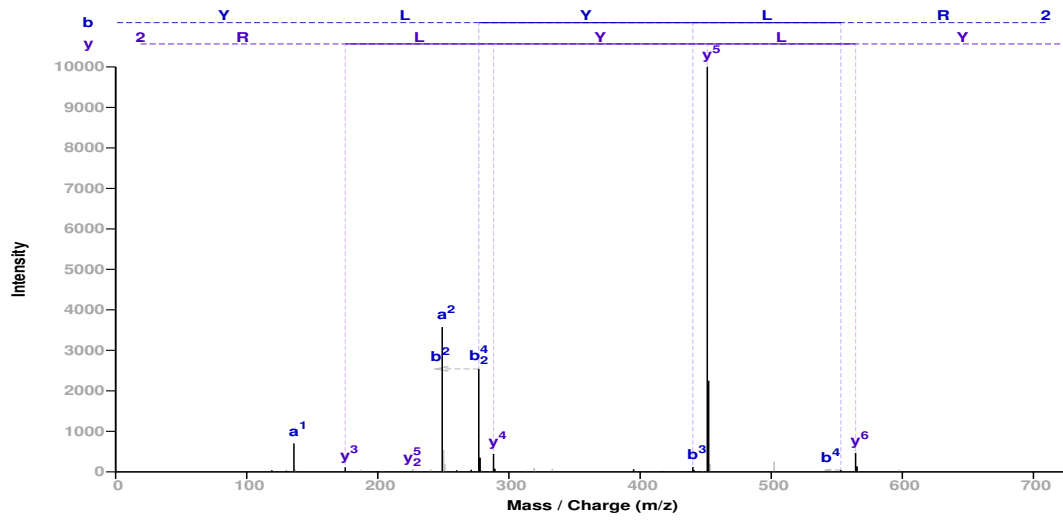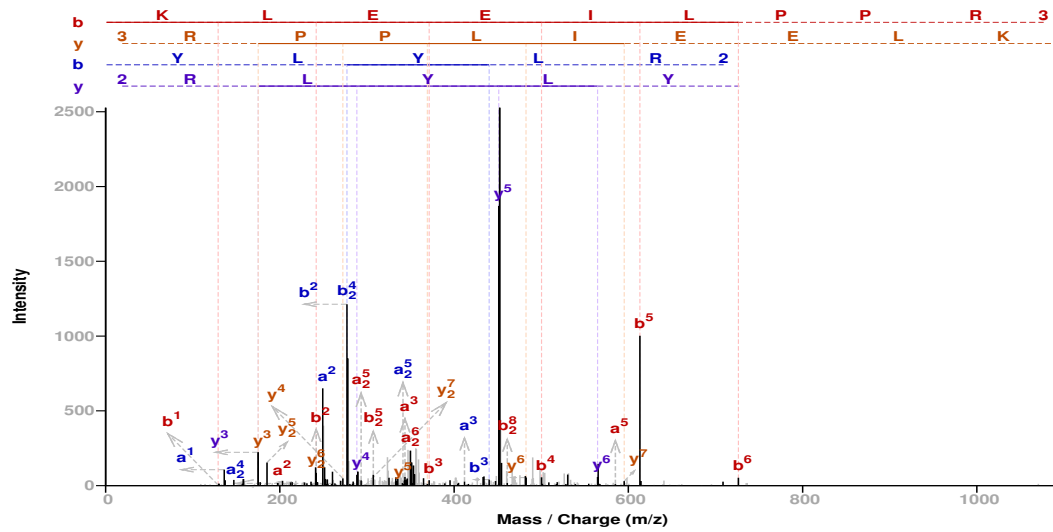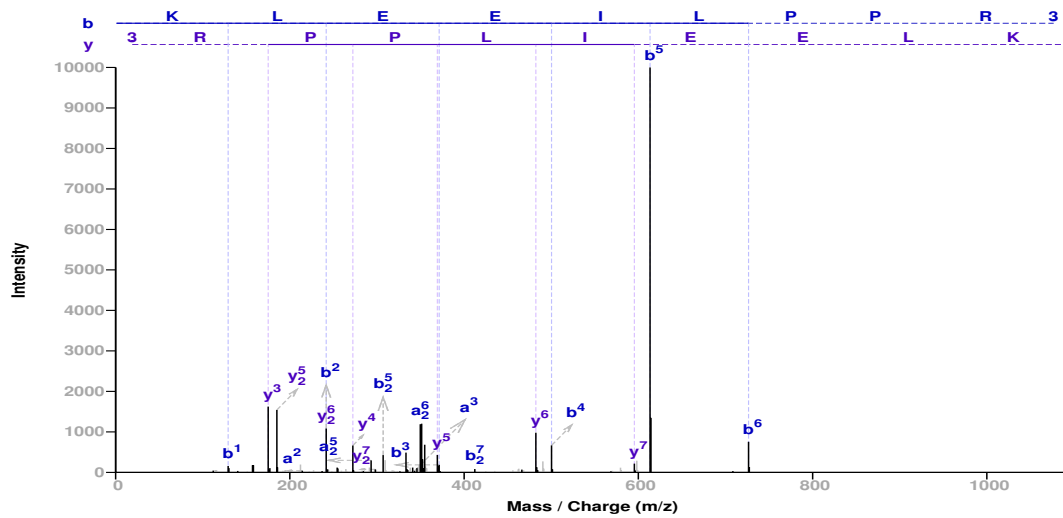

yeast0.Scan\_Number\_2508 Precursor m/z: 486.776 cosine: 0.753  $\alpha$ : 0.397

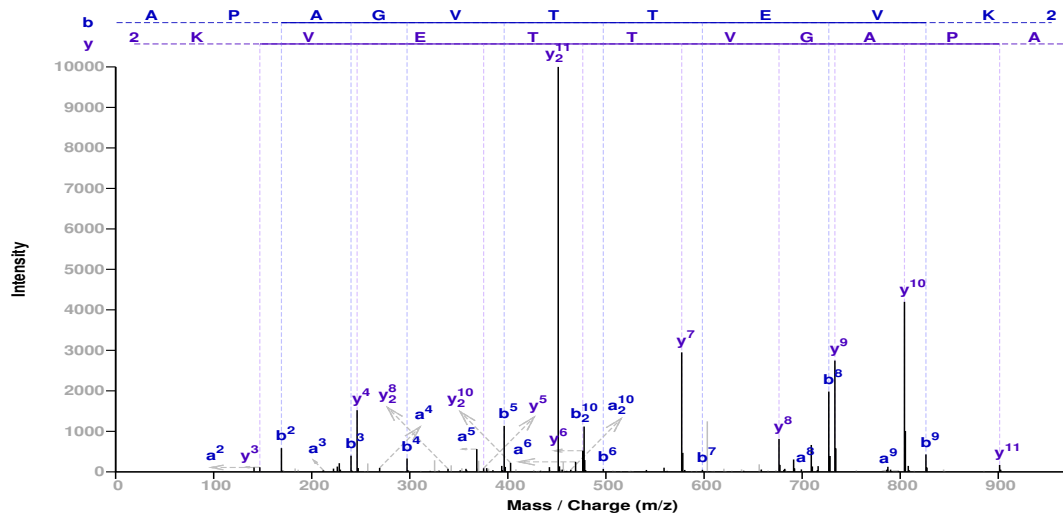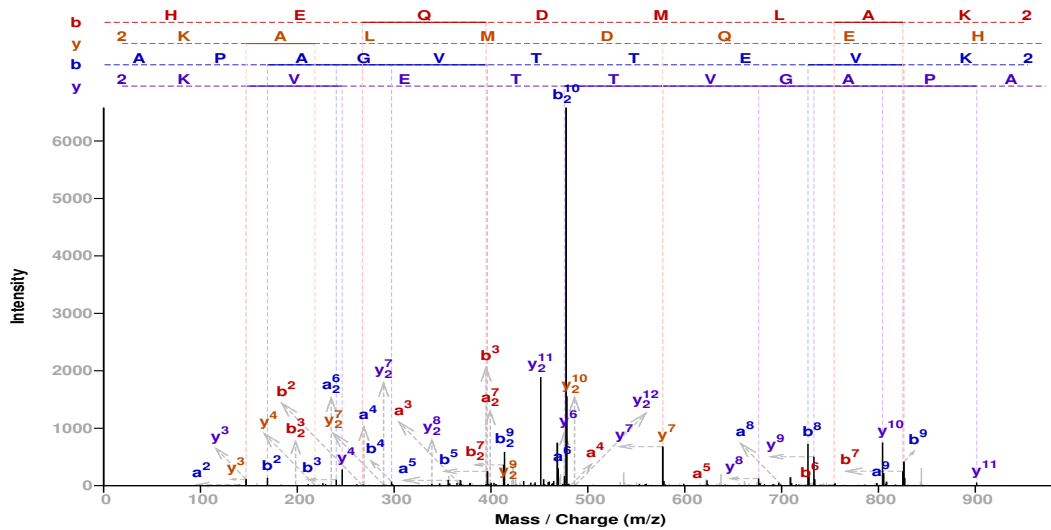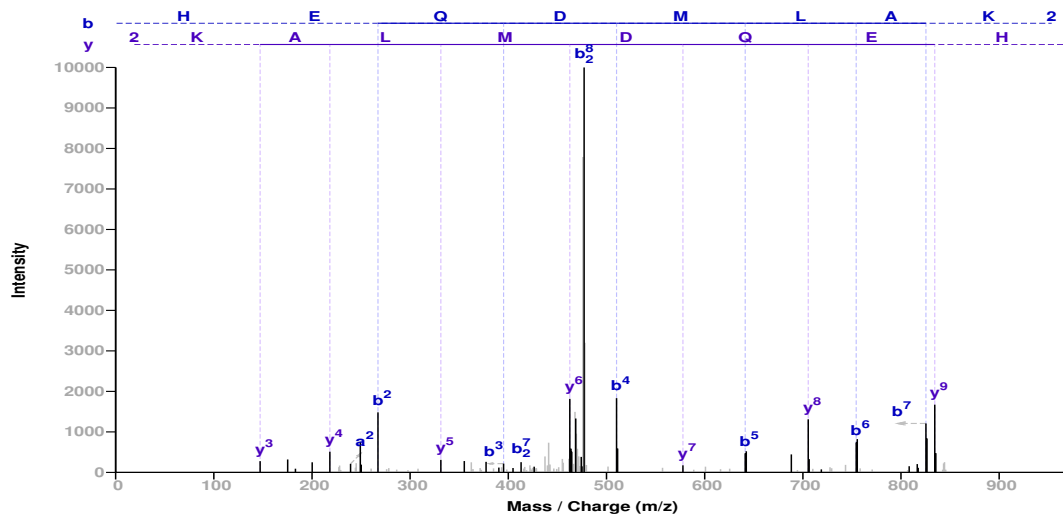

yeast0.Scan\_Number\_2502 Precursor m/z: 690.338 cosine: 0.853  $\alpha$ : 0.396

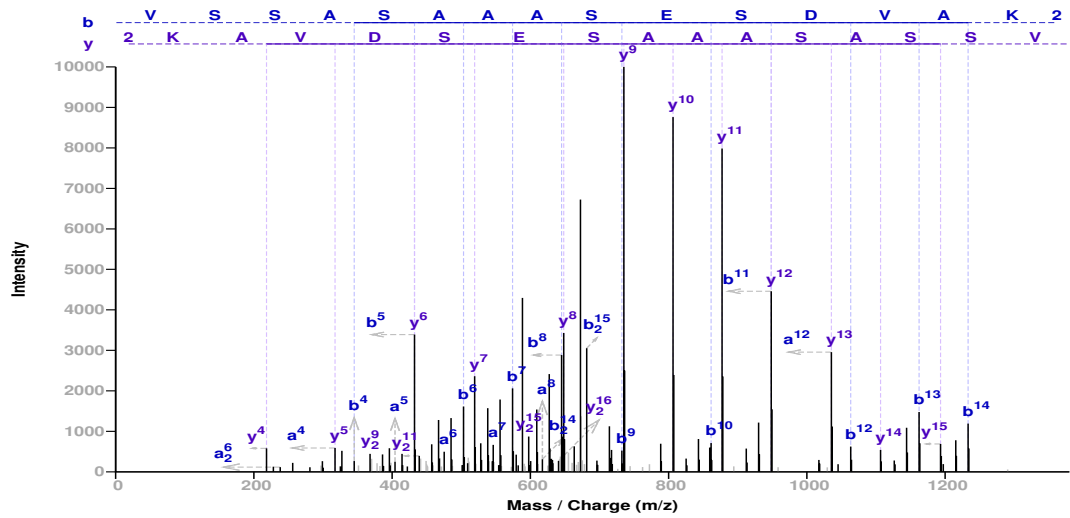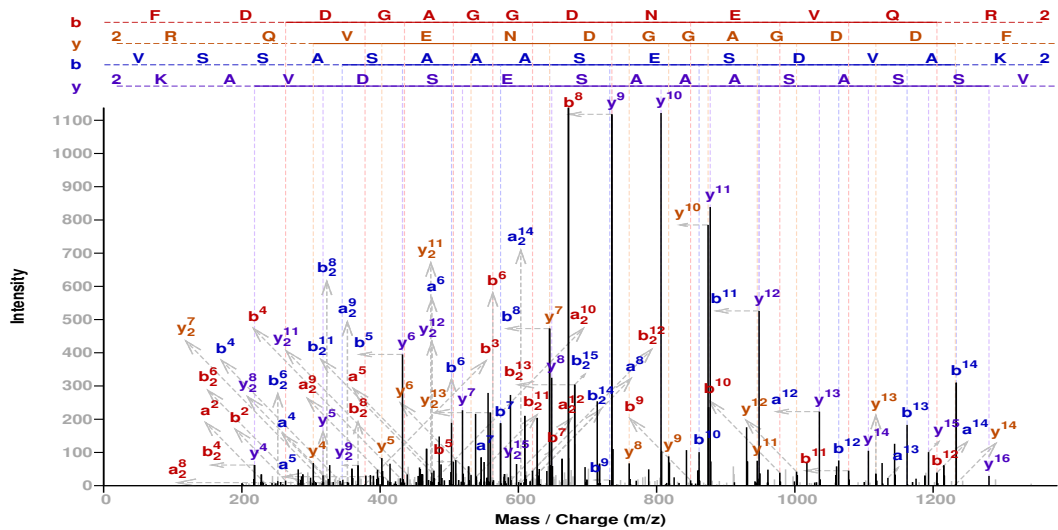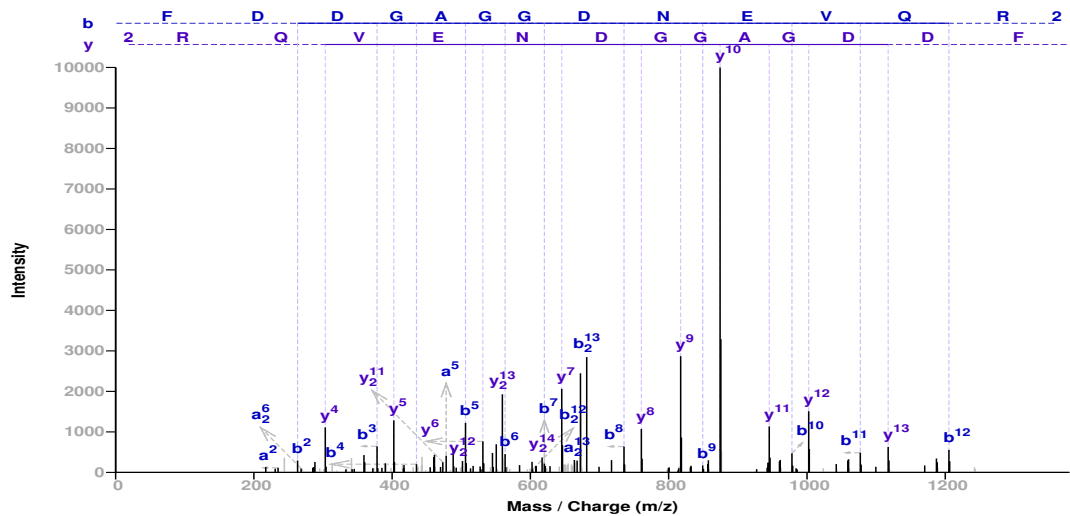

yeast0\_Scan\_Number\_3964 Precursor m/z: 396.873 cosine: 0.782  $\alpha$ : 0.392

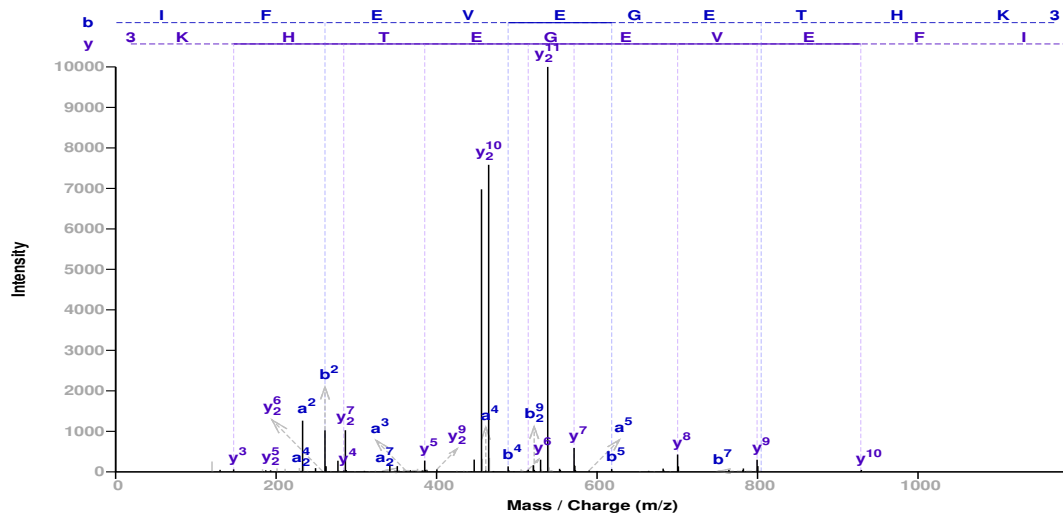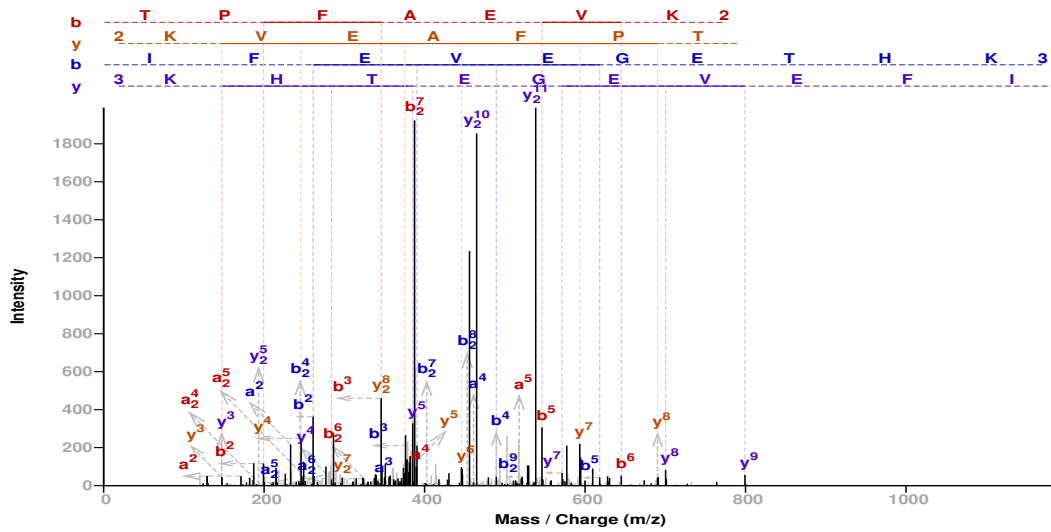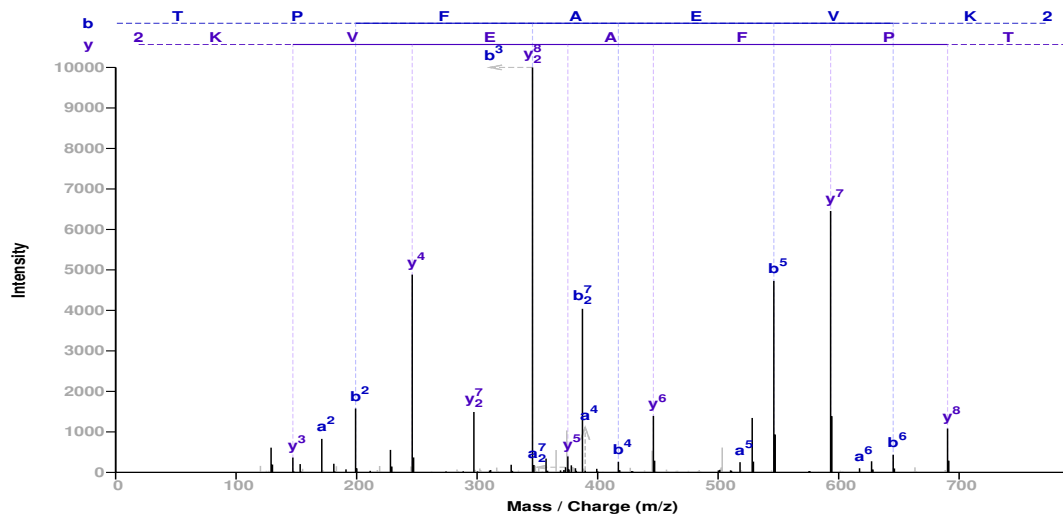

yeast0\_Scan\_Number\_1698 Precursor m/z: 413.887 cosine: 0.873  $\alpha$ : 0.391

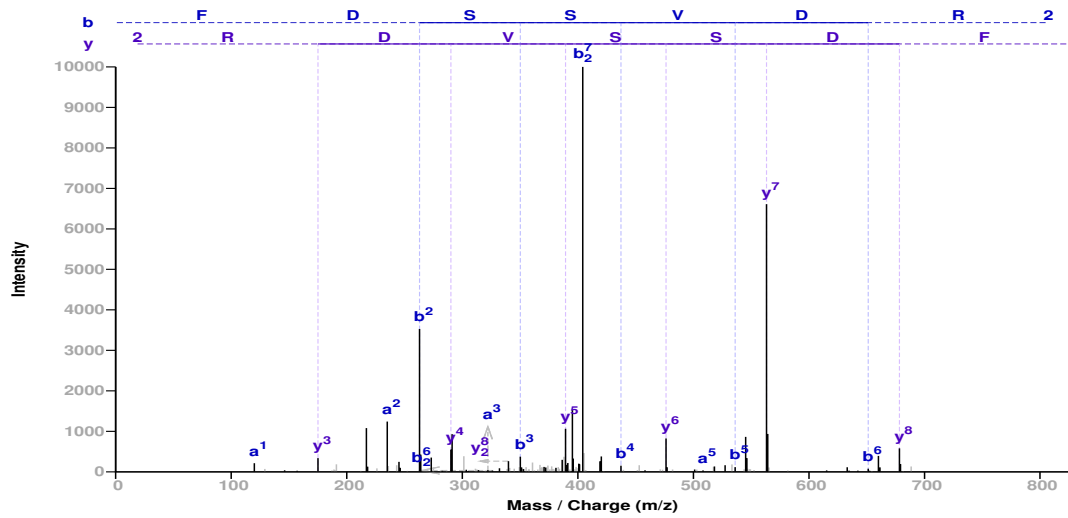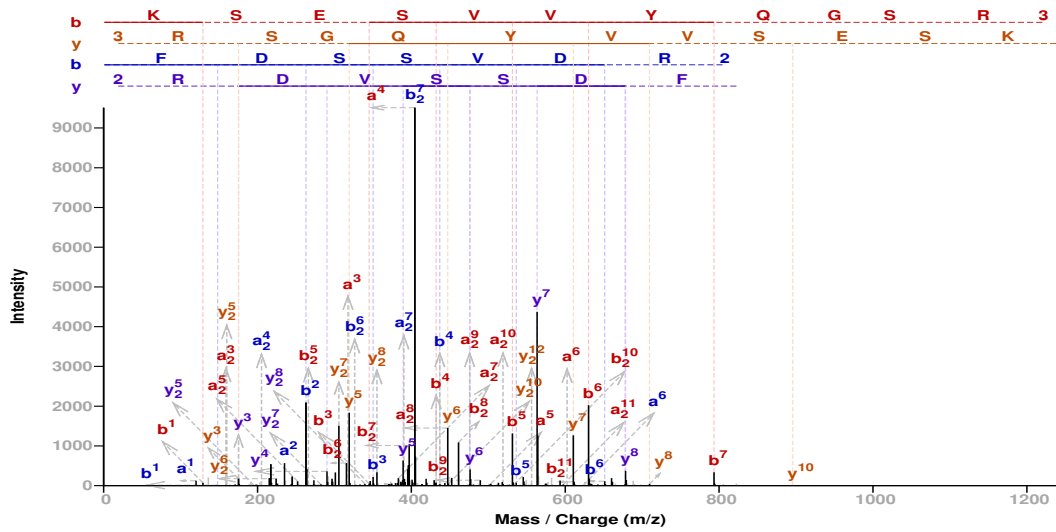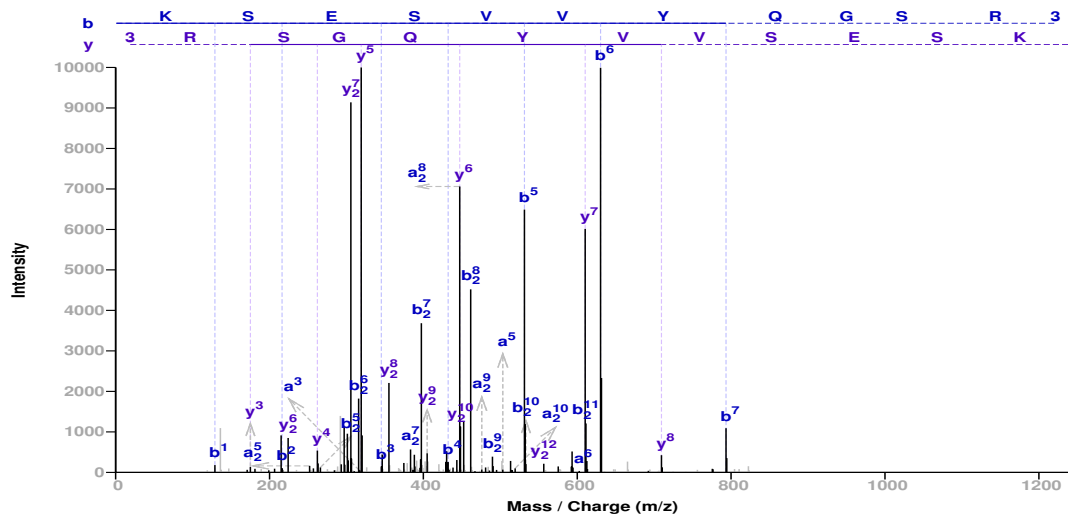



yeast0.Scan\_Number\_2204 Precursor m/z: 430.240 cosine: 0.744  $\alpha$ : 0.386

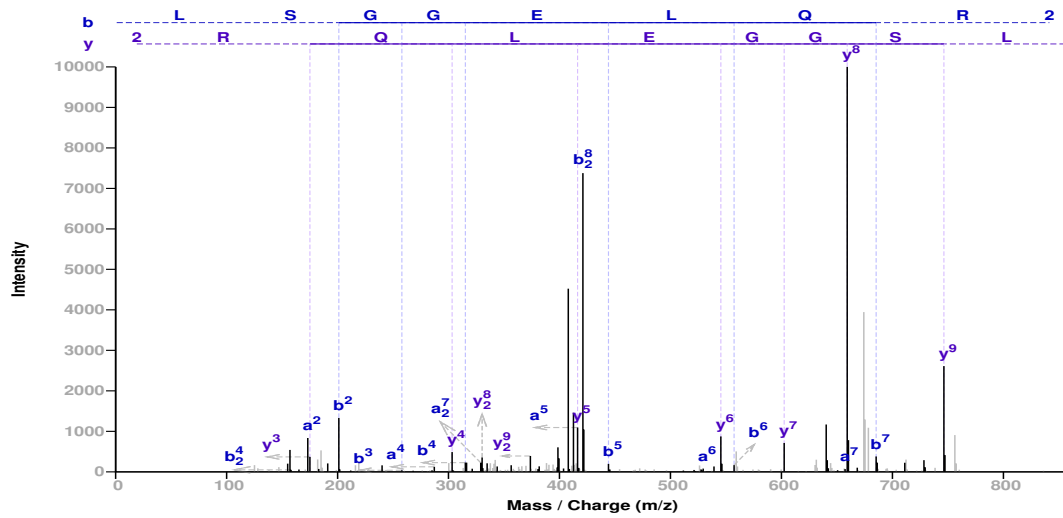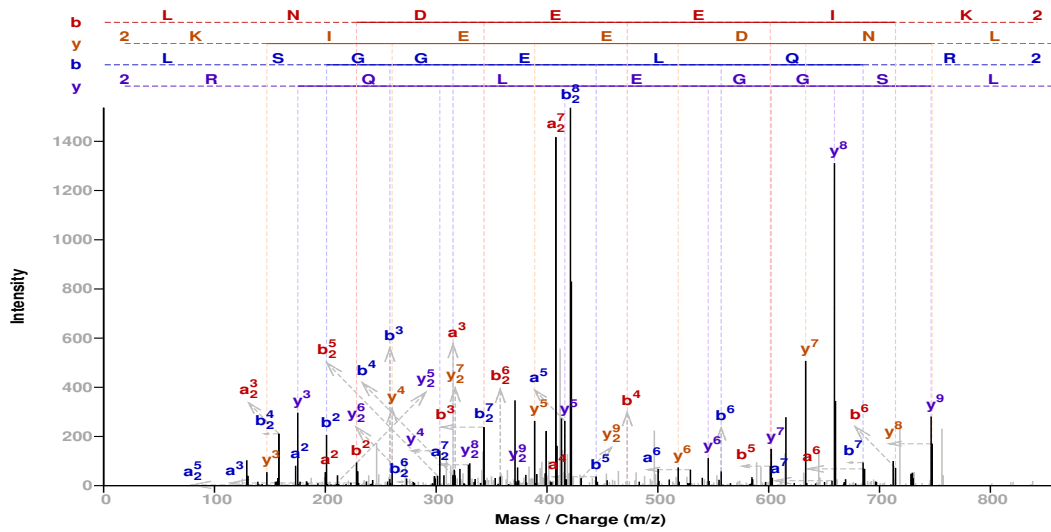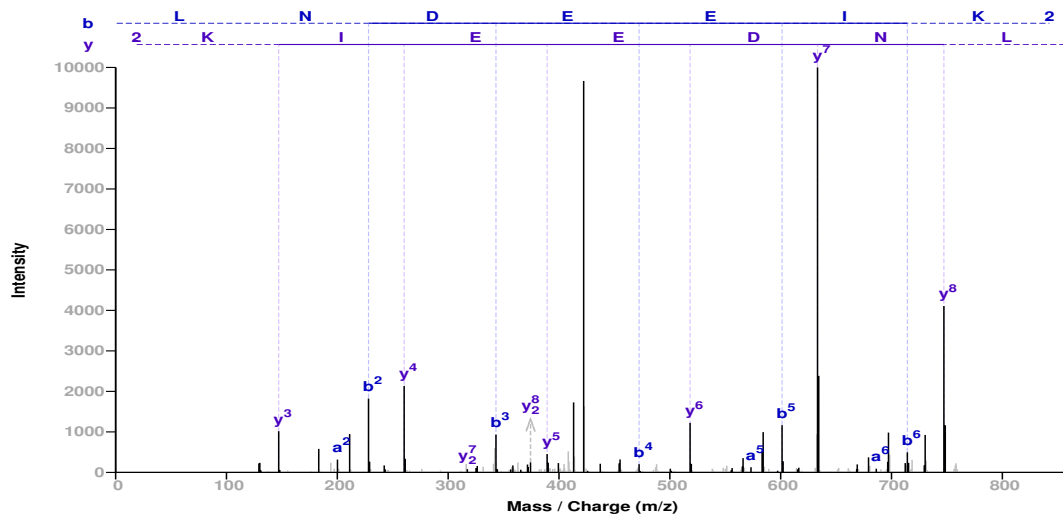

yeast0\_Scan\_Number\_5234 Precursor m/z: 462.578 cosine: 0.892  $\alpha$ : 0.385

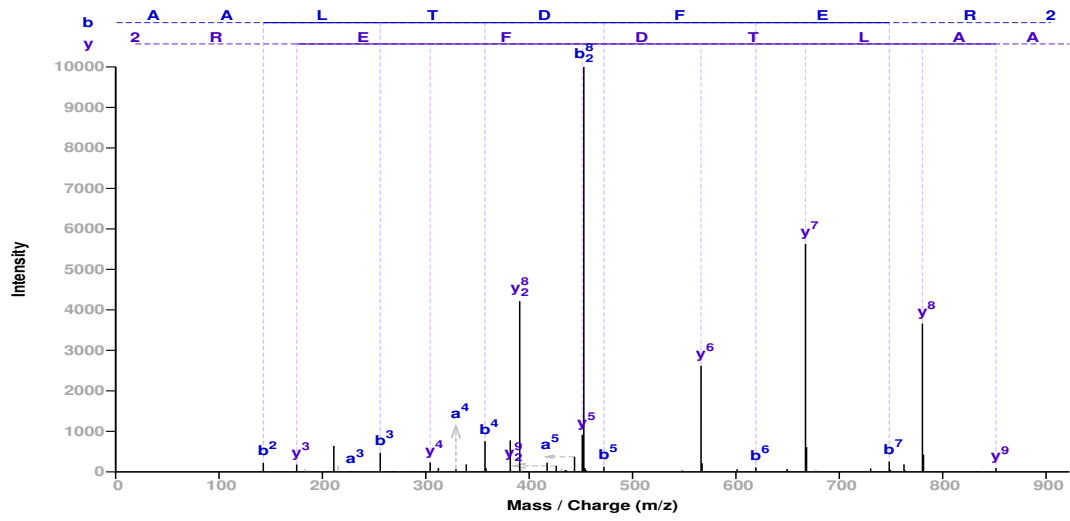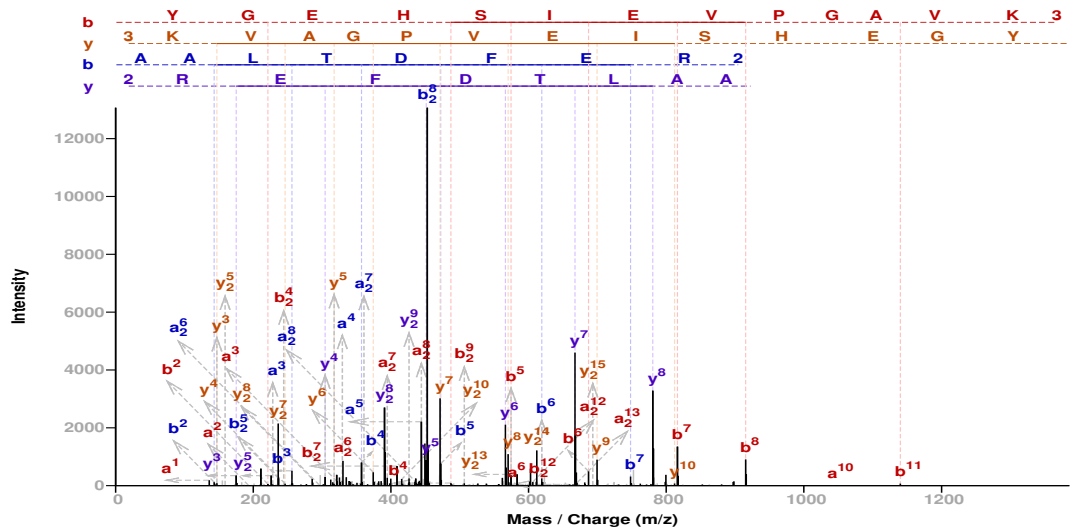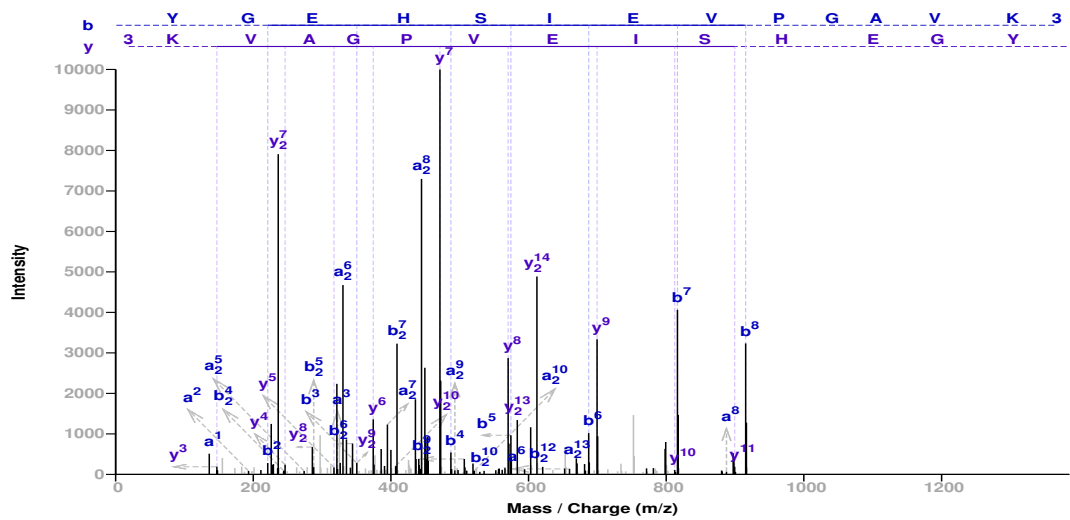

yeast0\_Scan\_Number\_4583 Precursor m/z: 473.274 cosine: 0.820  $\alpha$ : 0.384

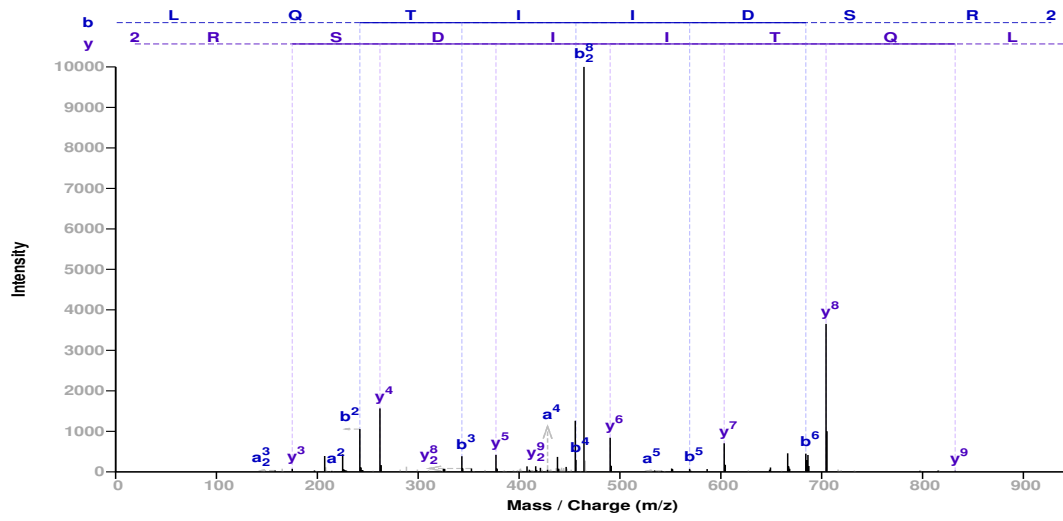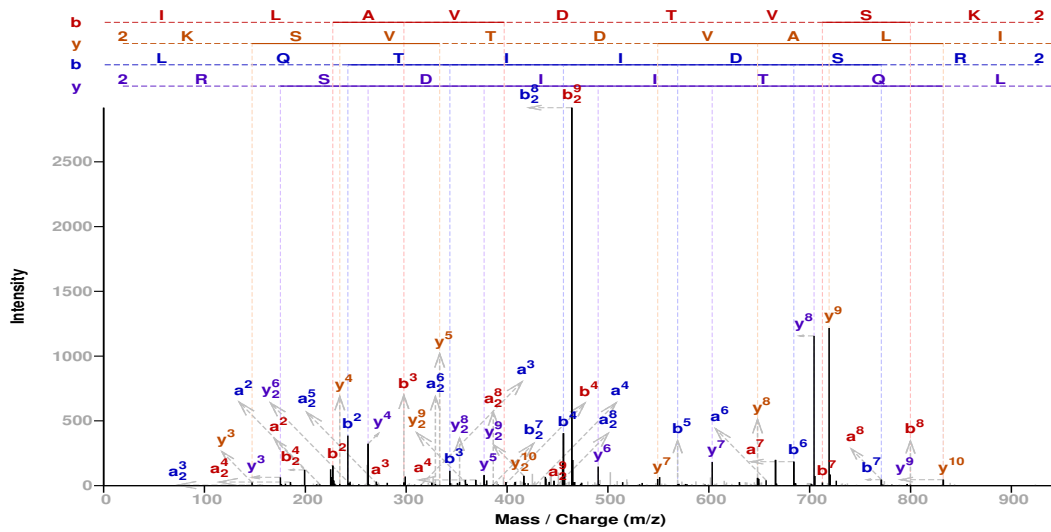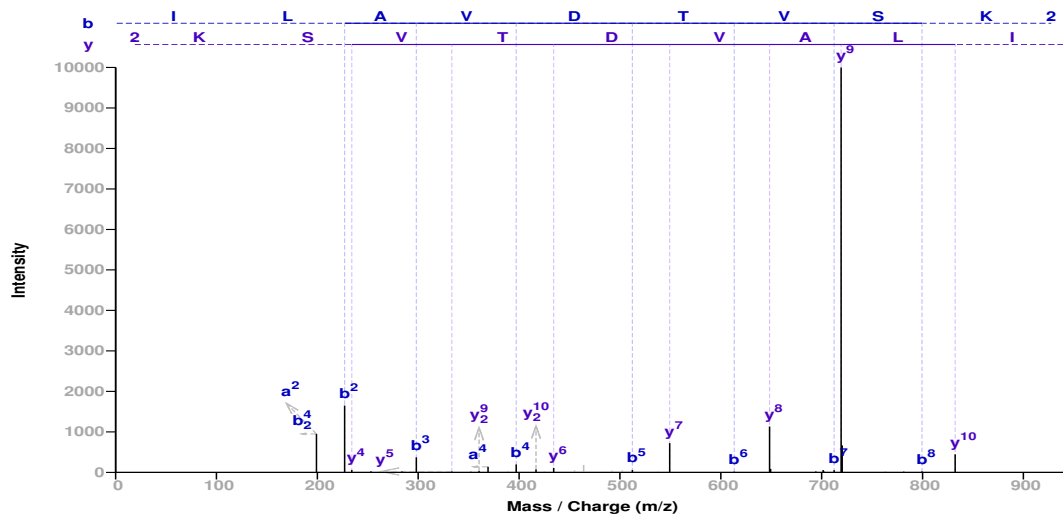

yeast0\_Scan\_Number\_2919 Precursor m/z: 414.755 cosine: 0.733  $\alpha$ : 0.380

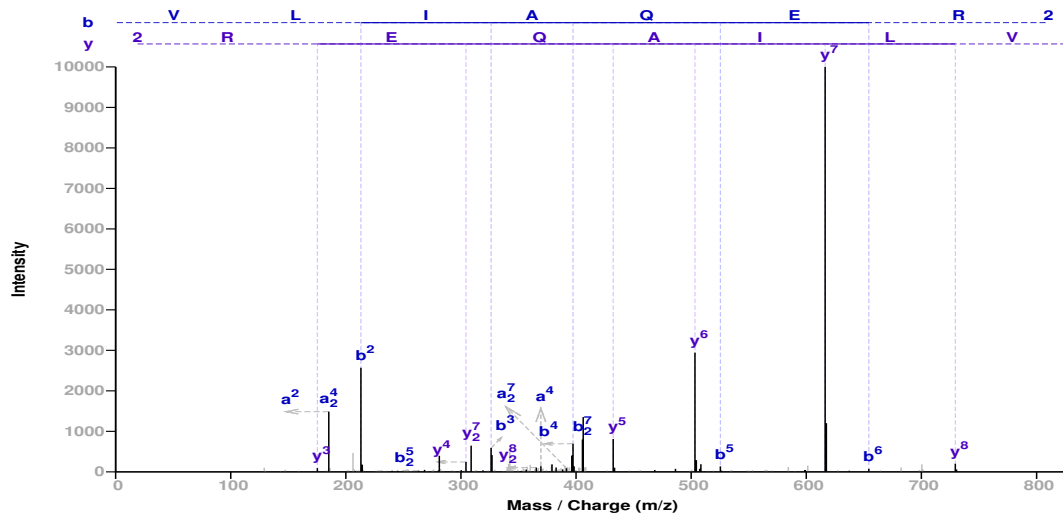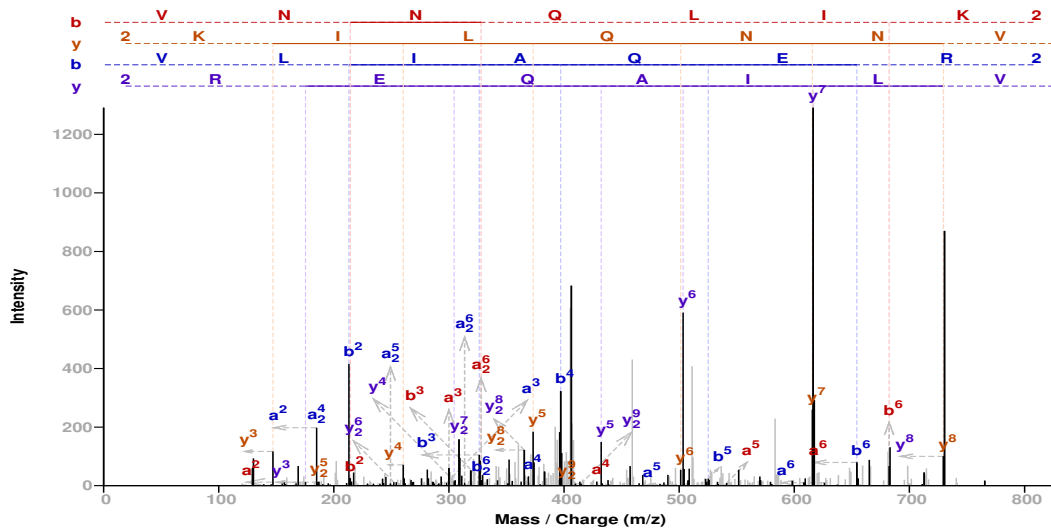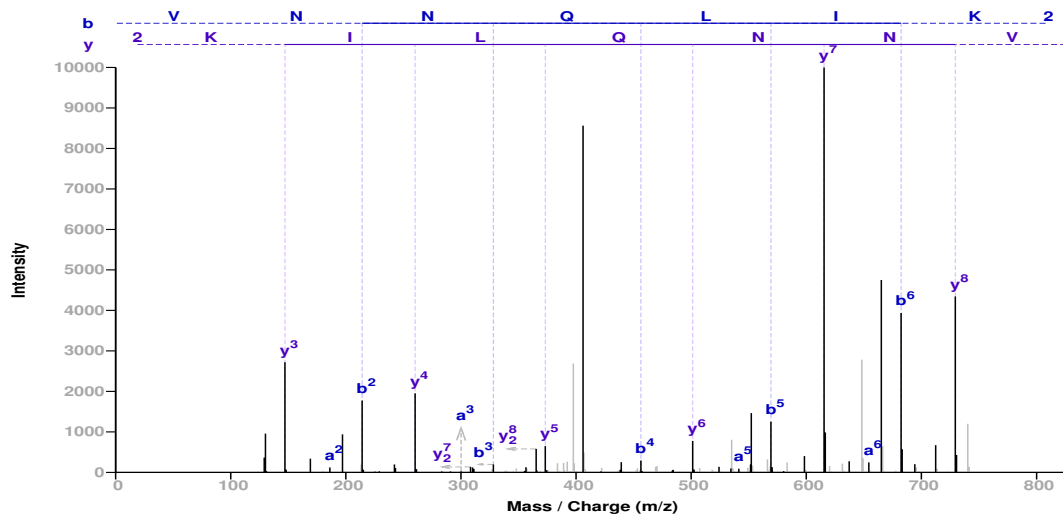

yeast0\_Scan\_Number\_3761 Precursor m/z: 717.875 cosine: 0.788  $\alpha$ : 0.375

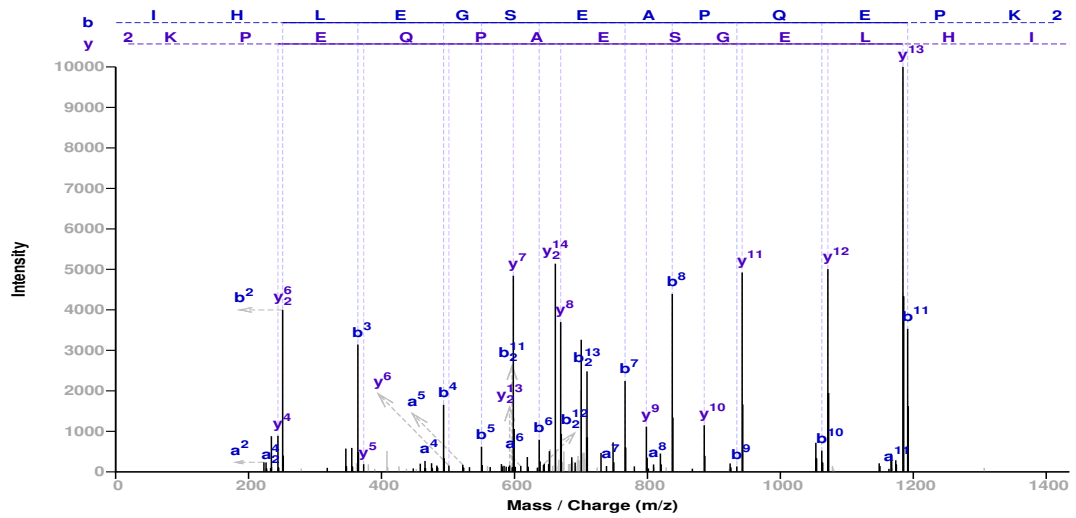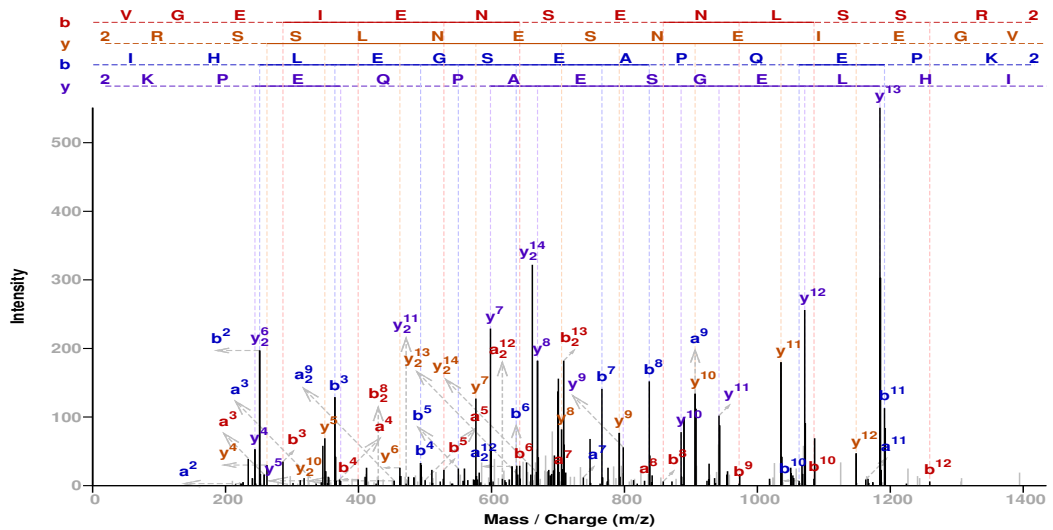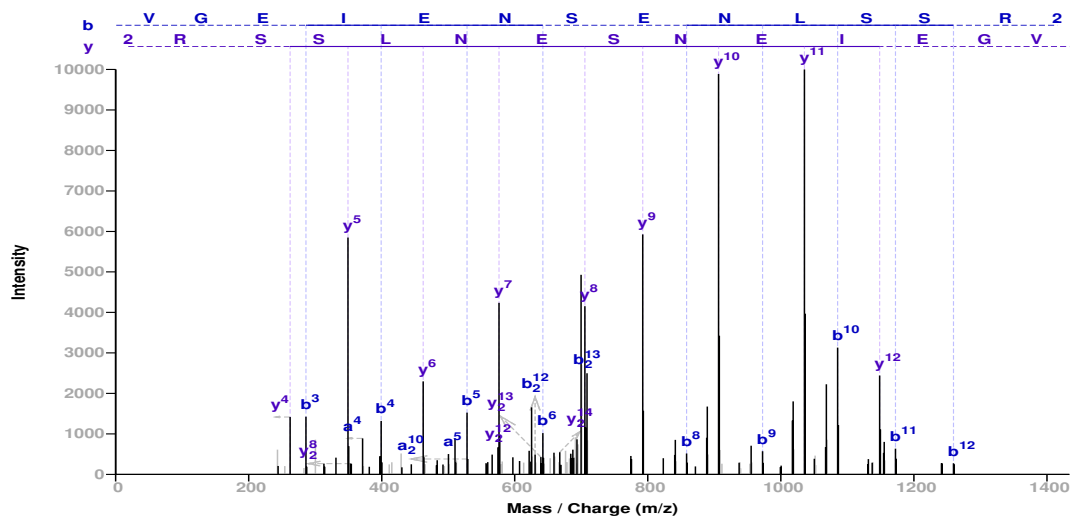

yeast0.Scan\_Number.1634 Precursor m/z: 504.915 cosine: 0.741  $\alpha$ : 0.374

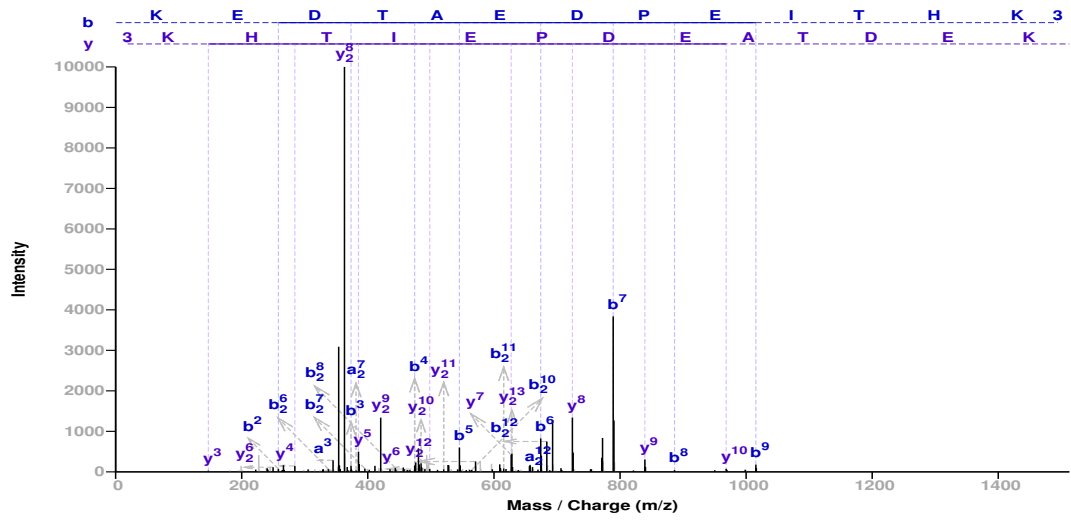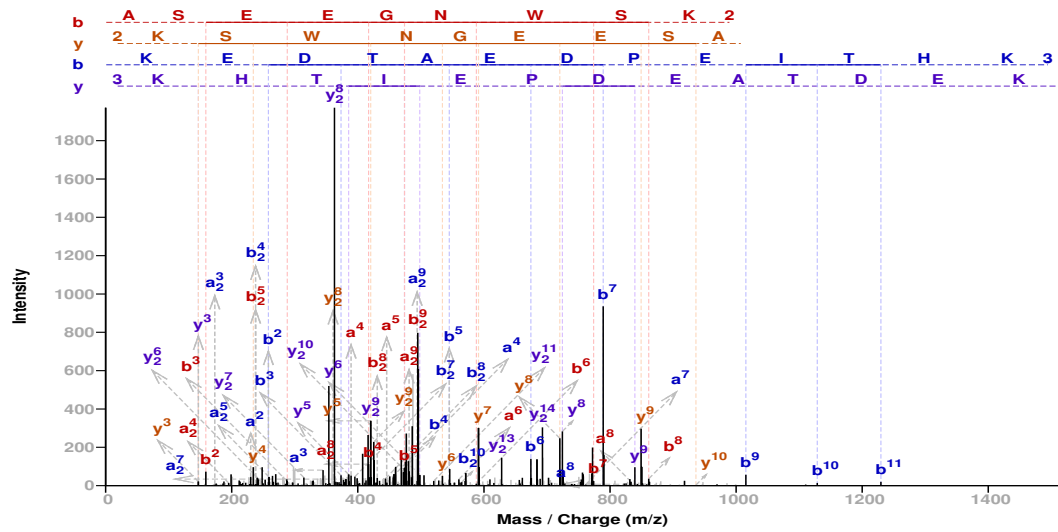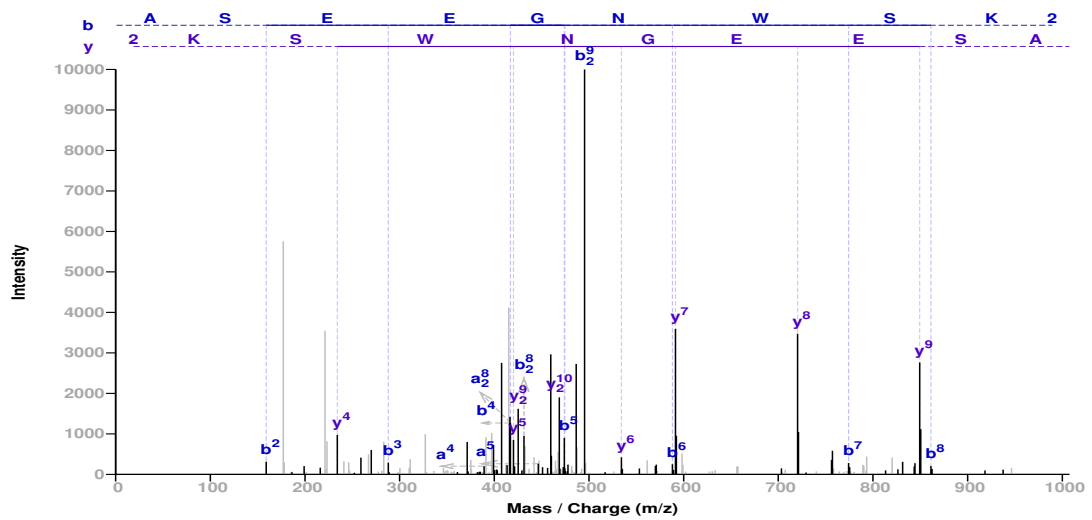

yeast0\_Scan\_Number\_504 Precursor m/z: 469.232 cosine: 0.788  $\alpha$ : 0.371

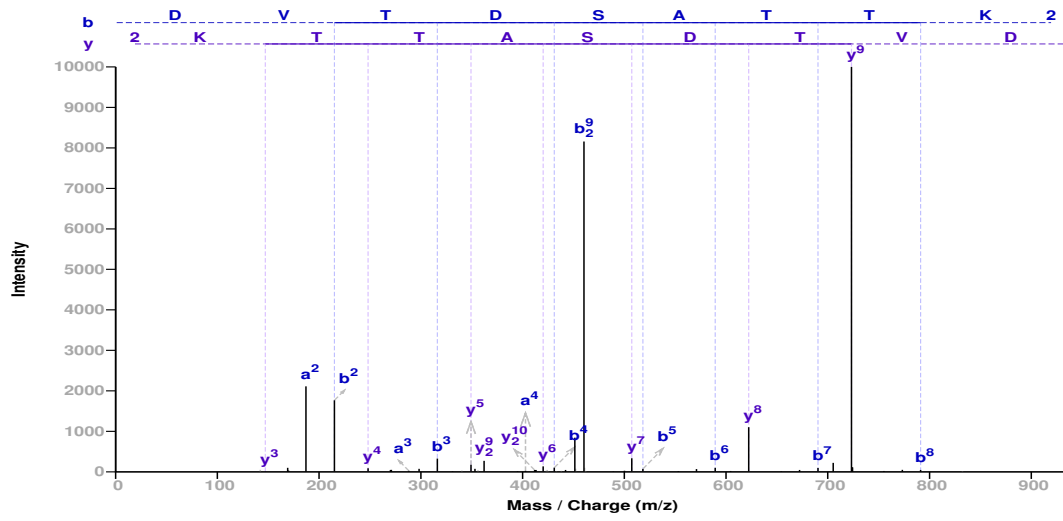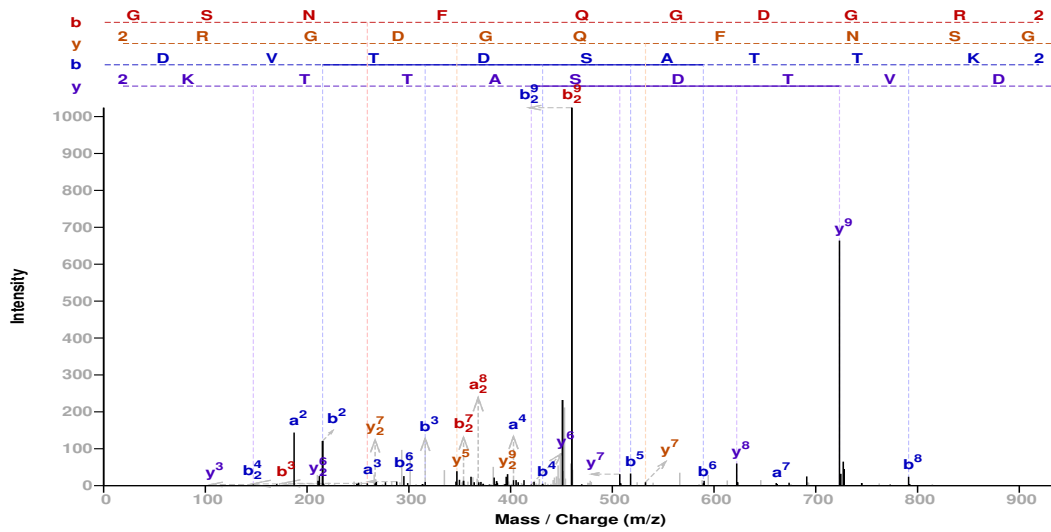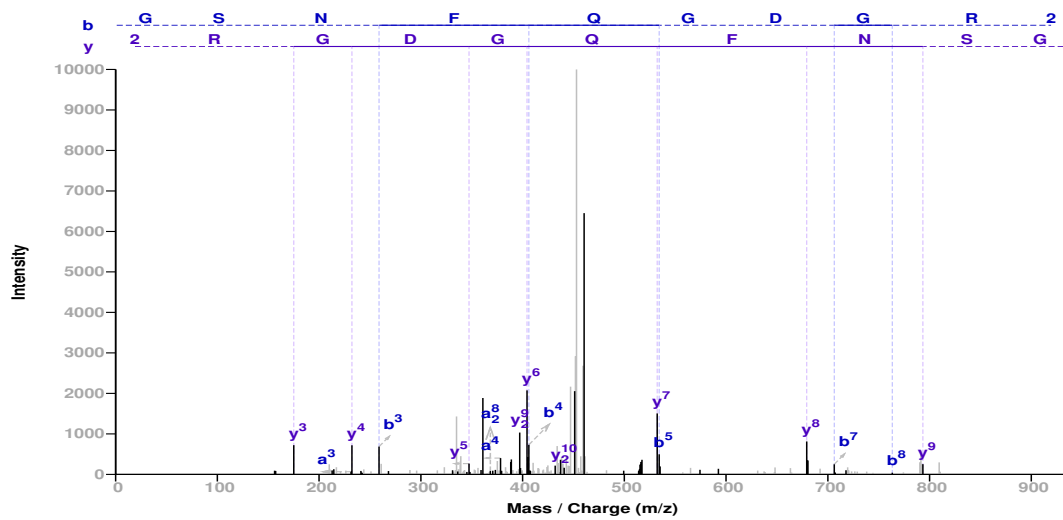

yeast0.Scan\_Number\_4163 Precursor m/z: 626.856 cosine: 0.800  $\alpha$ : 0.370

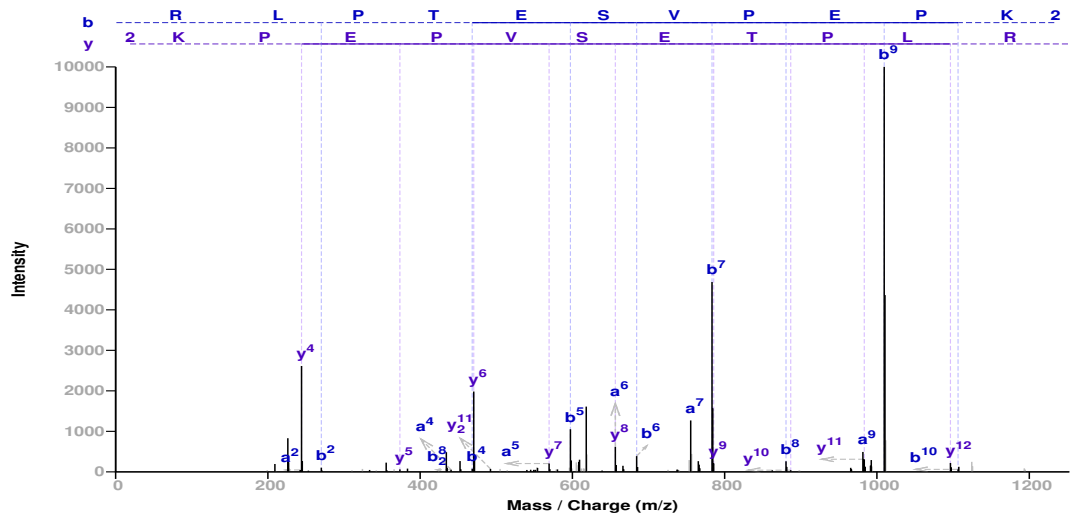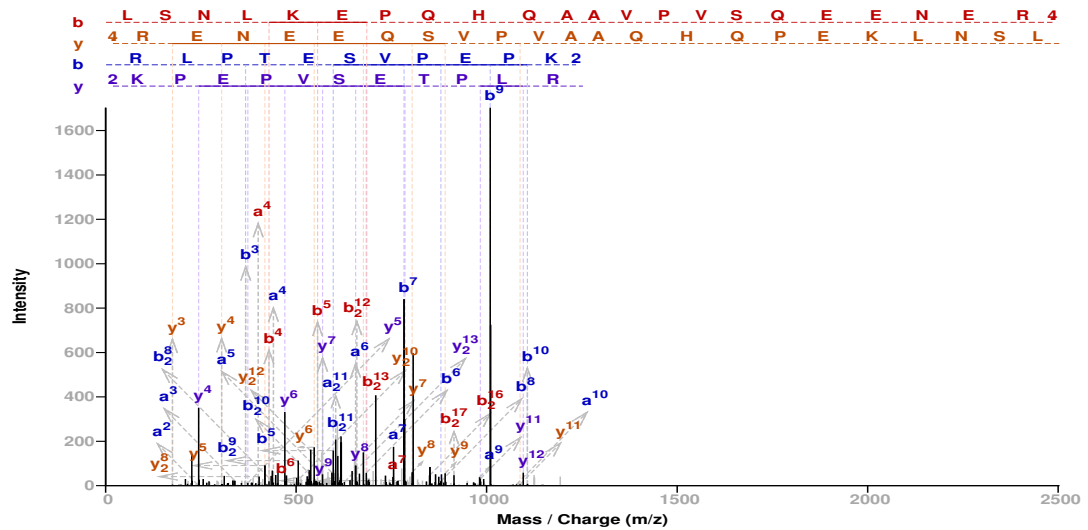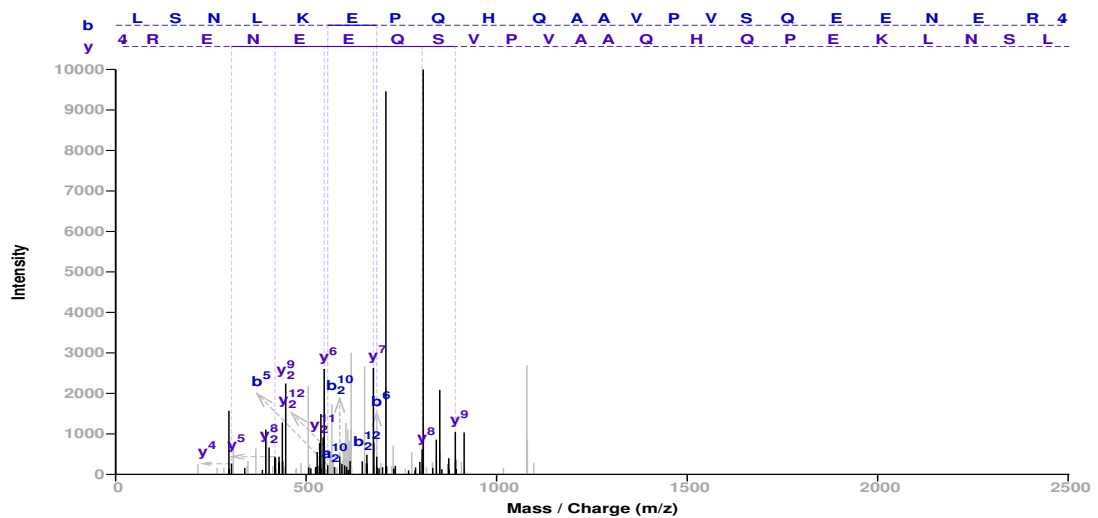



yeast0\_Scan\_Number\_5834 Precursor m/z: 633.337 cosine: 0.773  $\alpha$ : 0.368

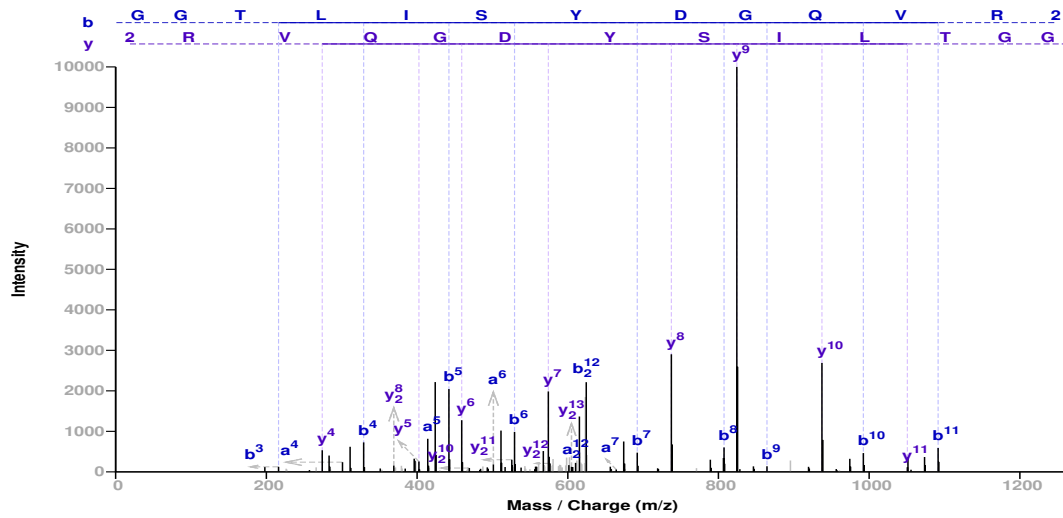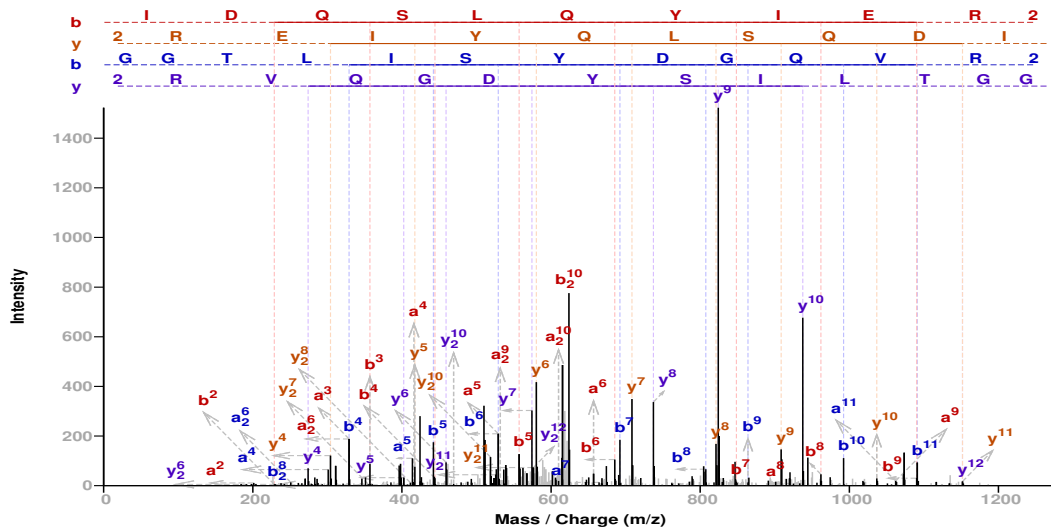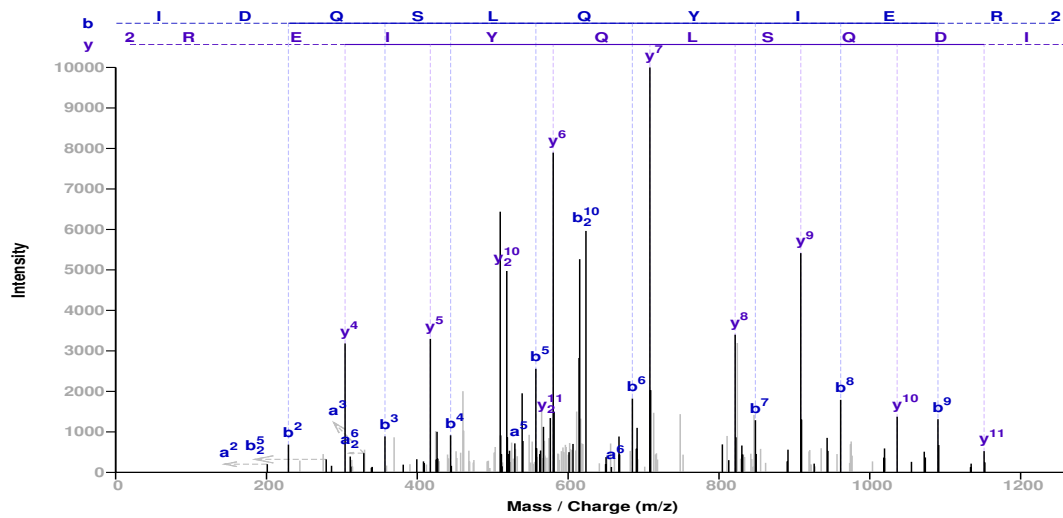

yeast0\_Scan\_Number\_3678 Precursor m/z: 368.720 cosine: 0.918  $\alpha$ : 0.368

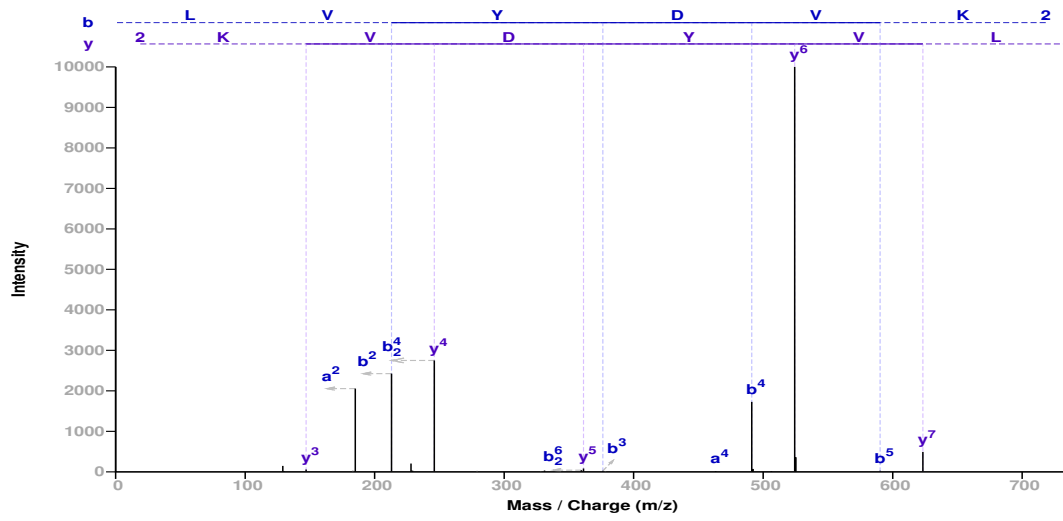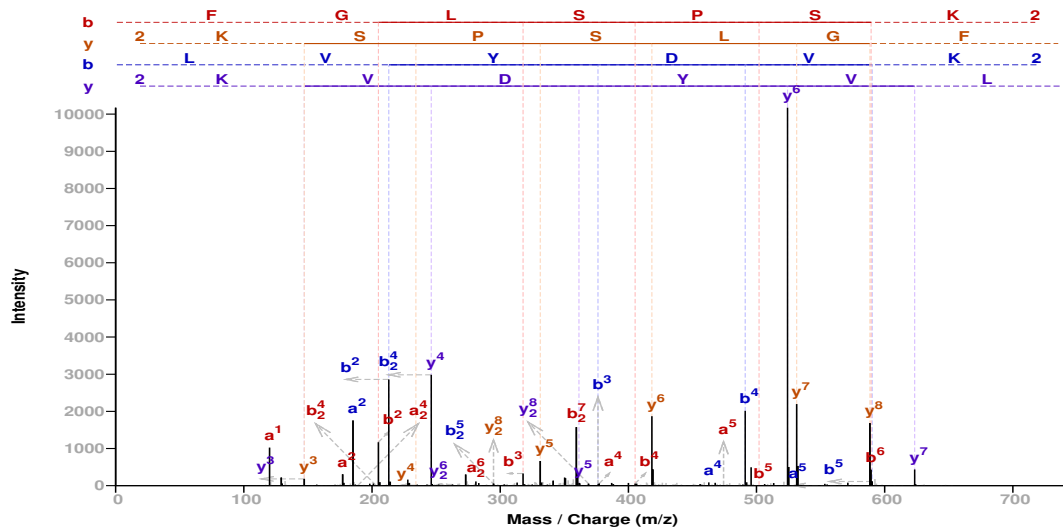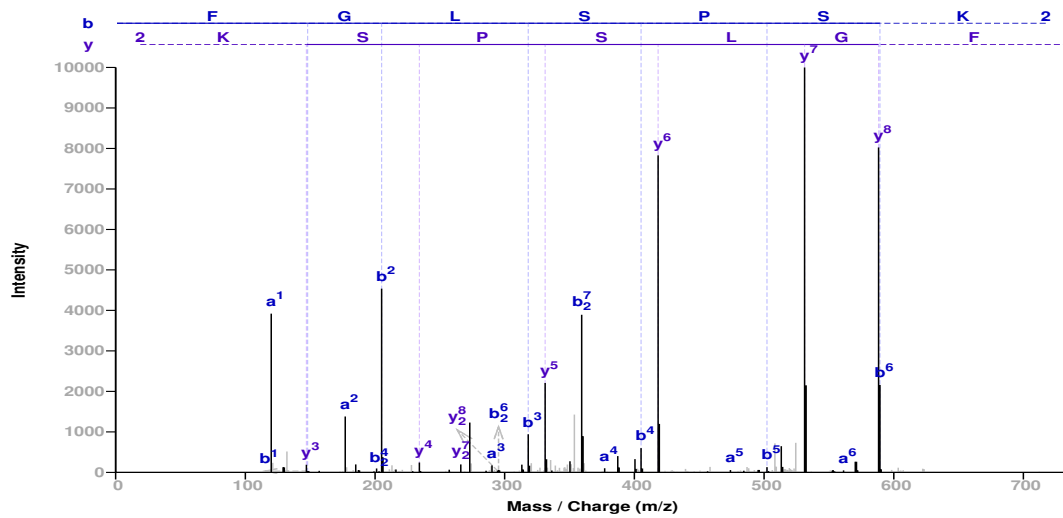

yeast0.Scan\_Number\_2297 Precursor m/z: 415.726 cosine: 0.773  $\alpha$ : 0.365

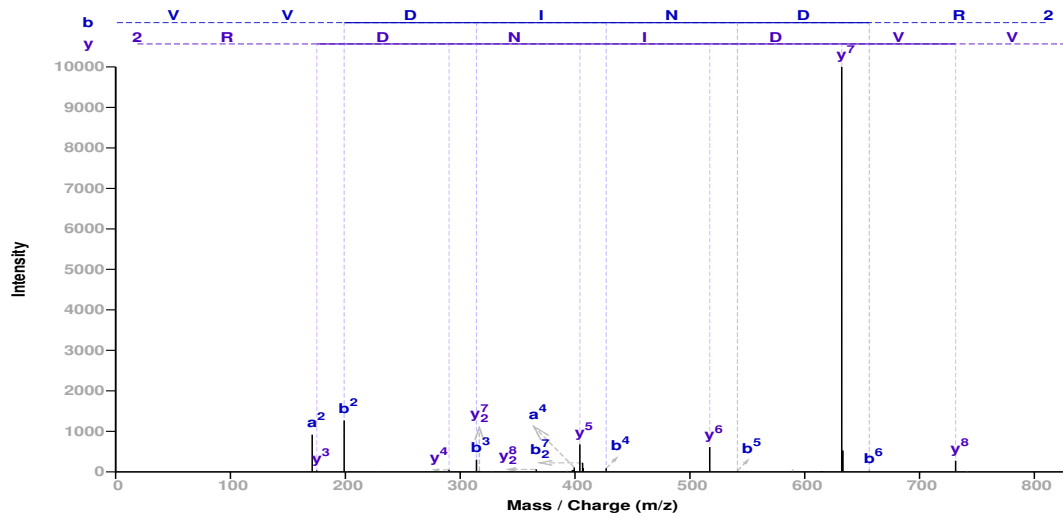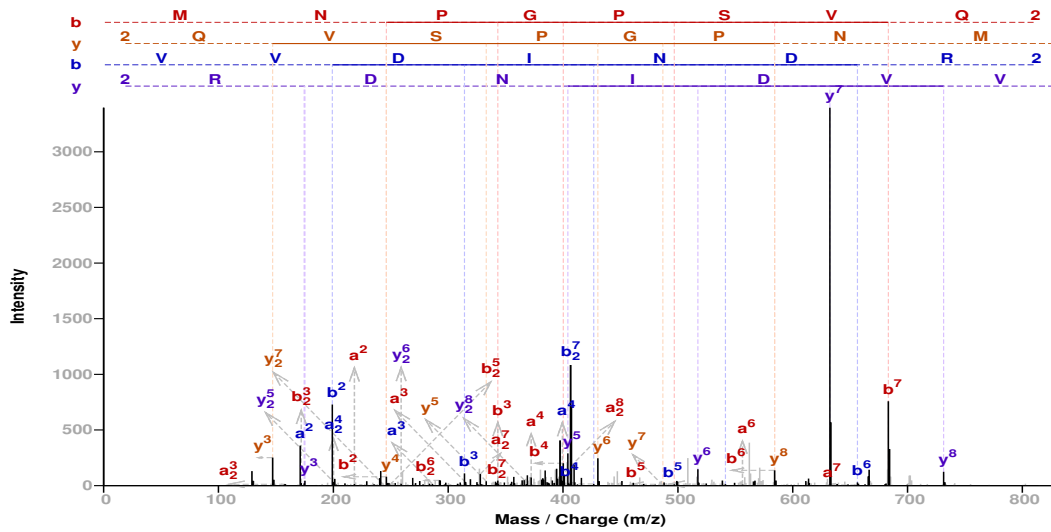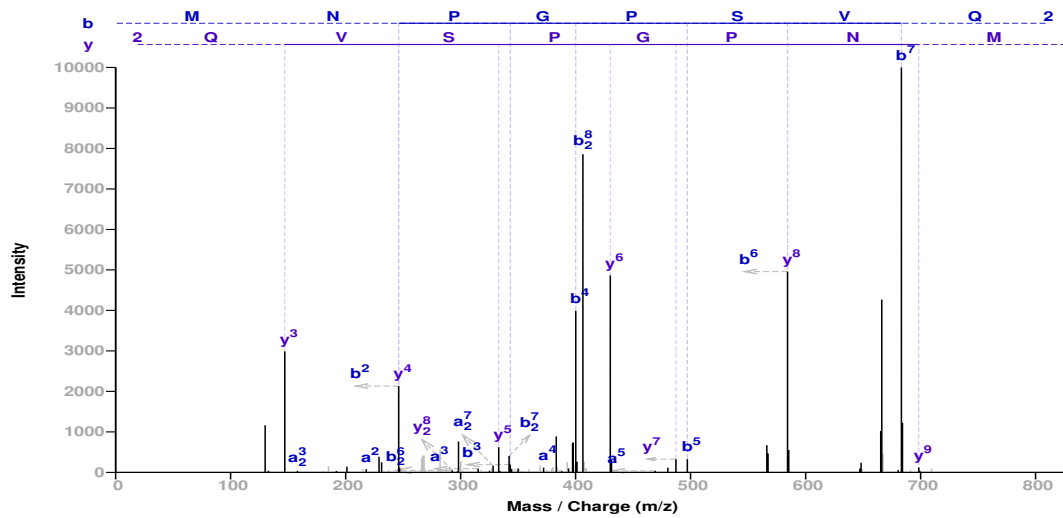

yeast0\_Scan\_Number\_3914 Precursor m/z: 457.281 cosine: 0.876  $\alpha$ : 0.361

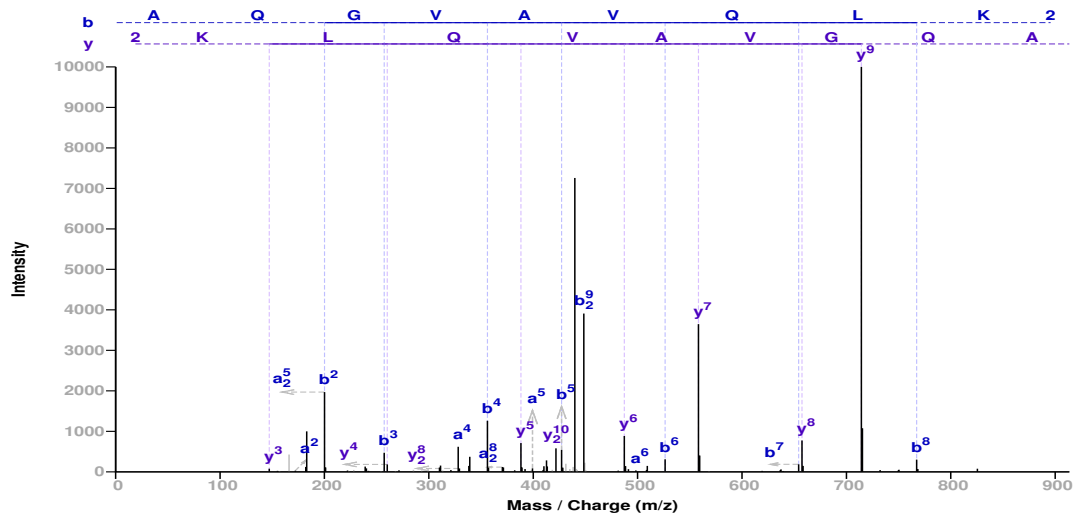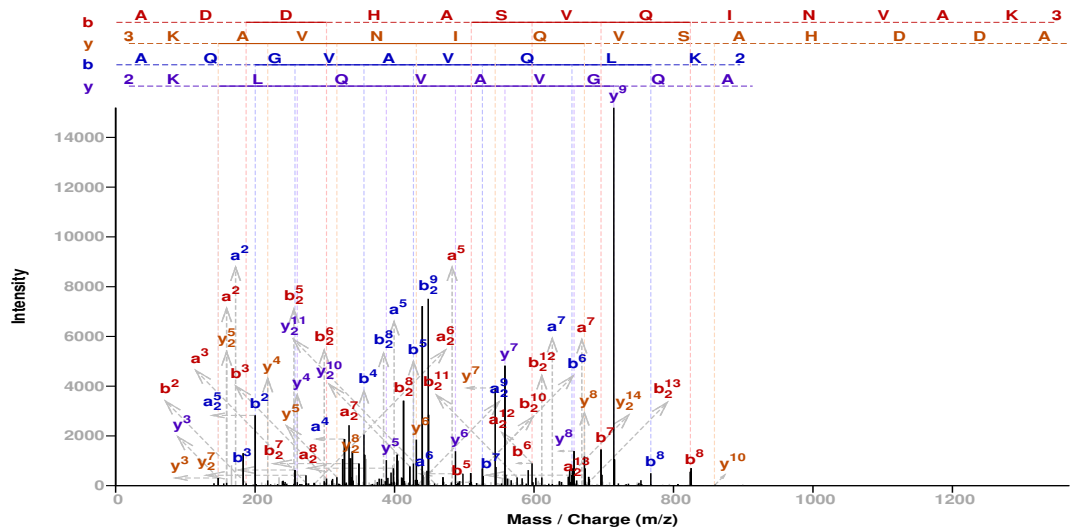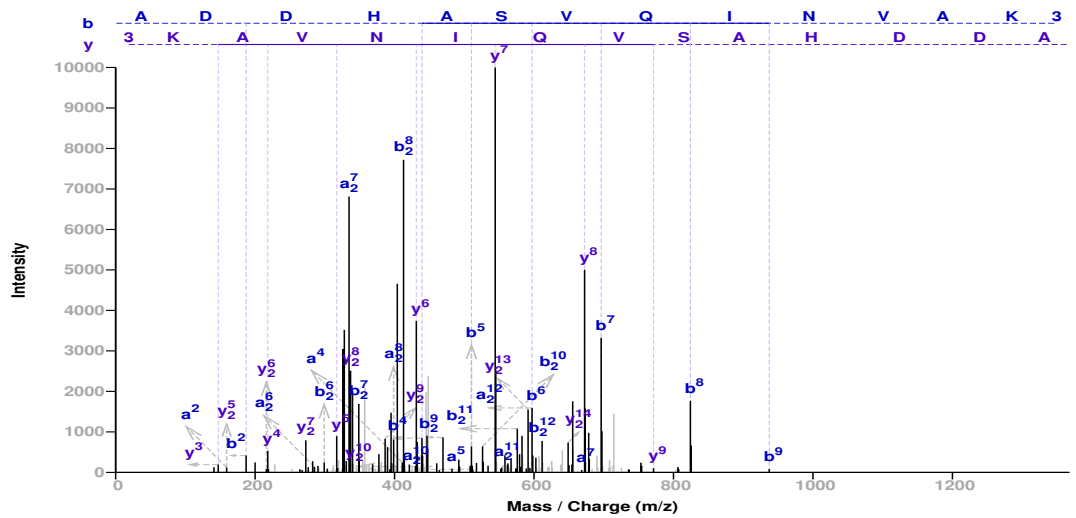

yeast0.Scan\_Number\_2559 Precursor m/z: 467.745 cosine: 0.817  $\alpha$ : 0.358

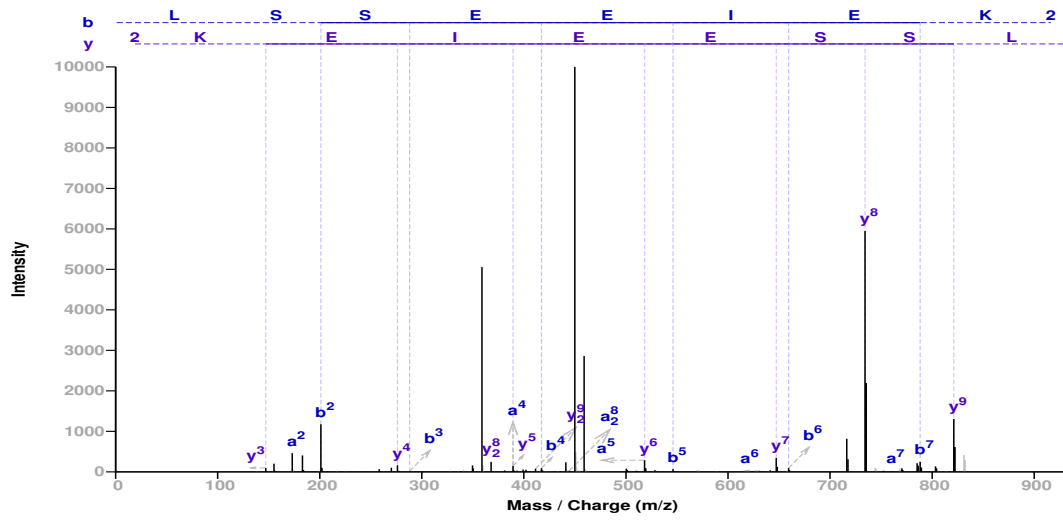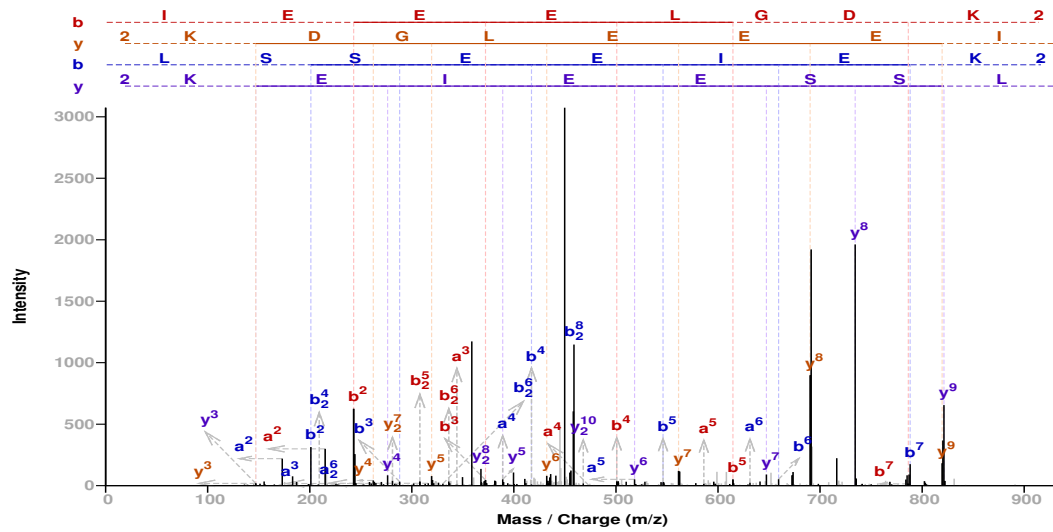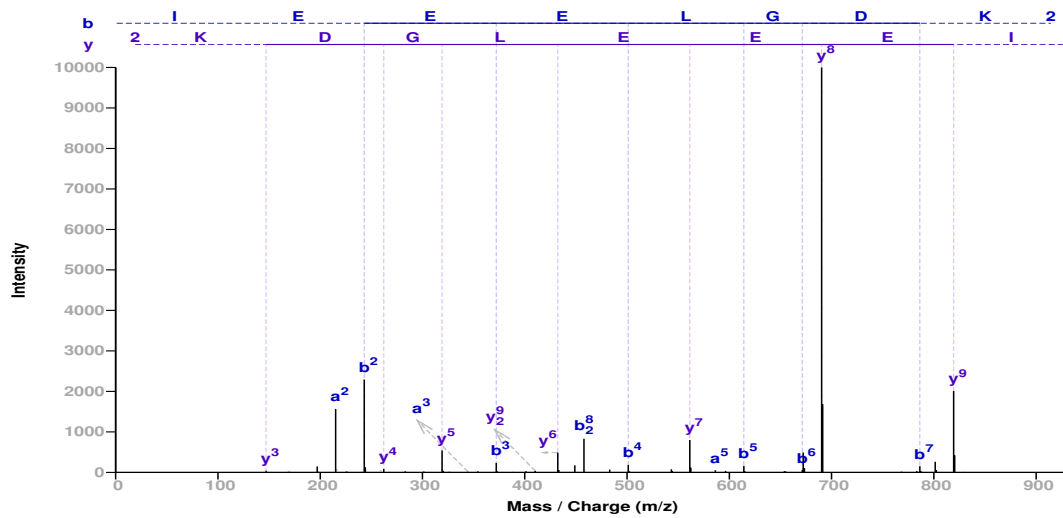

yeast0.Scan\_Number\_4749 Precursor m/z: 368.210 cosine: 0.740  $\alpha$ : 0.352

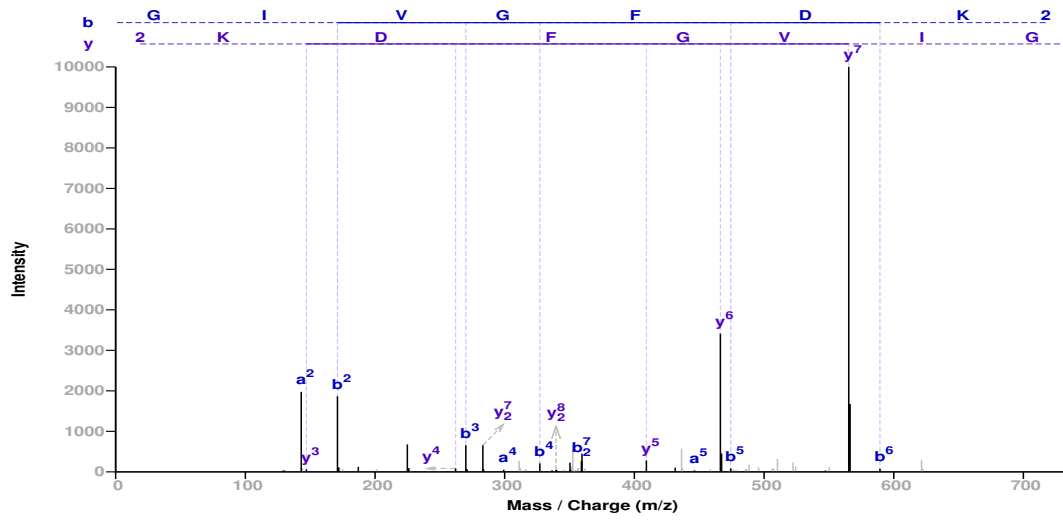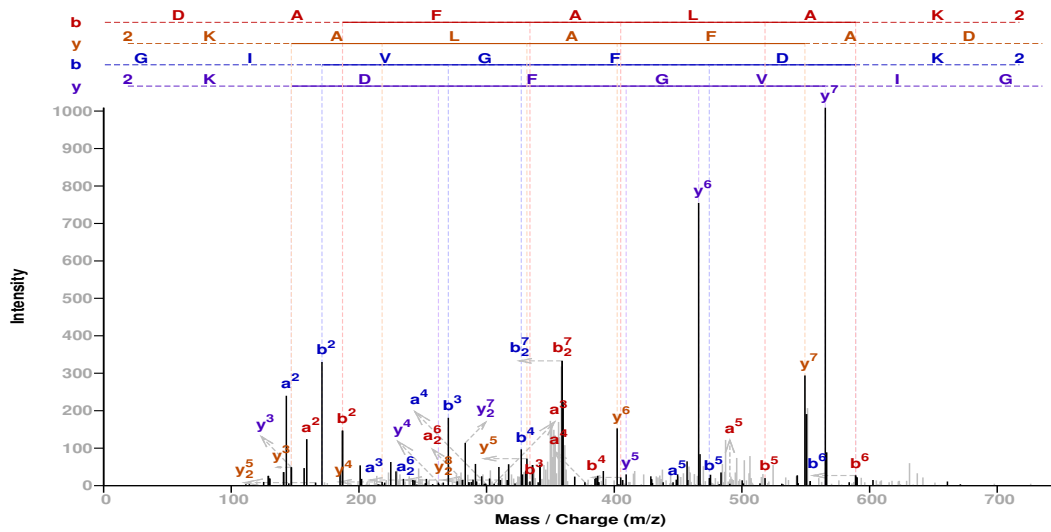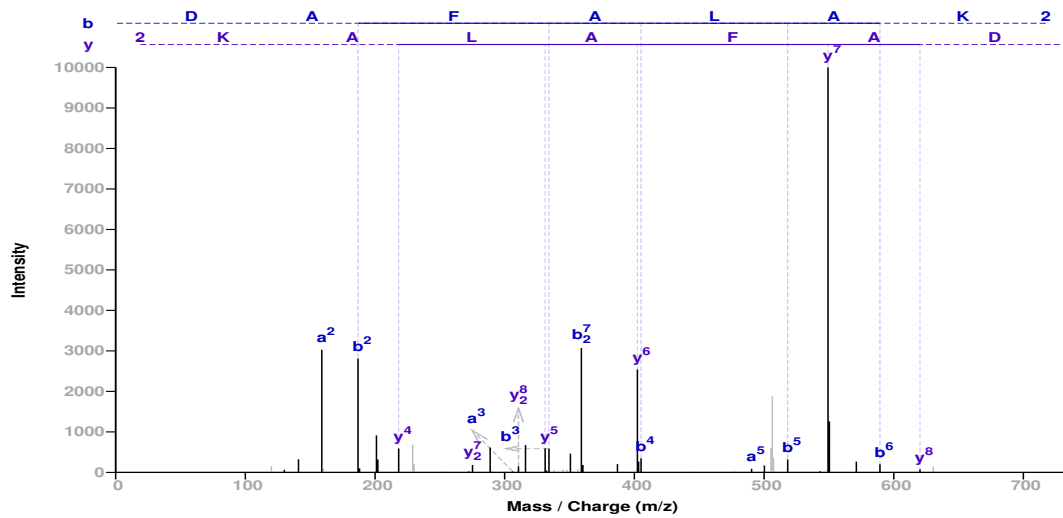

yeast0.Scan\_Number.10453 Precursor m/z: 688.371 cosine: 0.750  $\alpha$ : 0.350

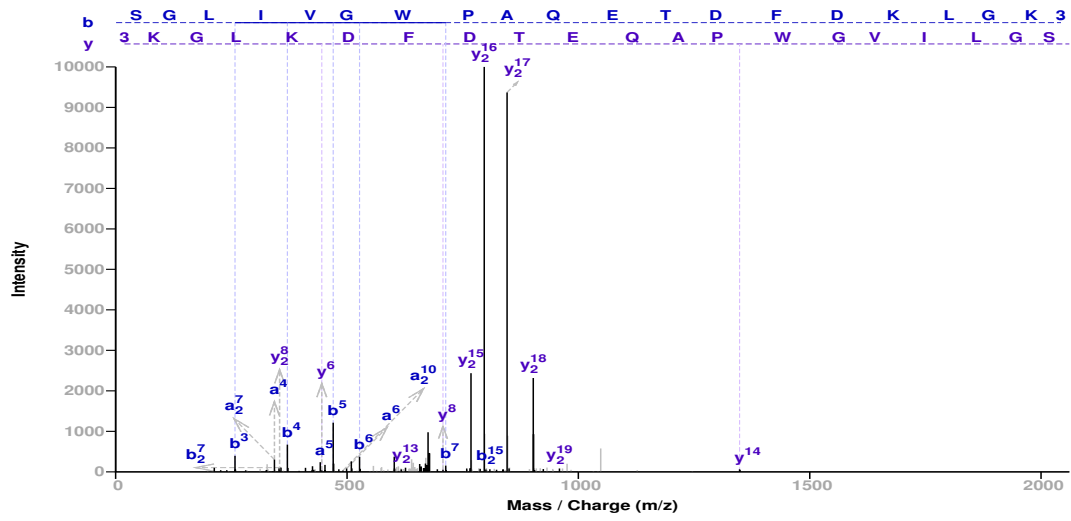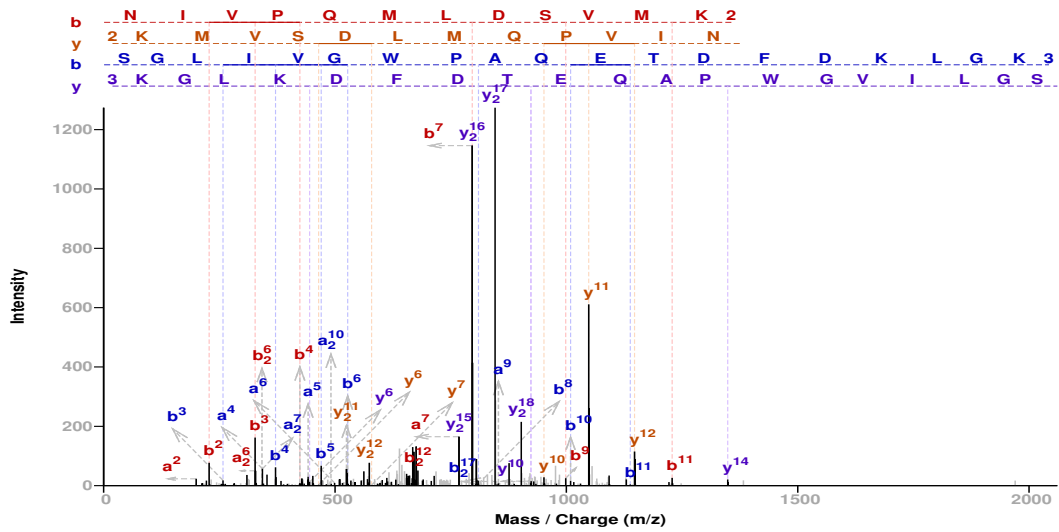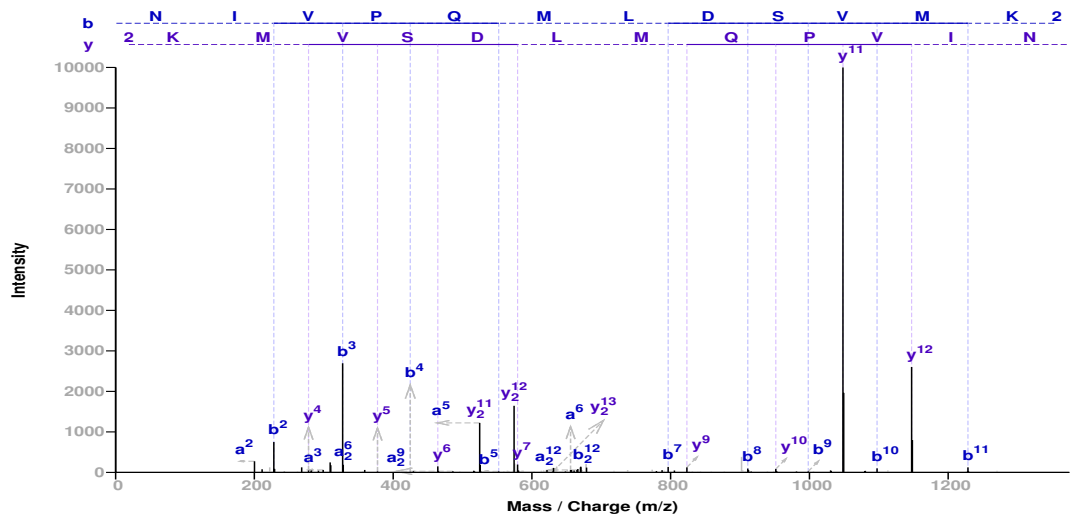

yeast0\_Scan\_Number\_6776 Precursor m/z: 598.878 cosine: 0.833  $\alpha$ : 0.349

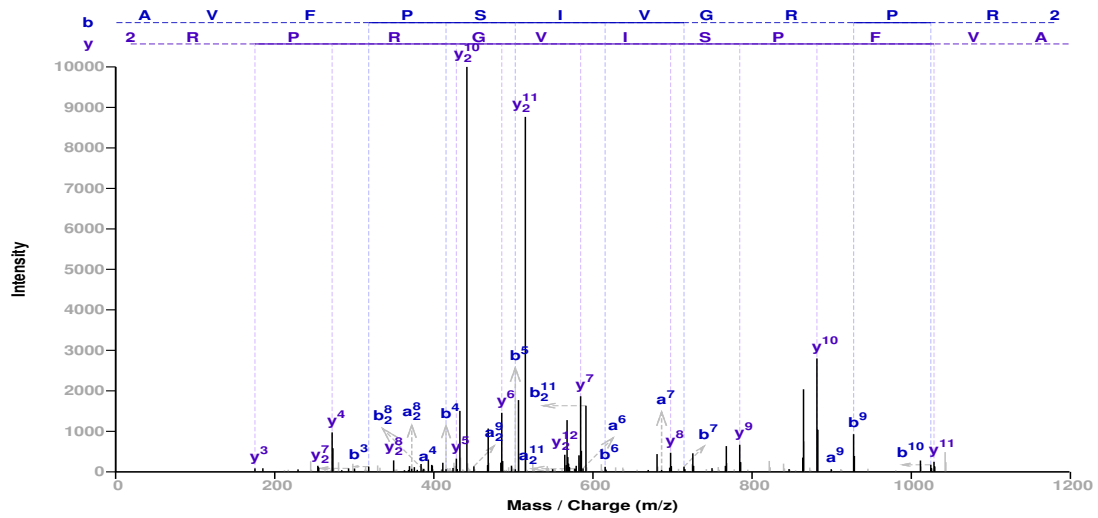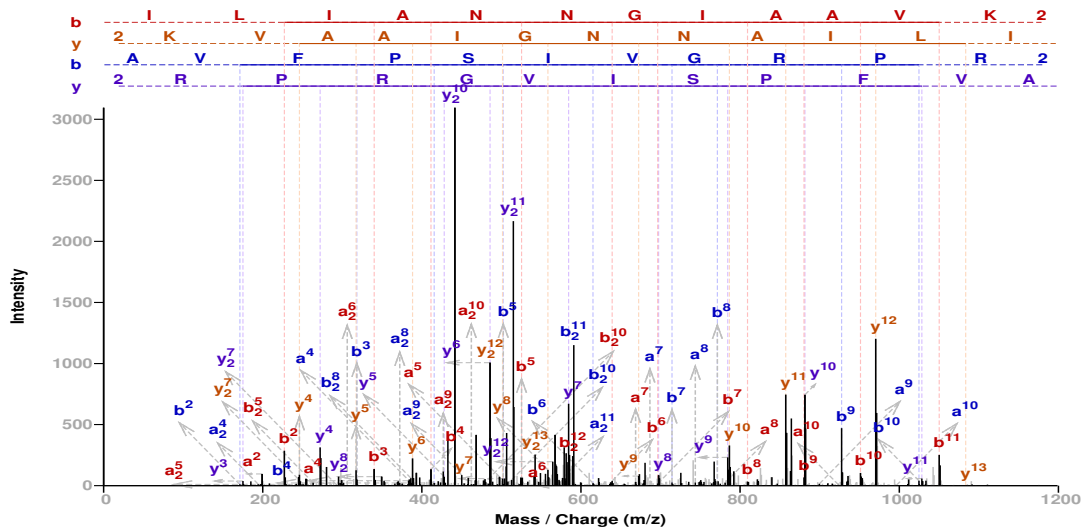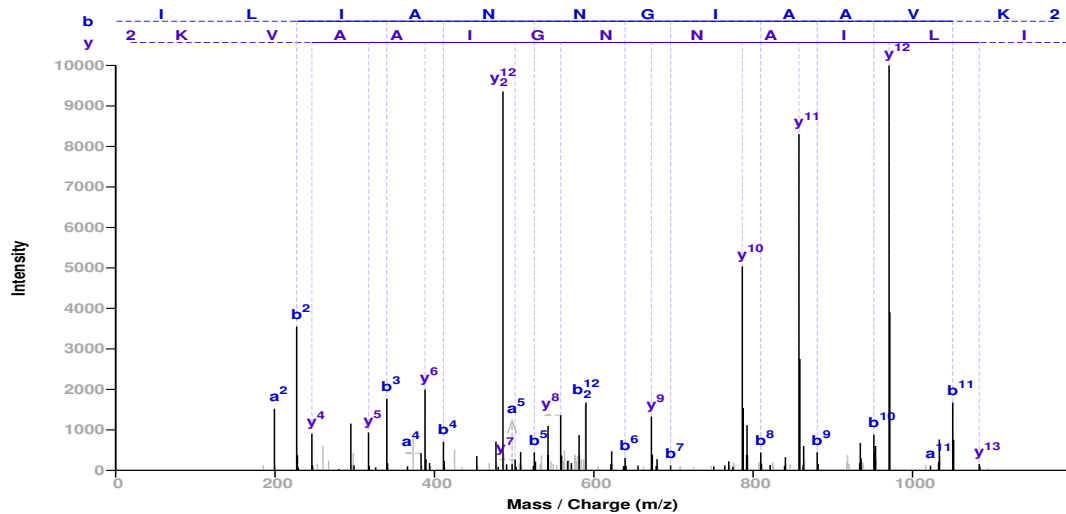





yeast0\_Scan\_Number\_9279 Precursor m/z: 644.699 cosine: 0.738  $\alpha$ : 0.344

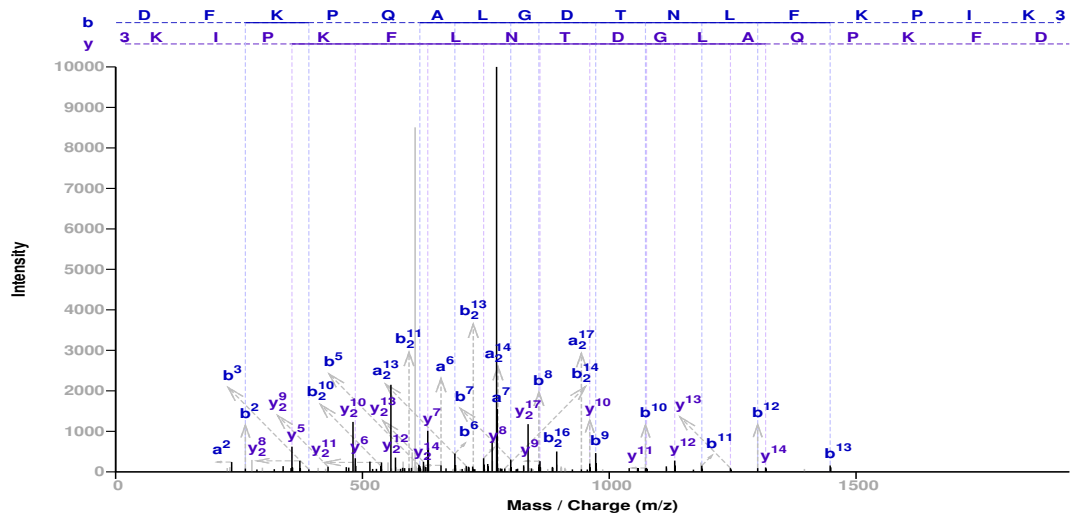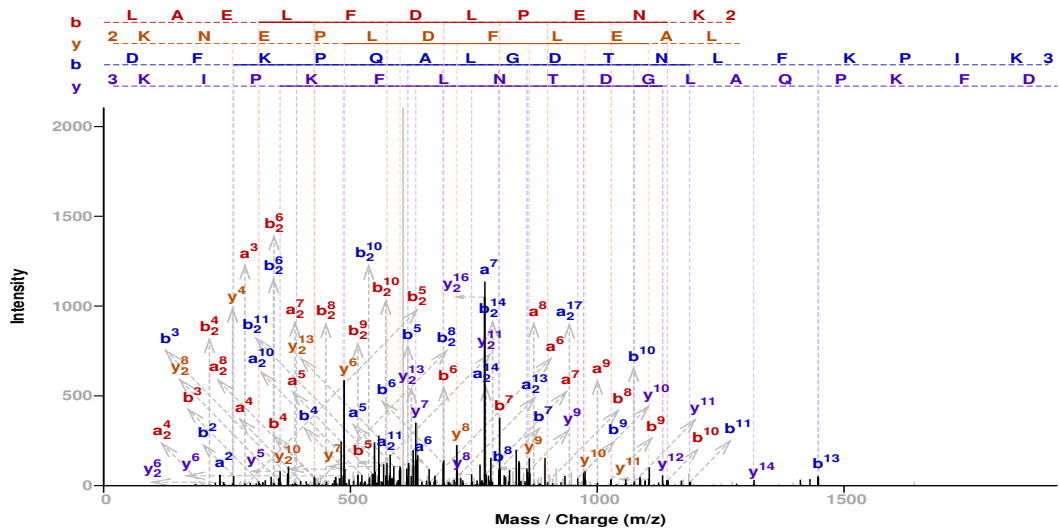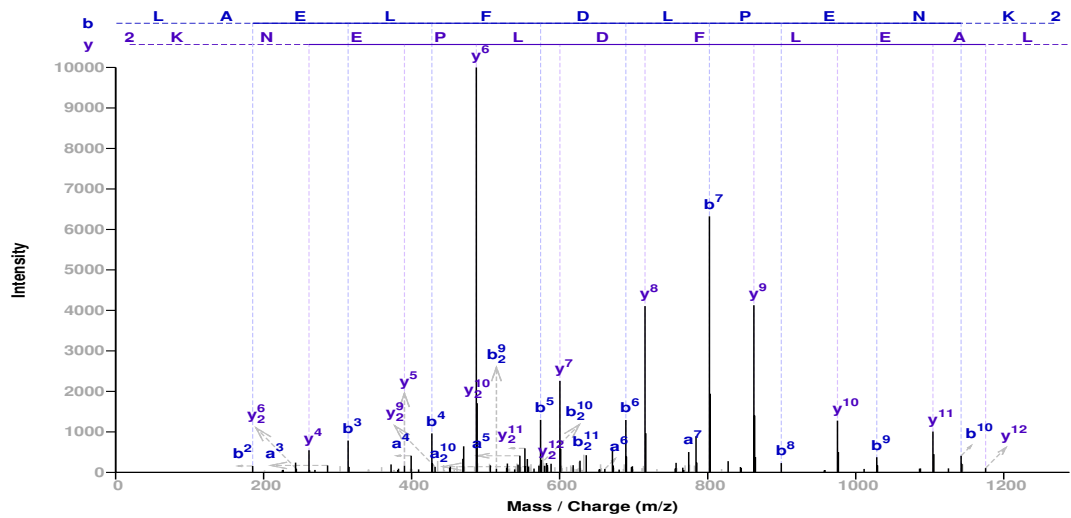

yeast0\_Scan\_Number\_6660 Precursor m/z: 596.298 cosine: 0.830  $\alpha$ : 0.341

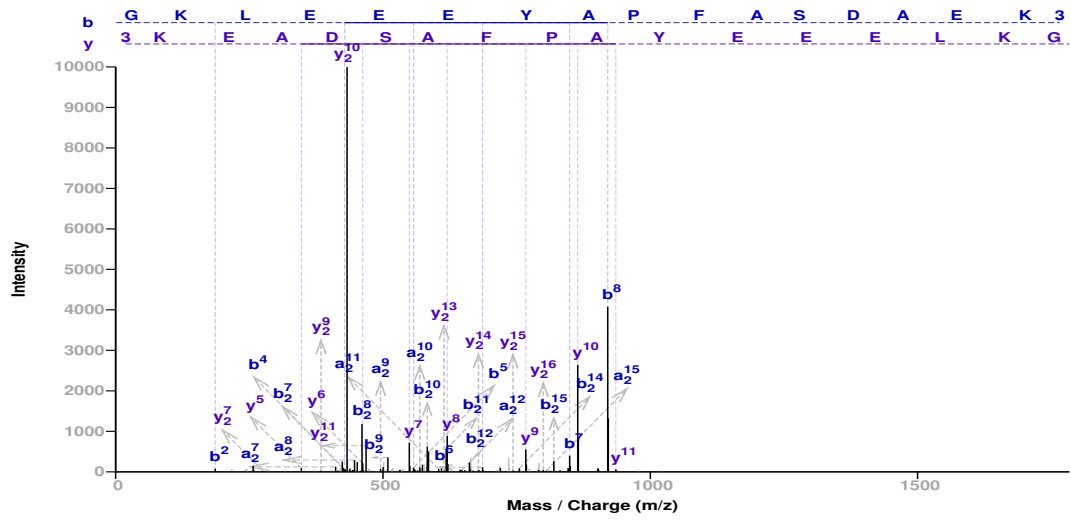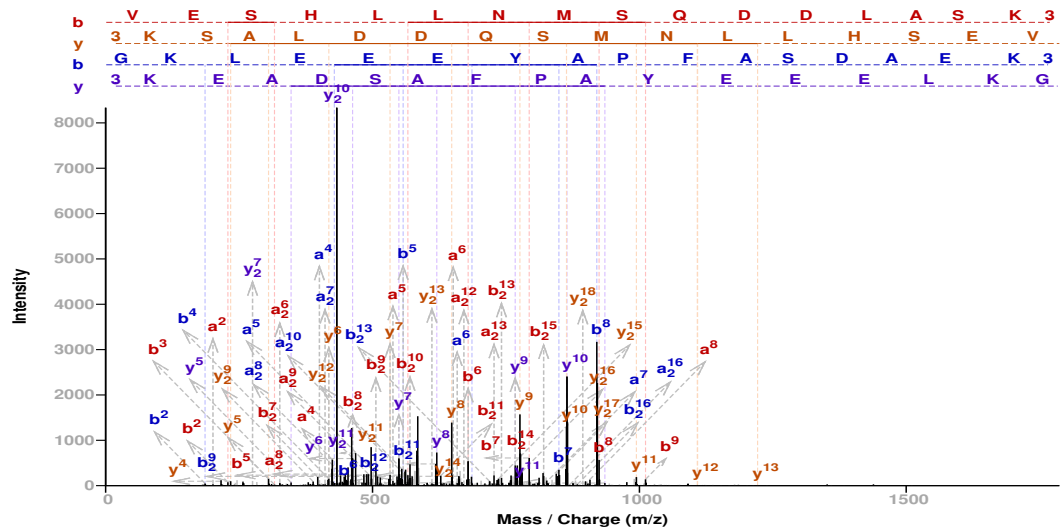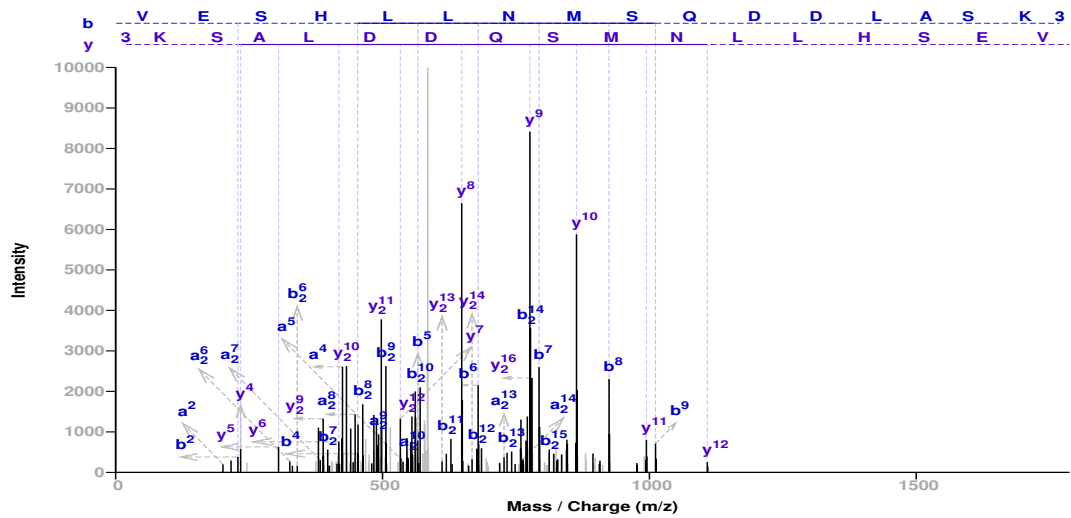



yeast0\_Scan\_Number\_6307 Precursor m/z: 443.267 cosine: 0.793  $\alpha$ : 0.337

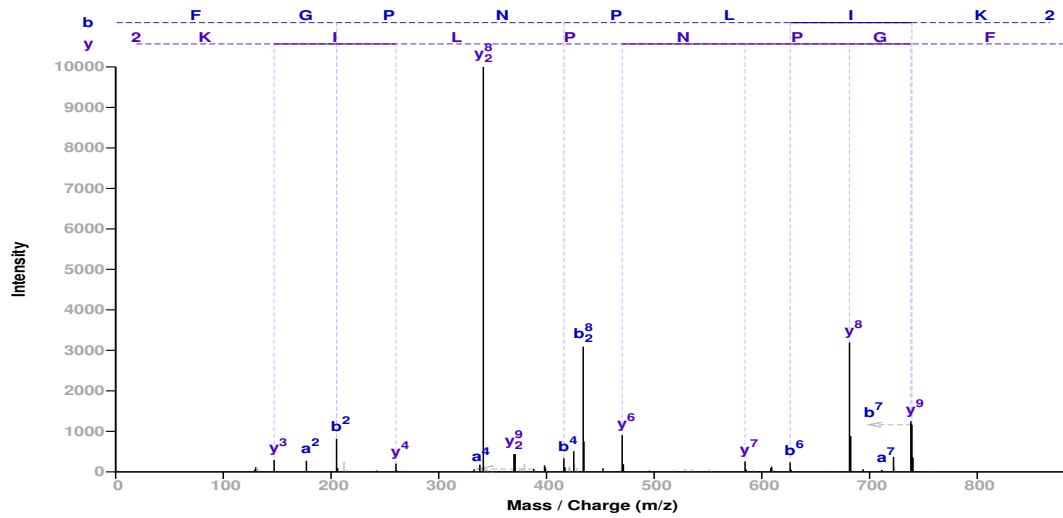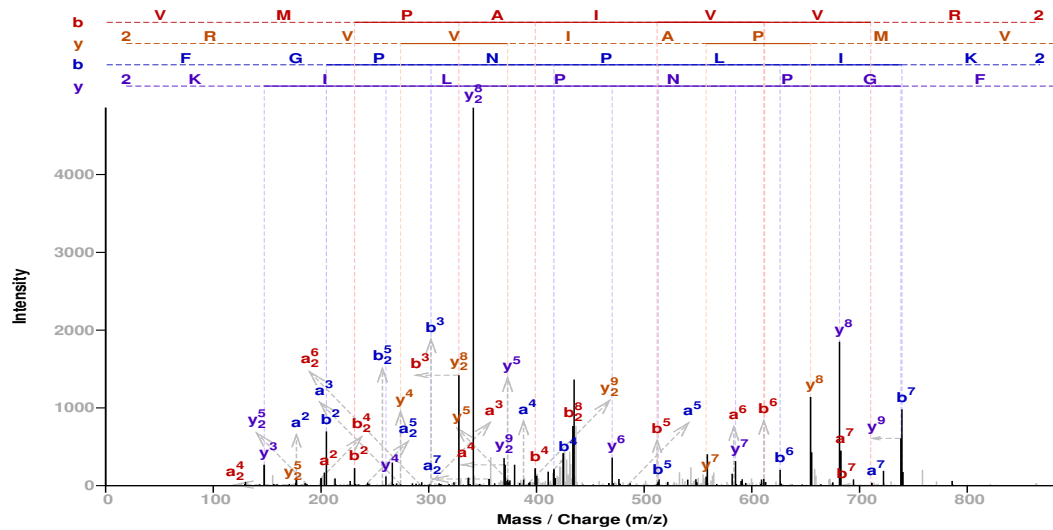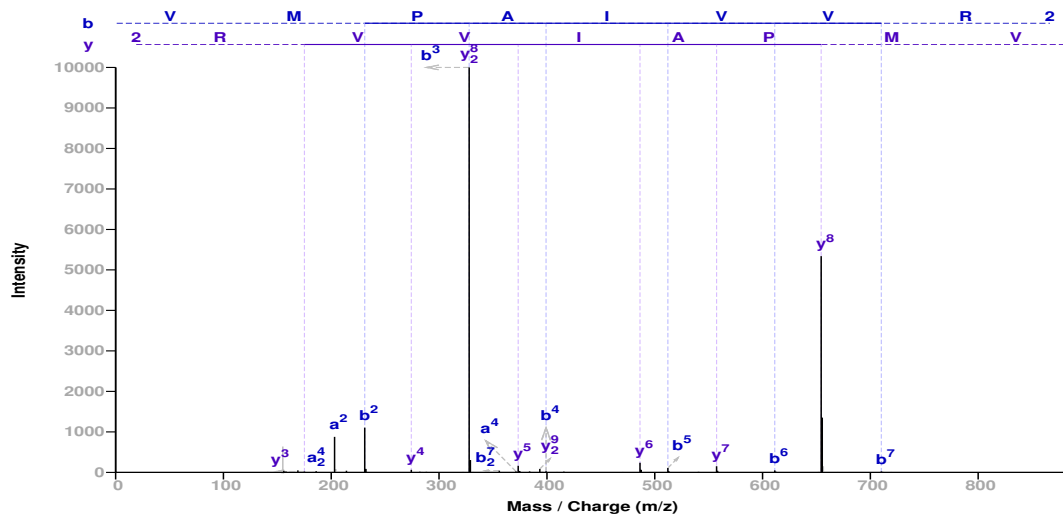

yeast0\_Scan\_Number\_1396 Precursor m/z: 400.882 cosine: 0.785  $\alpha$ : 0.337

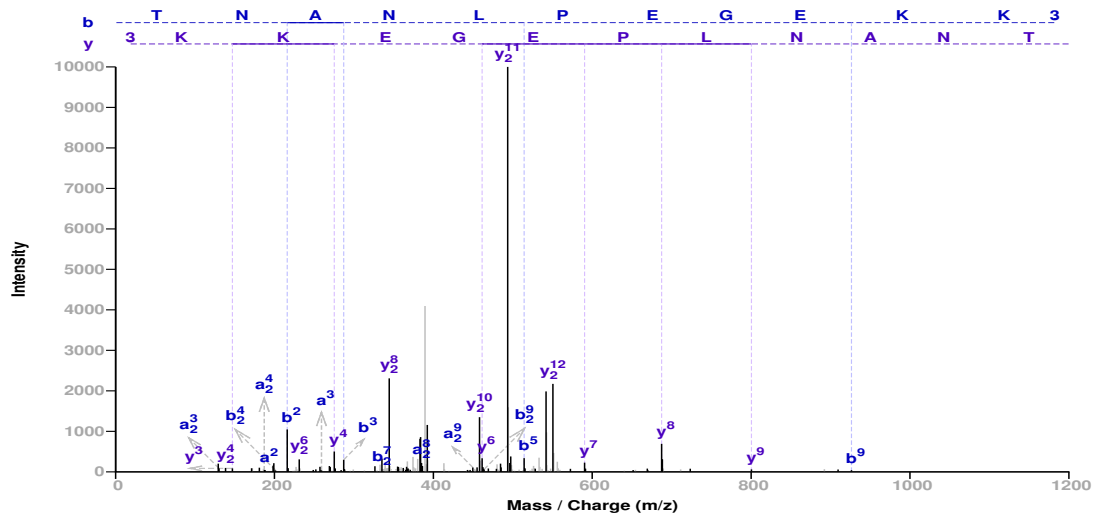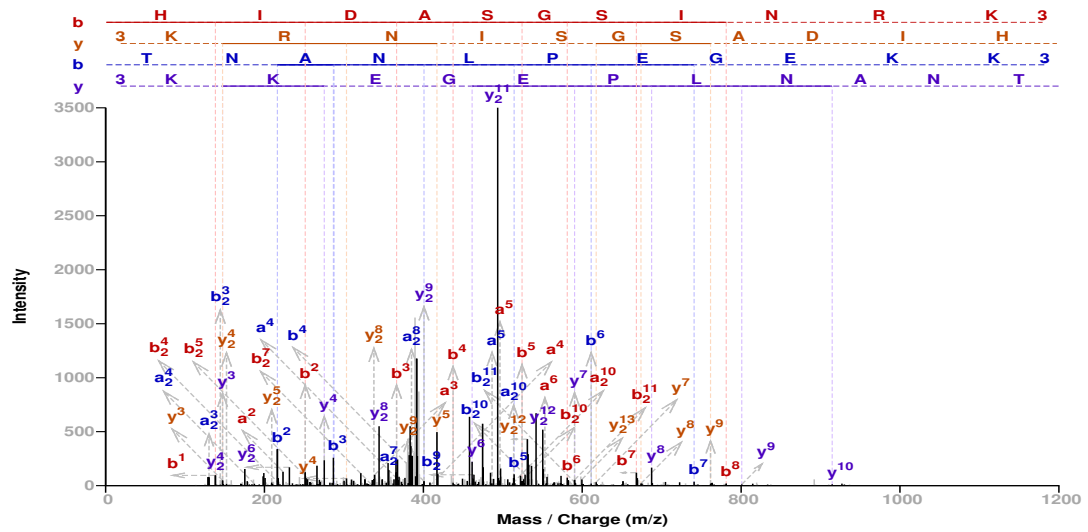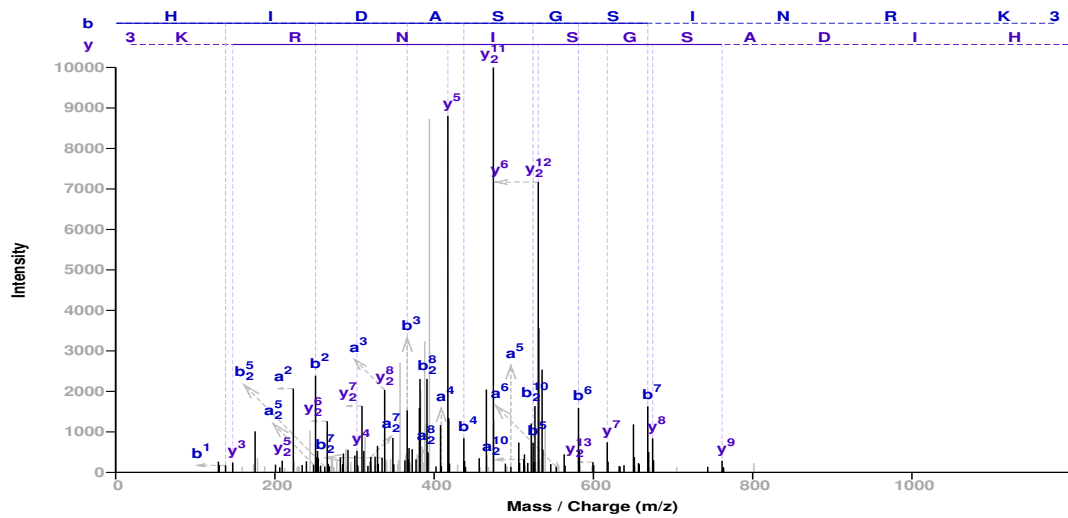



yeast0.Scan\_Number\_10710 Precursor m/z: 789.912 cosine: 0.829  $\alpha$ : 0.332

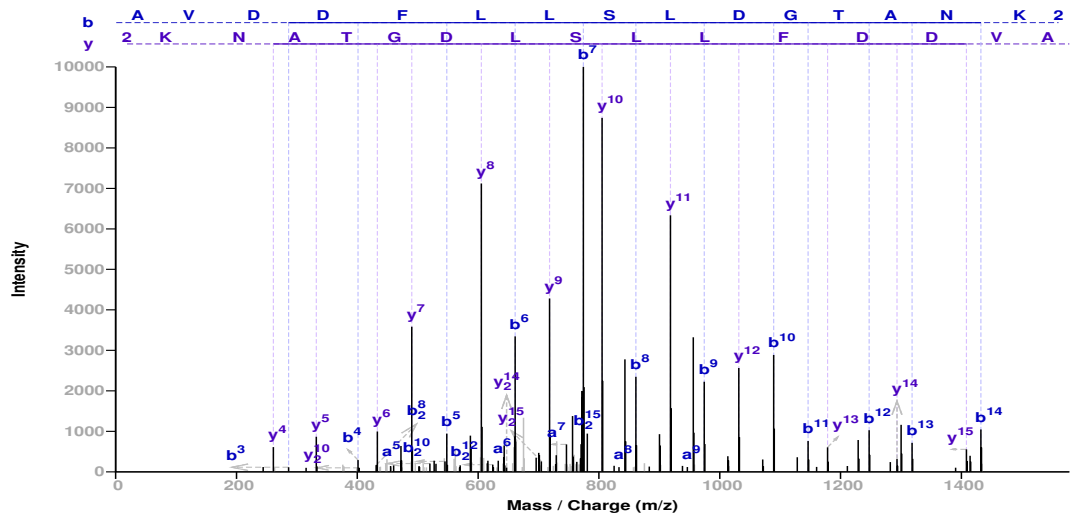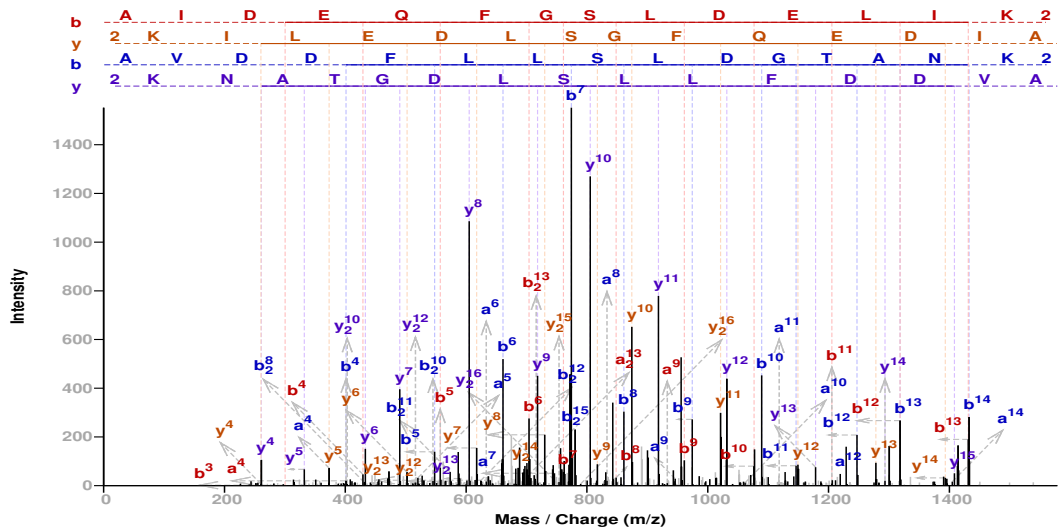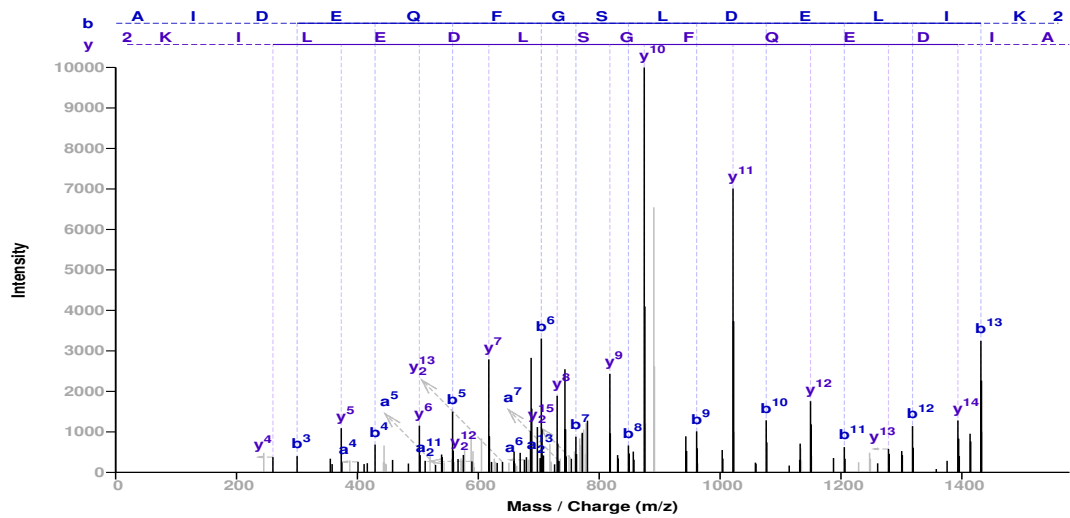



yeast0\_Scan\_Number\_8406 Precursor m/z: 740.385 cosine: 0.784  $\alpha$ : 0.331

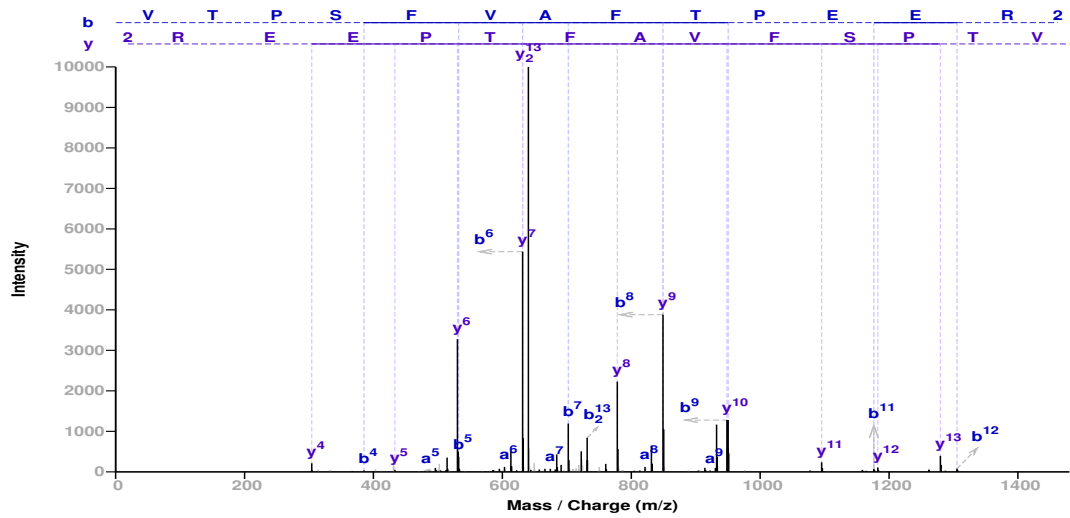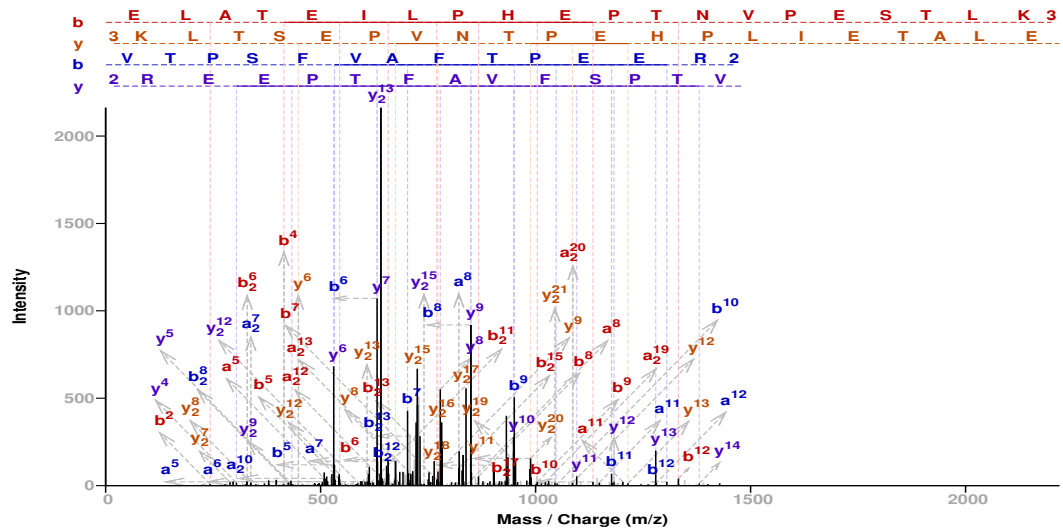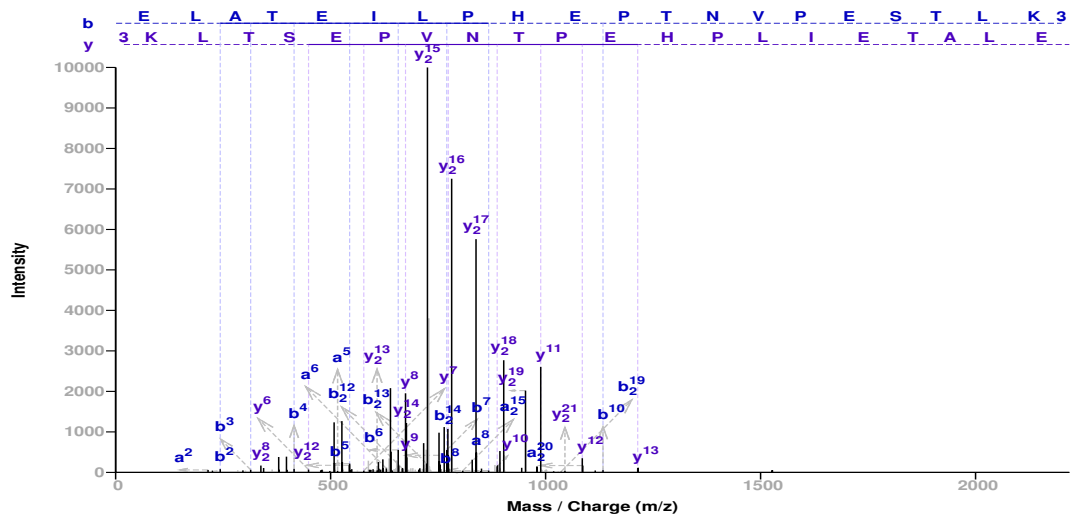

yeast0.Scan\_Number\_6598 Precursor m/z: 471.292 cosine: 0.875  $\alpha$ : 0.331

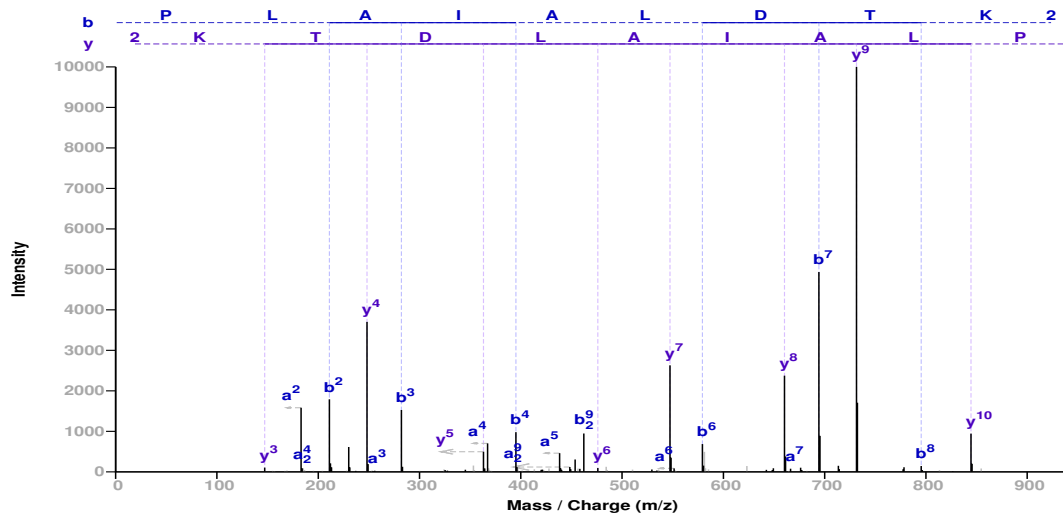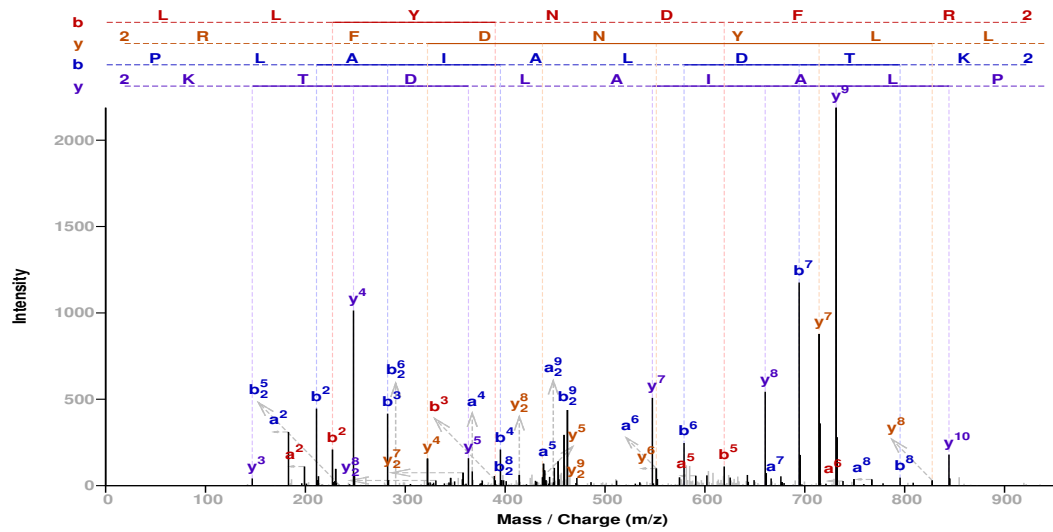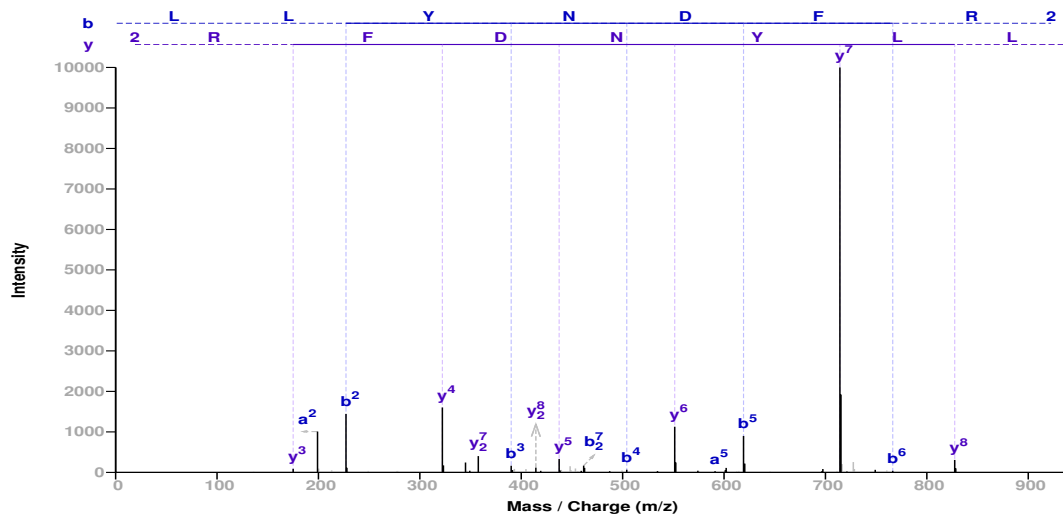

yeast0.Scan\_Number\_3010 Precursor m/z: 362.552 cosine: 0.741  $\alpha$ : 0.329

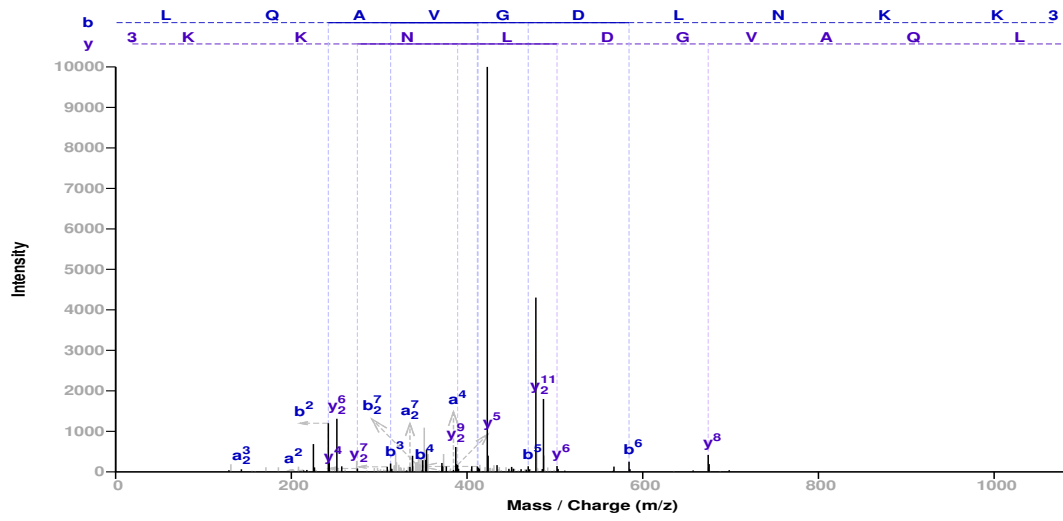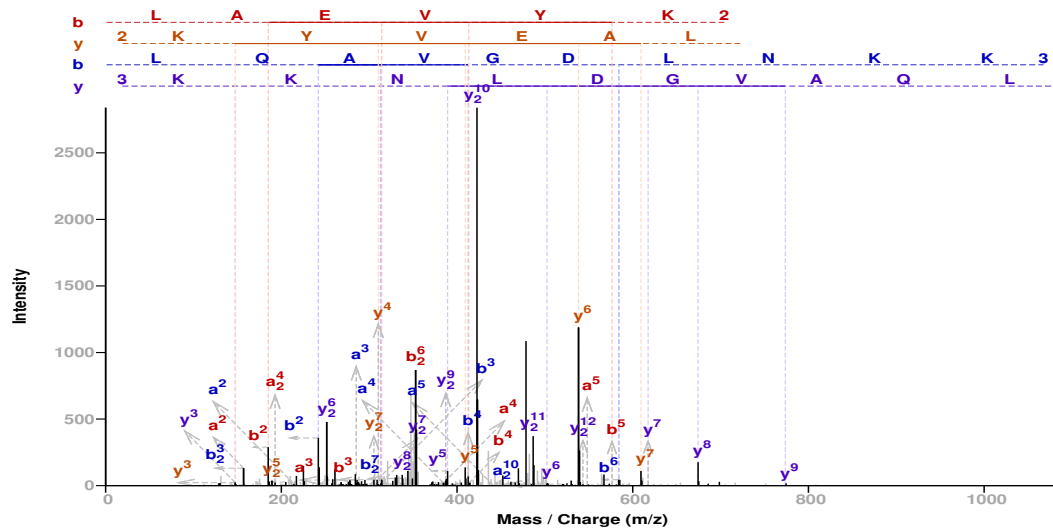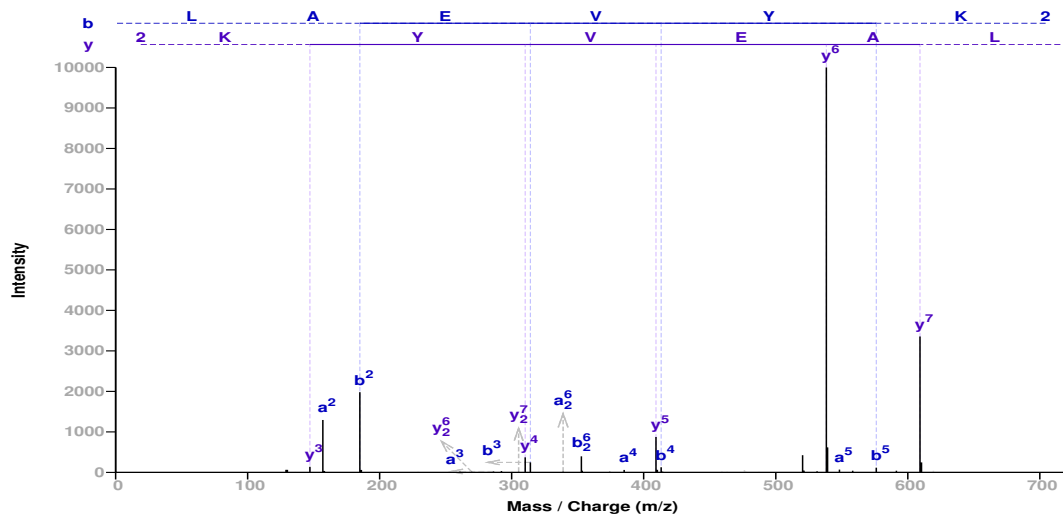

yeast0\_Scan\_Number\_4334 Precursor m/z: 383.220 cosine: 0.779  $\alpha$ : 0.326

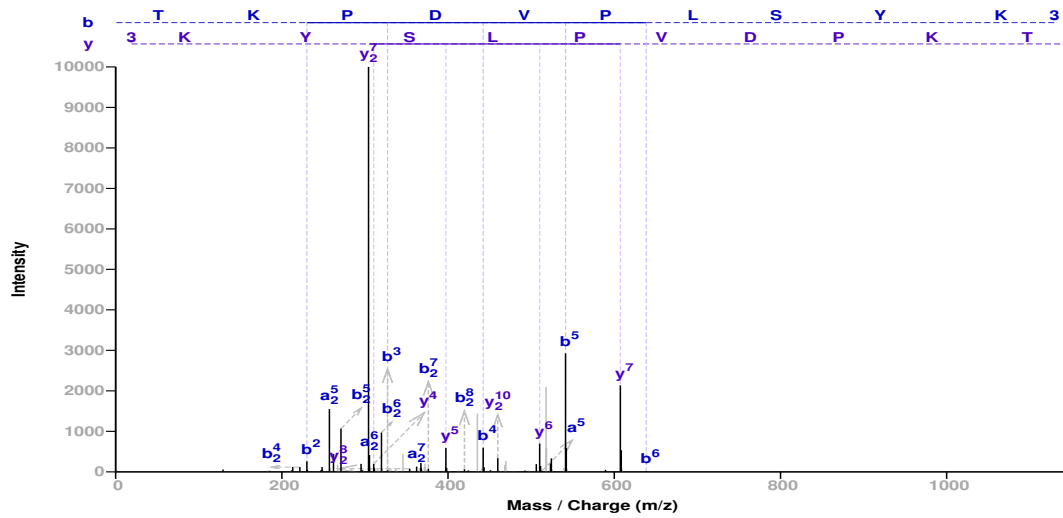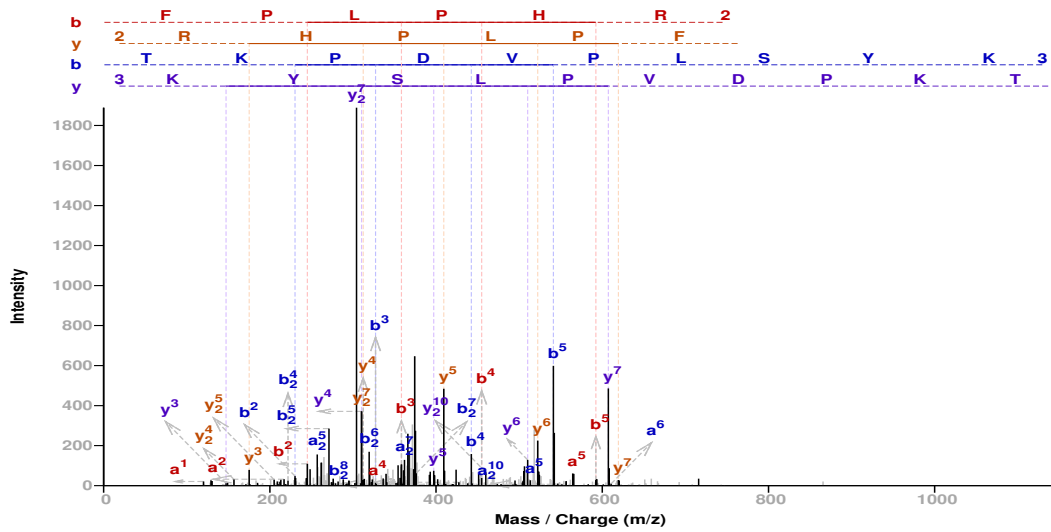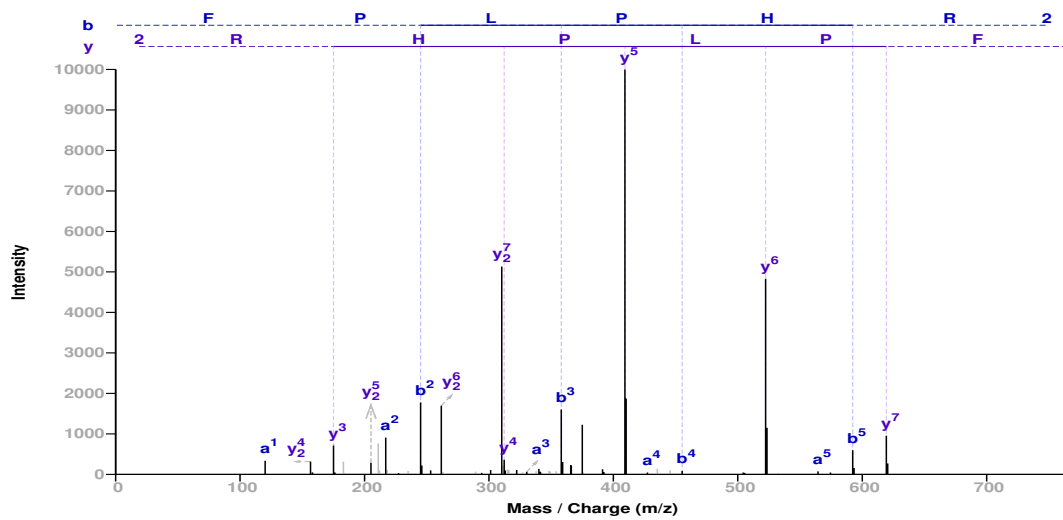

yeast0\_Scan\_Number\_3118 Precursor m/z: 520.262 cosine: 0.846  $\alpha$ : 0.326

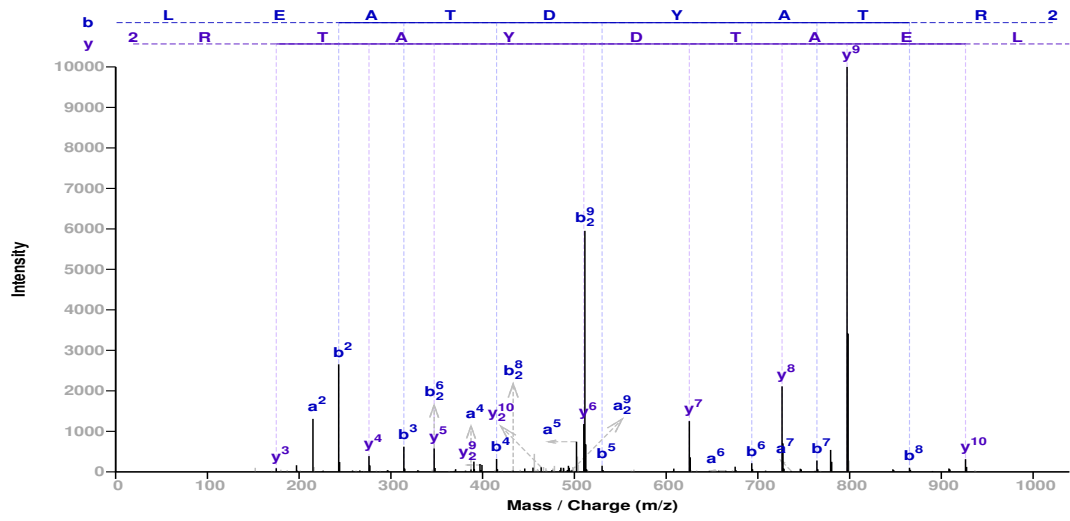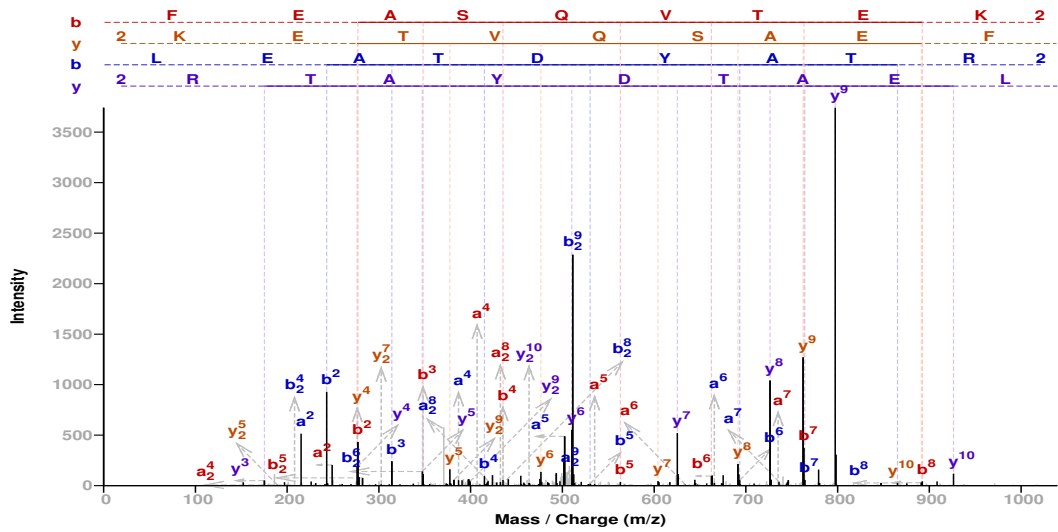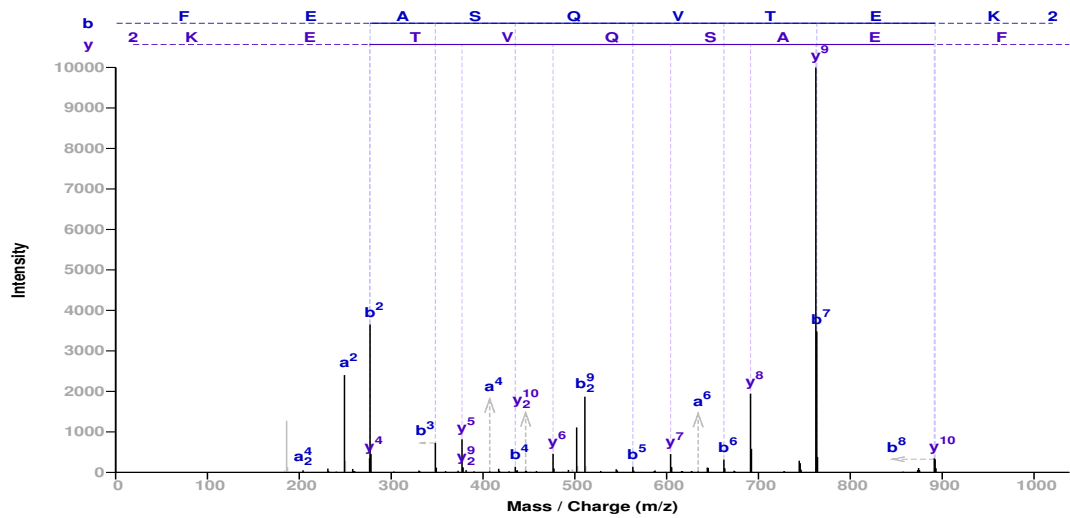

yeast0\_Scan\_Number\_4065 Precursor m/z: 493.292 cosine: 0.825  $\alpha$ : 0.318

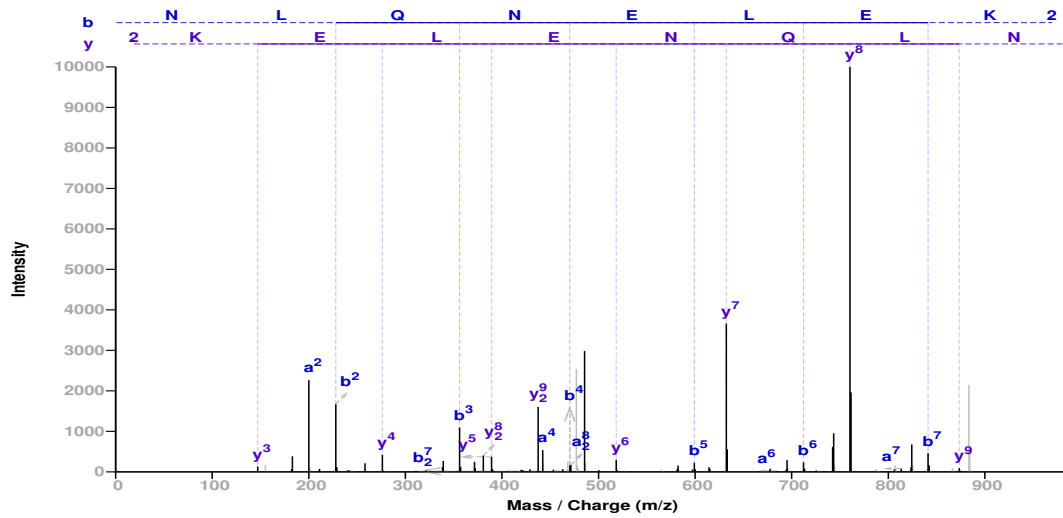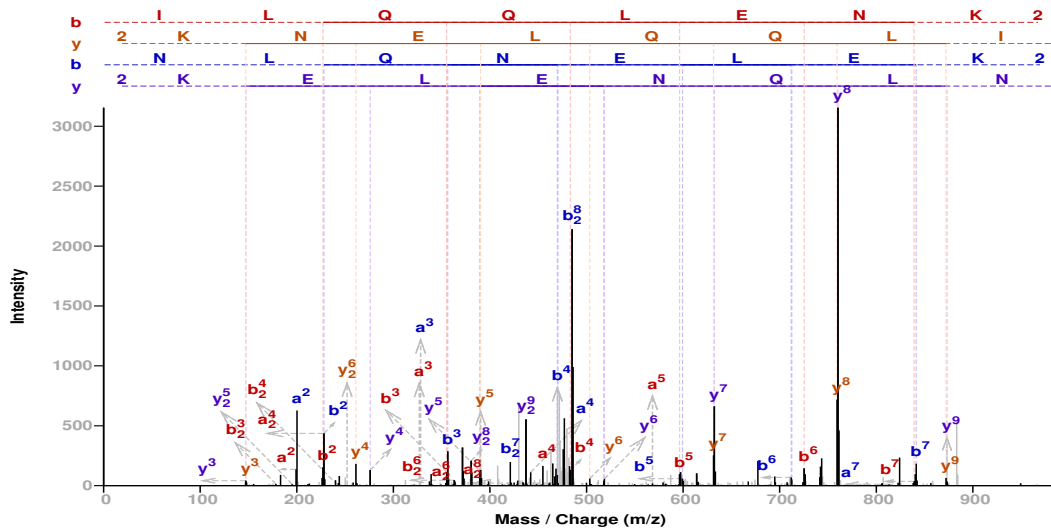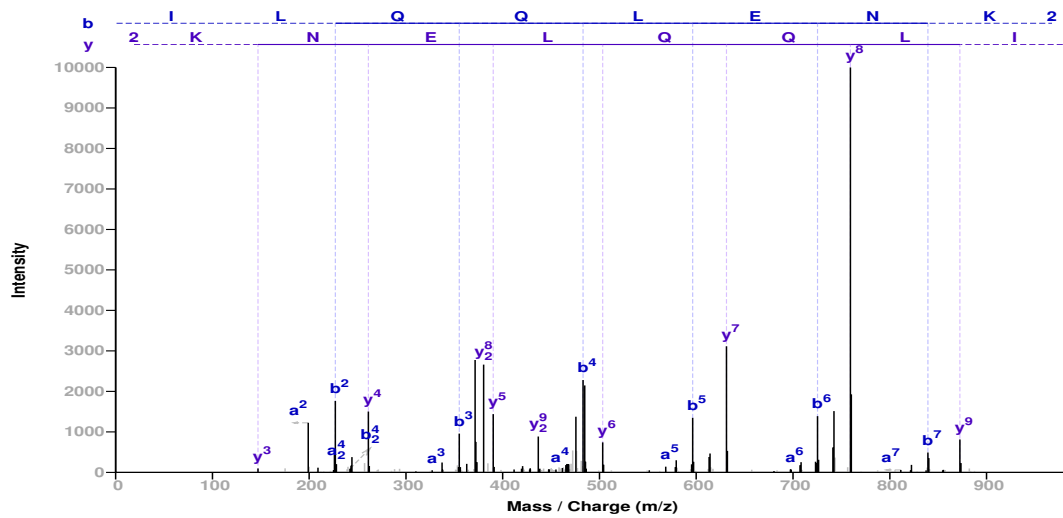

yeast0.Scan\_Number\_4365 Precursor m/z: 401.227 cosine: 0.781  $\alpha$ : 0.314

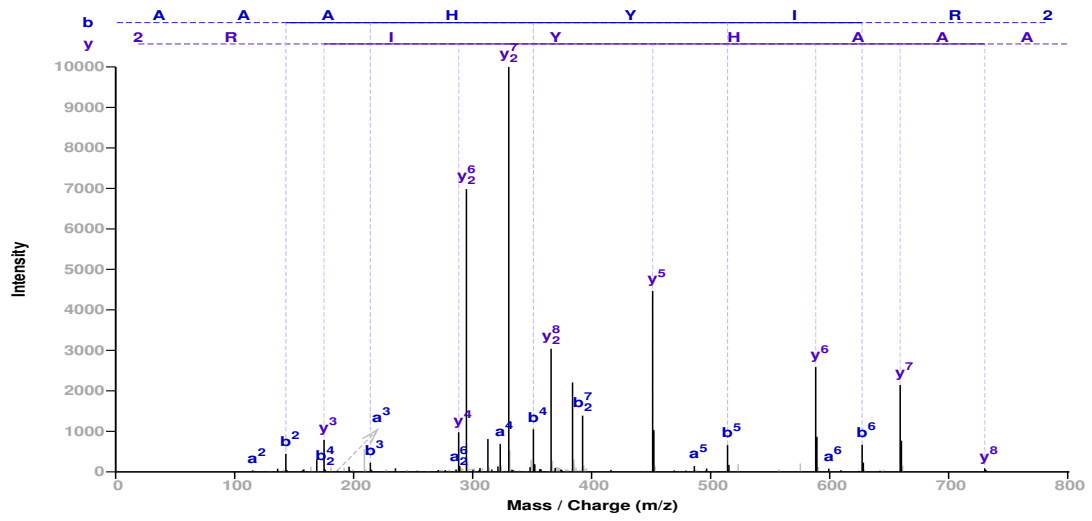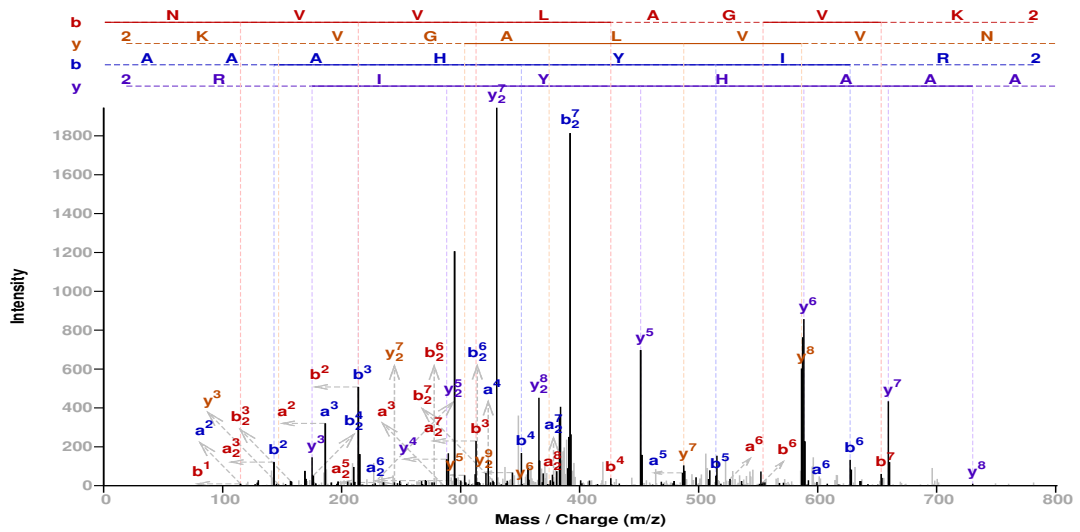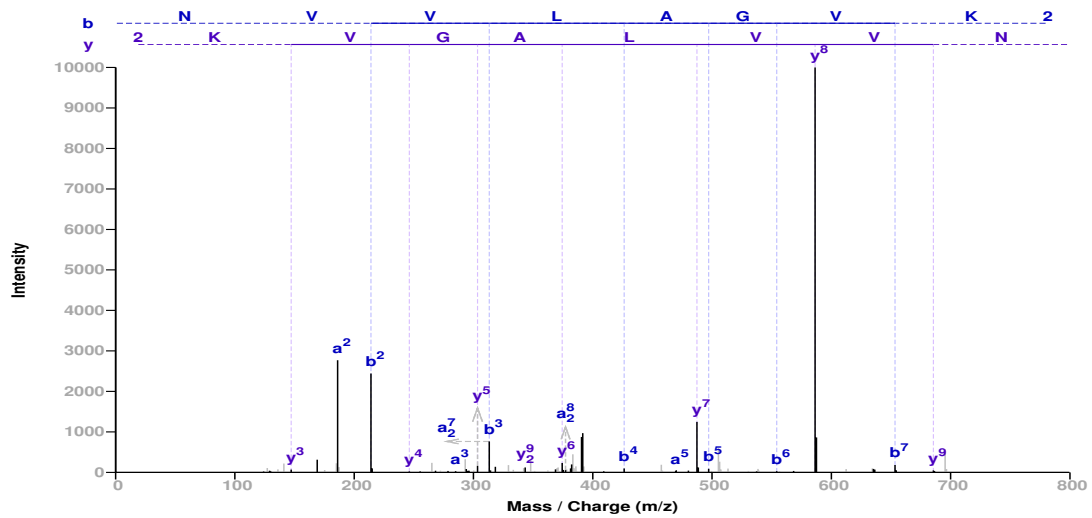

yeast0.Scan\_Number\_6380 Precursor m/z: 373.905 cosine: 0.783  $\alpha$ : 0.311

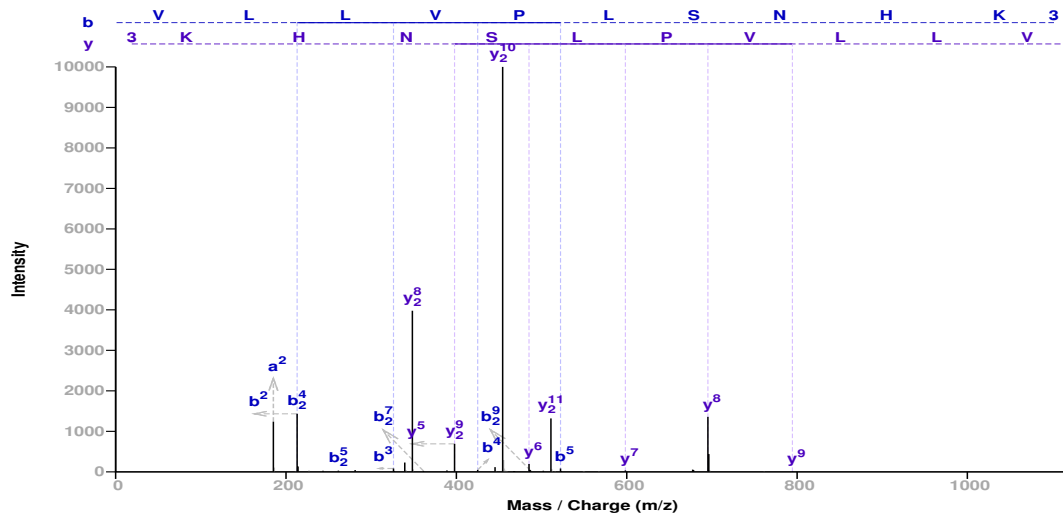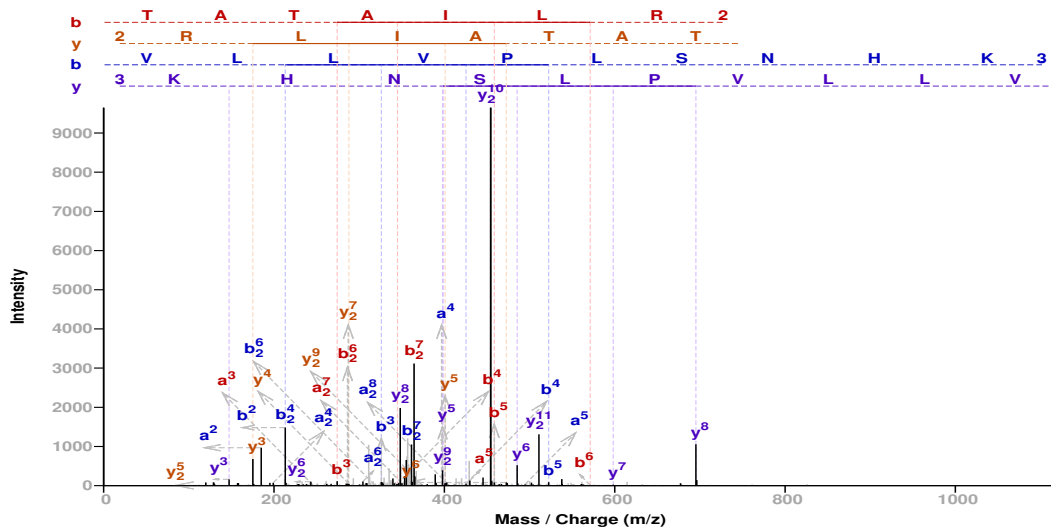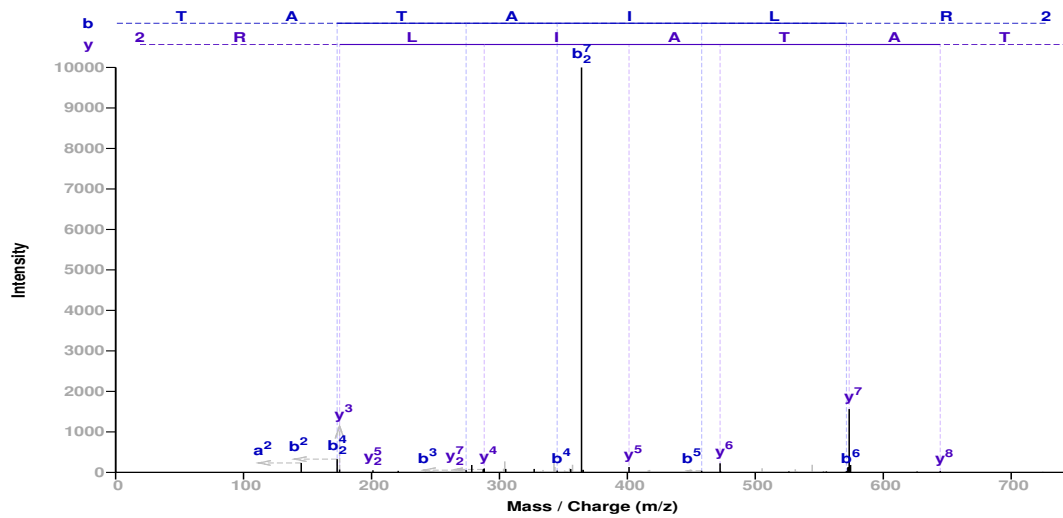



yeast0.Scan\_Number\_5585 Precursor m/z: 538.304 cosine: 0.733  $\alpha$ : 0.311

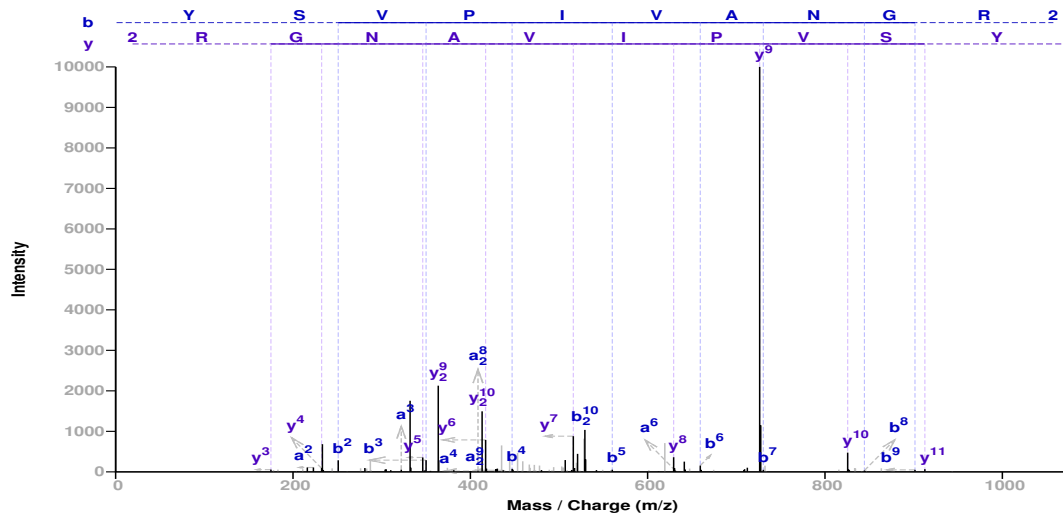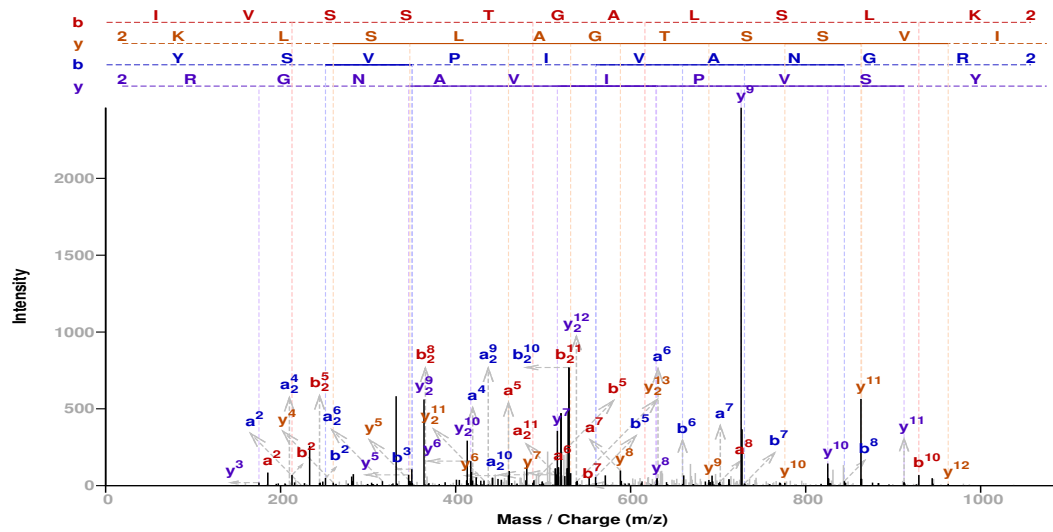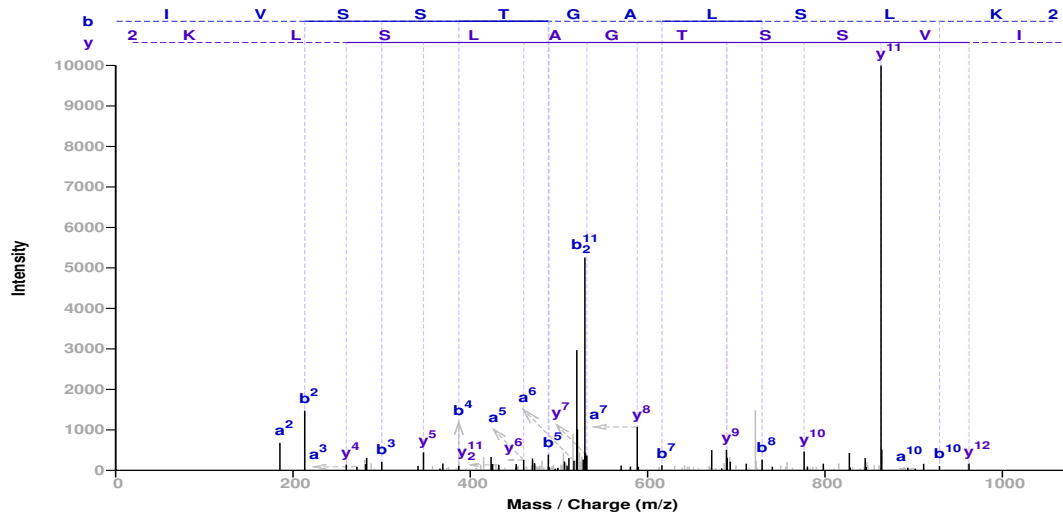

yeast0.Scan\_Number\_4523 Precursor m/z: 468.748 cosine: 0.811  $\alpha$ : 0.310

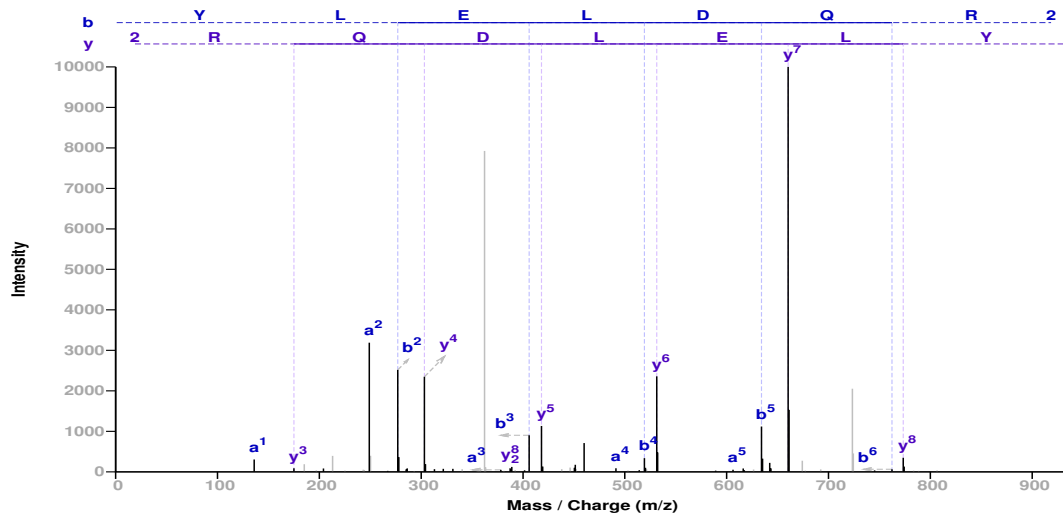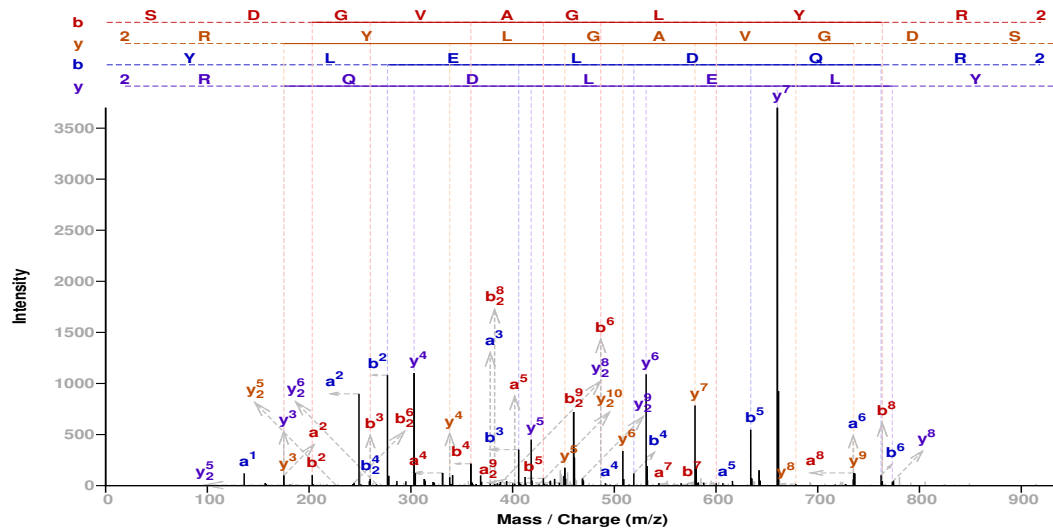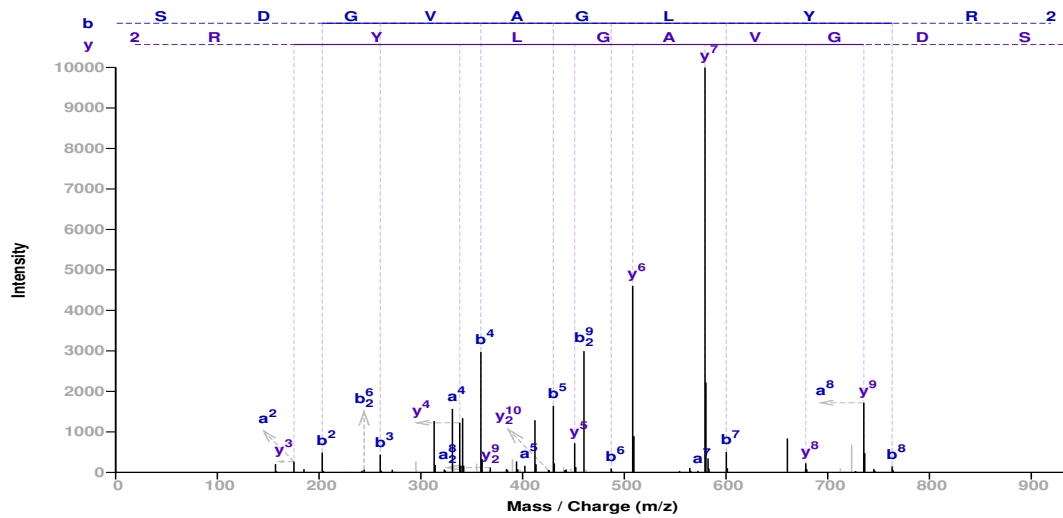

yeast0\_Scan\_Number\_9970 Precursor m/z: 843.969 cosine: 0.731  $\alpha$ : 0.310

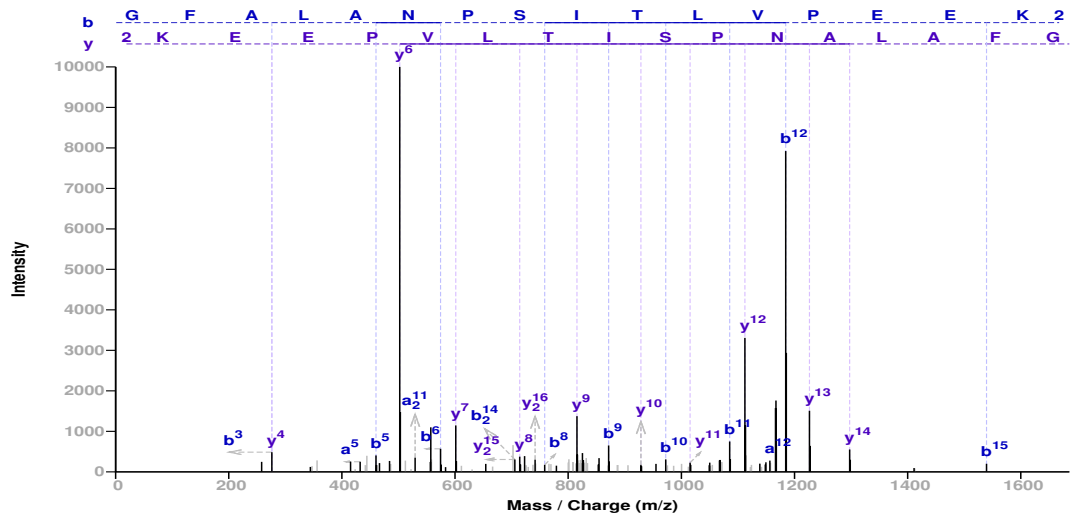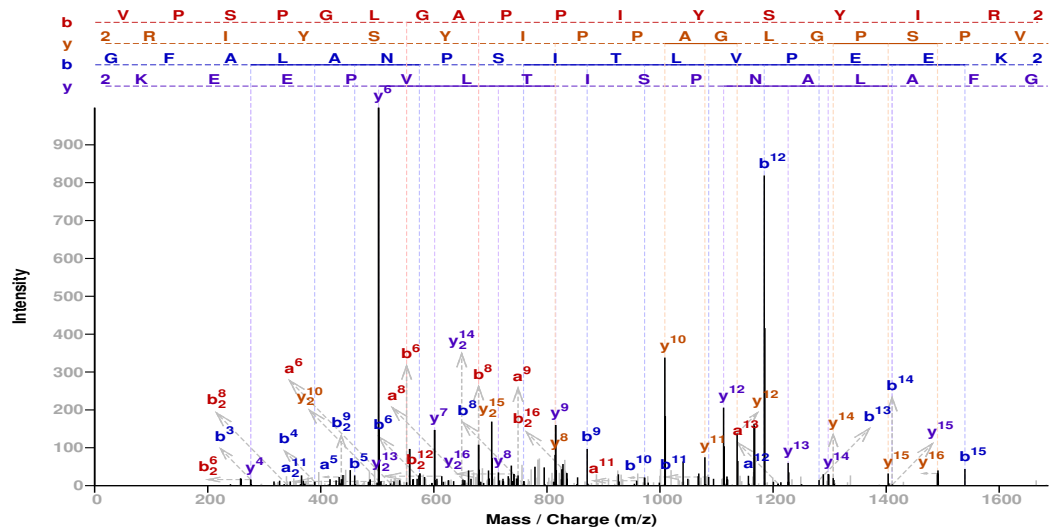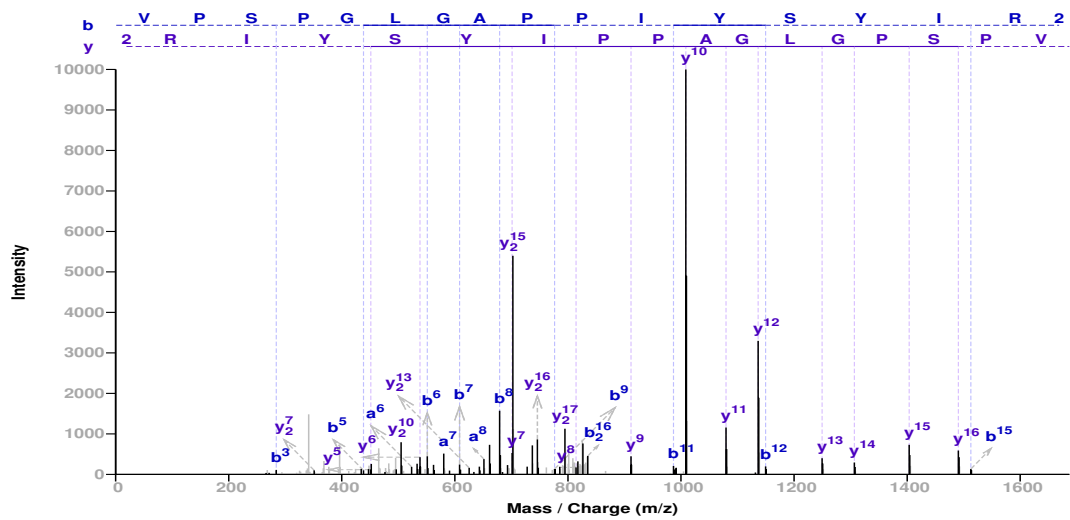

yeast0\_Scan\_Number\_3871 Precursor m/z: 581.268 cosine: 0.896  $\alpha$ : 0.309

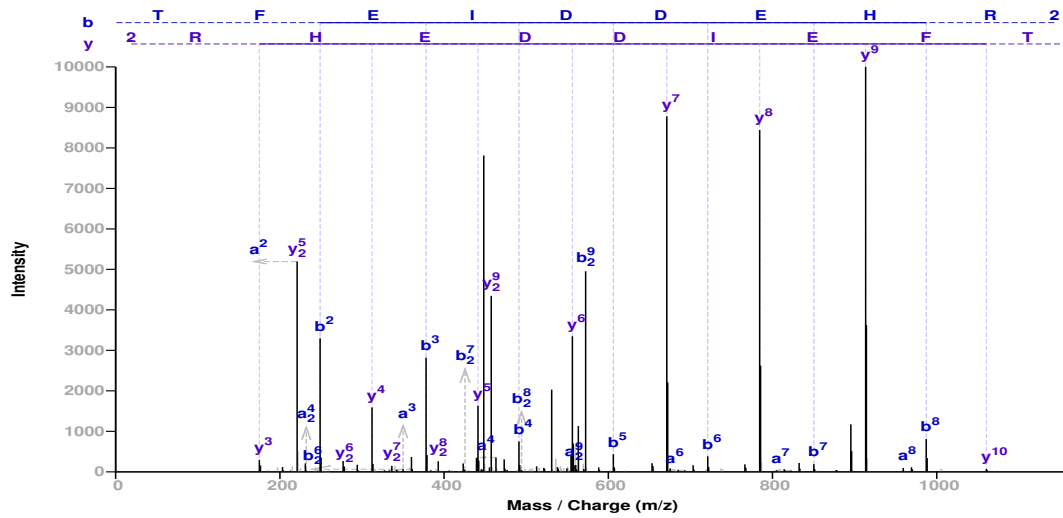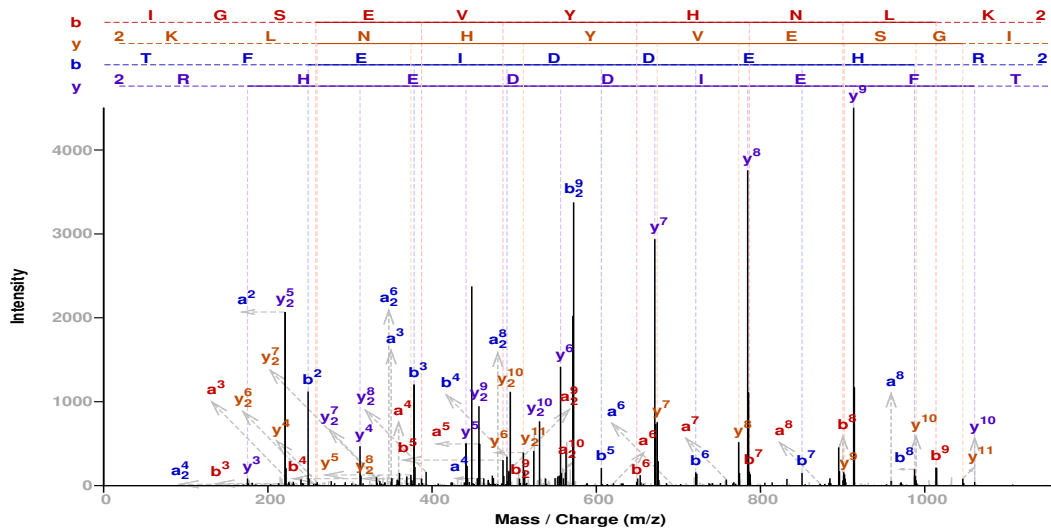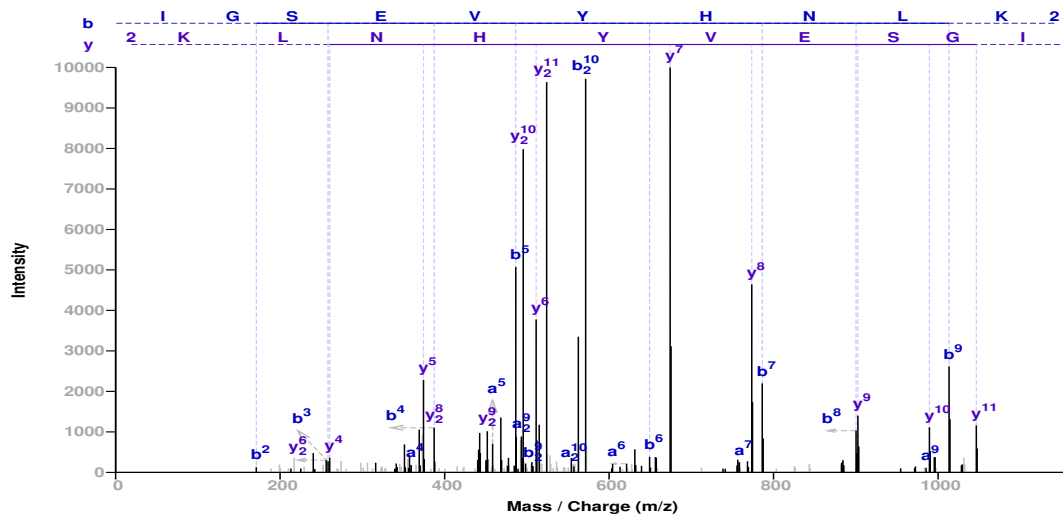

yeast0\_Scan\_Number\_4609 Precursor m/z: 612.807 cosine: 0.751  $\alpha$ : 0.303

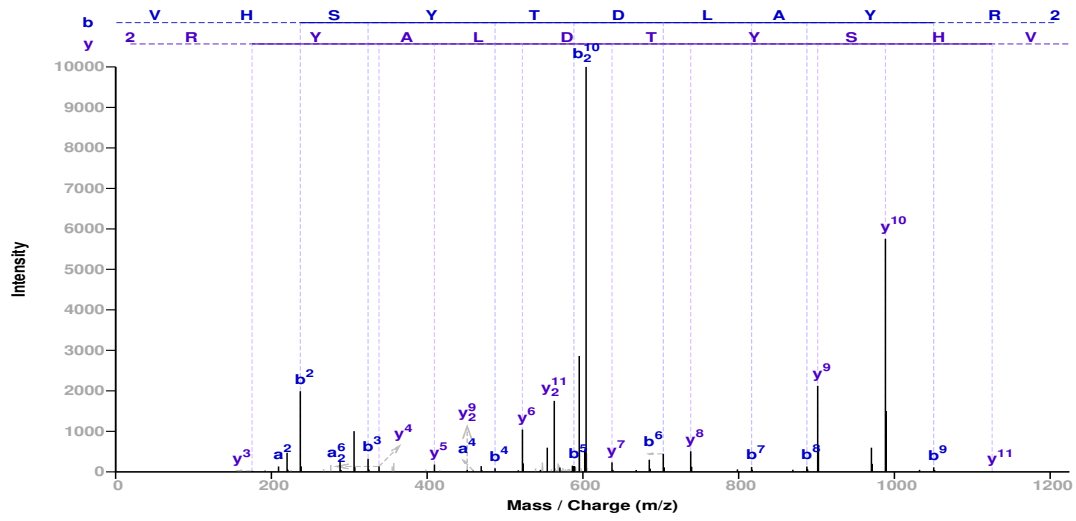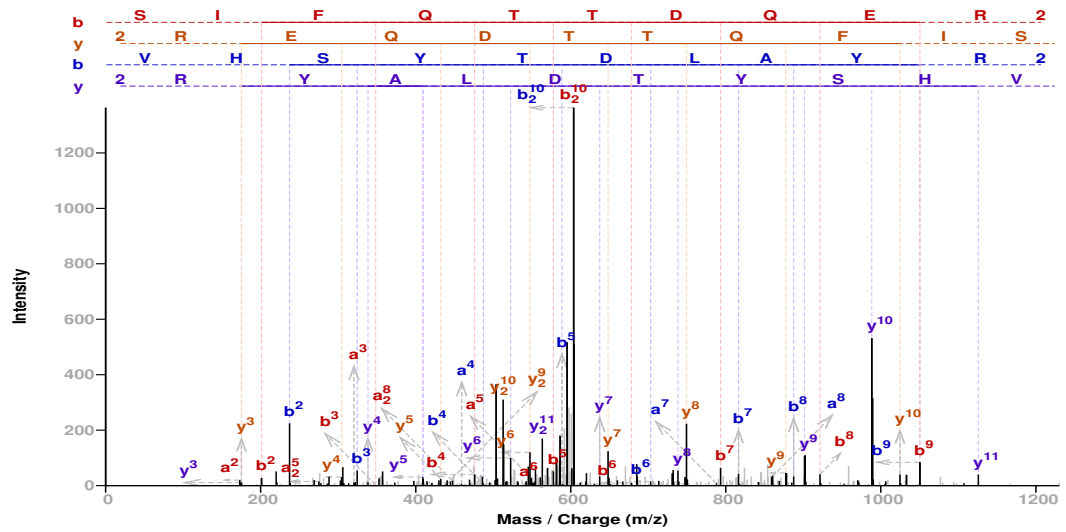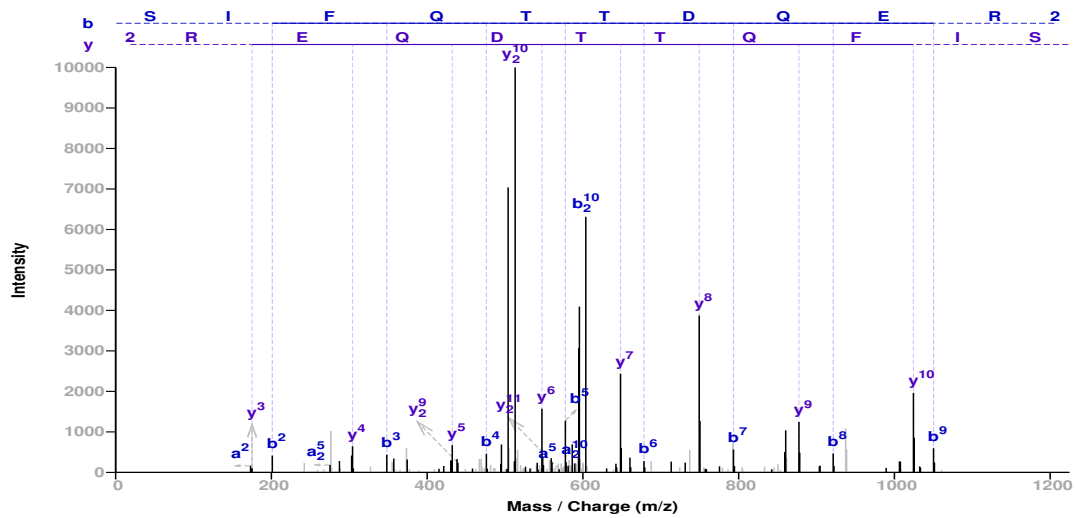

yeast0\_Scan\_Number\_5089 Precursor m/z: 485.792 cosine: 0.878  $\alpha$ : 0.302

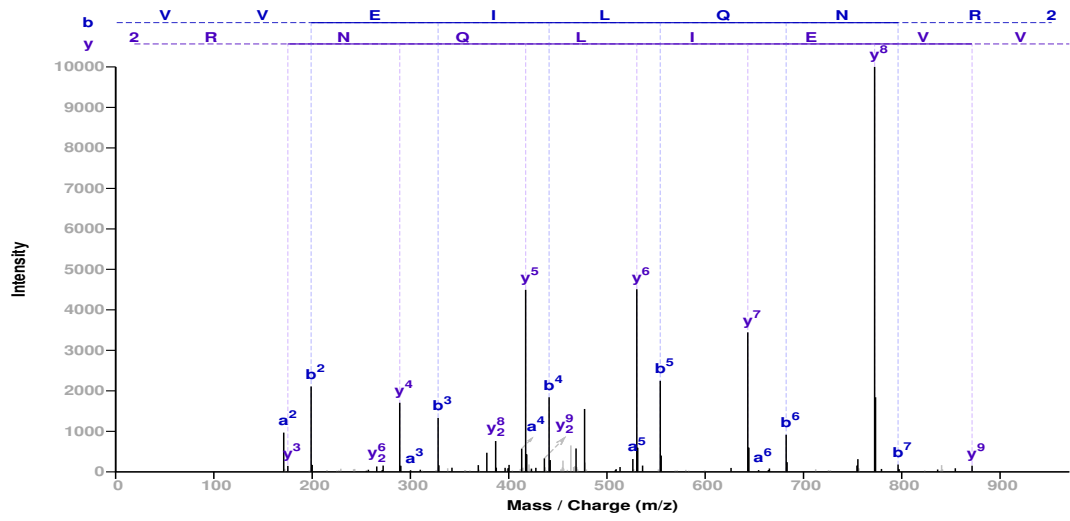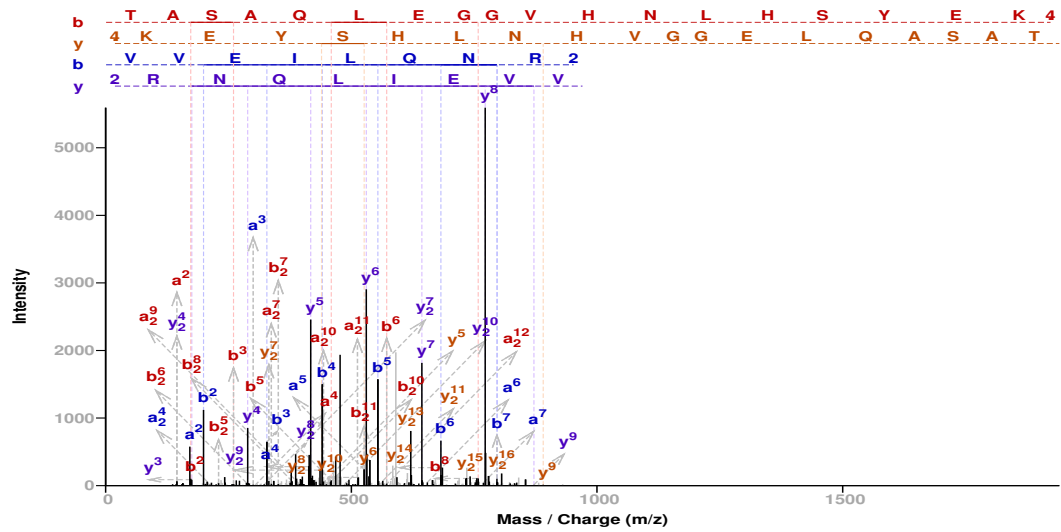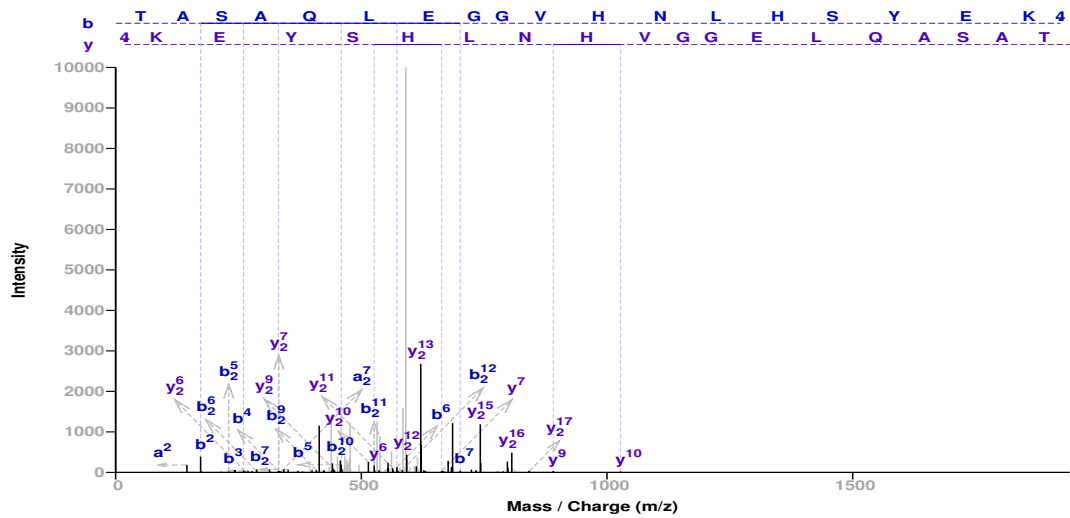

yeast0.Scan\_Number\_3821 Precursor m/z: 563.266 cosine: 0.765  $\alpha$ : 0.301

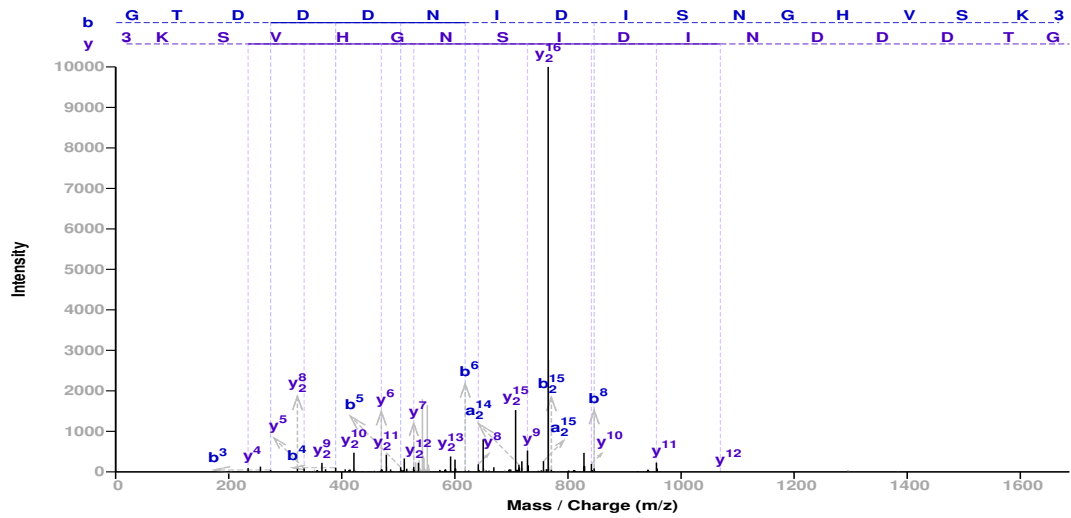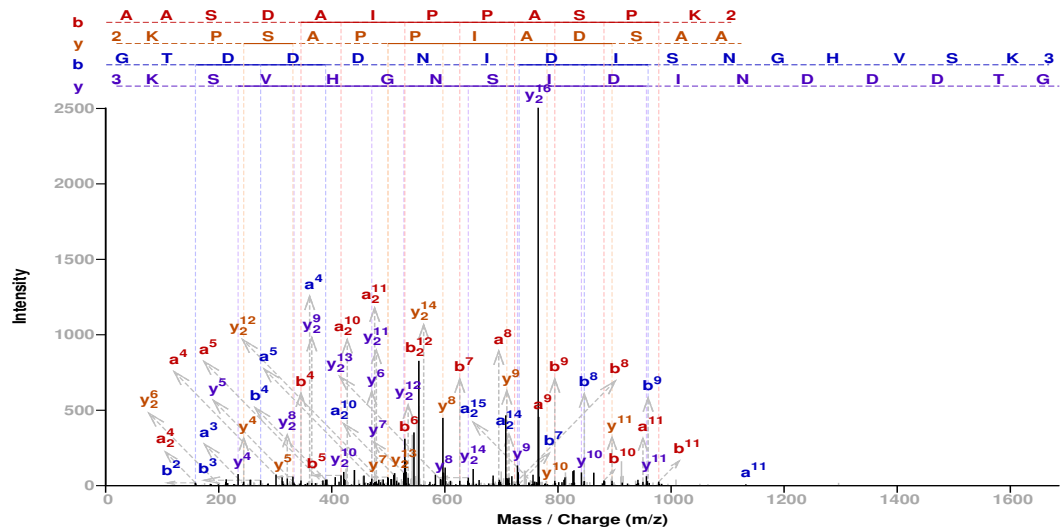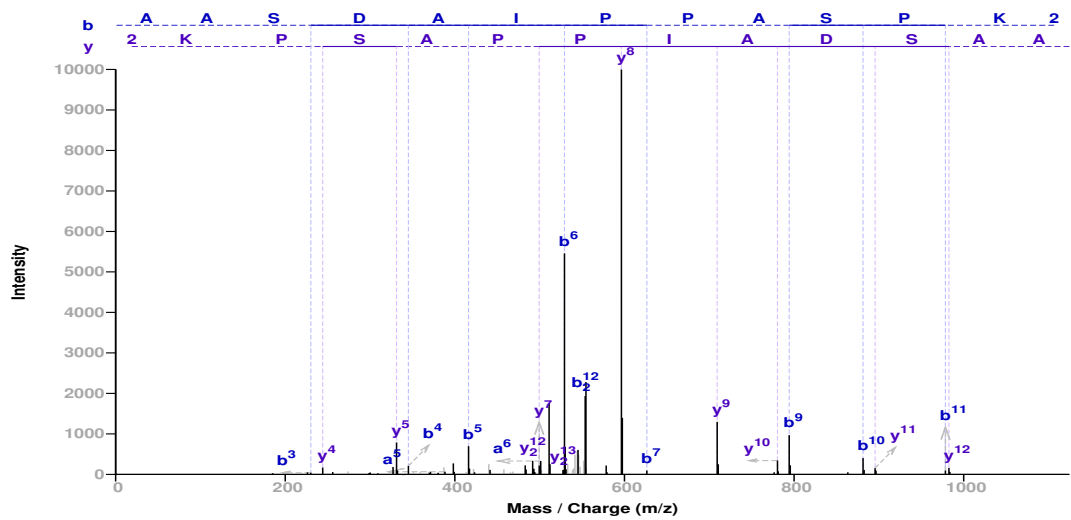

yeast0\_Scan\_Number\_3873 Precursor m/z: 387.848 cosine: 0.949  $\alpha$ : 0.294

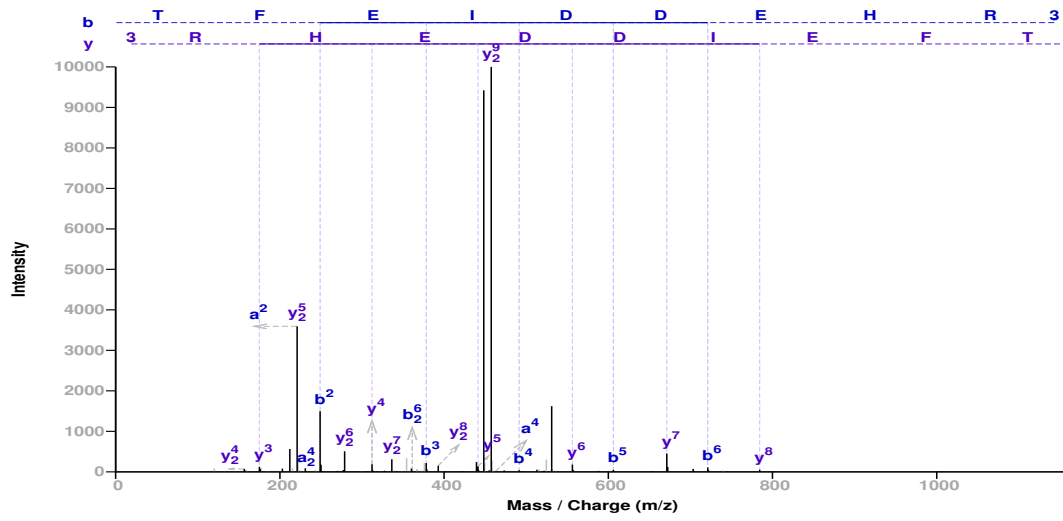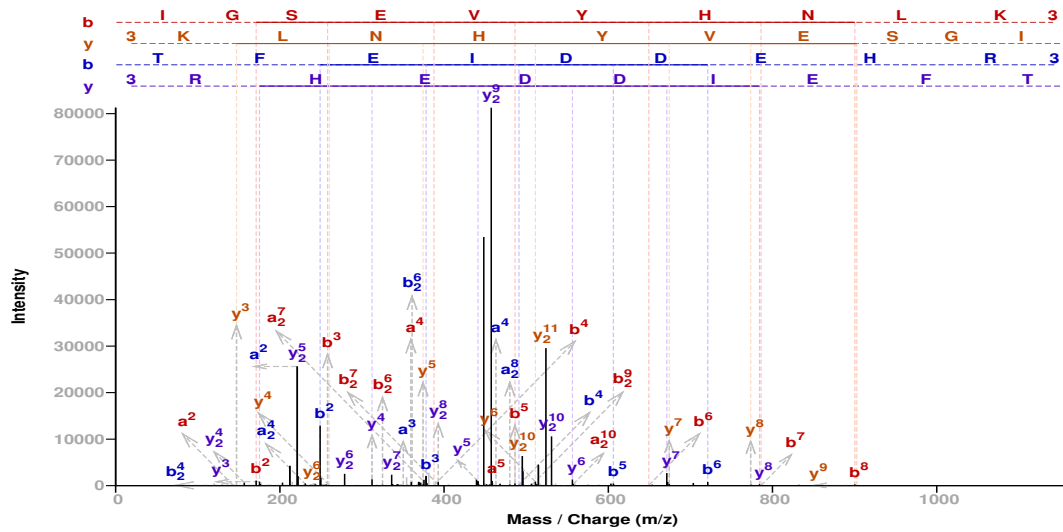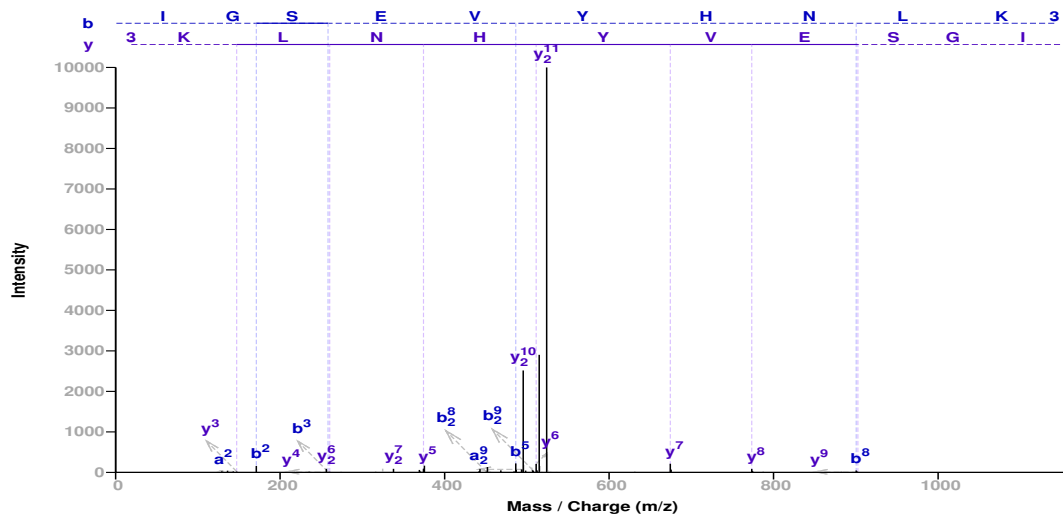





yeast0\_Scan\_Number\_4548 Precursor m/z: 539.791 cosine: 0.807  $\alpha$ : 0.293

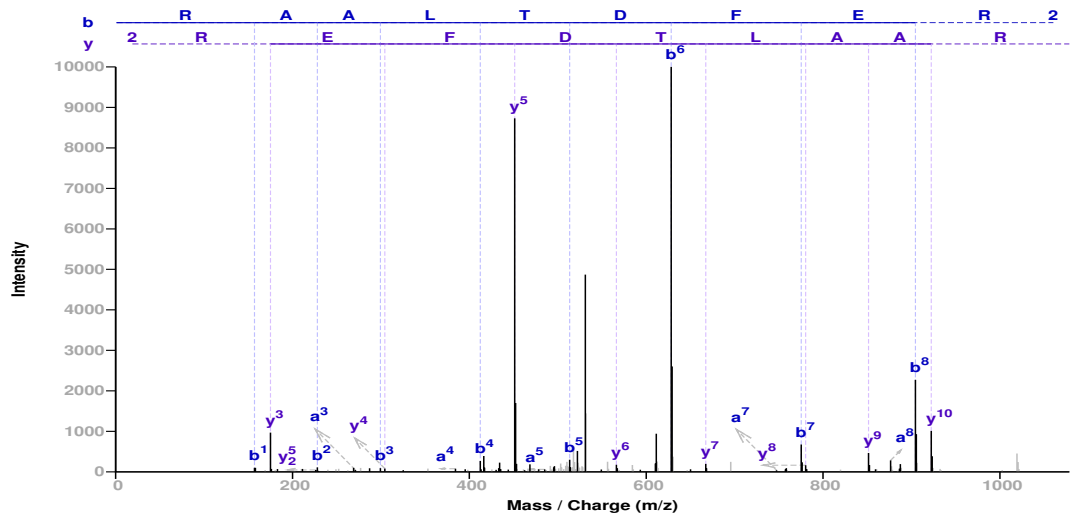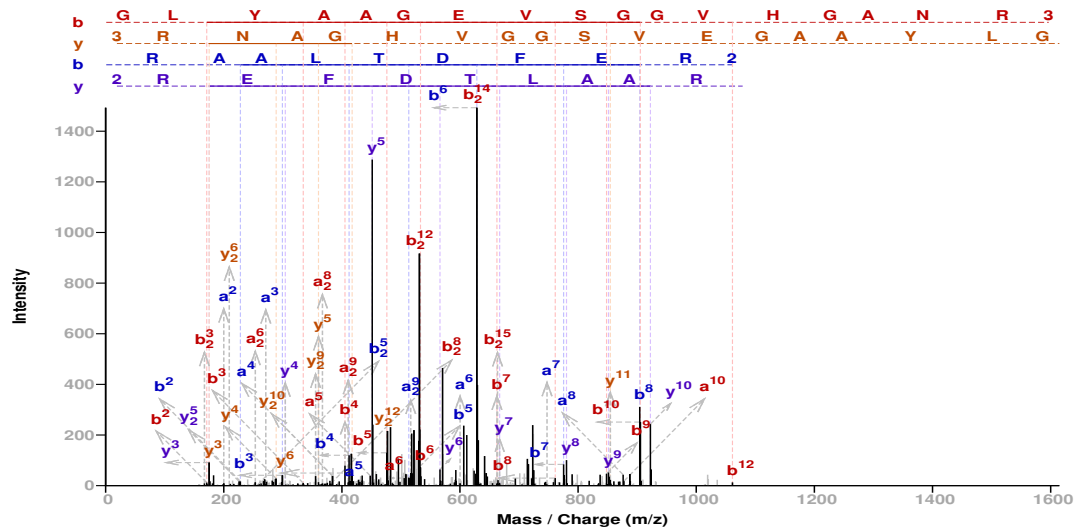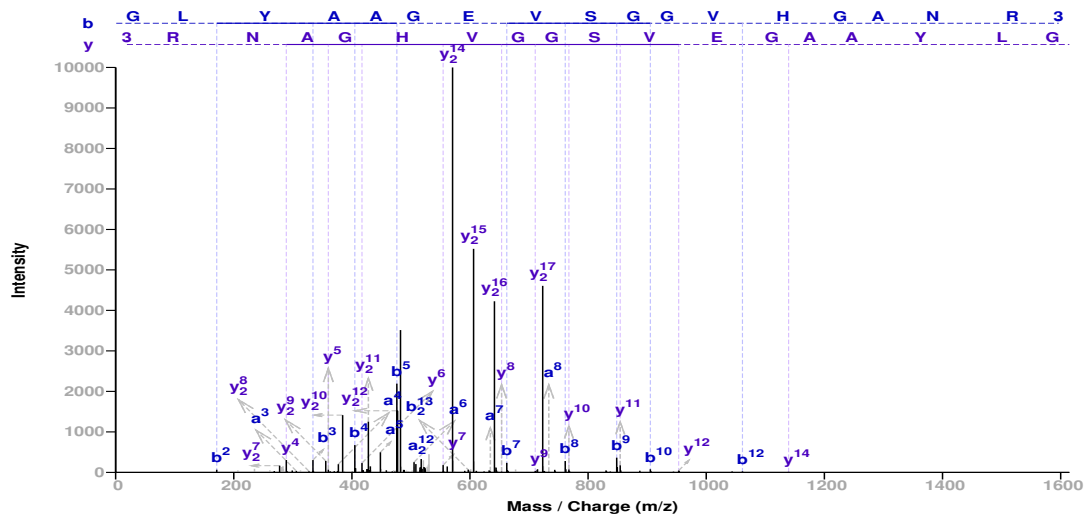

yeast0\_Scan\_Number\_9685 Precursor m/z: 564.976 cosine: 0.800  $\alpha$ : 0.284

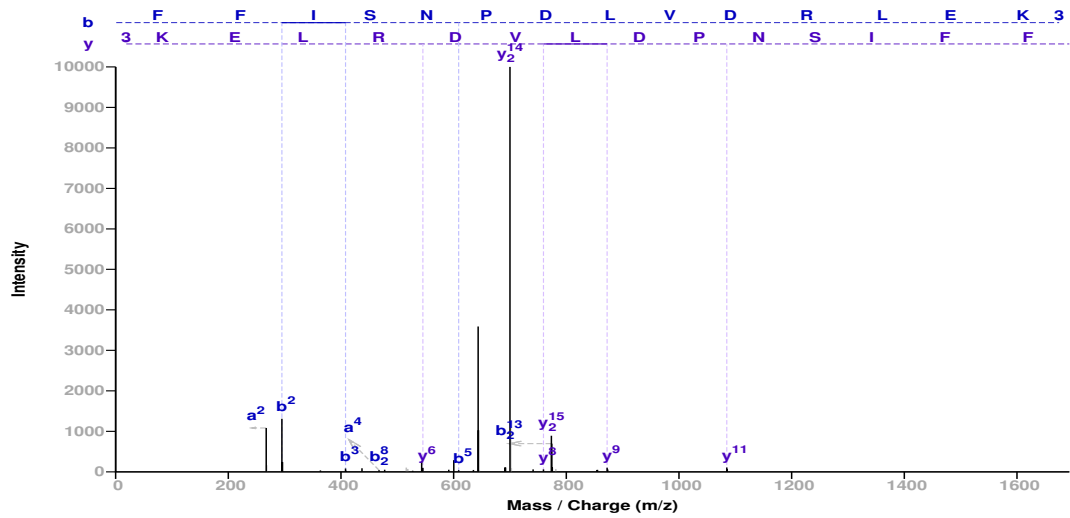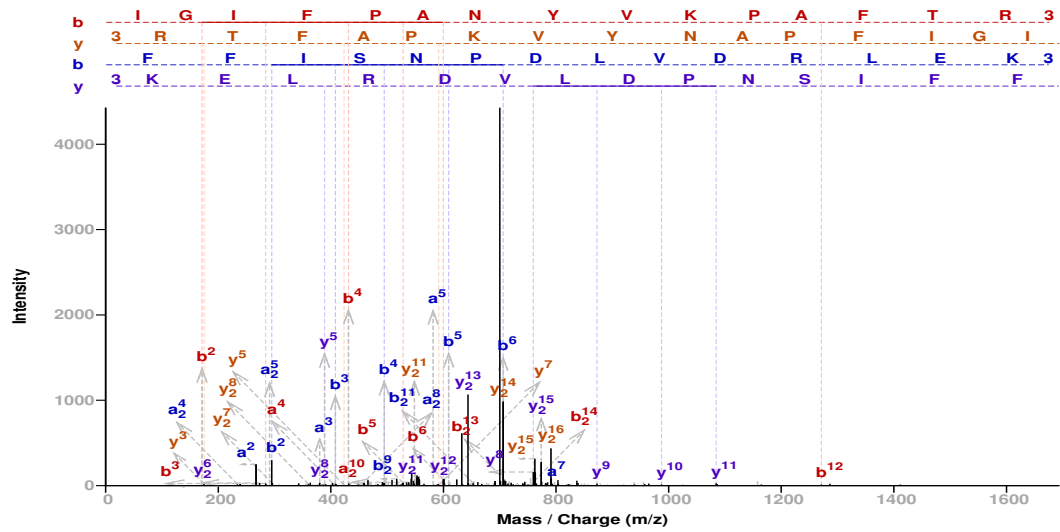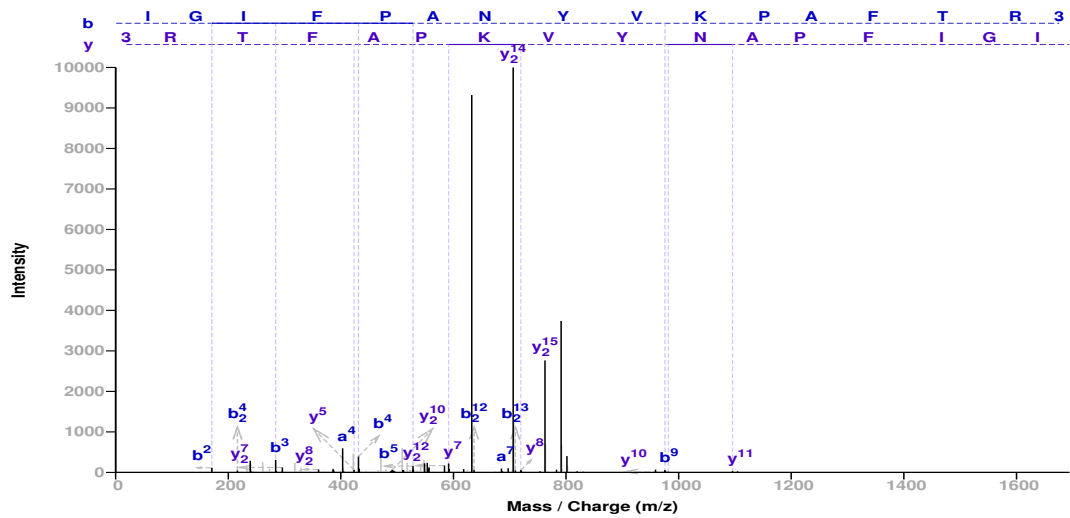

yeast0\_Scan\_Number\_950 Precursor m/z: 417.208 cosine: 0.877  $\alpha$ : 0.279

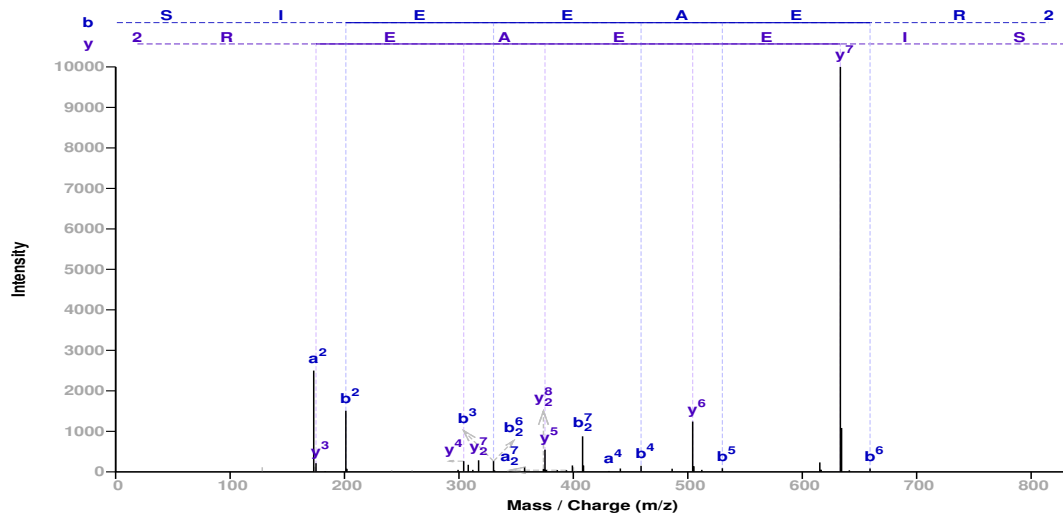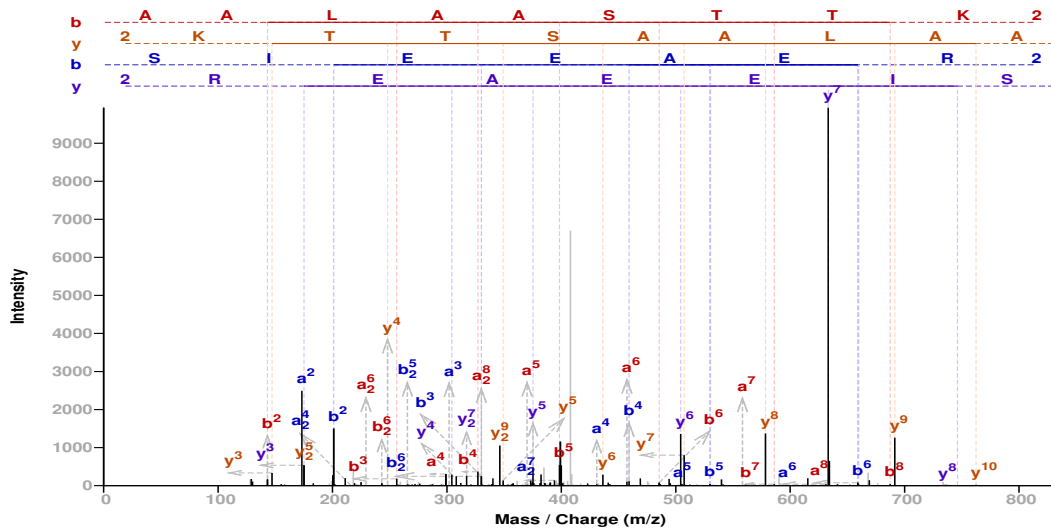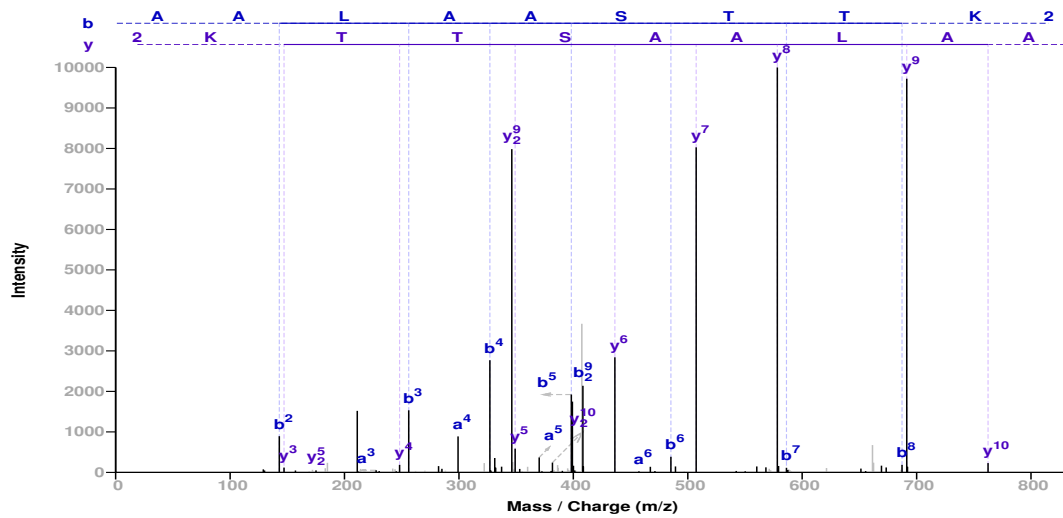

yeast0\_Scan\_Number\_2695 Precursor m/z: 380.718 cosine: 0.776  $\alpha$ : 0.277

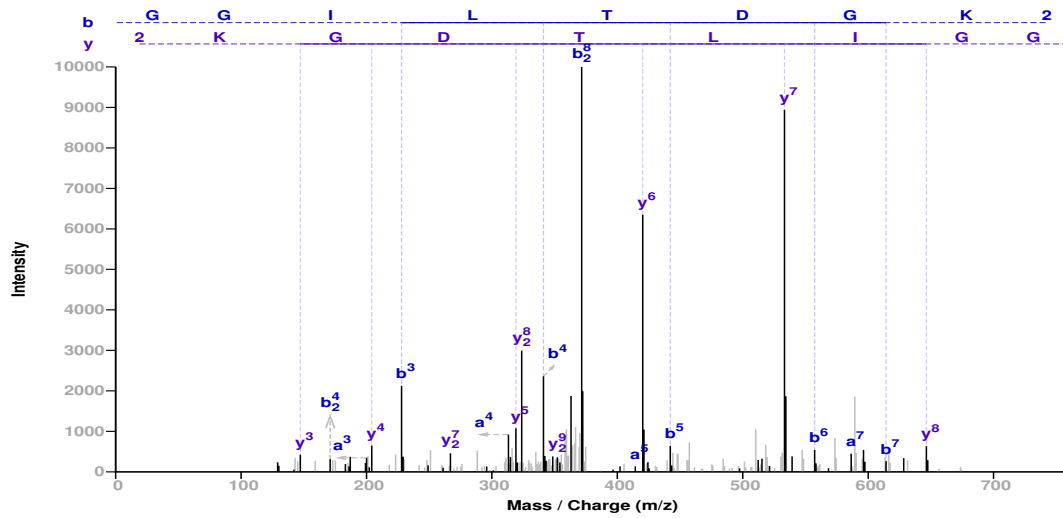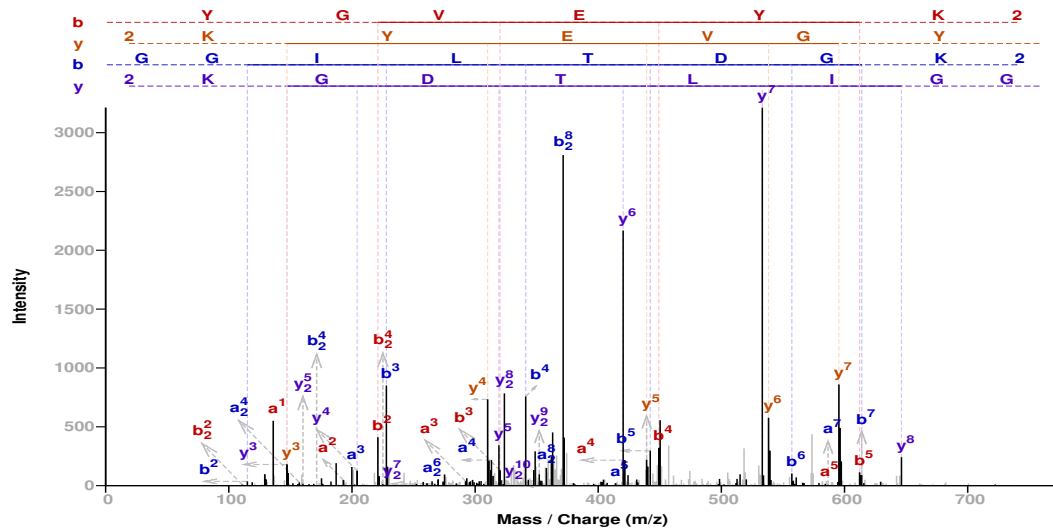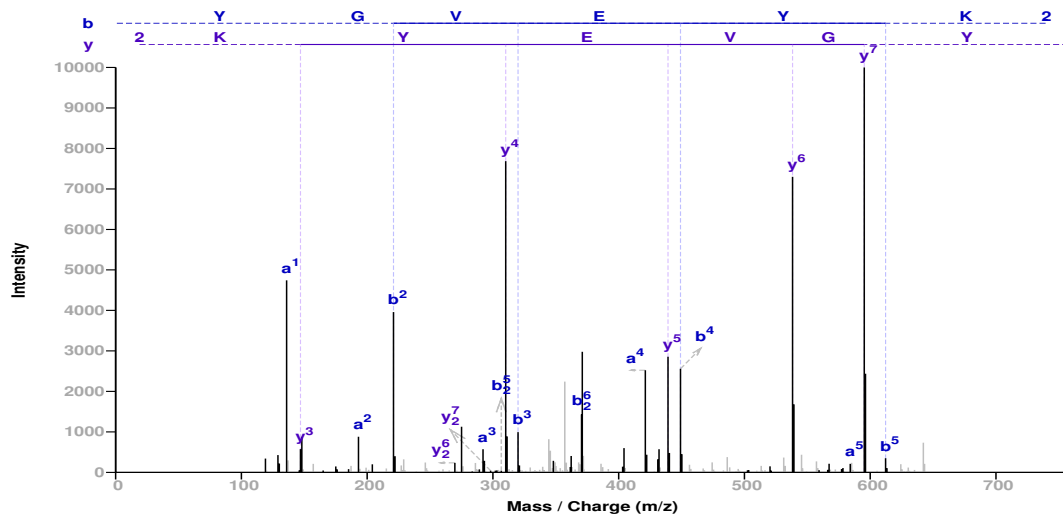

yeast0\_Scan\_Number\_2701 Precursor m/z: 436.583 cosine: 0.781  $\alpha$ : 0.271

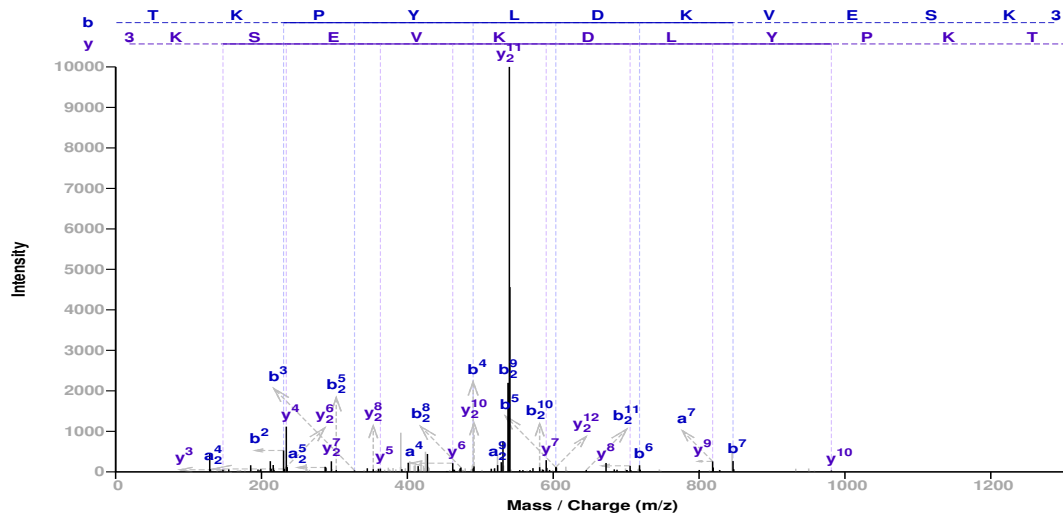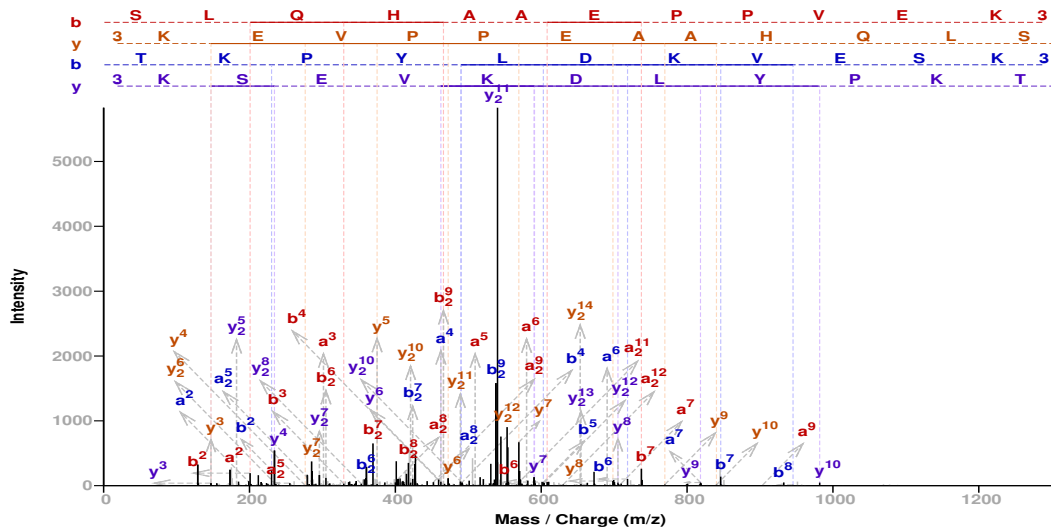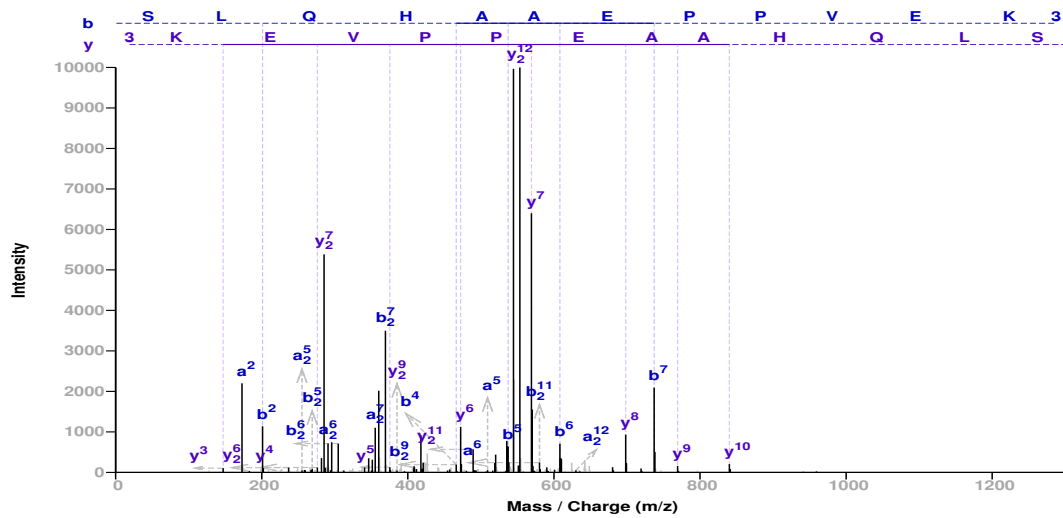

yeast0.Scan\_Number\_3606 Precursor m/z: 437.261 cosine: 0.802  $\alpha$ : 0.261

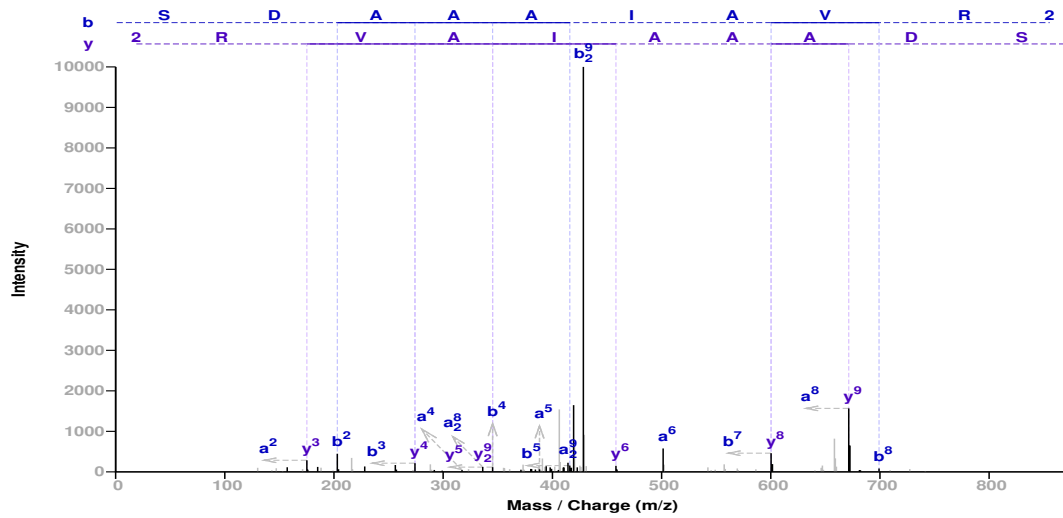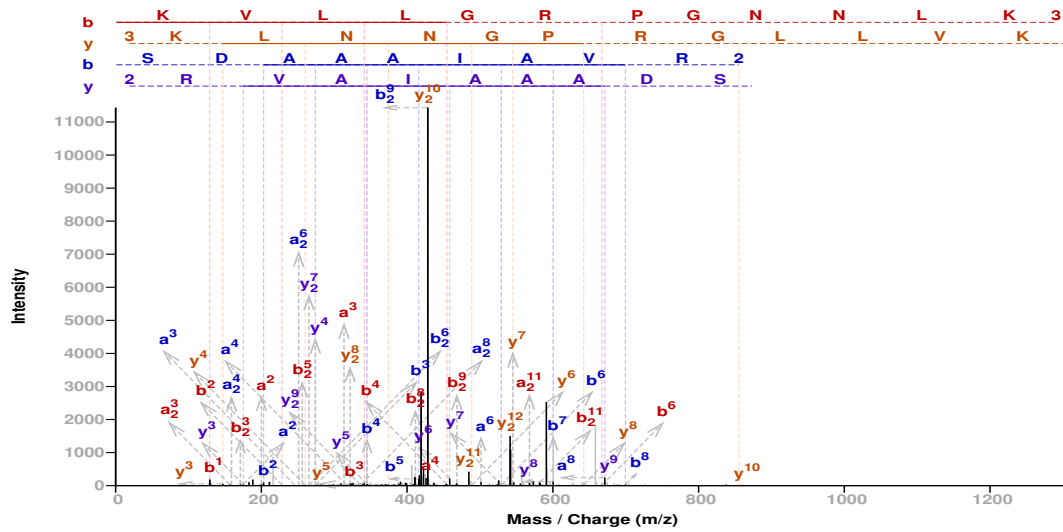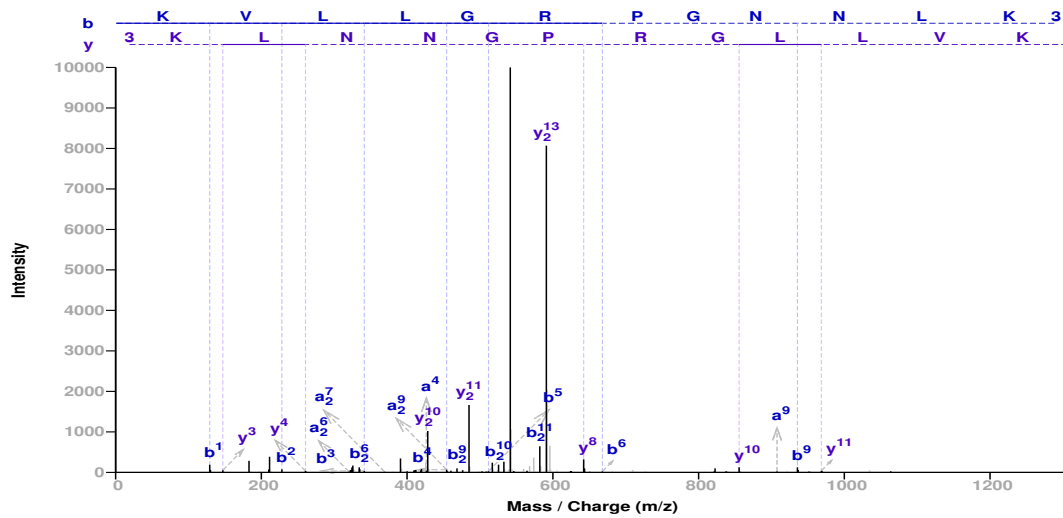

yeast0.Scan\_Number.1199 Precursor m/z: 361.517 cosine: 0.807  $\alpha$ : 0.259

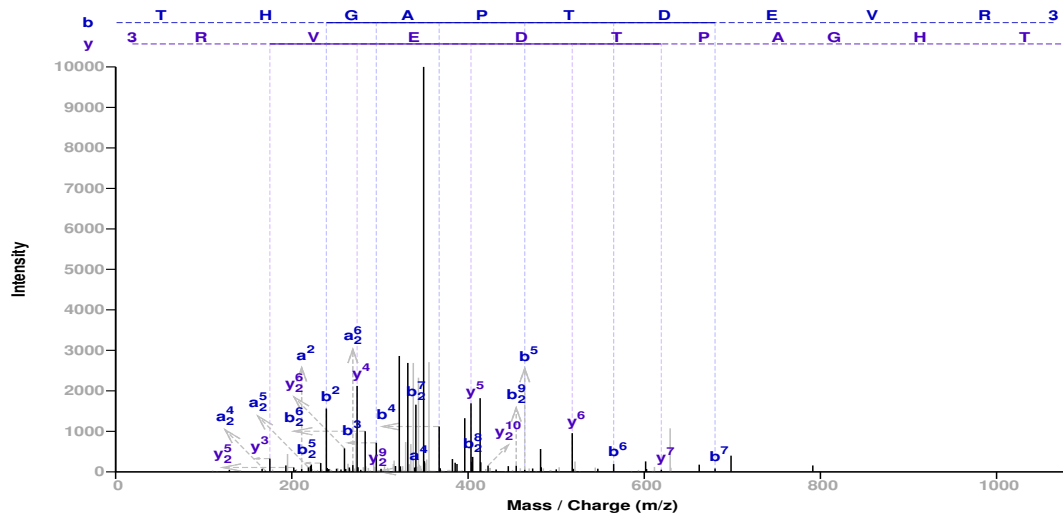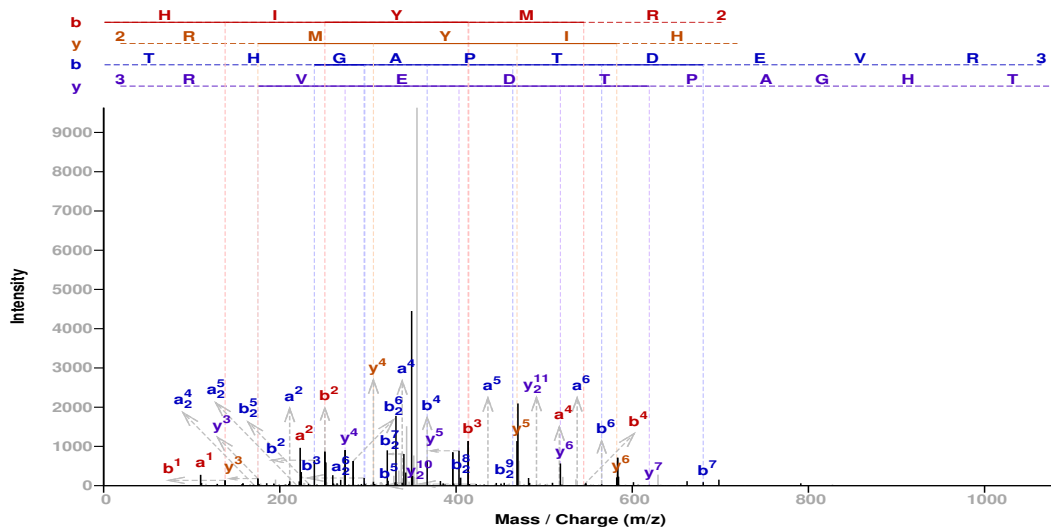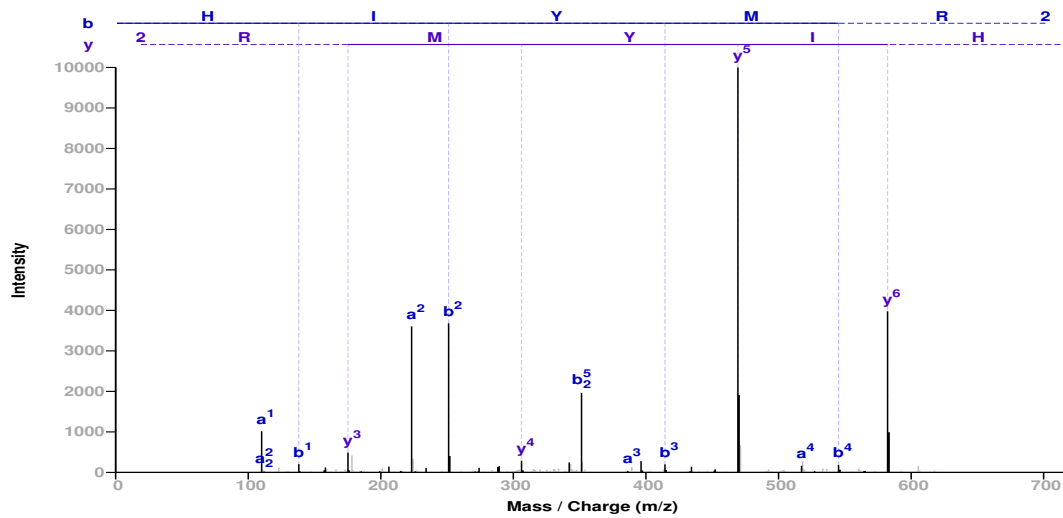



yeast0.Scan\_Number.4111 Precursor m/z: 511.920 cosine: 0.795  $\alpha$ : 0.255

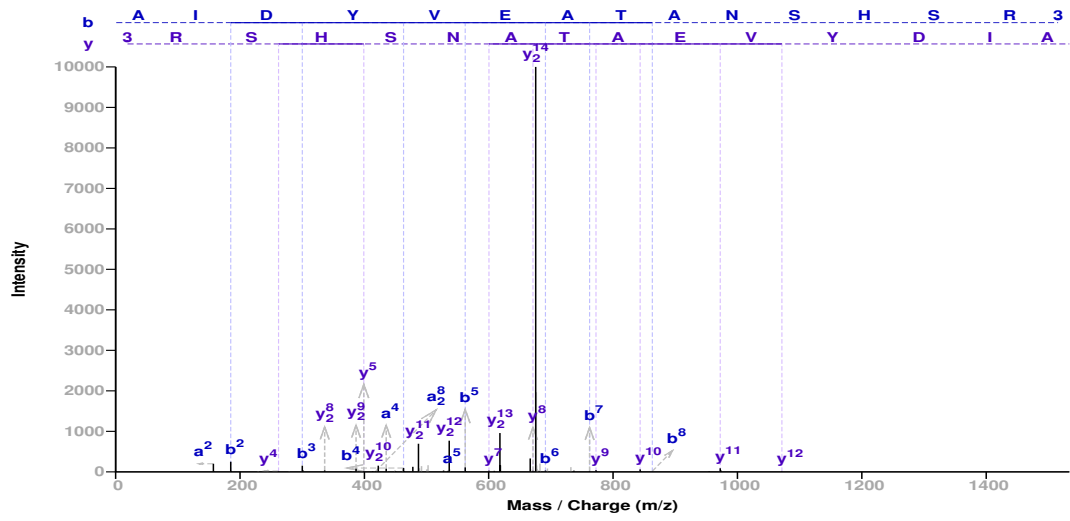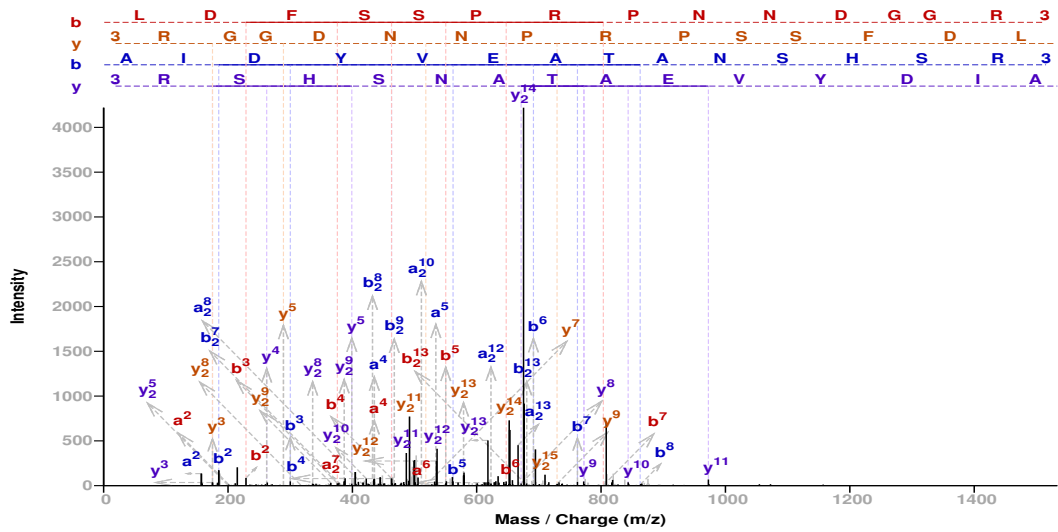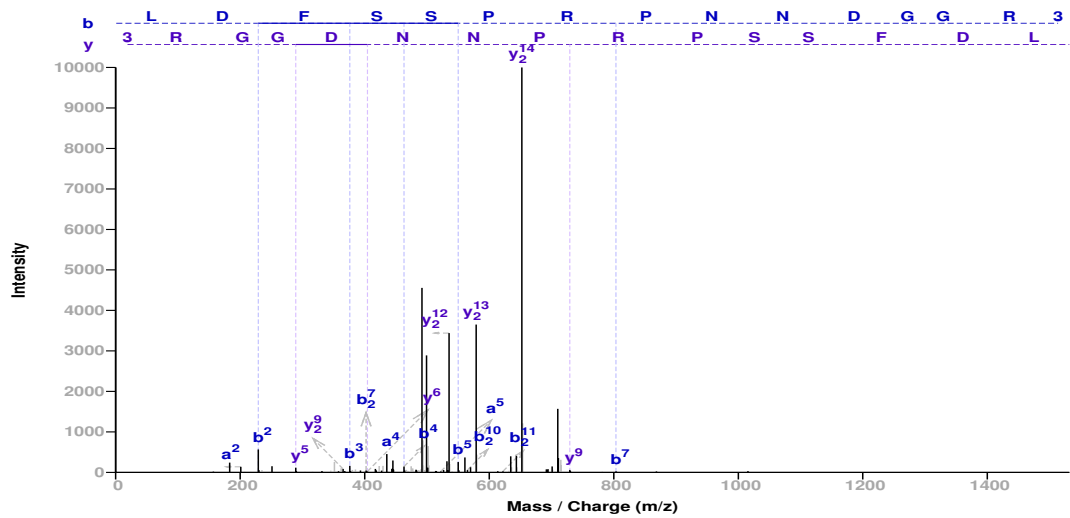

yeast0\_Scan\_Number\_4481 Precursor m/z: 609.307 cosine: 0.781  $\alpha$ : 0.255

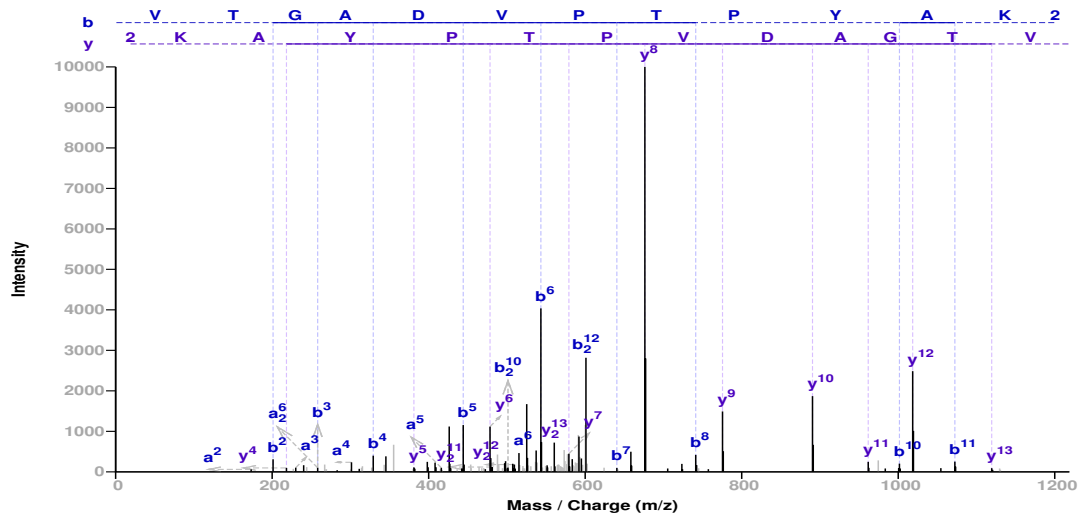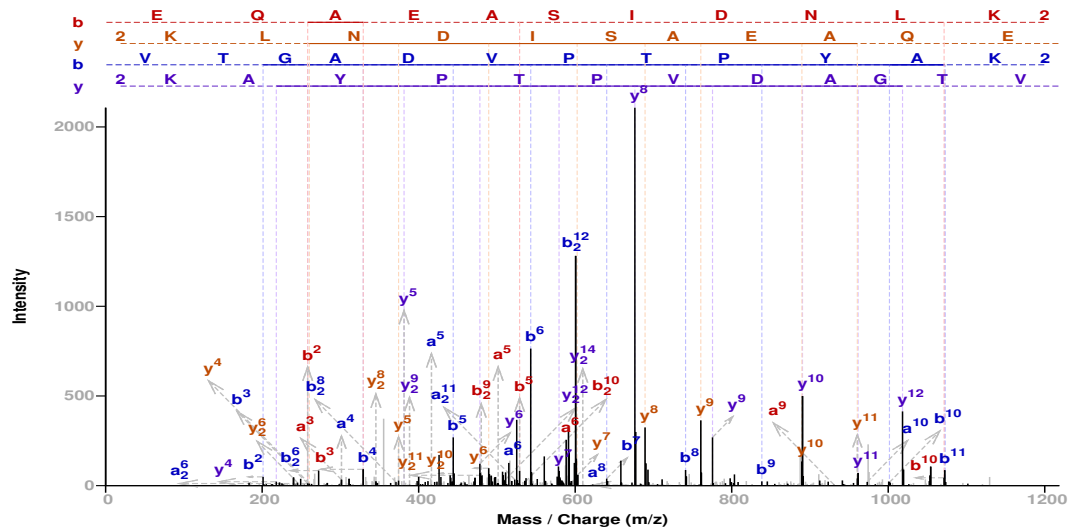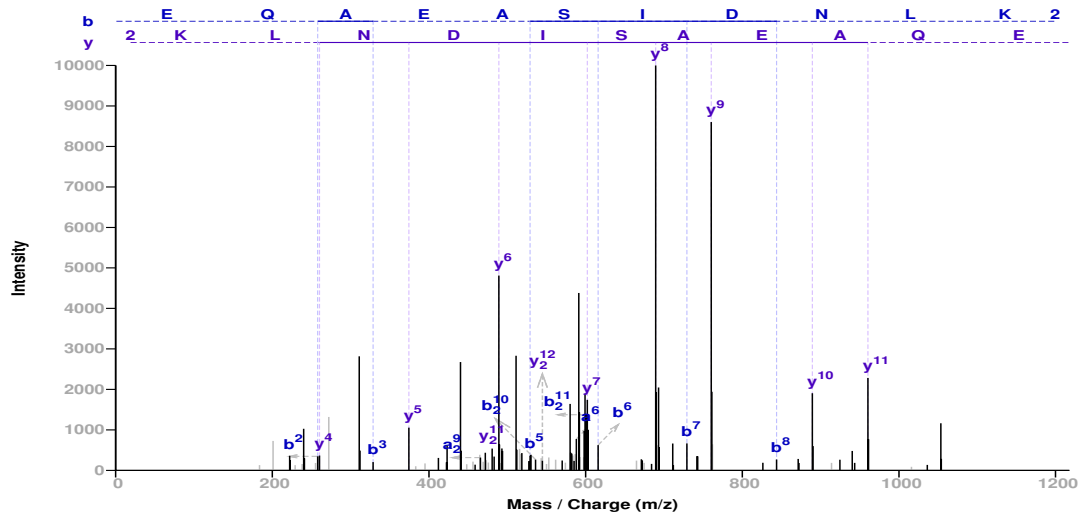

yeast0.Scan\_Number\_5462 Precursor m/z: 355.202 cosine: 0.744  $\alpha$ : 0.251

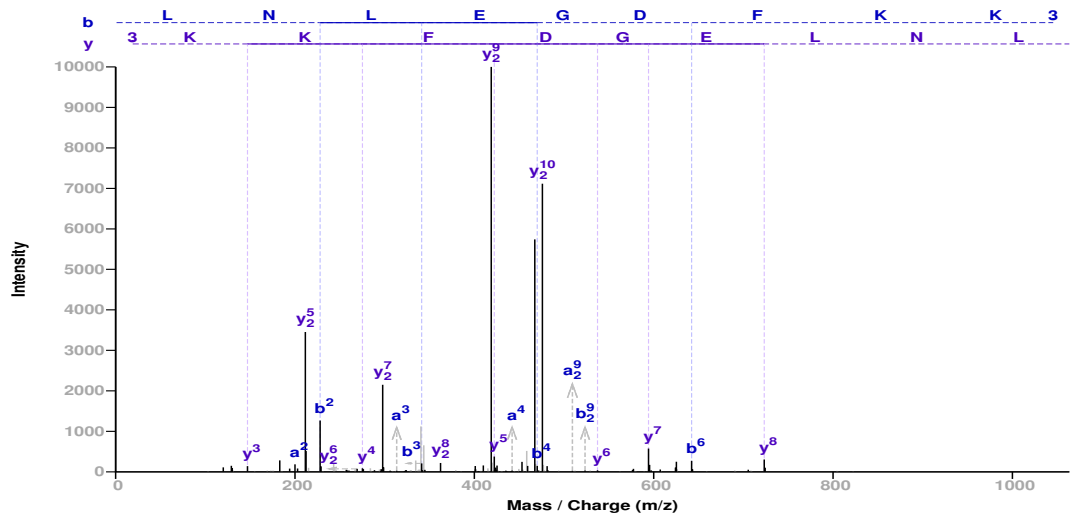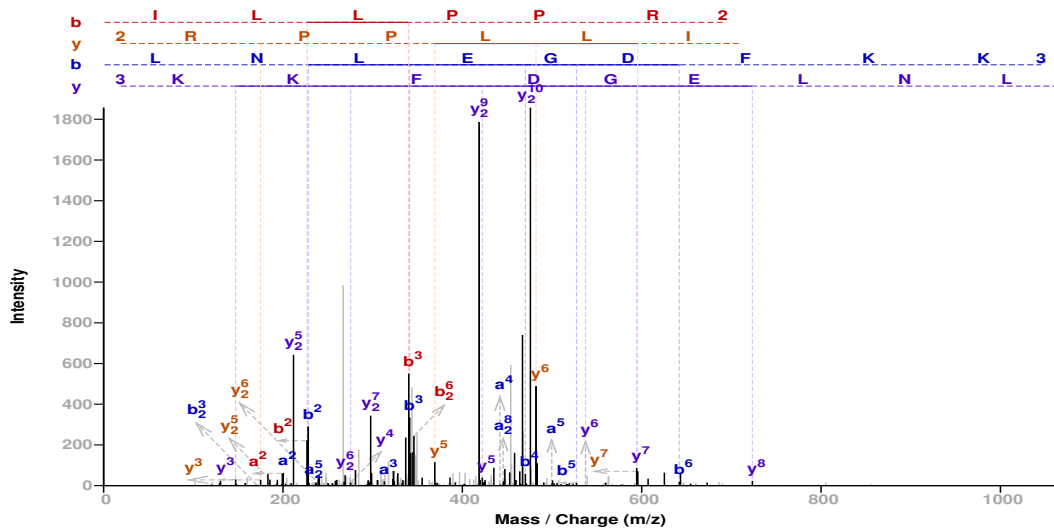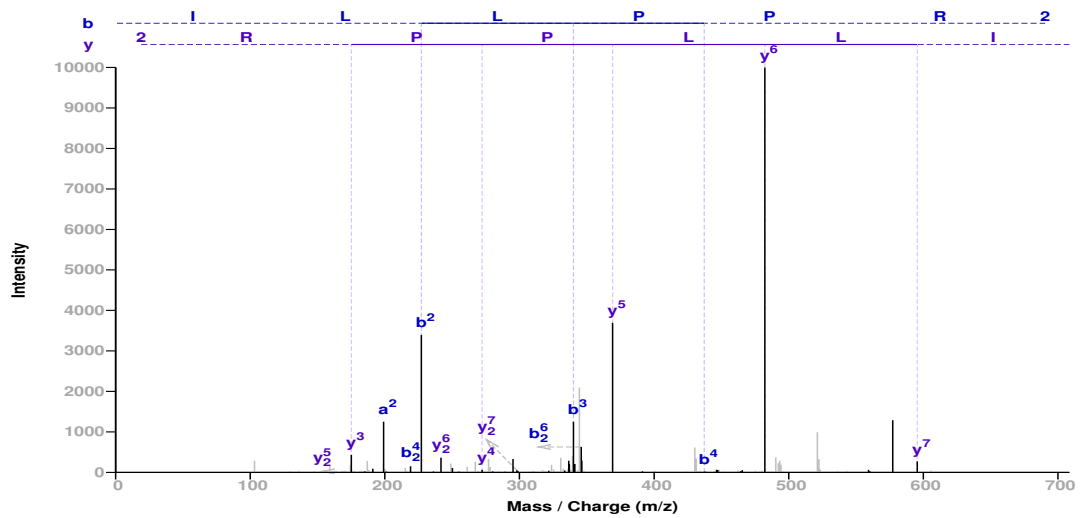

yeast0.Scan\_Number\_3958 Precursor m/z: 390.719 cosine: 0.841  $\alpha$ : 0.244

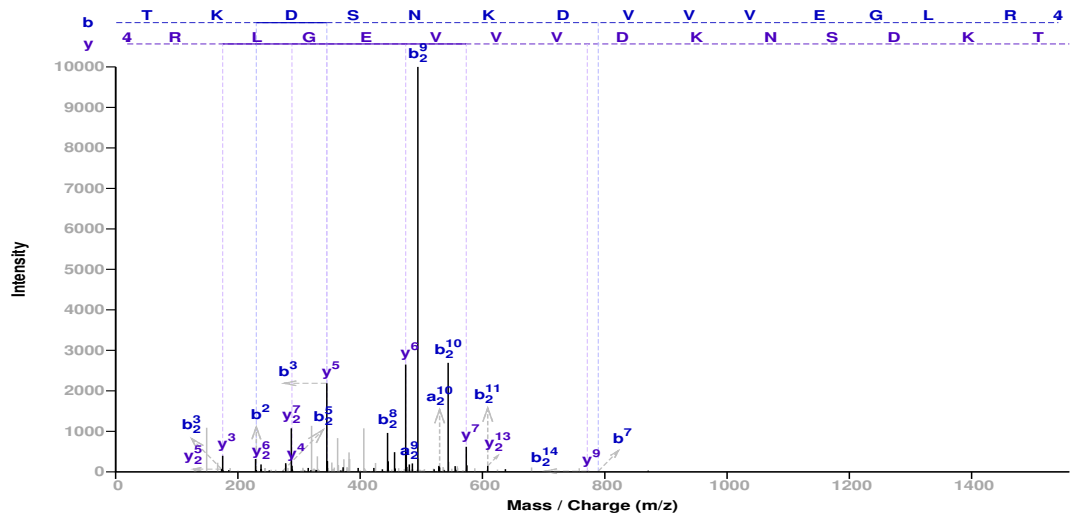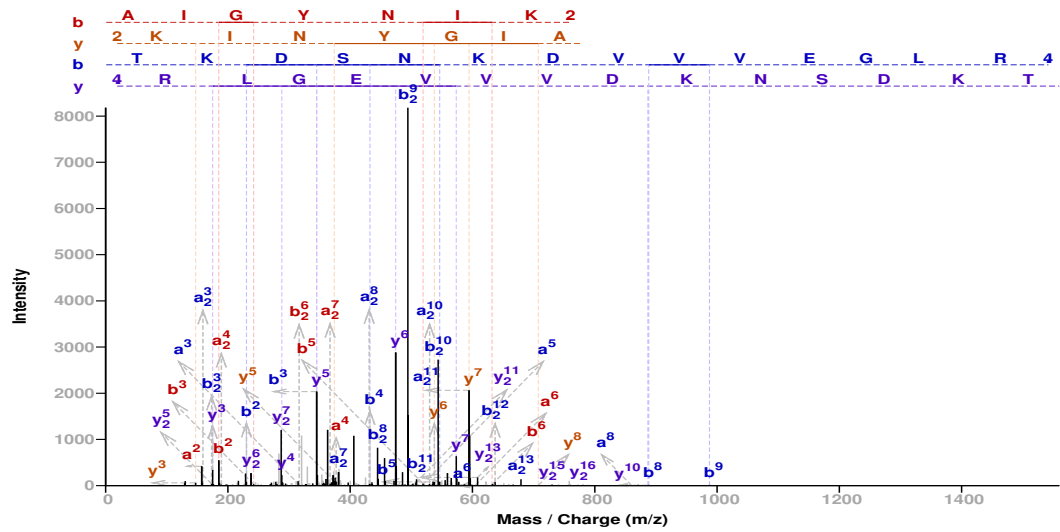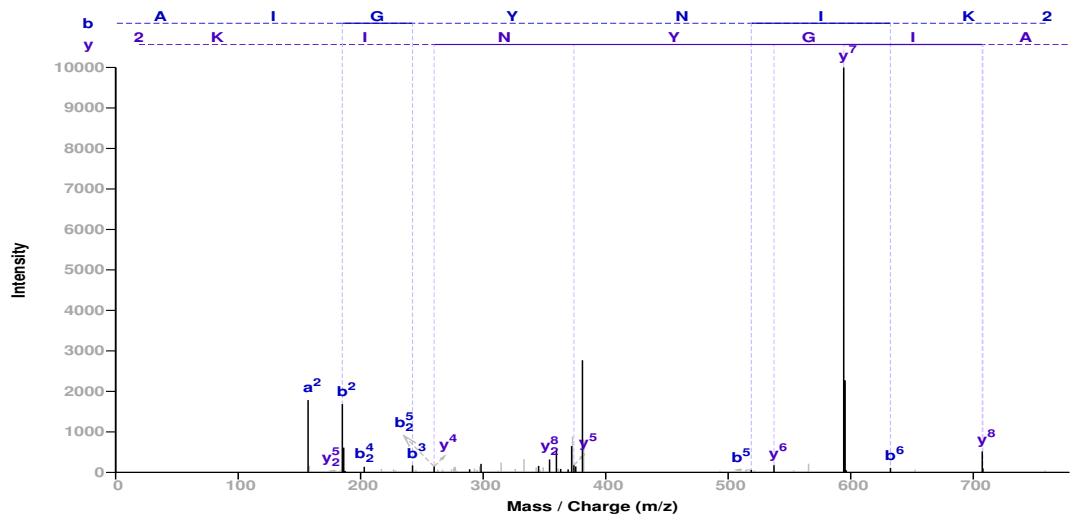

yeast0.Scan\_Number\_4046 Precursor m/z: 515.779 cosine: 0.753  $\alpha$ : 0.244

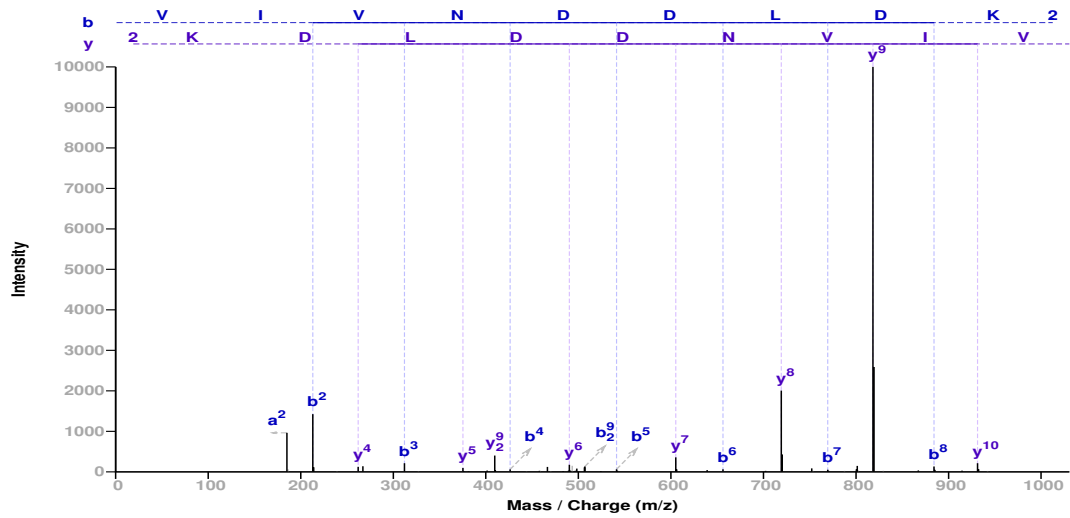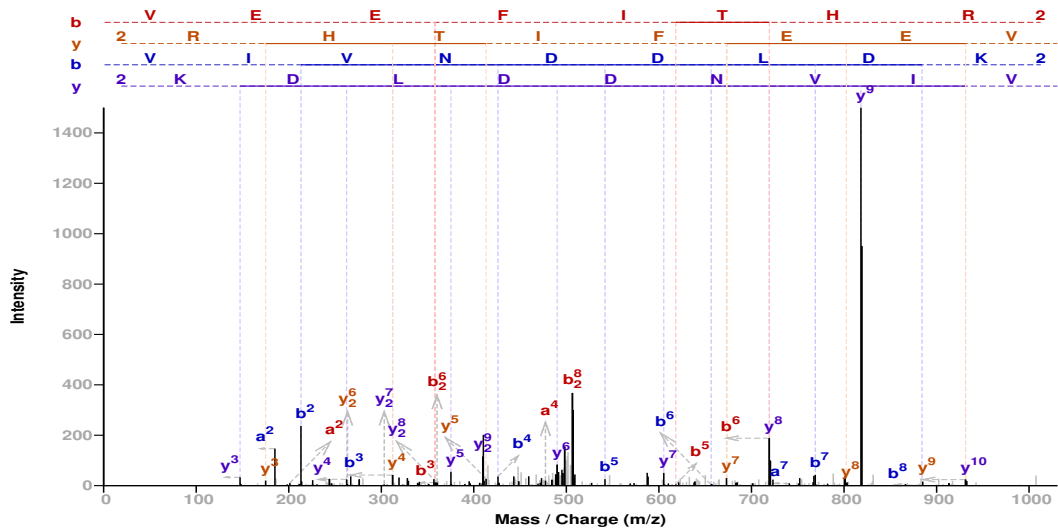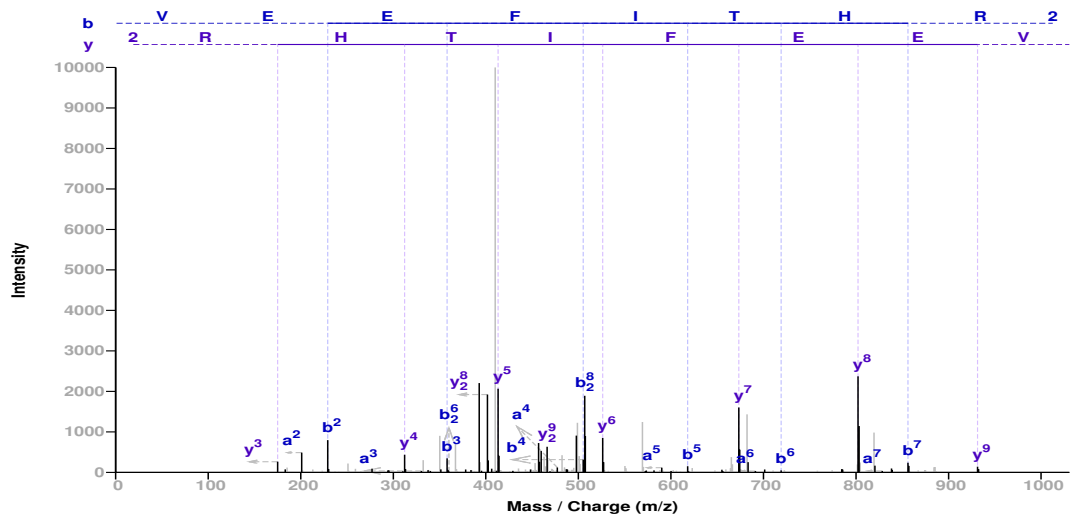



yeast0.Scan\_Number\_3223 Precursor m/z: 568.295 cosine: 0.829  $\alpha$ : 0.234

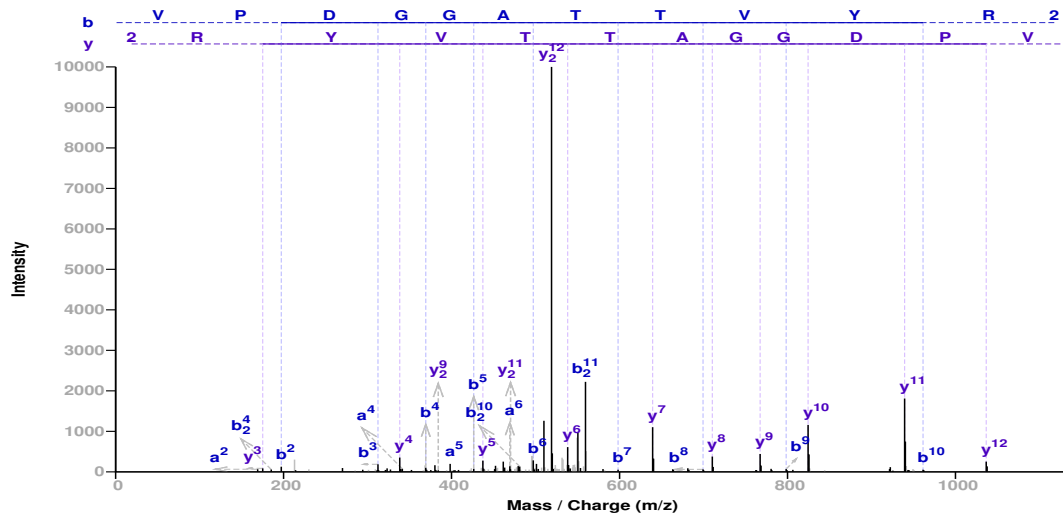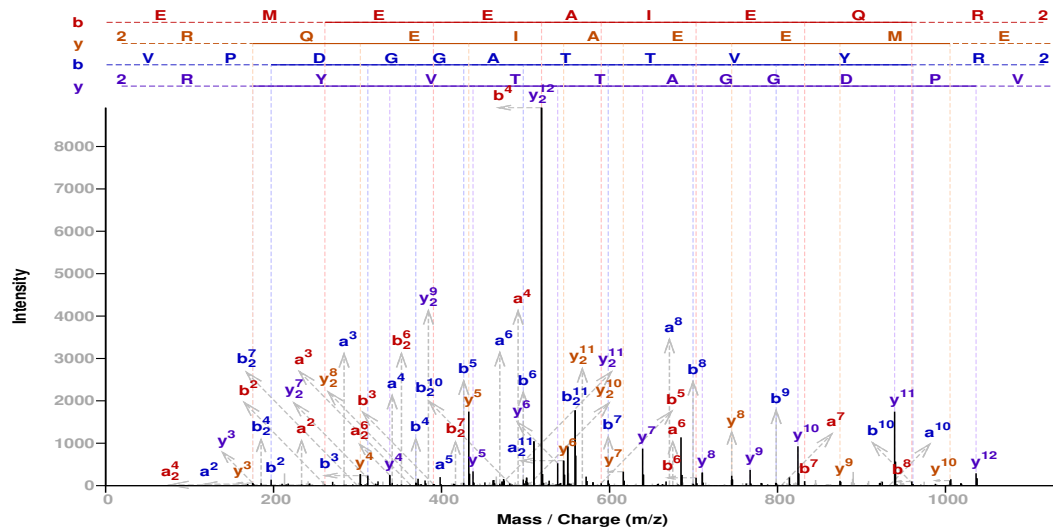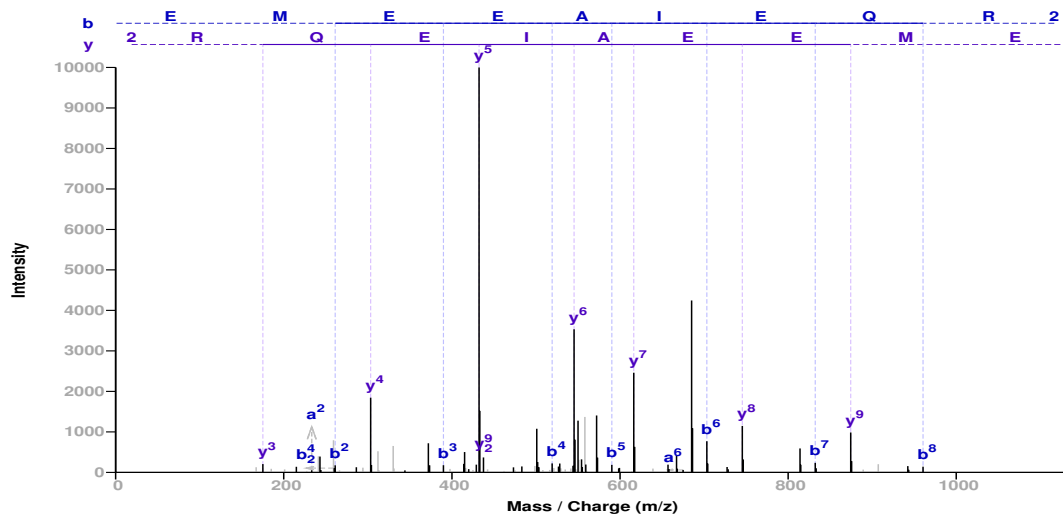





yeast0.Scan\_Number.1523 Precursor m/z: 519.735 cosine: 0.830  $\alpha$ : 0.230

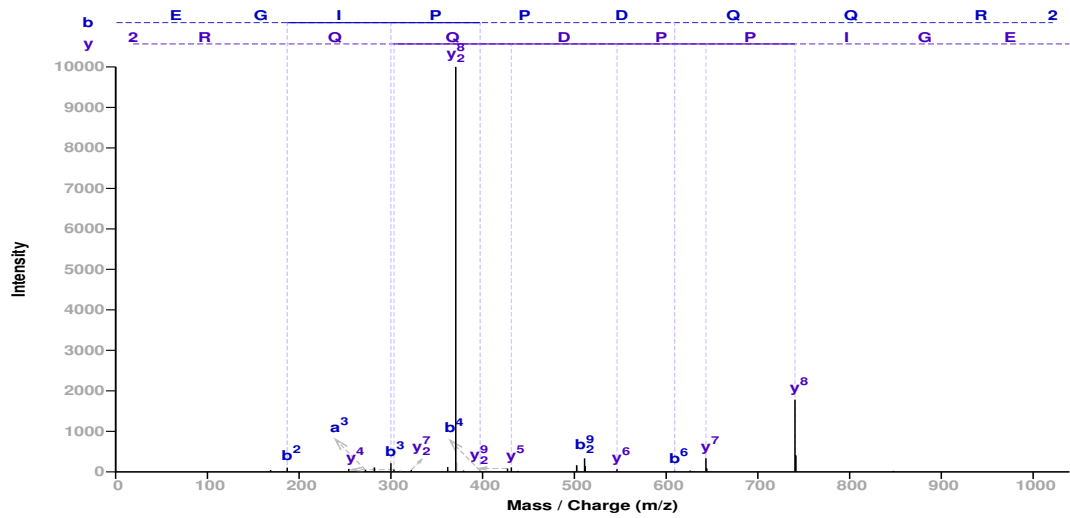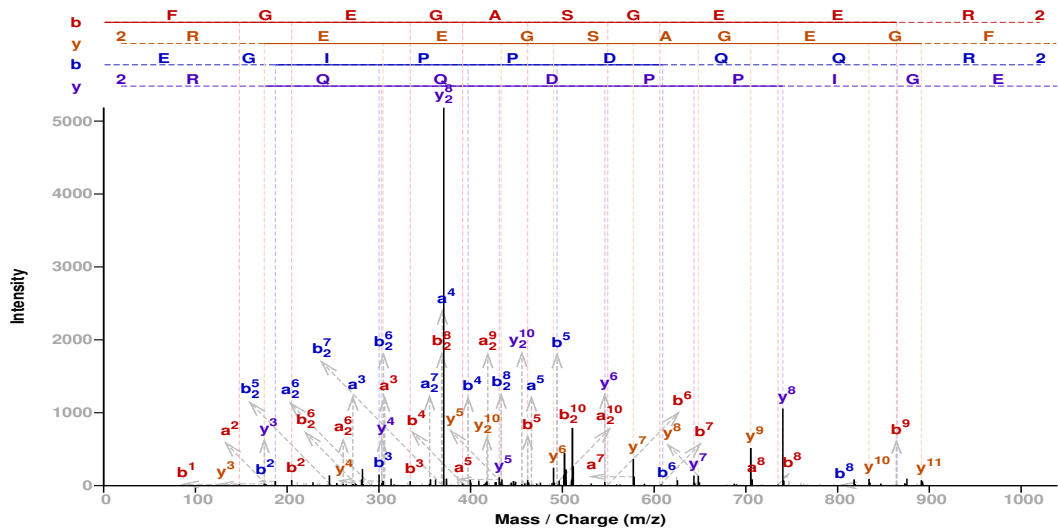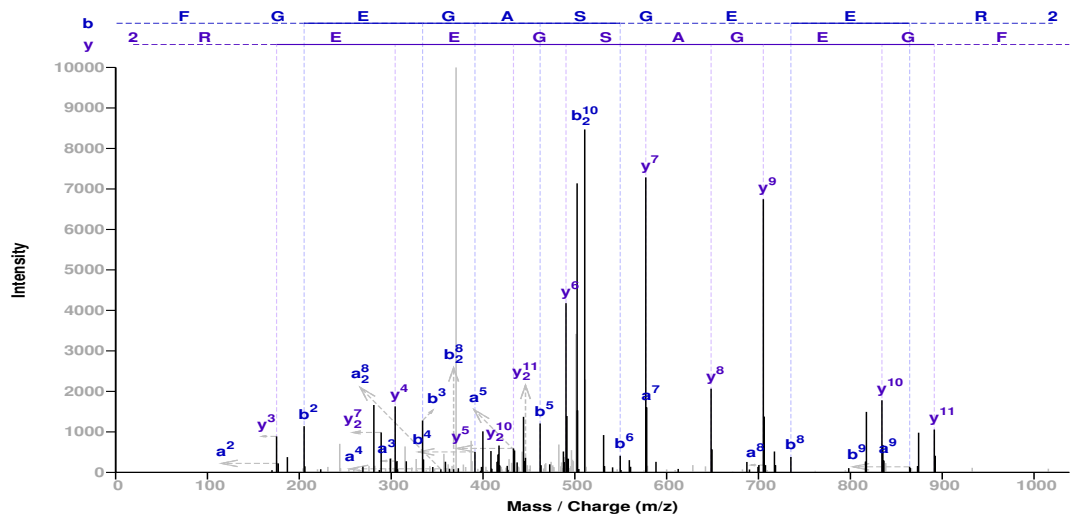

yeast0\_Scan\_Number\_5593 Precursor m/z: 530.597 cosine: 0.846  $\alpha$ : 0.228

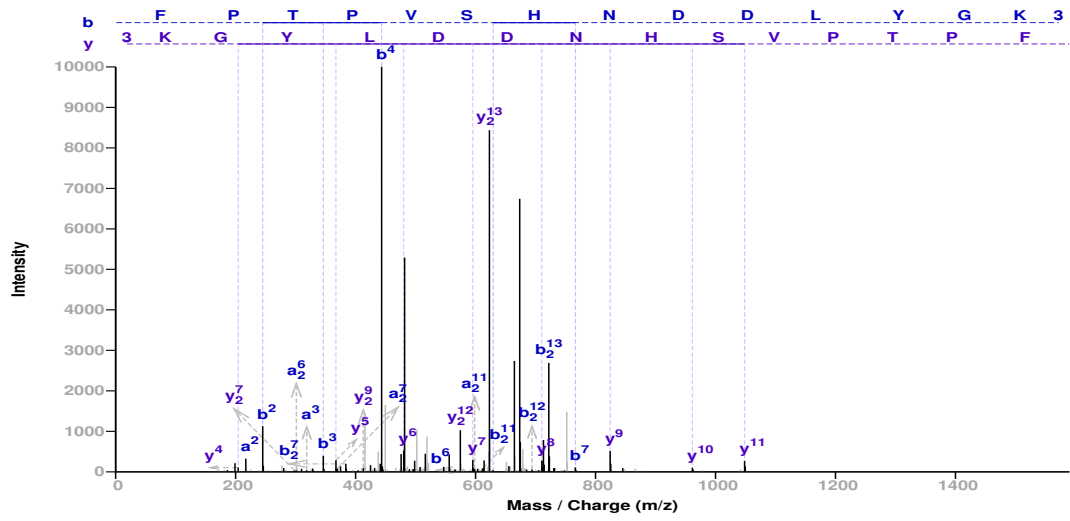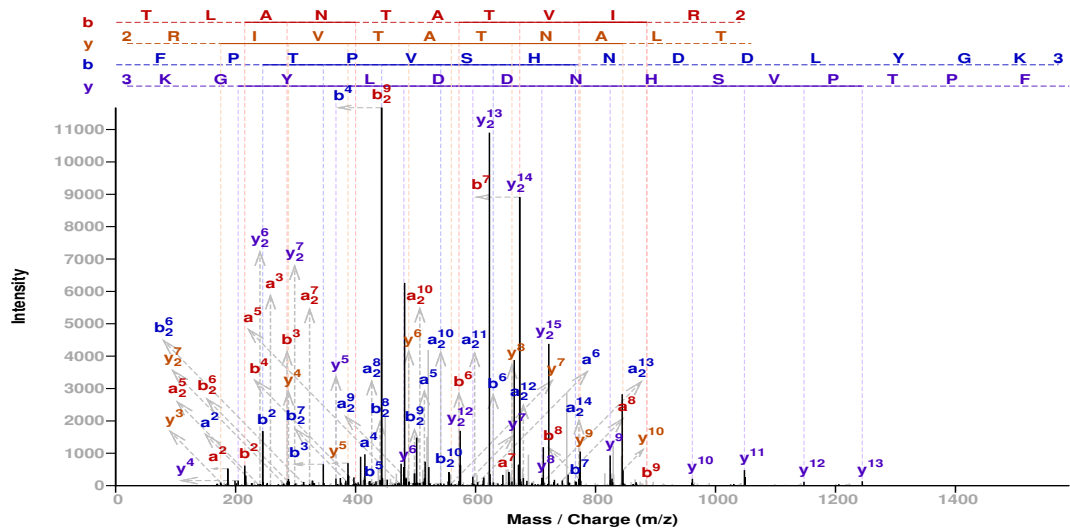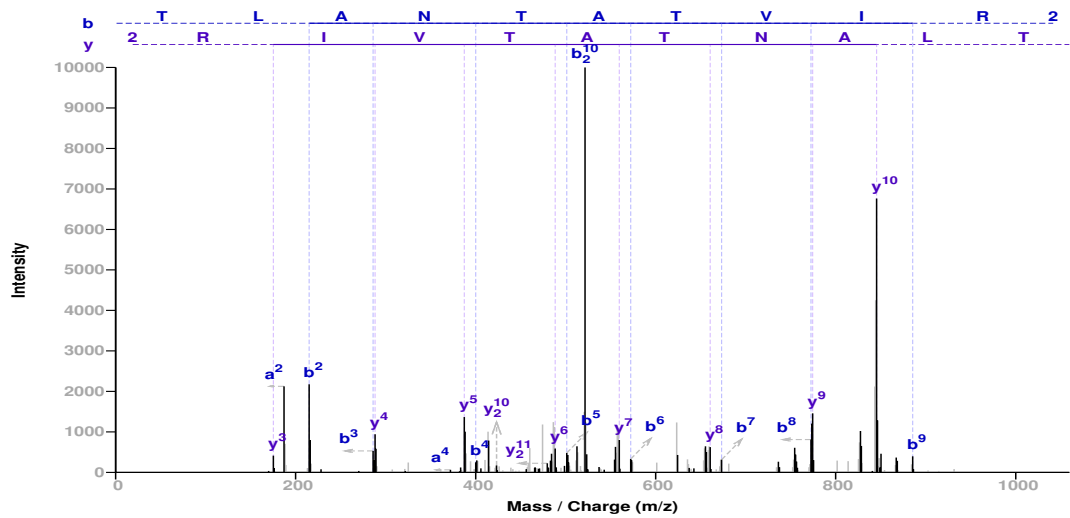



yeast0.Scan\_Number.1694 Precursor m/z: 406.719 cosine: 0.853  $\alpha$ : 0.214

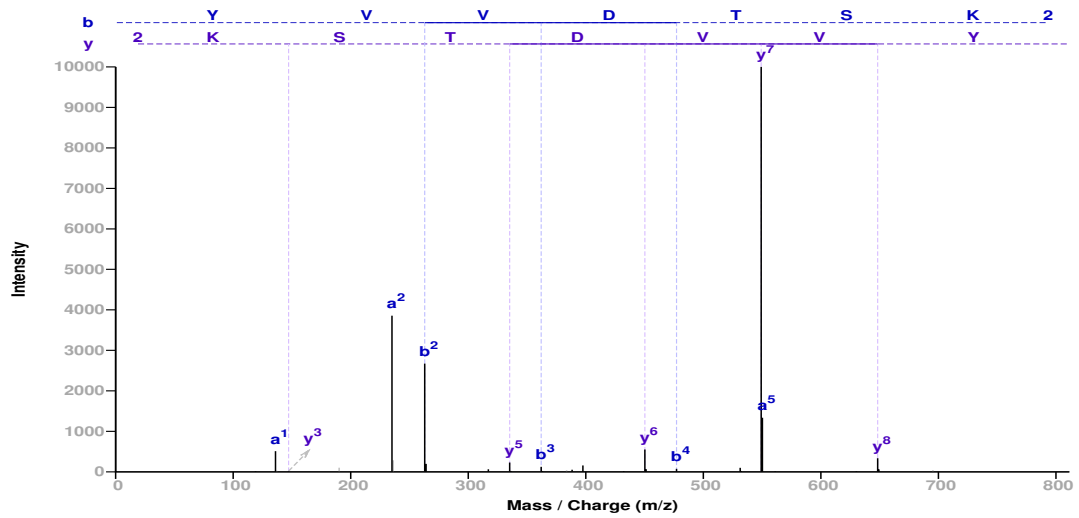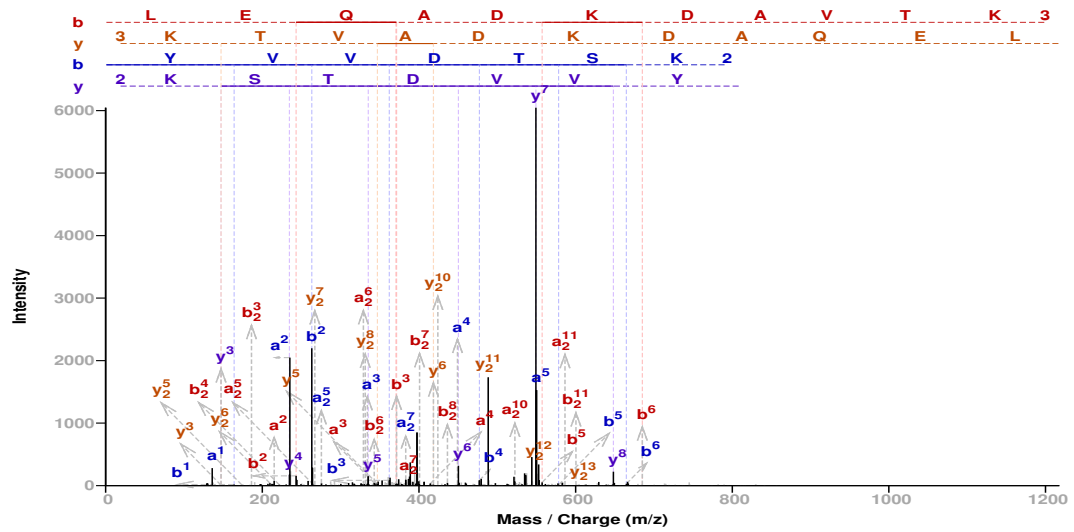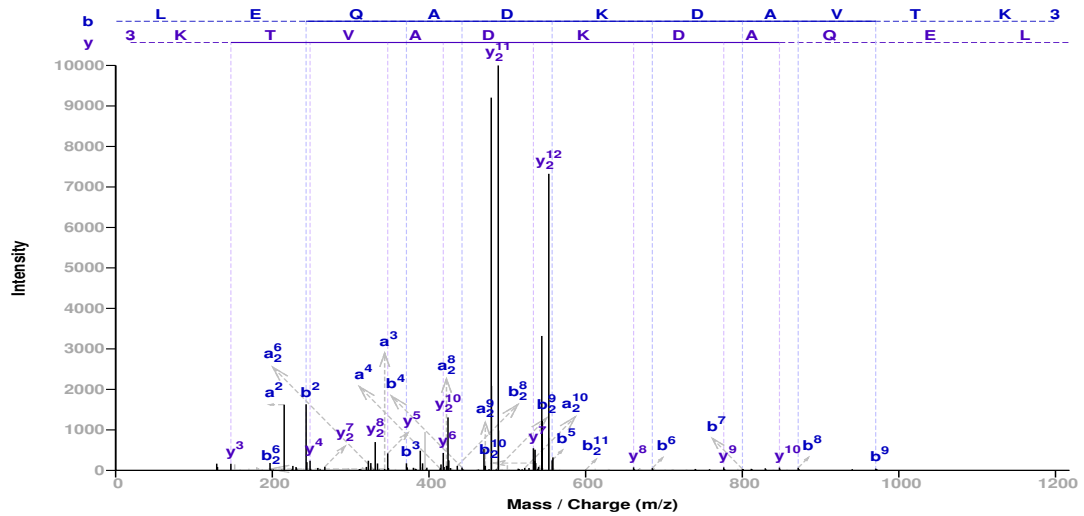

yeast0\_Scan\_Number\_6764 Precursor m/z: 436.587 cosine: 0.794  $\alpha$ : 0.209

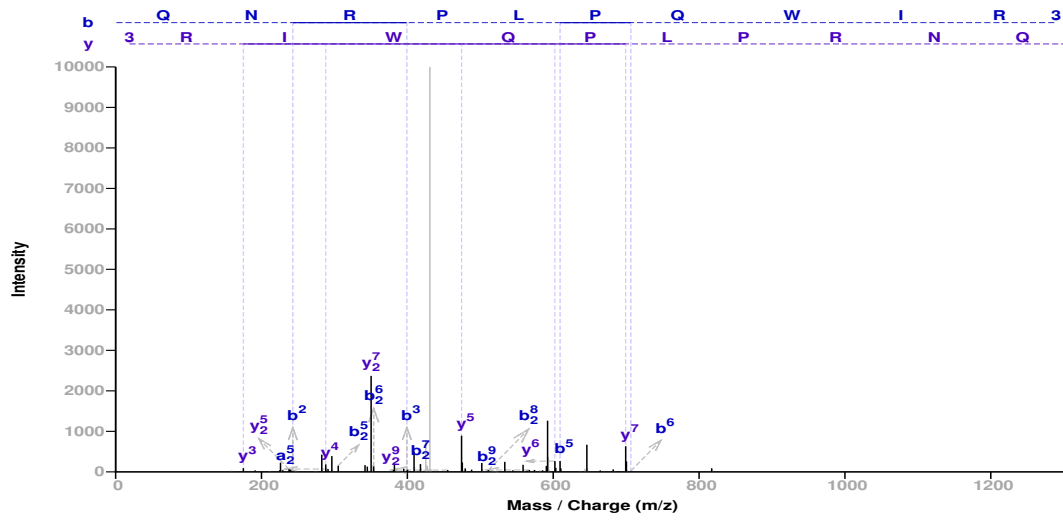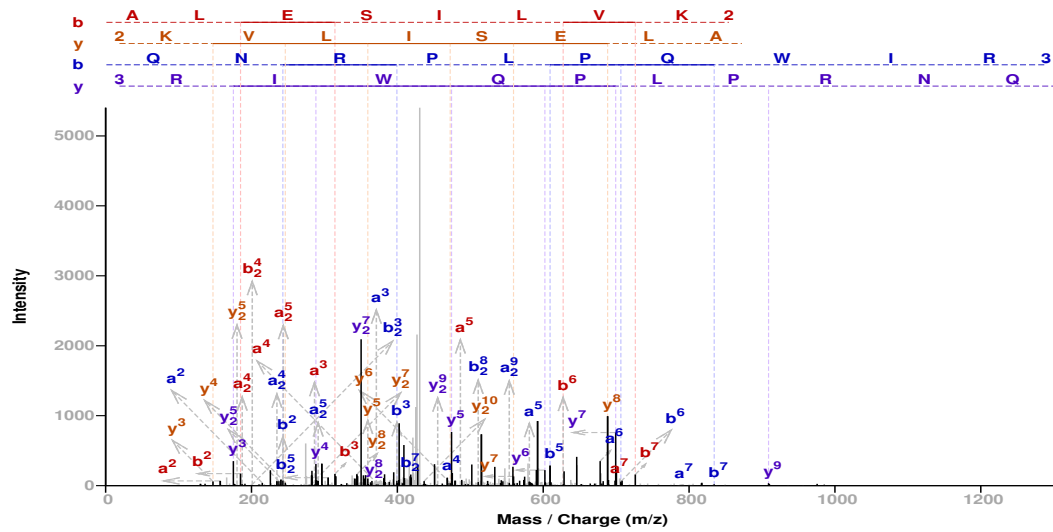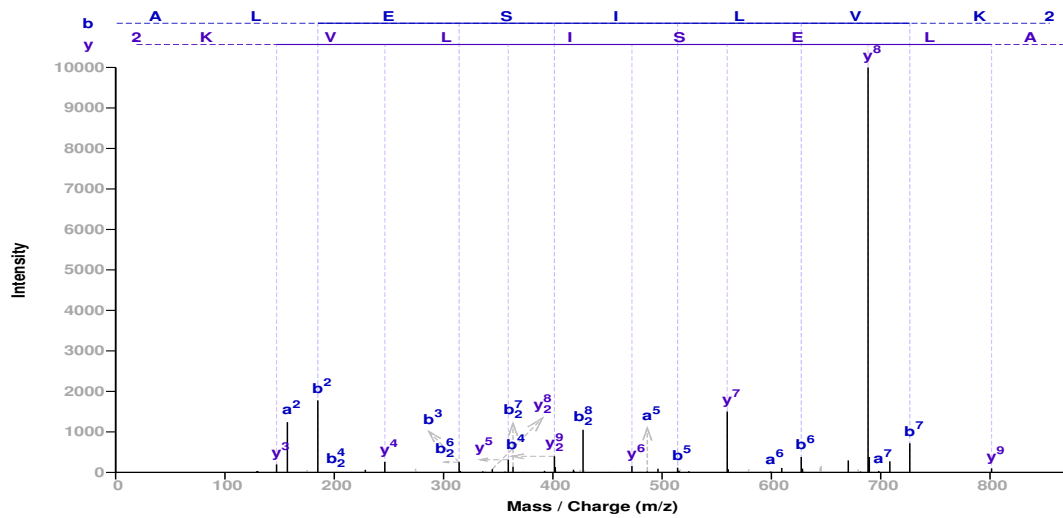

yeast0\_Scan\_Number\_7182 Precursor m/z: 435.287 cosine: 0.893  $\alpha$ : 0.209

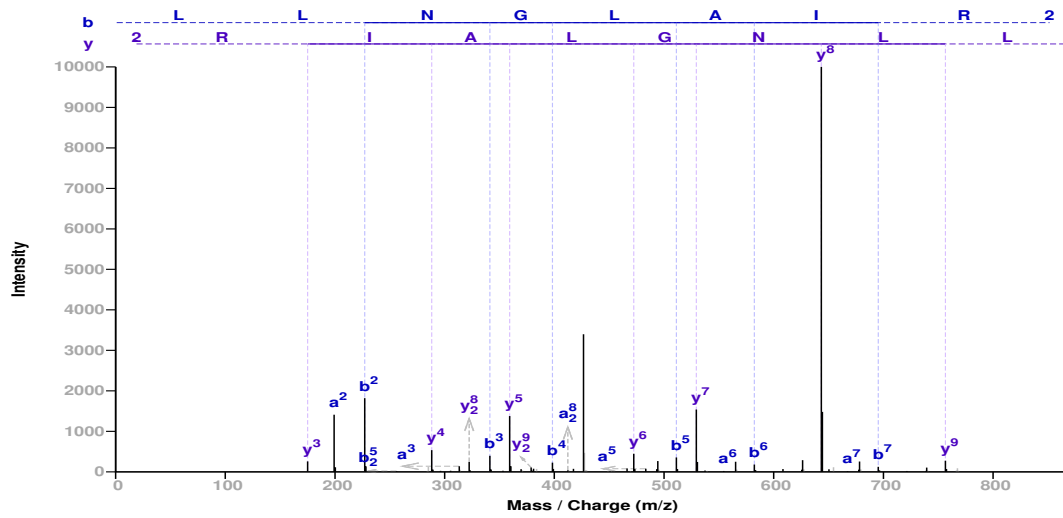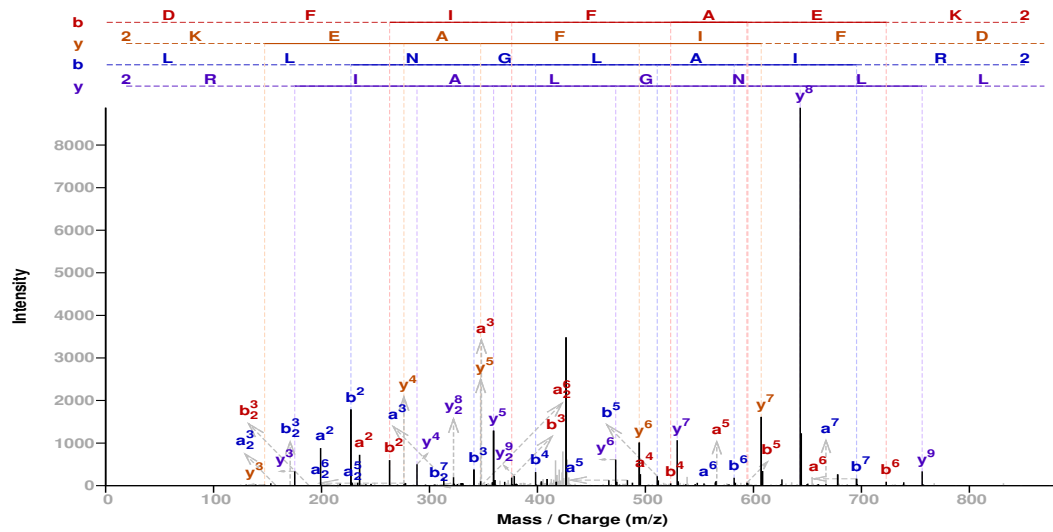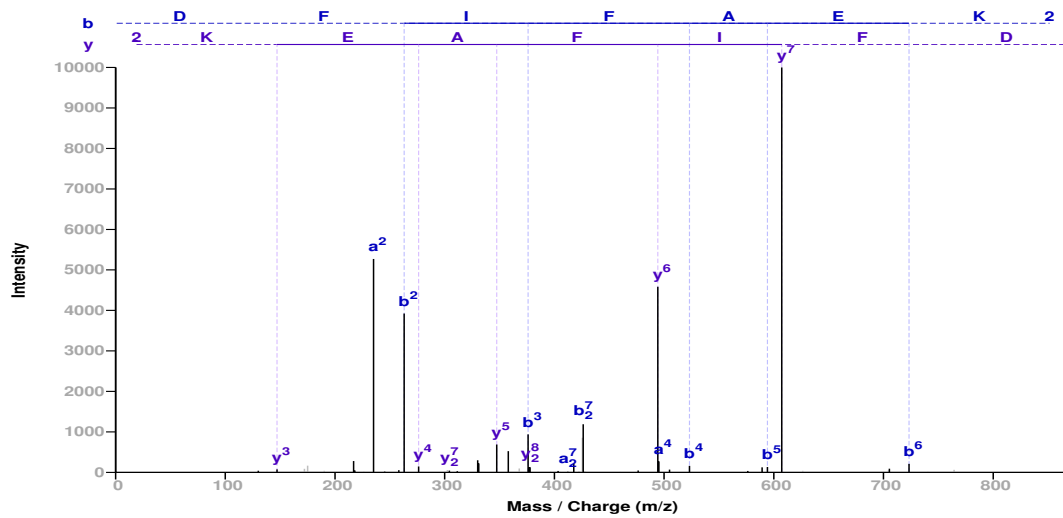

yeast0\_Scan\_Number\_1747 Precursor m/z: 394.716 cosine: 0.868  $\alpha$ : 0.208

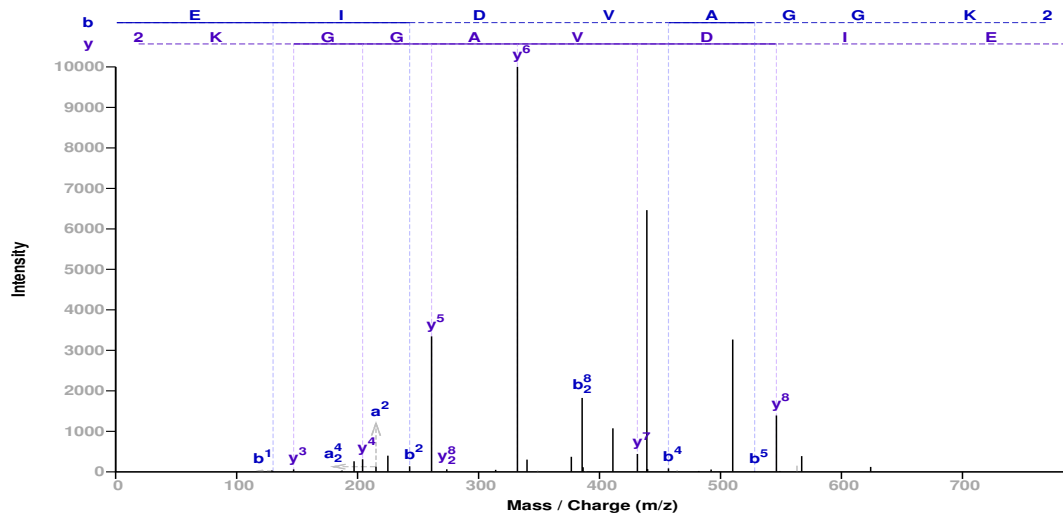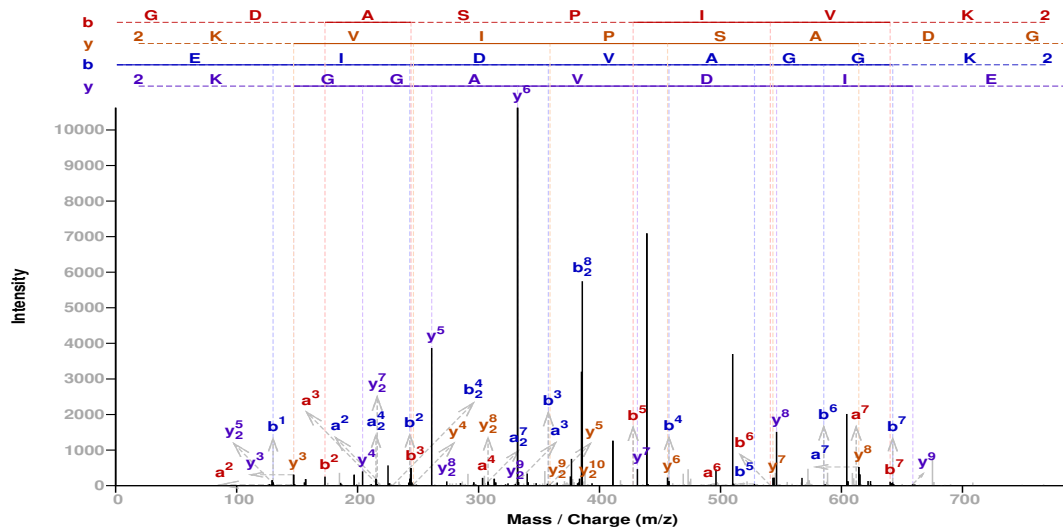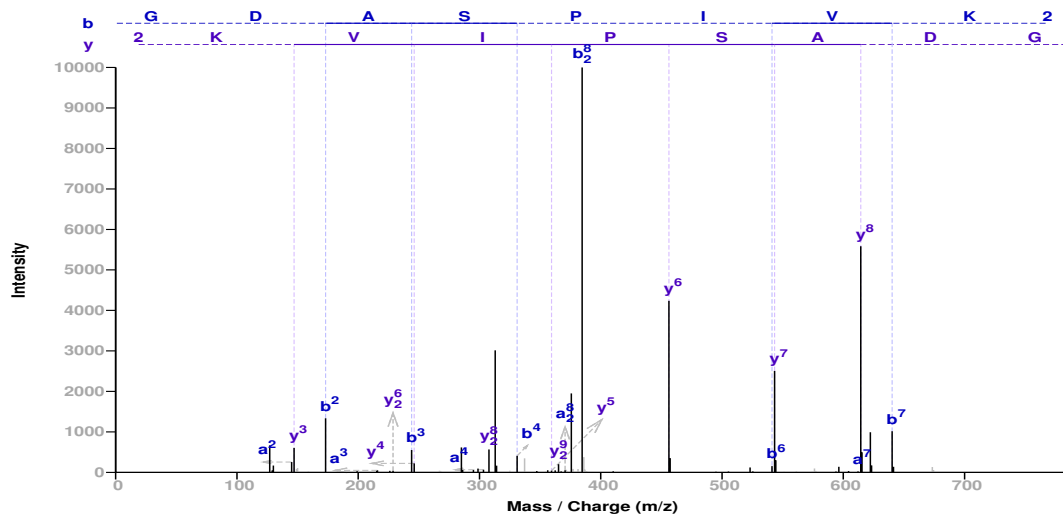

yeast0.Scan\_Number\_10464 Precursor m/z: 675.377 cosine: 0.801  $\alpha$ : 0.207

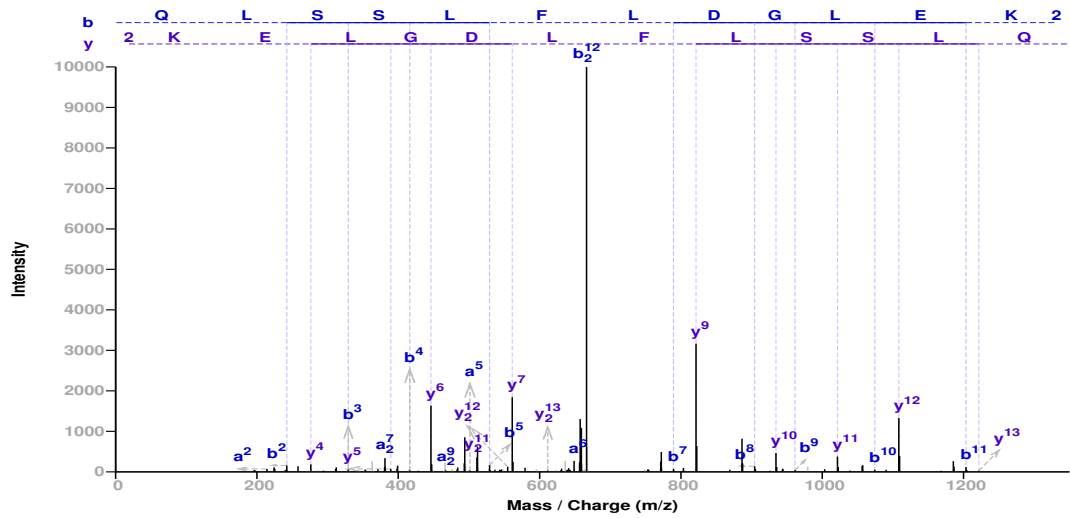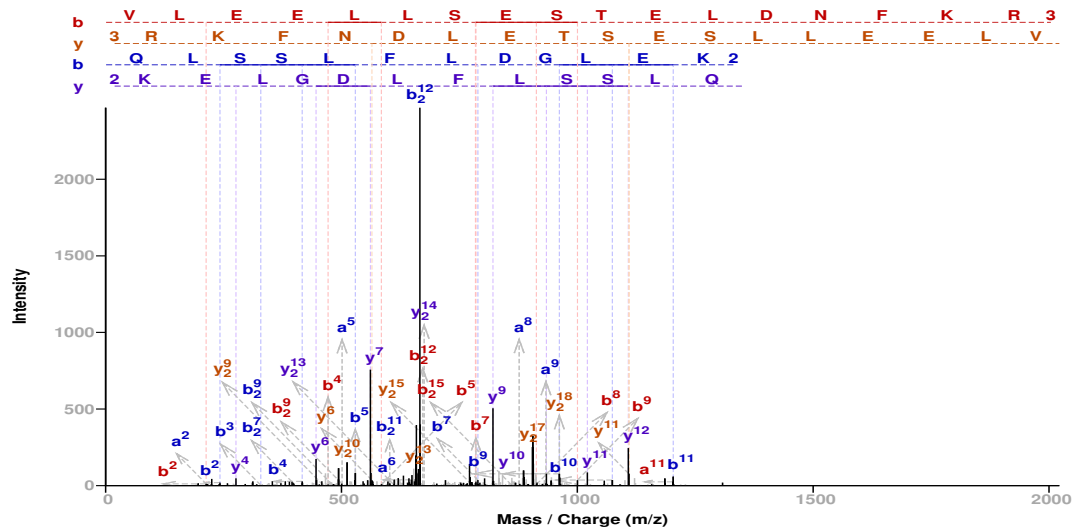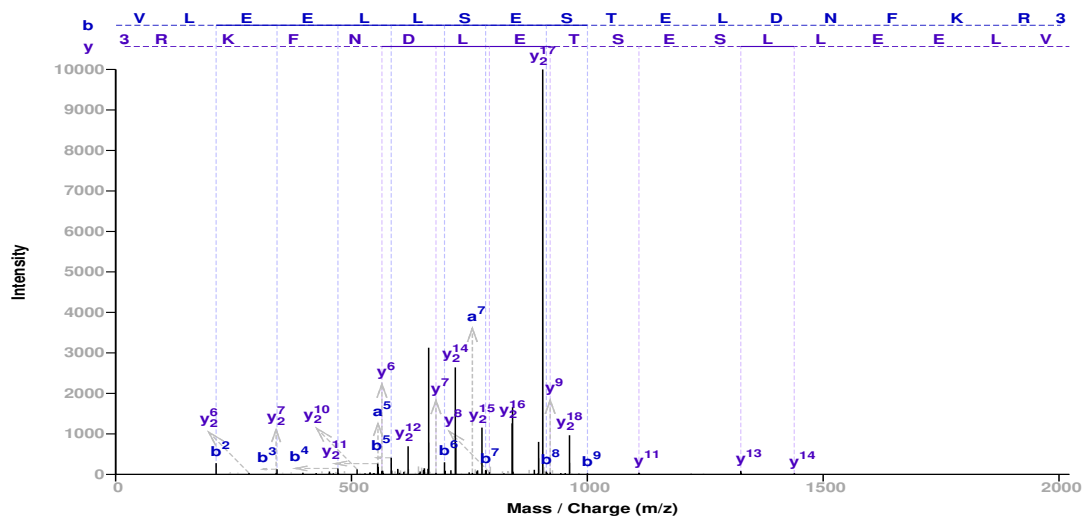



yeast0\_Scan\_Number\_4038 Precursor m/z: 391.548 cosine: 0.793  $\alpha$ : 0.207

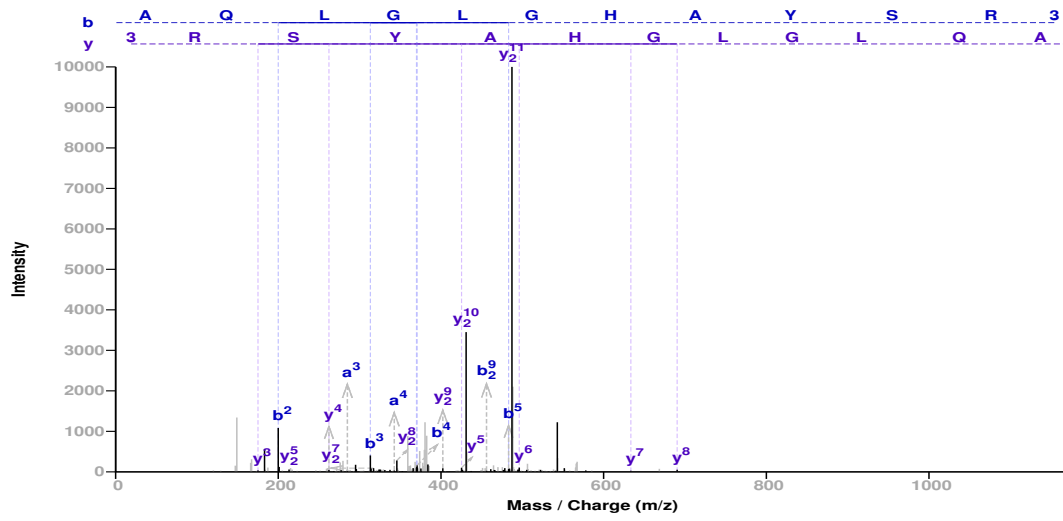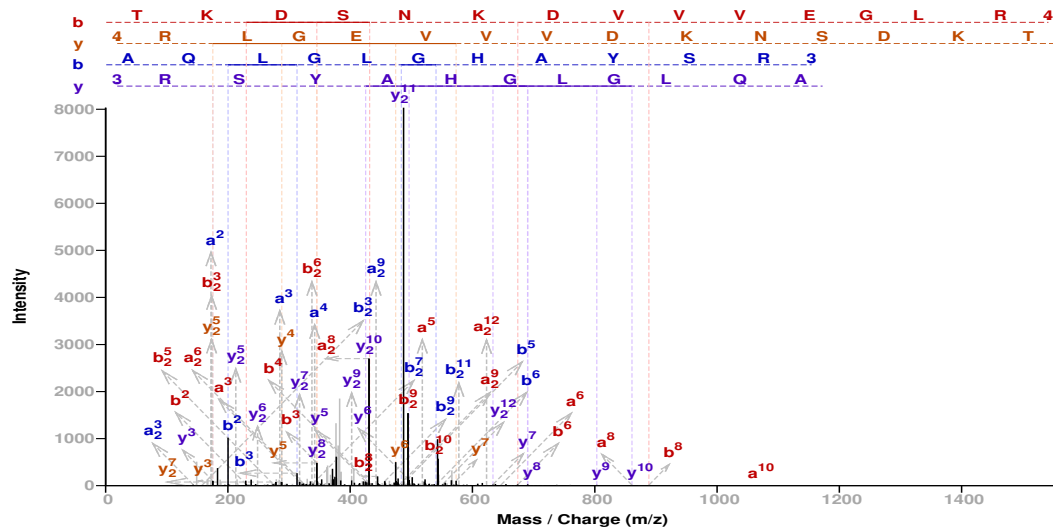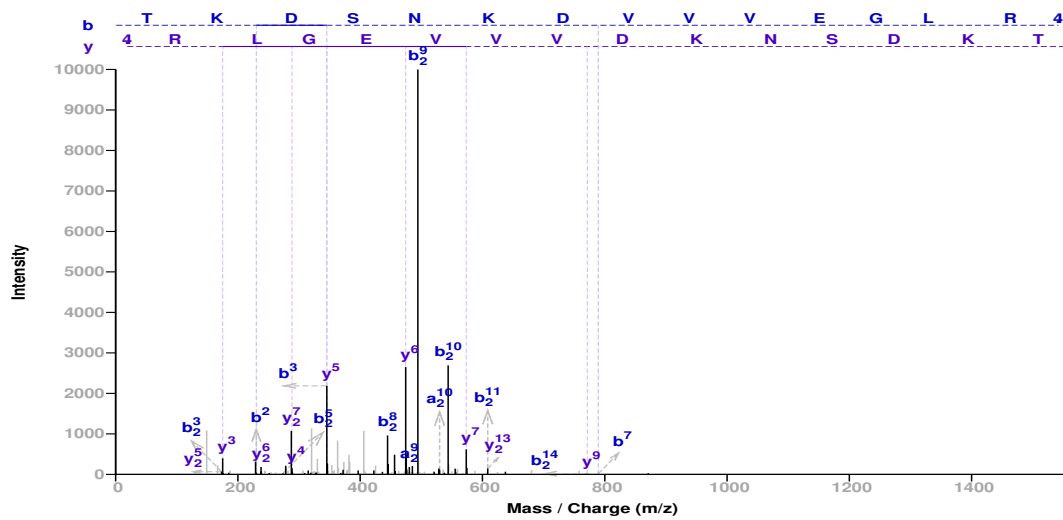

yeast0.Scan\_Number\_7779 Precursor m/z: 541.956 cosine: 0.819  $\alpha$ : 0.204

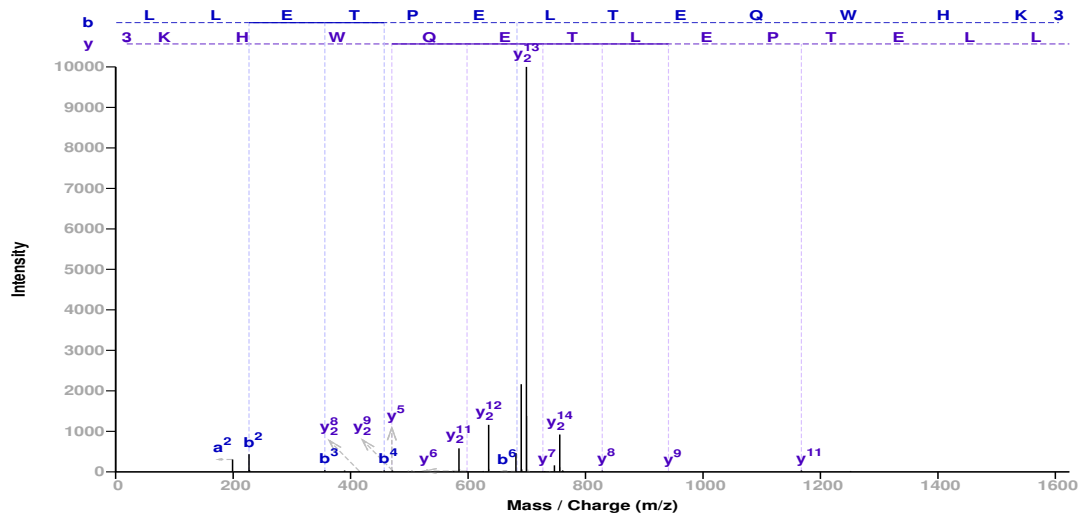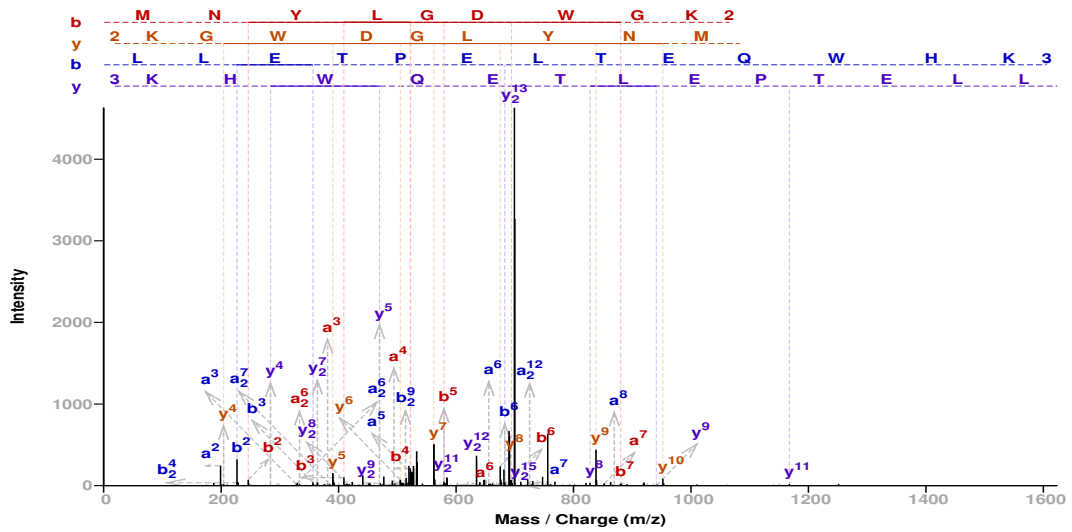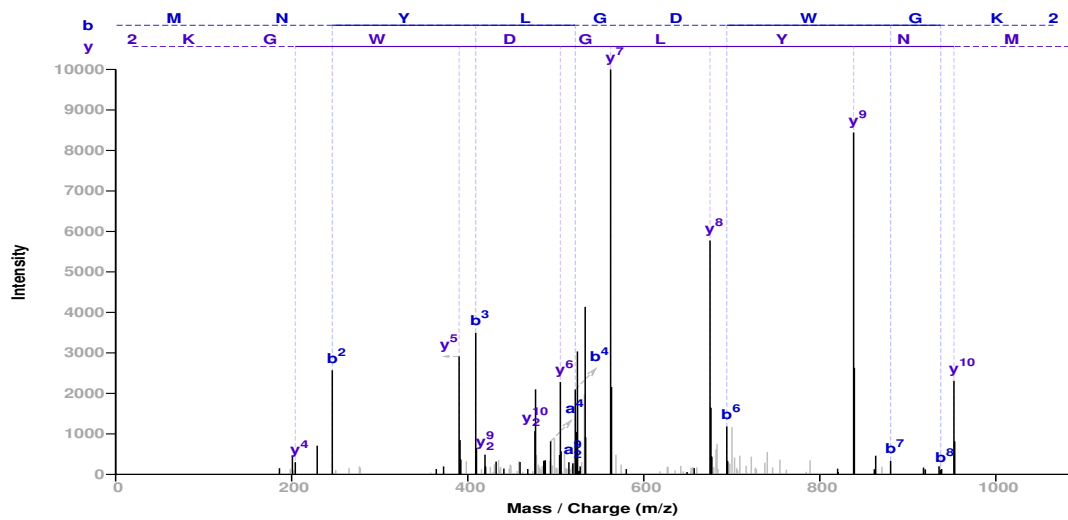



yeast0.Scan\_Number\_5107 Precursor m/z: 393.743 cosine: 0.772  $\alpha$ : 0.201

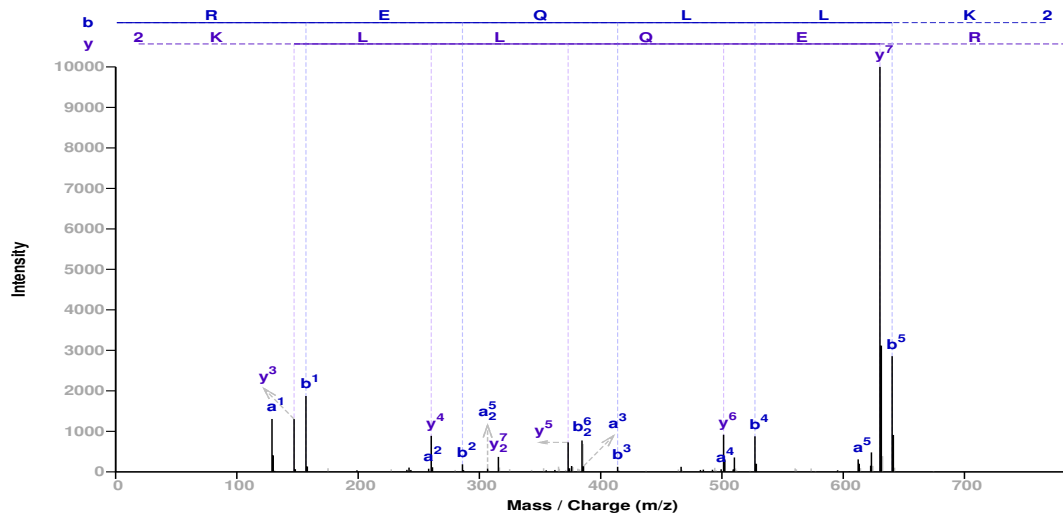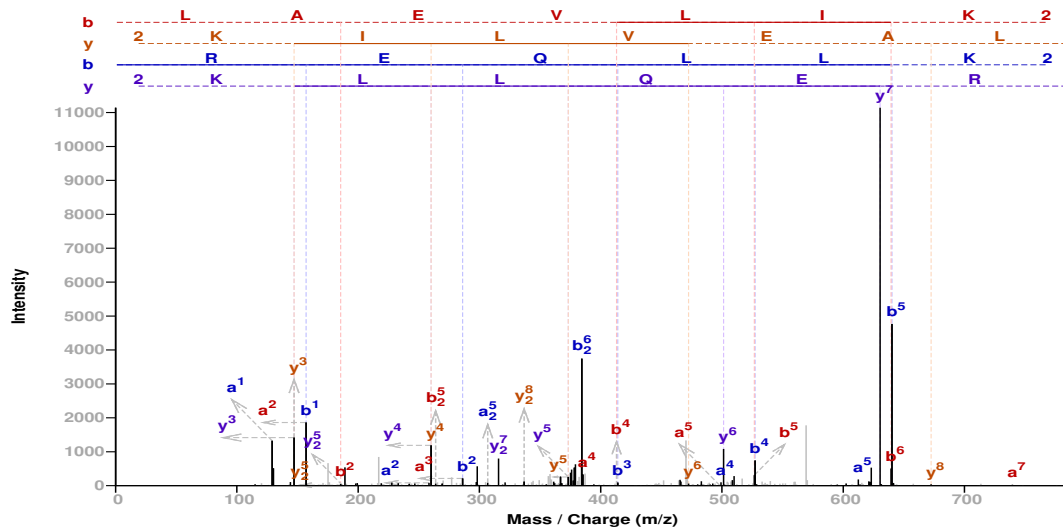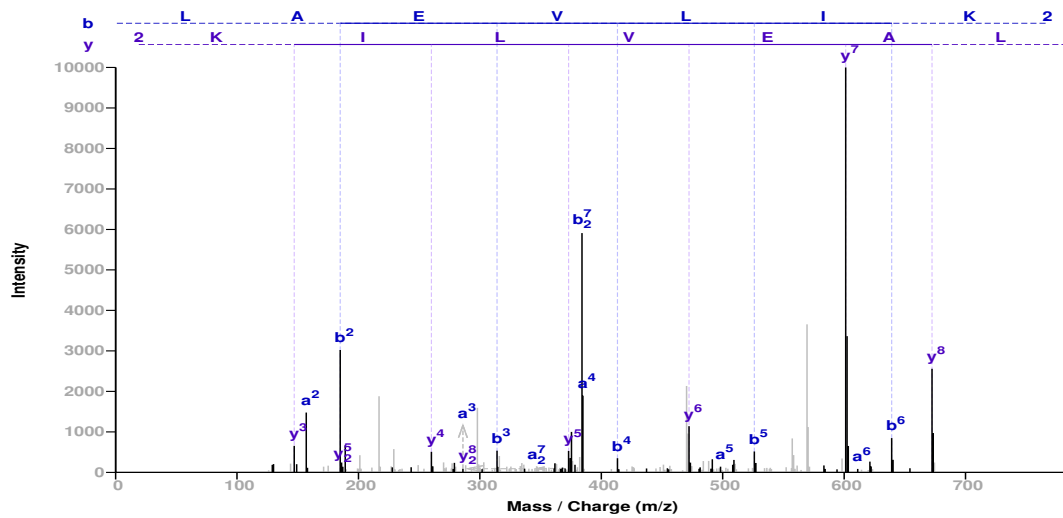

yeast0\_Scan\_Number\_3194 Precursor m/z: 529.317 cosine: 0.795  $\alpha$ : 0.198

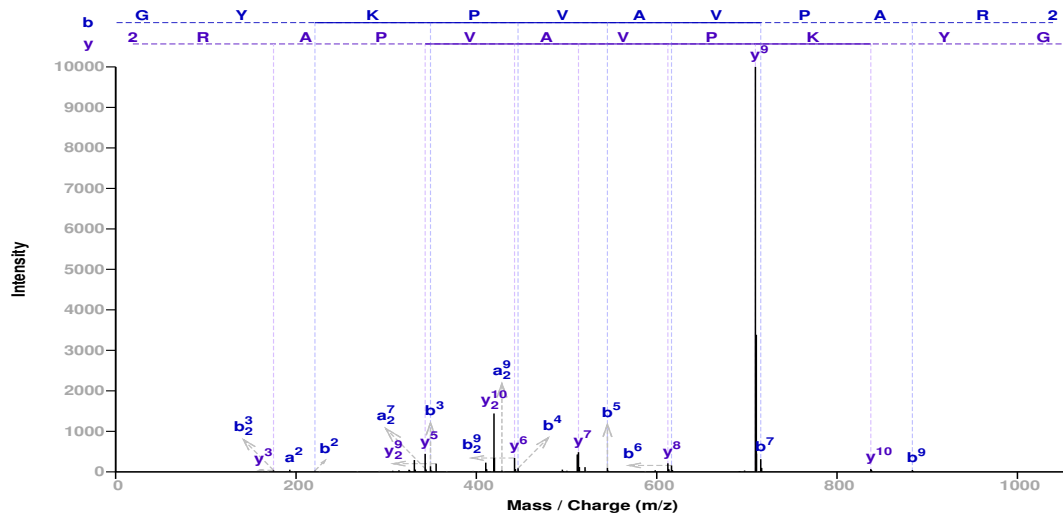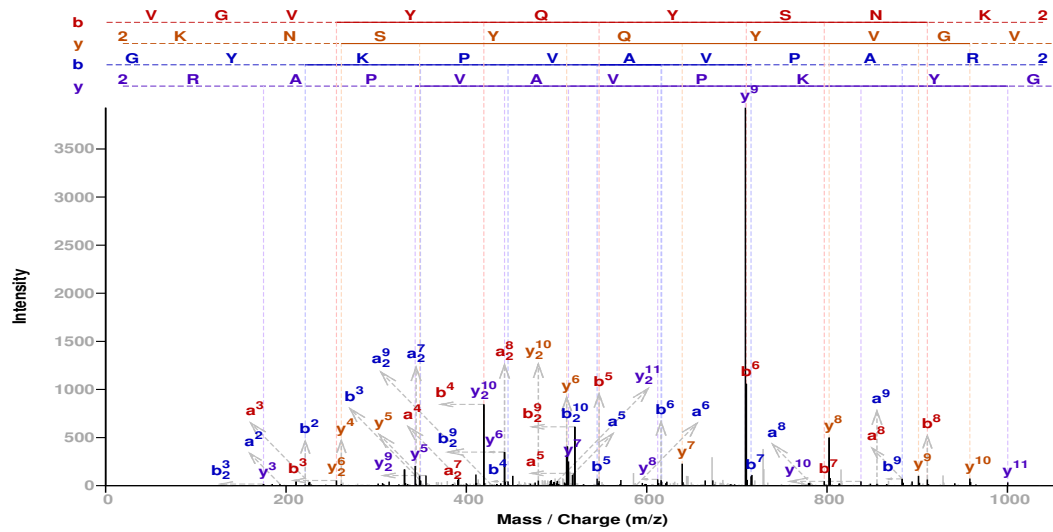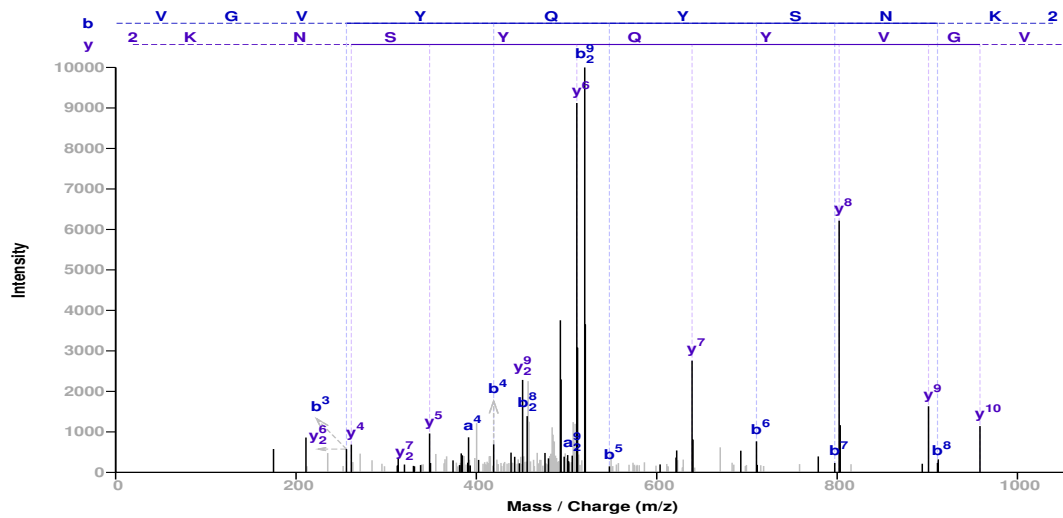

yeast0\_Scan\_Number\_3196 Precursor m/z: 464.800 cosine: 0.856  $\alpha$ : 0.196

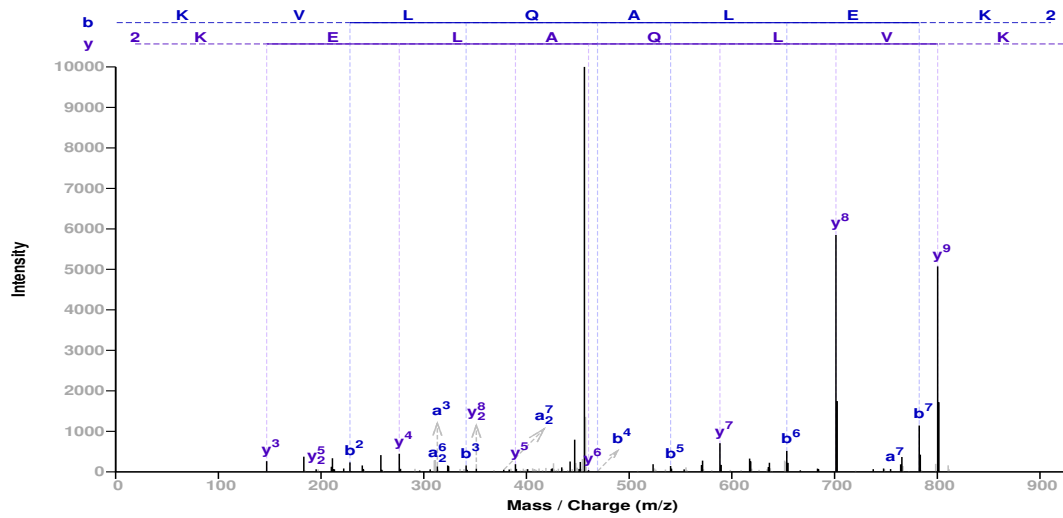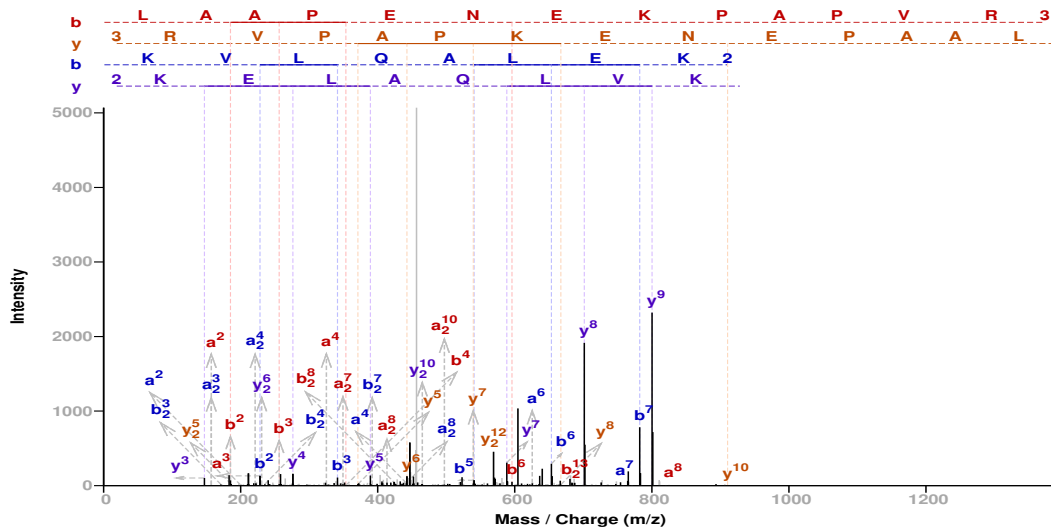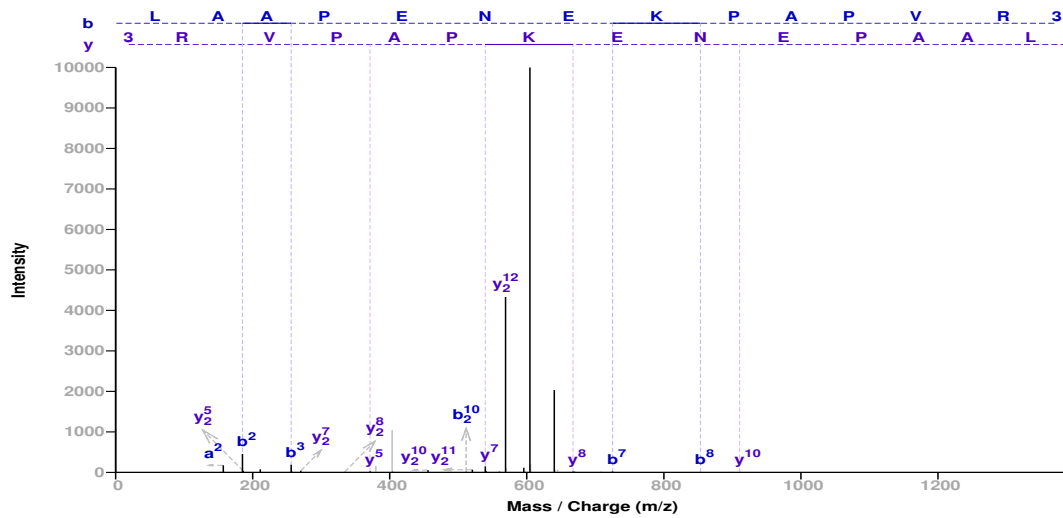









yeast0\_Scan\_Number\_6337 Precursor m/z: 592.819 cosine: 0.886  $\alpha$ : 0.189

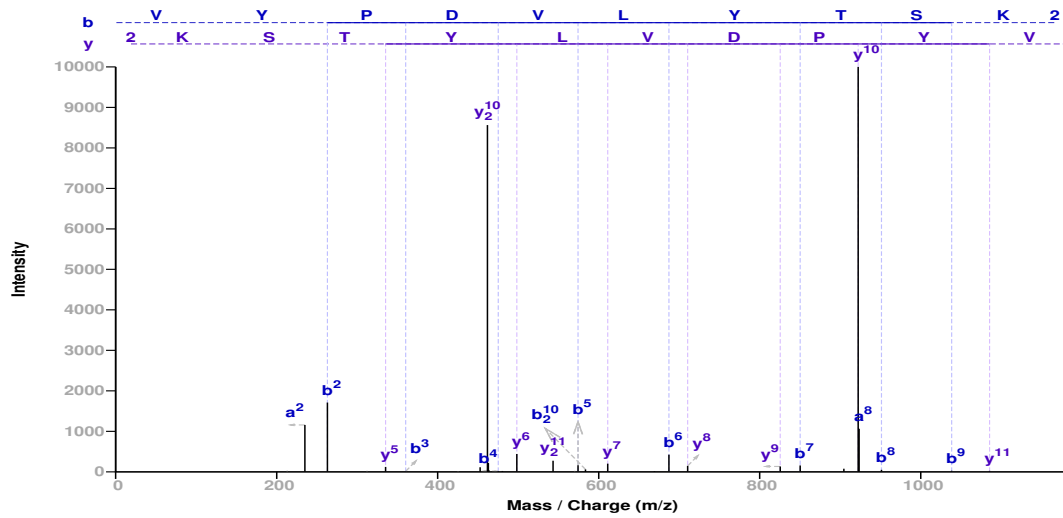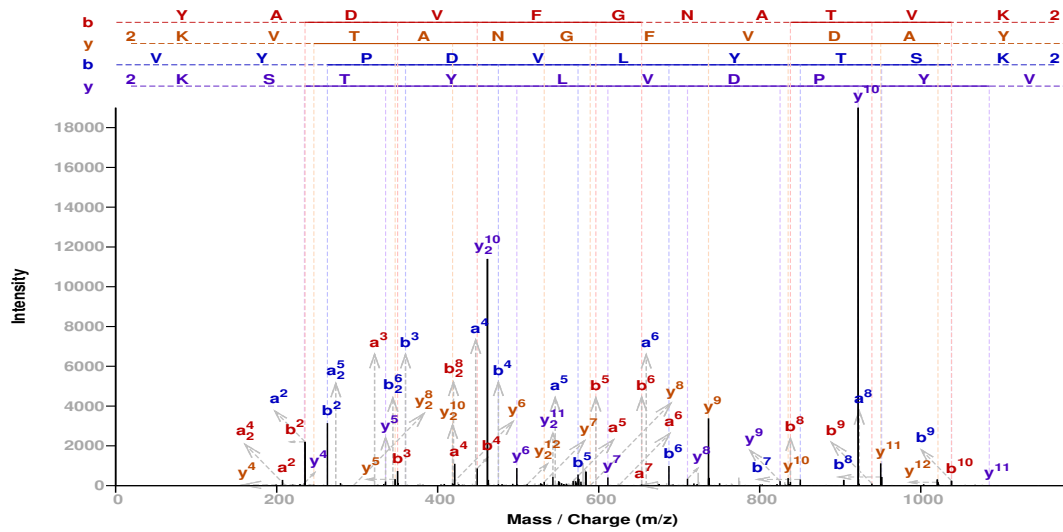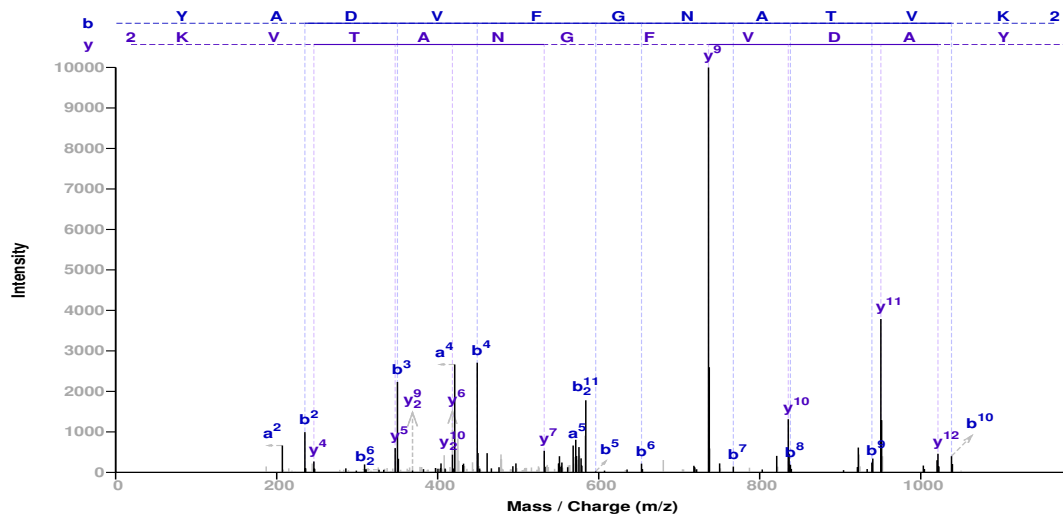

yeast0\_Scan\_Number\_2252 Precursor m/z: 374.876 cosine: 0.765  $\alpha$ : 0.188

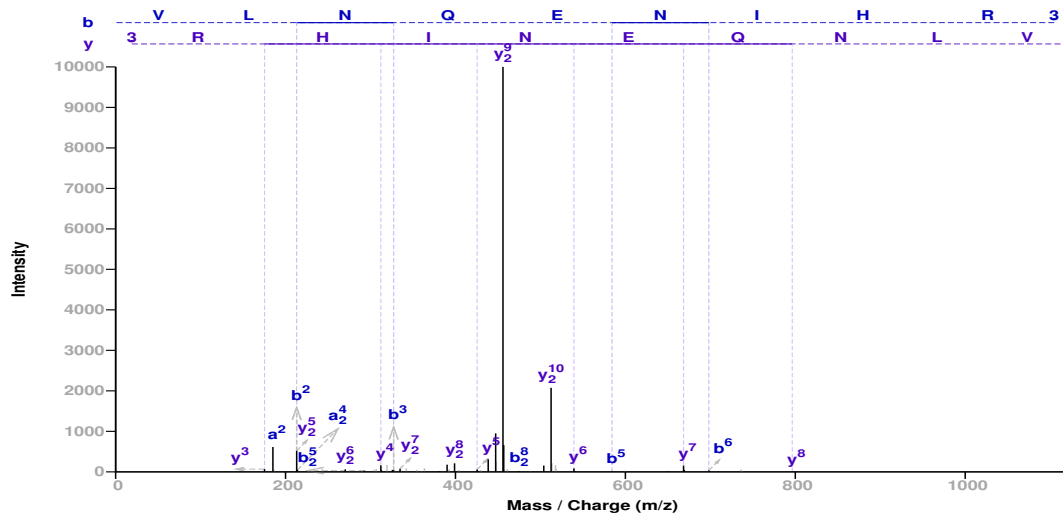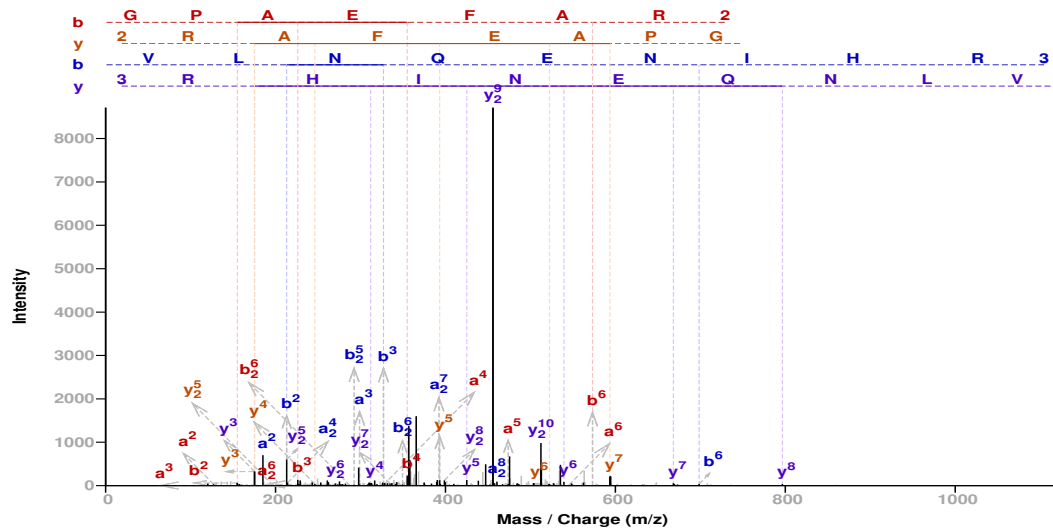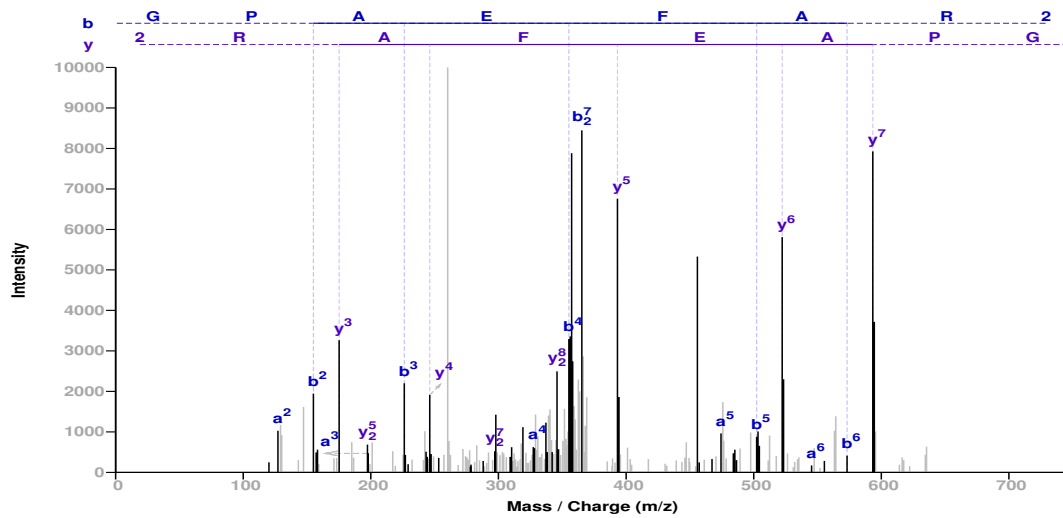

yeast0\_Scan\_Number\_6379 Precursor m/z: 442.586 cosine: 0.760  $\alpha$ : 0.188

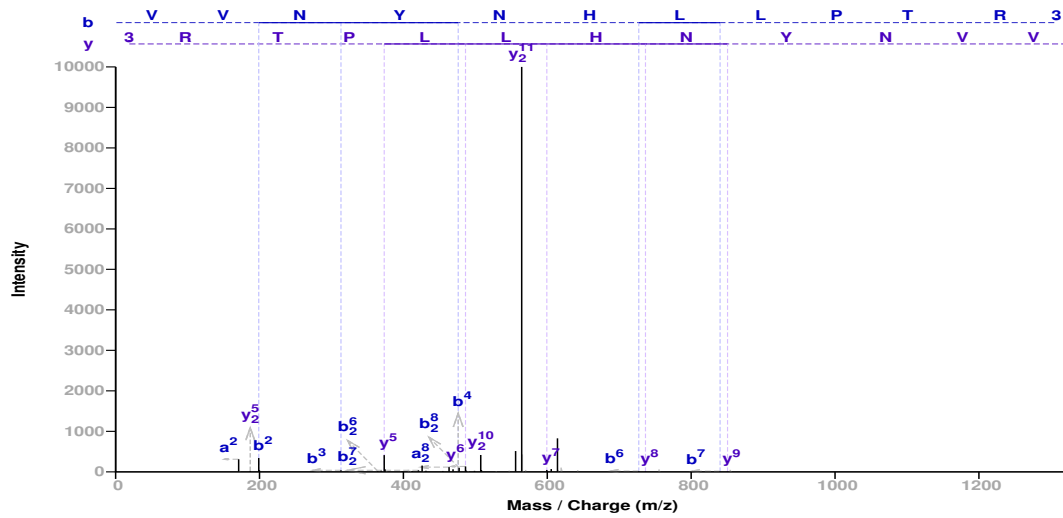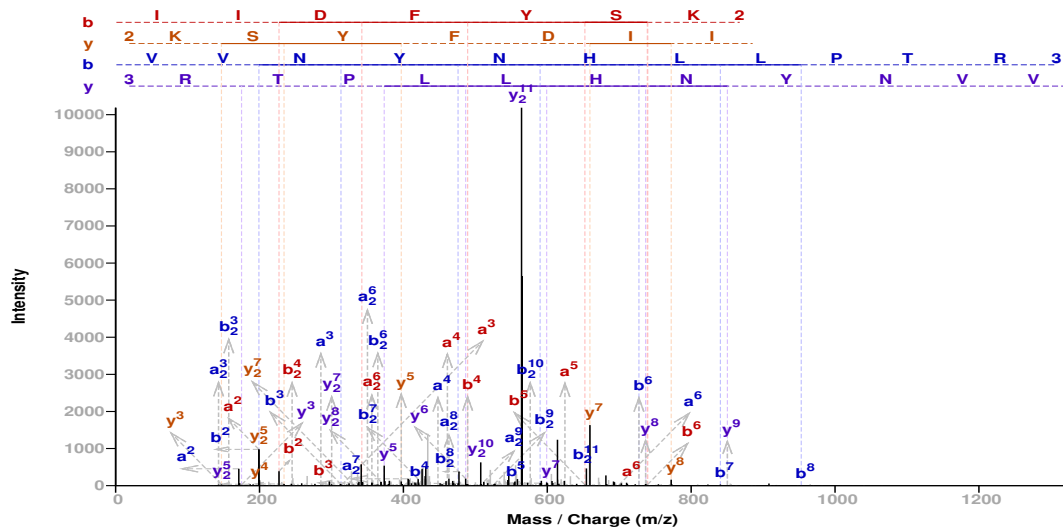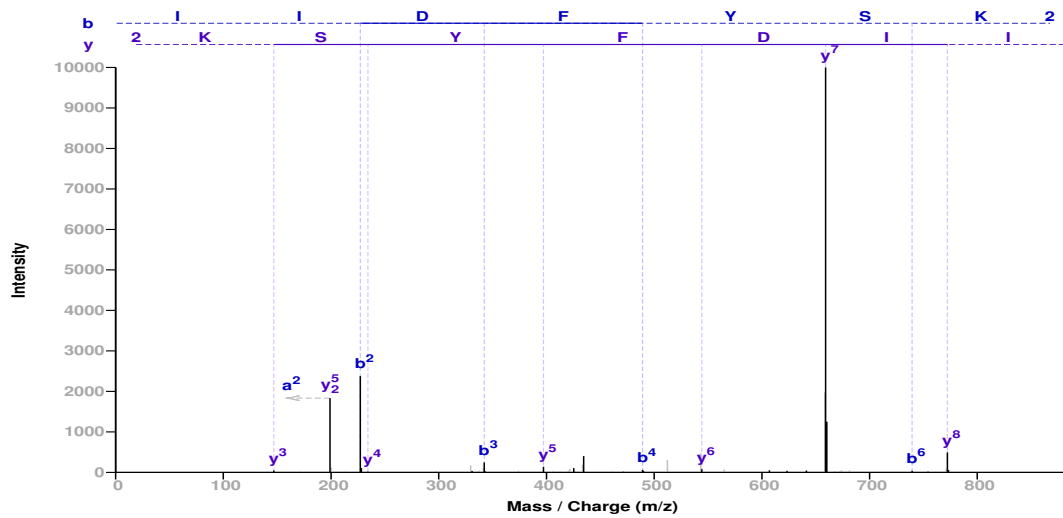

yeast0\_Scan\_Number\_5215 Precursor m/z: 436.781 cosine: 0.787  $\alpha$ : 0.187

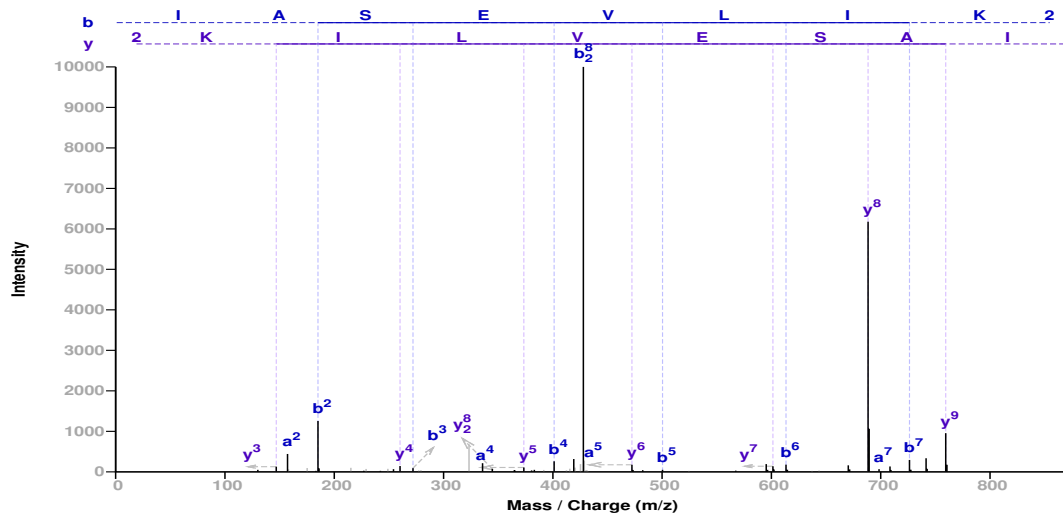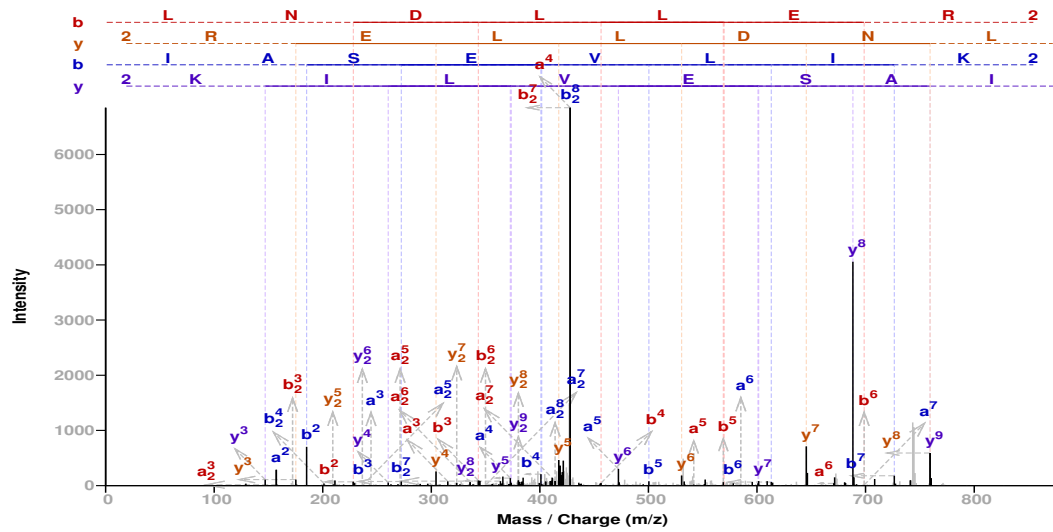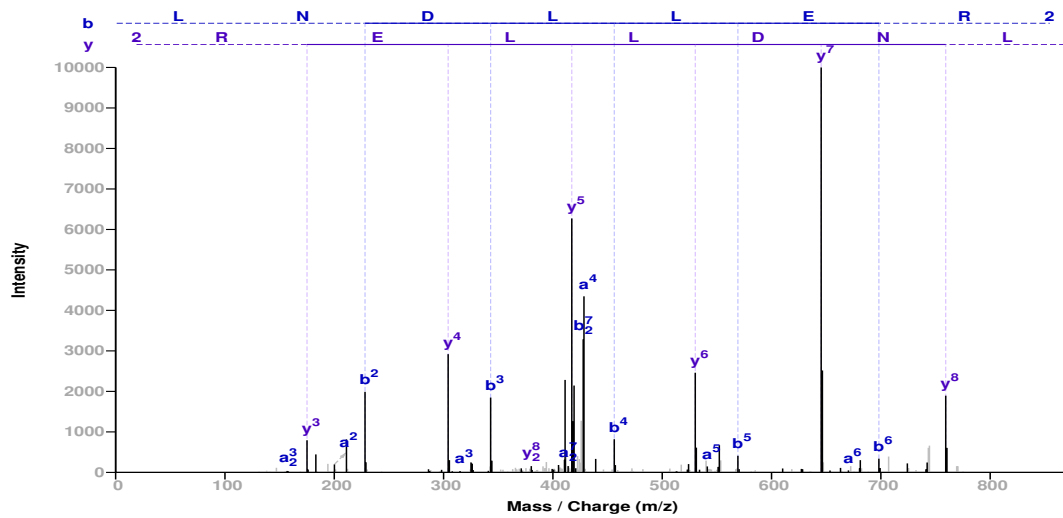

yeast0\_Scan\_Number\_4260 Precursor m/z: 365.238 cosine: 0.823  $\alpha$ : 0.185

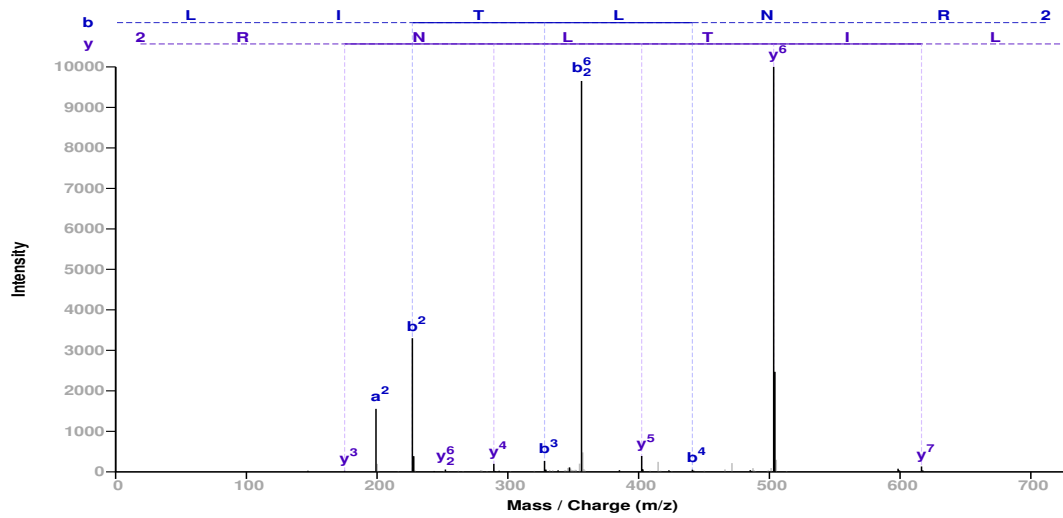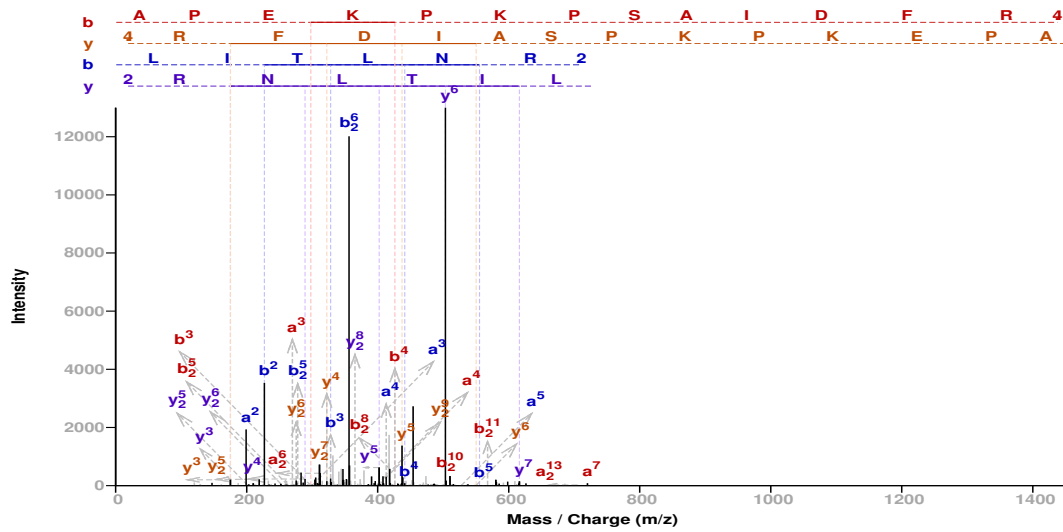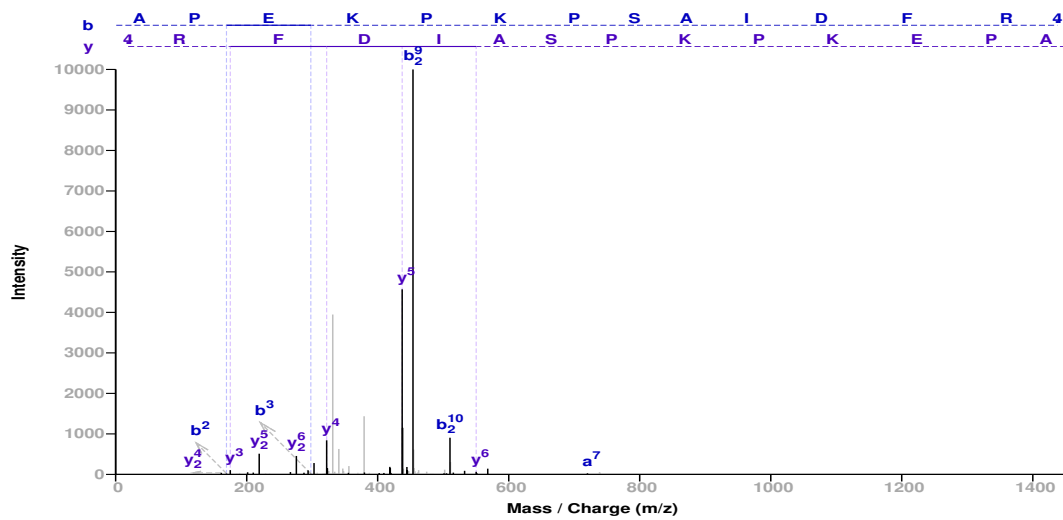

yeast0\_Scan\_Number\_8079 Precursor m/z: 635.367 cosine: 0.810  $\alpha$ : 0.183

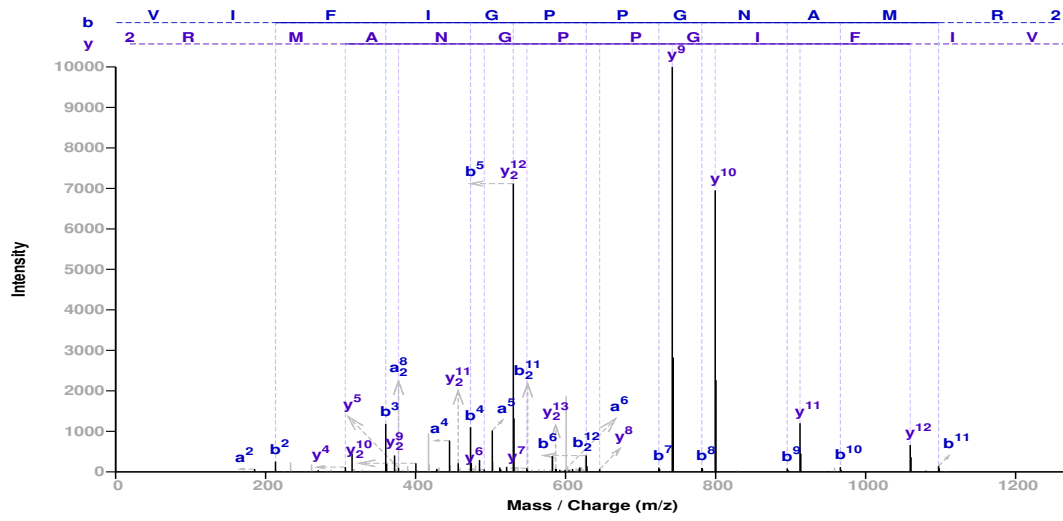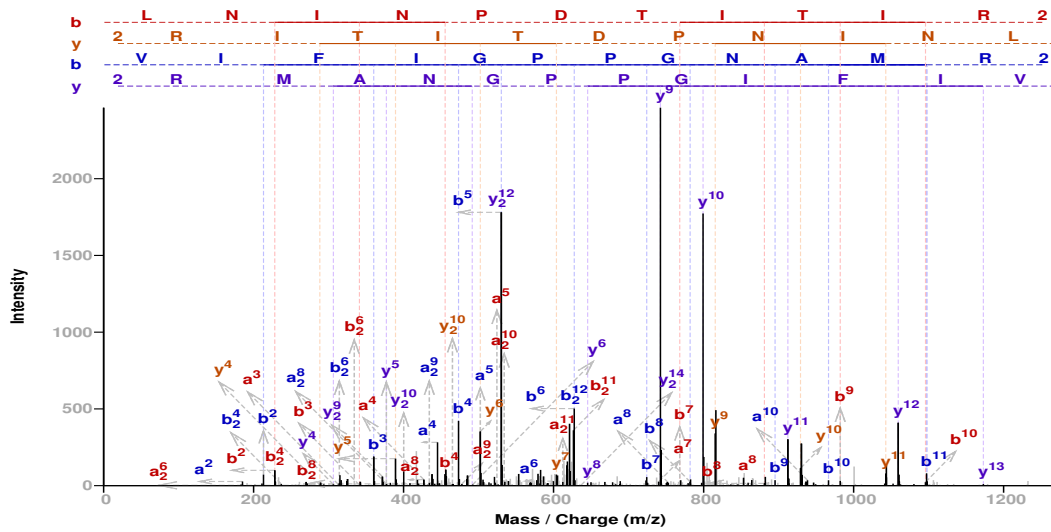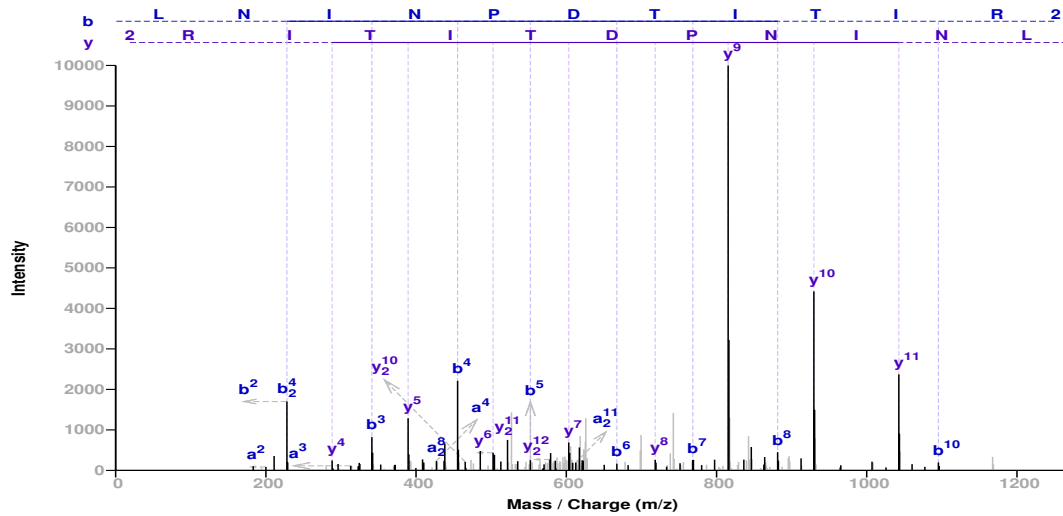

yeast0.Scan\_Number\_10753 Precursor m/z: 696.393 cosine: 0.842  $\alpha$ : 0.178

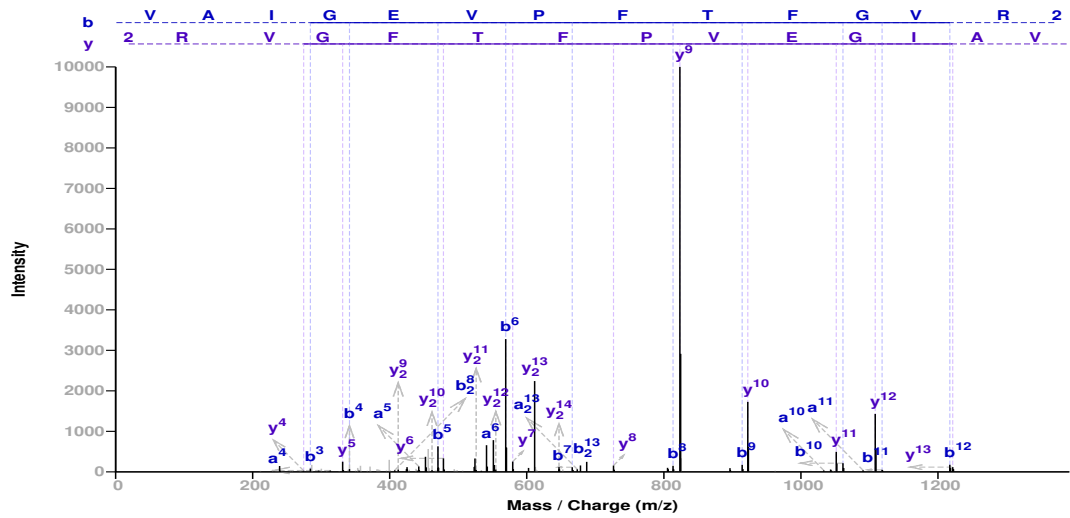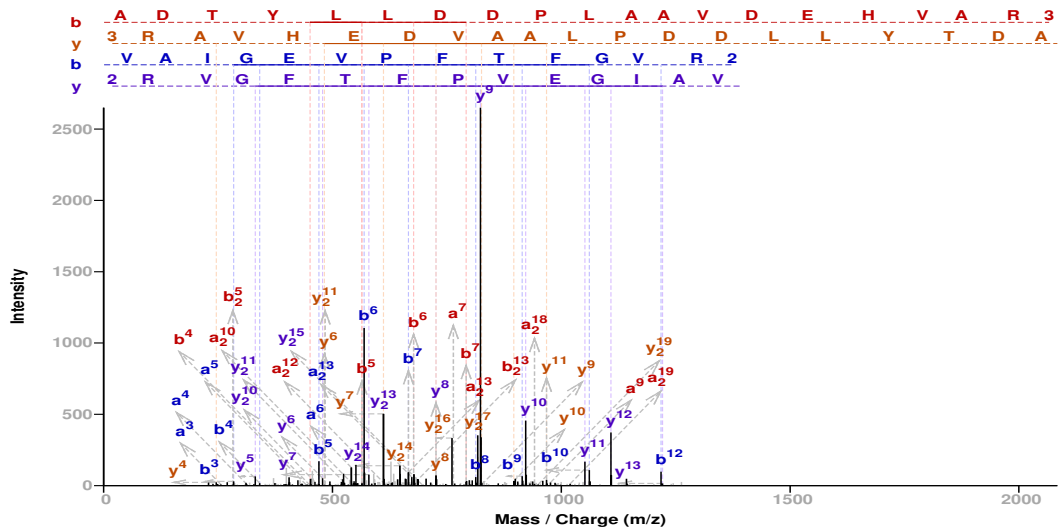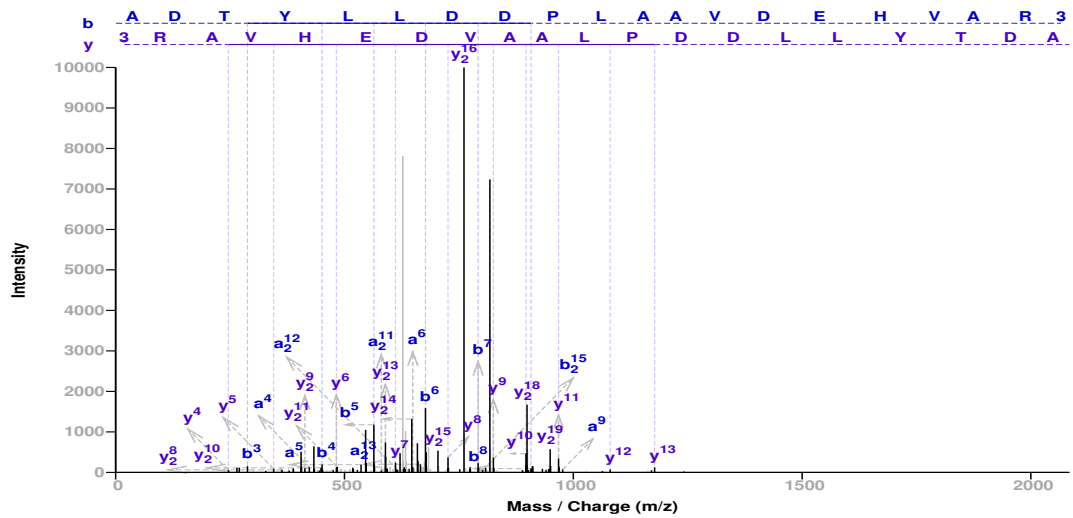



yeast0\_Scan\_Number\_6463 Precursor m/z: 509.269 cosine: 0.794  $\alpha$ : 0.160

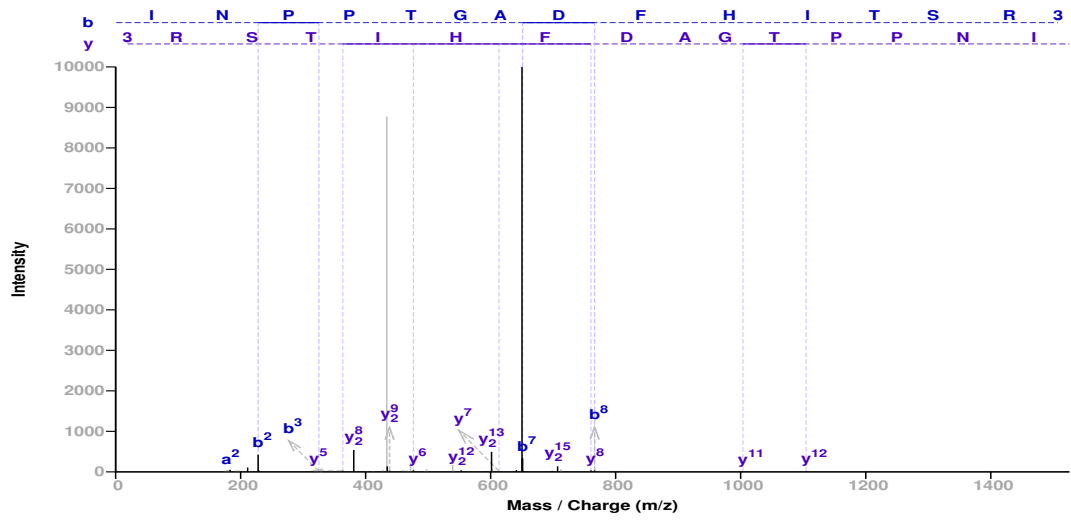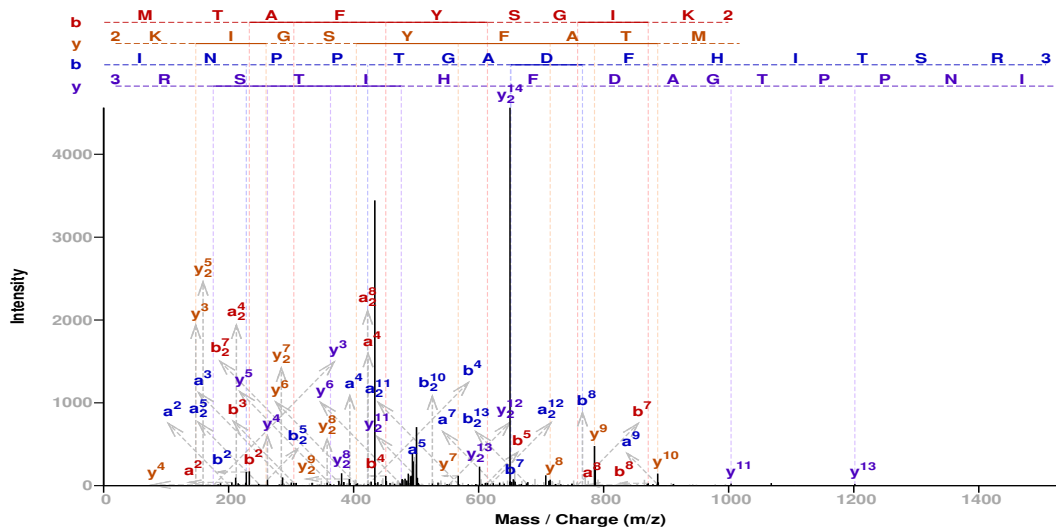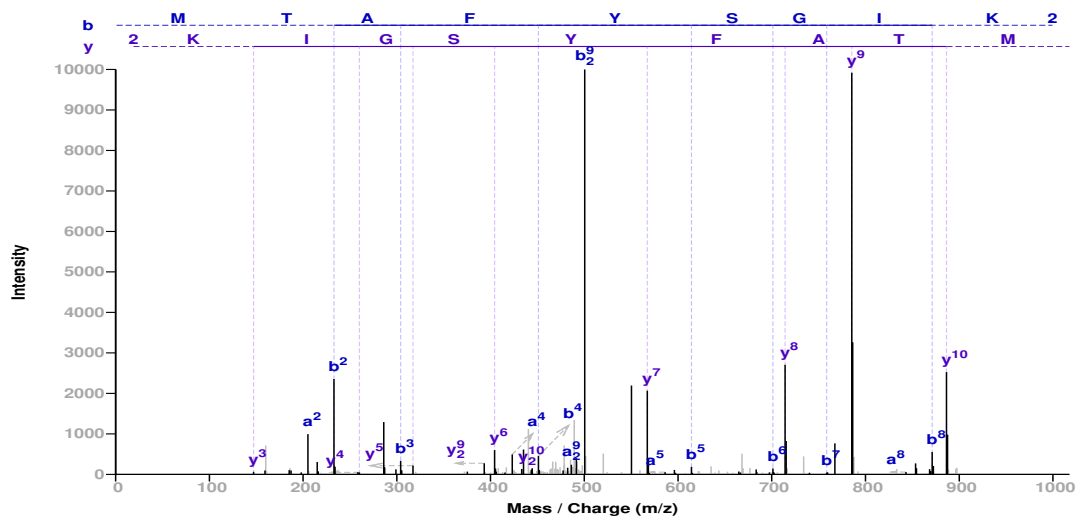

yeast0\_Scan\_Number\_8256 Precursor m/z: 422.772 cosine: 0.916  $\alpha$ : 0.156

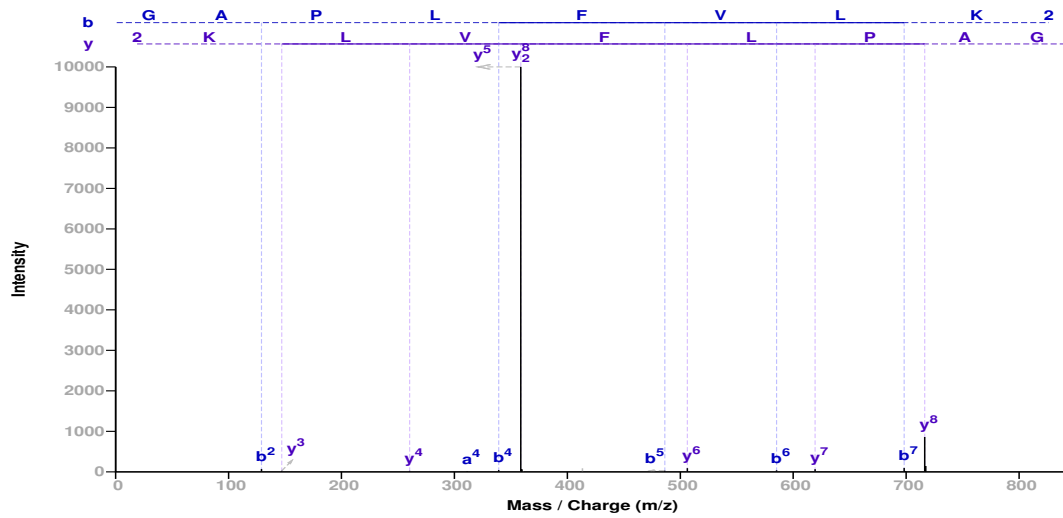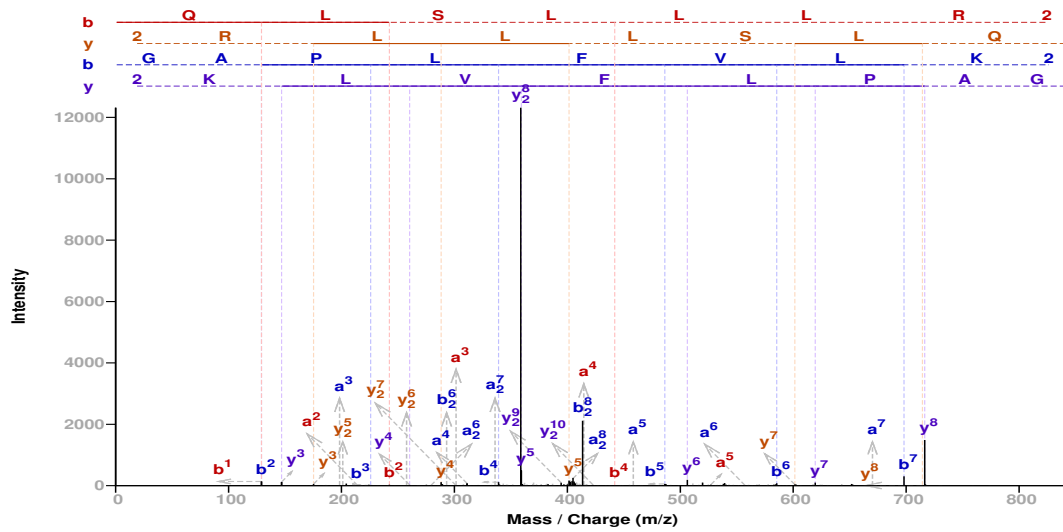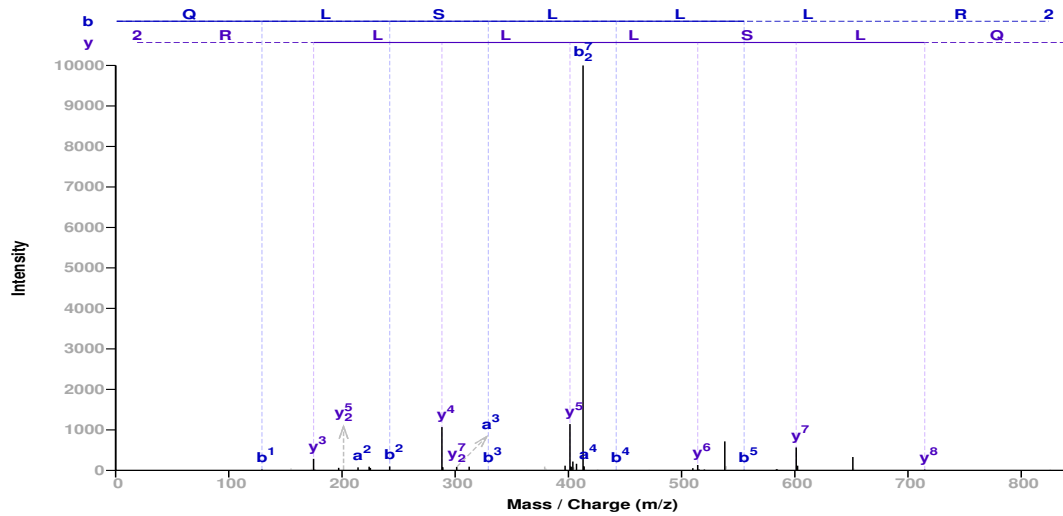

yeast0\_Scan\_Number\_3615 Precursor m/z: 352.206 cosine: 0.856  $\alpha$ : 0.153

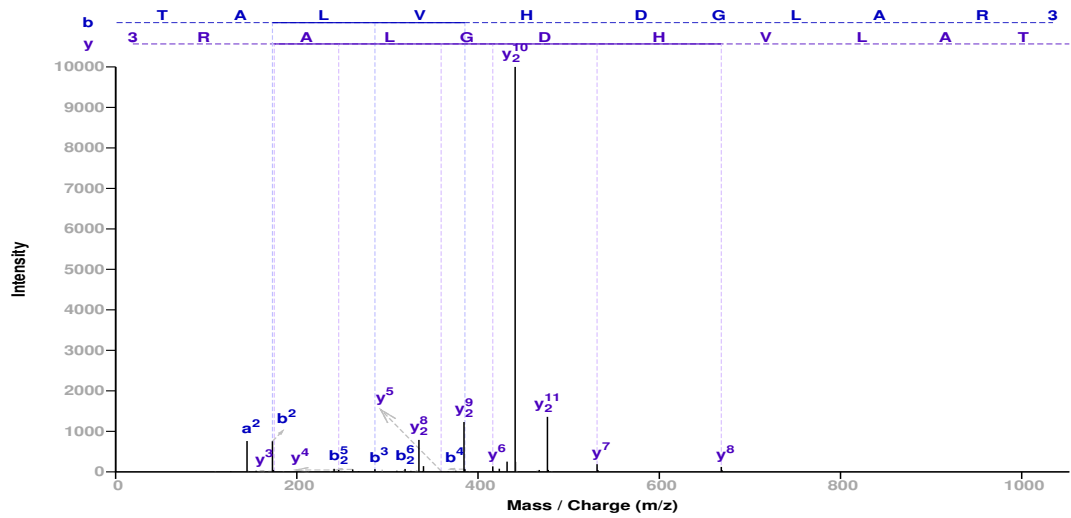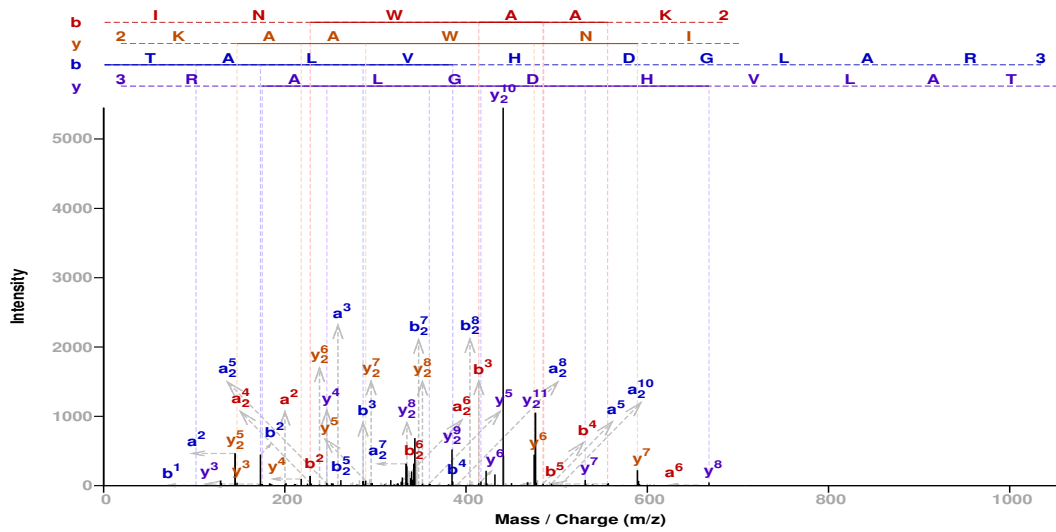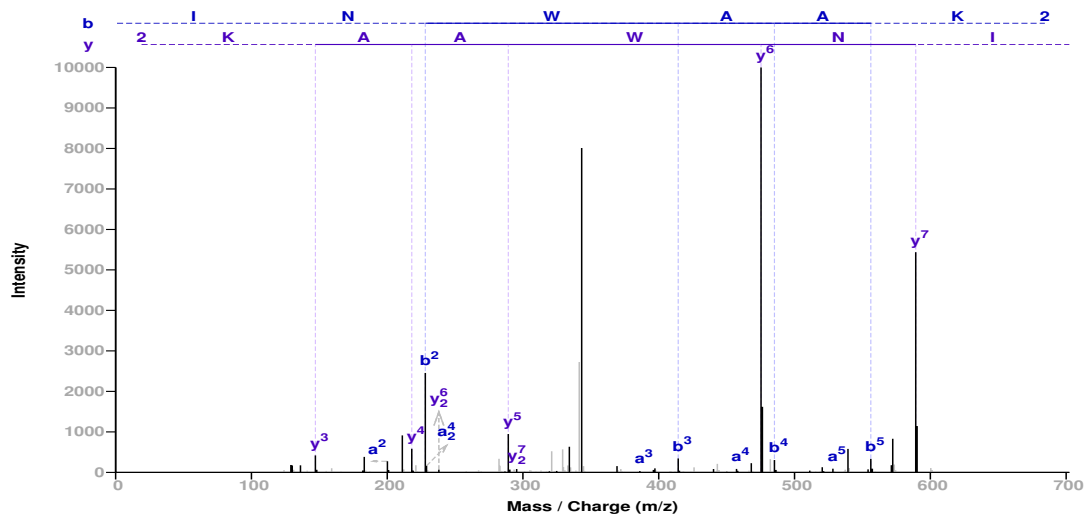

yeast0\_Scan\_Number\_6522 Precursor m/z: 538.932 cosine: 0.801  $\alpha$ : 0.149

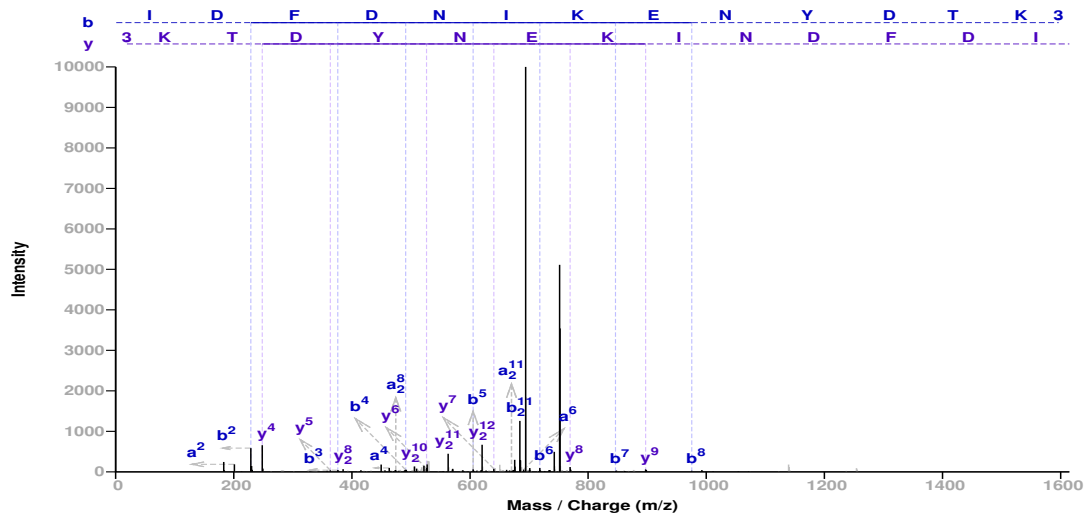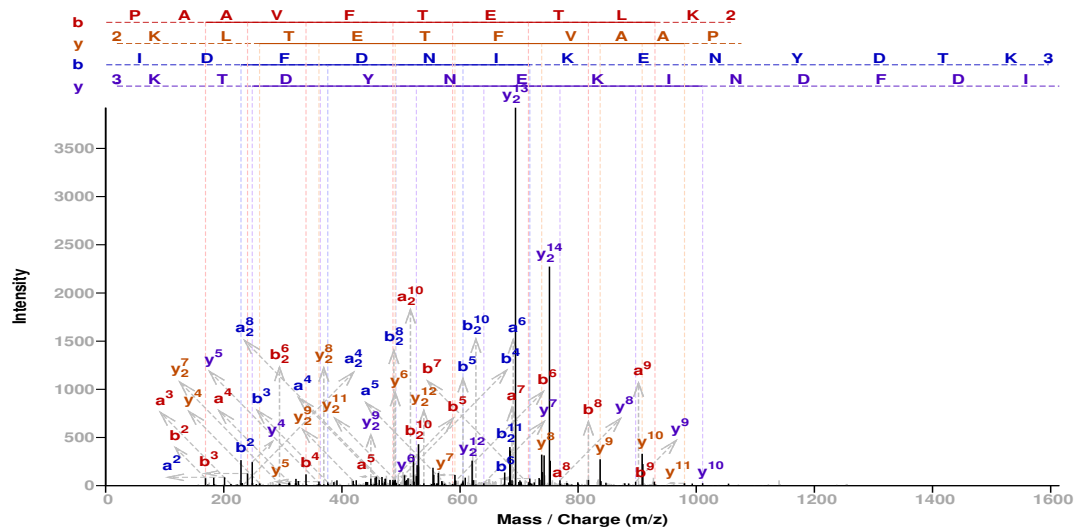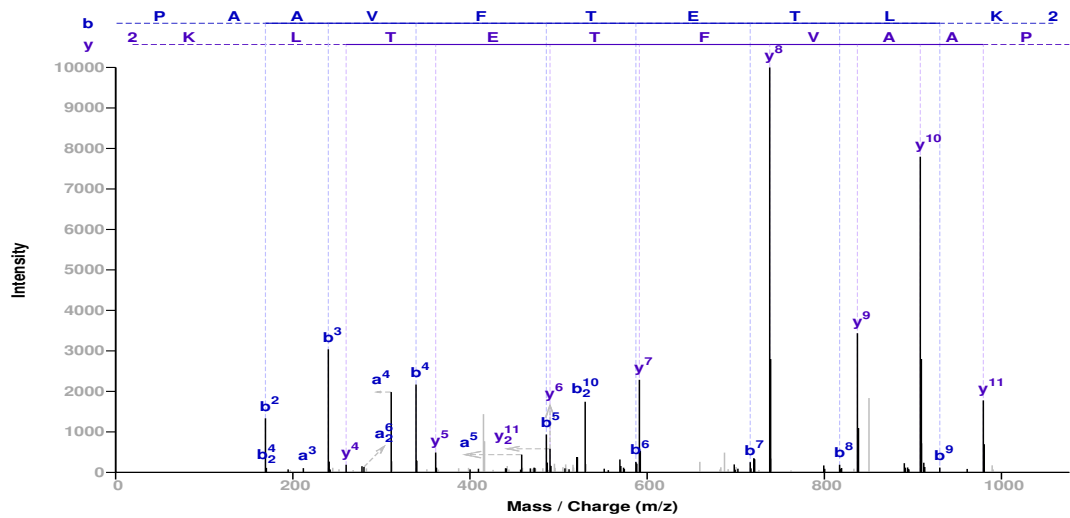

yeast0.Scan\_Number\_4620 Precursor m/z: 390.195 cosine: 0.773  $\alpha$ : 0.146

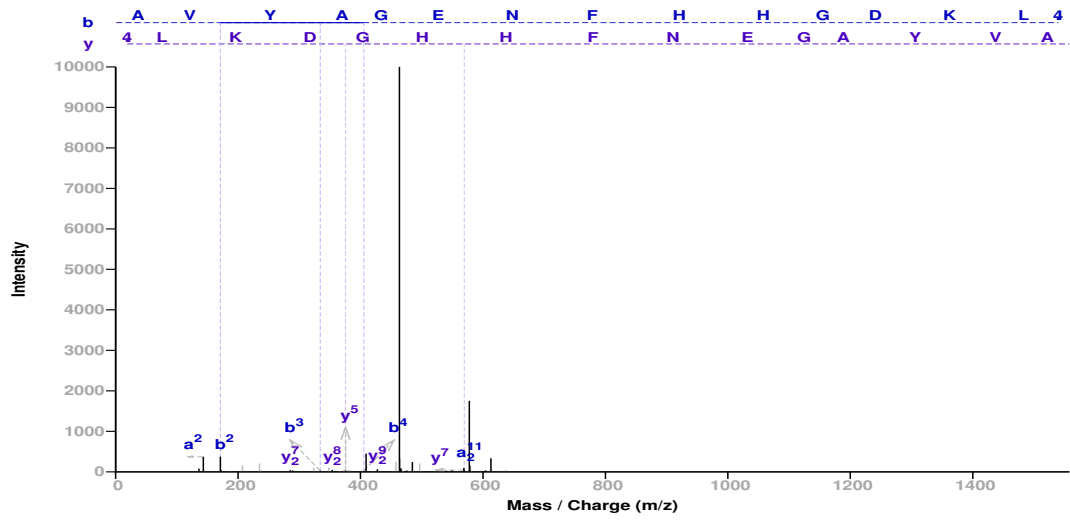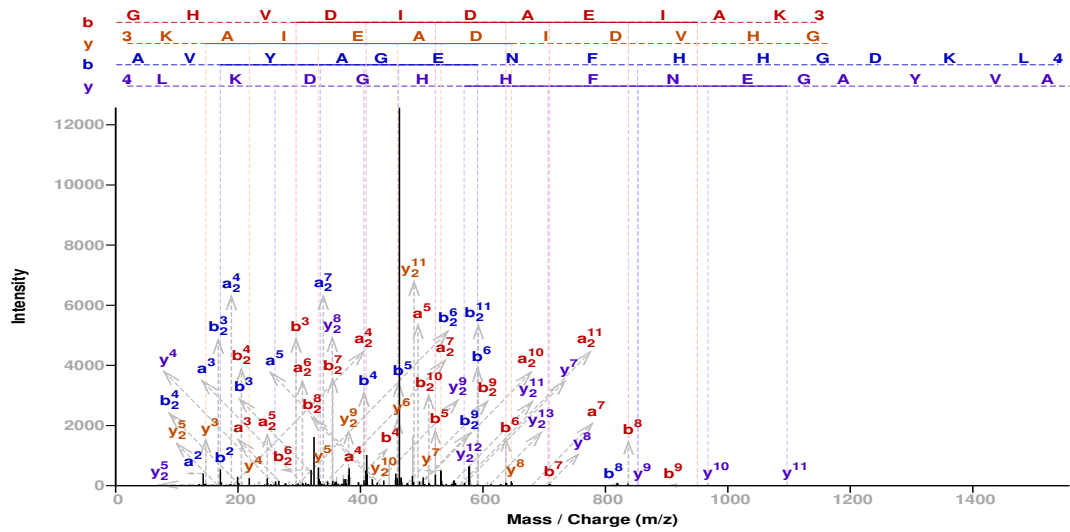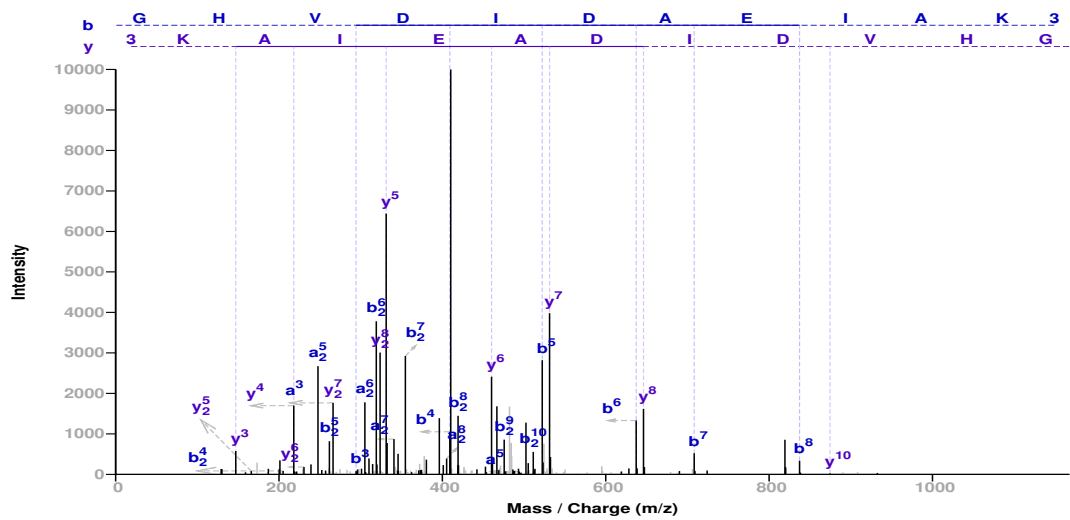

yeast0\_Scan\_Number\_2434 Precursor m/z: 387.233 cosine: 0.893  $\alpha$ : 0.142

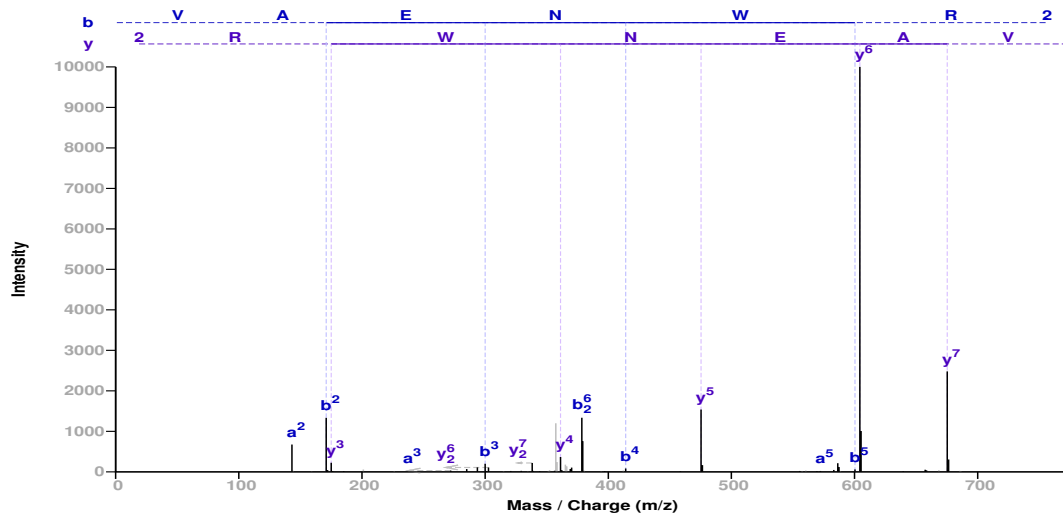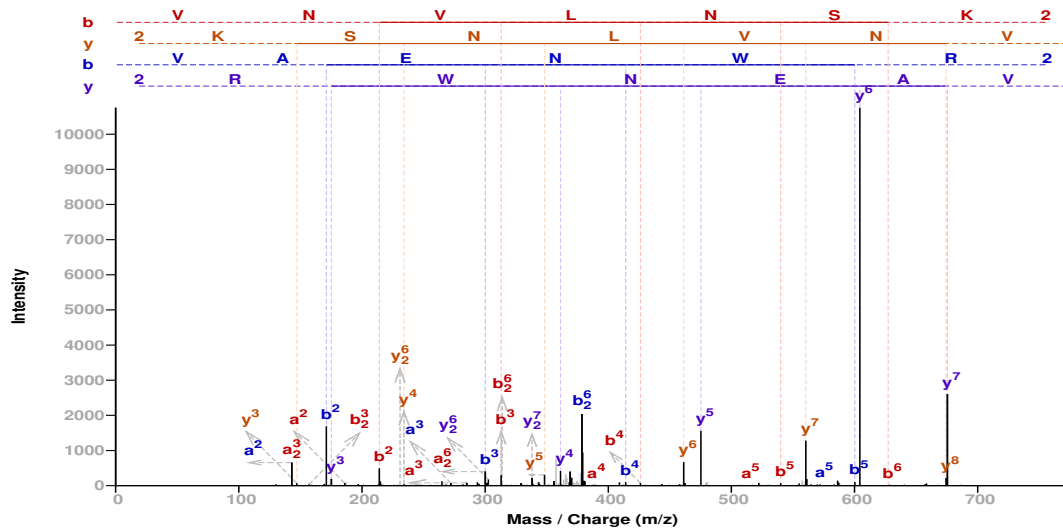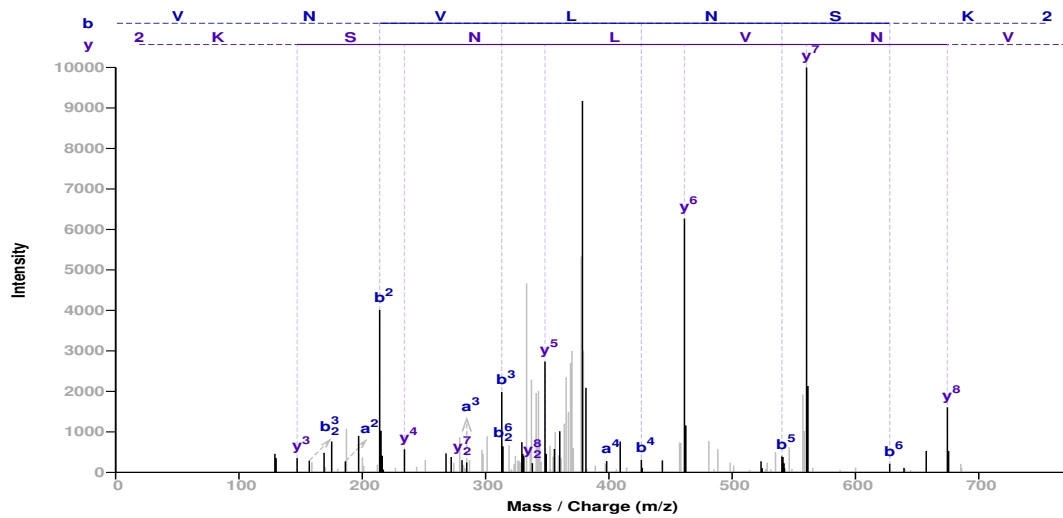

yeast0\_Scan\_Number\_3424 Precursor m/z: 475.276 cosine: 0.896  $\alpha$ : 0.139

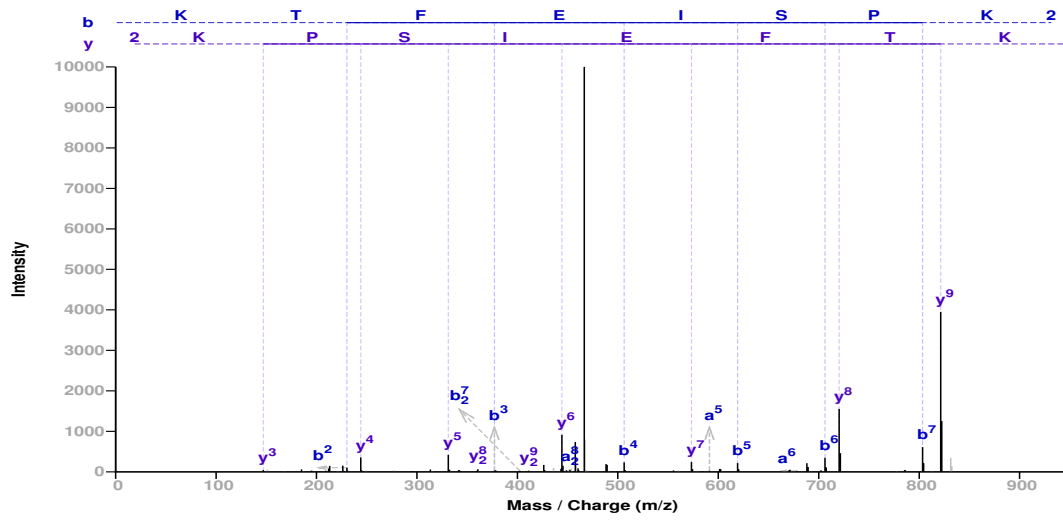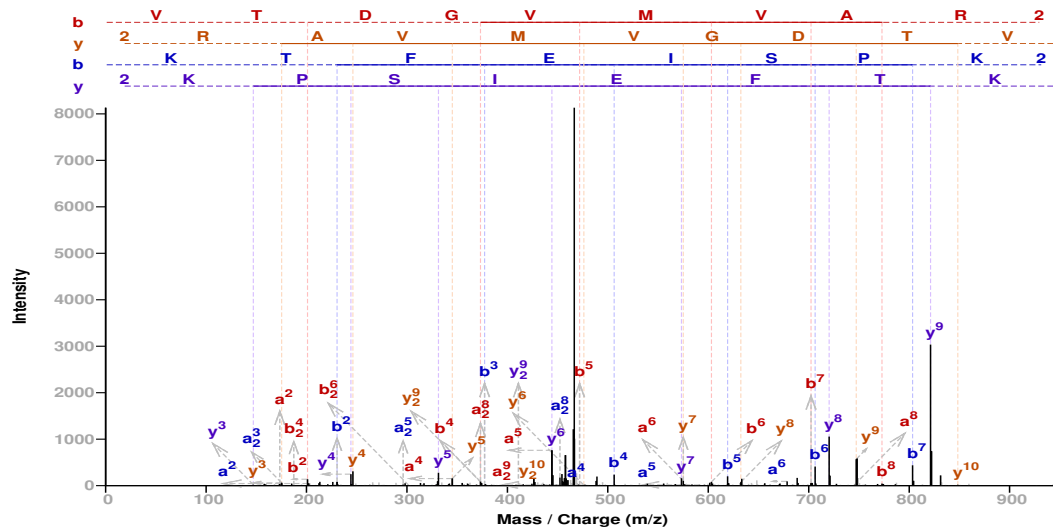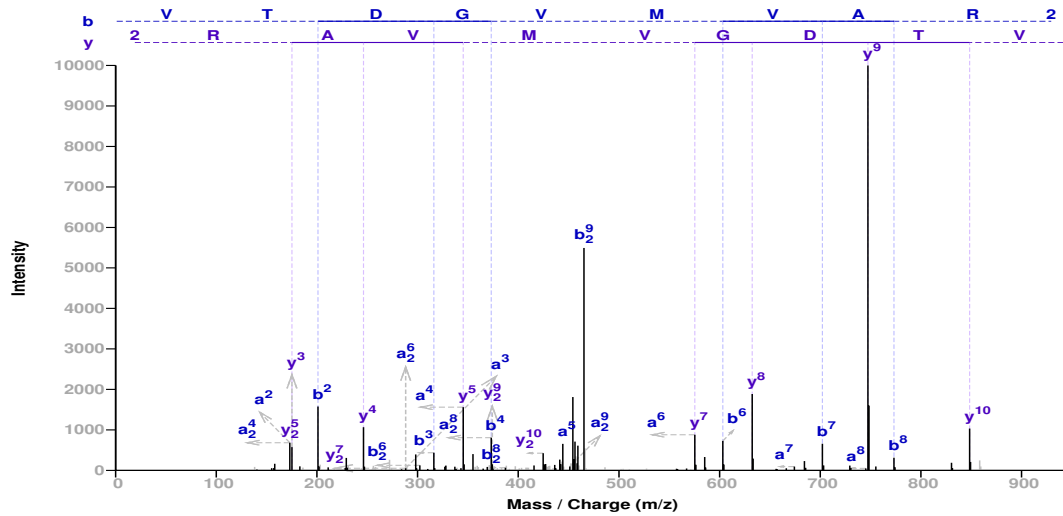

yeast0\_Scan\_Number\_5322 Precursor m/z: 429.559 cosine: 0.766  $\alpha$ : 0.139

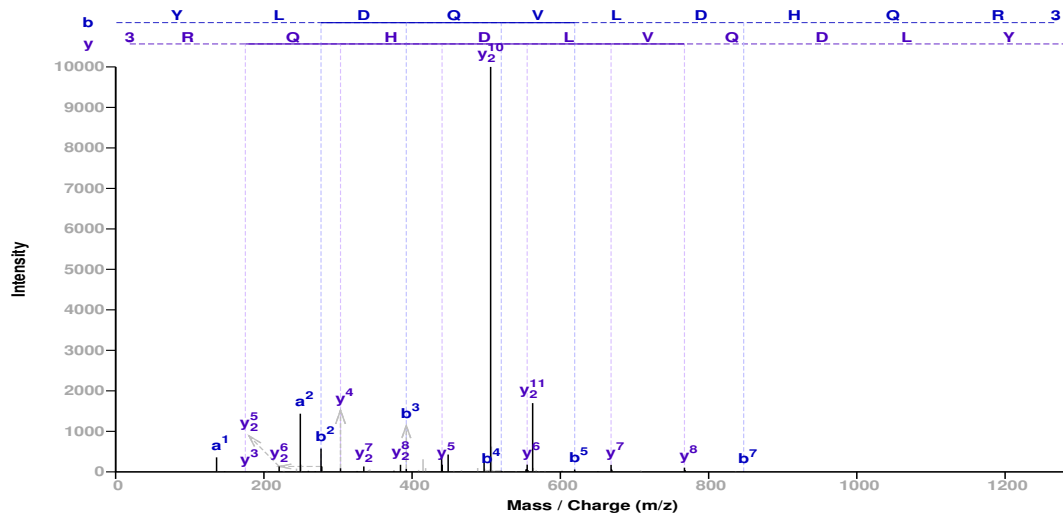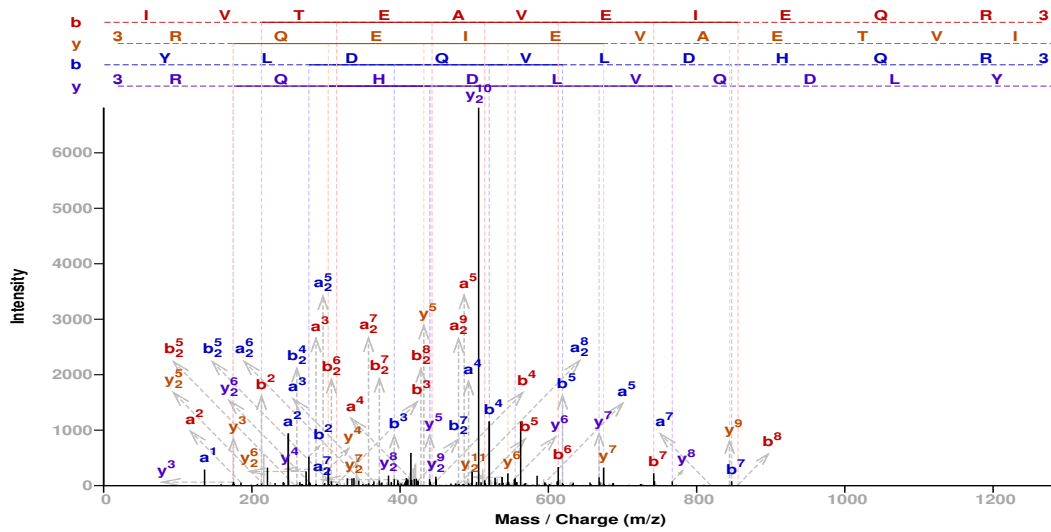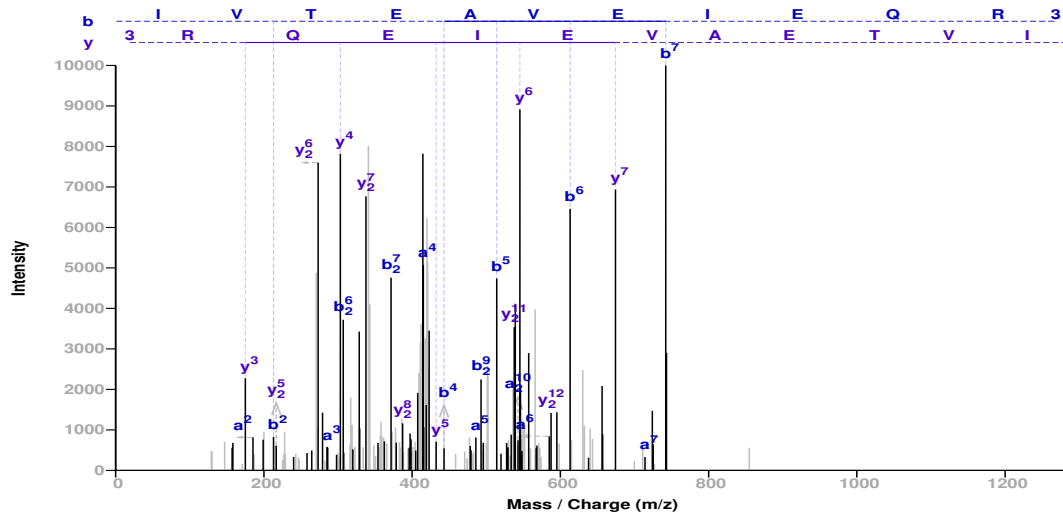



yeast0\_Scan\_Number\_1622 Precursor m/z: 360.222 cosine: 0.878  $\alpha$ : 0.130

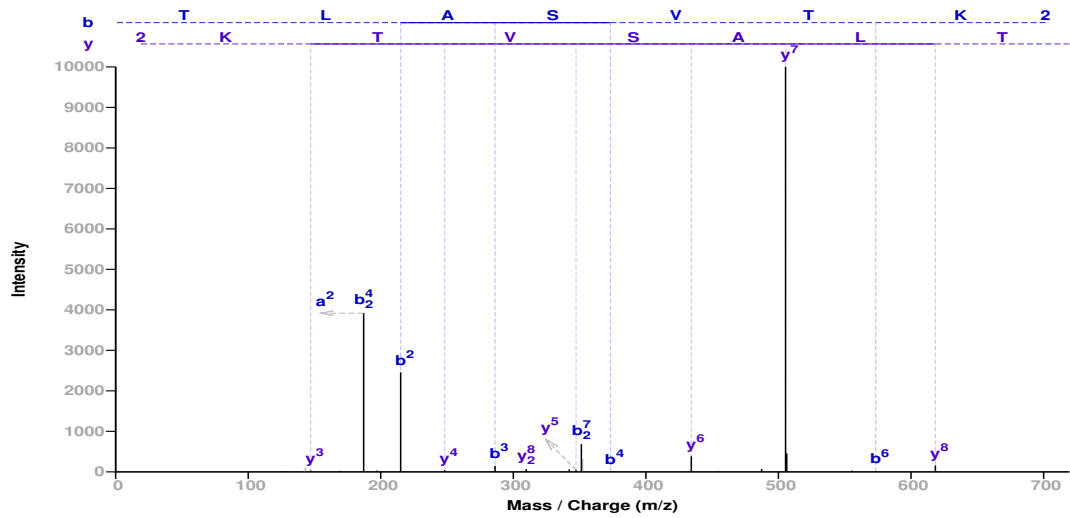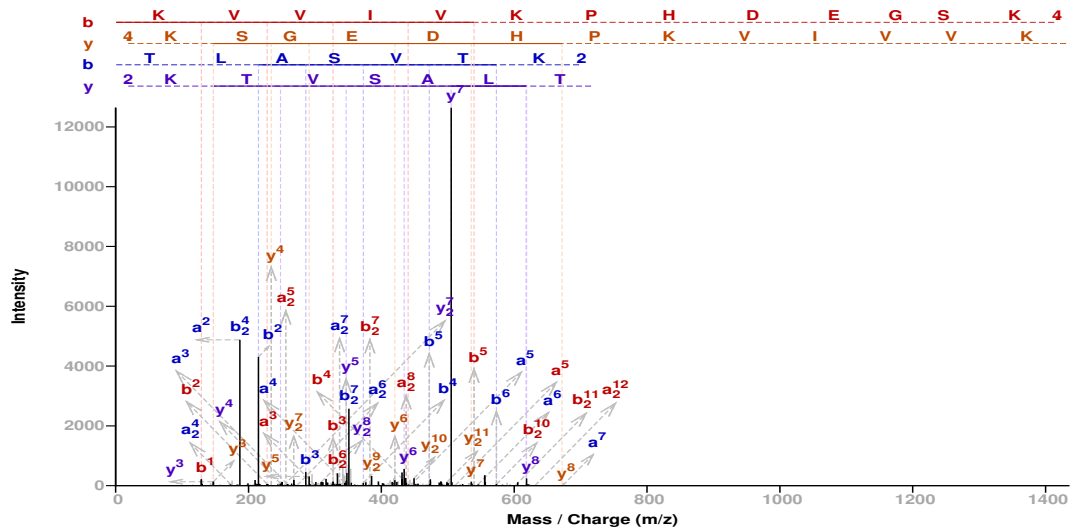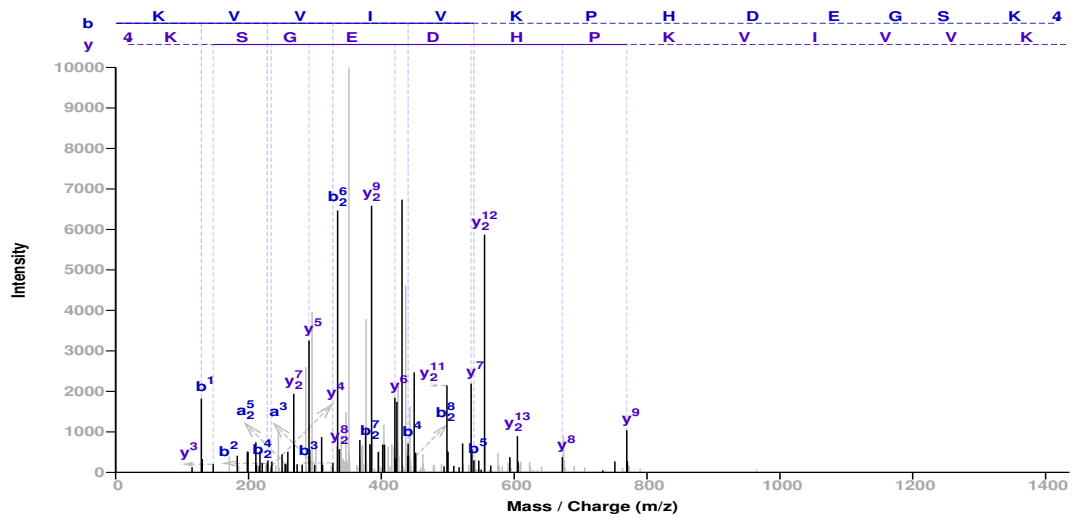

yeast0\_Scan\_Number\_7857 Precursor m/z: 676.868 cosine: 0.811  $\alpha$ : 0.129

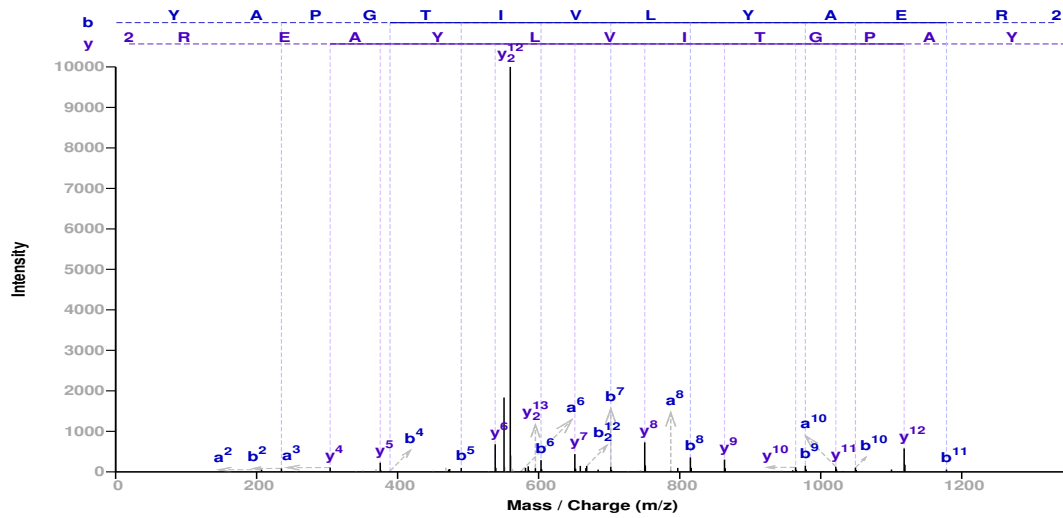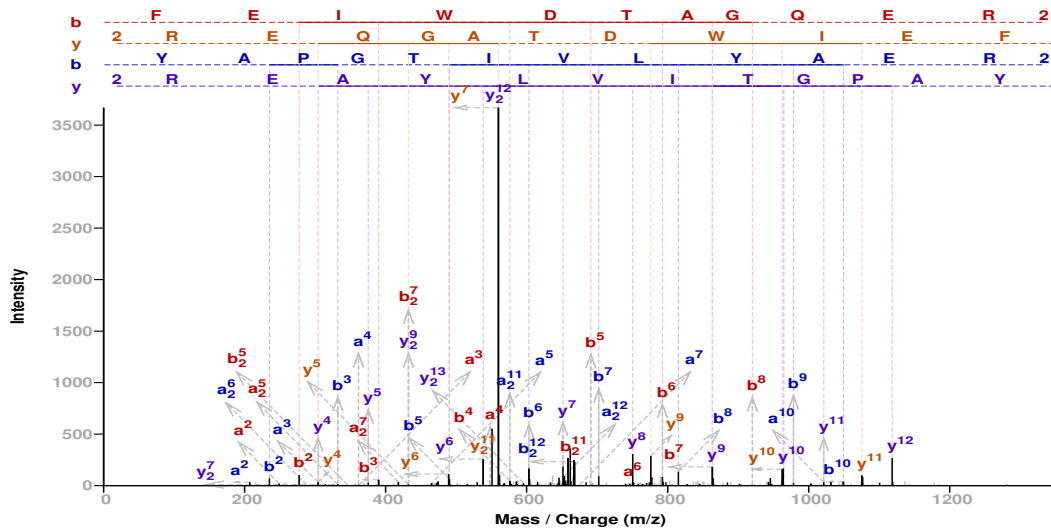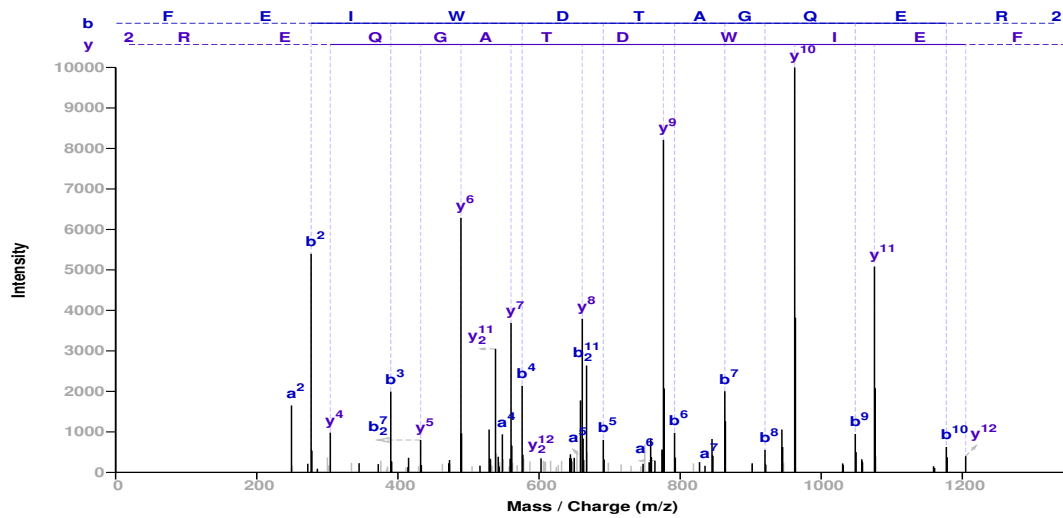

yeast0\_Scan\_Number\_3714 Precursor m/z: 327.858 cosine: 0.955  $\alpha$ : 0.113

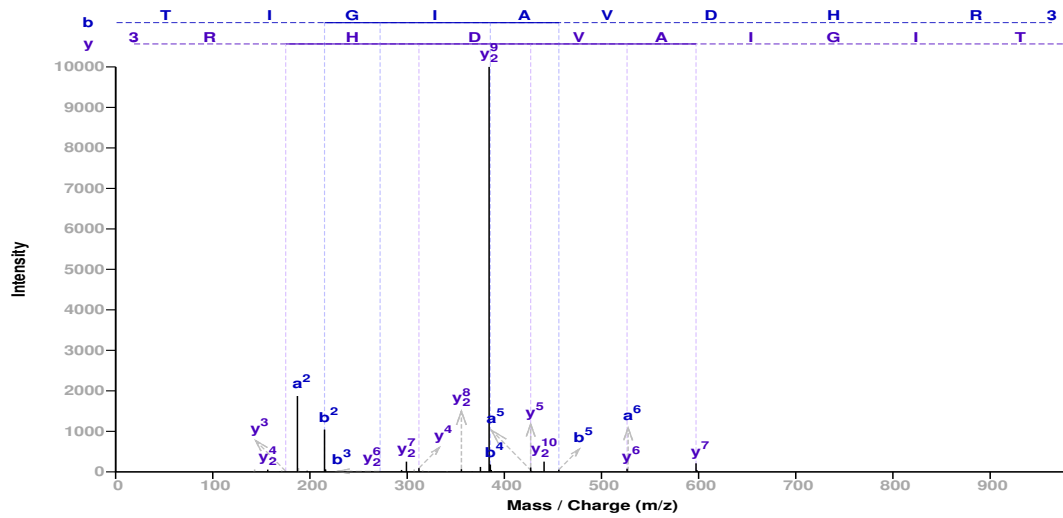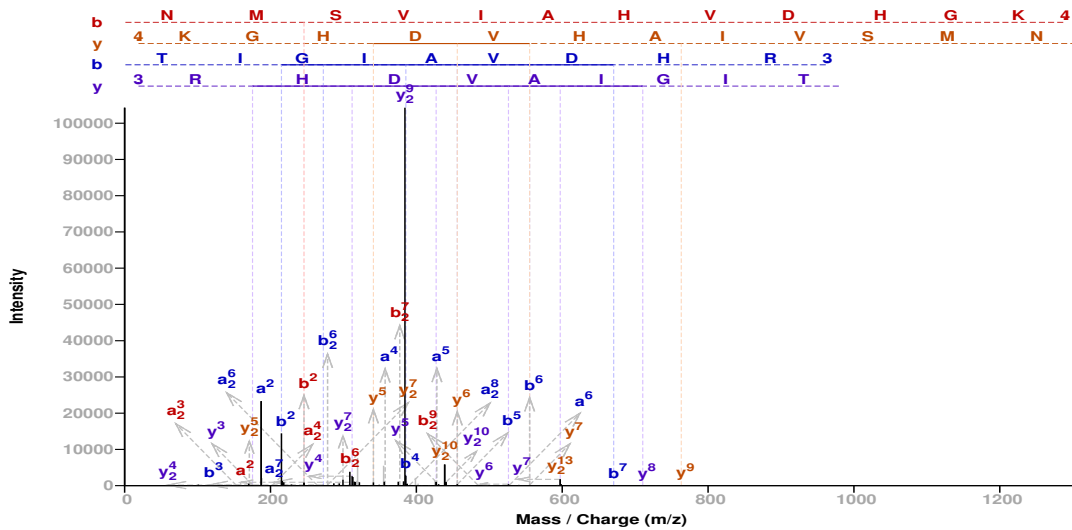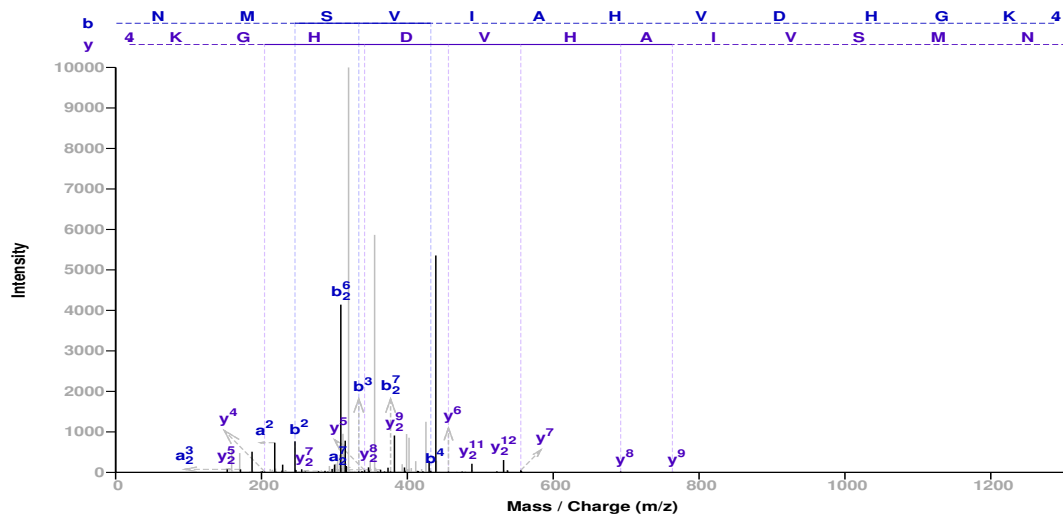

yeast0\_Scan\_Number\_5945 Precursor m/z: 383.565 cosine: 0.873  $\alpha$ : 0.104

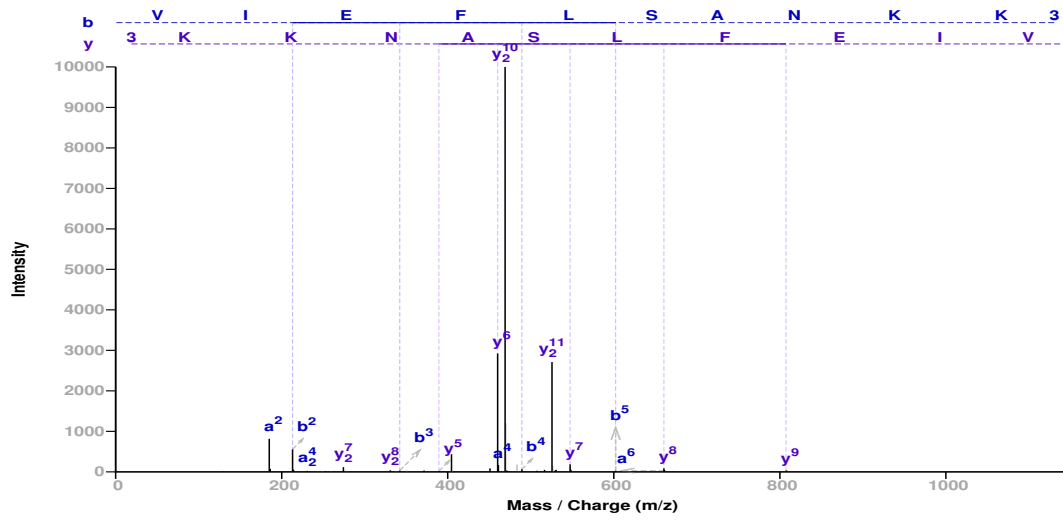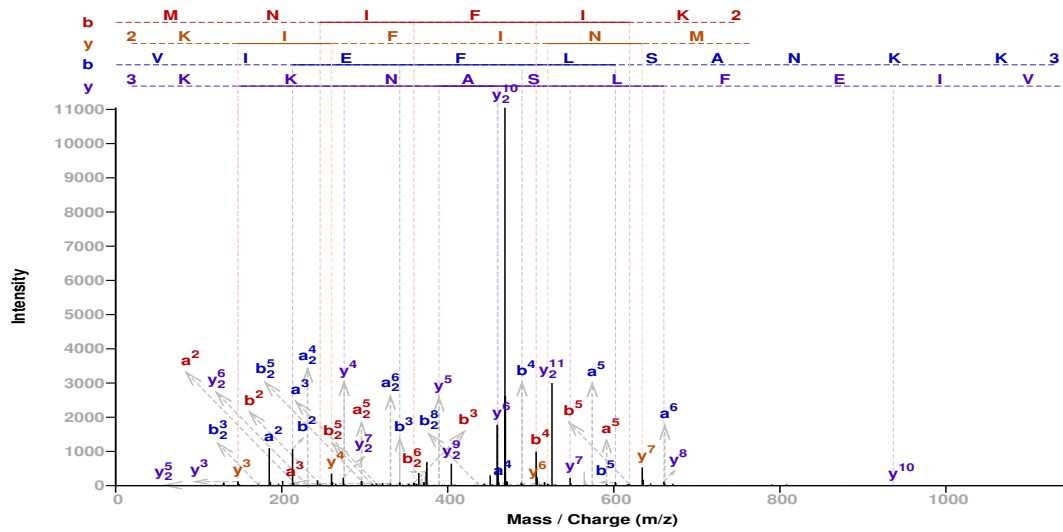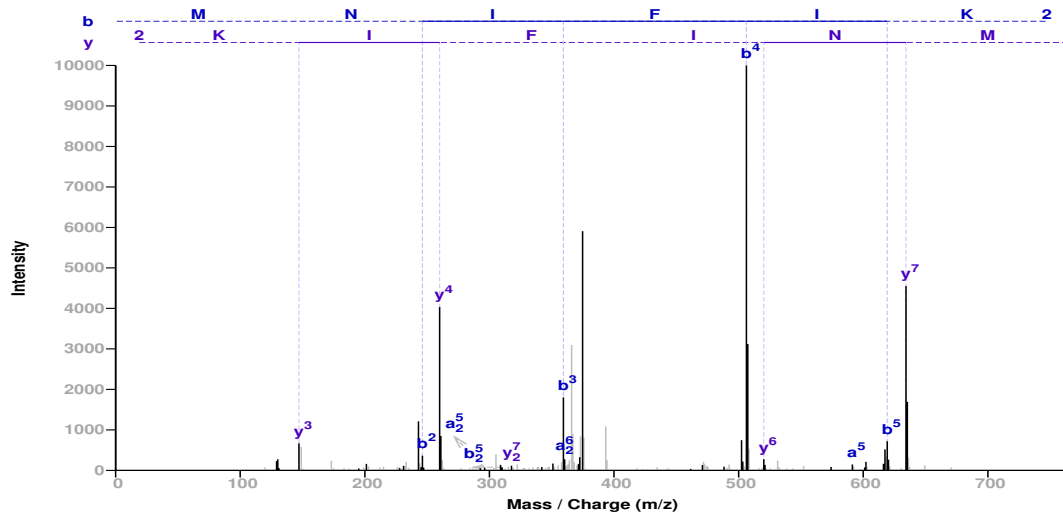

yeast0\_Scan\_Number\_10456 Precursor m/z: 673.387 cosine: 0.779  $\alpha$ : 0.100

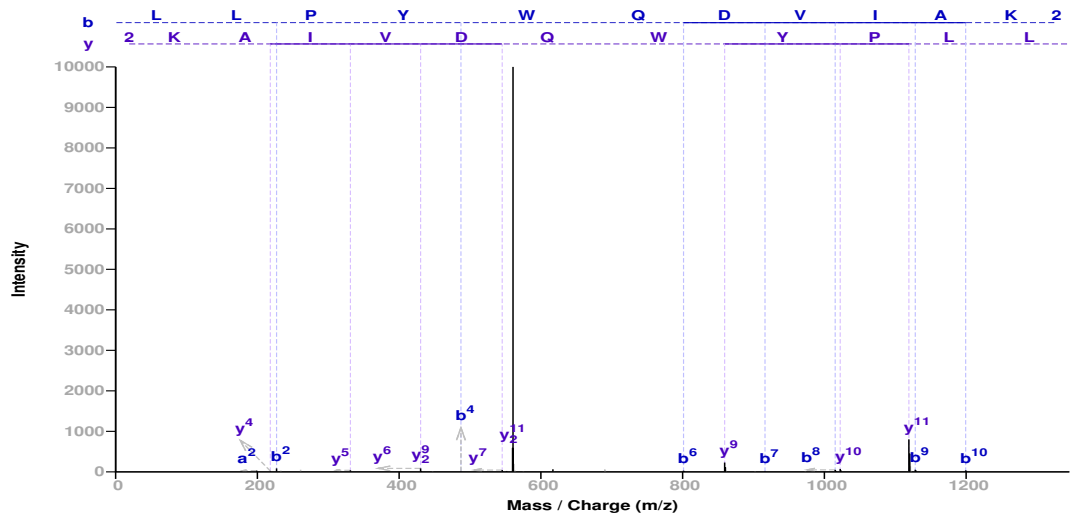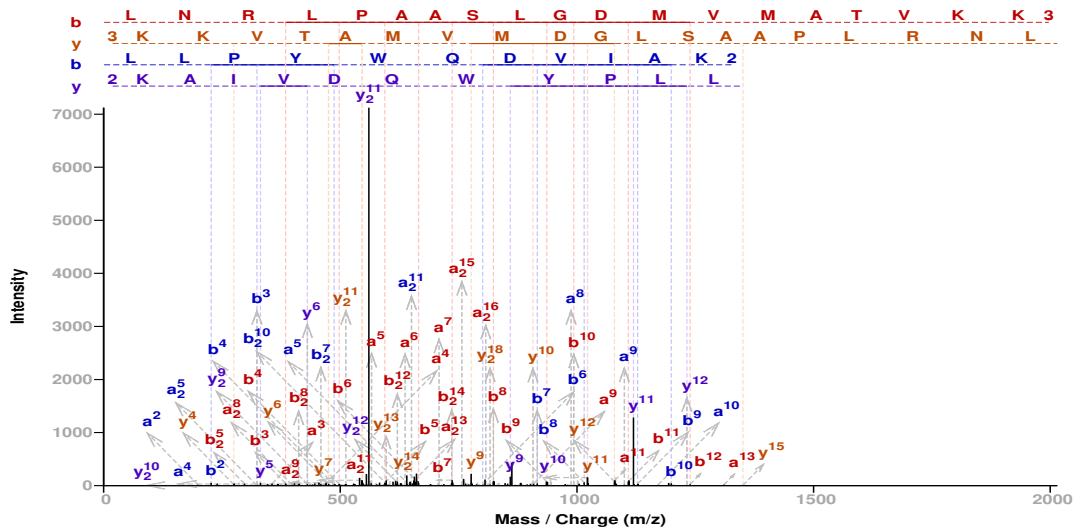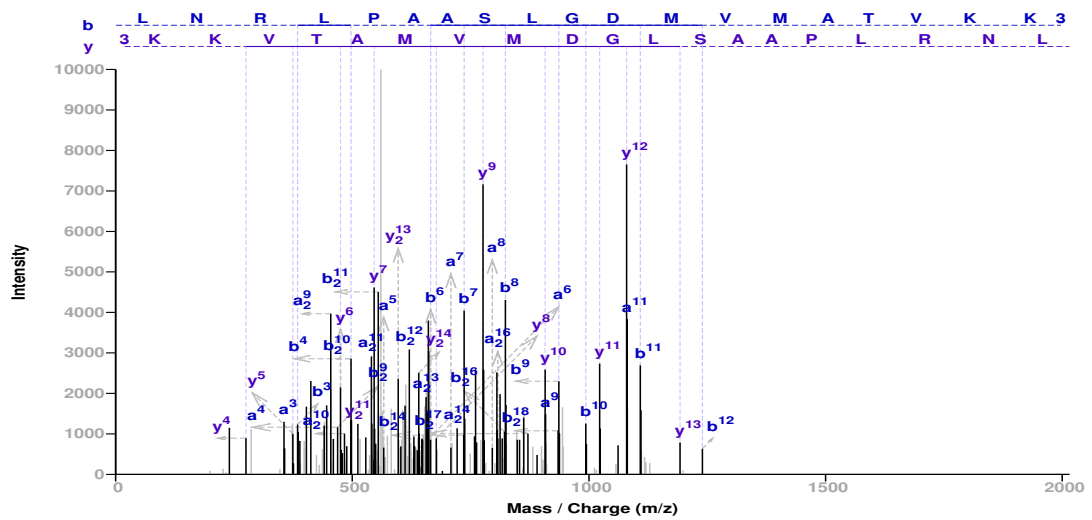

yeast0\_Scan\_Number\_4605 Precursor m/z: 442.271 cosine: 0.882  $\alpha$ : 0.100

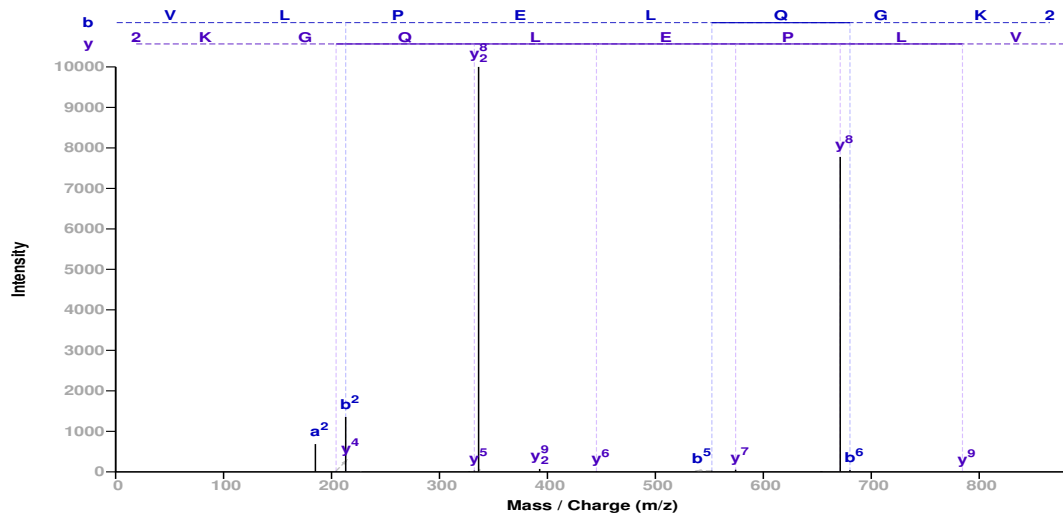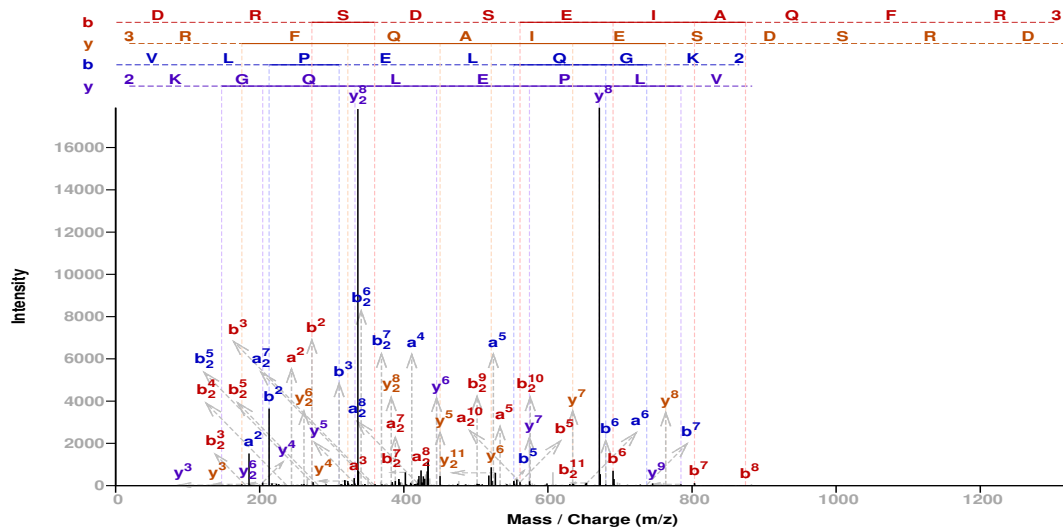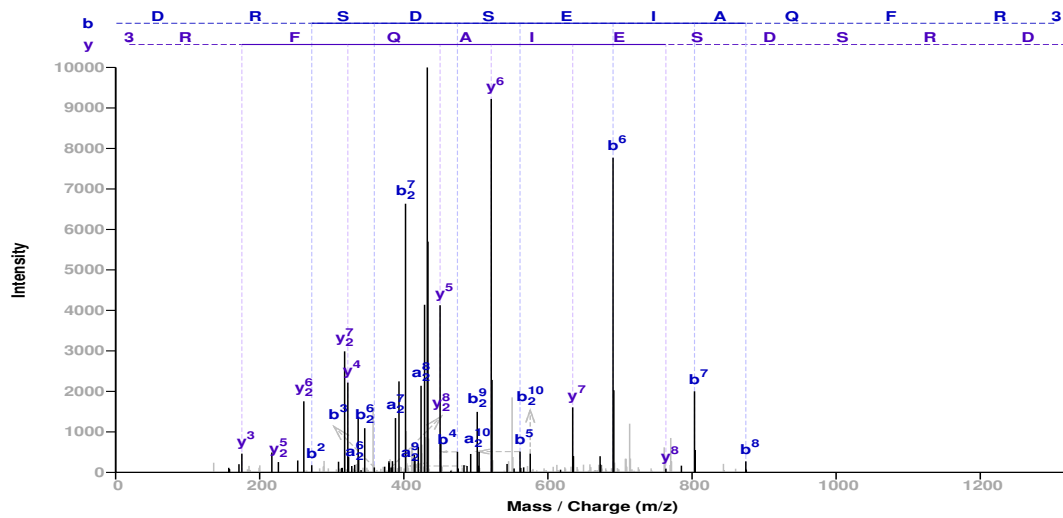

yeast00\_Scan\_Number\_6364 Precursor m/z: 558.801 cosine: 0.770  $\alpha$ : 0.983

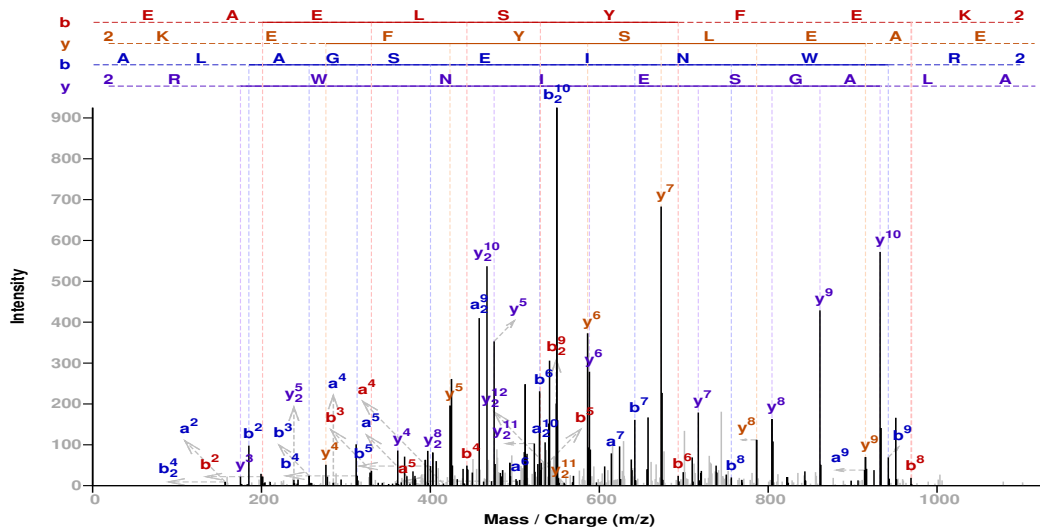





yeast00\_Scan\_Number\_3387 Precursor m/z: 558.773 cosine: 0.790  $\alpha$ : 0.952

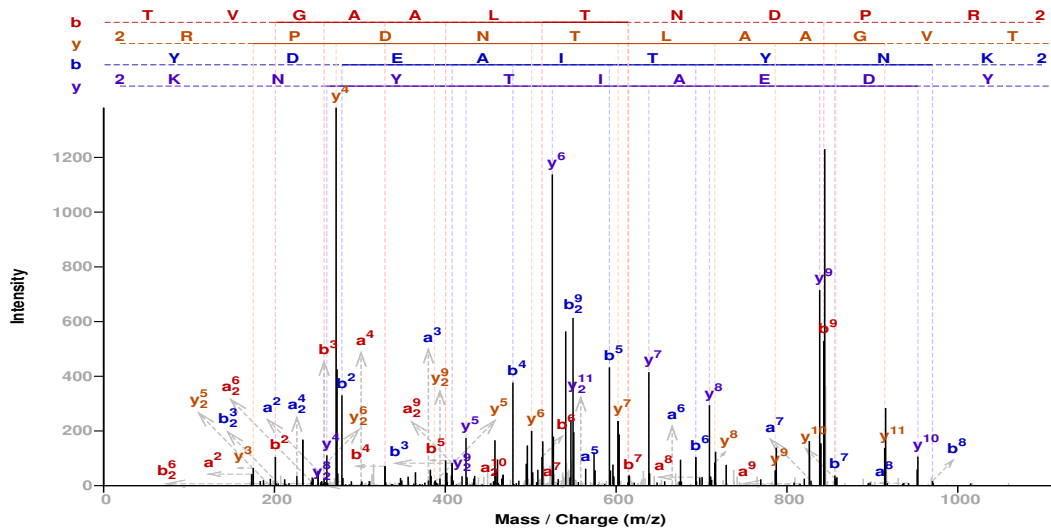

yeast00\_Scan\_Number\_3239 Precursor m/z: 353.881 cosine: 0.783  $\alpha$ : 0.951

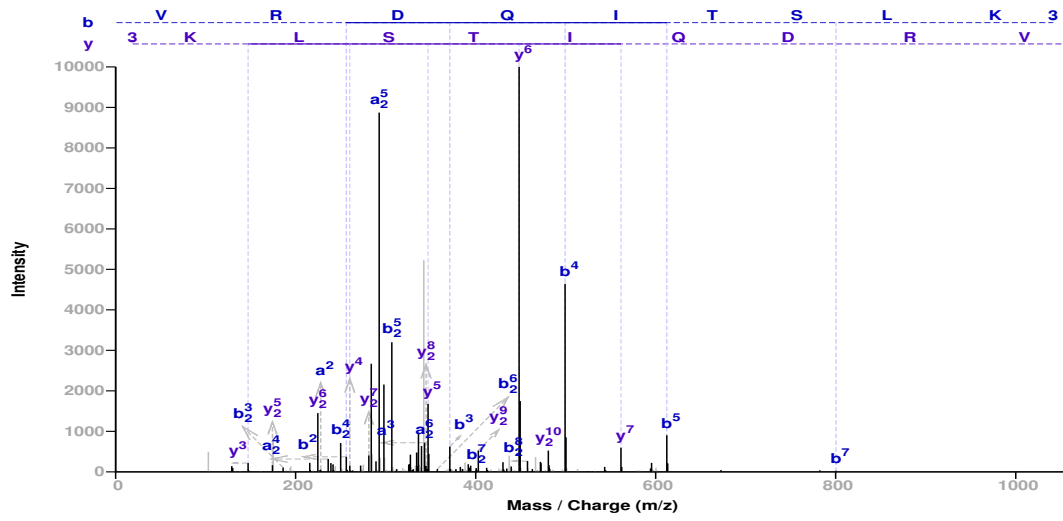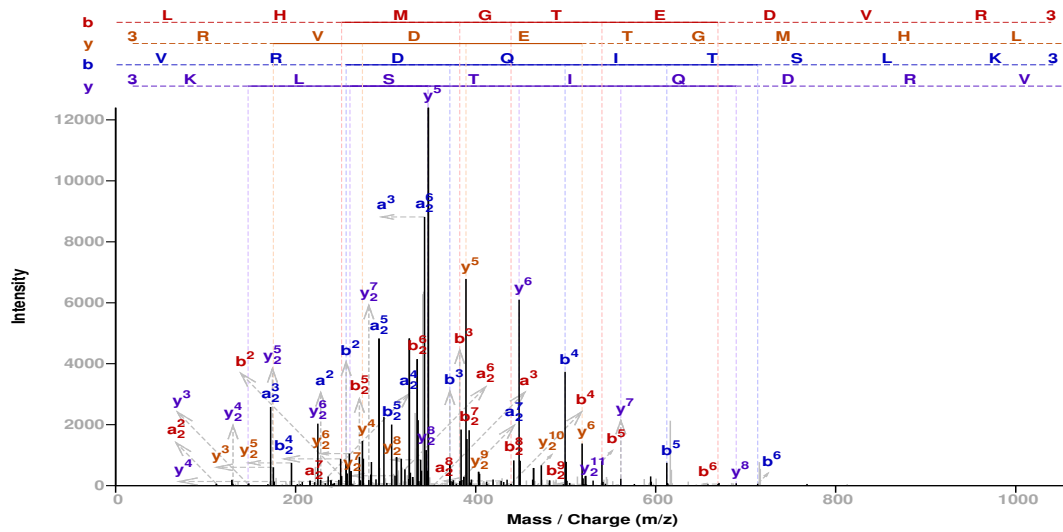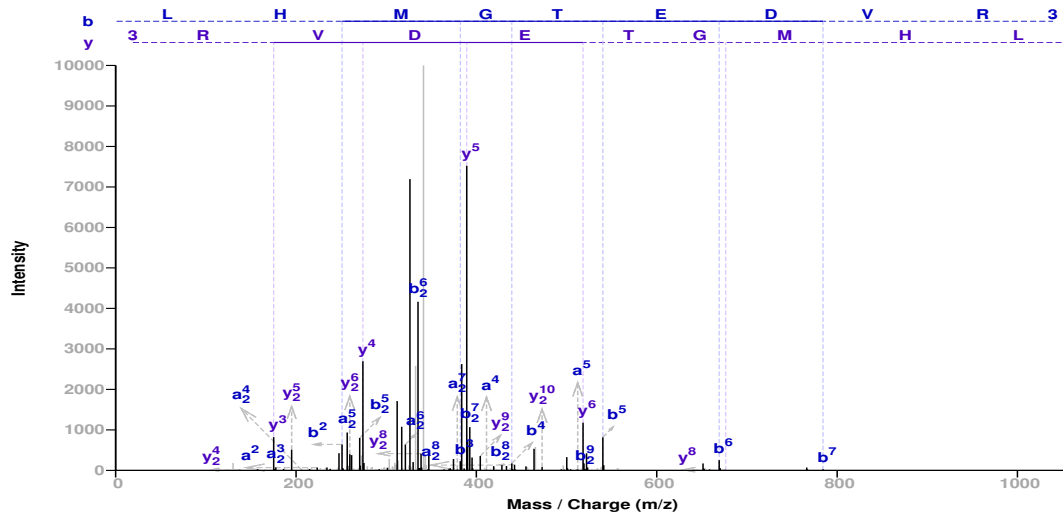

yeast00.Scan\_Number\_2253 Precursor m/z: 509.252 cosine: 0.844  $\alpha$ : 0.932

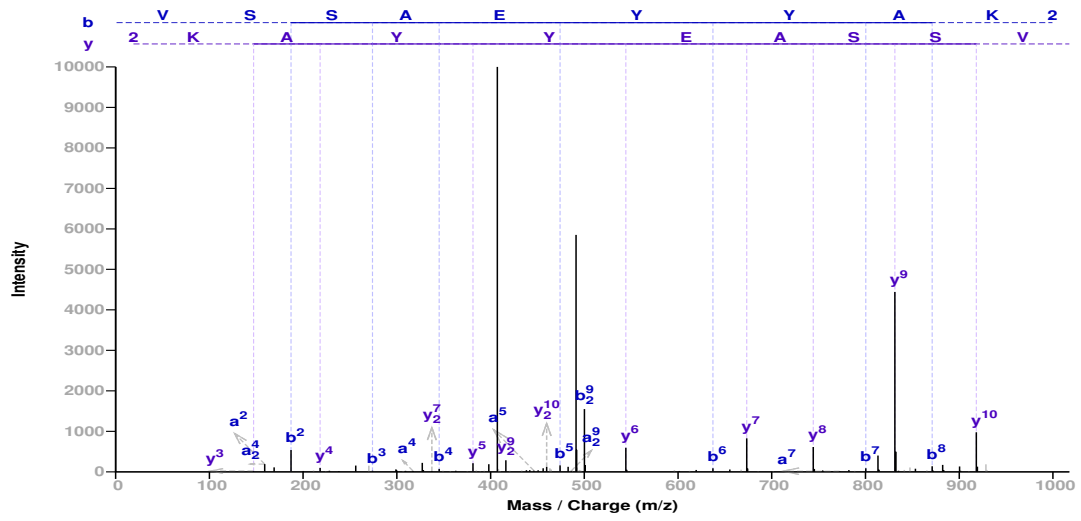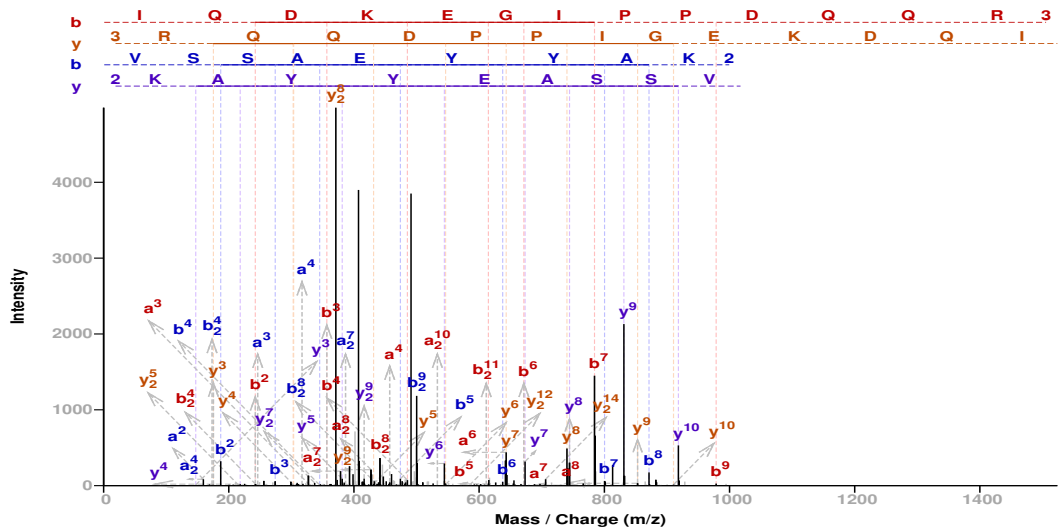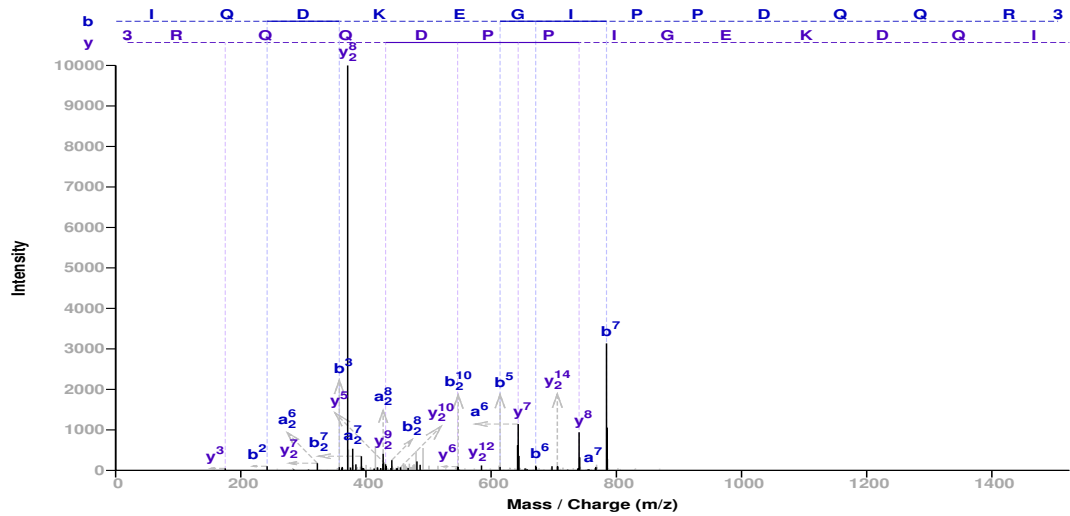

yeast00\_Scan\_Number\_3475 Precursor m/z: 368.198 cosine: 0.789  $\alpha$ : 0.929

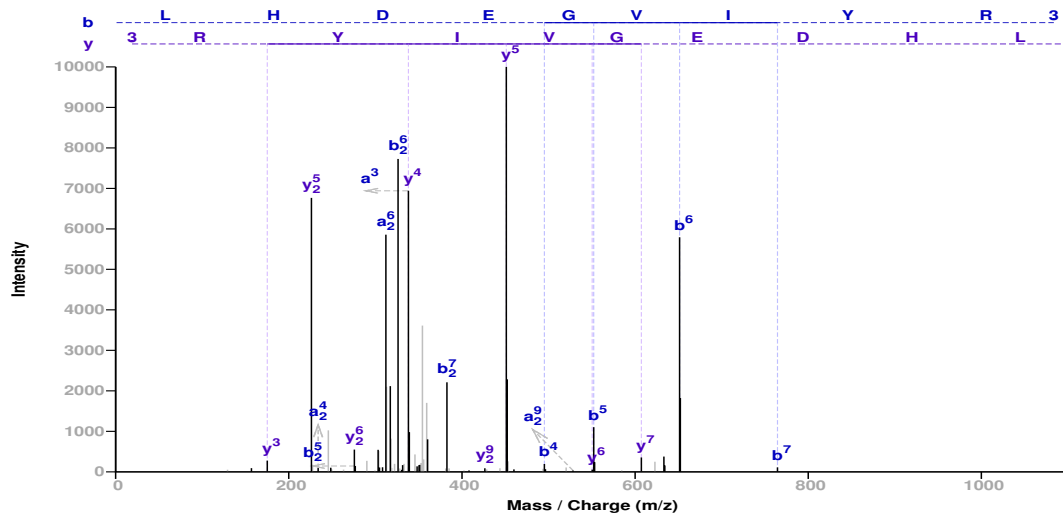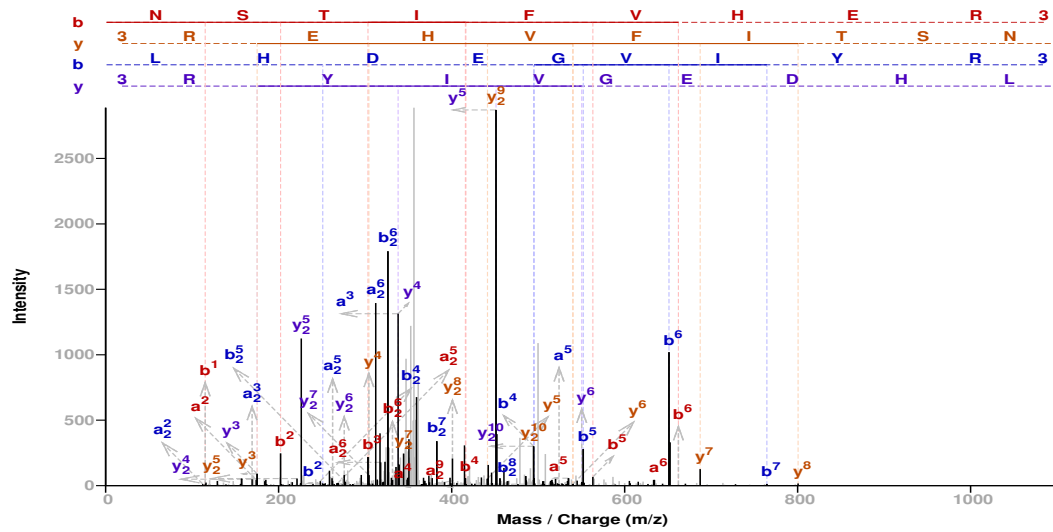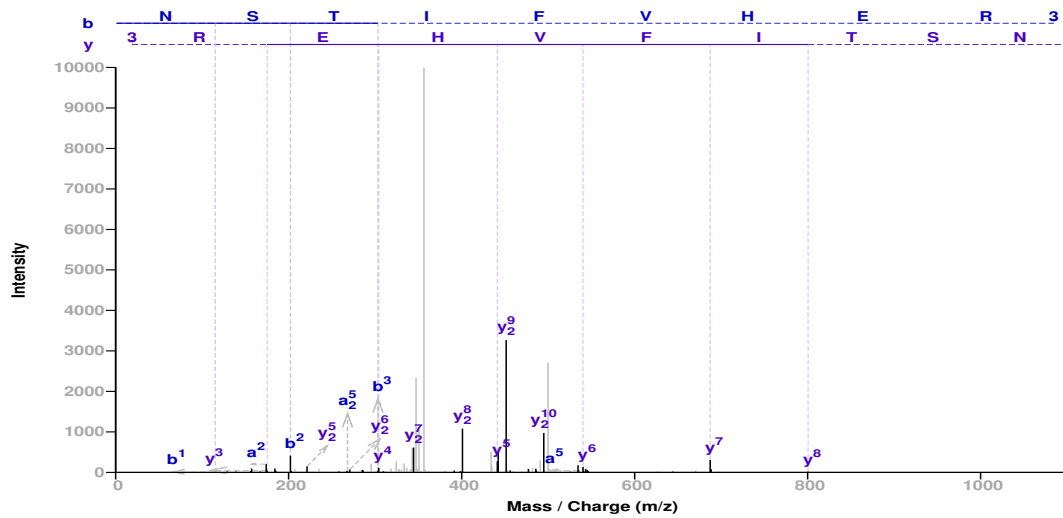

yeast00\_Scan\_Number\_1107 Precursor m/z: 377.226 cosine: 0.846  $\alpha$ : 0.917

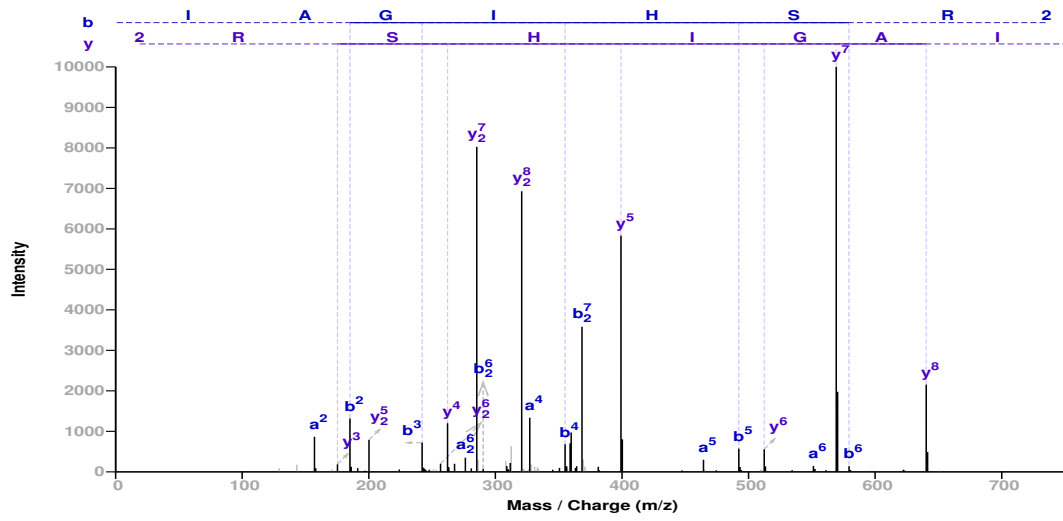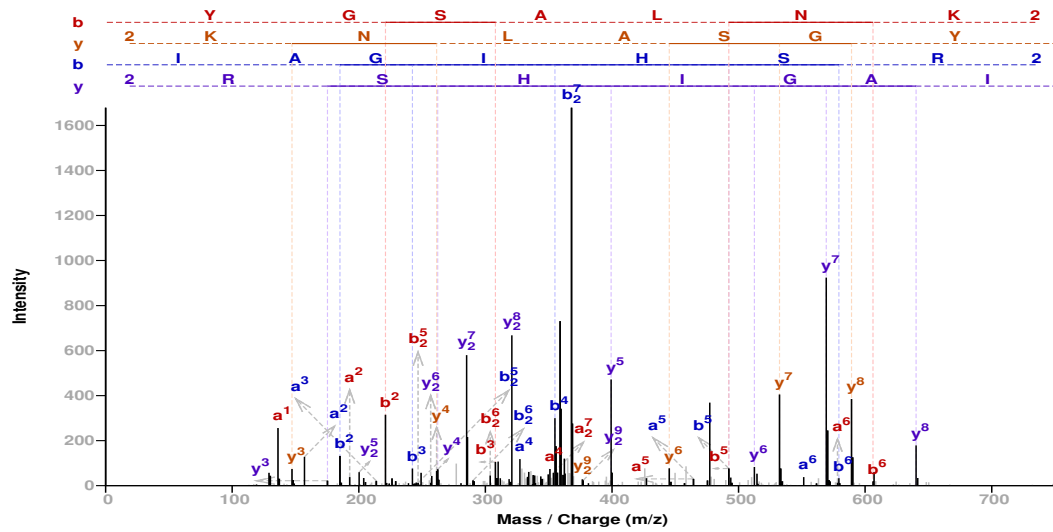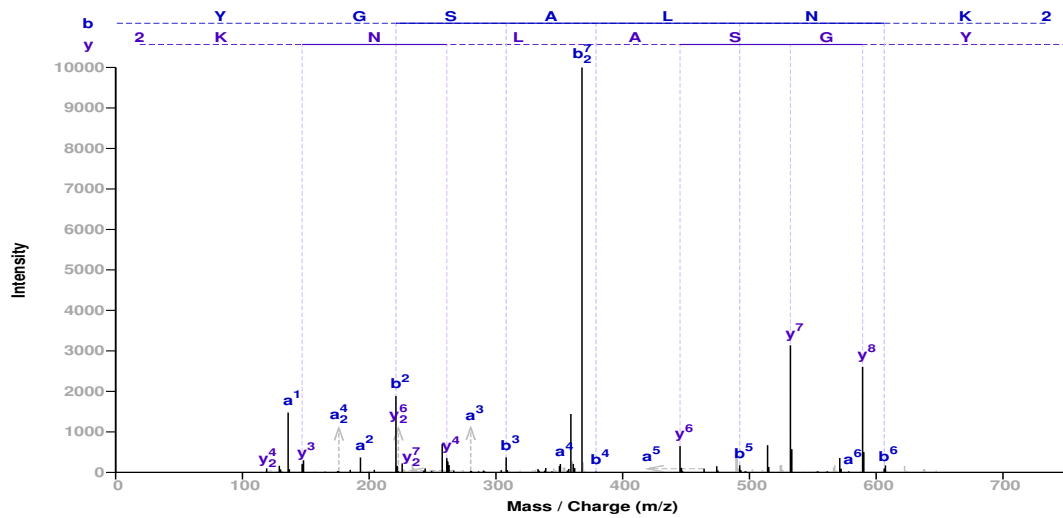

yeast00\_Scan\_Number\_5751 Precursor m/z: 489.775 cosine: 0.794  $\alpha$ : 0.890

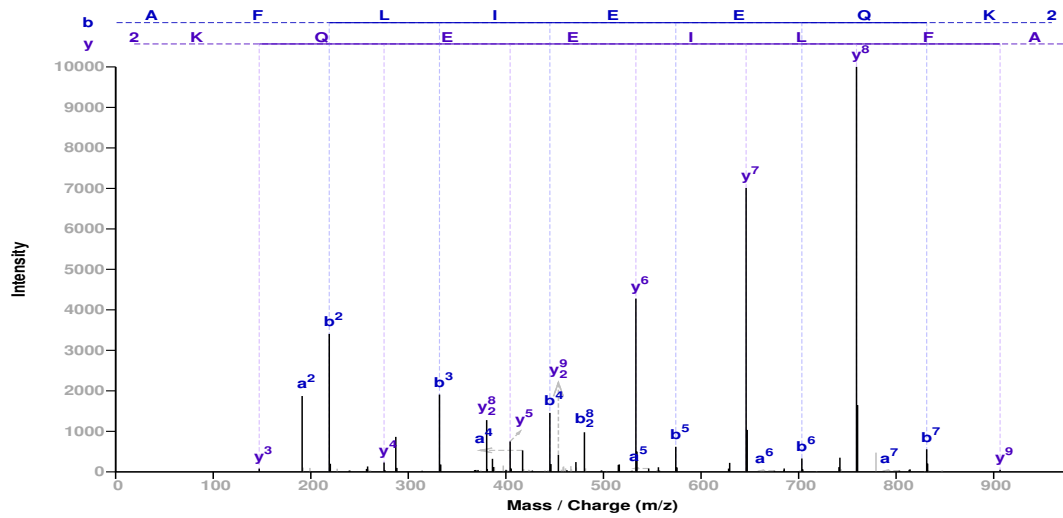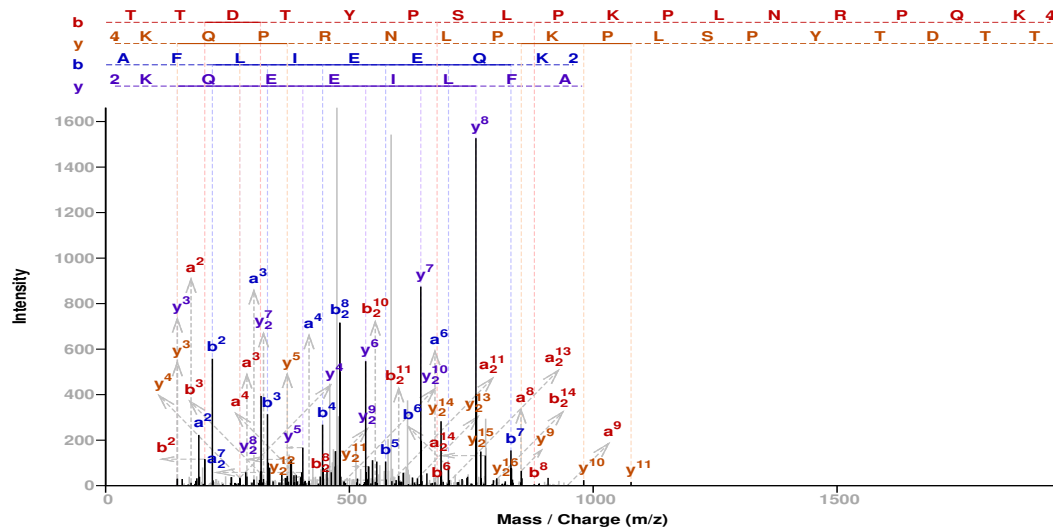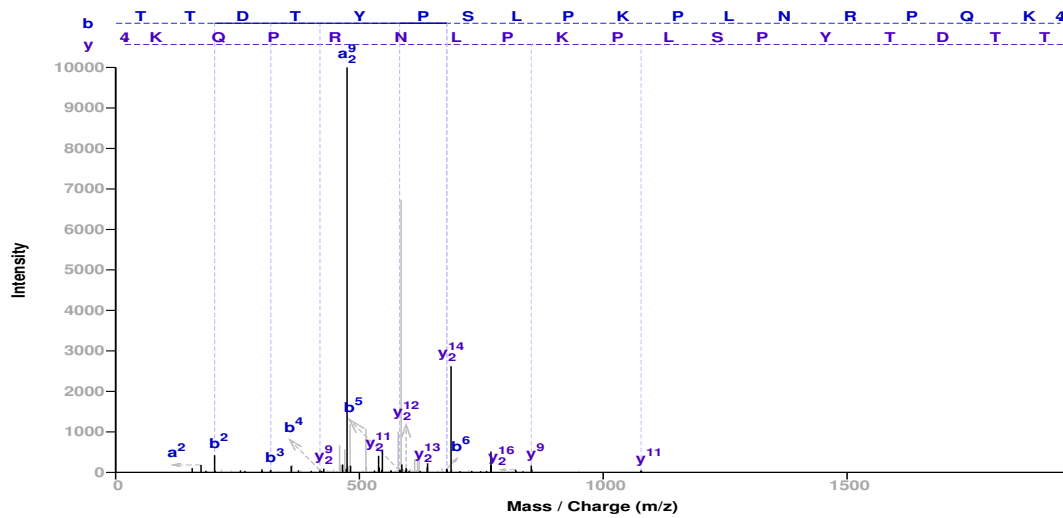

yeast00\_Scan\_Number\_4991 Precursor m/z: 432.737 cosine: 0.909  $\alpha$ : 0.887

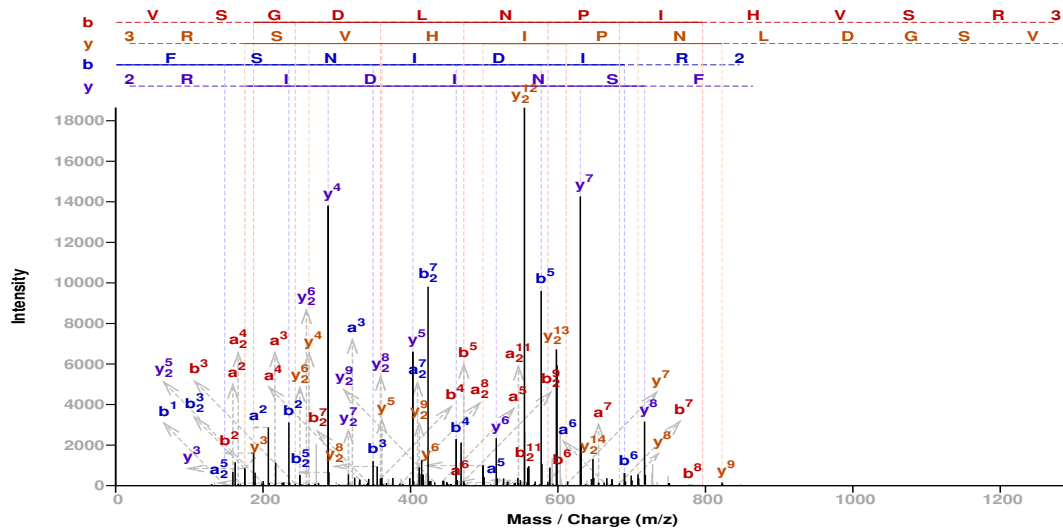





yeast00\_Scan\_Number\_5738 Precursor m/z: 411.248 cosine: 0.795  $\alpha$ : 0.867

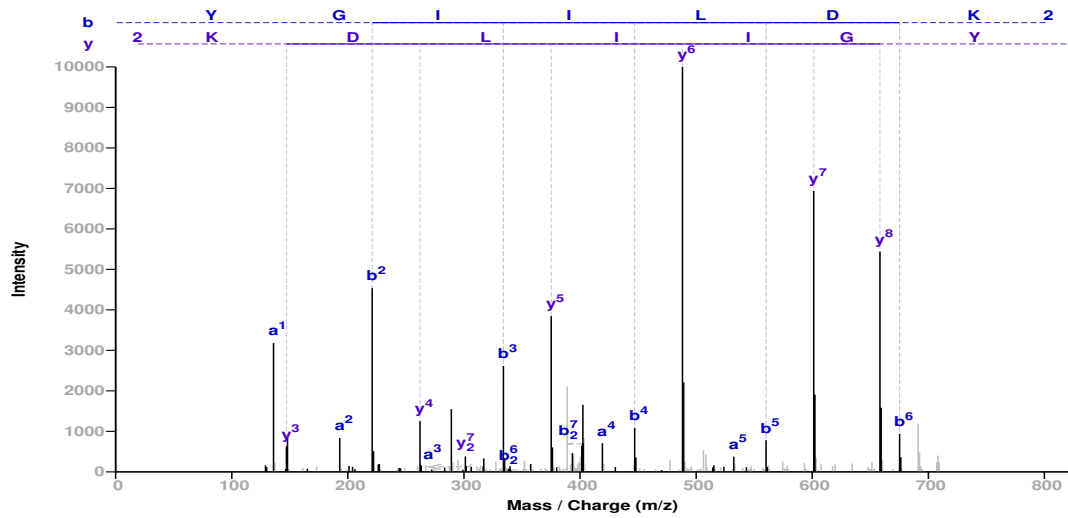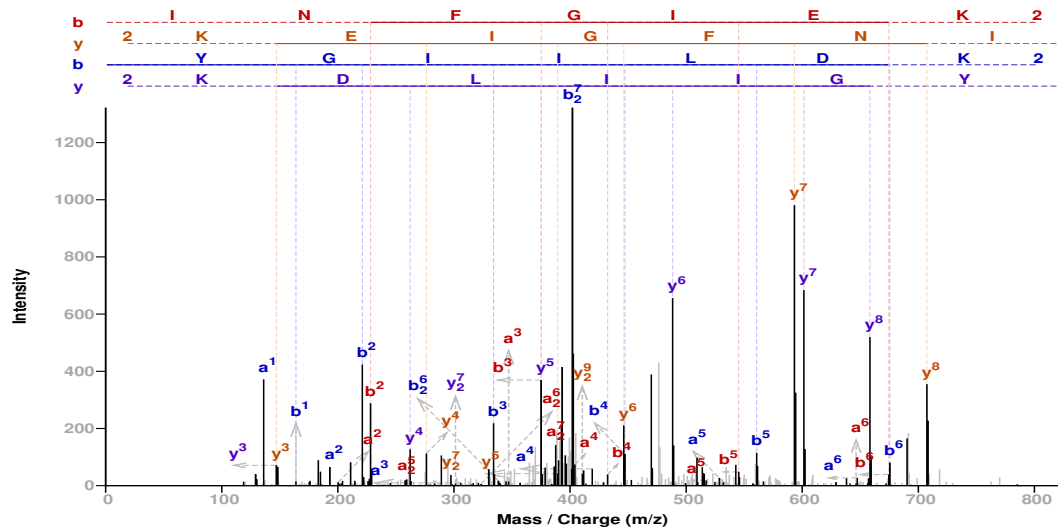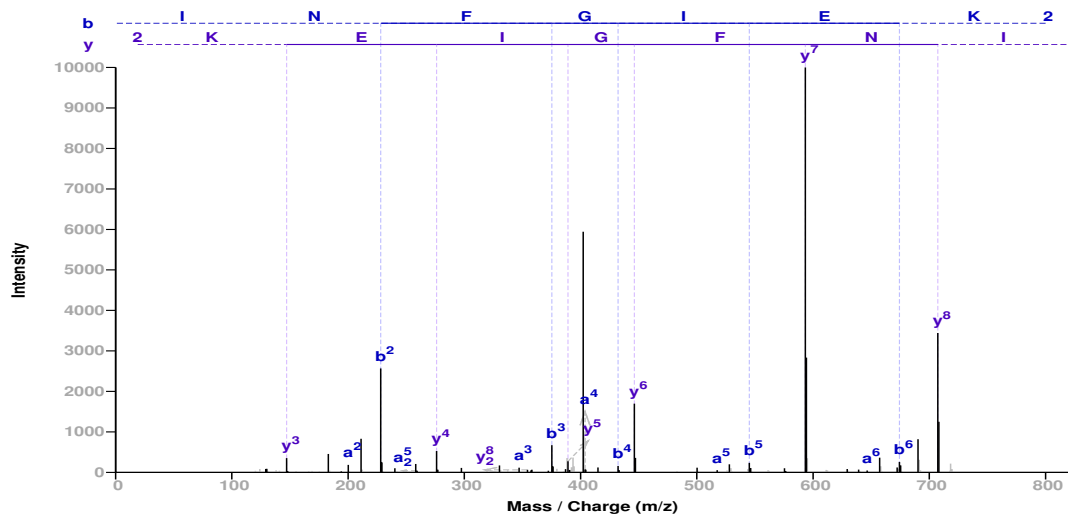

yeast00\_Scan\_Number\_4973 Precursor m/z: 485.996 cosine: 0.913  $\alpha$ : 0.866

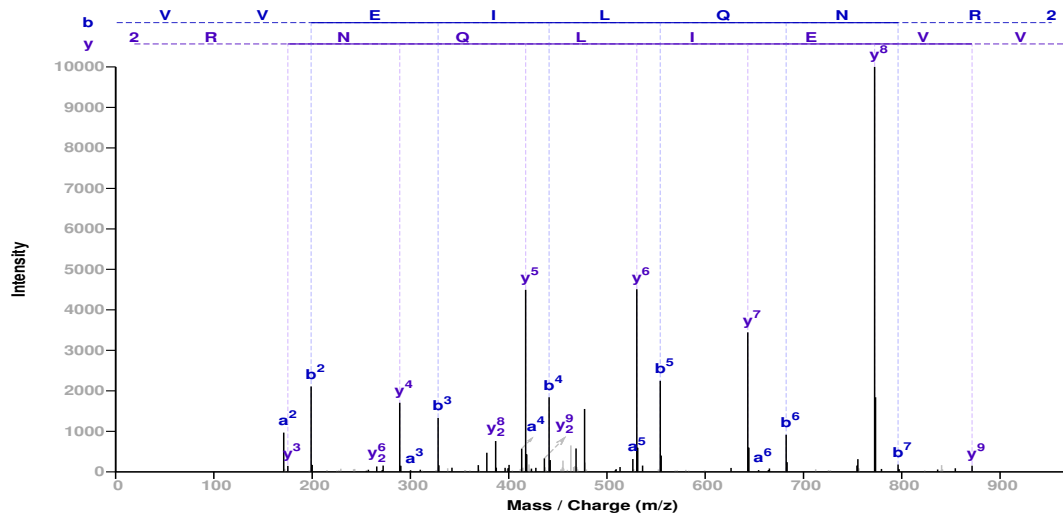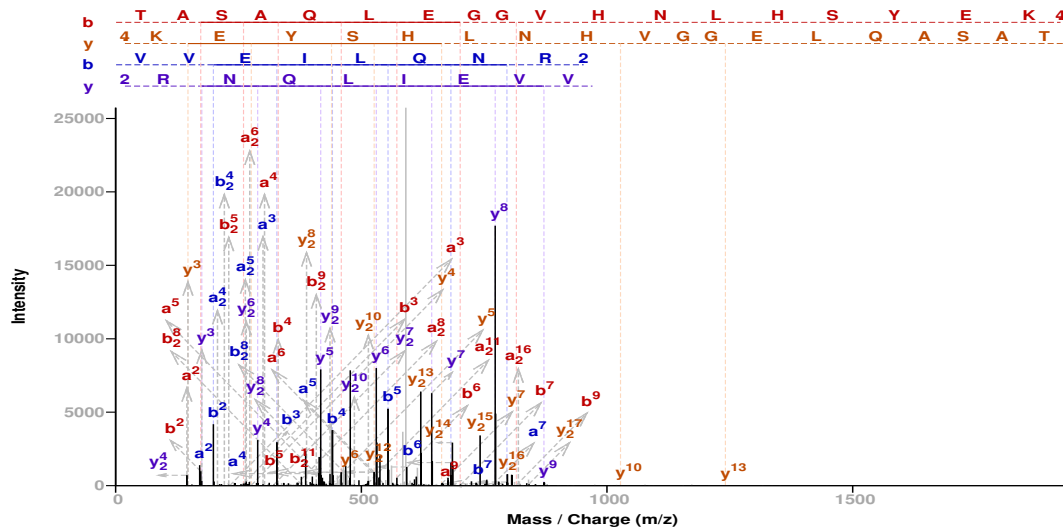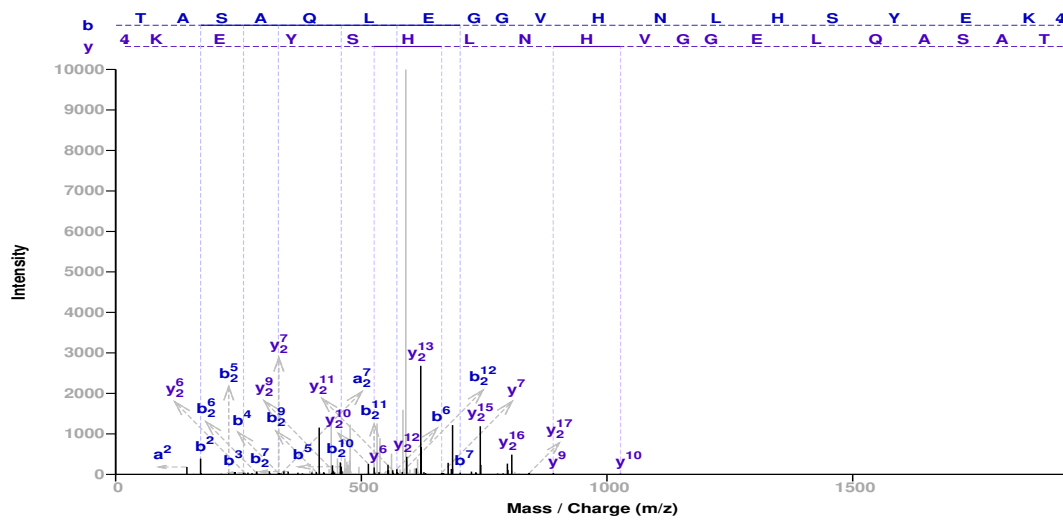

yeast00.Scan\_Number\_2945 Precursor m/z: 428.229 cosine: 0.816  $\alpha$ : 0.865

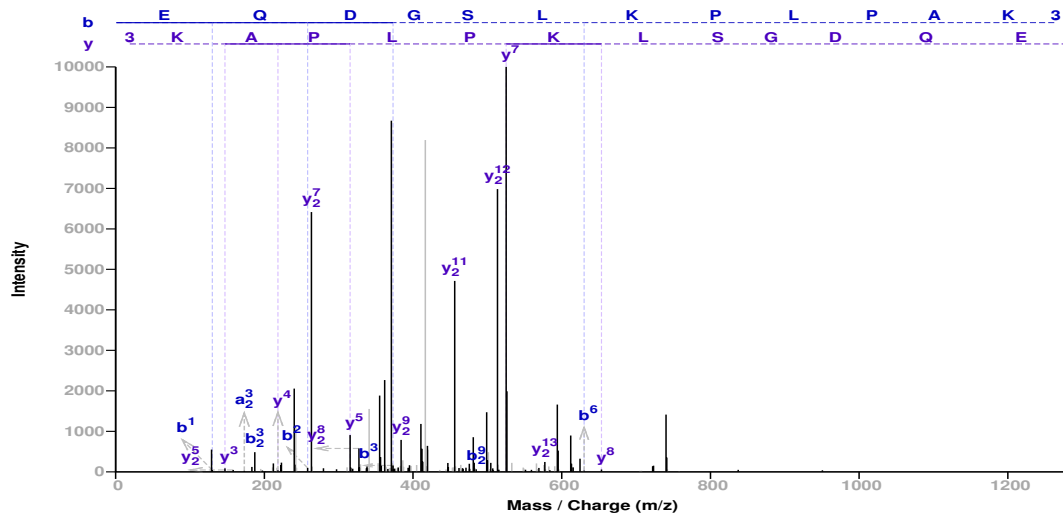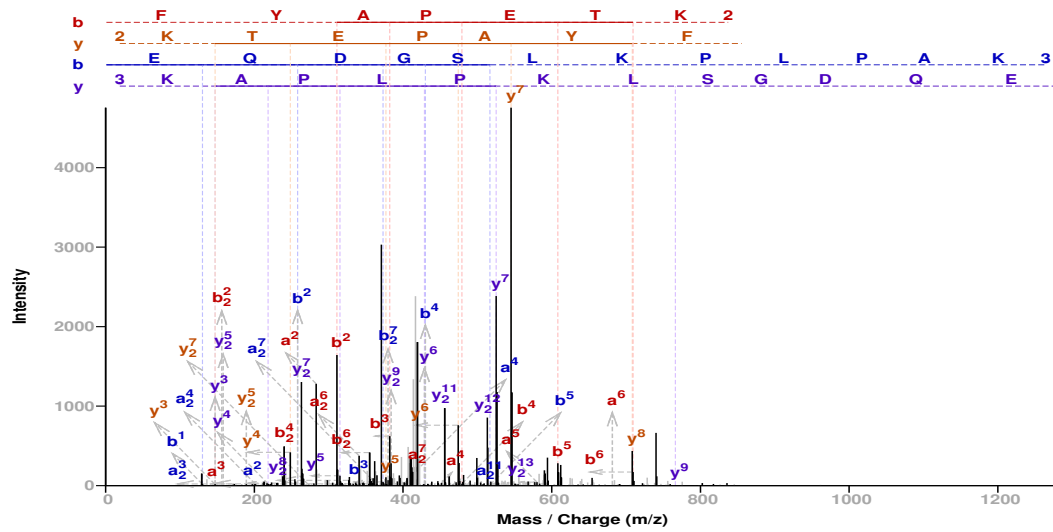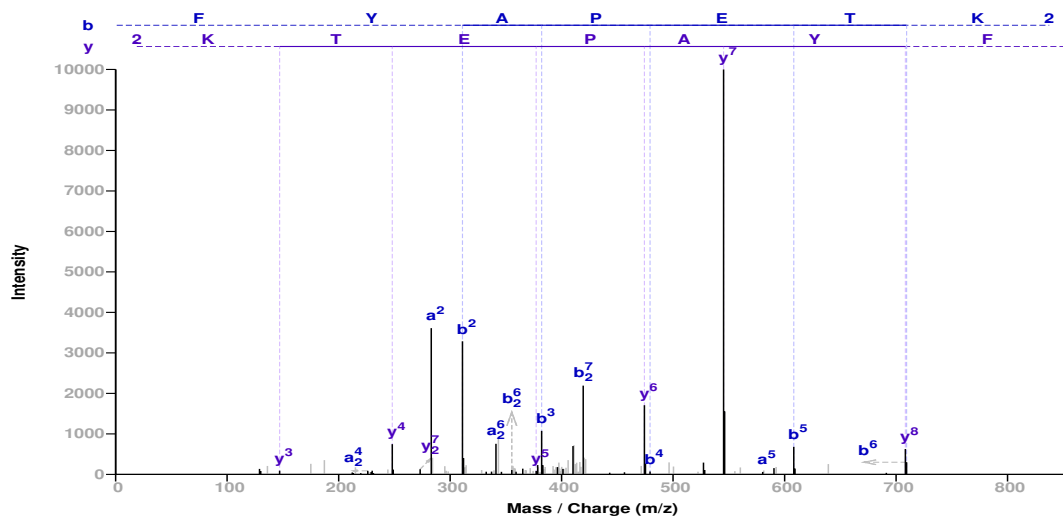

yeast00\_Scan\_Number\_2024 Precursor m/z: 411.235 cosine: 0.911  $\alpha$ : 0.864

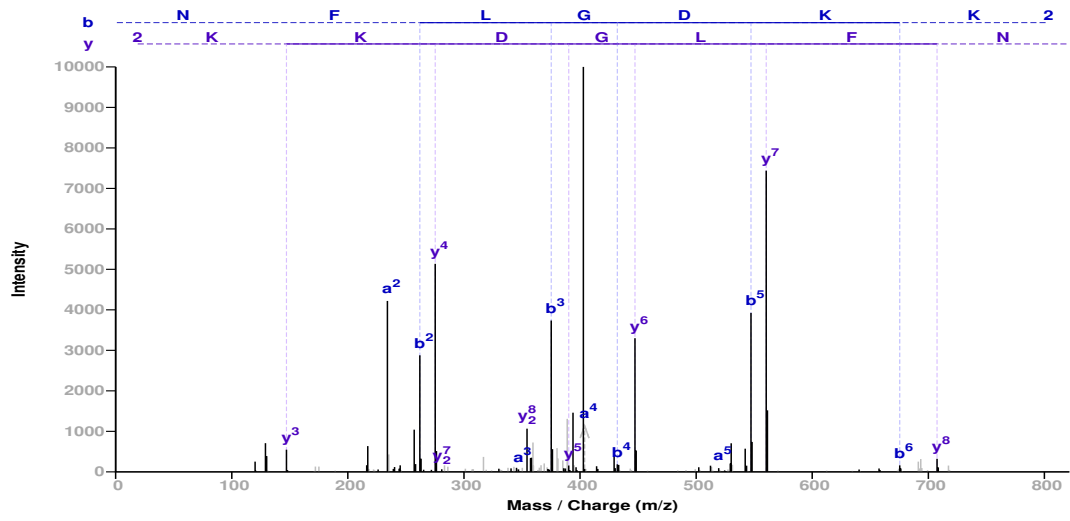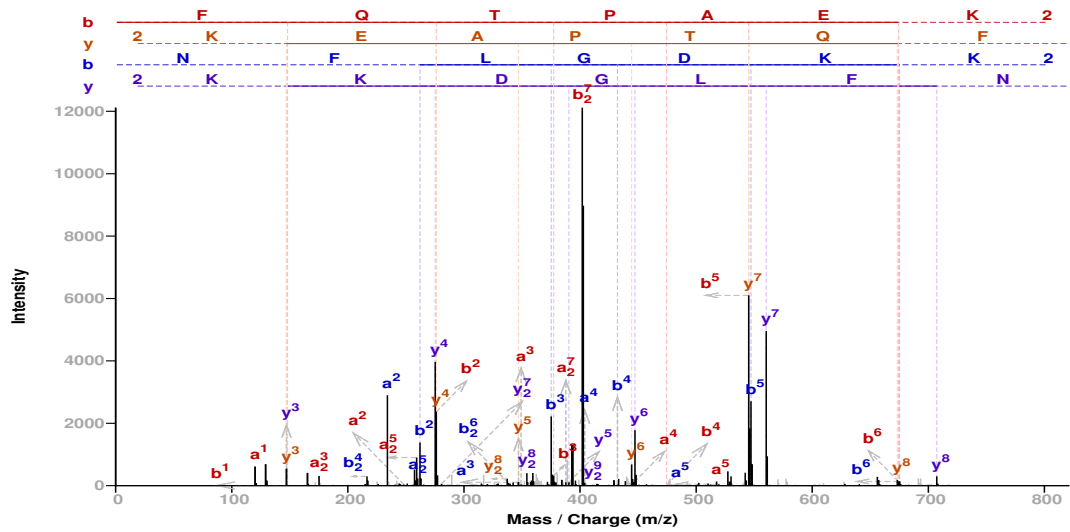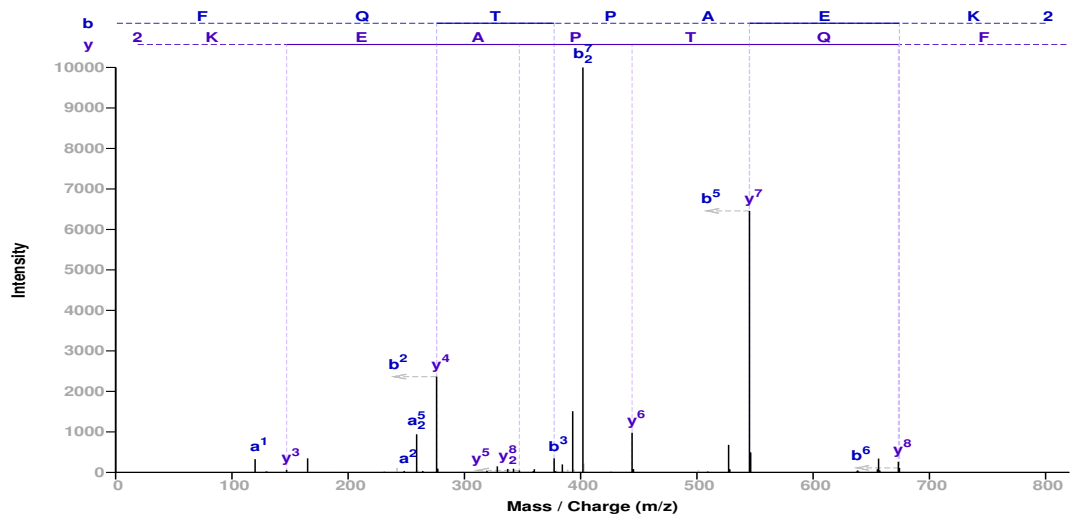

yeast00\_Scan\_Number\_1432 Precursor m/z: 469.245 cosine: 0.731  $\alpha$ : 0.864

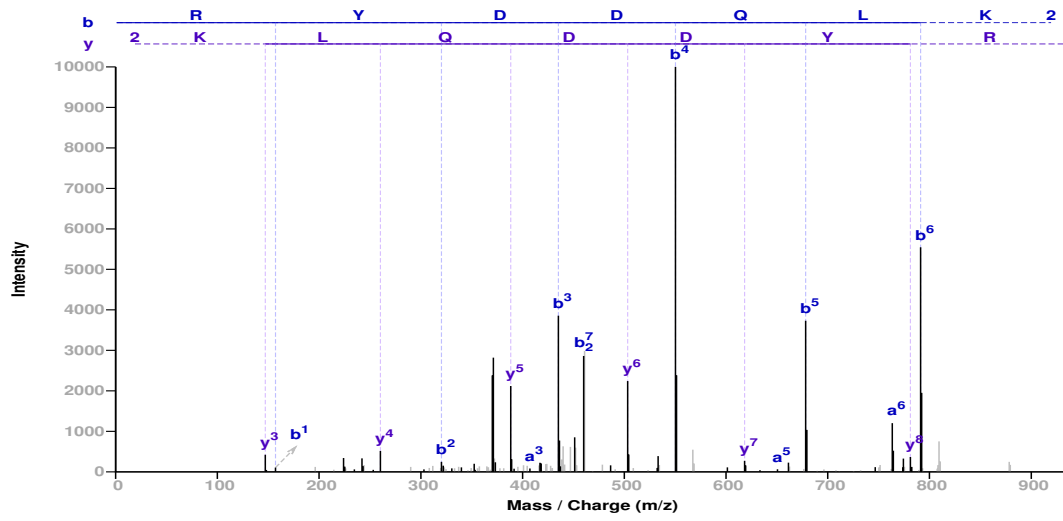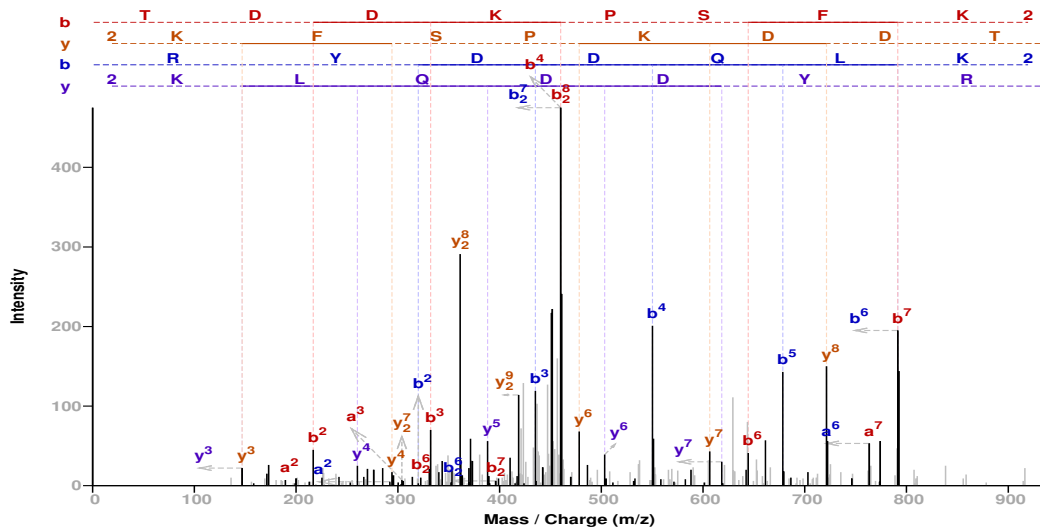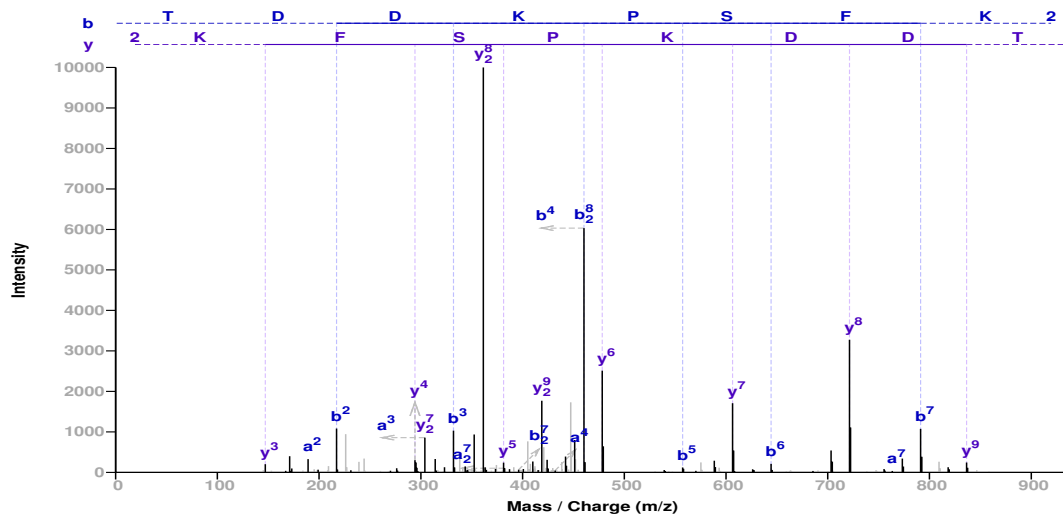

yeast00\_Scan\_Number\_3692 Precursor m/z: 717.355 cosine: 0.813  $\alpha$ : 0.844

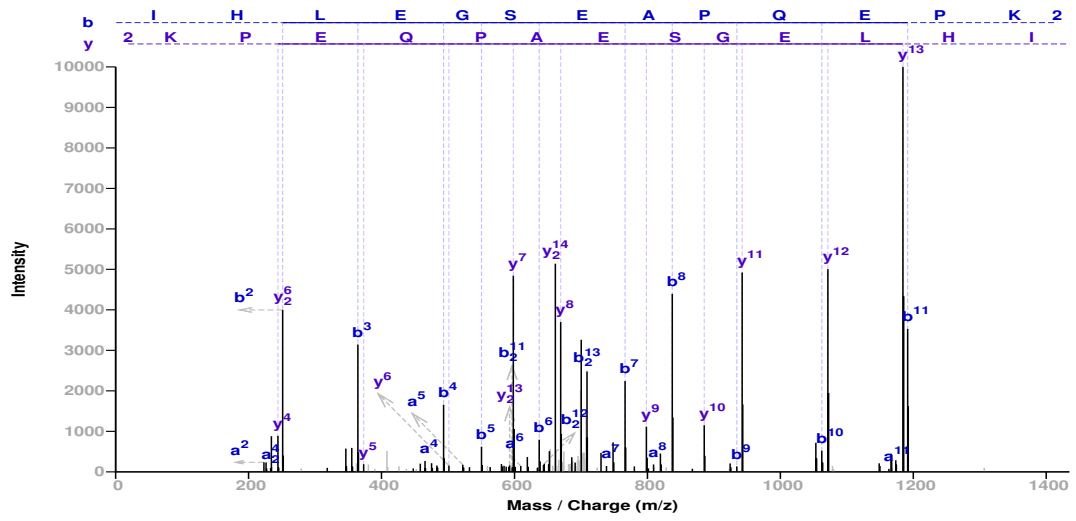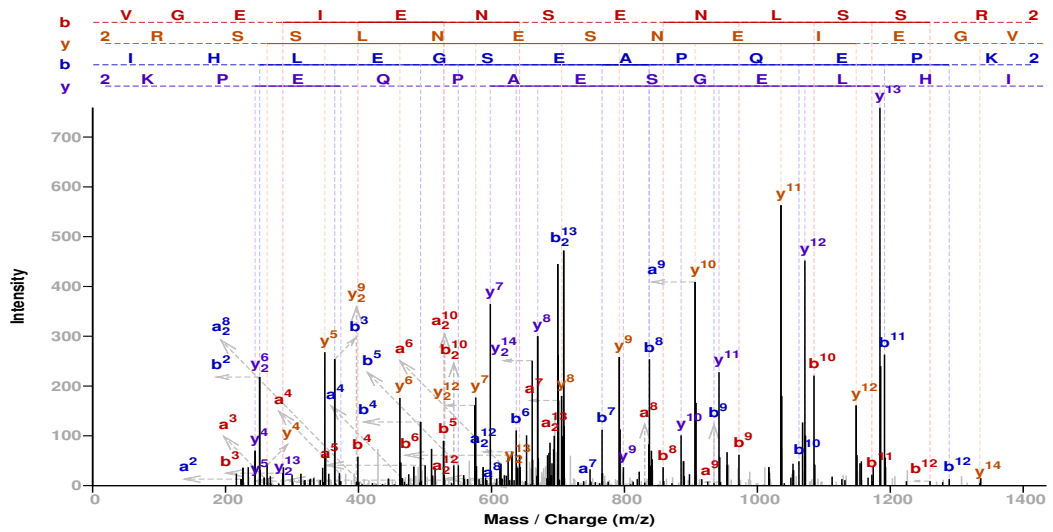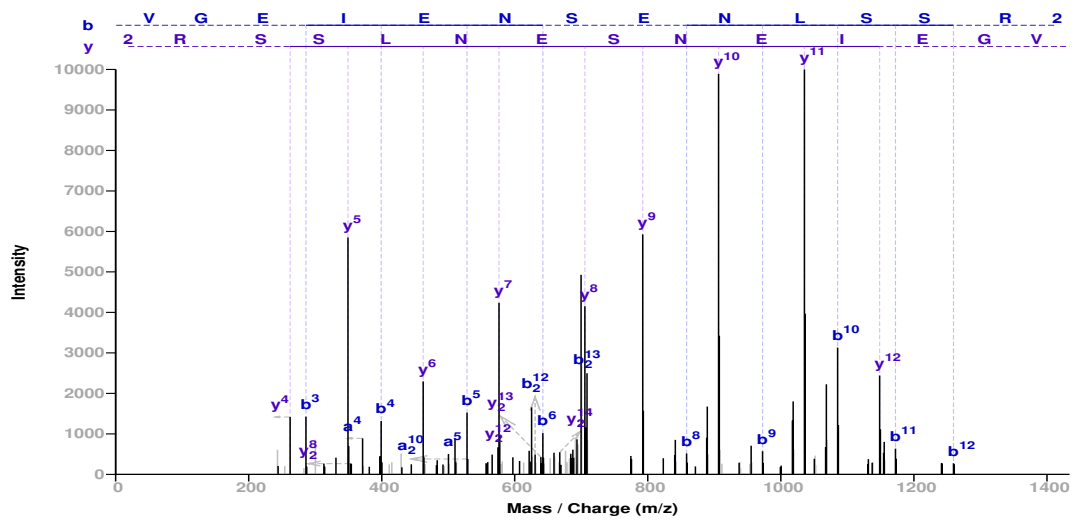

yeast00\_Scan\_Number\_3937 Precursor m/z: 578.855 cosine: 0.771  $\alpha$ : 0.832

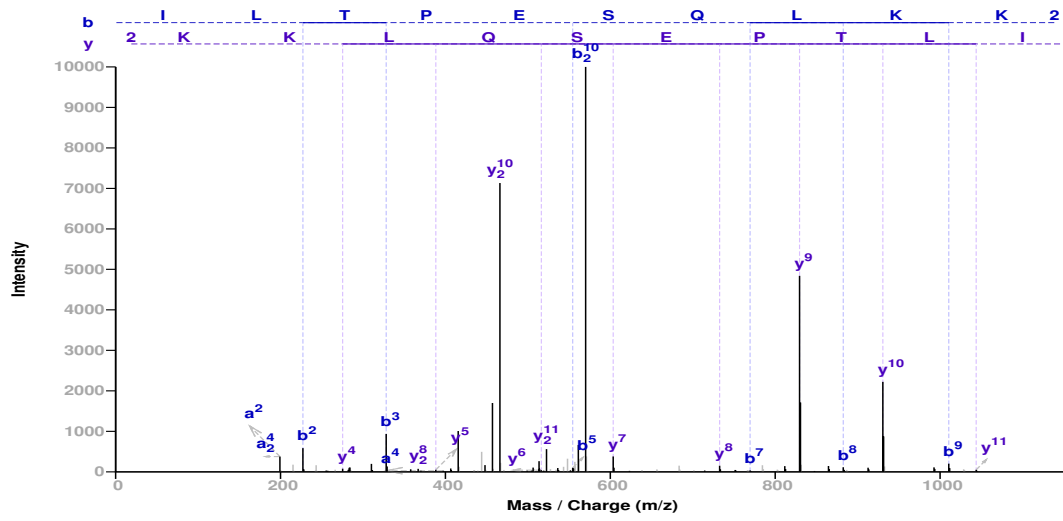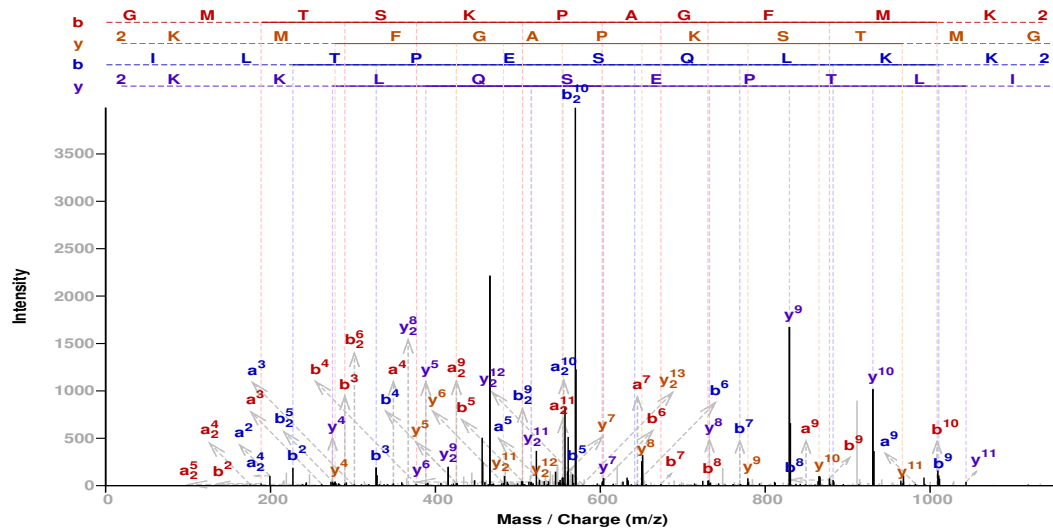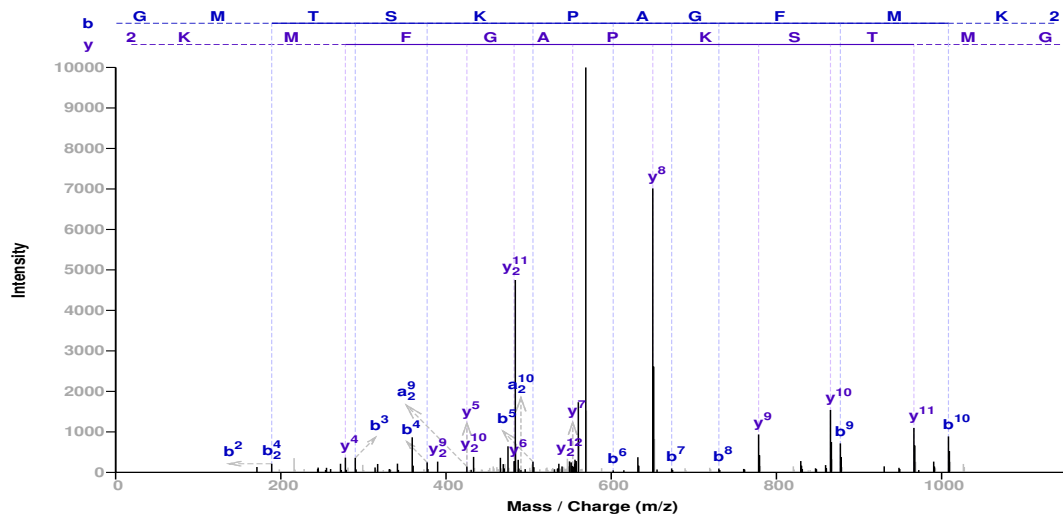

yeast00\_Scan\_Number\_4780 Precursor m/z: 714.851 cosine: 0.788  $\alpha$ : 0.822

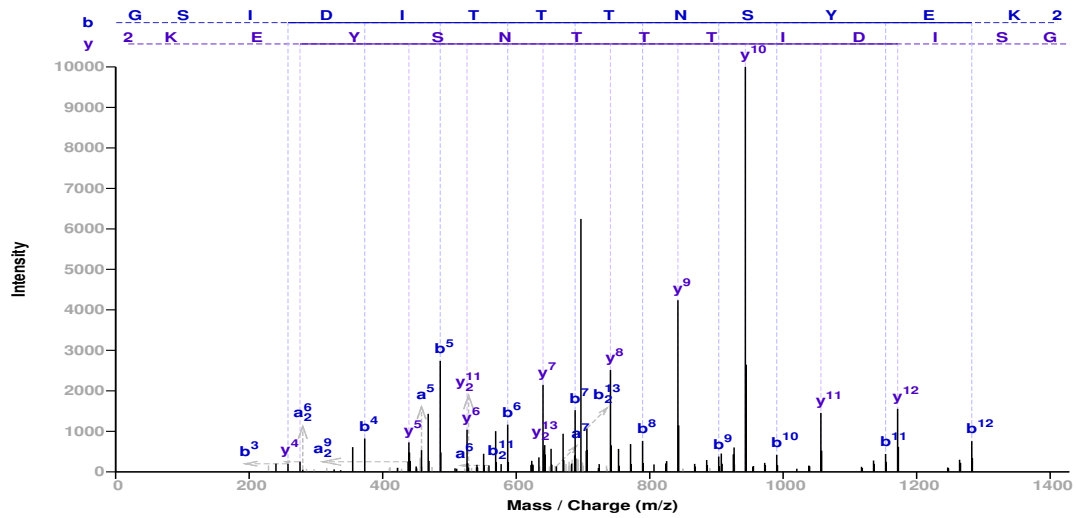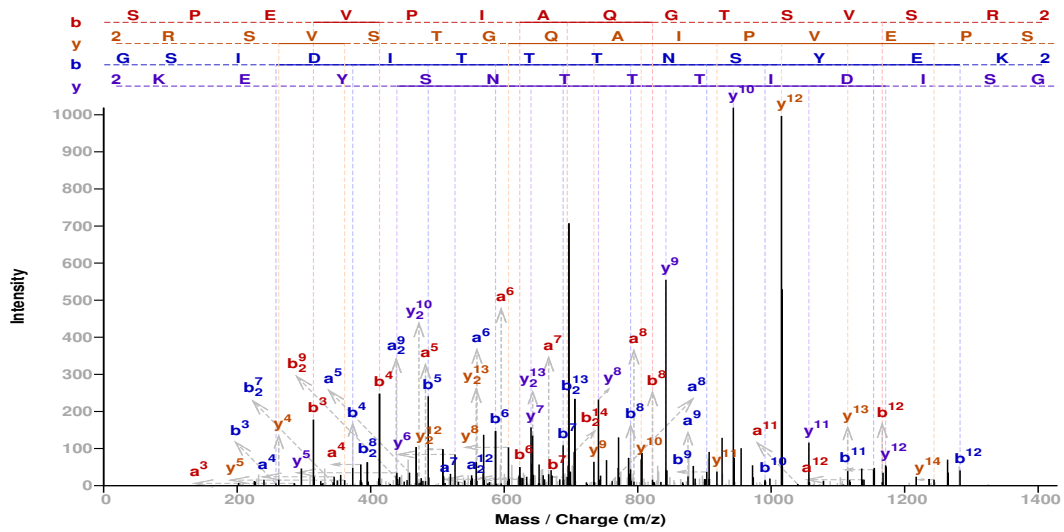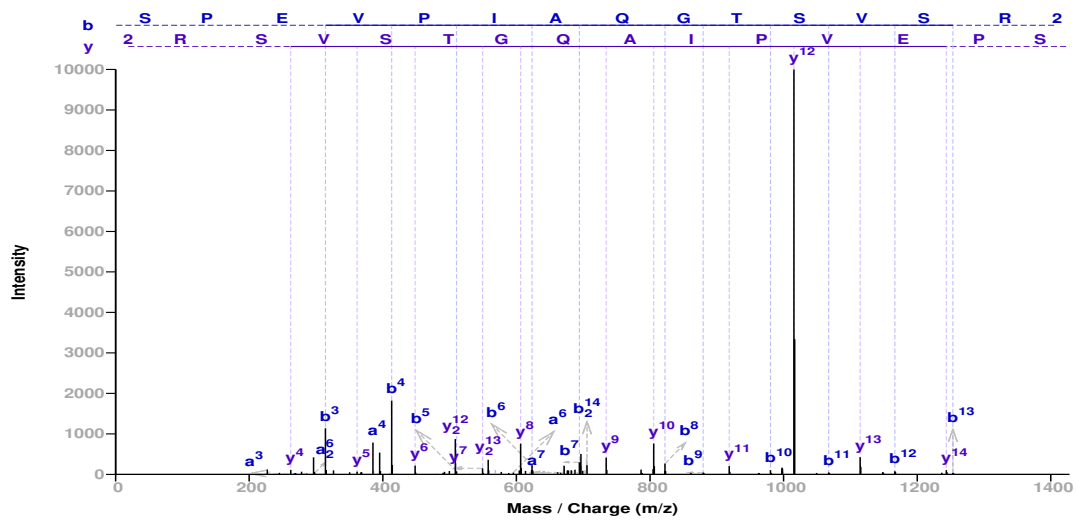



yeast00\_Scan\_Number\_2080 Precursor m/z: 622.363 cosine: 0.824  $\alpha$ : 0.815

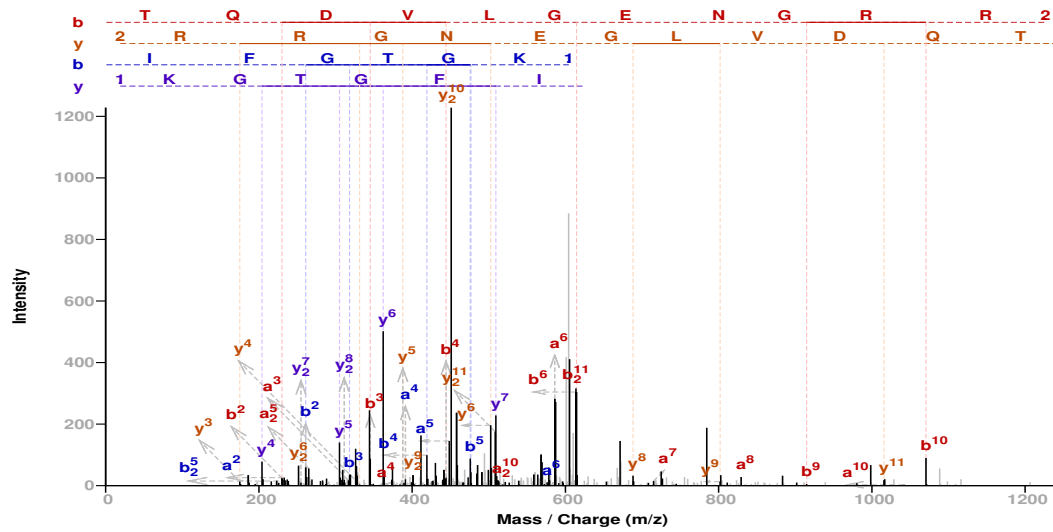

yeast00.Scan\_Number\_2610 Precursor m/z: 561.838 cosine: 0.752  $\alpha$ : 0.813

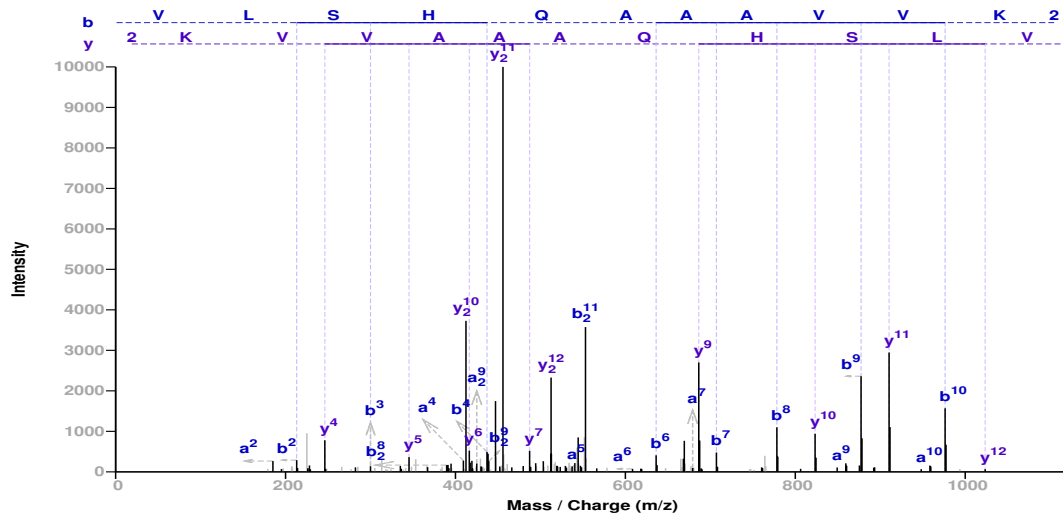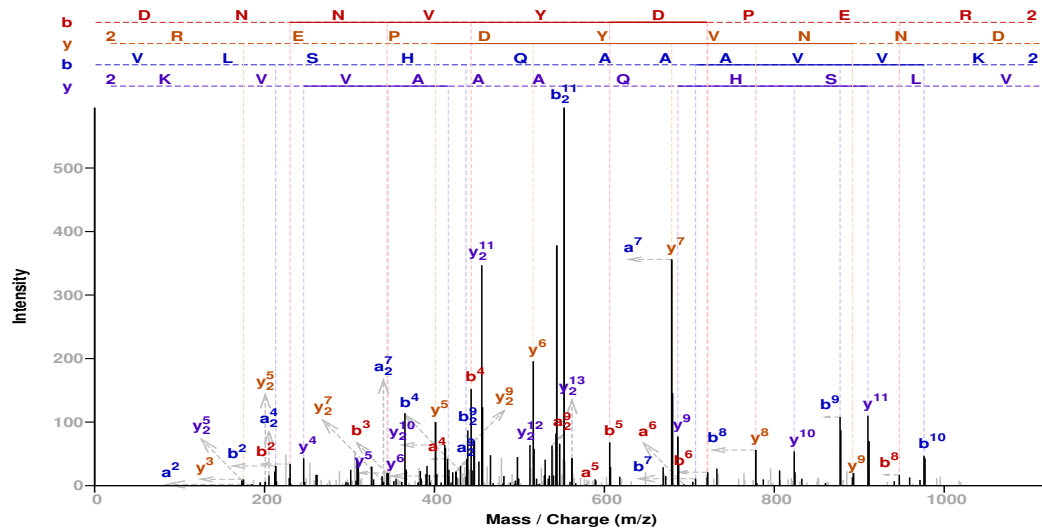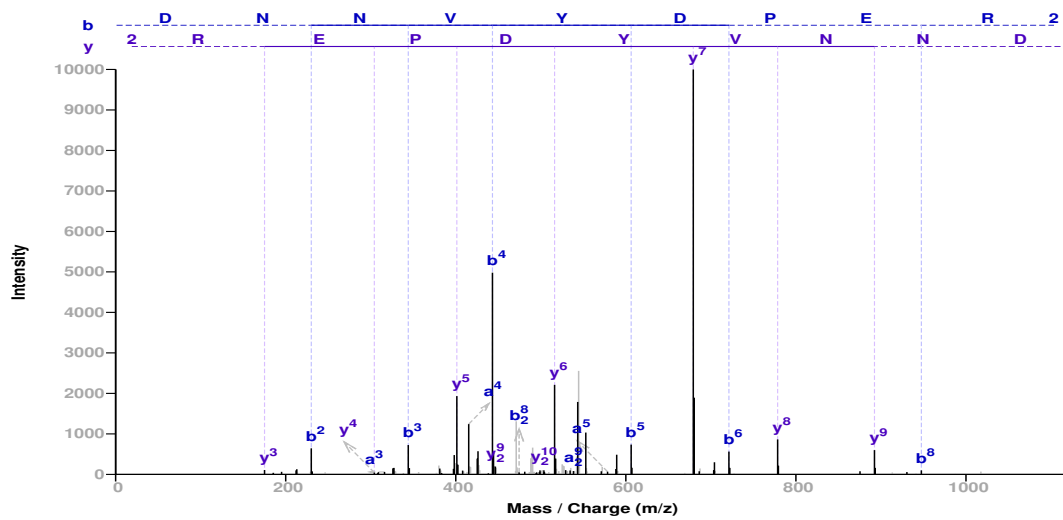

yeast00\_Scan\_Number\_831 Precursor m/z: 395.869 cosine: 0.726  $\alpha$ : 0.807

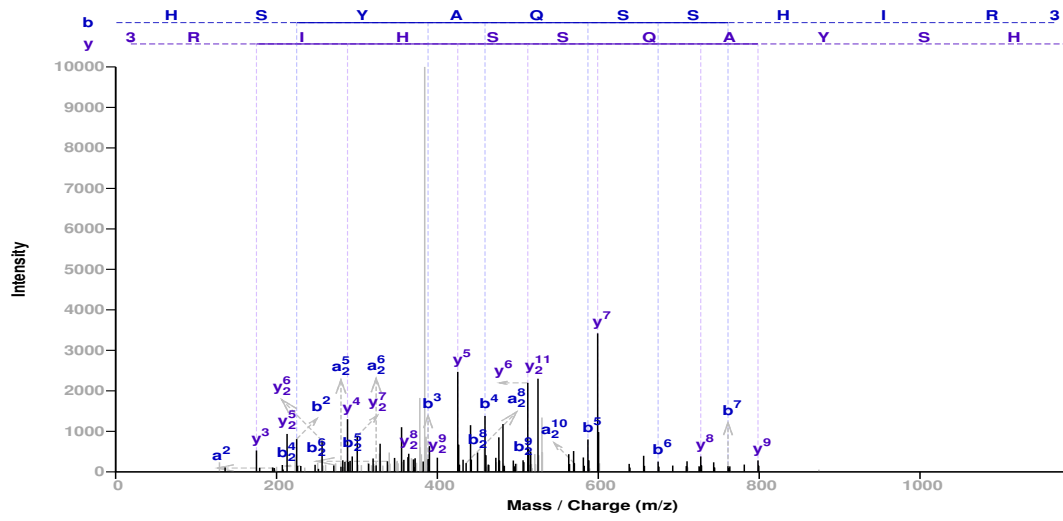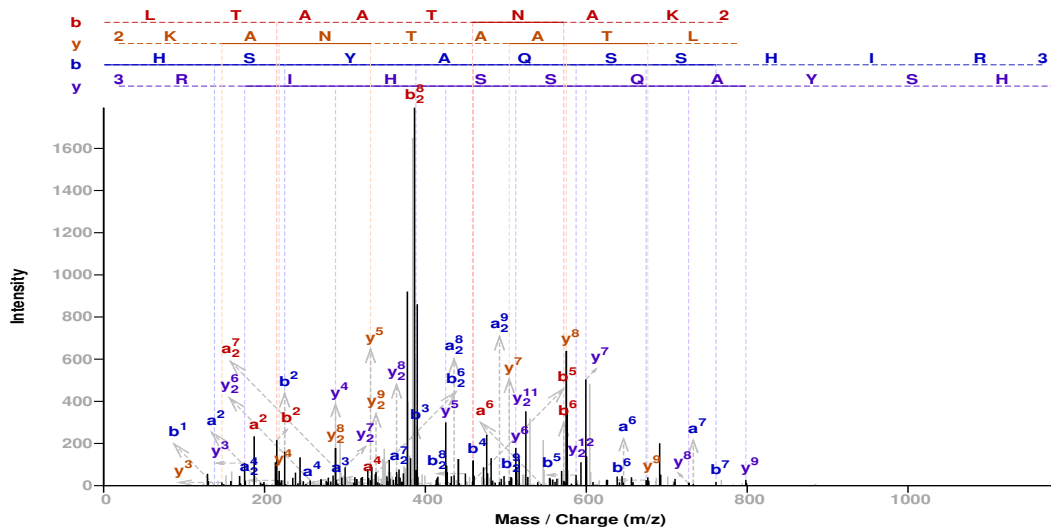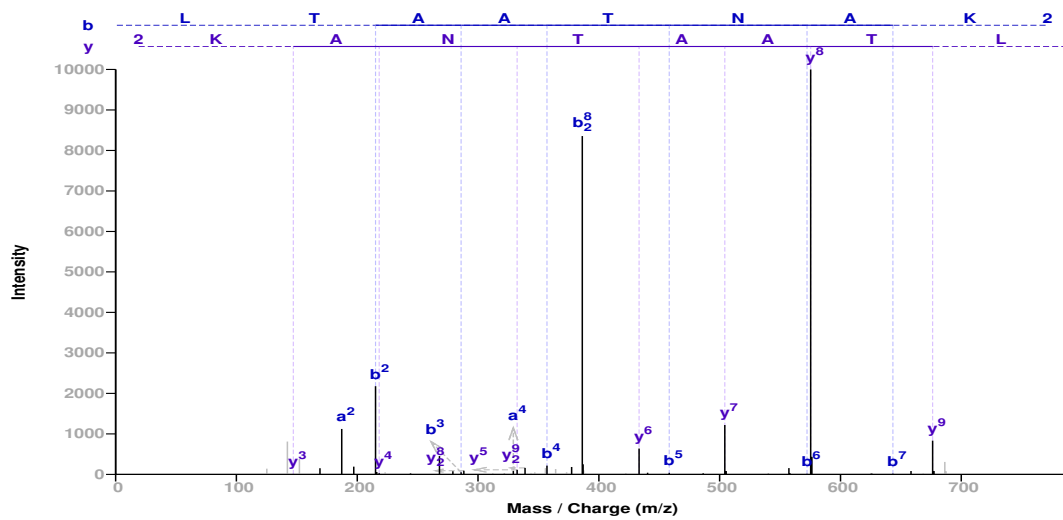



yeast00\_Scan\_Number\_2222 Precursor m/z: 373.231 cosine: 0.855  $\alpha$ : 0.801

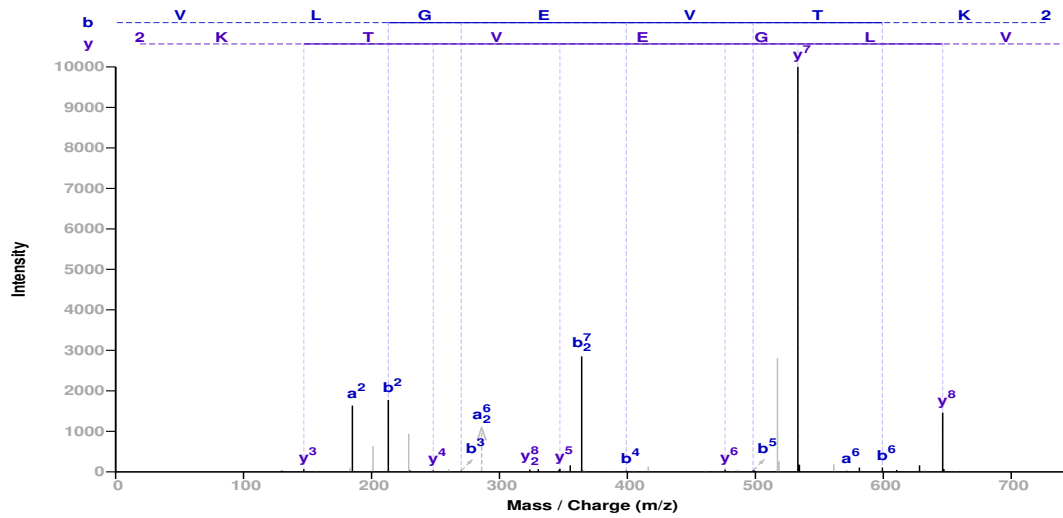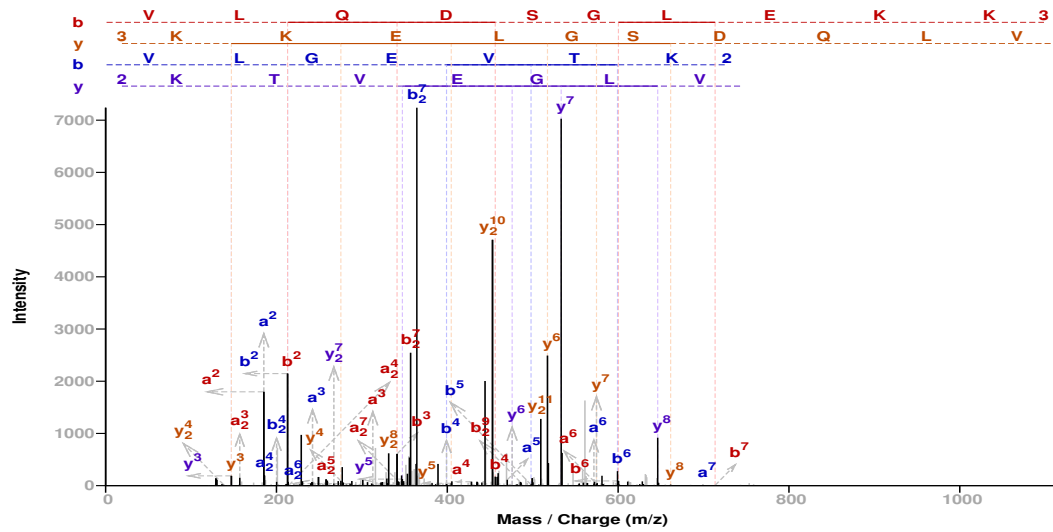

yeast00\_Scan\_Number\_5939 Precursor m/z: 546.785 cosine: 0.856  $\alpha$ : 0.800

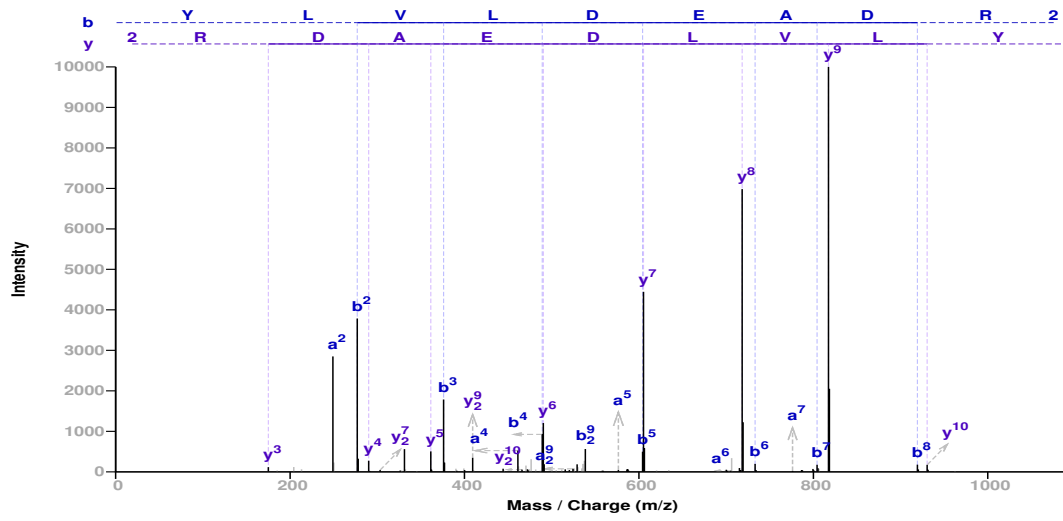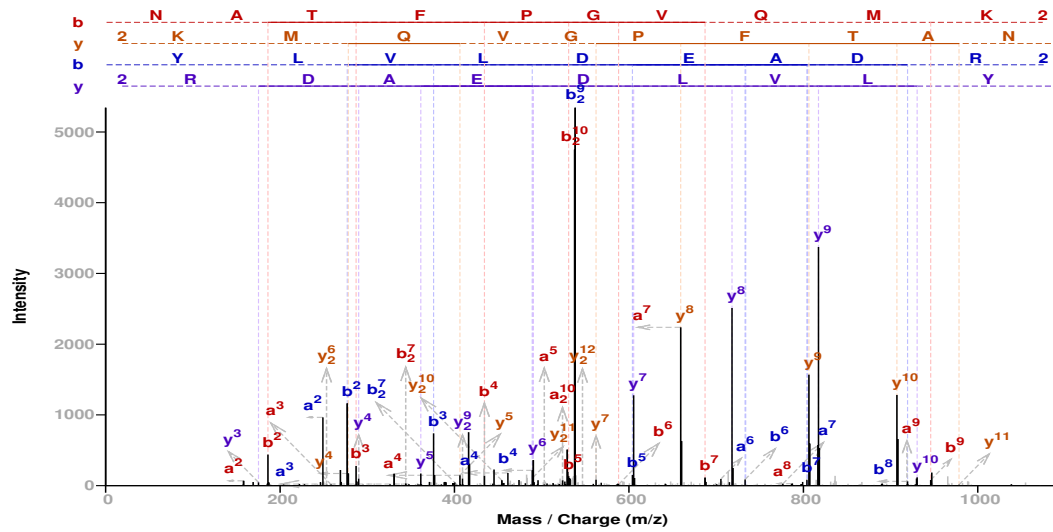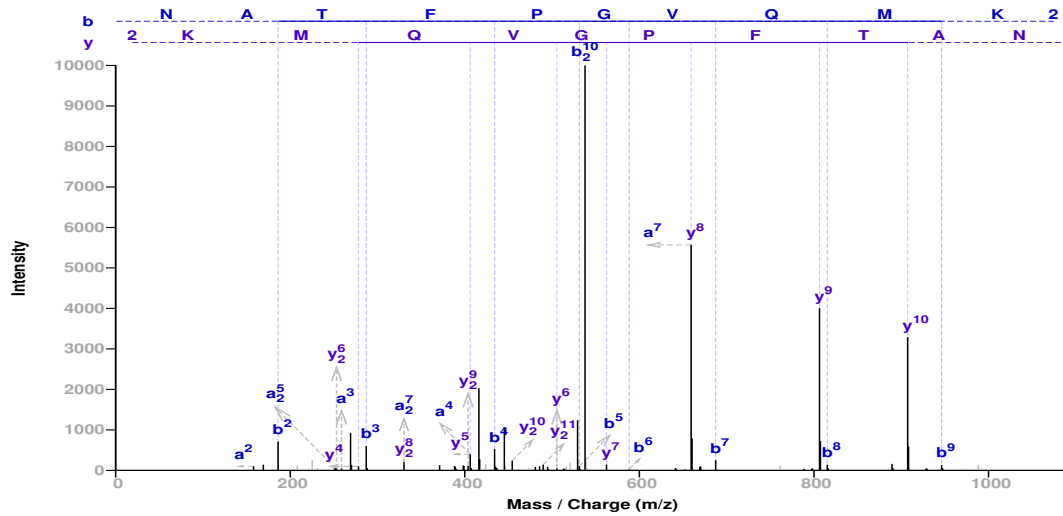

yeast00\_Scan\_Number\_5955 Precursor m/z: 557.301 cosine: 0.775  $\alpha$ : 0.798

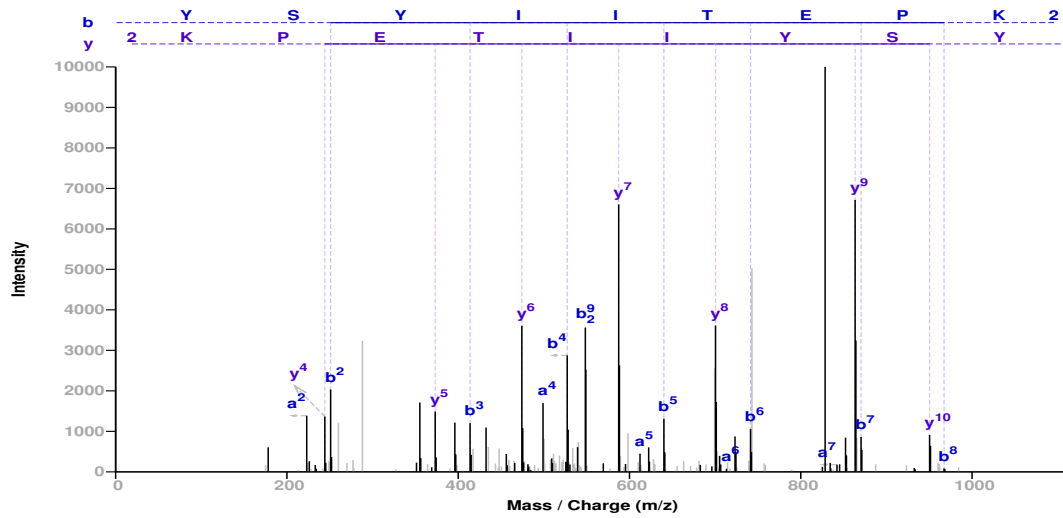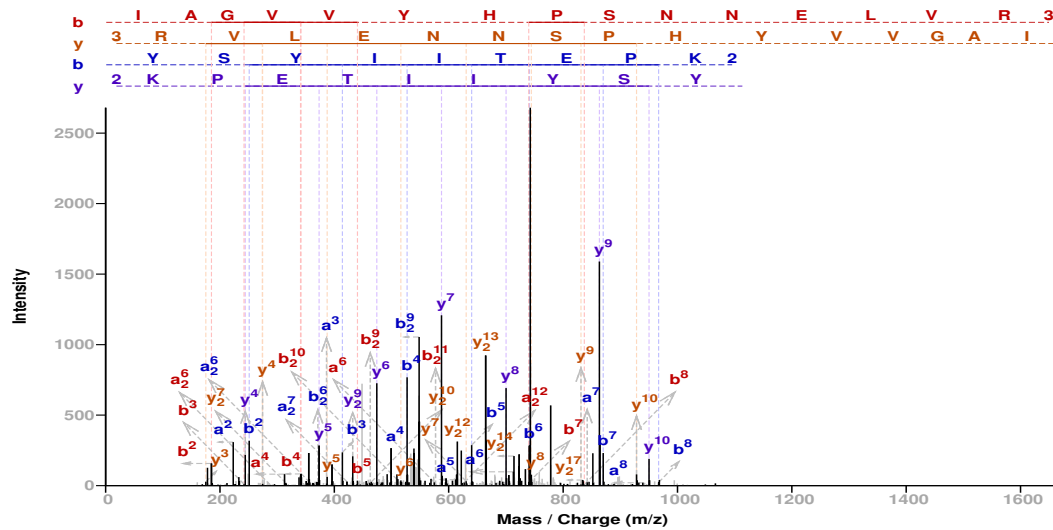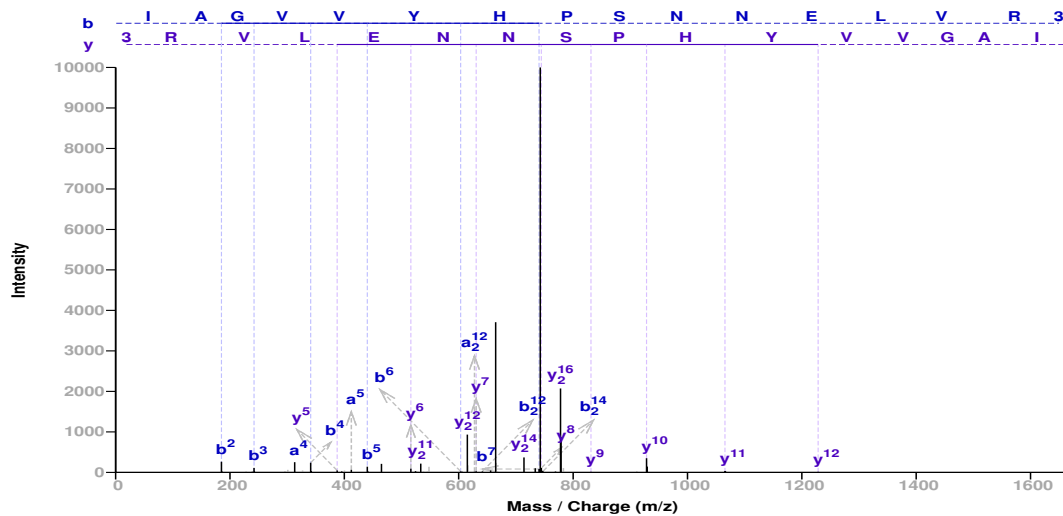

yeast00\_Scan\_Number\_1332 Precursor m/z: 406.556 cosine: 0.796  $\alpha$ : 0.787

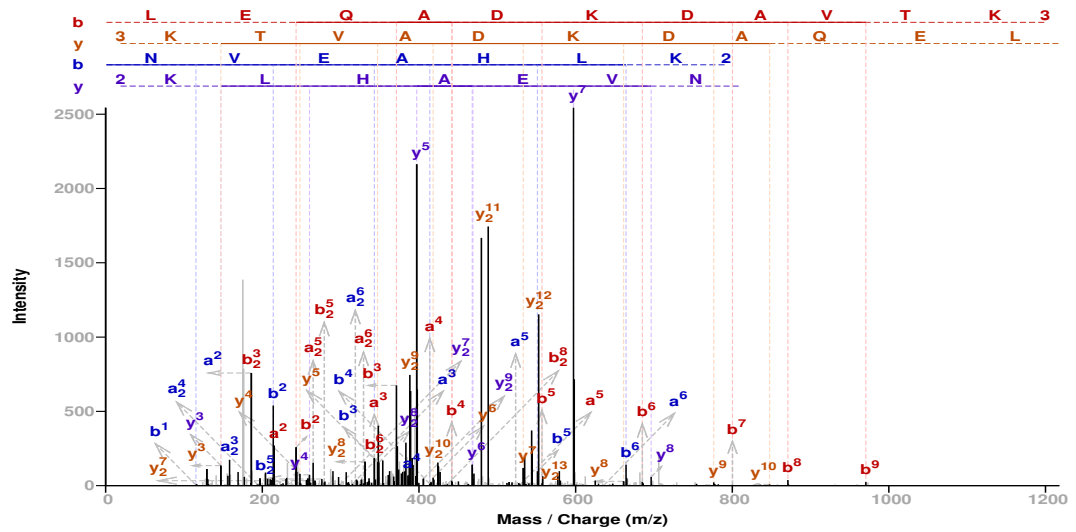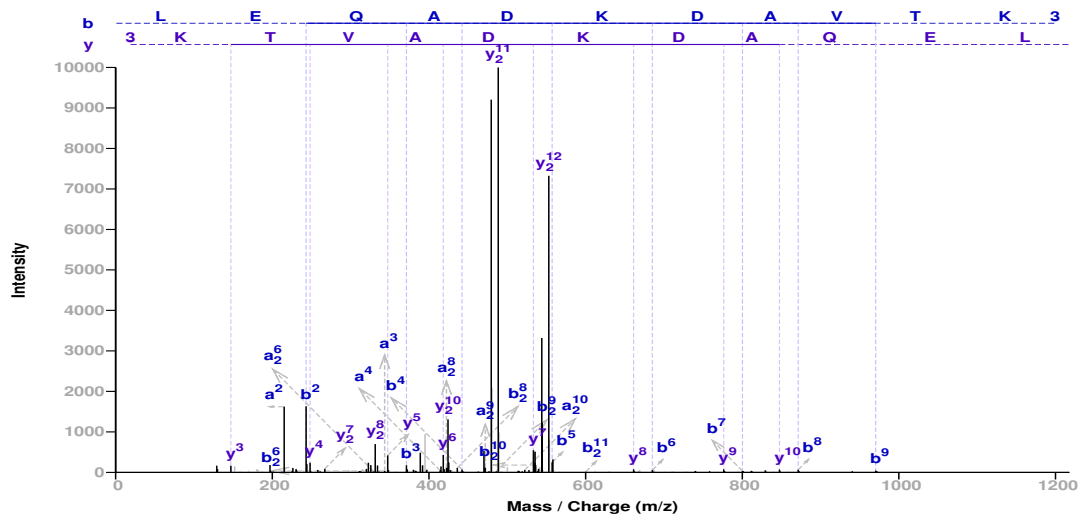



yeast00\_Scan\_Number\_6222 Precursor m/z: 443.267 cosine: 0.775  $\alpha$ : 0.780

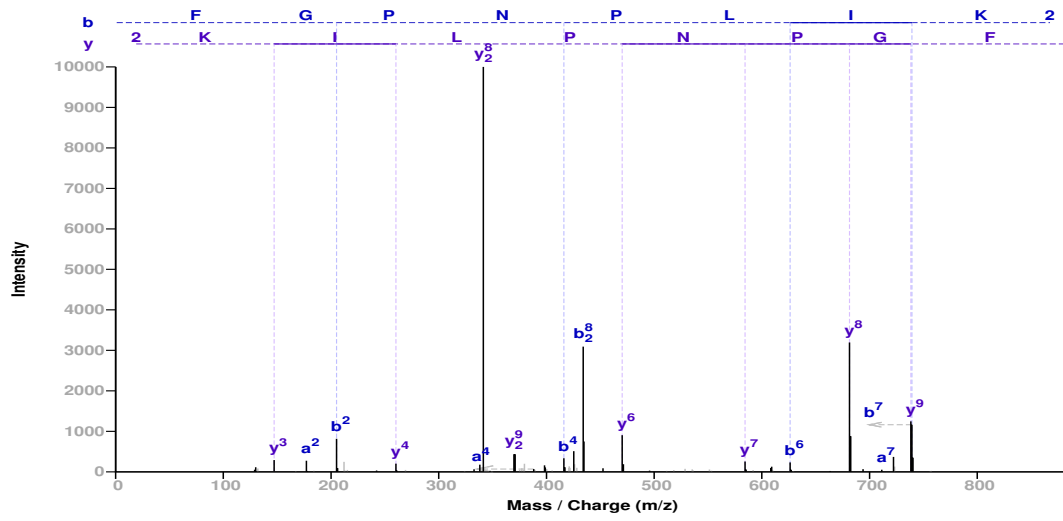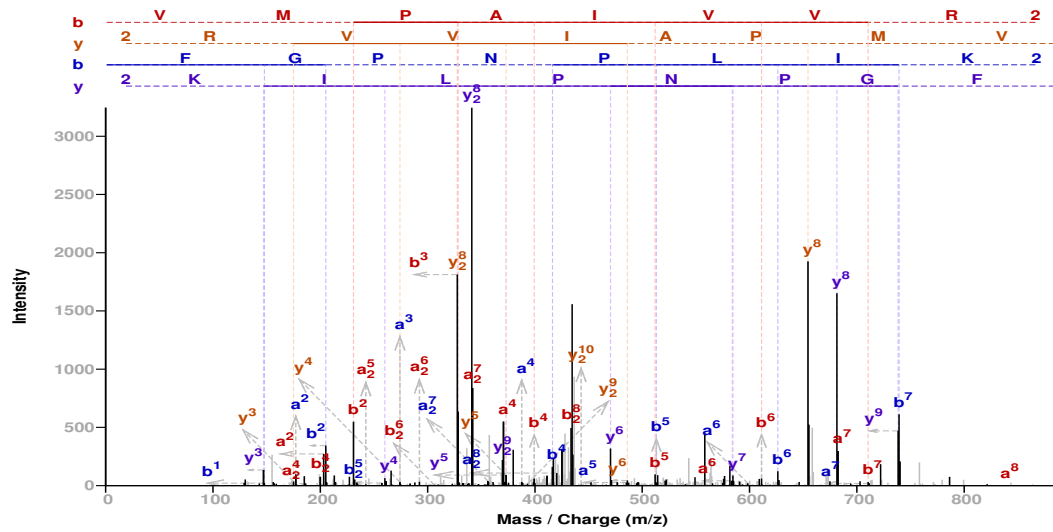



yeast00\_Scan\_Number\_5260 Precursor m/z: 438.258 cosine: 0.727  $\alpha$ : 0.773

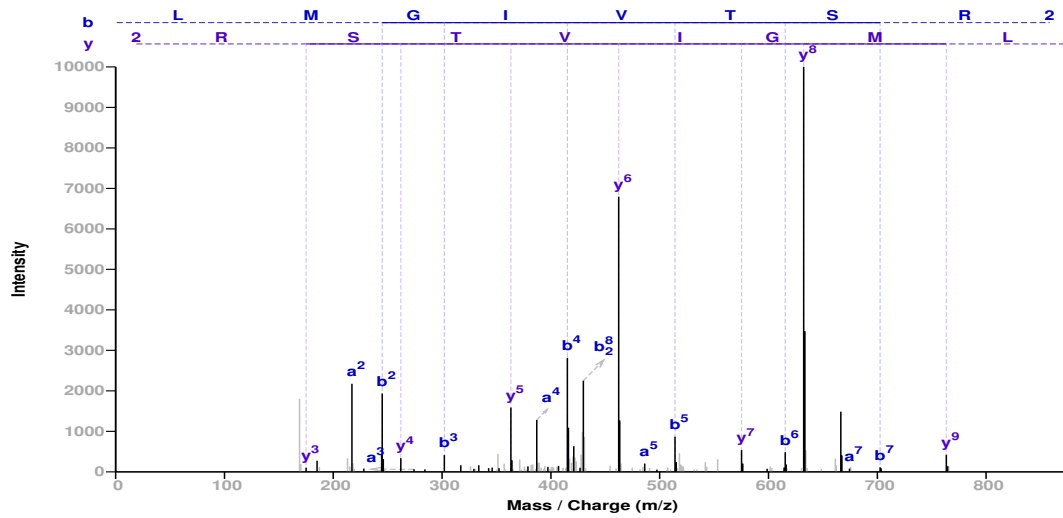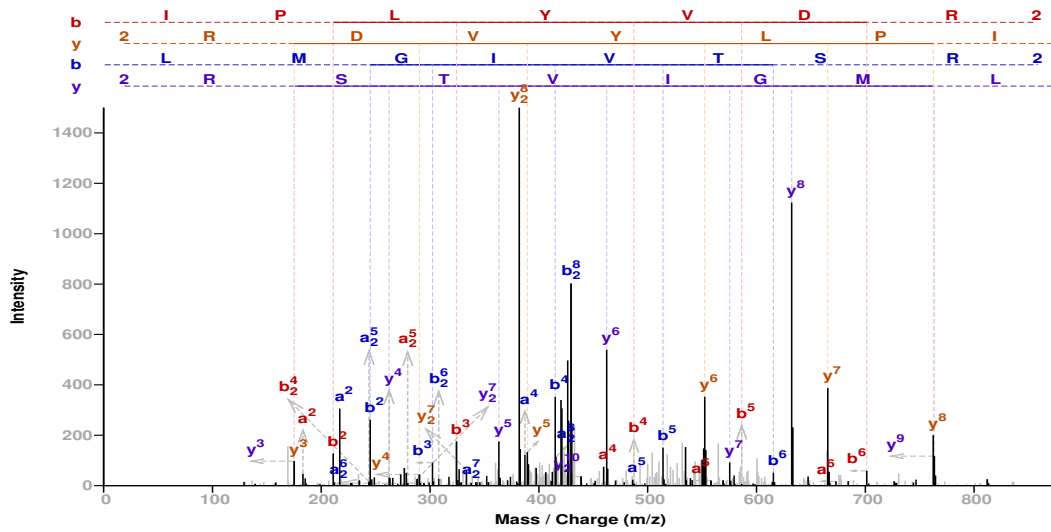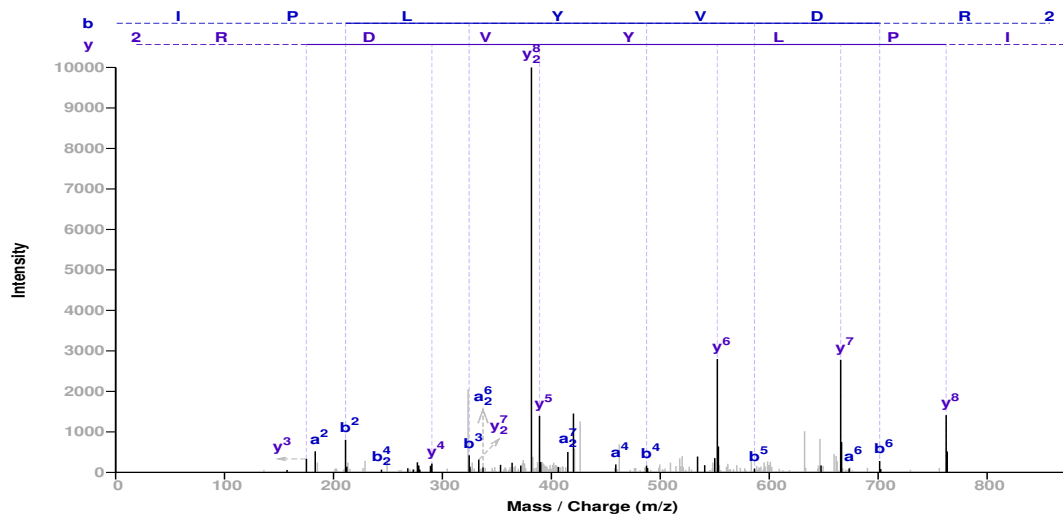

yeast00\_Scan\_Number\_4710 Precursor m/z: 459.270 cosine: 0.738  $\alpha$ : 0.769

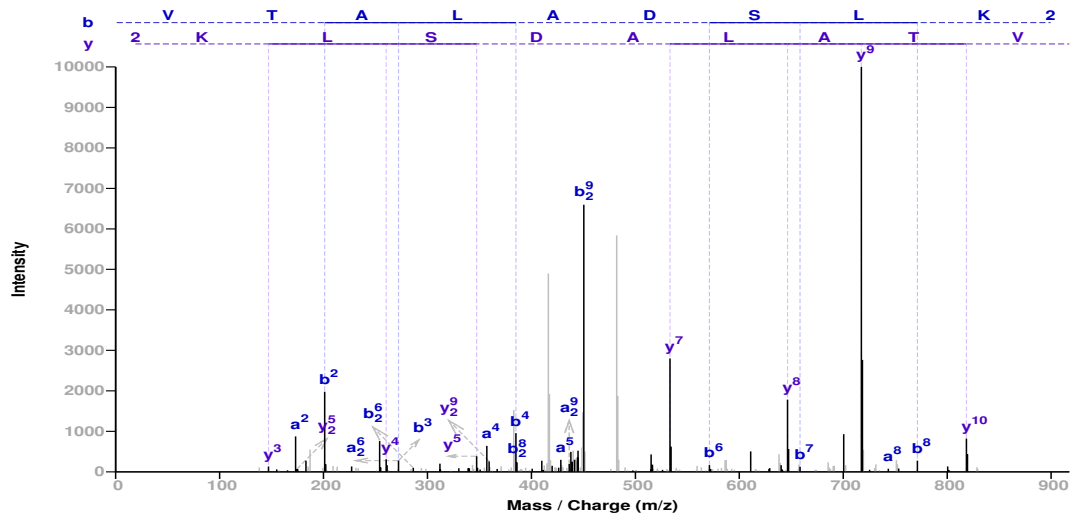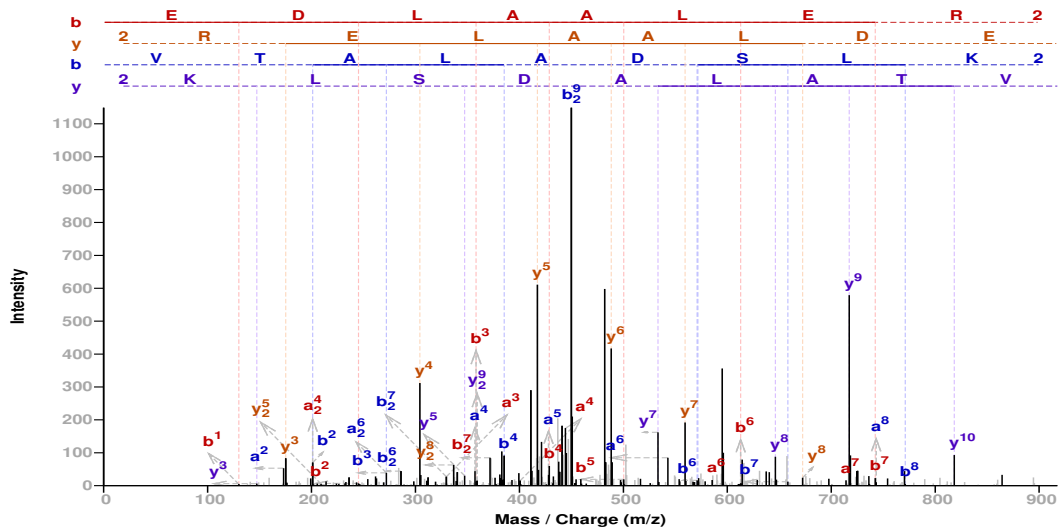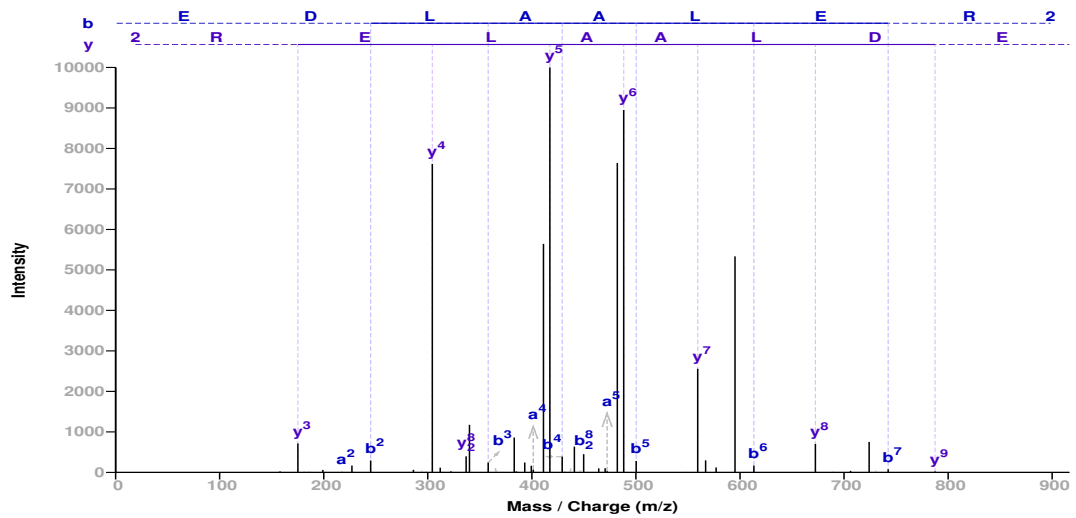

yeast00\_Scan\_Number\_3954 Precursor m/z: 577.795 cosine: 0.871  $\alpha$ : 0.763

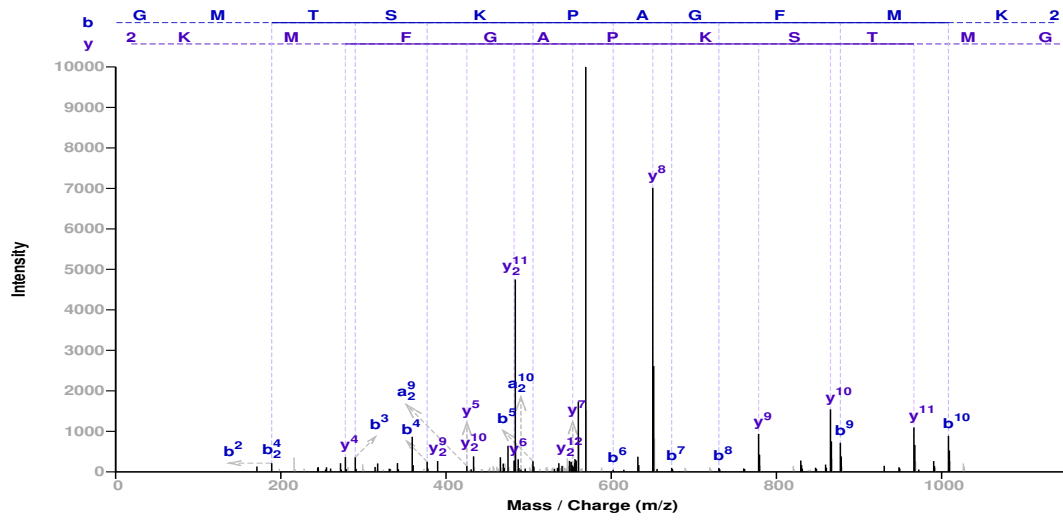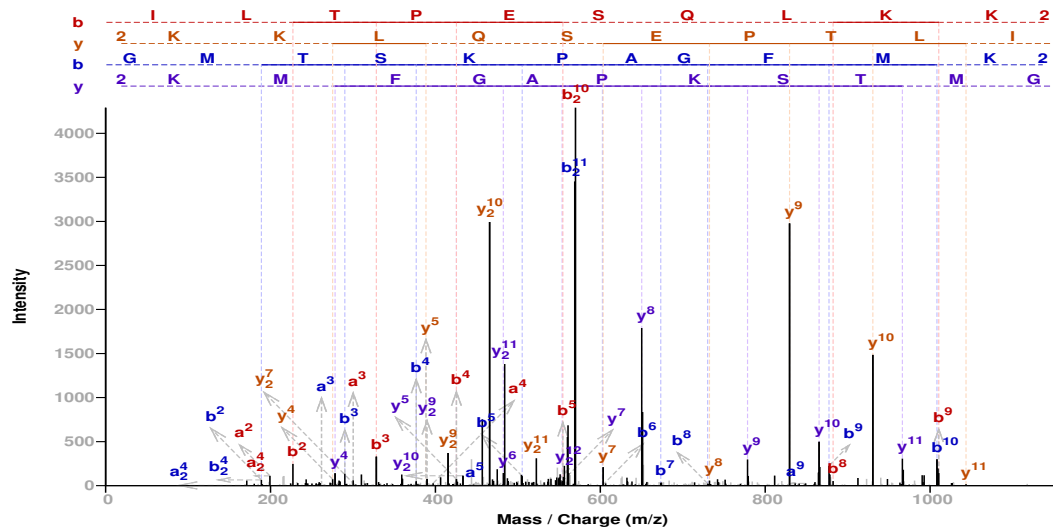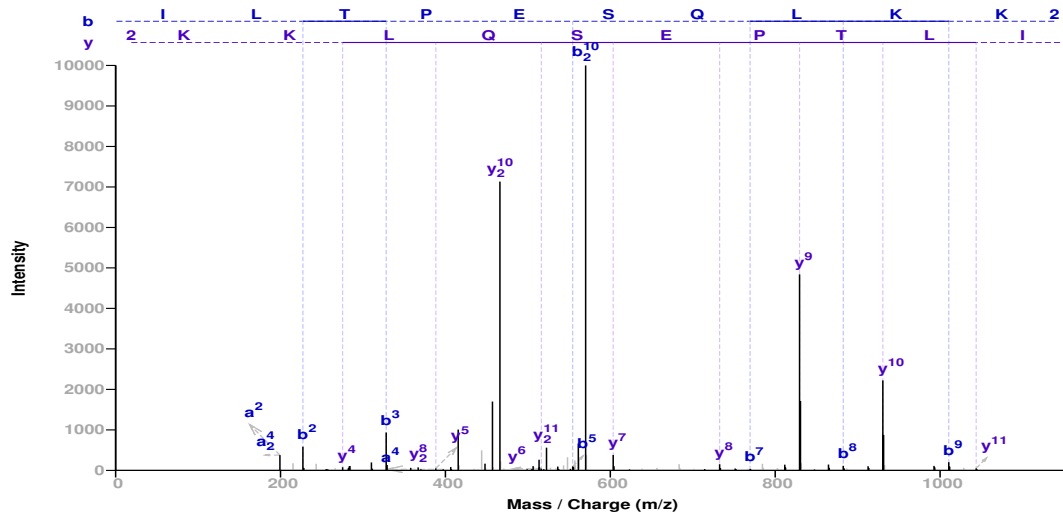

yeast00\_Scan\_Number\_8293 Precursor m/z: 670.683 cosine: 0.809  $\alpha$ : 0.761

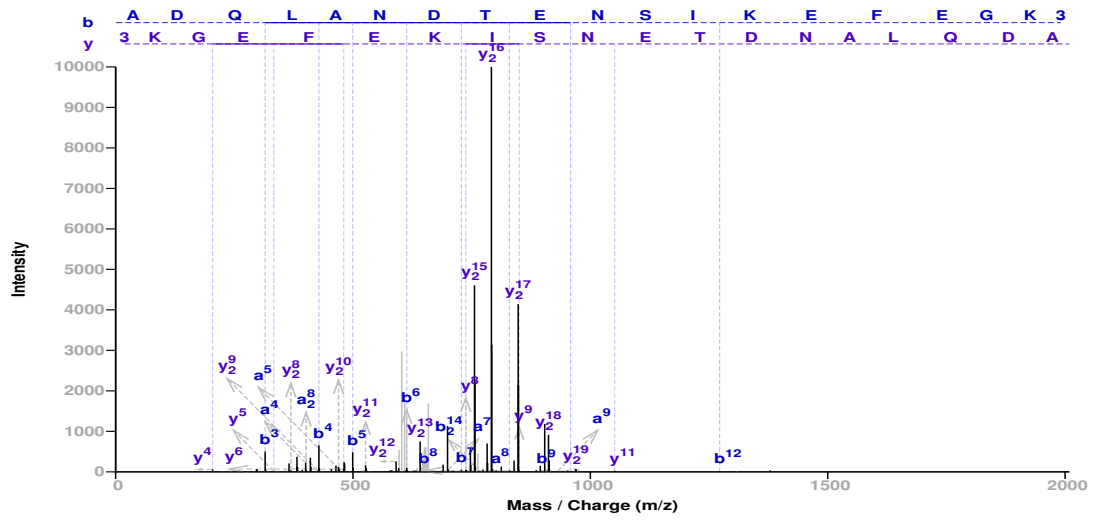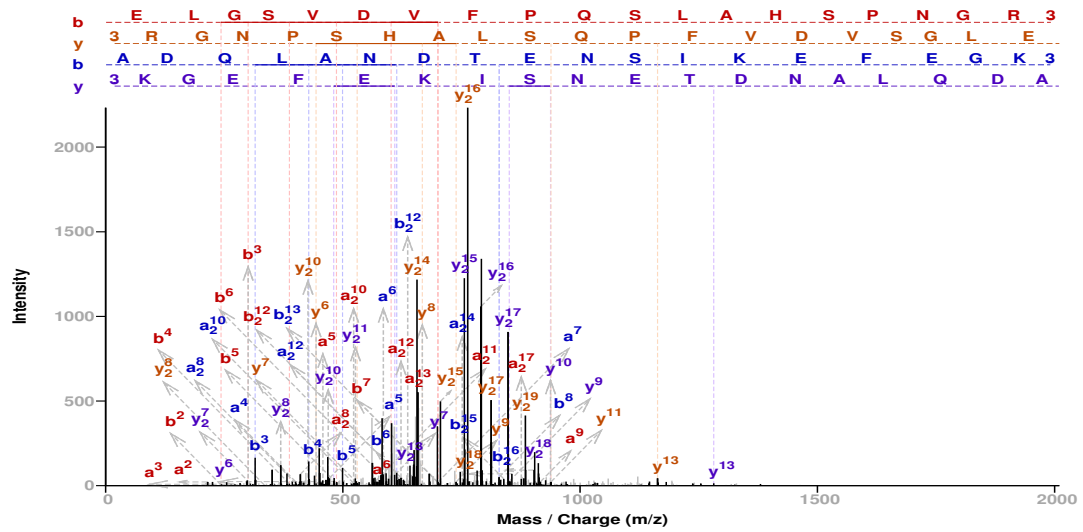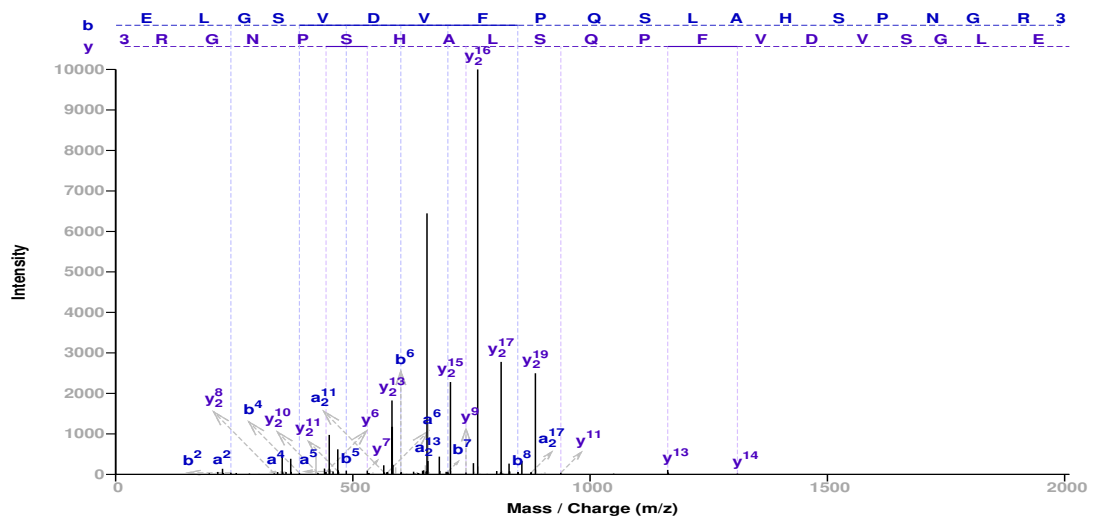

yeast00.Scan\_Number\_3013 Precursor m/z: 467.588 cosine: 0.806  $\alpha$ : 0.752

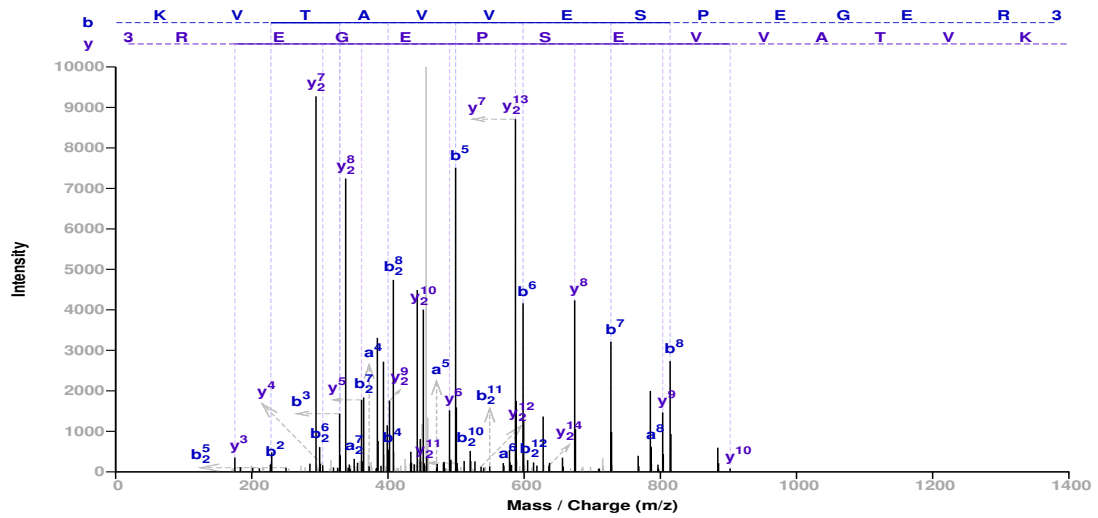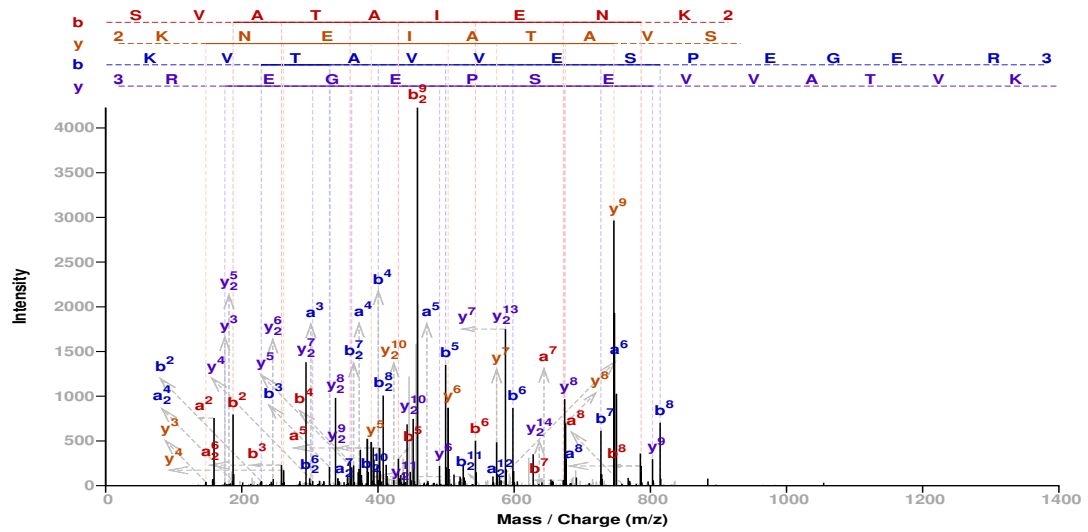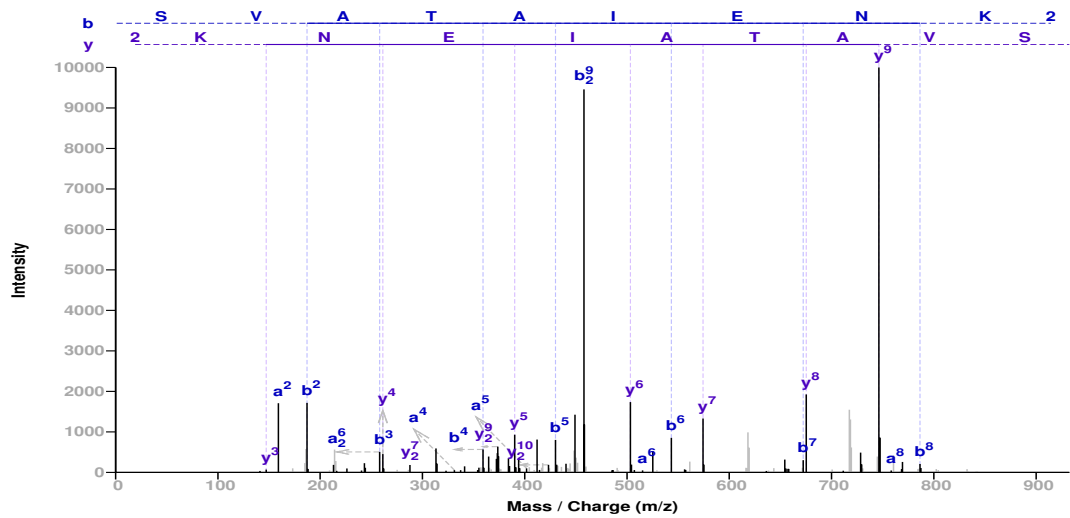

yeast00\_Scan\_Number\_3237 Precursor m/z: 530.317 cosine: 0.796  $\alpha$ : 0.740

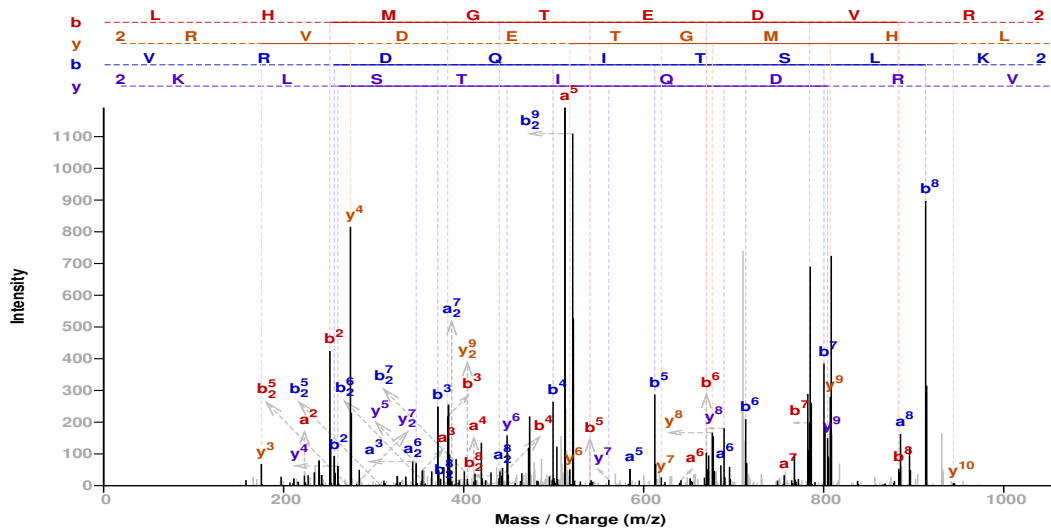



yeast00.Scan\_Number\_6117 Precursor m/z: 428.899 cosine: 0.770  $\alpha$ : 0.737

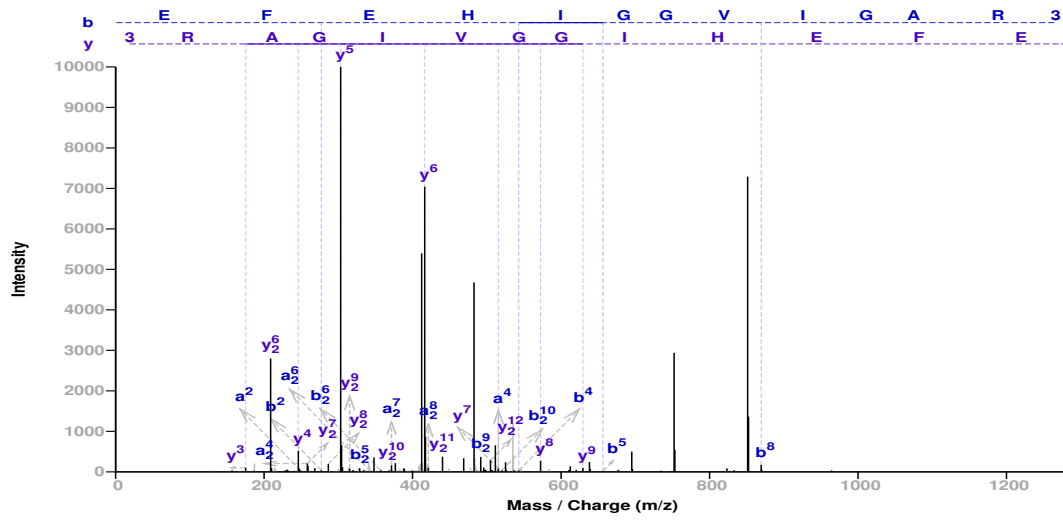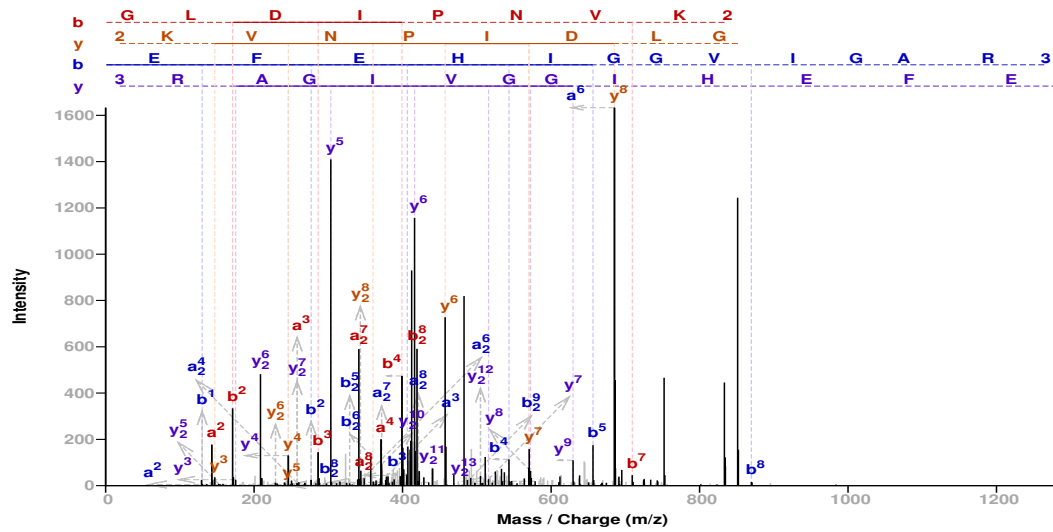

yeast00\_Scan\_Number\_3746 Precursor m/z: 412.207 cosine: 0.727  $\alpha$ : 0.736

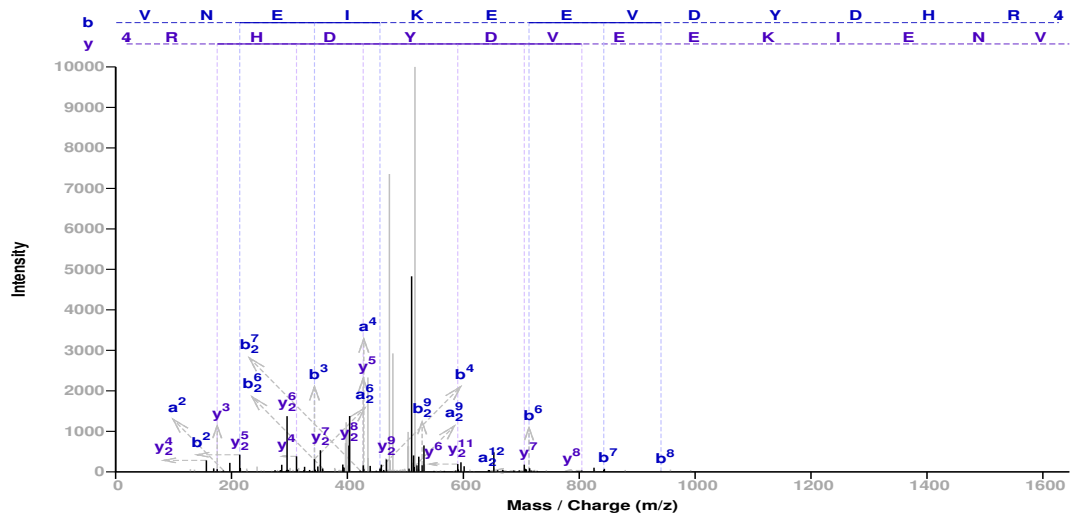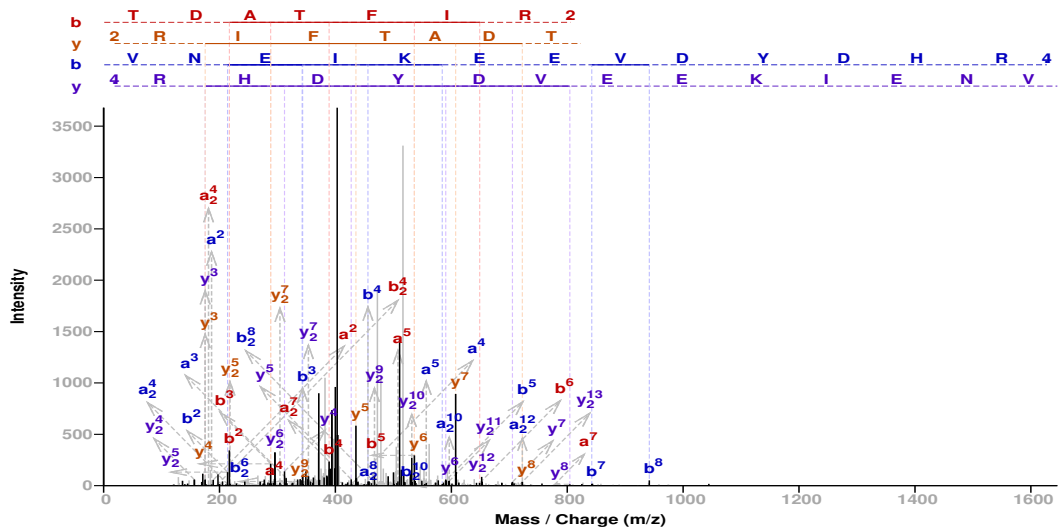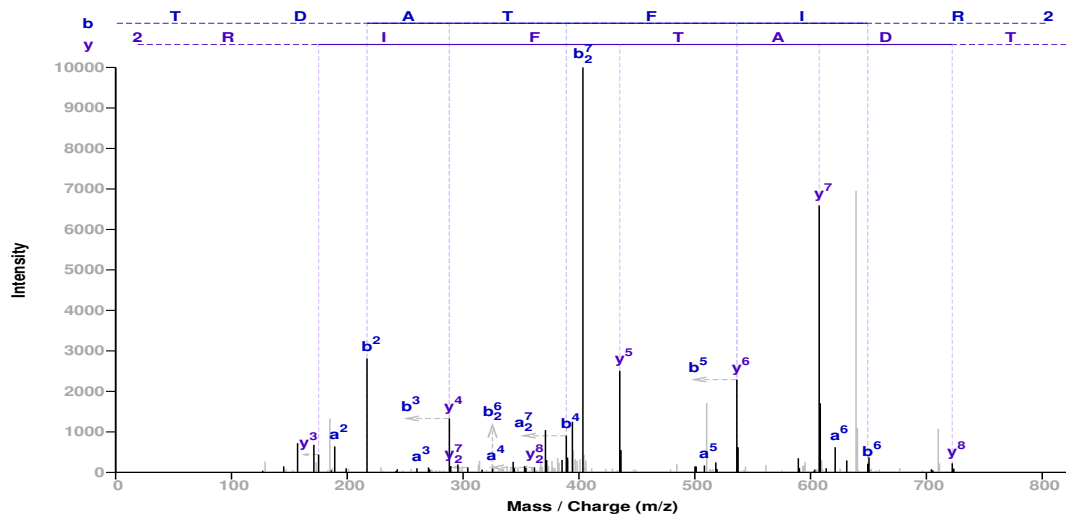

yeast00.Scan\_Number\_2462 Precursor m/z: 467.744 cosine: 0.911  $\alpha$ : 0.734

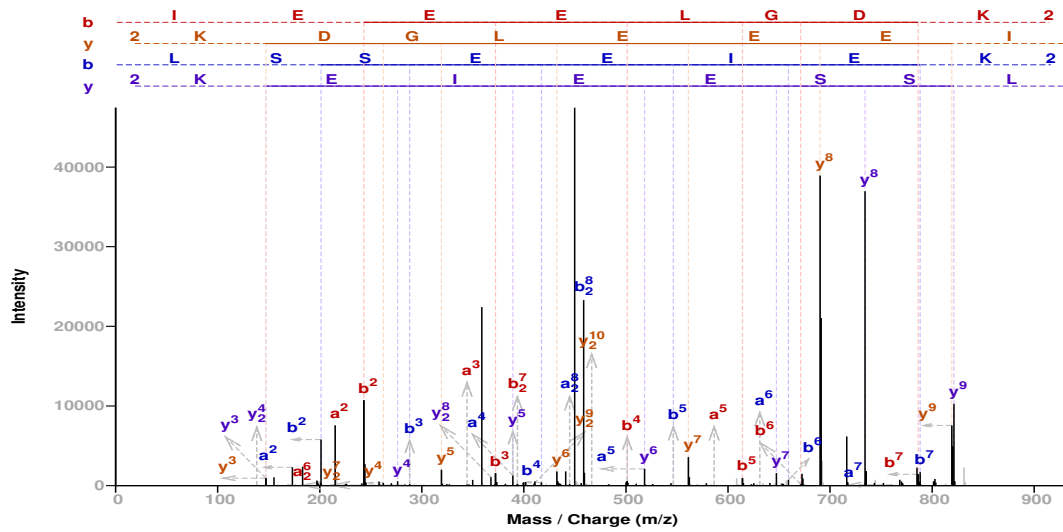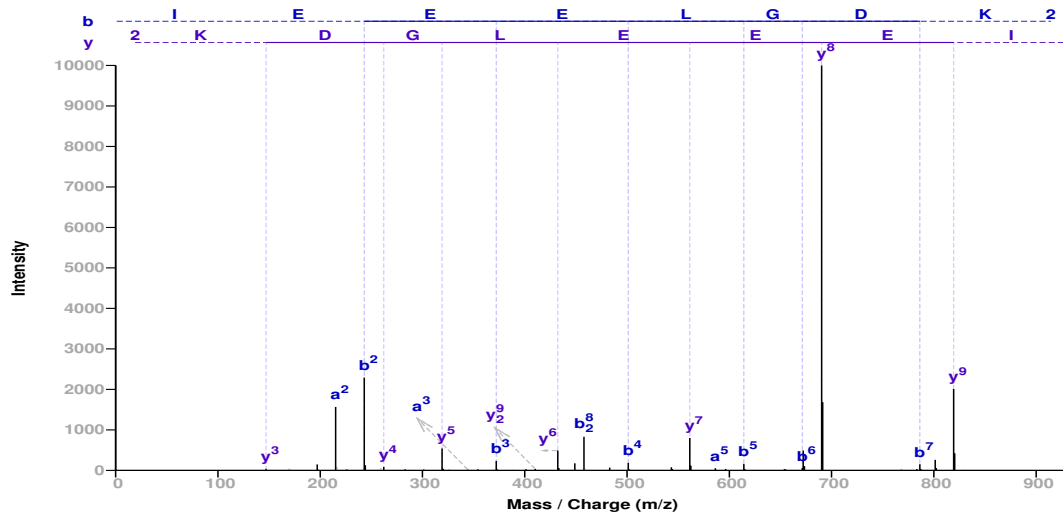

yeast00\_Scan\_Number\_5668 Precursor m/z: 736.896 cosine: 0.810  $\alpha$ : 0.731

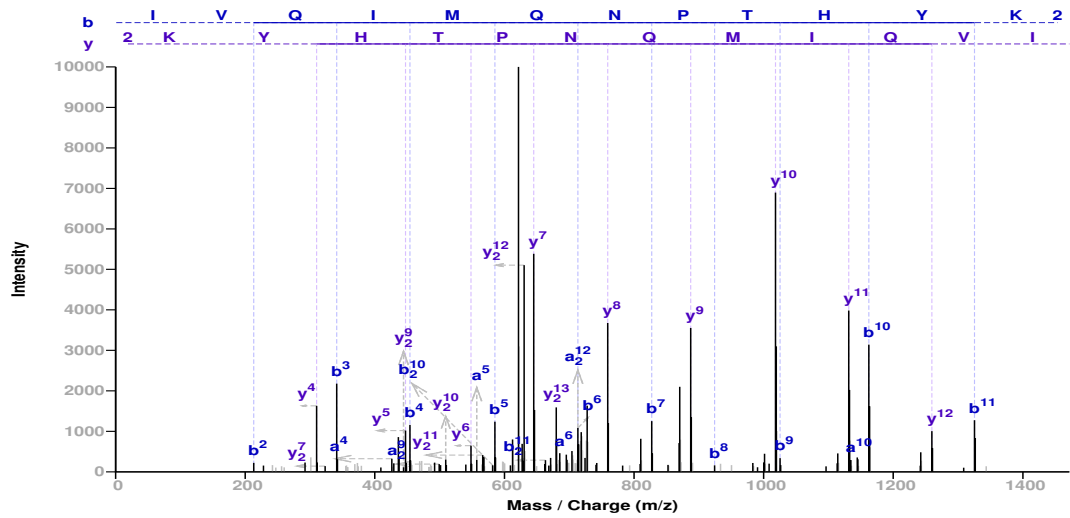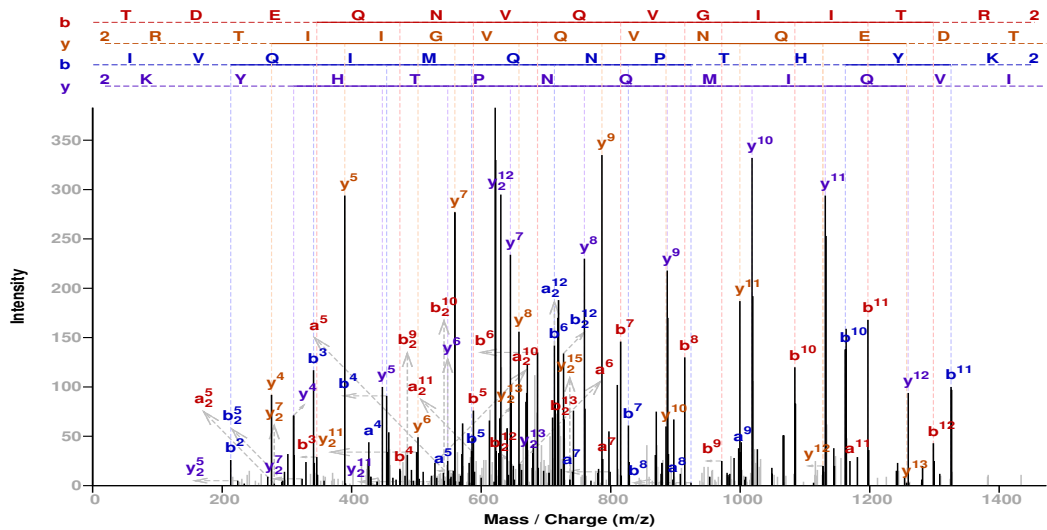

yeast00\_Scan\_Number\_6427 Precursor m/z: 536.796 cosine: 0.761  $\alpha$ : 0.722

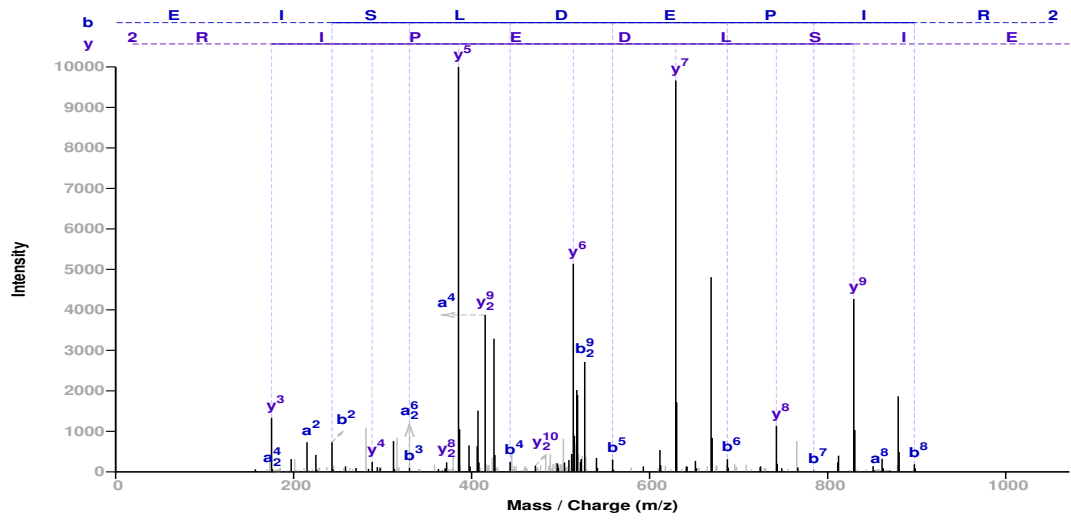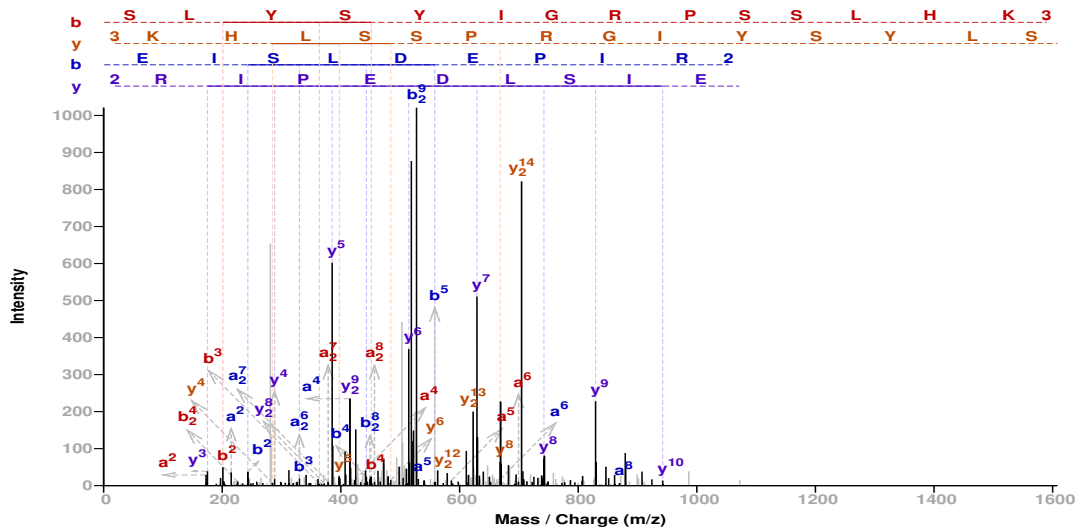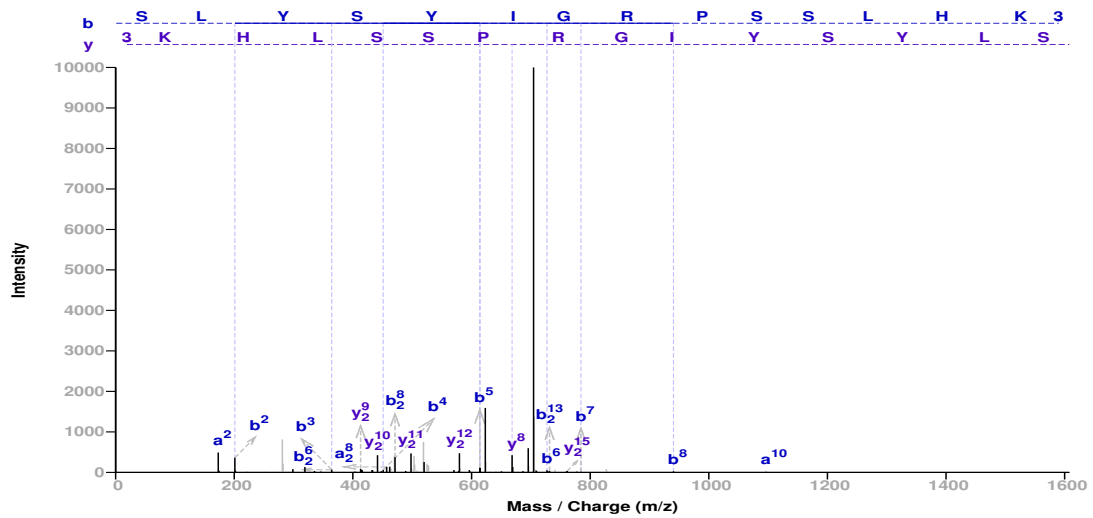

yeast00\_Scan\_Number\_2863 Precursor m/z: 495.256 cosine: 0.817  $\alpha$ : 0.720

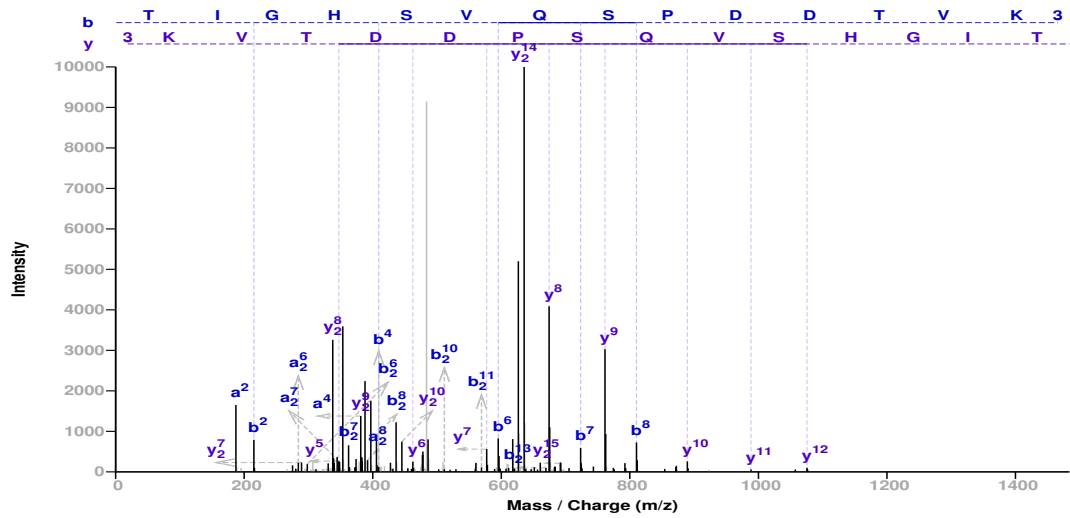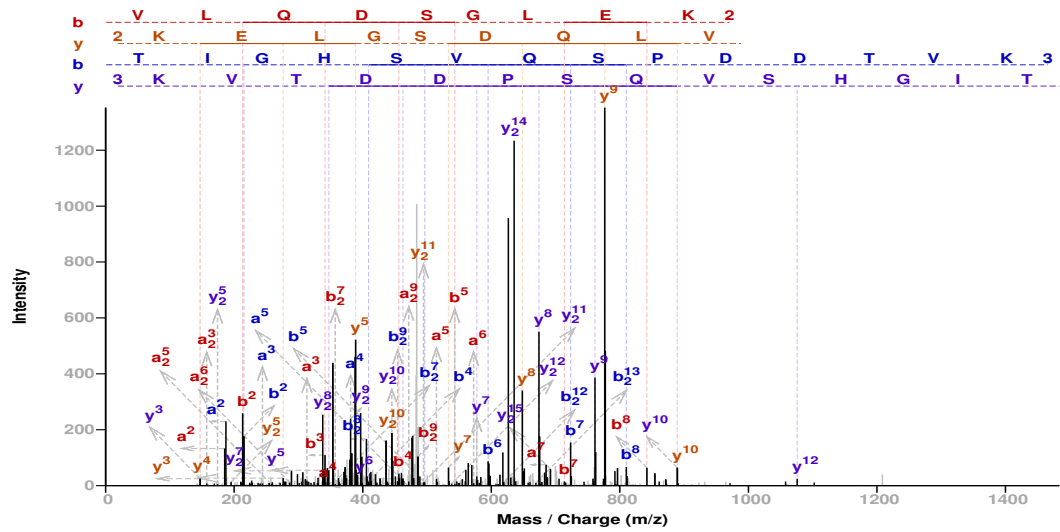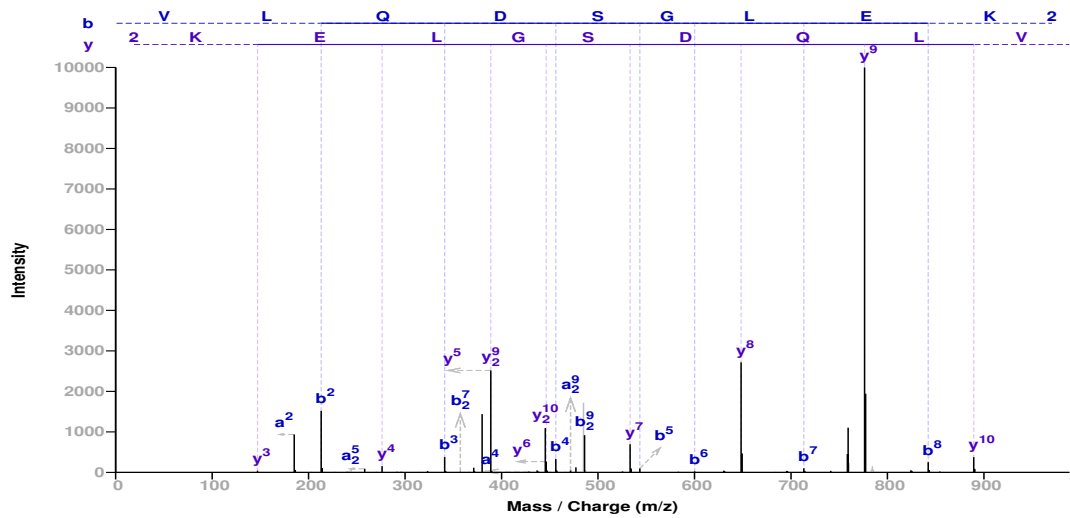

yeast00\_Scan\_Number\_1239 Precursor m/z: 405.746 cosine: 0.800  $\alpha$ : 0.715

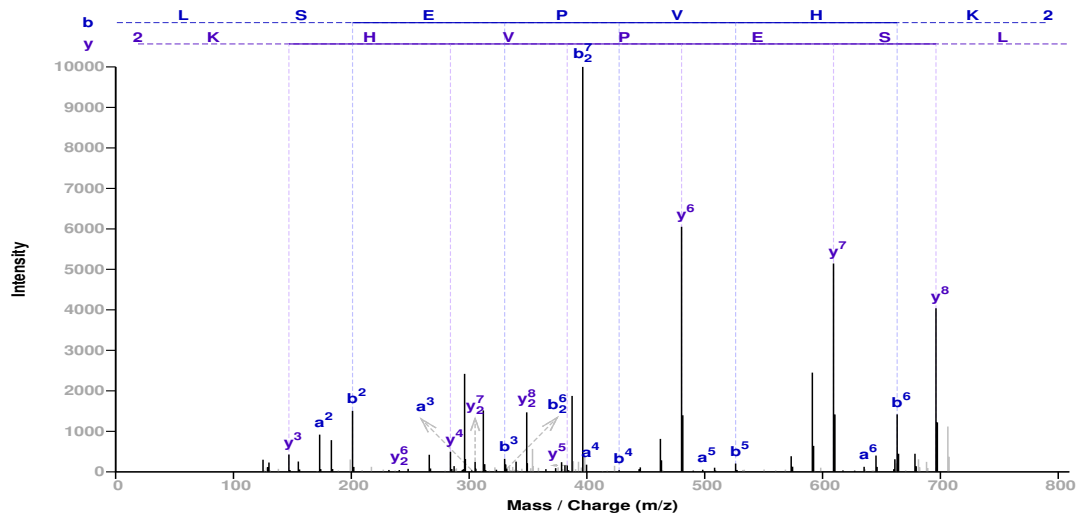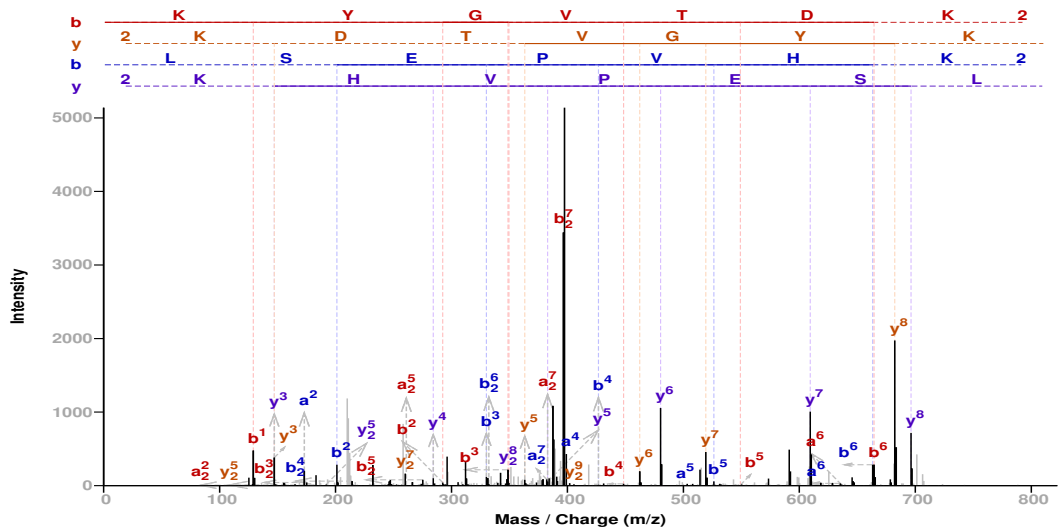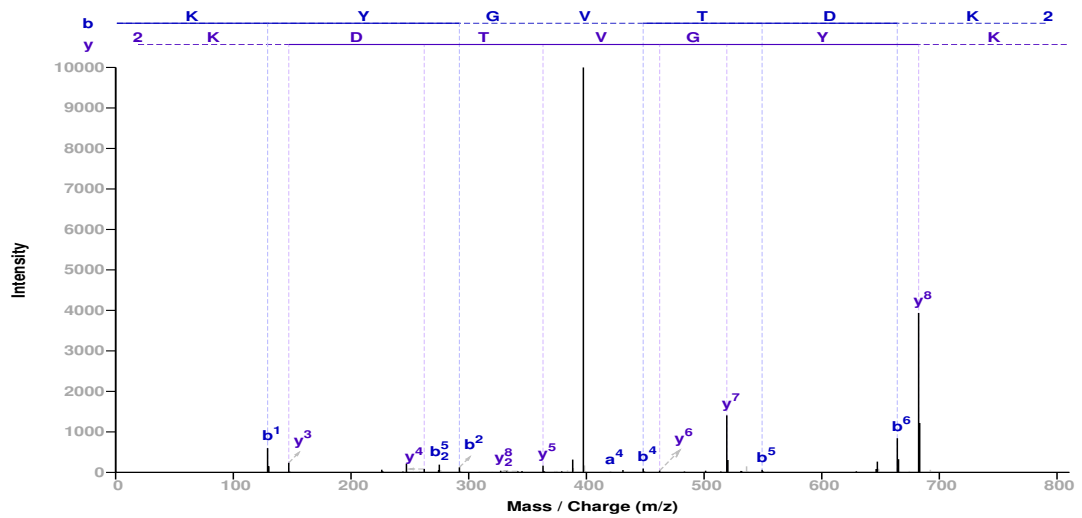

yeast00\_Scan\_Number\_6389 Precursor m/z: 385.558 cosine: 0.831  $\alpha$ : 0.714

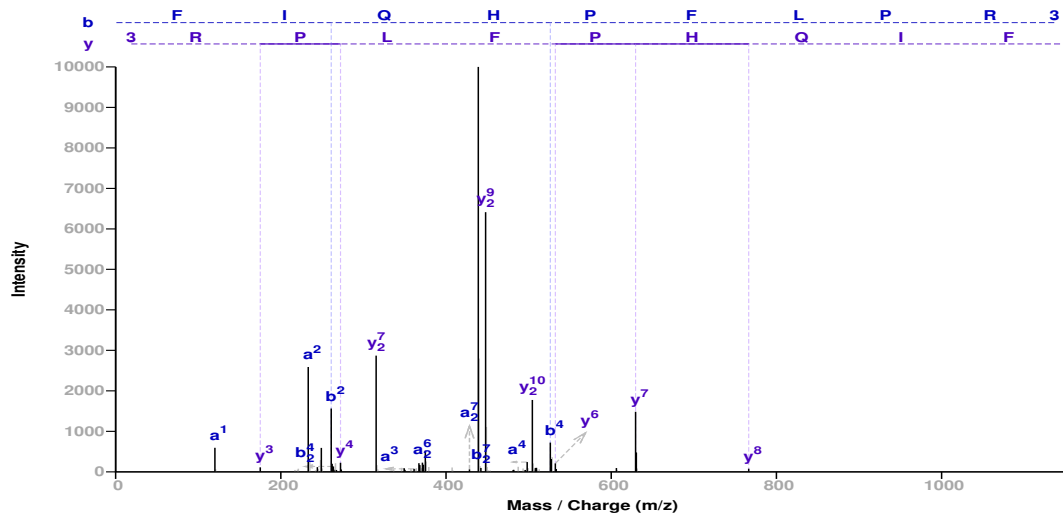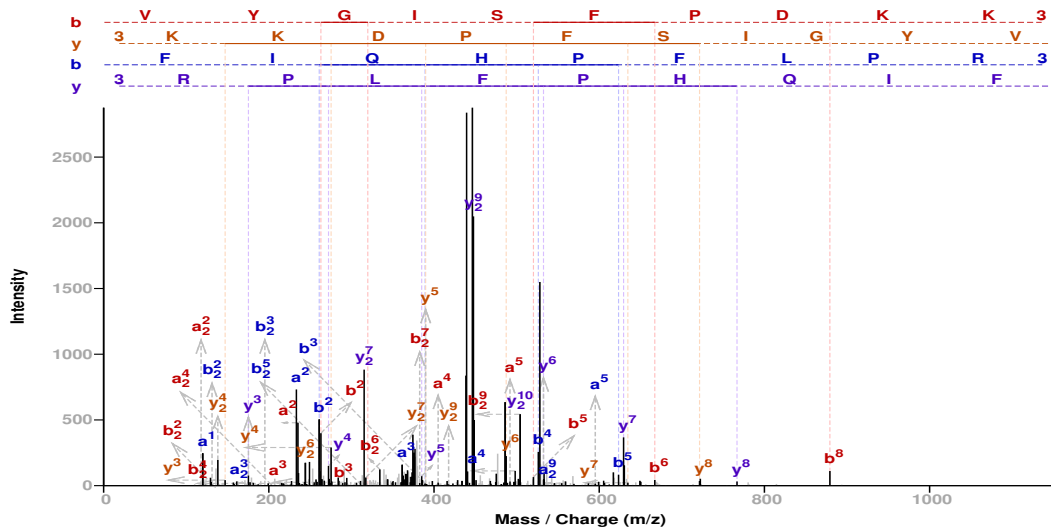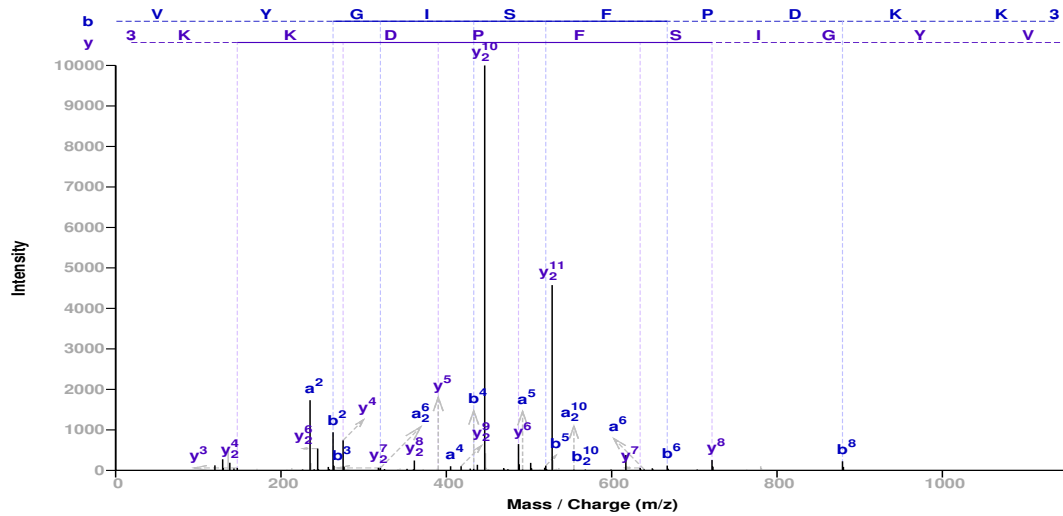



yeast00\_Scan\_Number\_3375 Precursor m/z: 595.312 cosine: 0.745  $\alpha$ : 0.712

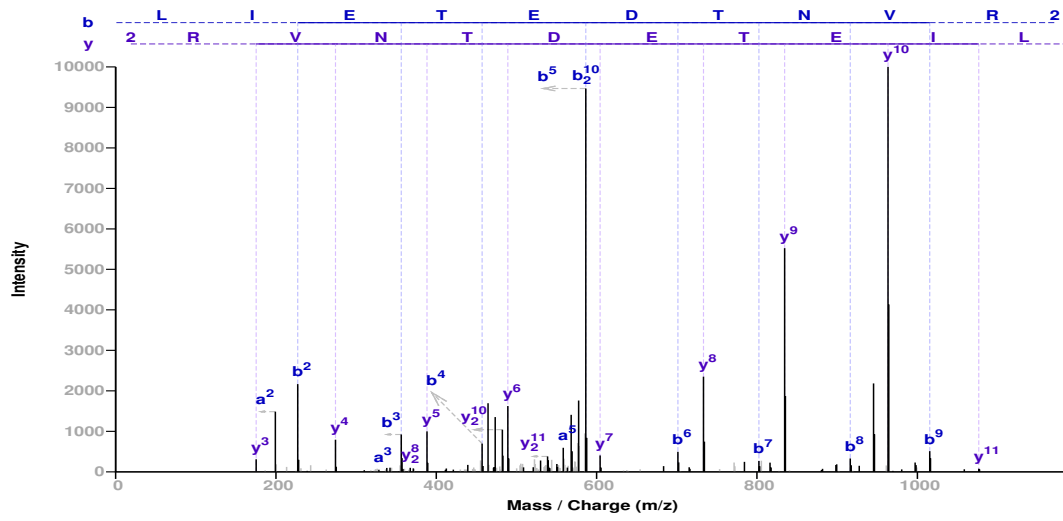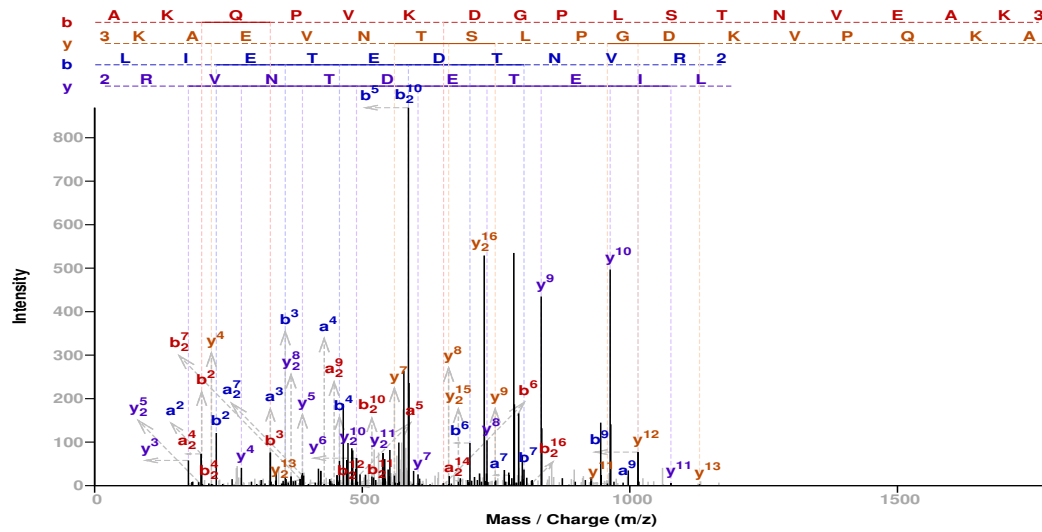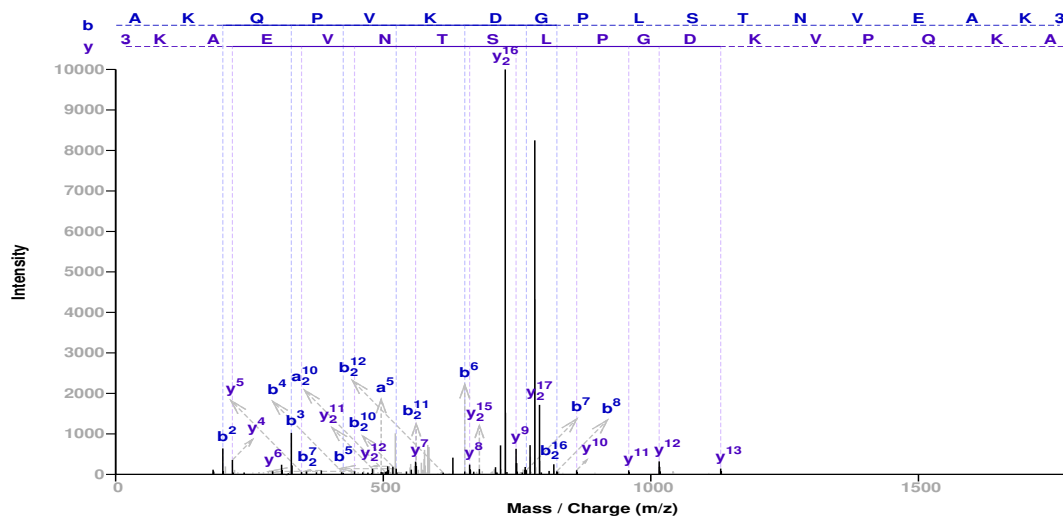



yeast00\_Scan\_Number\_10264 Precursor m/z: 688.369 cosine: 0.726  $\alpha$ : 0.694

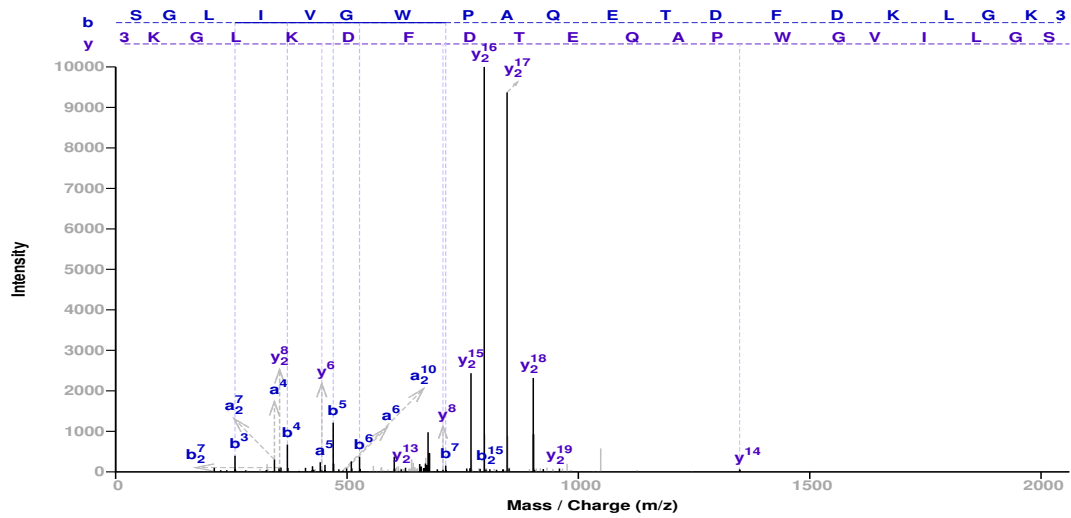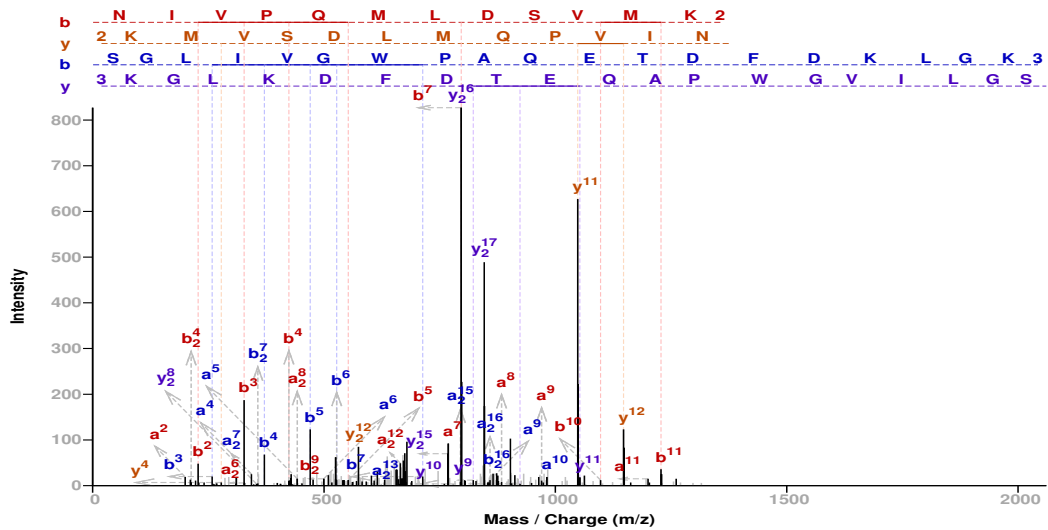

yeast00\_Scan\_Number\_3113 Precursor m/z: 454.750 cosine: 0.723  $\alpha$ : 0.691

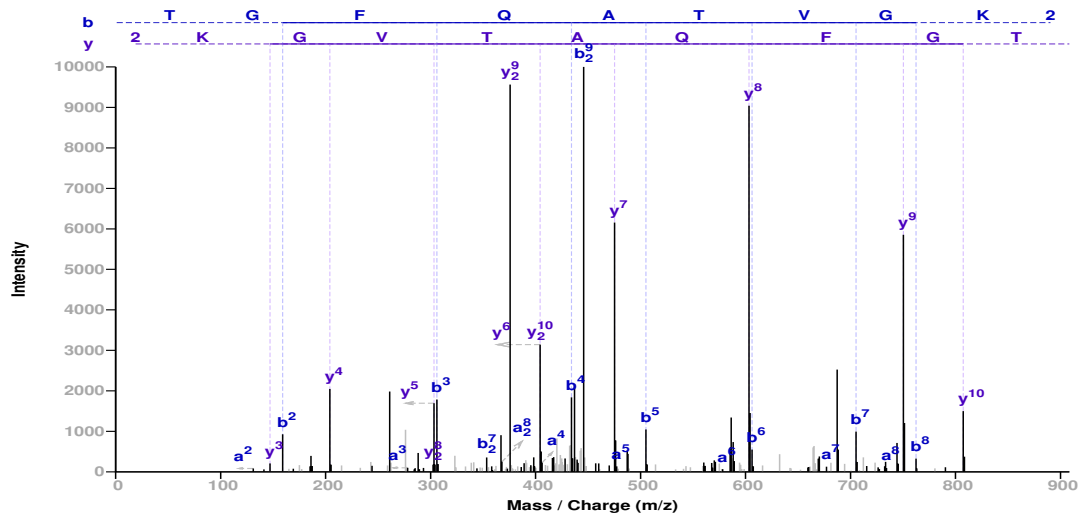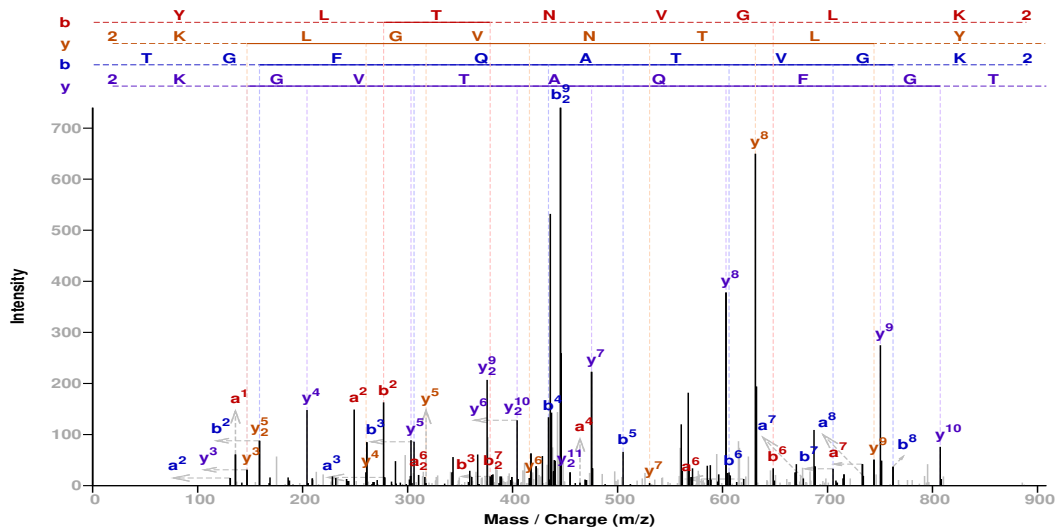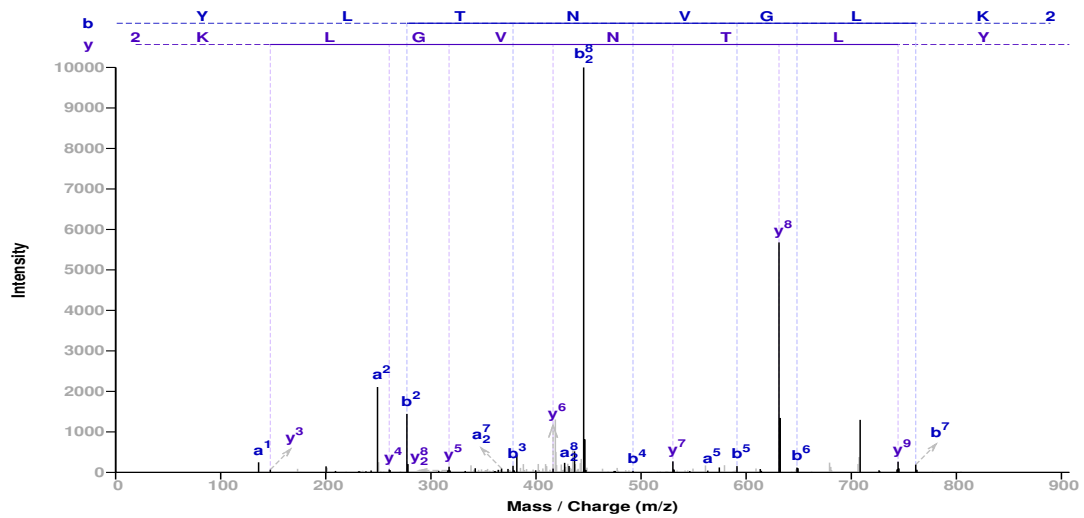

yeast00.Scan\_Number\_2229 Precursor m/z: 556.278 cosine: 0.811  $\alpha$ : 0.678

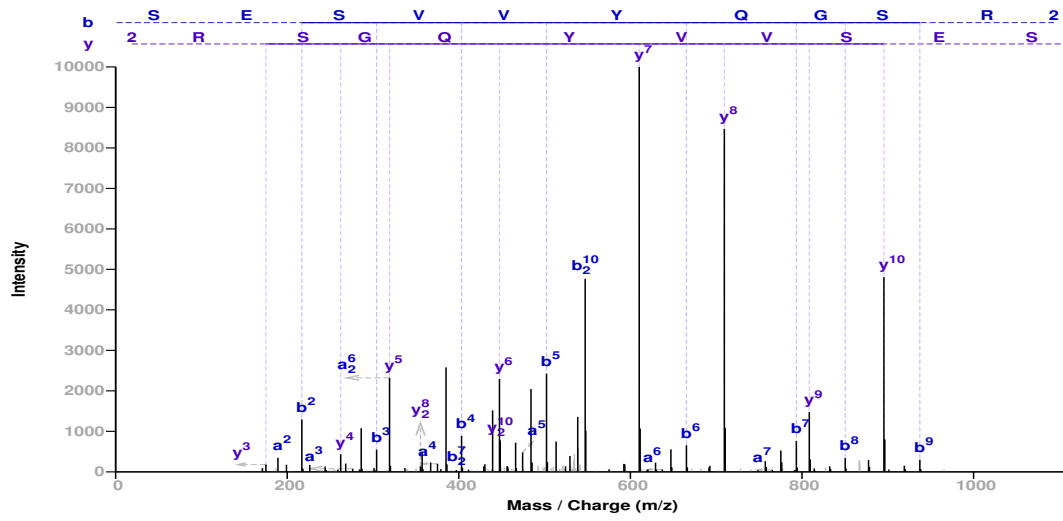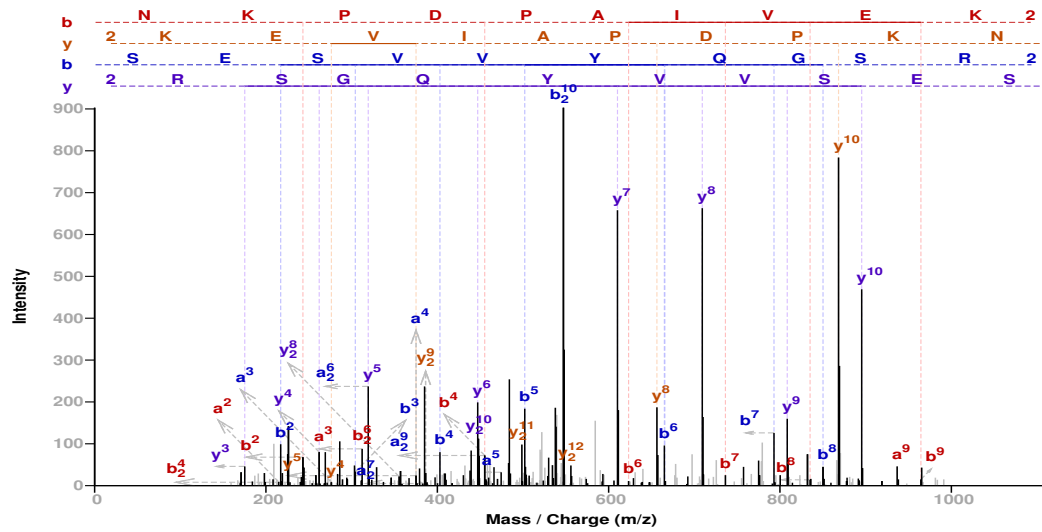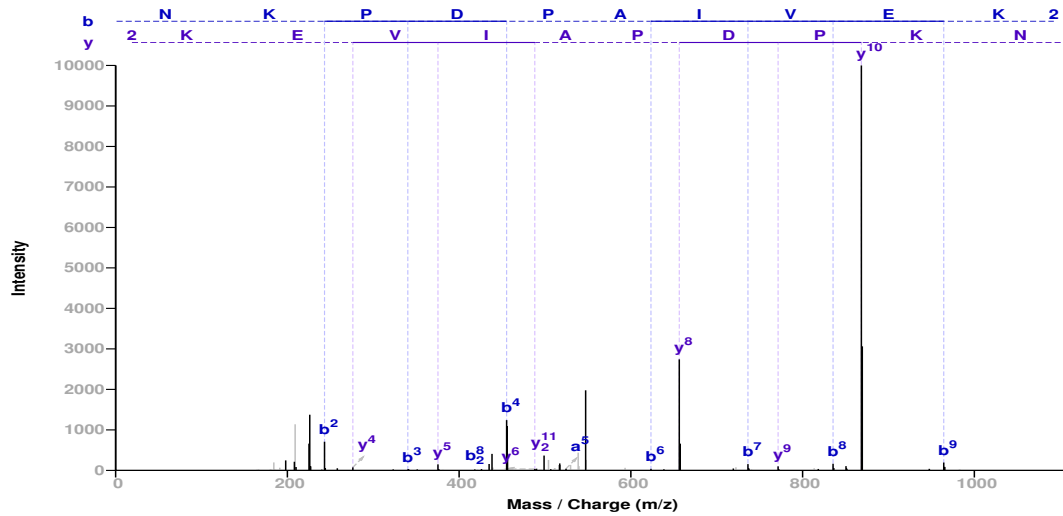



yeast00\_Scan\_Number\_5419 Precursor m/z: 667.335 cosine: 0.873  $\alpha$ : 0.675

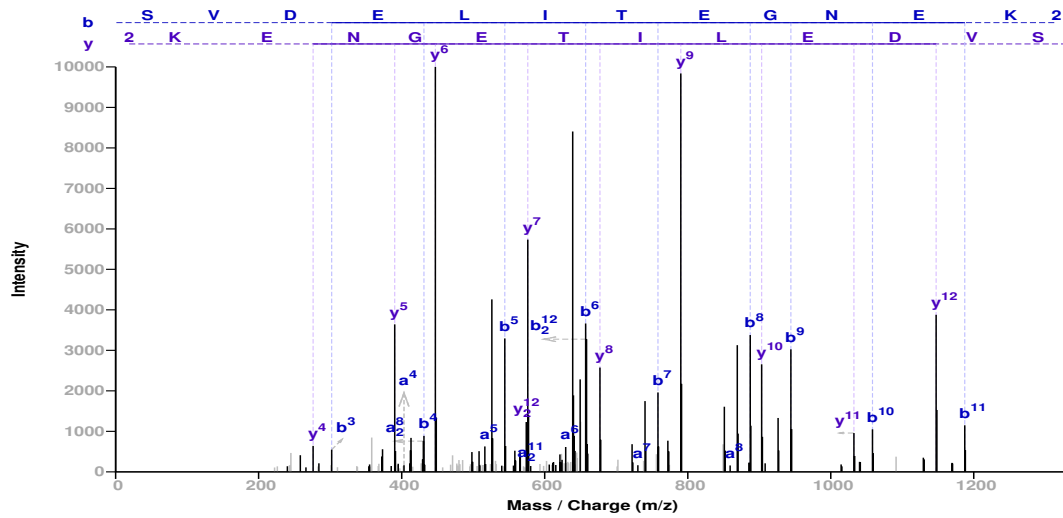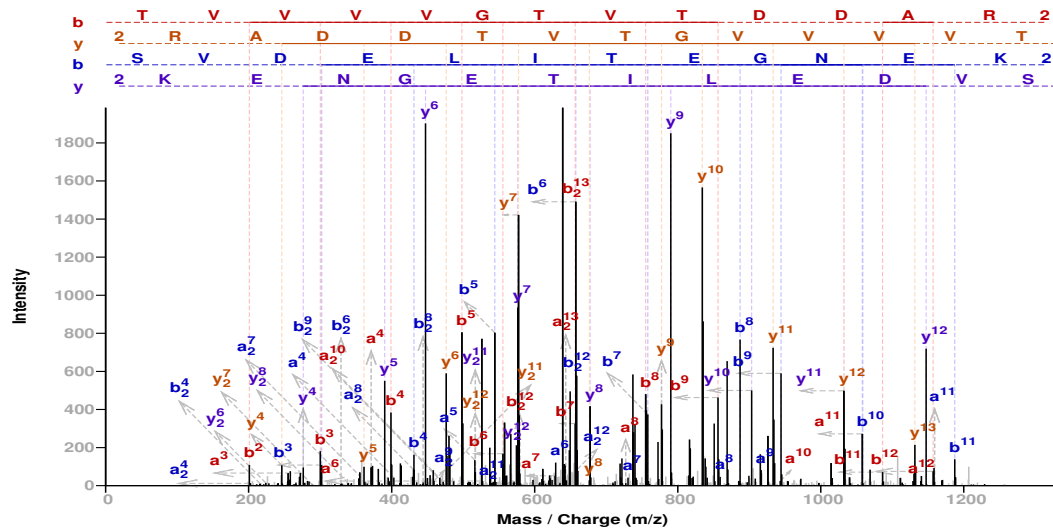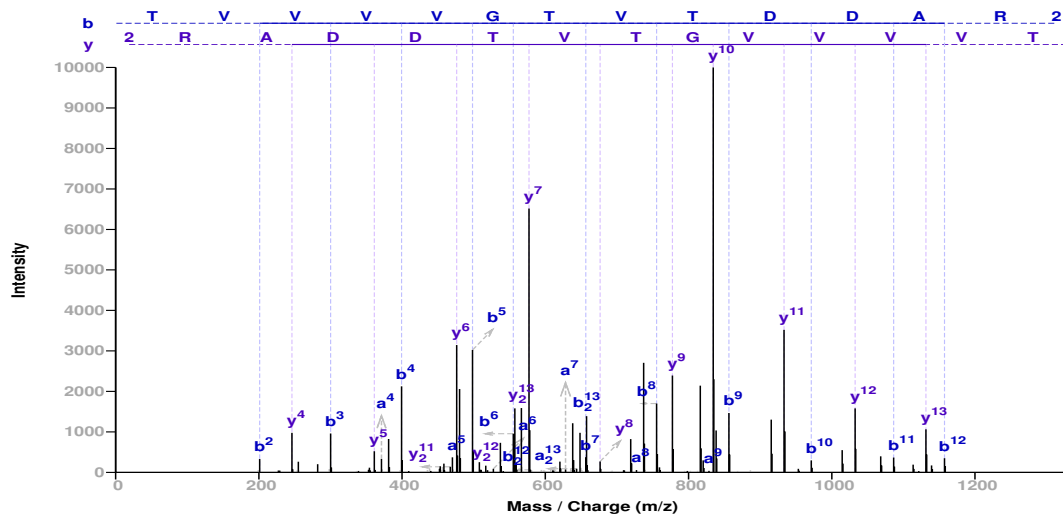

yeast00\_Scan\_Number\_7066 Precursor m/z: 655.681 cosine: 0.725  $\alpha$ : 0.670

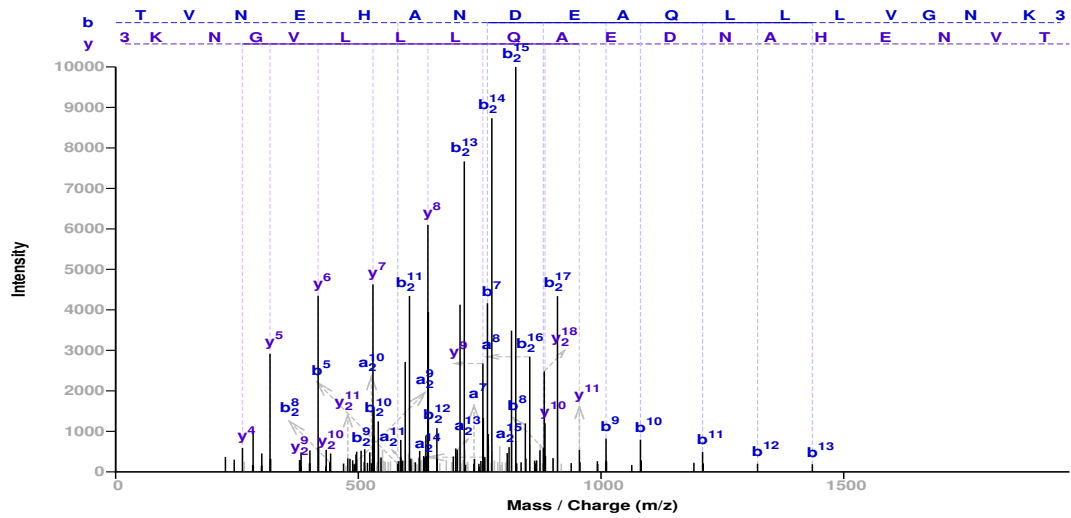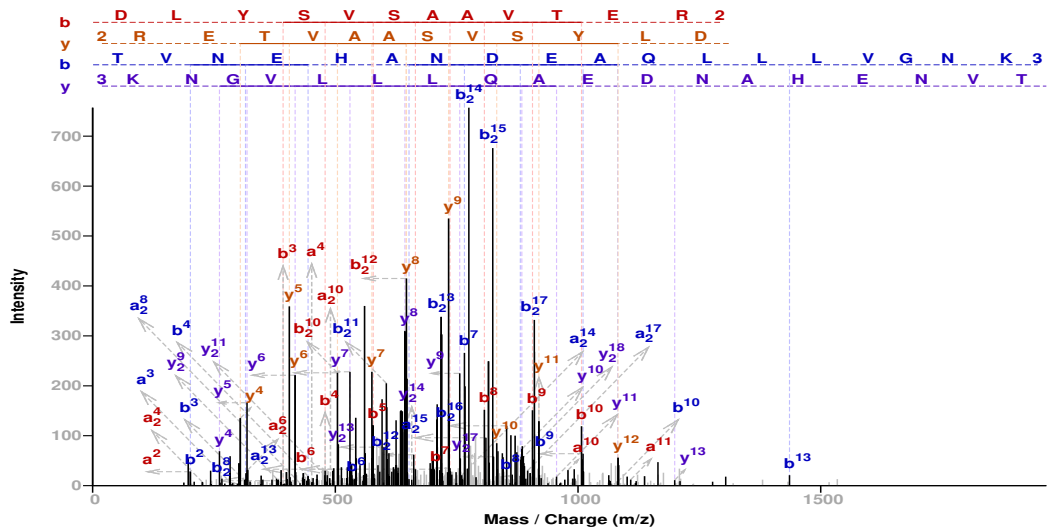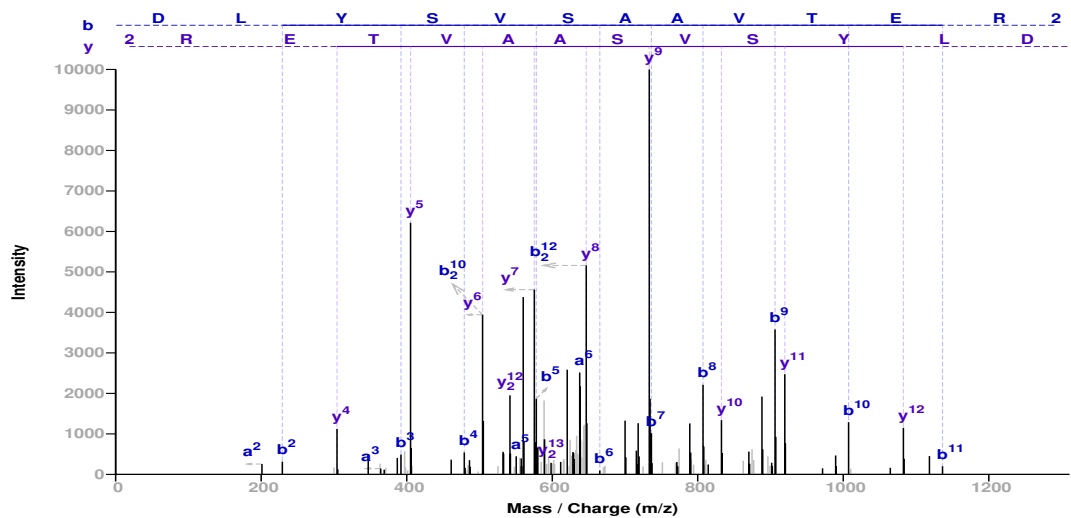



yeast00.Scan\_Number\_5238 Precursor m/z: 611.972 cosine: 0.724  $\alpha$ : 0.668

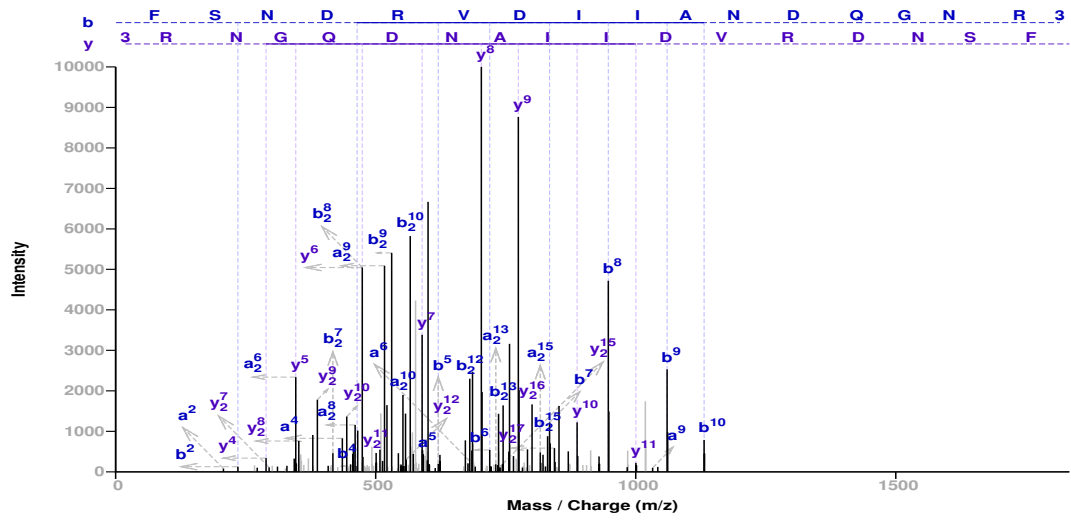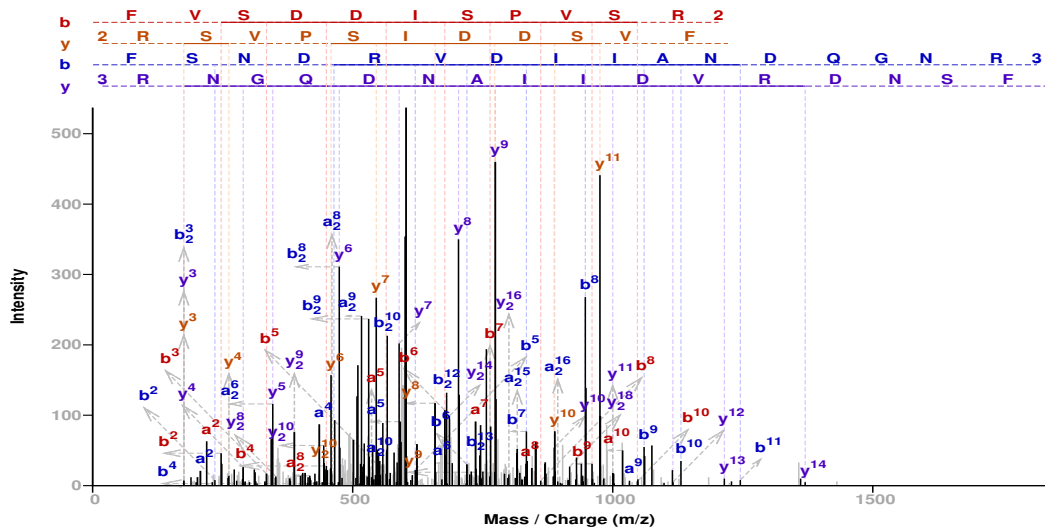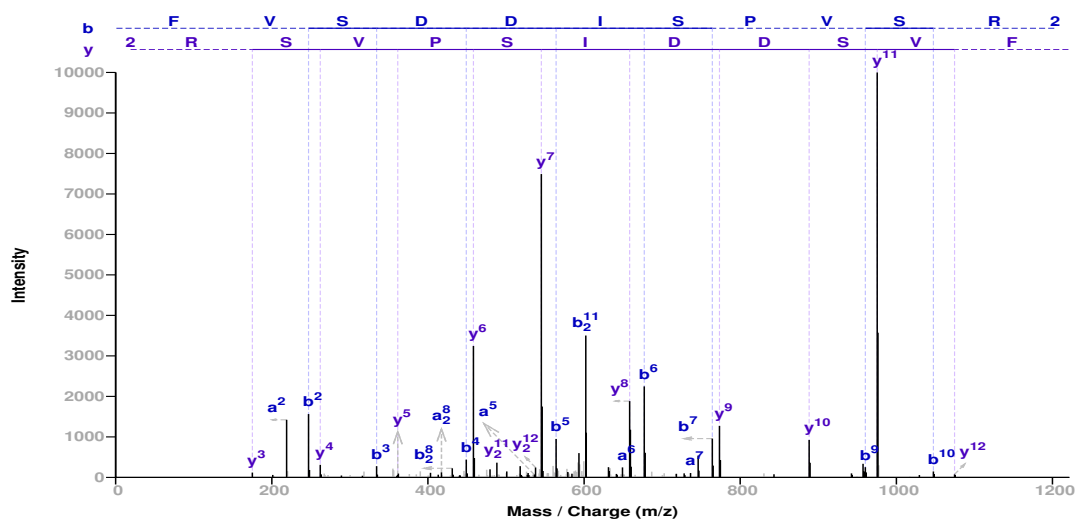

yeast00\_Scan\_Number\_8905 Precursor m/z: 683.401 cosine: 0.716  $\alpha$ : 0.667

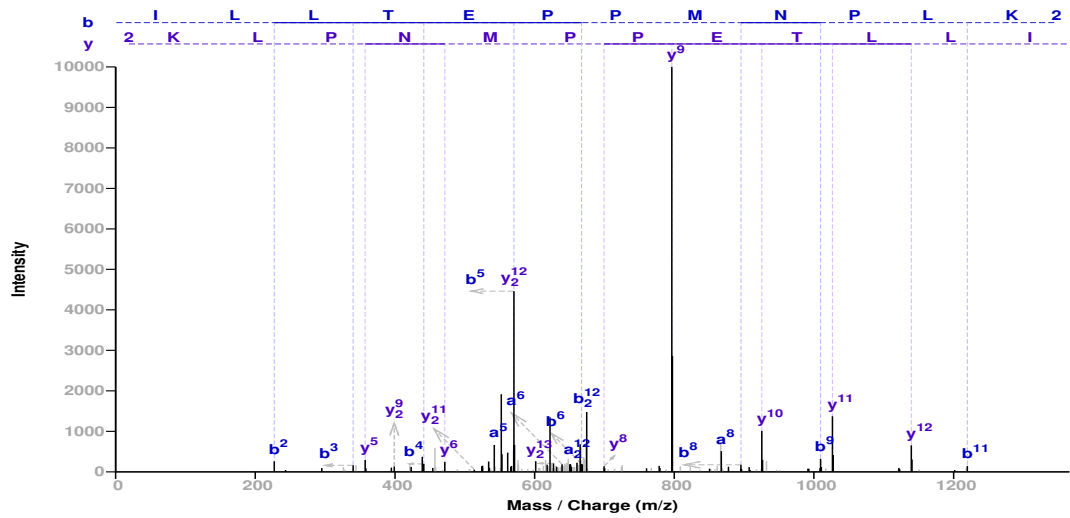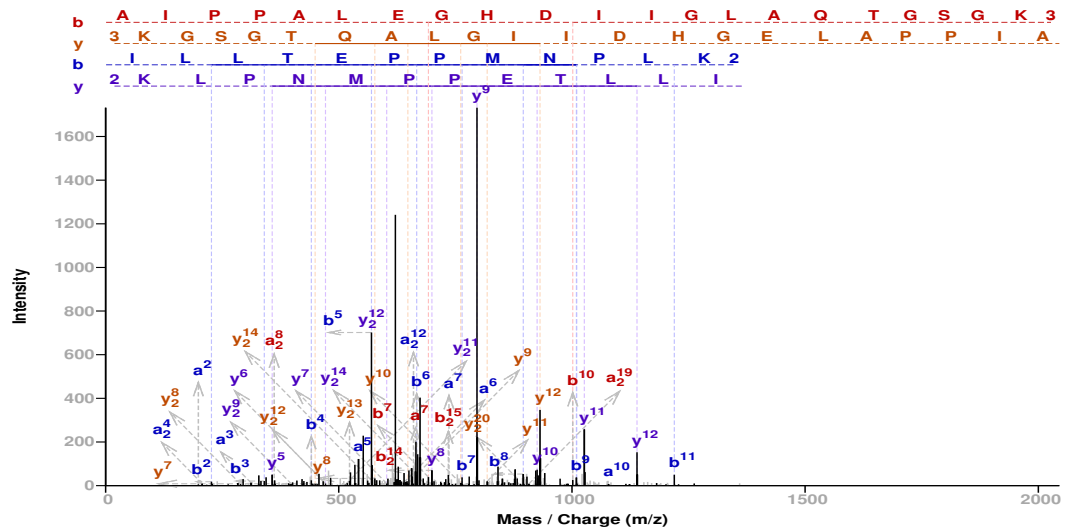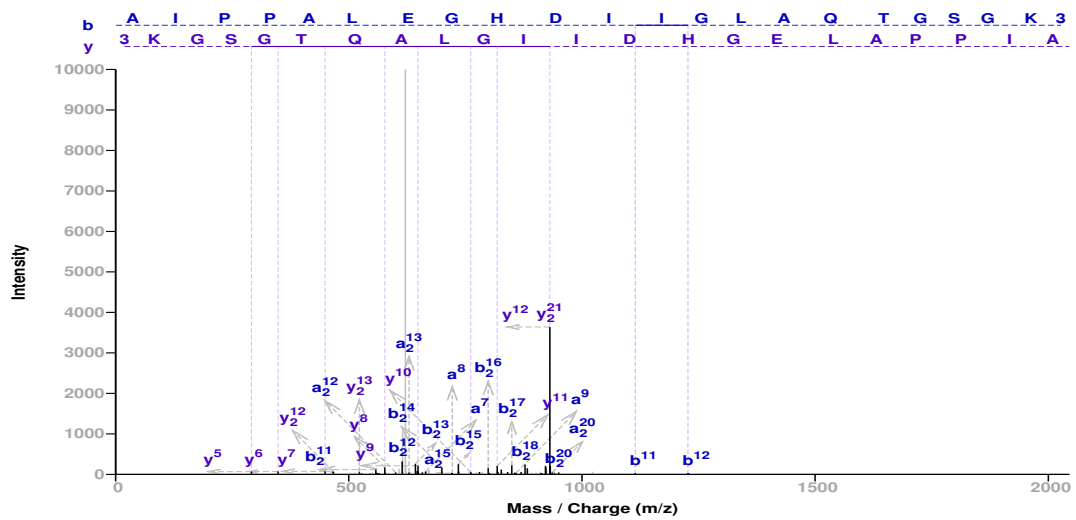

yeast00\_Scan\_Number\_2648 Precursor m/z: 536.809 cosine: 0.768  $\alpha$ : 0.661

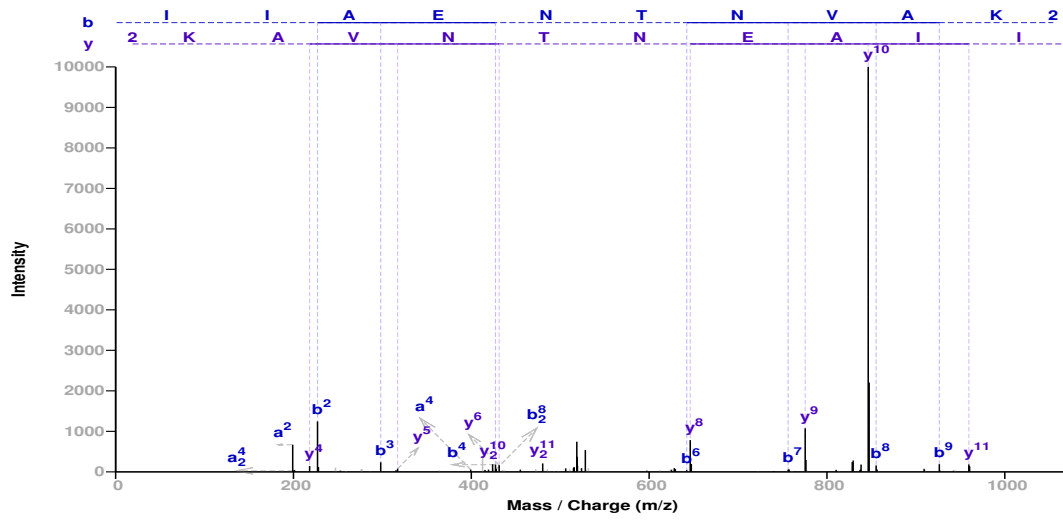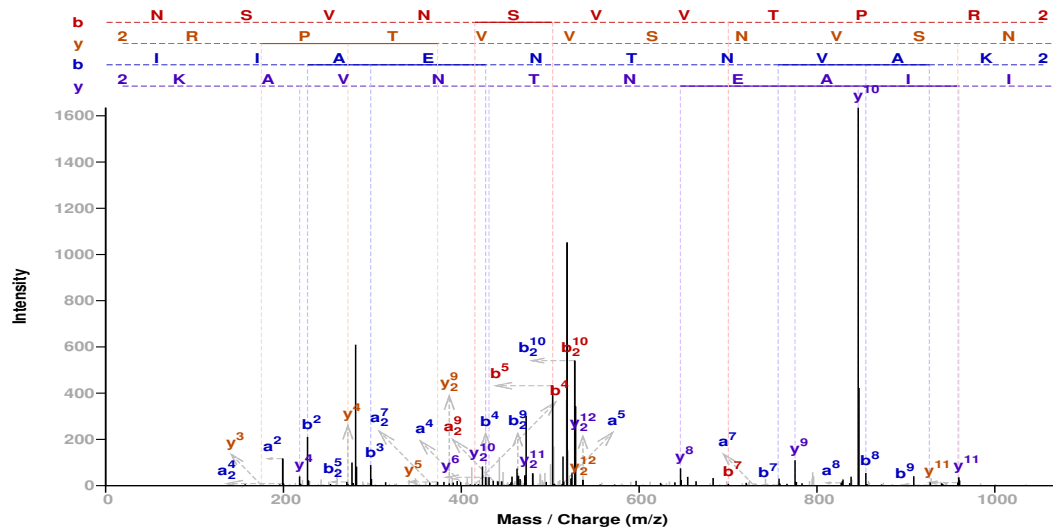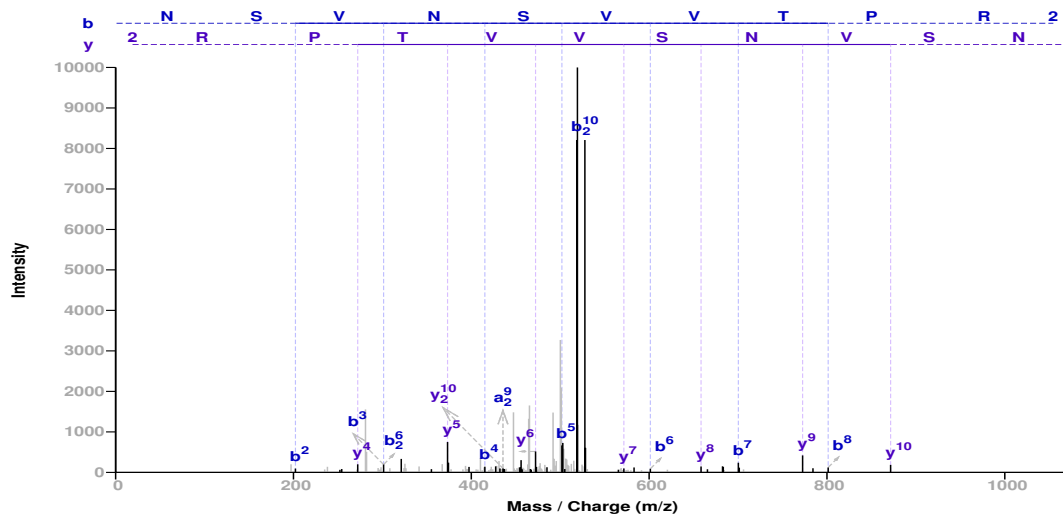

yeast00\_Scan\_Number\_2035 Precursor m/z: 387.697 cosine: 0.794  $\alpha$ : 0.659

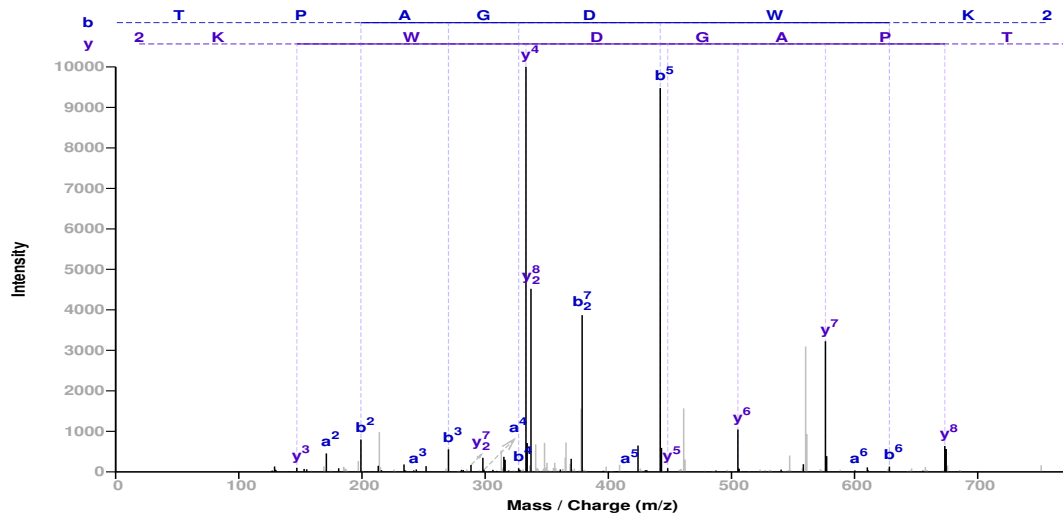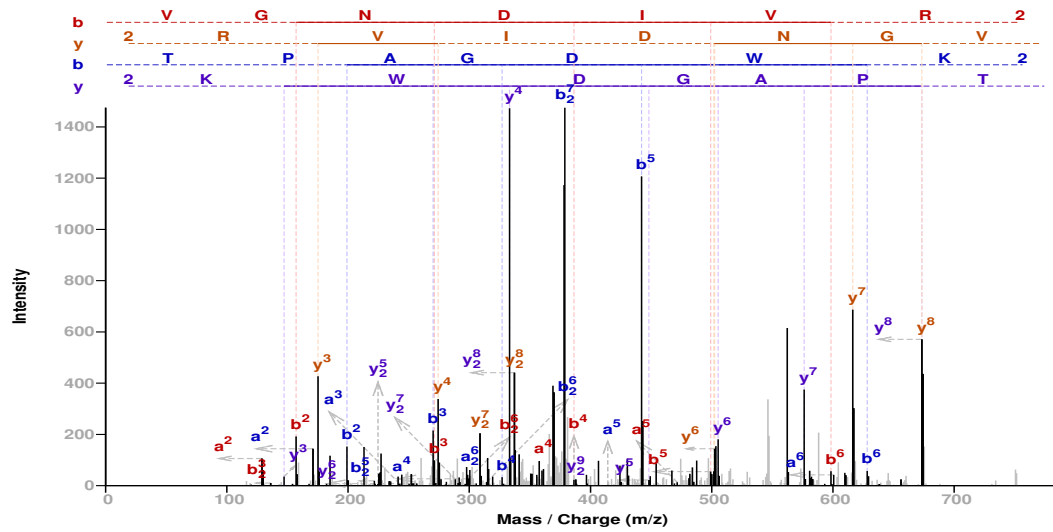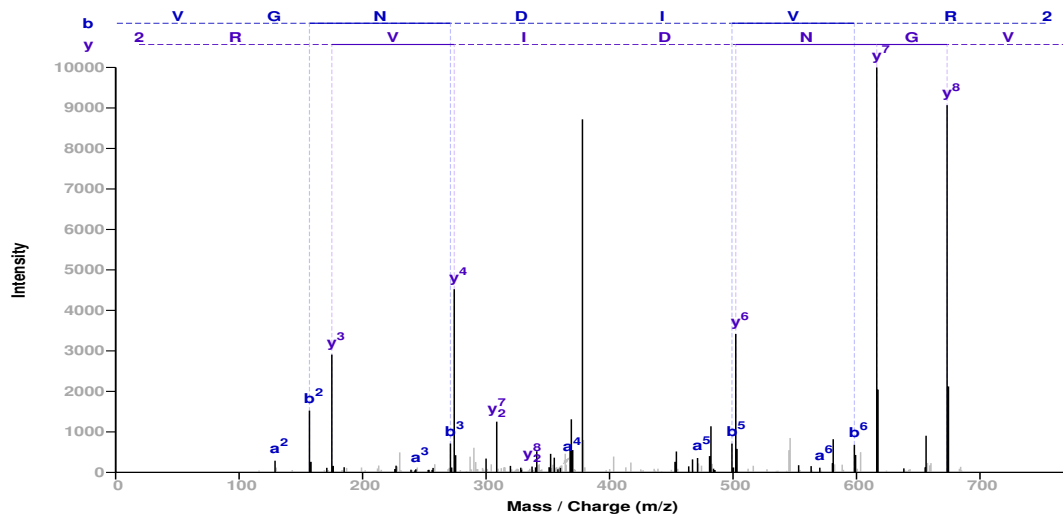

yeast00\_Scan\_Number\_2143 Precursor m/z: 520.756 cosine: 0.759  $\alpha$ : 0.644

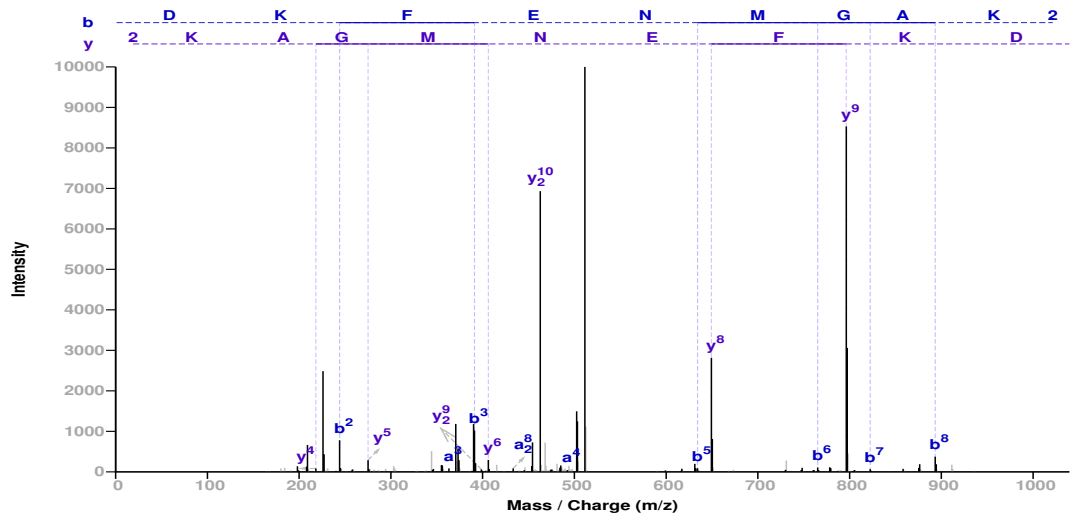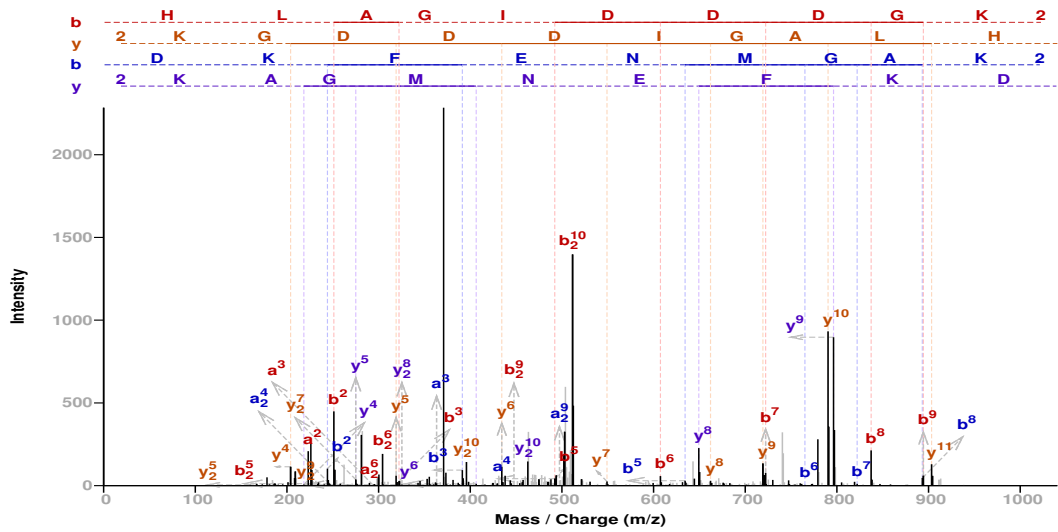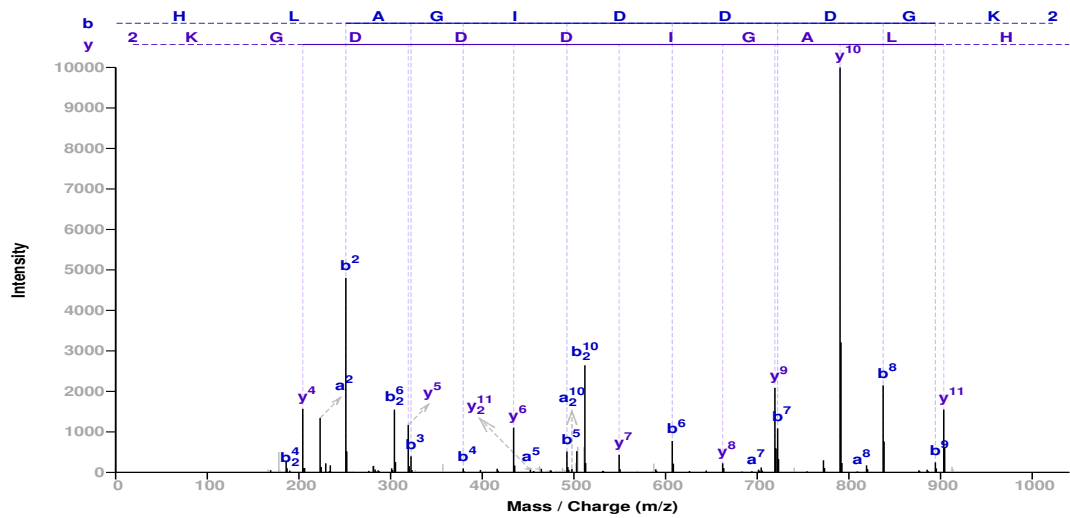



yeast00\_Scan\_Number\_6970 Precursor m/z: 404.235 cosine: 0.733  $\alpha$ : 0.643

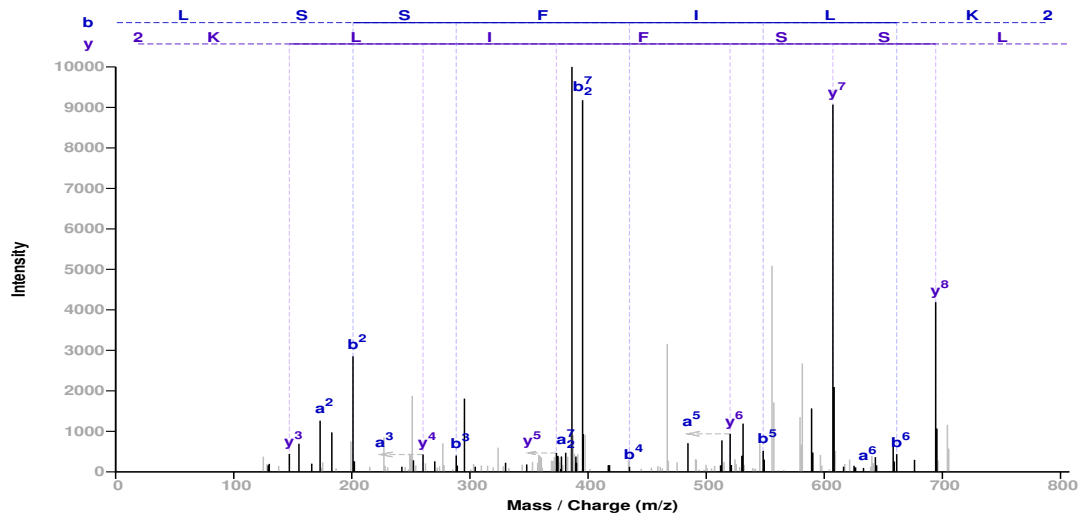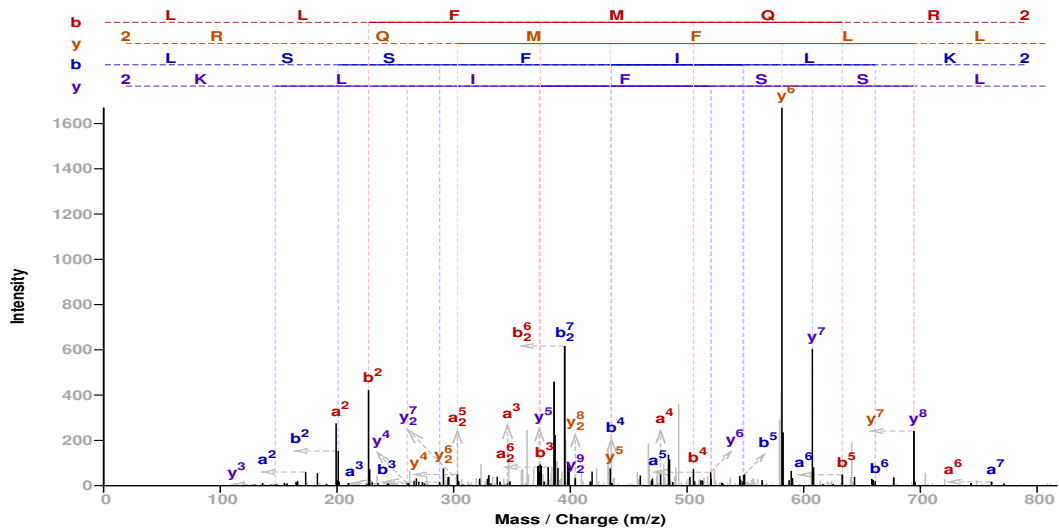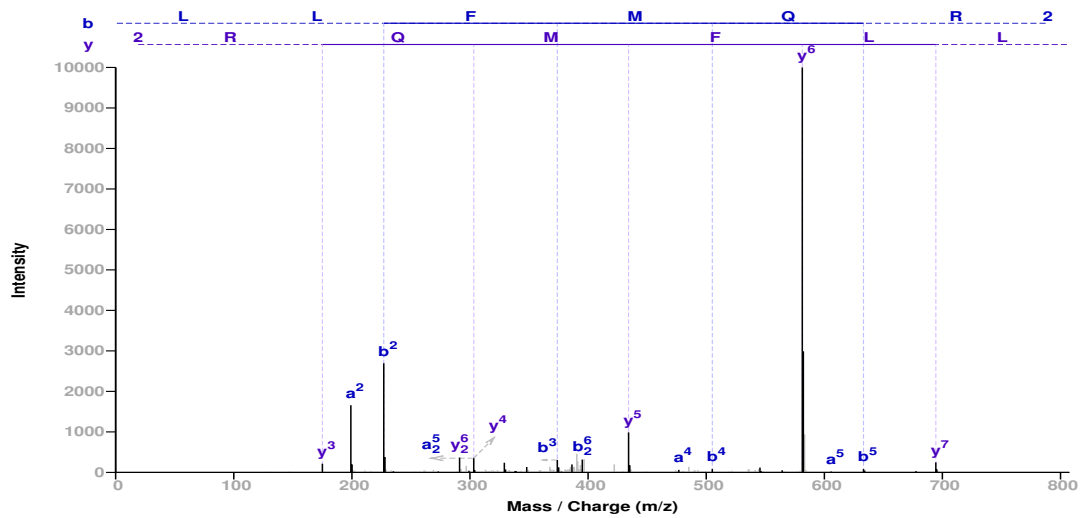

yeast00\_Scan\_Number\_1496 Precursor m/z: 445.242 cosine: 0.889  $\alpha$ : 0.642

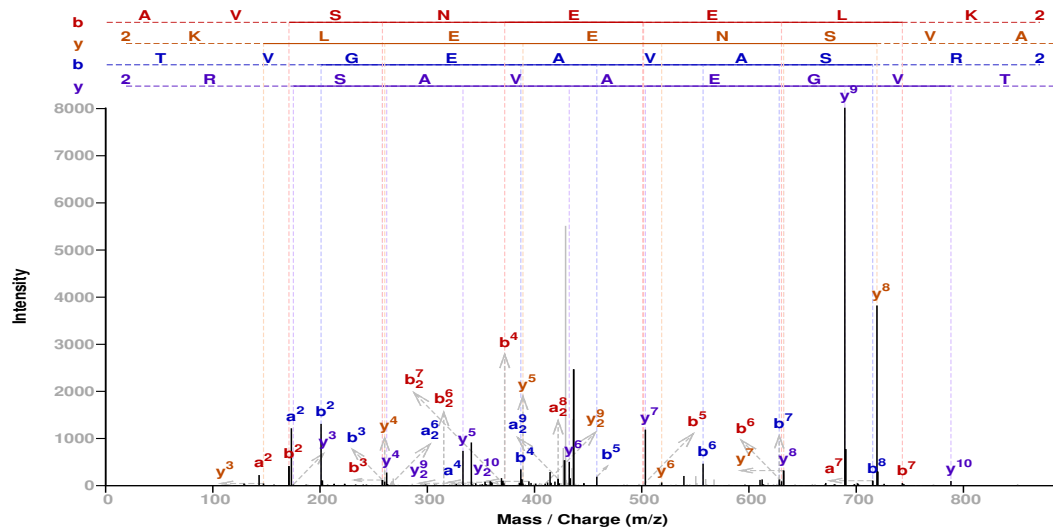



yeast00.Scan\_Number\_2065 Precursor m/z: 480.264 cosine: 0.894  $\alpha$ : 0.635

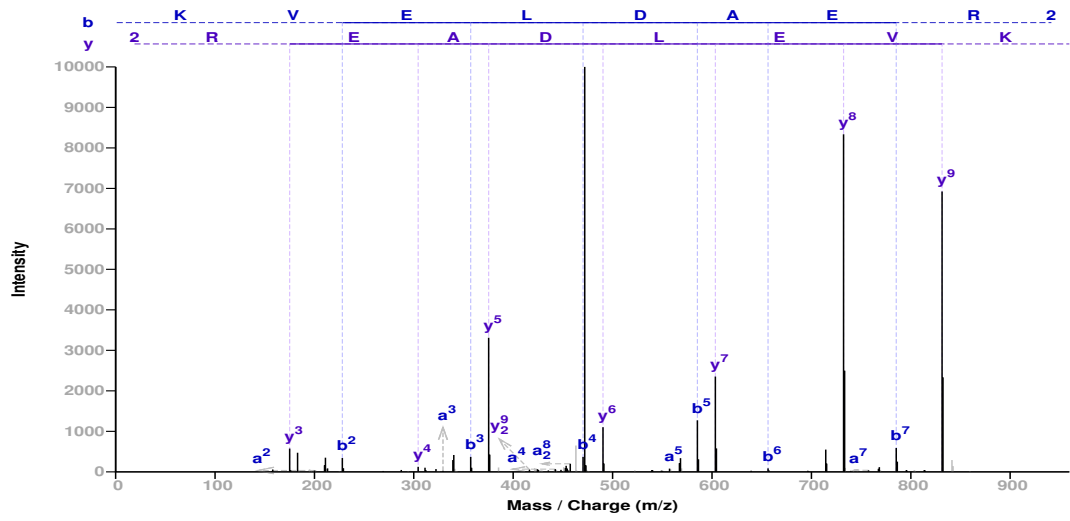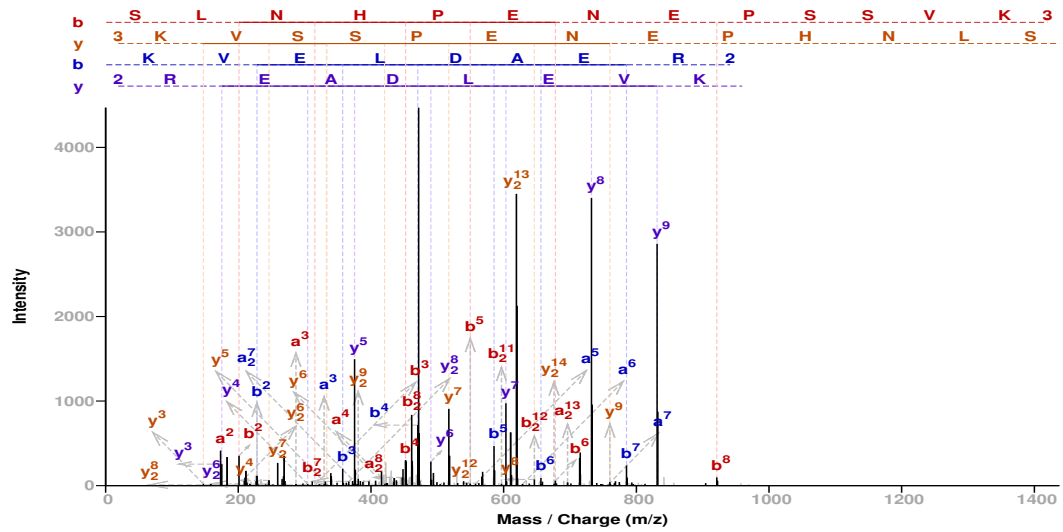

yeast00\_Scan\_Number\_1092 Precursor m/z: 474.723 cosine: 0.721  $\alpha$ : 0.633

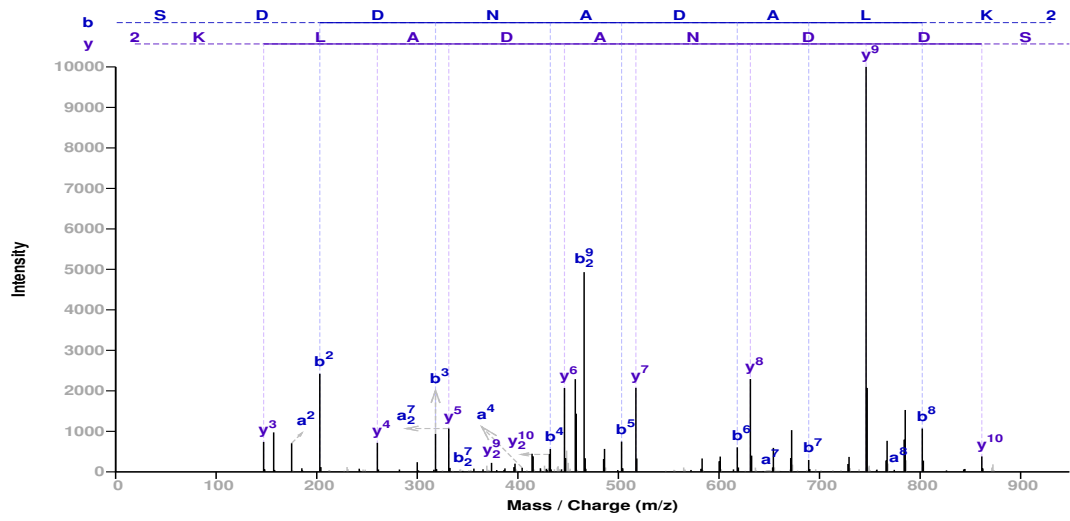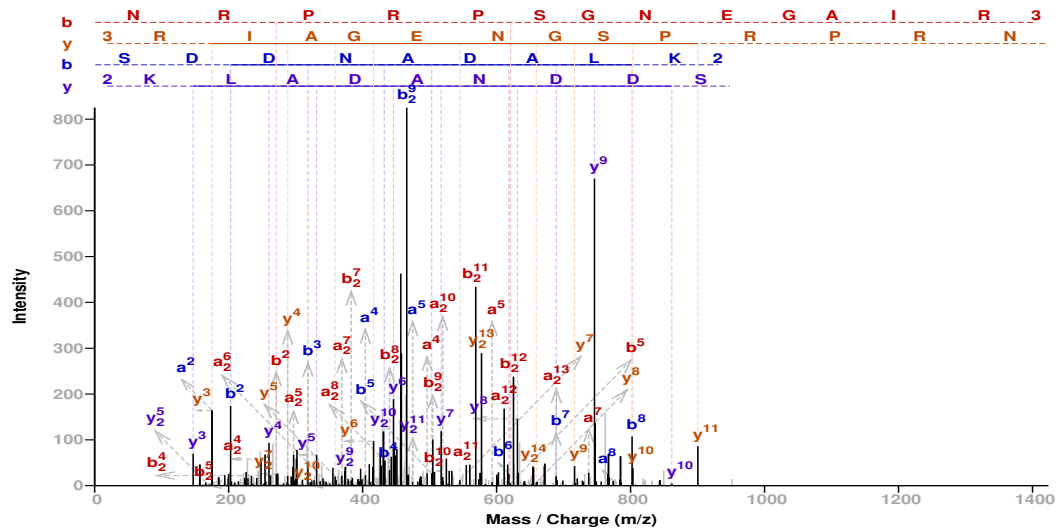

yeast00\_Scan\_Number\_2570 Precursor m/z: 388.223 cosine: 0.855  $\alpha$ : 0.621

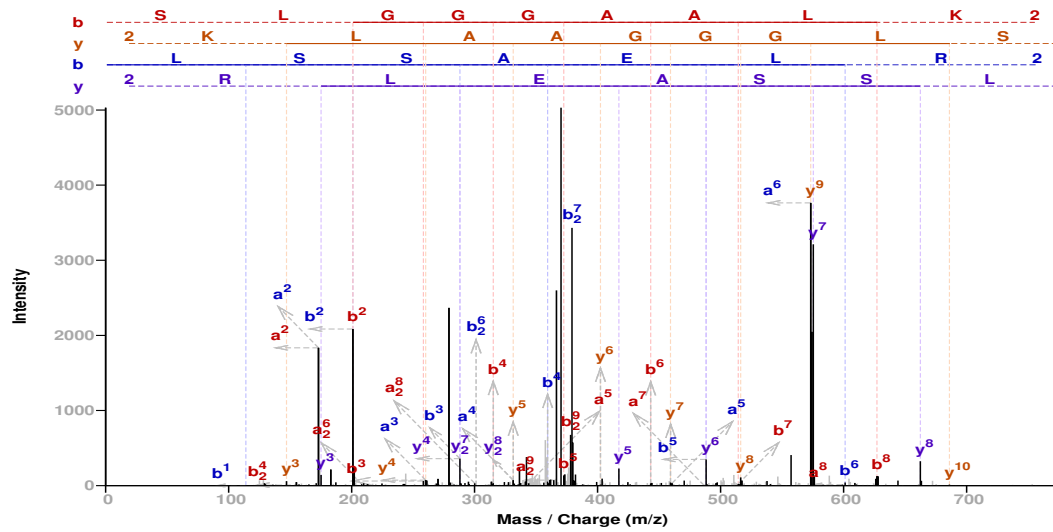



yeast00\_Scan\_Number\_6008 Precursor m/z: 709.884 cosine: 0.859  $\alpha$ : 0.609

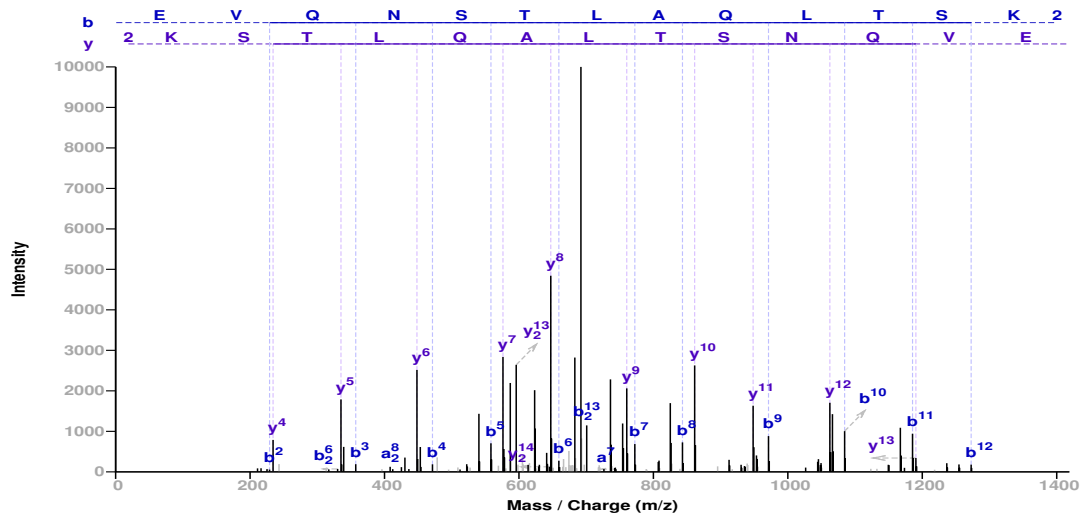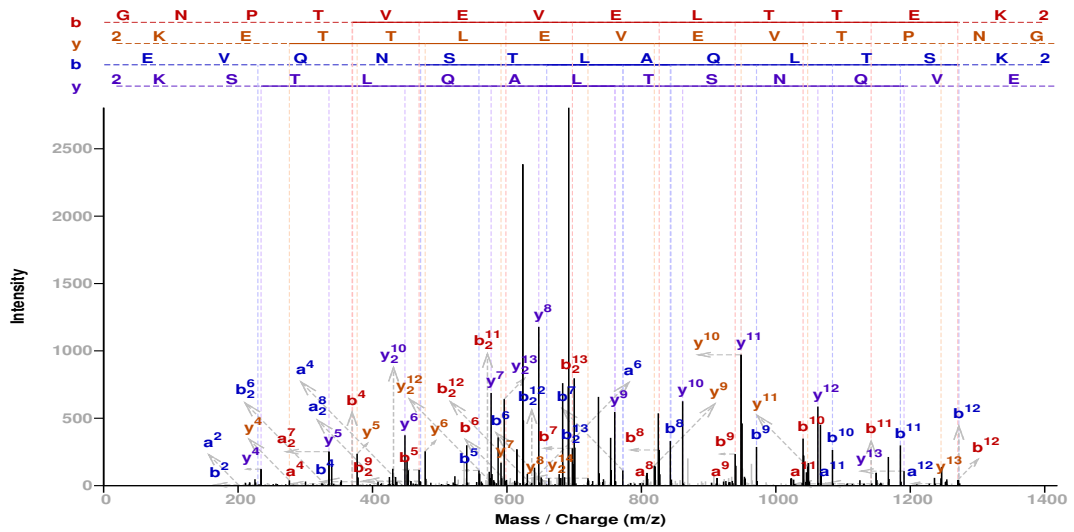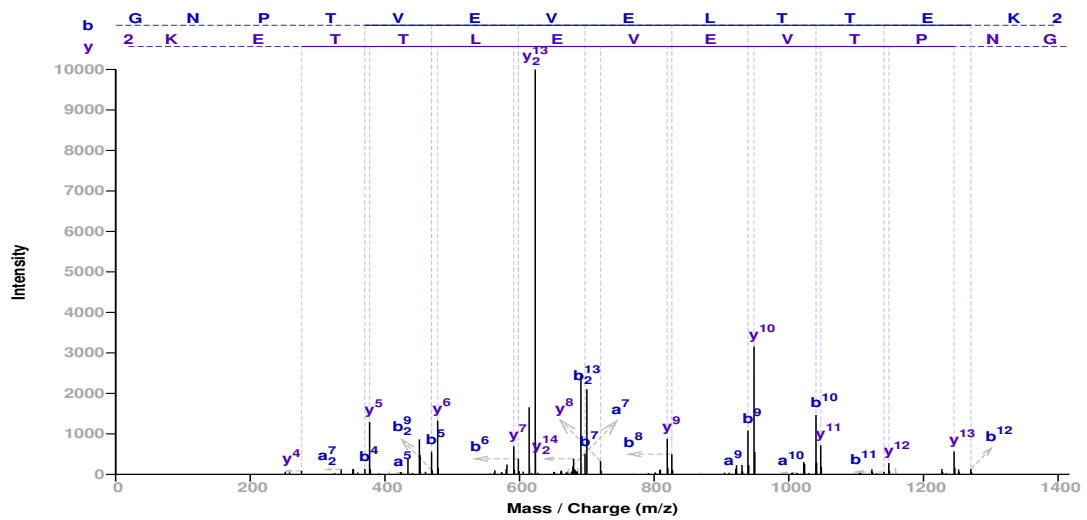

yeast00\_Scan\_Number\_816 Precursor m/z: 496.724 cosine: 0.761  $\alpha$ : 0.605

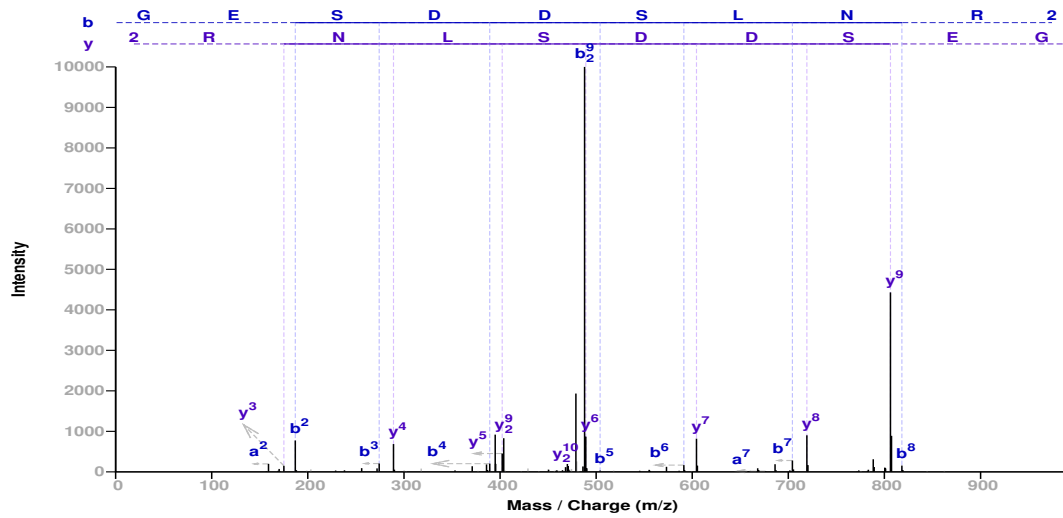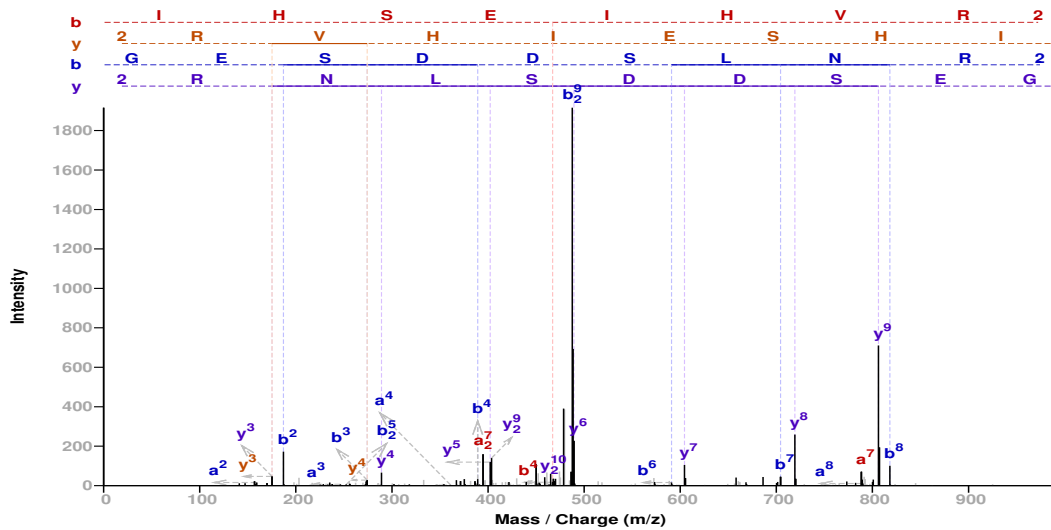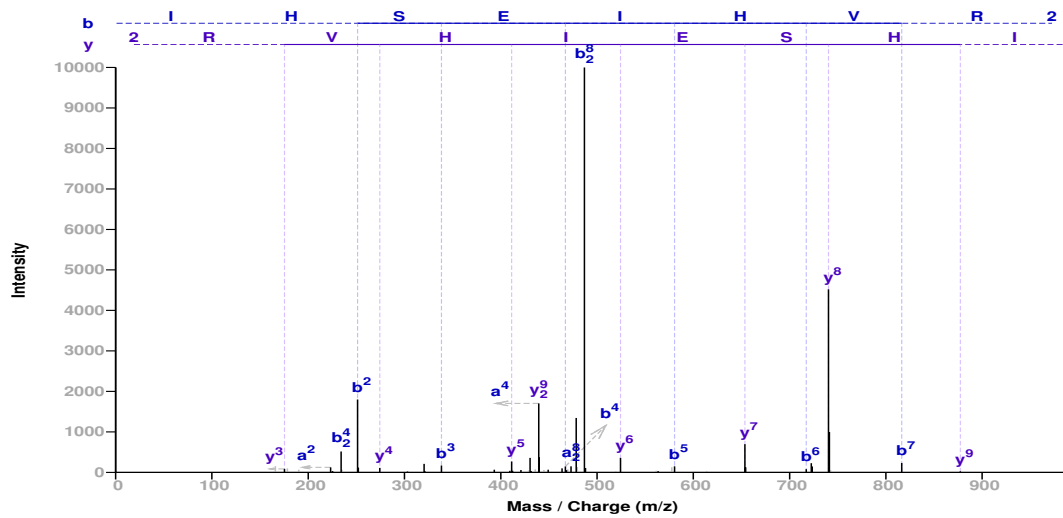

yeast00\_Scan\_Number\_8717 Precursor m/z: 616.357 cosine: 0.838  $\alpha$ : 0.605

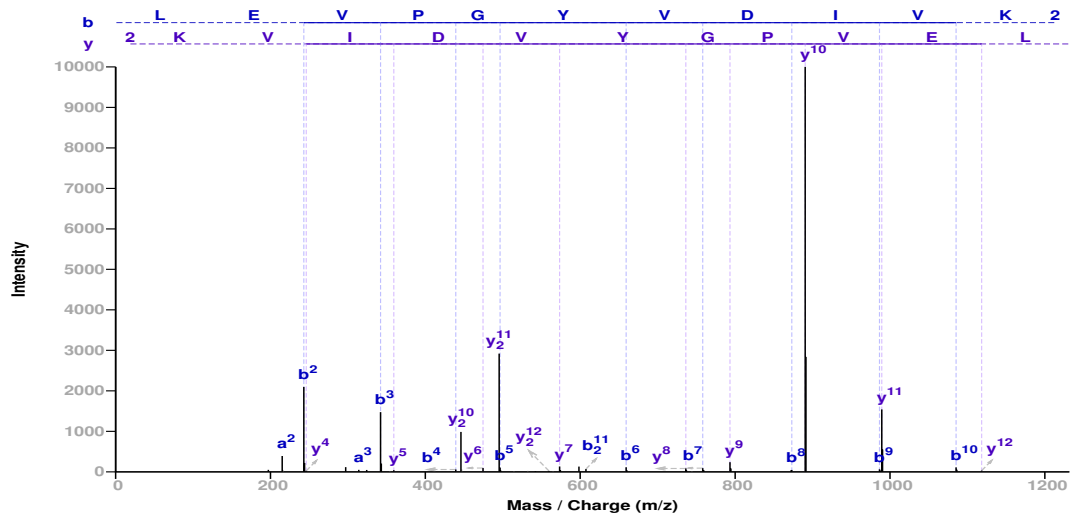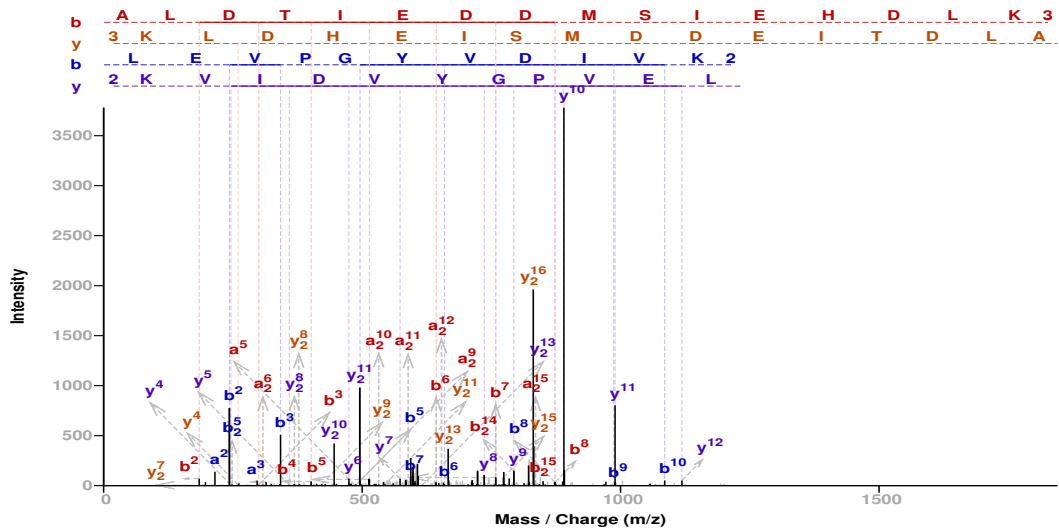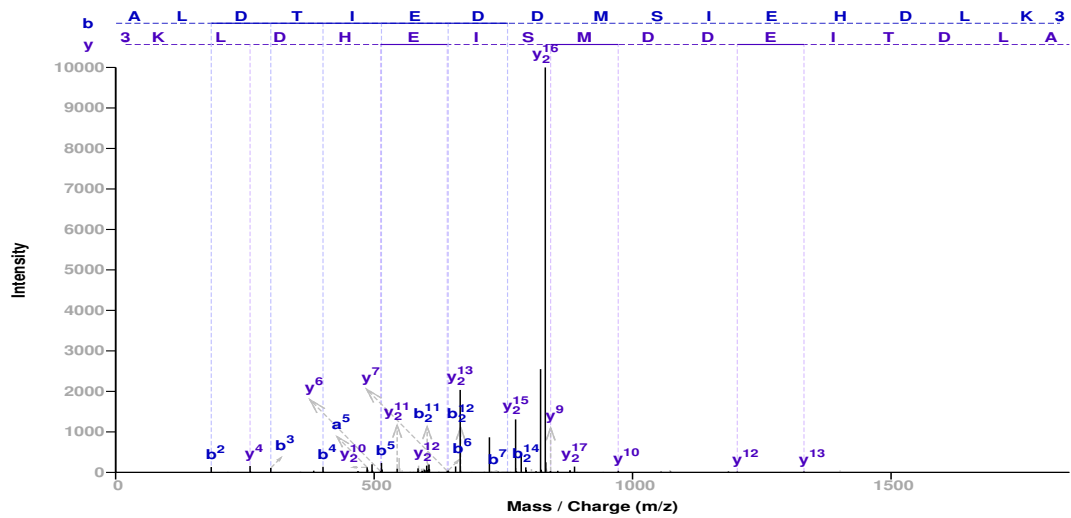

yeast00\_Scan\_Number\_6146 Precursor m/z: 533.777 cosine: 0.905  $\alpha$ : 0.604

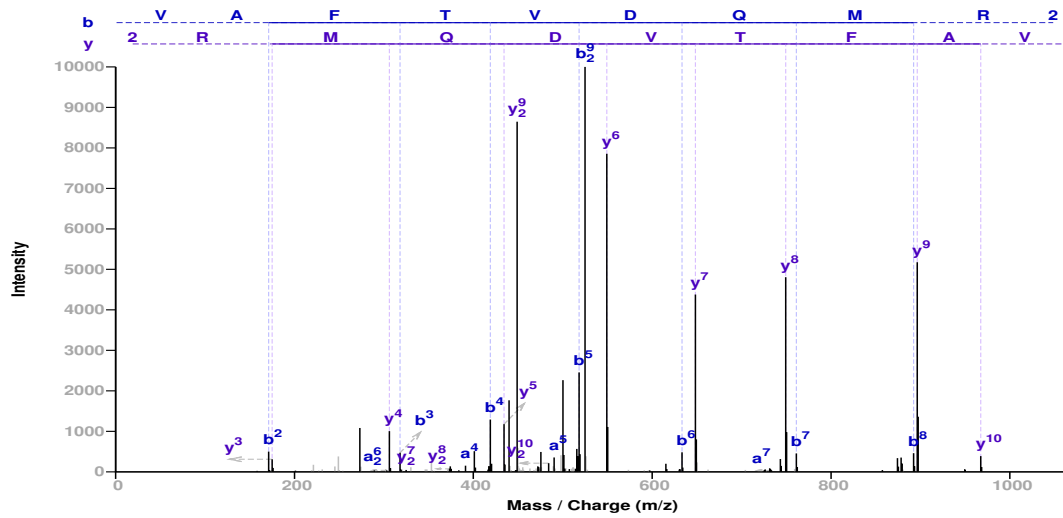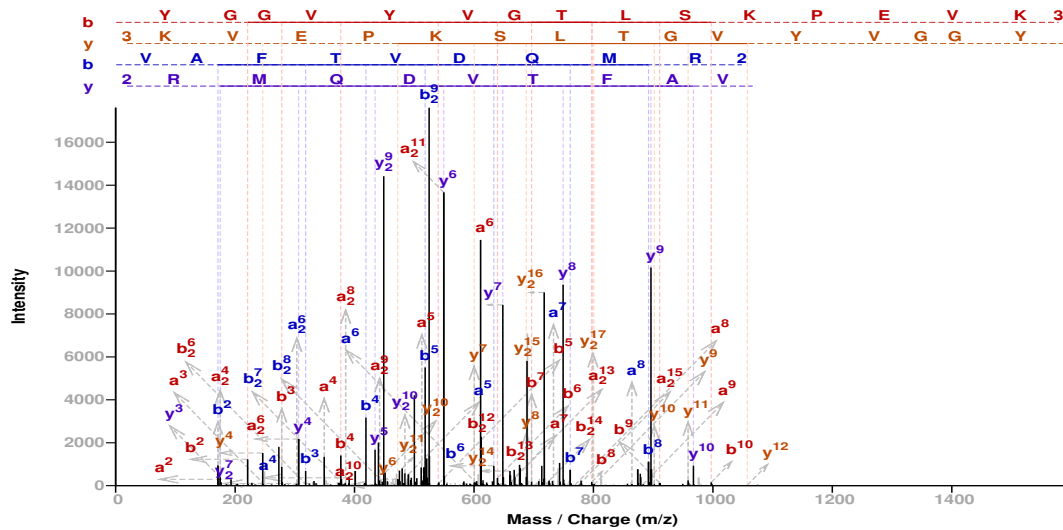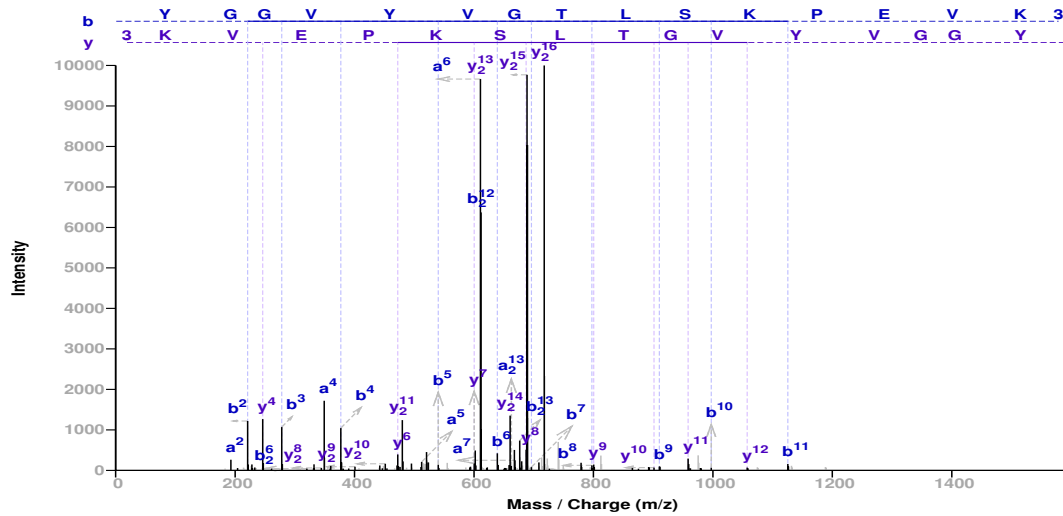



yeast00\_Scan\_Number\_6897 Precursor m/z: 583.318 cosine: 0.753  $\alpha$ : 0.597

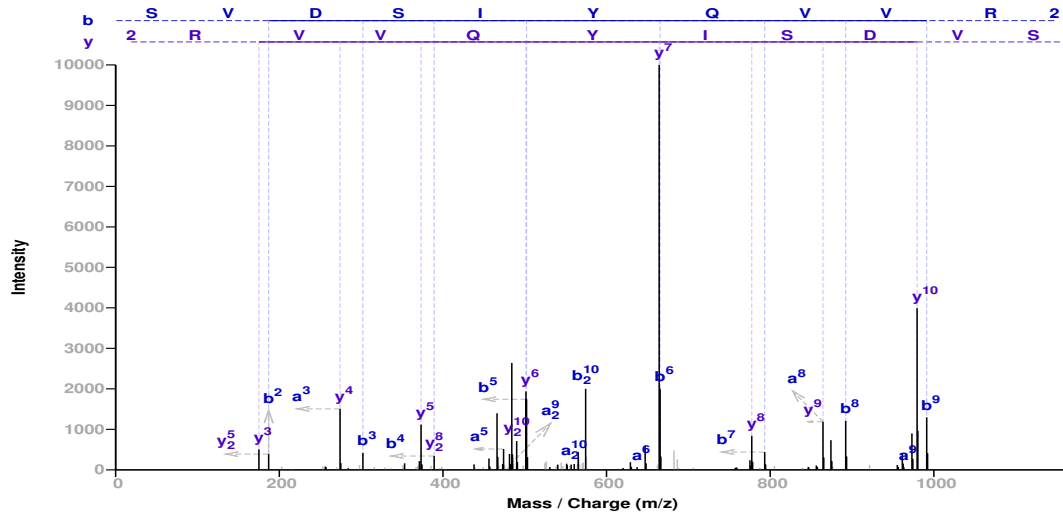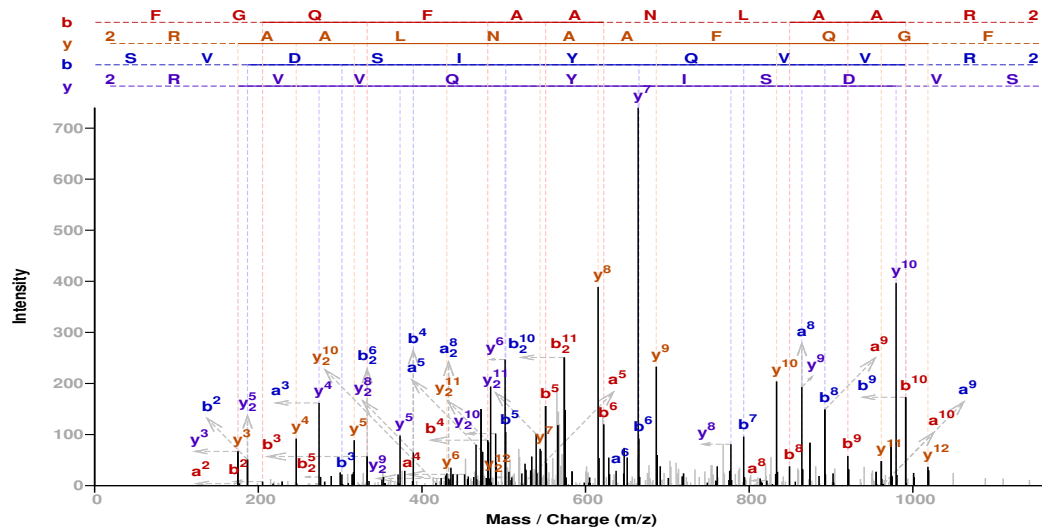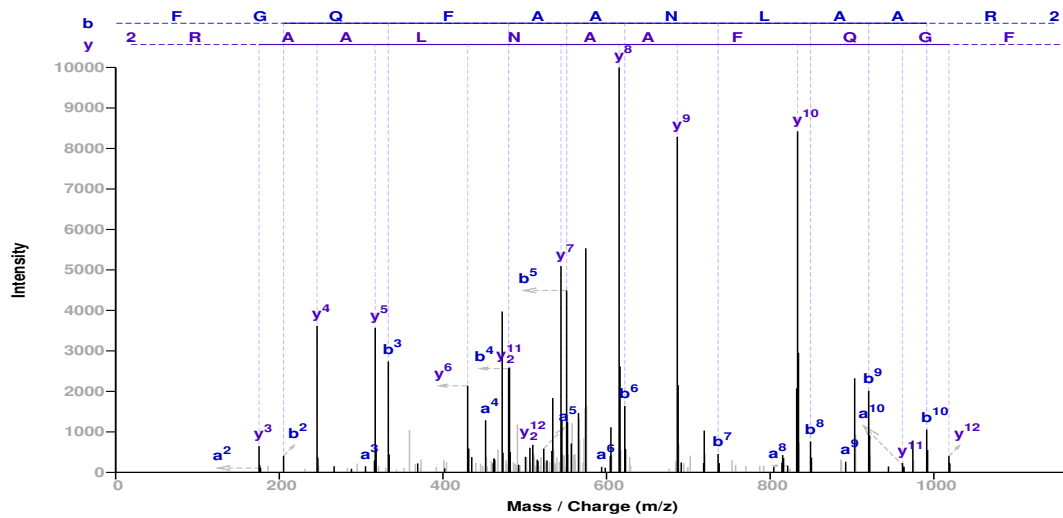

yeast00\_Scan\_Number\_7388 Precursor m/z: 449.794 cosine: 0.906  $\alpha$ : 0.595

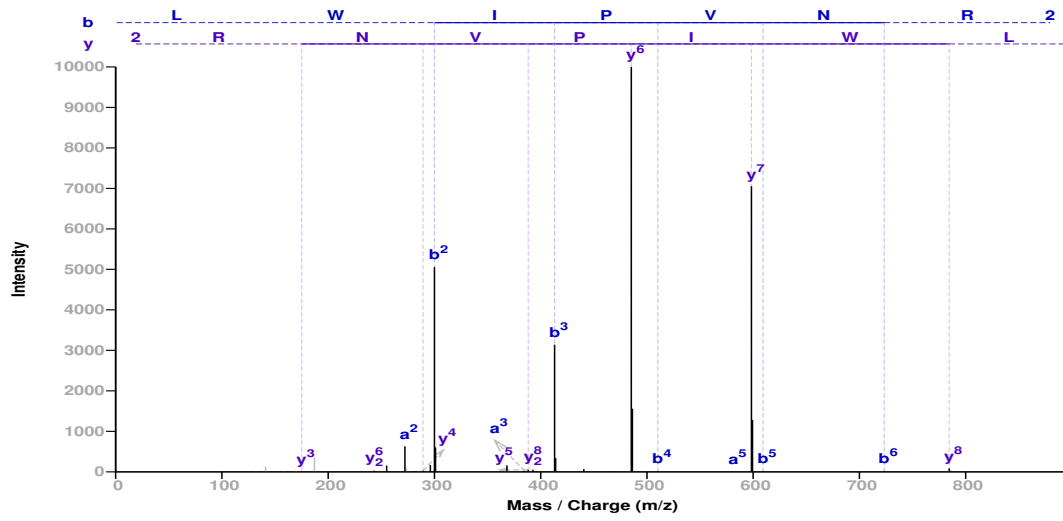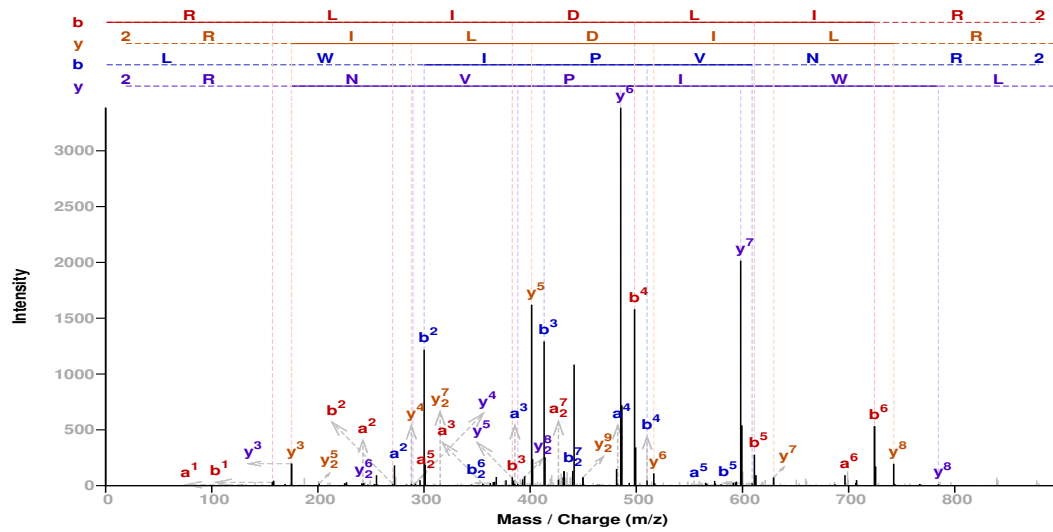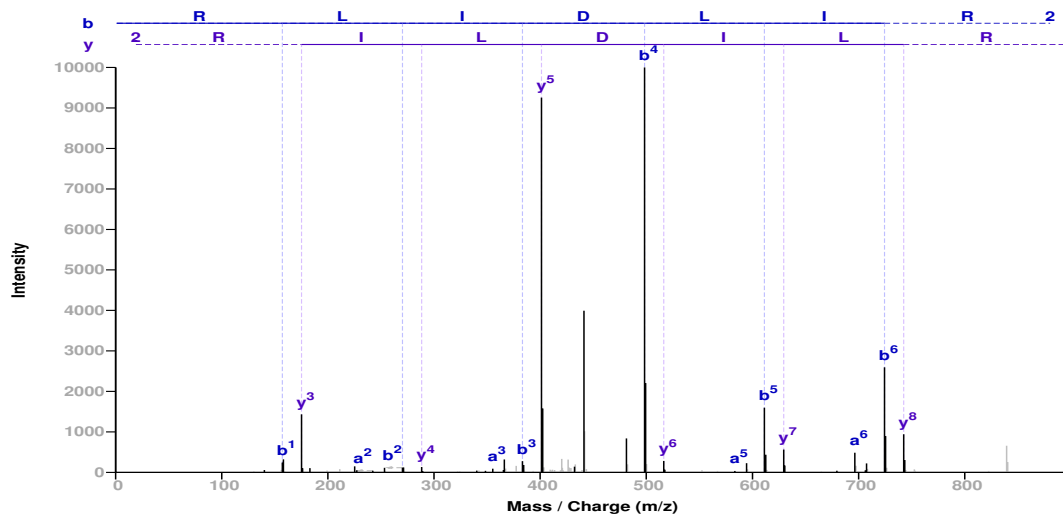

yeast00\_Scan\_Number\_4914 Precursor m/z: 472.761 cosine: 0.834  $\alpha$ : 0.595

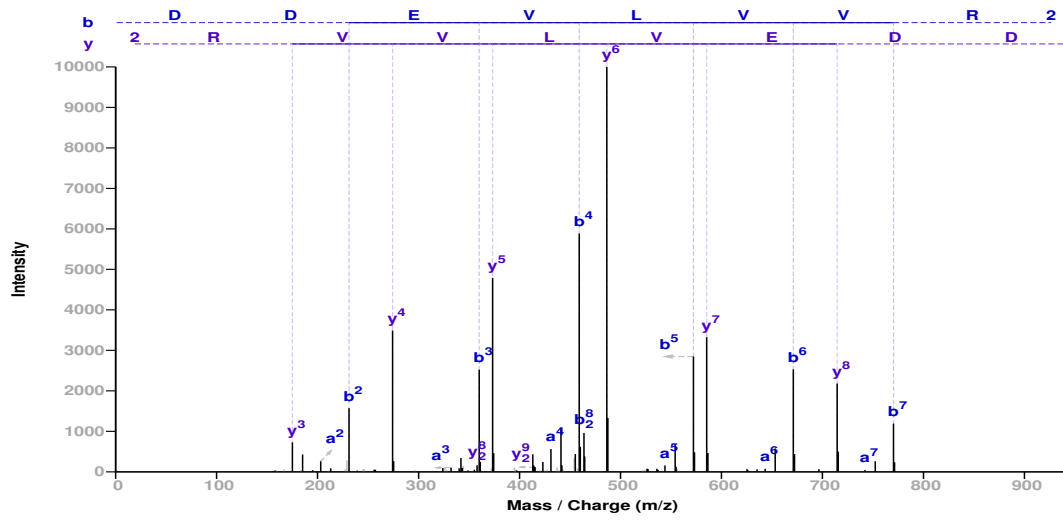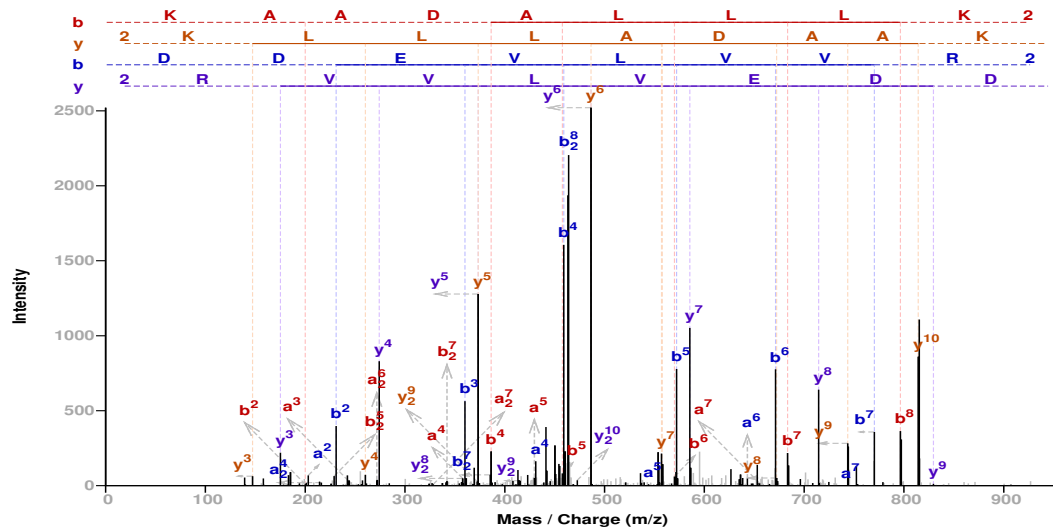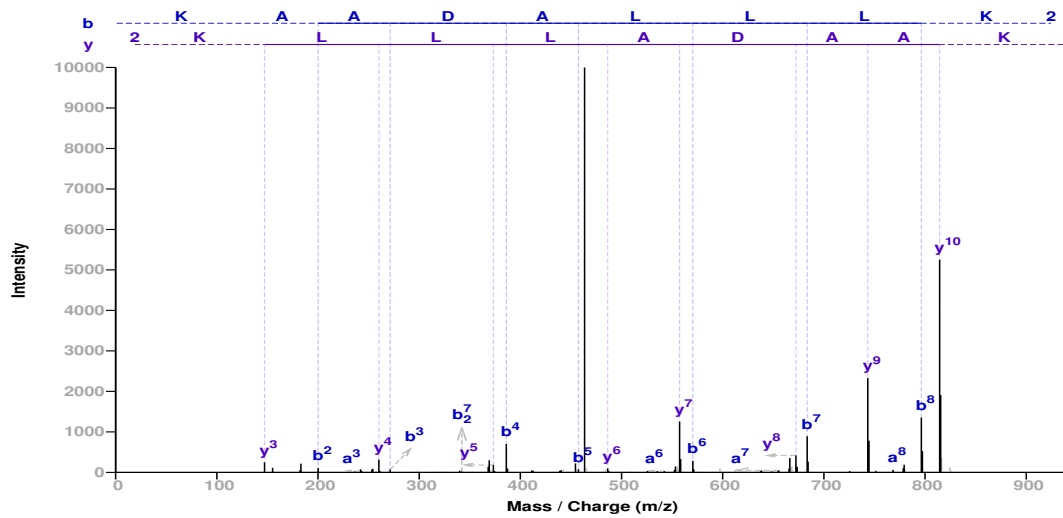

yeast00\_Scan\_Number\_8426 Precursor m/z: 559.801 cosine: 0.783  $\alpha$ : 0.591

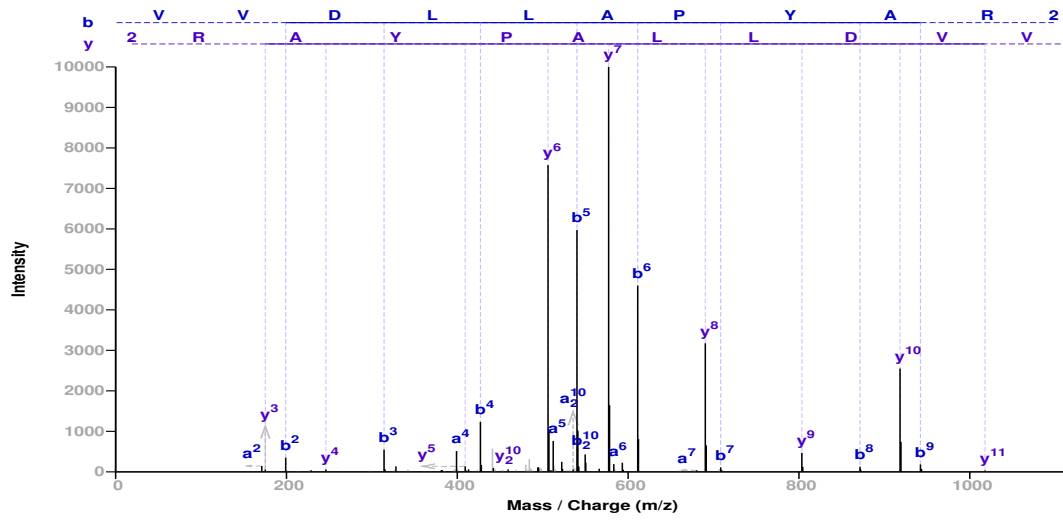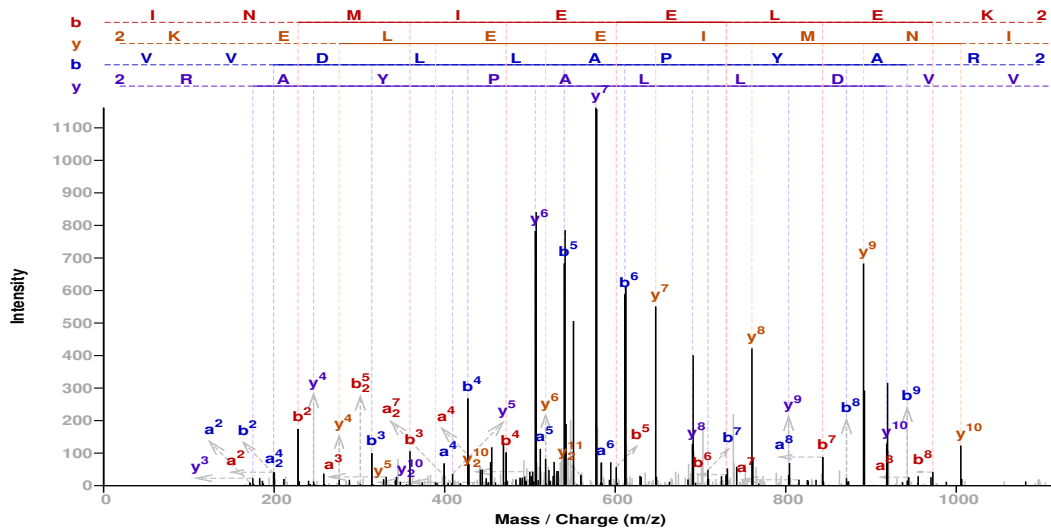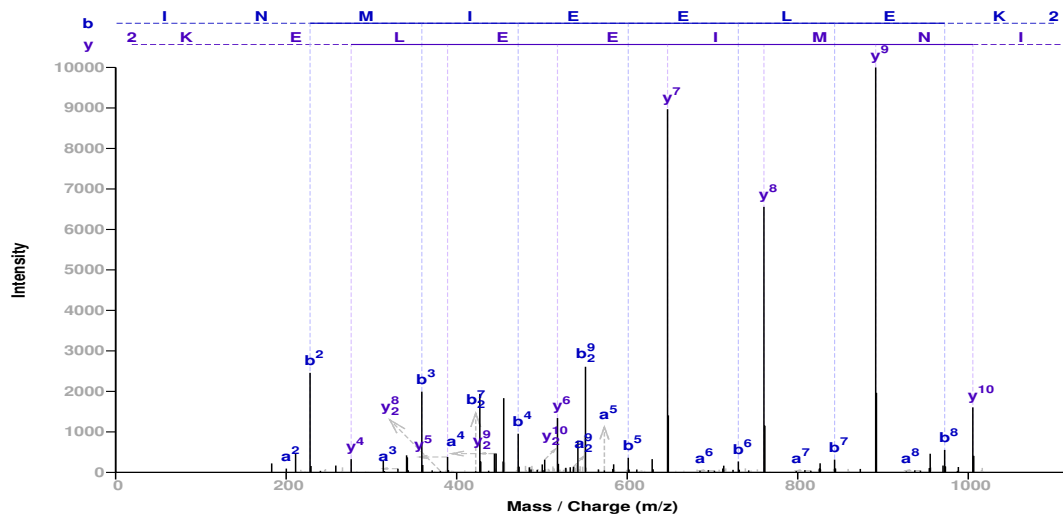

yeast00\_Scan\_Number\_4580 Precursor m/z: 481.739 cosine: 0.759  $\alpha$ : 0.589

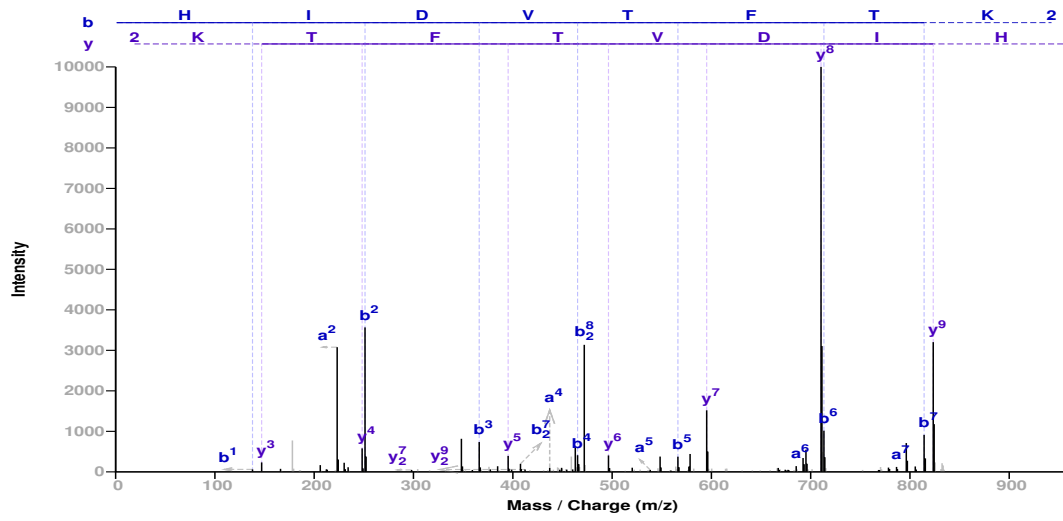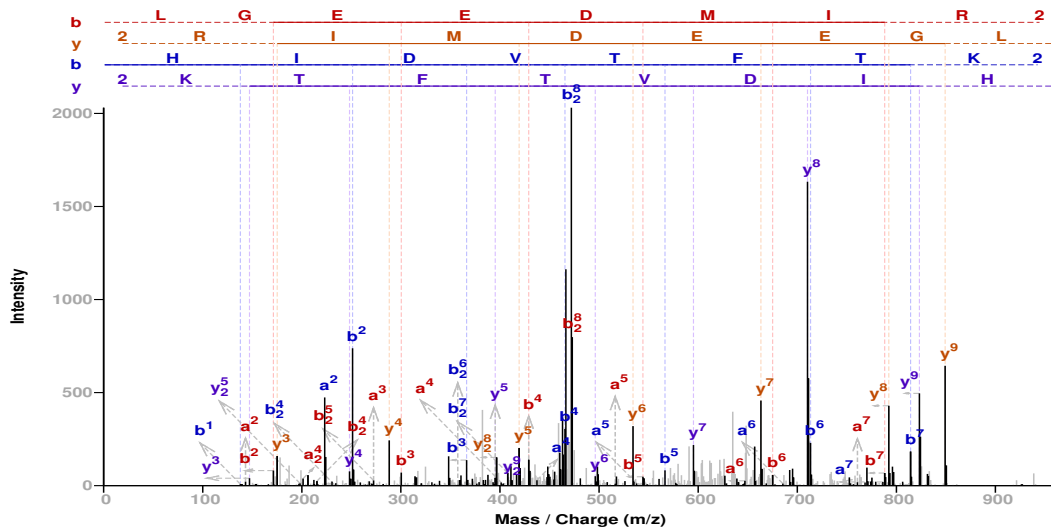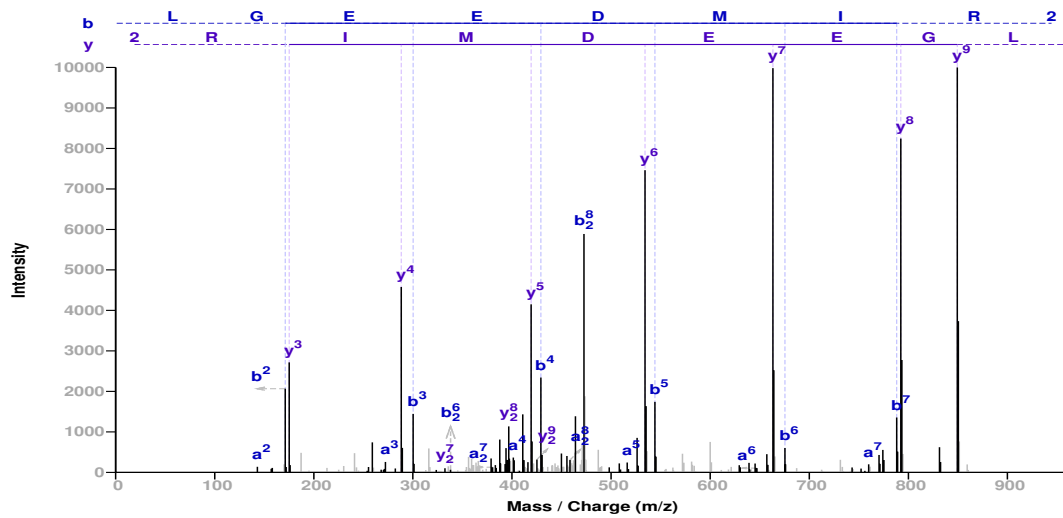

yeast00\_Scan\_Number\_7528 Precursor m/z: 518.282 cosine: 0.752  $\alpha$ : 0.586

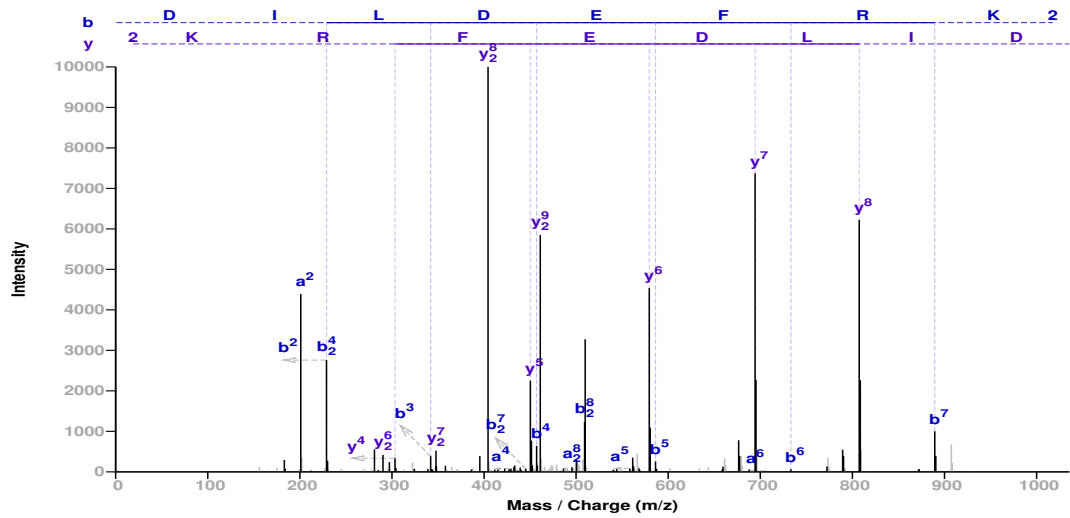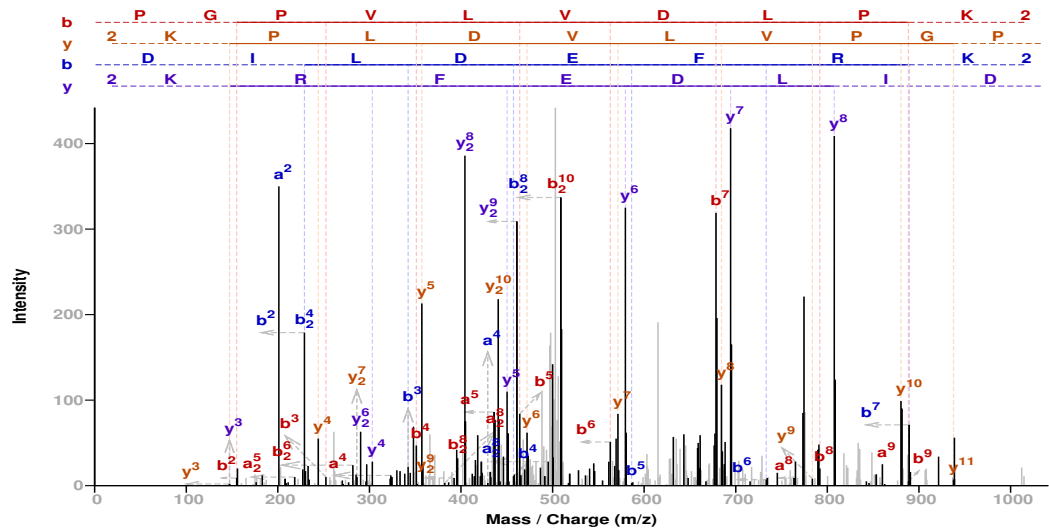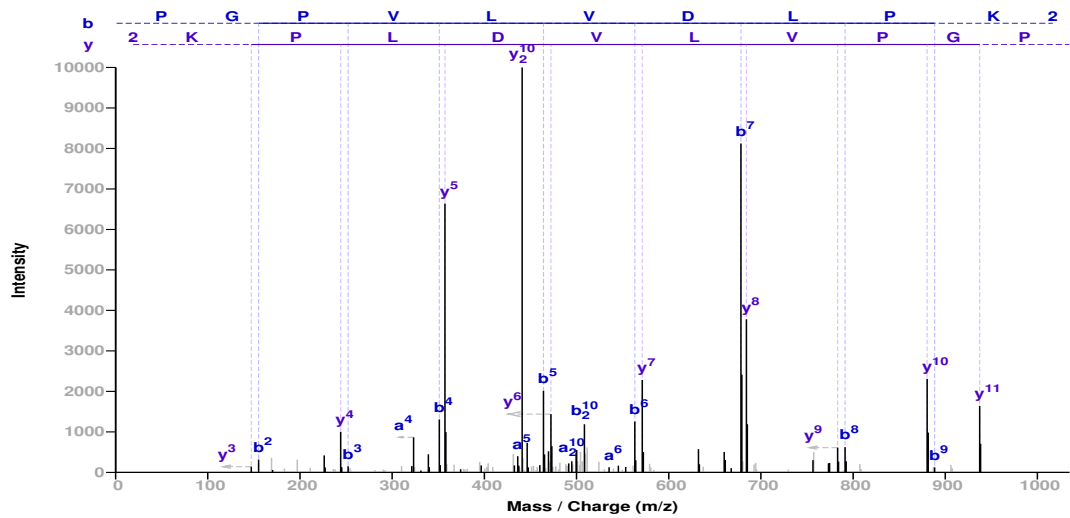

yeast00\_Scan\_Number\_4457 Precursor m/z: 379.233 cosine: 0.745  $\alpha$ : 0.579

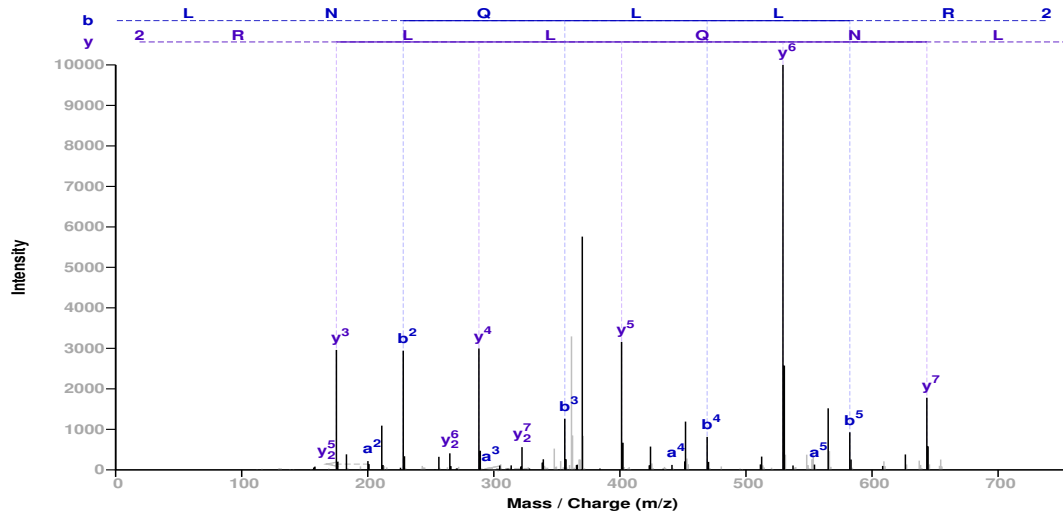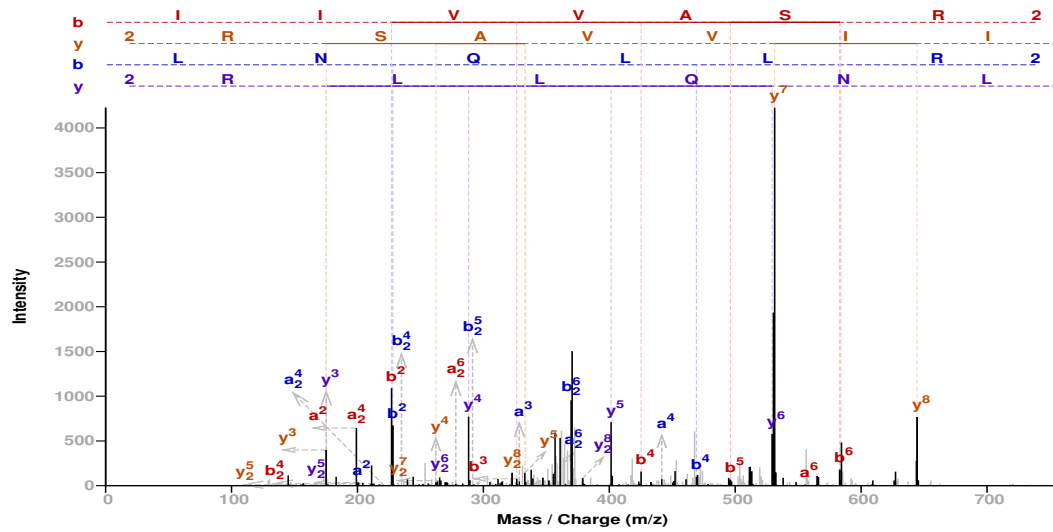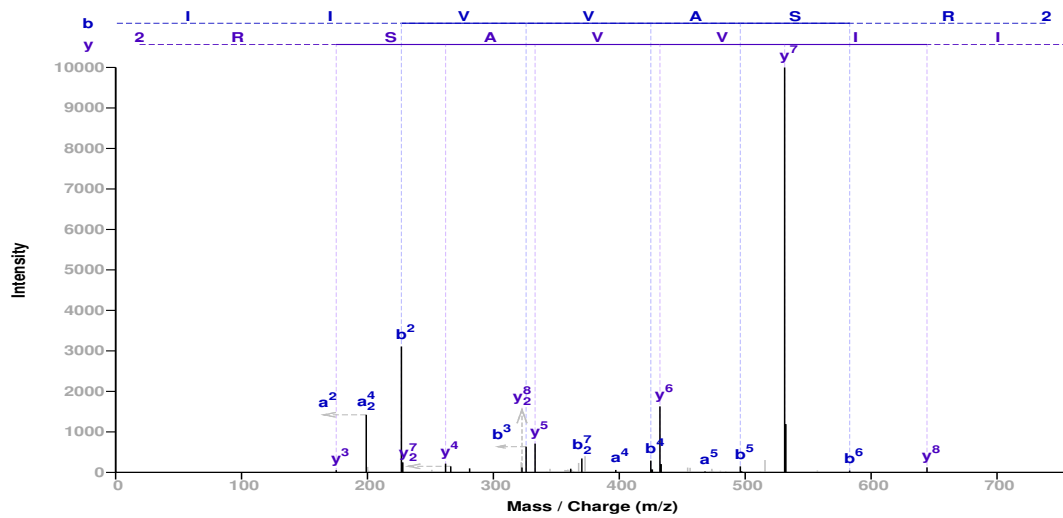

yeast00.Scan\_Number\_6428 Precursor m/z: 619.658 cosine: 0.772  $\alpha$ : 0.578

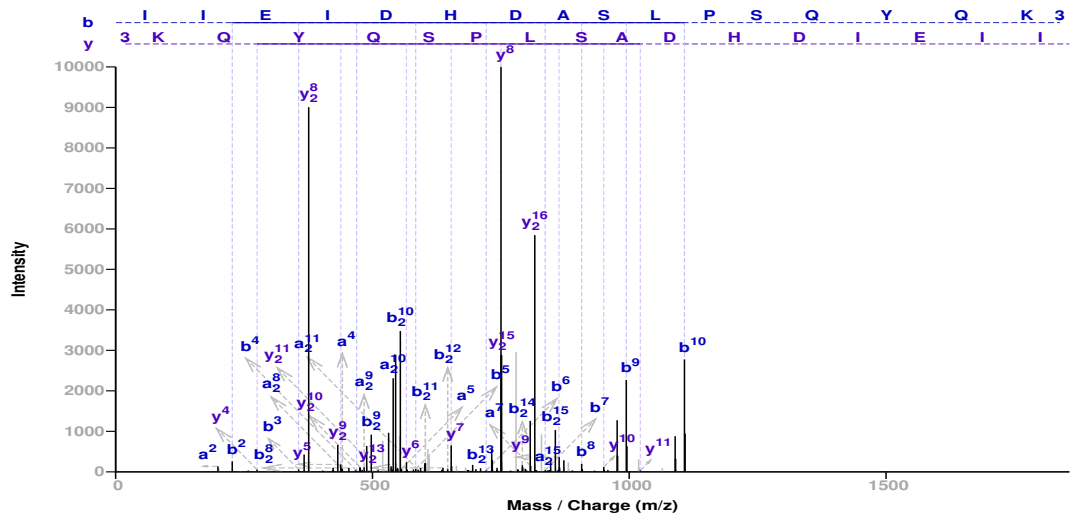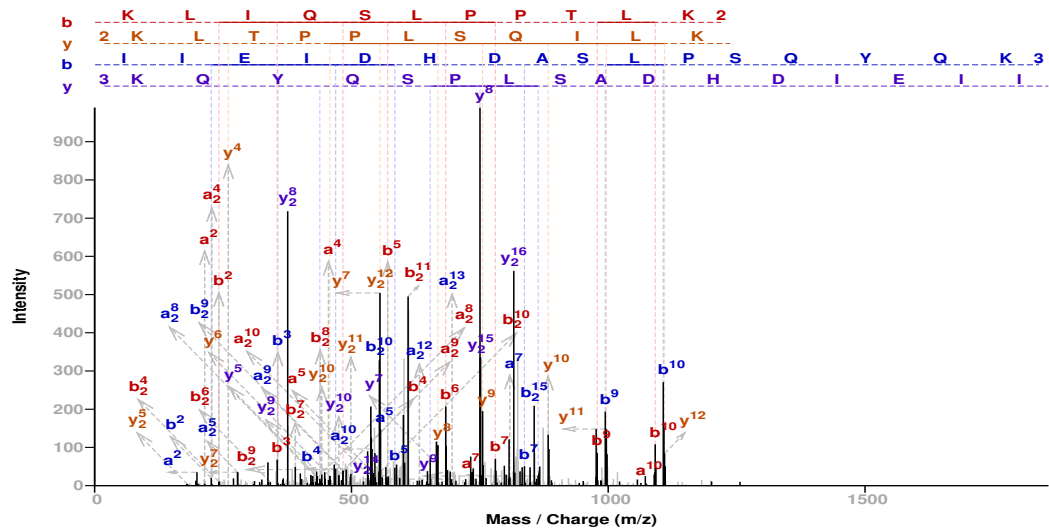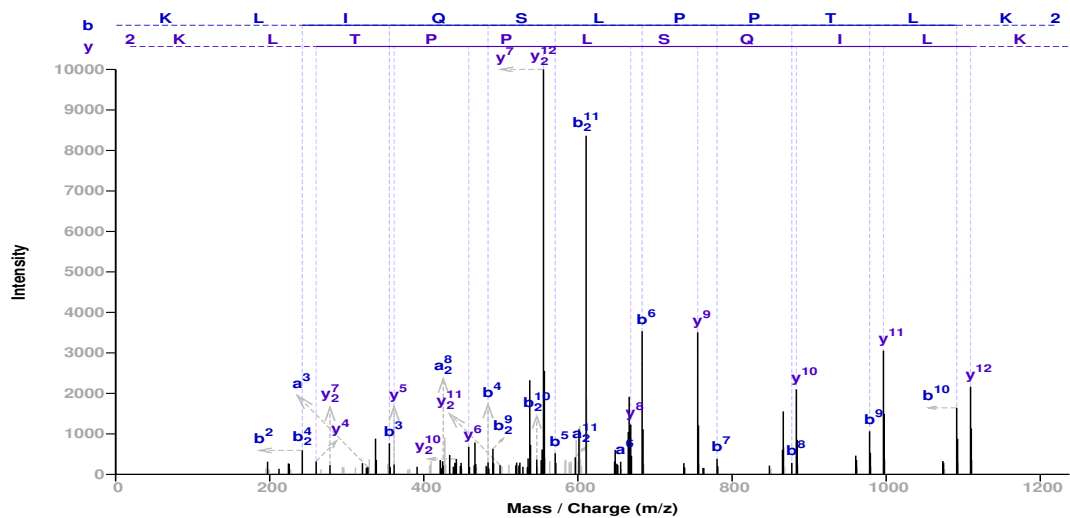



yeast00\_Scan\_Number\_5173 Precursor m/z: 454.268 cosine: 0.736  $\alpha$ : 0.578

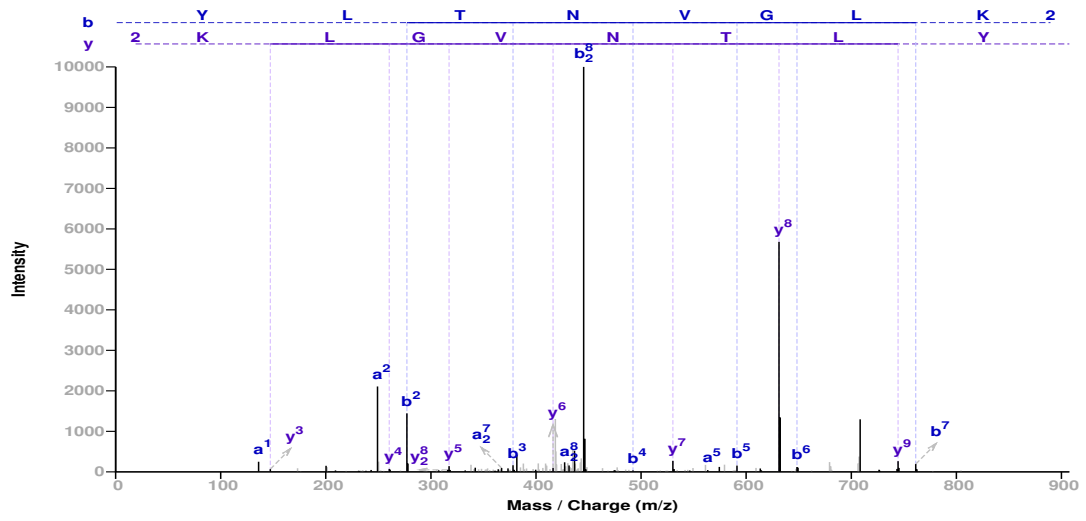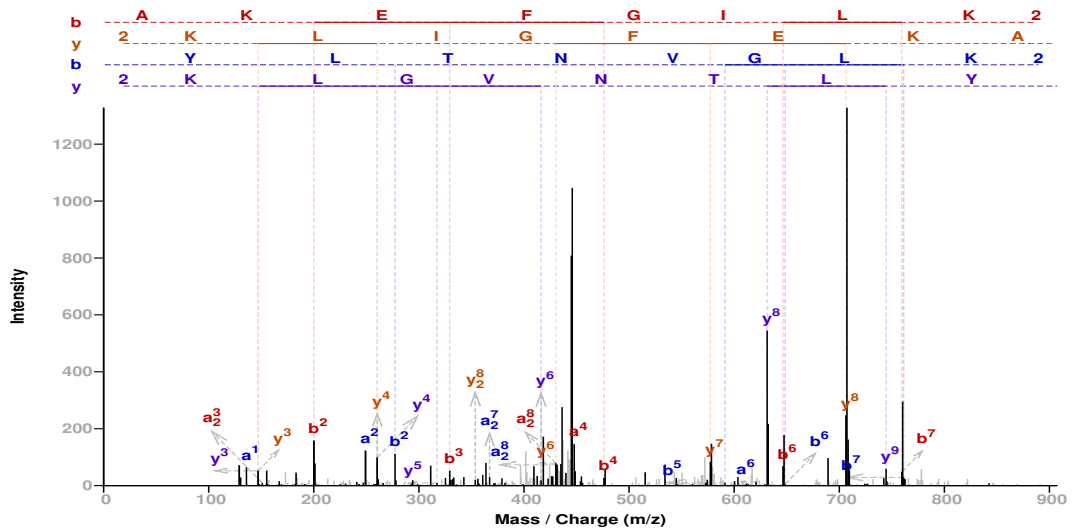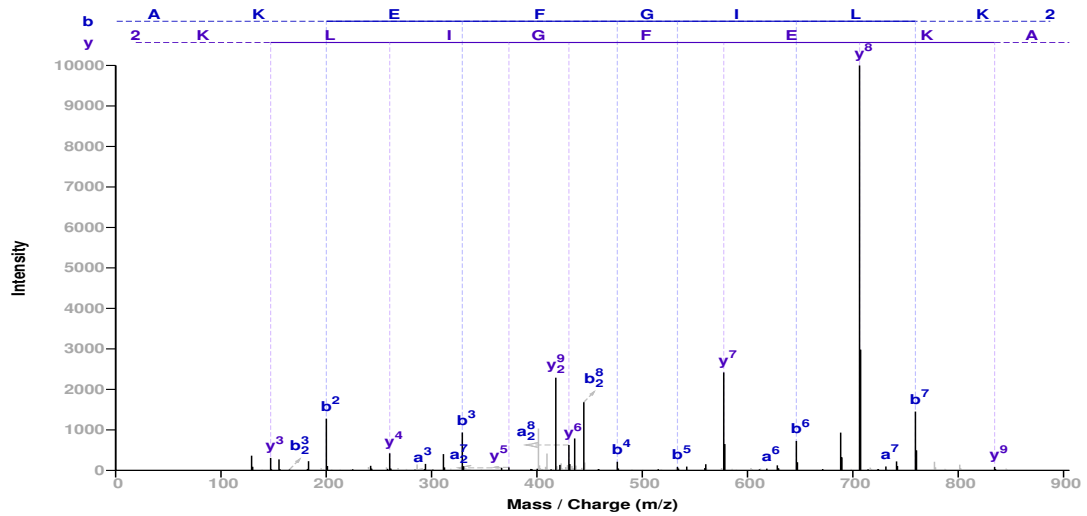

yeast00\_Scan\_Number\_3456 Precursor m/z: 461.249 cosine: 0.768  $\alpha$ : 0.577

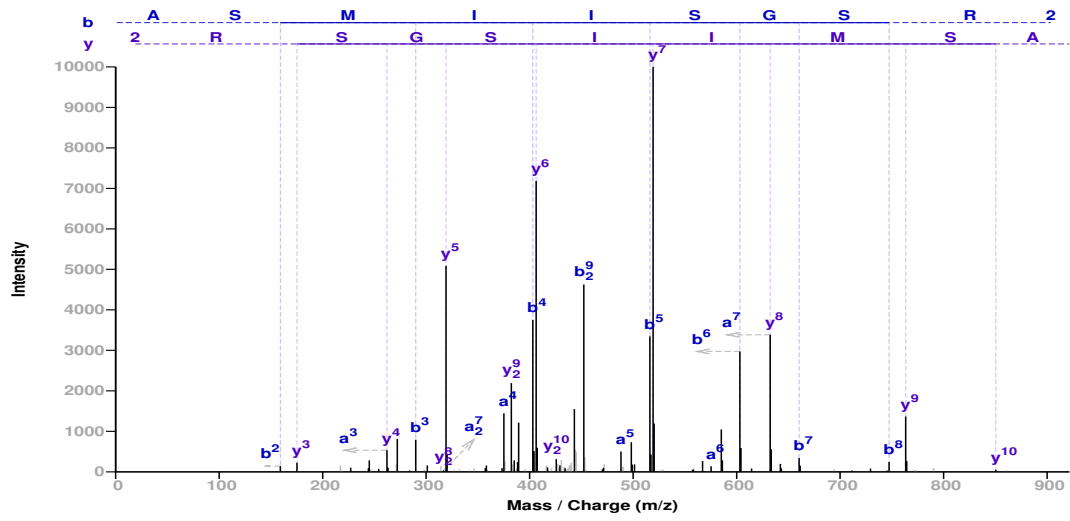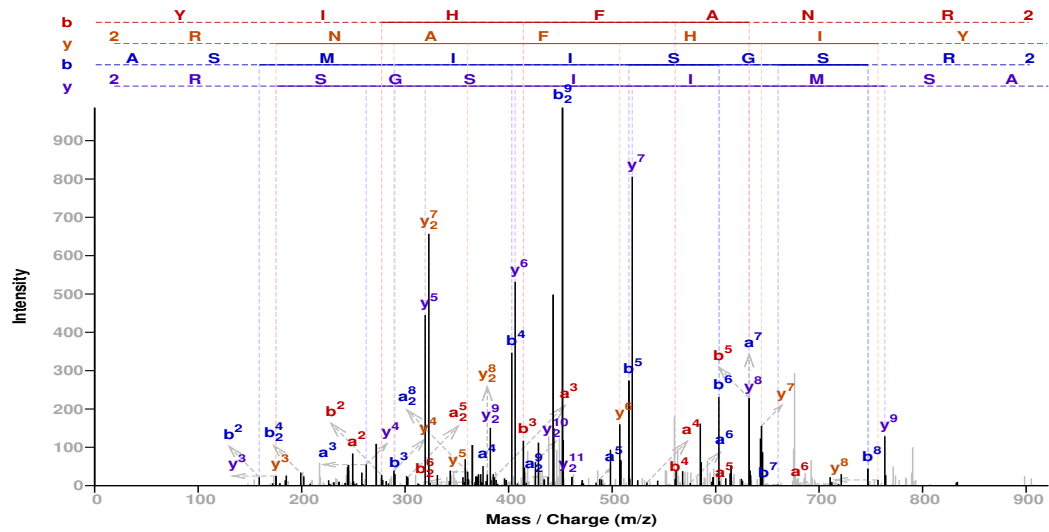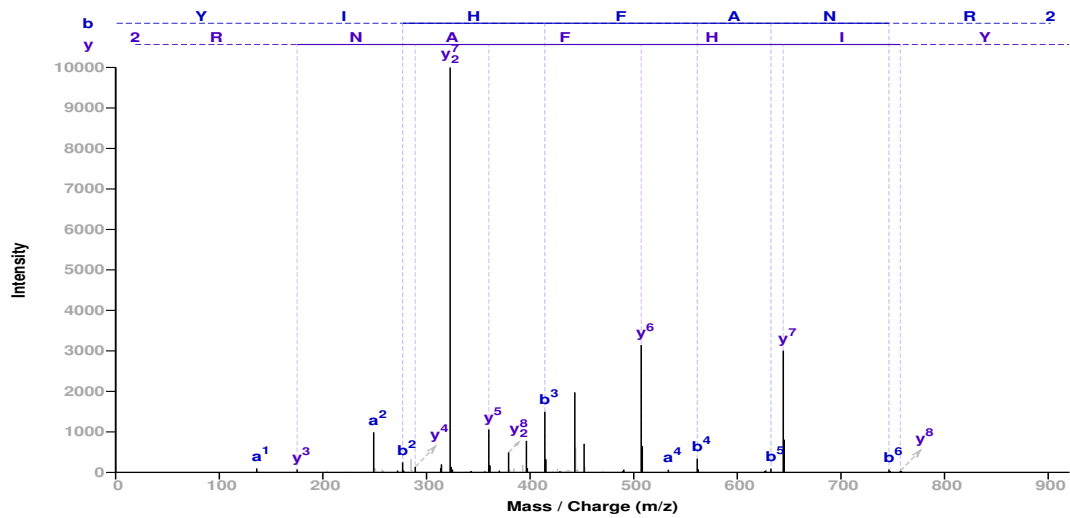

yeast00\_Scan\_Number\_7070 Precursor m/z: 531.789 cosine: 0.749  $\alpha$ : 0.569

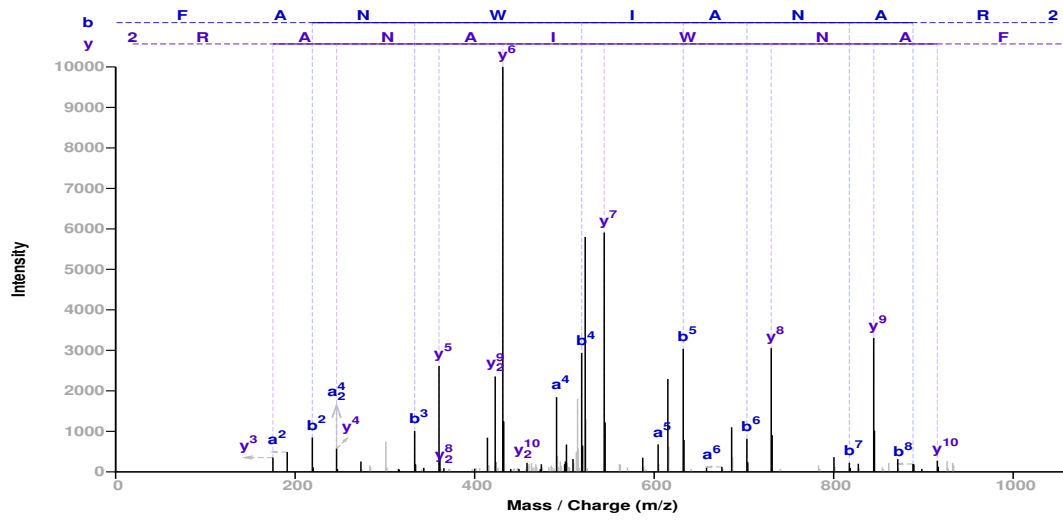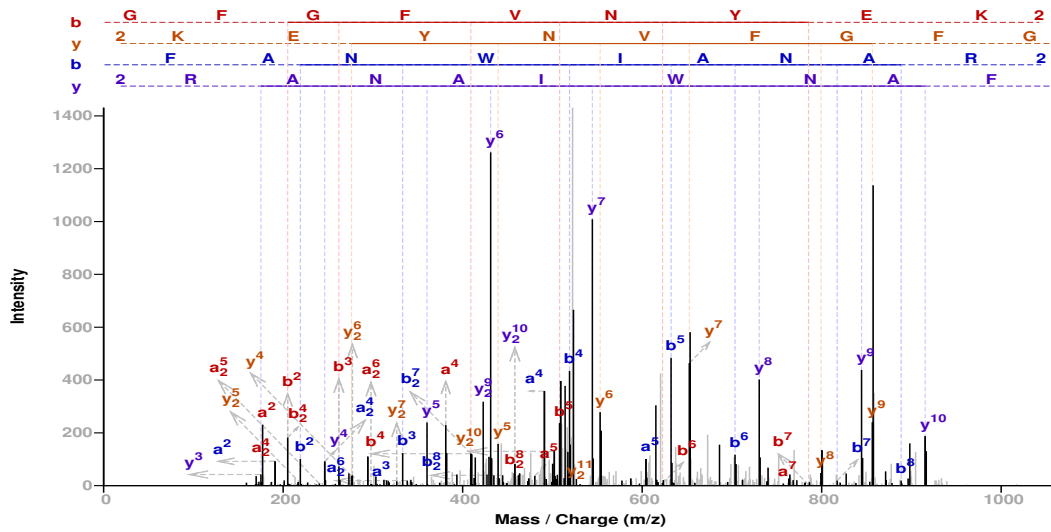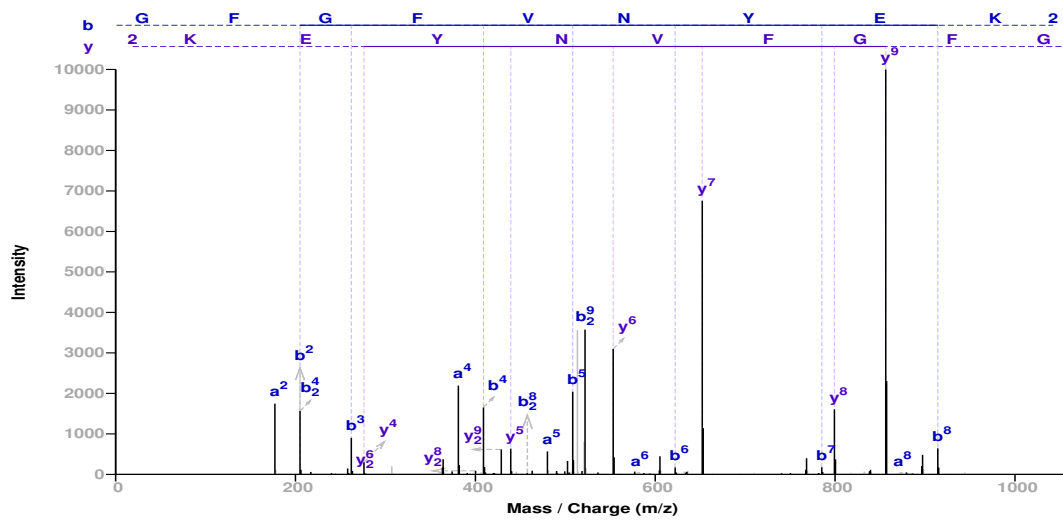

yeast00\_Scan\_Number\_7800 Precursor m/z: 496.290 cosine: 0.748  $\alpha$ : 0.568

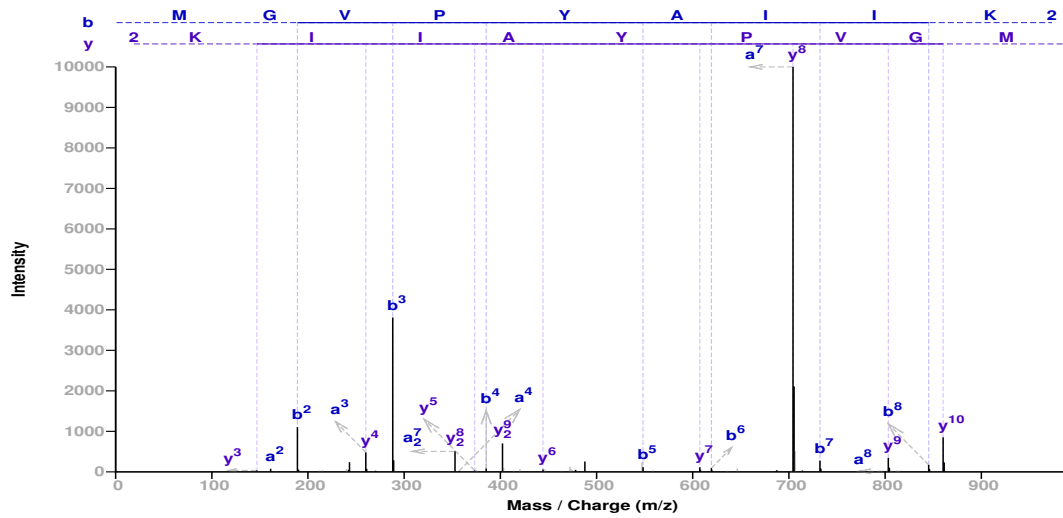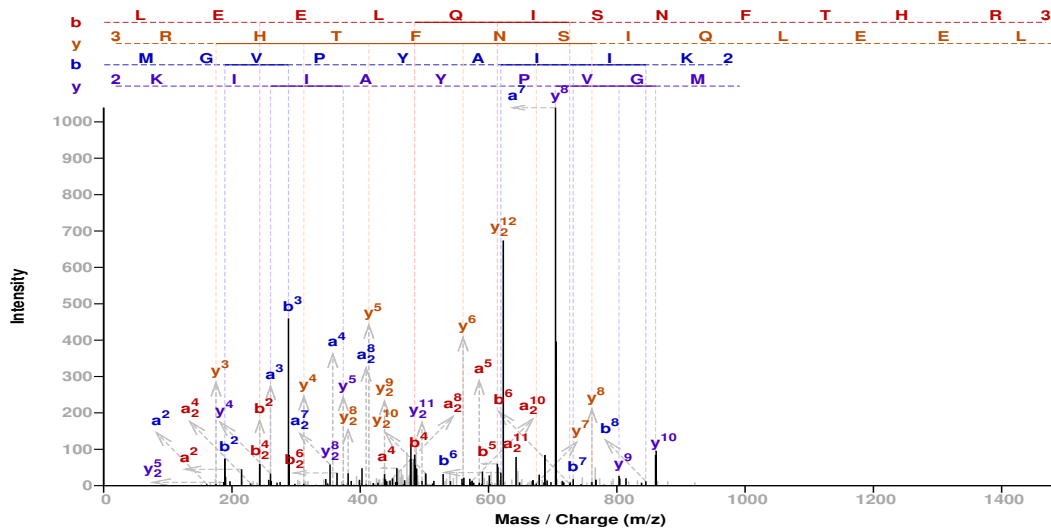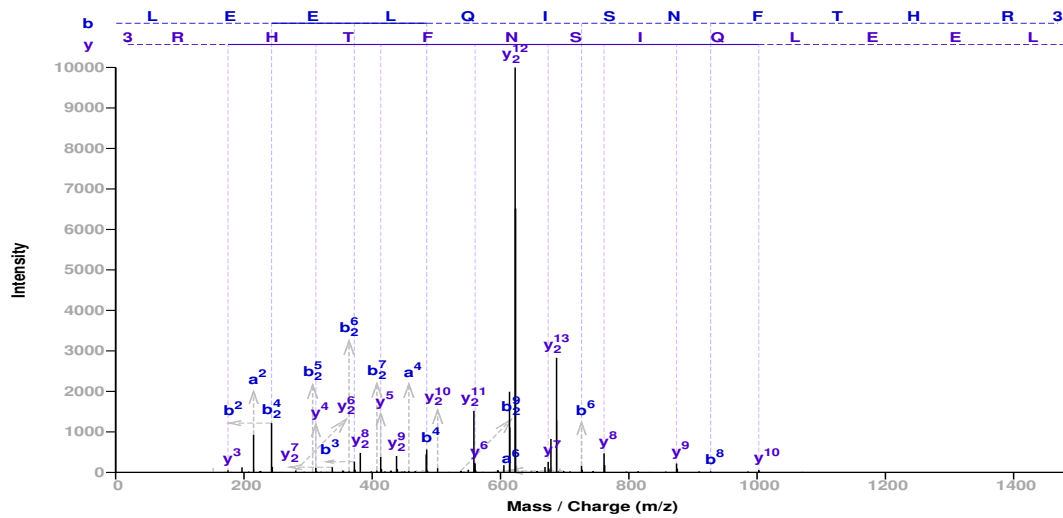

yeast00\_Scan\_Number\_6108 Precursor m/z: 497.606 cosine: 0.803  $\alpha$ : 0.560

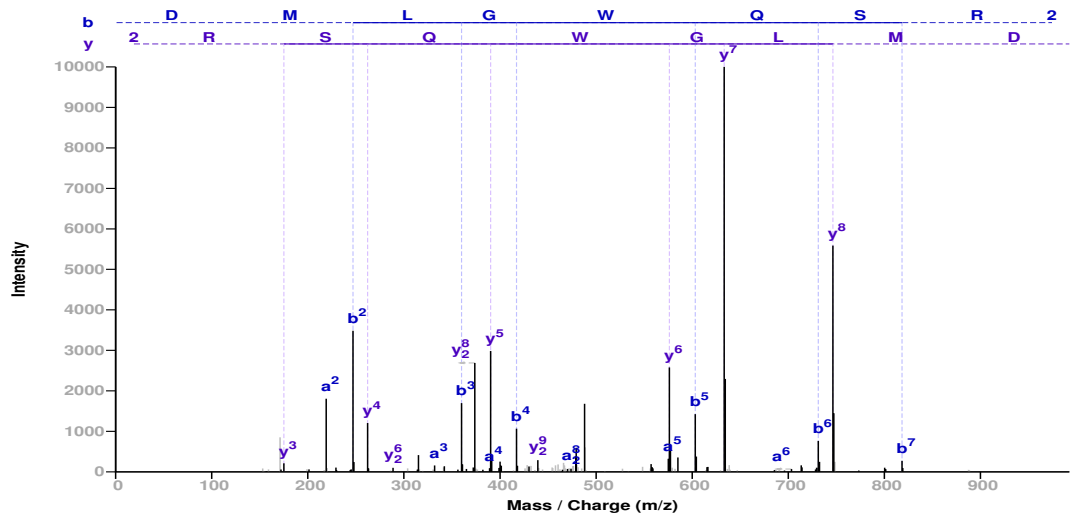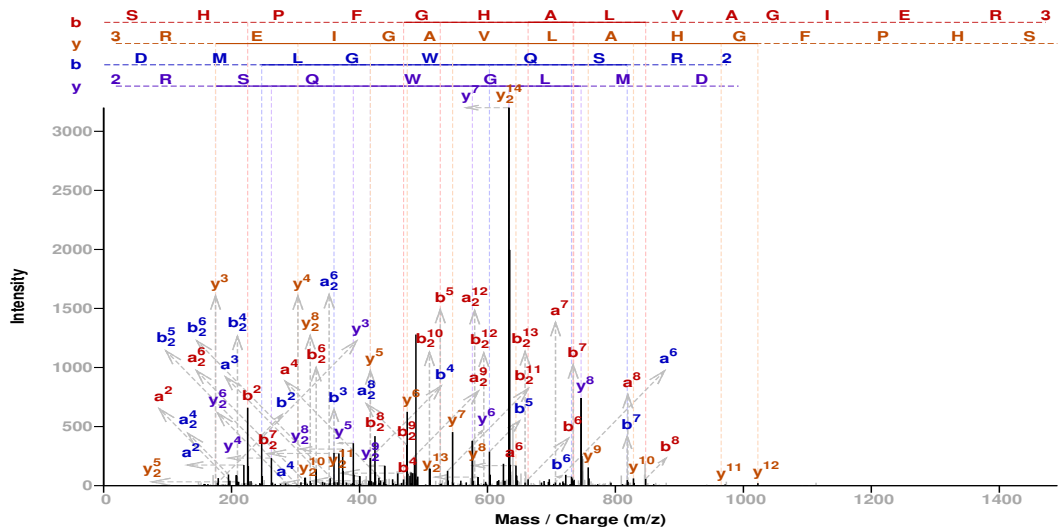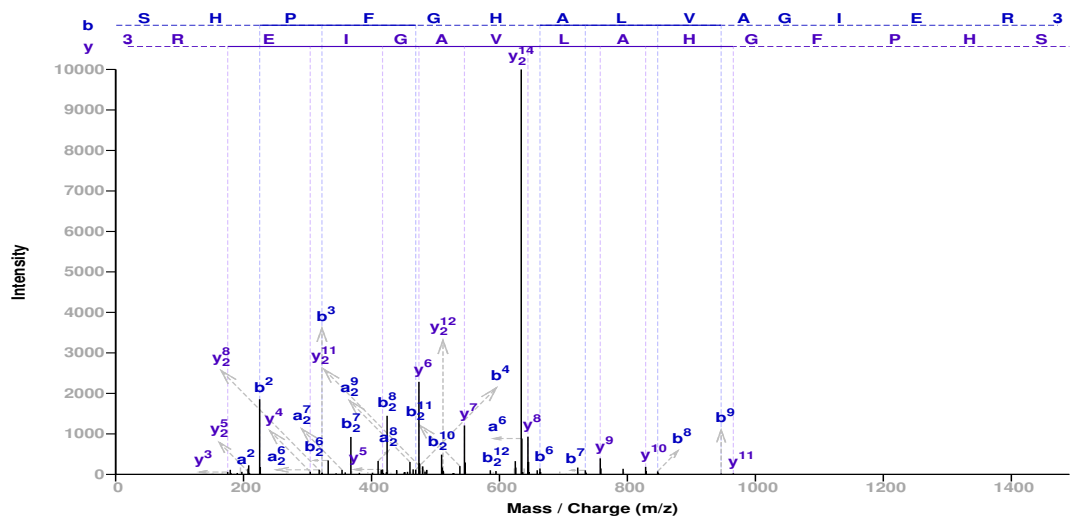

yeast00\_Scan\_Number\_6110 Precursor m/z: 397.488 cosine: 0.758  $\alpha$ : 0.558

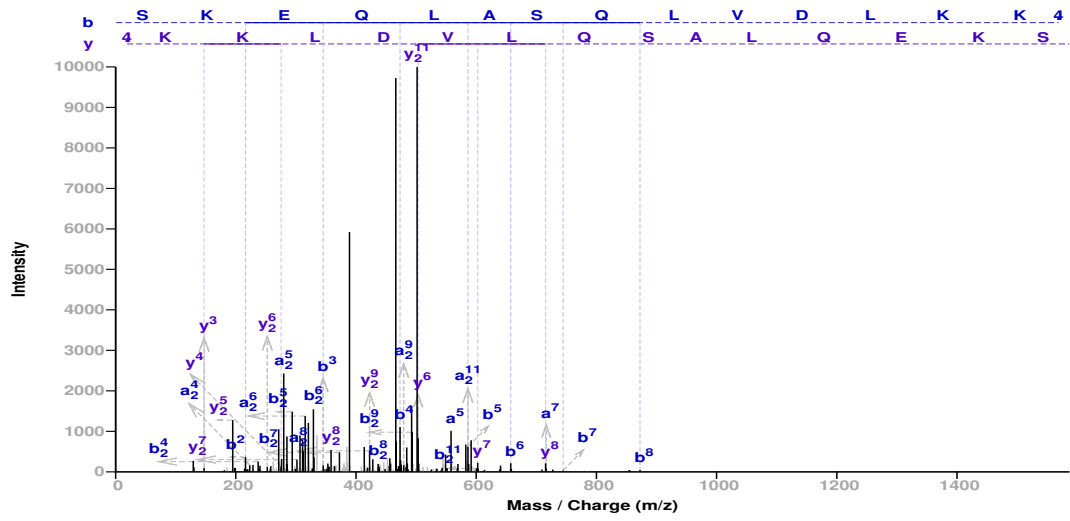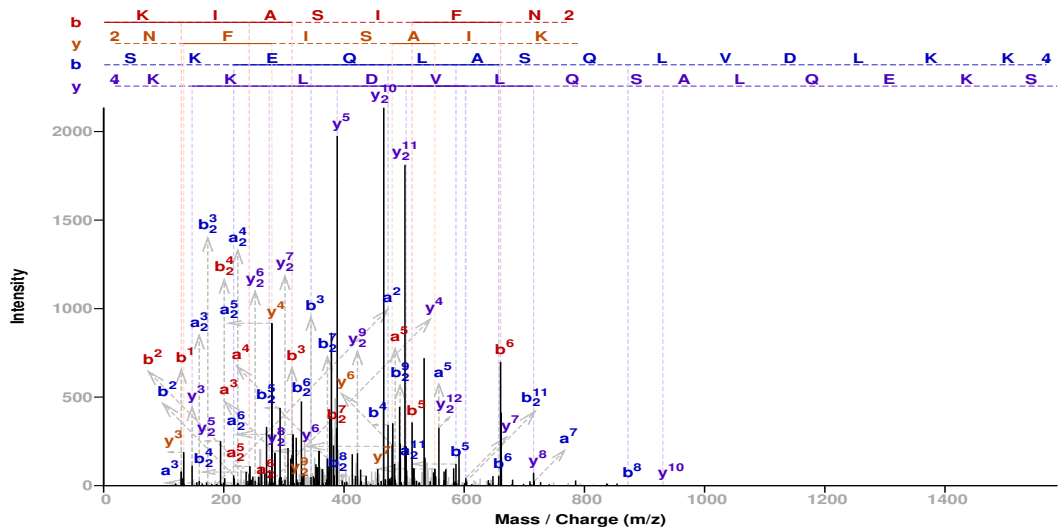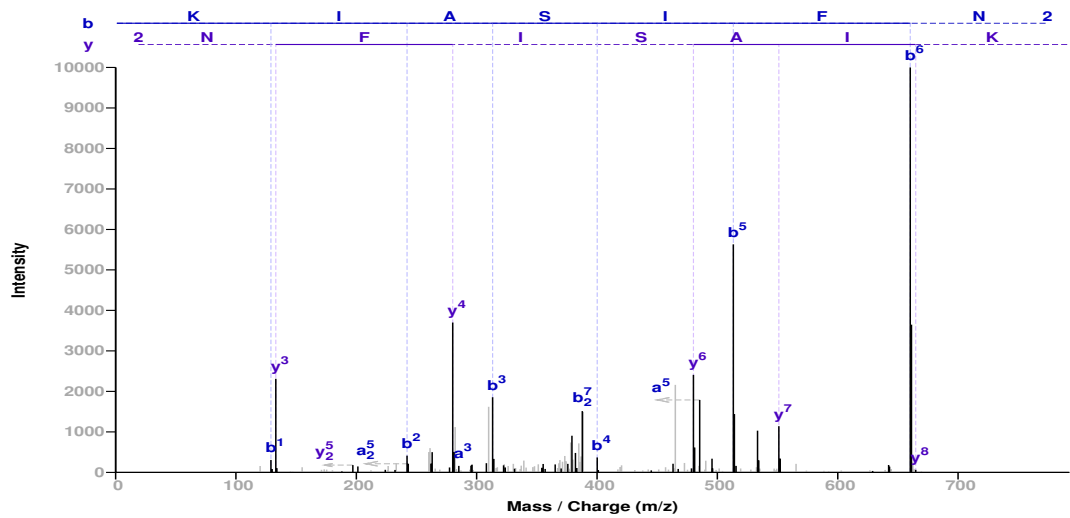

yeast00.Scan\_Number\_2923 Precursor m/z: 409.225 cosine: 0.861  $\alpha$ : 0.557

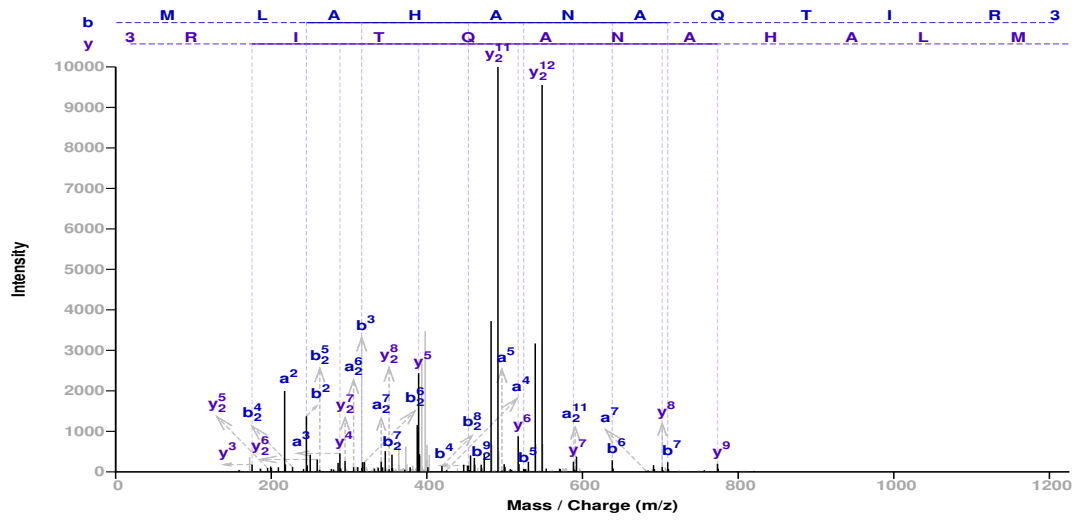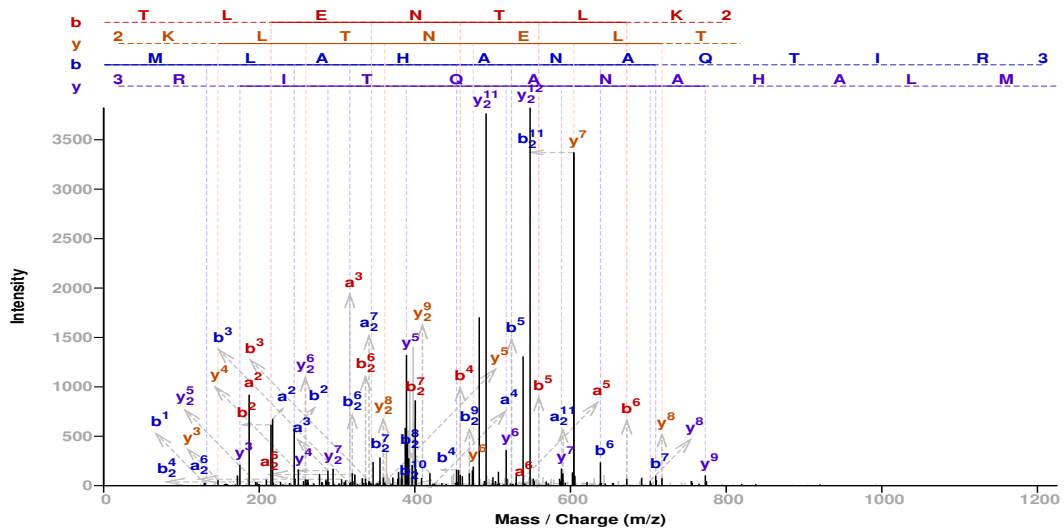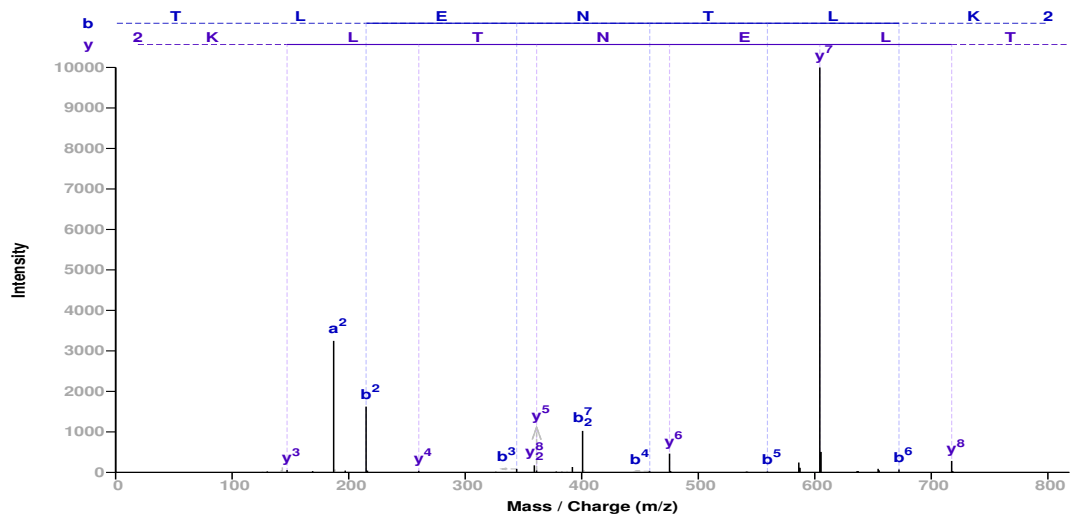

yeast00\_Scan\_Number\_4054 Precursor m/z: 441.572 cosine: 0.744  $\alpha$ : 0.557

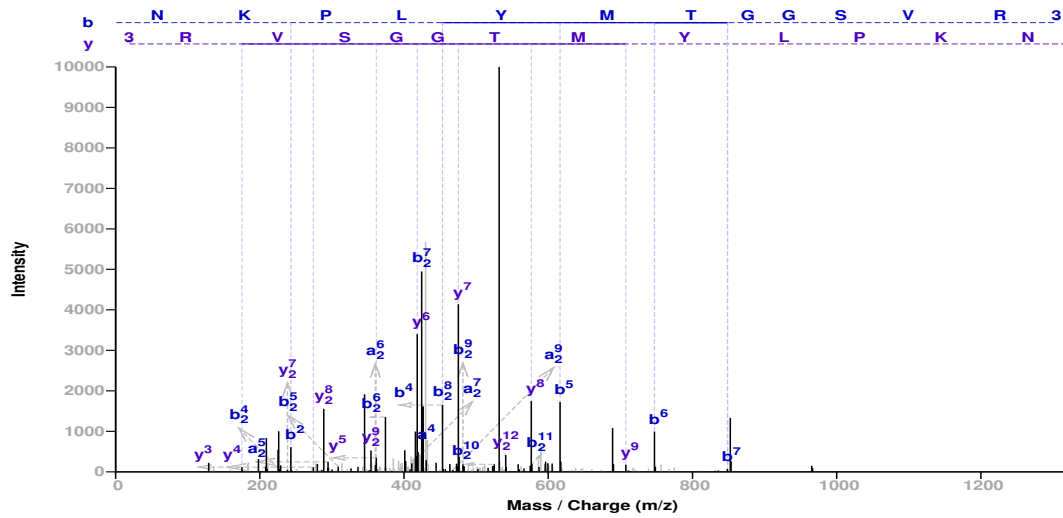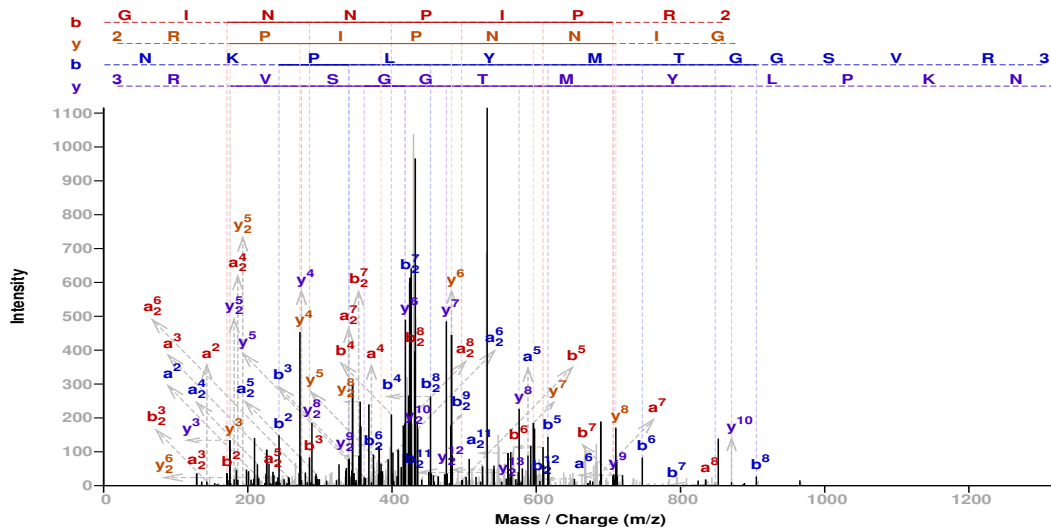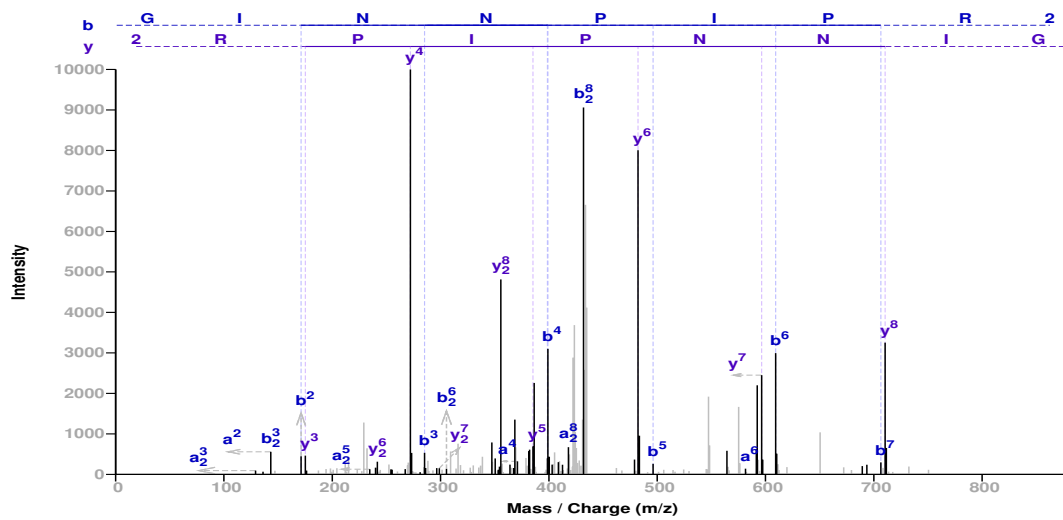



yeast00\_Scan\_Number\_5226 Precursor m/z: 566.273 cosine: 0.739  $\alpha$ : 0.551

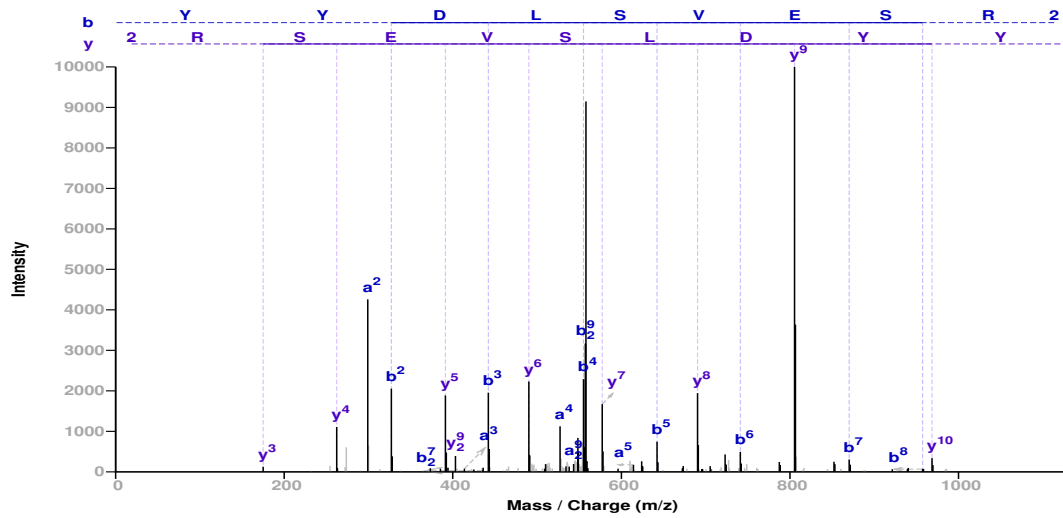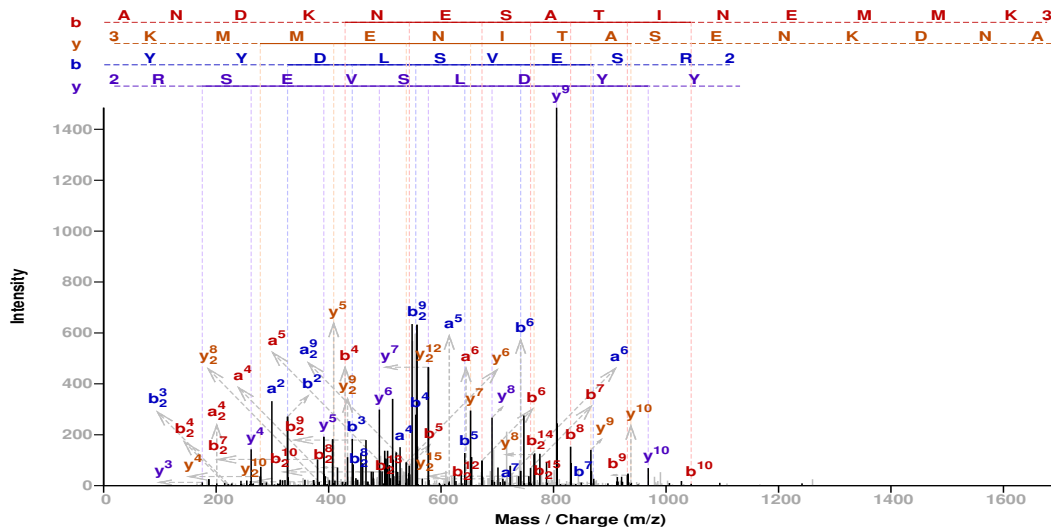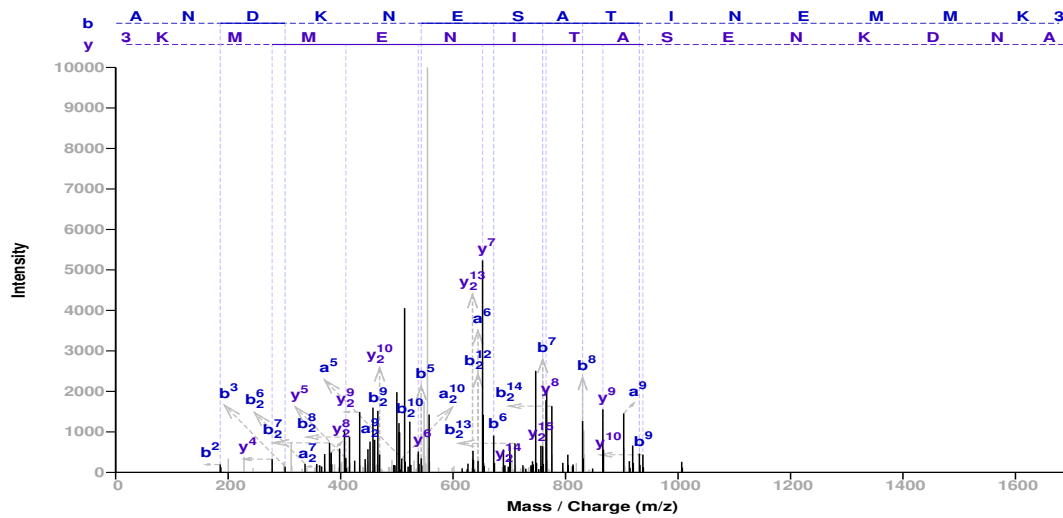

yeast00\_Scan\_Number\_4276 Precursor m/z: 562.813 cosine: 0.846  $\alpha$ : 0.547

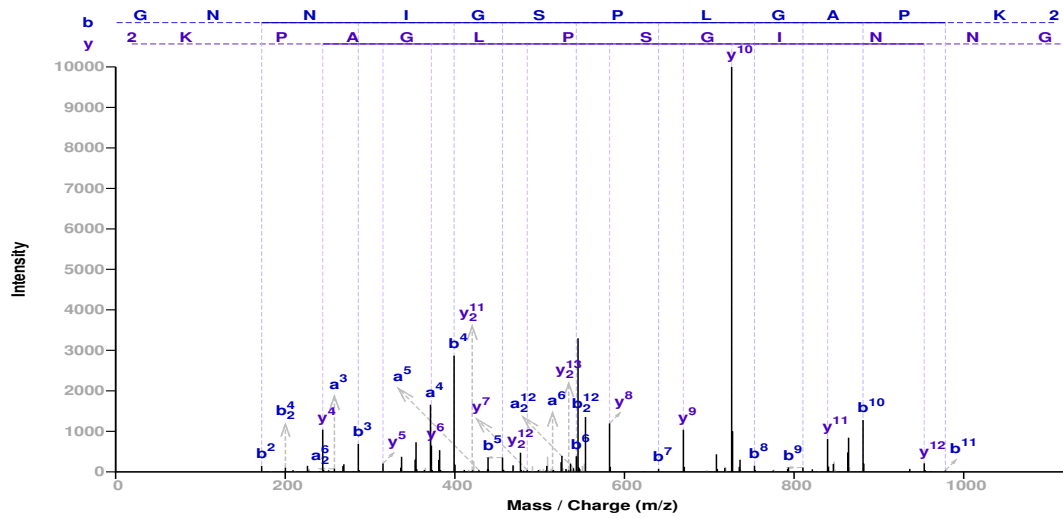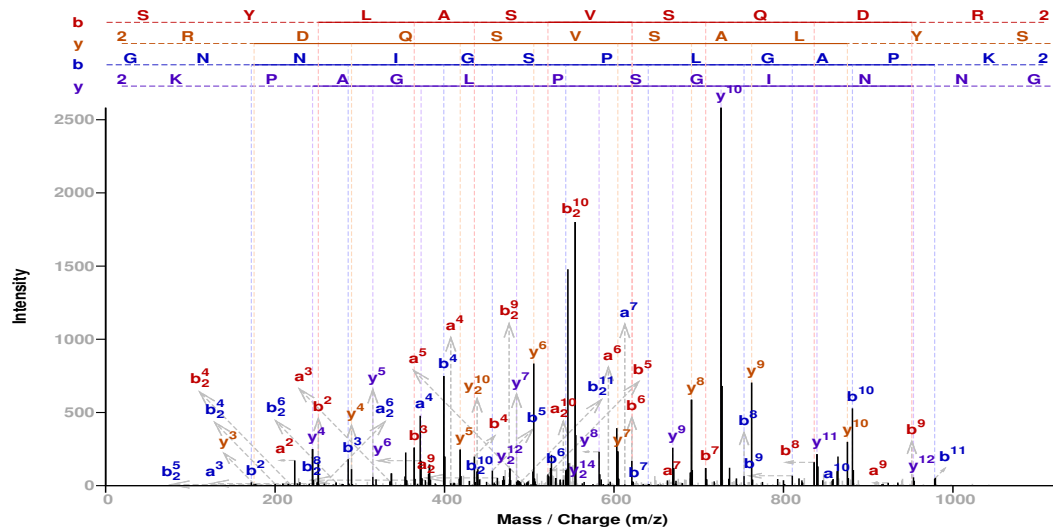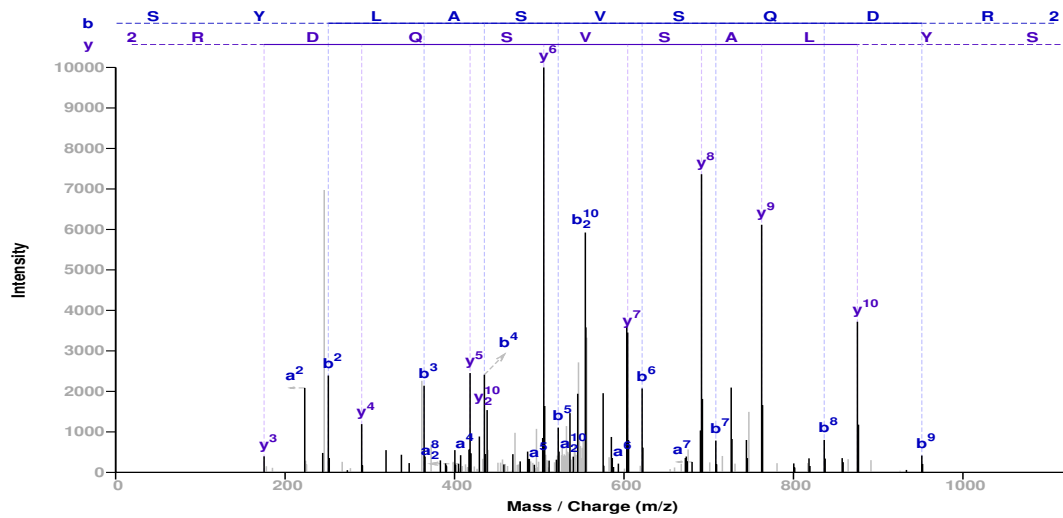

yeast00\_Scan\_Number\_6954 Precursor m/z: 546.639 cosine: 0.756  $\alpha$ : 0.546

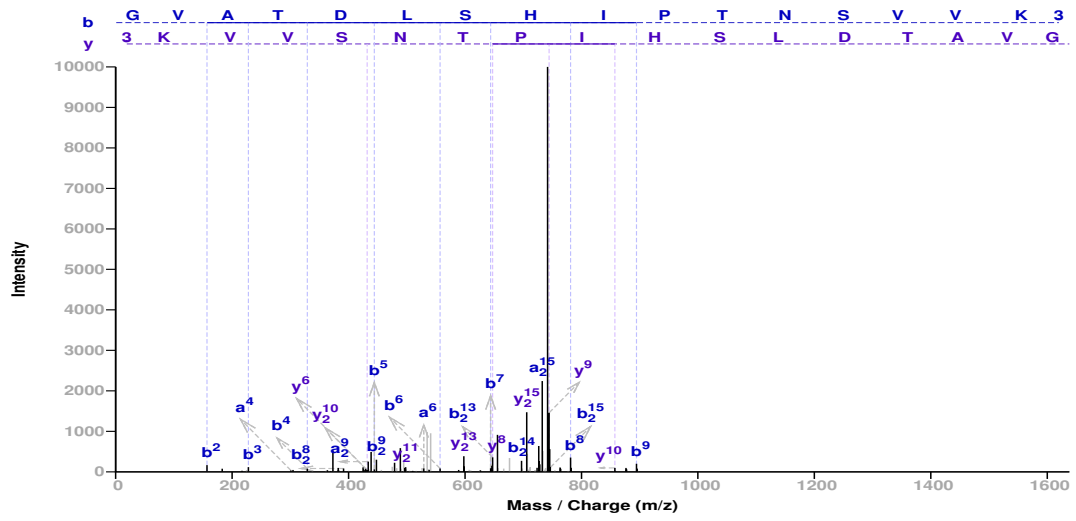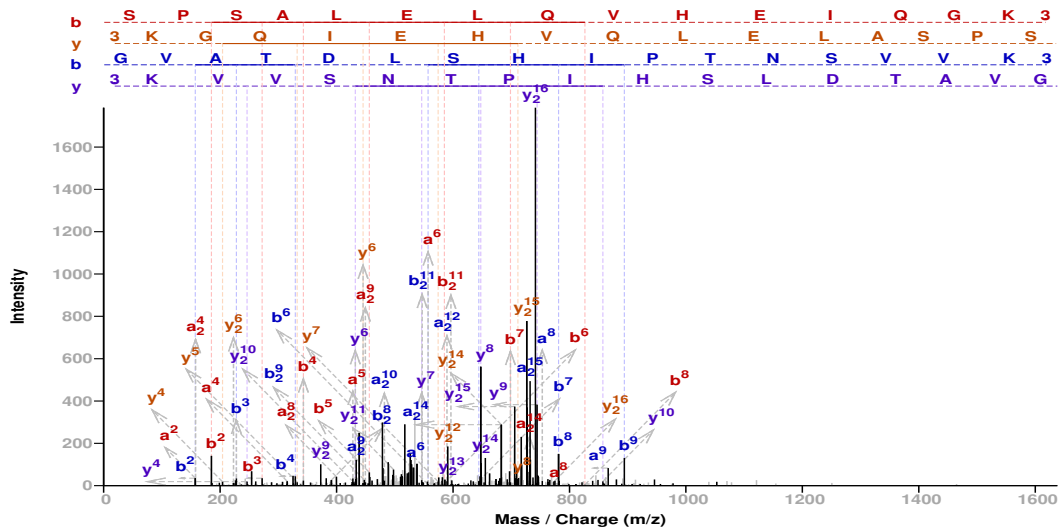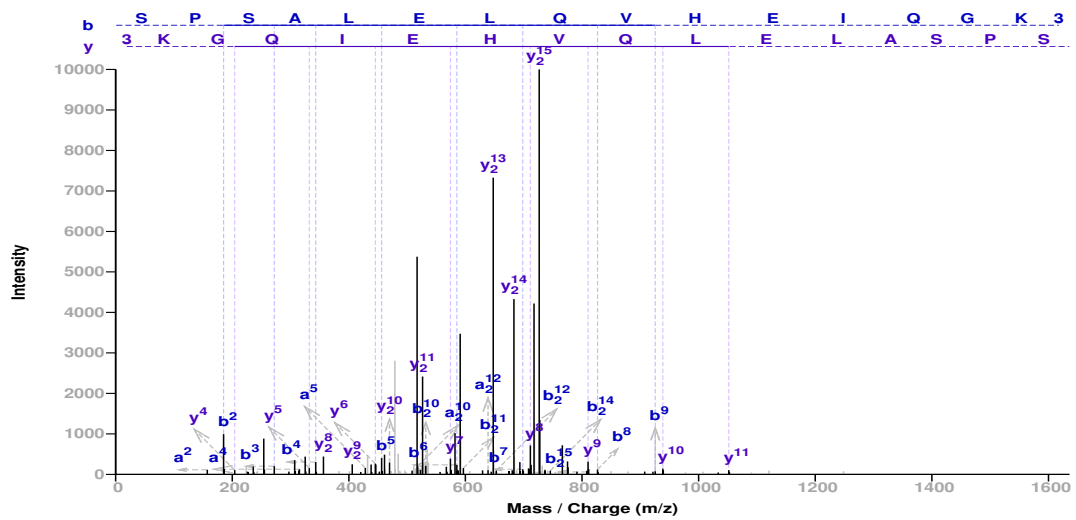

yeast00\_Scan\_Number\_6780 Precursor m/z: 595.833 cosine: 0.792  $\alpha$ : 0.540

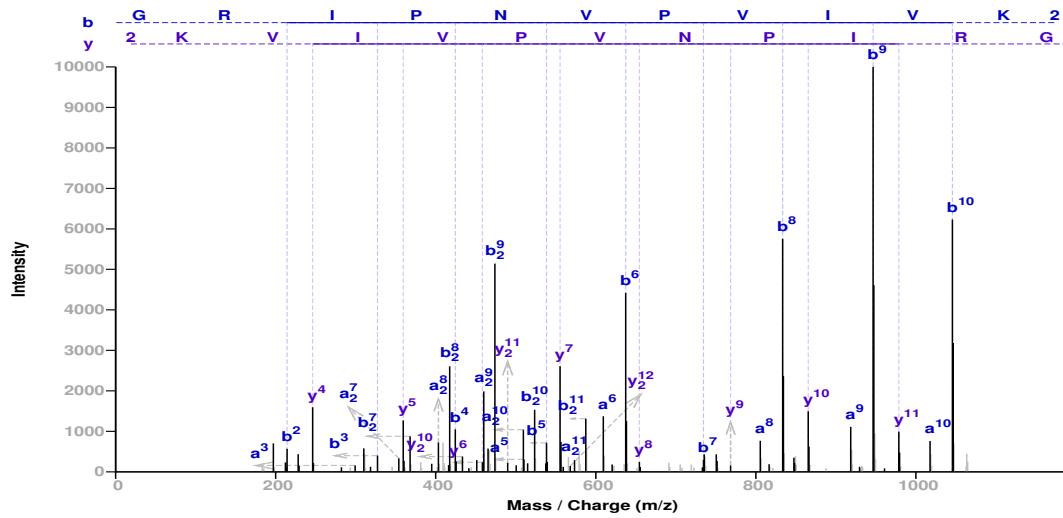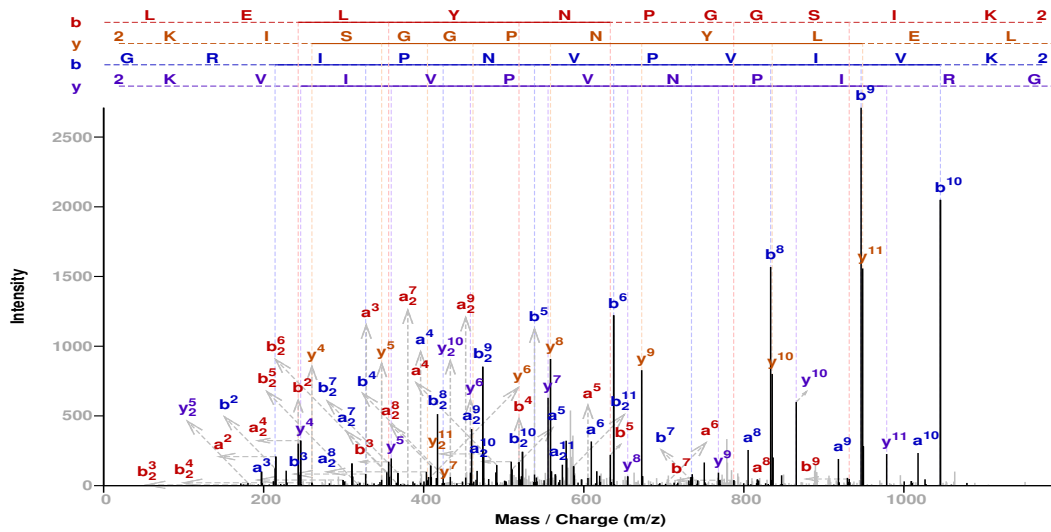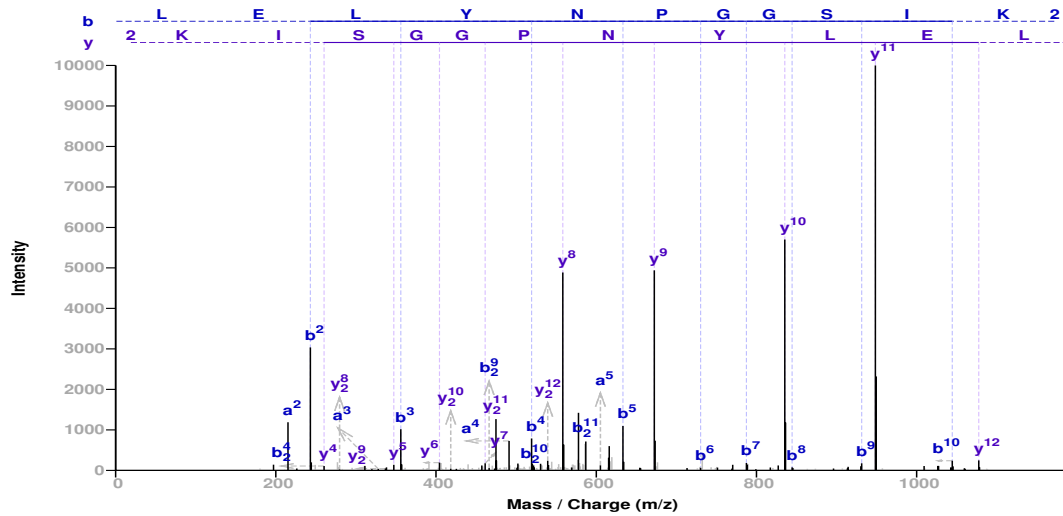

yeast00\_Scan\_Number\_5152 Precursor m/z: 453.281 cosine: 0.858  $\alpha$ : 0.533

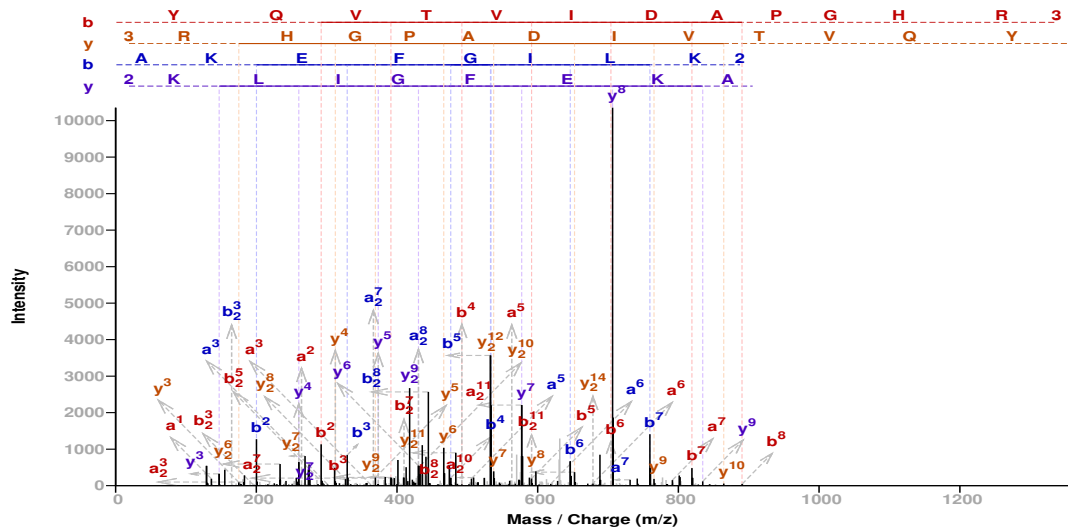



yeast00\_Scan\_Number\_4765 Precursor m/z: 468.749 cosine: 0.726  $\alpha$ : 0.521

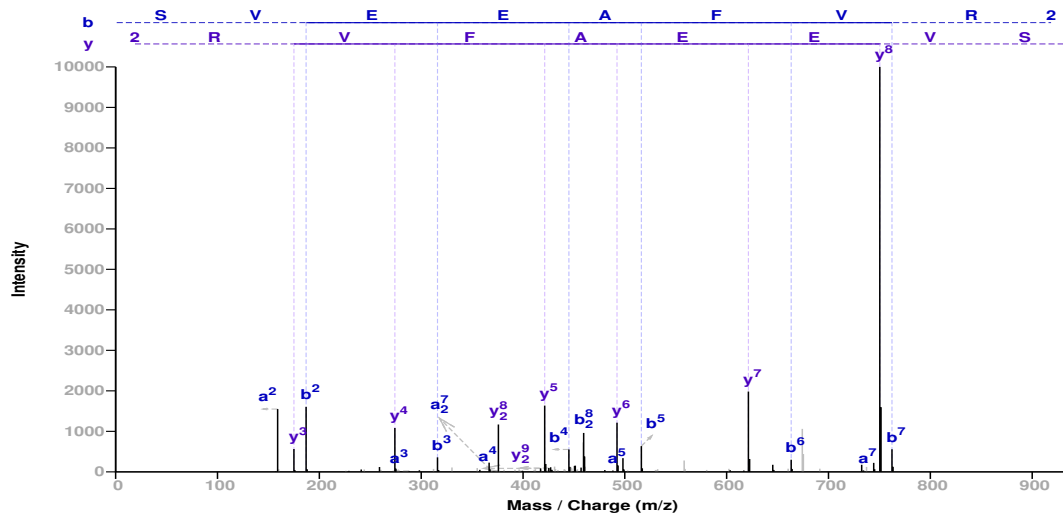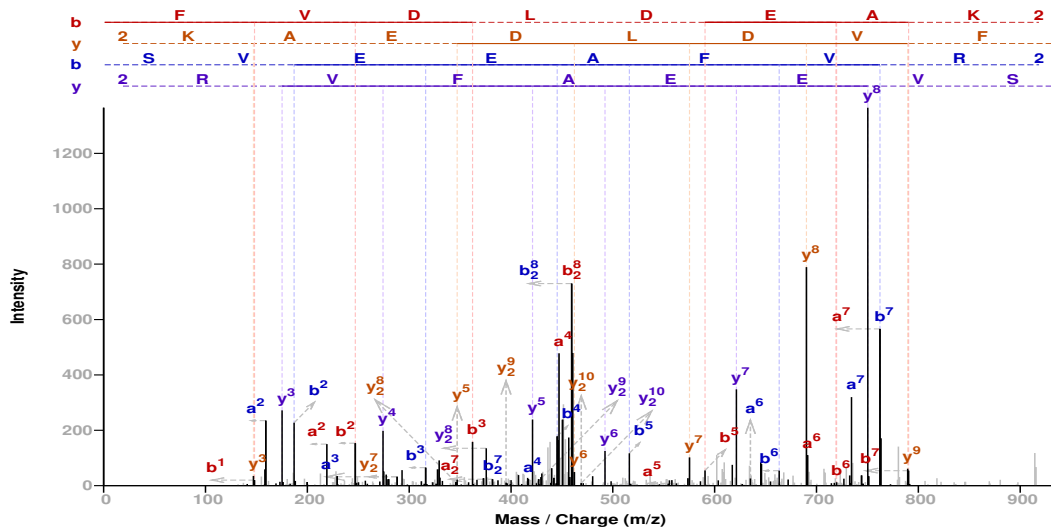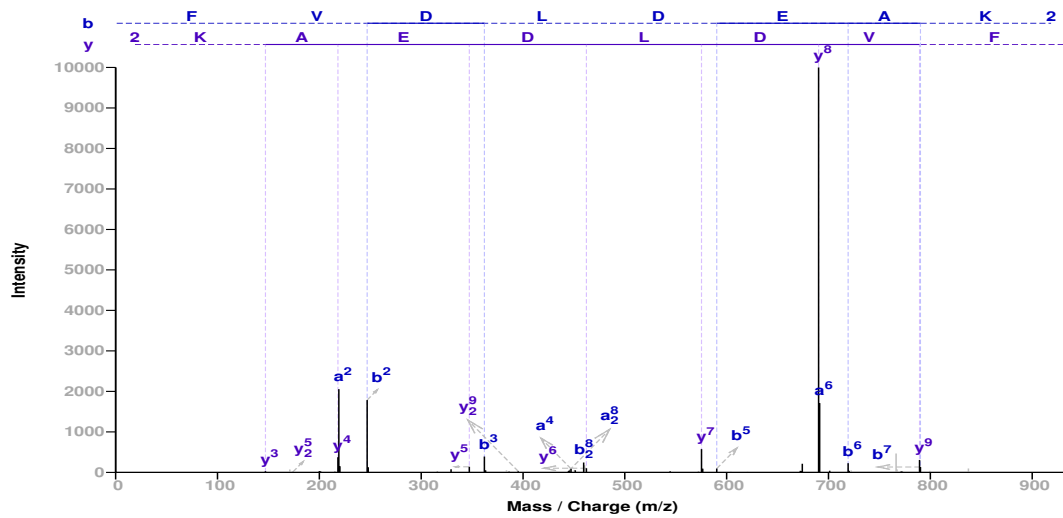

yeast00\_Scan\_Number\_4632 Precursor m/z: 408.238 cosine: 0.821  $\alpha$ : 0.506

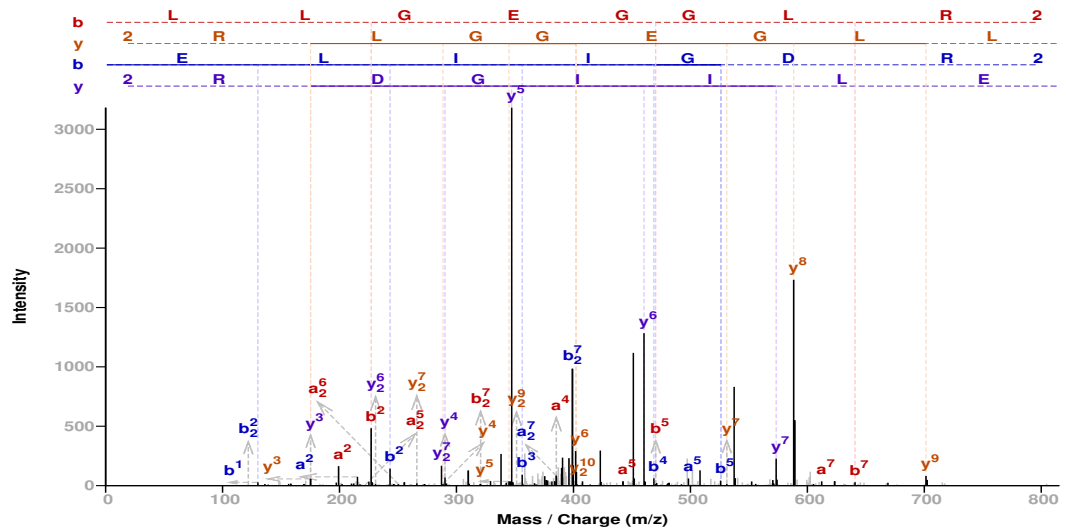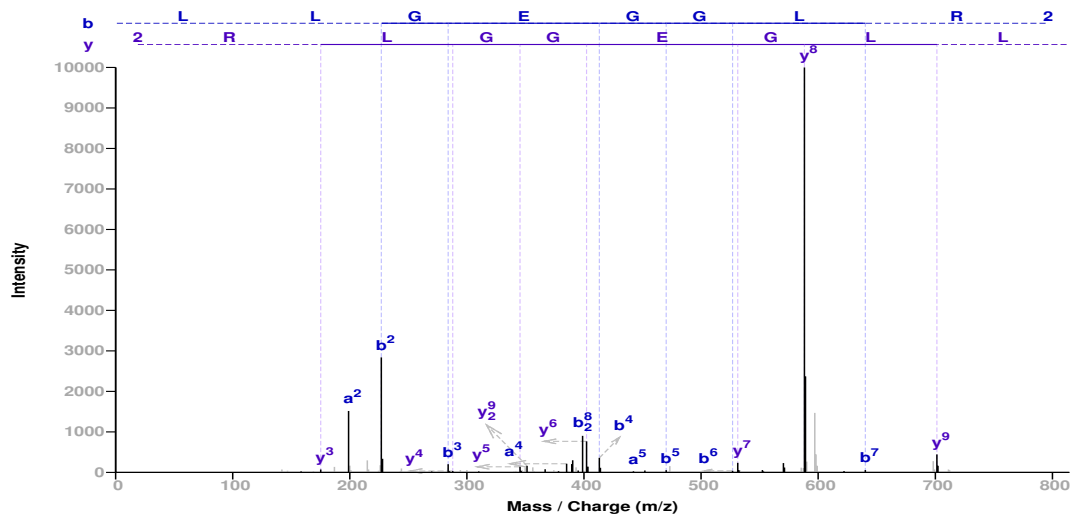



yeast00\_Scan\_Number\_4250 Precursor m/z: 455.255 cosine: 0.824  $\alpha$ : 0.503

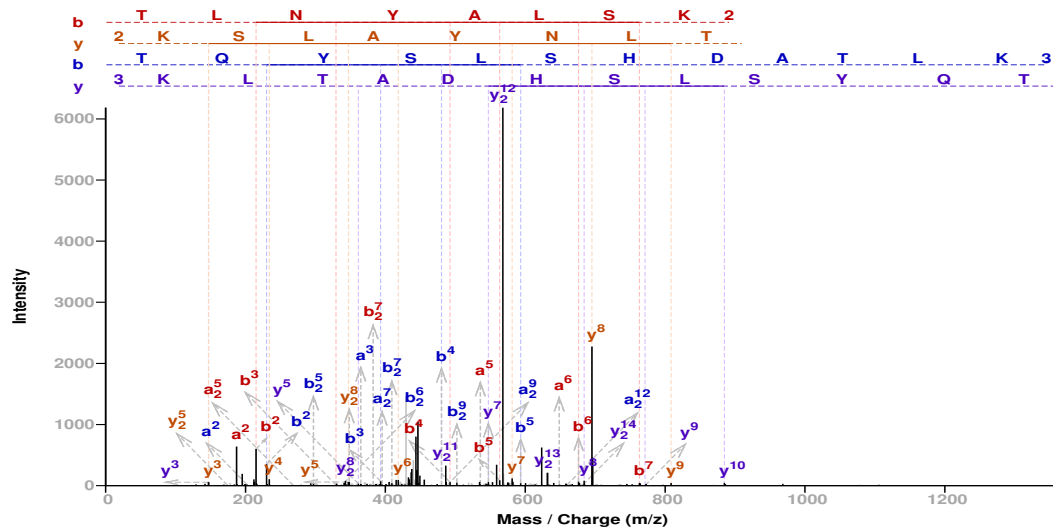

yeast00\_Scan\_Number\_8403 Precursor m/z: 661.848 cosine: 0.724  $\alpha$ : 0.502

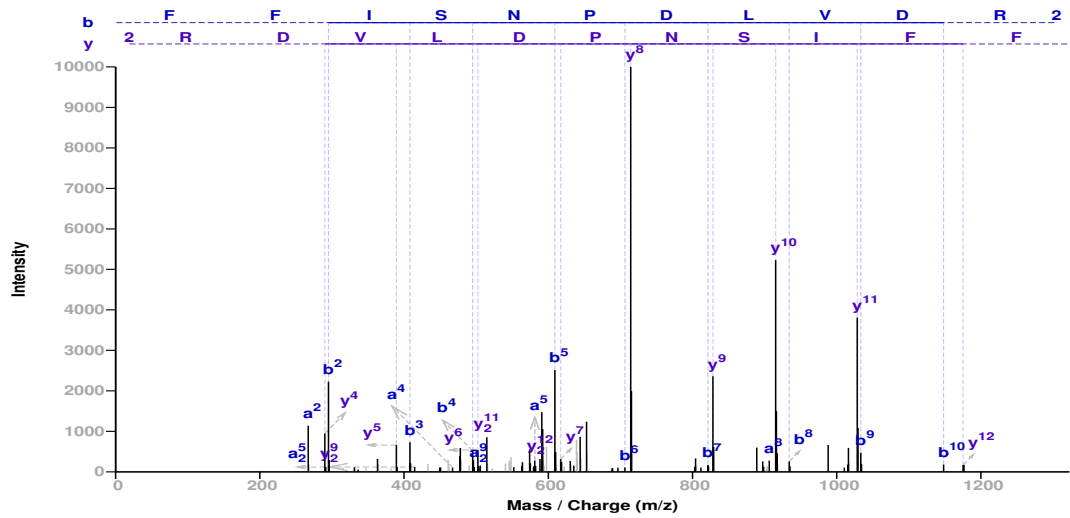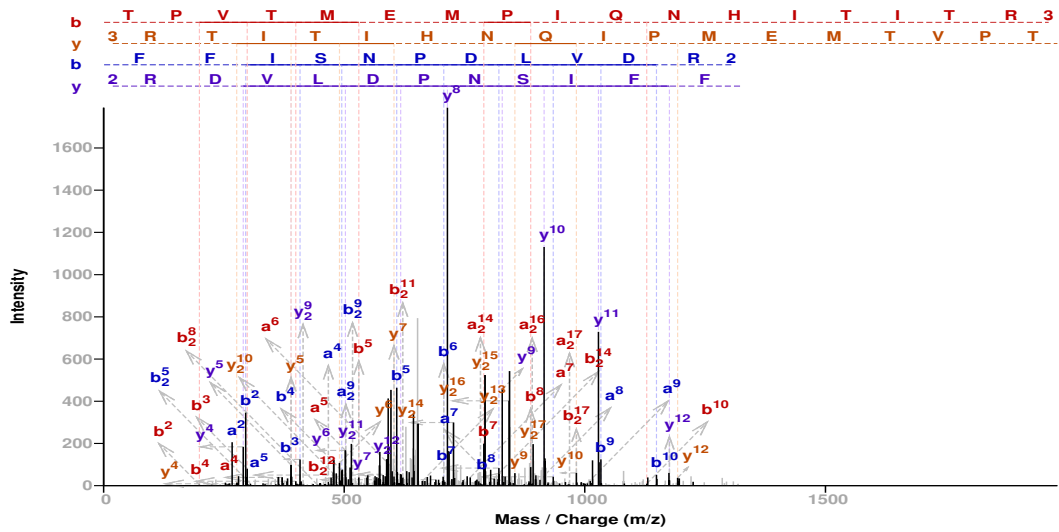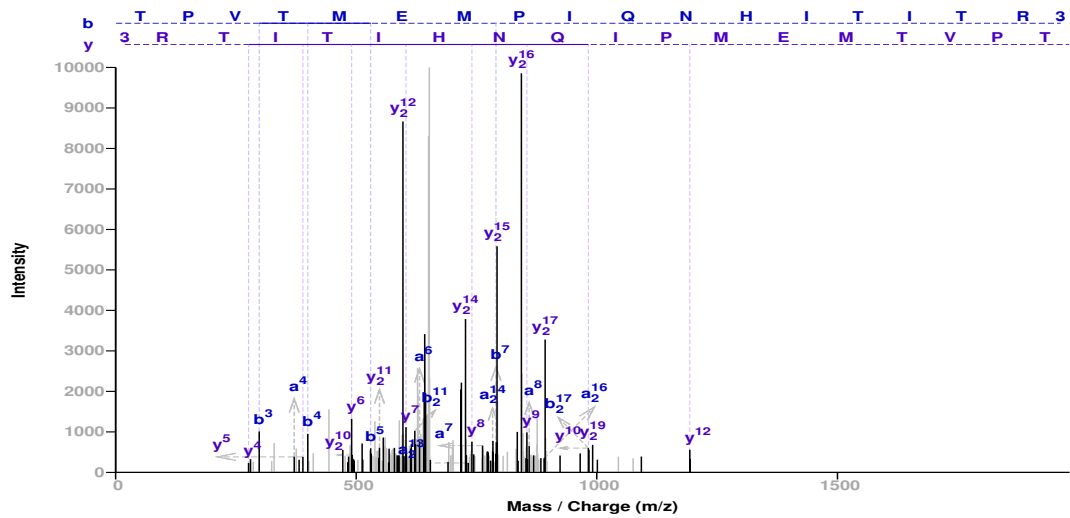

yeast00\_Scan\_Number\_650 Precursor m/z: 520.266 cosine: 0.799  $\alpha$ : 0.498

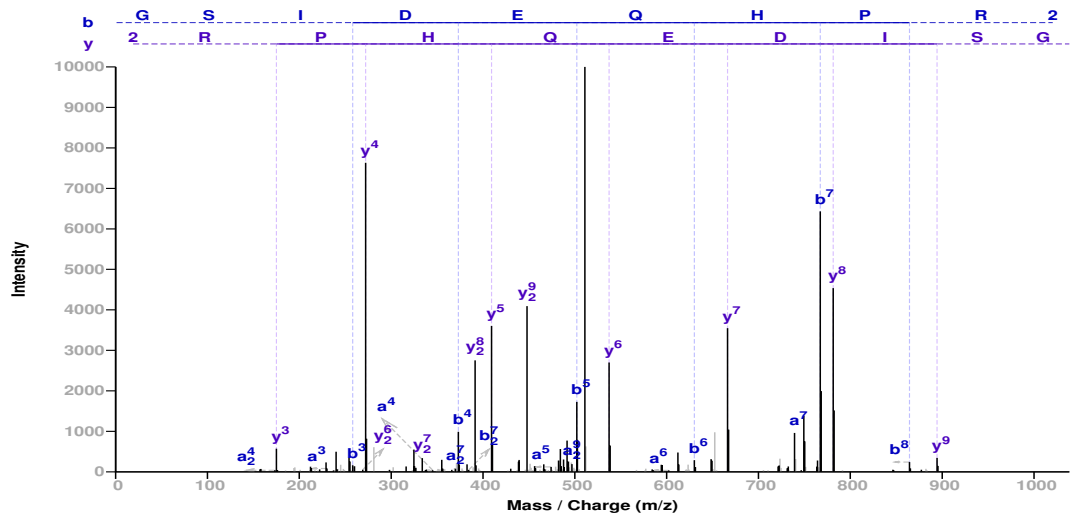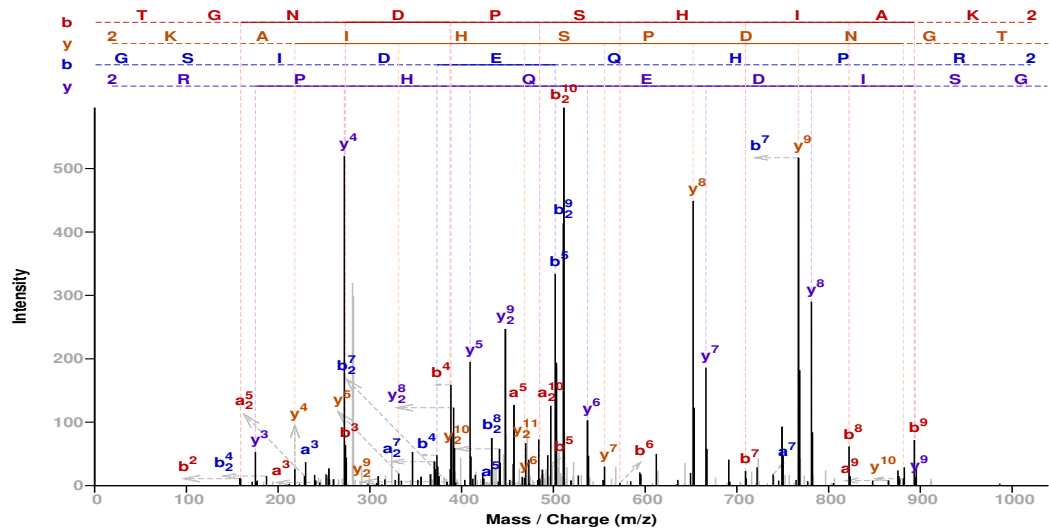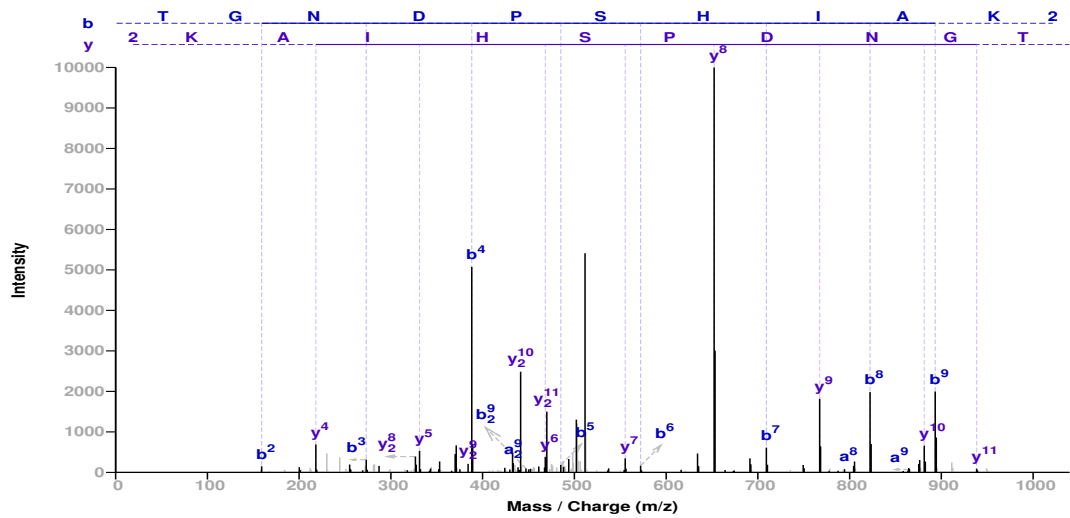

yeast00\_Scan\_Number\_7808 Precursor m/z: 435.233 cosine: 0.777  $\alpha$ : 0.492

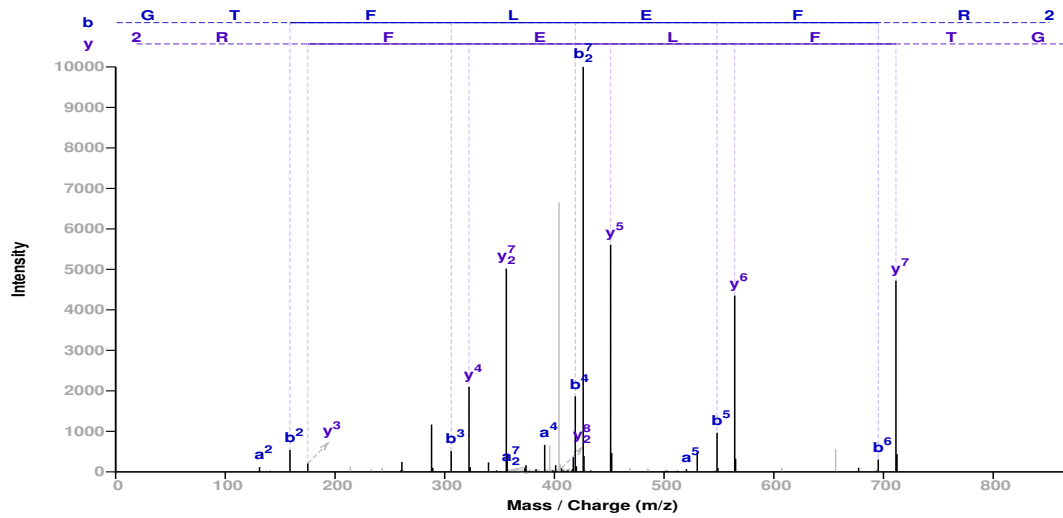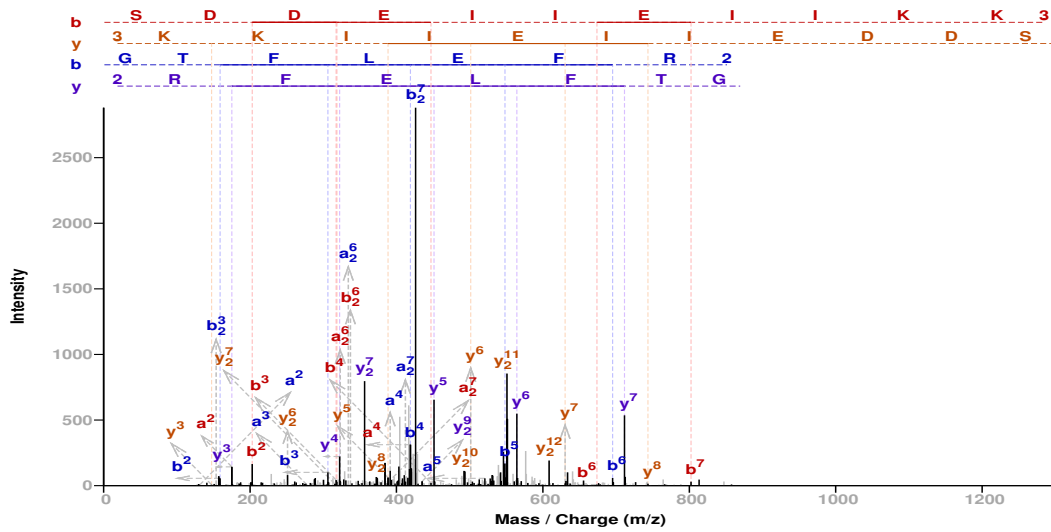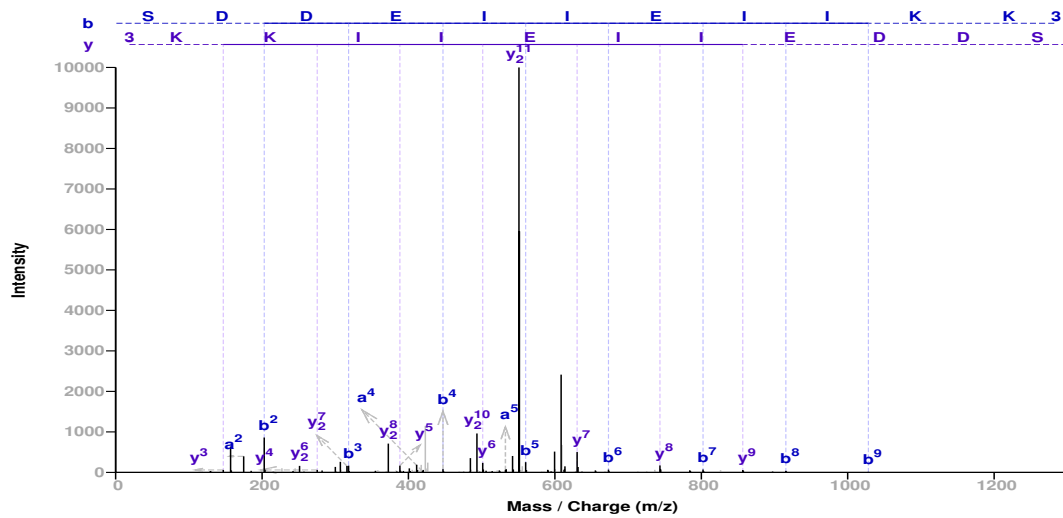

yeast00\_Scan\_Number\_4619 Precursor m/z: 381.233 cosine: 0.773  $\alpha$ : 0.490

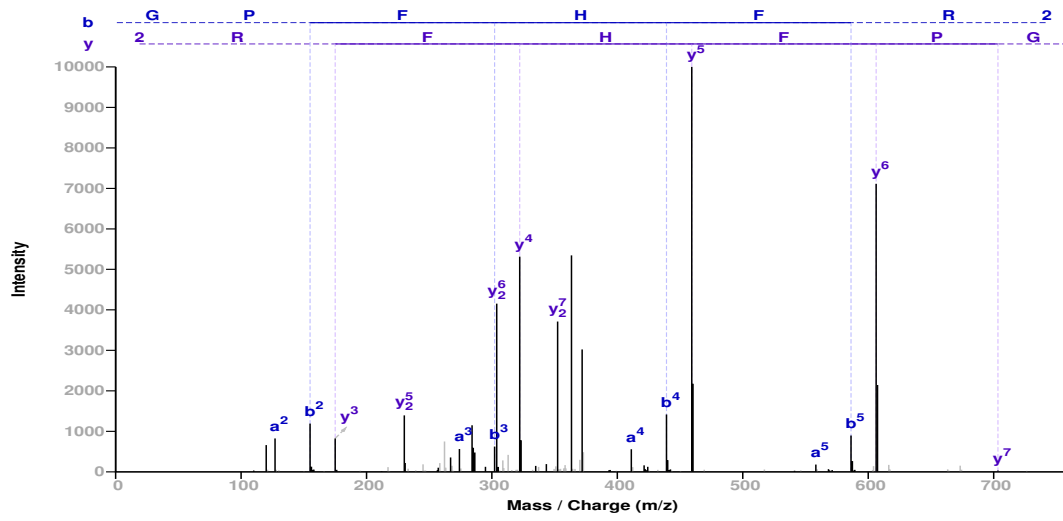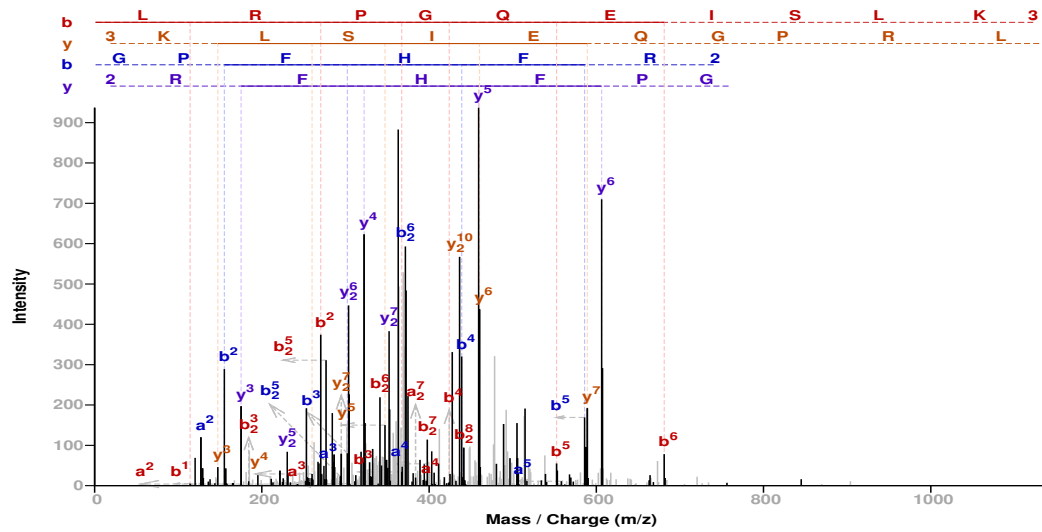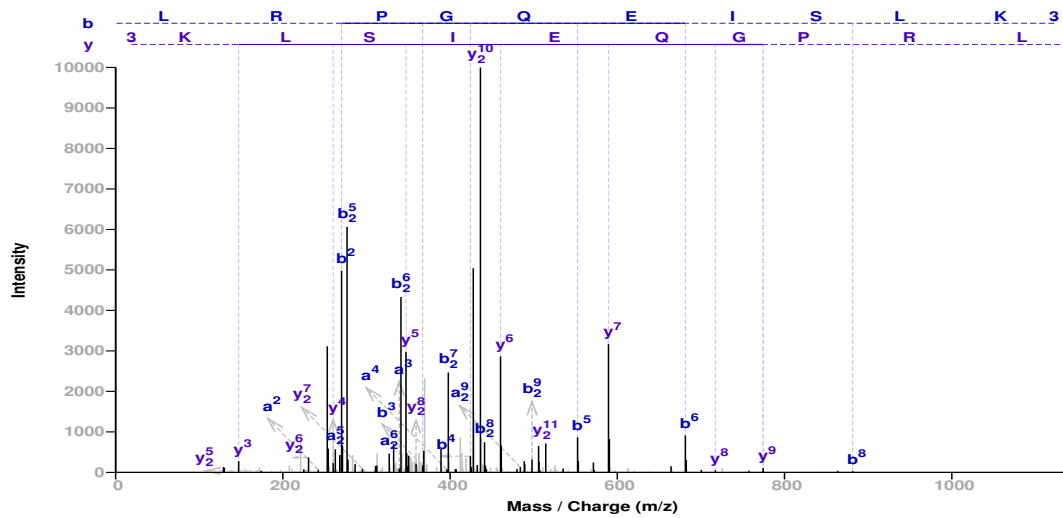

yeast00\_Scan\_Number\_7387 Precursor m/z: 909.914 cosine: 0.804  $\alpha$ : 0.490

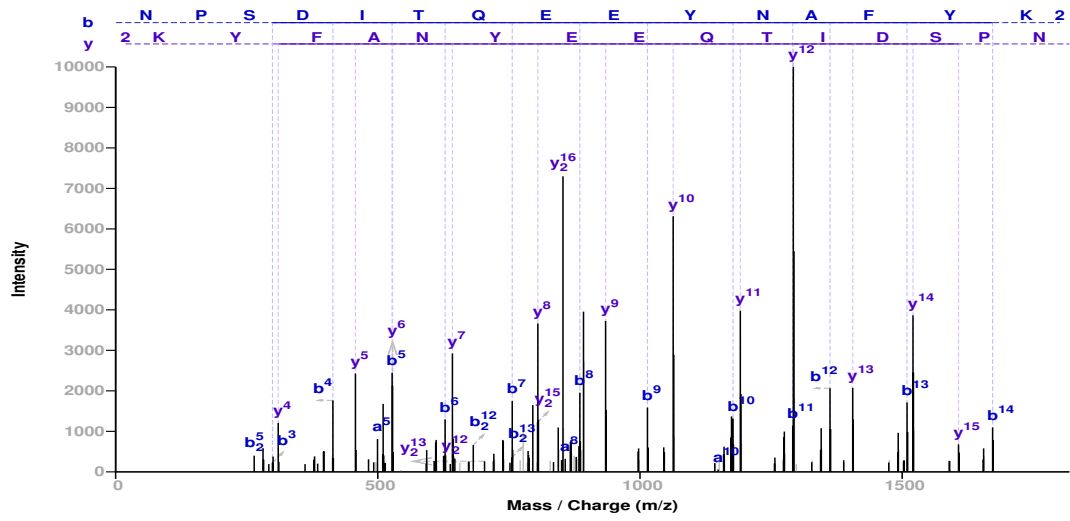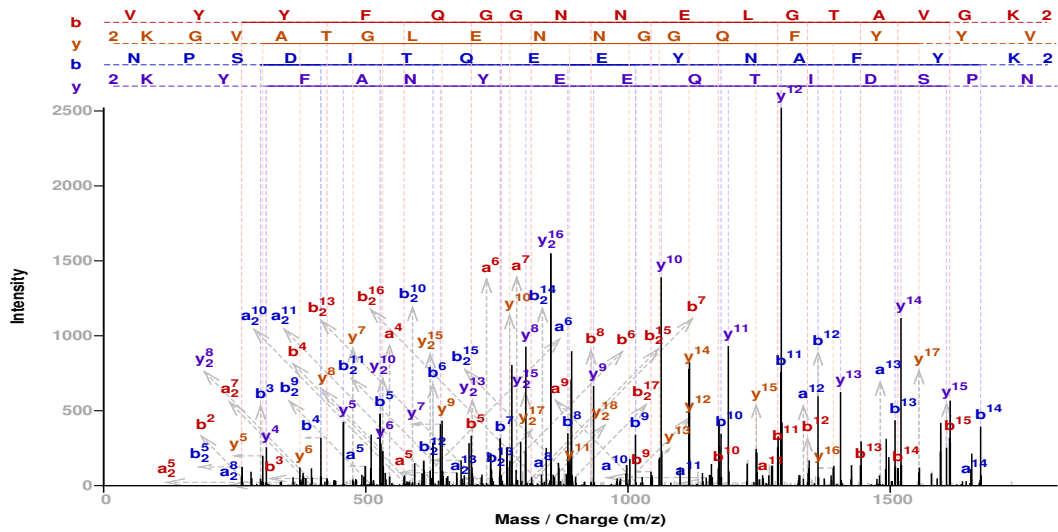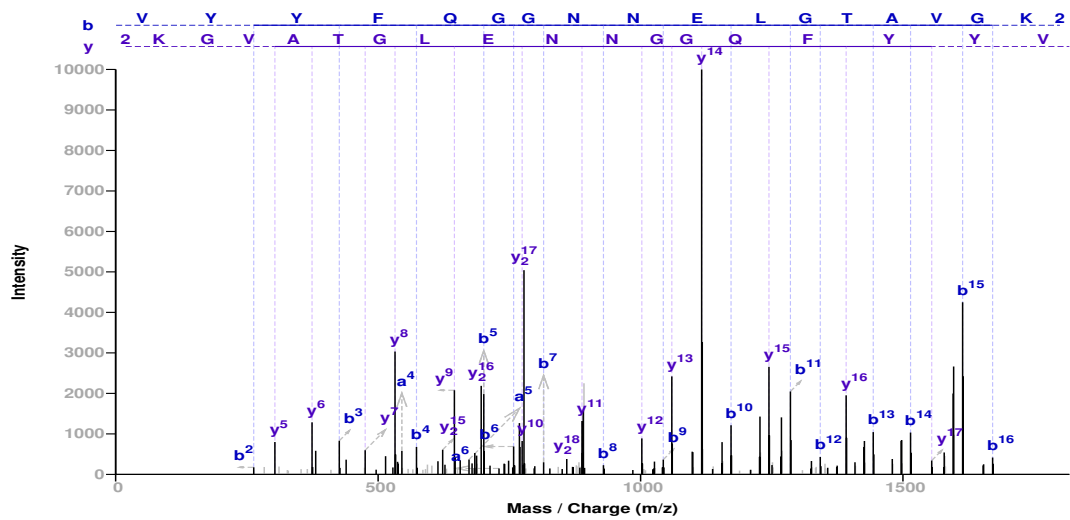



yeast00\_Scan\_Number\_3259 Precursor m/z: 408.755 cosine: 0.905  $\alpha$ : 0.485

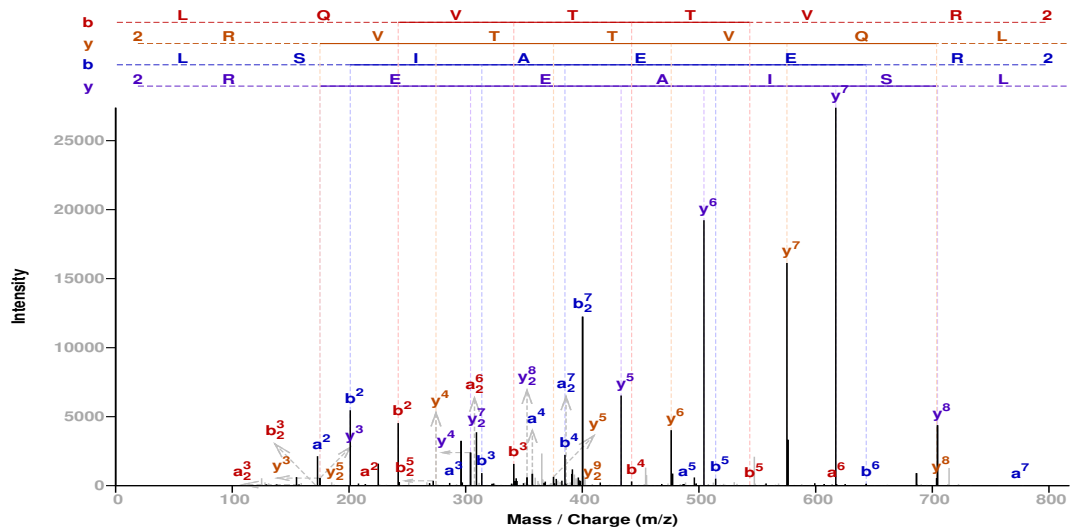



yeast00\_Scan\_Number\_938 Precursor m/z: 344.701 cosine: 0.867  $\alpha$ : 0.483

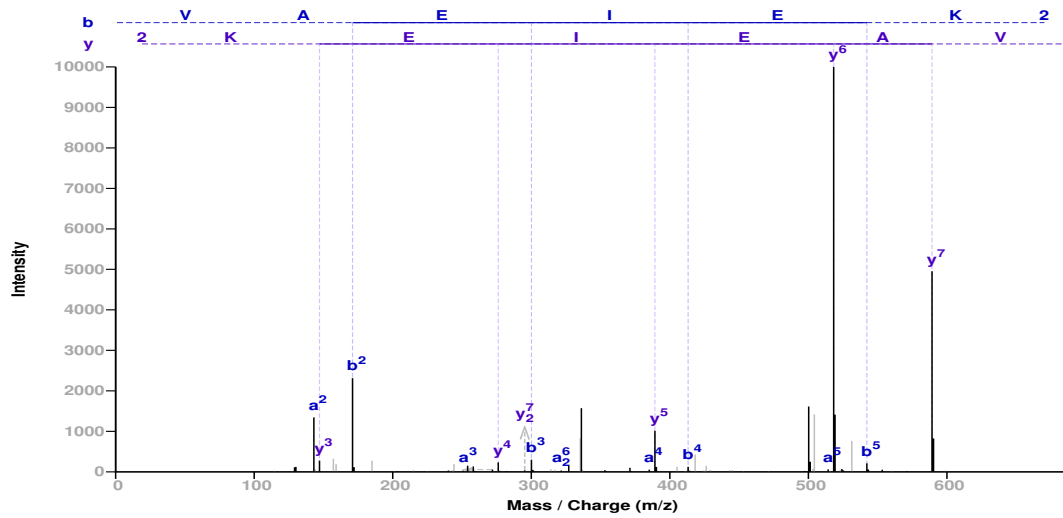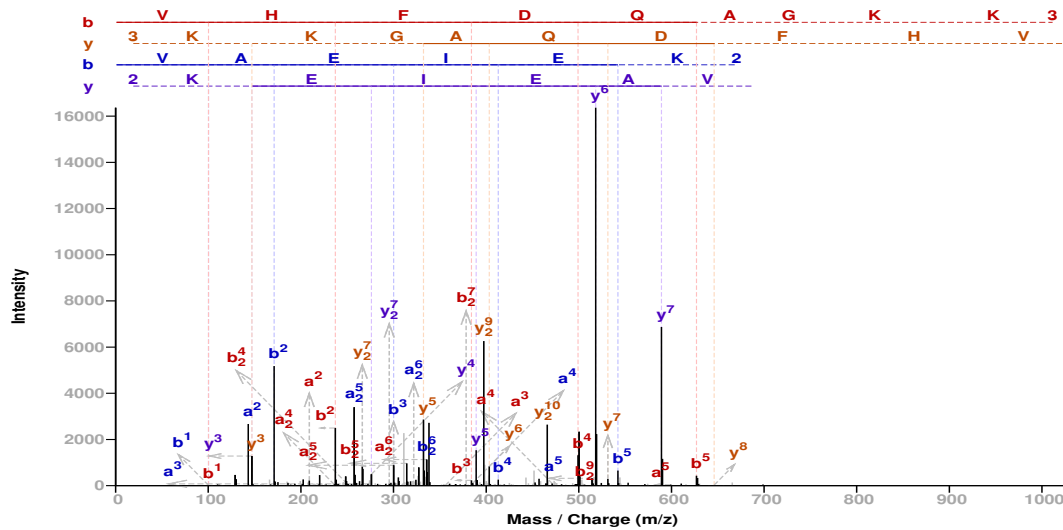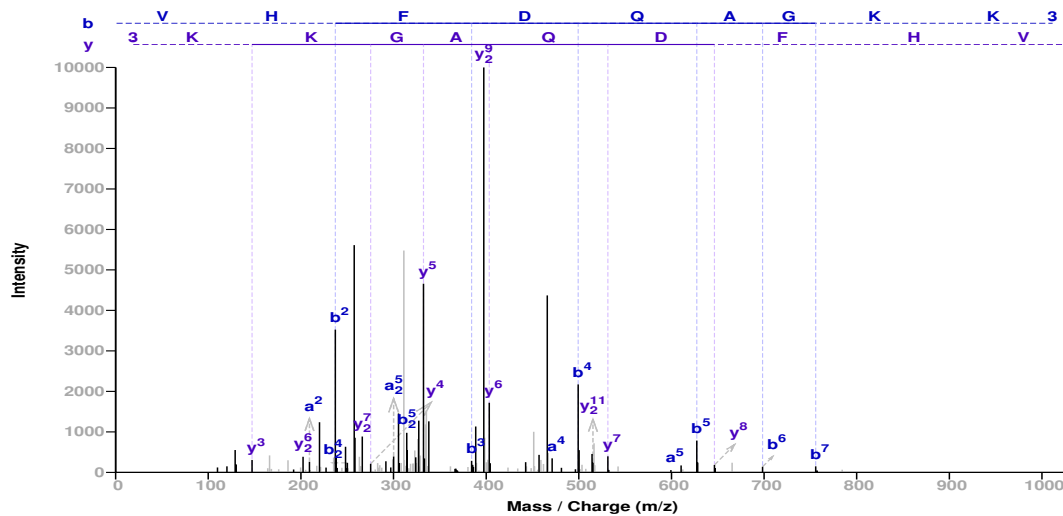

yeast00\_Scan\_Number\_7926 Precursor m/z: 665.331 cosine: 0.758  $\alpha$ : 0.482

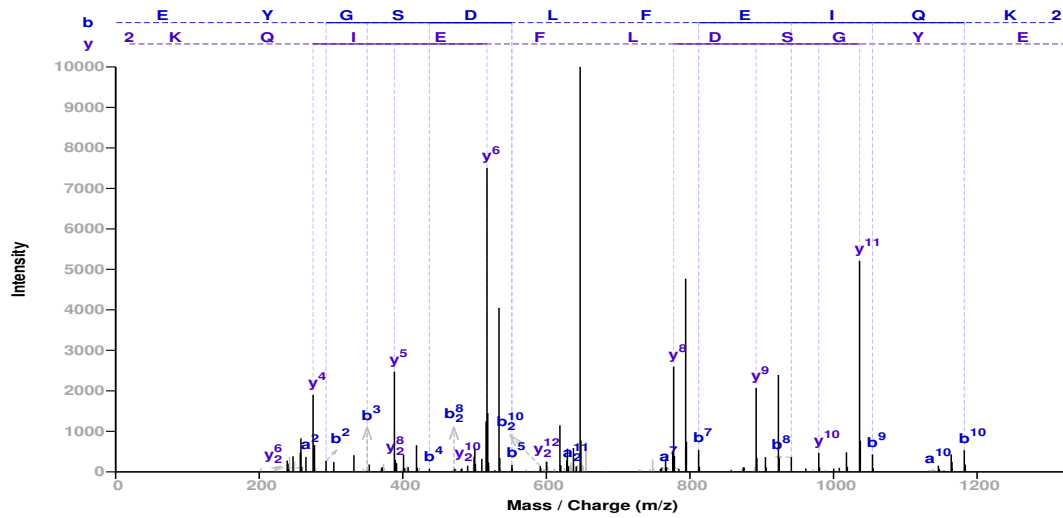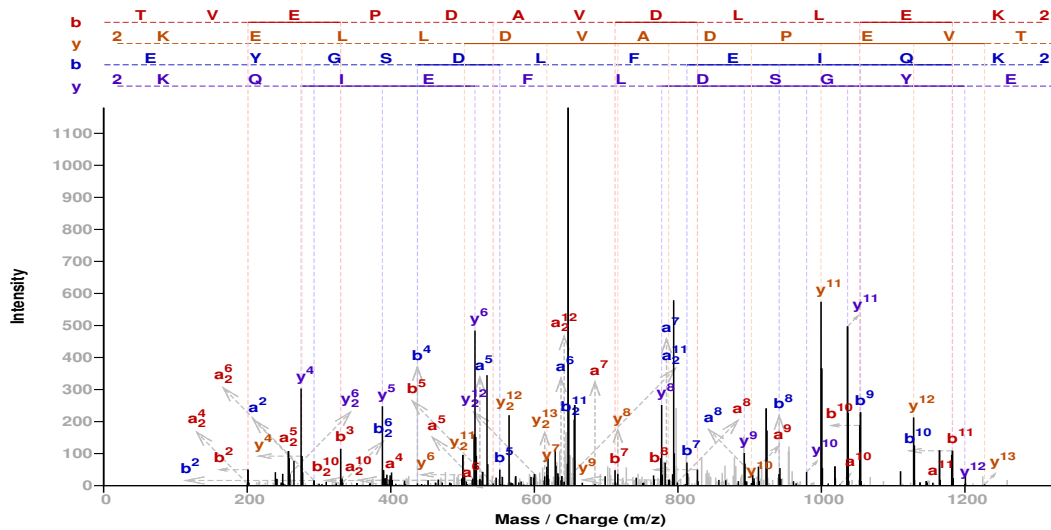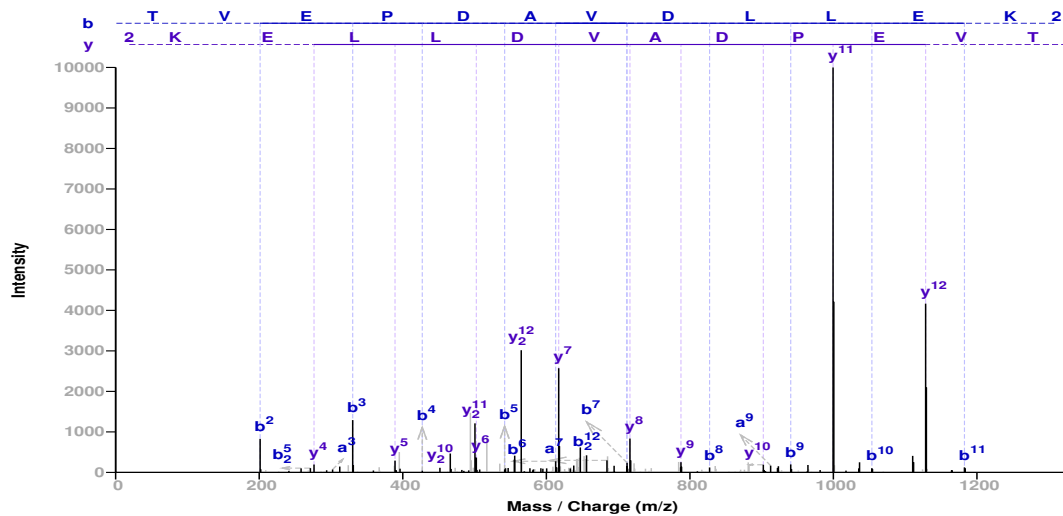

yeast00\_Scan\_Number\_7199 Precursor m/z: 730.877 cosine: 0.876  $\alpha$ : 0.479

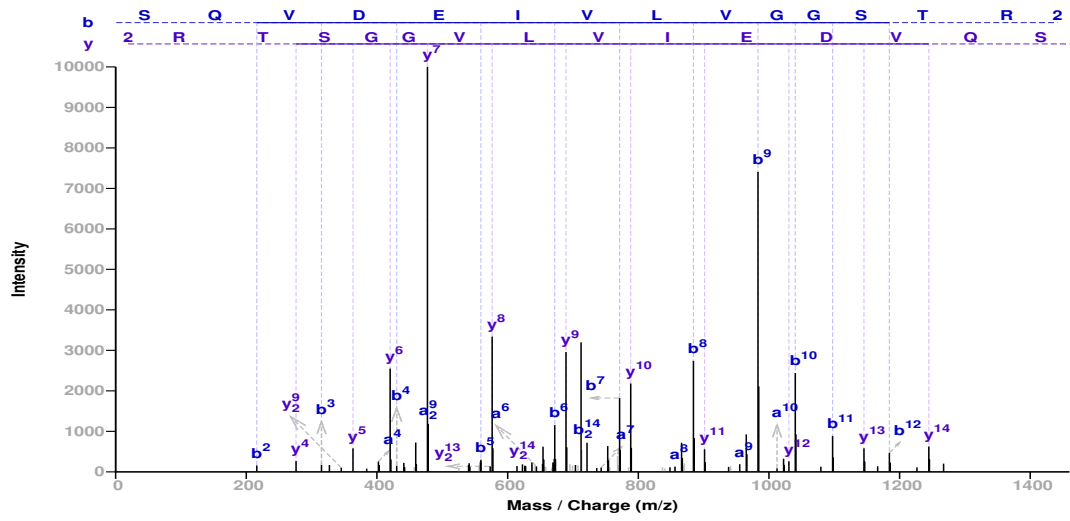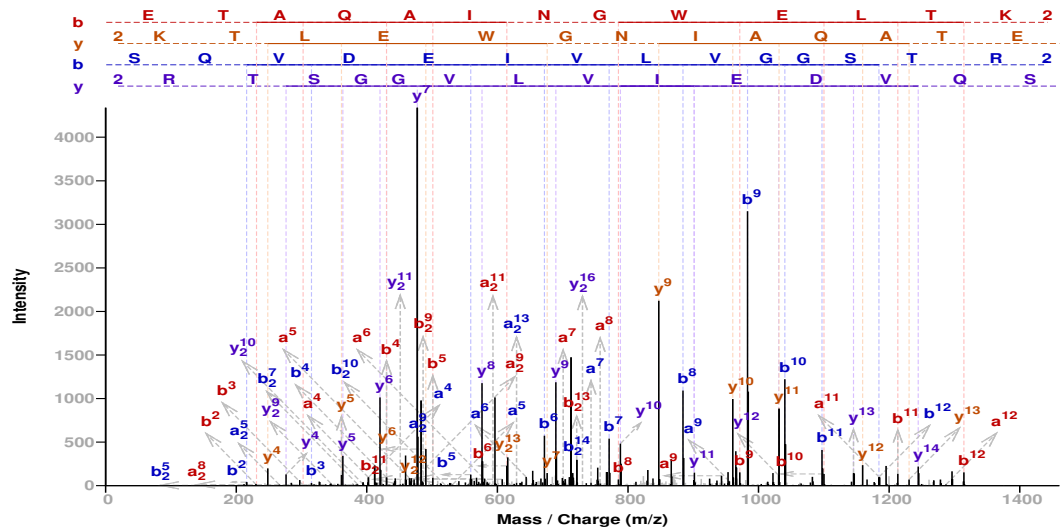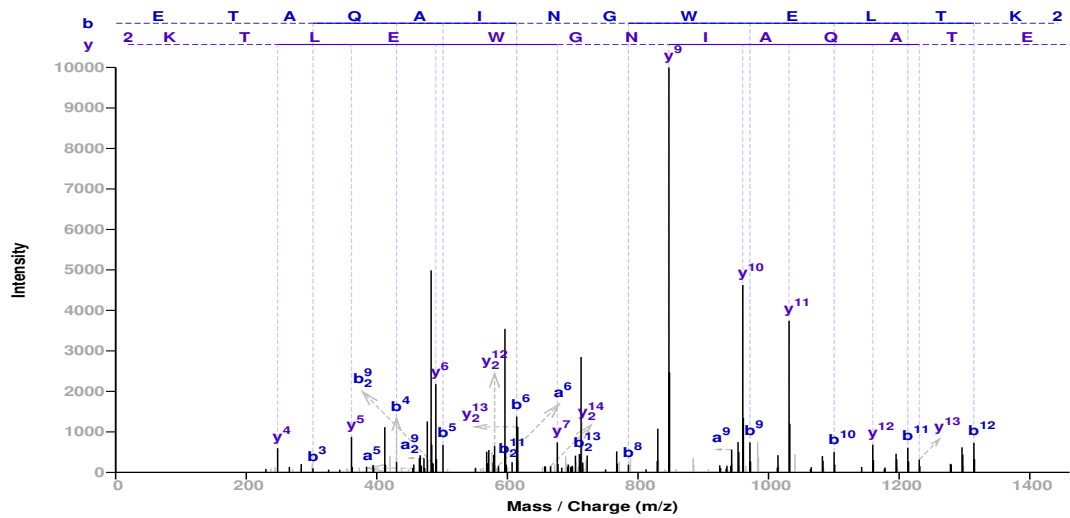

yeast00\_Scan\_Number\_6071 Precursor m/z: 394.241 cosine: 0.761  $\alpha$ : 0.472

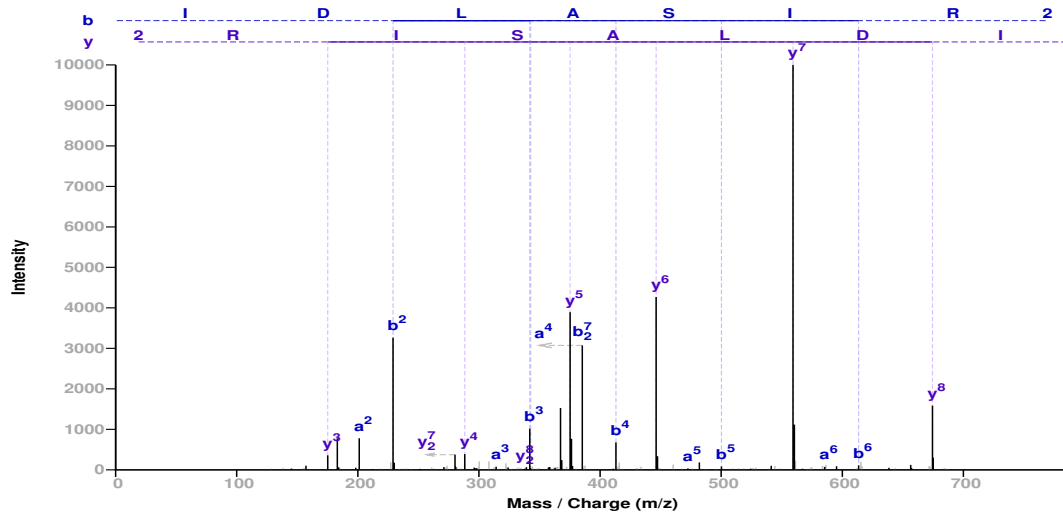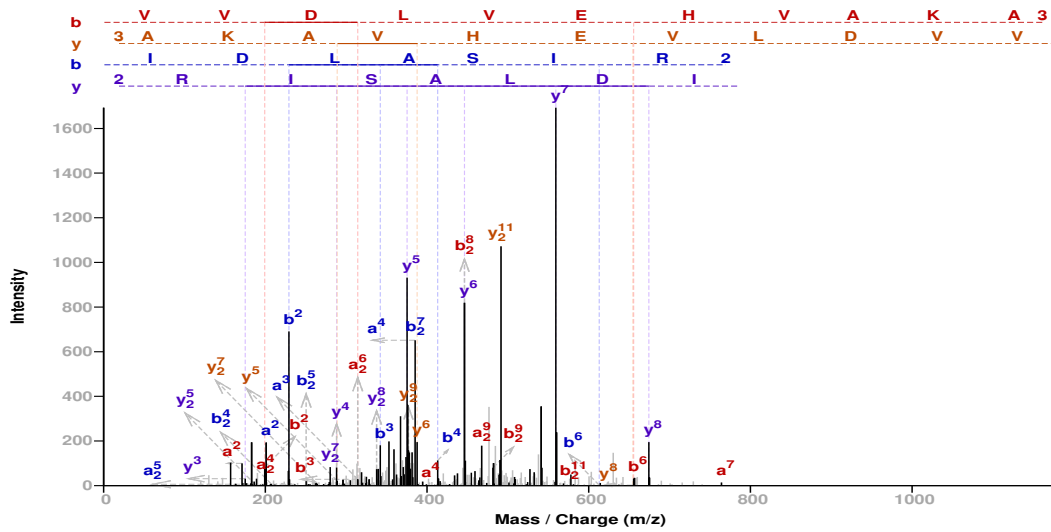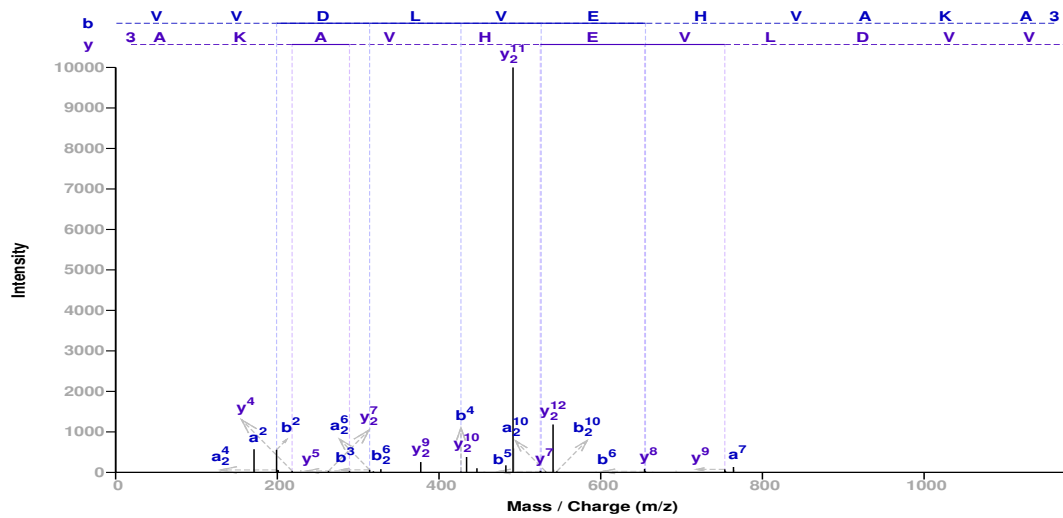

yeast00\_Scan\_Number\_3568 Precursor m/z: 437.257 cosine: 0.763  $\alpha$ : 0.469

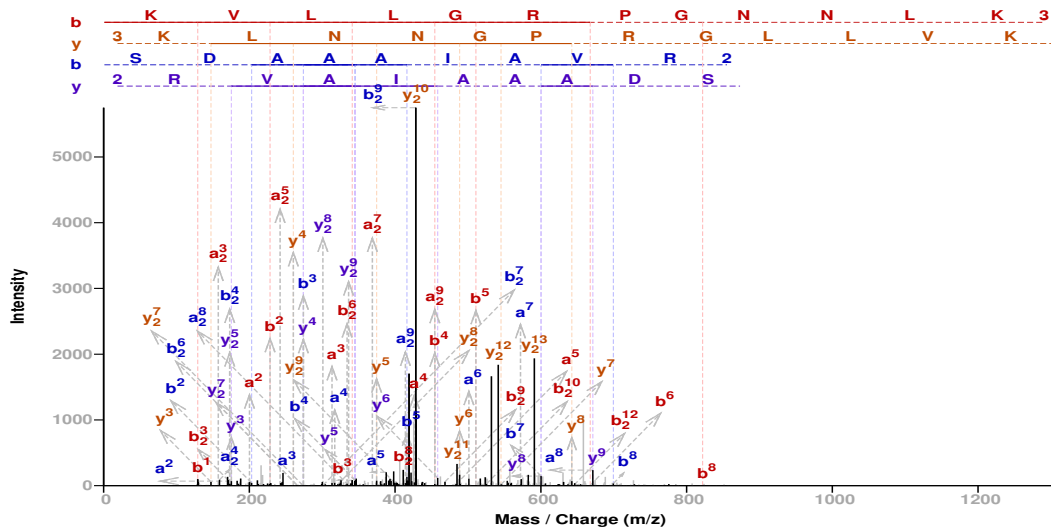

yeast00\_Scan\_Number\_4891 Precursor m/z: 444.764 cosine: 0.916  $\alpha$ : 0.468

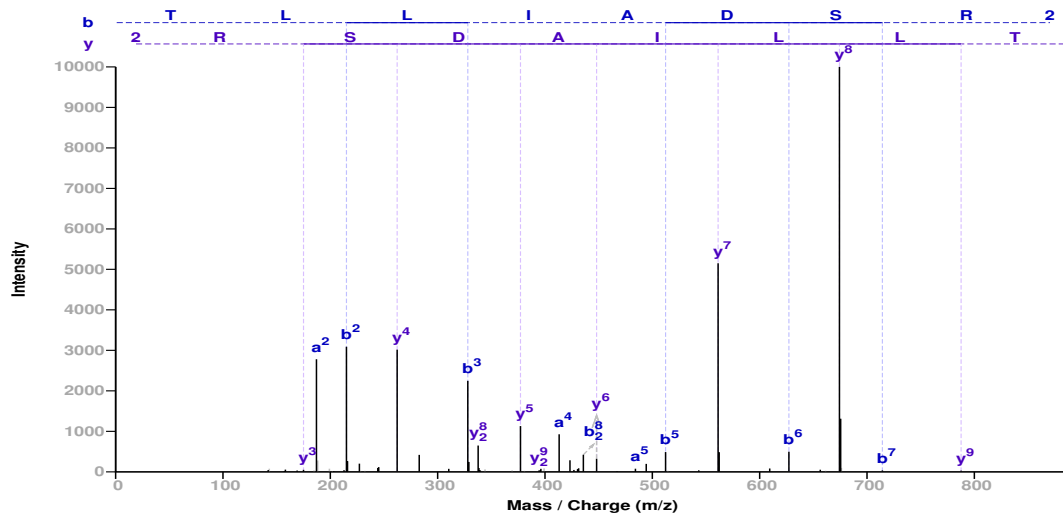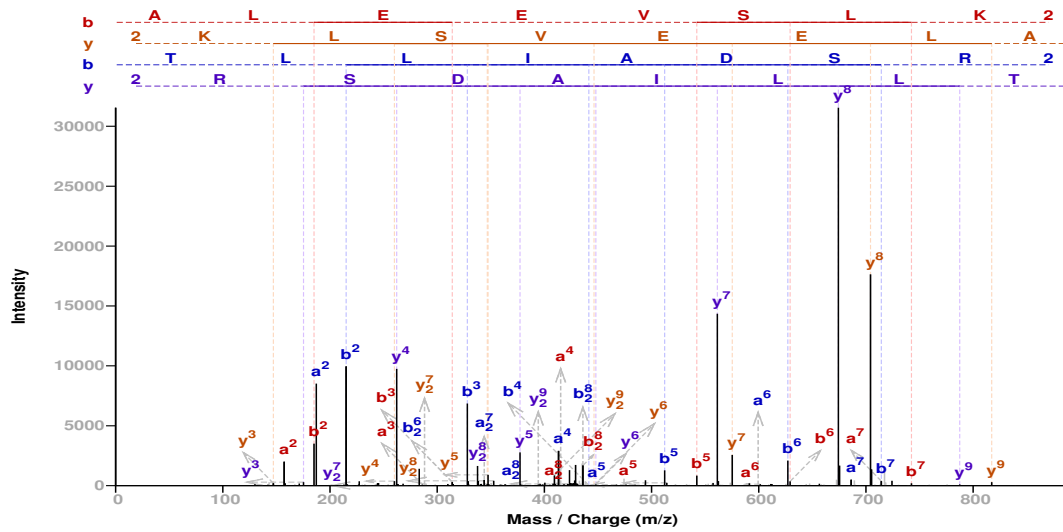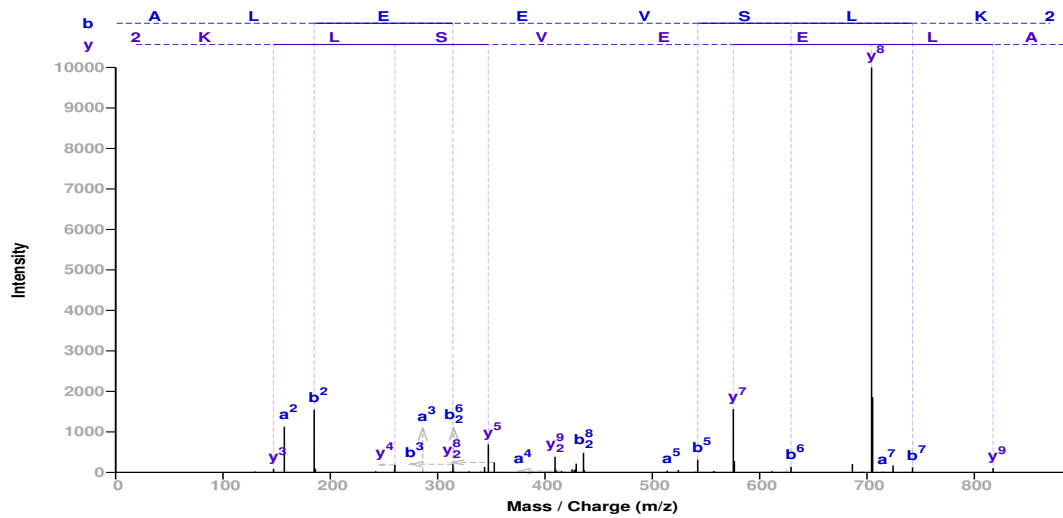

yeast00\_Scan\_Number\_8439 Precursor m/z: 650.362 cosine: 0.773  $\alpha$ : 0.464

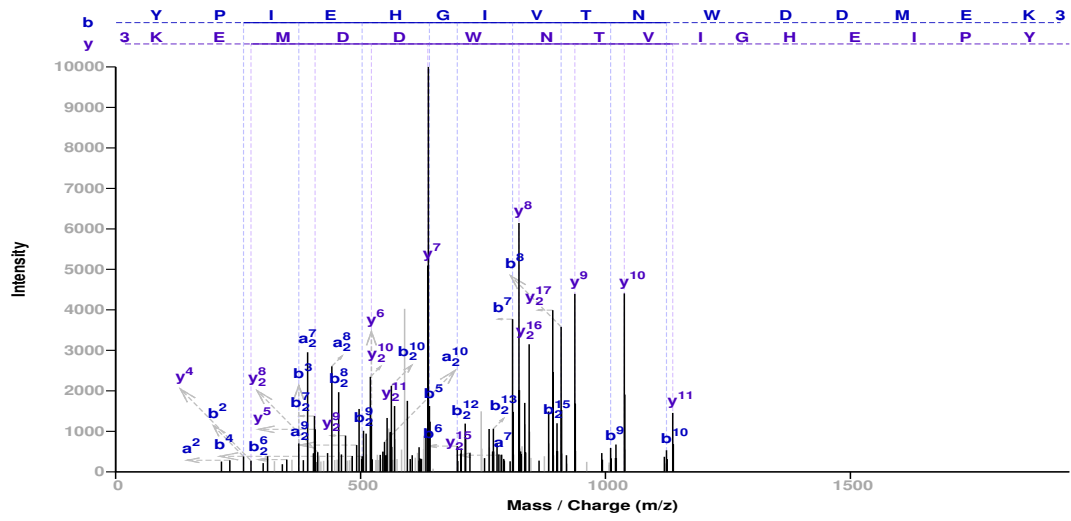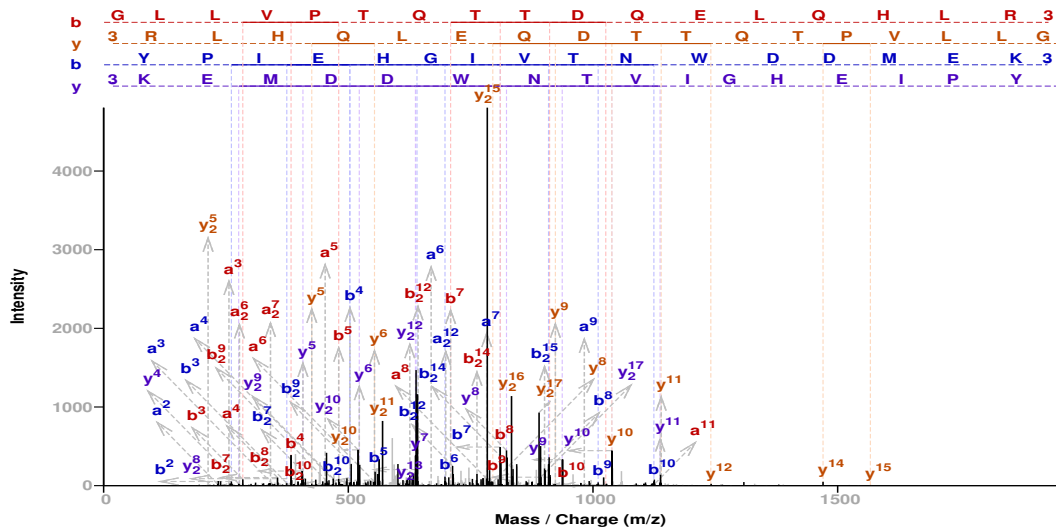

yeast00\_Scan\_Number\_5499 Precursor m/z: 431.722 cosine: 0.797  $\alpha$ : 0.463

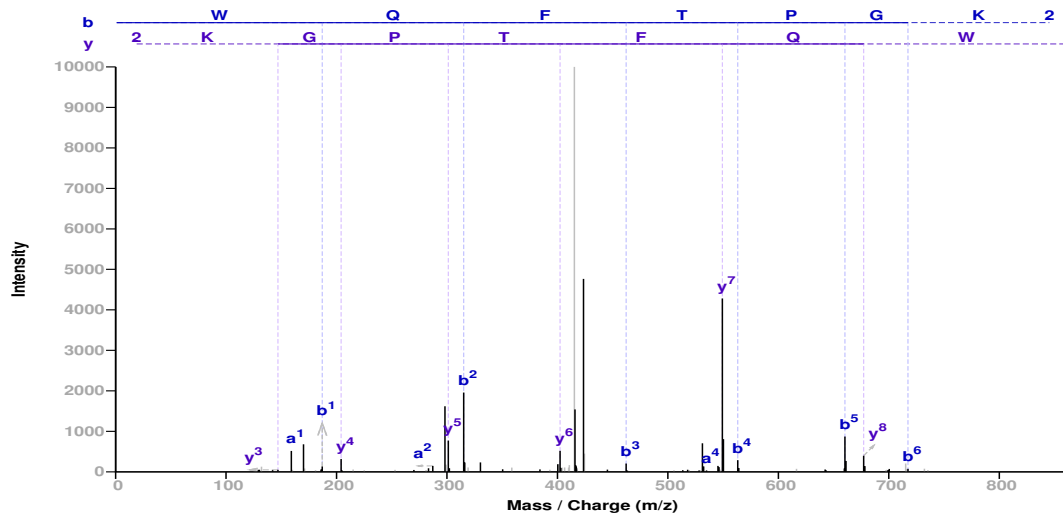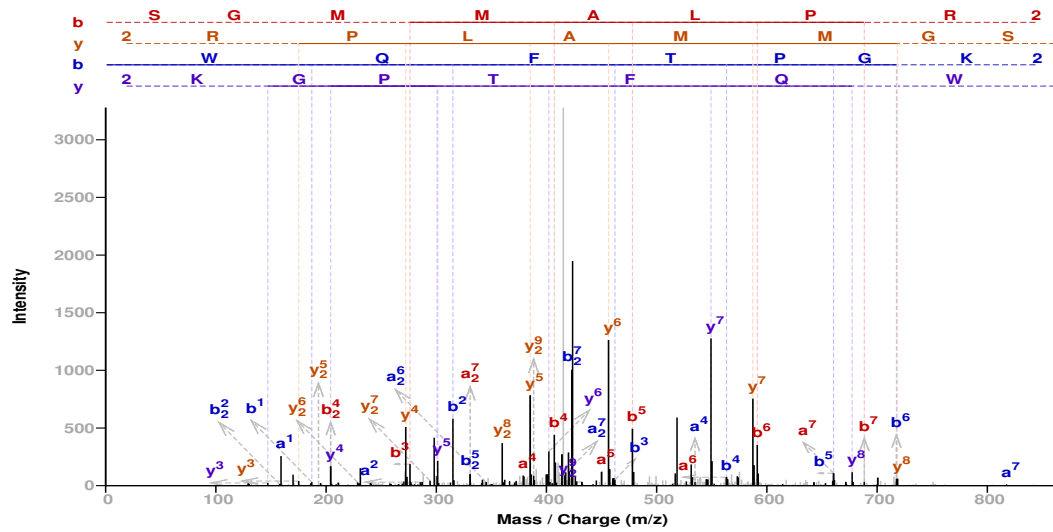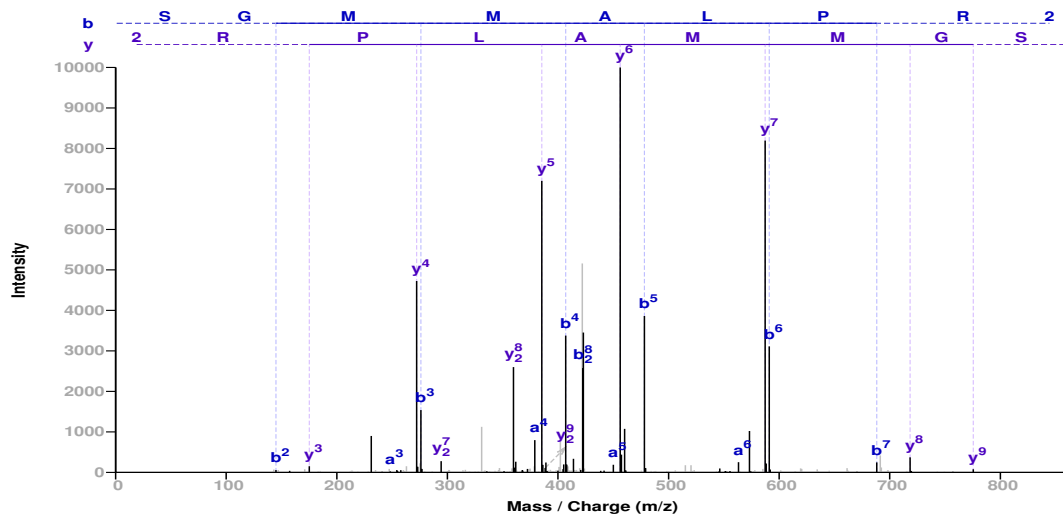



yeast00\_Scan\_Number\_6335 Precursor m/z: 582.311 cosine: 0.806  $\alpha$ : 0.460

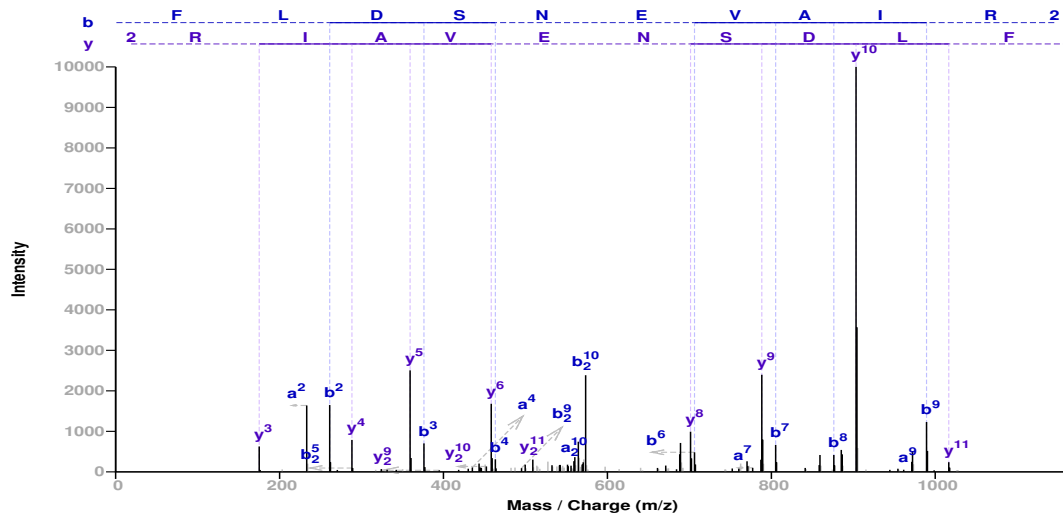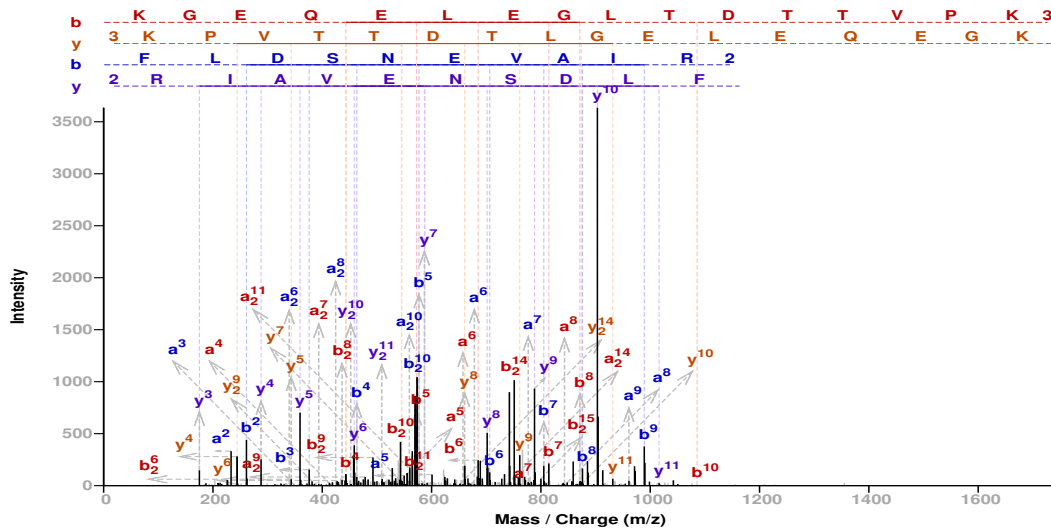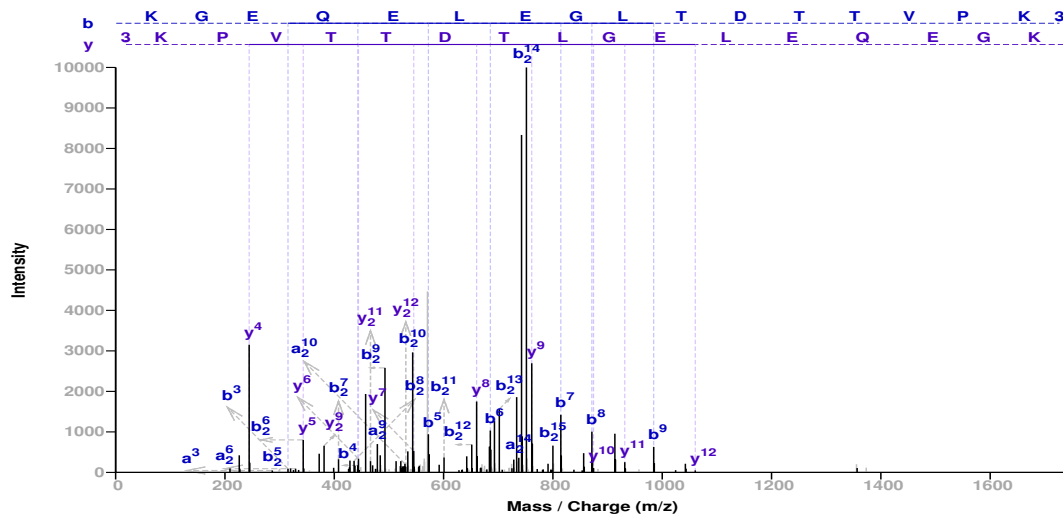

yeast00\_Scan\_Number\_7477 Precursor m/z: 594.956 cosine: 0.749  $\alpha$ : 0.458

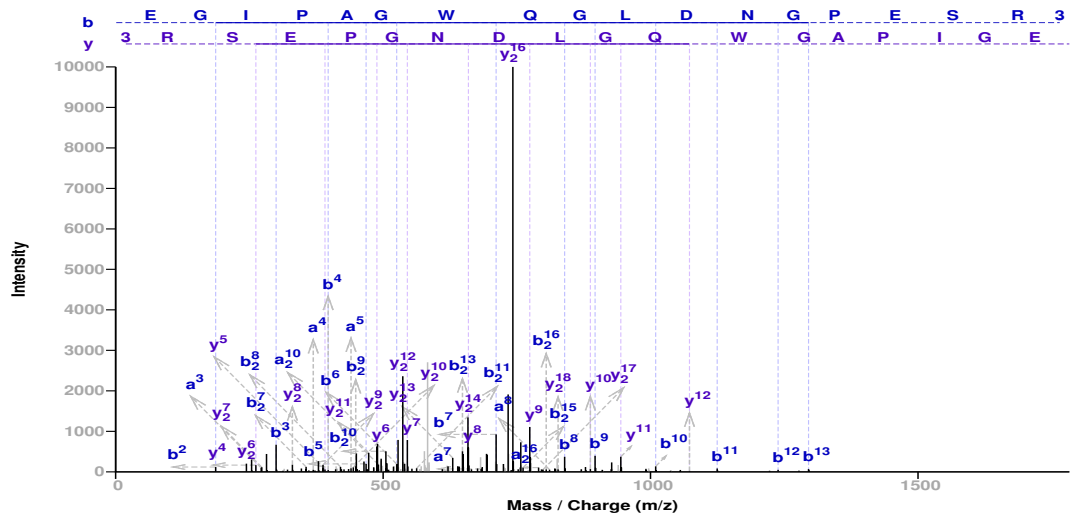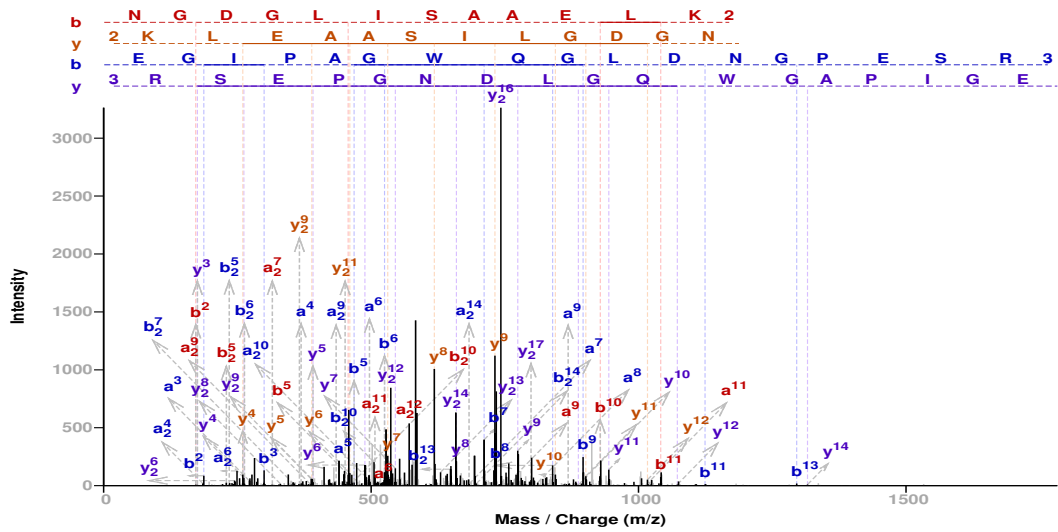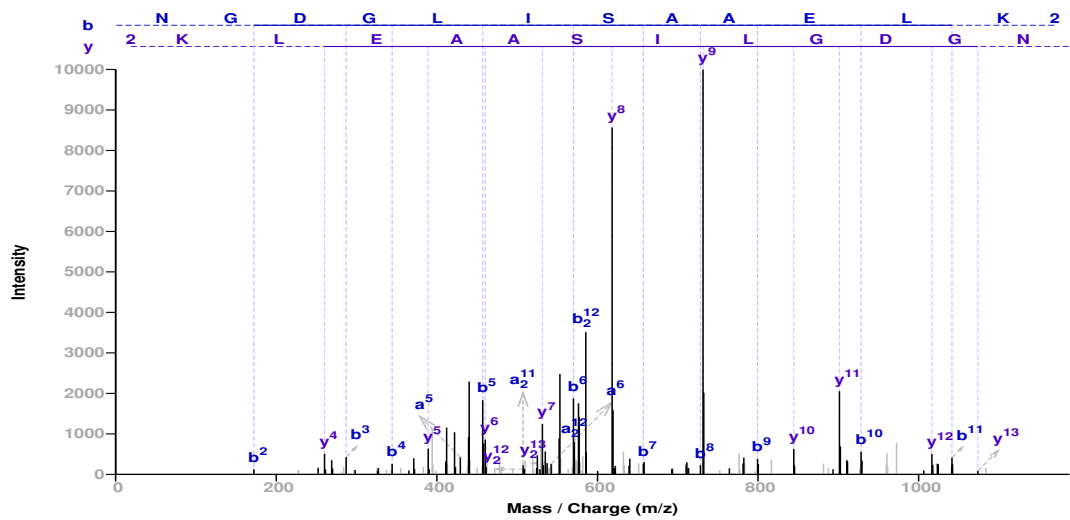



yeast00\_Scan\_Number\_6521 Precursor m/z: 616.582 cosine: 0.735  $\alpha$ : 0.451

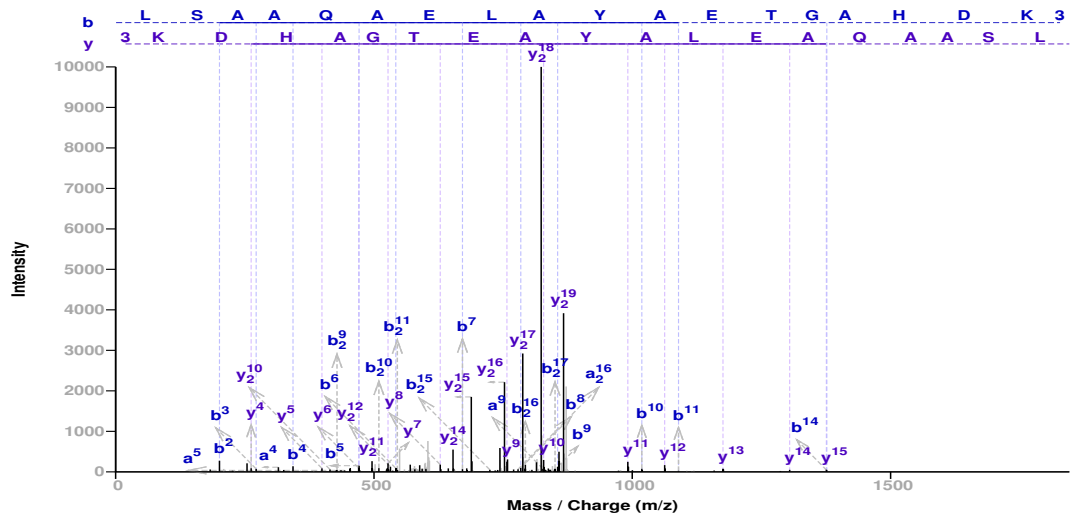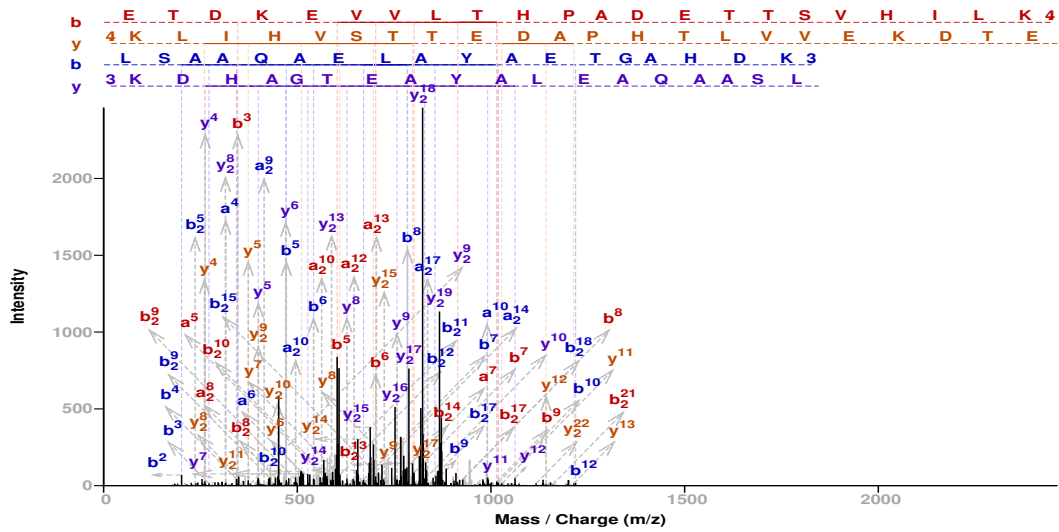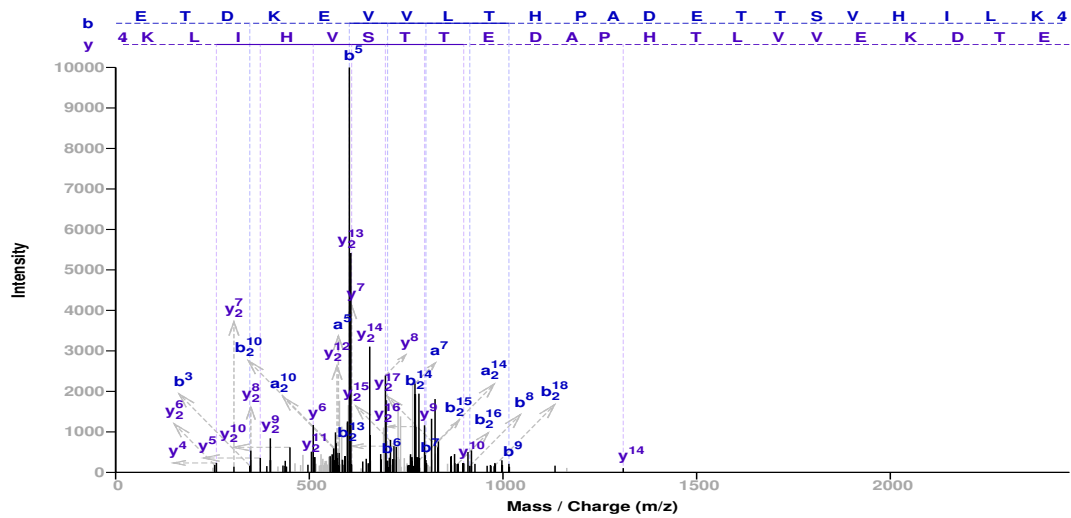

yeast00\_Scan\_Number\_2478 Precursor m/z: 486.777 cosine: 0.804  $\alpha$ : 0.451

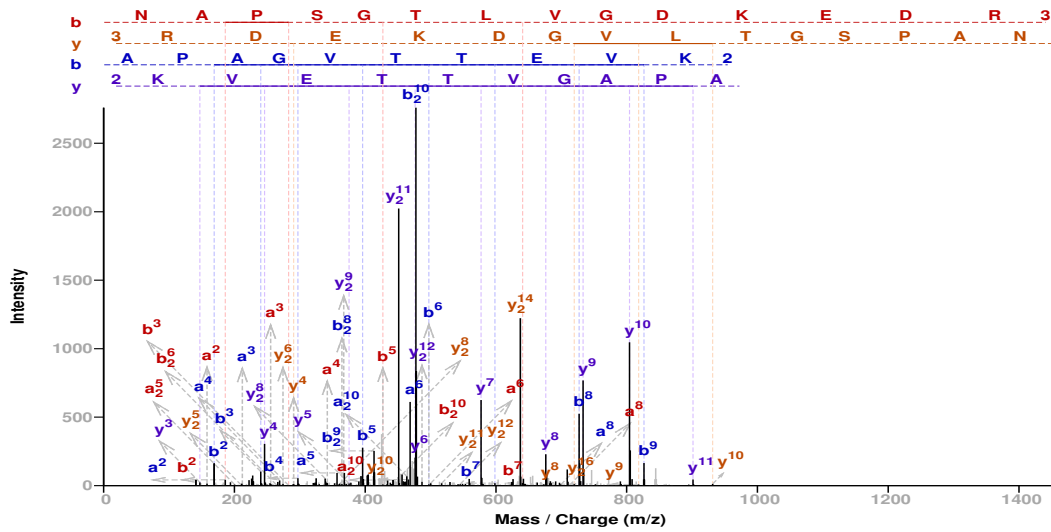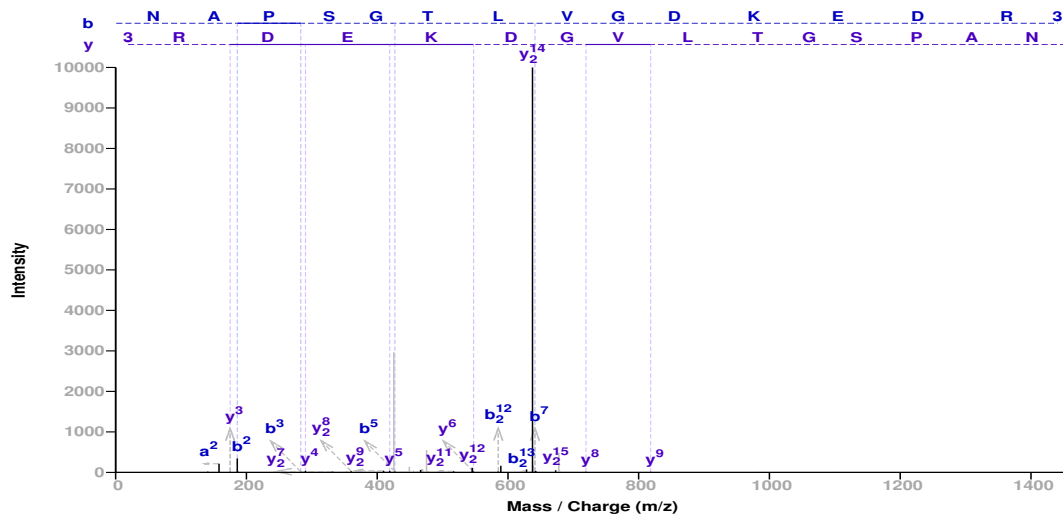

yeast00\_Scan\_Number\_6871 Precursor m/z: 543.800 cosine: 0.759  $\alpha$ : 0.449

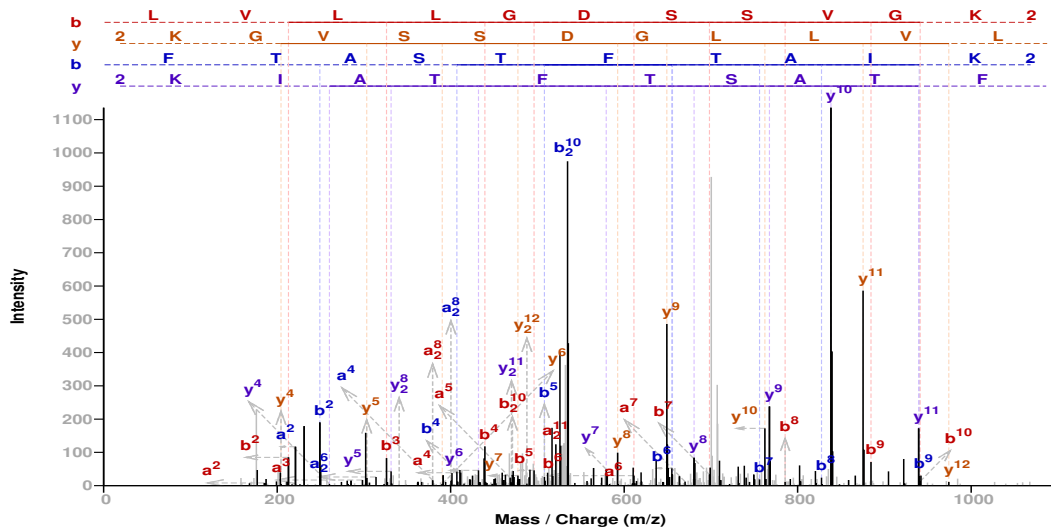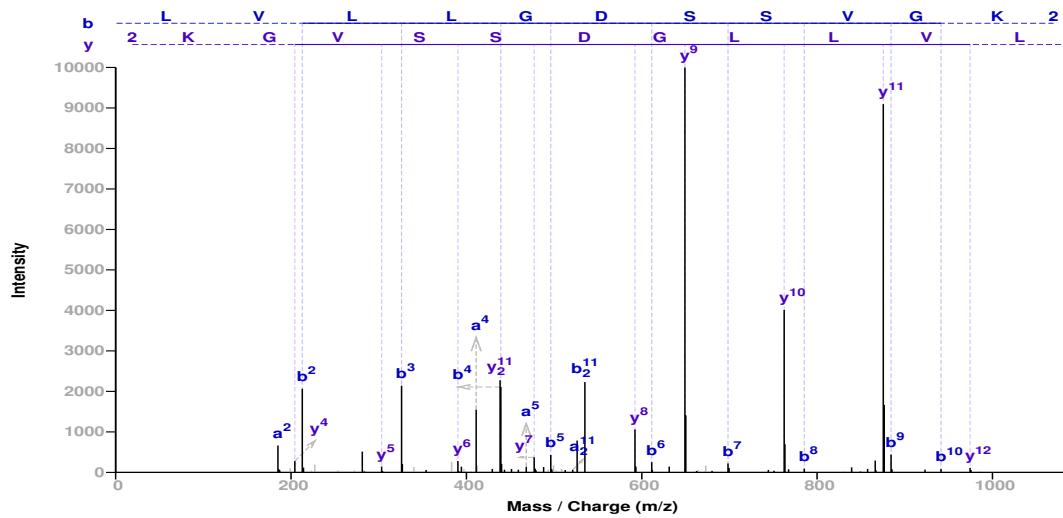

yeast00\_Scan\_Number\_6857 Precursor m/z: 851.942 cosine: 0.813  $\alpha$ : 0.433

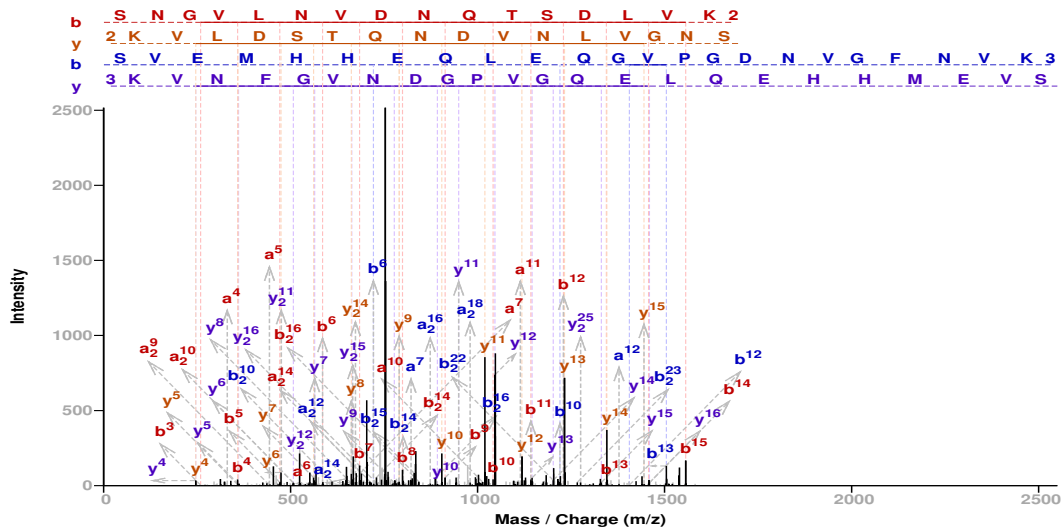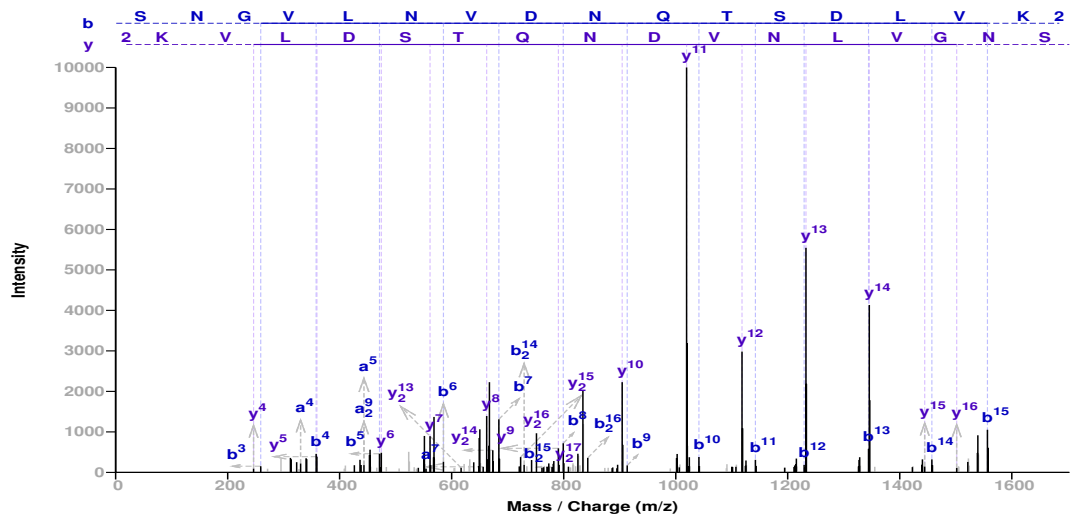

yeast00\_Scan\_Number\_6106 Precursor m/z: 399.892 cosine: 0.793  $\alpha$ : 0.430

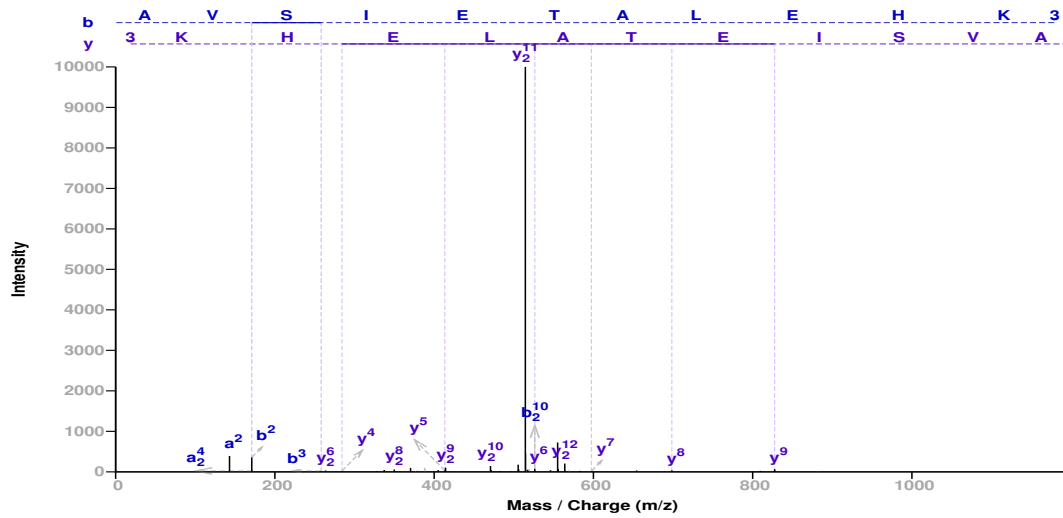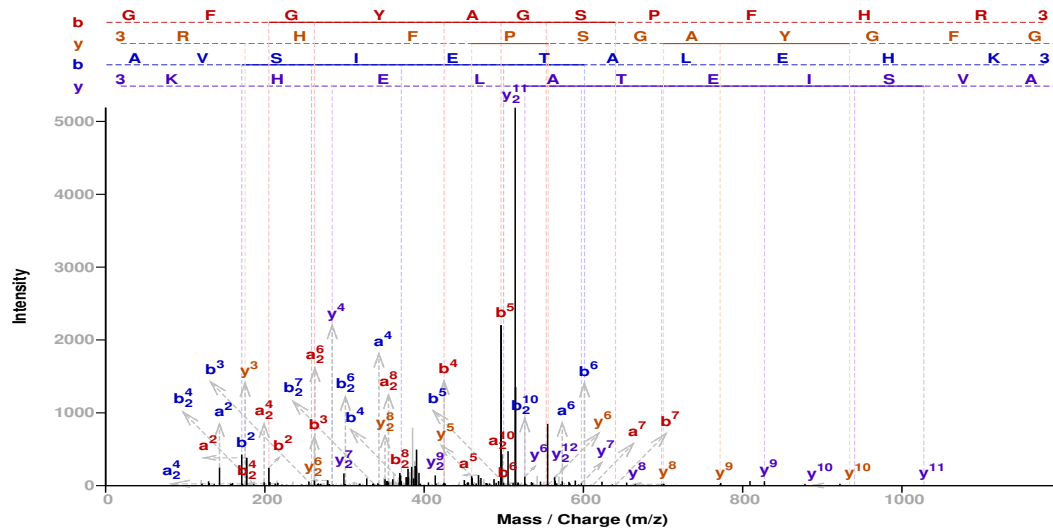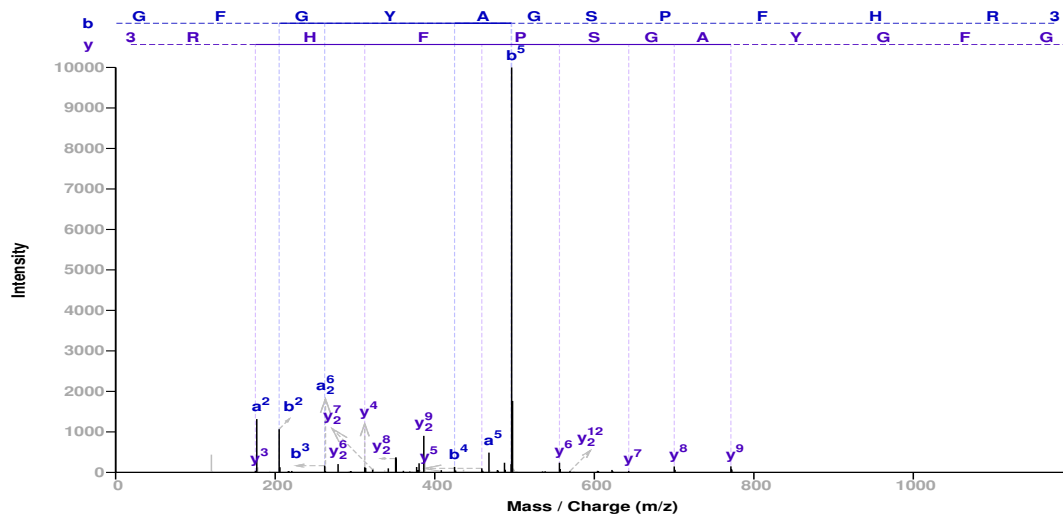





yeast00\_Scan\_Number\_6749 Precursor m/z: 598.878 cosine: 0.773  $\alpha$ : 0.422

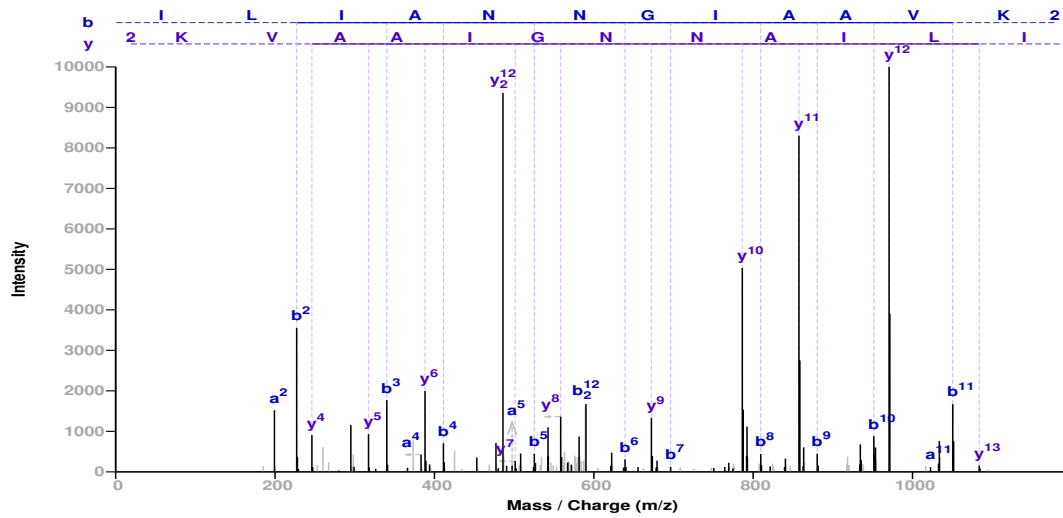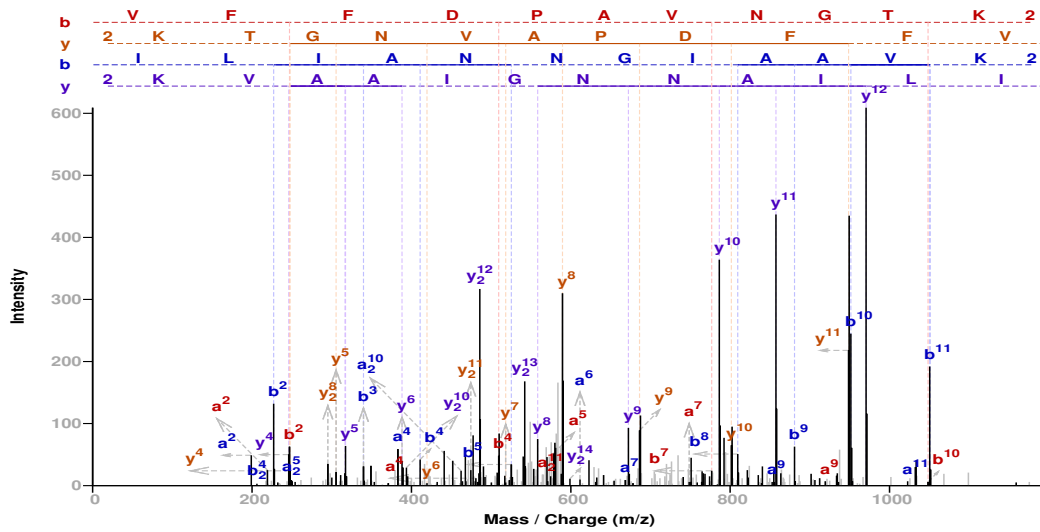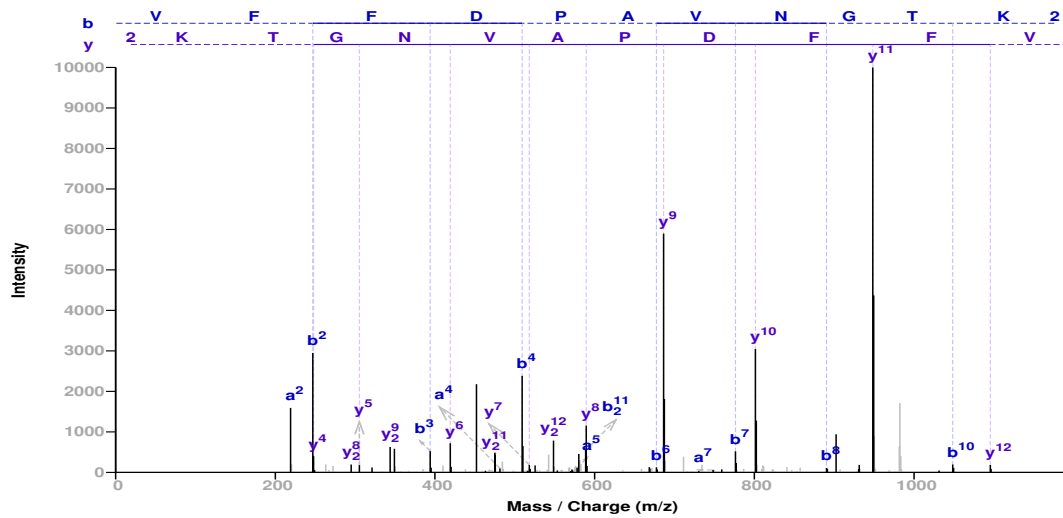

yeast00\_Scan\_Number\_4411 Precursor m/z: 468.748 cosine: 0.839  $\alpha$ : 0.421

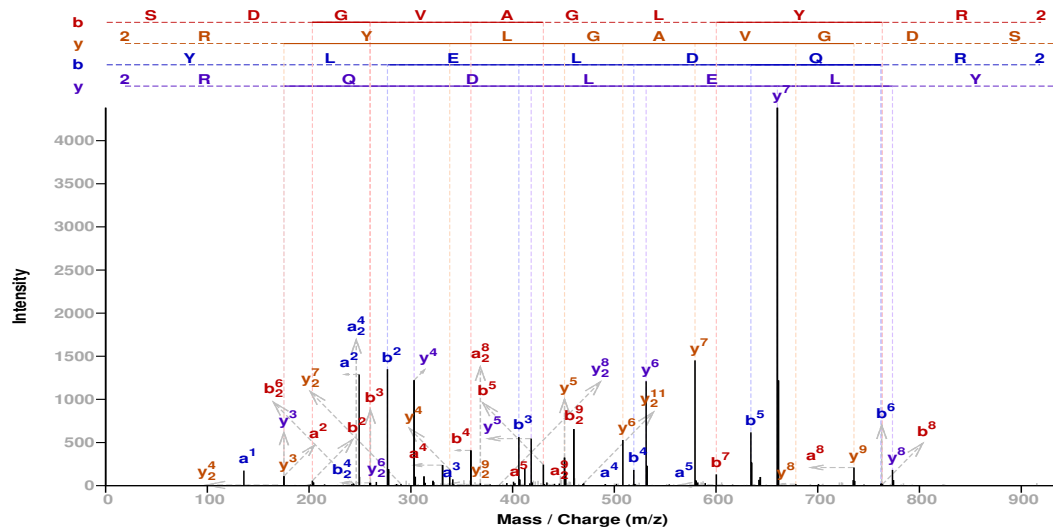

yeast00\_Scan\_Number\_6524 Precursor m/z: 413.271 cosine: 0.755  $\alpha$ : 0.420

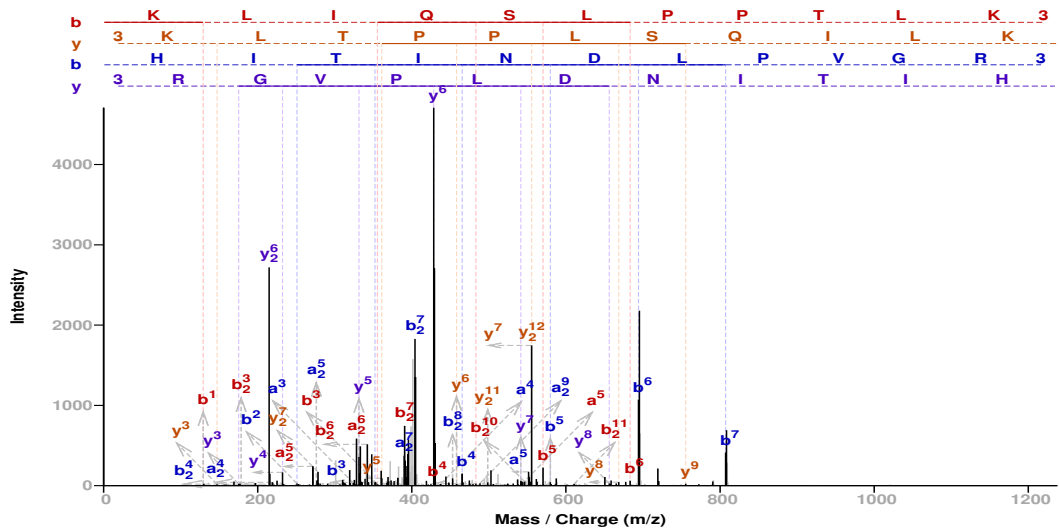



yeast00\_Scan\_Number\_710 Precursor m/z: 451.774 cosine: 0.778  $\alpha$ : 0.410

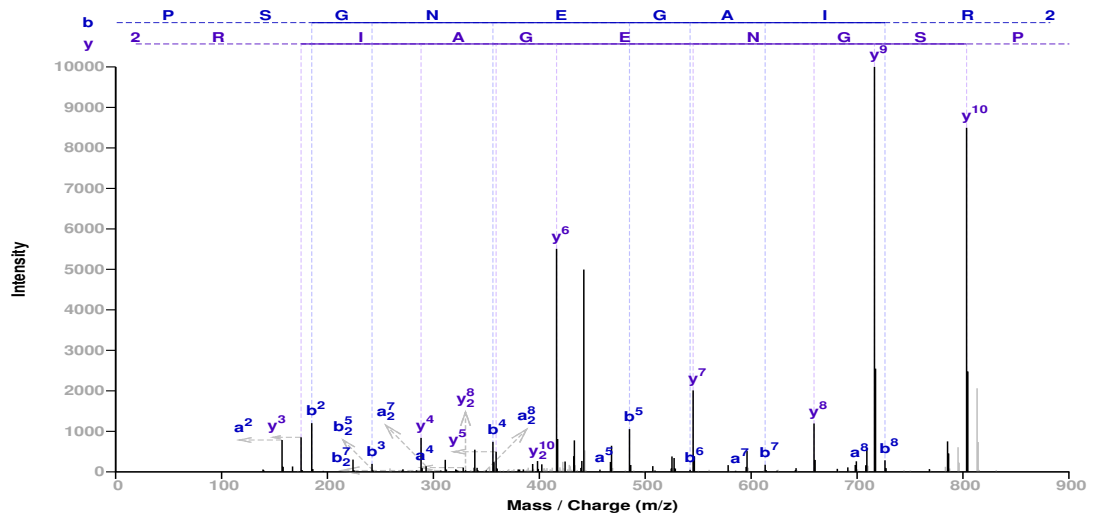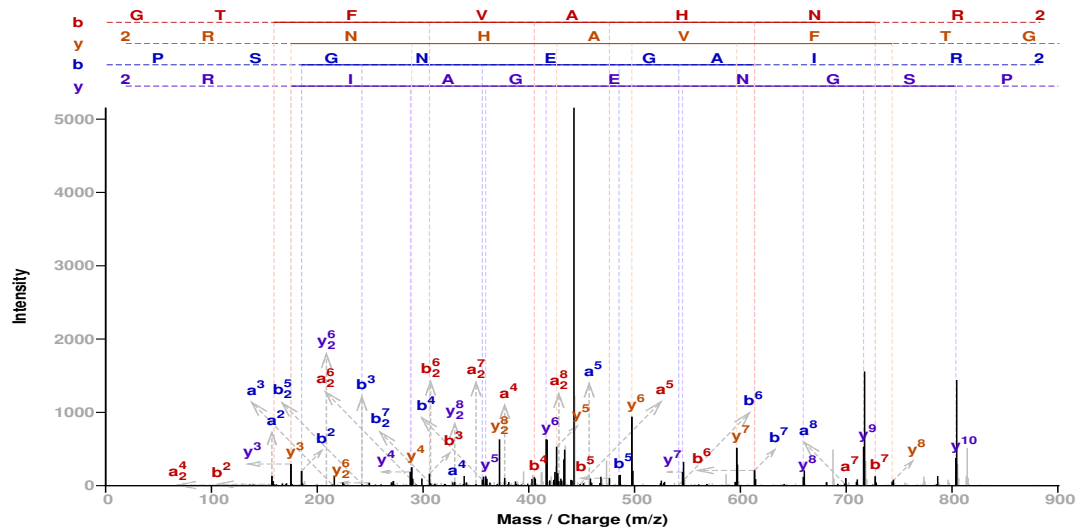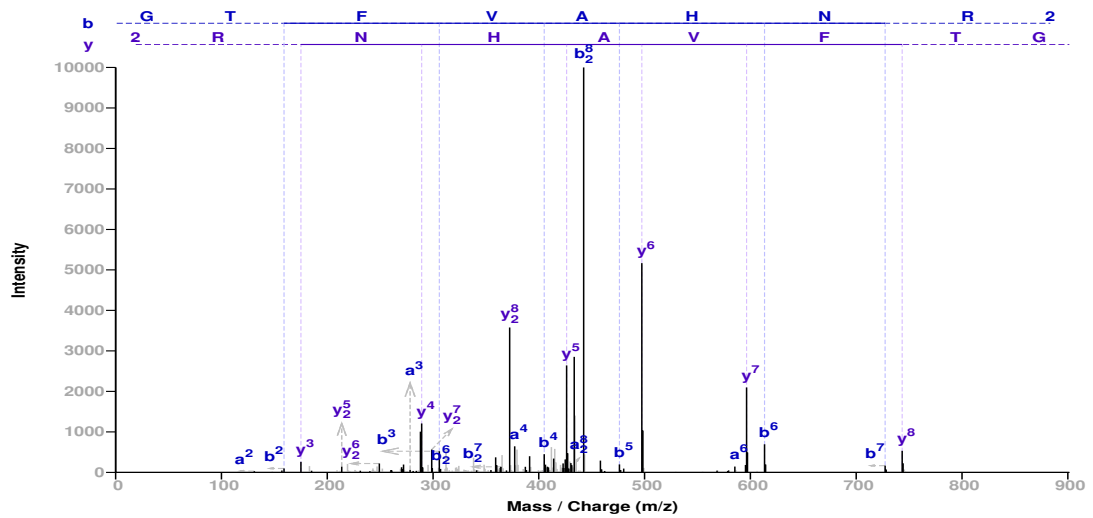

yeast00\_Scan\_Number\_6442 Precursor m/z: 412.239 cosine: 0.897  $\alpha$ : 0.410

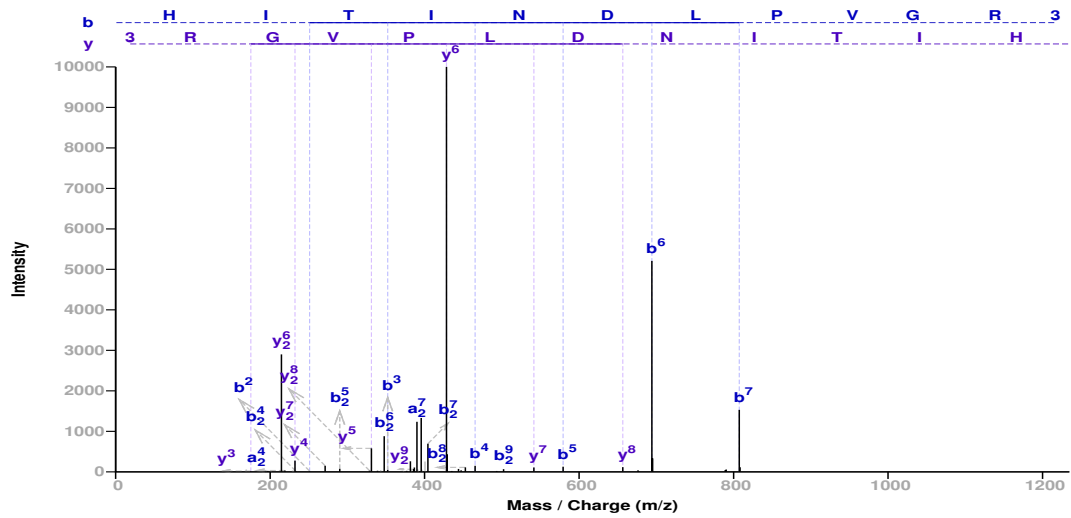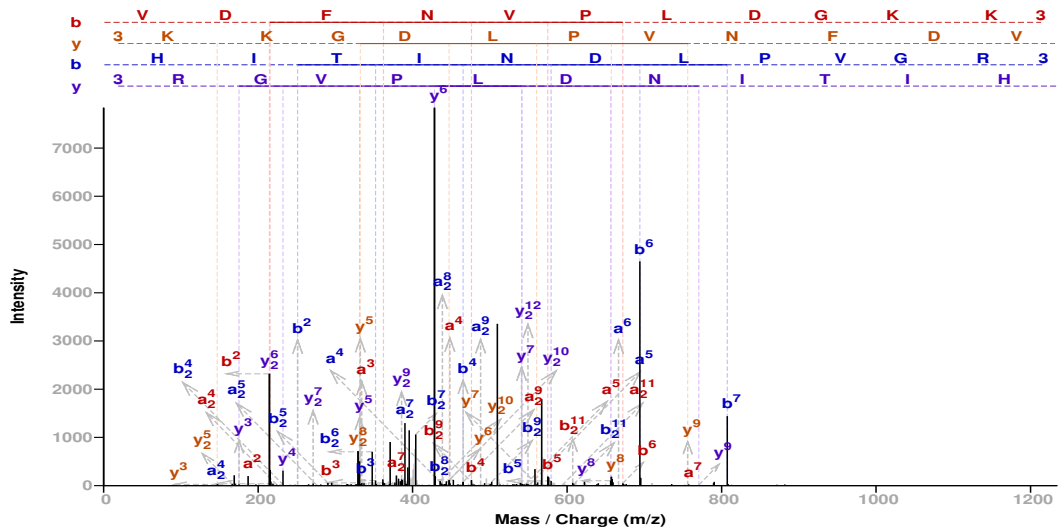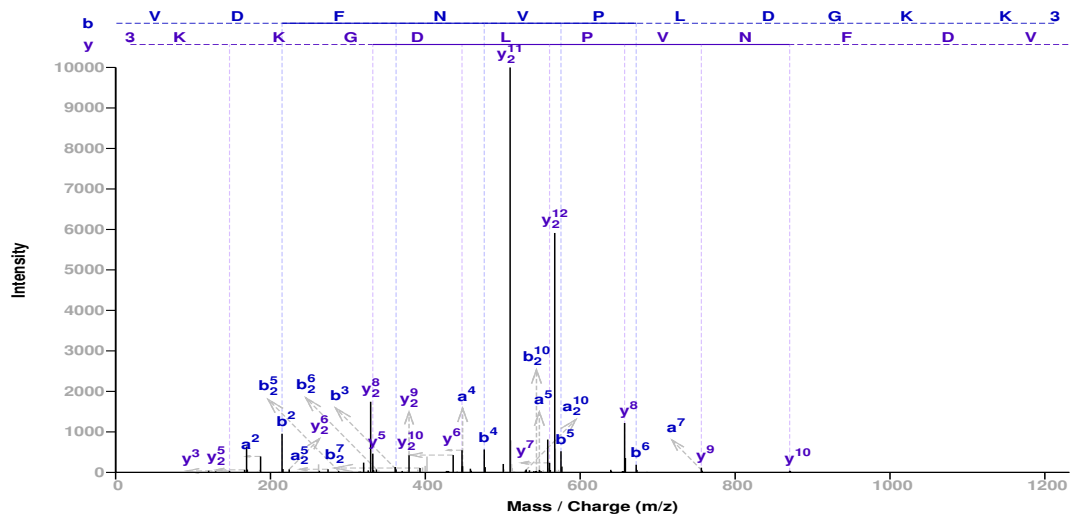

yeast00\_Scan\_Number\_3302 Precursor m/z: 423.899 cosine: 0.922  $\alpha$ : 0.407

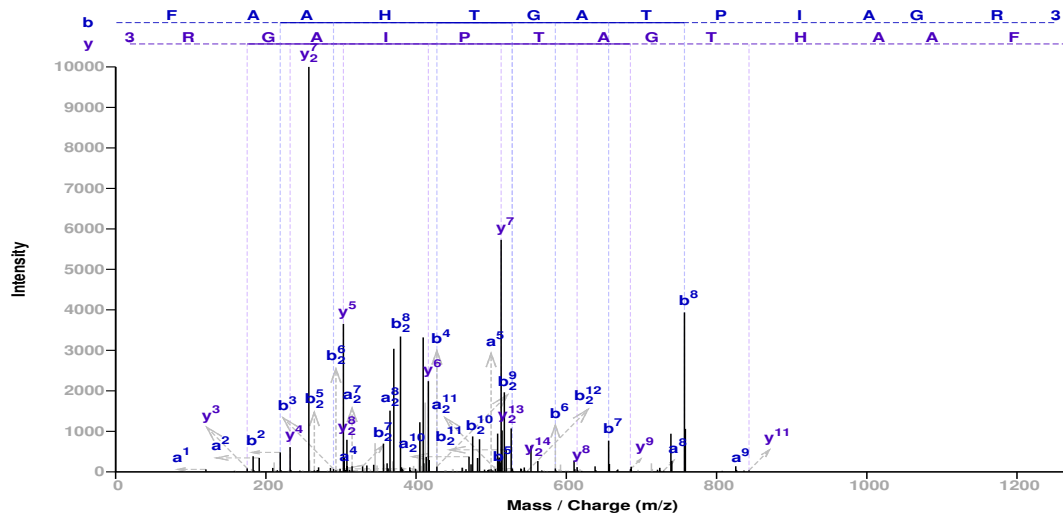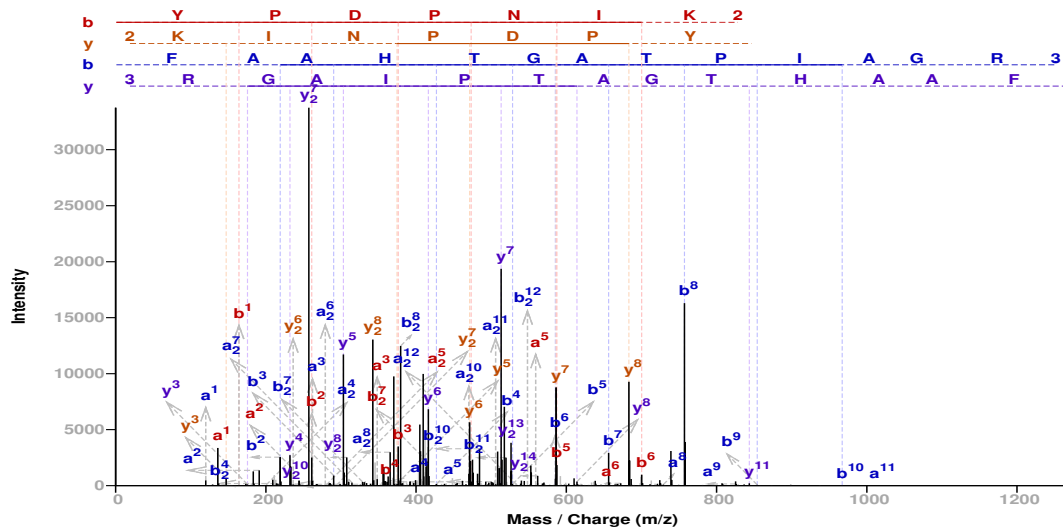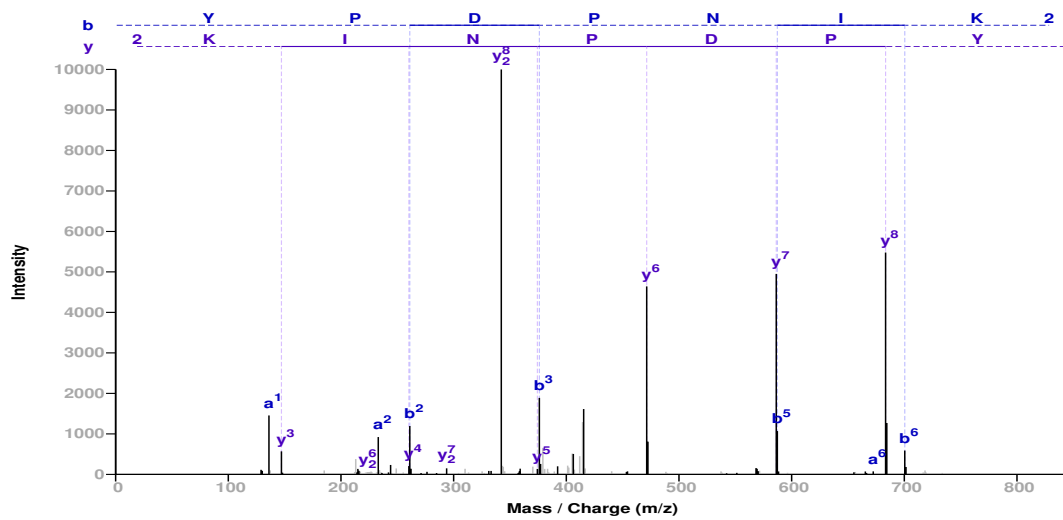



yeast00\_Scan\_Number\_874 Precursor m/z: 417.244 cosine: 0.781  $\alpha$ : 0.404

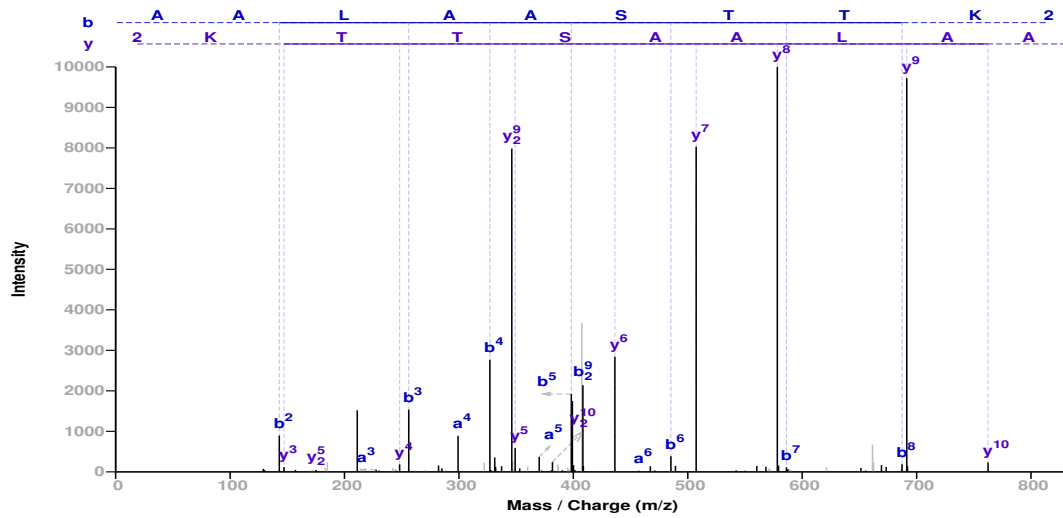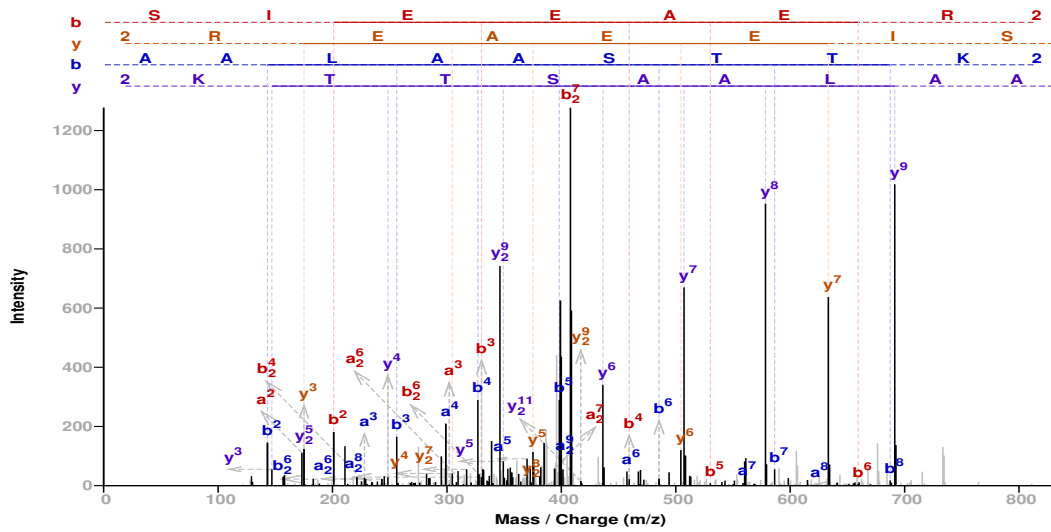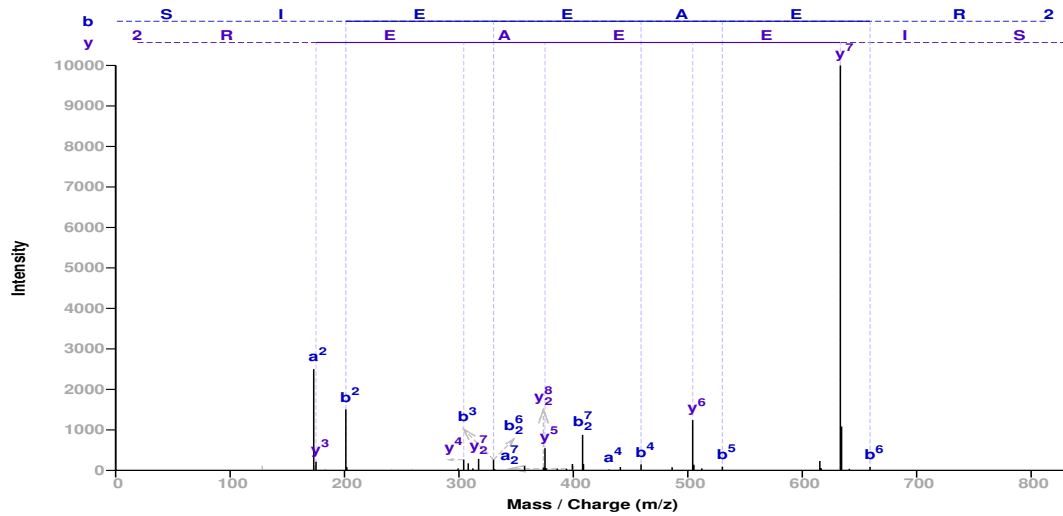

yeast00\_Scan\_Number\_5544 Precursor m/z: 433.781 cosine: 0.813  $\alpha$ : 0.399

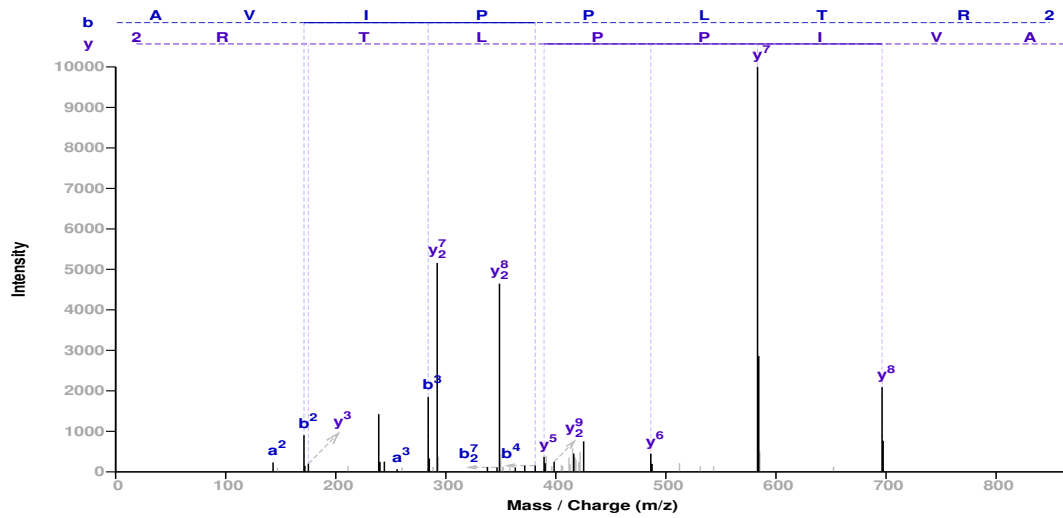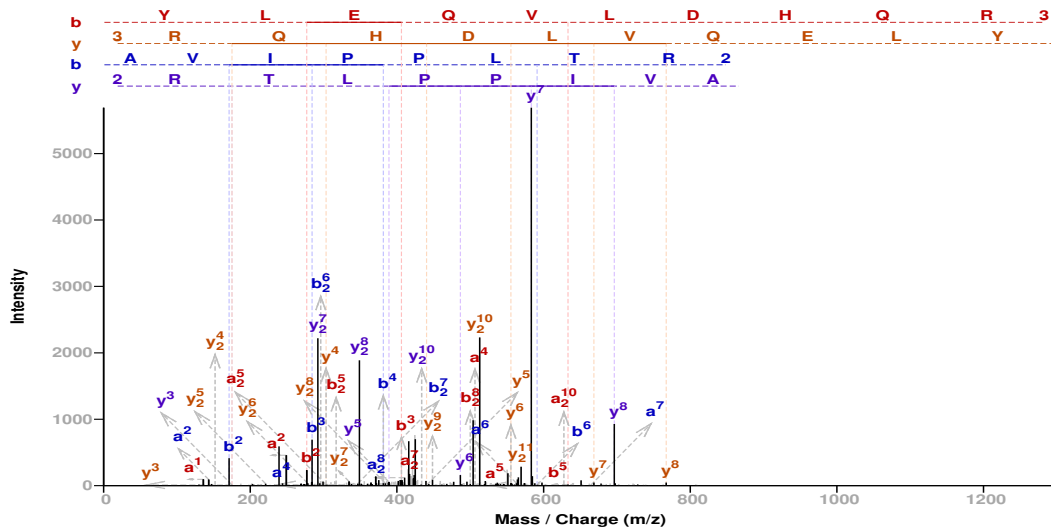

yeast00\_Scan\_Number\_2010 Precursor m/z: 515.791 cosine: 0.884  $\alpha$ : 0.397

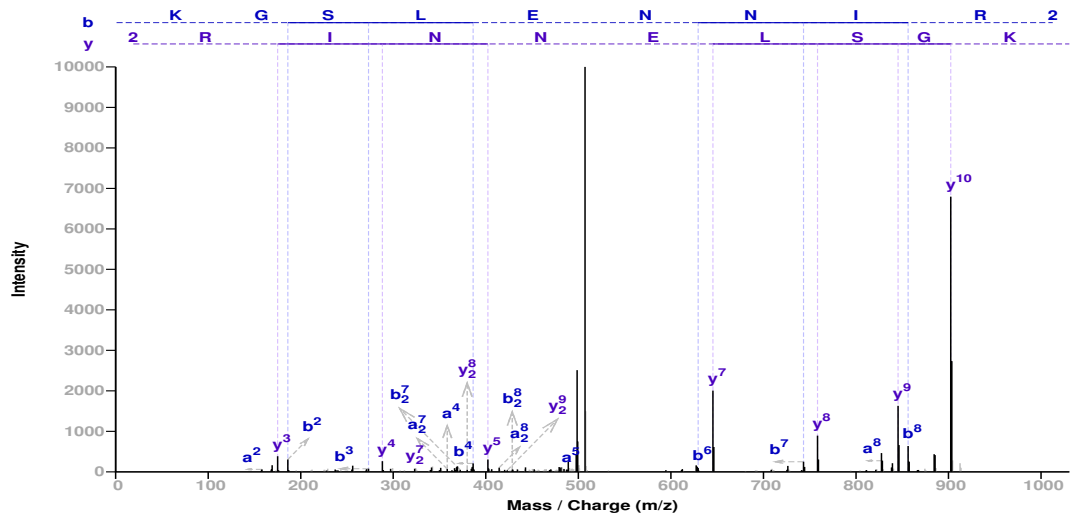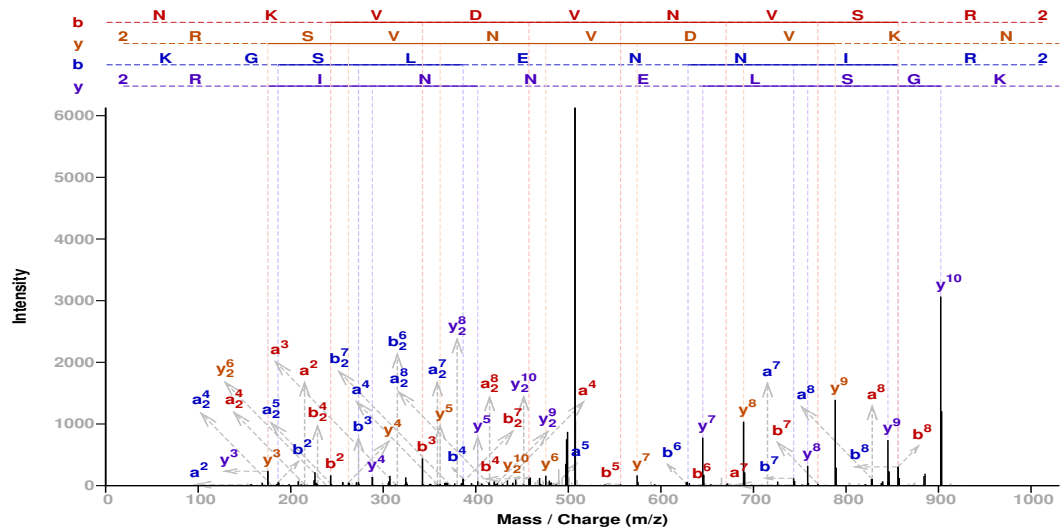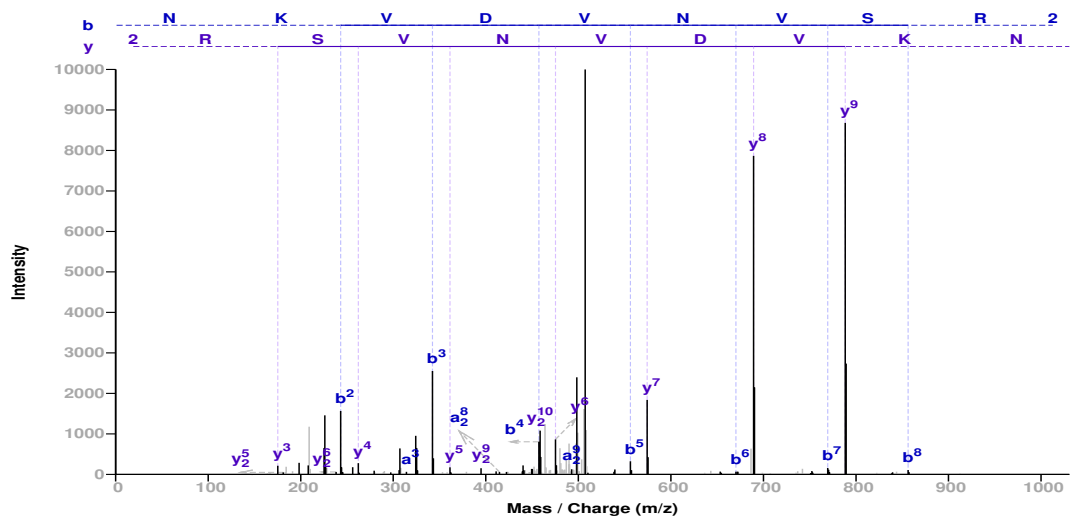

yeast00\_Scan\_Number\_7444 Precursor m/z: 667.368 cosine: 0.772  $\alpha$ : 0.395

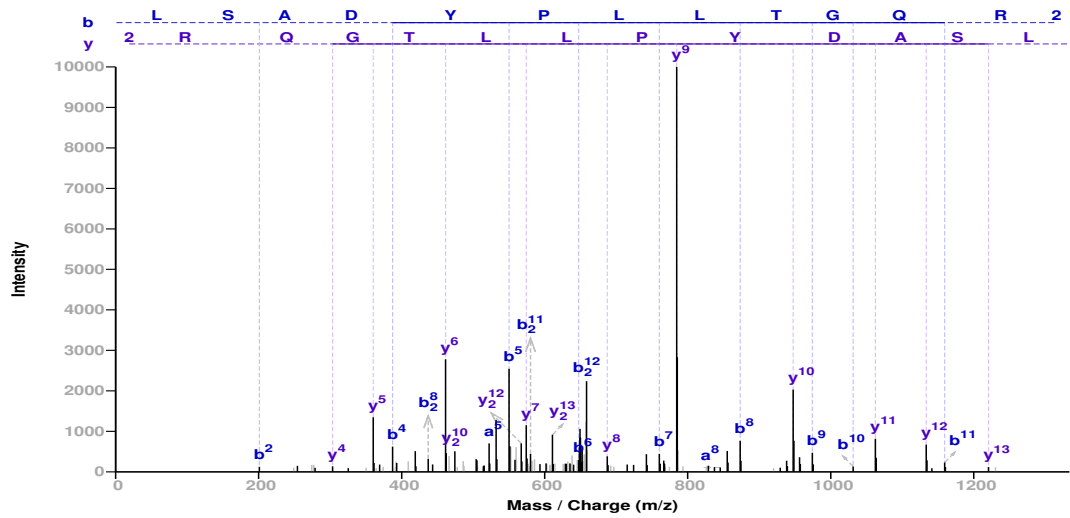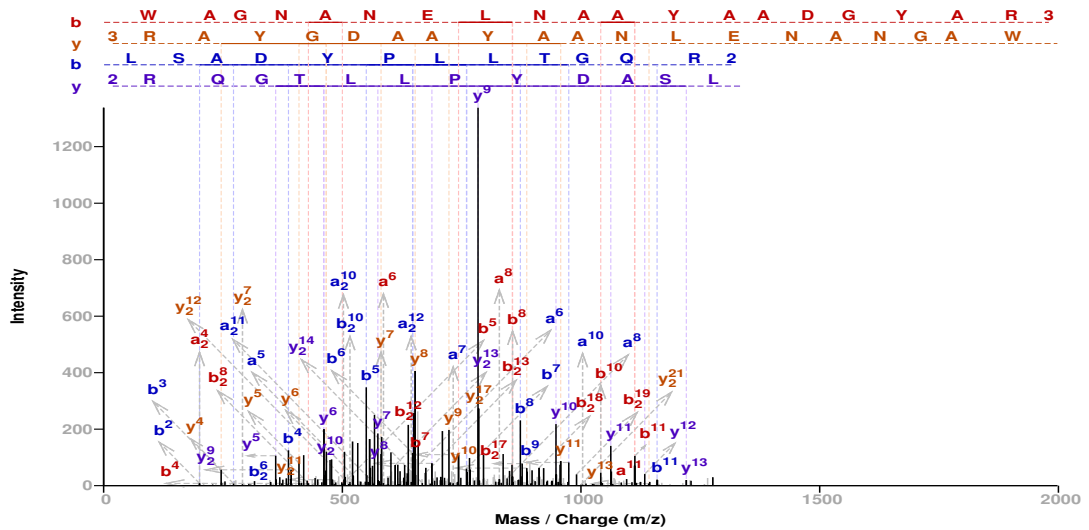

yeast00.Scan\_Number\_10531 Precursor m/z: 789.914 cosine: 0.818  $\alpha$ : 0.391

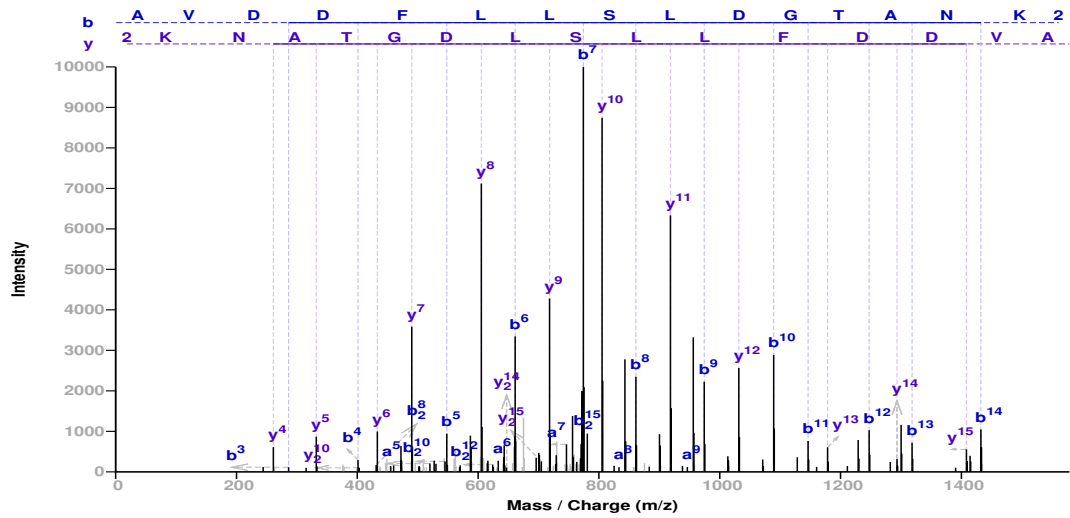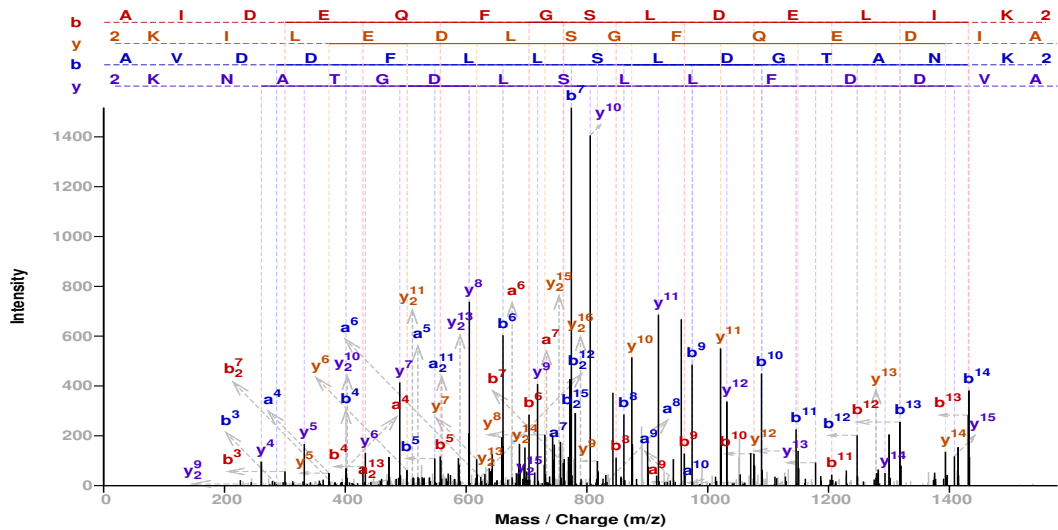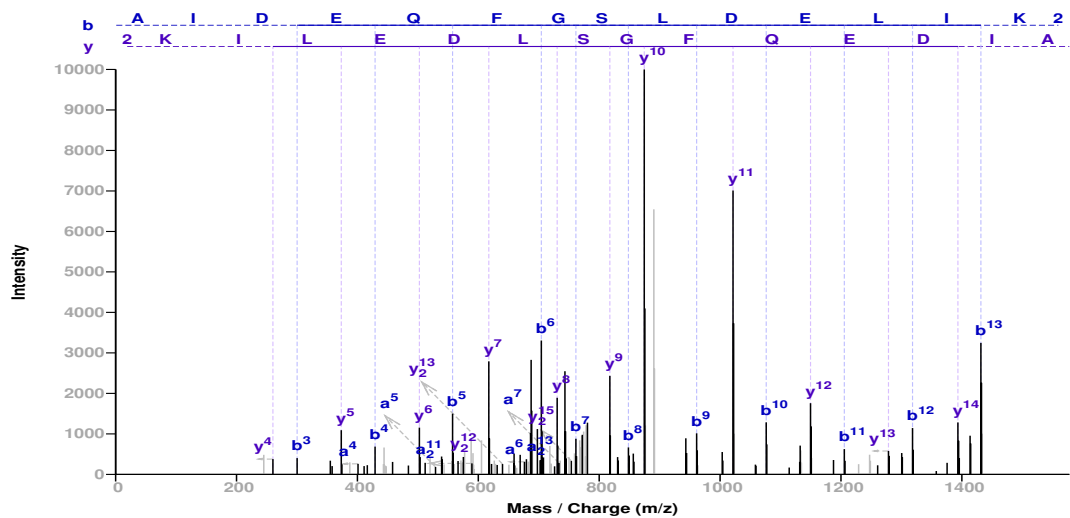

yeast00\_Scan\_Number\_4318 Precursor m/z: 517.267 cosine: 0.721  $\alpha$ : 0.388

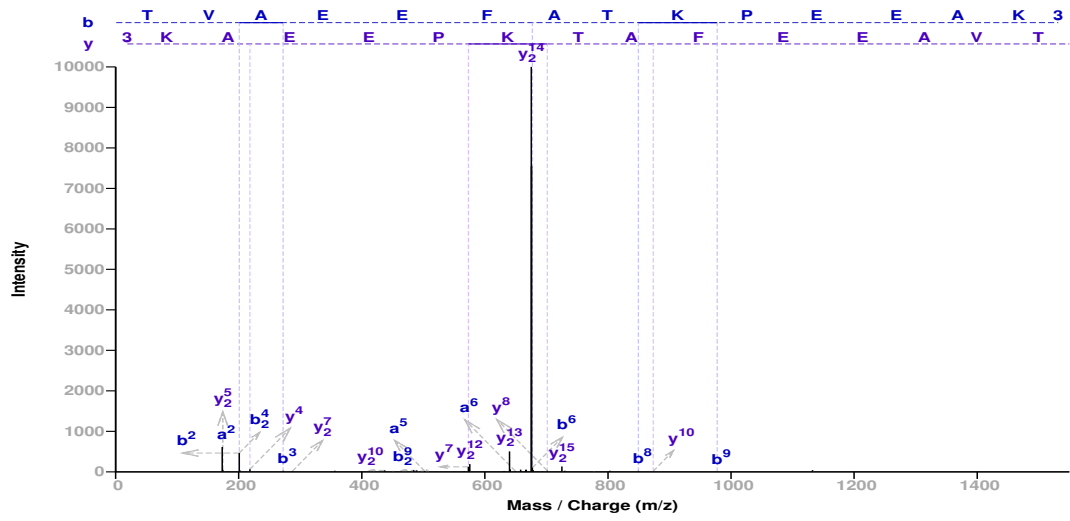

yeast00\_Scan\_Number\_4077 Precursor m/z: 626.854 cosine: 0.760  $\alpha$ : 0.386

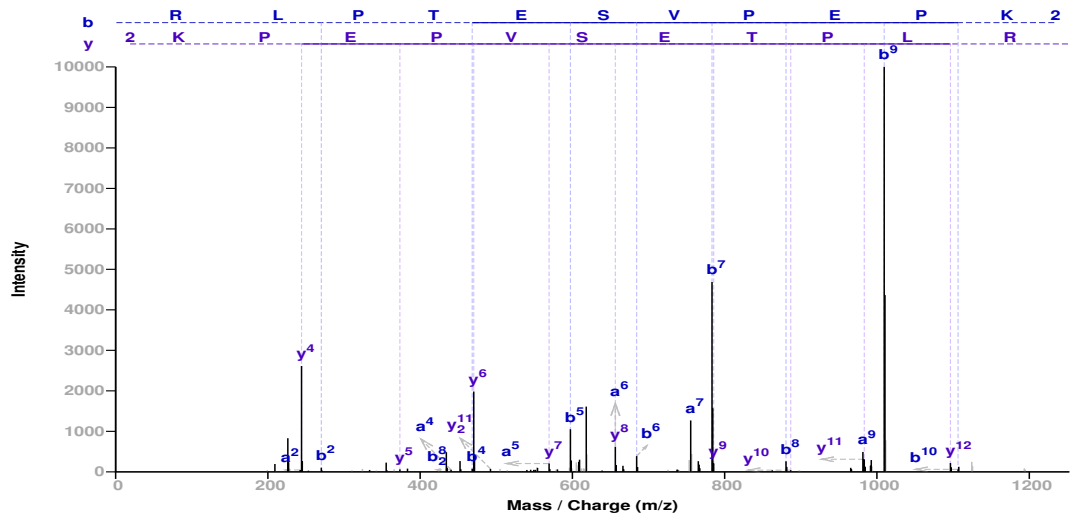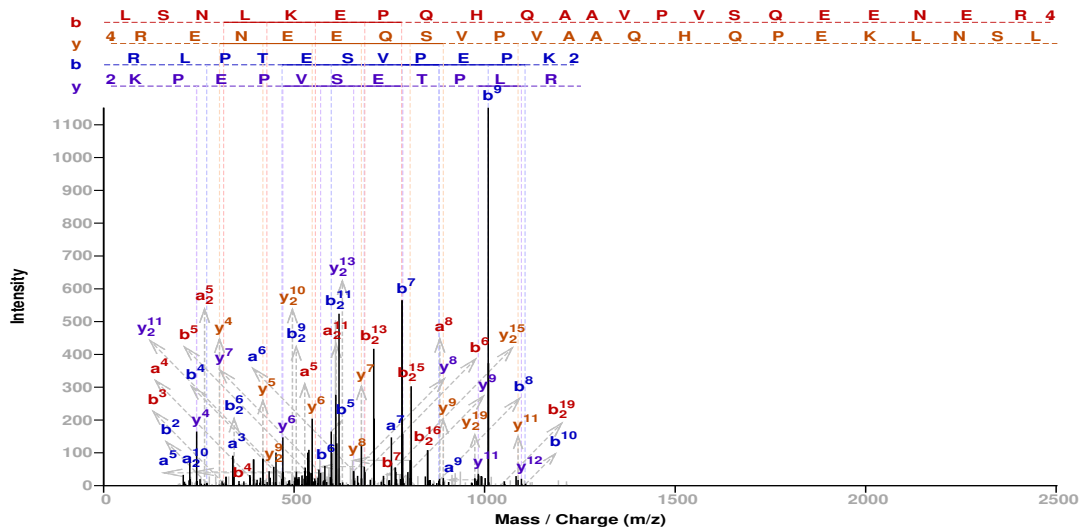

yeast00\_Scan\_Number\_1880 Precursor m/z: 438.216 cosine: 0.784  $\alpha$ : 0.379

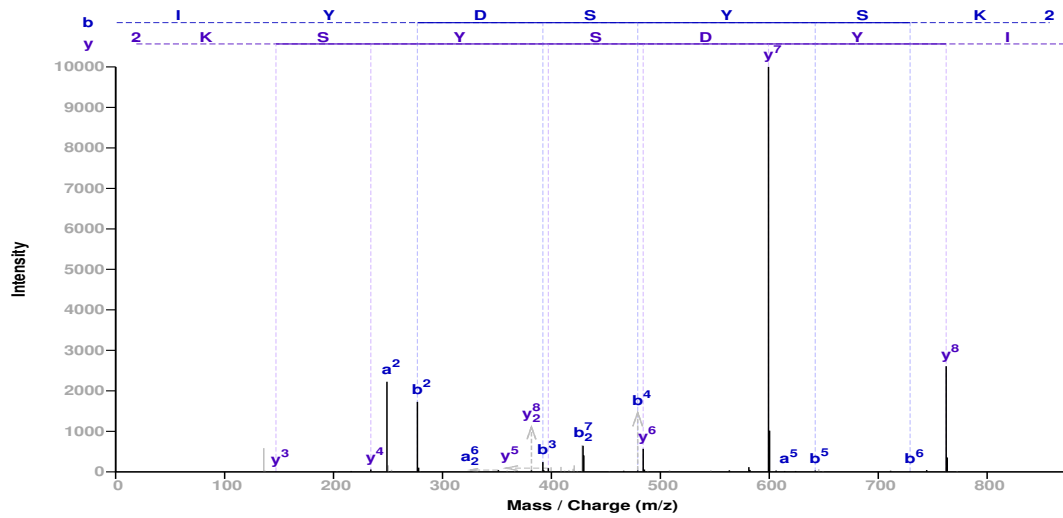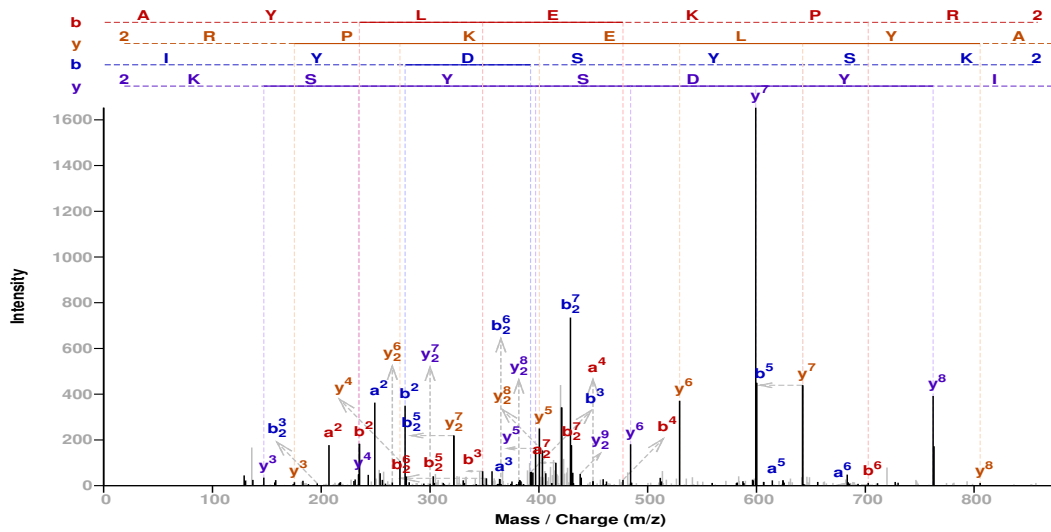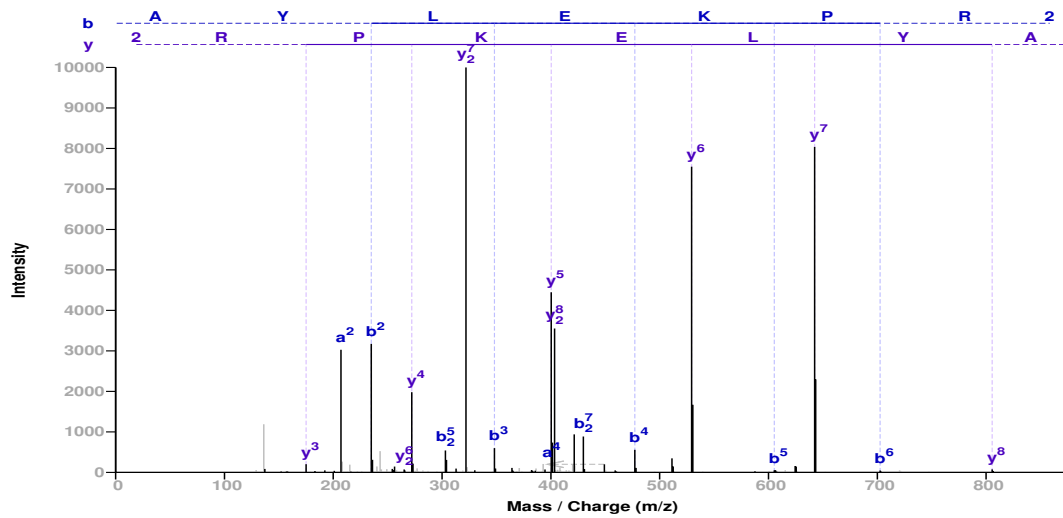



yeast00\_Scan\_Number\_8238 Precursor m/z: 815.486 cosine: 0.772  $\alpha$ : 0.374

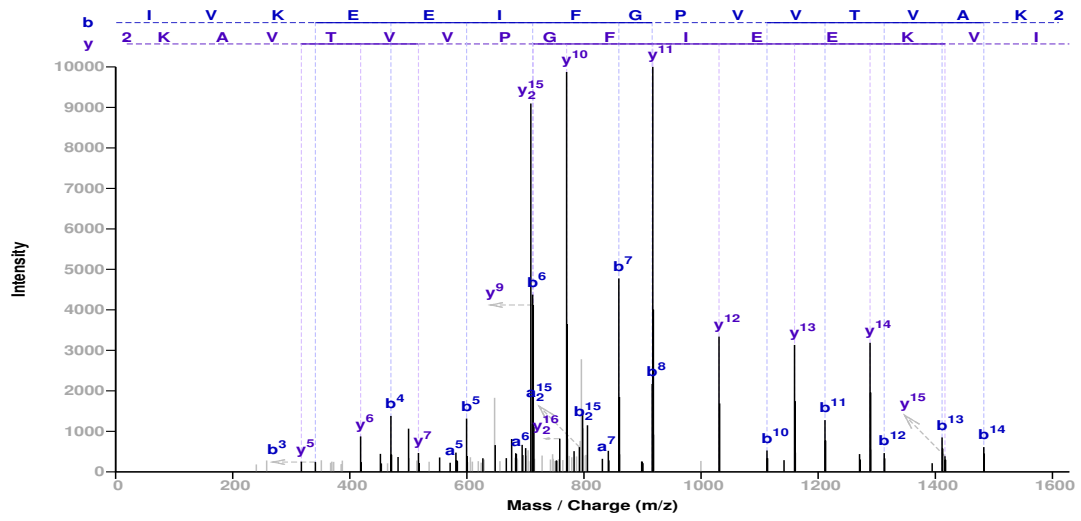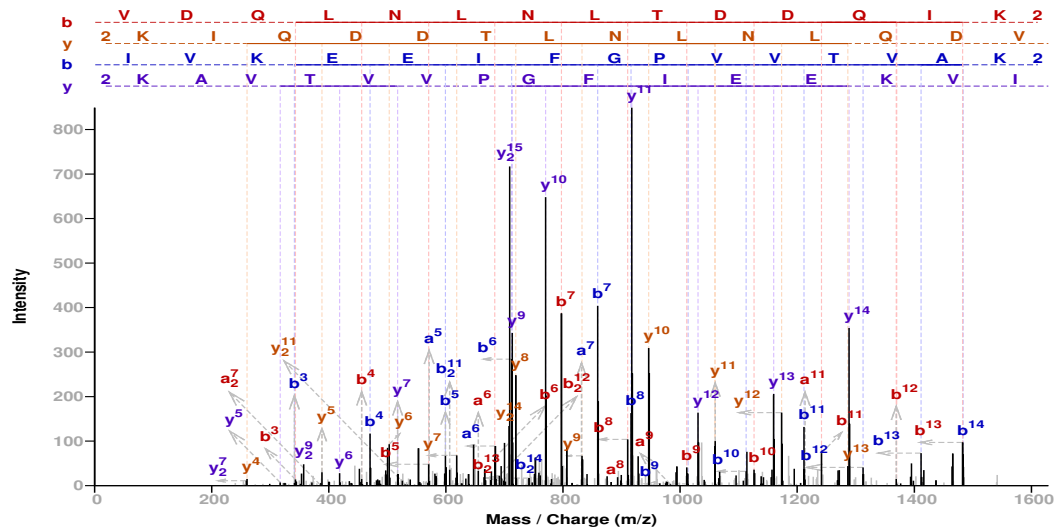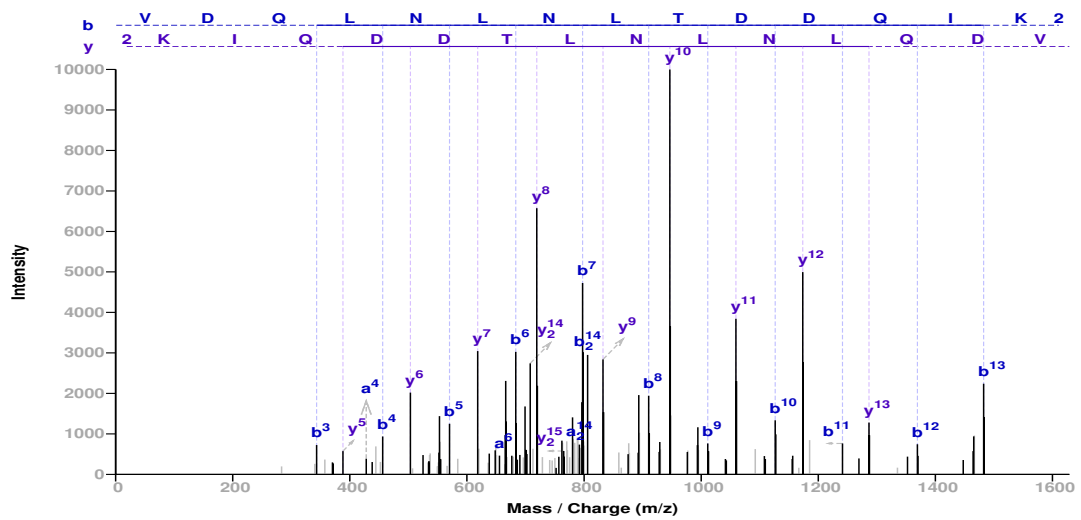

yeast00\_Scan\_Number\_3617 Precursor m/z: 327.673 cosine: 0.900  $\alpha$ : 0.369

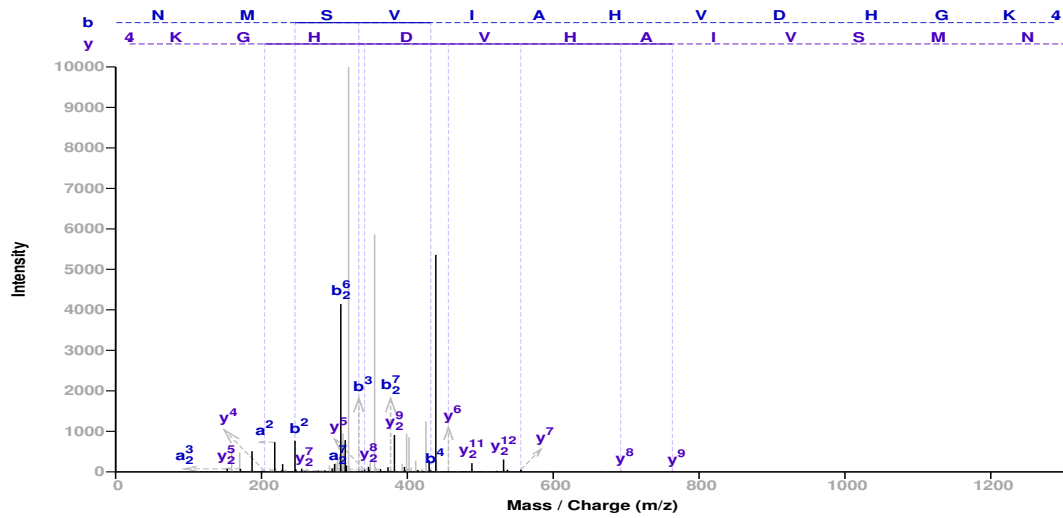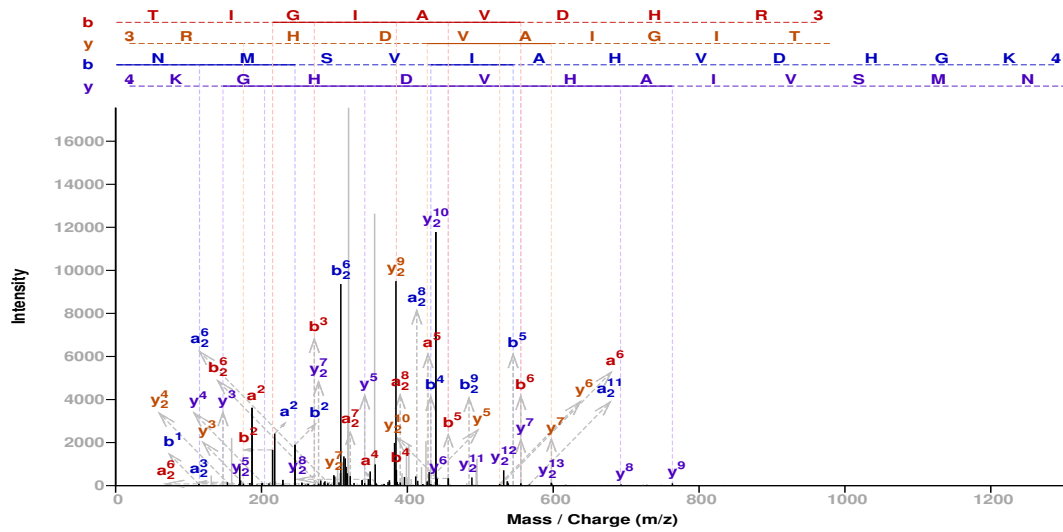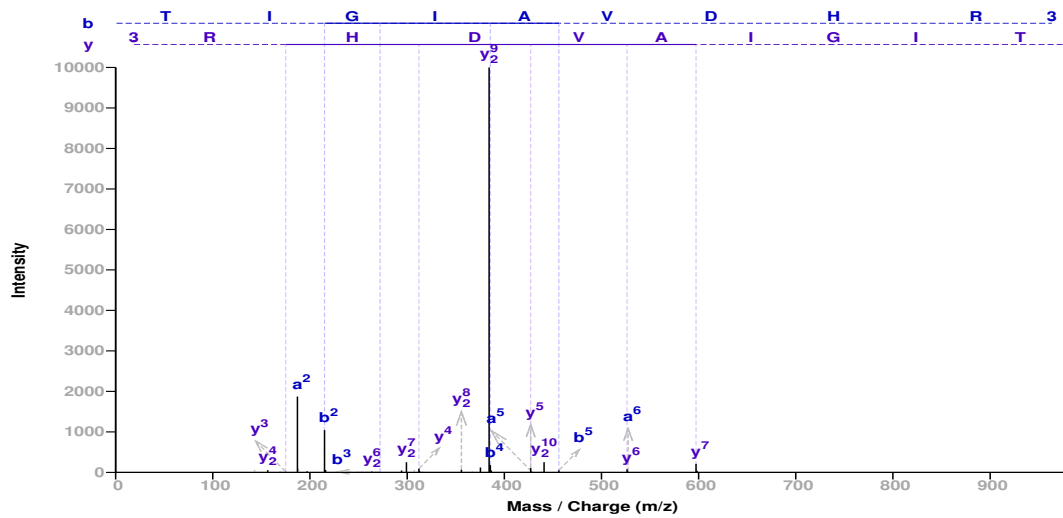

yeast00\_Scan\_Number\_4802 Precursor m/z: 497.278 cosine: 0.866  $\alpha$ : 0.361

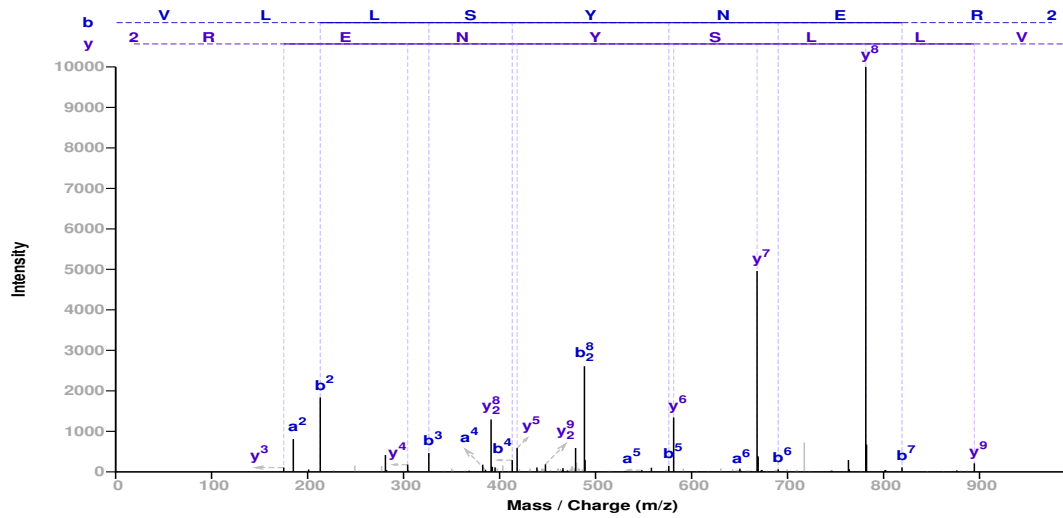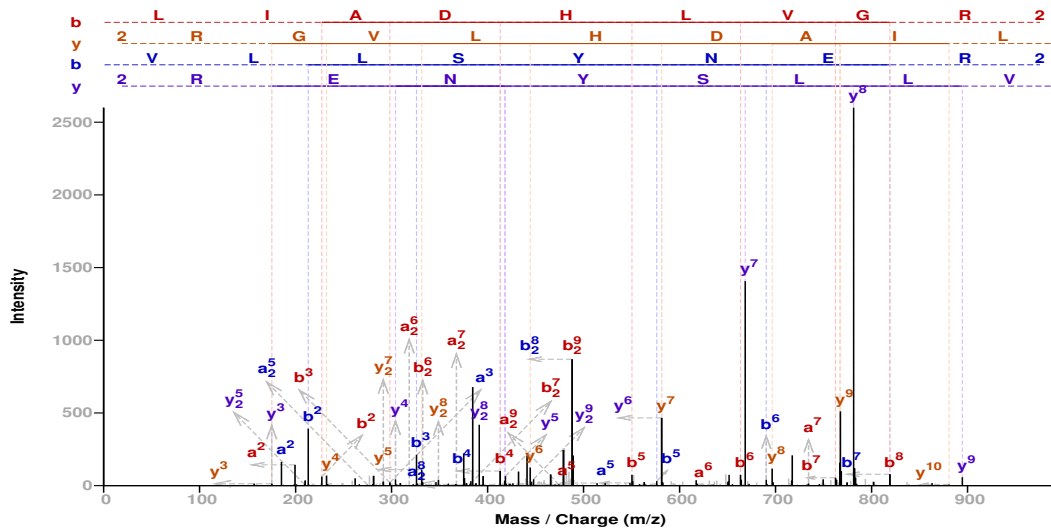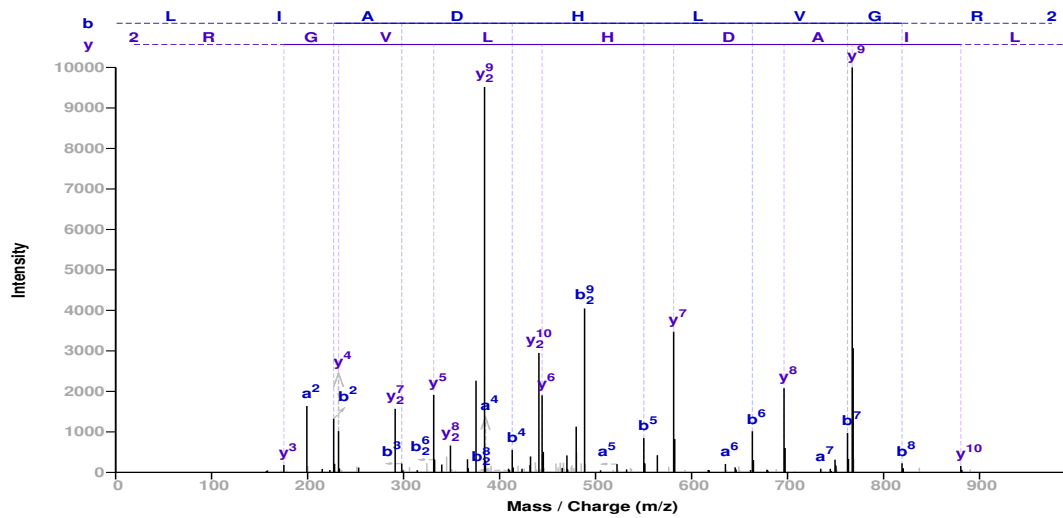

yeast00\_Scan\_Number\_3665 Precursor m/z: 630.820 cosine: 0.816  $\alpha$ : 0.361

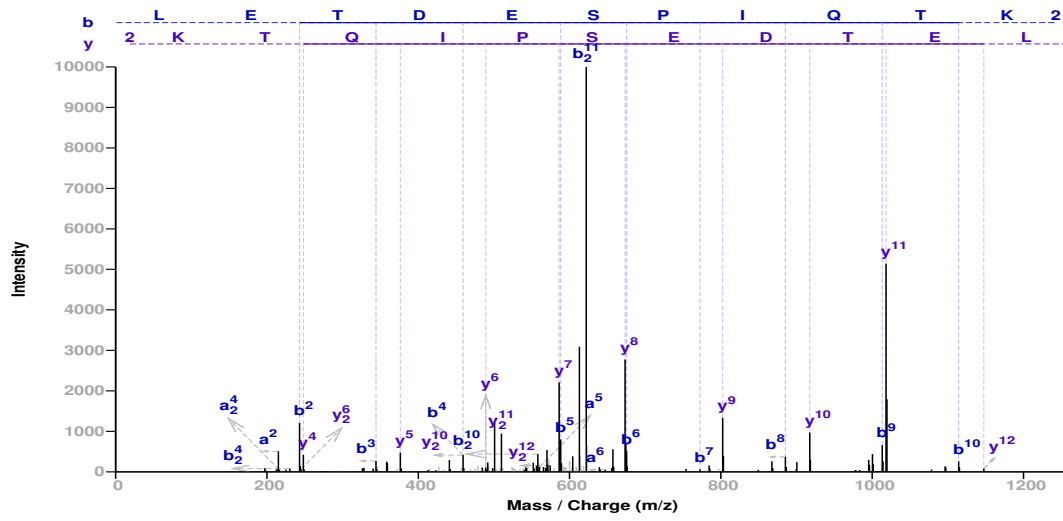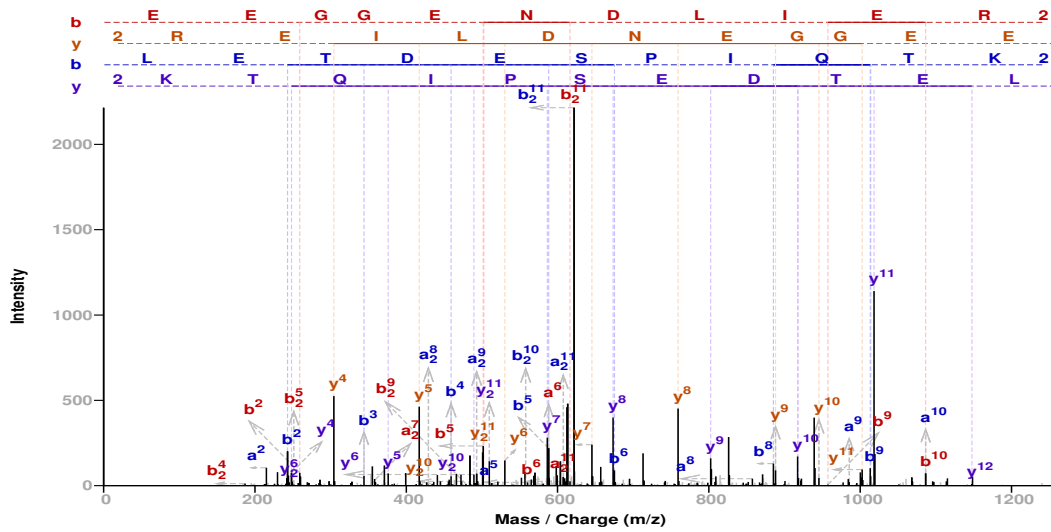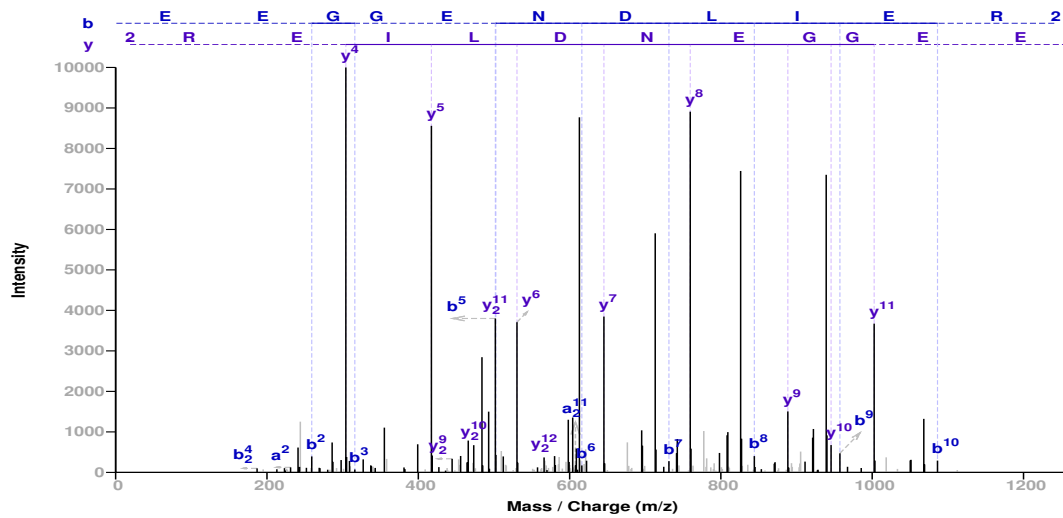

yeast00\_Scan\_Number\_3477 Precursor m/z: 354.704 cosine: 0.940  $\alpha$ : 0.356

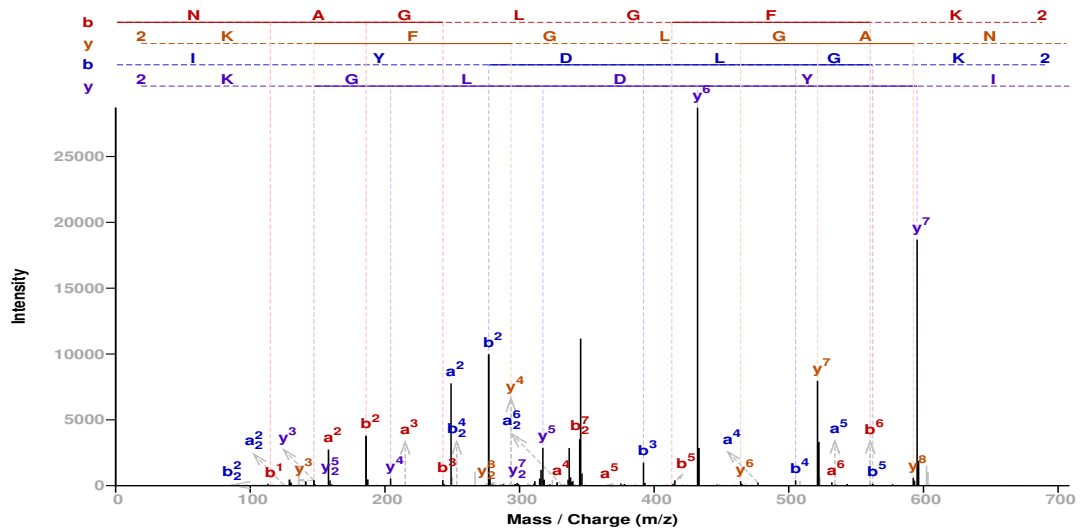

yeast00\_Scan\_Number\_5810 Precursor m/z: 590.343 cosine: 0.769  $\alpha$ : 0.356

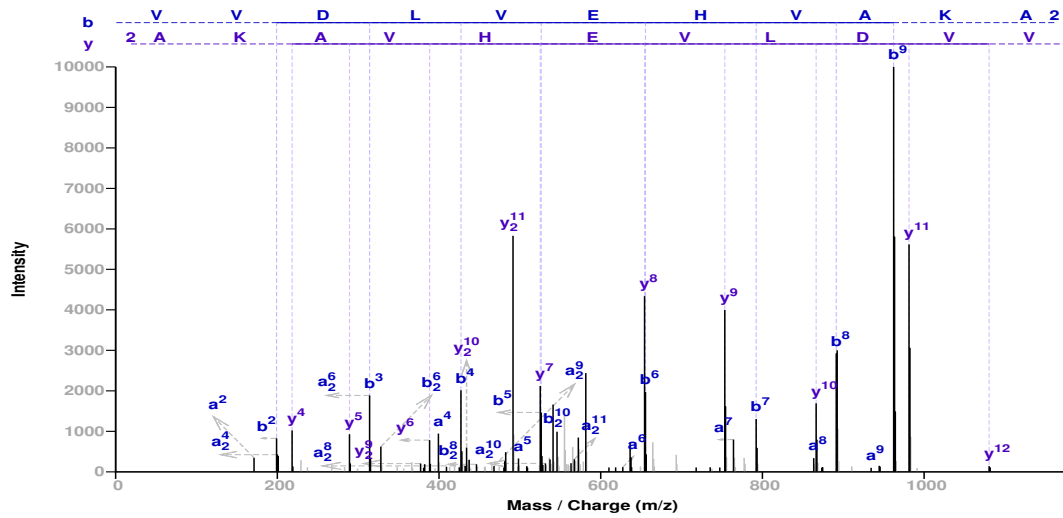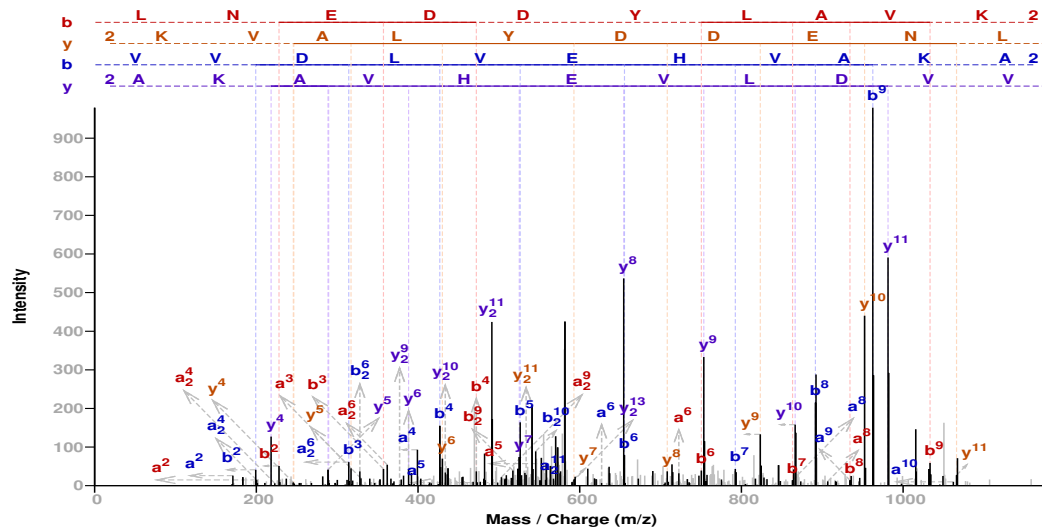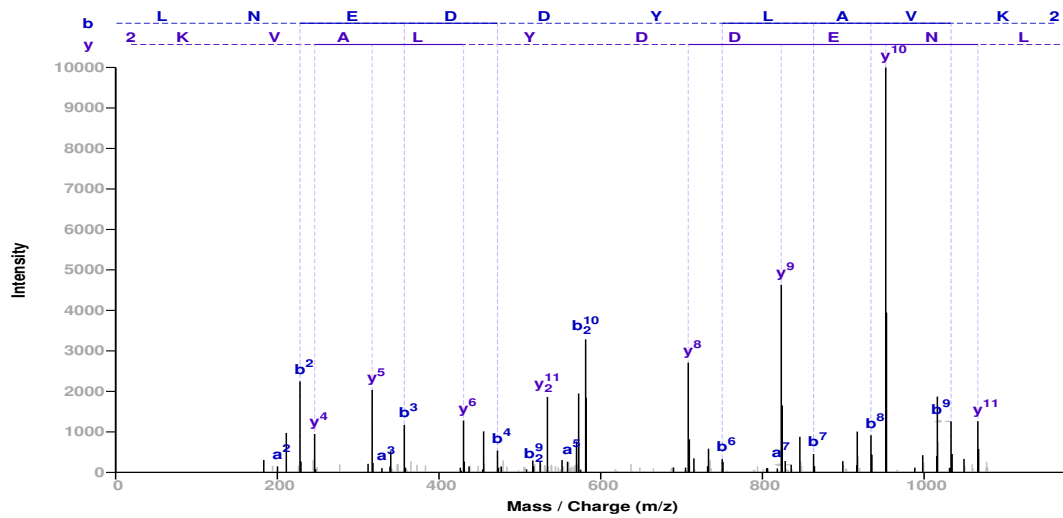

yeast00\_Scan\_Number\_3258 Precursor m/z: 507.247 cosine: 0.733  $\alpha$ : 0.355

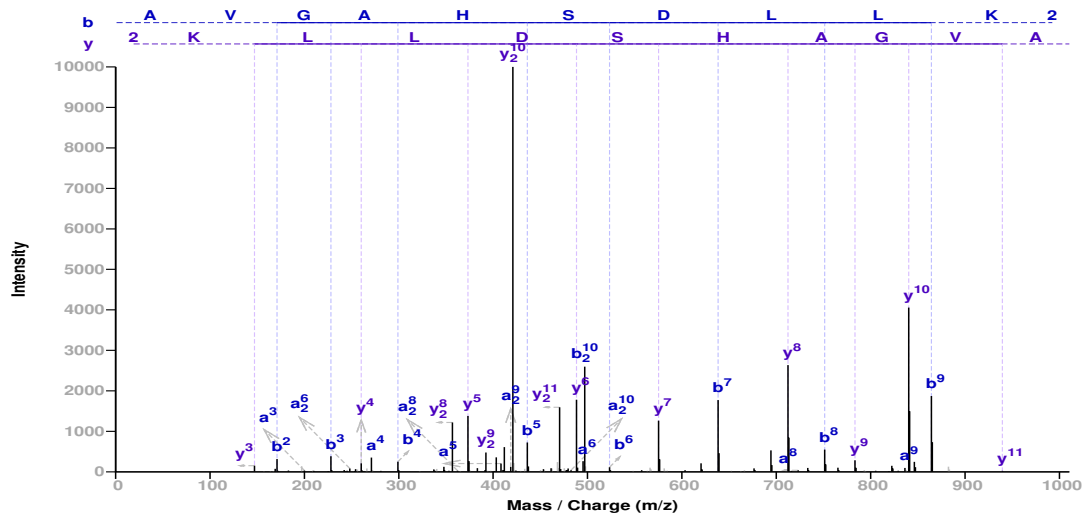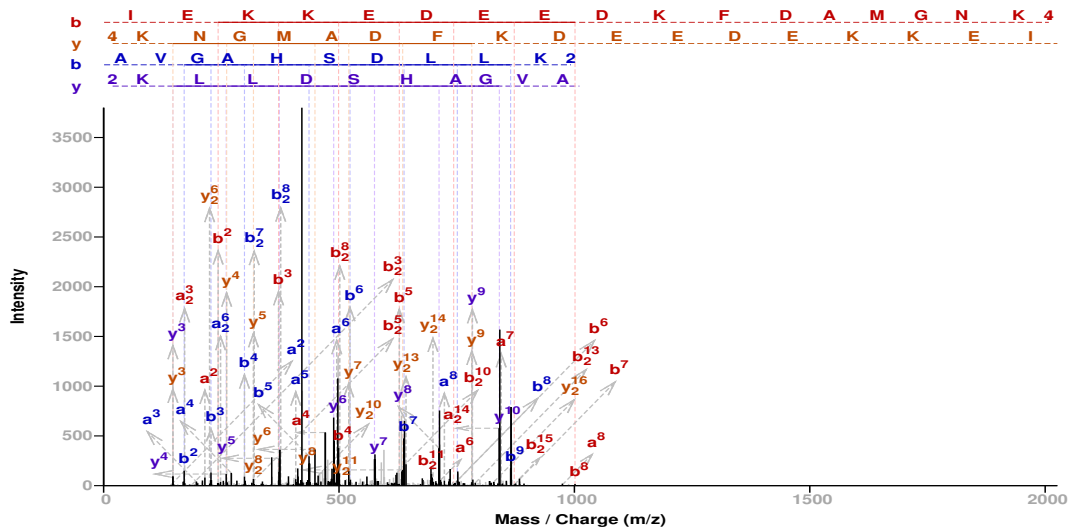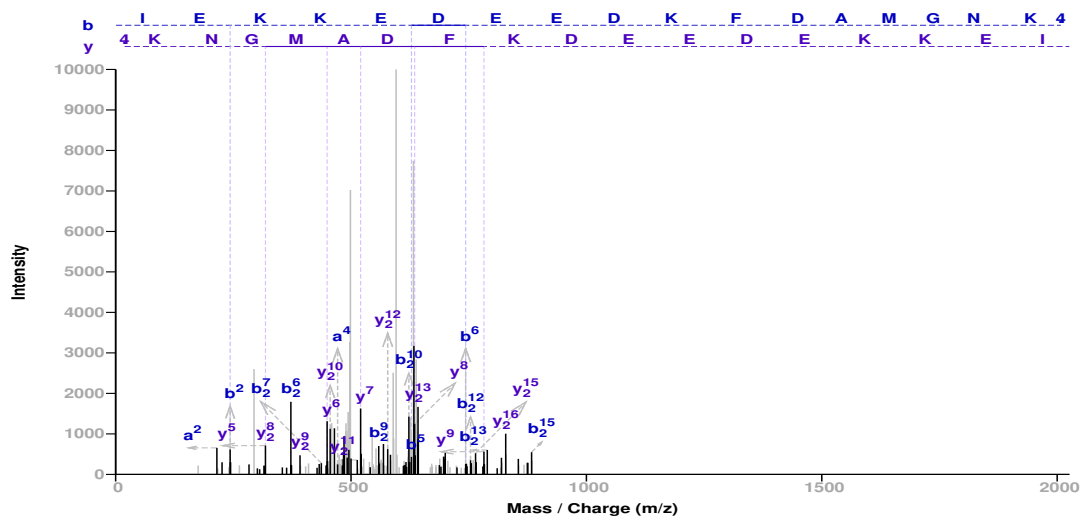

yeast00\_Scan\_Number\_5727 Precursor m/z: 633.337 cosine: 0.743  $\alpha$ : 0.348

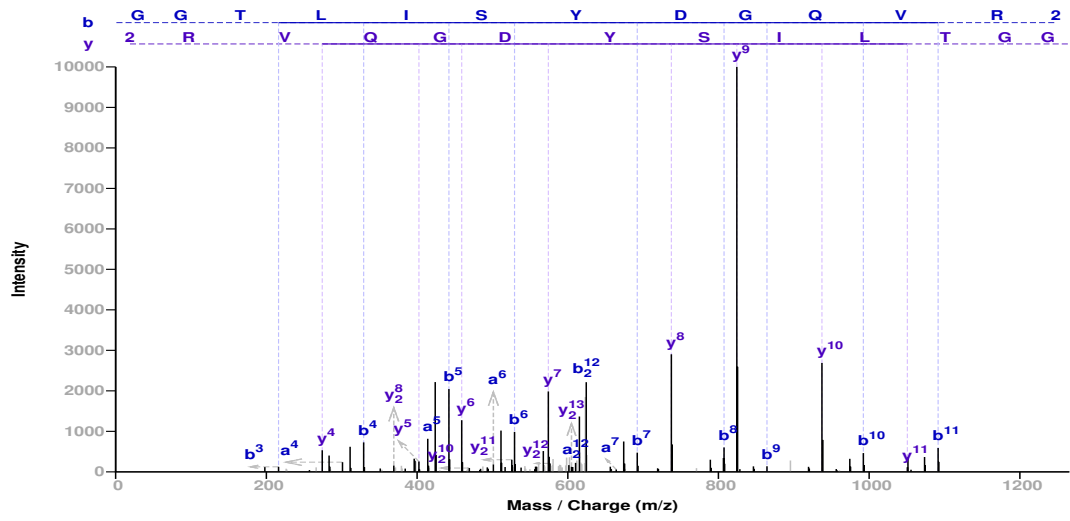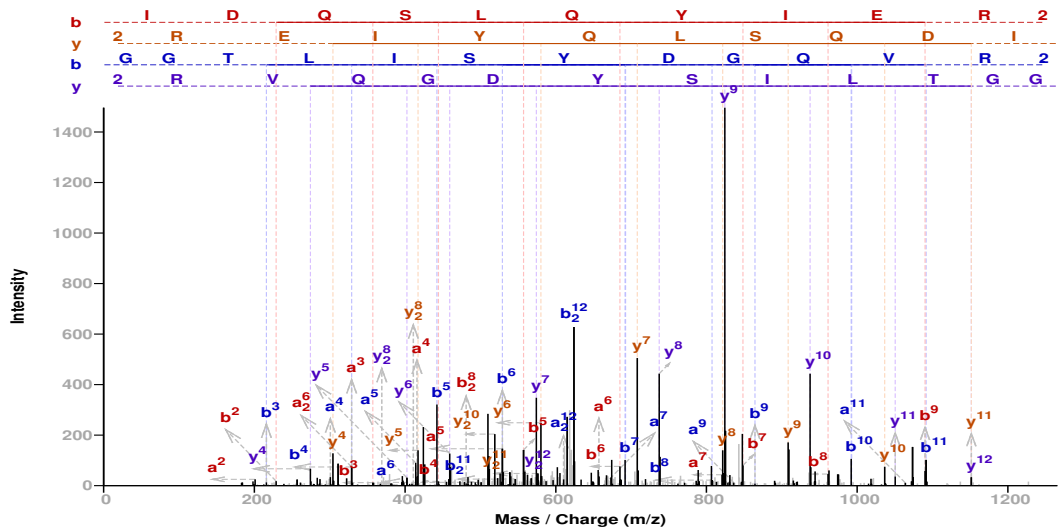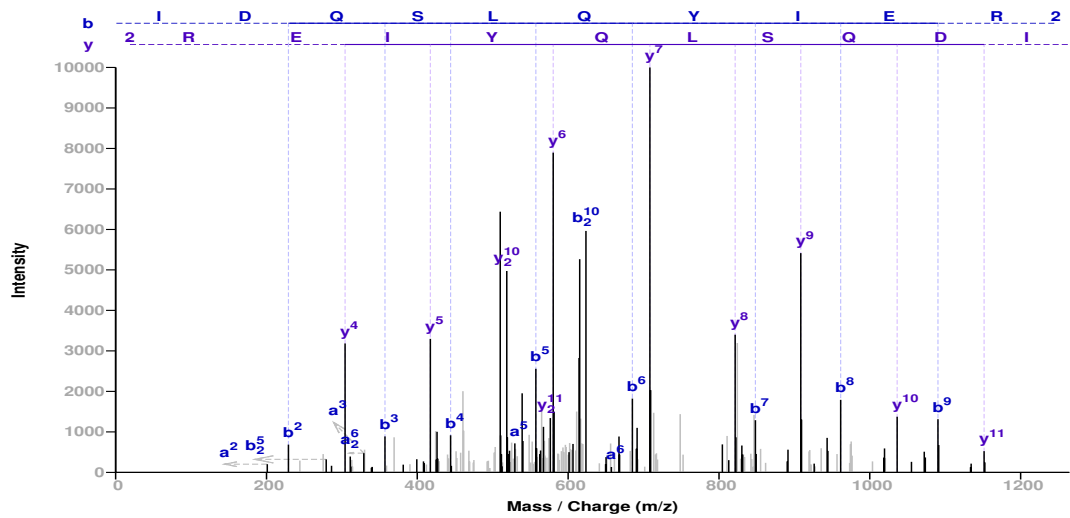



yeast00\_Scan\_Number\_3061 Precursor m/z: 520.262 cosine: 0.828  $\alpha$ : 0.345

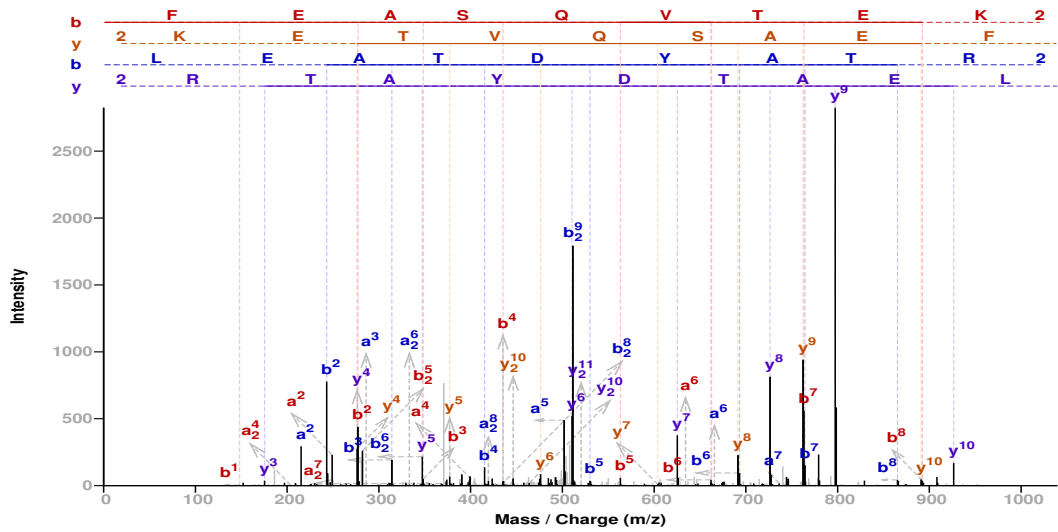

yeast00\_Scan\_Number\_2917 Precursor m/z: 404.227 cosine: 0.742  $\alpha$ : 0.344

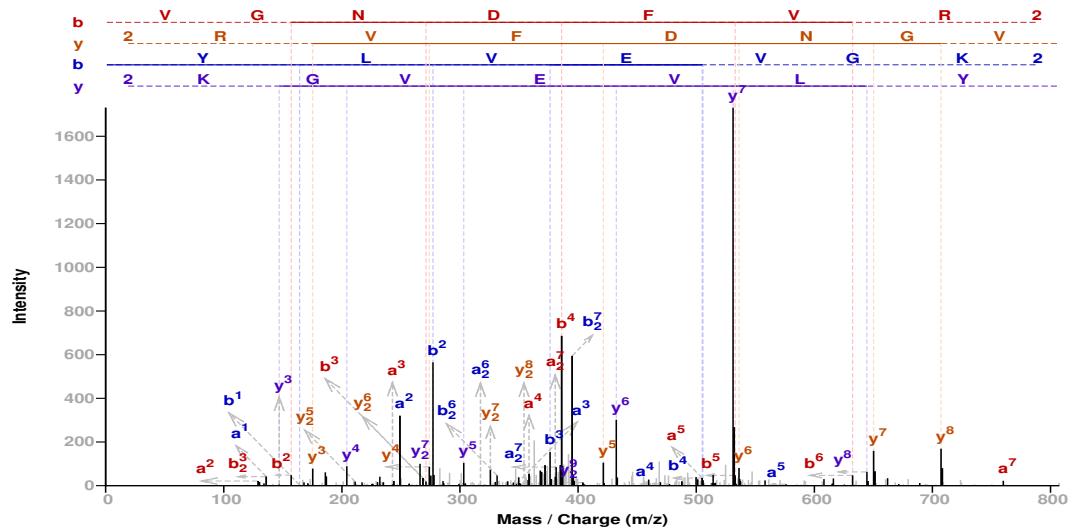

yeast00\_Scan\_Number\_1358 Precursor m/z: 400.883 cosine: 0.798  $\alpha$ : 0.341

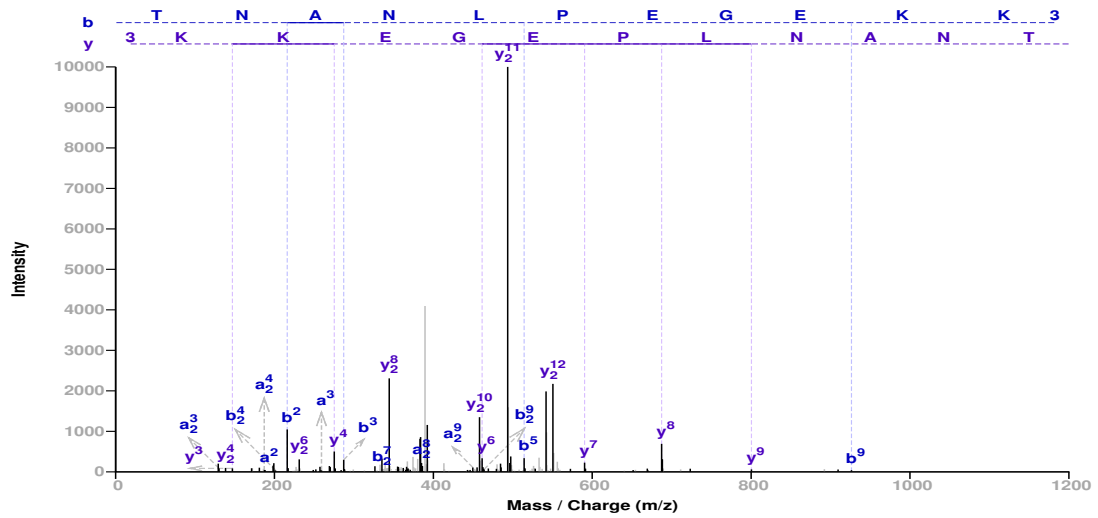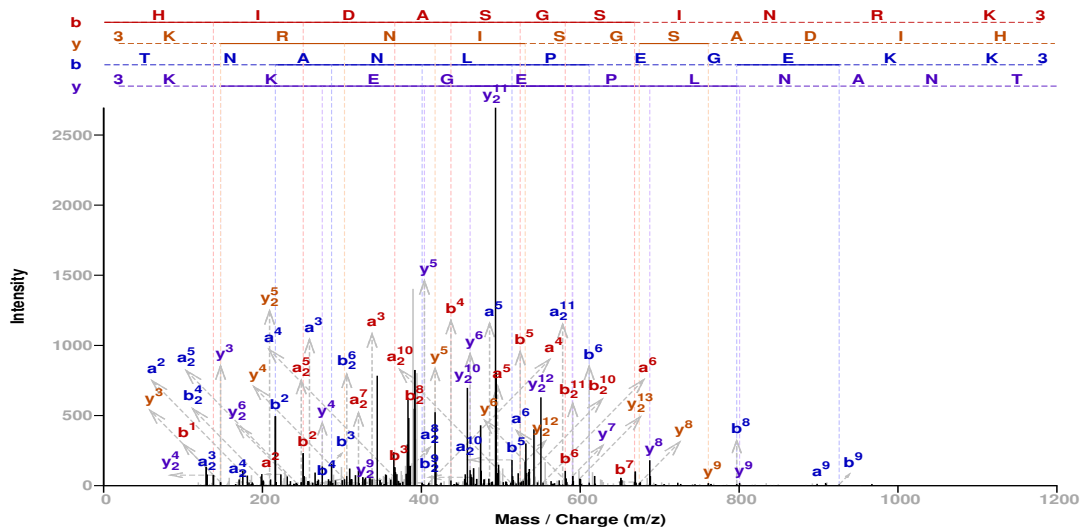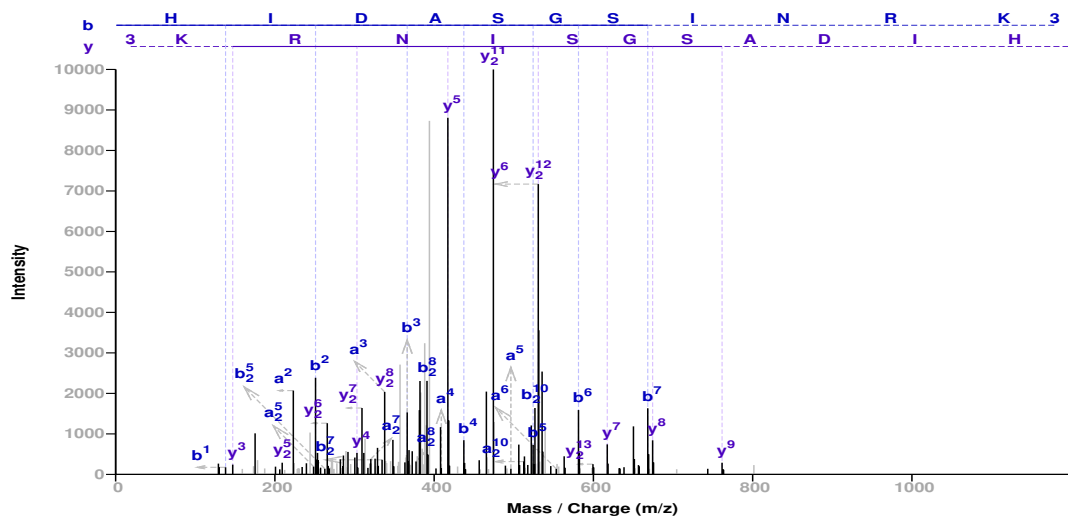

yeast00\_Scan\_Number\_6036 Precursor m/z: 772.720 cosine: 0.767  $\alpha$ : 0.333

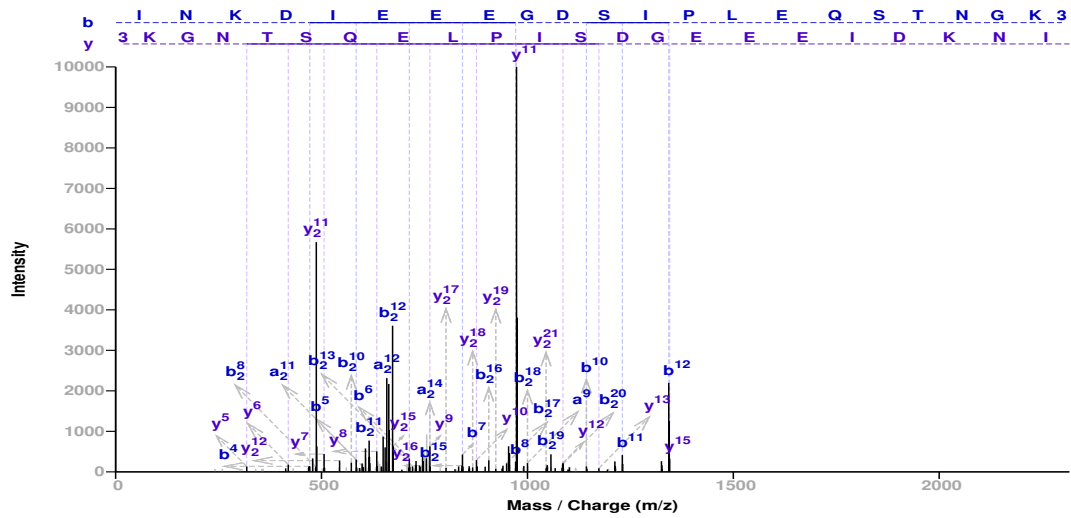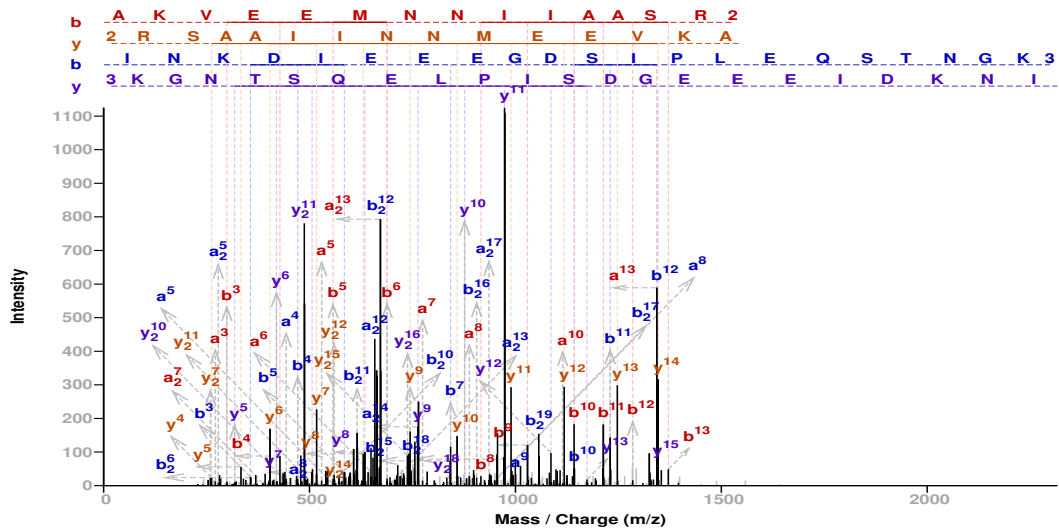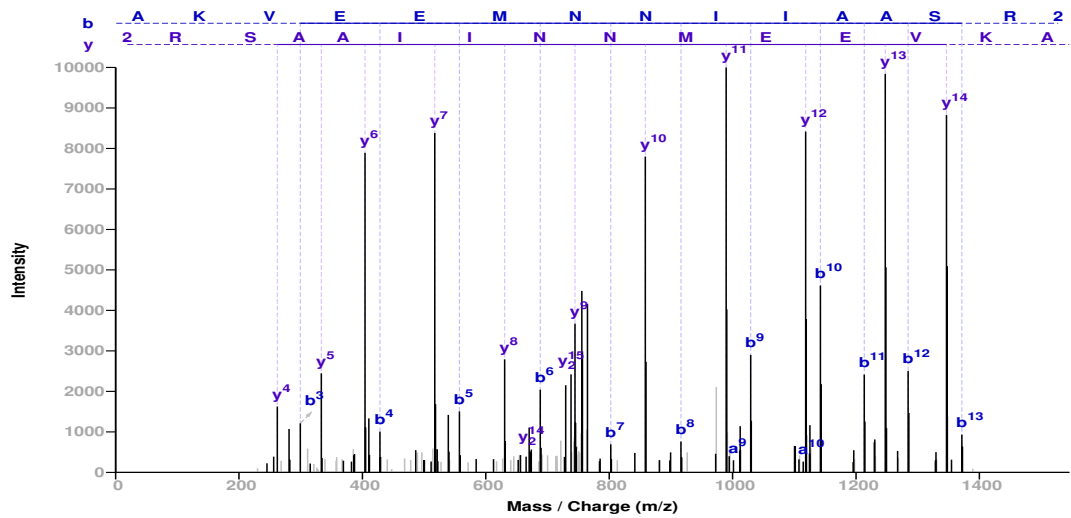

yeast00\_Scan\_Number\_8162 Precursor m/z: 608.361 cosine: 0.788  $\alpha$ : 0.332

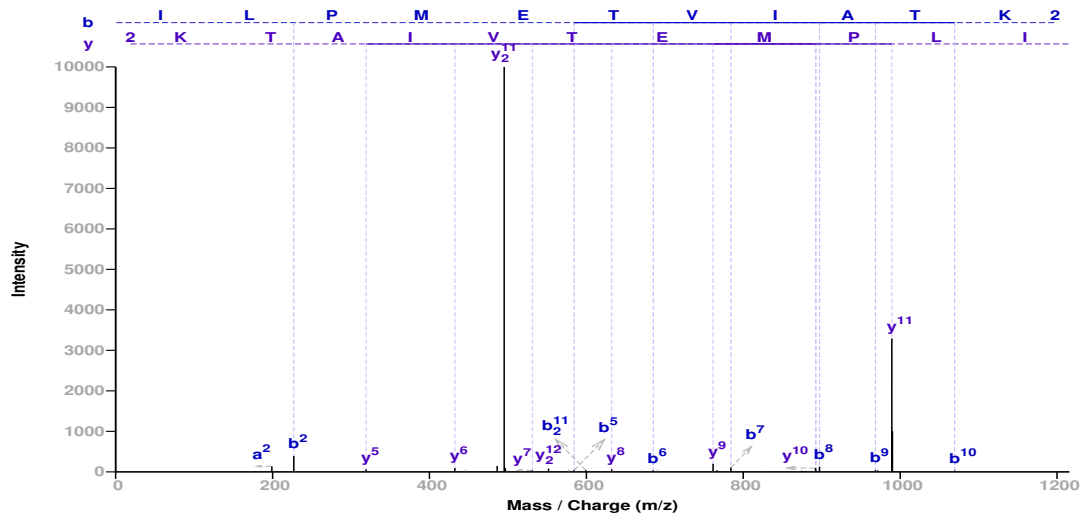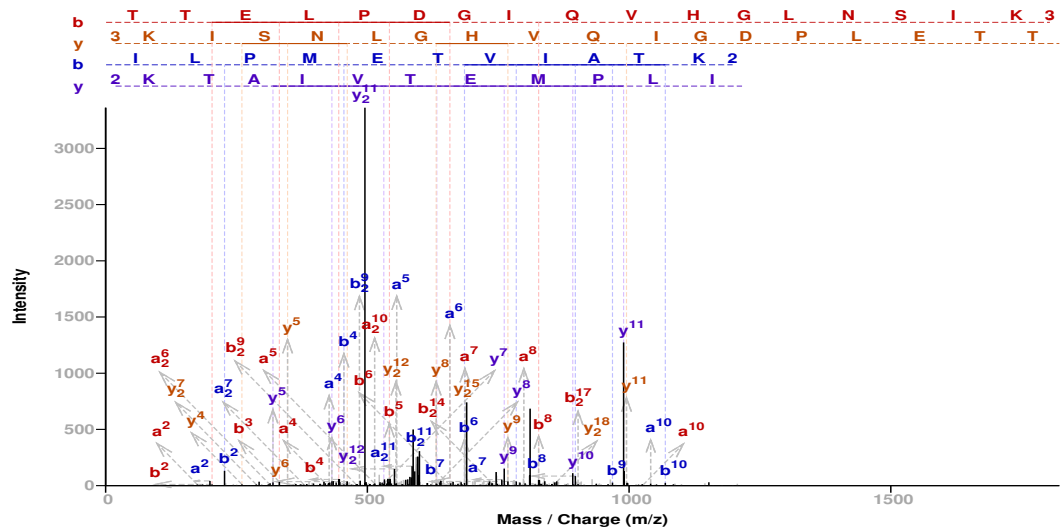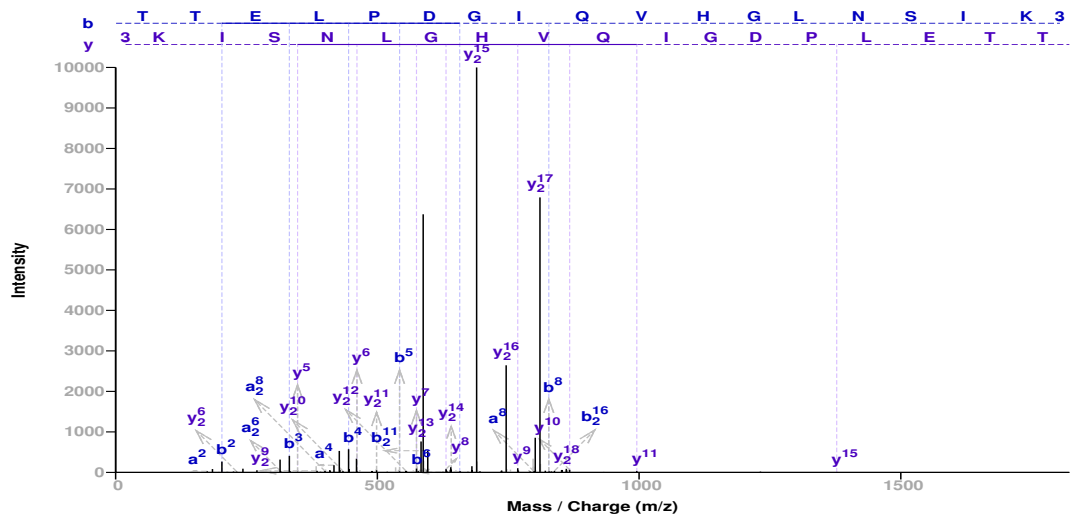



yeast00.Scan\_Number\_2918 Precursor m/z: 566.959 cosine: 0.857  $\alpha$ : 0.325

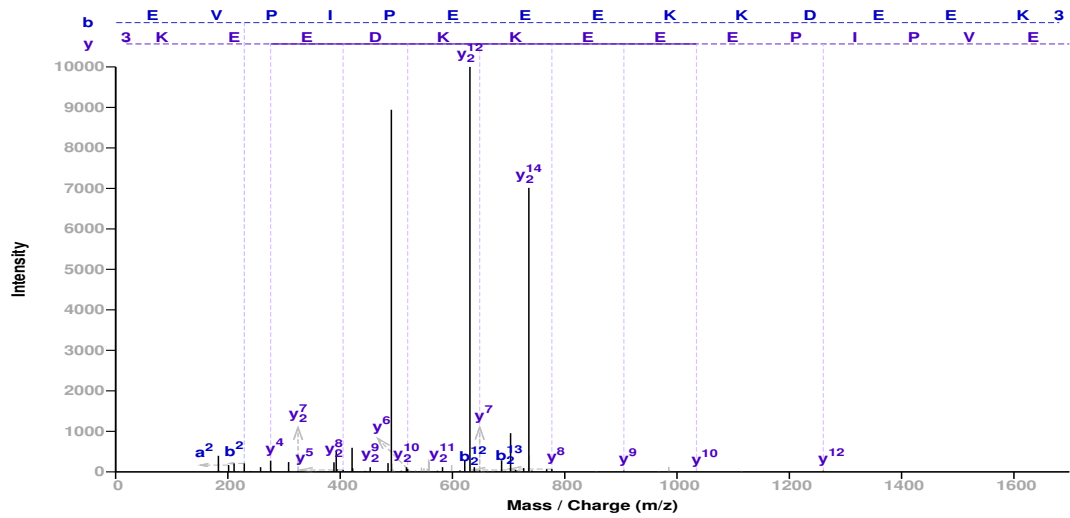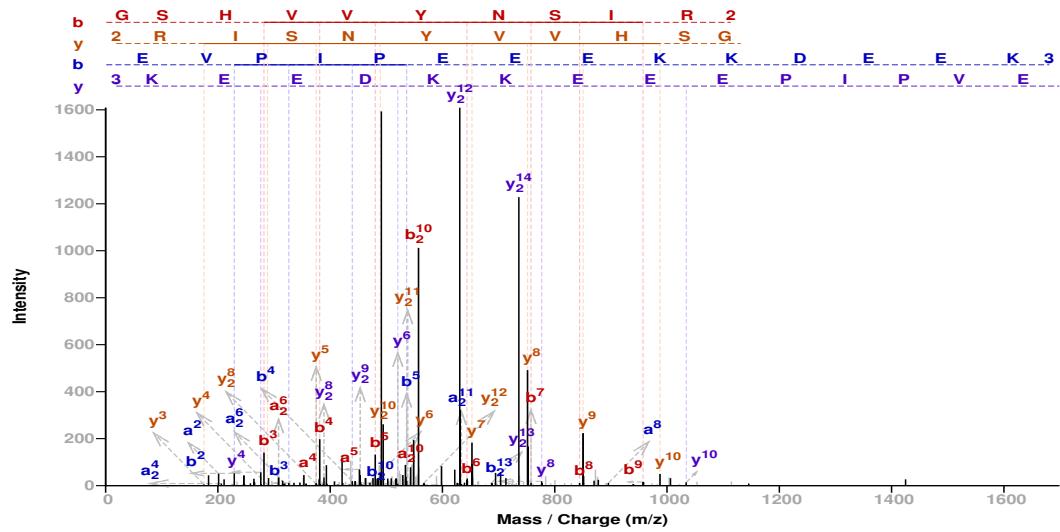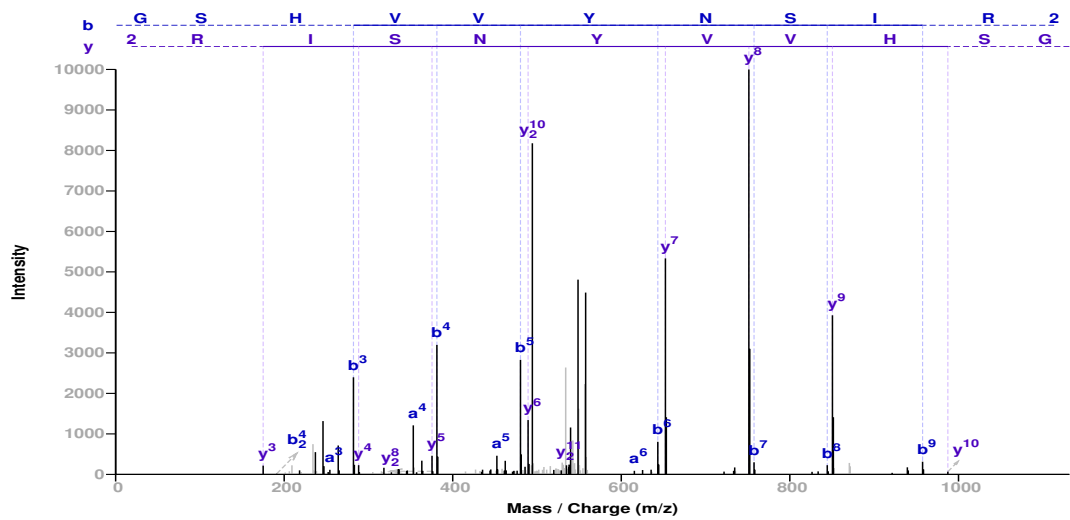





yeast00\_Scan\_Number\_8268 Precursor m/z: 740.387 cosine: 0.835  $\alpha$ : 0.321

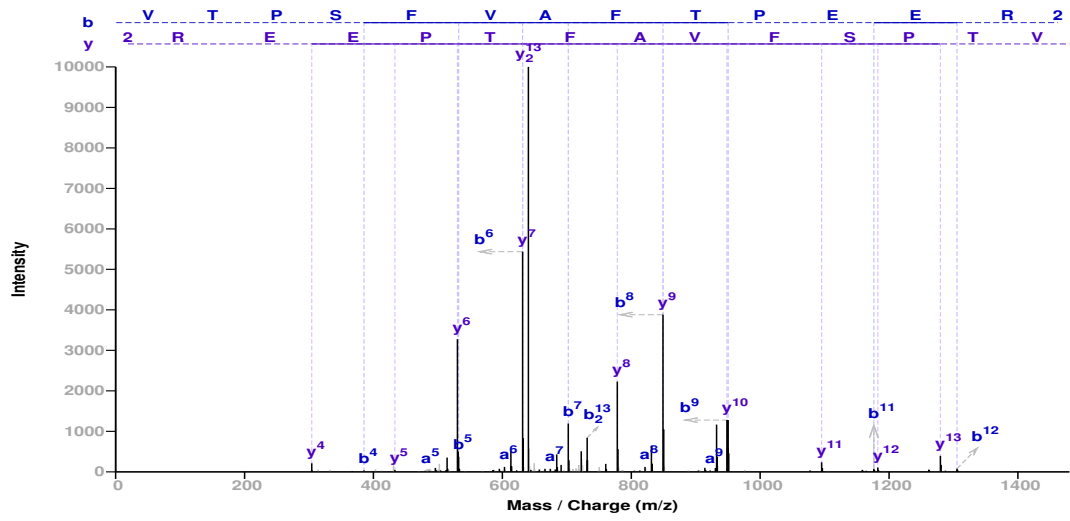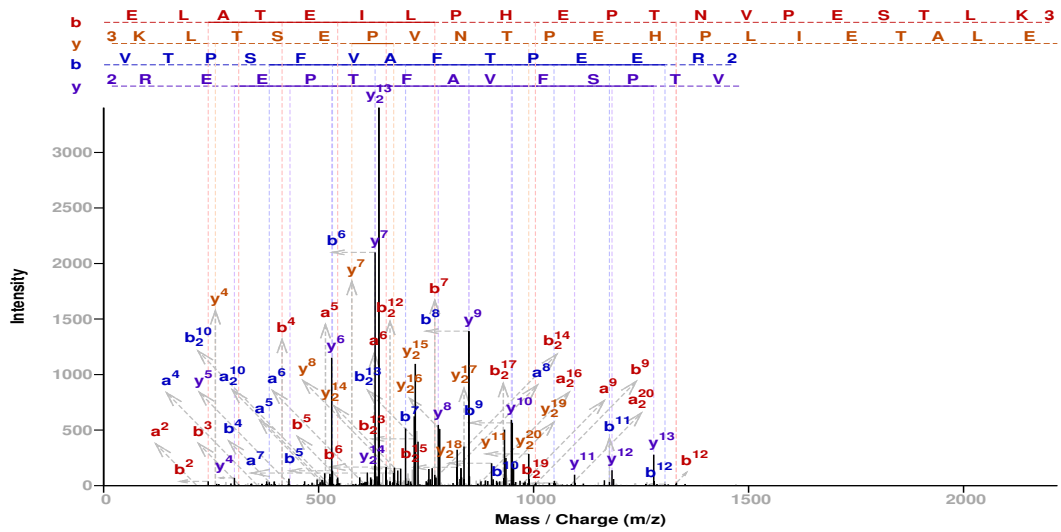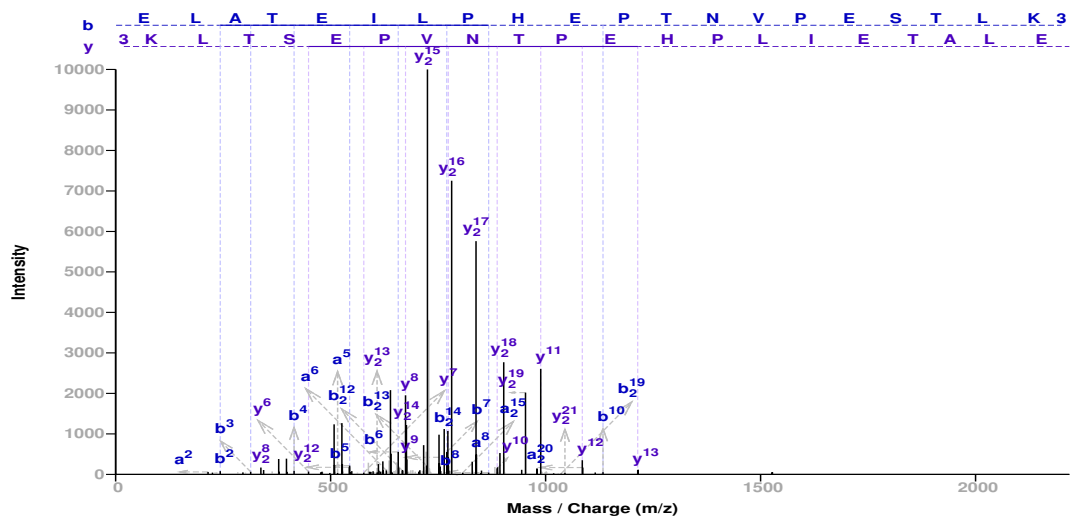

yeast00\_Scan\_Number\_5464 Precursor m/z: 581.802 cosine: 0.850  $\alpha$ : 0.319

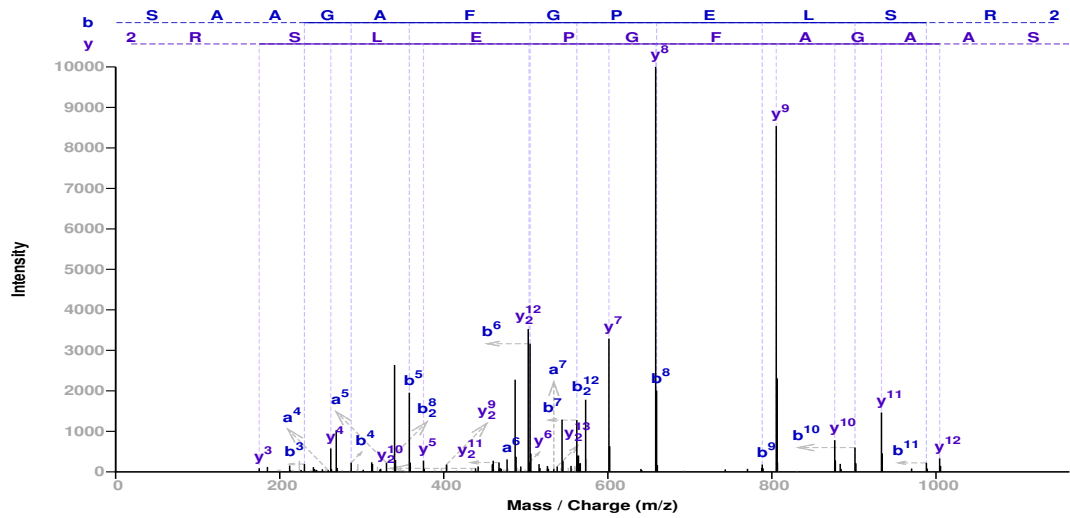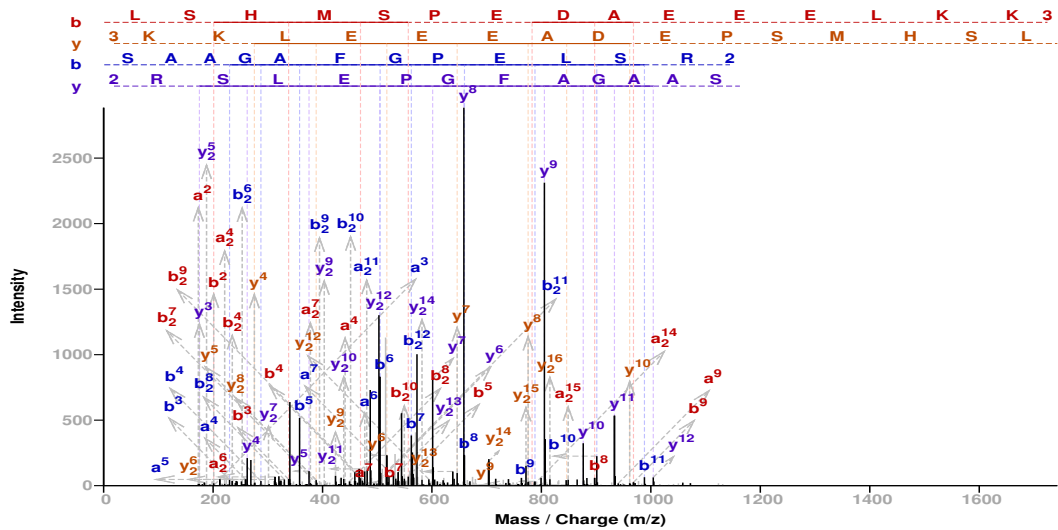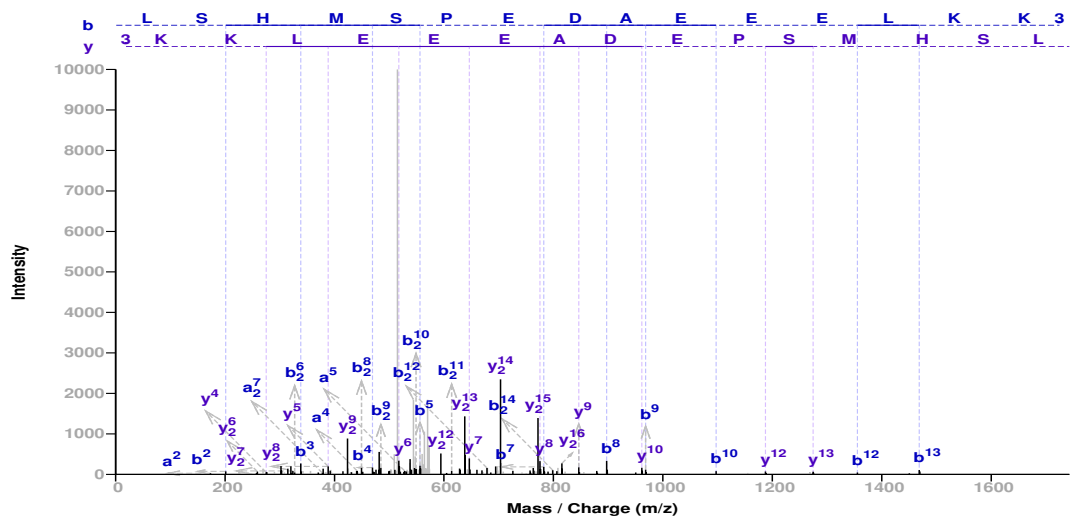

yeast00.Scan\_Number\_2710 Precursor m/z: 437.241 cosine: 0.796  $\alpha$ : 0.319

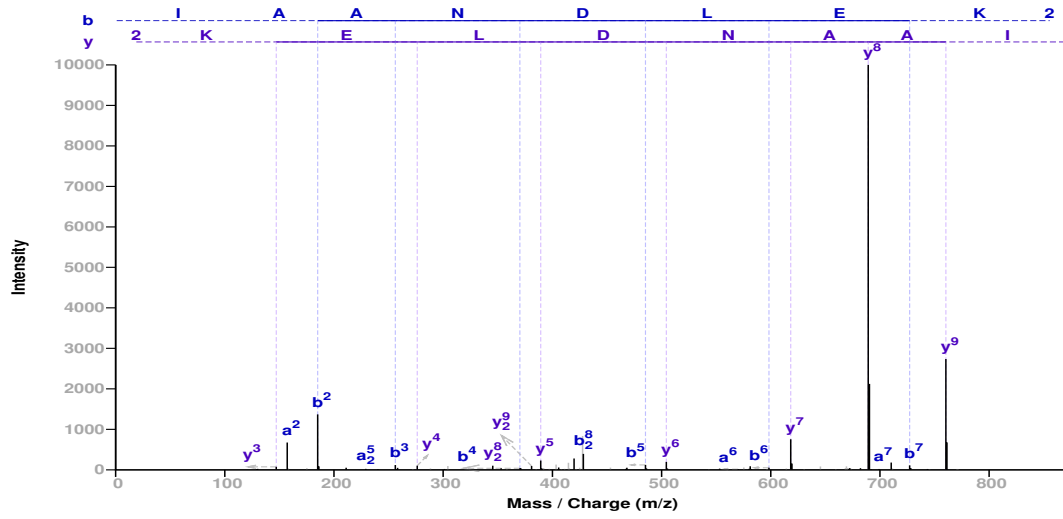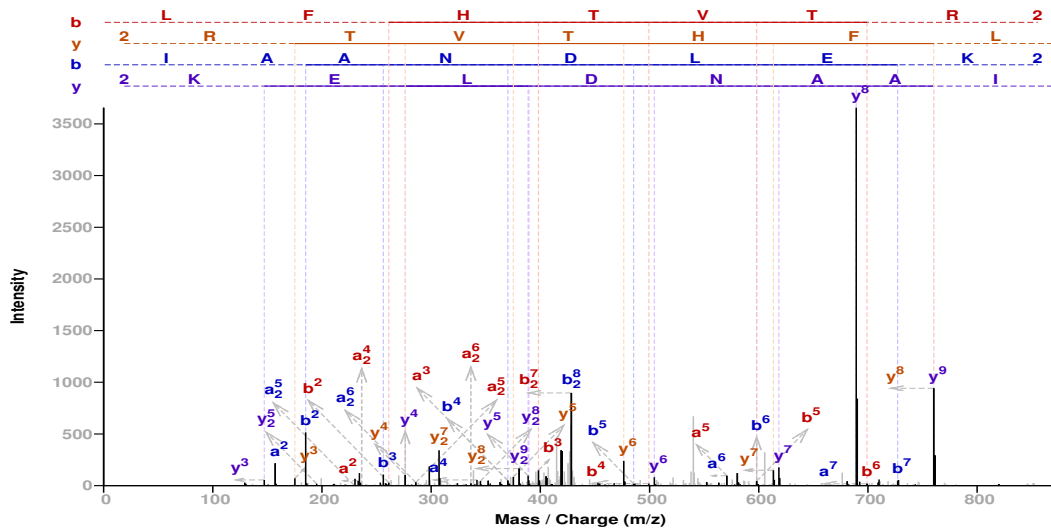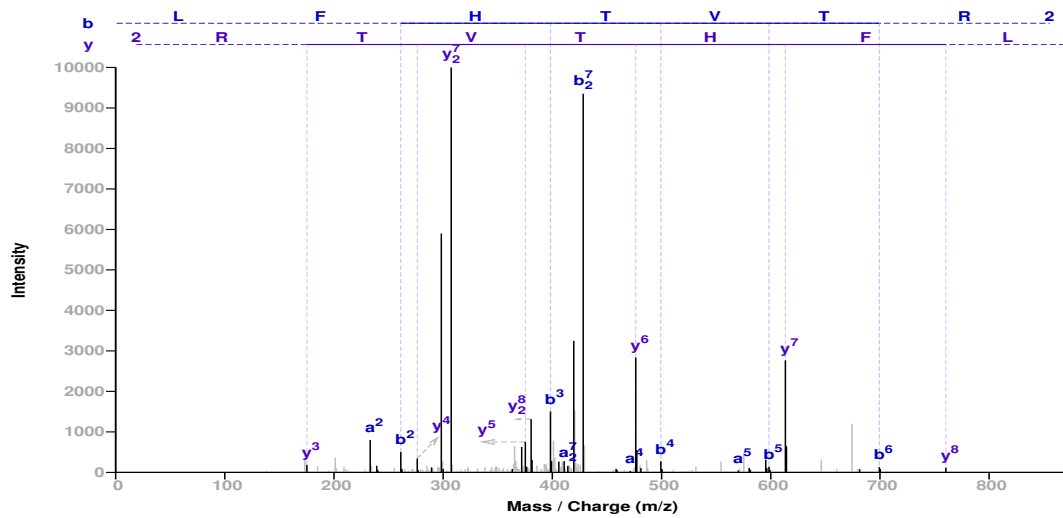

yeast00\_Scan\_Number\_5527 Precursor m/z: 435.304 cosine: 0.930  $\alpha$ : 0.318

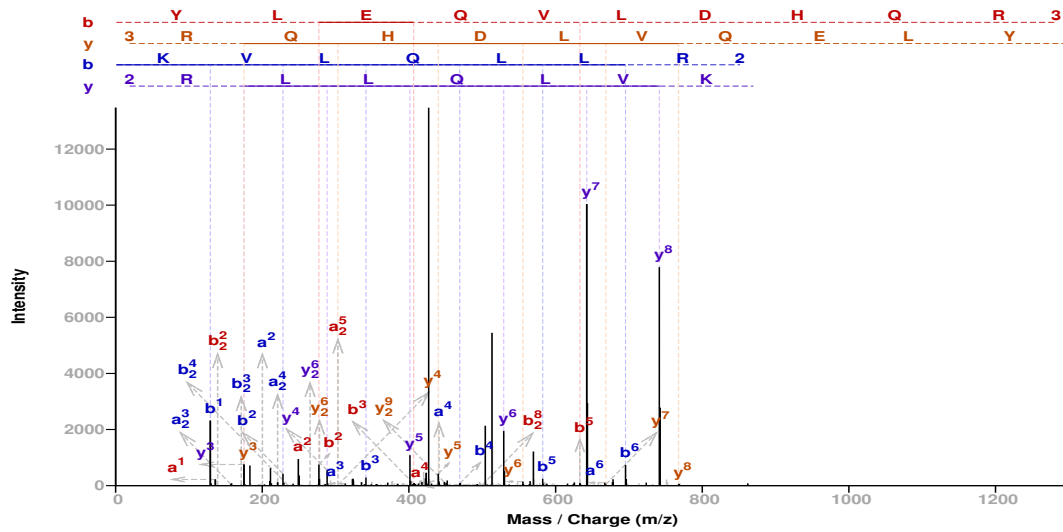

yeast00\_Scan\_Number\_5346 Precursor m/z: 355.201 cosine: 0.807  $\alpha$ : 0.315

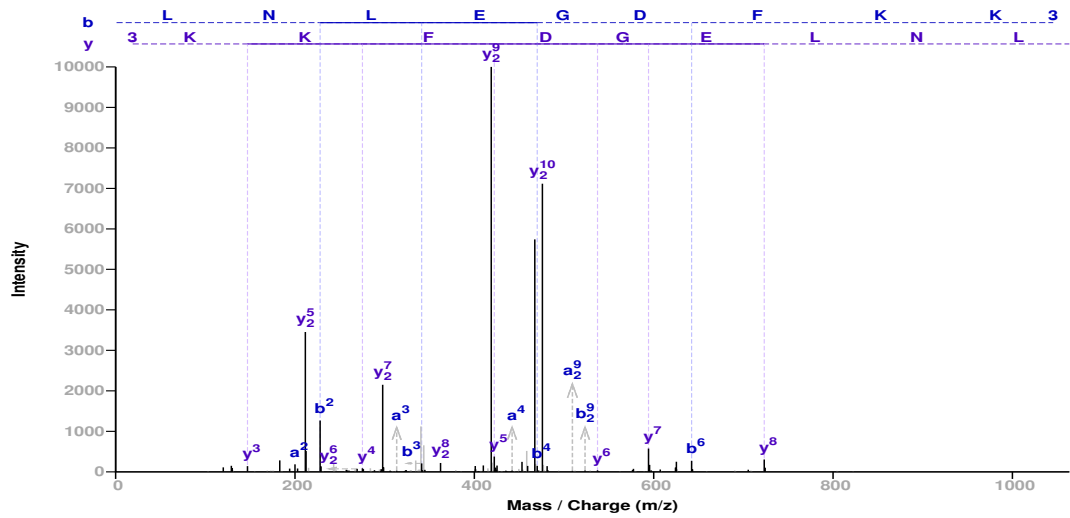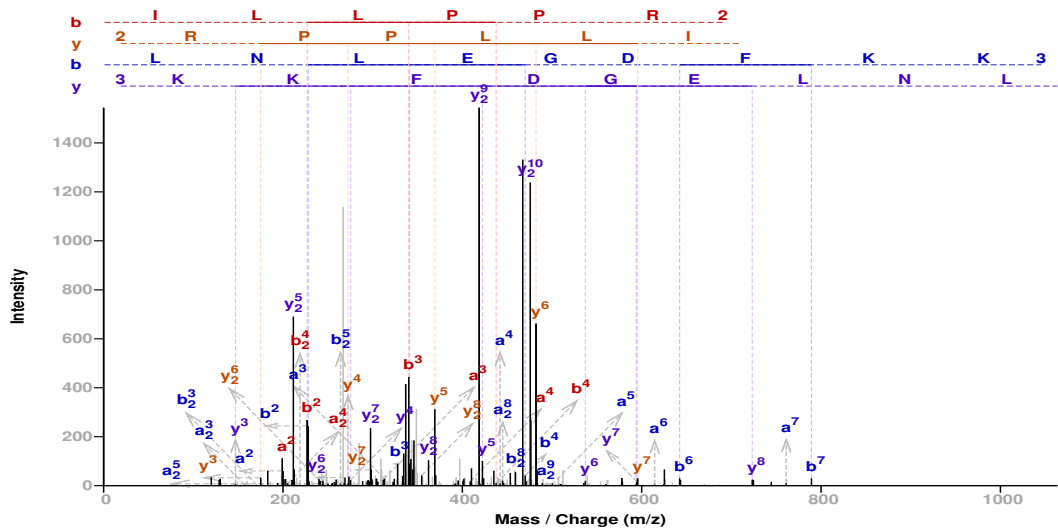

yeast00.Scan\_Number\_2174 Precursor m/z: 506.734 cosine: 0.771  $\alpha$ : 0.314

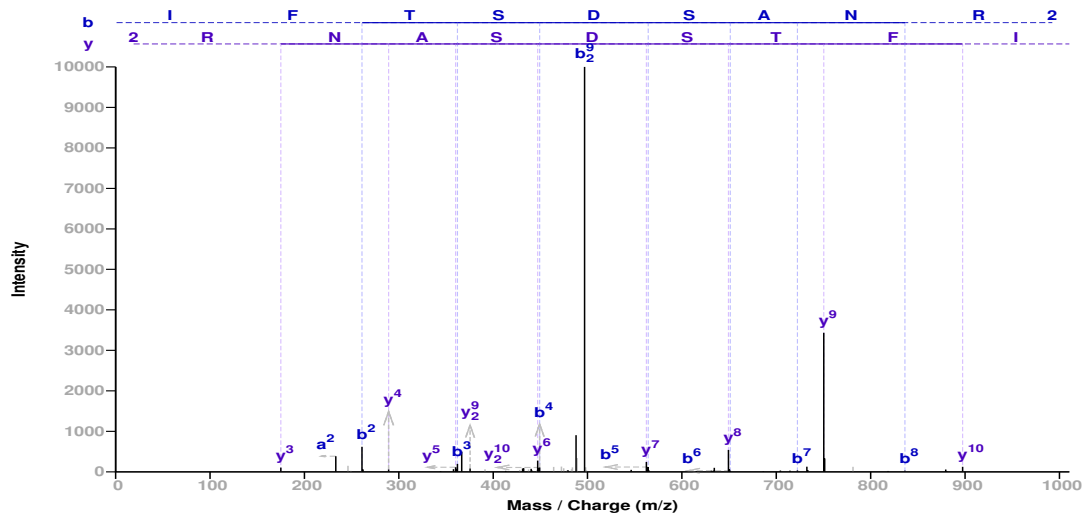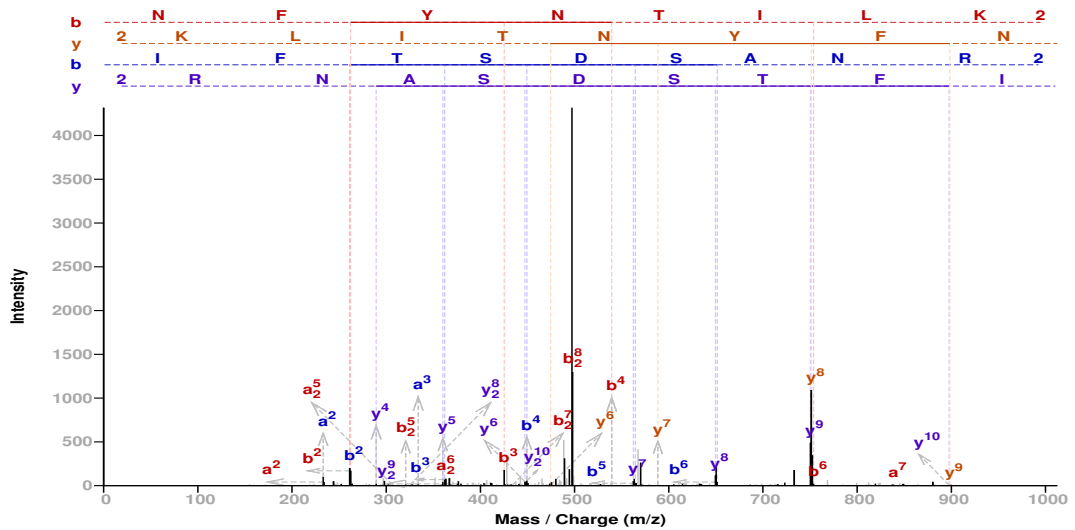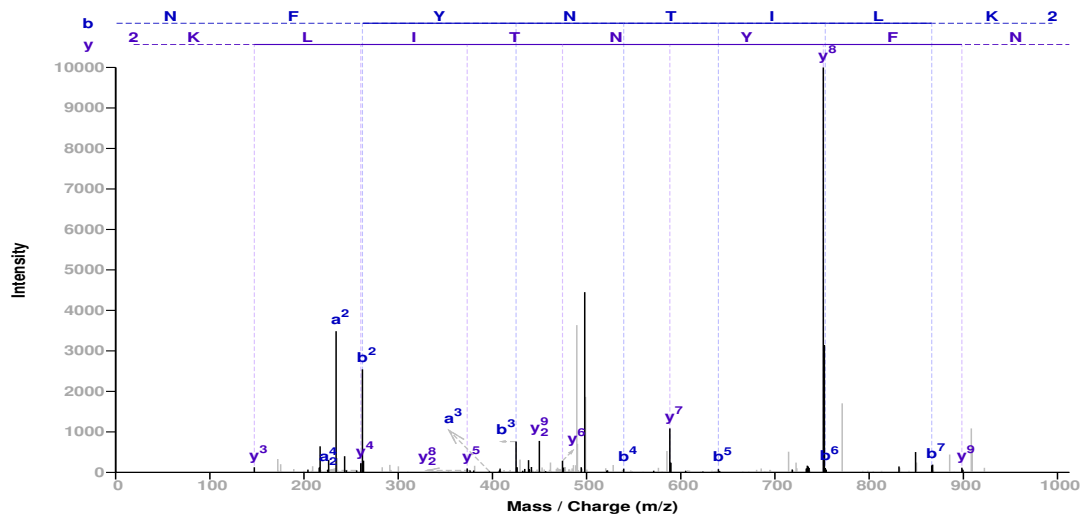

yeast00\_Scan\_Number\_523 Precursor m/z: 474.727 cosine: 0.785  $\alpha$ : 0.309

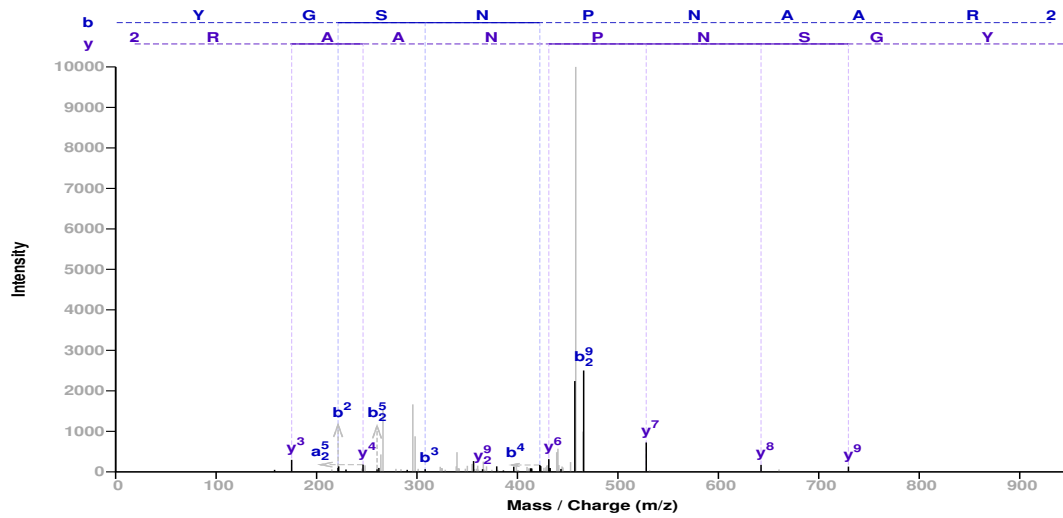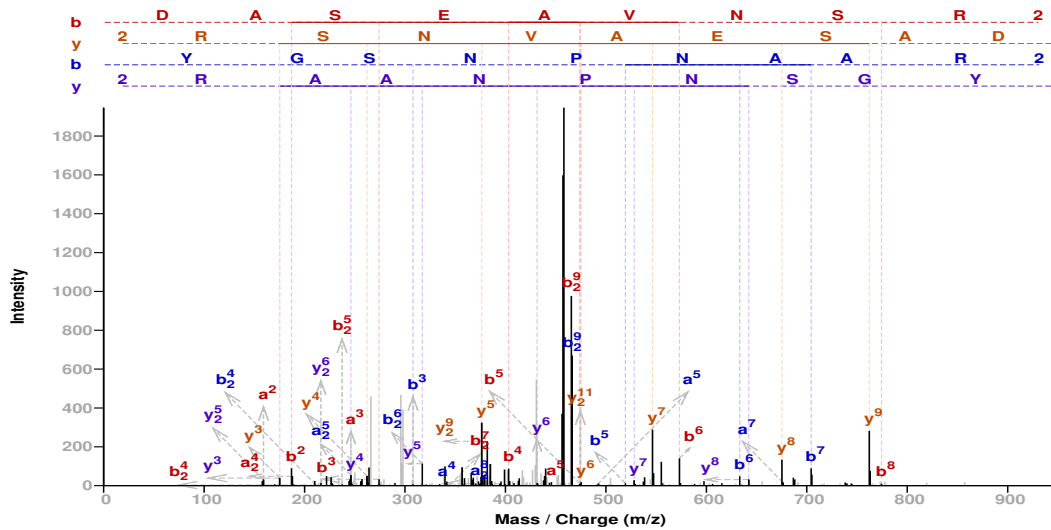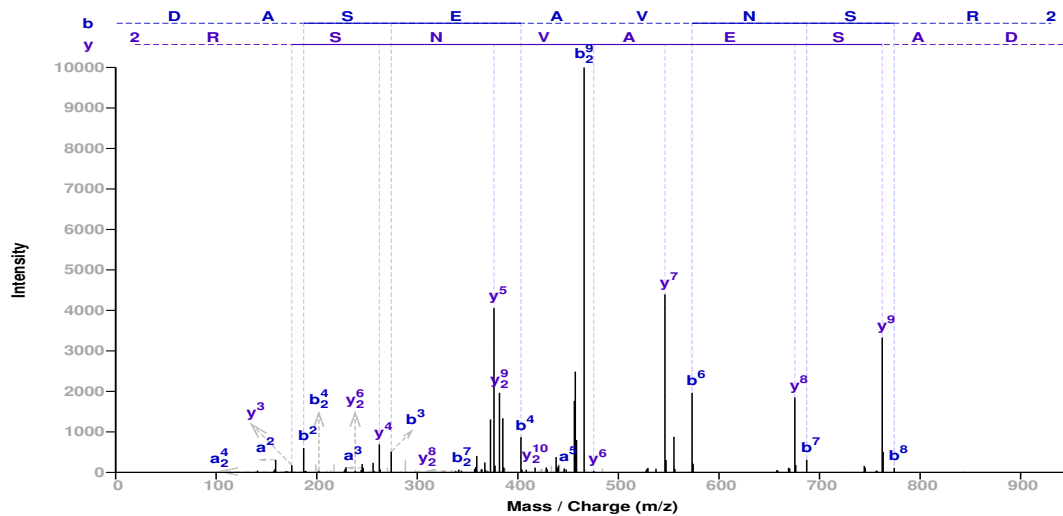

yeast00\_Scan\_Number\_1822 Precursor m/z: 407.223 cosine: 0.891  $\alpha$ : 0.308

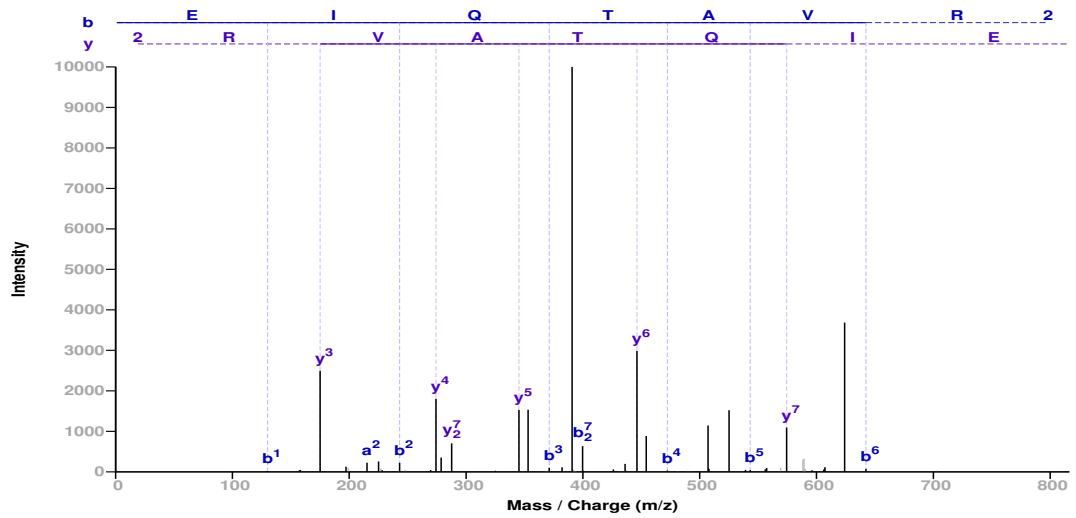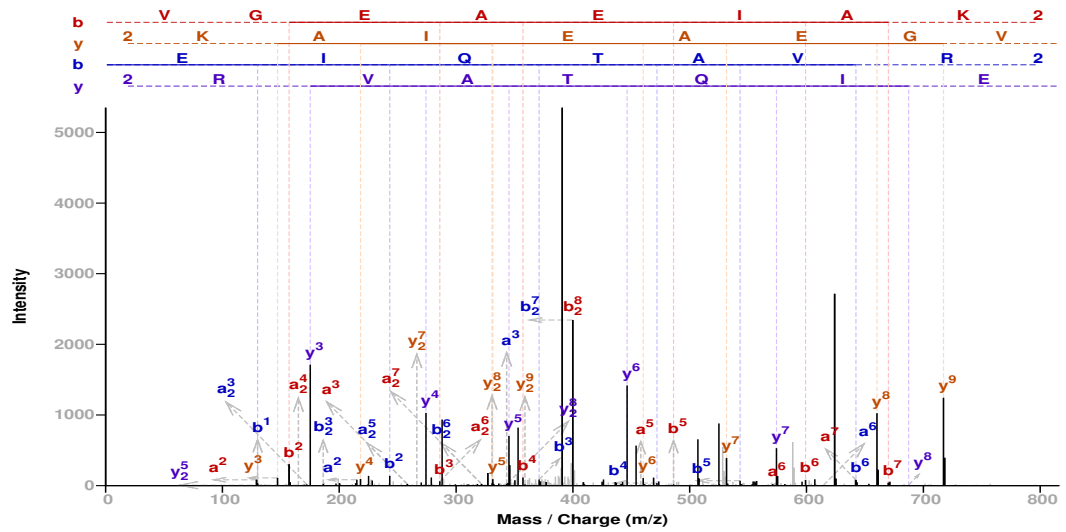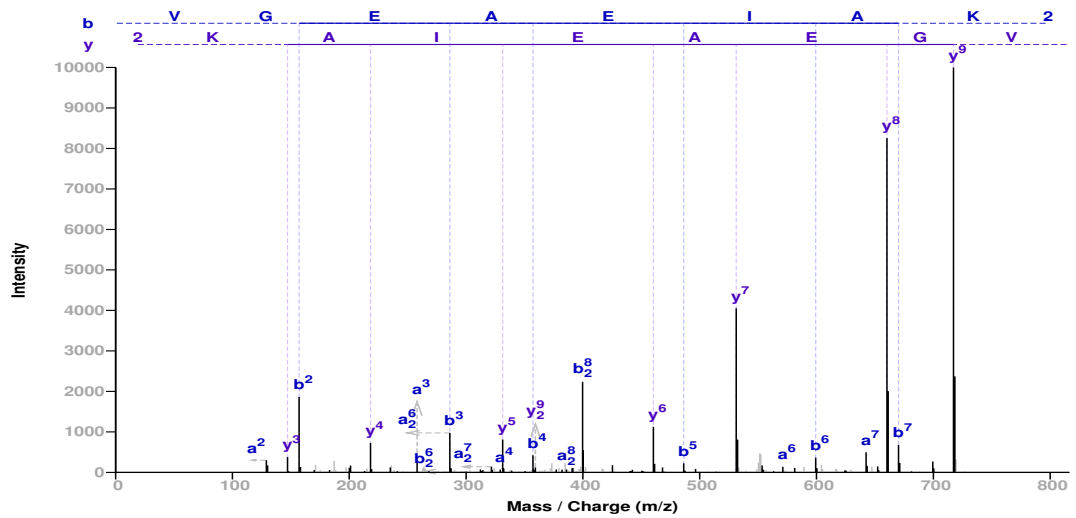



yeast00\_Scan\_Number\_3958 Precursor m/z: 400.548 cosine: 0.843  $\alpha$ : 0.308

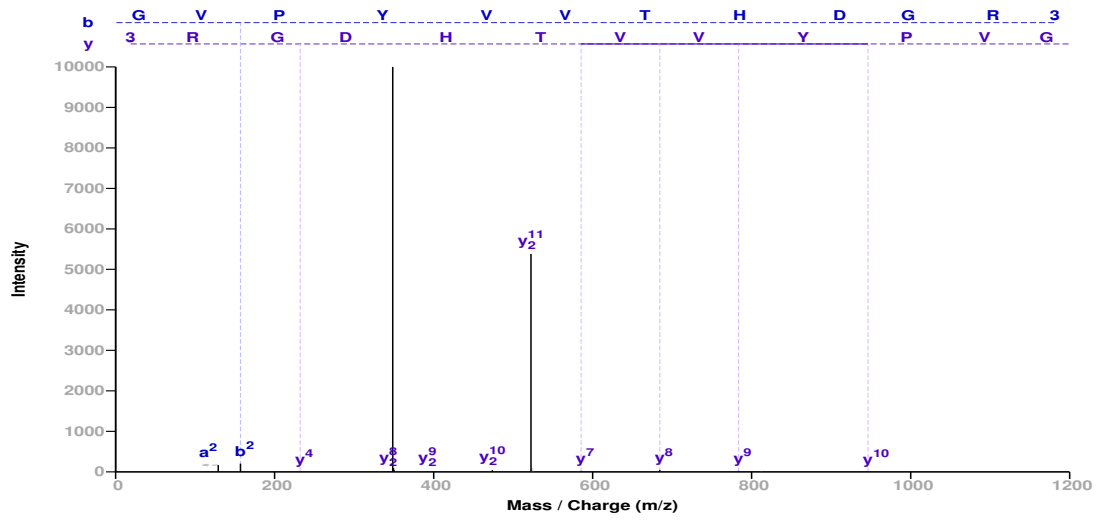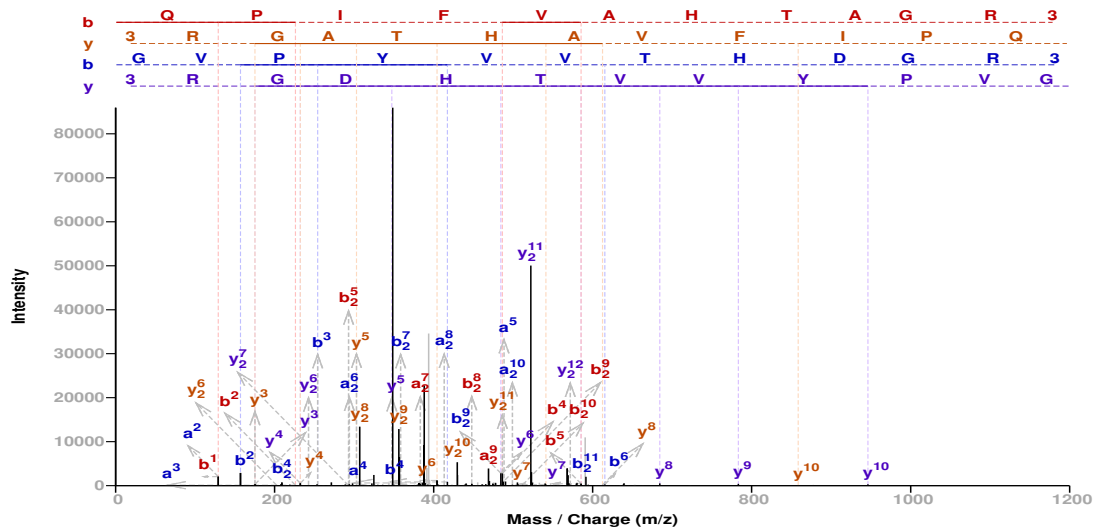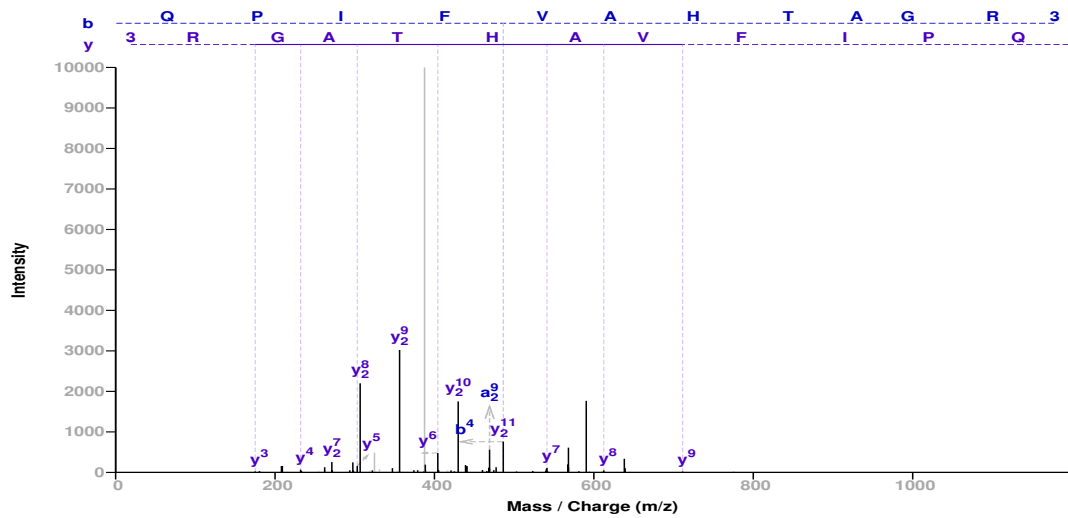

yeast00\_Scan\_Number\_5038 Precursor m/z: 415.742 cosine: 0.843  $\alpha$ : 0.305

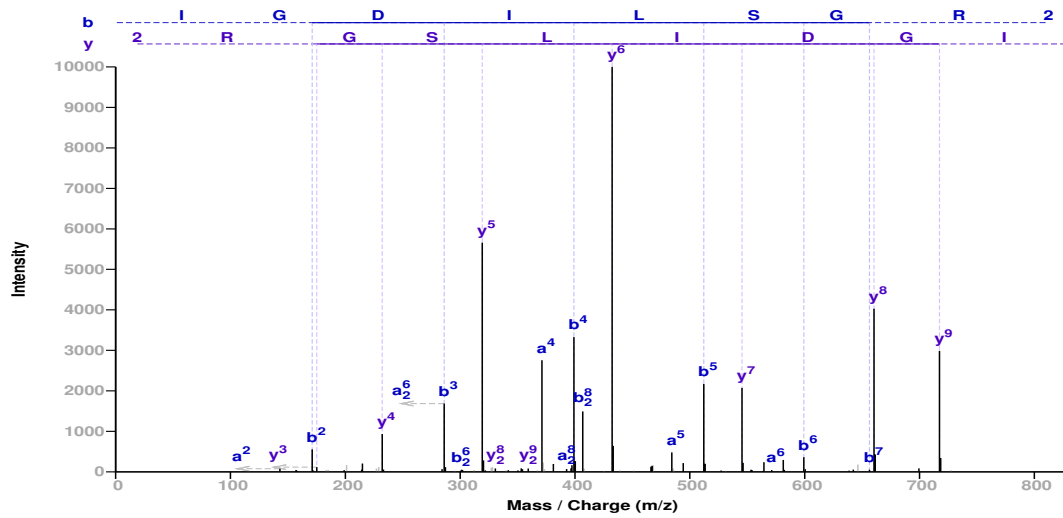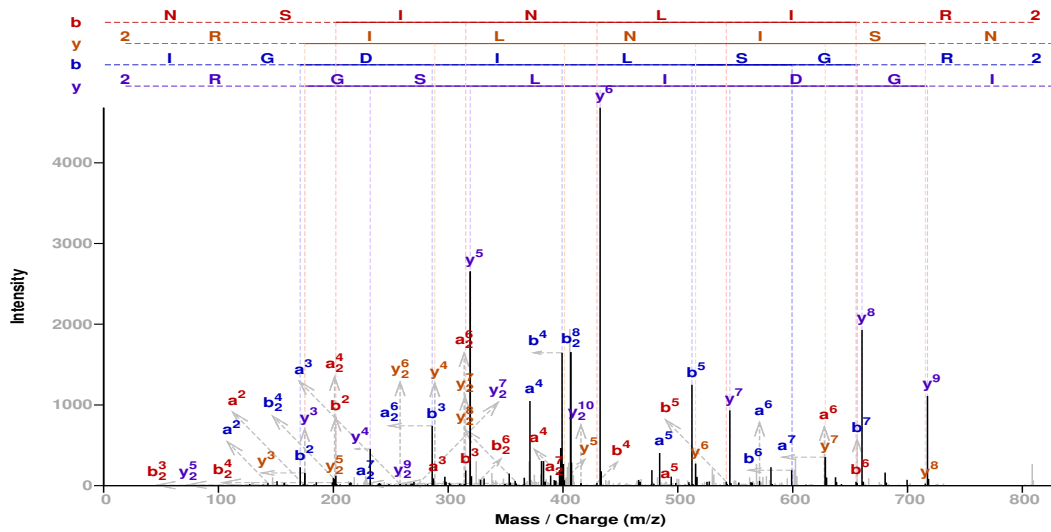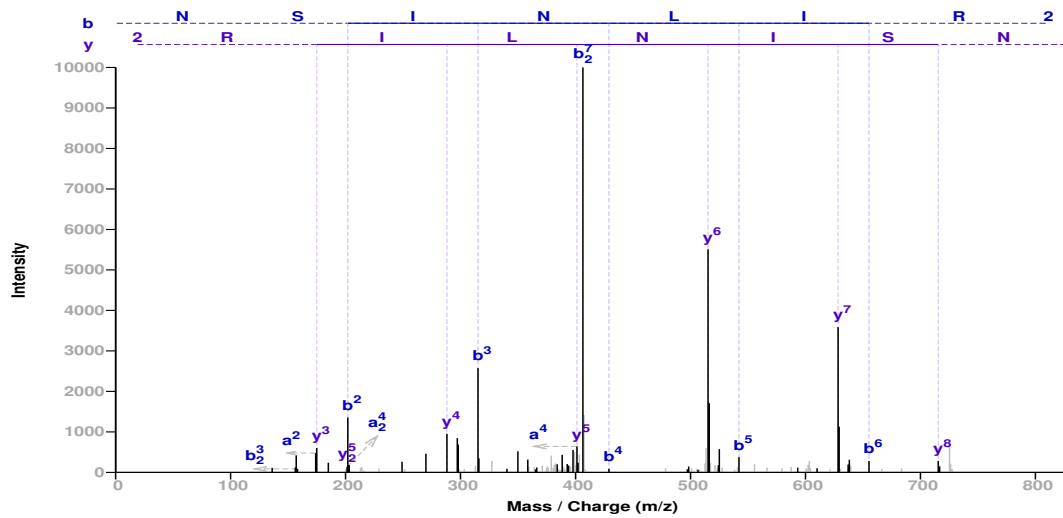

yeast00\_Scan\_Number\_575 Precursor m/z: 452.723 cosine: 0.775  $\alpha$ : 0.301

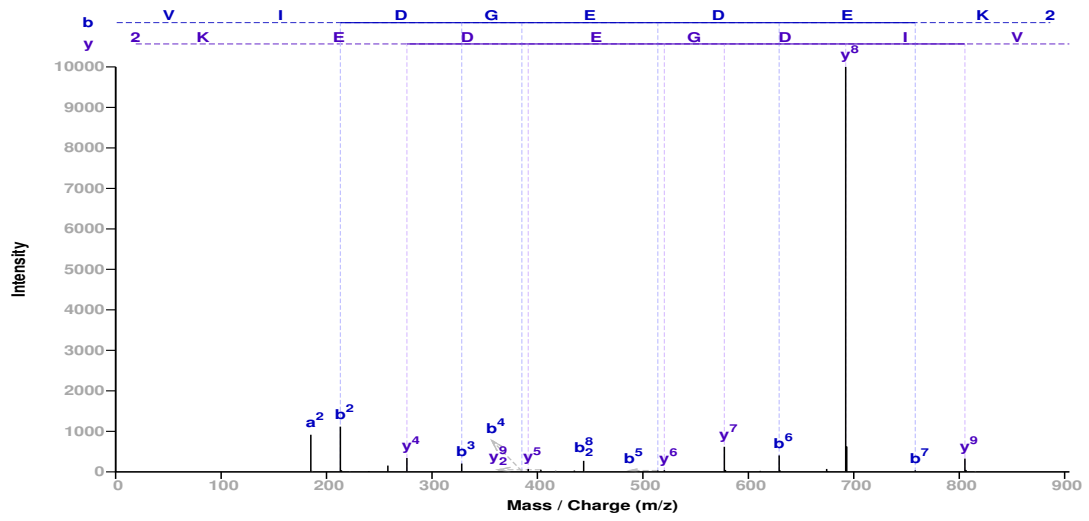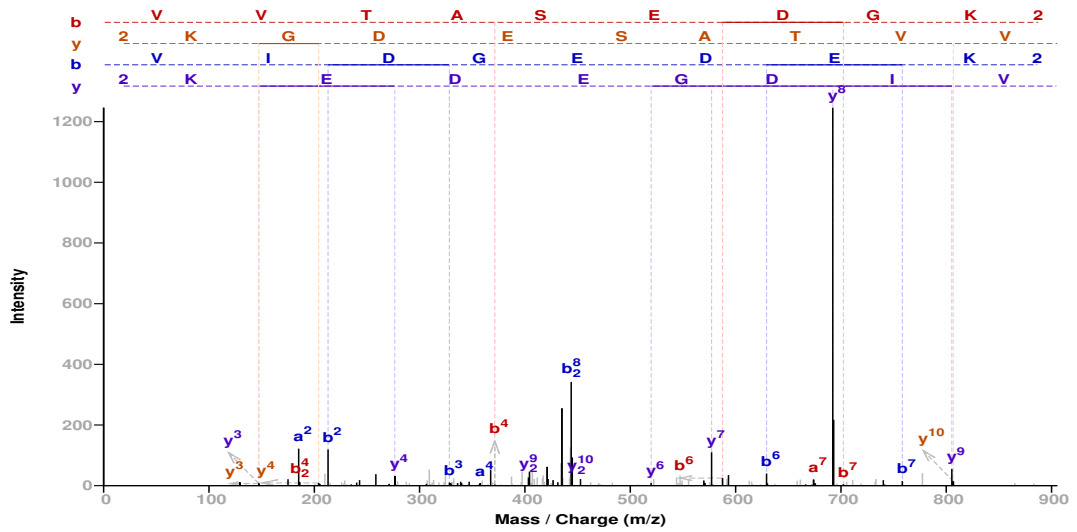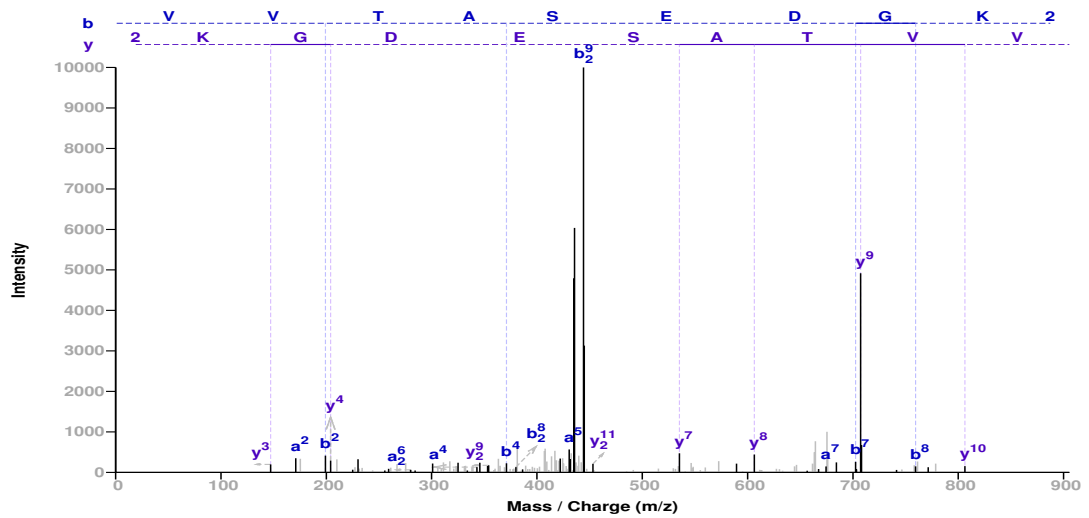

yeast00\_Scan\_Number\_6649 Precursor m/z: 374.889 cosine: 0.841  $\alpha$ : 0.301

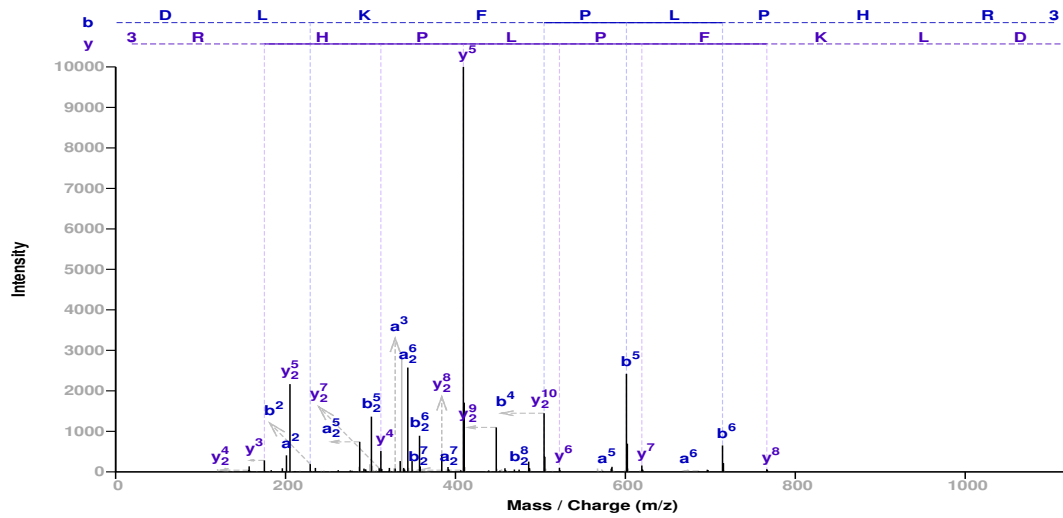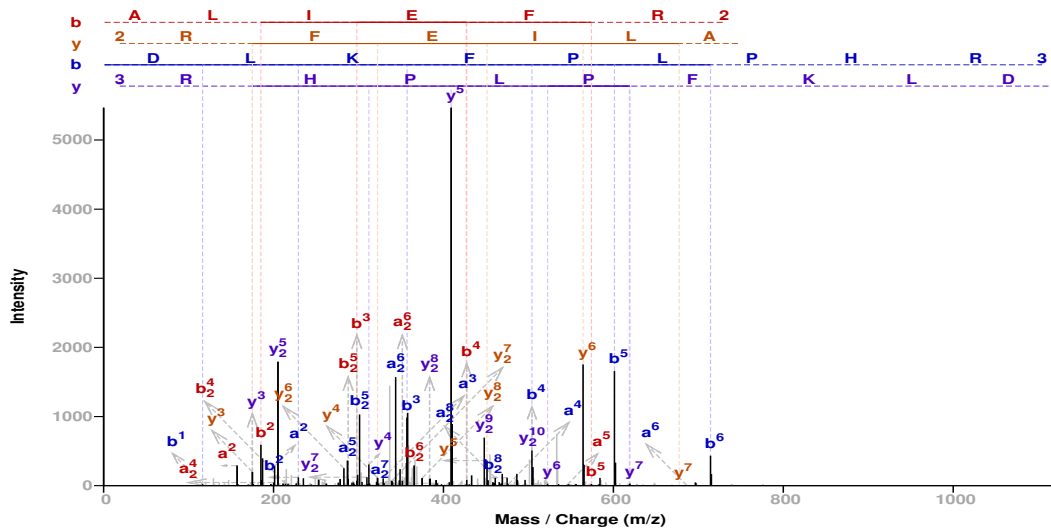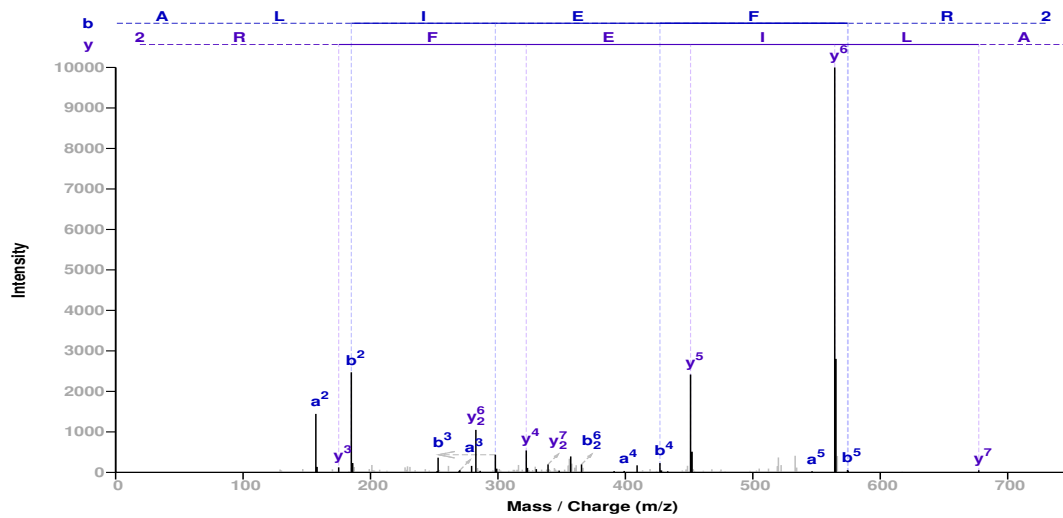

yeast00\_Scan\_Number\_3890 Precursor m/z: 396.873 cosine: 0.813  $\alpha$ : 0.298

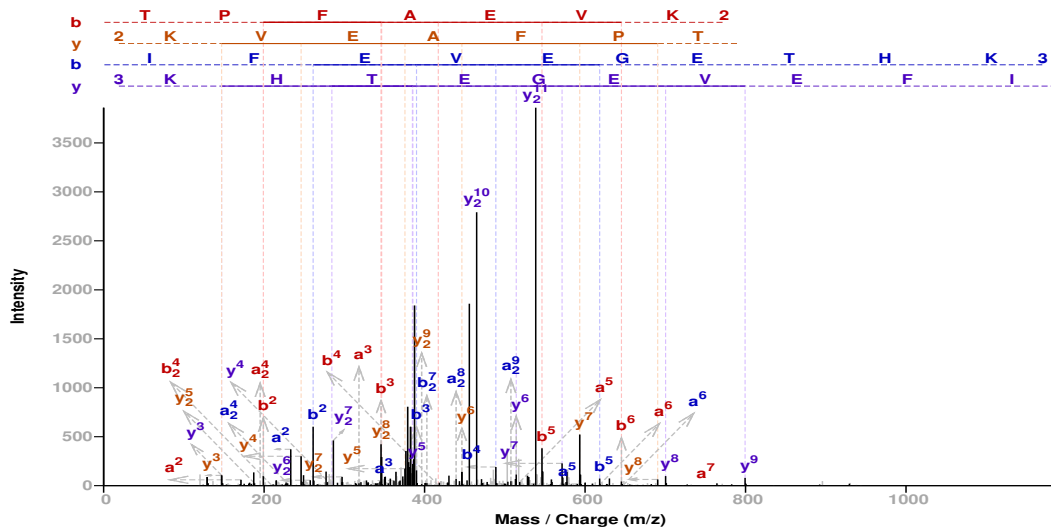

yeast00\_Scan\_Number\_7072 Precursor m/z: 529.279 cosine: 0.817  $\alpha$ : 0.297

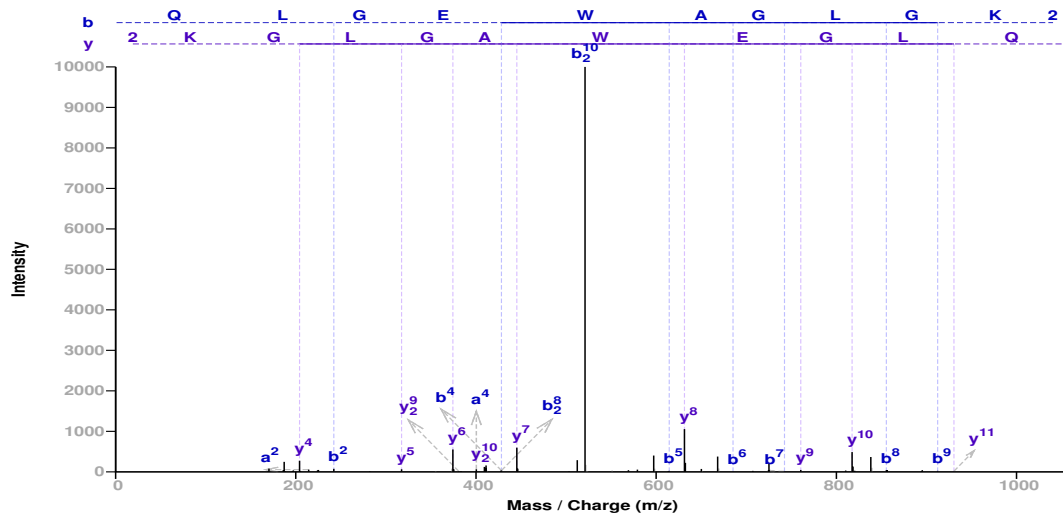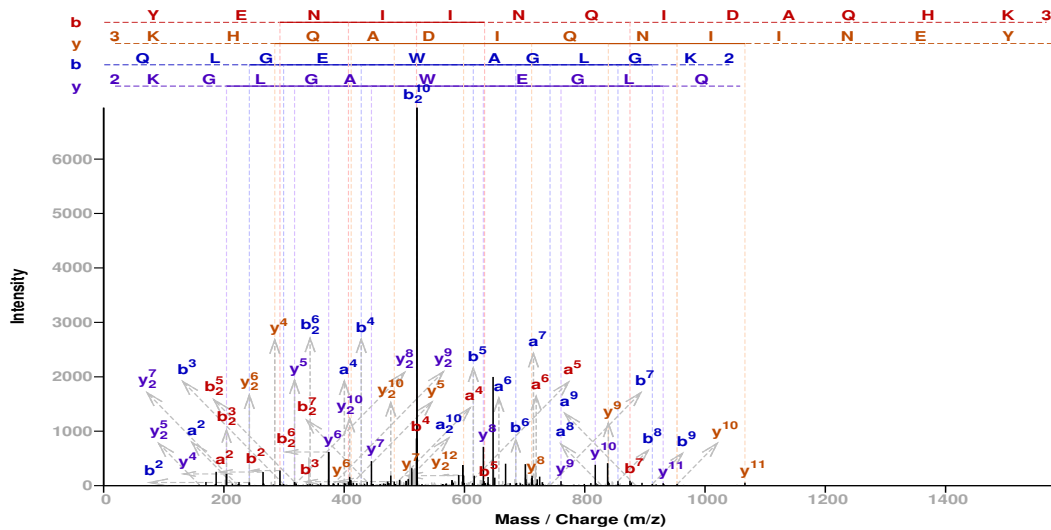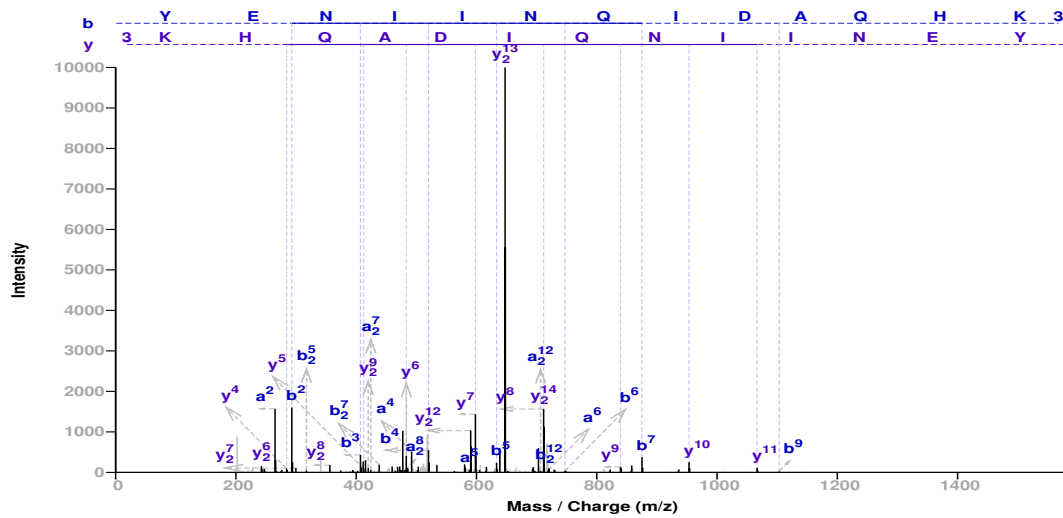

yeast00.Scan\_Number\_2719 Precursor m/z: 417.563 cosine: 0.814  $\alpha$ : 0.293

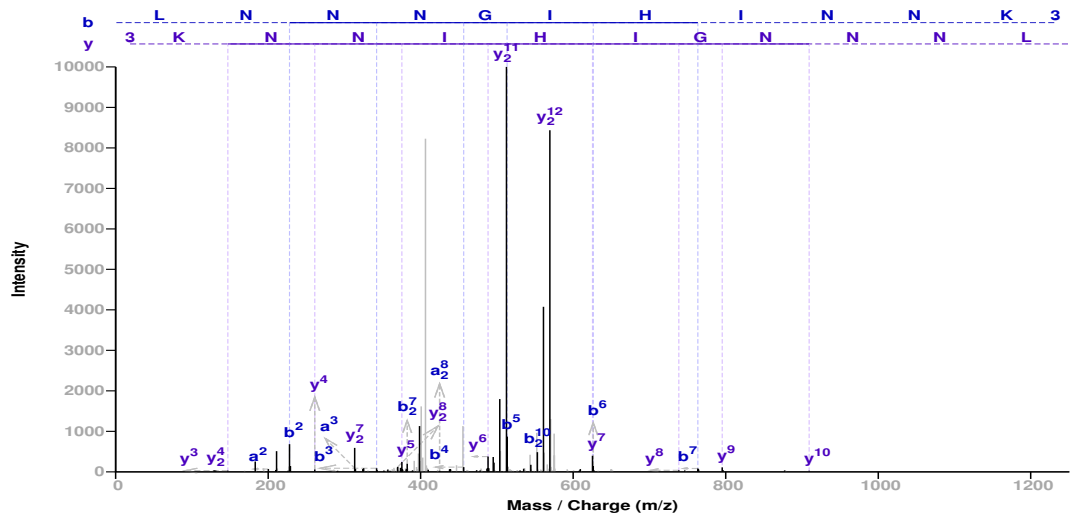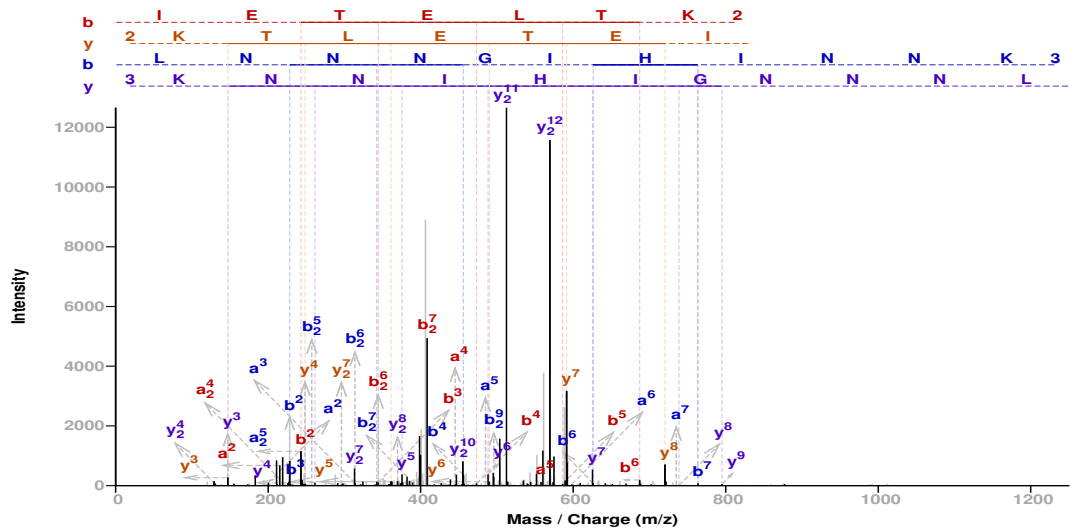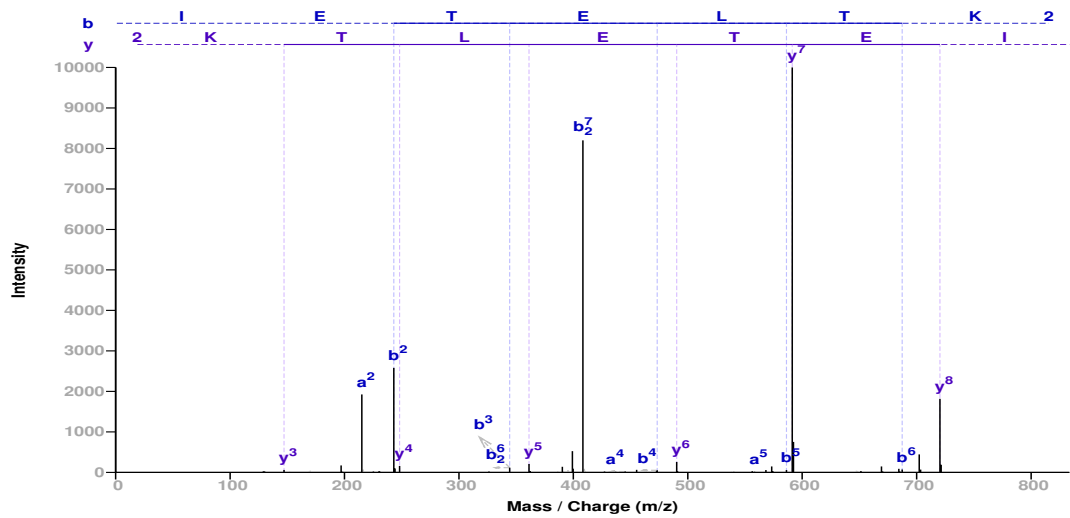

yeast00\_Scan\_Number\_5510 Precursor m/z: 530.597 cosine: 0.872  $\alpha$ : 0.290

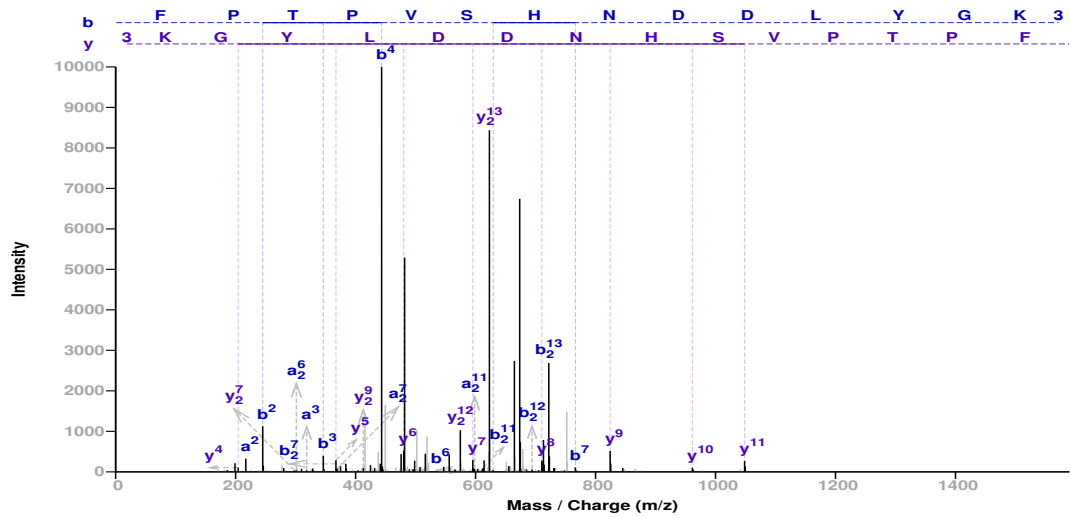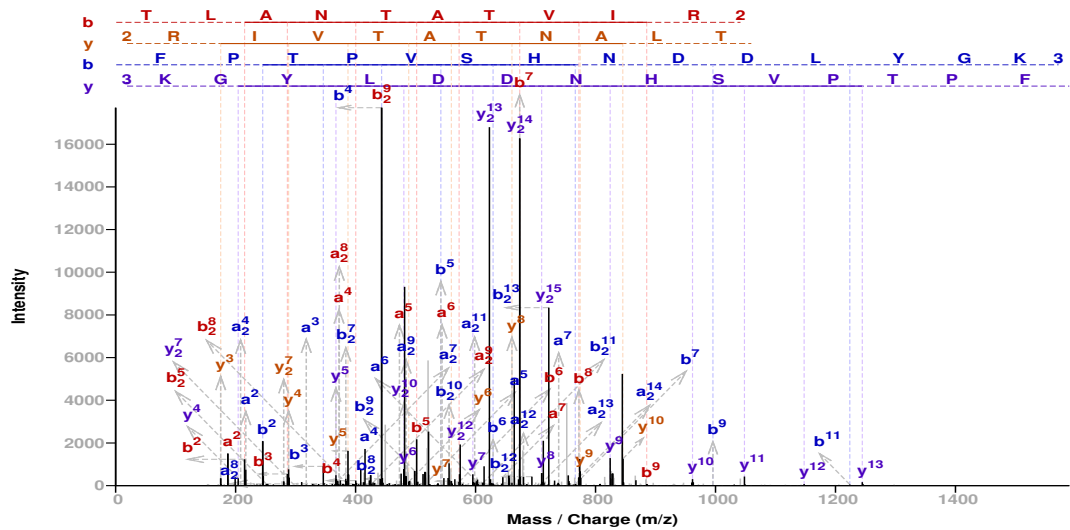



yeast00\_Scan\_Number\_3893 Precursor m/z: 780.388 cosine: 0.767  $\alpha$ : 0.289

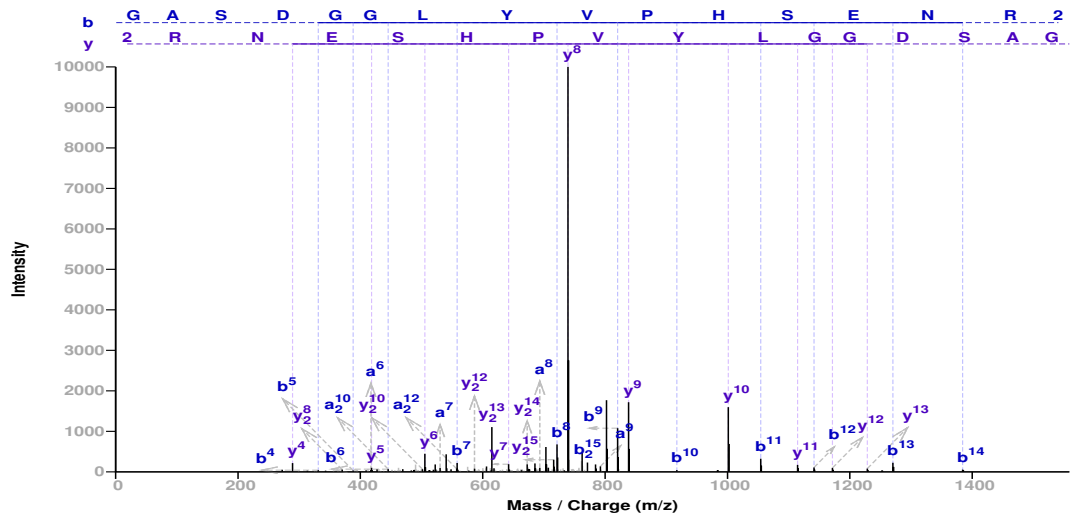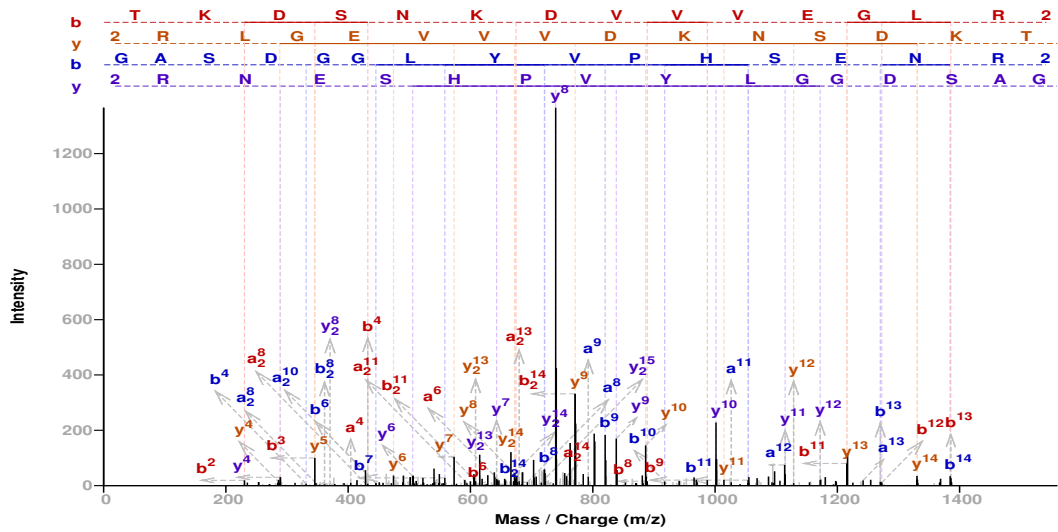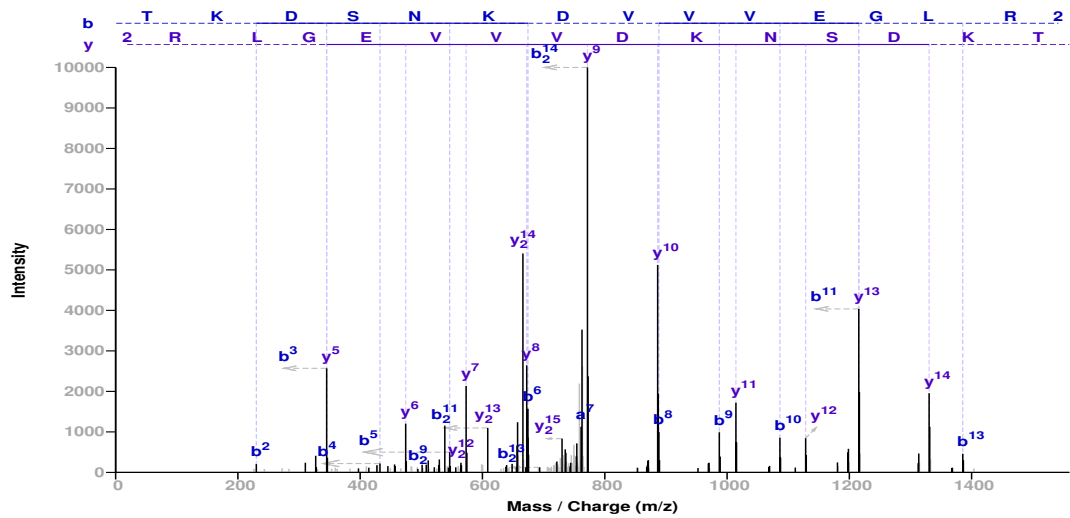

yeast00\_Scan\_Number\_7351 Precursor m/z: 536.330 cosine: 0.801  $\alpha$ : 0.289

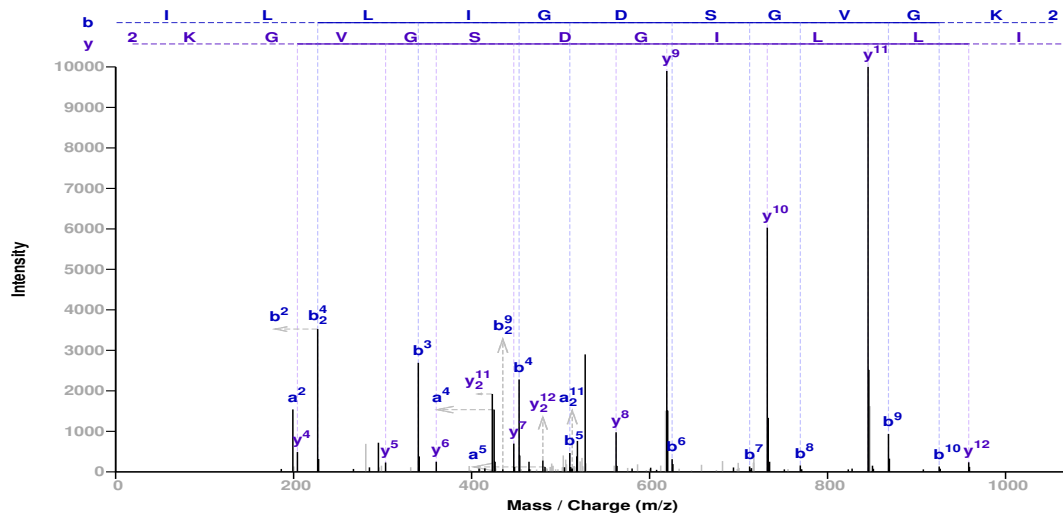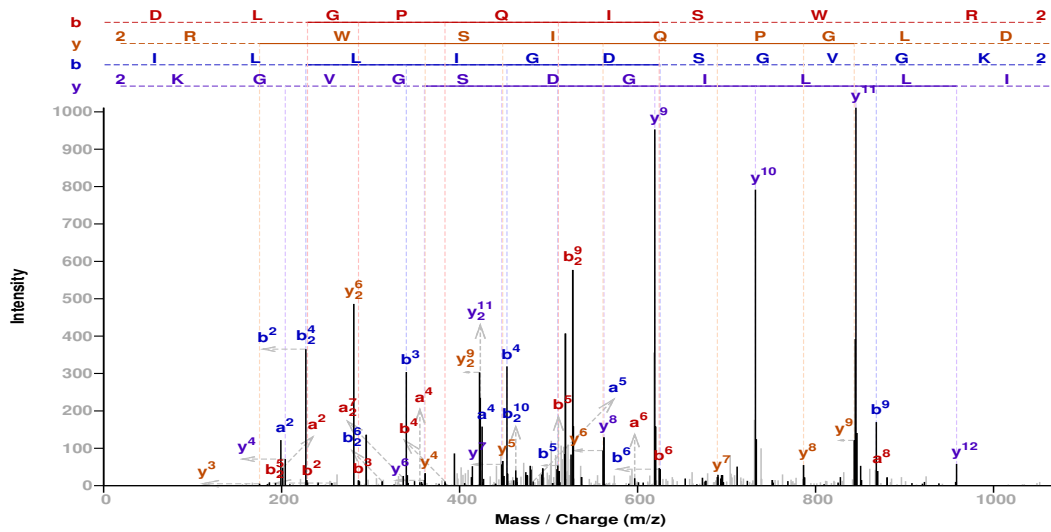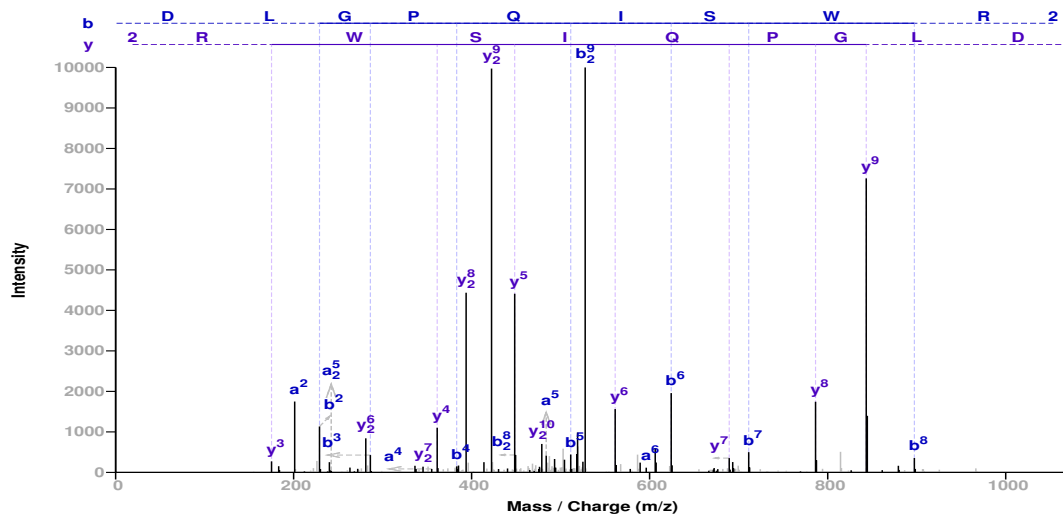



yeast00\_Scan\_Number\_3328 Precursor m/z: 415.744 cosine: 0.906  $\alpha$ : 0.272

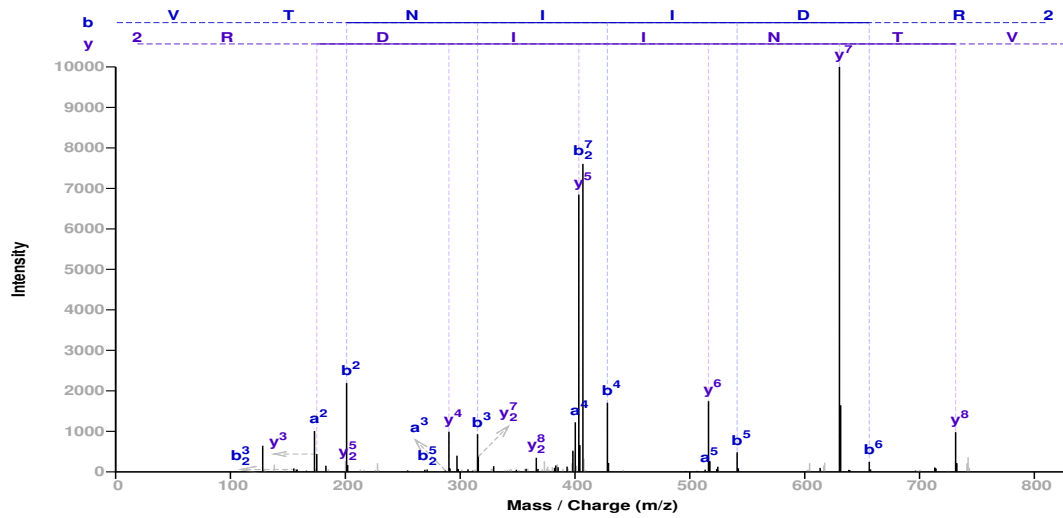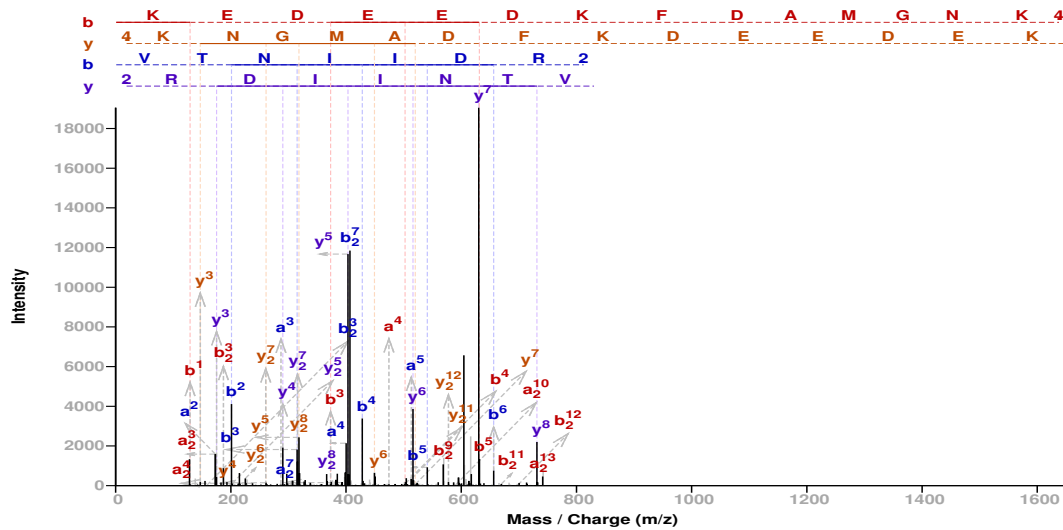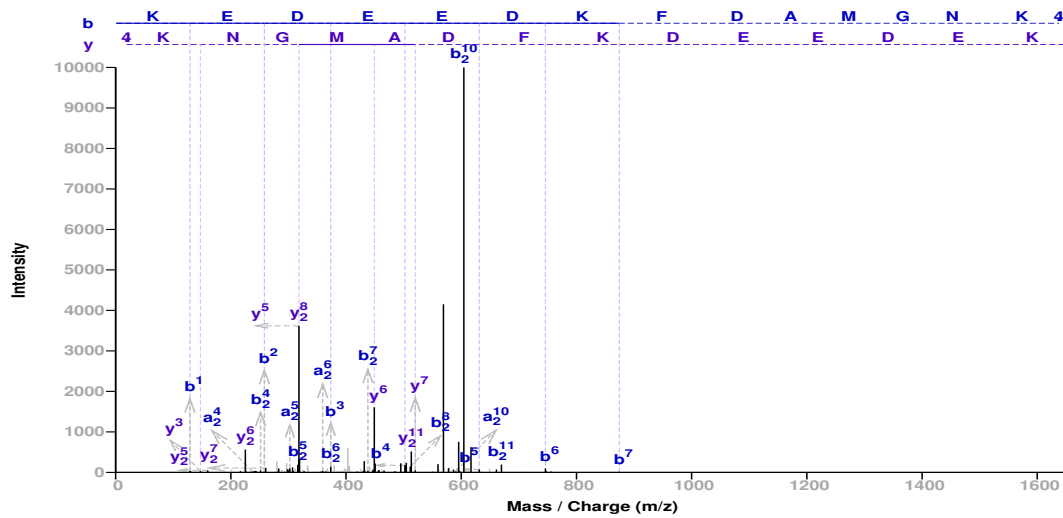



yeast00\_Scan\_Number\_3938 Precursor m/z: 494.267 cosine: 0.772  $\alpha$ : 0.269

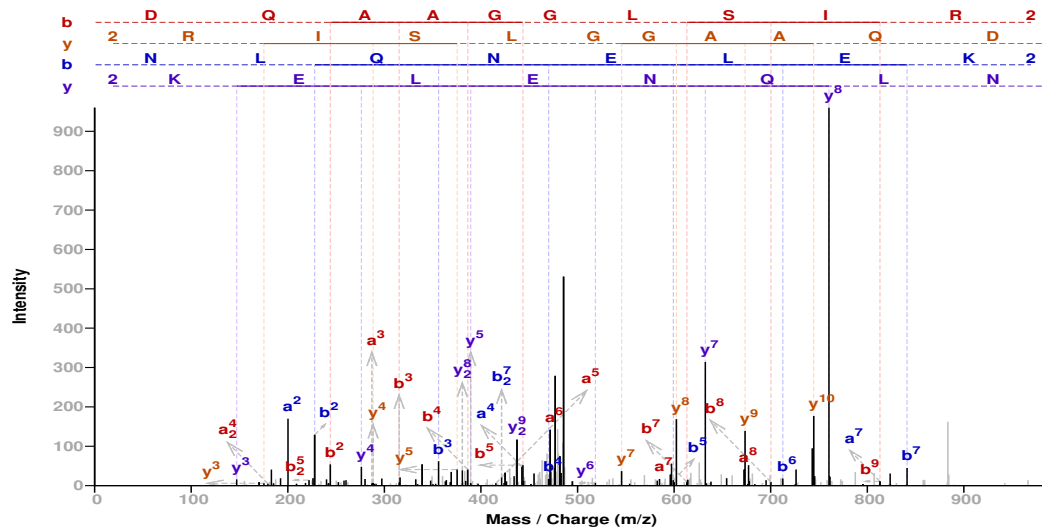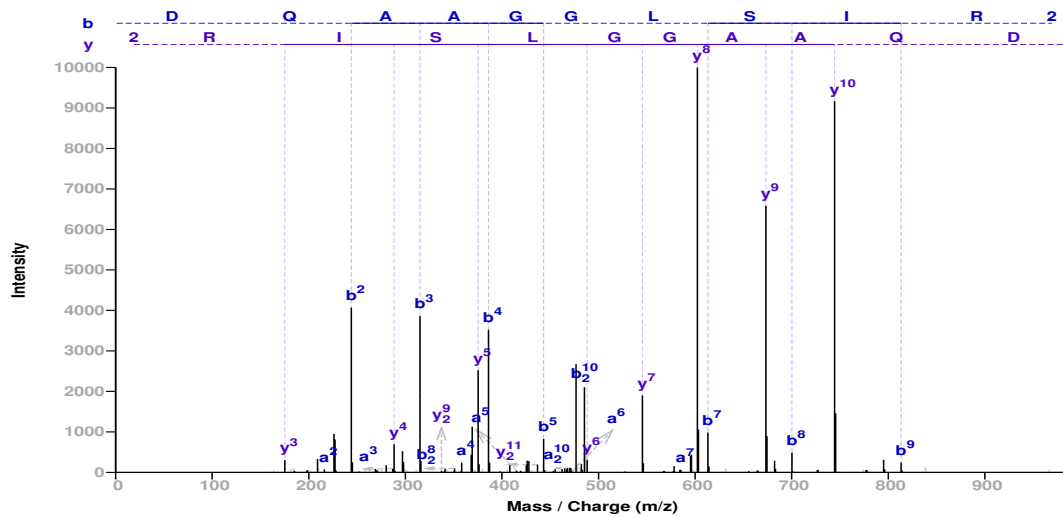



yeast00\_Scan\_Number\_4869 Precursor m/z: 415.251 cosine: 0.804  $\alpha$ : 0.258

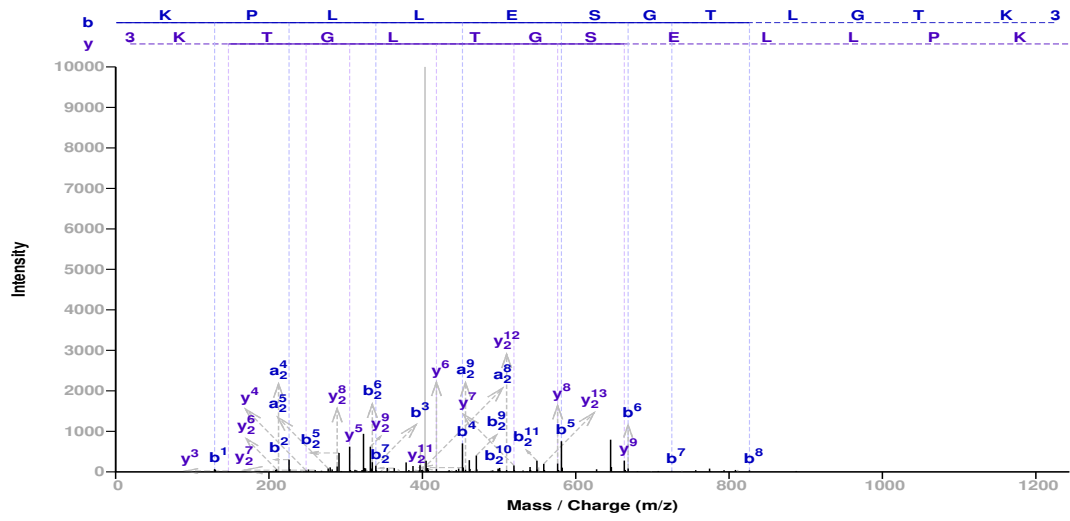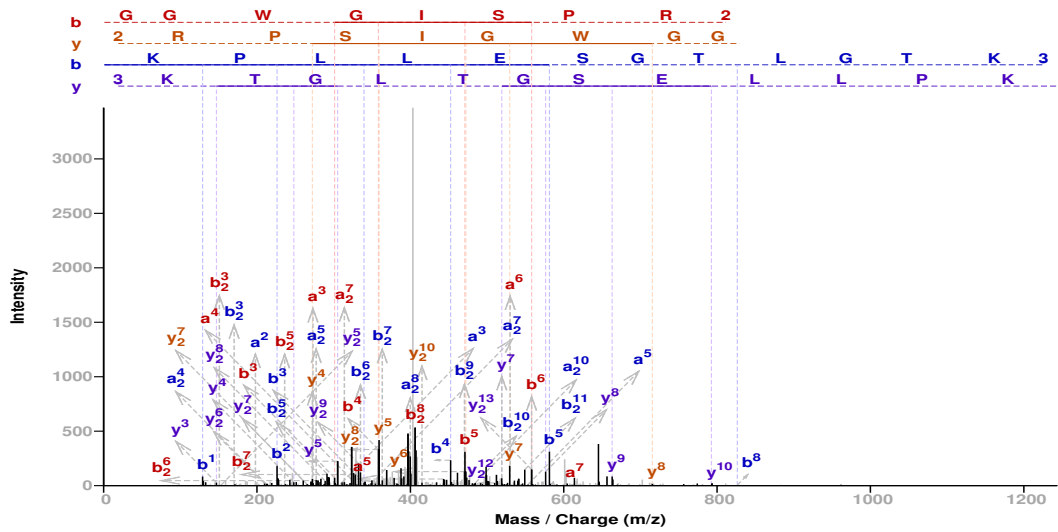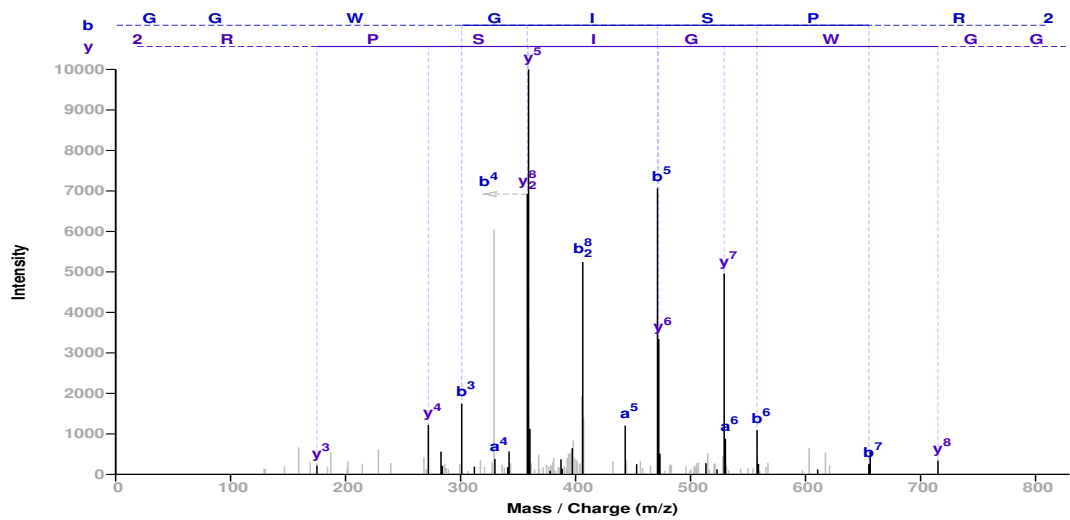







yeast00\_Scan\_Number\_1760 Precursor m/z: 449.763 cosine: 0.832  $\alpha$ : 0.247

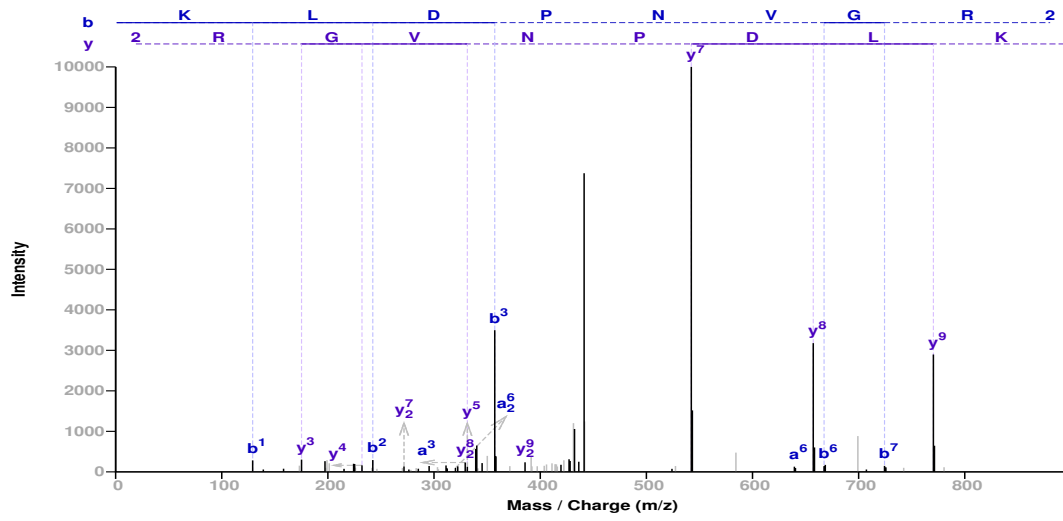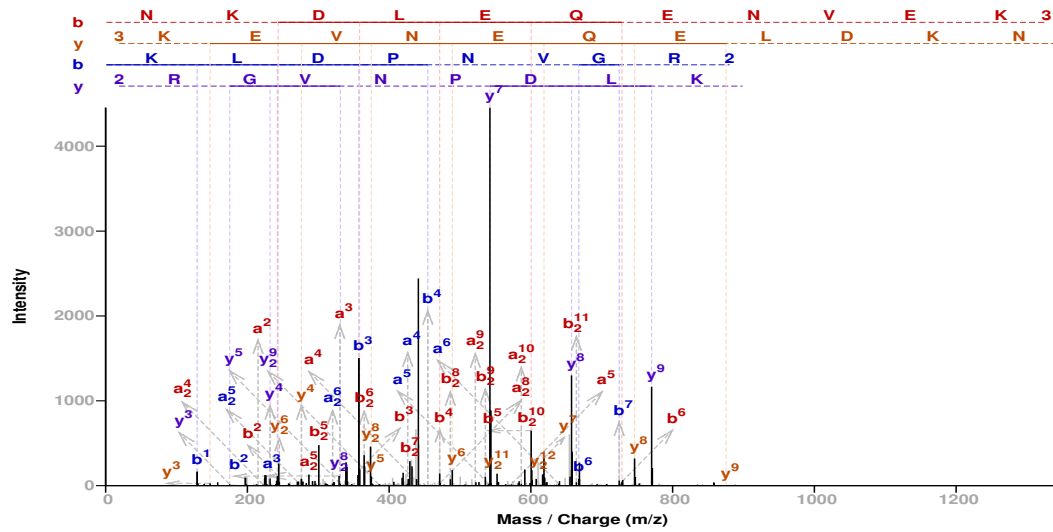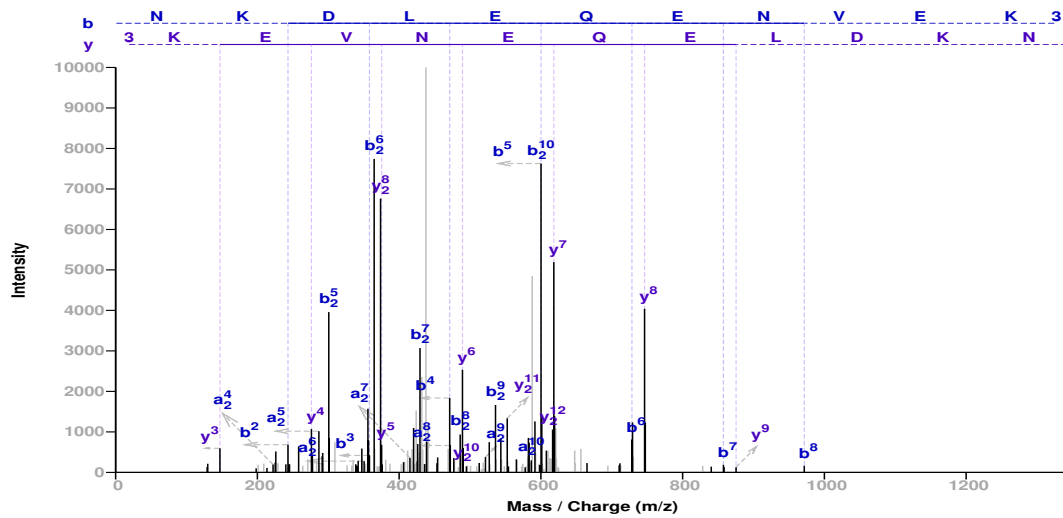

yeast00\_Scan\_Number\_3949 Precursor m/z: 391.548 cosine: 0.761  $\alpha$ : 0.247

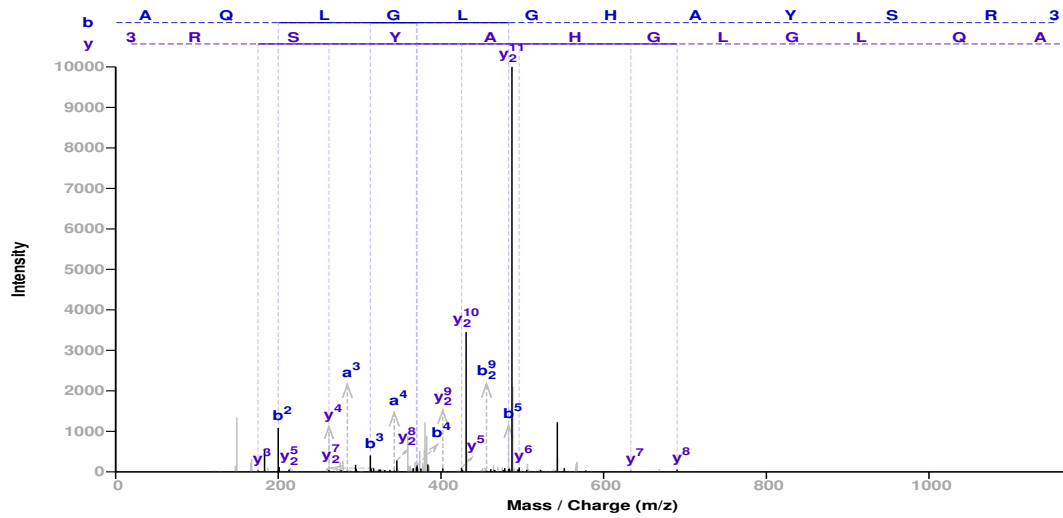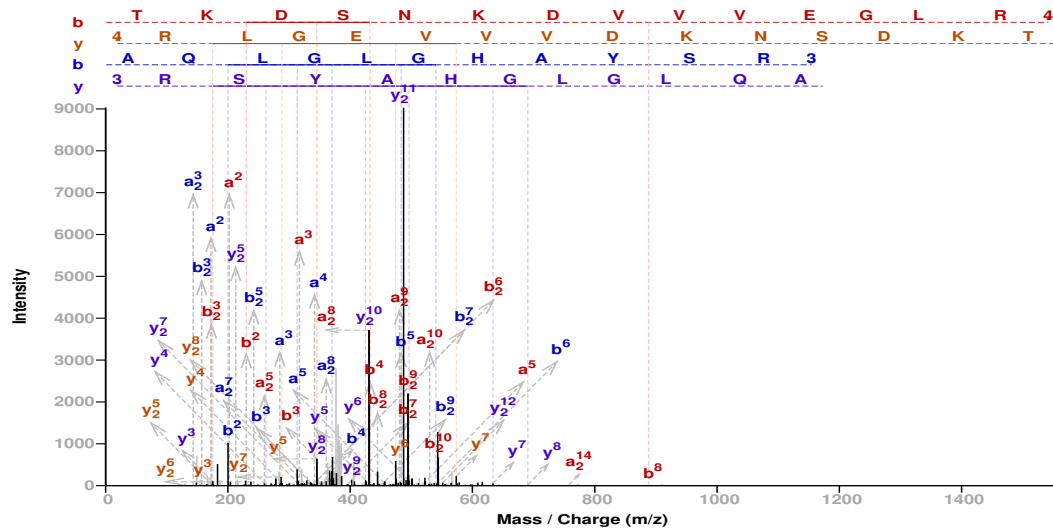

yeast00\_Scan\_Number\_6226 Precursor m/z: 592.819 cosine: 0.874  $\alpha$ : 0.246

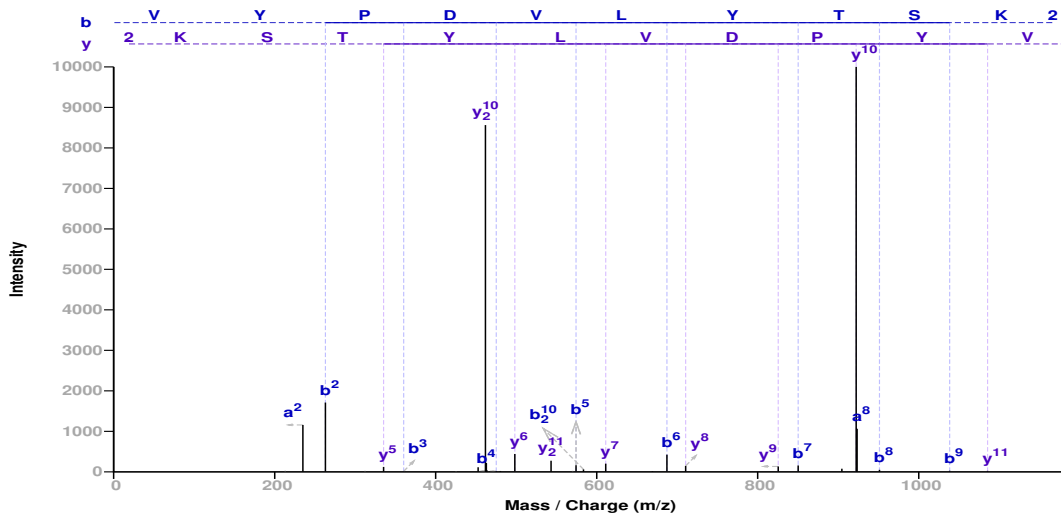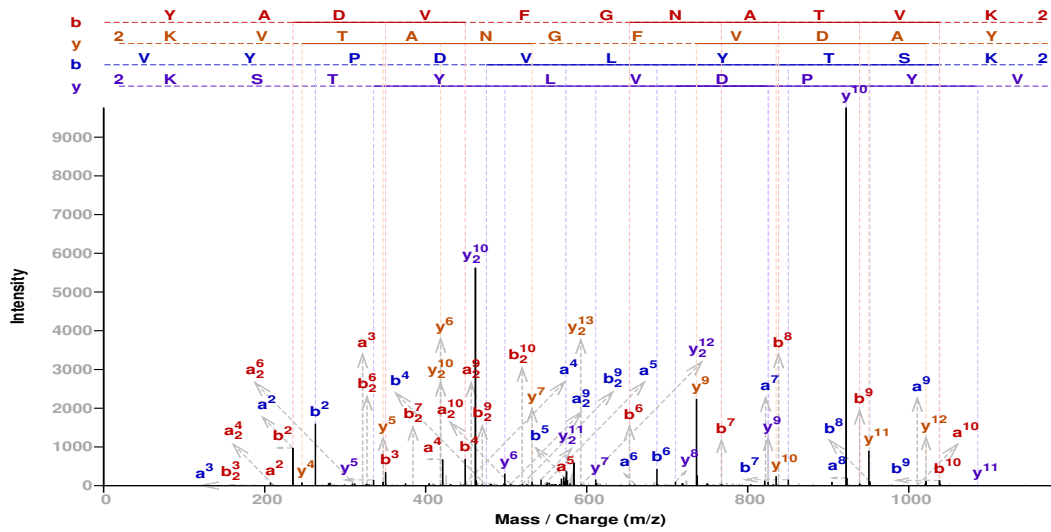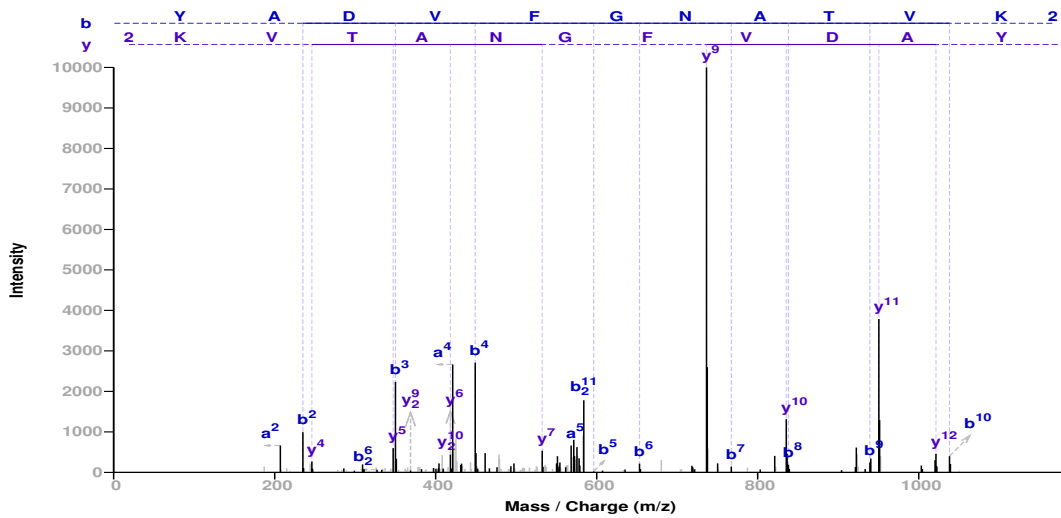

yeast00\_Scan\_Number\_4101 Precursor m/z: 565.742 cosine: 0.812  $\alpha$ : 0.245

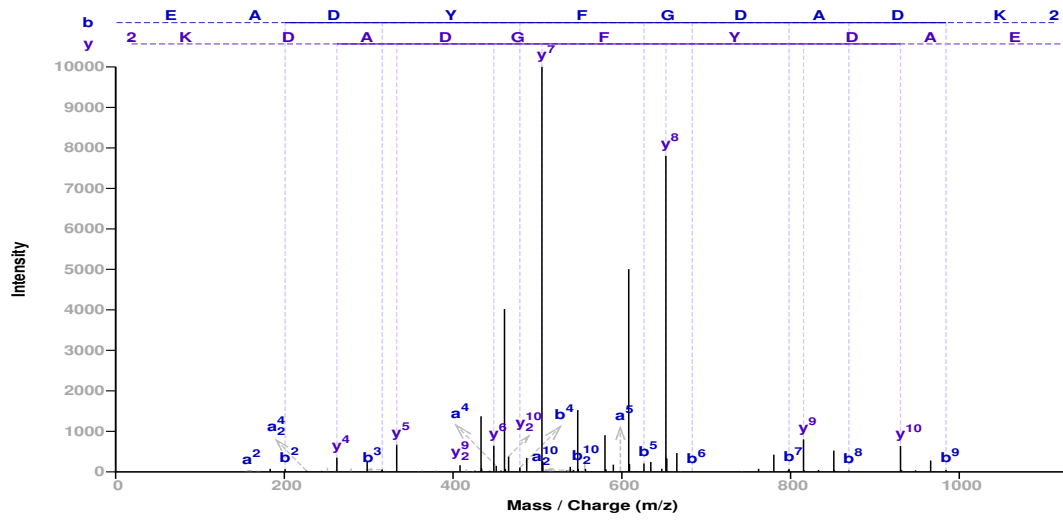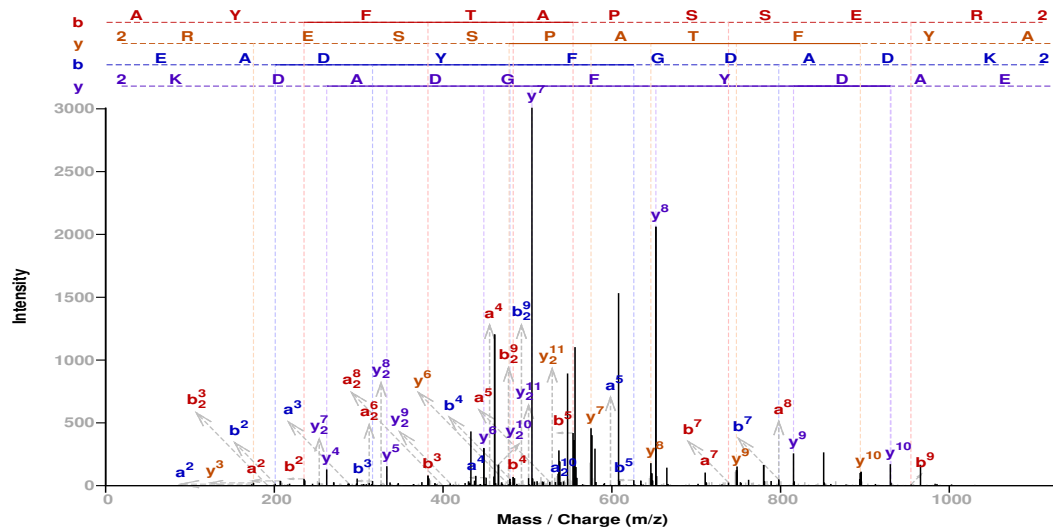

yeast00\_Scan\_Number\_3245 Precursor m/z: 479.277 cosine: 0.771  $\alpha$ : 0.238

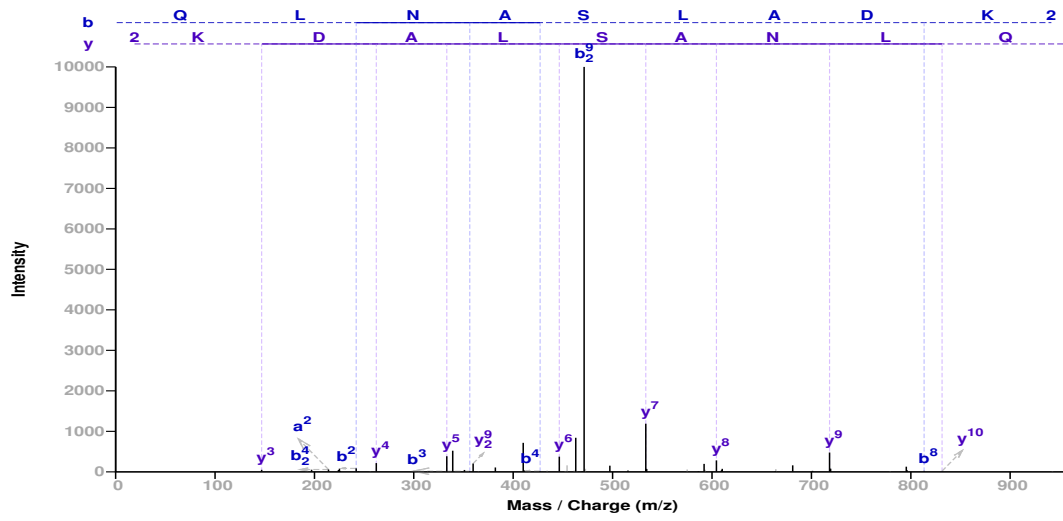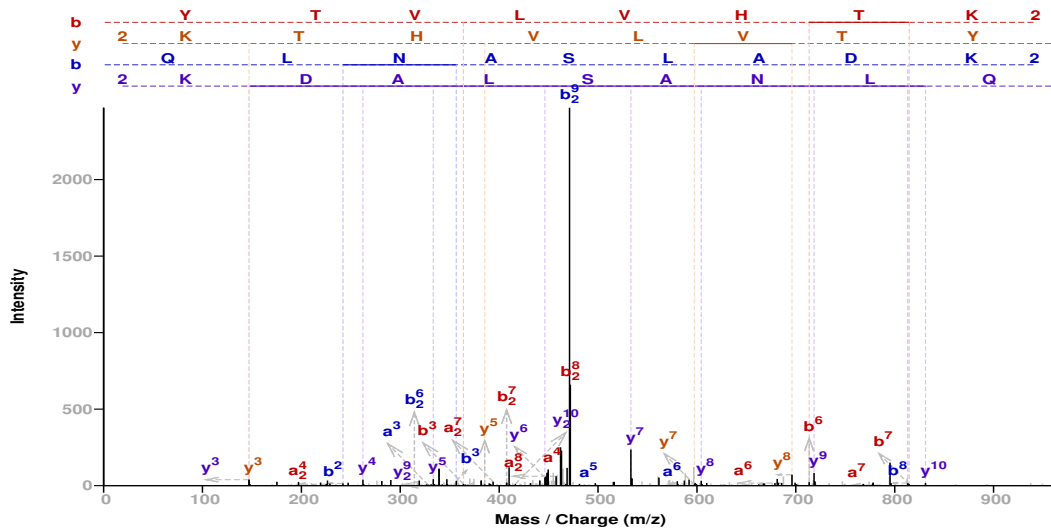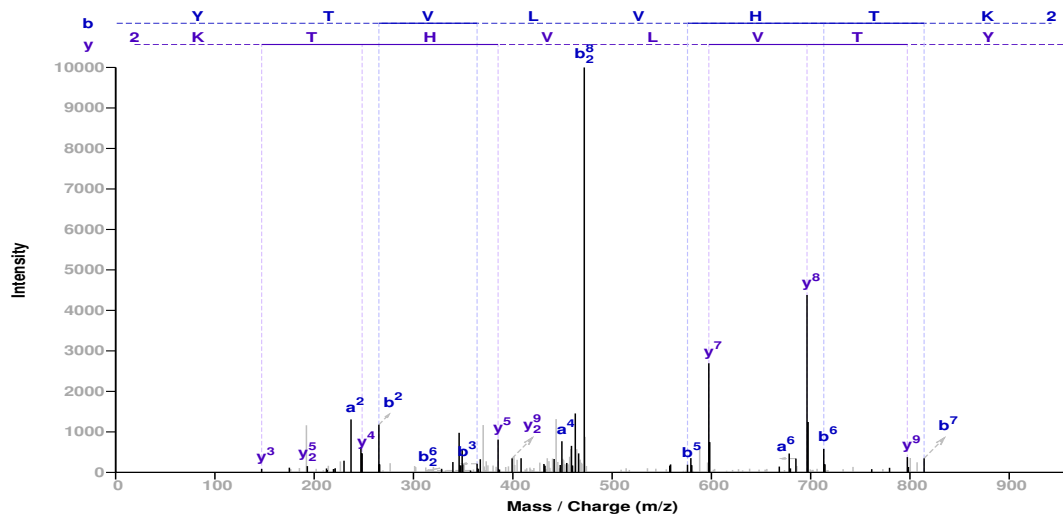

yeast00\_Scan\_Number\_3961 Precursor m/z: 515.778 cosine: 0.755  $\alpha$ : 0.231

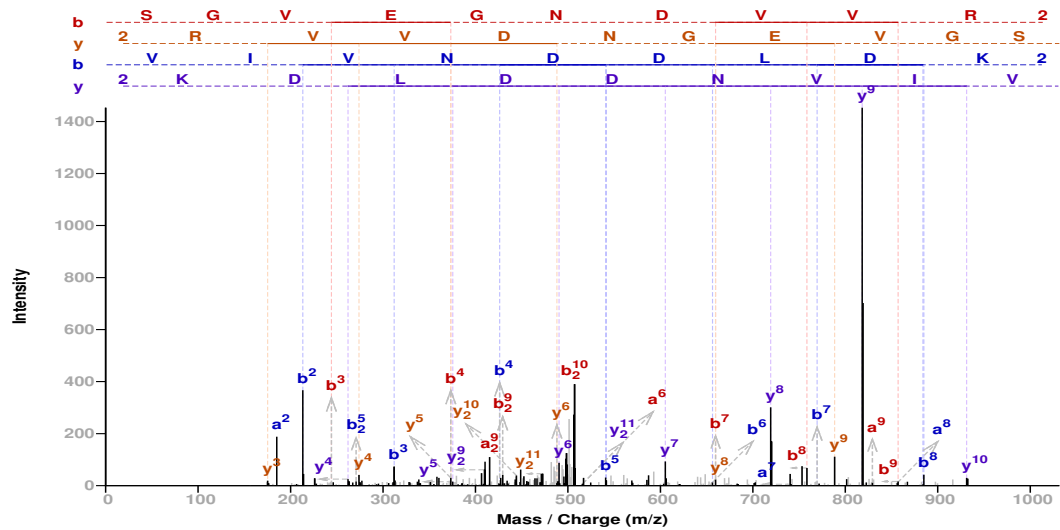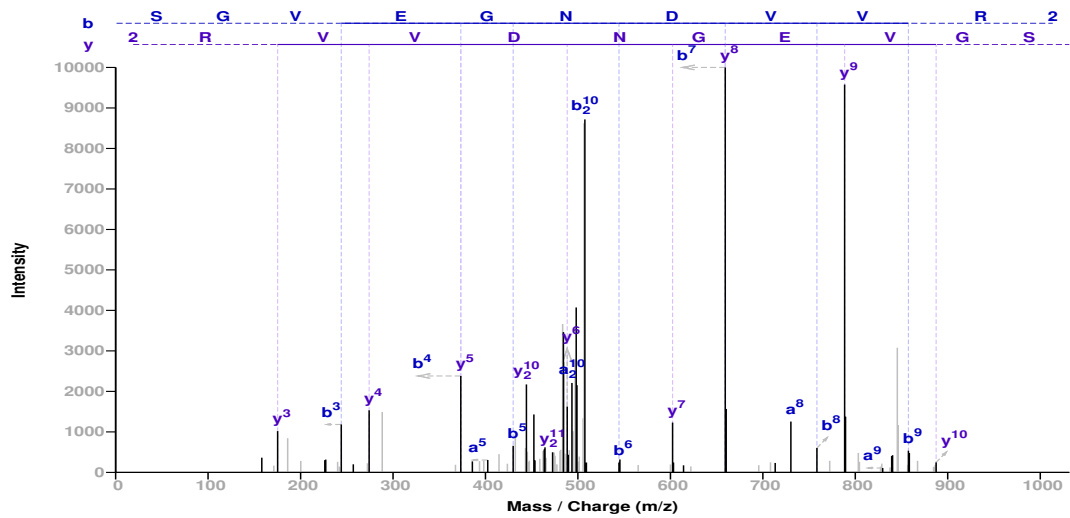



yeast00\_Scan\_Number\_7510 Precursor m/z: 621.858 cosine: 0.813  $\alpha$ : 0.230

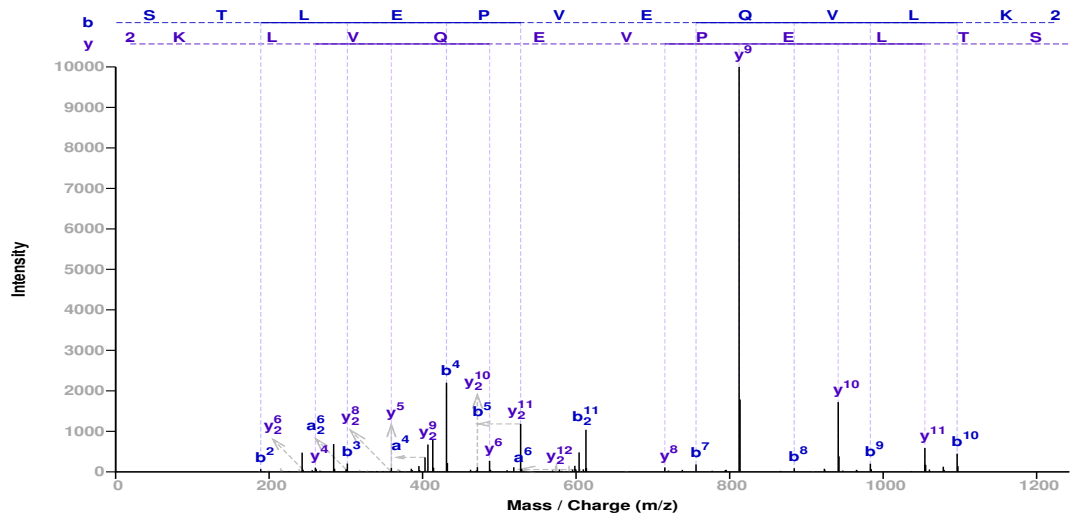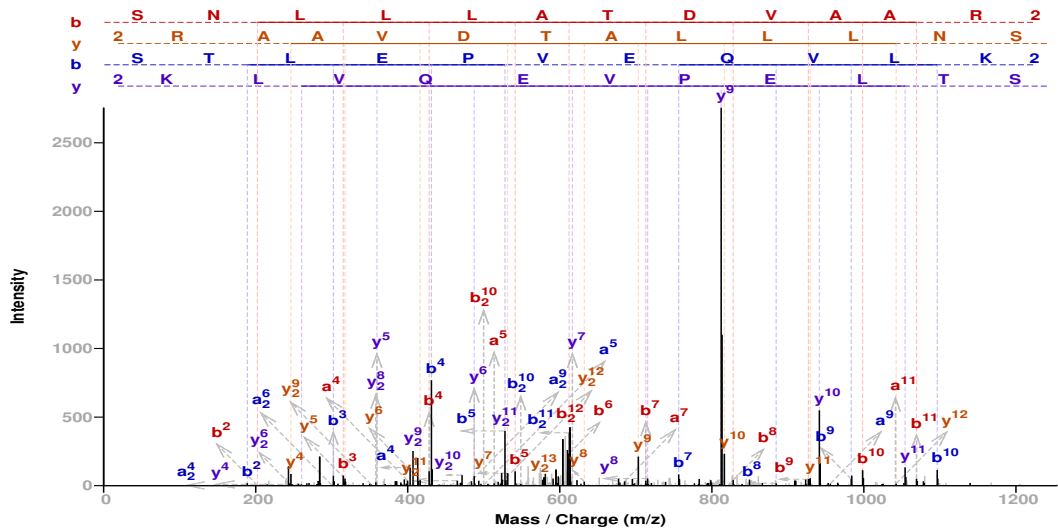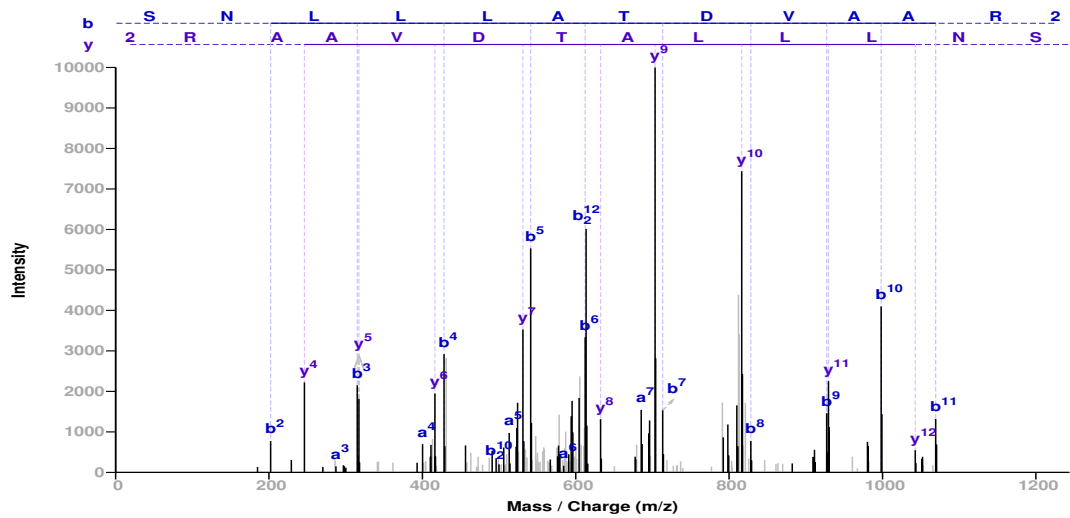

yeast00\_Scan\_Number\_2498 Precursor m/z: 375.211 cosine: 0.738  $\alpha$ : 0.228

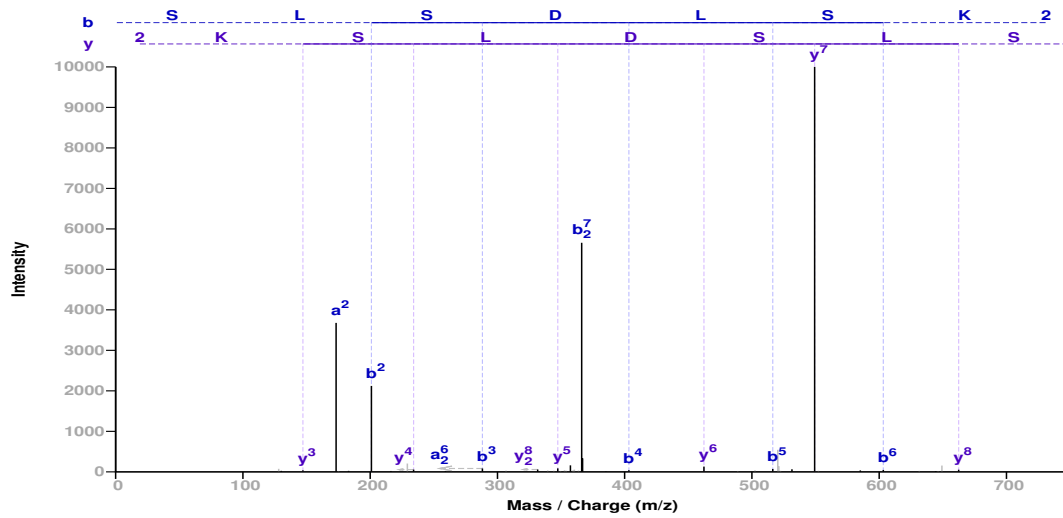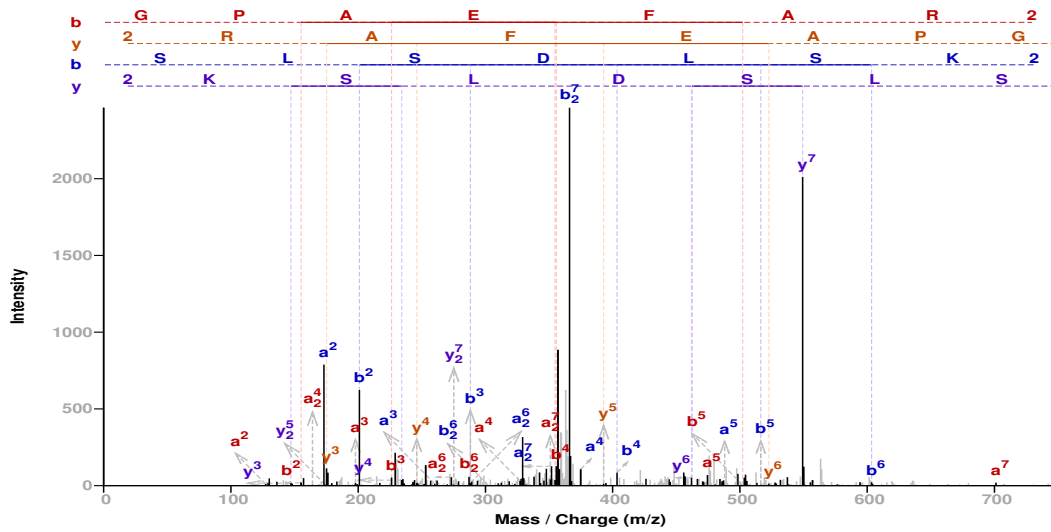

yeast00\_Scan\_Number\_5199 Precursor m/z: 429.558 cosine: 0.758  $\alpha$ : 0.227

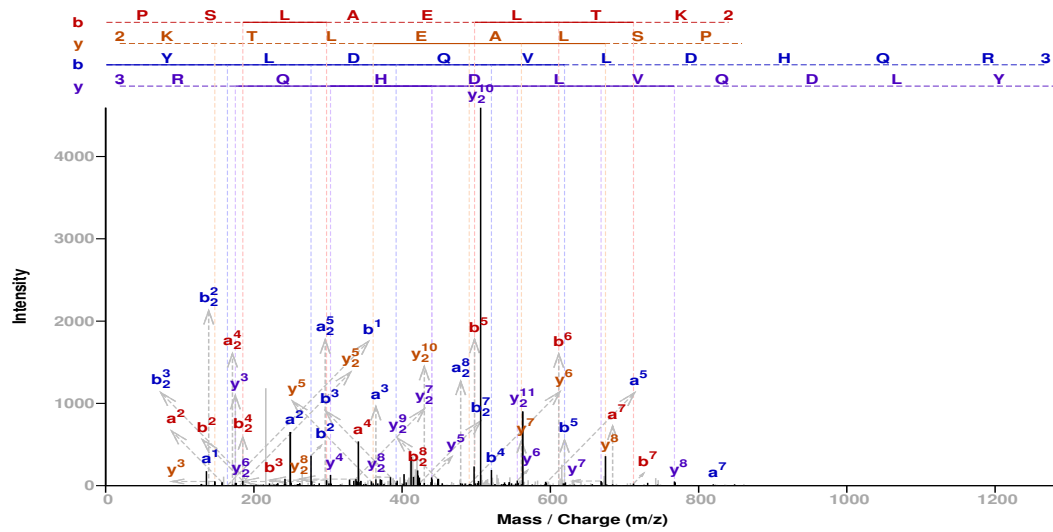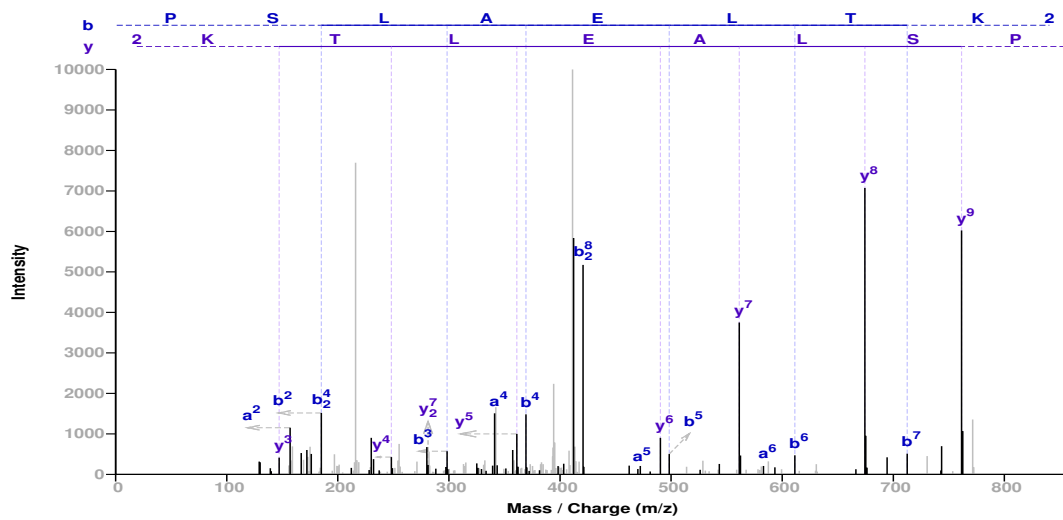

yeast00\_Scan\_Number\_1166 Precursor m/z: 361.517 cosine: 0.794  $\alpha$ : 0.225

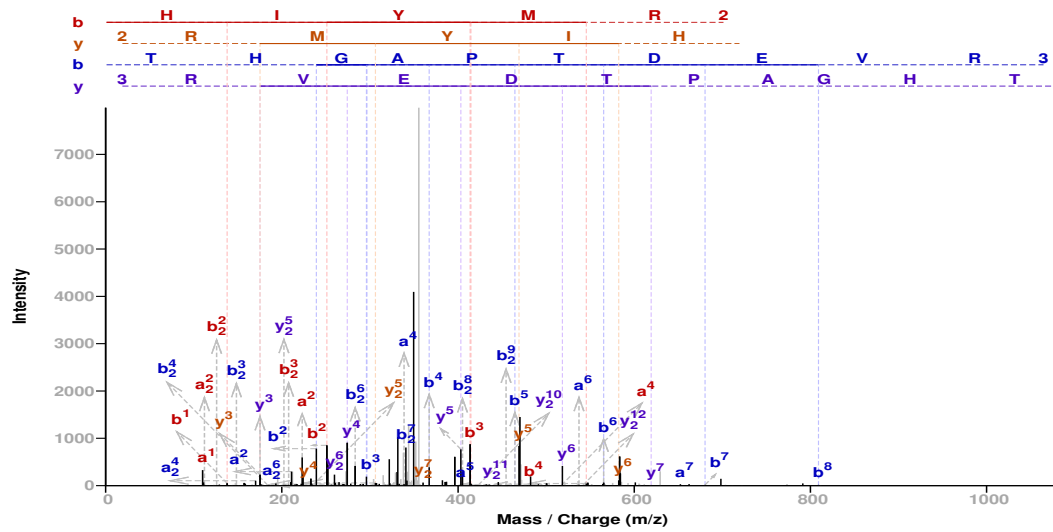

yeast00\_Scan\_Number\_3882 Precursor m/z: 390.719 cosine: 0.835  $\alpha$ : 0.223

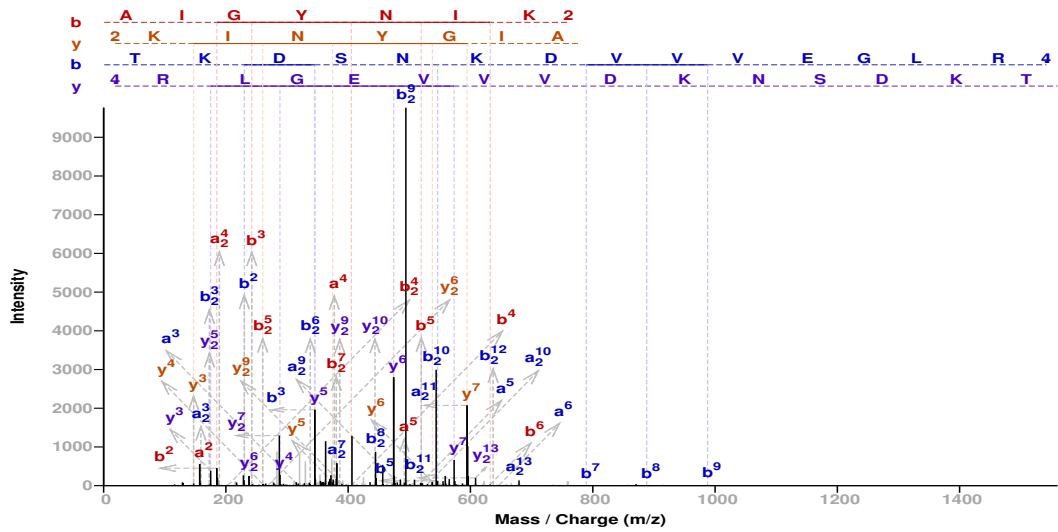

yeast00\_Scan\_Number\_5509 Precursor m/z: 477.580 cosine: 0.876  $\alpha$ : 0.220

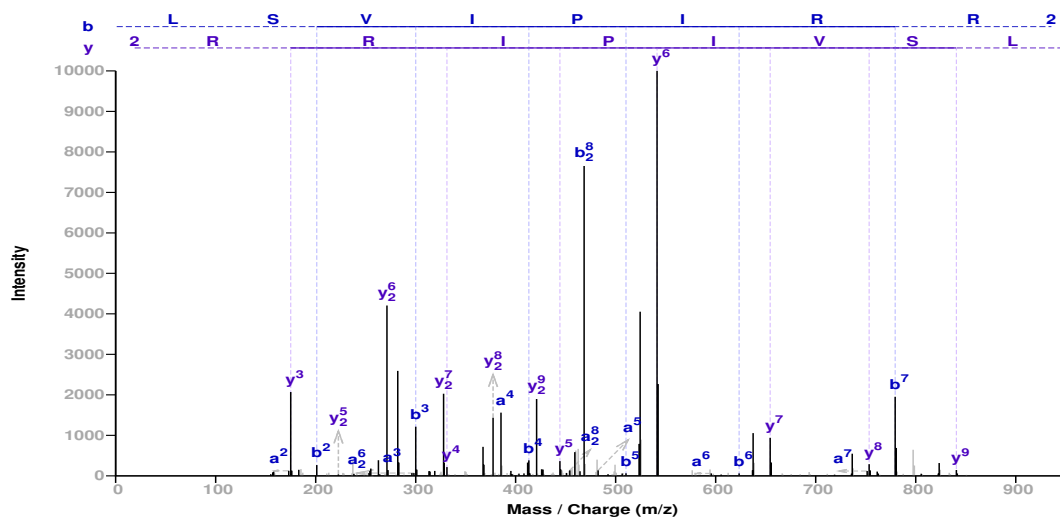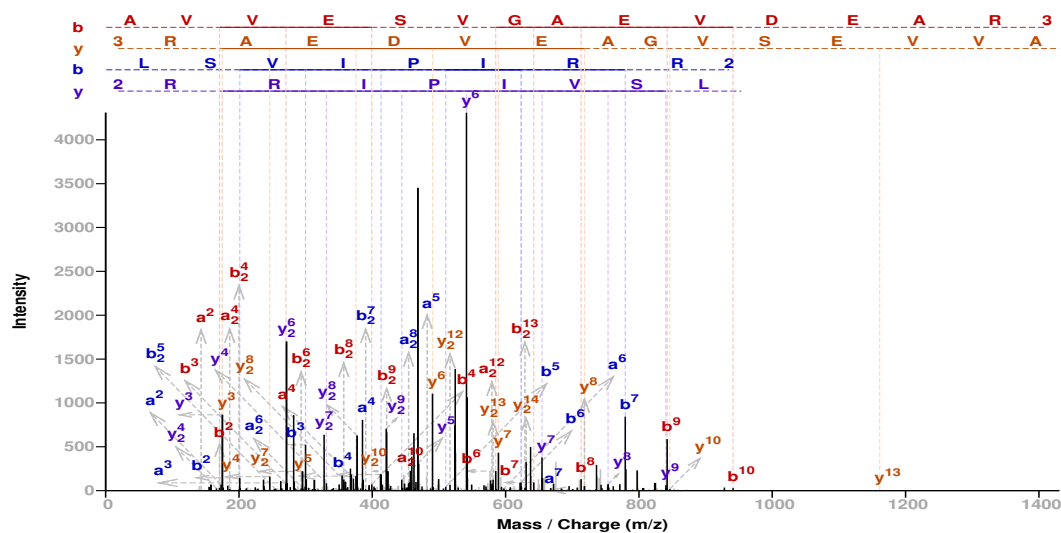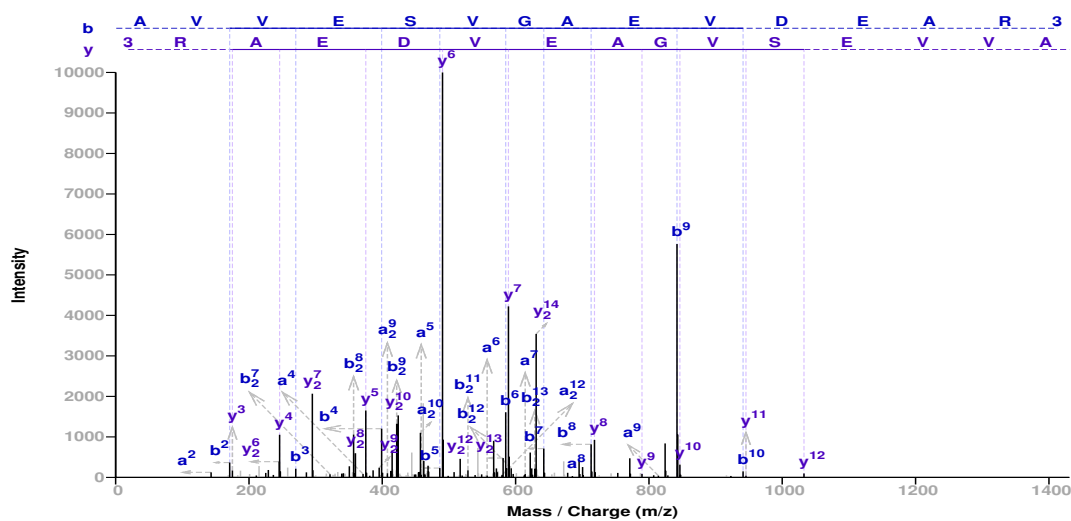

yeast00\_Scan\_Number\_3784 Precursor m/z: 387.213 cosine: 0.911  $\alpha$ : 0.214

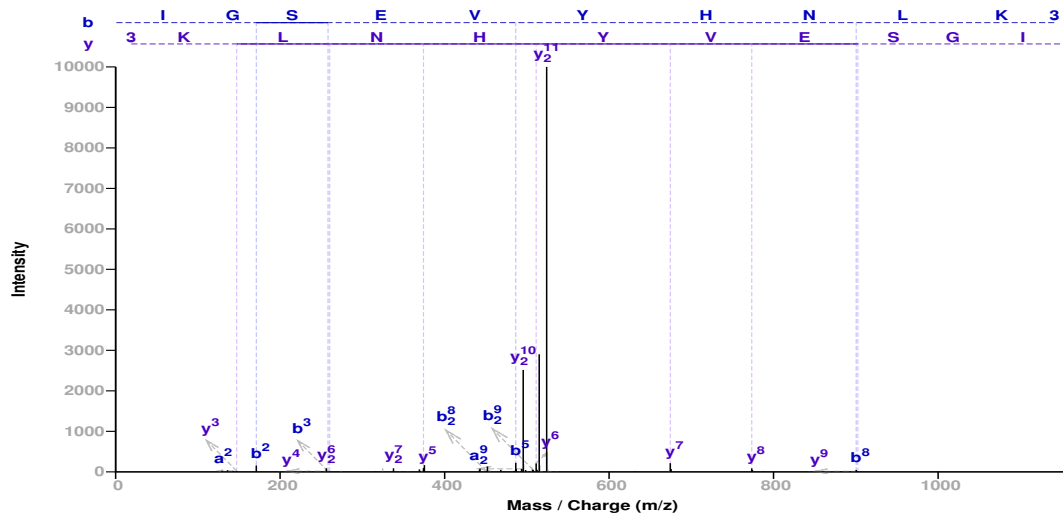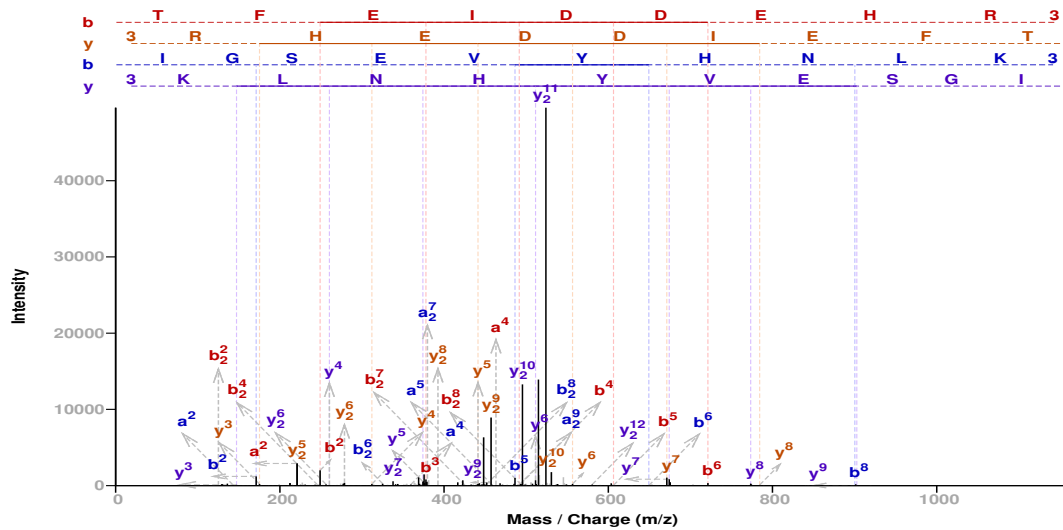

yeast00.Scan\_Number\_3791 Precursor m/z: 581.269 cosine: 0.897  $\alpha$ : 0.213

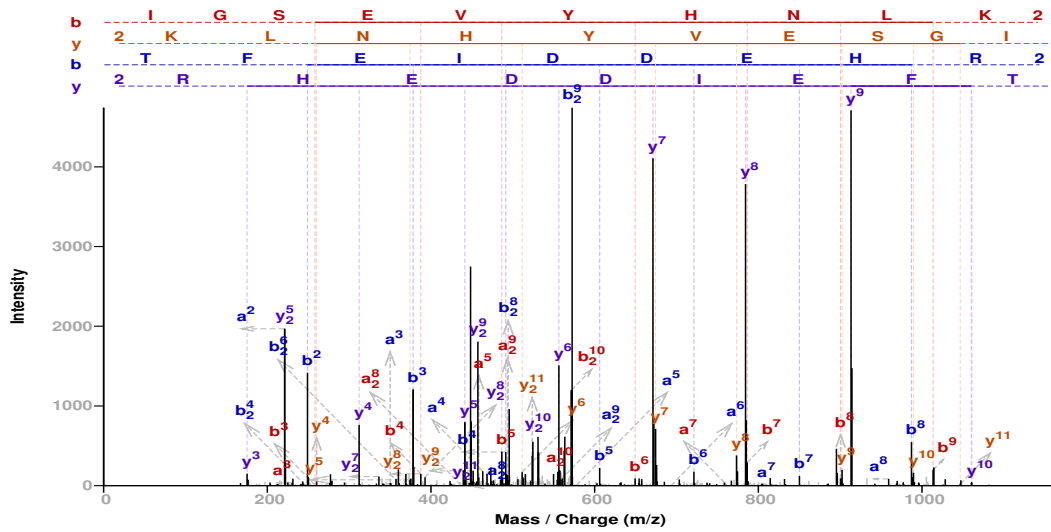



yeast00\_Scan\_Number\_4279 Precursor m/z: 350.737 cosine: 0.823  $\alpha$ : 0.212

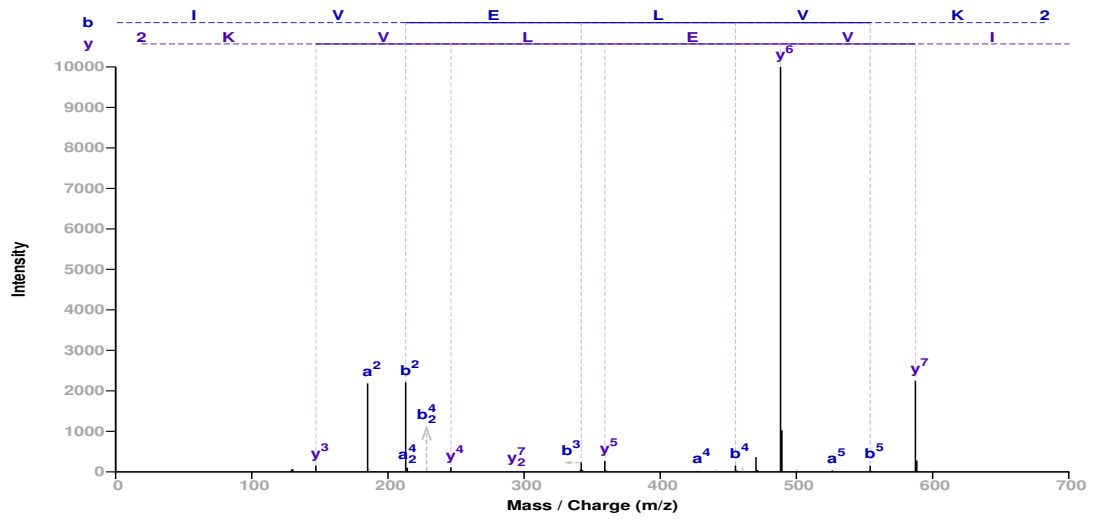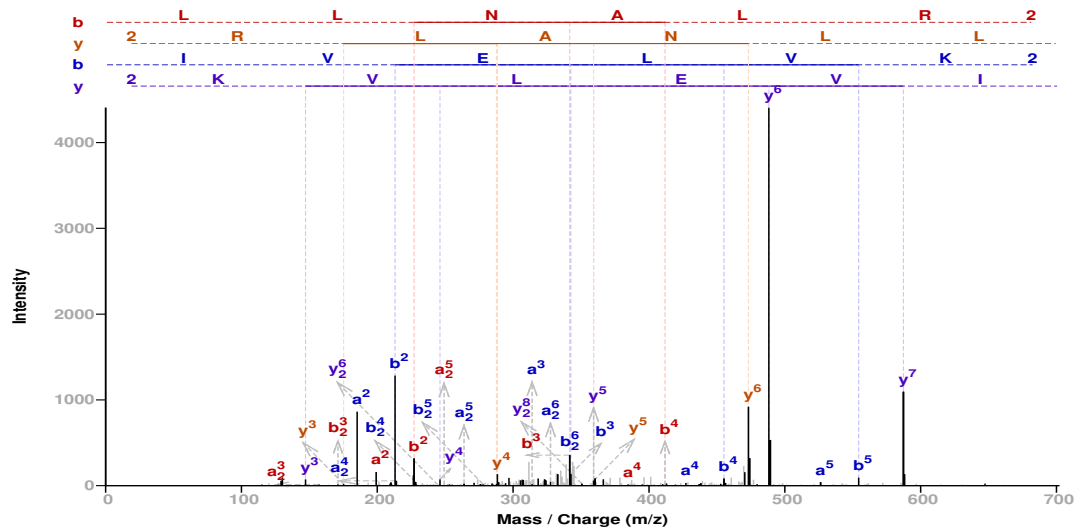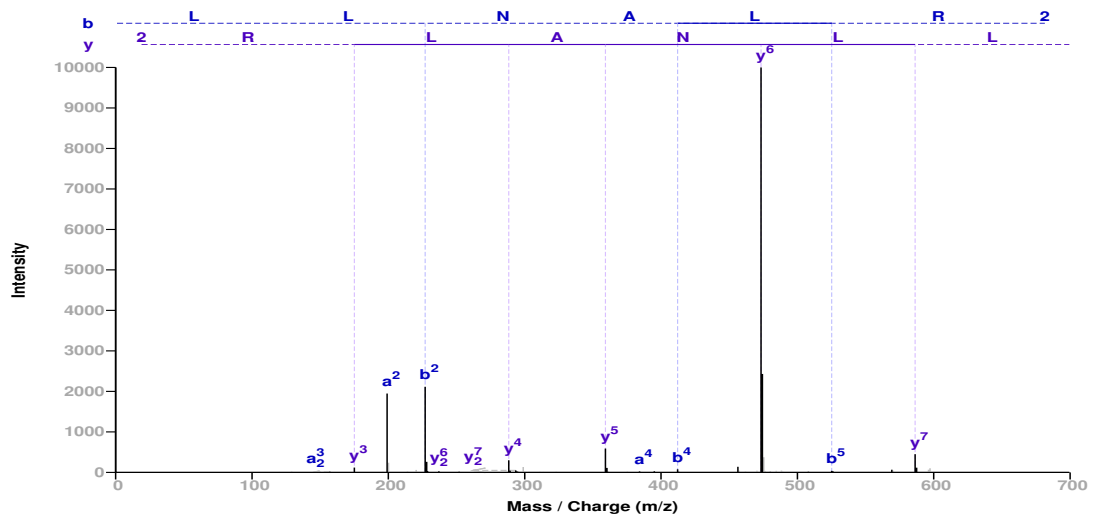

yeast00\_Scan\_Number\_1680 Precursor m/z: 442.718 cosine: 0.879  $\alpha$ : 0.211

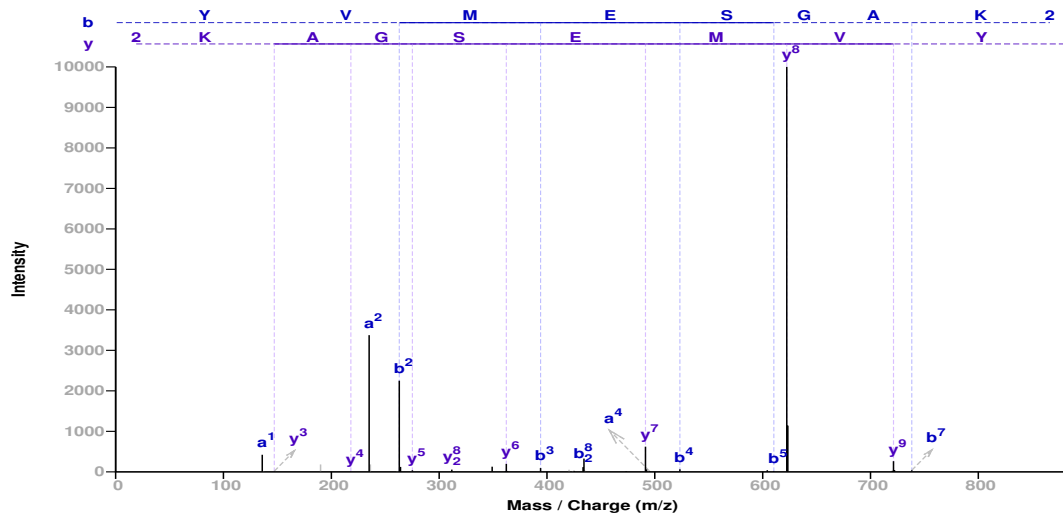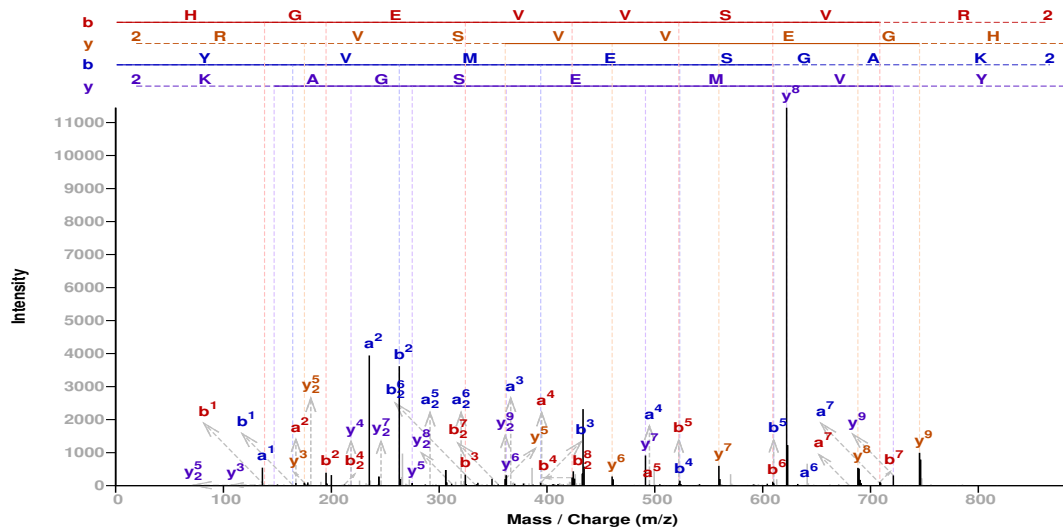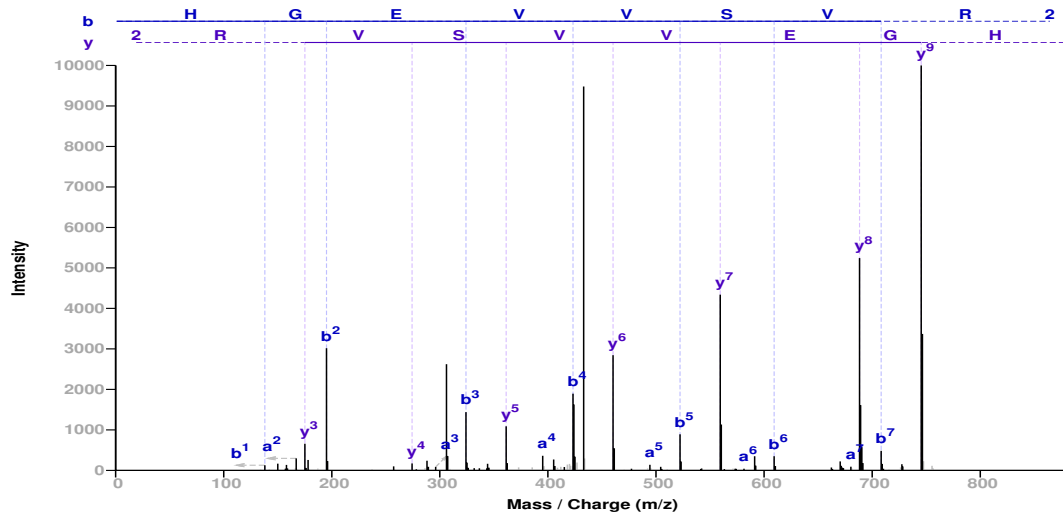



yeast00\_Scan\_Number\_3941 Precursor m/z: 452.744 cosine: 0.908  $\alpha$ : 0.206

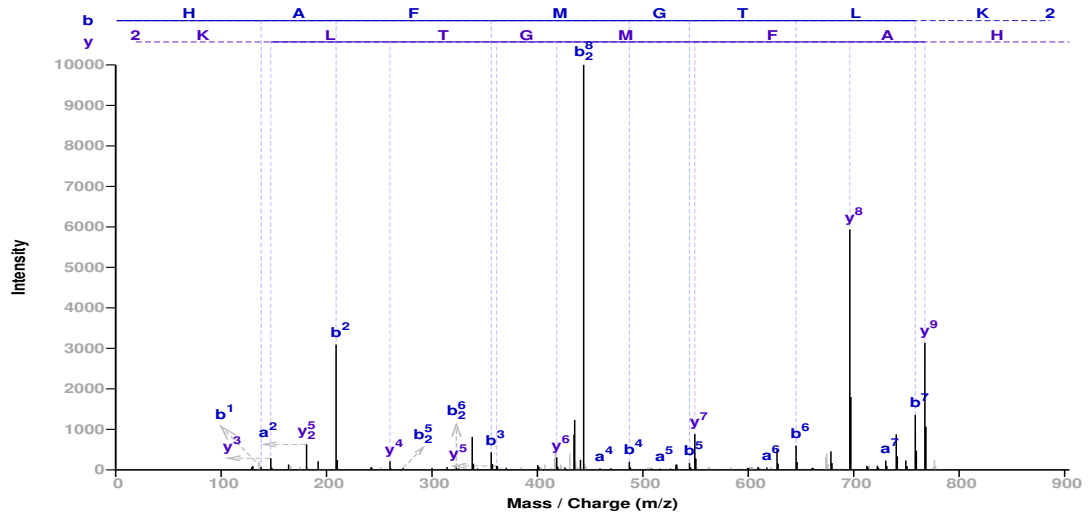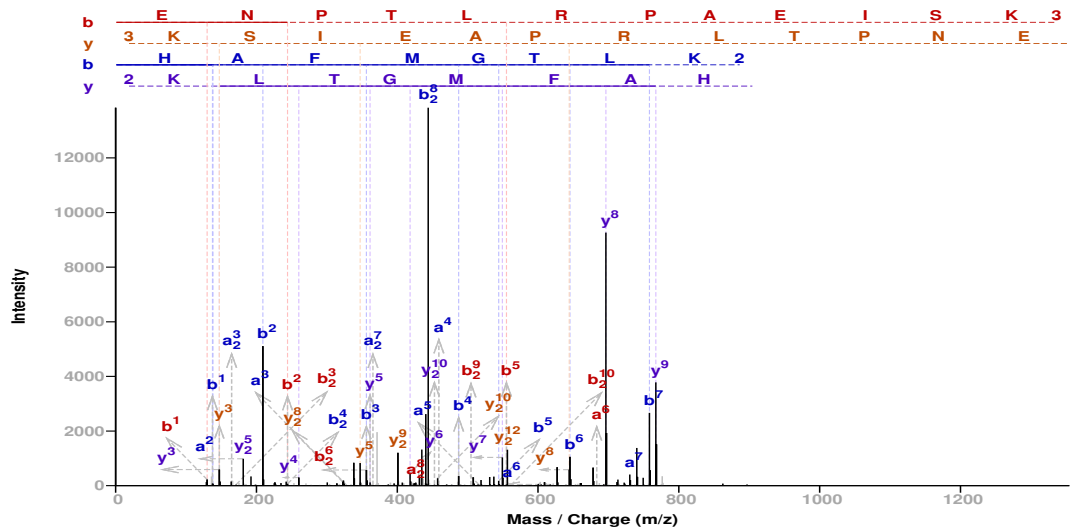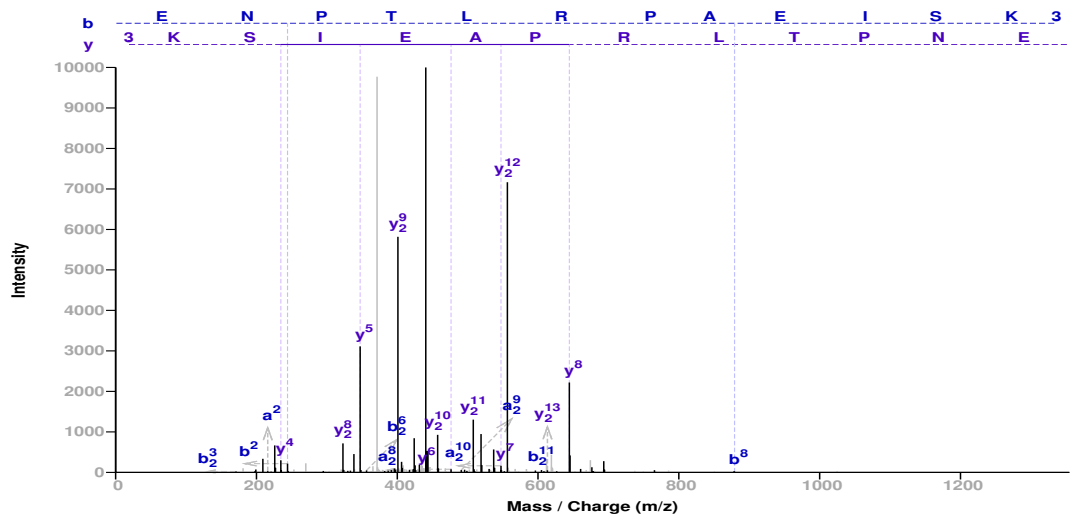



yeast00\_Scan\_Number\_4999 Precursor m/z: 452.579 cosine: 0.902  $\alpha$ : 0.198

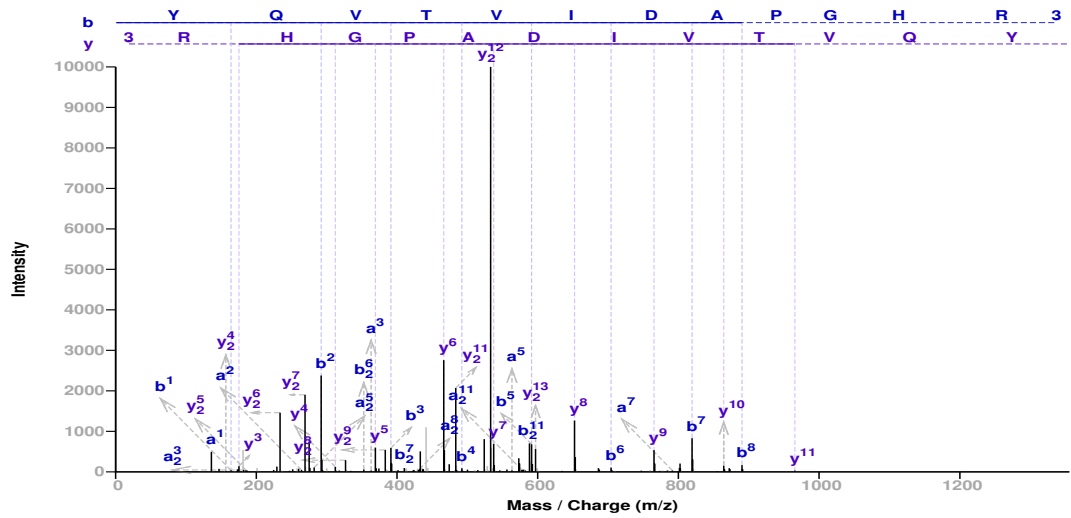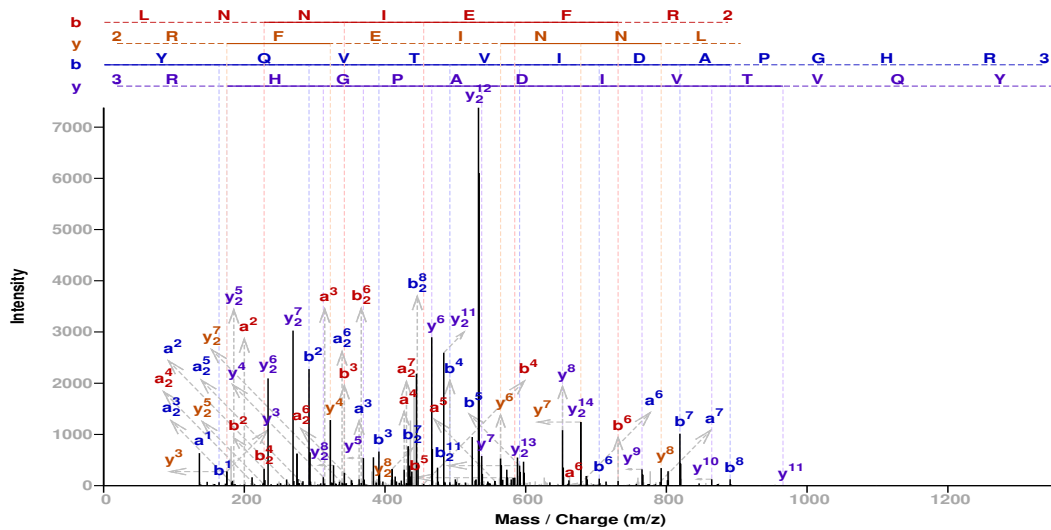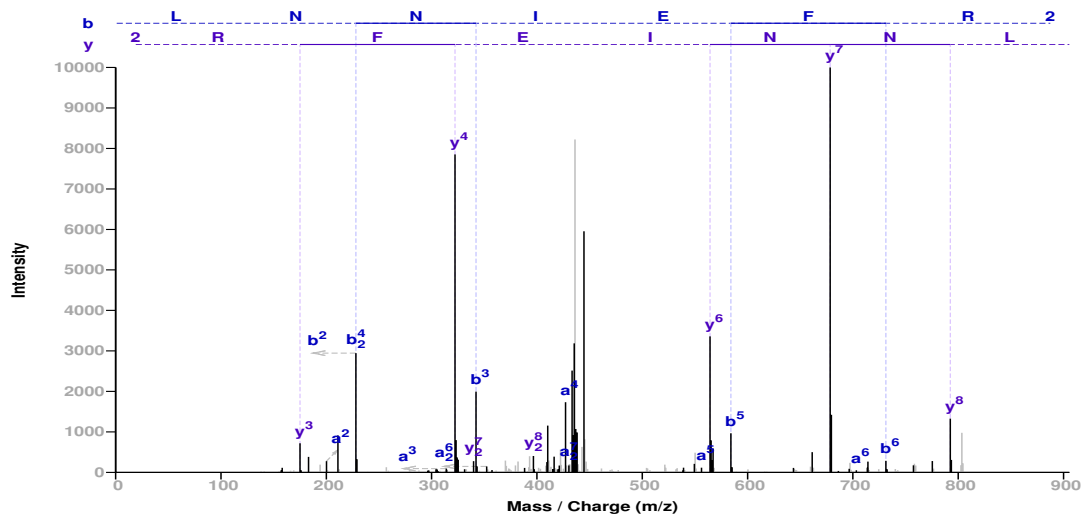

yeast00\_Scan\_Number\_3726 Precursor m/z: 549.270 cosine: 0.737  $\alpha$ : 0.192

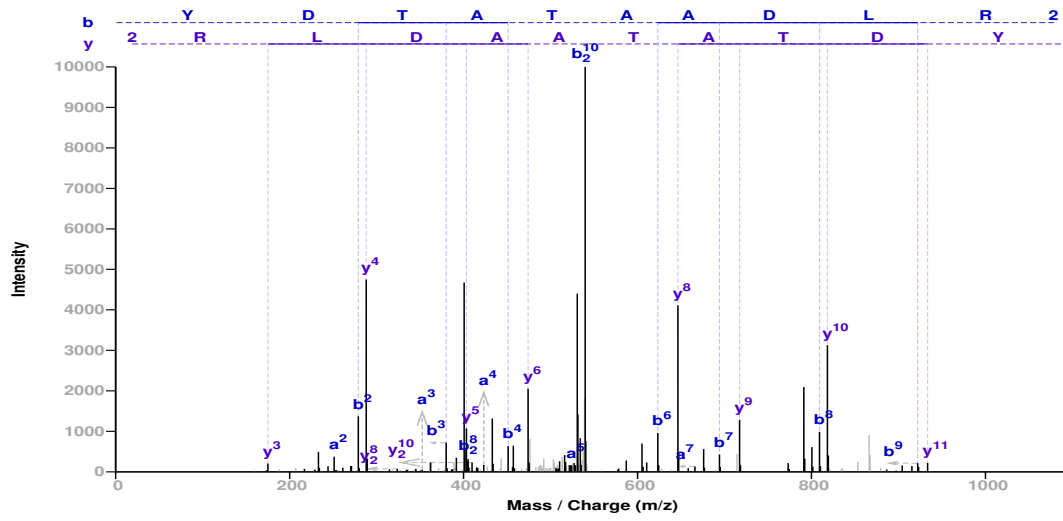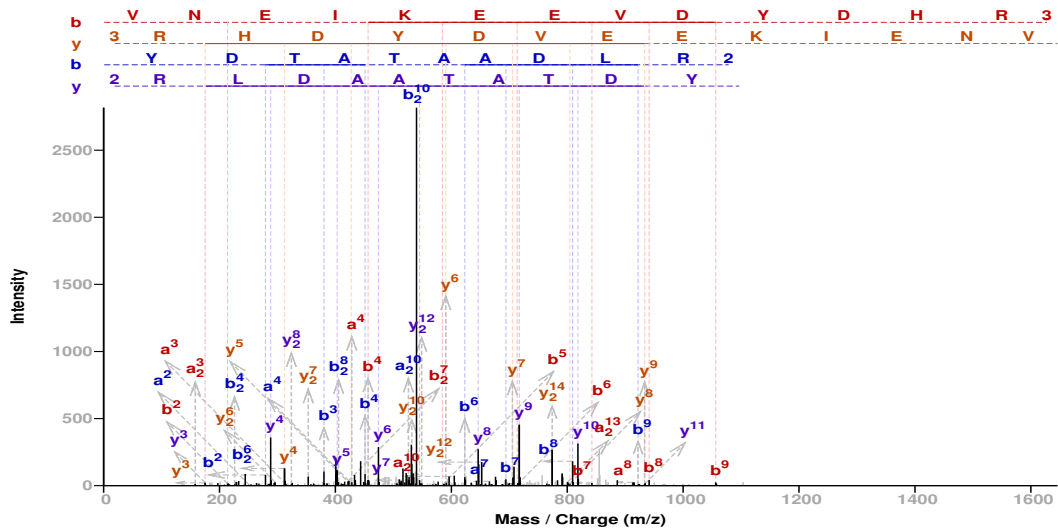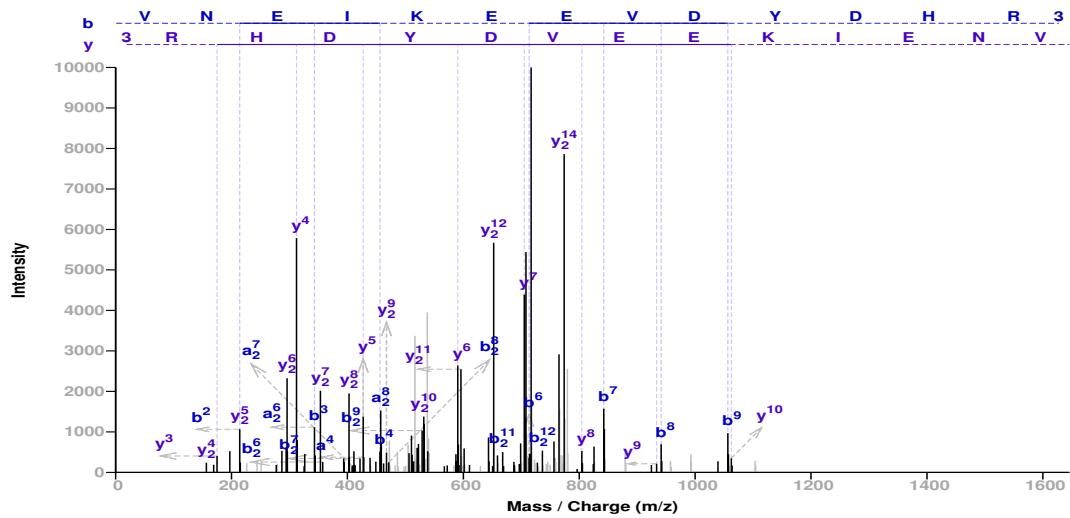

yeast00\_Scan\_Number\_5697 Precursor m/z: 508.808 cosine: 0.860  $\alpha$ : 0.190

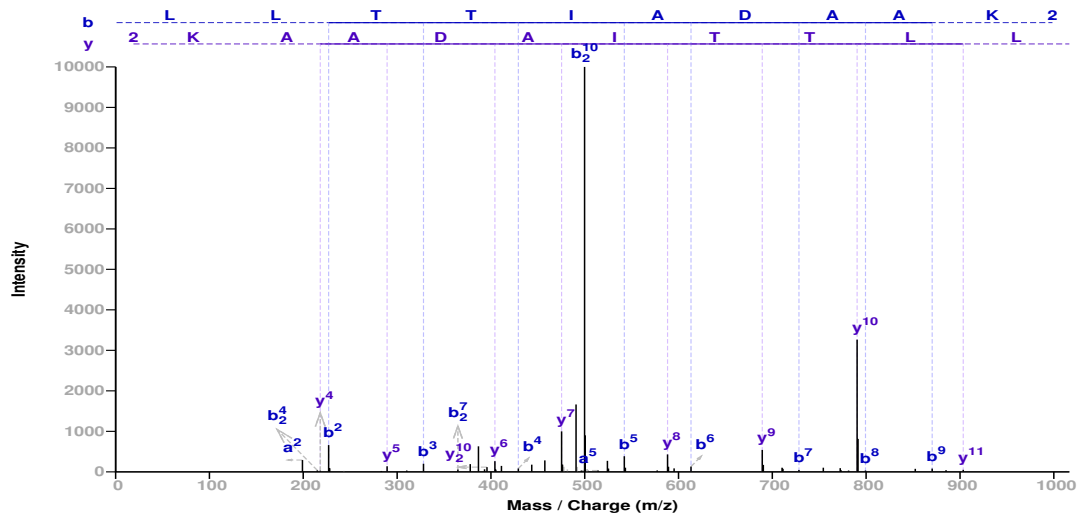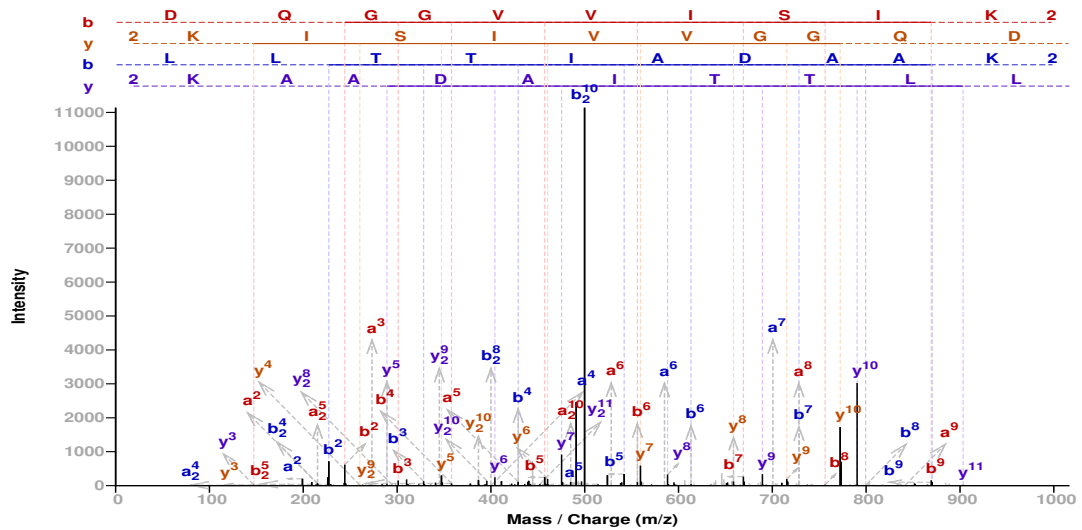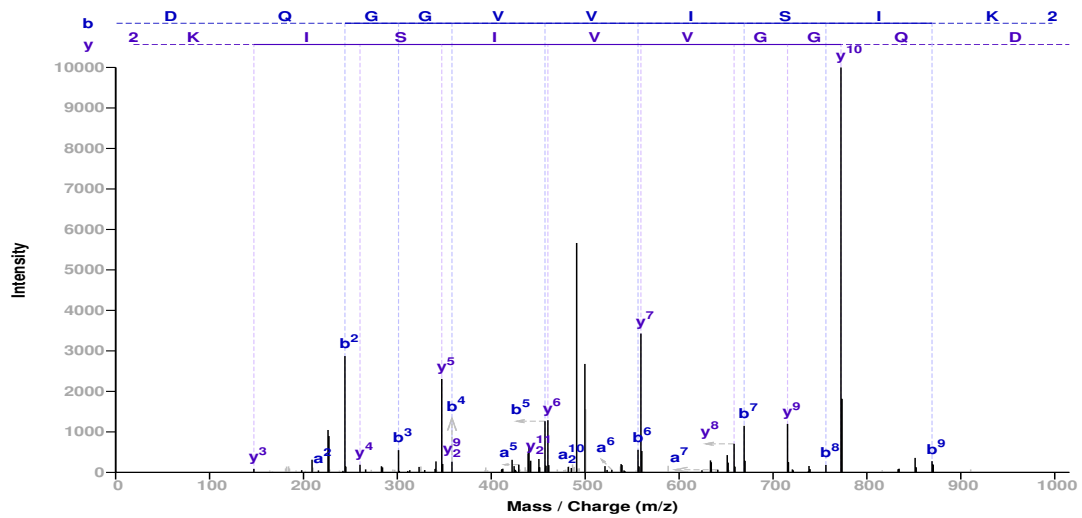



yeast00\_Scan\_Number\_5338 Precursor m/z: 419.219 cosine: 0.765  $\alpha$ : 0.188

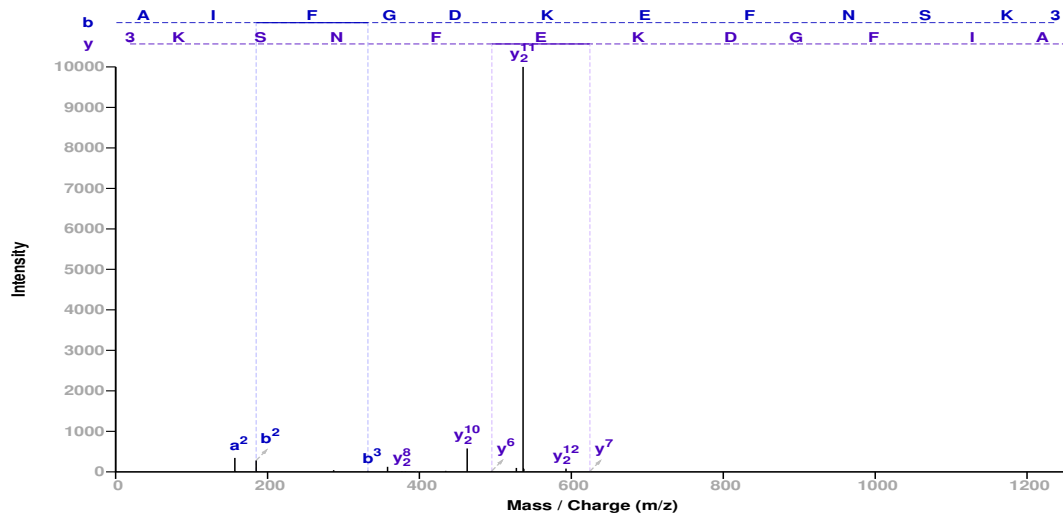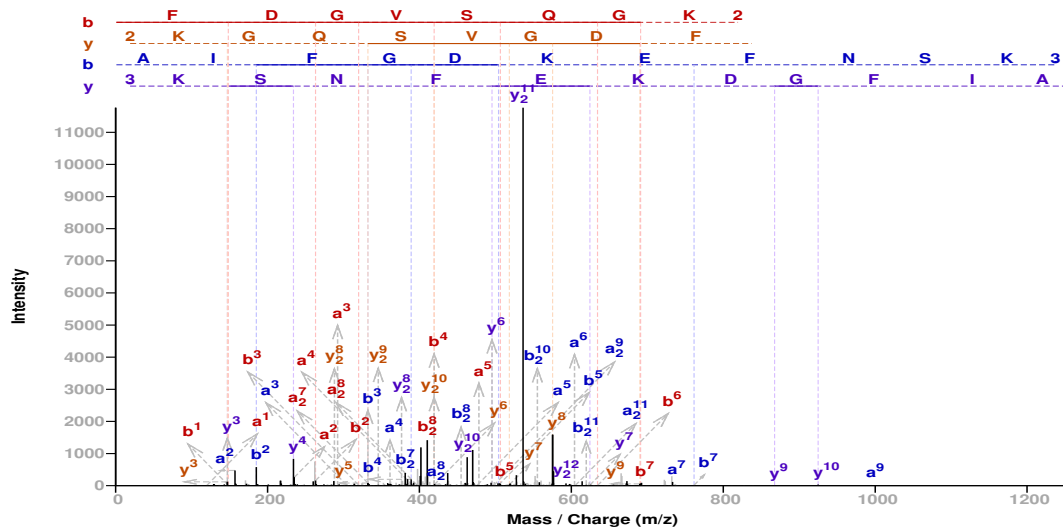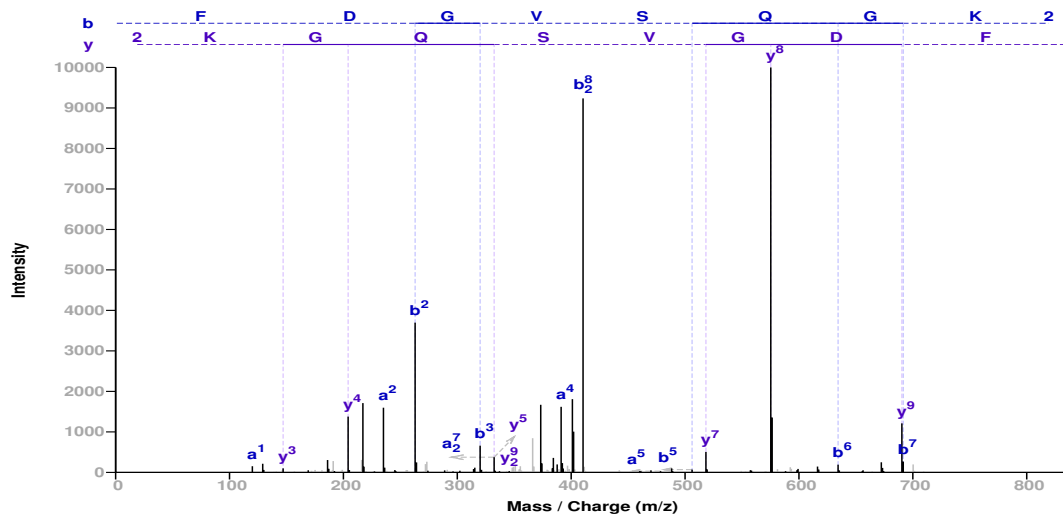



yeast00\_Scan\_Number\_2252 Precursor m/z: 415.726 cosine: 0.782  $\alpha$ : 0.186

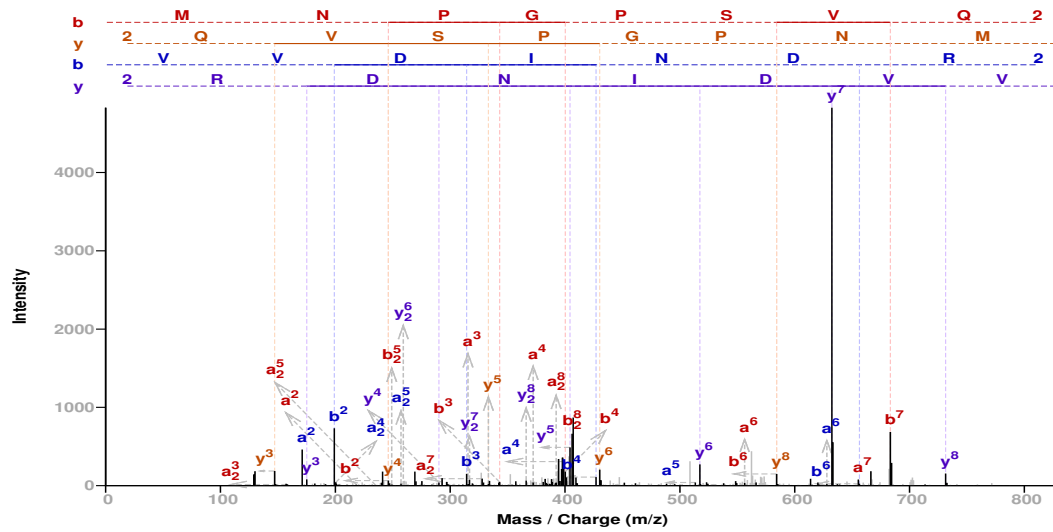



yeast00.Scan\_Number\_5134 Precursor m/z: 580.597 cosine: 0.930  $\alpha$ : 0.176

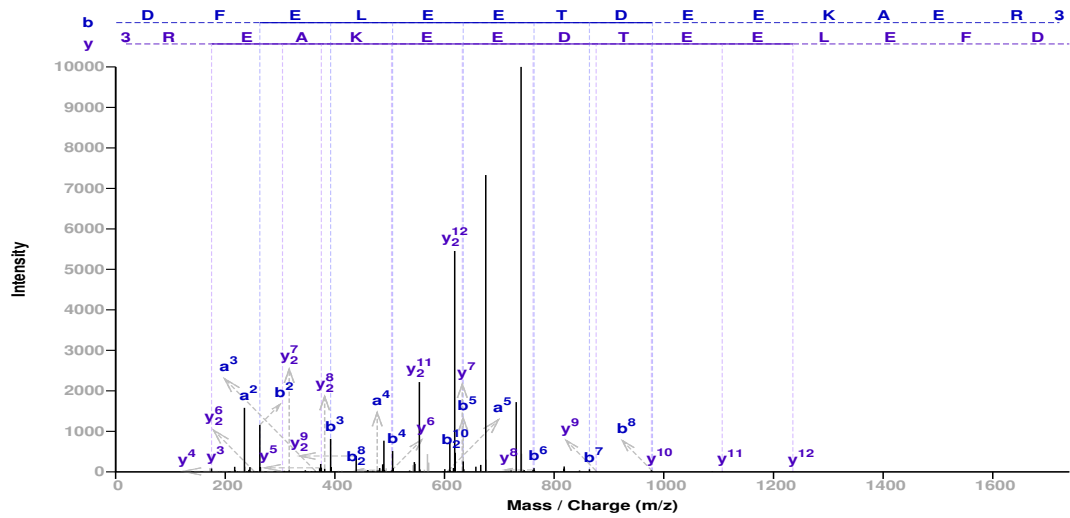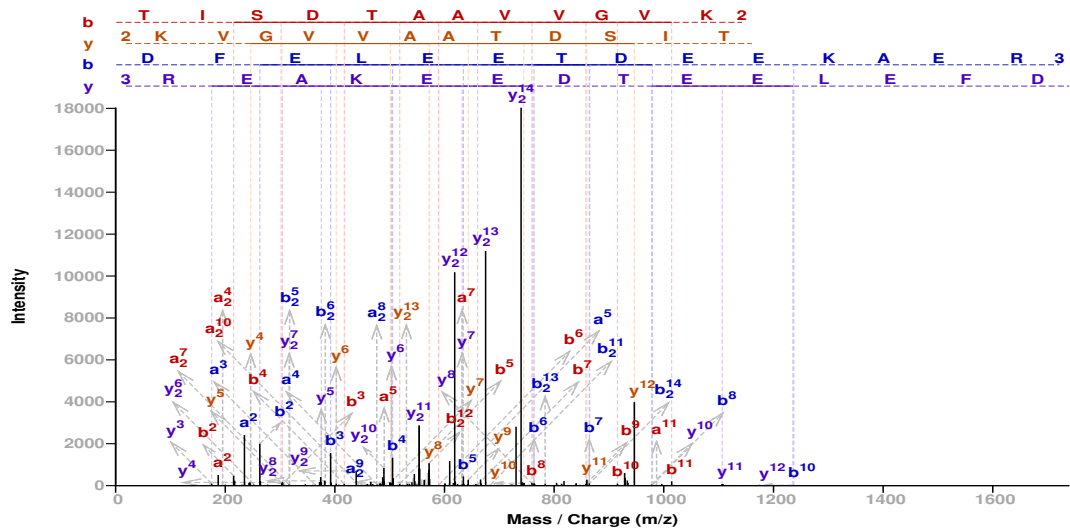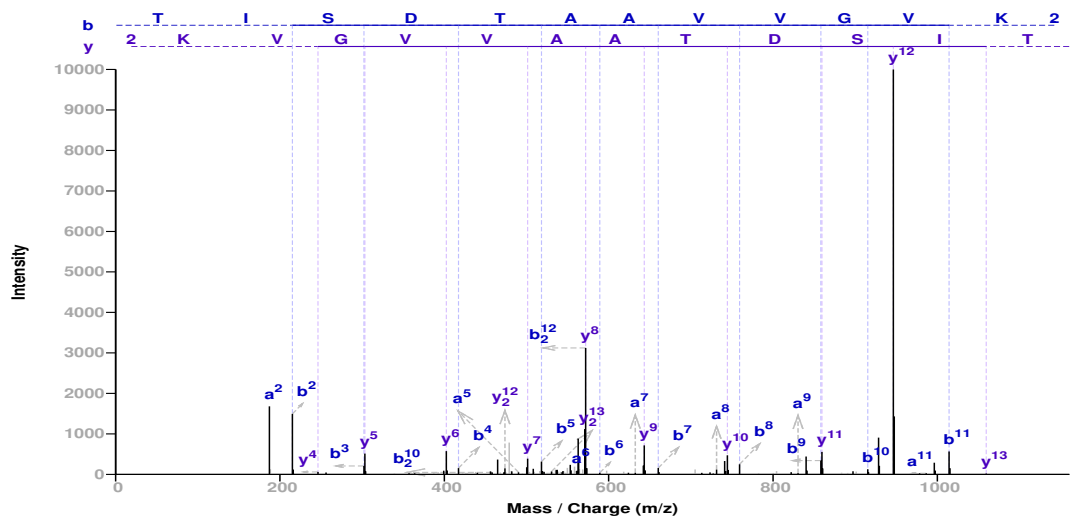

yeast00\_Scan\_Number\_6901 Precursor m/z: 722.895 cosine: 0.908  $\alpha$ : 0.176

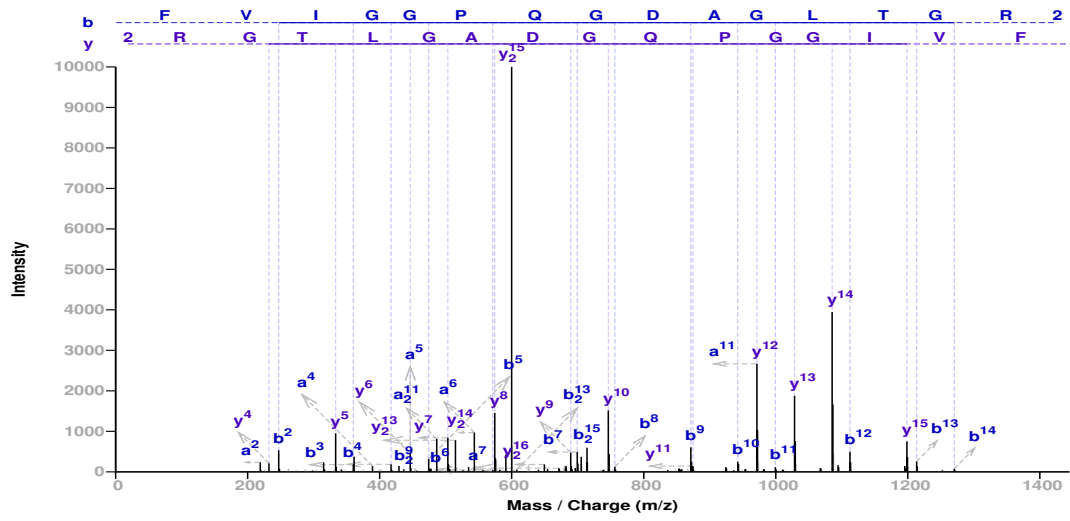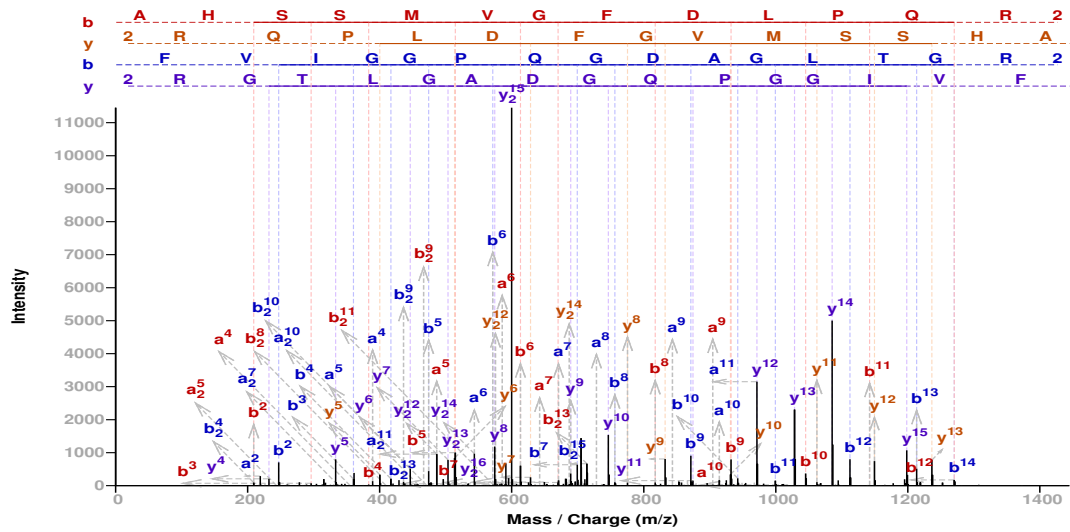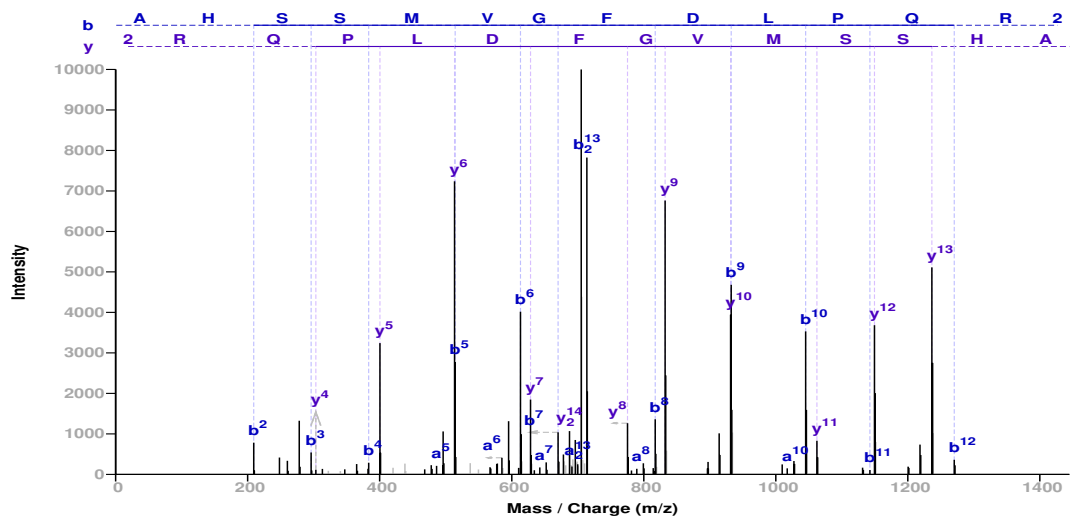

yeast00\_Scan\_Number\_1643 Precursor m/z: 520.268 cosine: 0.844  $\alpha$ : 0.175

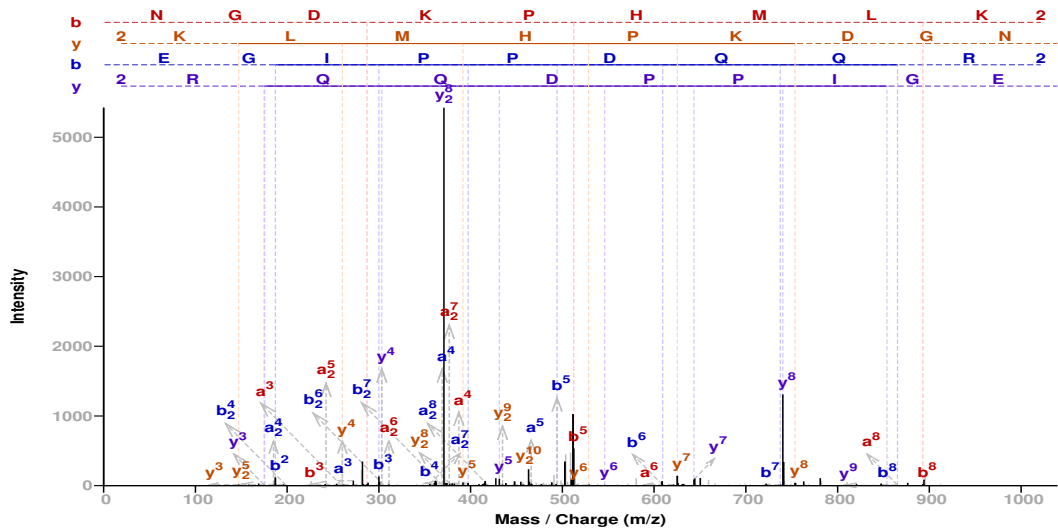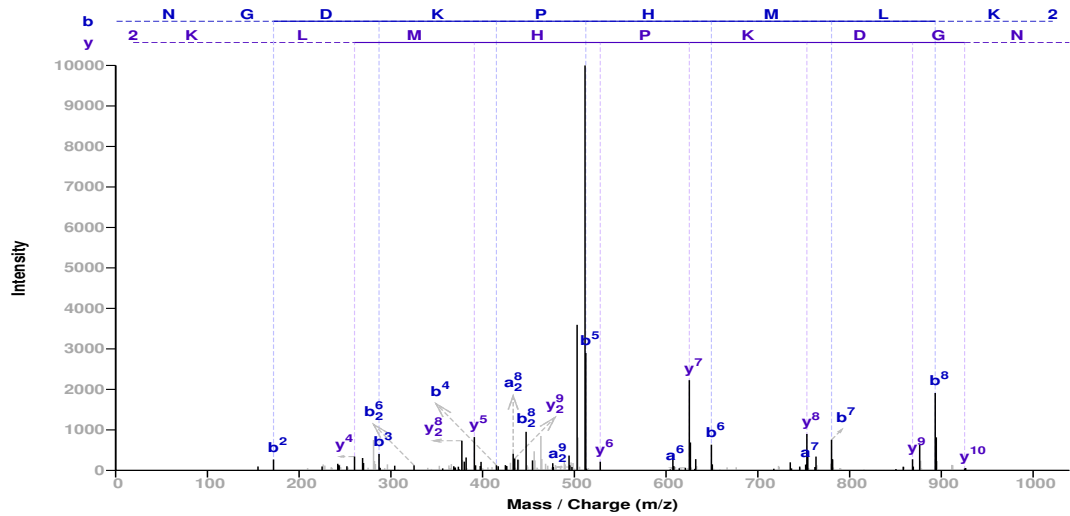





yeast00\_Scan\_Number\_3697 Precursor m/z: 352.215 cosine: 0.907  $\alpha$ : 0.171

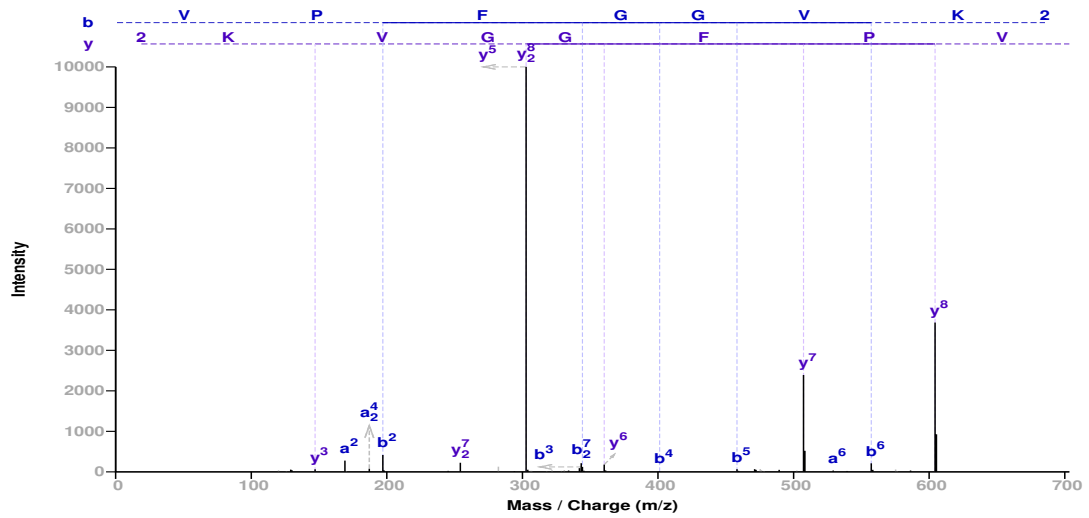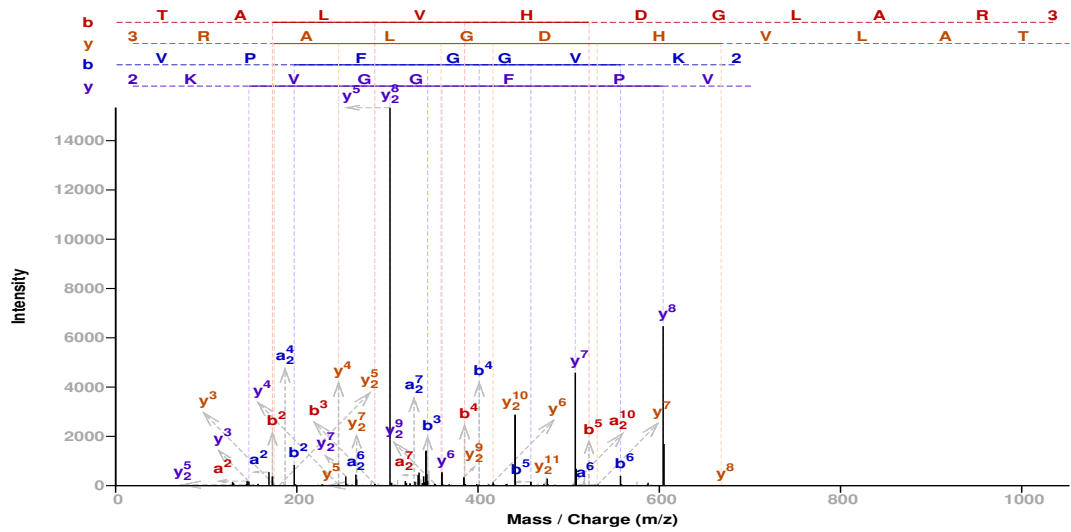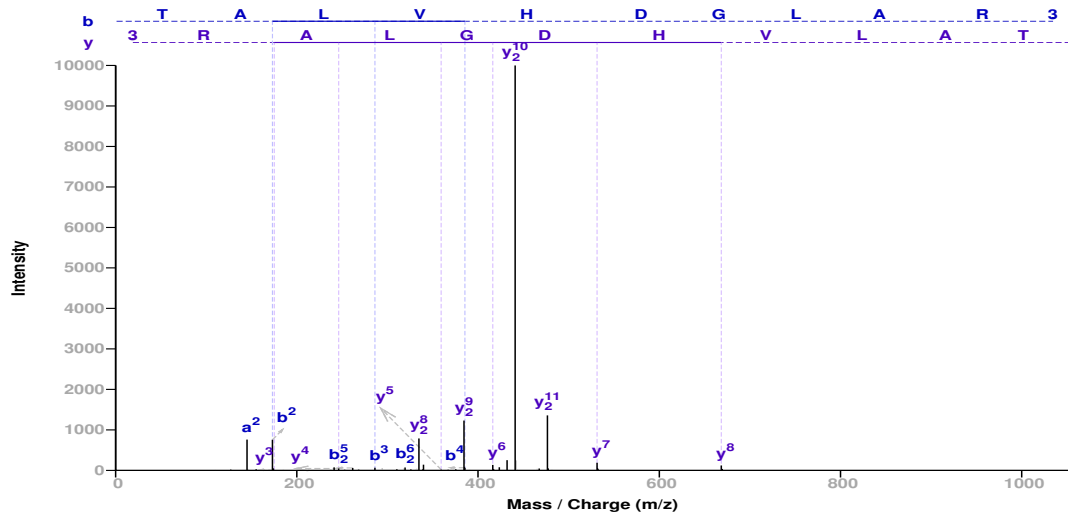

yeast00\_Scan\_Number\_4001 Precursor m/z: 519.764 cosine: 0.781  $\alpha$ : 0.170

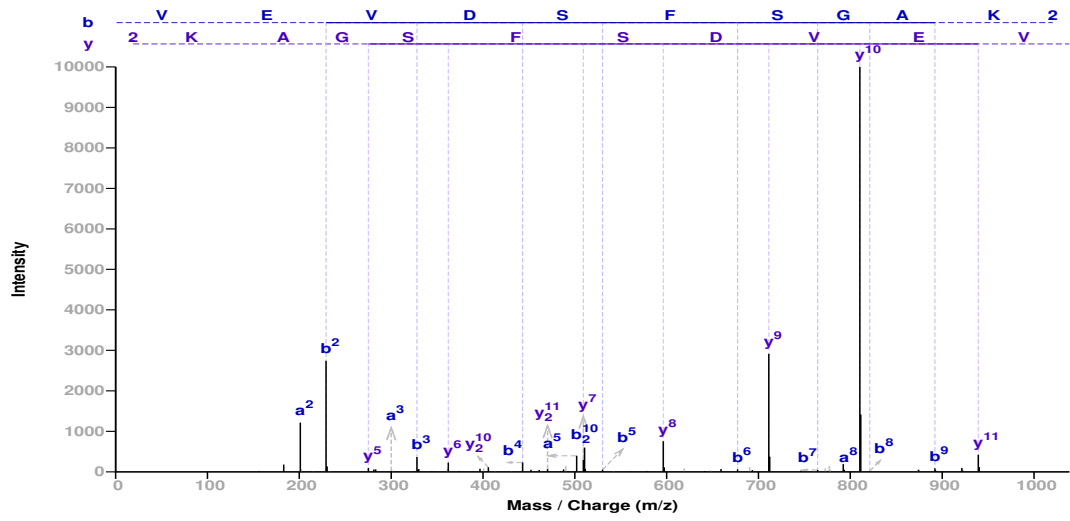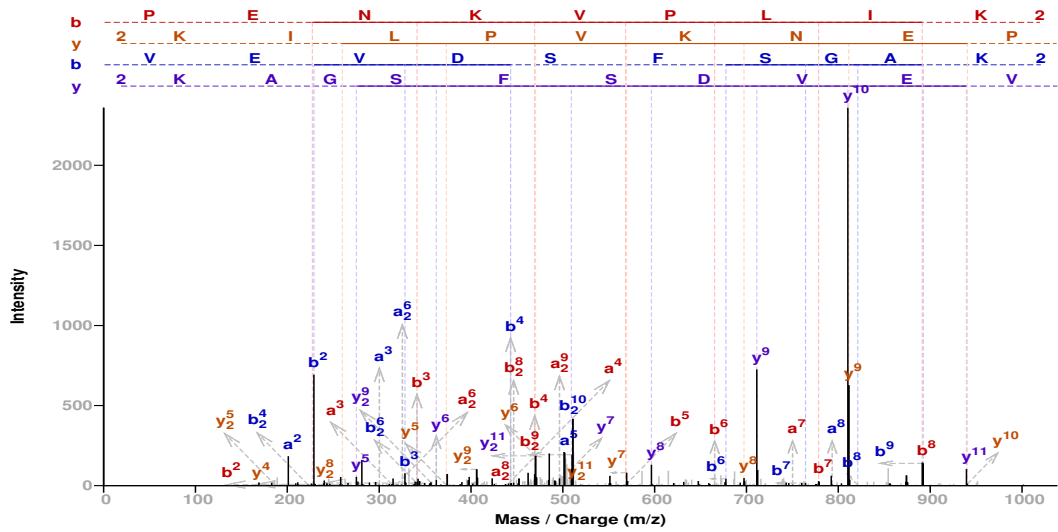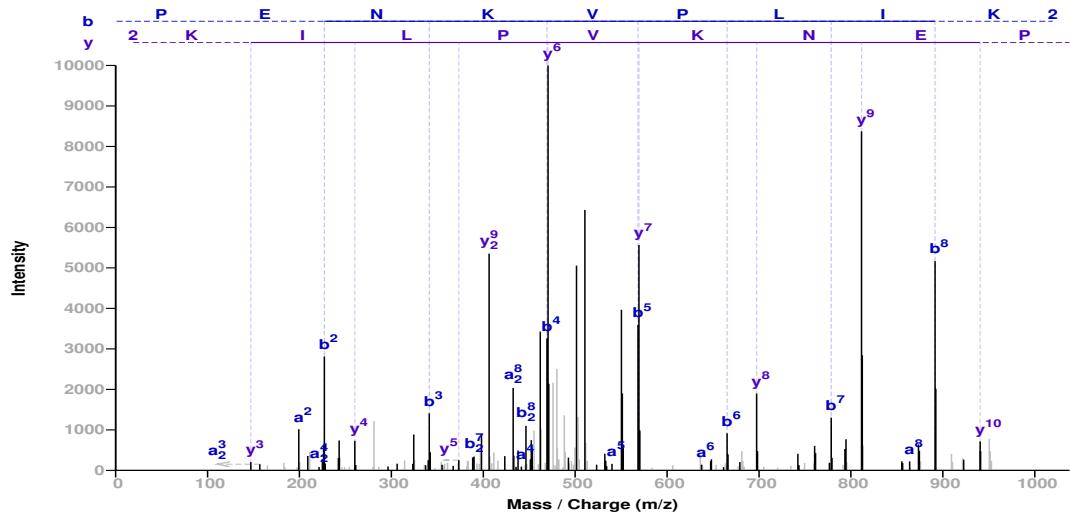

yeast00\_Scan\_Number\_8189 Precursor m/z: 596.674 cosine: 0.807  $\alpha$ : 0.170

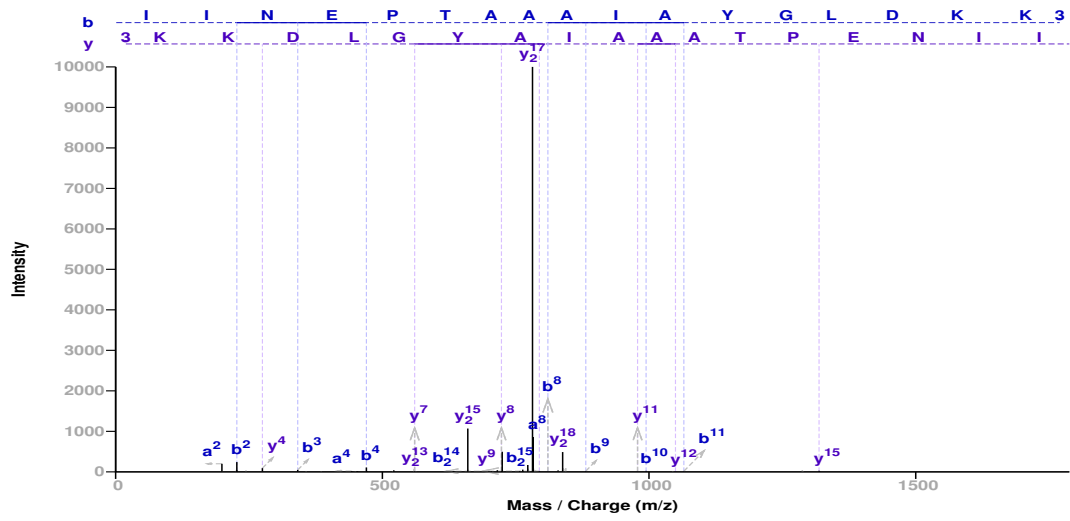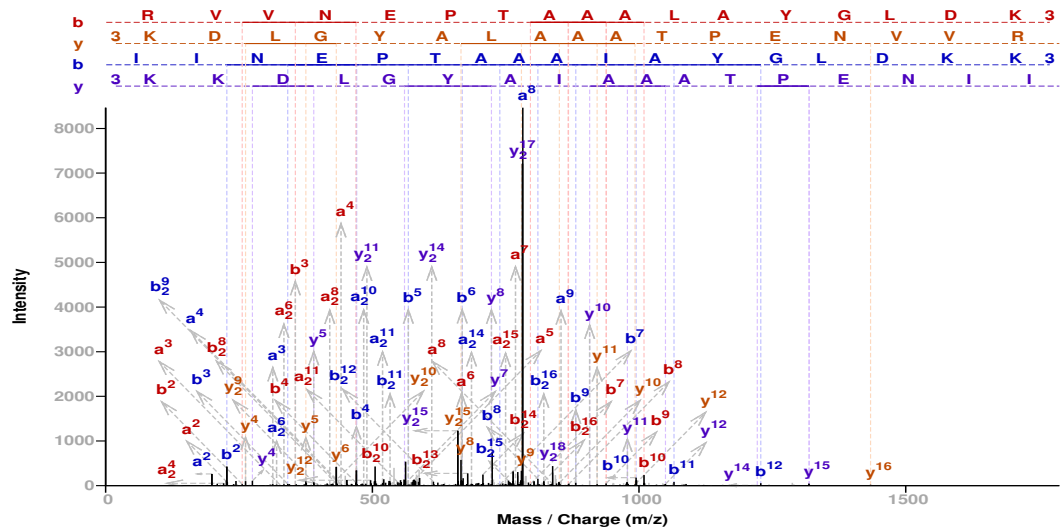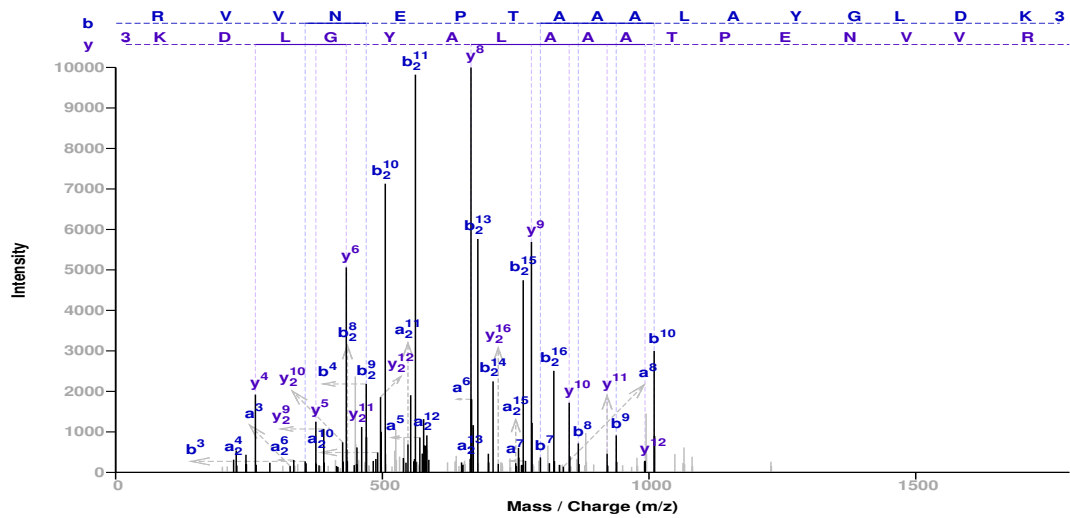

yeast00\_Scan\_Number\_6865 Precursor m/z: 813.373 cosine: 0.821  $\alpha$ : 0.169

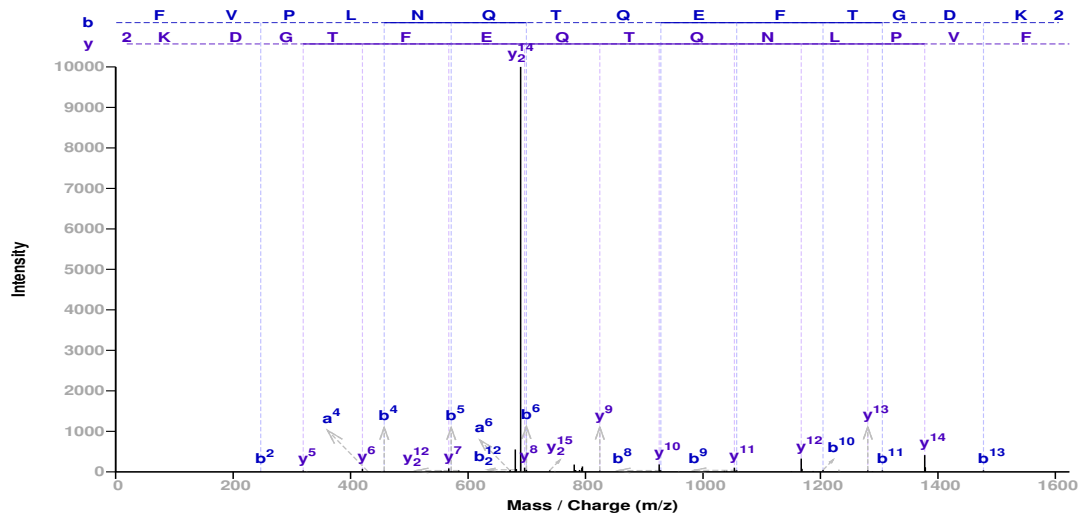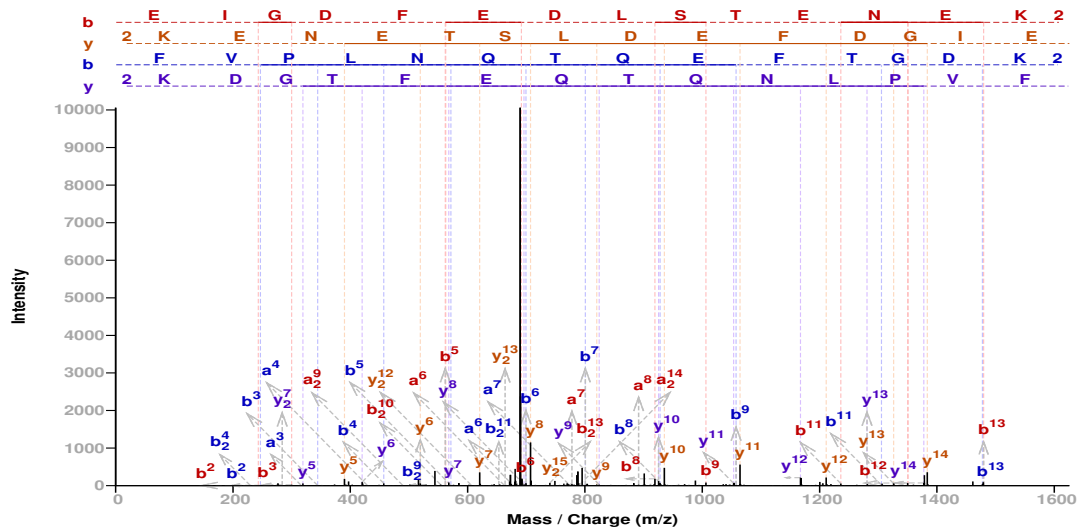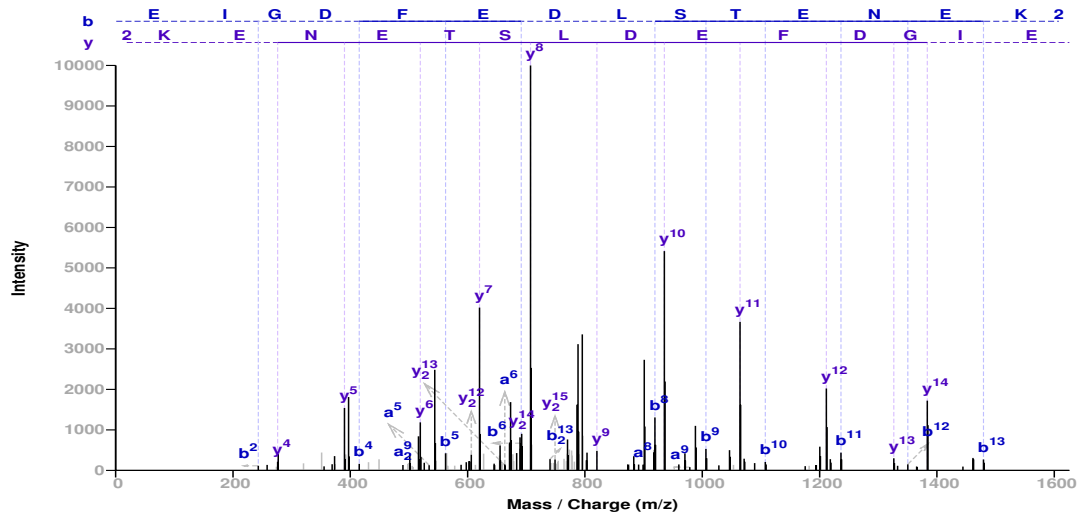

yeast00\_Scan\_Number\_5640 Precursor m/z: 506.622 cosine: 0.837  $\alpha$ : 0.158

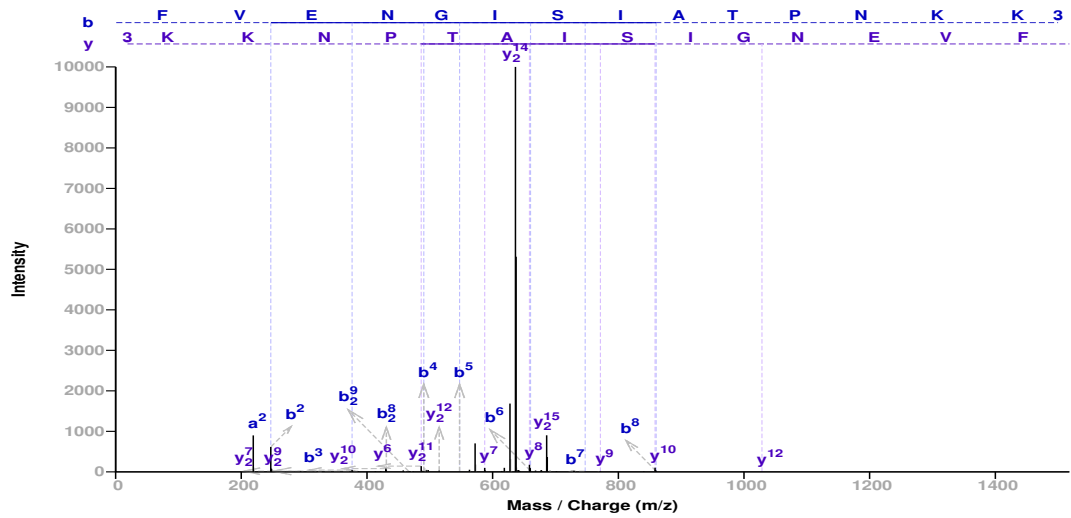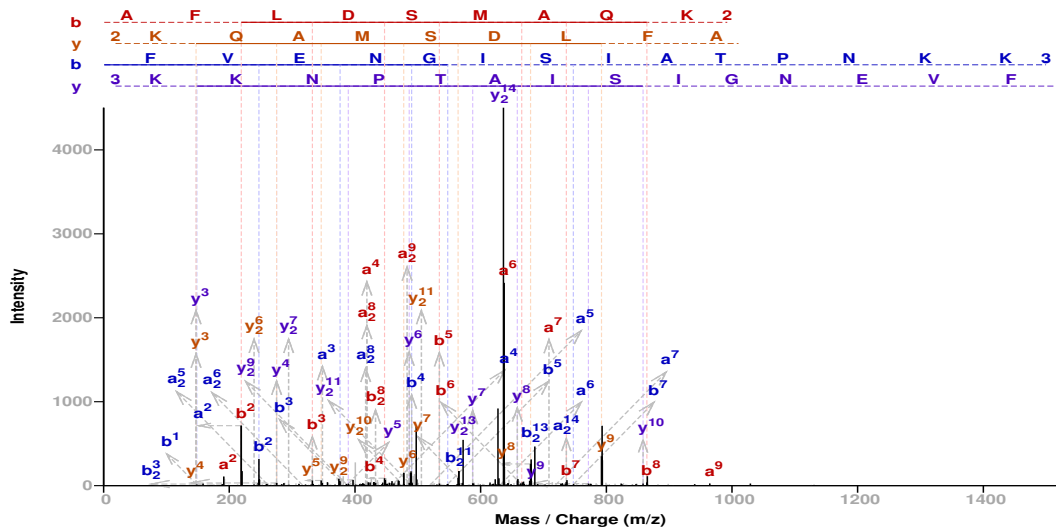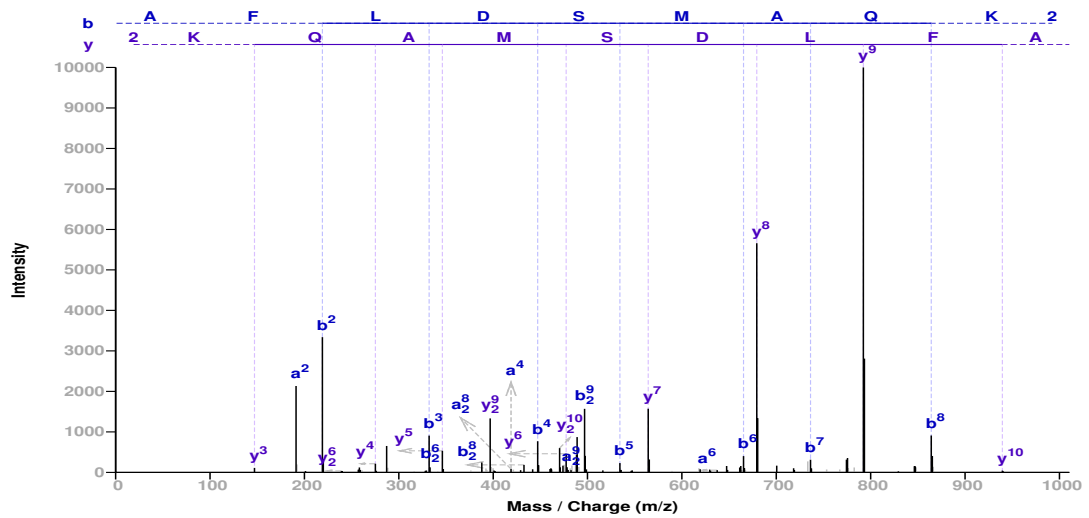



yeast00\_Scan\_Number\_7523 Precursor m/z: 414.260 cosine: 0.793  $\alpha$ : 0.141

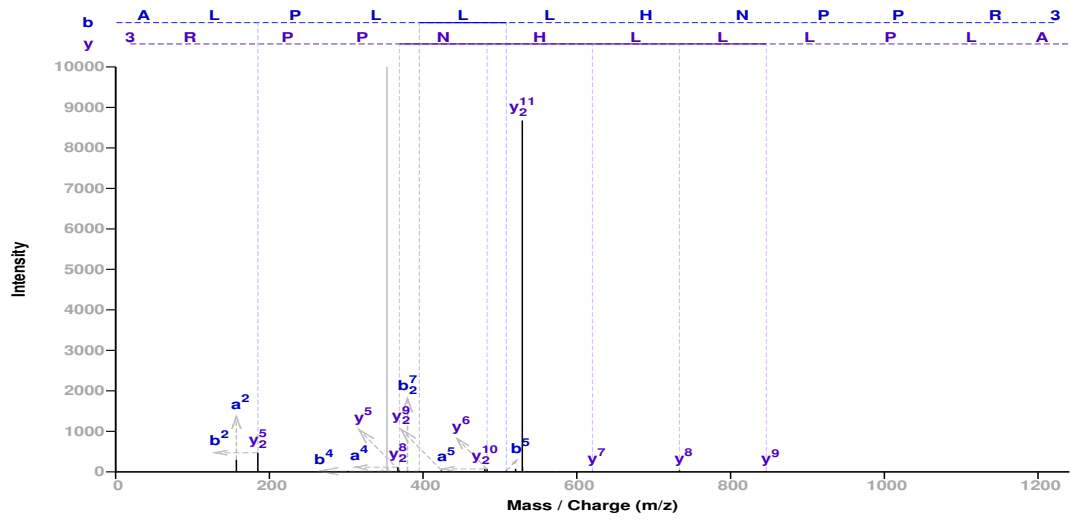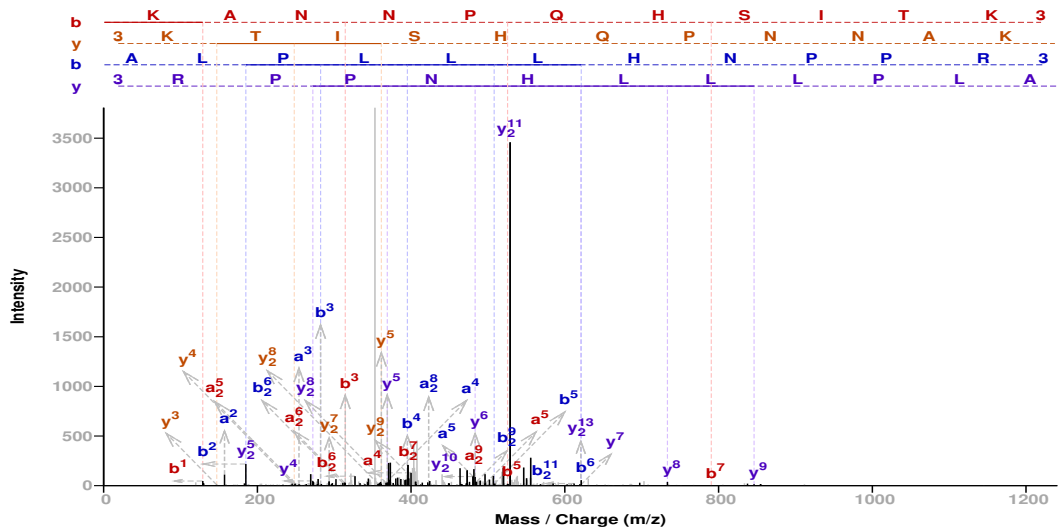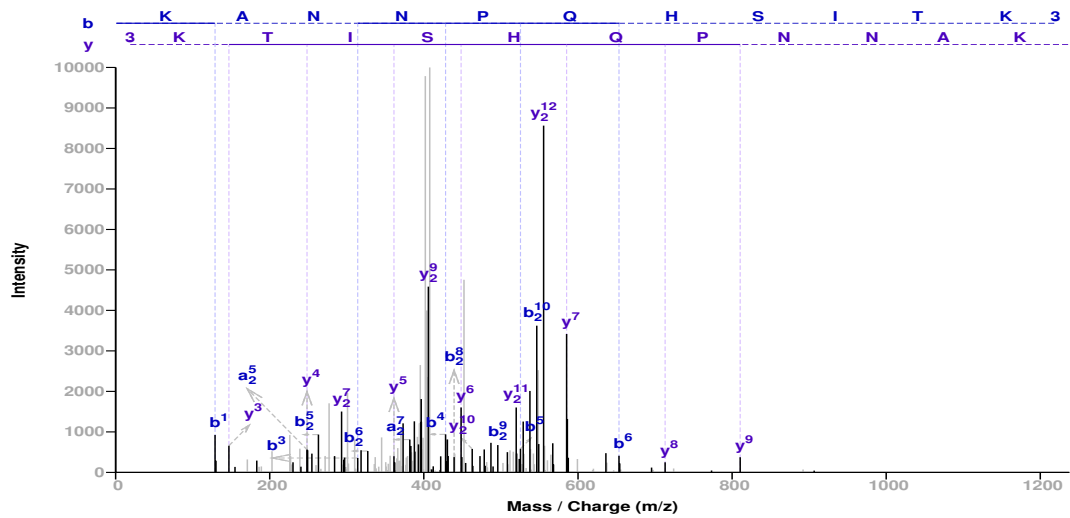

yeast00\_Scan\_Number\_3089 Precursor m/z: 464.598 cosine: 0.853  $\alpha$ : 0.134

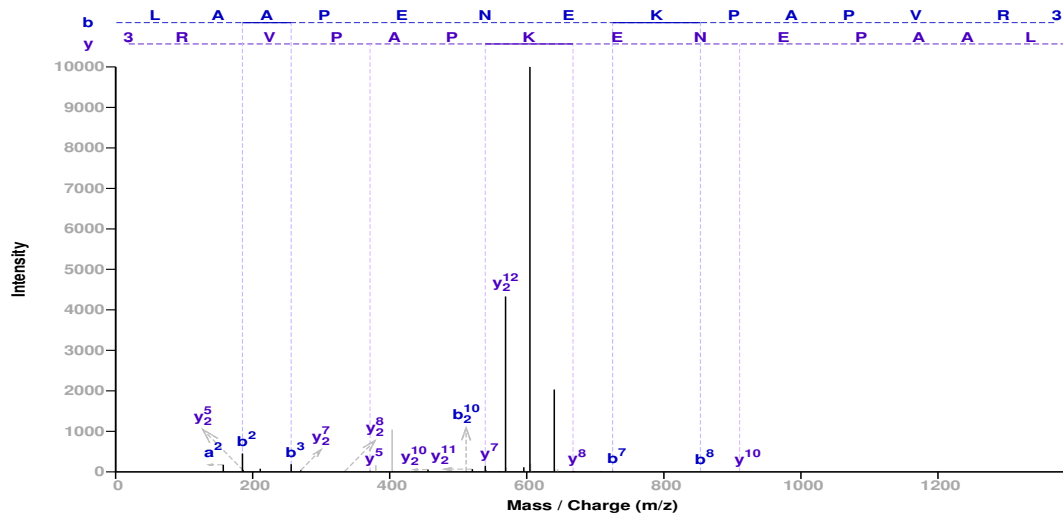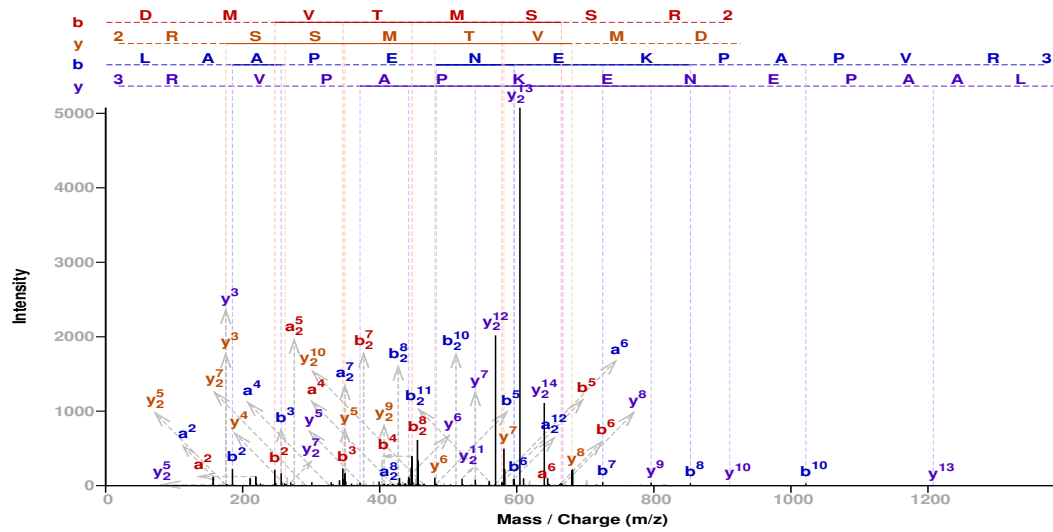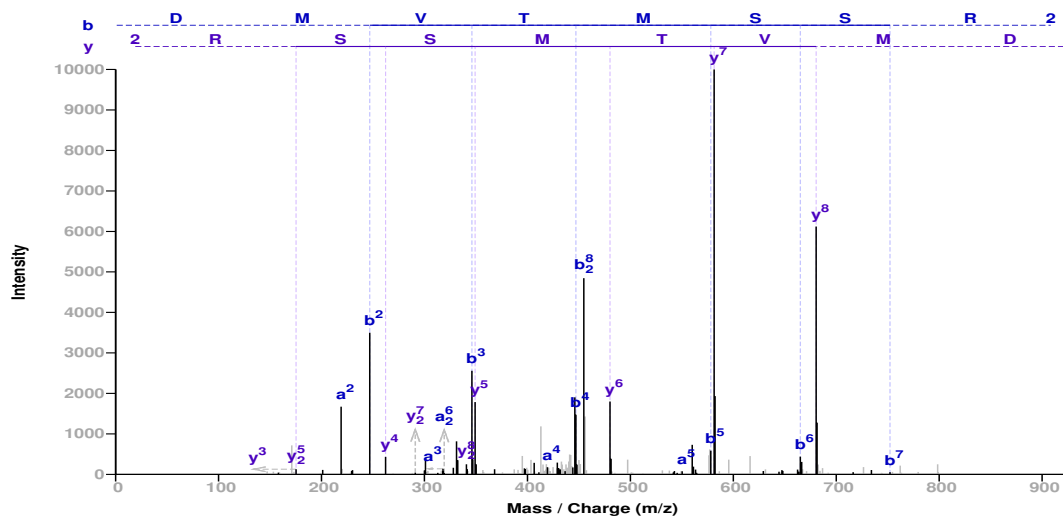



yeast00\_Scan\_Number\_7728 Precursor m/z: 676.865 cosine: 0.876  $\alpha$ : 0.124

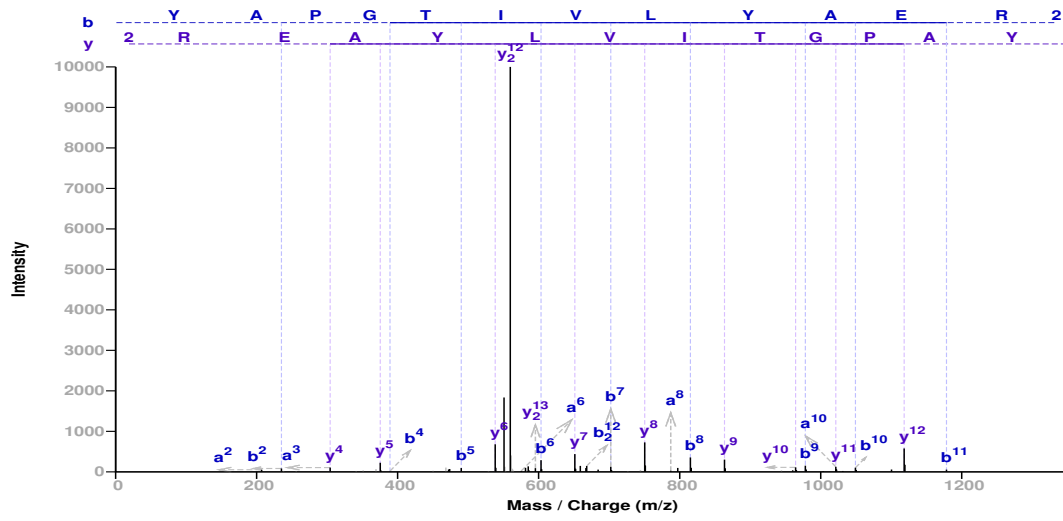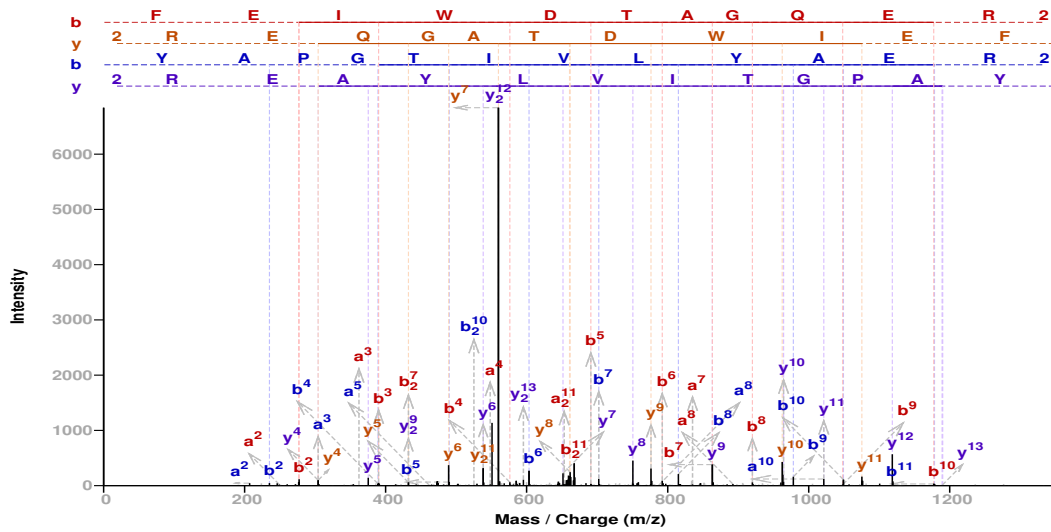

yeast00\_Scan\_Number\_1458 Precursor m/z: 440.734 cosine: 0.880  $\alpha$ : 0.106

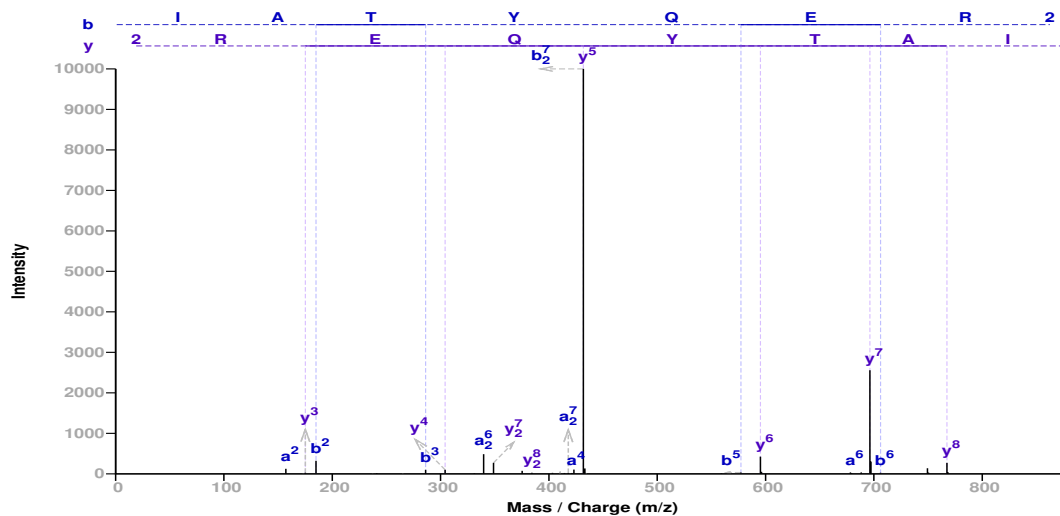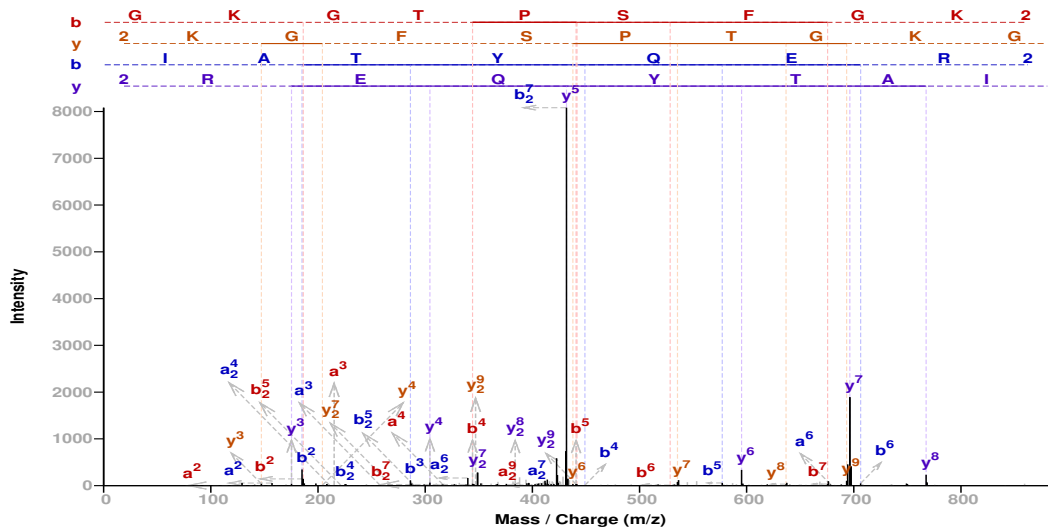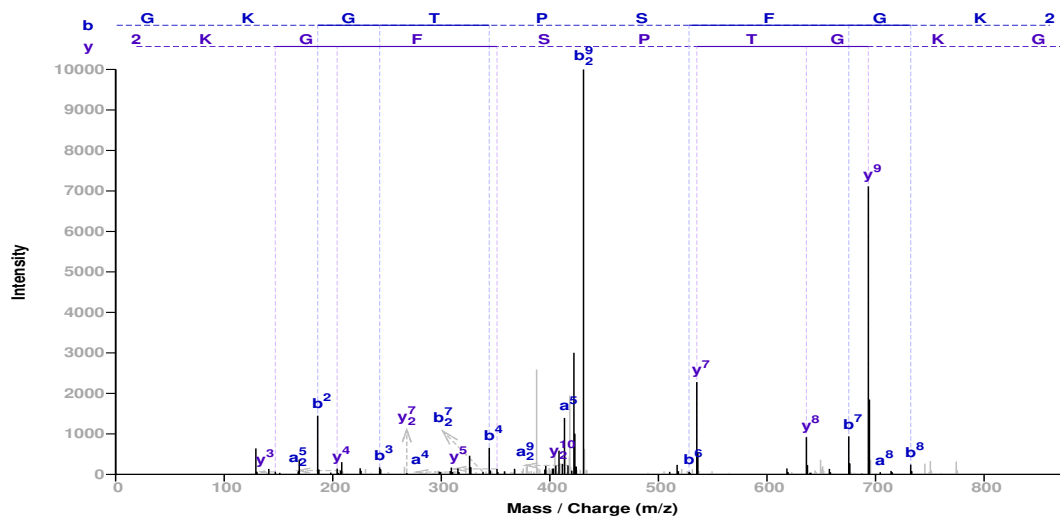

yeast00\_Scan\_Number\_4616 Precursor m/z: 412.880 cosine: 0.956  $\alpha$ : 0.104

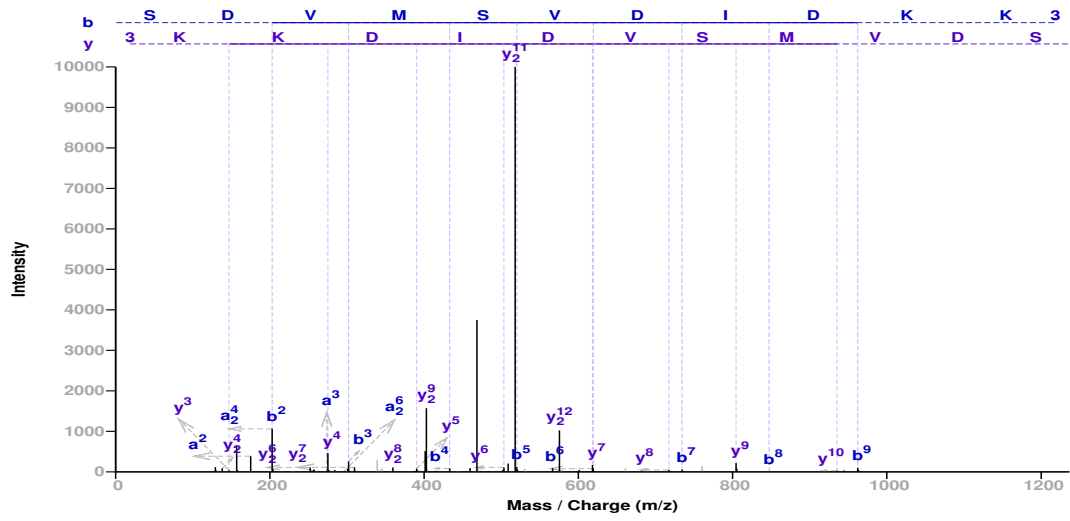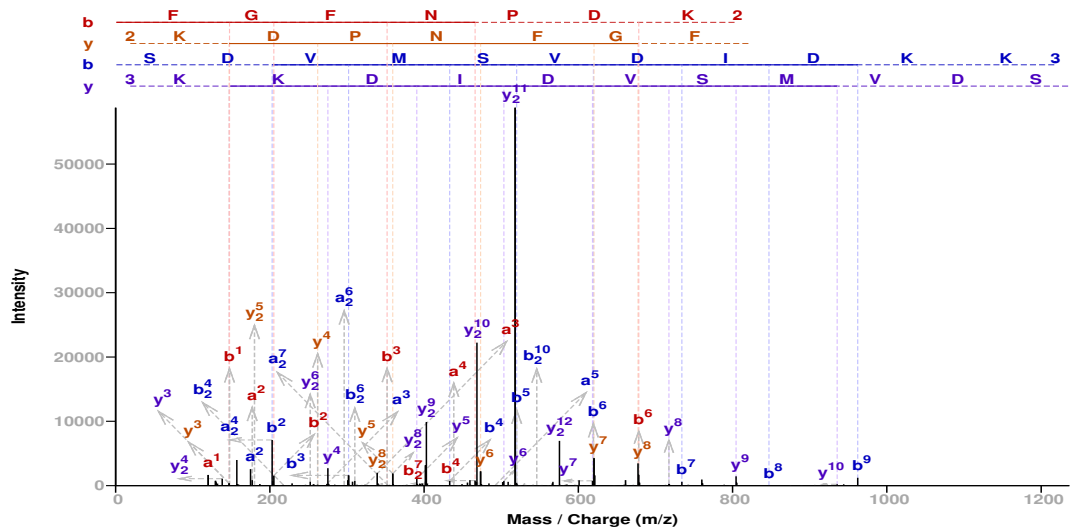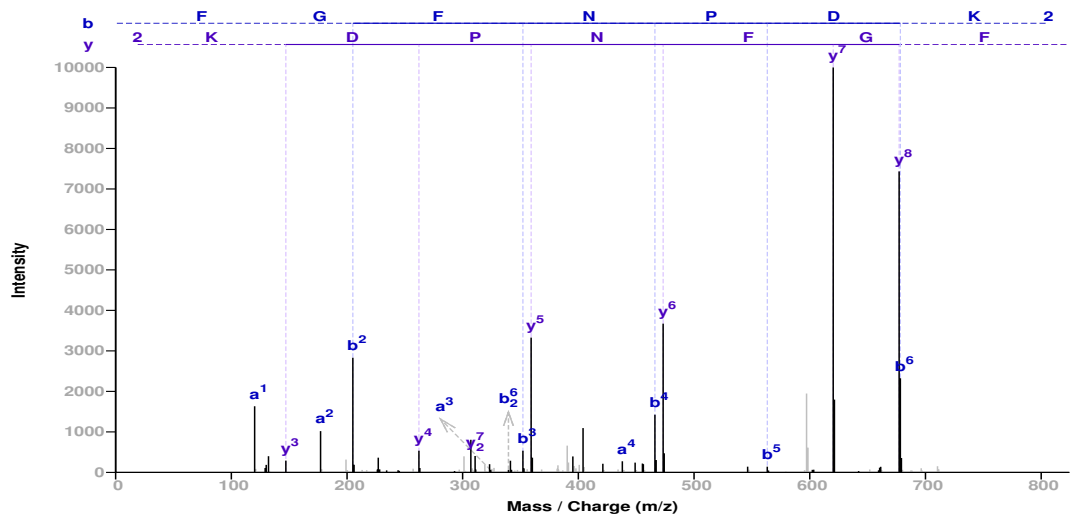

yeast00.Scan\_Number\_10158 Precursor m/z: 630.721 cosine: 0.821  $\alpha$ : 0.100

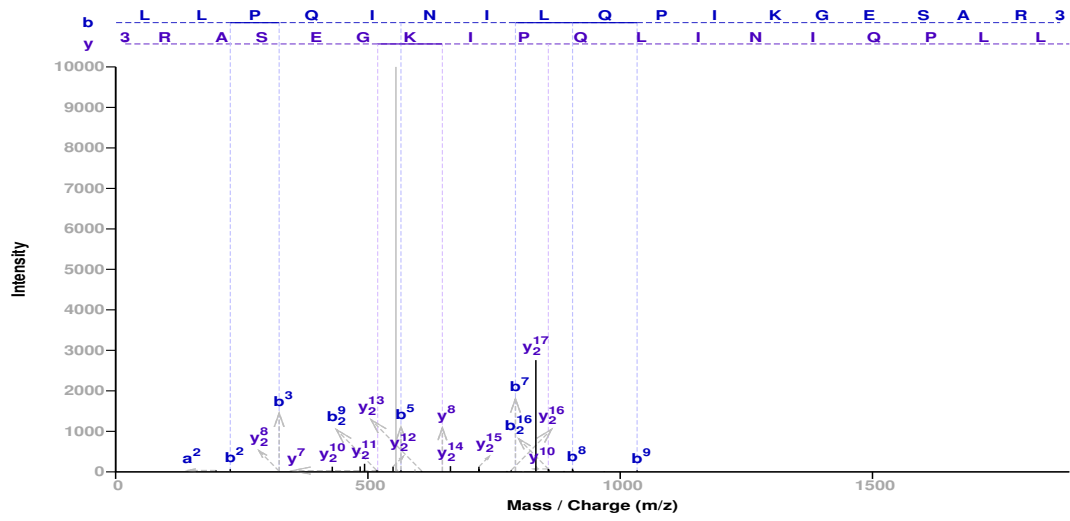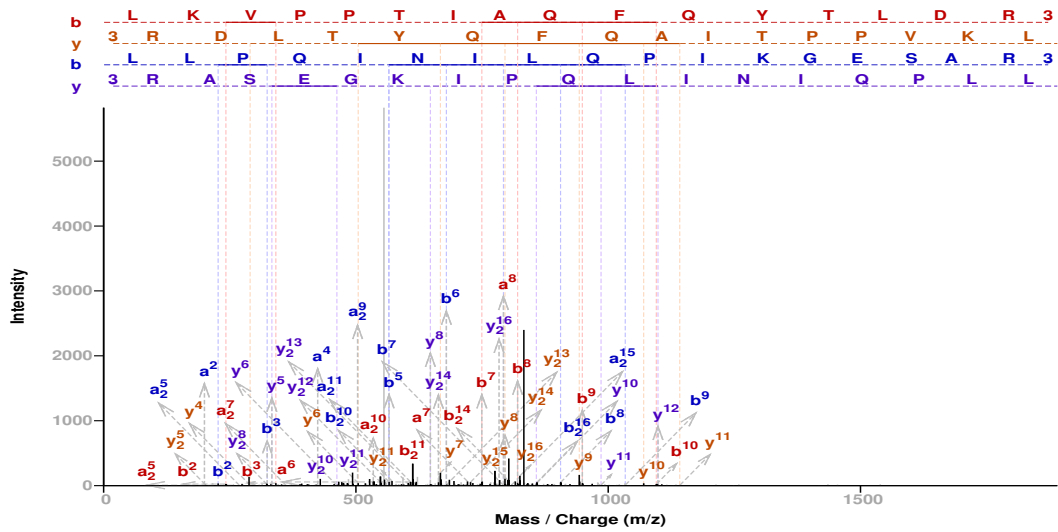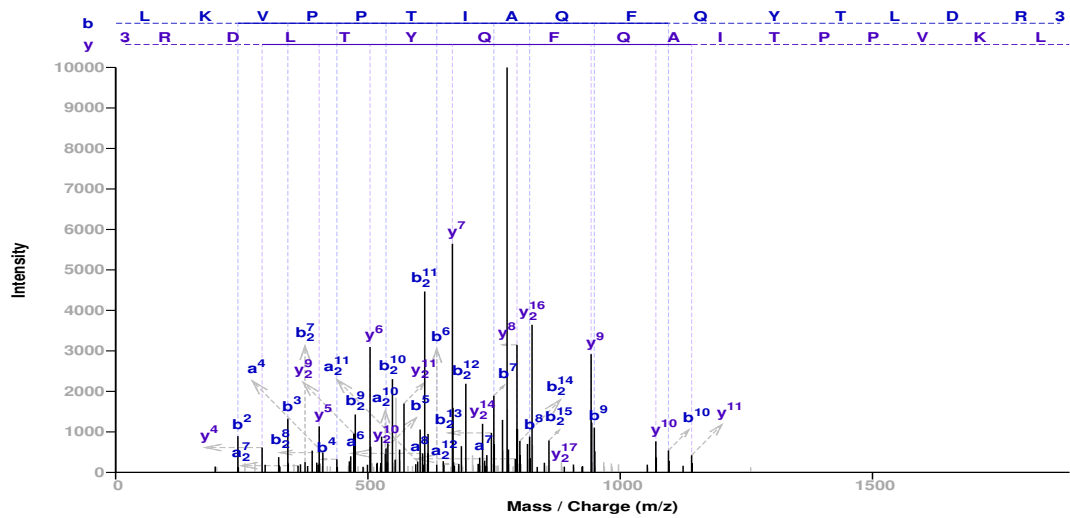

yeast00\_Scan\_Number\_5400 Precursor m/z: 374.565 cosine: 0.882  $\alpha$ : 0.100

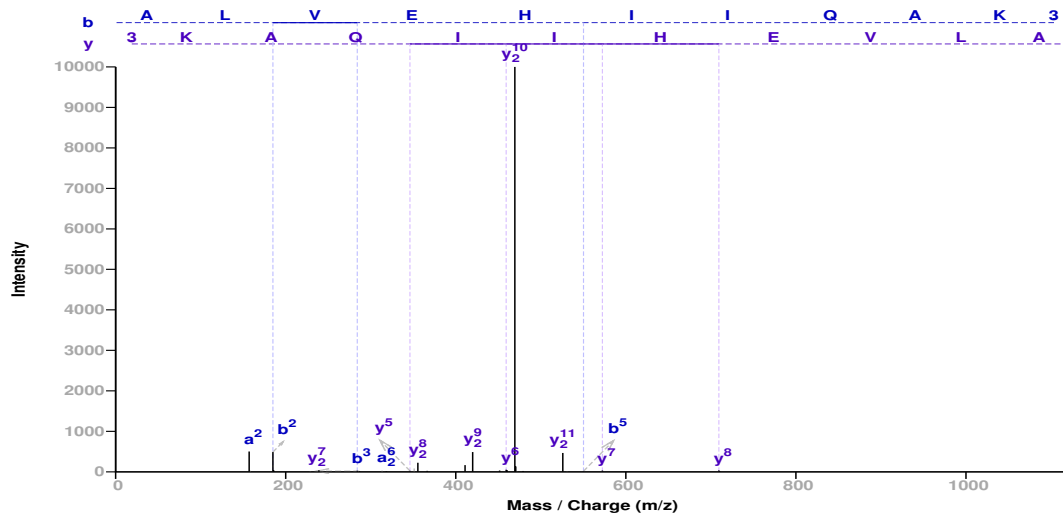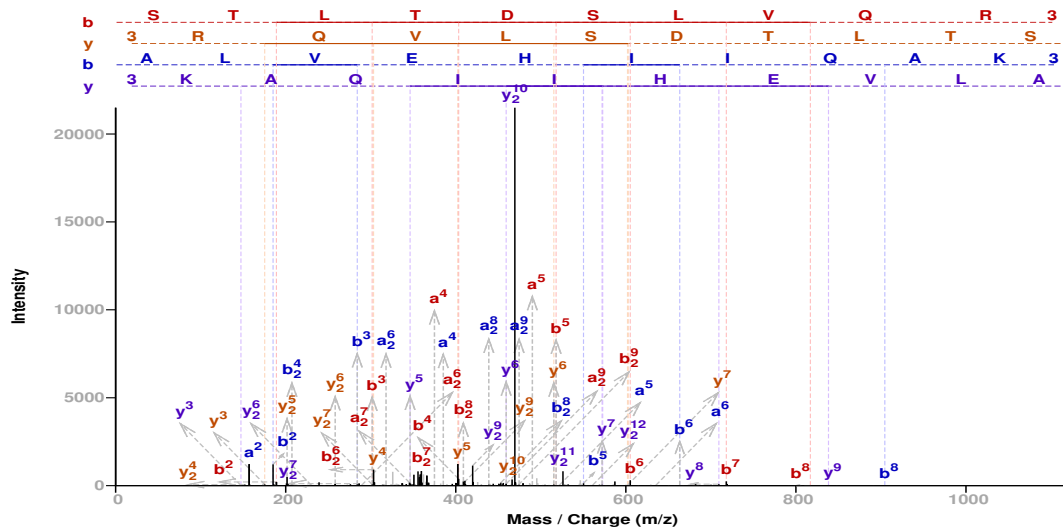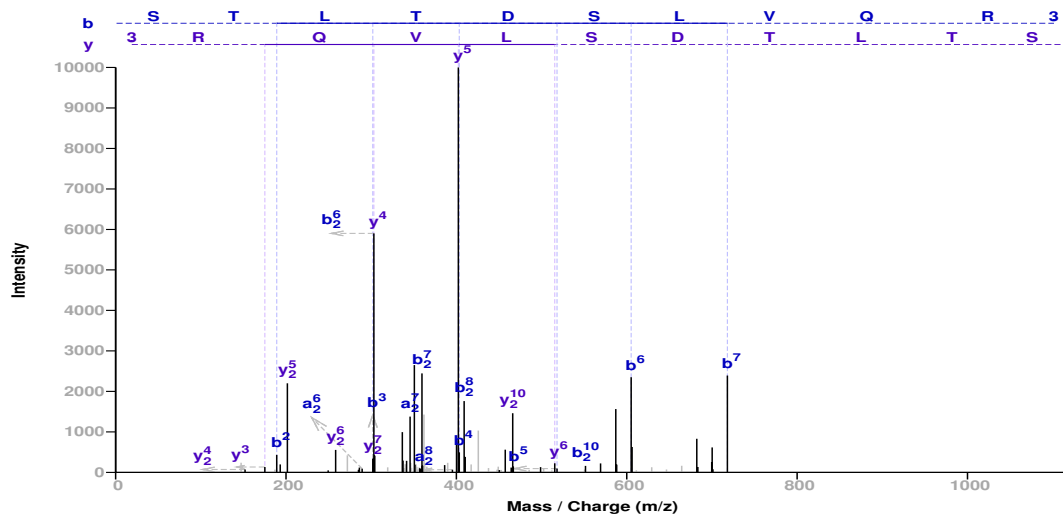

yeast01\_Scan\_Number\_6484 Precursor m/z: 556.302 cosine: 0.780  $\alpha$ : 0.994

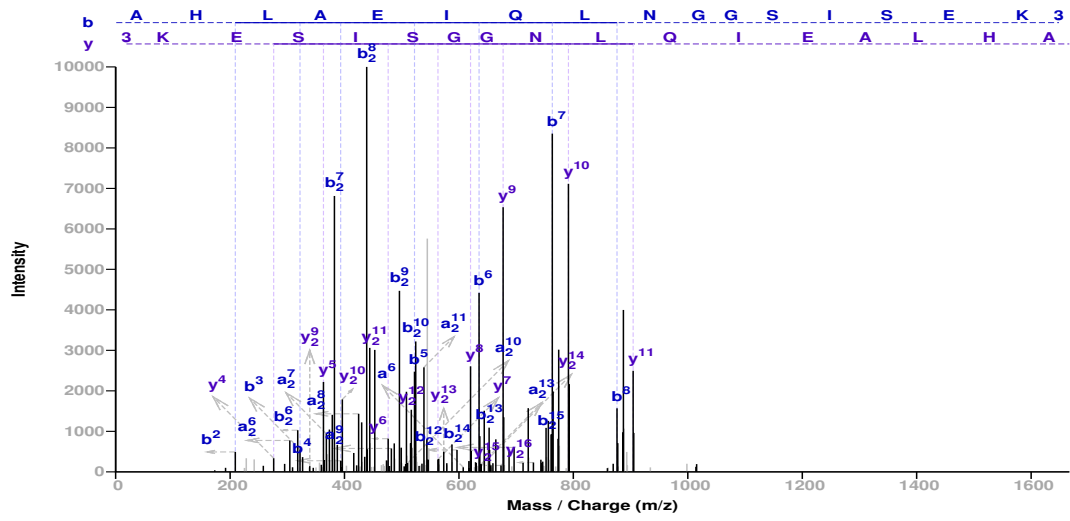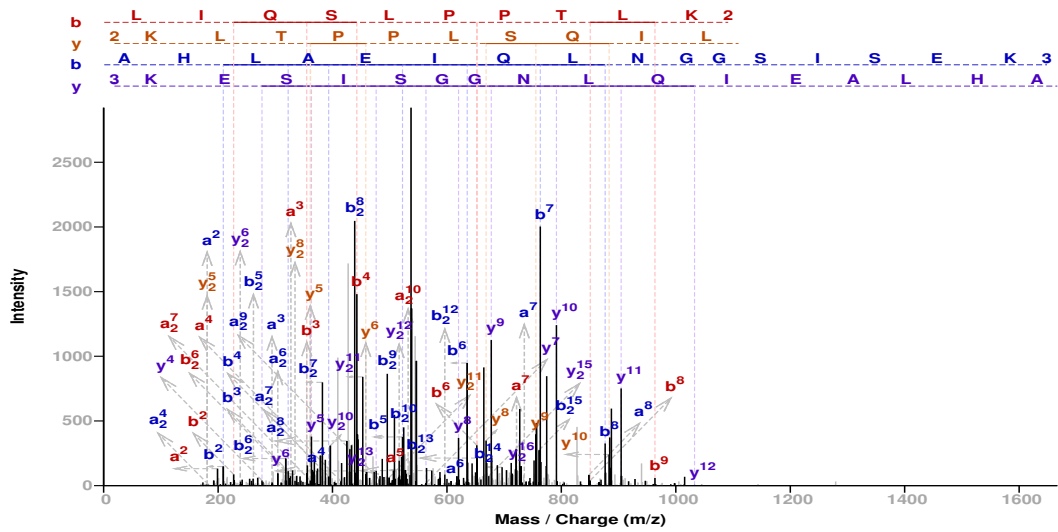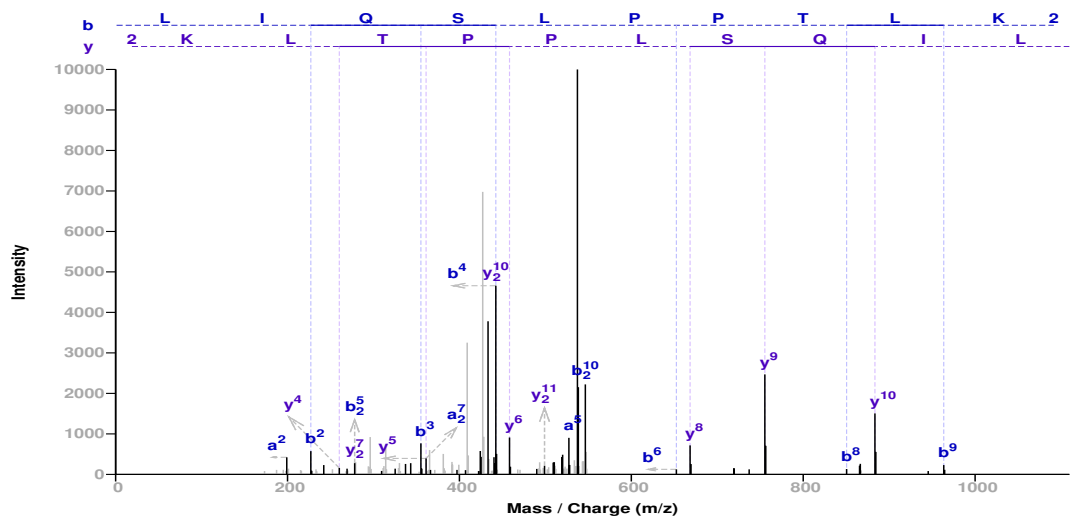

yeast01\_Scan\_Number\_3279 Precursor m/z: 493.291 cosine: 0.864  $\alpha$ : 0.982

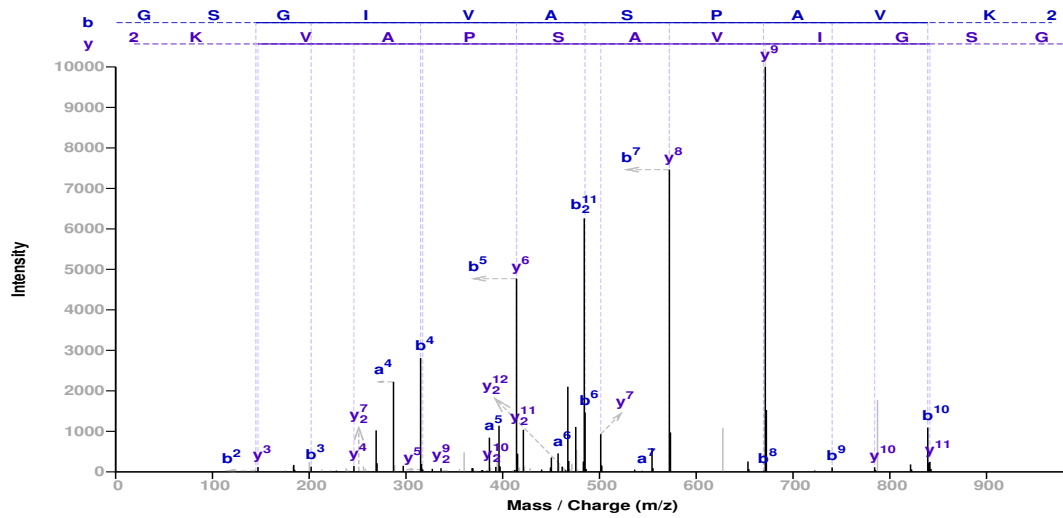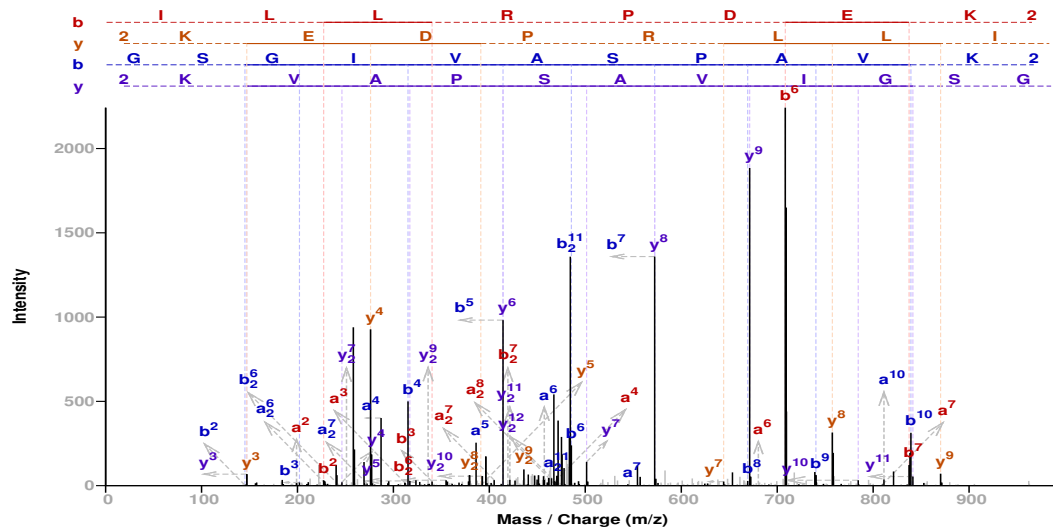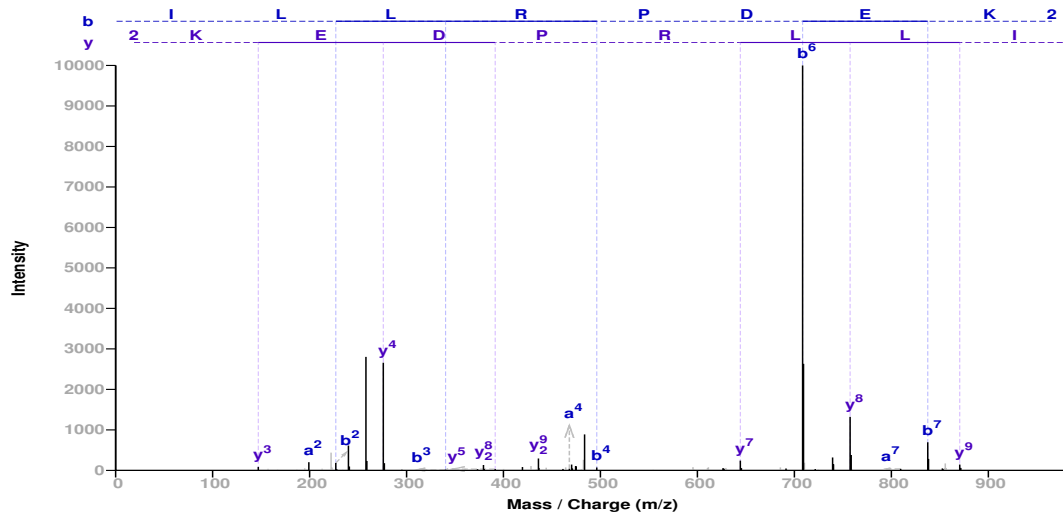

yeast01\_Scan\_Number\_6177 Precursor m/z: 694.377 cosine: 0.795  $\alpha$ : 0.974

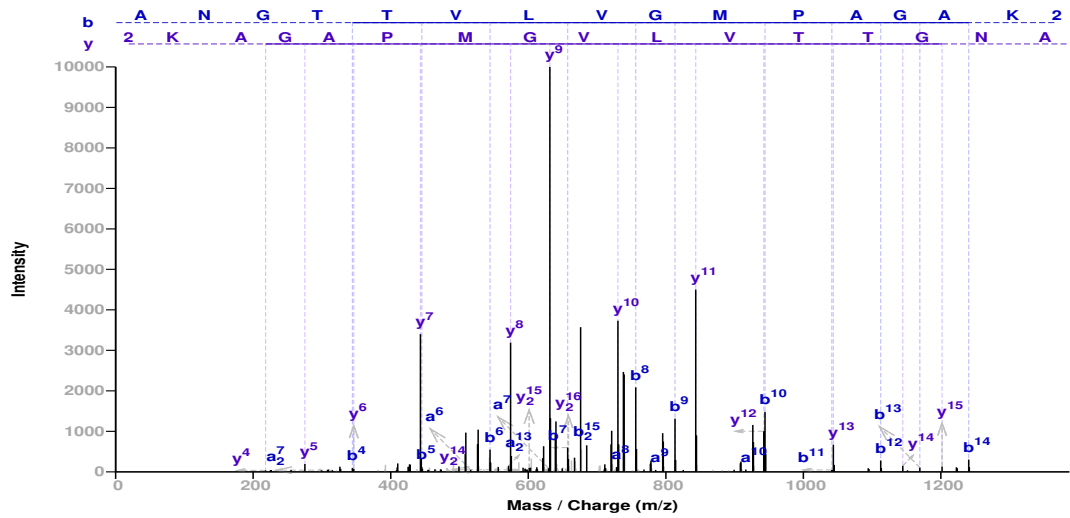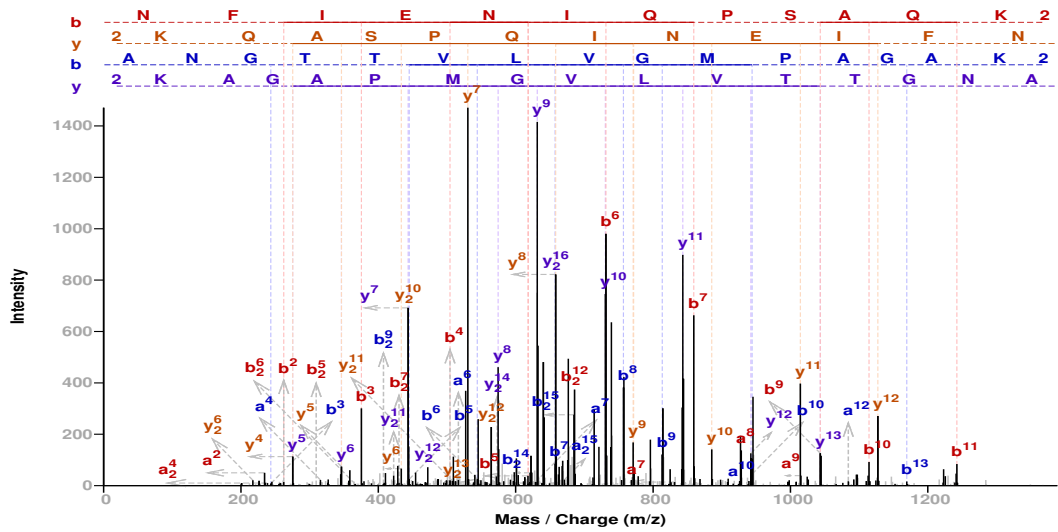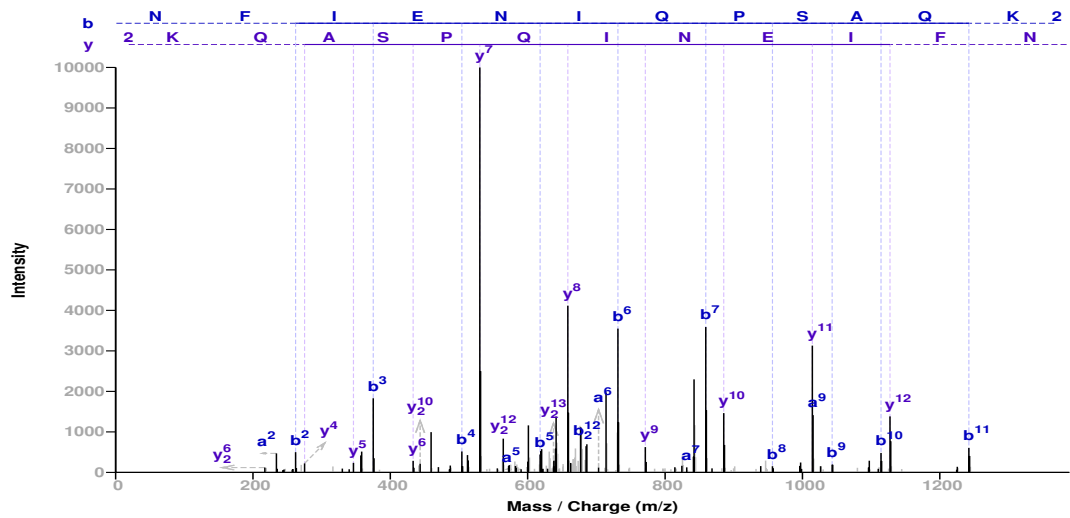





yeast01\_Scan\_Number\_3518 Precursor m/z: 717.355 cosine: 0.836  $\alpha$ : 0.948

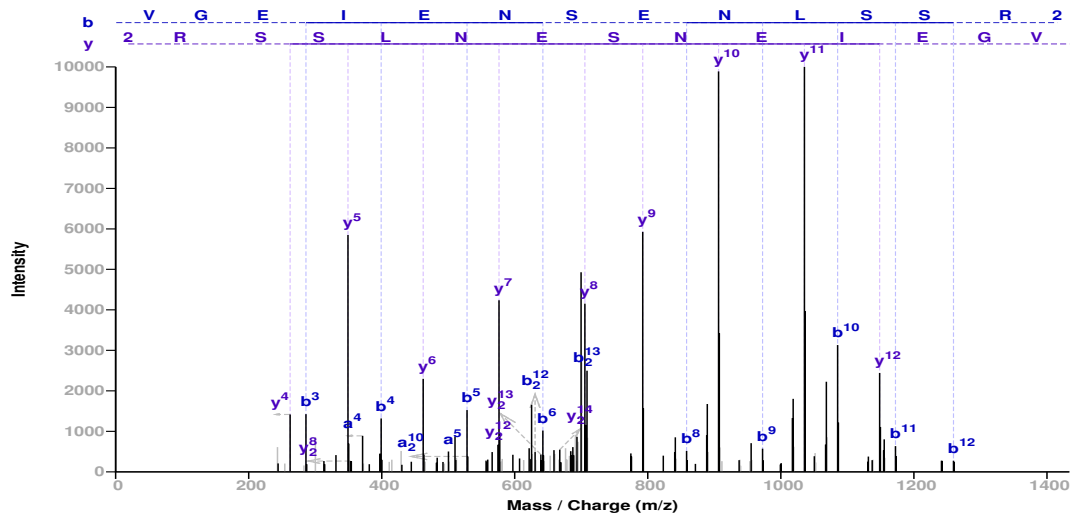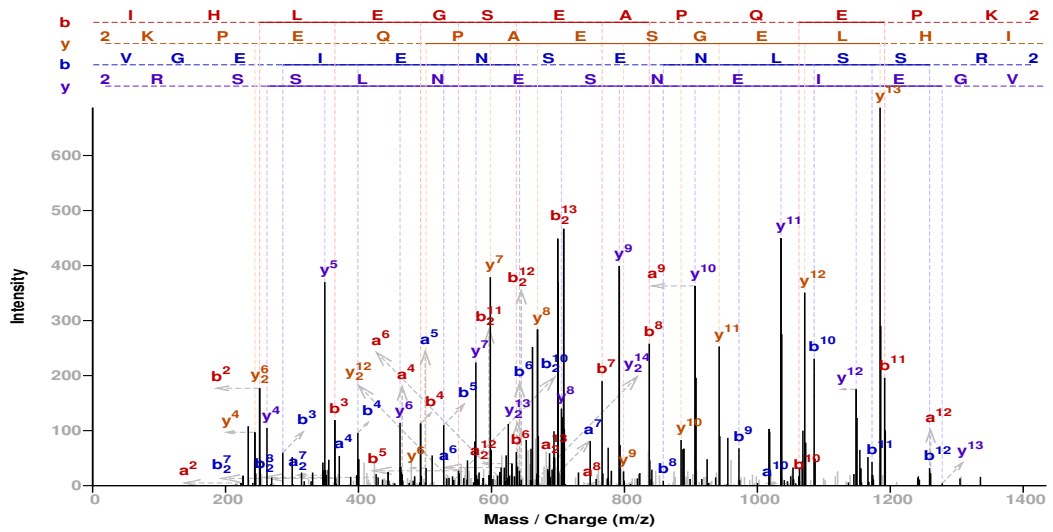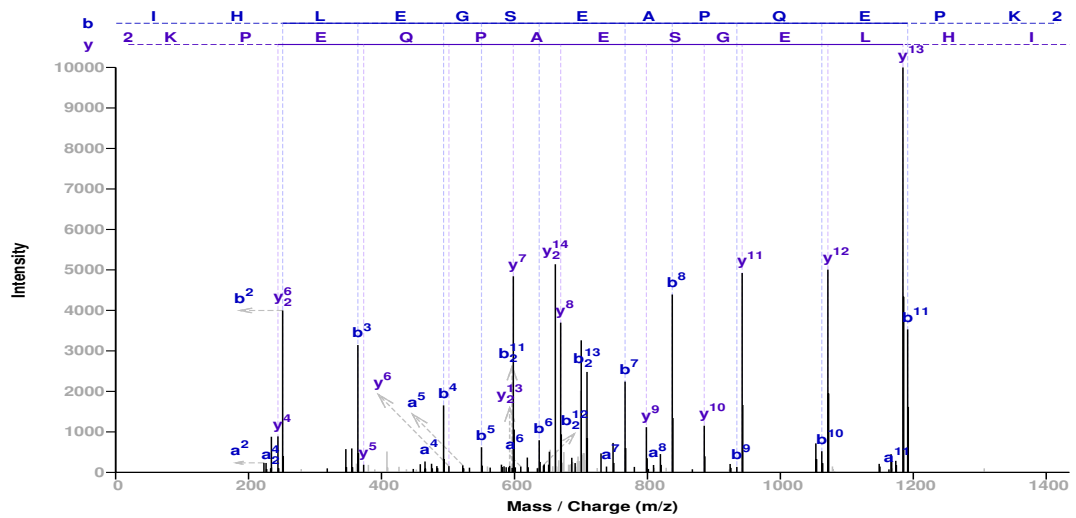

yeast01\_Scan\_Number\_3712 Precursor m/z: 520.623 cosine: 0.837  $\alpha$ : 0.944

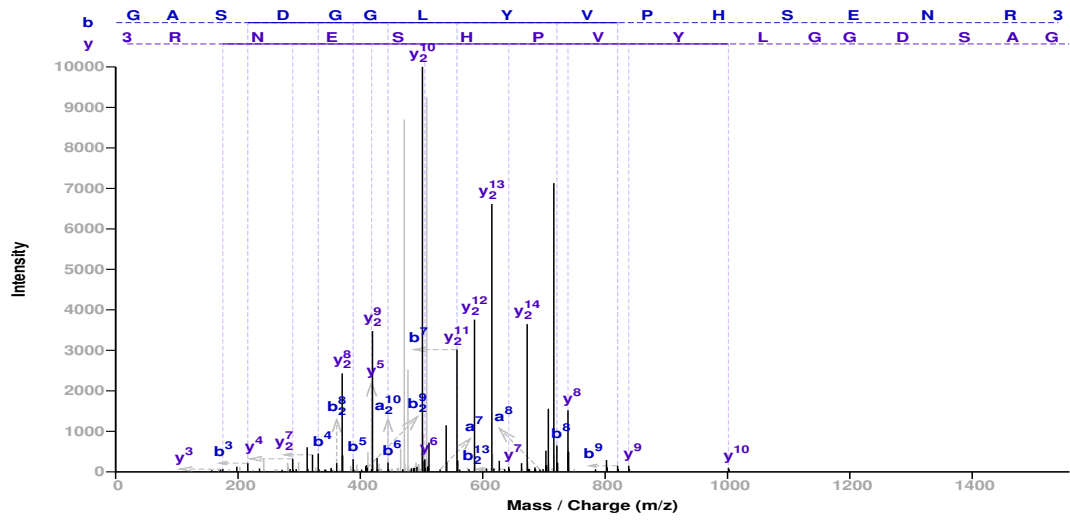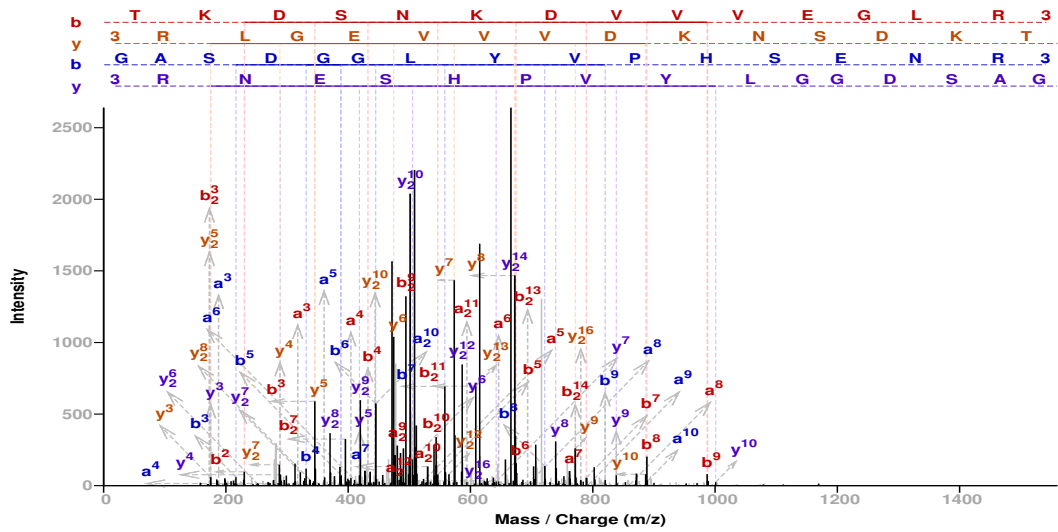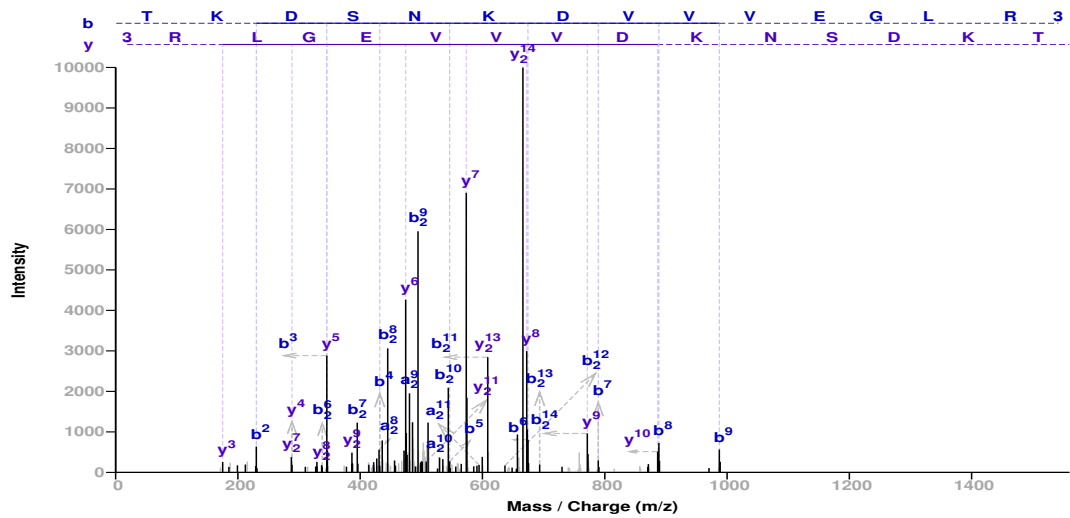

yeast01.Scan\_Number\_2995 Precursor m/z: 481.269 cosine: 0.753  $\alpha$ : 0.924

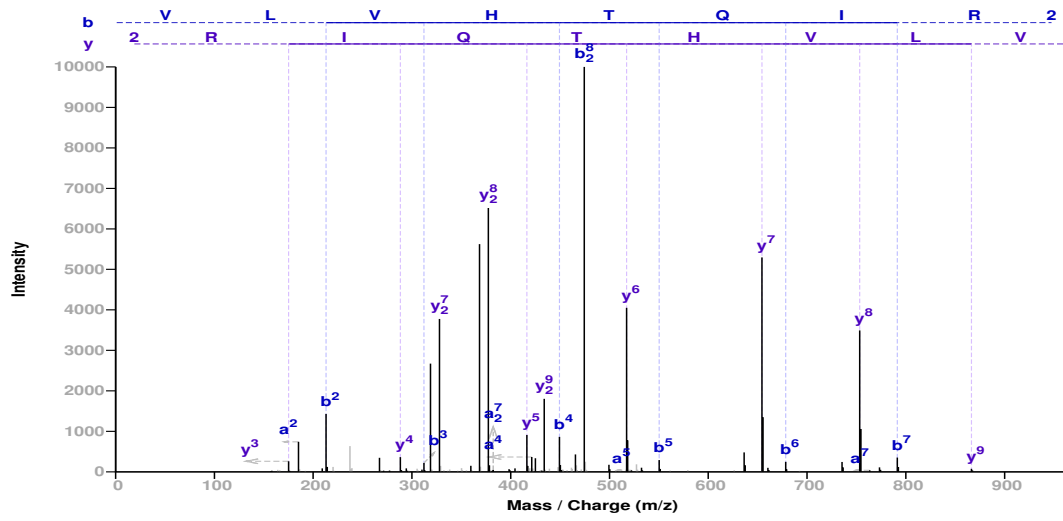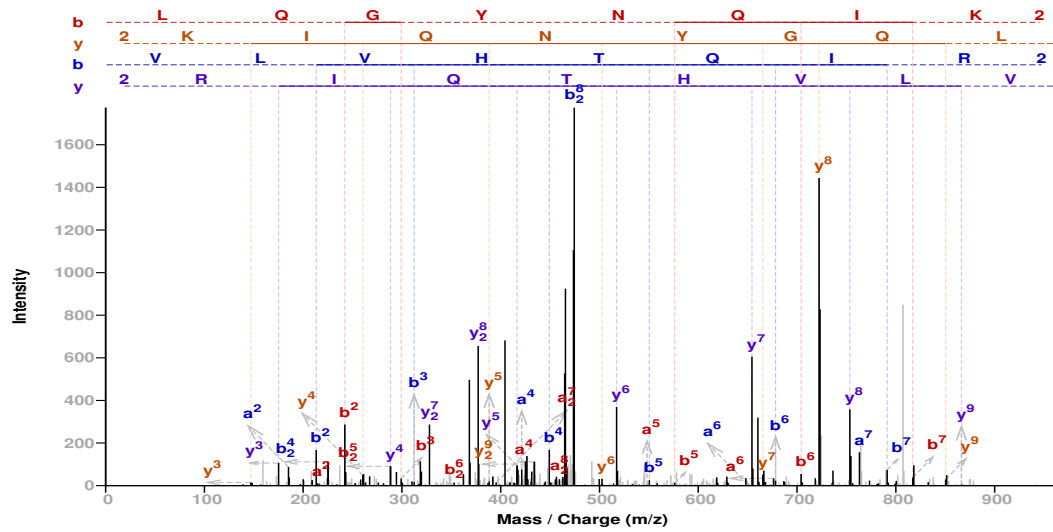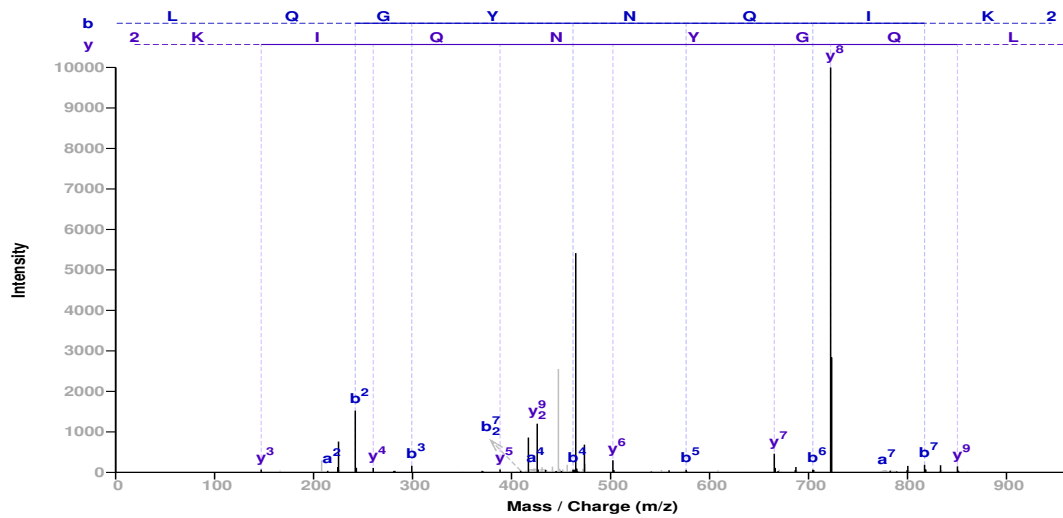





yeast01\_Scan\_Number\_1709 Precursor m/z: 501.788 cosine: 0.848  $\alpha$ : 0.911

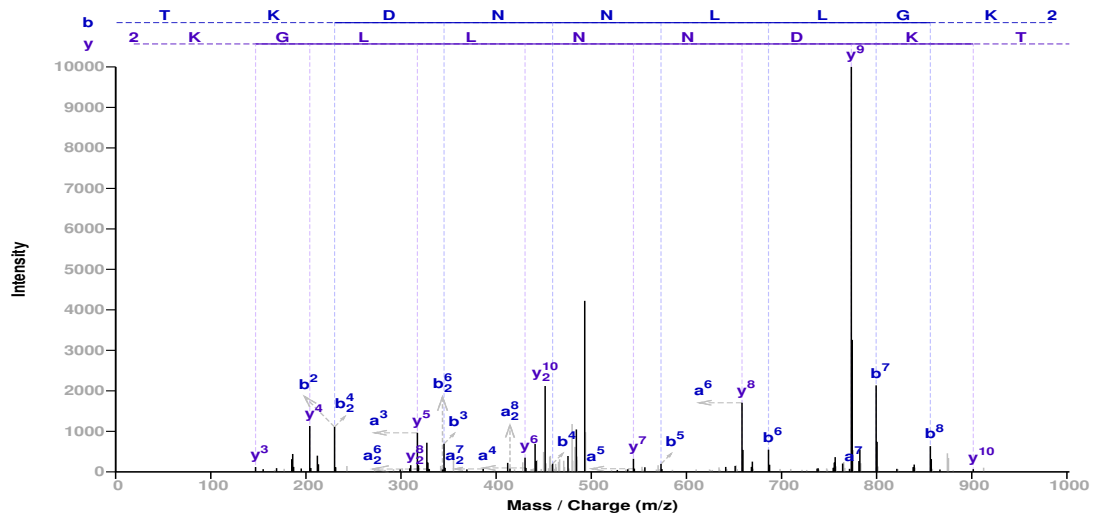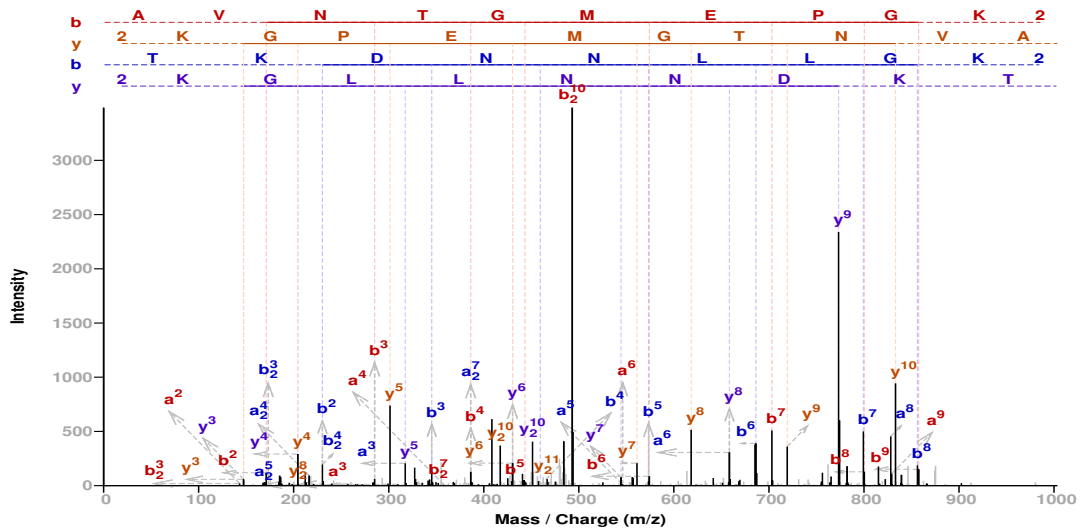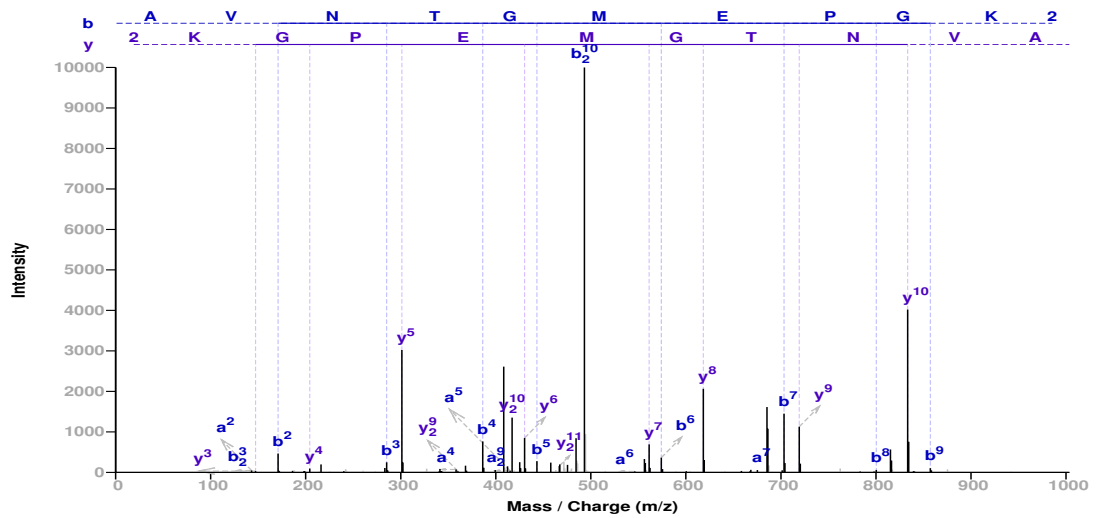

yeast01\_Scan\_Number\_4181 Precursor m/z: 531.761 cosine: 0.902  $\alpha$ : 0.909

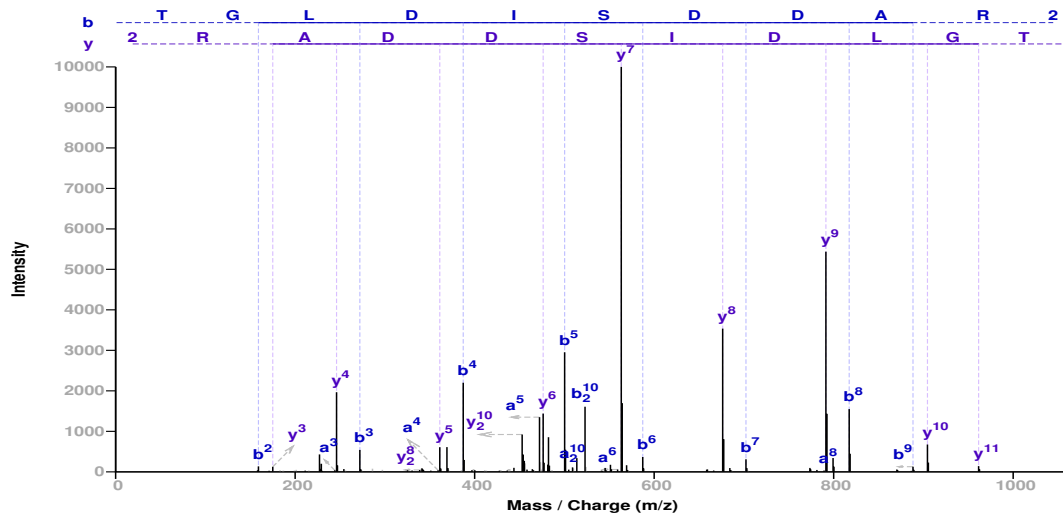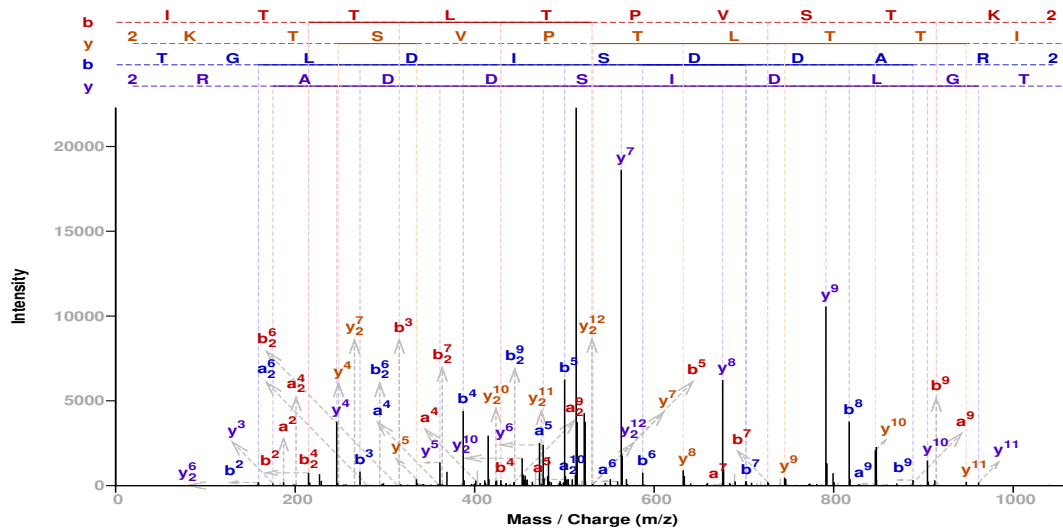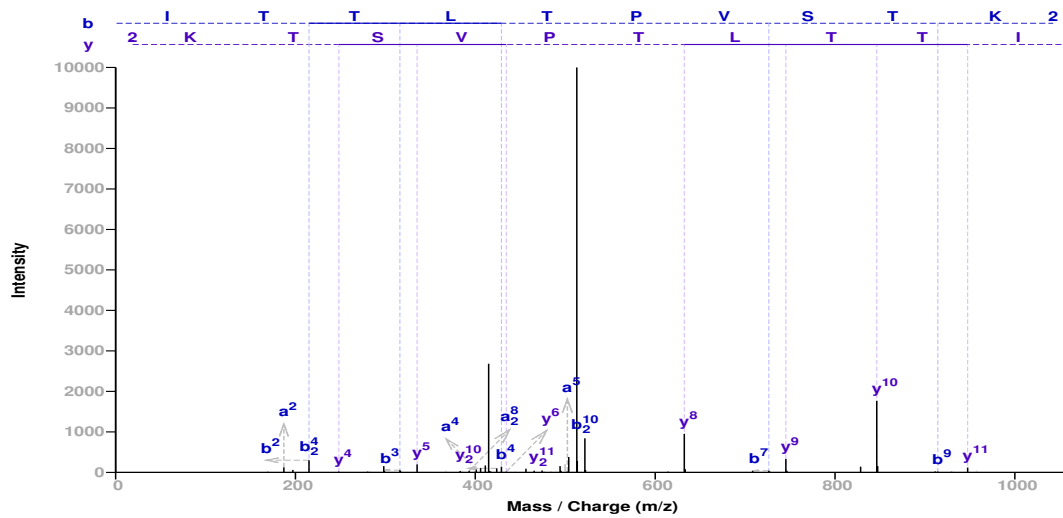



yeast01\_Scan\_Number\_3662 Precursor m/z: 388.704 cosine: 0.836  $\alpha$ : 0.890

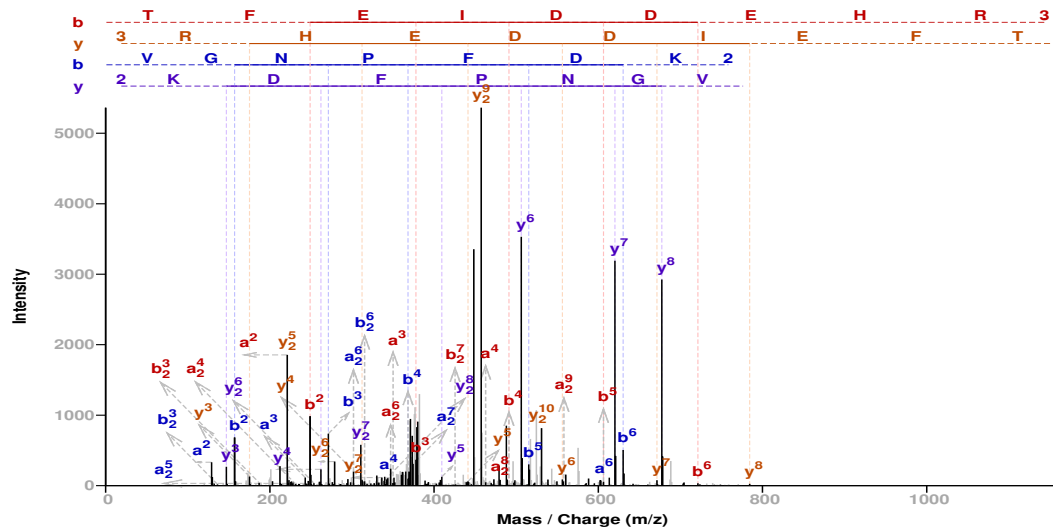

yeast01\_Scan\_Number\_3255 Precursor m/z: 503.911 cosine: 0.777  $\alpha$ : 0.888

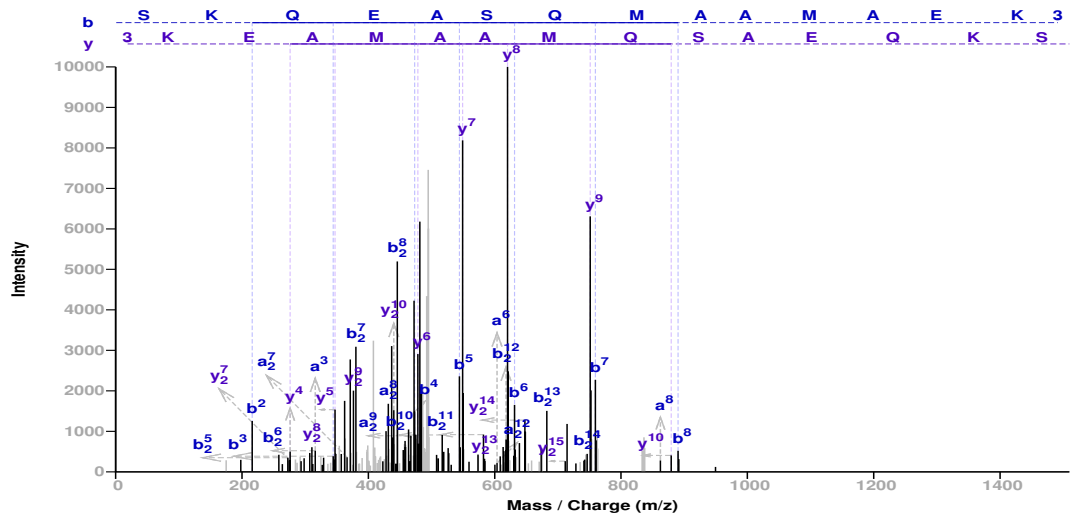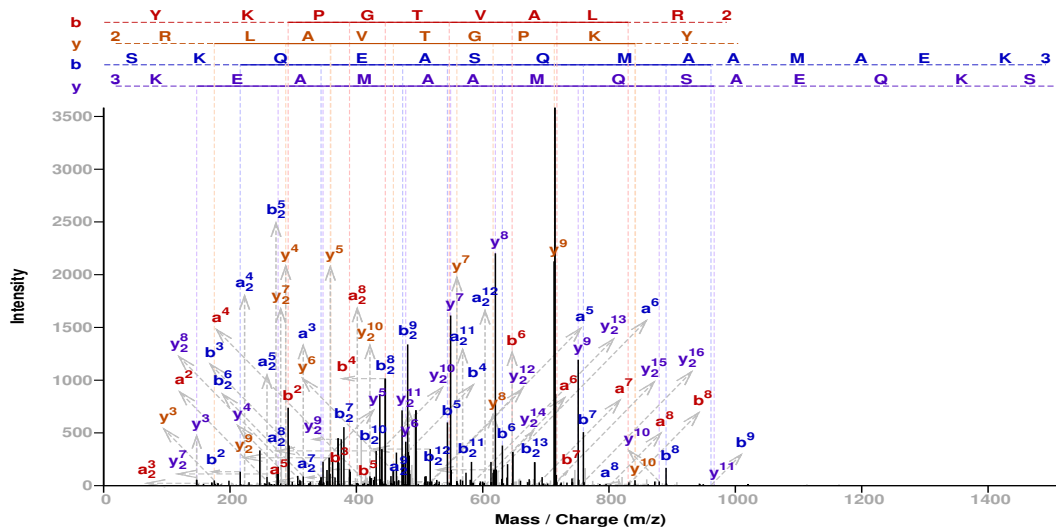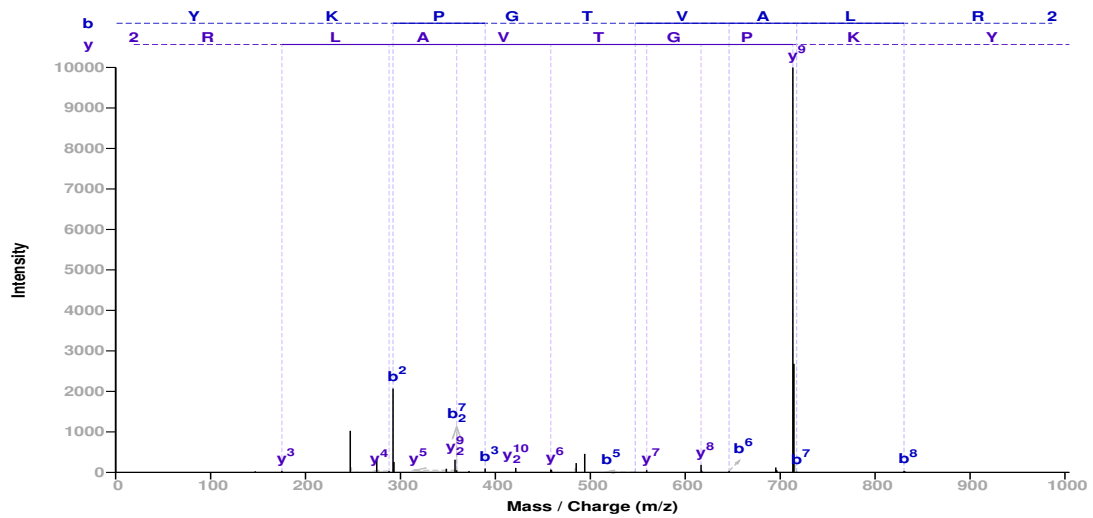

yeast01\_Scan\_Number\_5540 Precursor m/z: 736.898 cosine: 0.755  $\alpha$ : 0.886

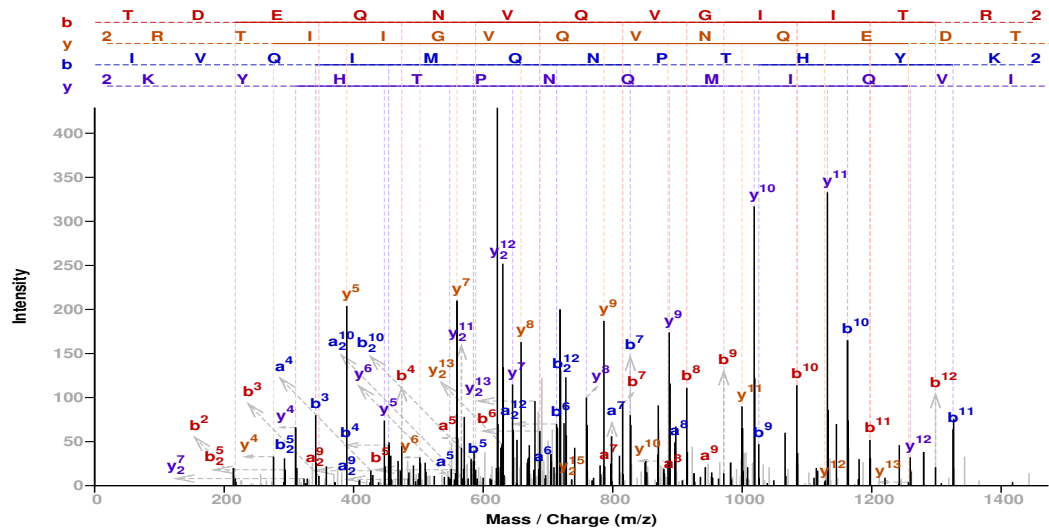

yeast01\_Scan\_Number\_3237 Precursor m/z: 355.736 cosine: 0.850  $\alpha$ : 0.877

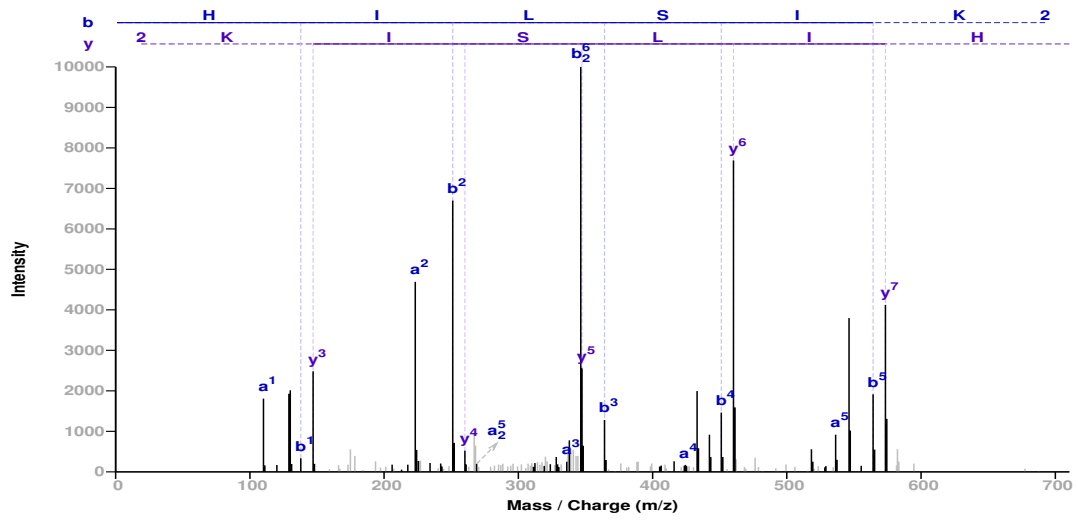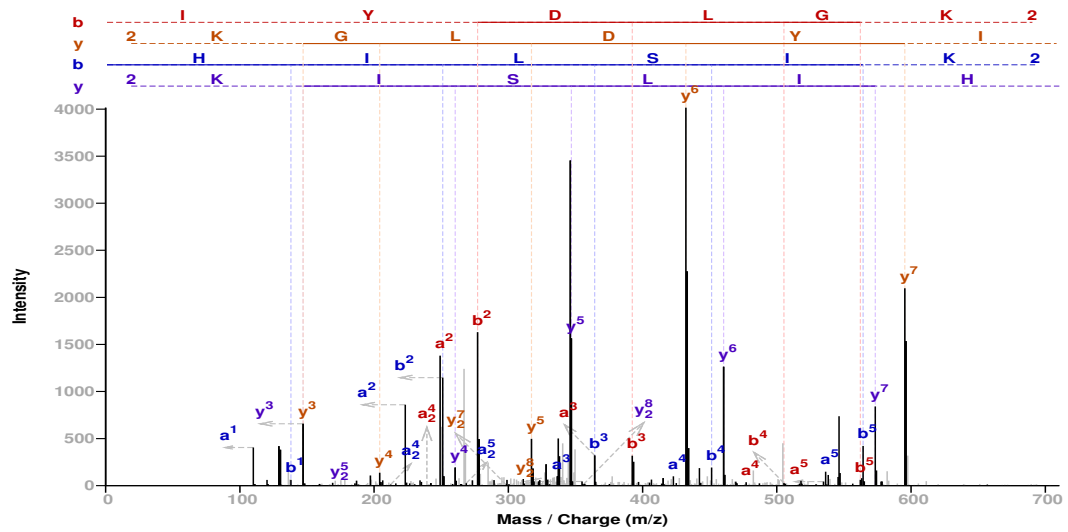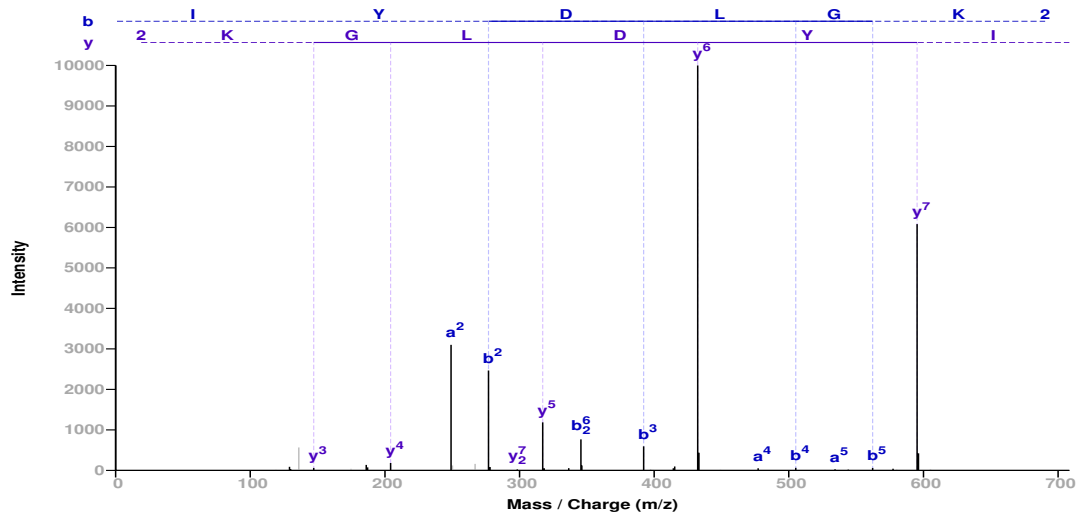



yeast01\_Scan\_Number\_5844 Precursor m/z: 611.317 cosine: 0.839  $\alpha$ : 0.867

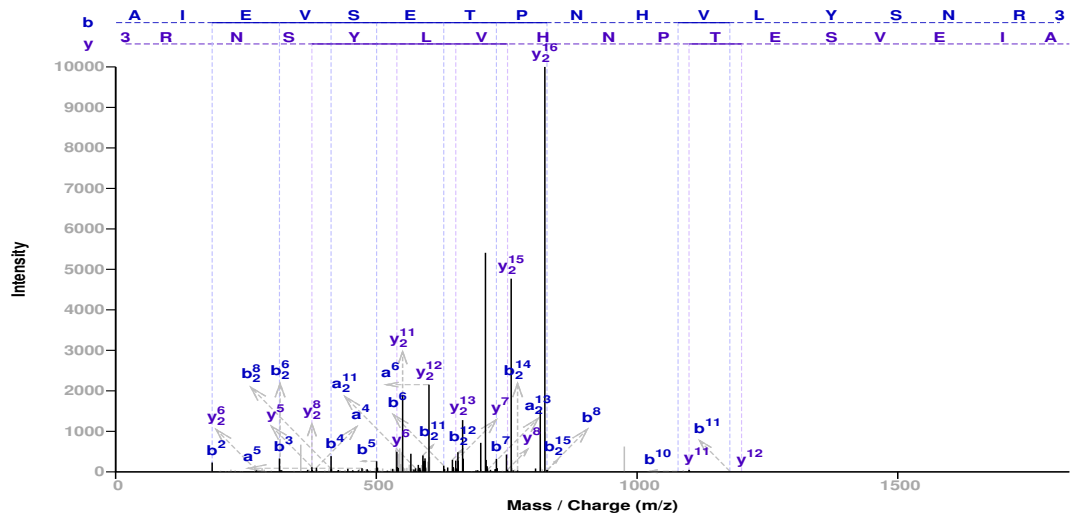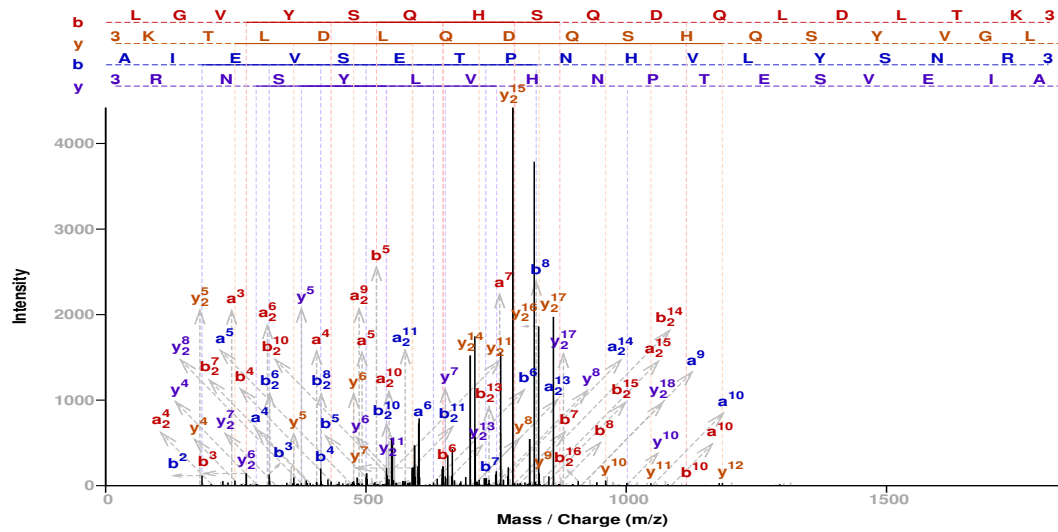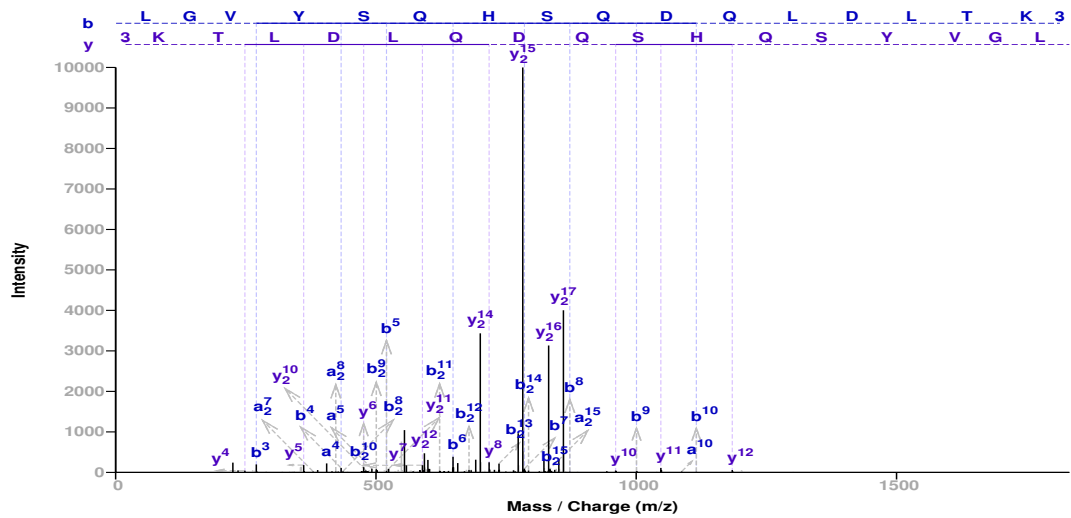

yeast01\_Scan\_Number\_2428 Precursor m/z: 561.841 cosine: 0.763  $\alpha$ : 0.850

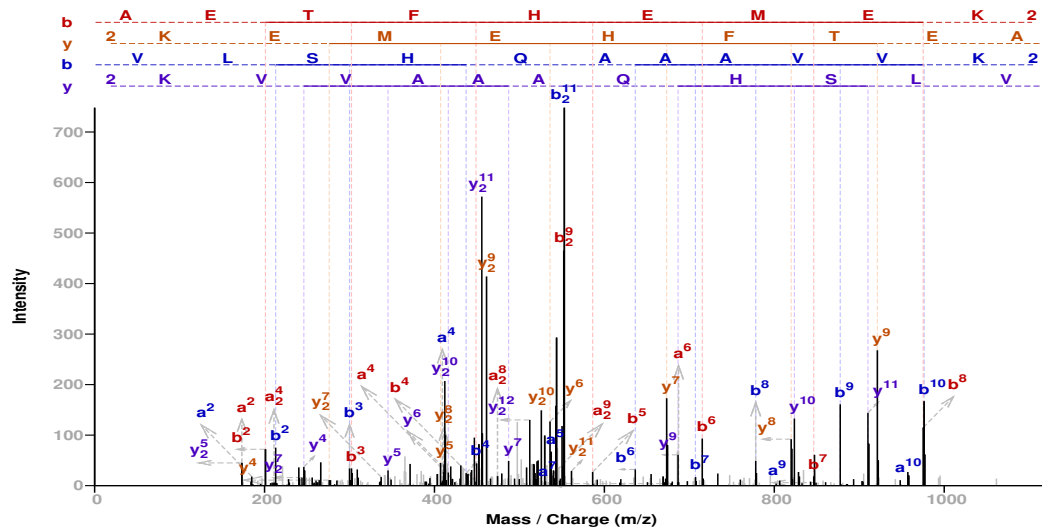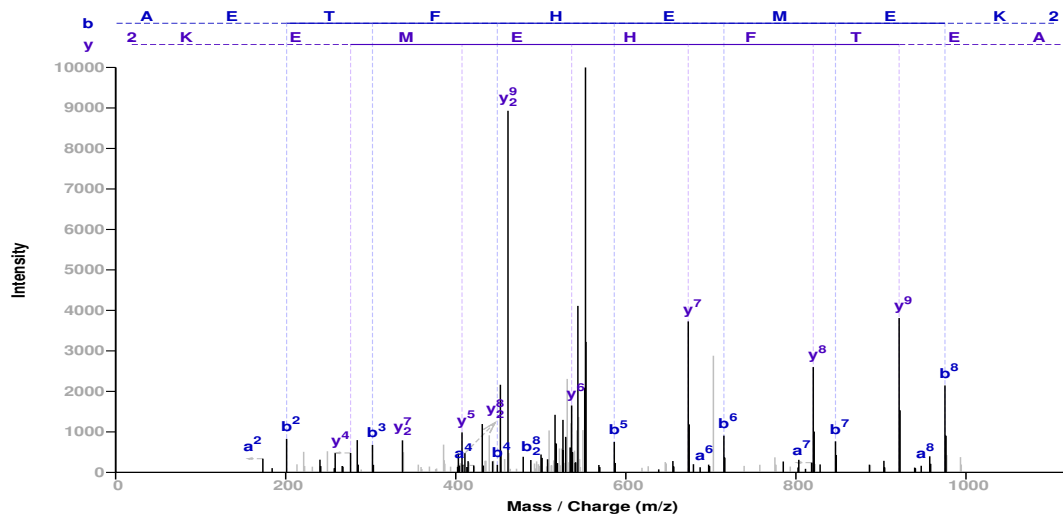

yeast01\_Scan\_Number\_2232 Precursor m/z: 467.744 cosine: 0.939  $\alpha$ : 0.831

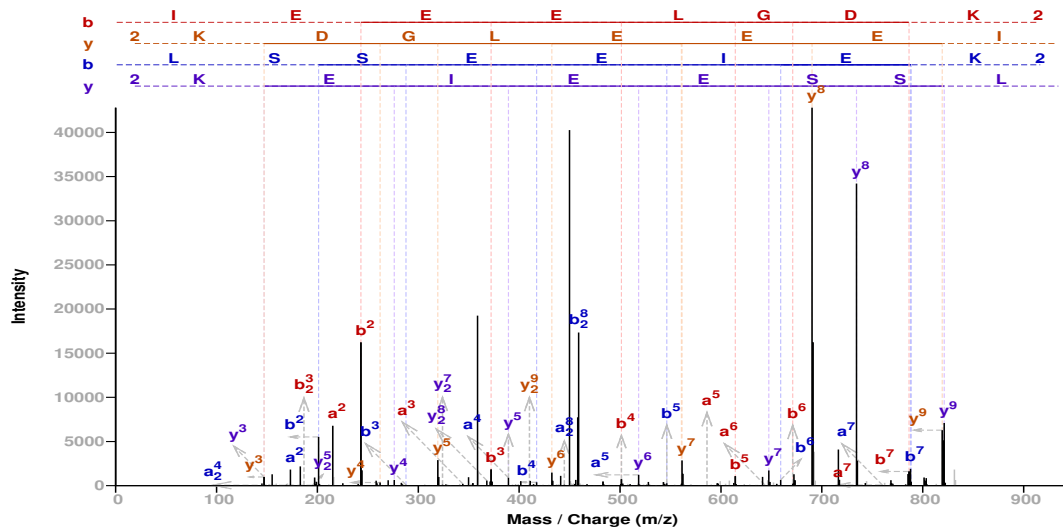



yeast01\_Scan\_Number\_6250 Precursor m/z: 385.217 cosine: 0.823  $\alpha$ : 0.825

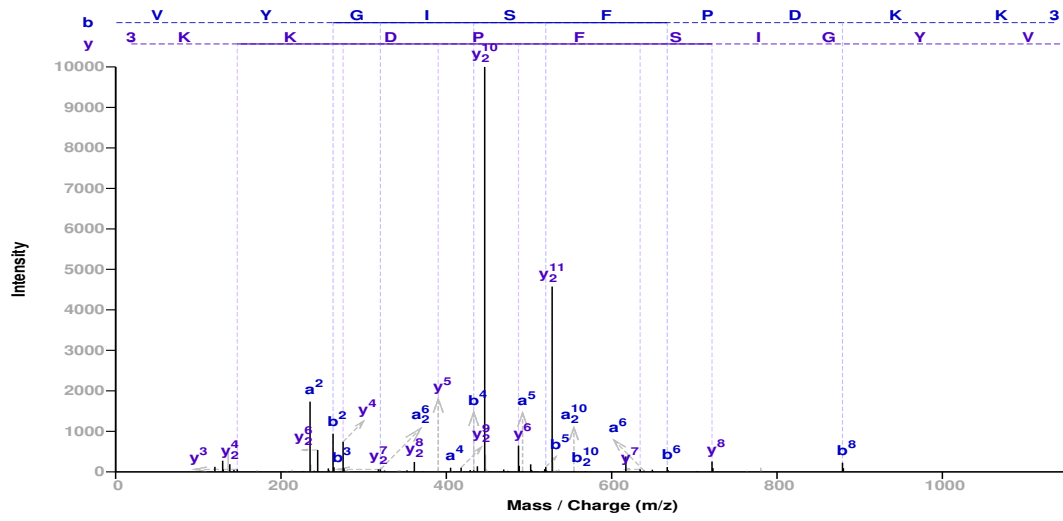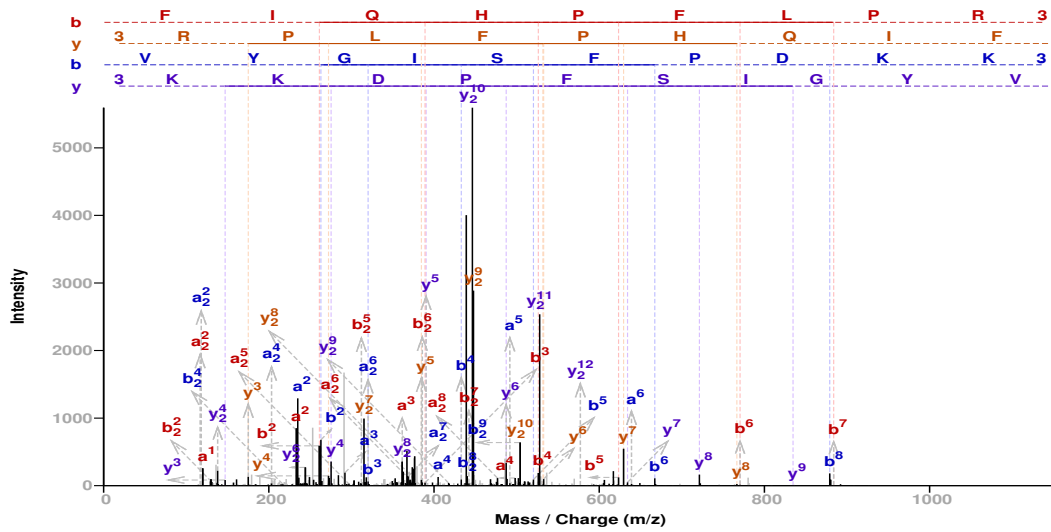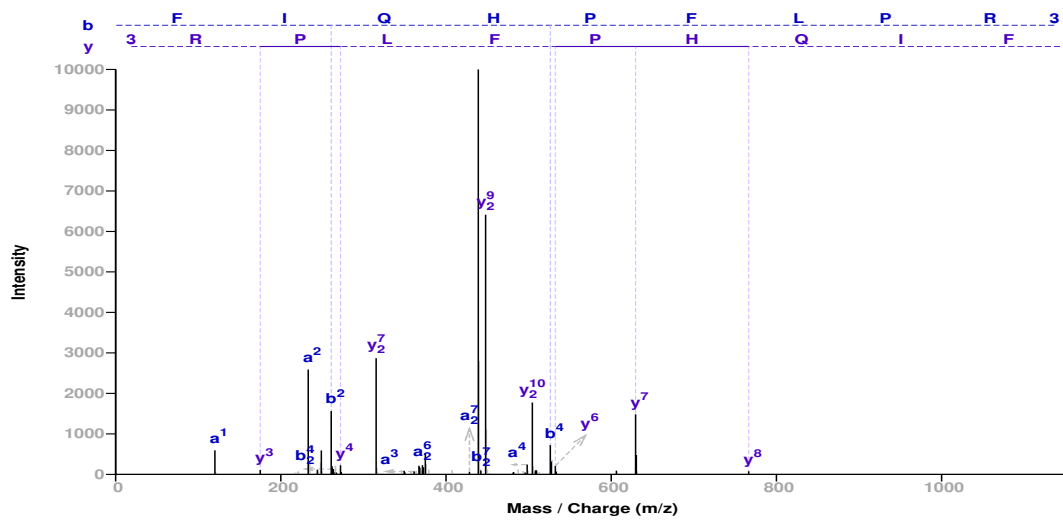

yeast01.Scan\_Number\_2698 Precursor m/z: 495.256 cosine: 0.832  $\alpha$ : 0.819

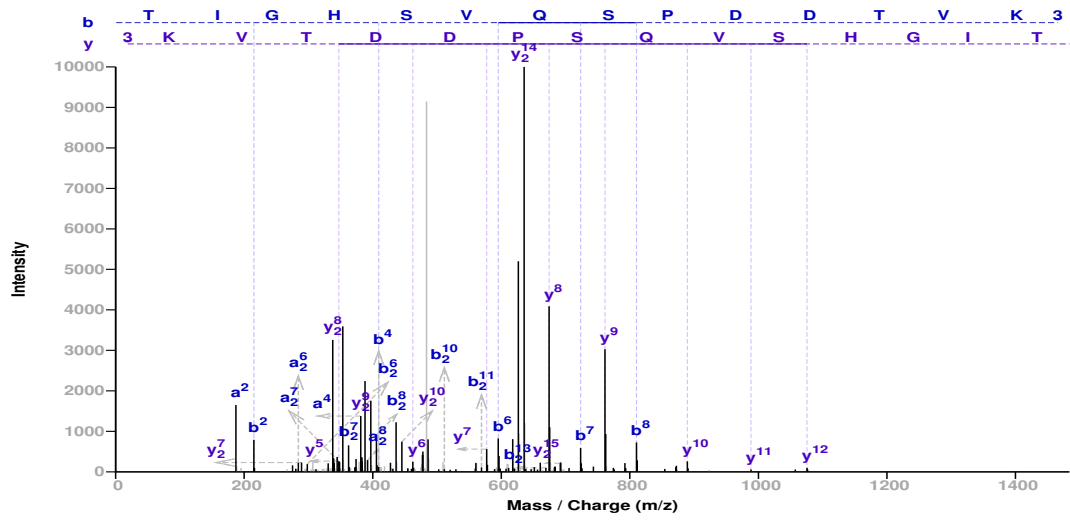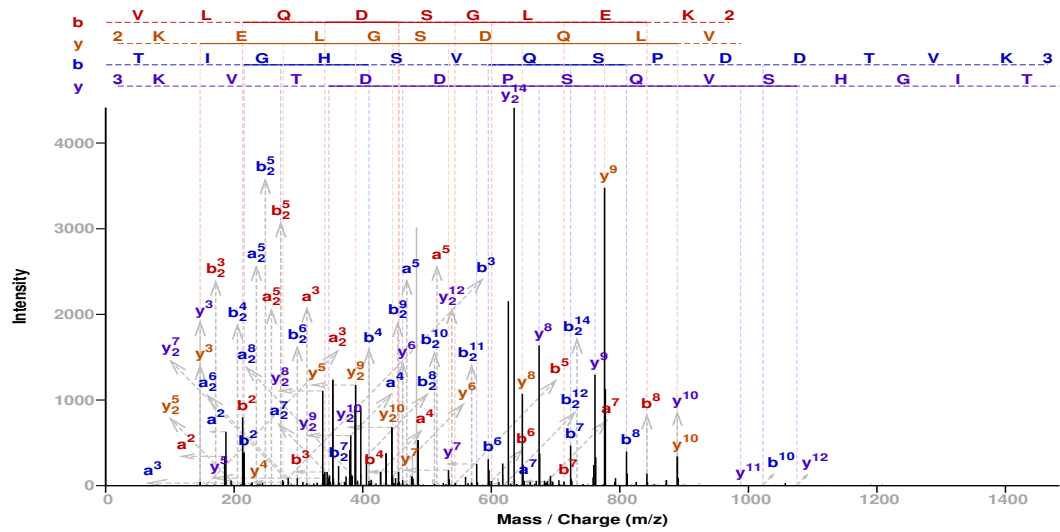

yeast01\_Scan\_Number\_3086 Precursor m/z: 305.925 cosine: 0.876  $\alpha$ : 0.814

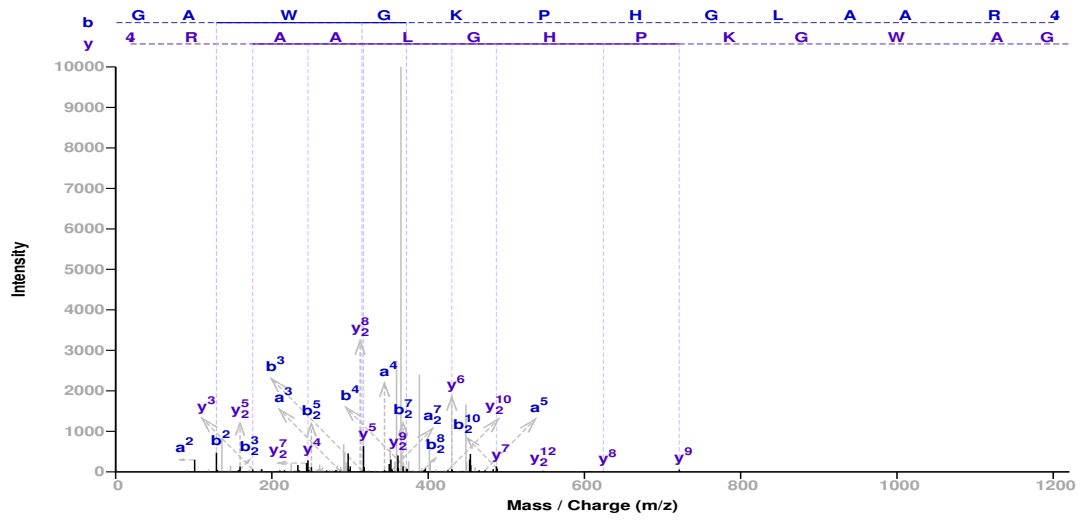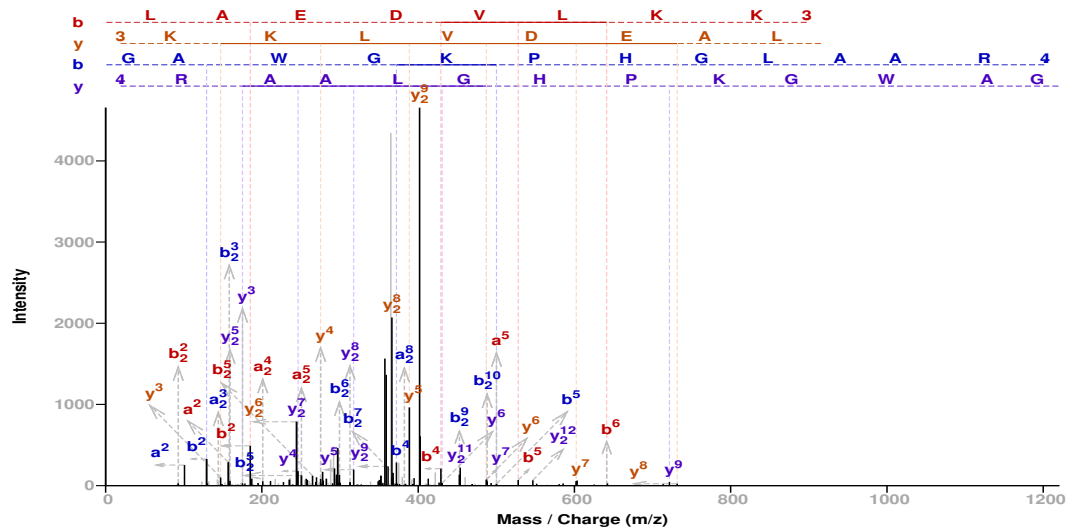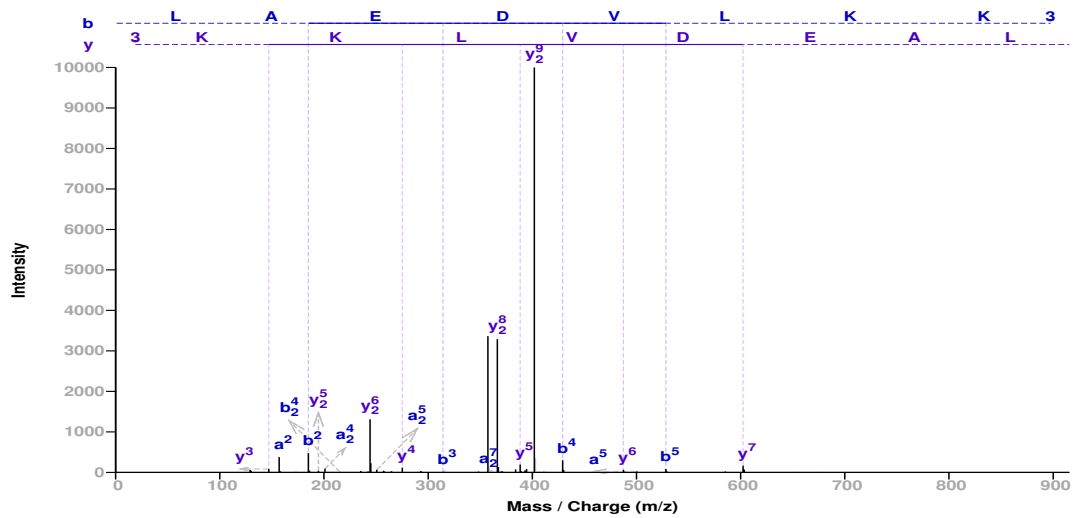

yeast01\_Scan\_Number\_3028 Precursor m/z: 563.772 cosine: 0.776  $\alpha$ : 0.813

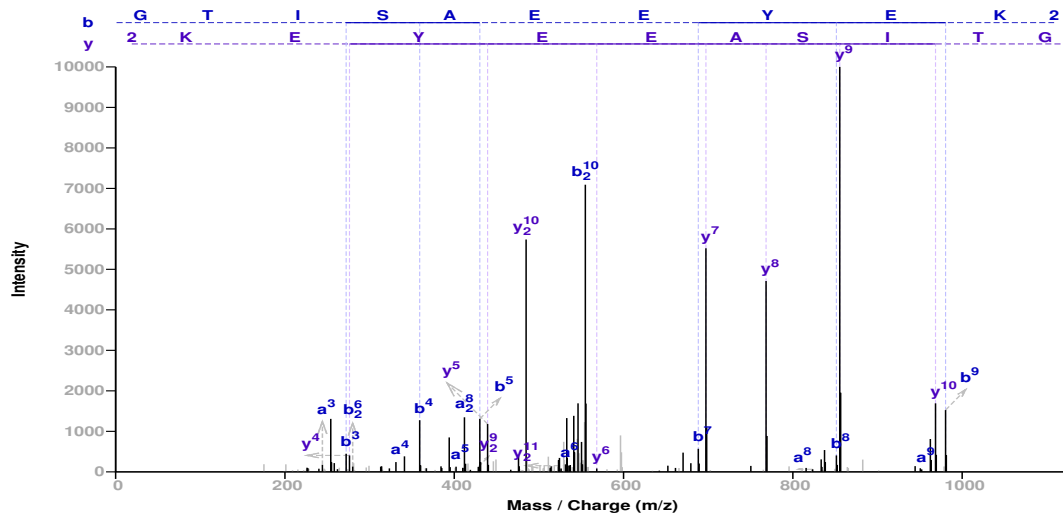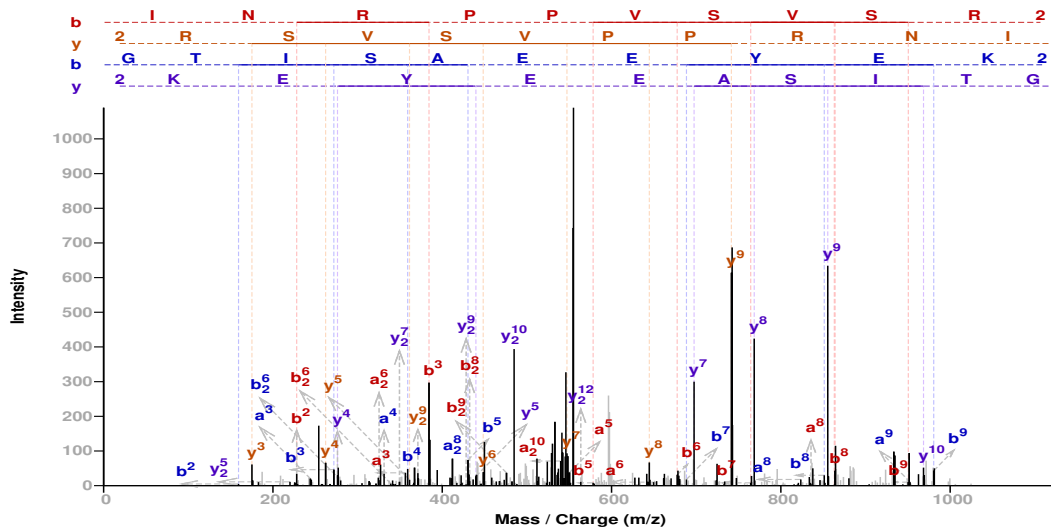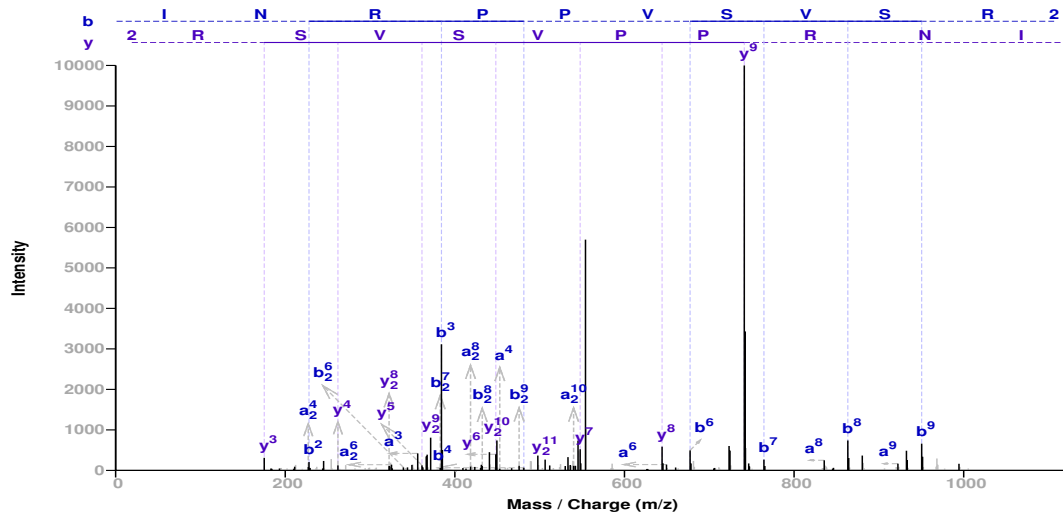

yeast01\_Scan\_Number\_6934 Precursor m/z: 530.762 cosine: 0.773  $\alpha$ : 0.812

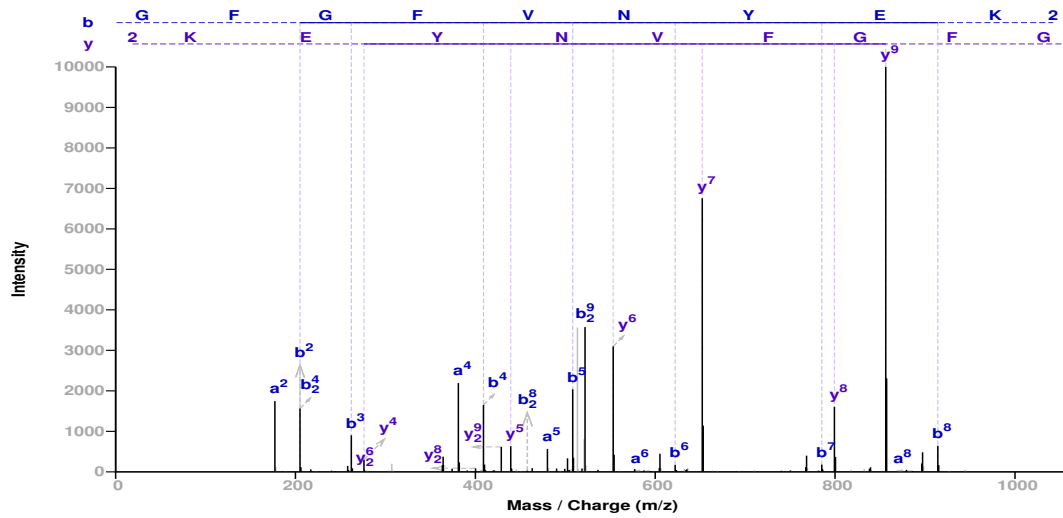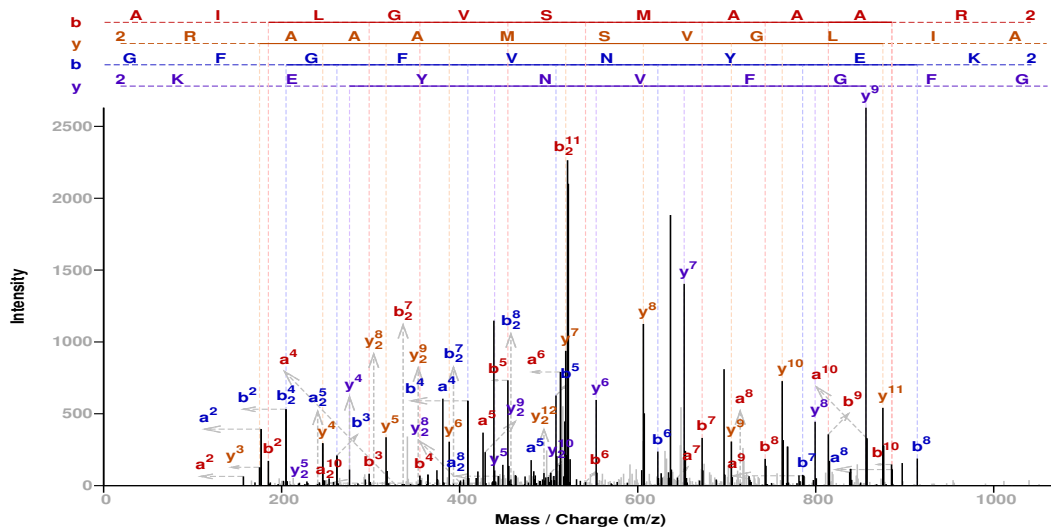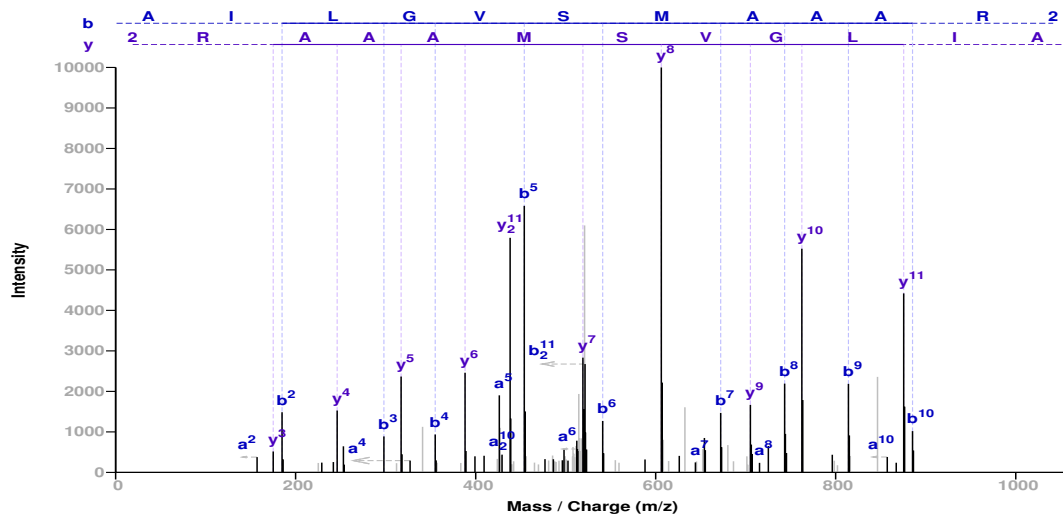

yeast01\_Scan\_Number\_6215 Precursor m/z: 582.311 cosine: 0.786  $\alpha$ : 0.811

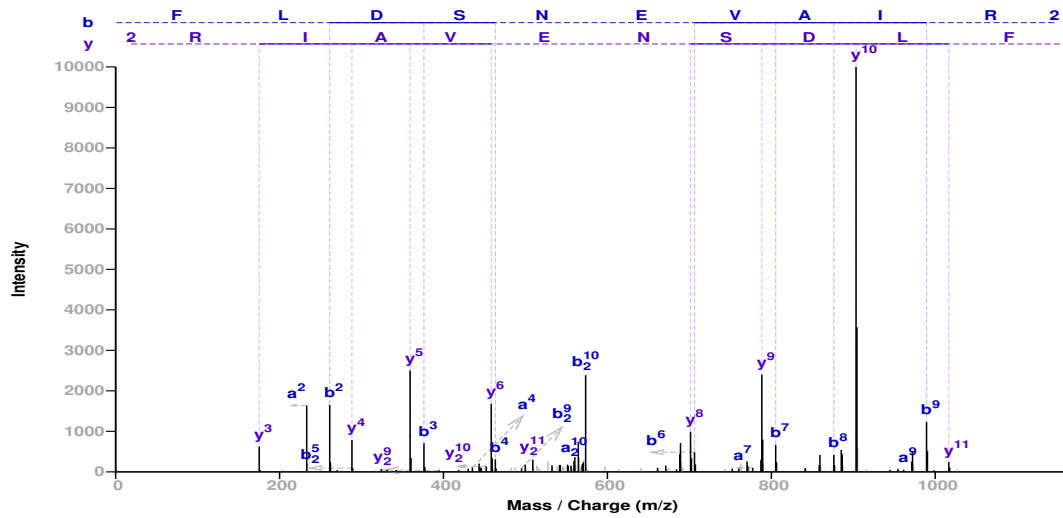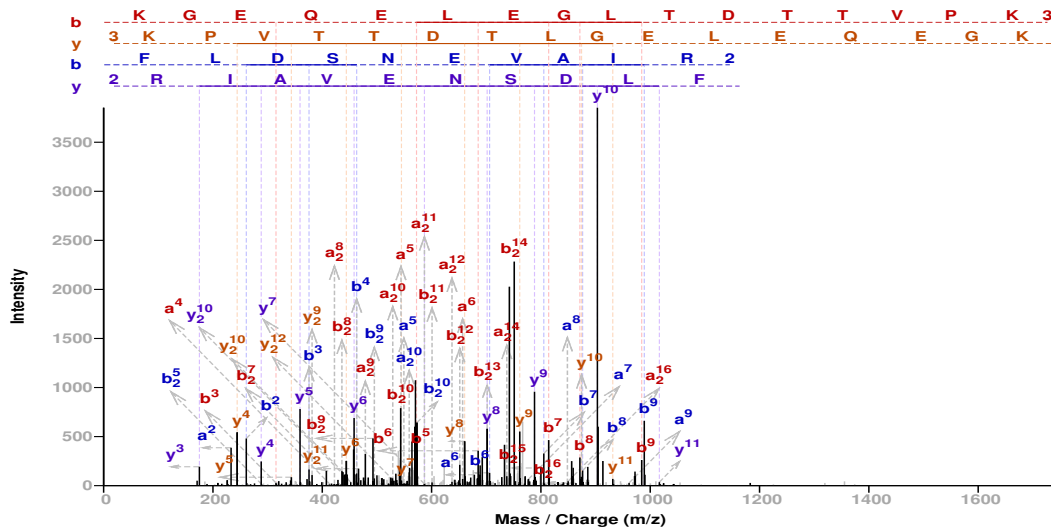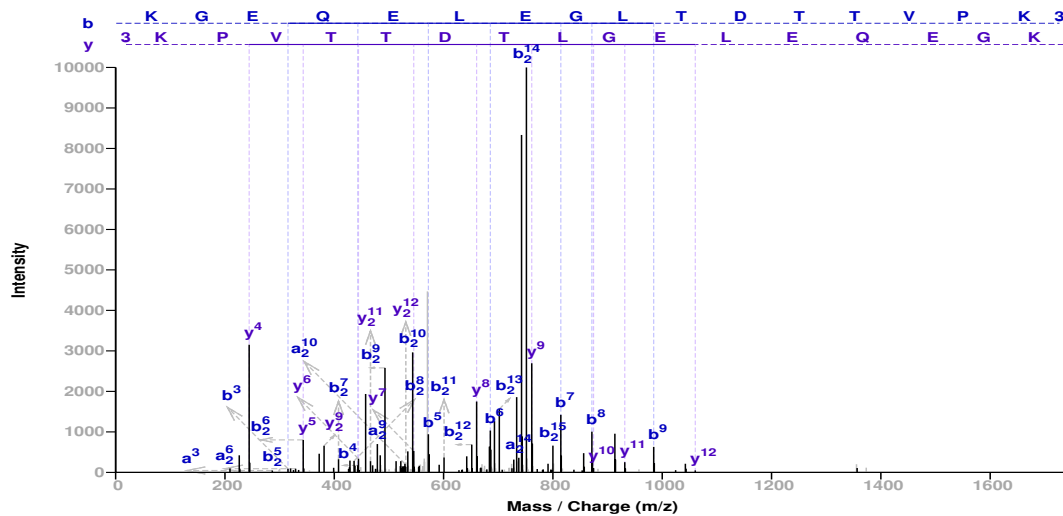

yeast01.Scan\_Number\_2472 Precursor m/z: 479.247 cosine: 0.761  $\alpha$ : 0.796

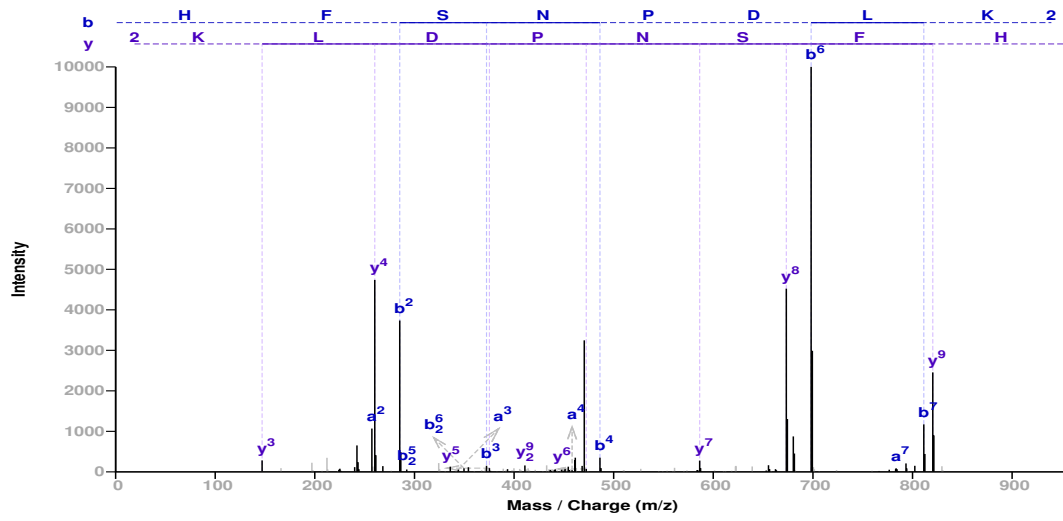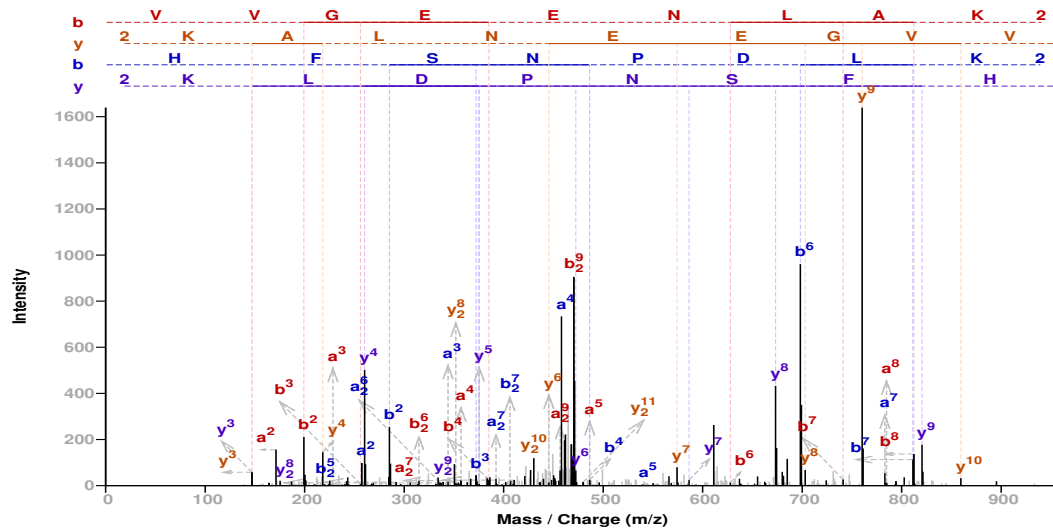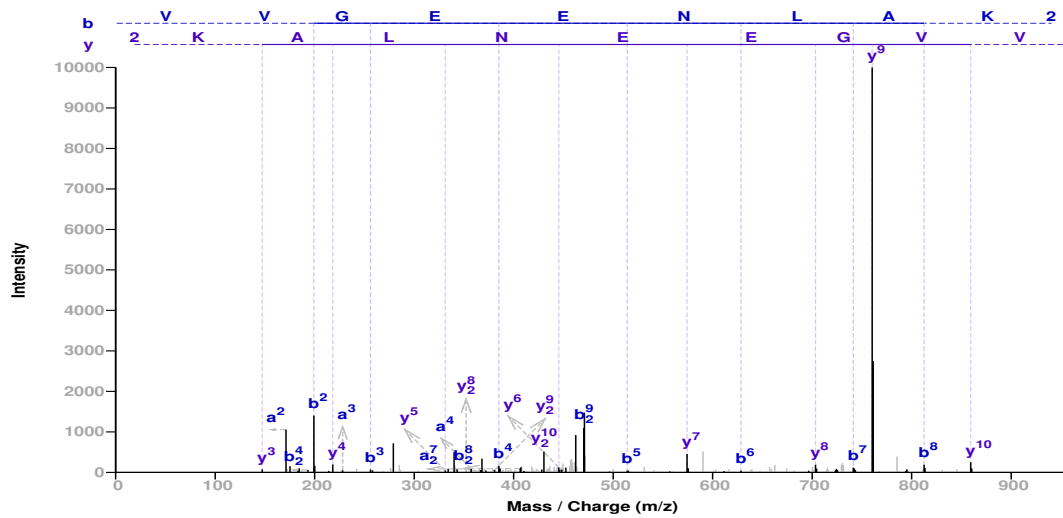

yeast01\_Scan\_Number\_1711 Precursor m/z: 344.197 cosine: 0.856  $\alpha$ : 0.792

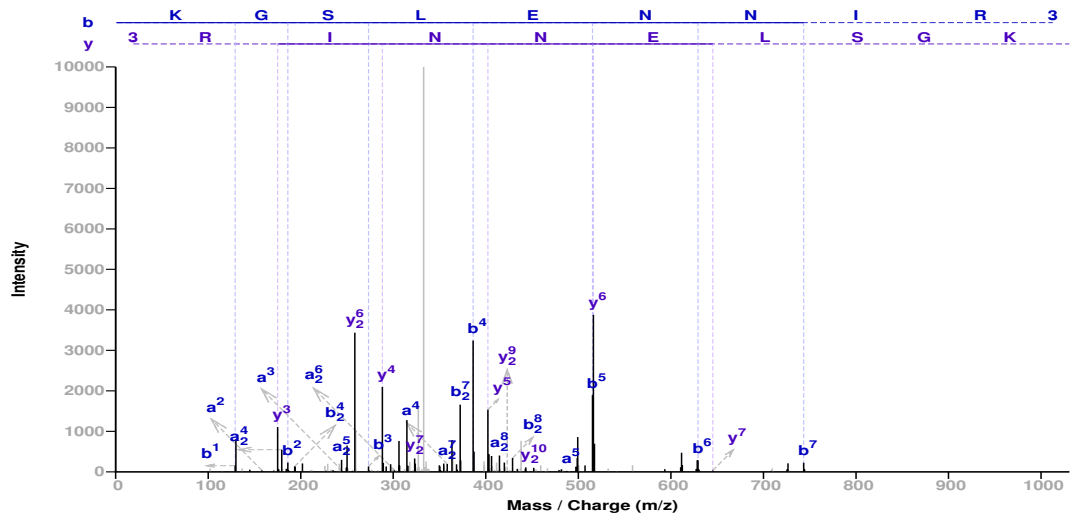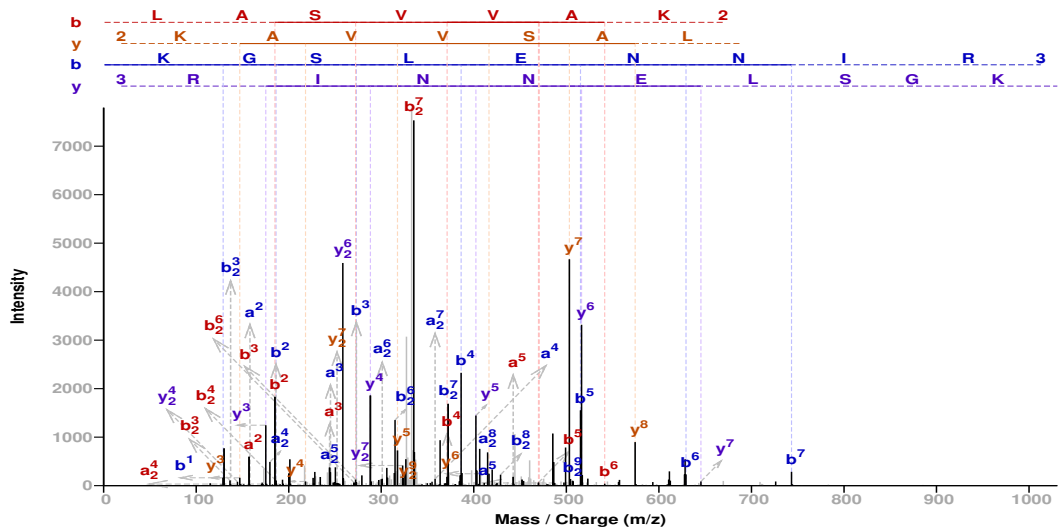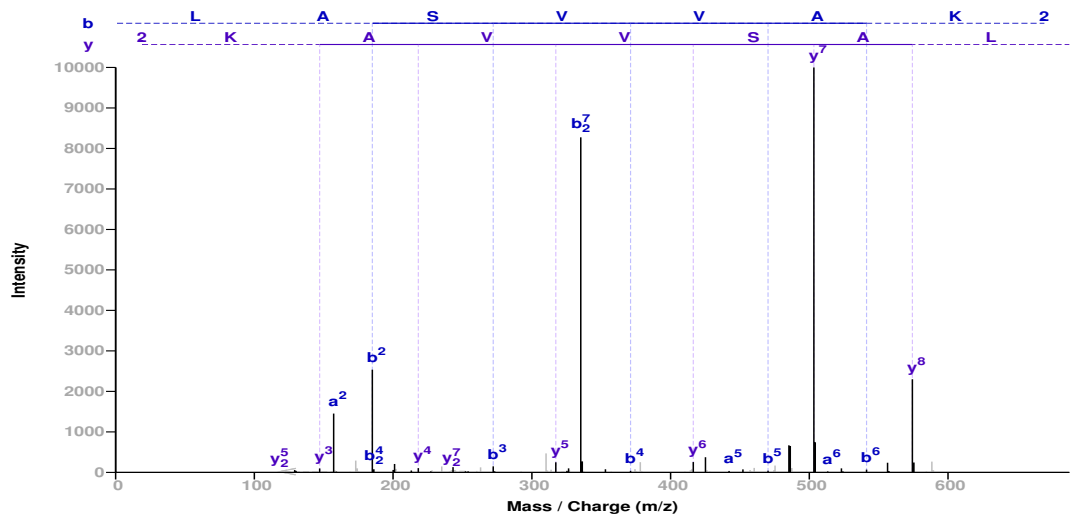



yeast01\_Scan\_Number\_3155 Precursor m/z: 613.340 cosine: 0.819  $\alpha$ : 0.785

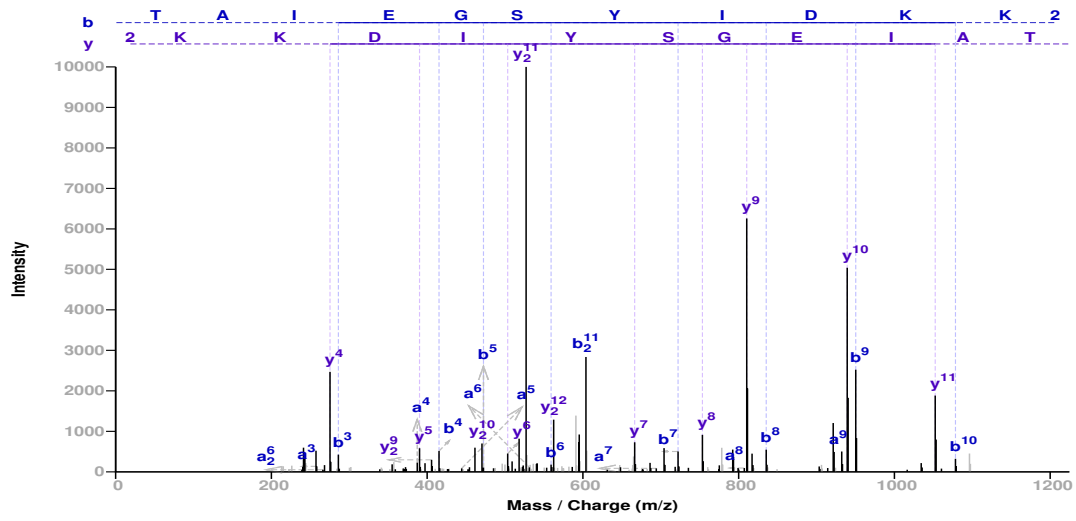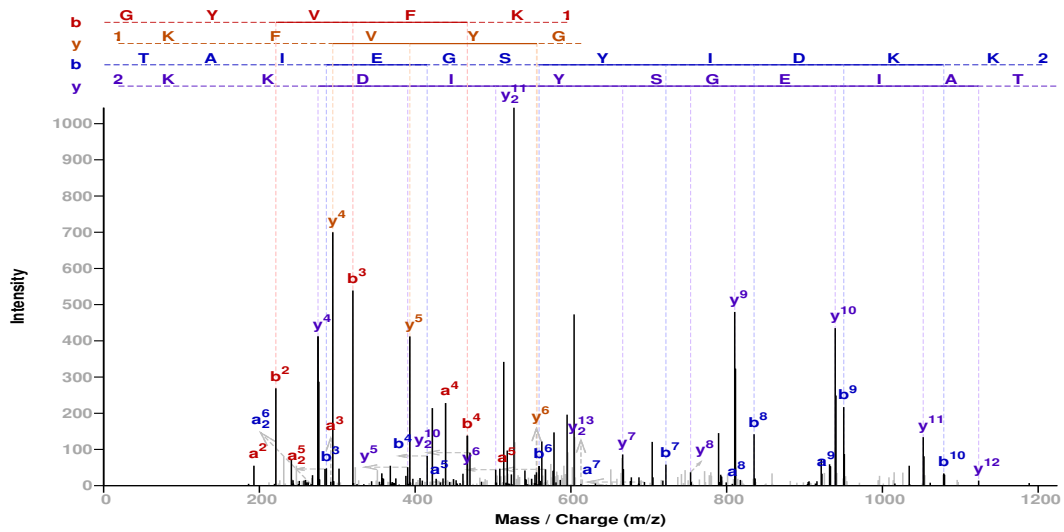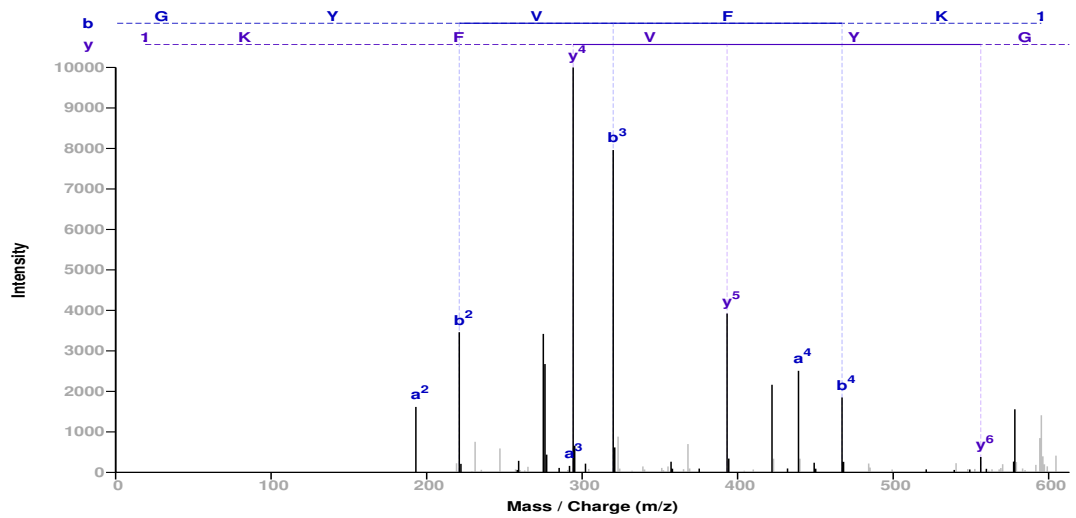

yeast01\_Scan\_Number\_599 Precursor m/z: 427.743 cosine: 0.736  $\alpha$ : 0.776

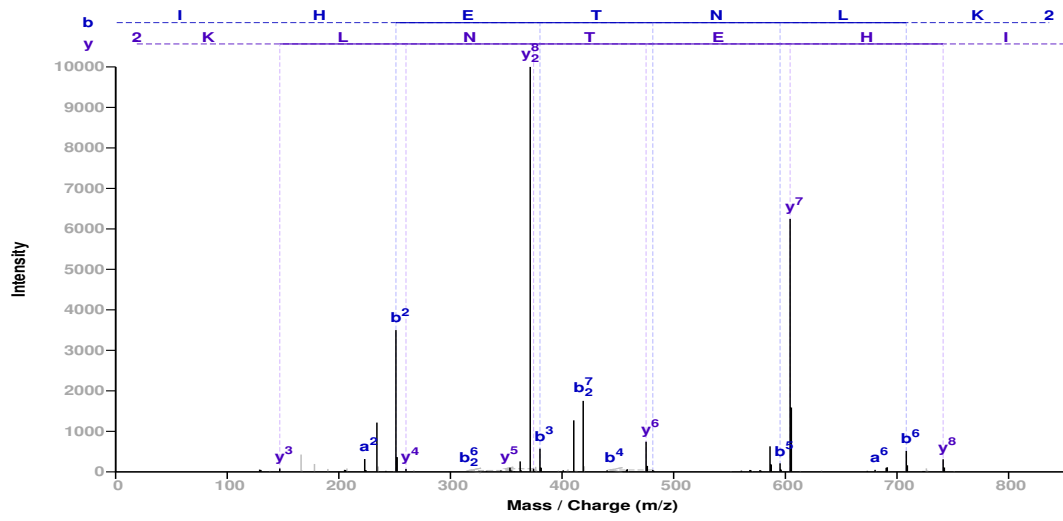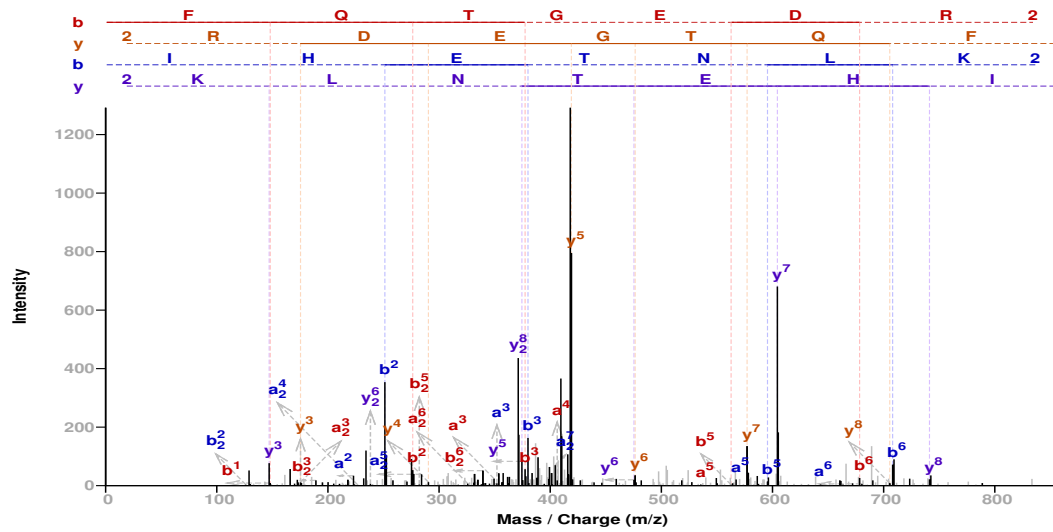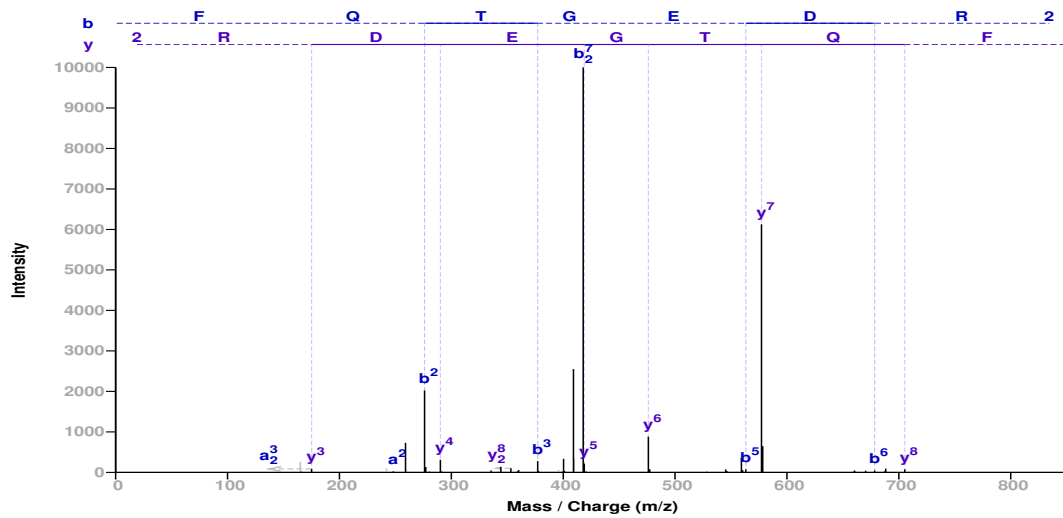

yeast01\_Scan\_Number\_717 Precursor m/z: 430.253 cosine: 0.783  $\alpha$ : 0.774

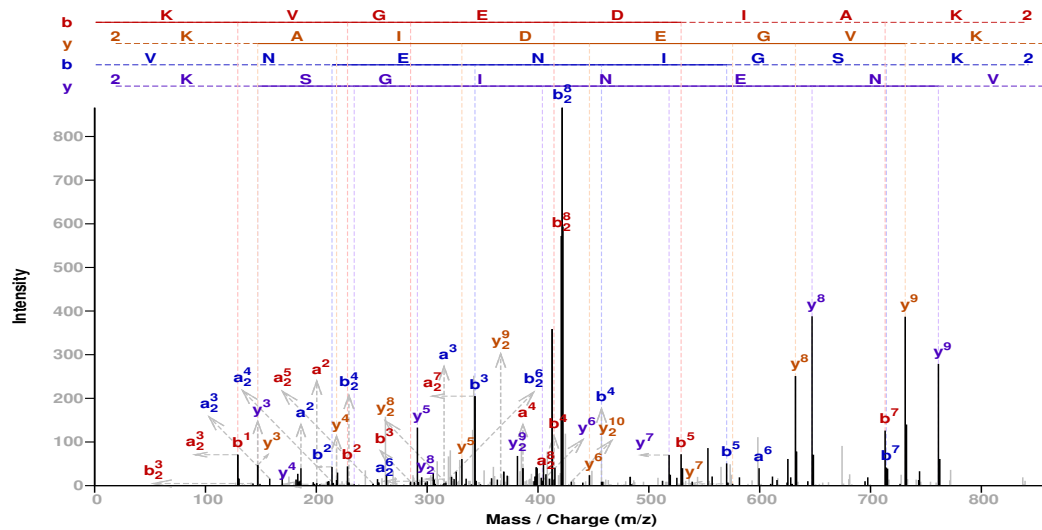

yeast01\_Scan\_Number\_3063 Precursor m/z: 562.831 cosine: 0.785  $\alpha$ : 0.768

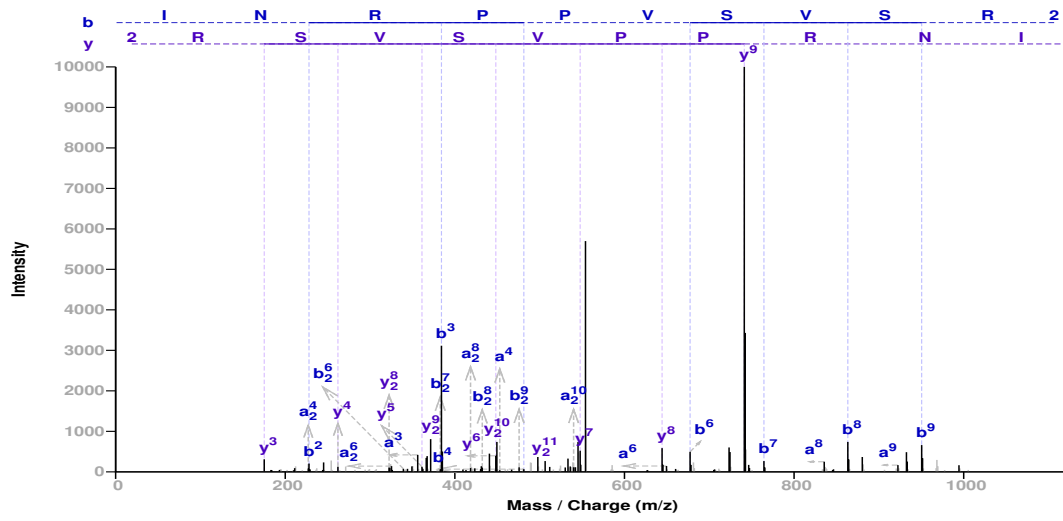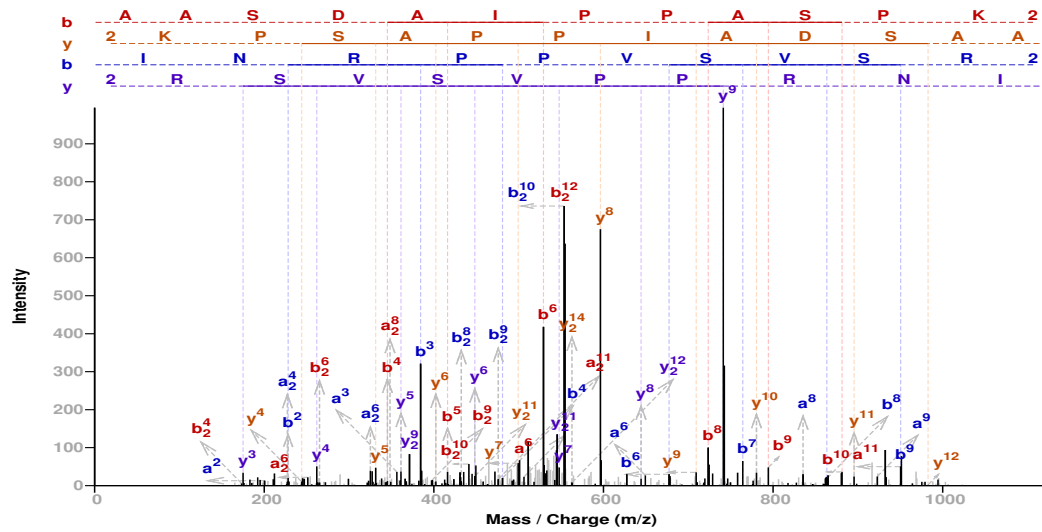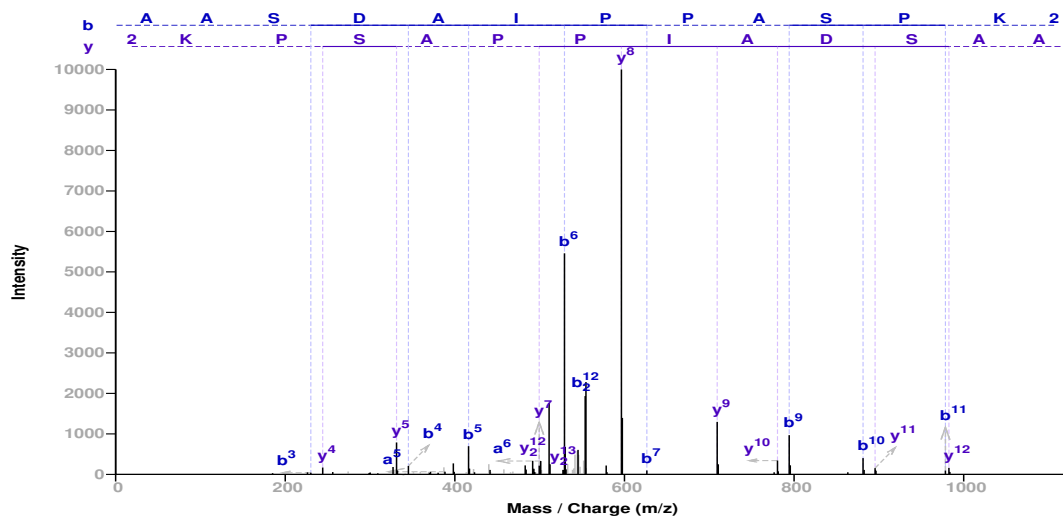

yeast01\_Scan\_Number\_9547 Precursor m/z: 605.802 cosine: 0.728  $\alpha$ : 0.764

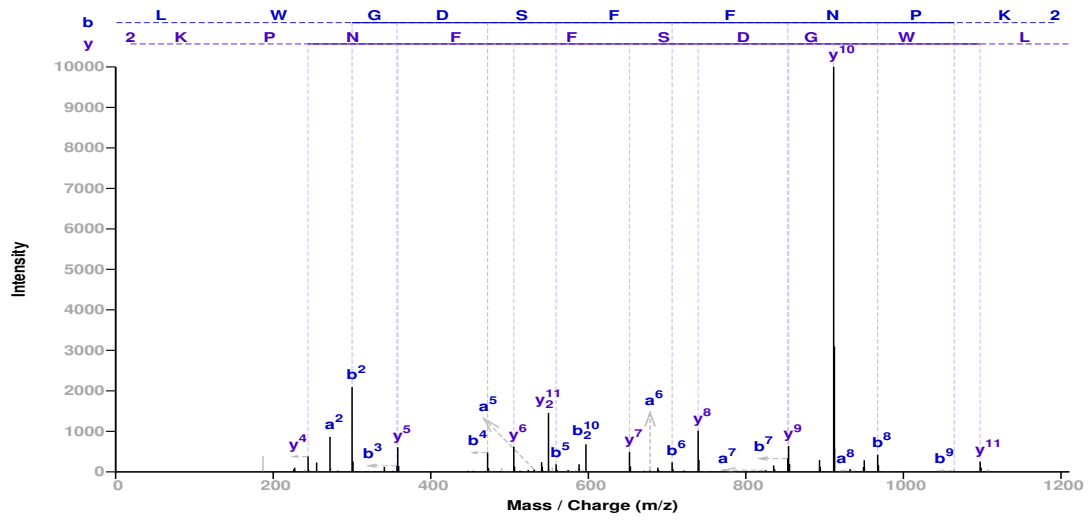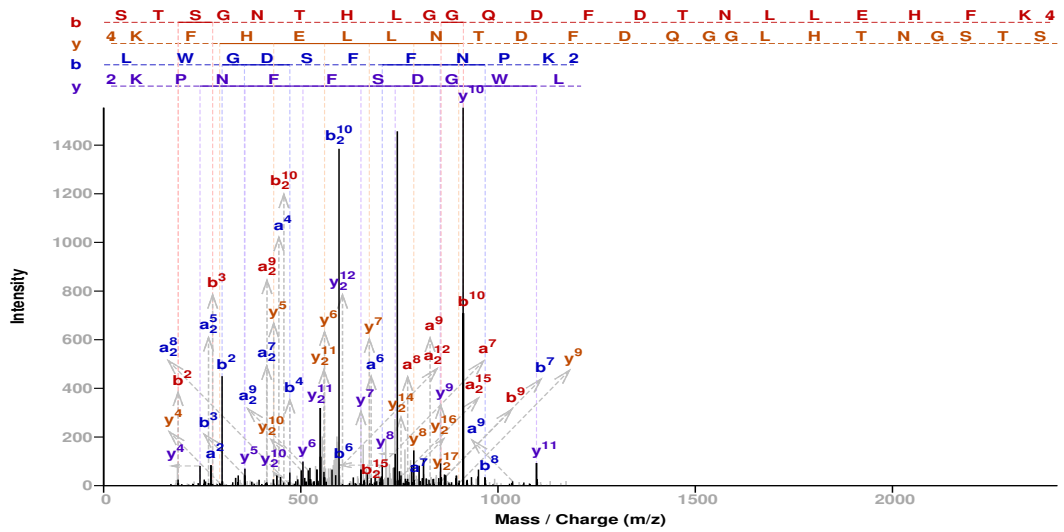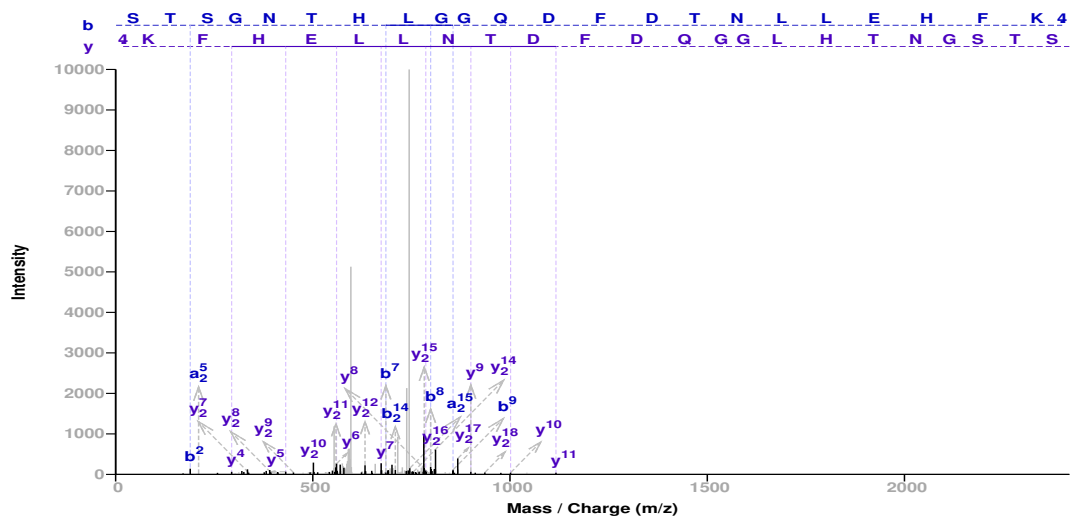

yeast01\_Scan\_Number\_1408 Precursor m/z: 442.718 cosine: 0.896  $\alpha$ : 0.758

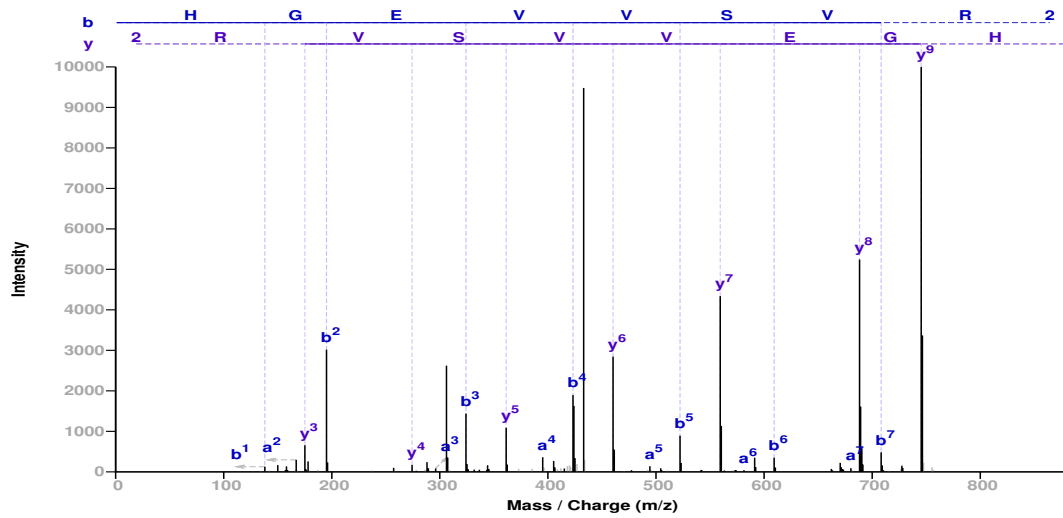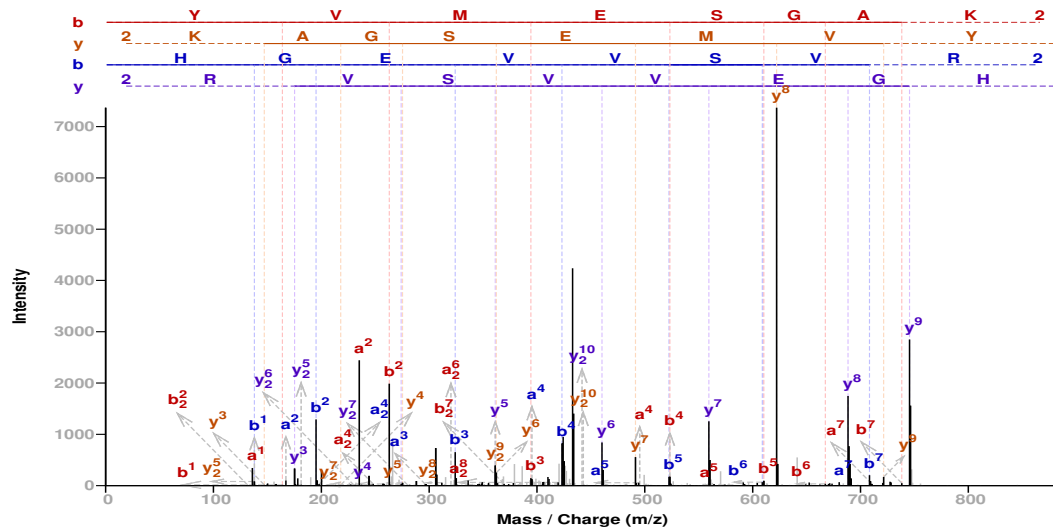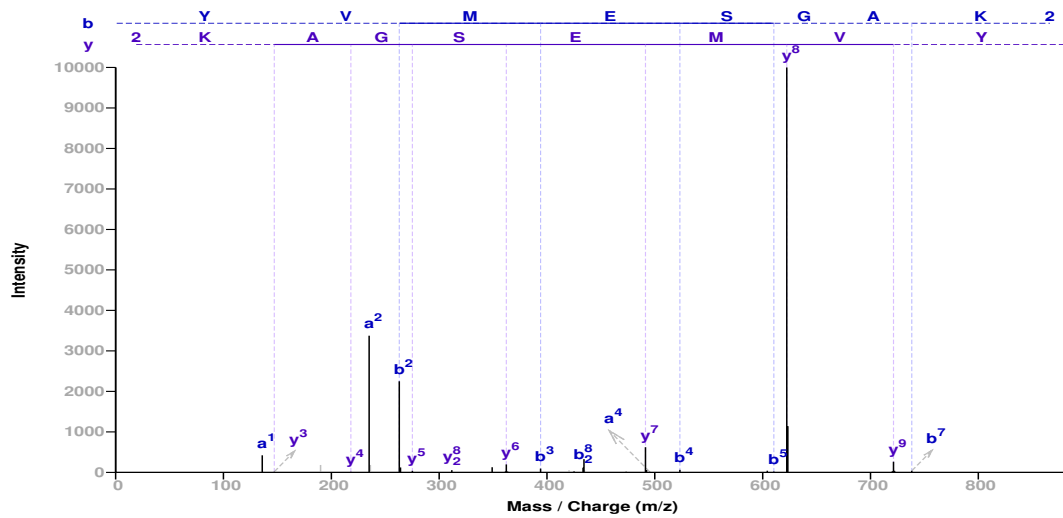

yeast01\_Scan\_Number\_3588 Precursor m/z: 484.742 cosine: 0.801  $\alpha$ : 0.745

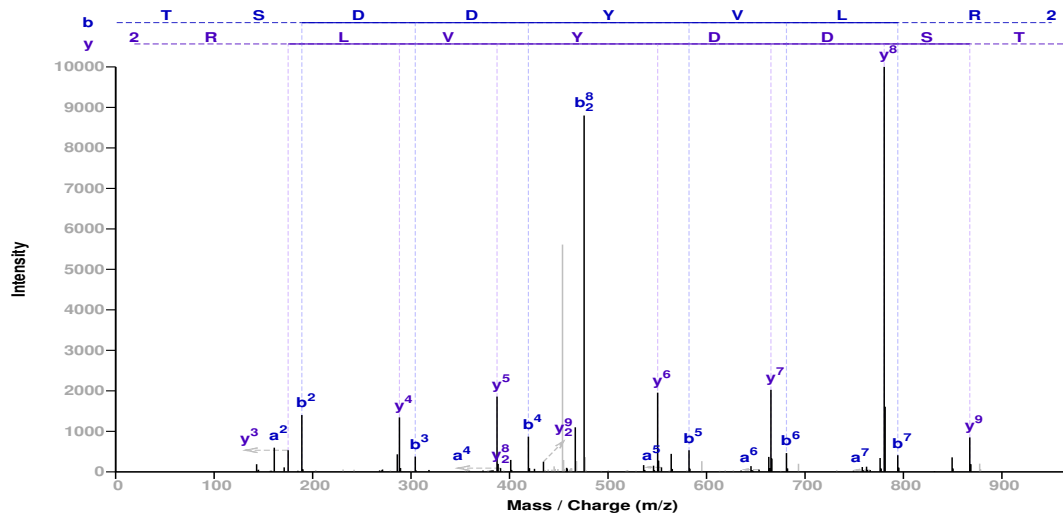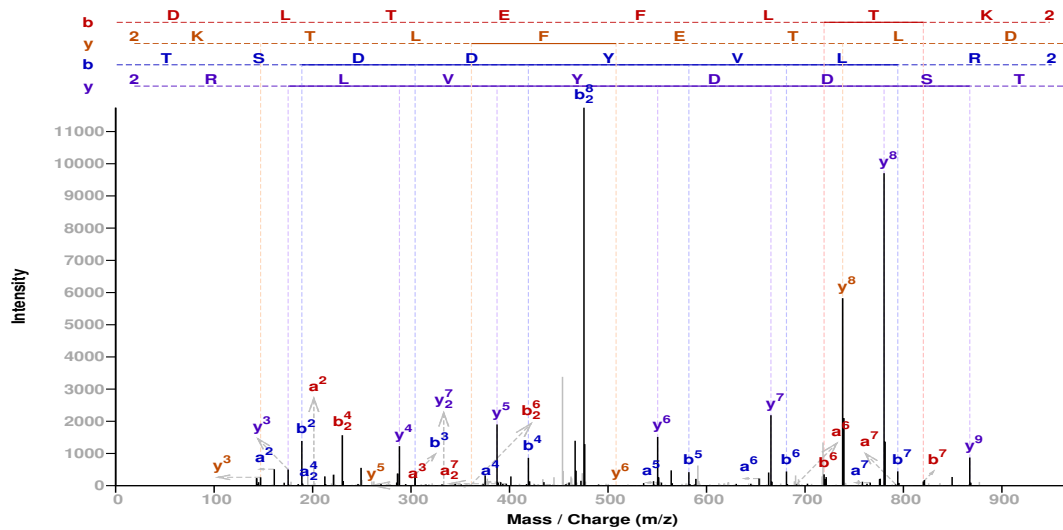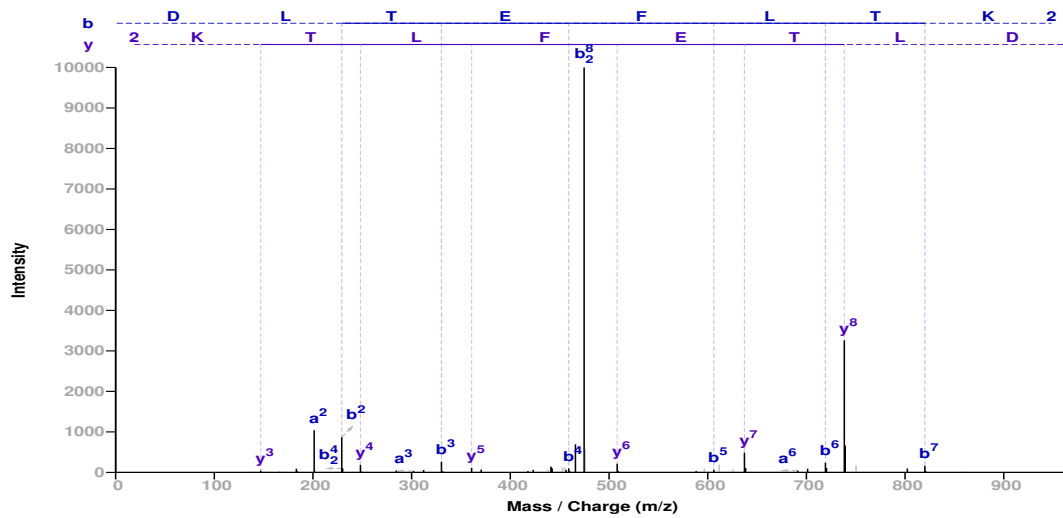

yeast01\_Scan\_Number\_6163 Precursor m/z: 692.817 cosine: 0.762  $\alpha$ : 0.745

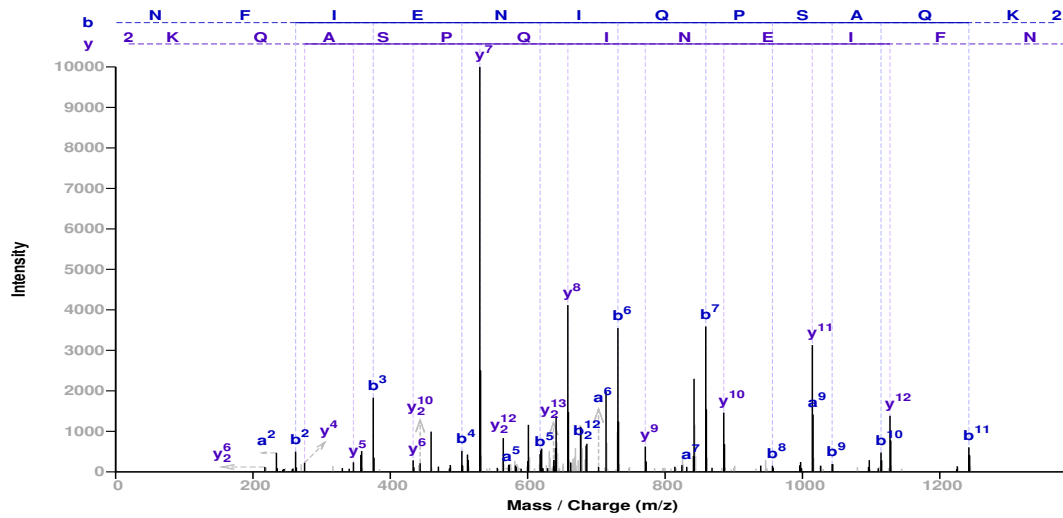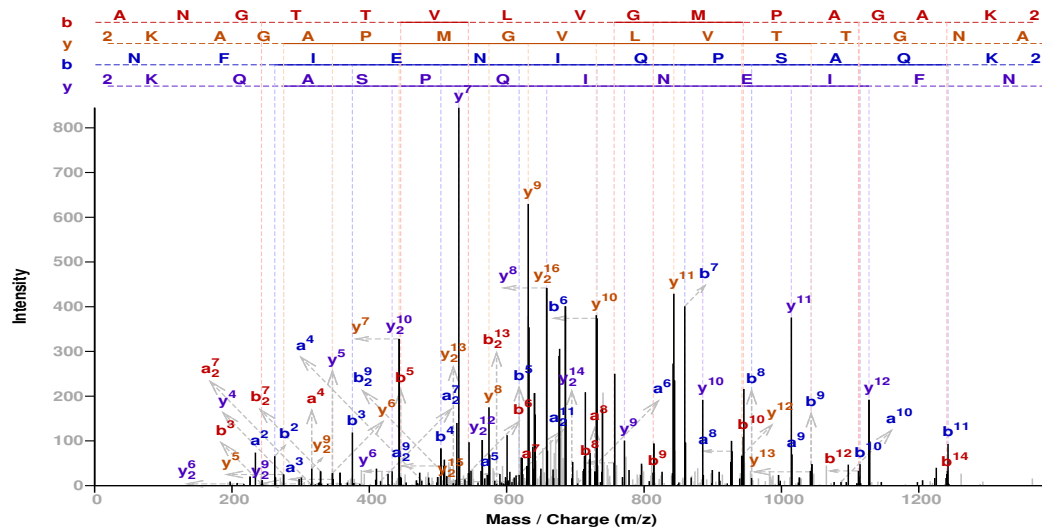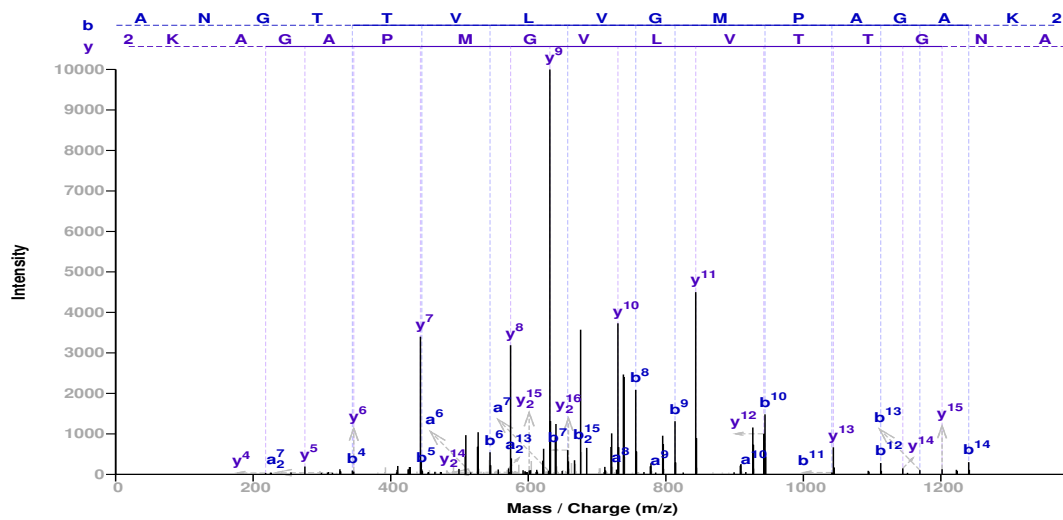



yeast01.Scan\_Number\_10445 Precursor m/z: 789.914 cosine: 0.771  $\alpha$ : 0.739

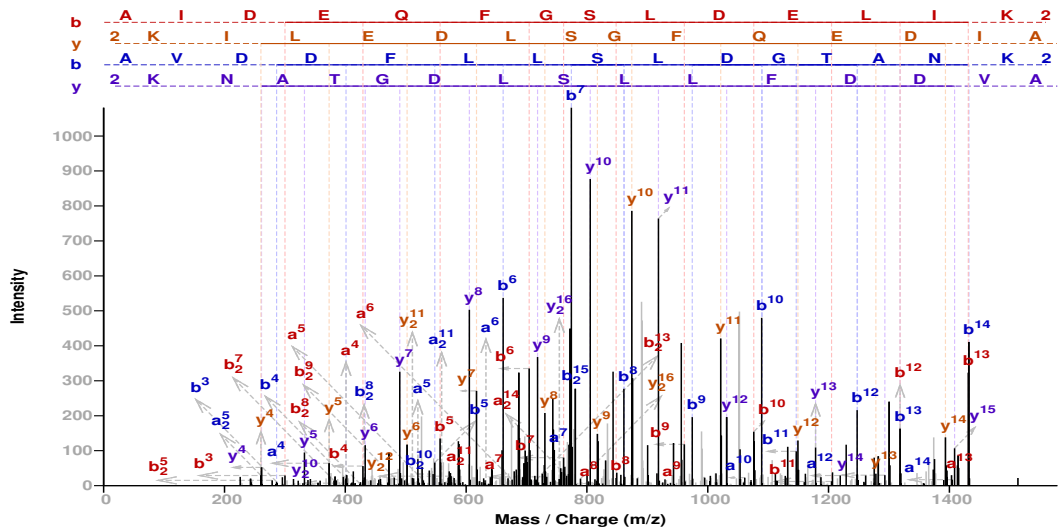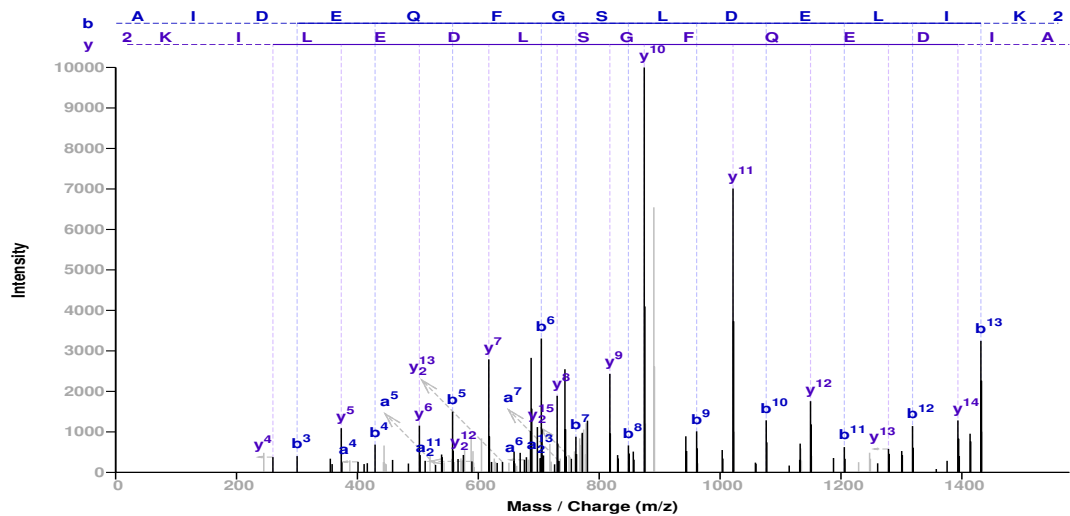

yeast01.Scan\_Number\_5343 Precursor m/z: 432.229 cosine: 0.778  $\alpha$ : 0.730

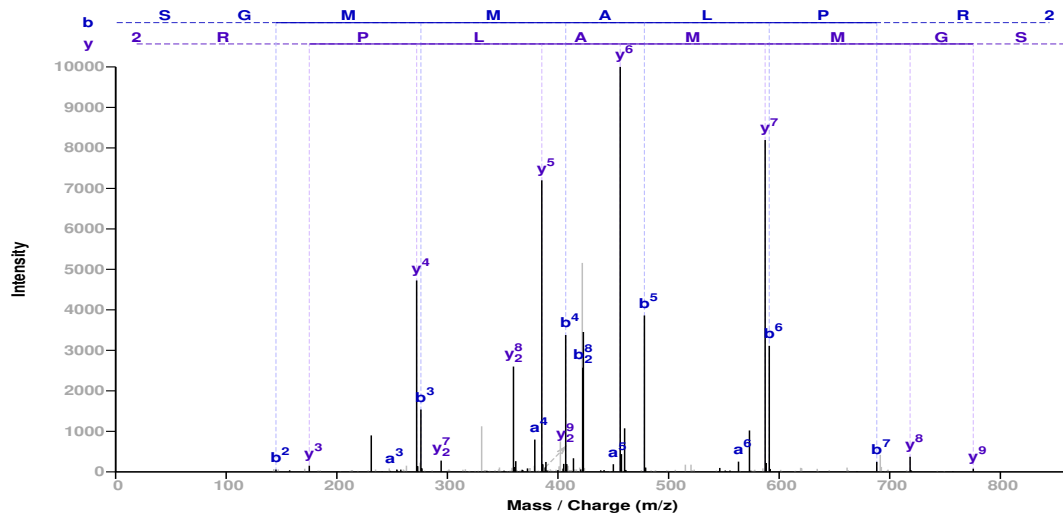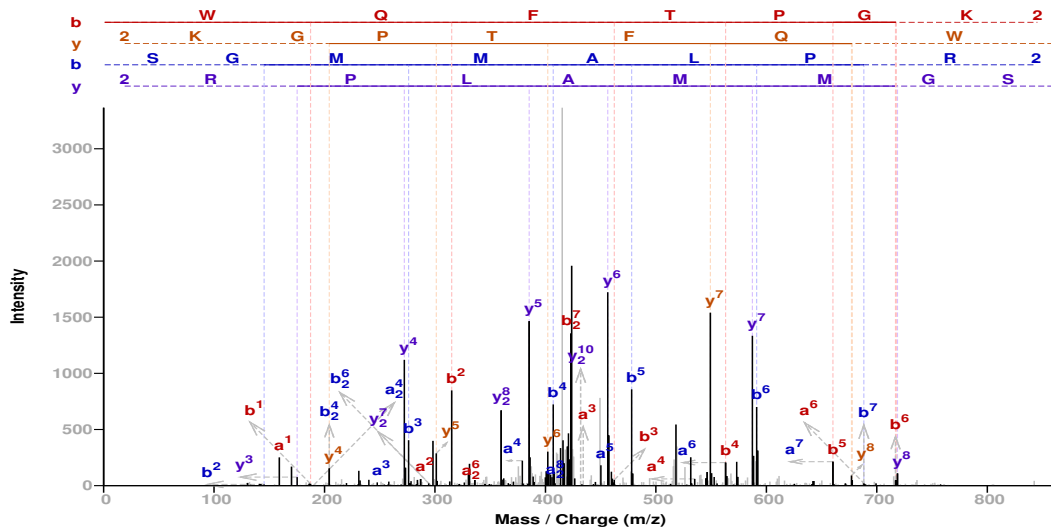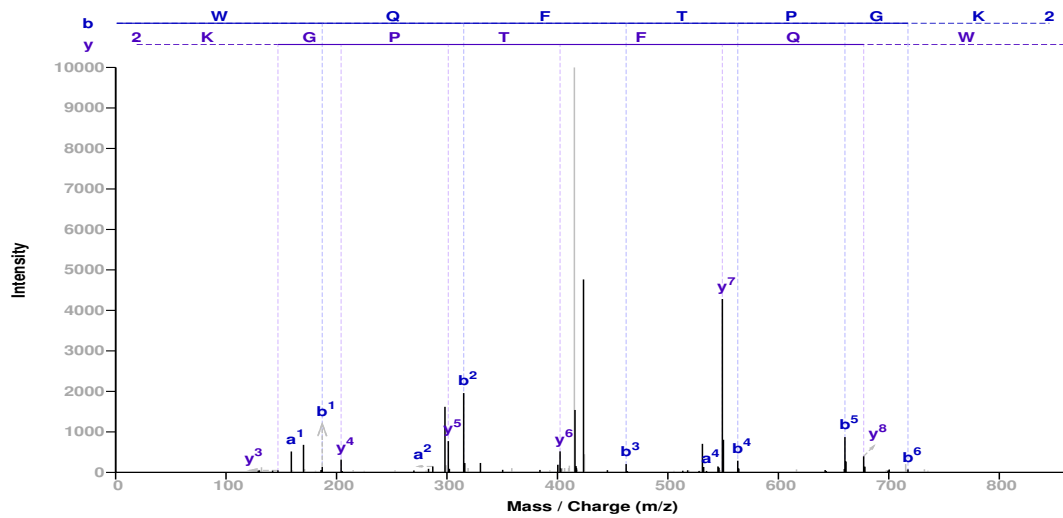

yeast01\_Scan\_Number\_4260 Precursor m/z: 378.885 cosine: 0.802  $\alpha$ : 0.724

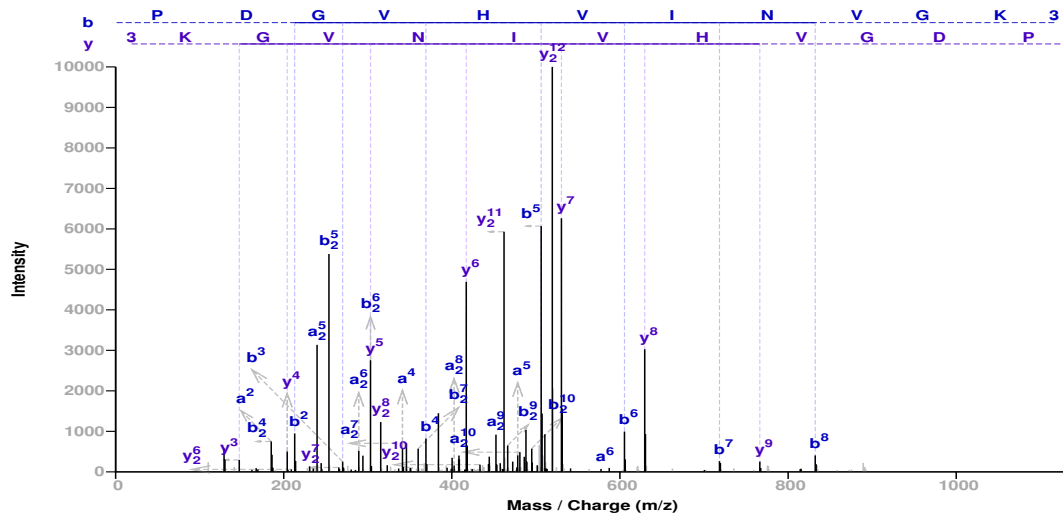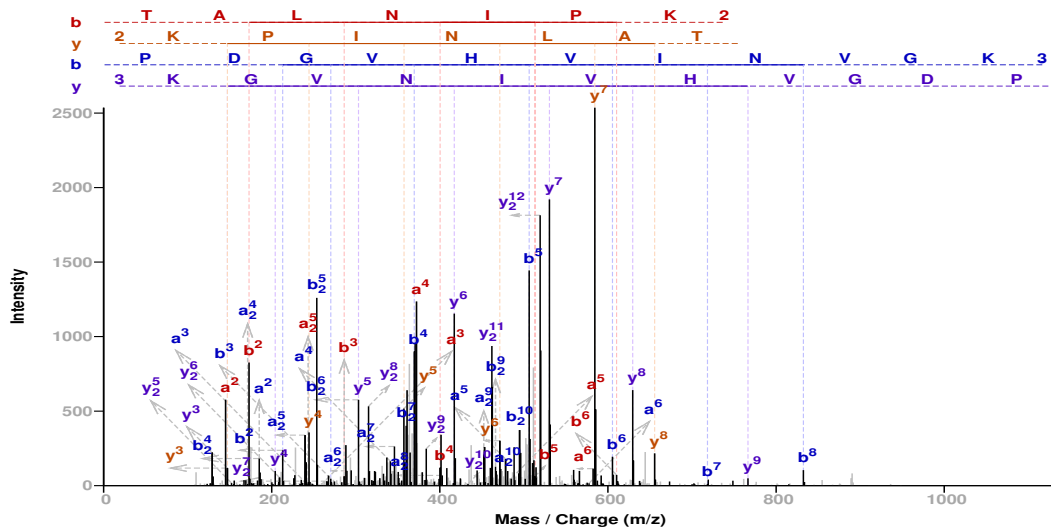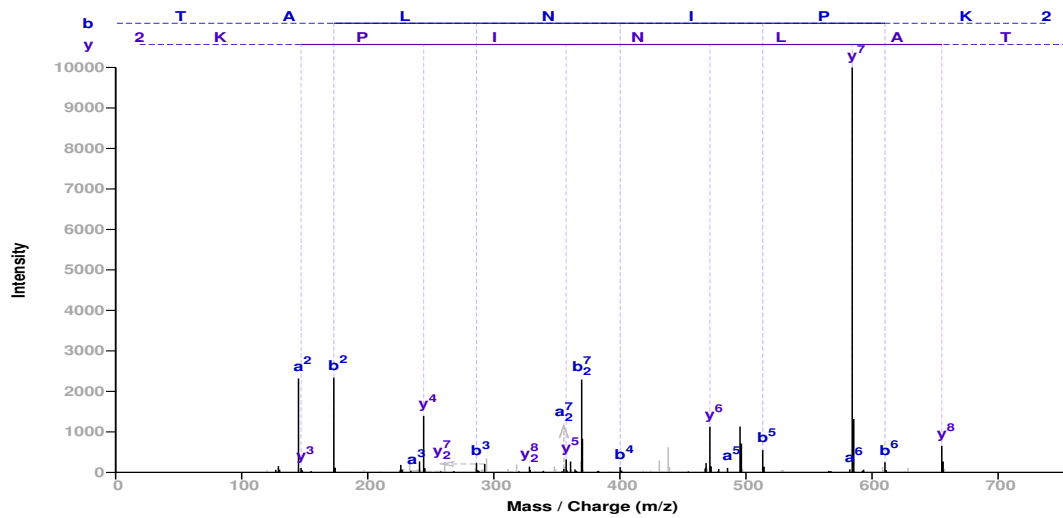

yeast01.Scan\_Number\_5223 Precursor m/z: 532.790 cosine: 0.749  $\alpha$ : 0.717

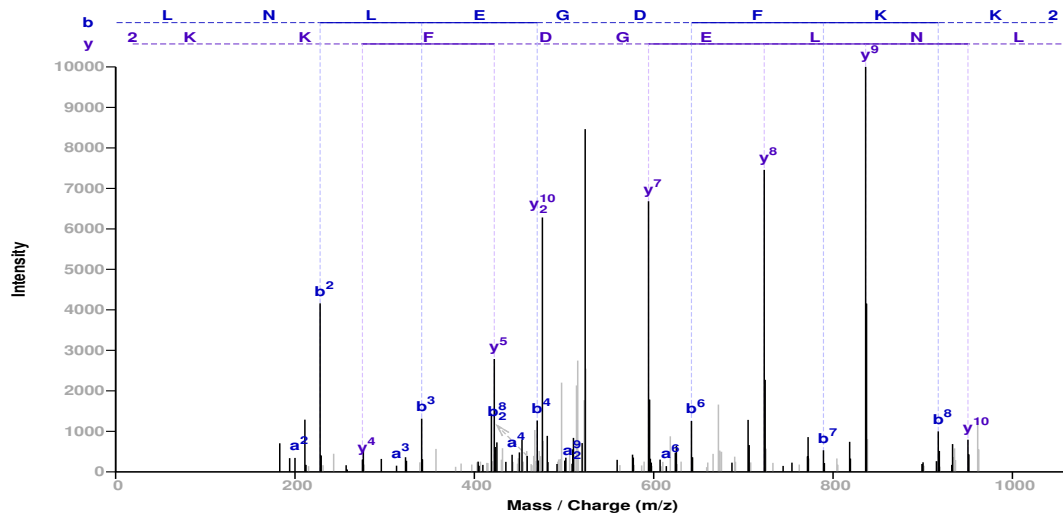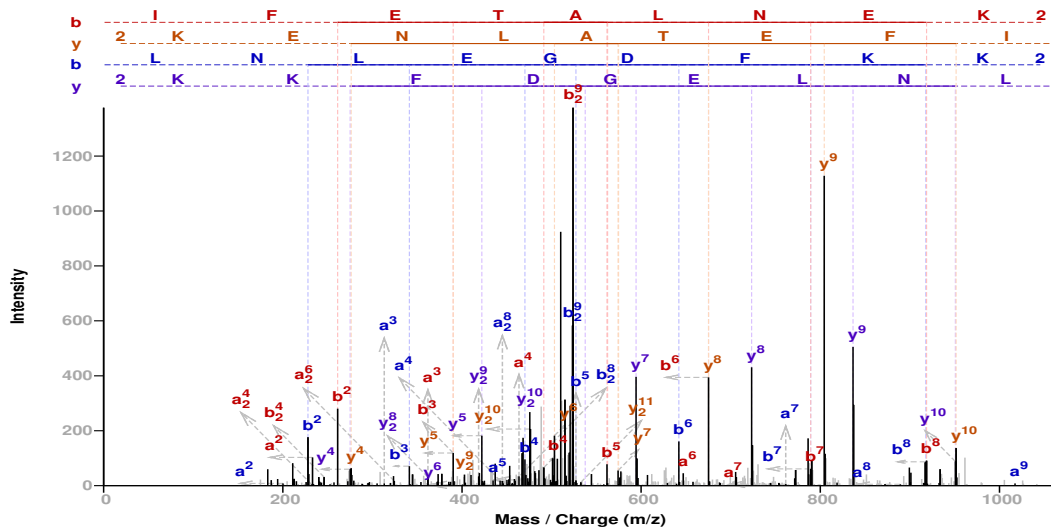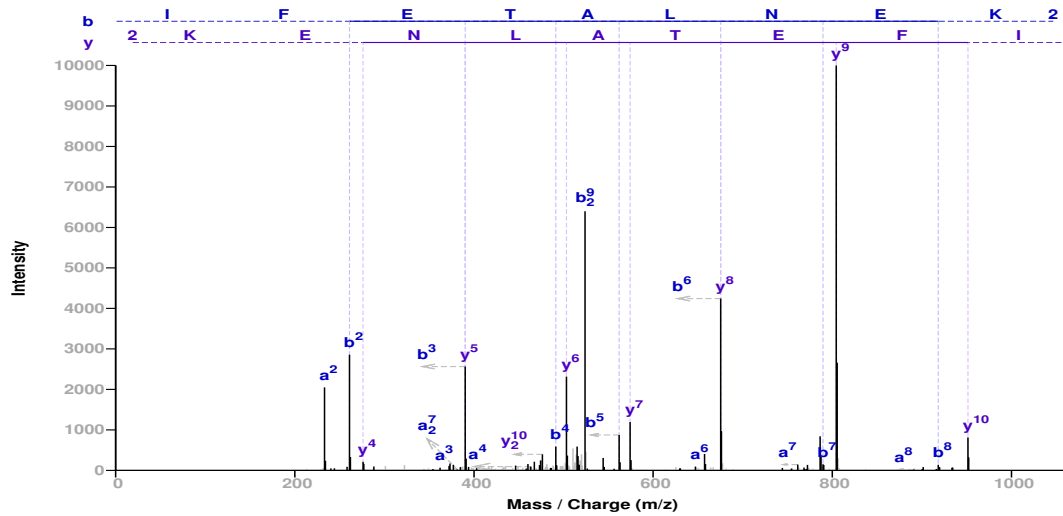

yeast01\_Scan\_Number\_7878 Precursor m/z: 442.945 cosine: 0.797  $\alpha$ : 0.716

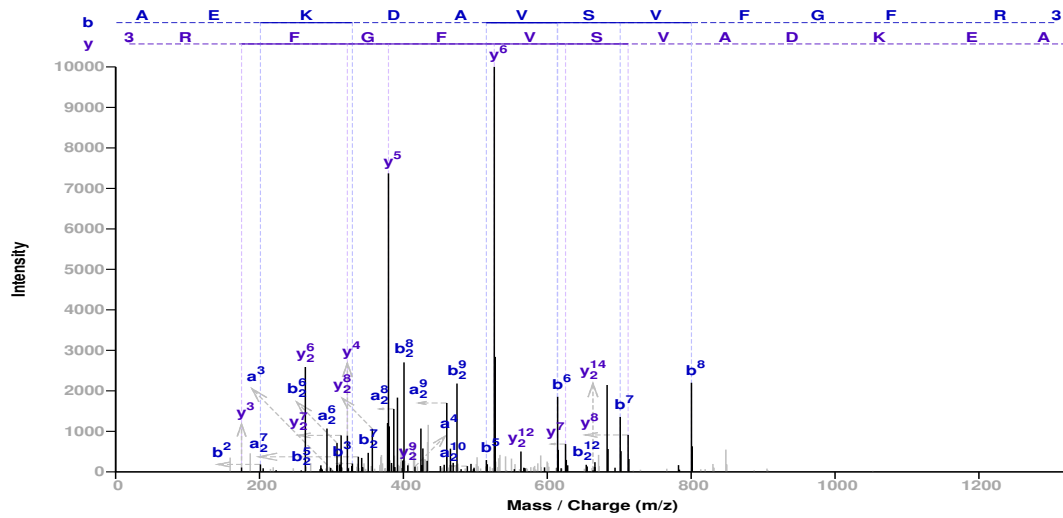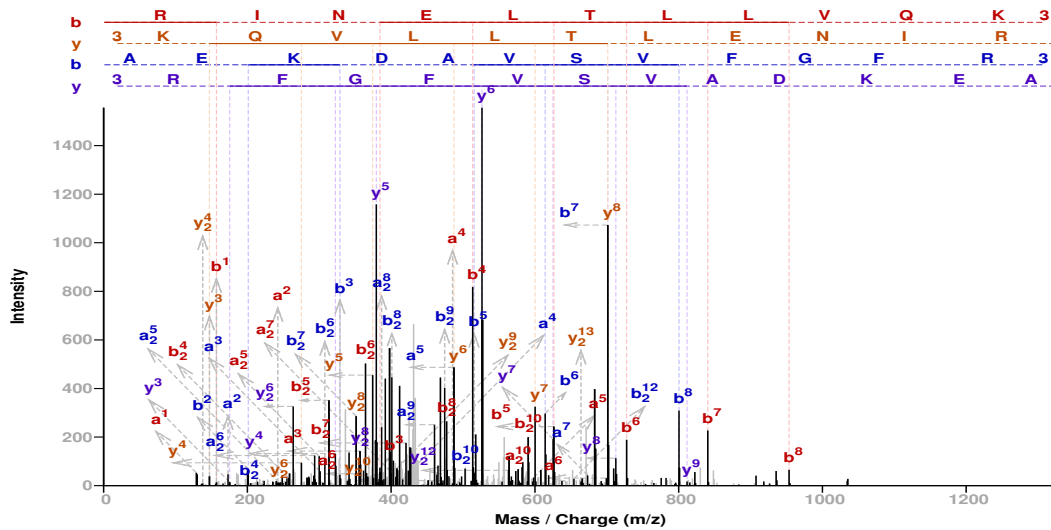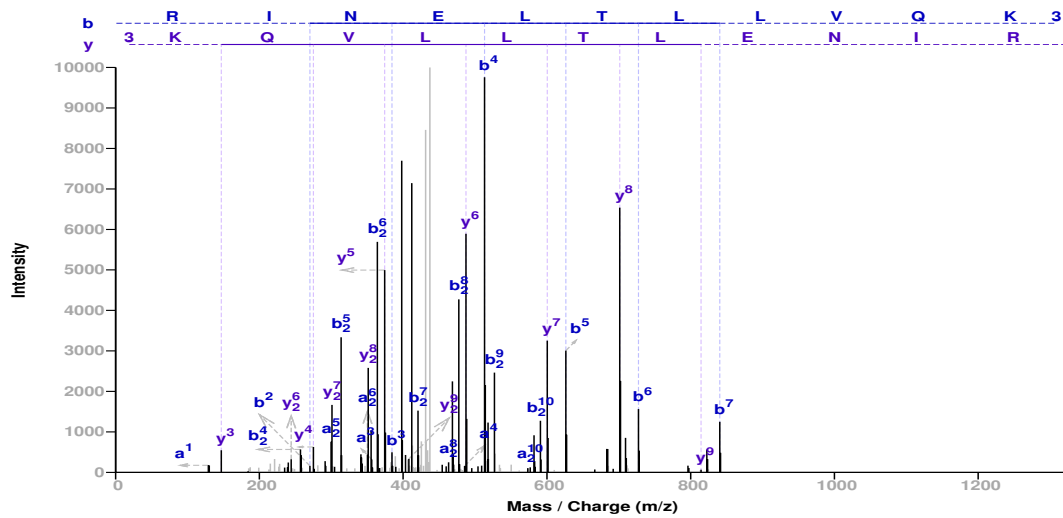

yeast01\_Scan\_Number\_4838 Precursor m/z: 485.997 cosine: 0.870  $\alpha$ : 0.709

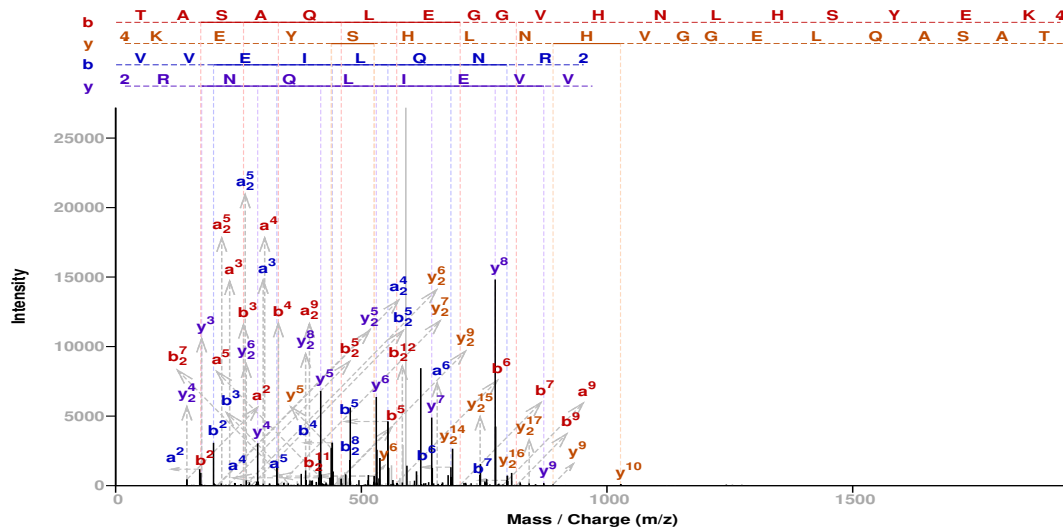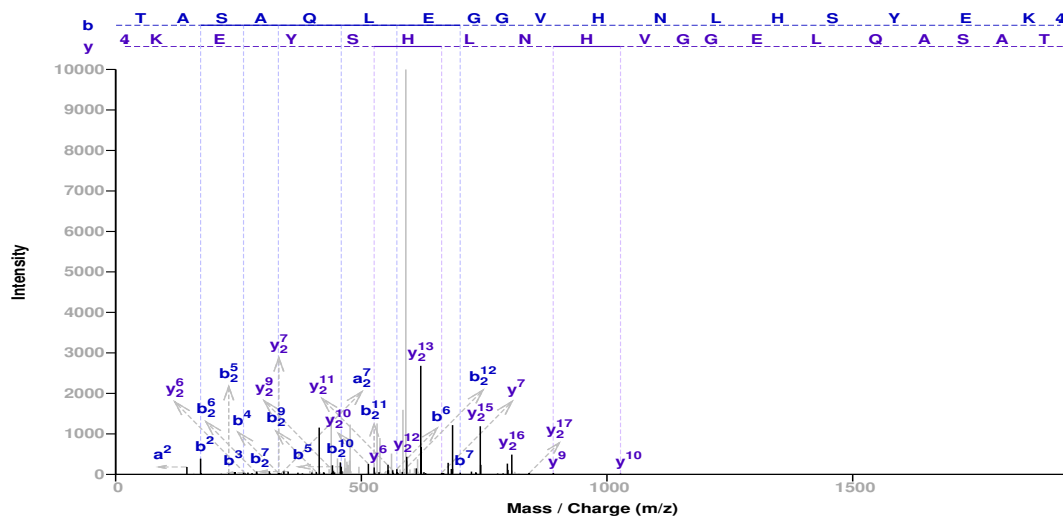

yeast01\_Scan\_Number\_2344 Precursor m/z: 610.838 cosine: 0.836  $\alpha$ : 0.695

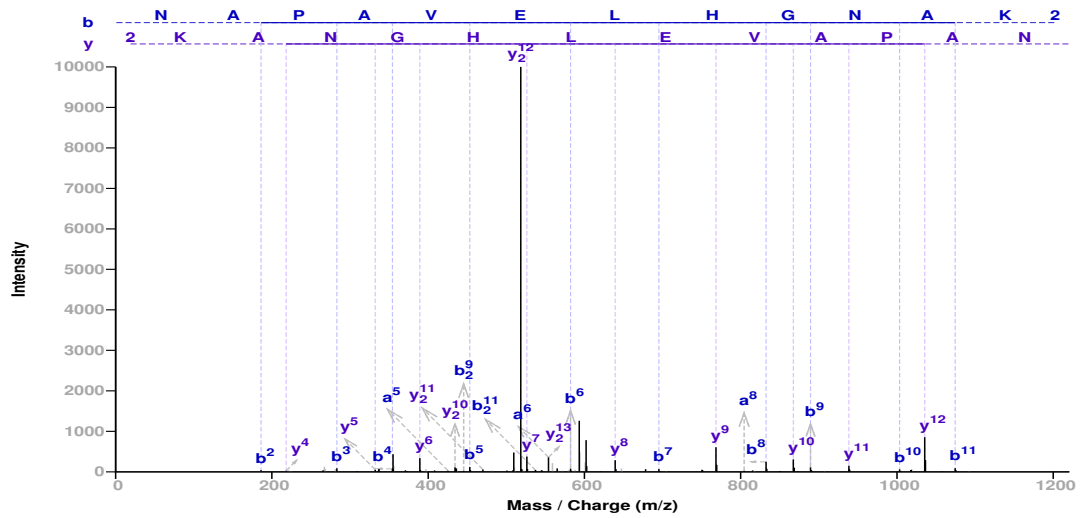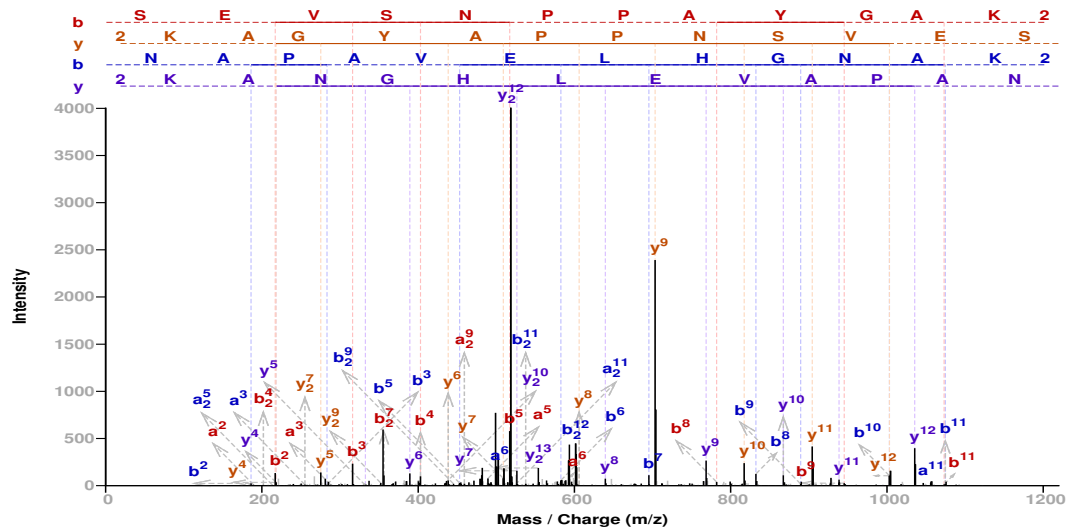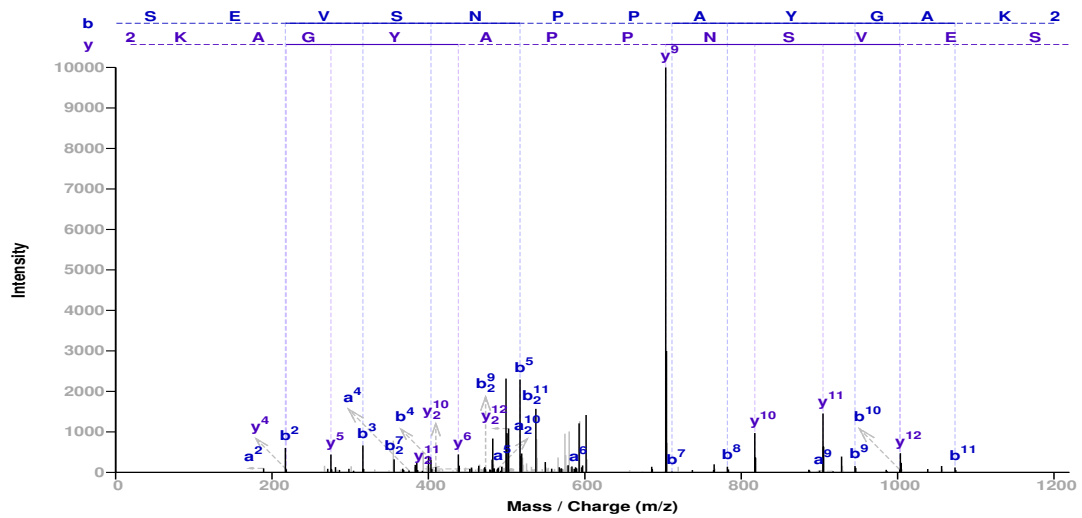

yeast01\_Scan\_Number\_6718 Precursor m/z: 851.943 cosine: 0.893  $\alpha$ : 0.681

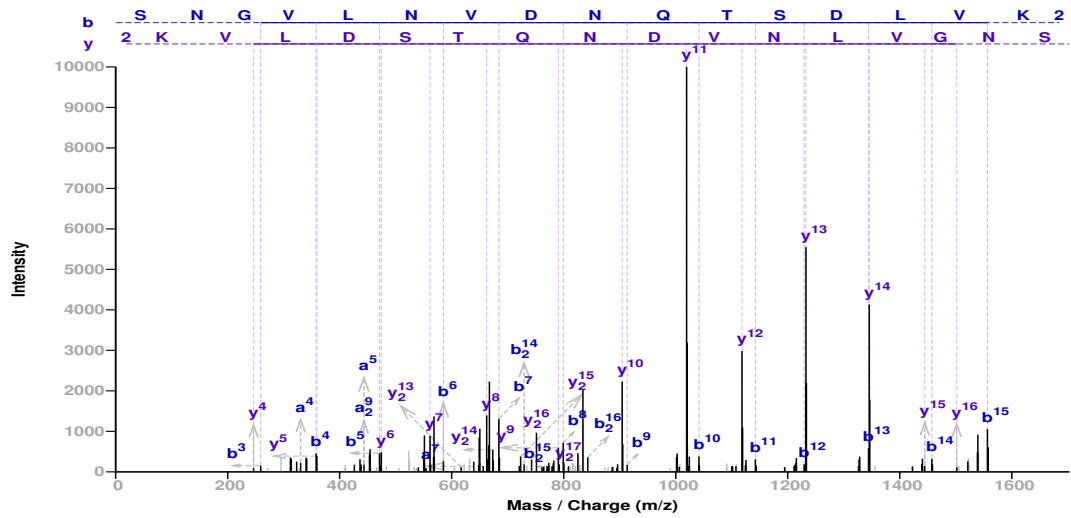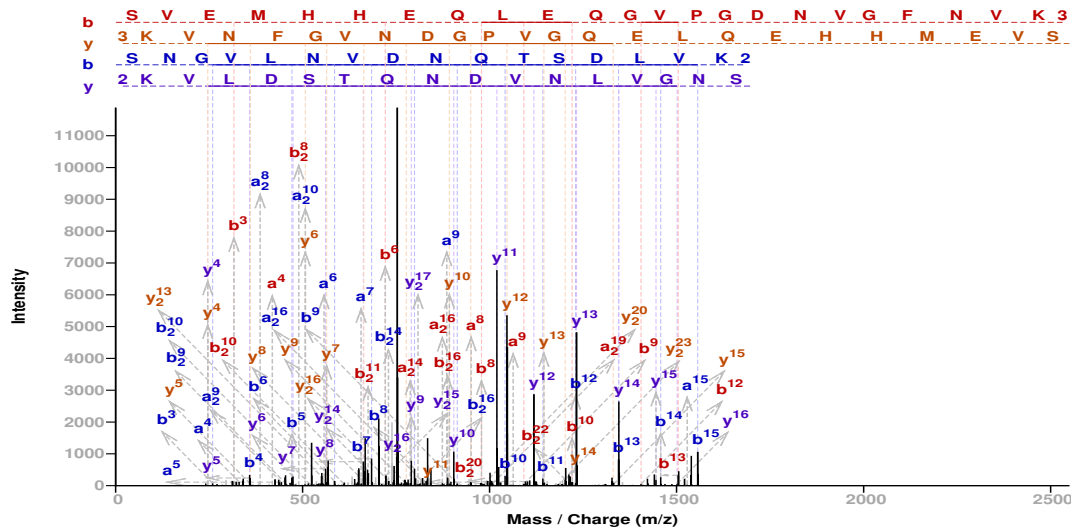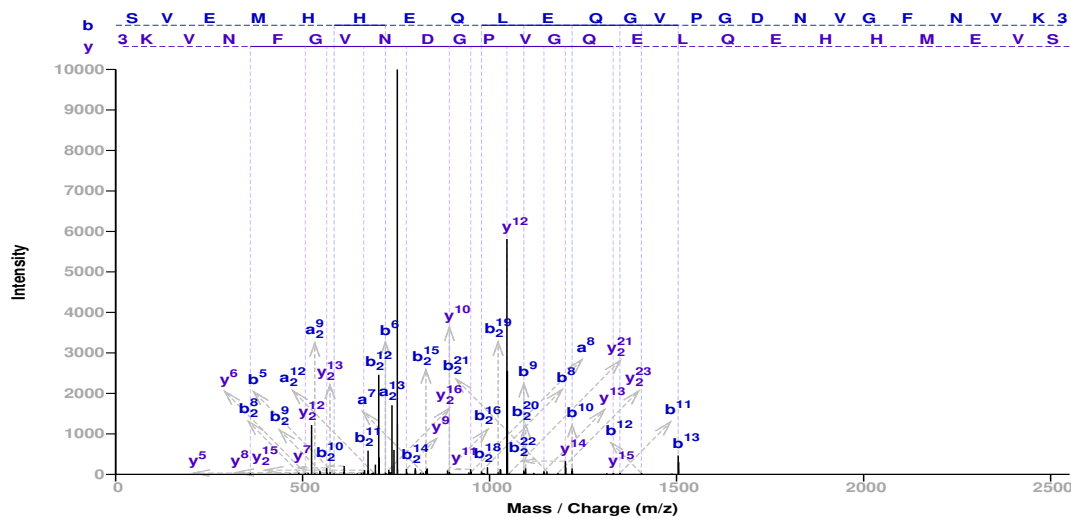



yeast01\_Scan\_Number\_3052 Precursor m/z: 470.745 cosine: 0.770  $\alpha$ : 0.675

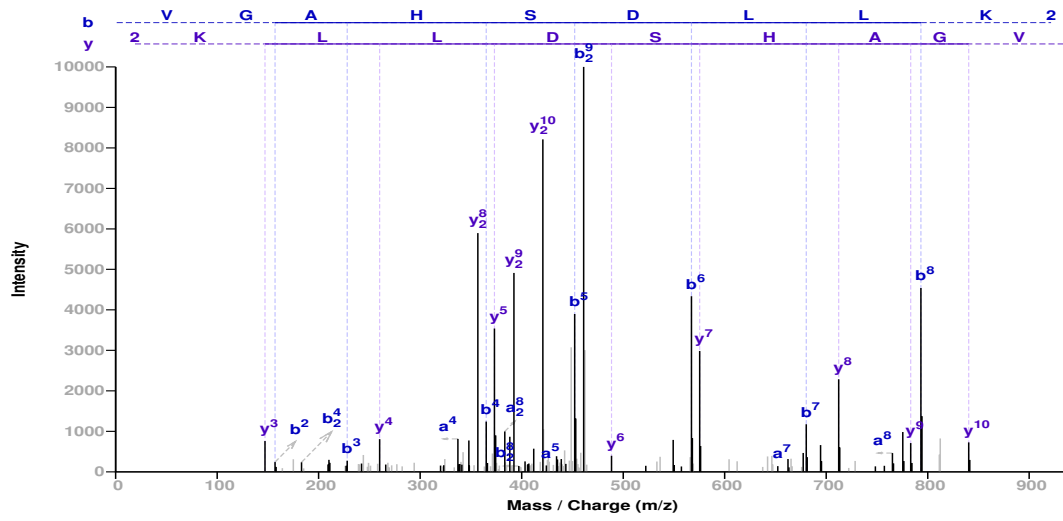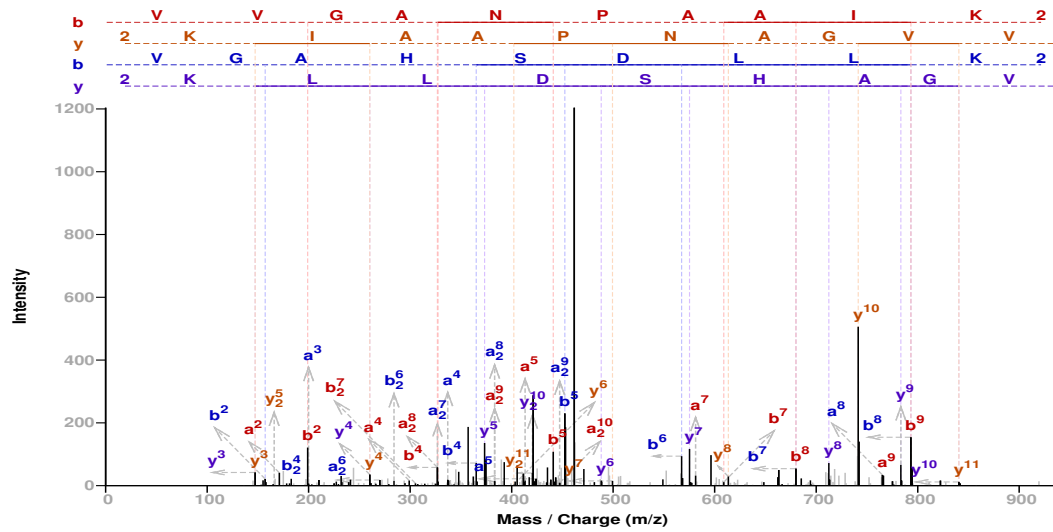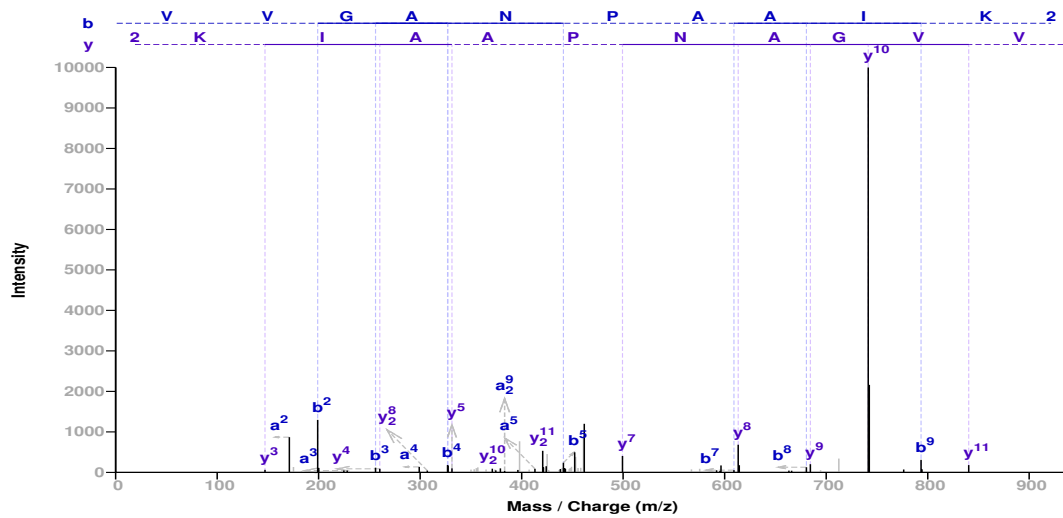



yeast01.Scan\_Number\_2125 Precursor m/z: 301.159 cosine: 0.733  $\alpha$ : 0.668

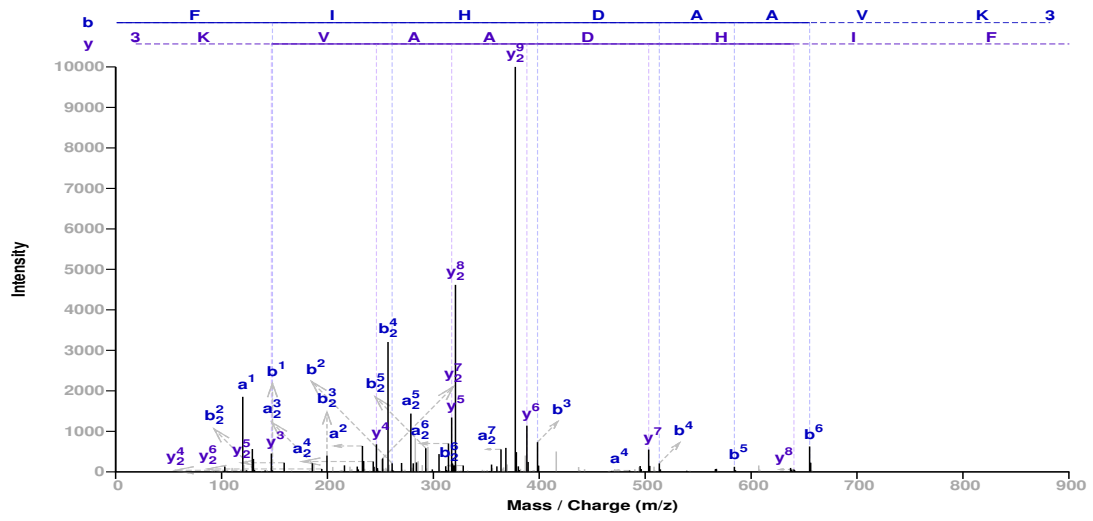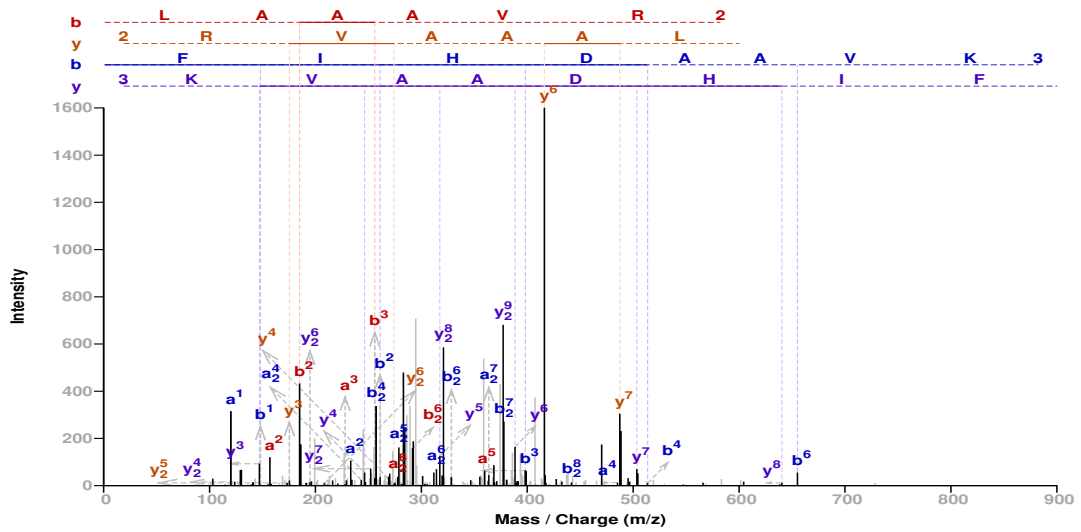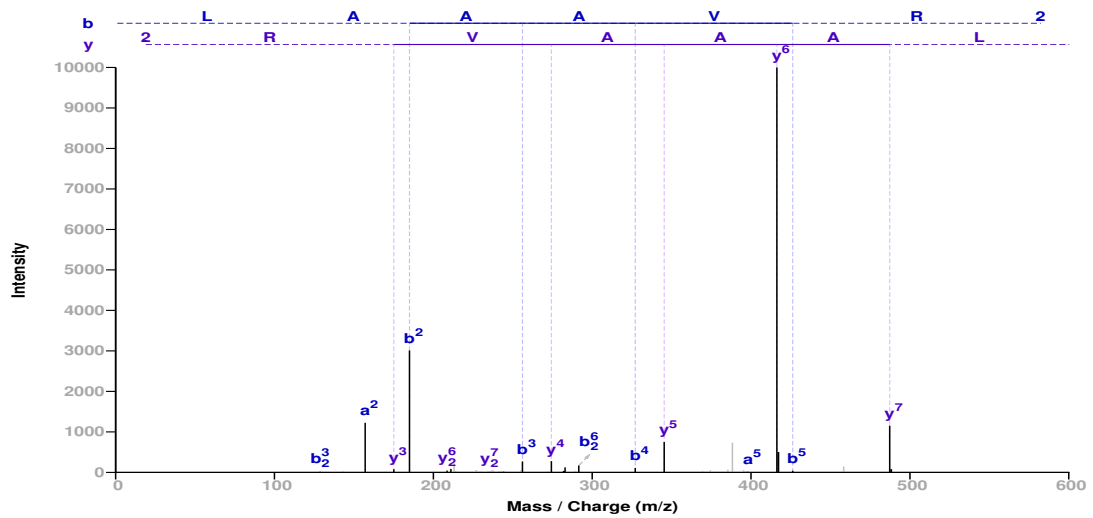

yeast01\_Scan\_Number\_8326 Precursor m/z: 559.799 cosine: 0.807  $\alpha$ : 0.664

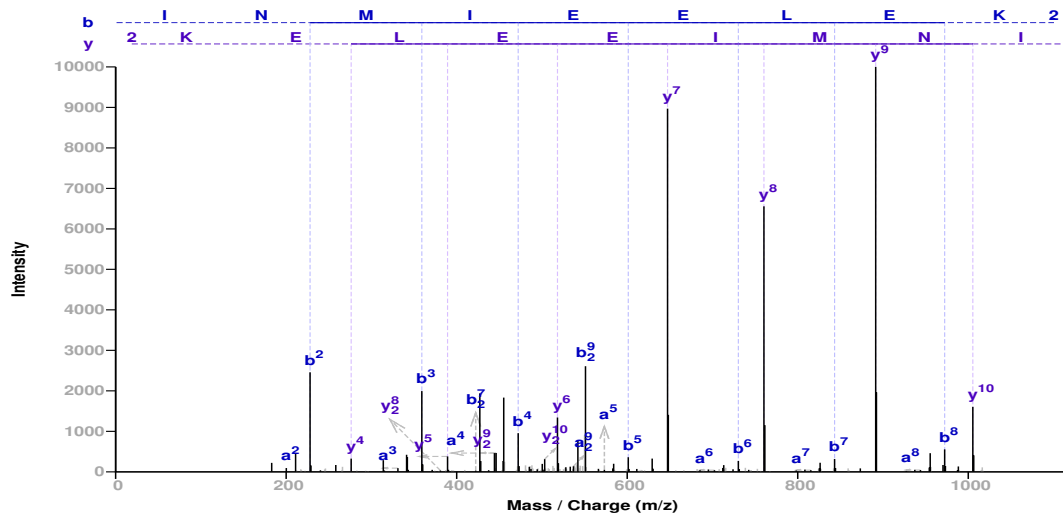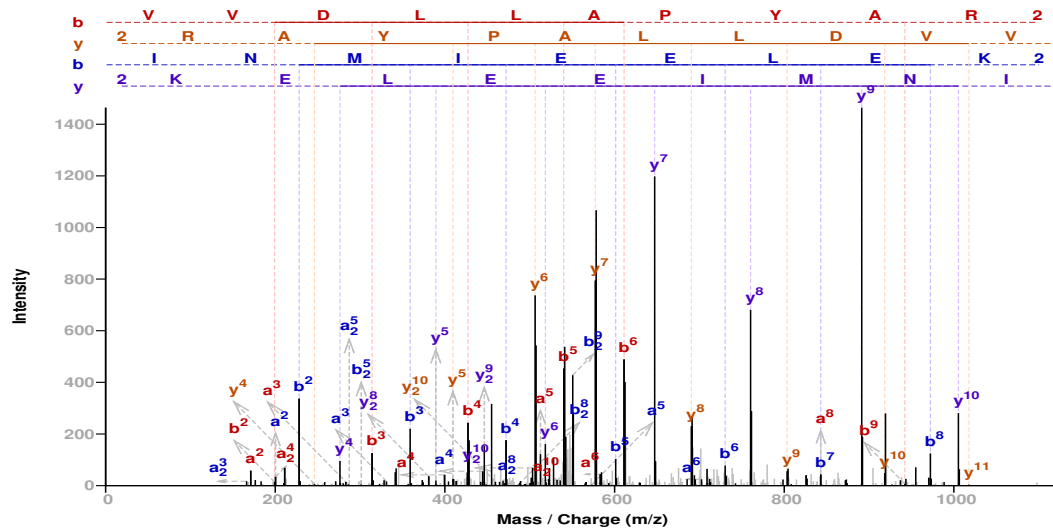

yeast01\_Scan\_Number\_3803 Precursor m/z: 493.293 cosine: 0.808  $\alpha$ : 0.656

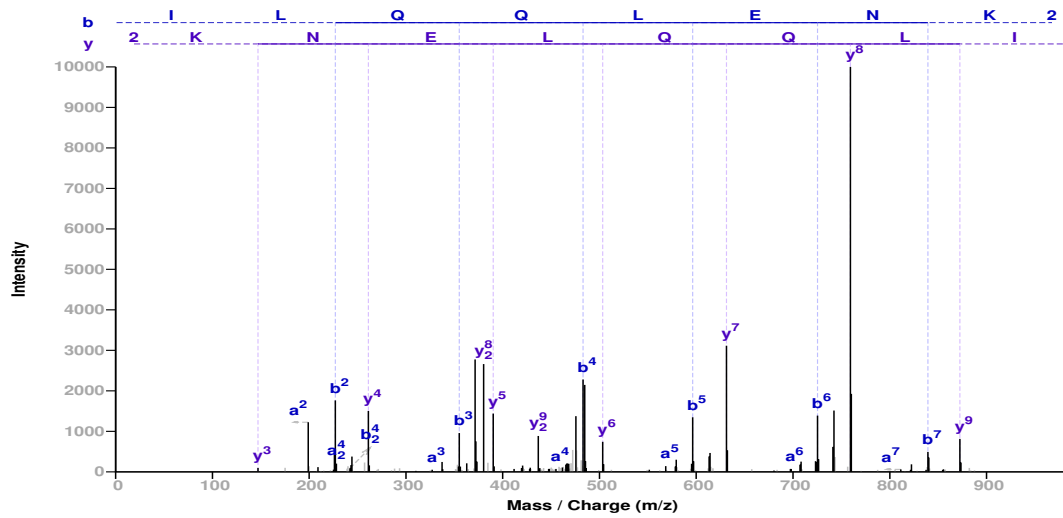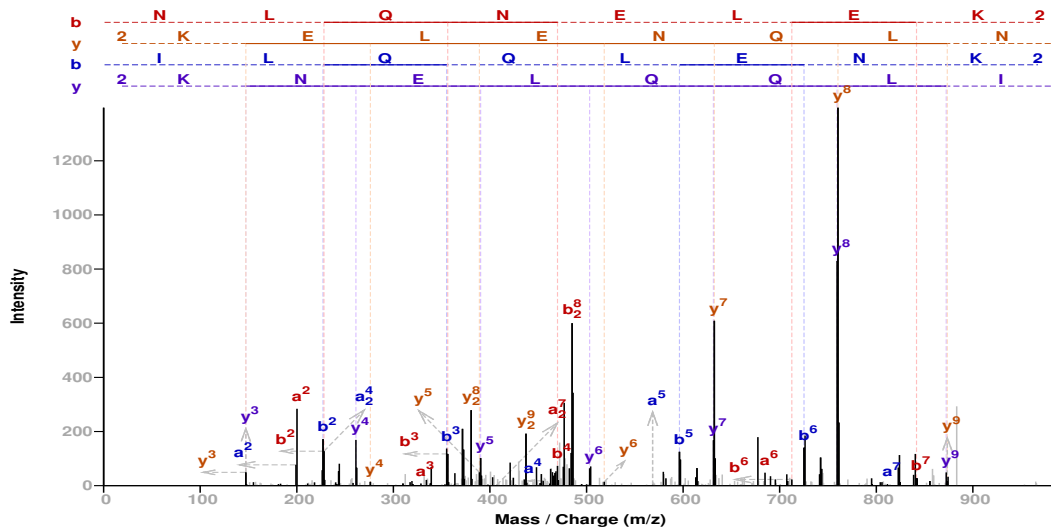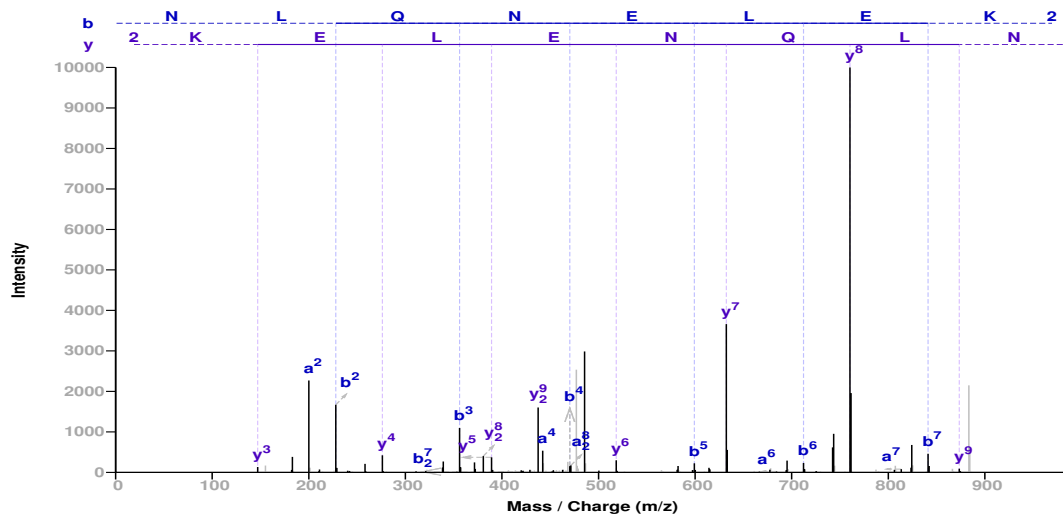



yeast01\_Scan\_Number\_4250 Precursor m/z: 372.721 cosine: 0.828  $\alpha$ : 0.647

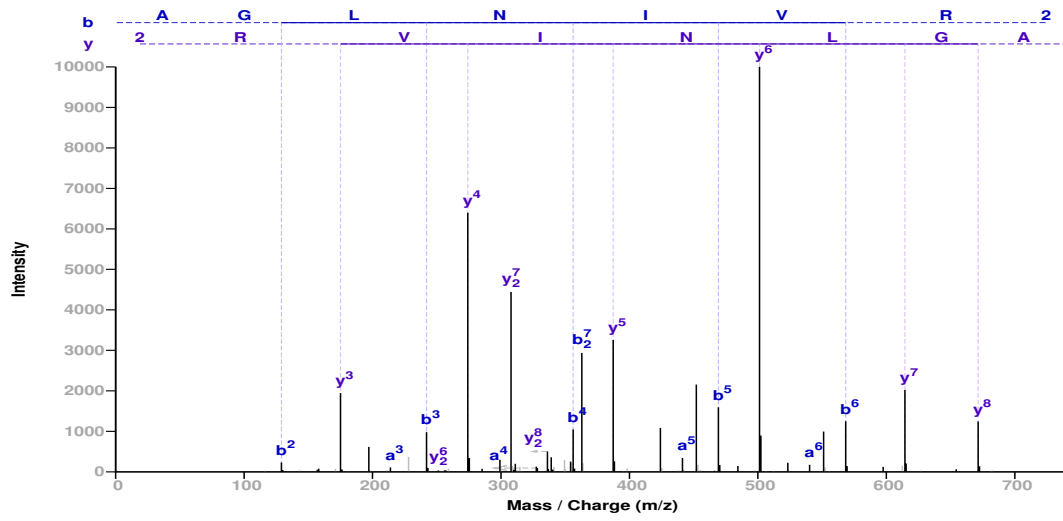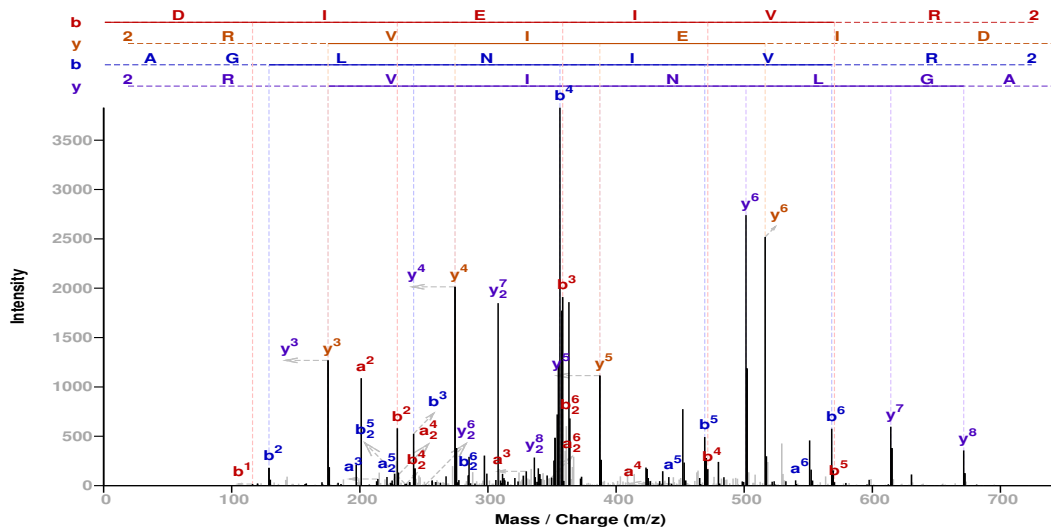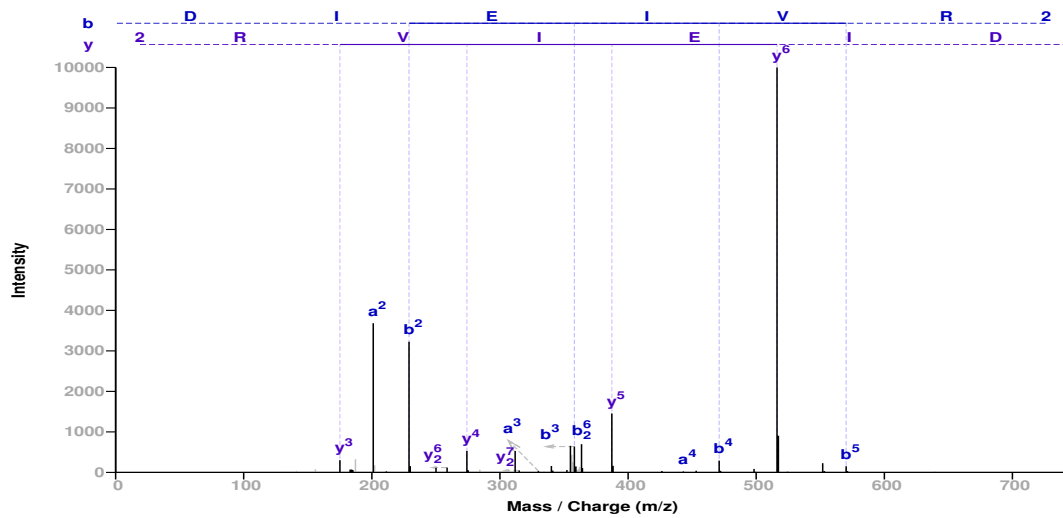

yeast01\_Scan\_Number\_1441 Precursor m/z: 515.251 cosine: 0.827  $\alpha$ : 0.642

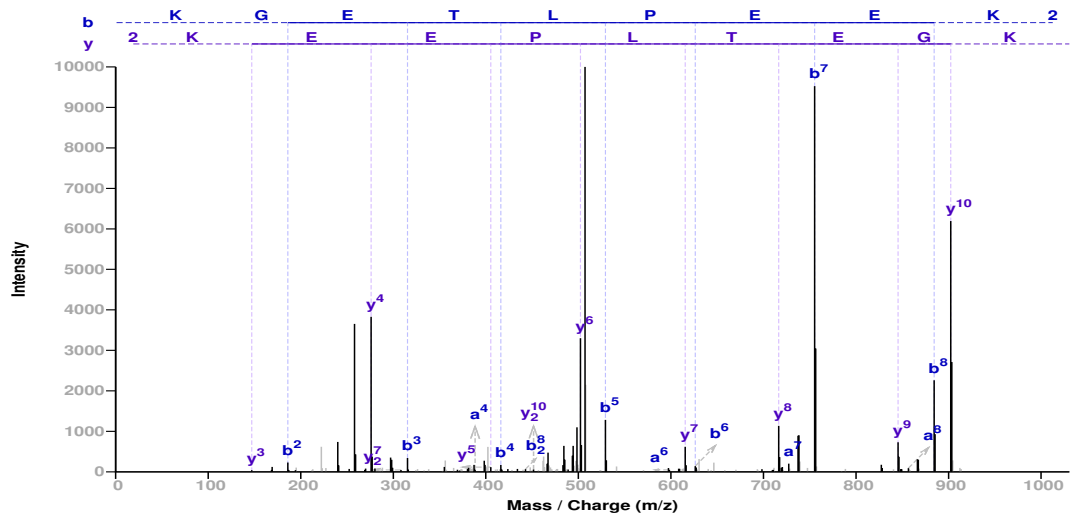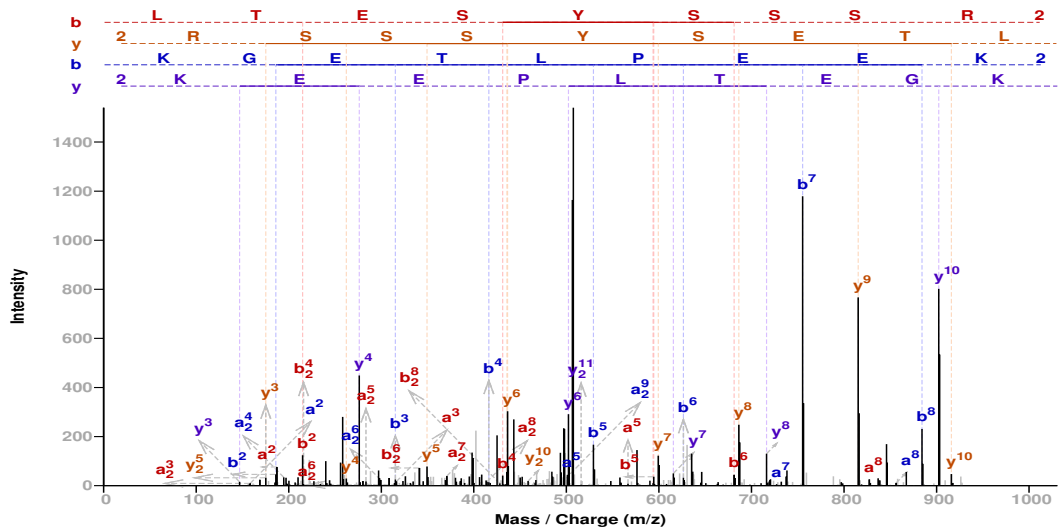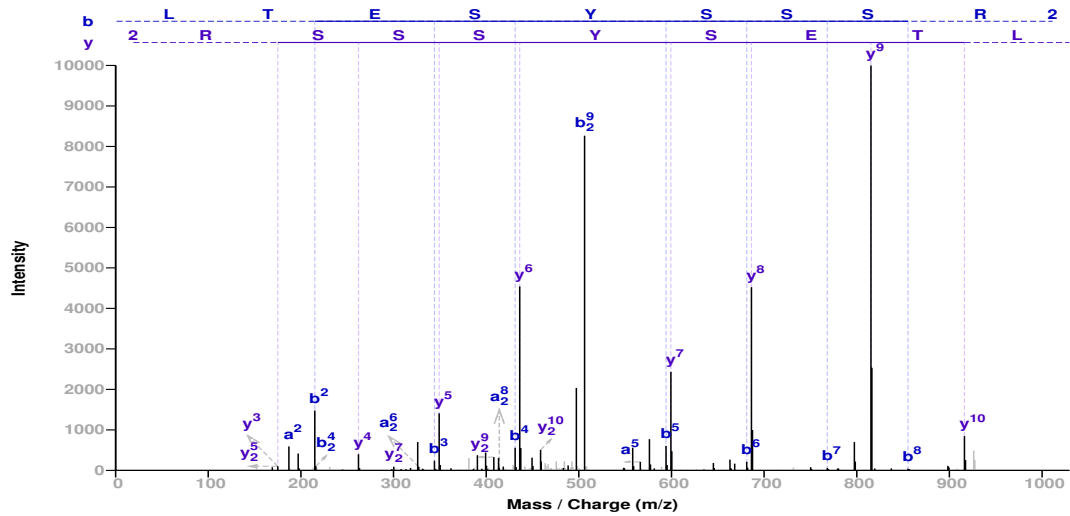





yeast01\_Scan\_Number\_2006 Precursor m/z: 509.253 cosine: 0.879  $\alpha$ : 0.636

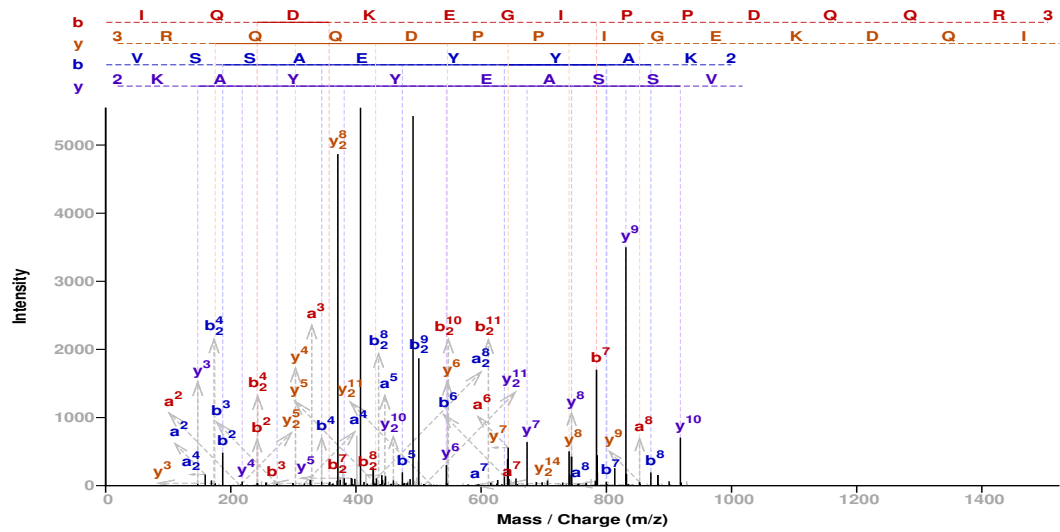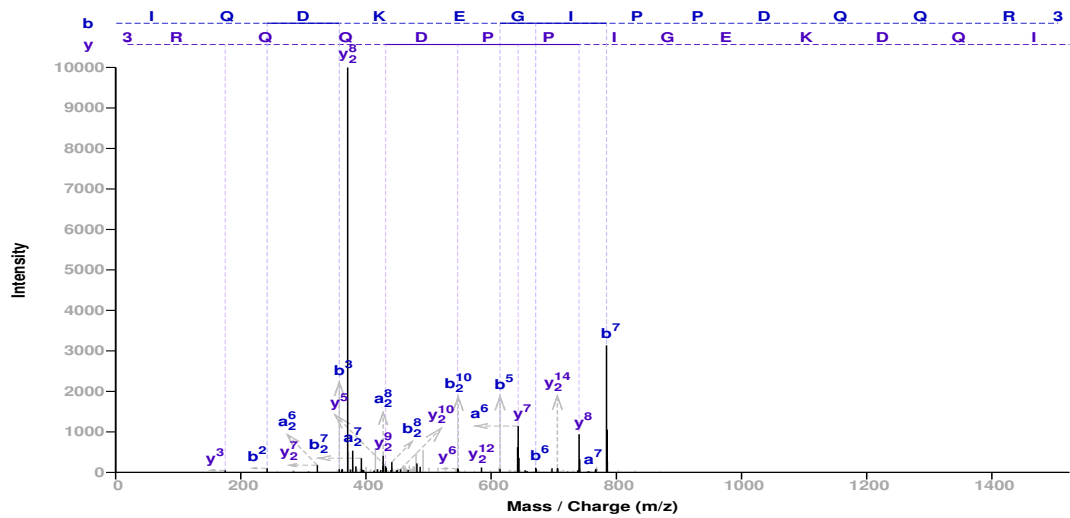

yeast01\_Scan\_Number\_7200 Precursor m/z: 435.791 cosine: 0.770  $\alpha$ : 0.633

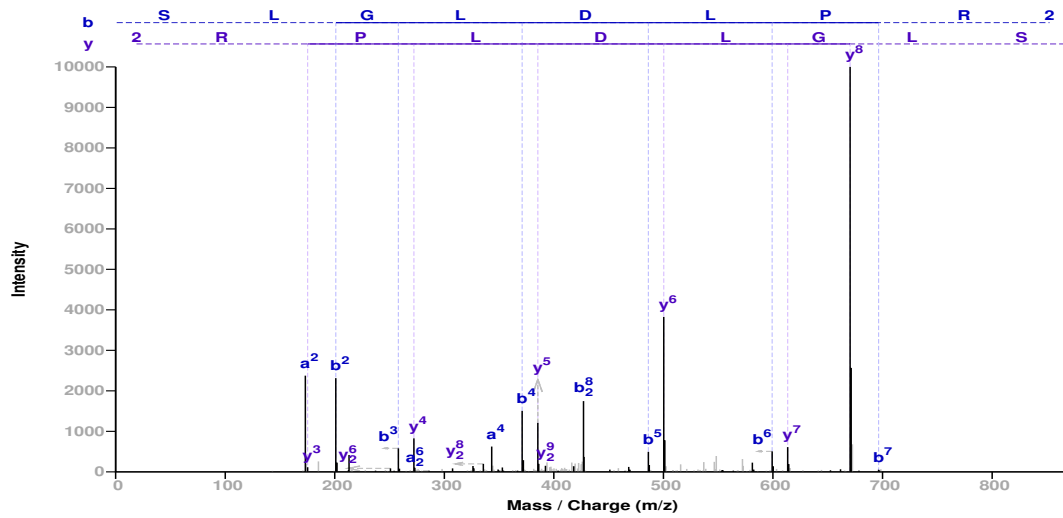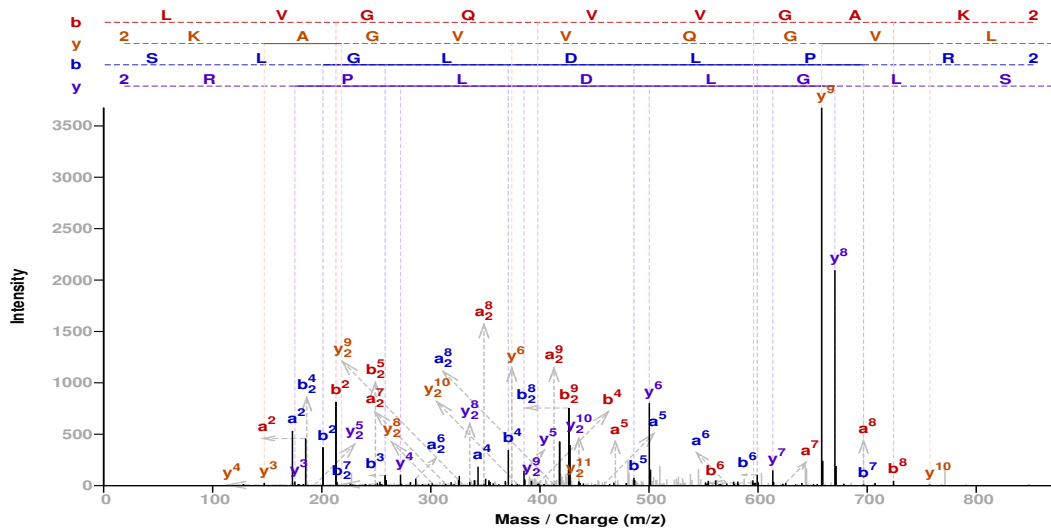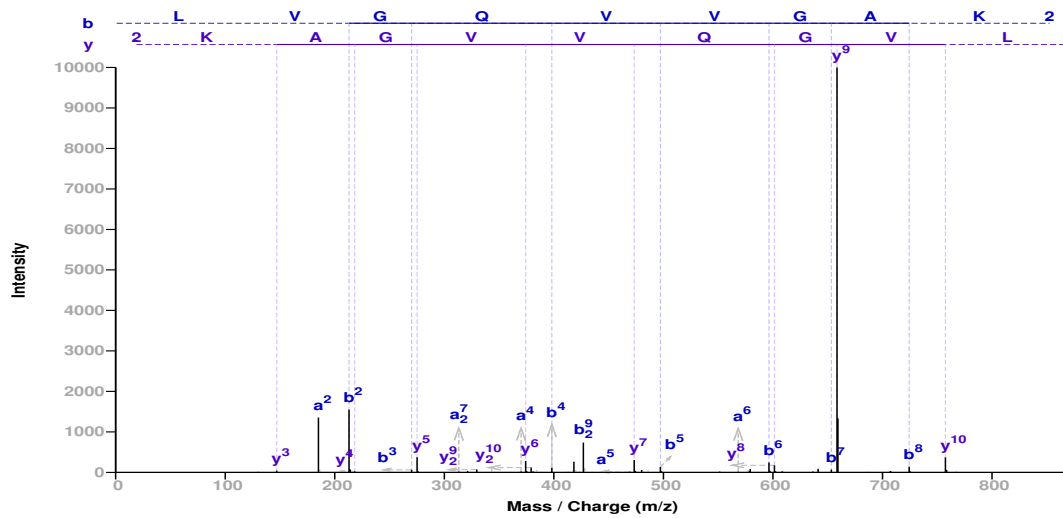

yeast01\_Scan\_Number\_6673 Precursor m/z: 596.388 cosine: 0.860  $\alpha$ : 0.629

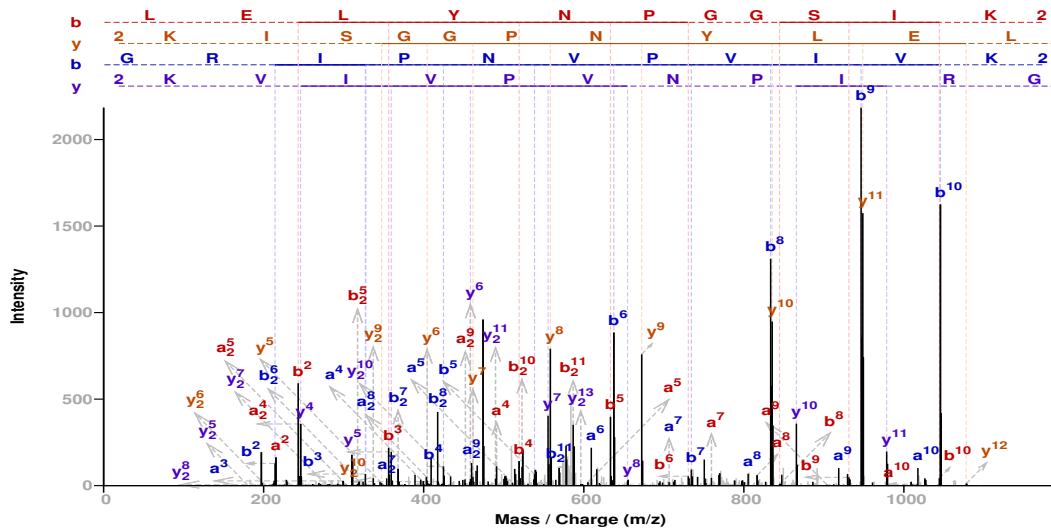

yeast01\_Scan\_Number\_4840 Precursor m/z: 633.833 cosine: 0.752  $\alpha$ : 0.627

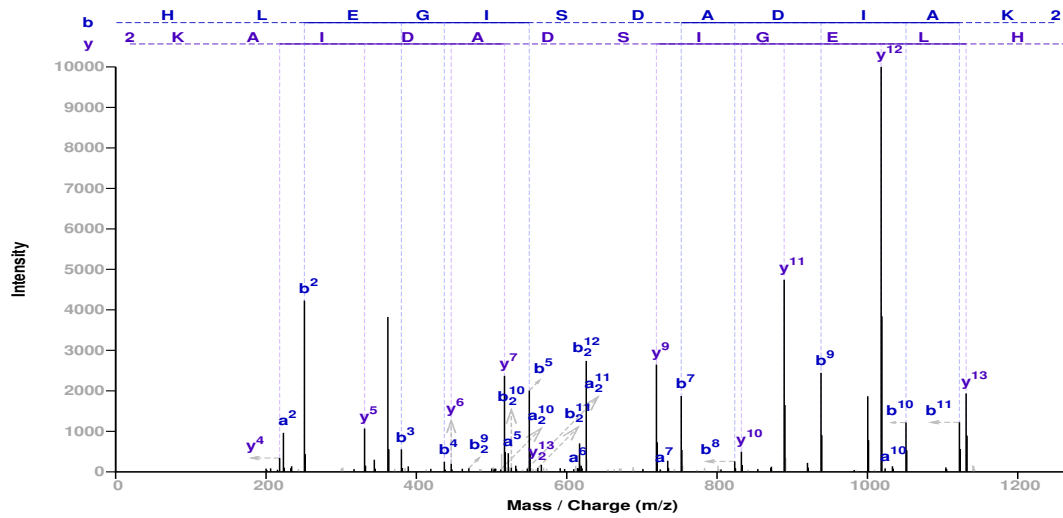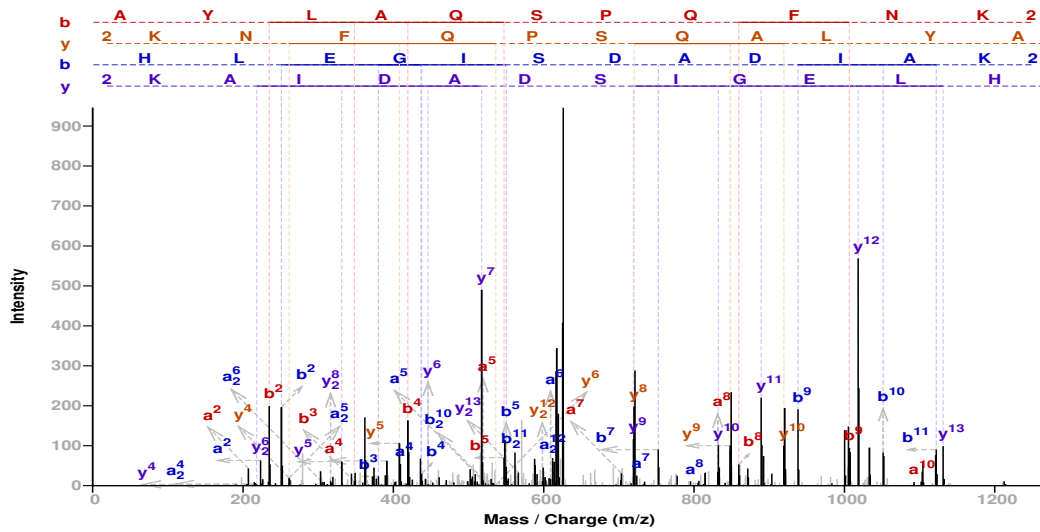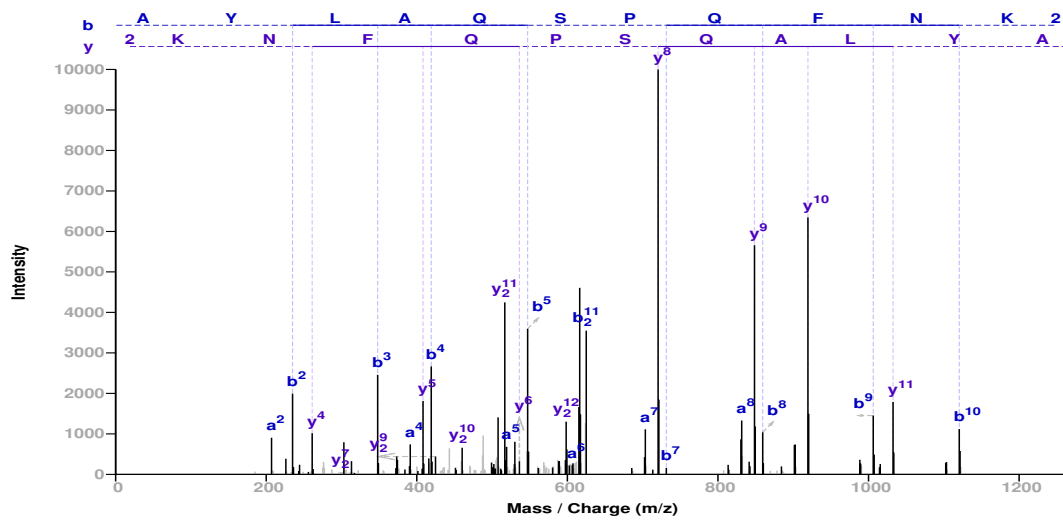

yeast01\_Scan\_Number\_5927 Precursor m/z: 680.343 cosine: 0.794  $\alpha$ : 0.619

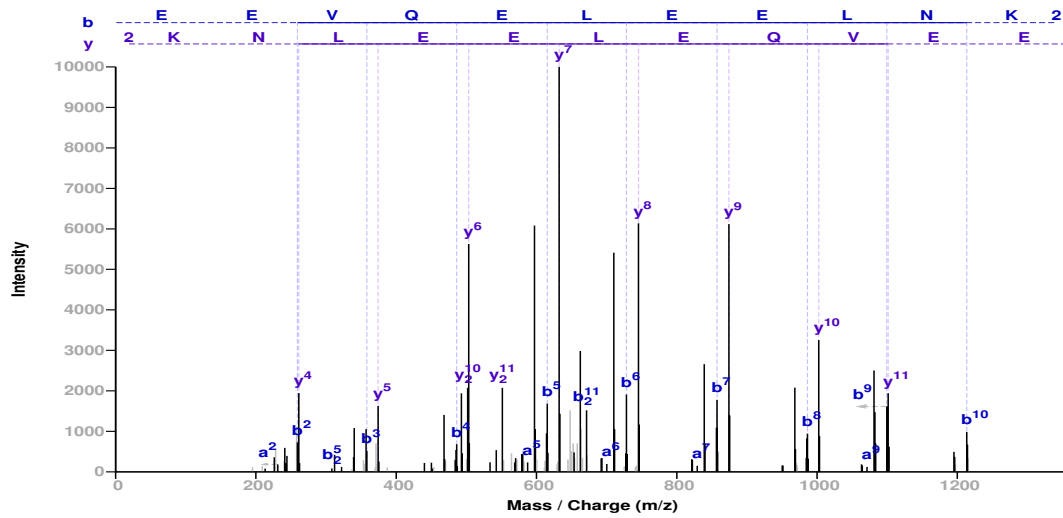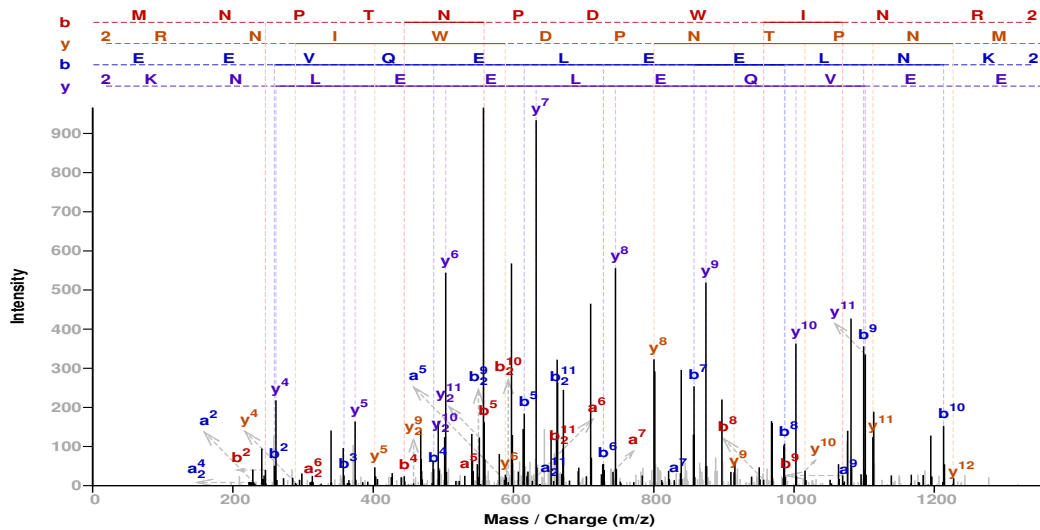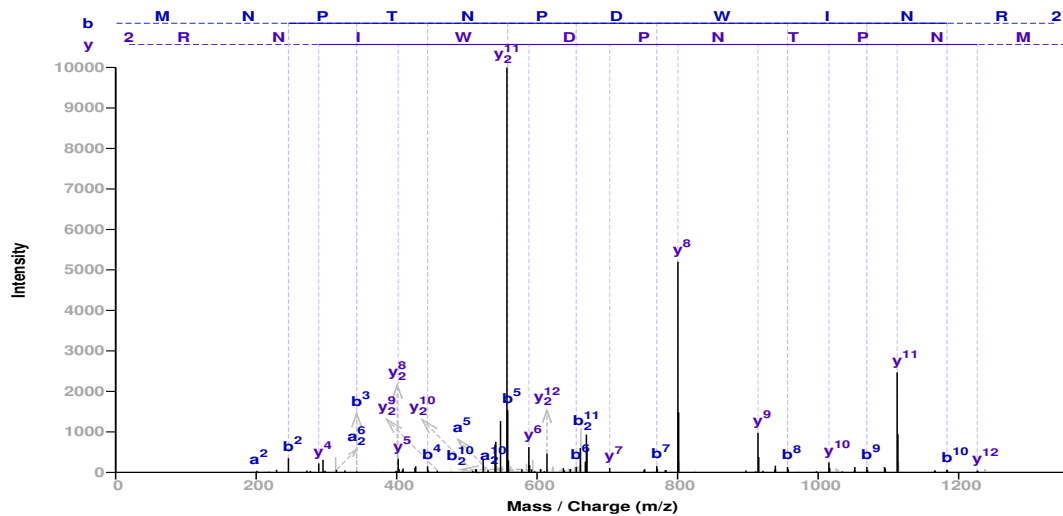

yeast01\_Scan\_Number\_6400 Precursor m/z: 509.776 cosine: 0.756  $\alpha$ : 0.618

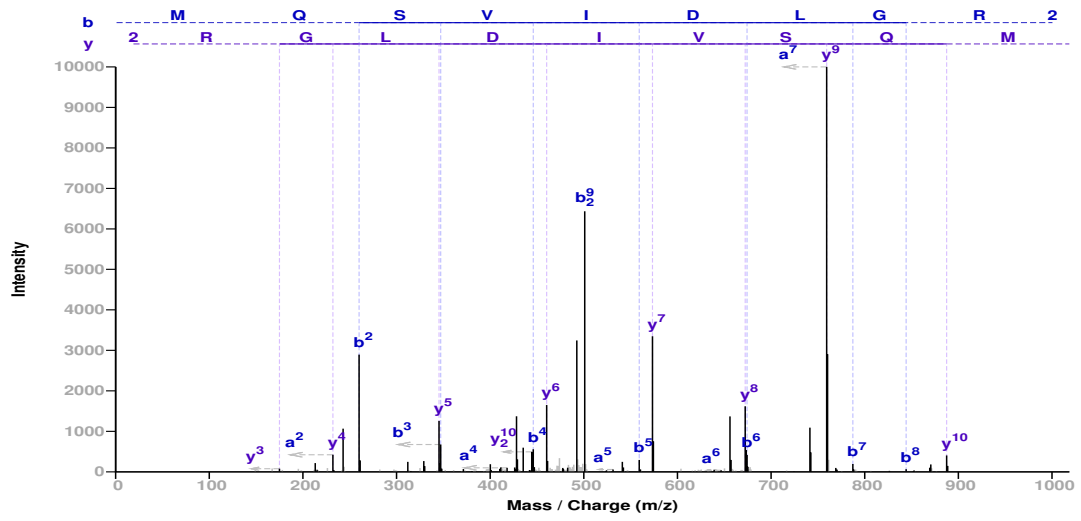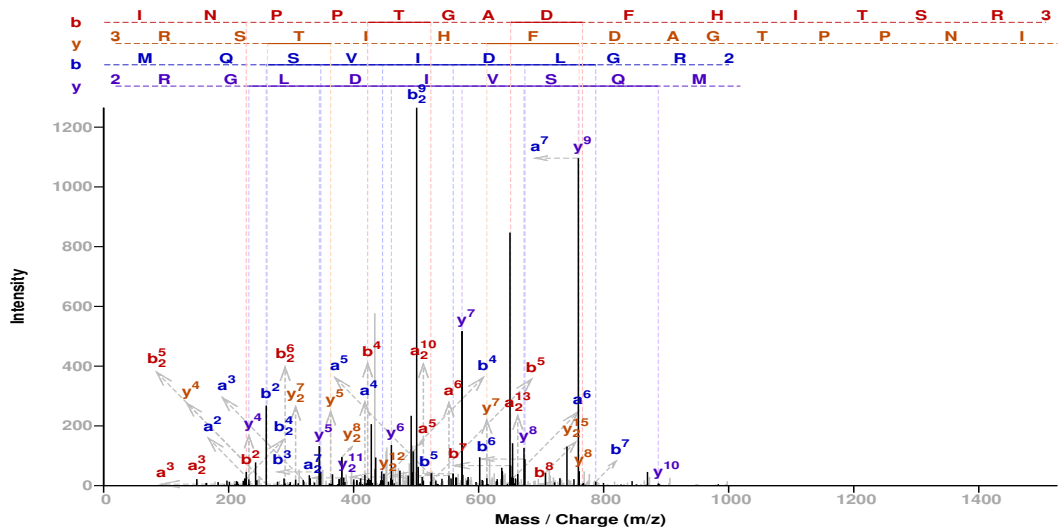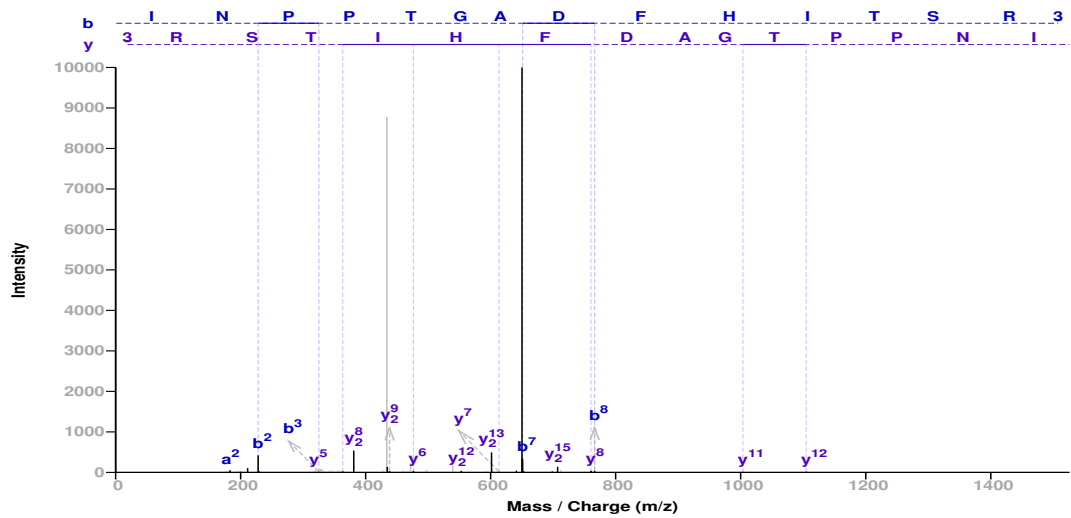

yeast01\_Scan\_Number\_5293 Precursor m/z: 478.272 cosine: 0.763  $\alpha$ : 0.610

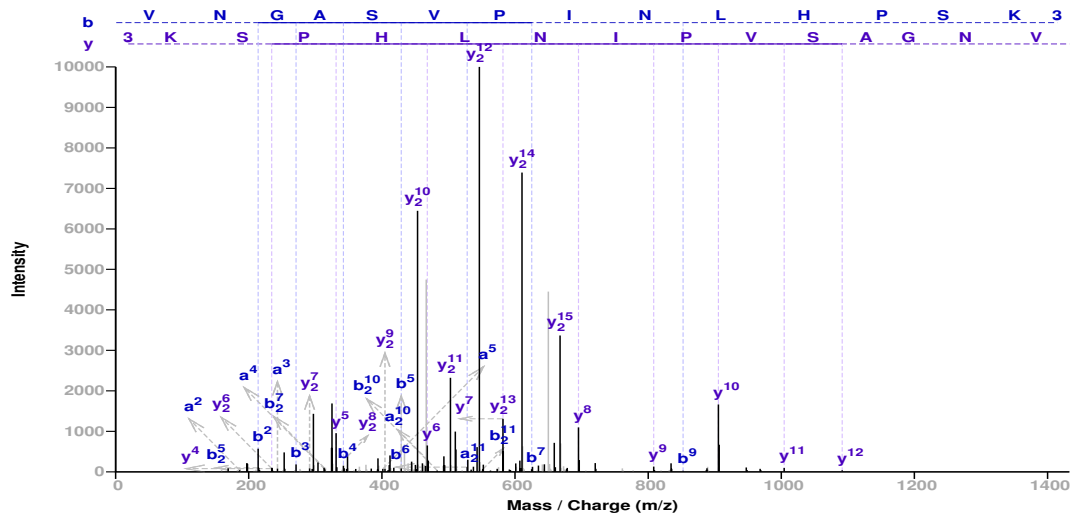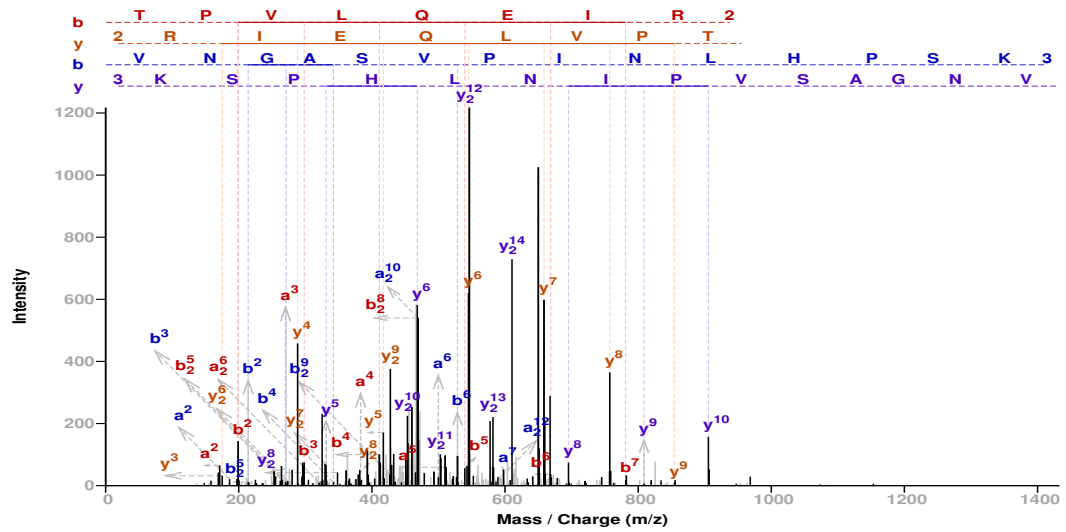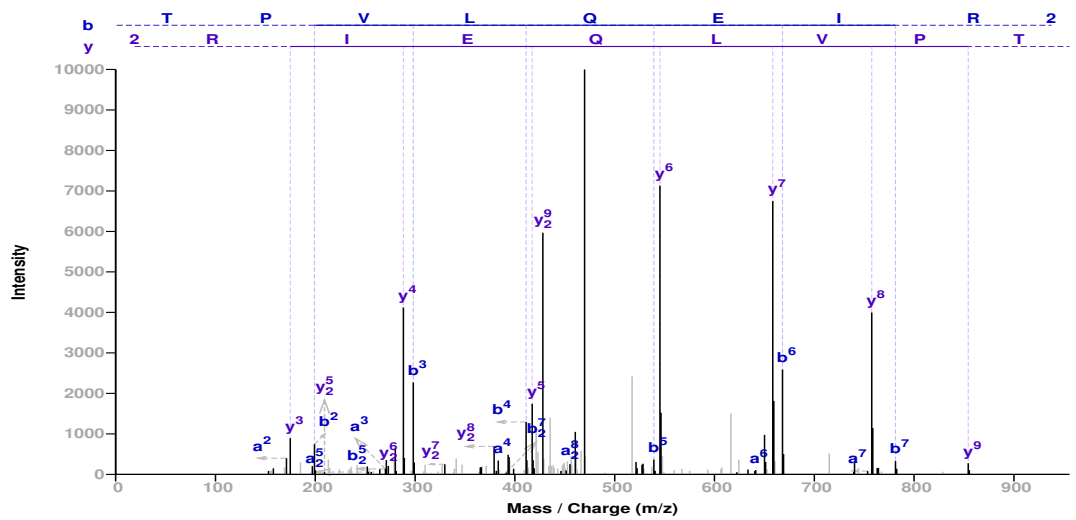



yeast01\_Scan\_Number\_2003 Precursor m/z: 447.233 cosine: 0.741  $\alpha$ : 0.606

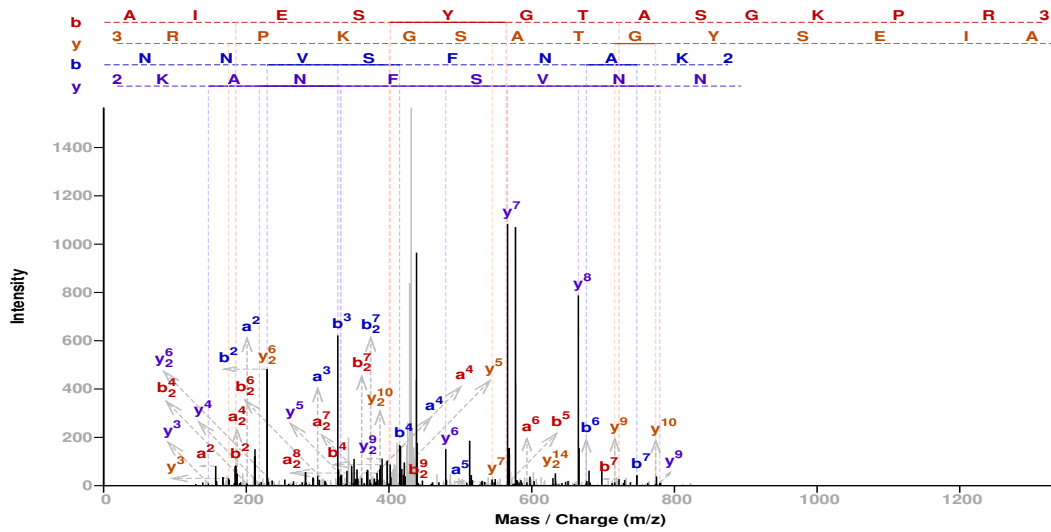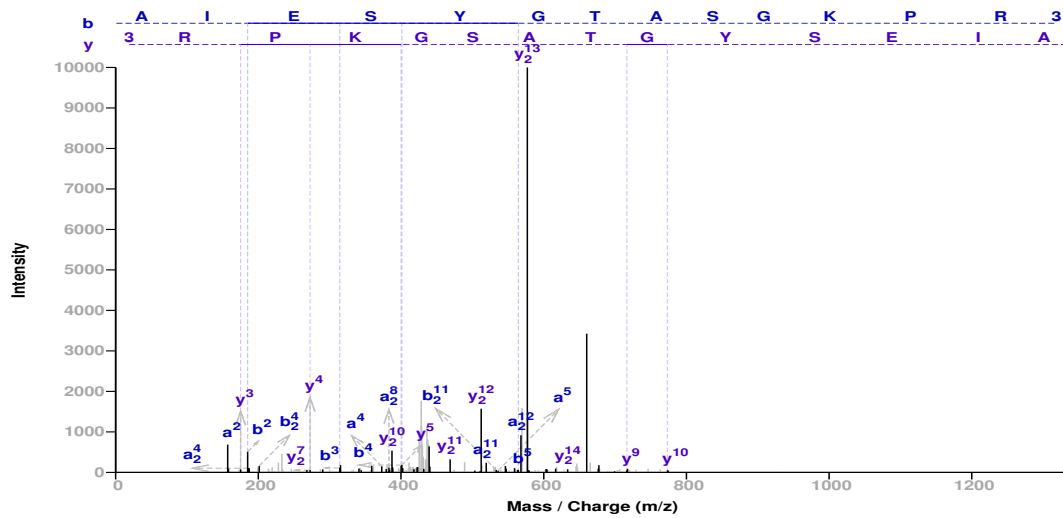

yeast01\_Scan\_Number\_4322 Precursor m/z: 450.269 cosine: 0.732  $\alpha$ : 0.604

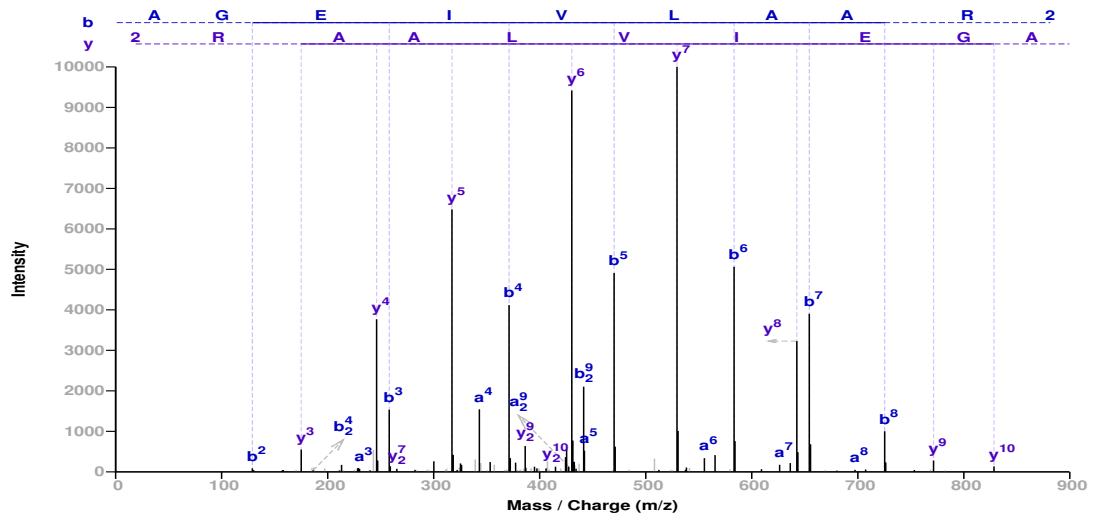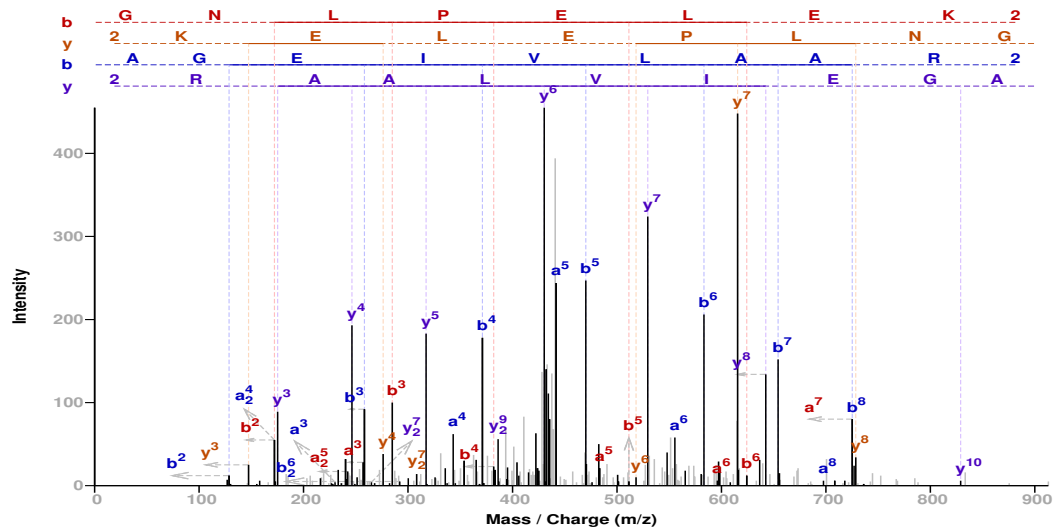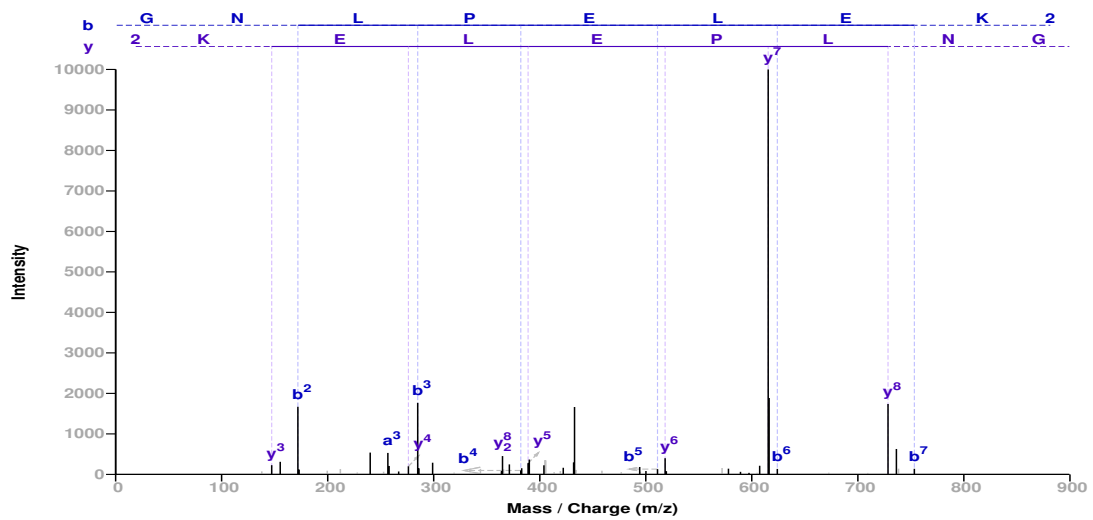

yeast01\_Scan\_Number\_9005 Precursor m/z: 516.294 cosine: 0.761  $\alpha$ : 0.601

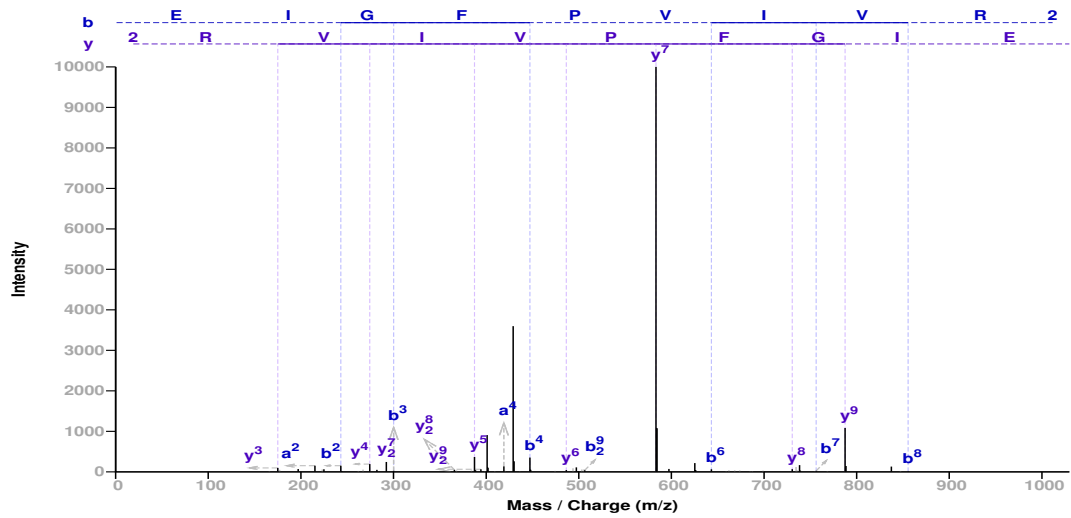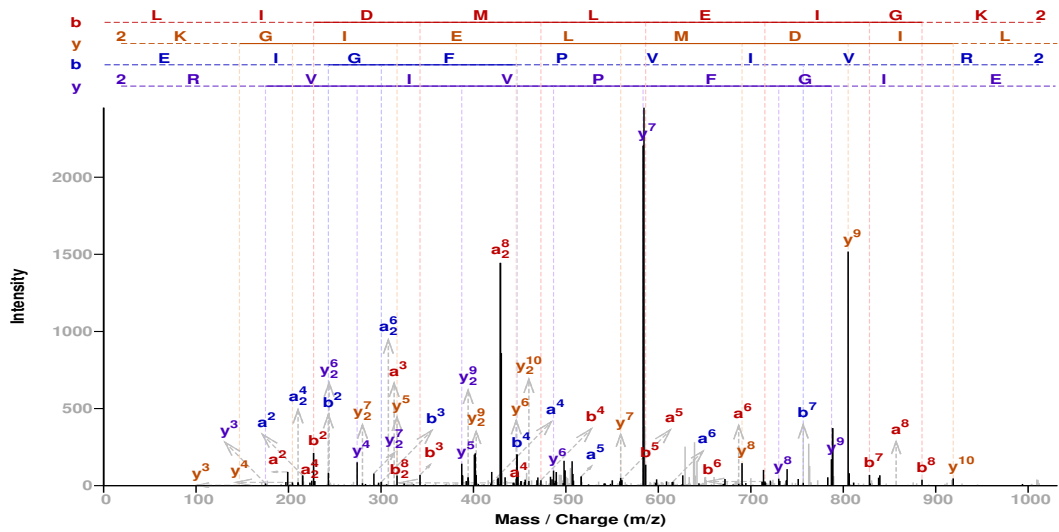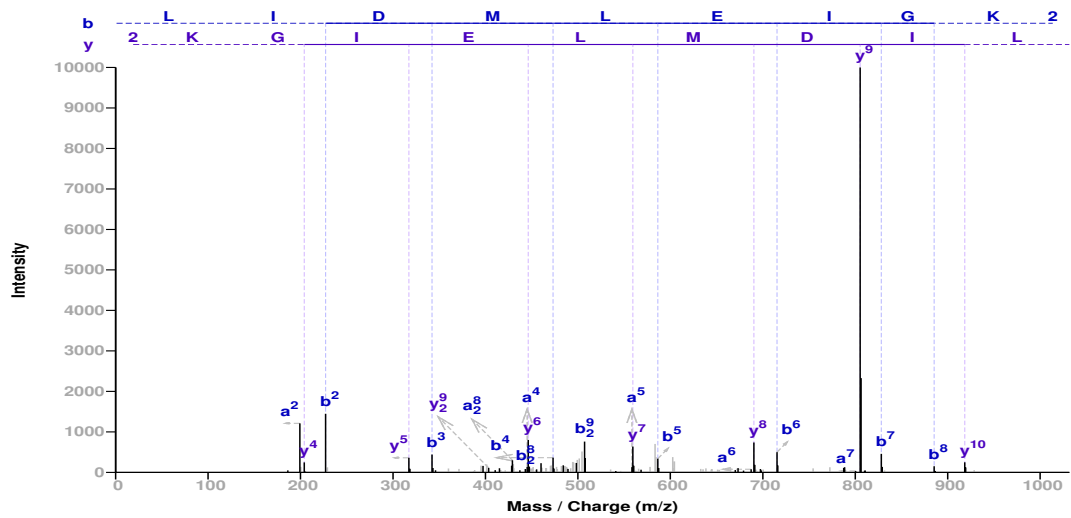

yeast01\_Scan\_Number\_1827 Precursor m/z: 622.827 cosine: 0.771  $\alpha$ : 0.600

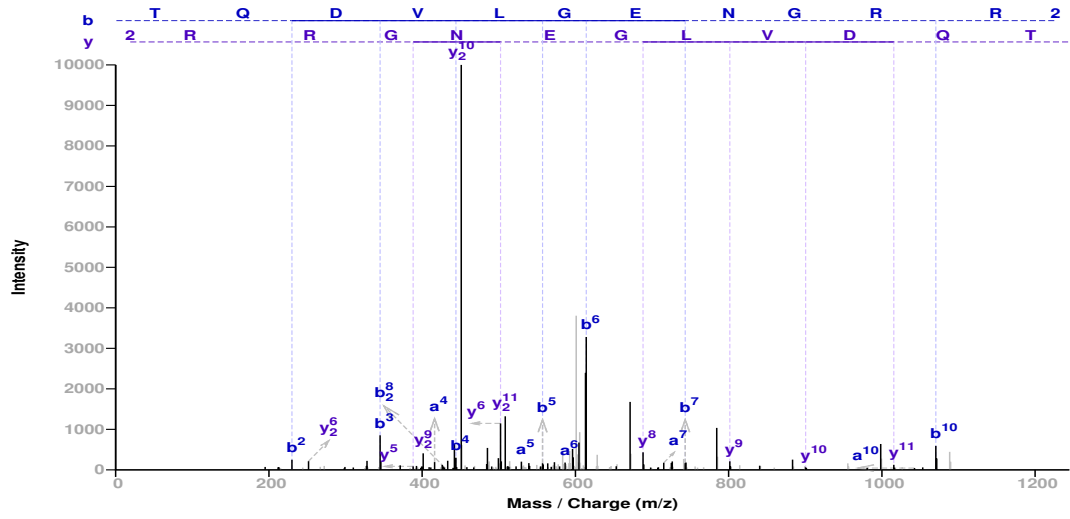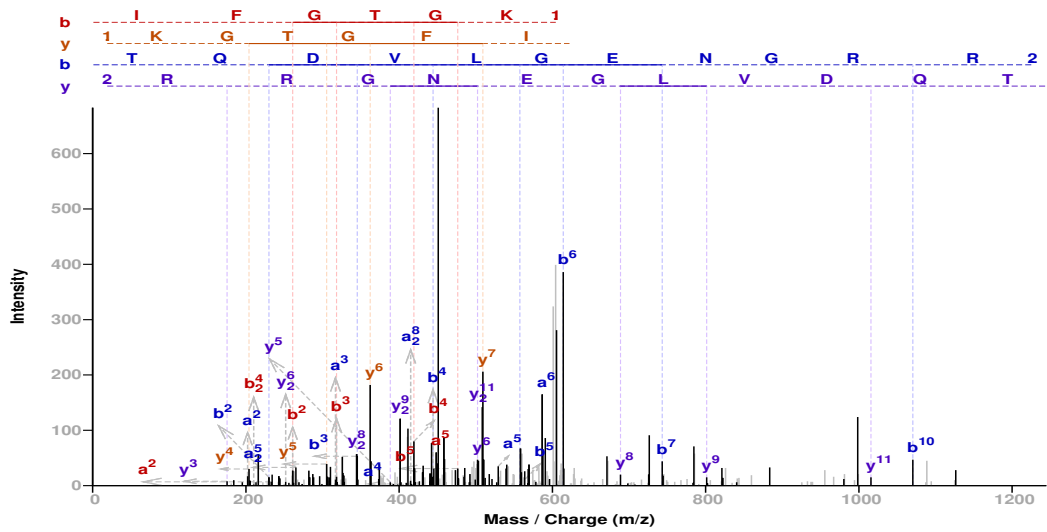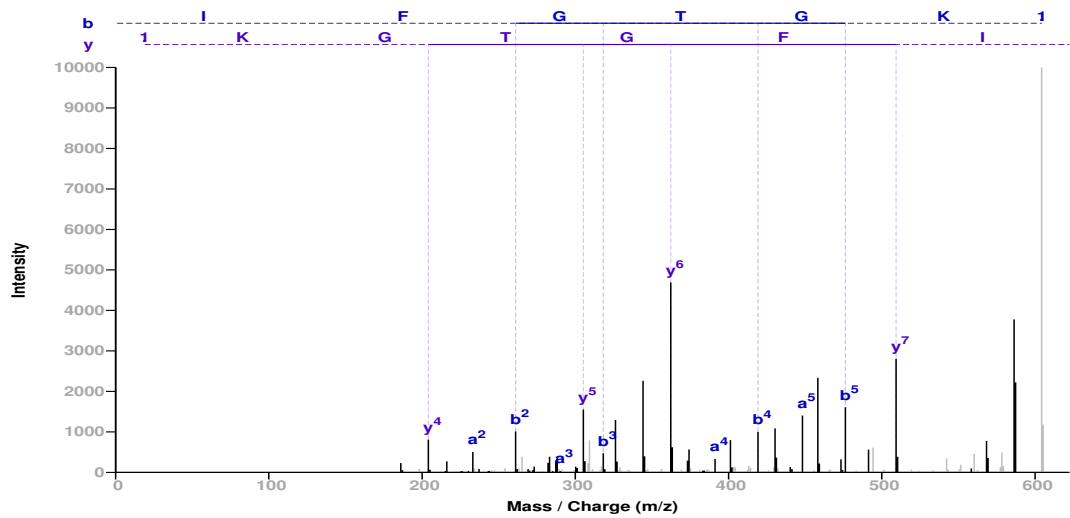

yeast01\_Scan\_Number\_5084 Precursor m/z: 611.972 cosine: 0.801  $\alpha$ : 0.591

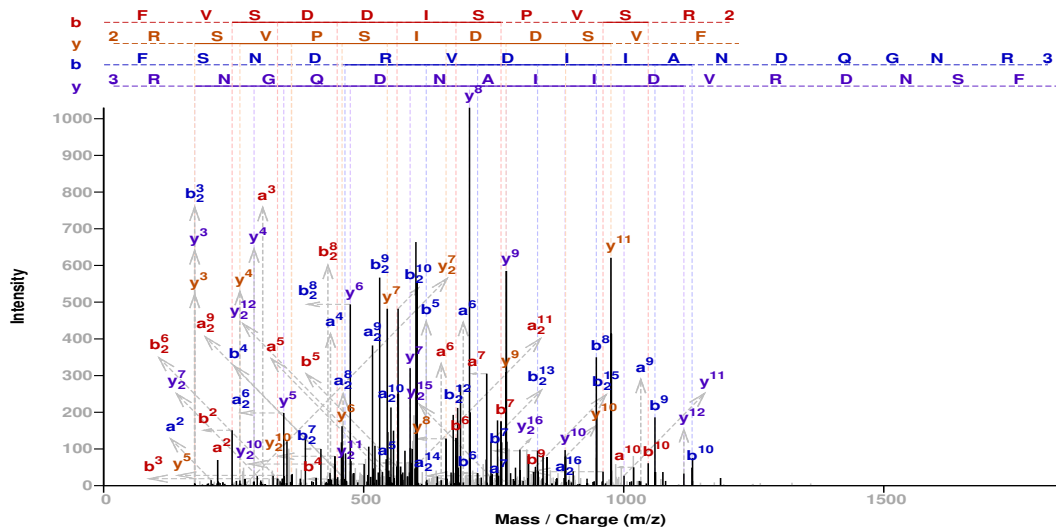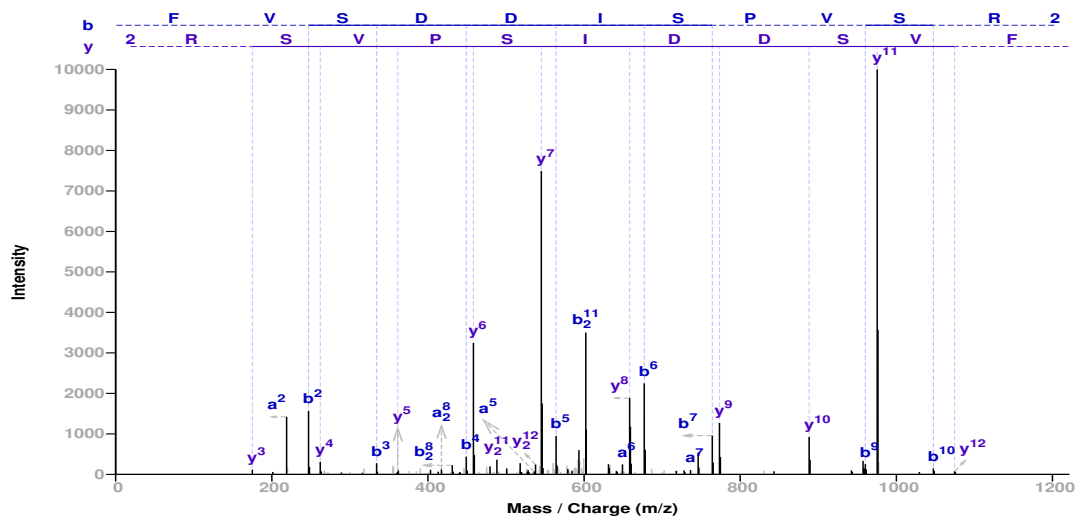

yeast01\_Scan\_Number\_6313 Precursor m/z: 409.248 cosine: 0.727  $\alpha$ : 0.589

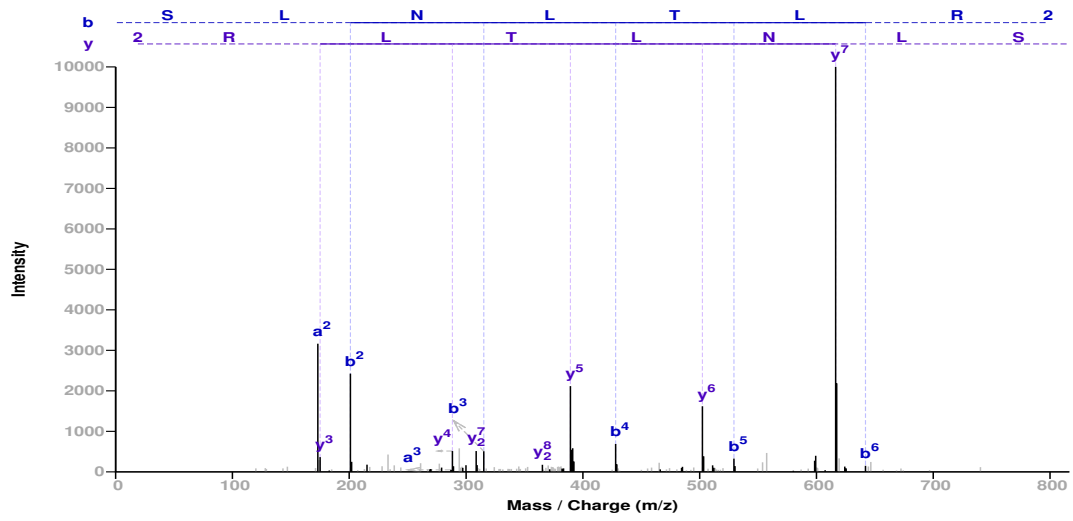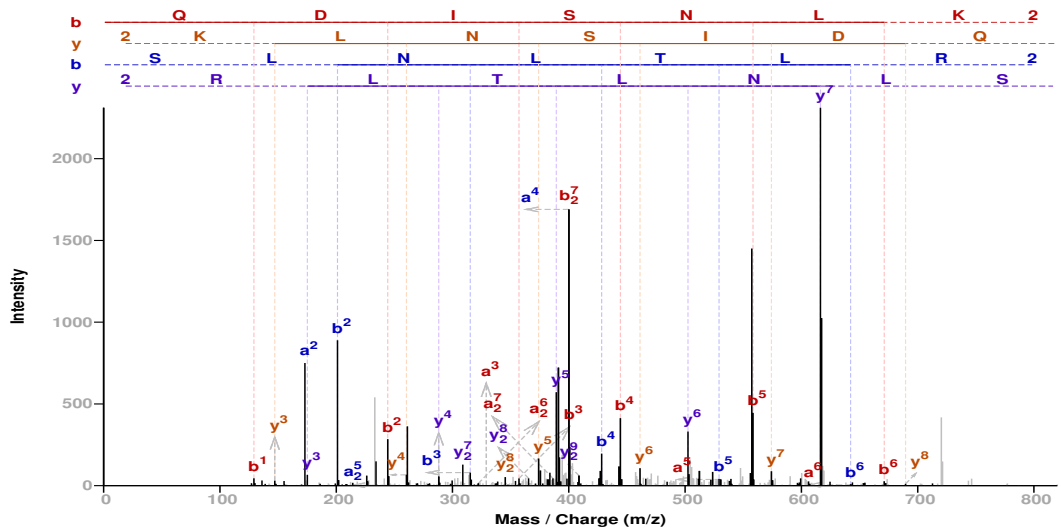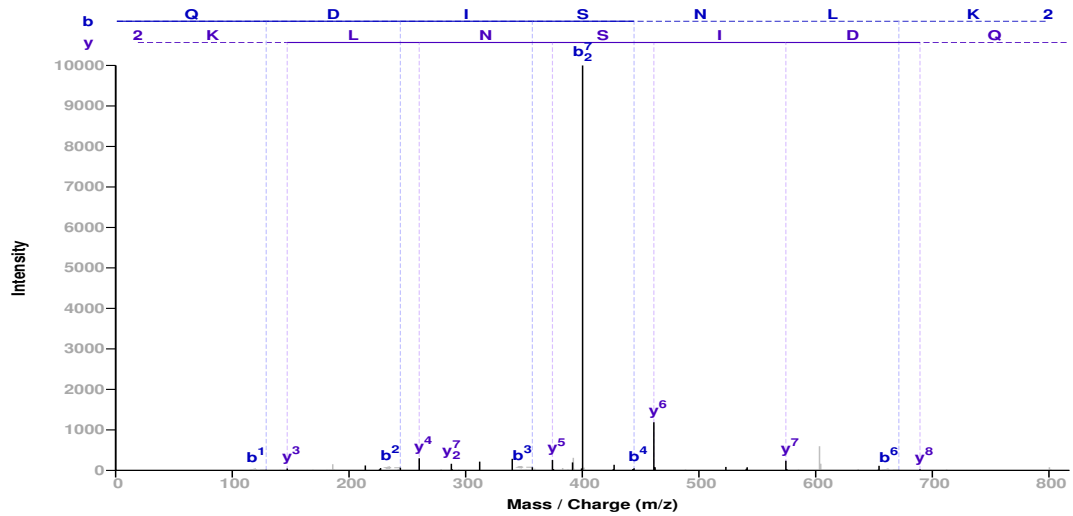



yeast01\_Scan\_Number\_5368 Precursor m/z: 538.305 cosine: 0.769  $\alpha$ : 0.576

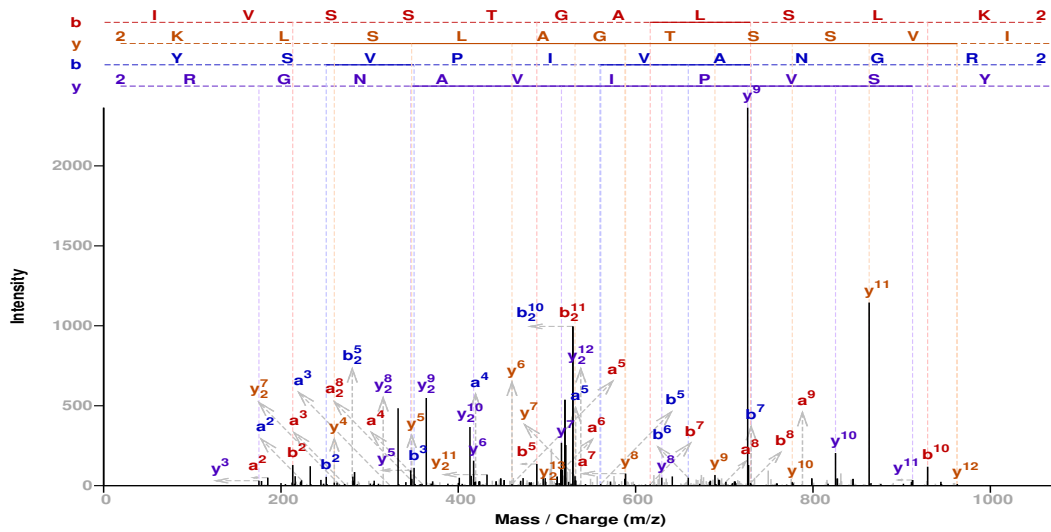



yeast01.Scan\_Number\_3555 Precursor m/z: 380.512 cosine: 0.750  $\alpha$ : 0.576

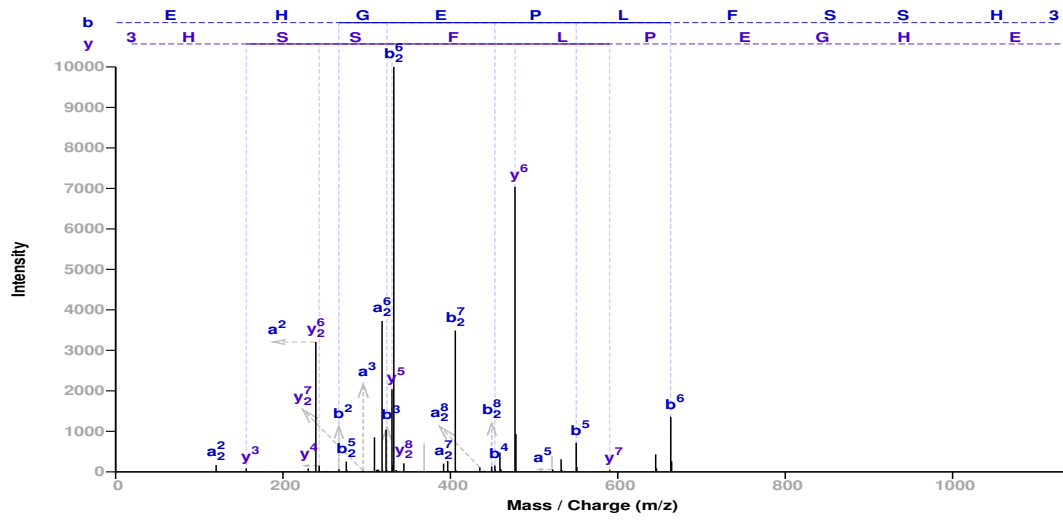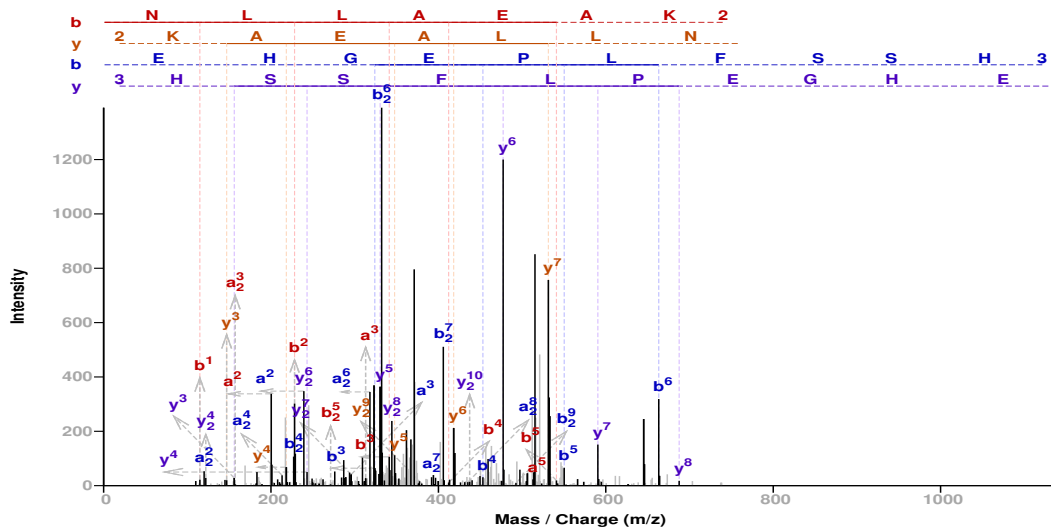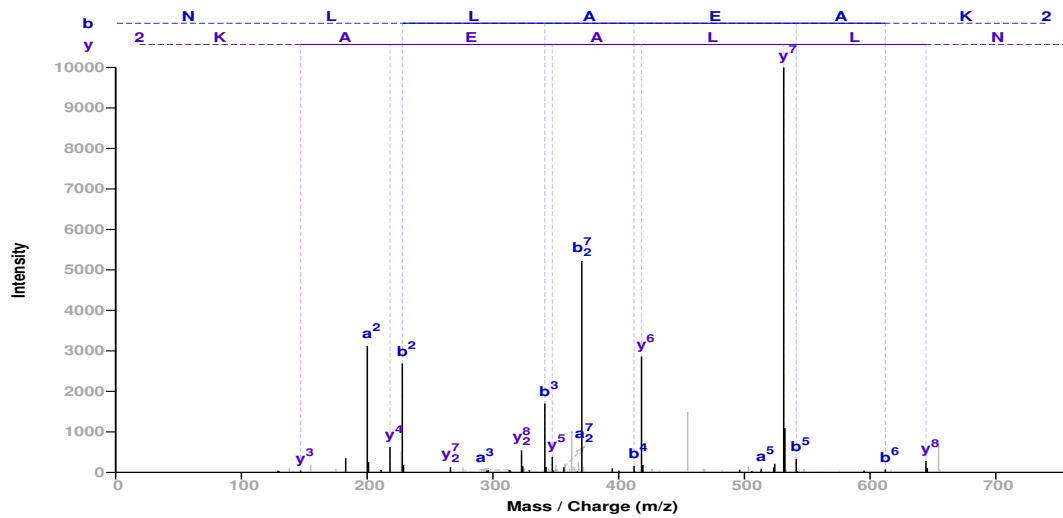

yeast01\_Scan\_Number\_2526 Precursor m/z: 625.840 cosine: 0.809  $\alpha$ : 0.565

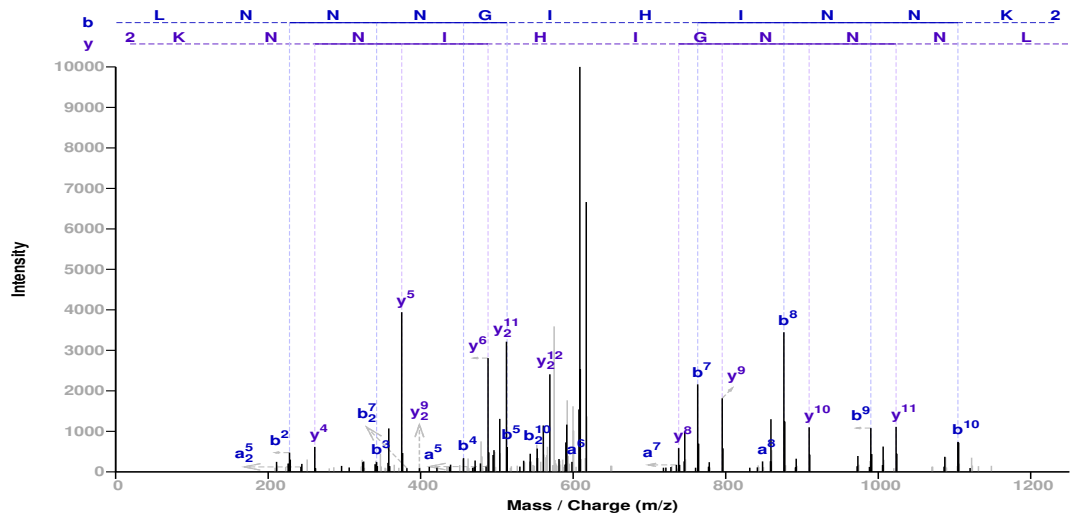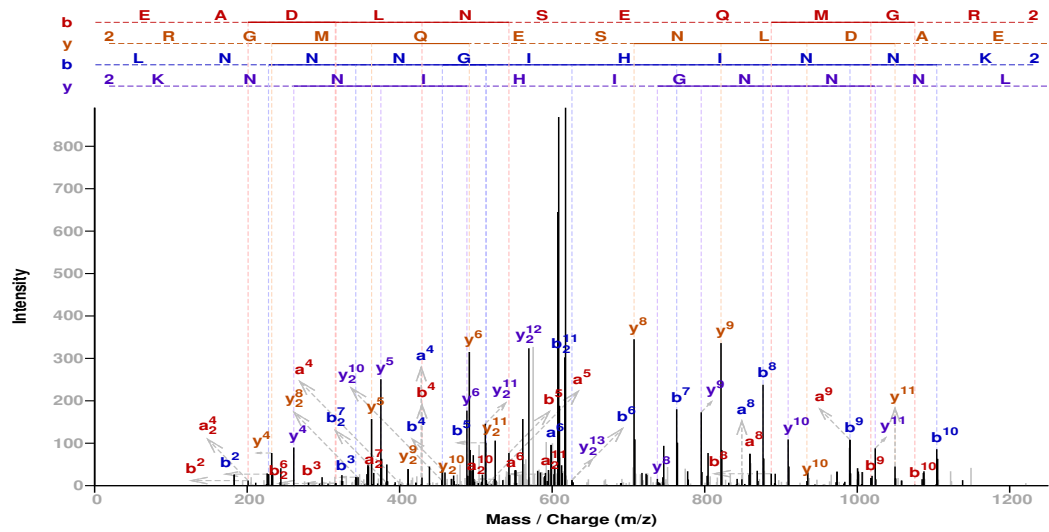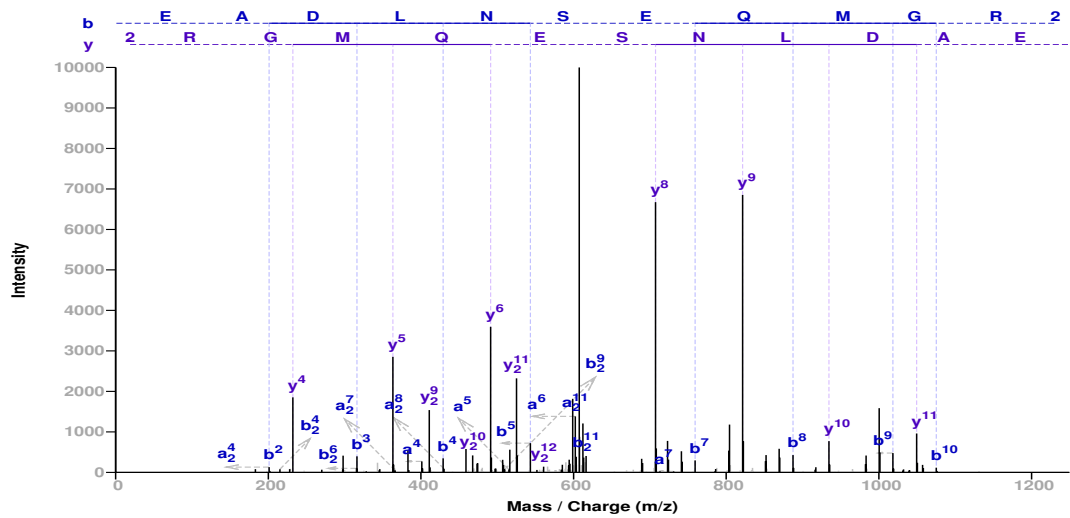

yeast01\_Scan\_Number\_4841 Precursor m/z: 757.419 cosine: 0.753  $\alpha$ : 0.561

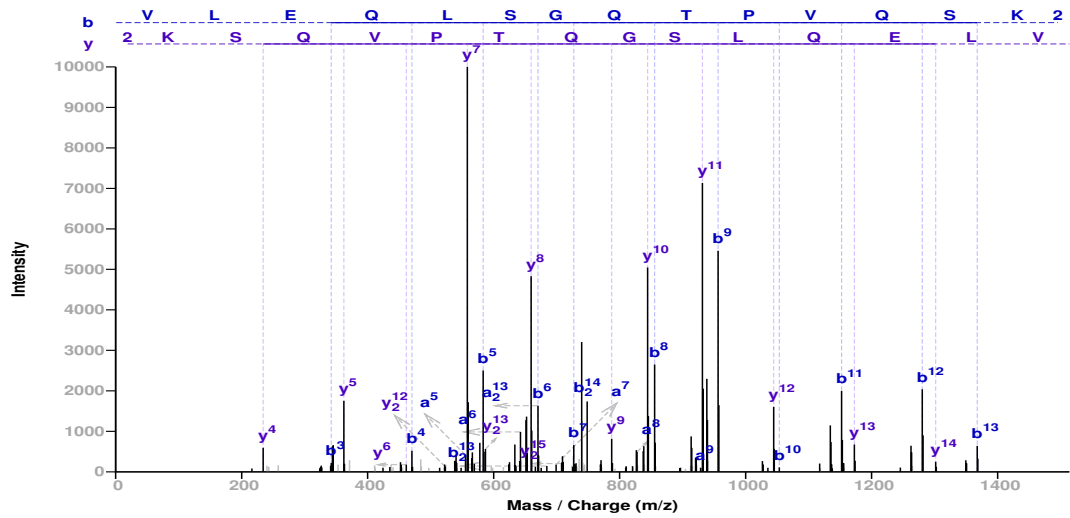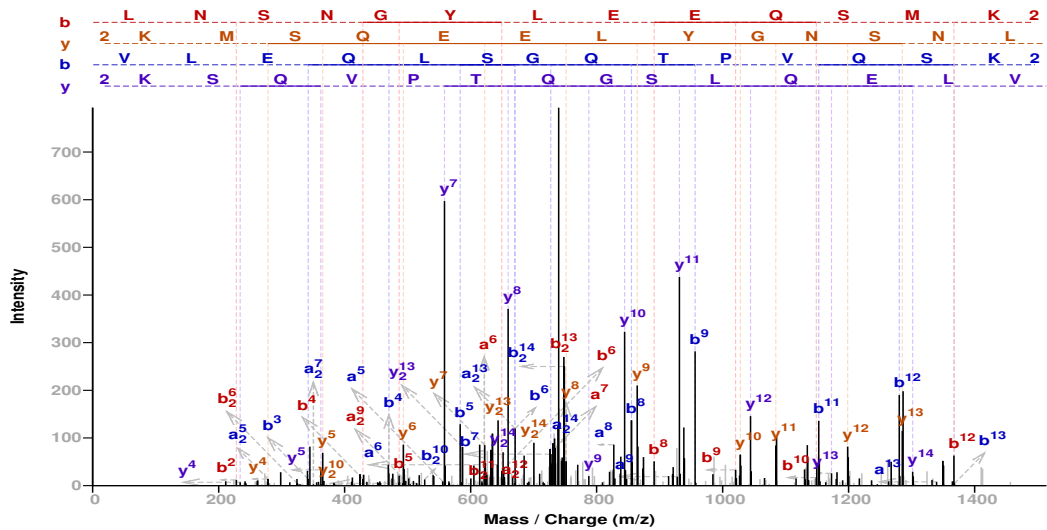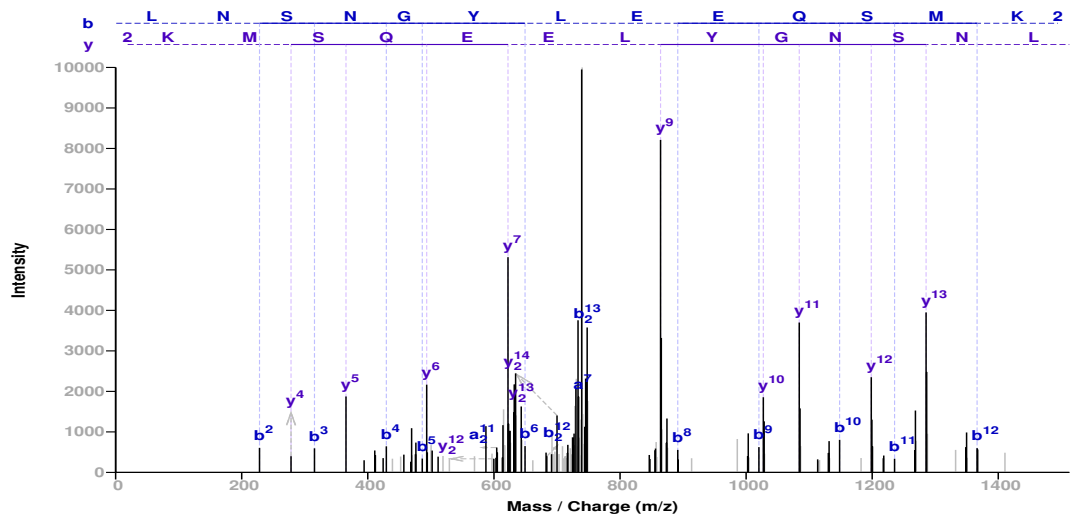

yeast01\_Scan\_Number\_1682 Precursor m/z: 487.786 cosine: 0.887  $\alpha$ : 0.556

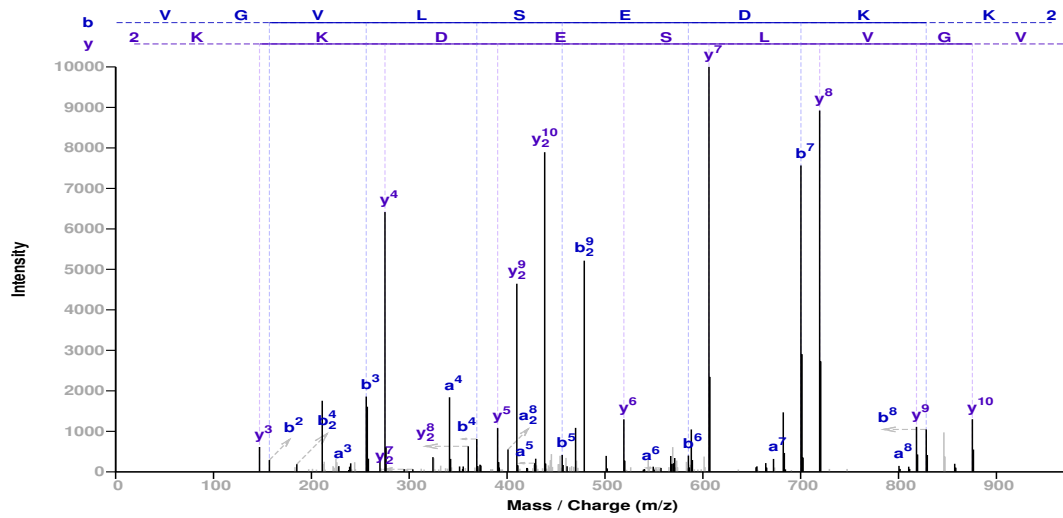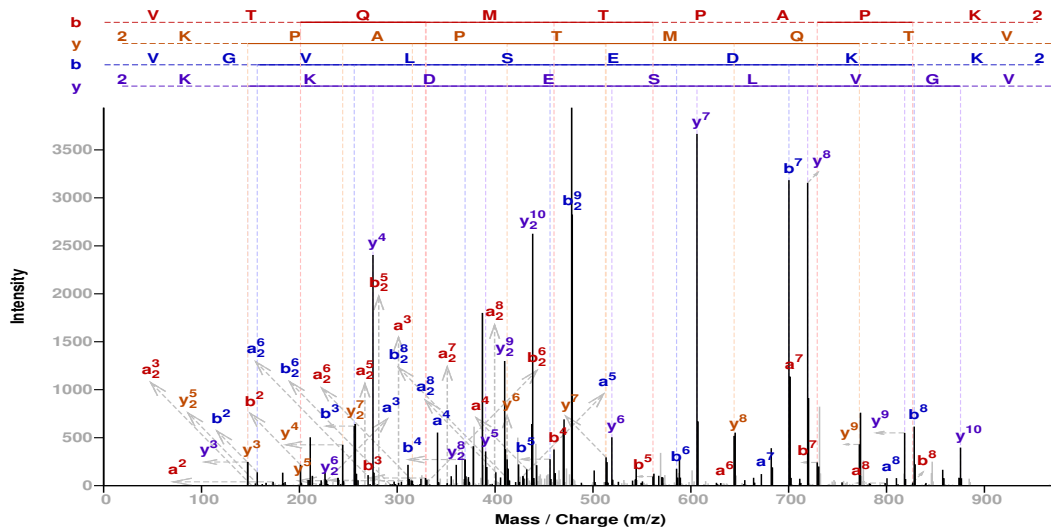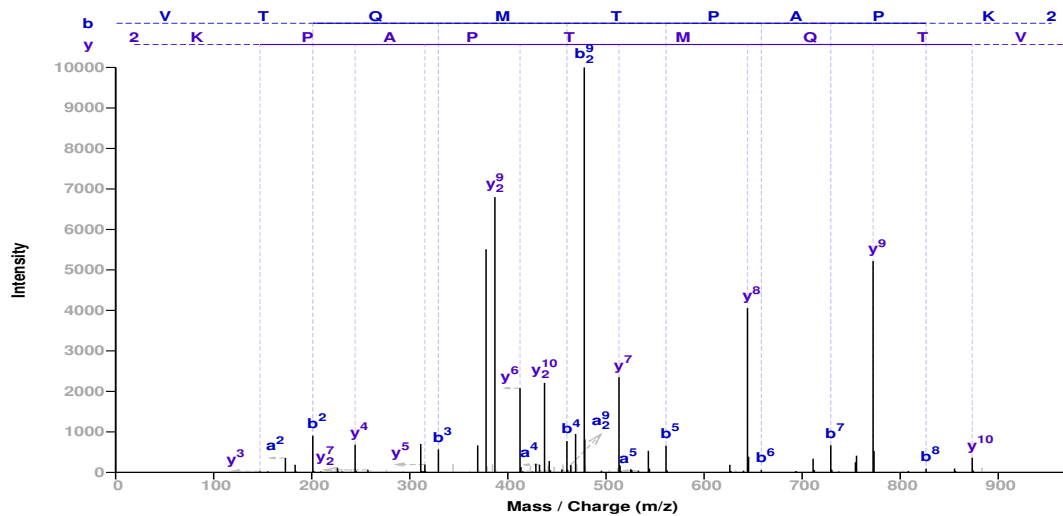

yeast01\_Scan\_Number\_5081 Precursor m/z: 643.826 cosine: 0.826  $\alpha$ : 0.550

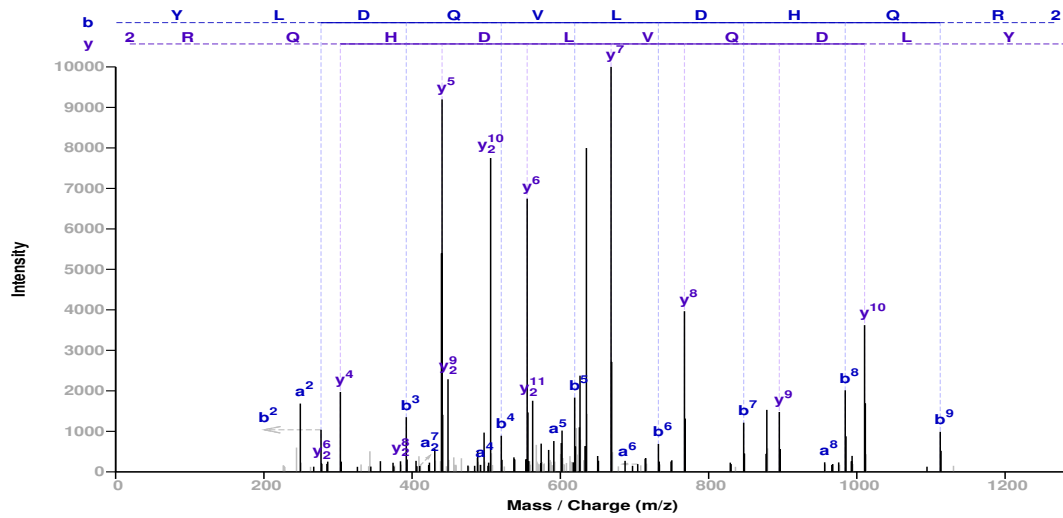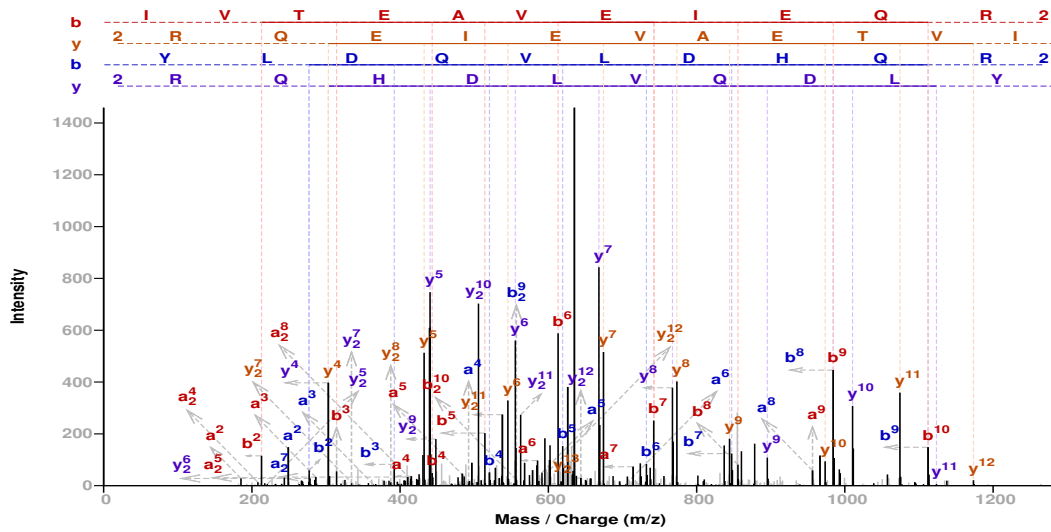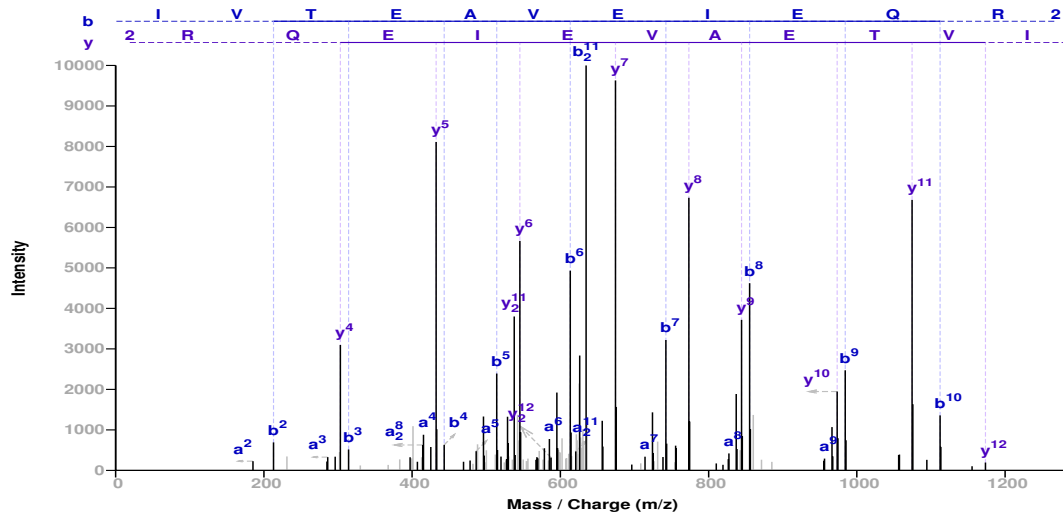

yeast01\_Scan\_Number\_4342 Precursor m/z: 473.291 cosine: 0.864  $\alpha$ : 0.548

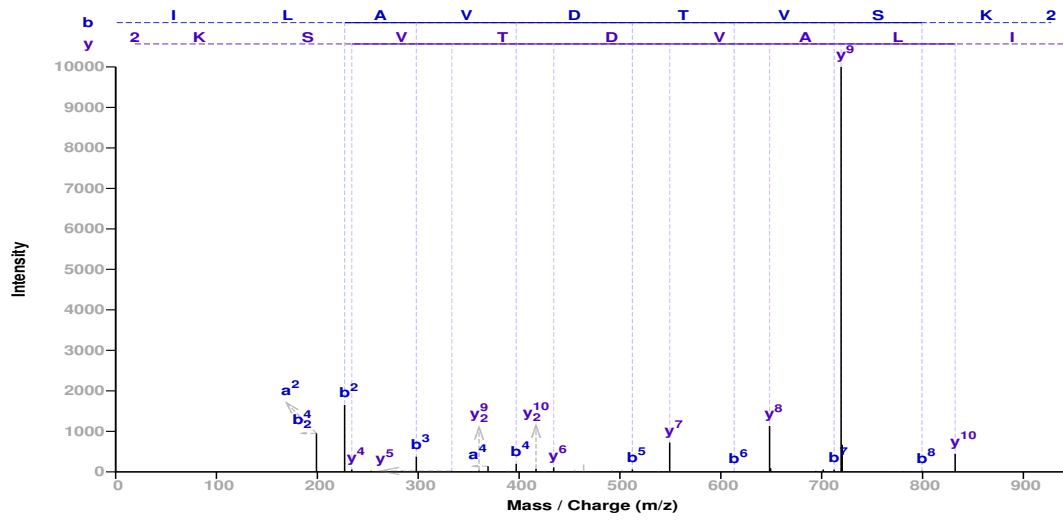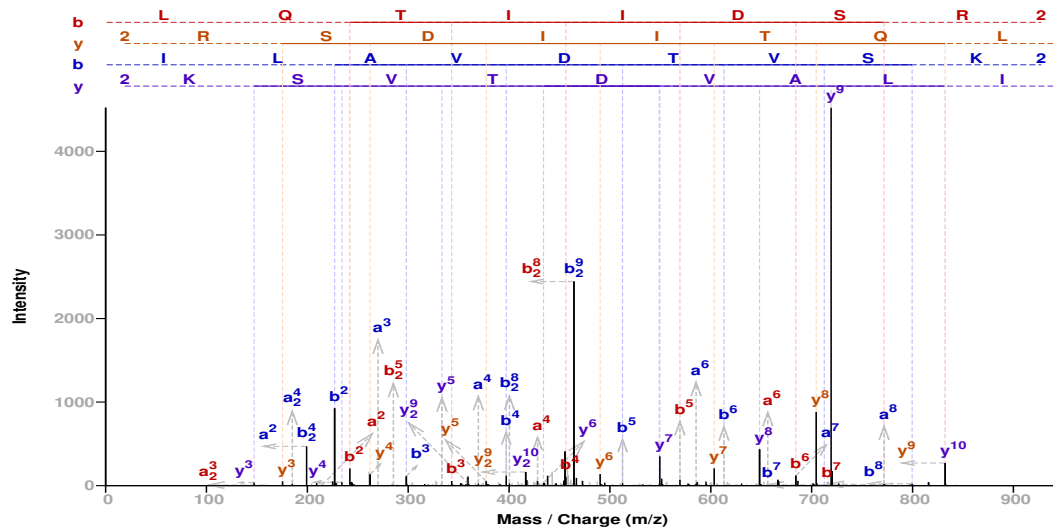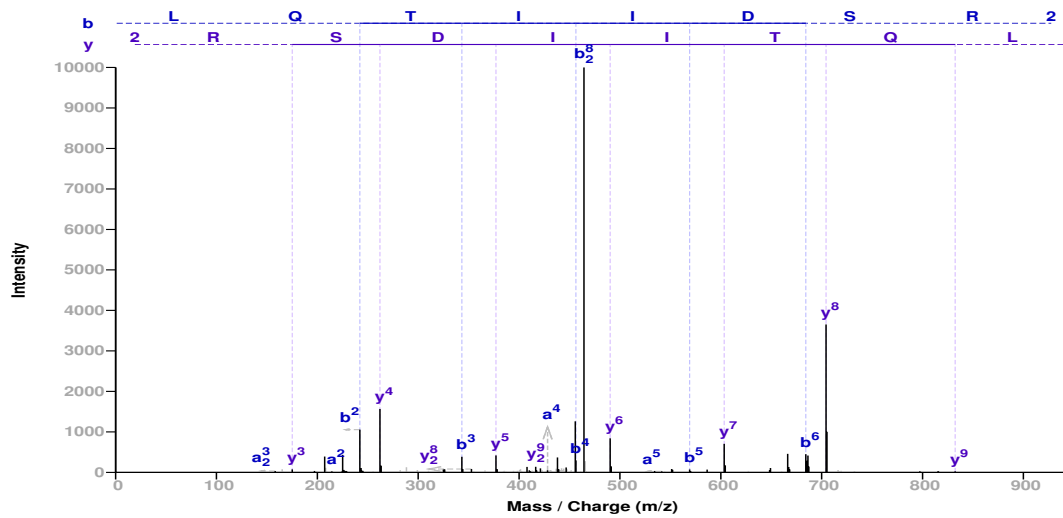

yeast01\_Scan\_Number\_3190 Precursor m/z: 560.793 cosine: 0.743  $\alpha$ : 0.540

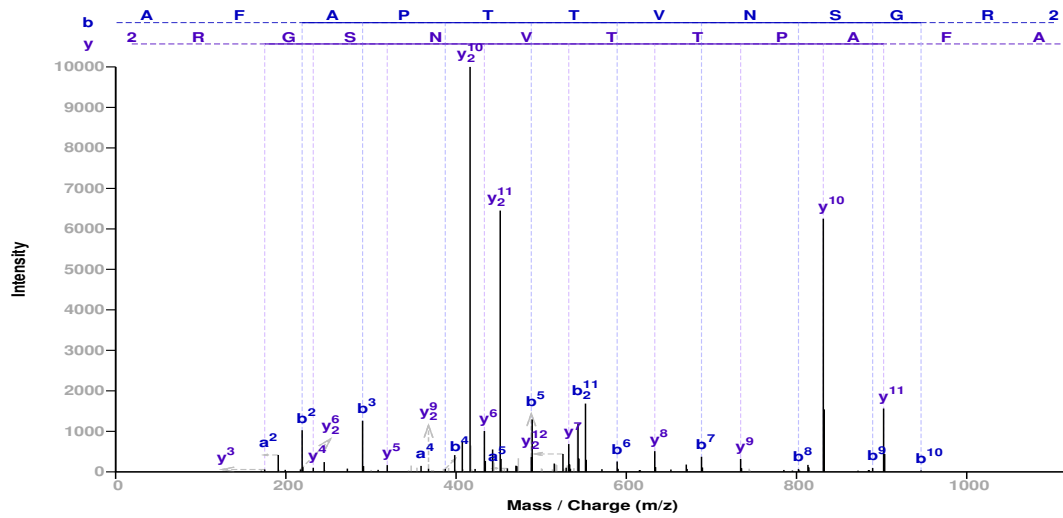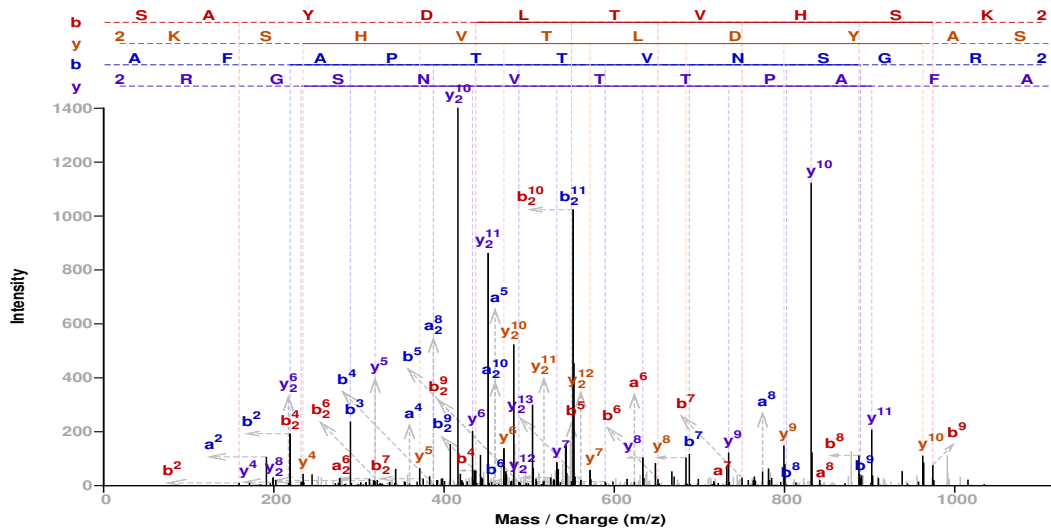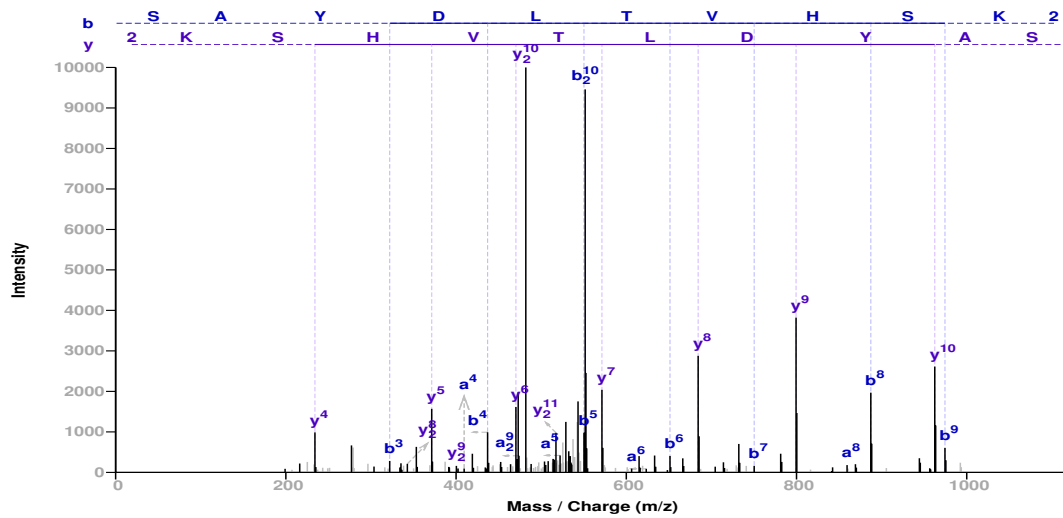

yeast01\_Scan\_Number\_3093 Precursor m/z: 408.754 cosine: 0.846  $\alpha$ : 0.534

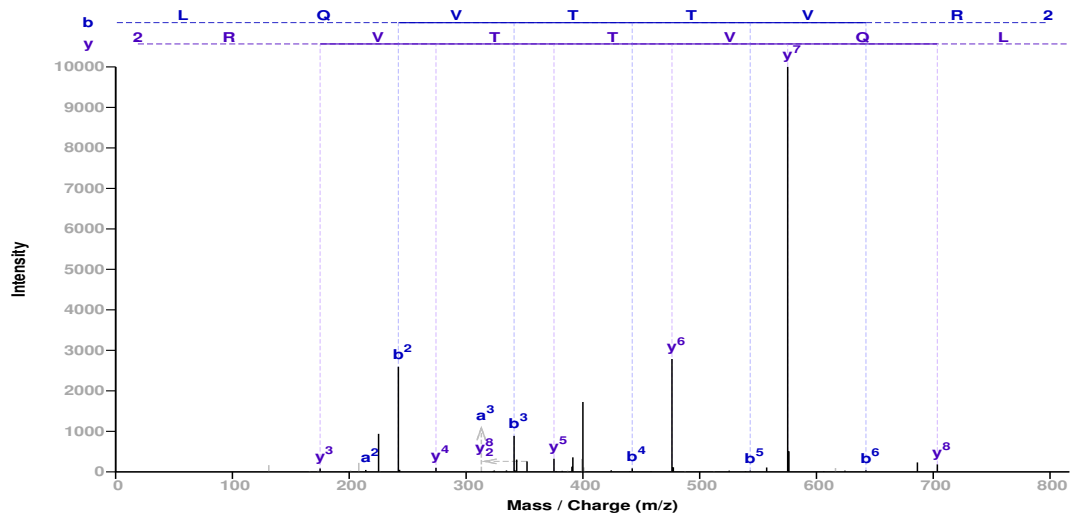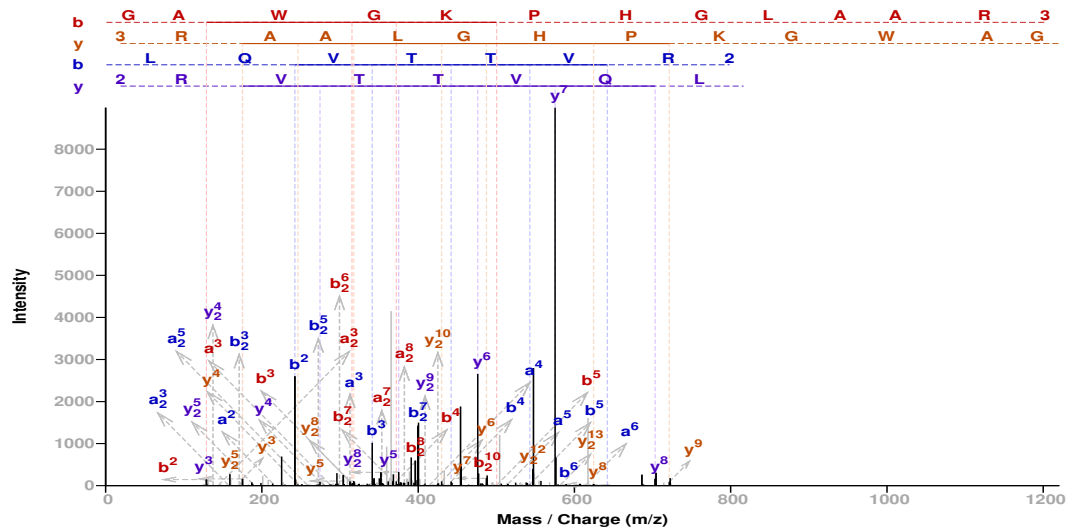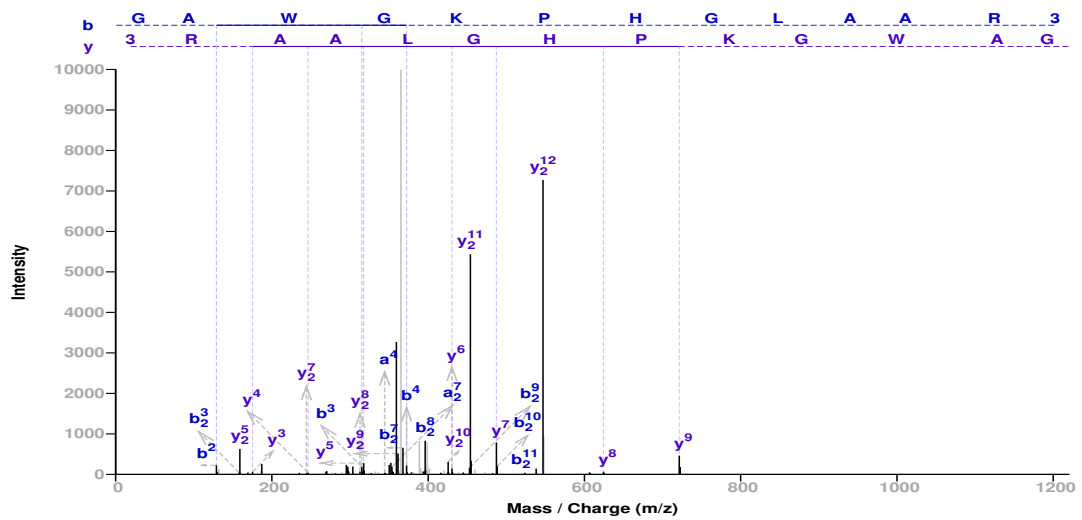



yeast01\_Scan\_Number\_7211 Precursor m/z: 657.861 cosine: 0.752  $\alpha$ : 0.531

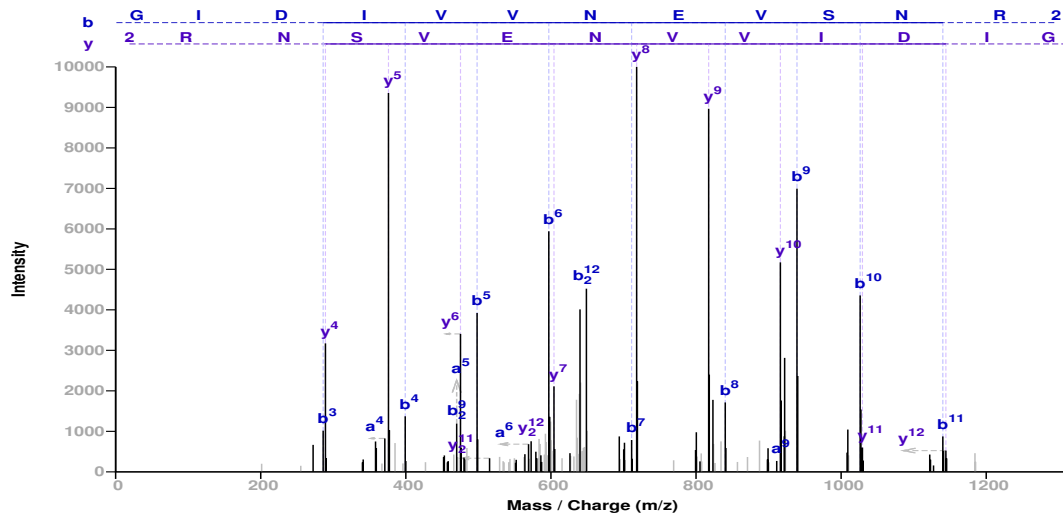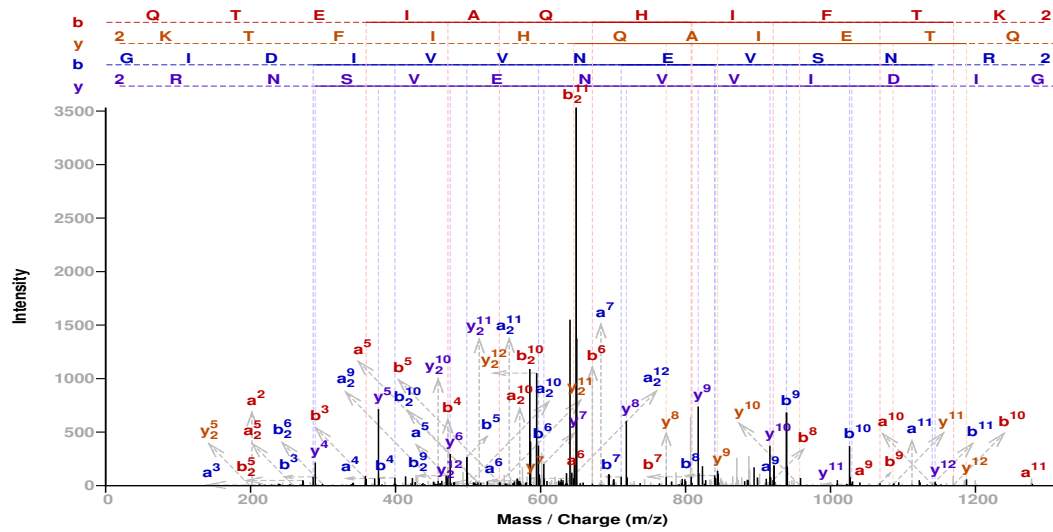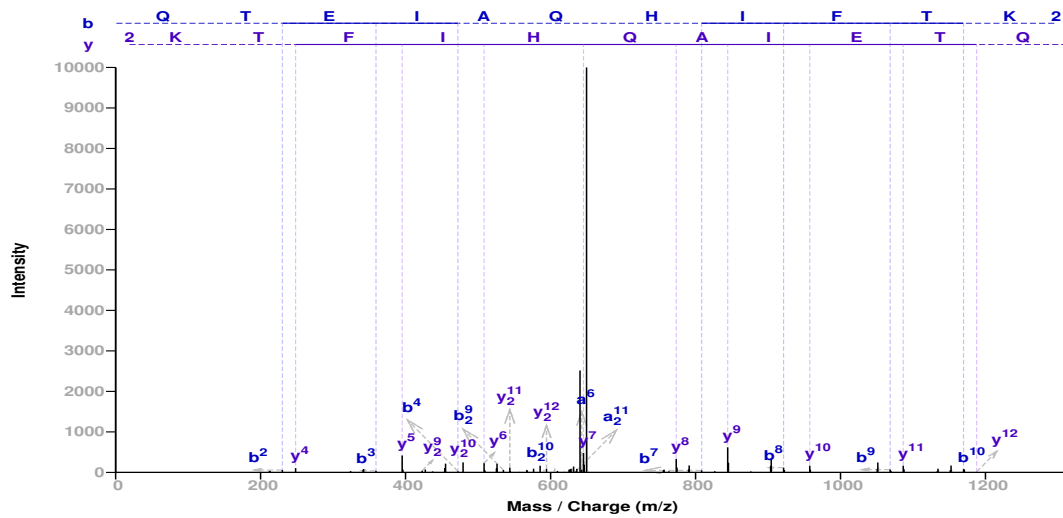

yeast01\_Scan\_Number\_8862 Precursor m/z: 551.791 cosine: 0.747  $\alpha$ : 0.530

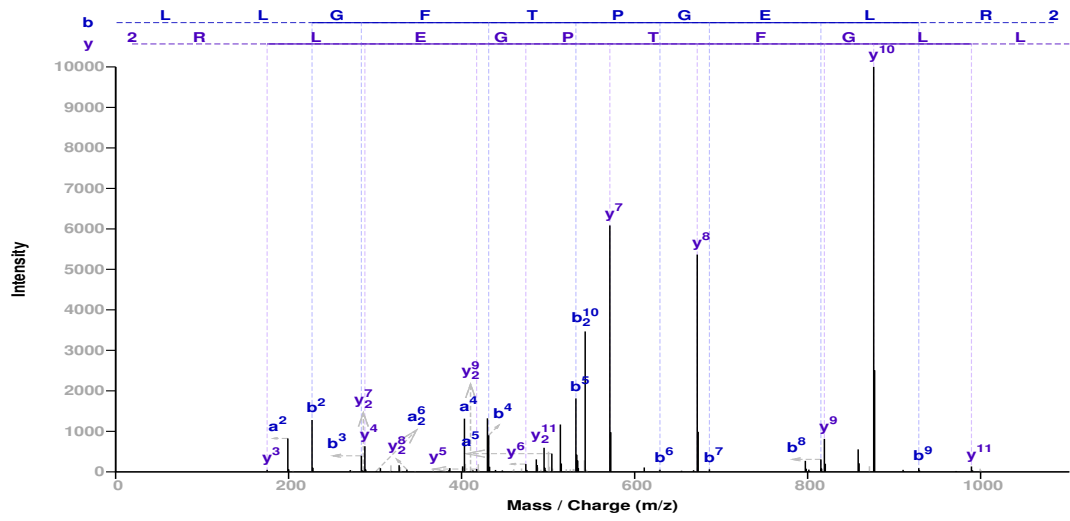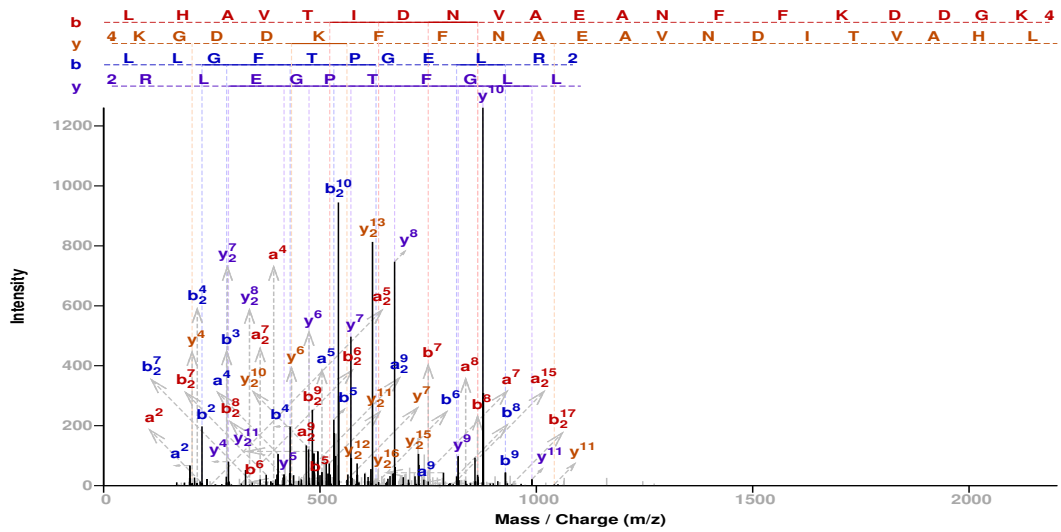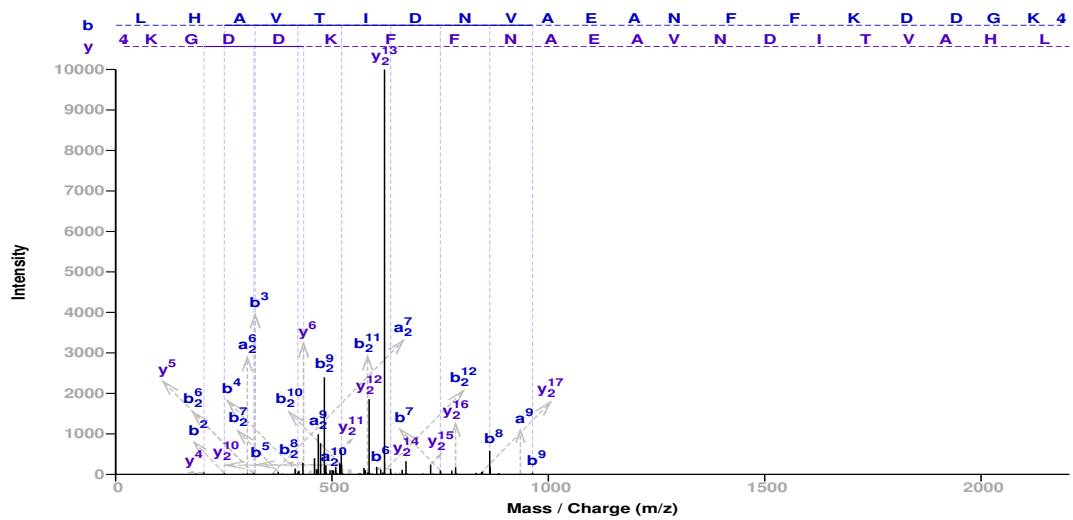

yeast01\_Scan\_Number\_10178 Precursor m/z: 640.898 cosine: 0.772  $\alpha$ : 0.521

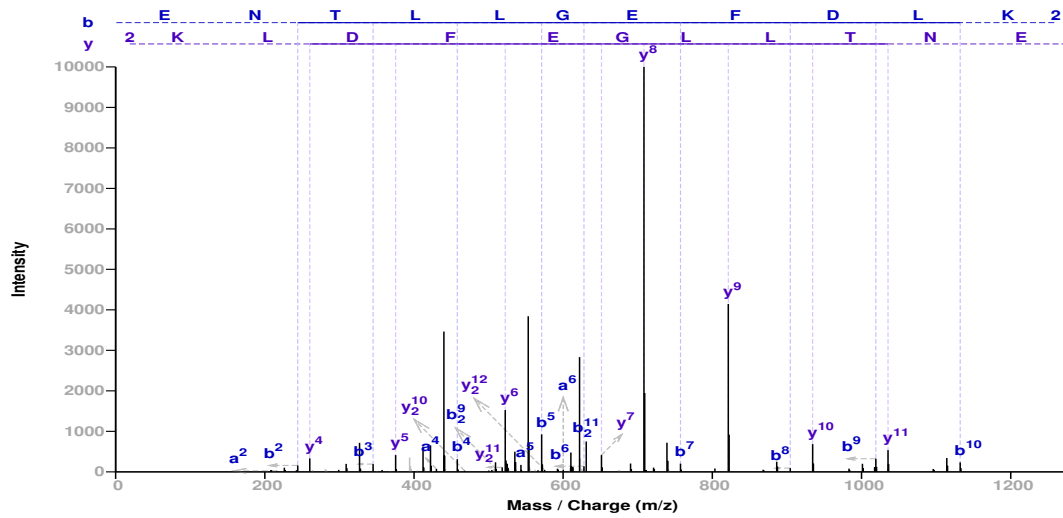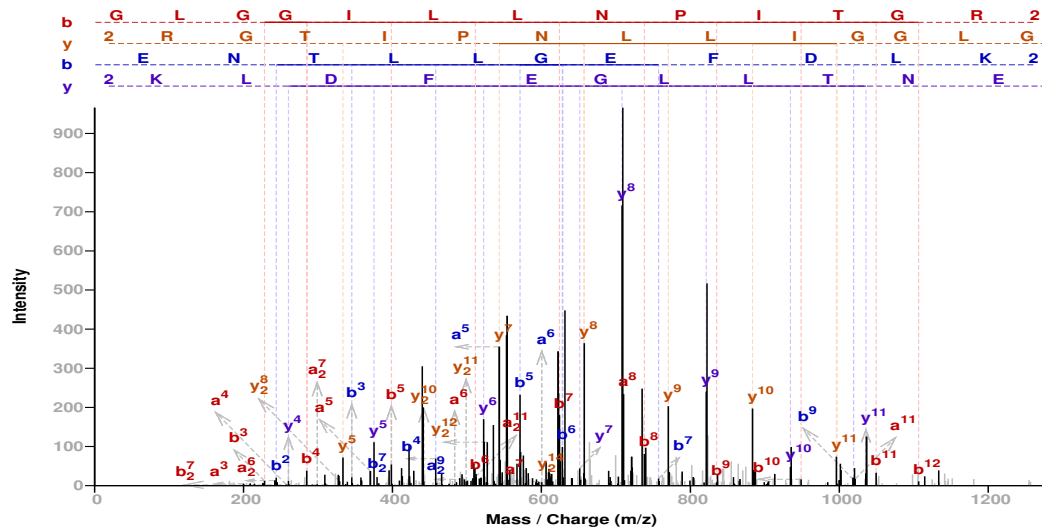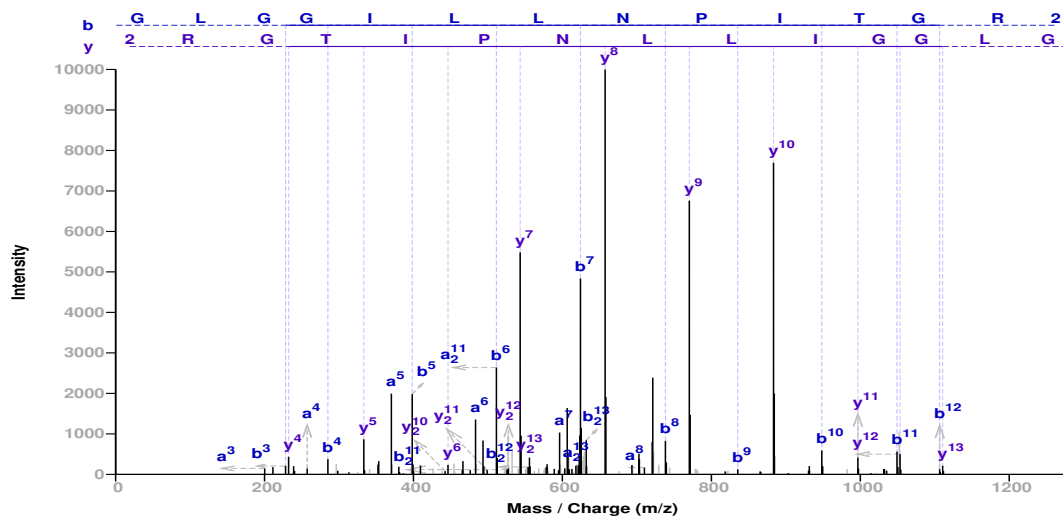

yeast01\_Scan\_Number\_5581 Precursor m/z: 600.287 cosine: 0.729  $\alpha$ : 0.518

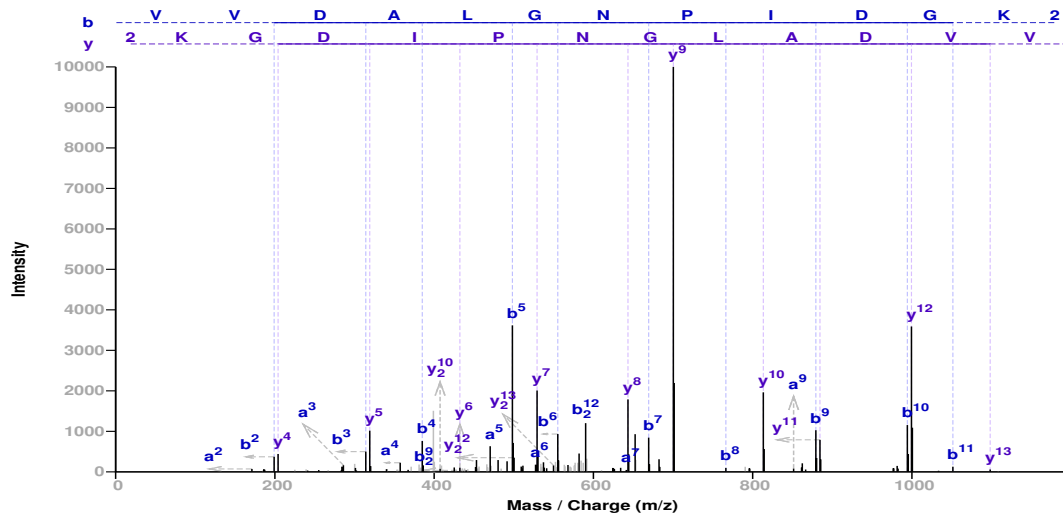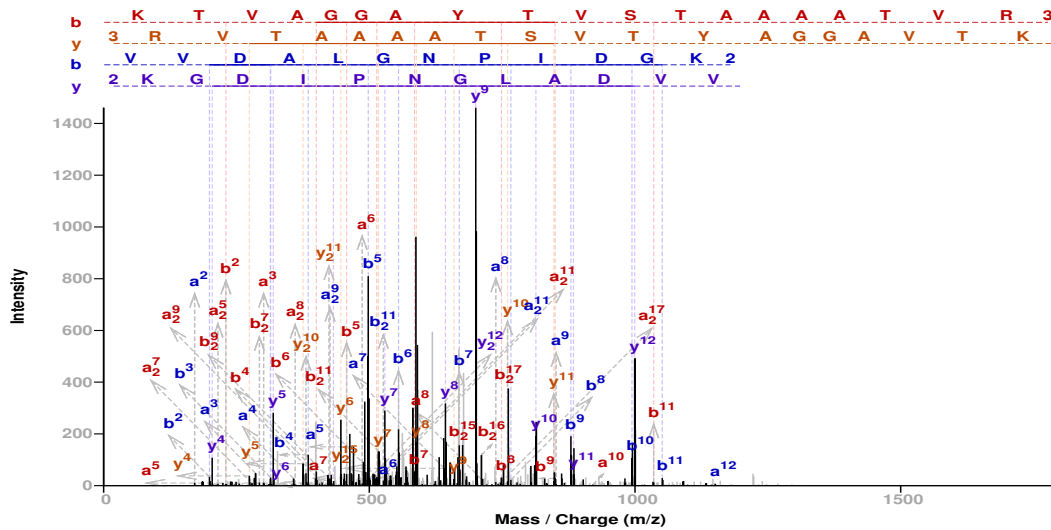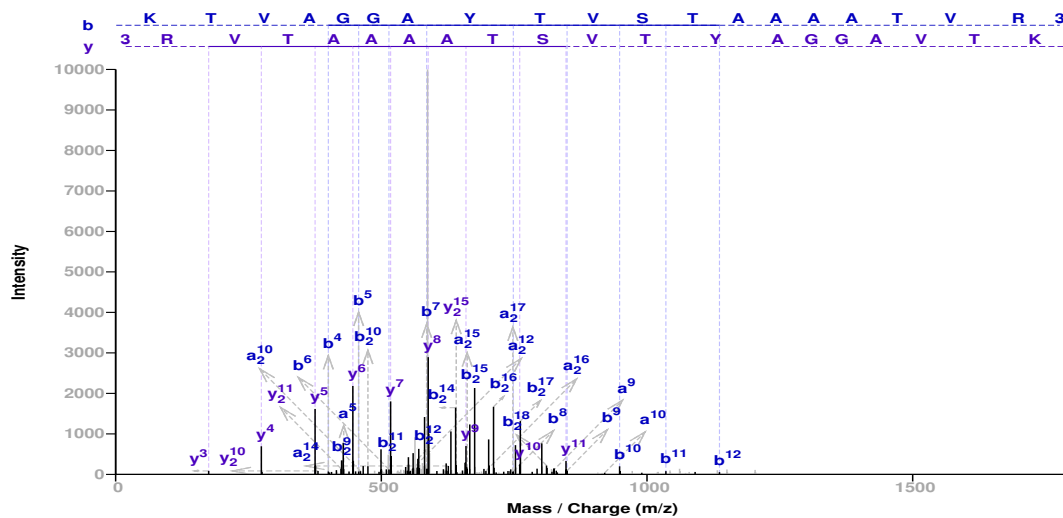

yeast01\_Scan\_Number\_1304 Precursor m/z: 486.782 cosine: 0.758  $\alpha$ : 0.506

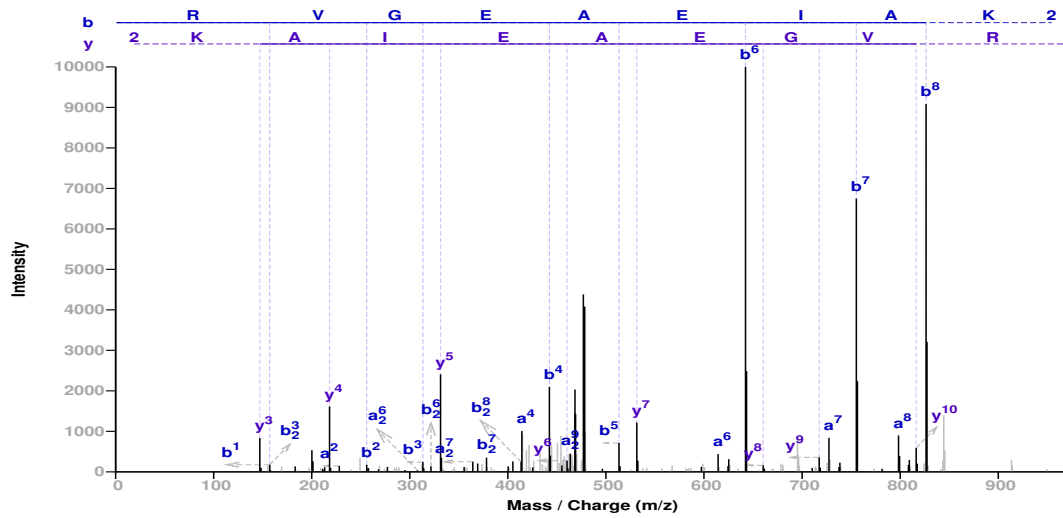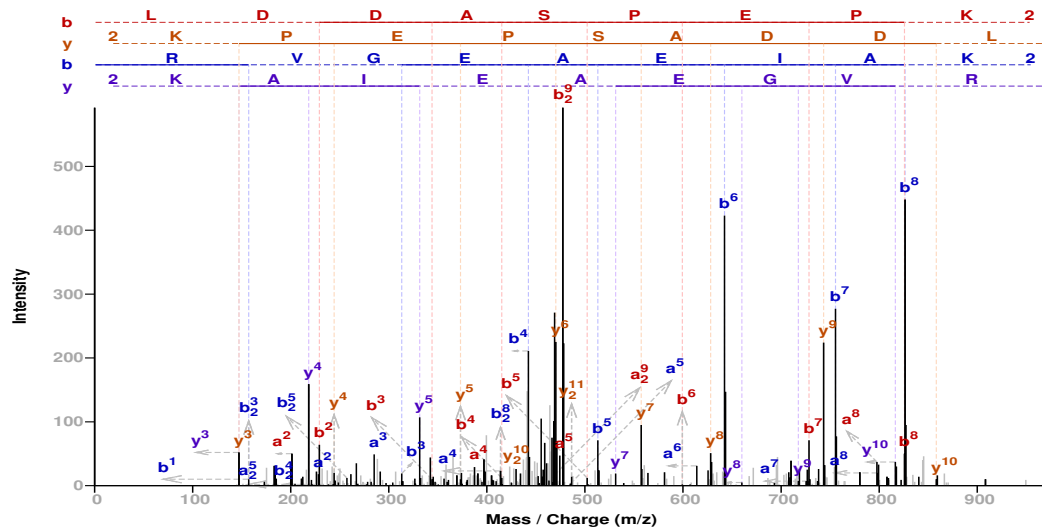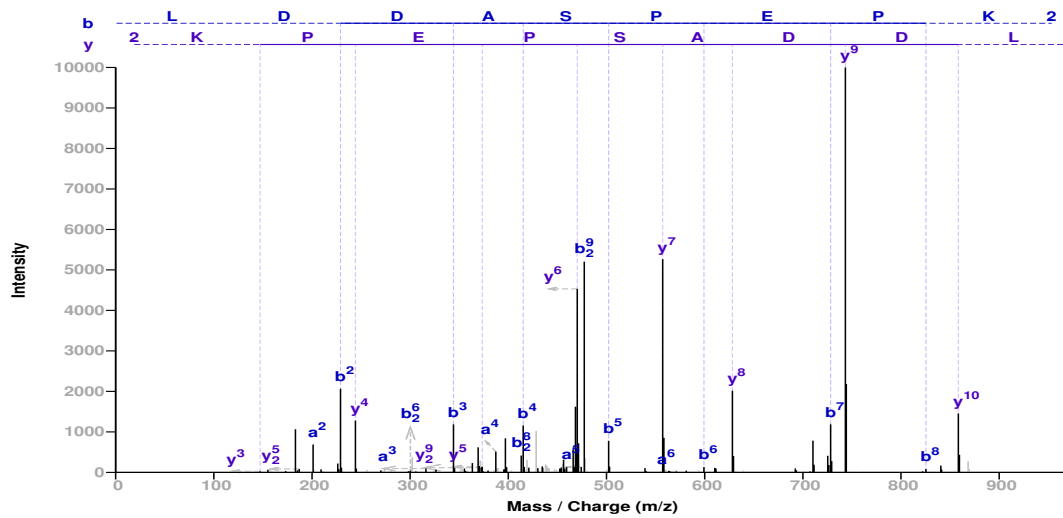

yeast01\_Scan\_Number\_3465 Precursor m/z: 328.878 cosine: 0.833  $\alpha$ : 0.506

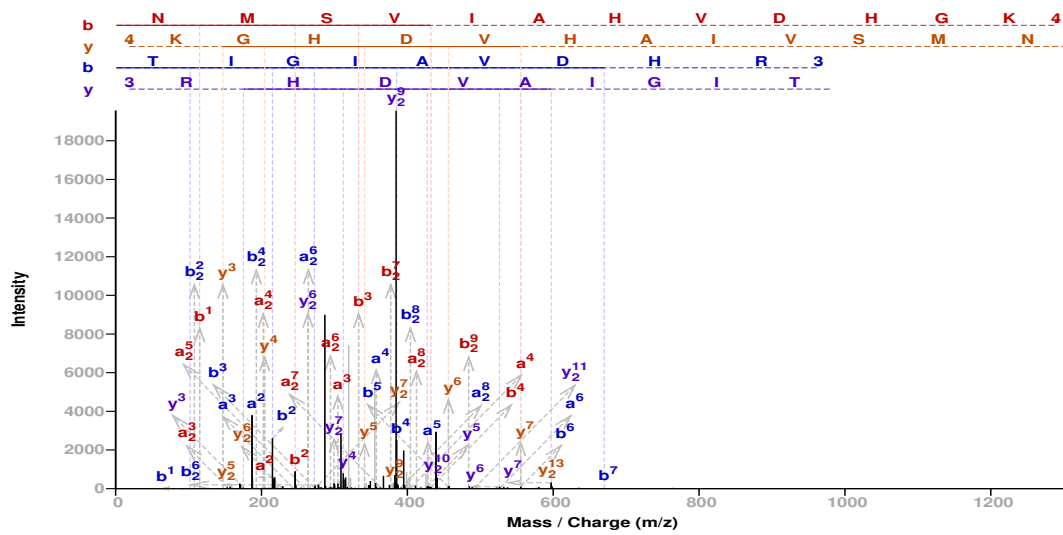

yeast01\_Scan\_Number\_5381 Precursor m/z: 477.580 cosine: 0.849  $\alpha$ : 0.505

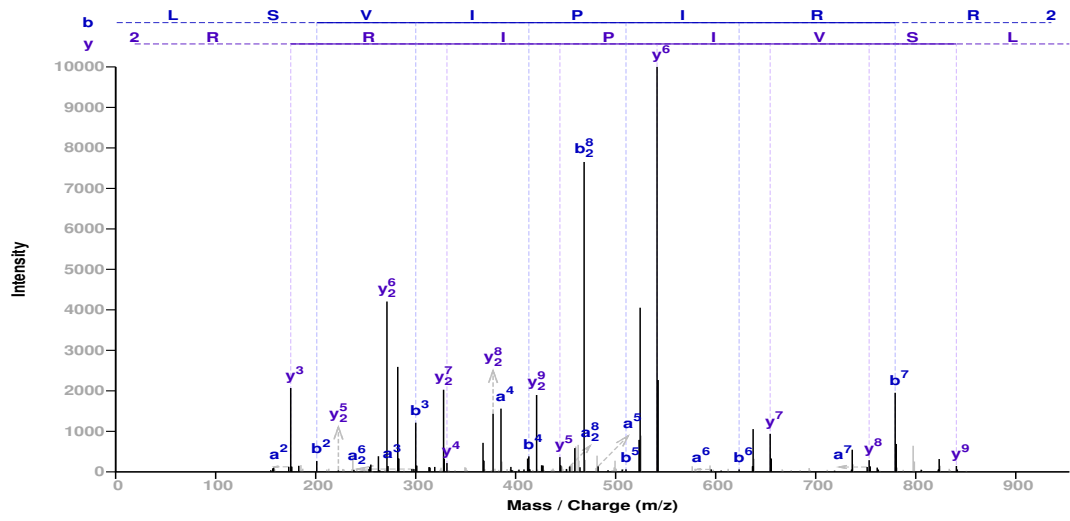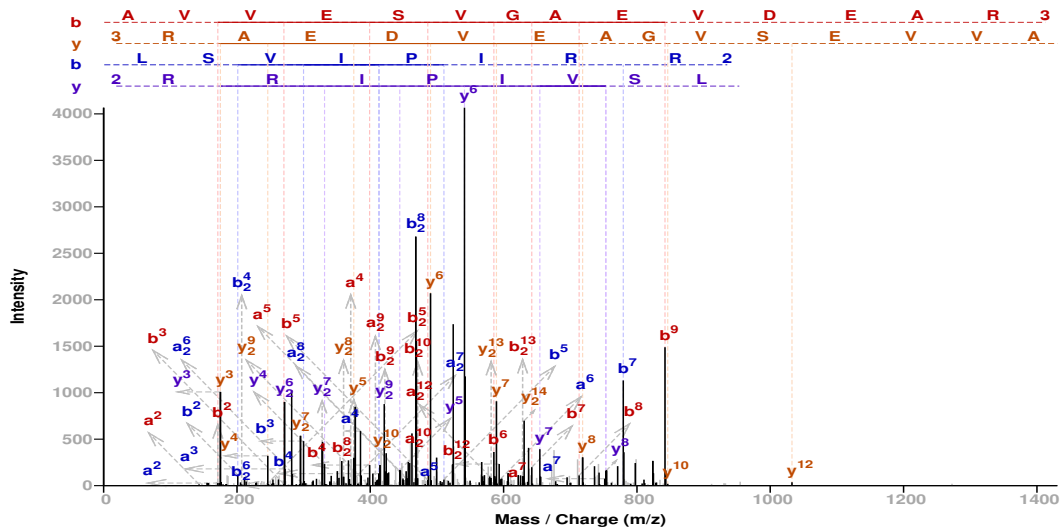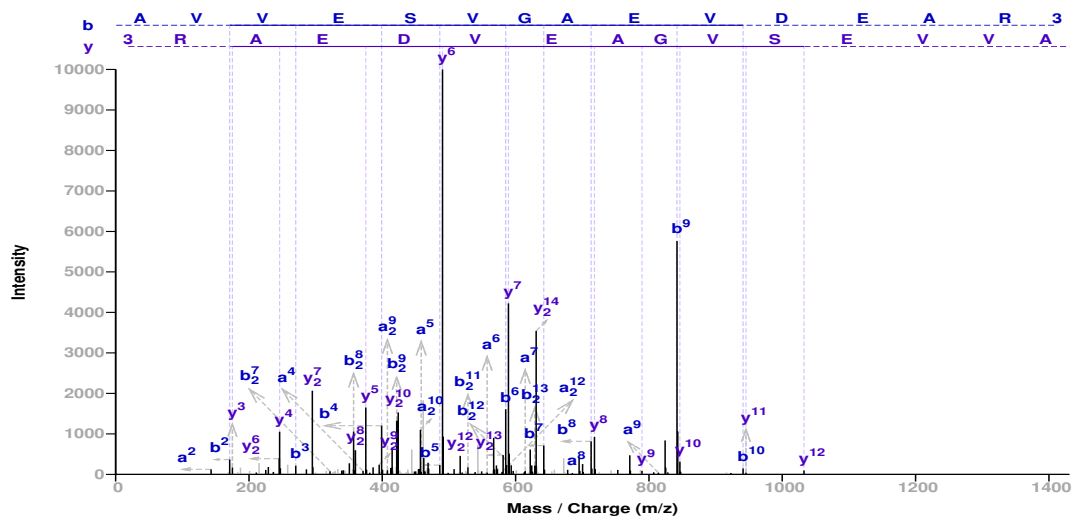

yeast01\_Scan\_Number\_5836 Precursor m/z: 610.316 cosine: 0.783  $\alpha$ : 0.498

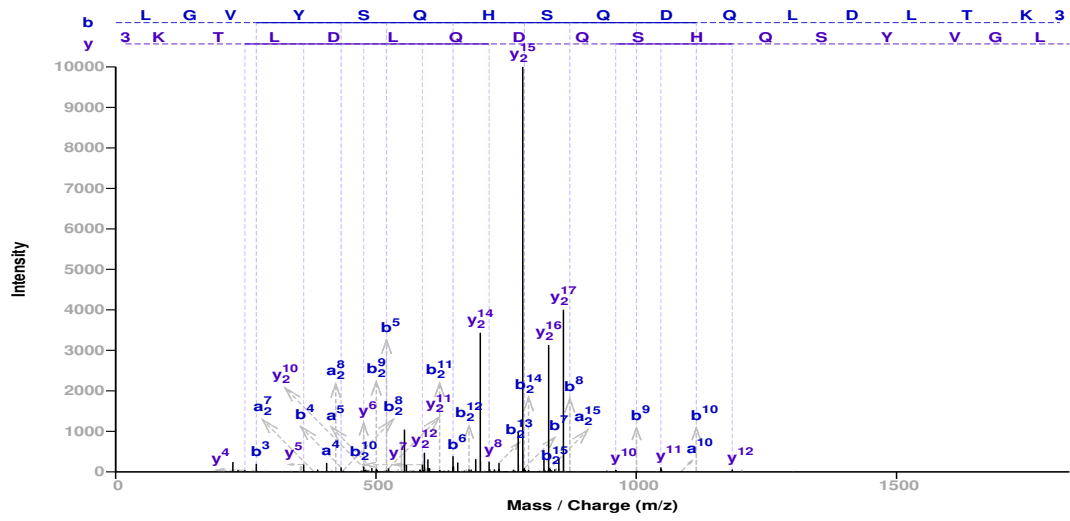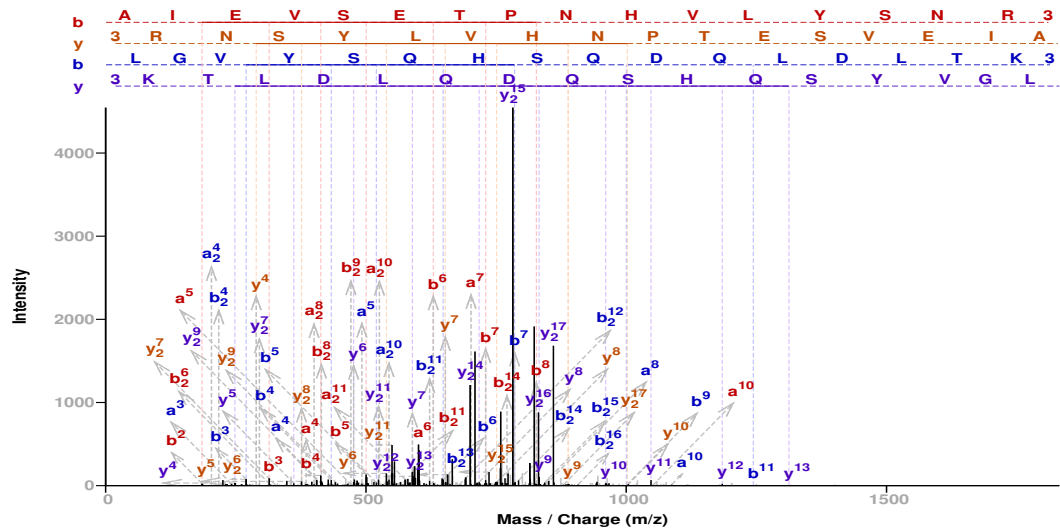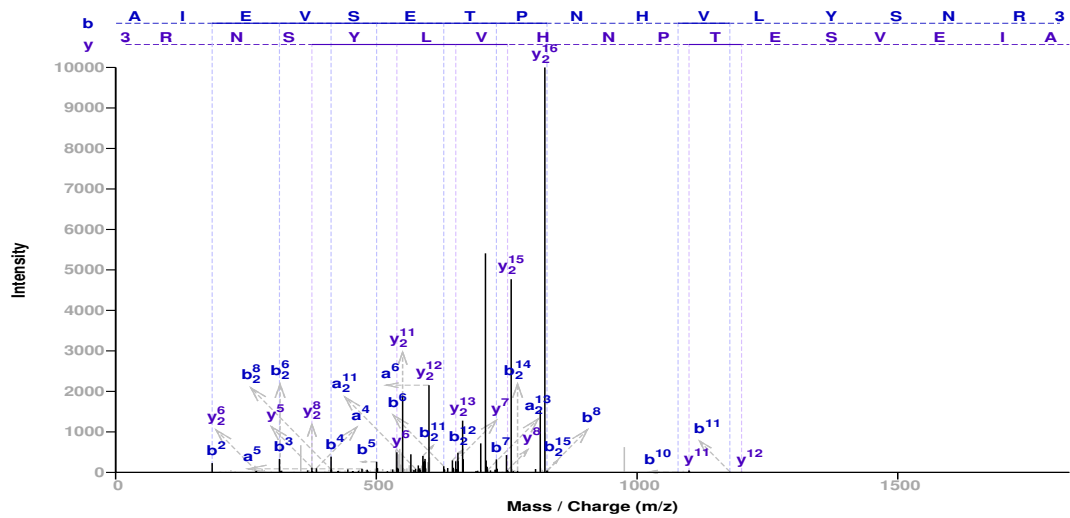



yeast01\_Scan\_Number\_4258 Precursor m/z: 508.770 cosine: 0.746  $\alpha$ : 0.494

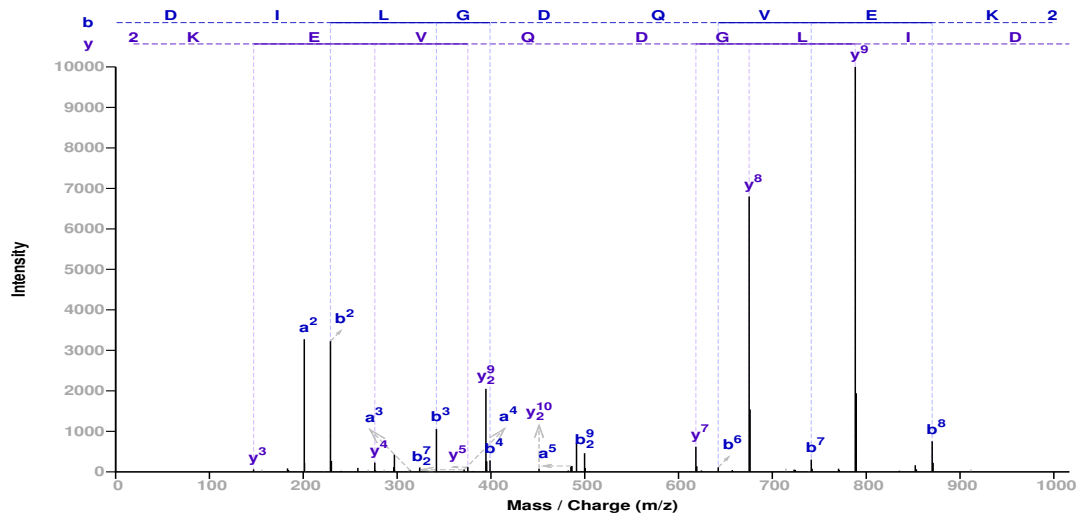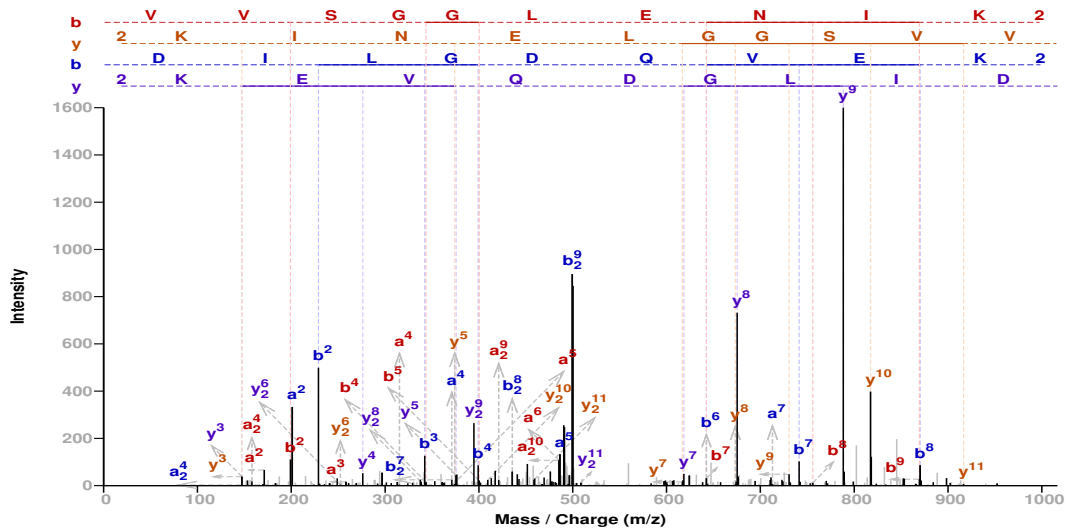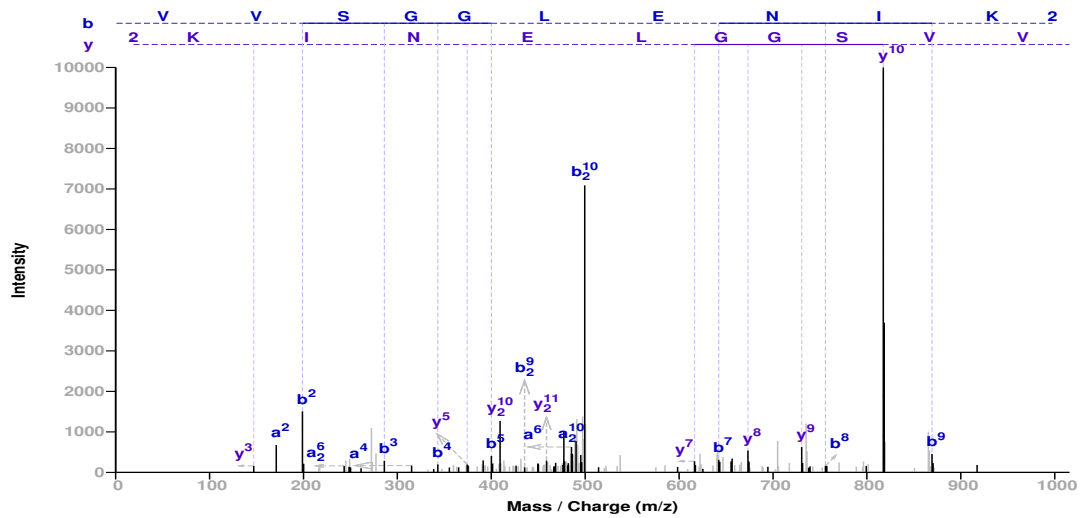

yeast01\_Scan\_Number\_5024 Precursor m/z: 414.779 cosine: 0.770  $\alpha$ : 0.493

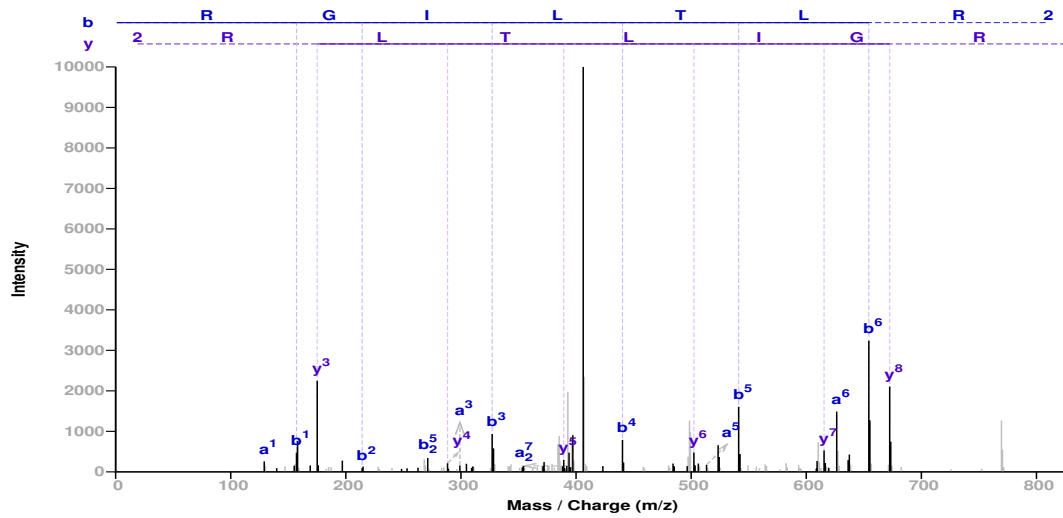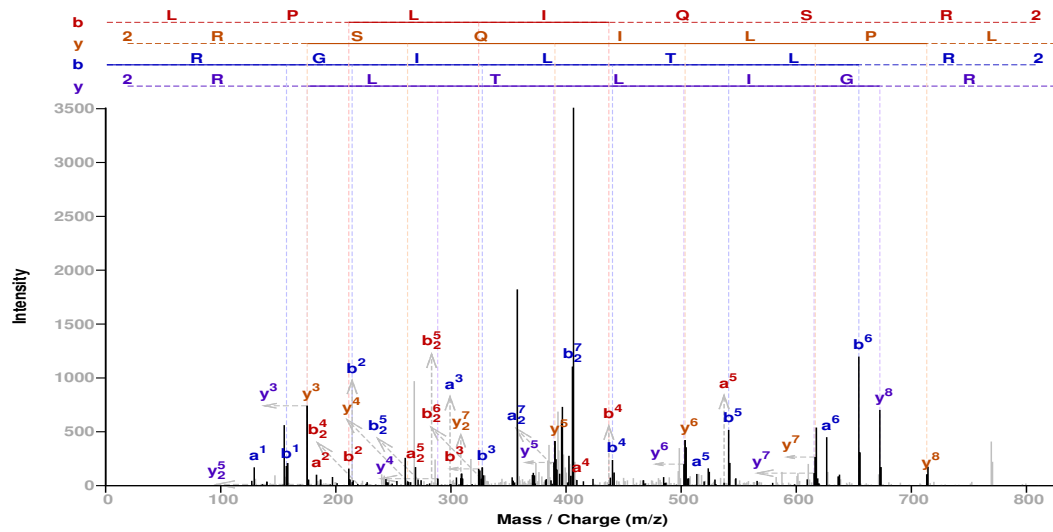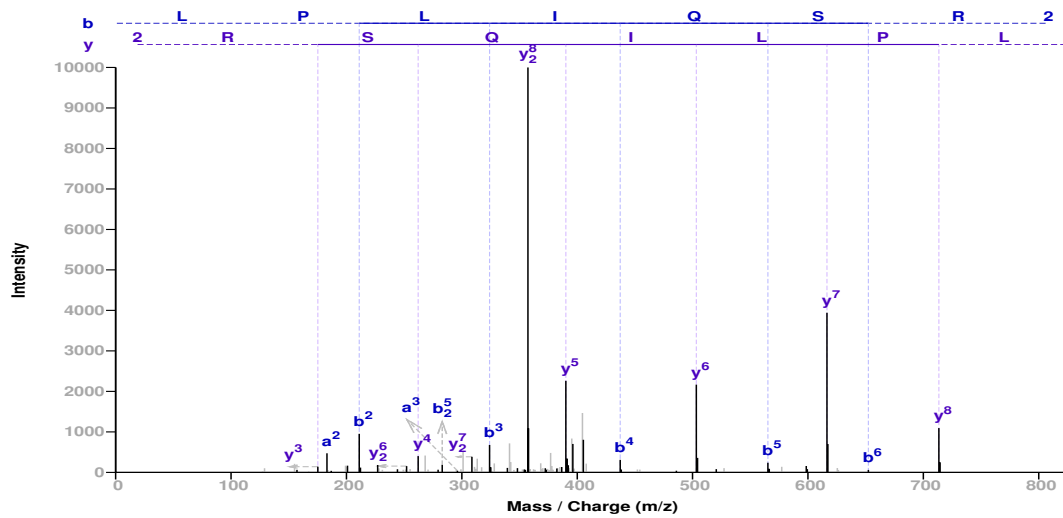

yeast01\_Scan\_Number\_6334 Precursor m/z: 619.993 cosine: 0.805  $\alpha$ : 0.491

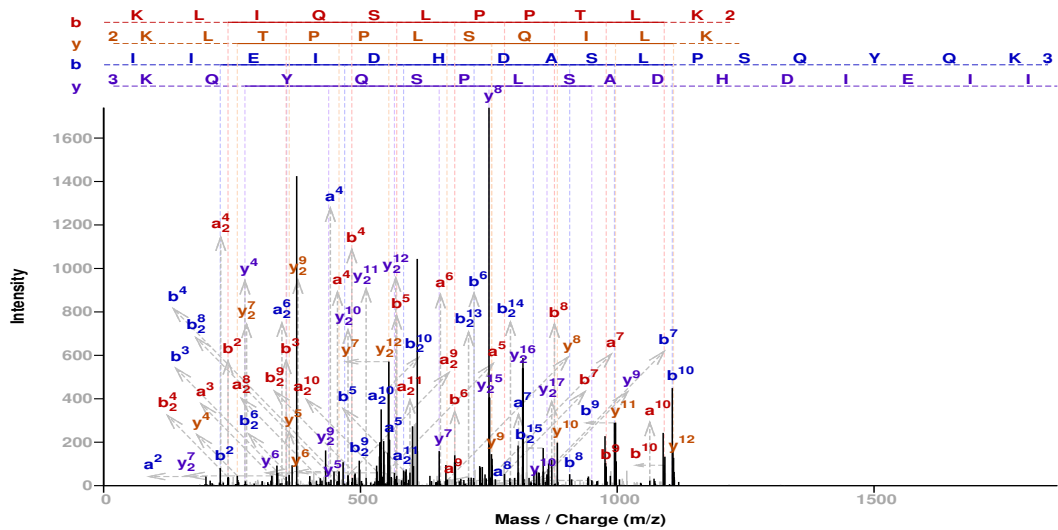

yeast01\_Scan\_Number\_6857 Precursor m/z: 404.237 cosine: 0.734  $\alpha$ : 0.484

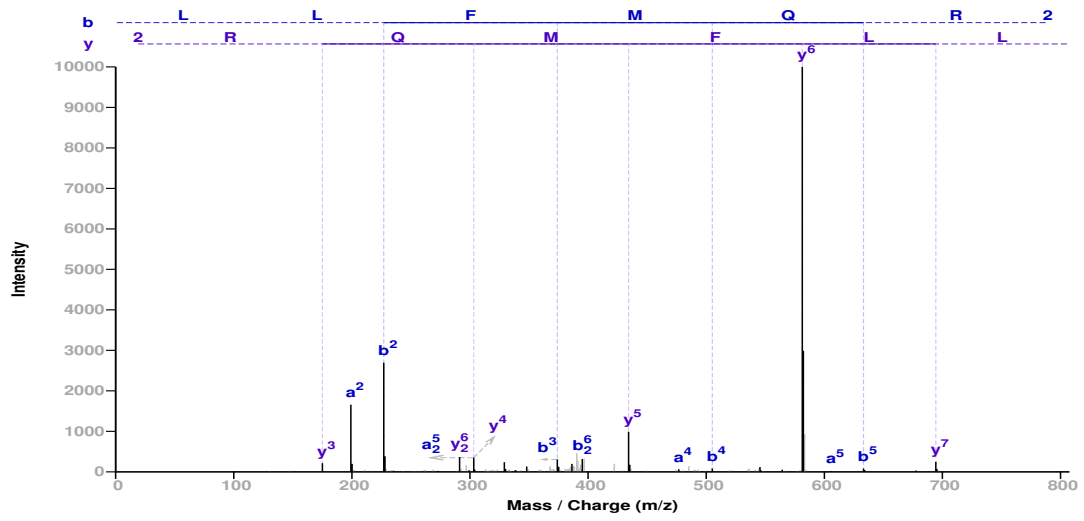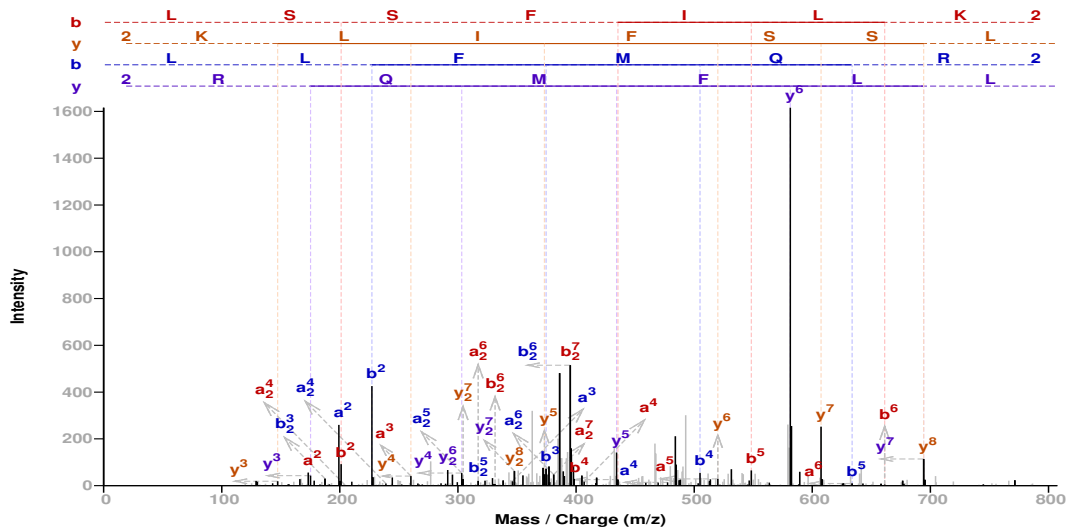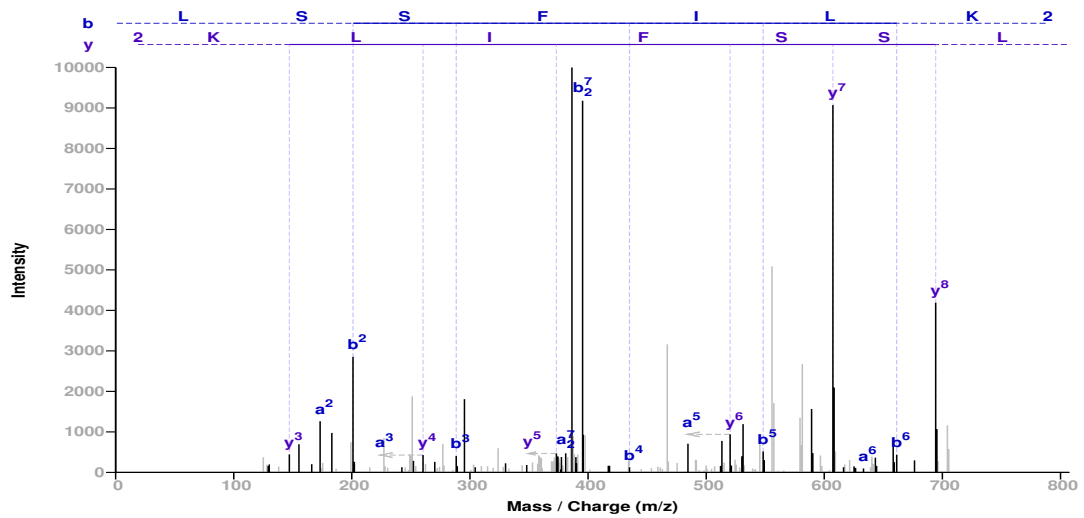

yeast01\_Scan\_Number\_2347 Precursor m/z: 388.223 cosine: 0.778  $\alpha$ : 0.482

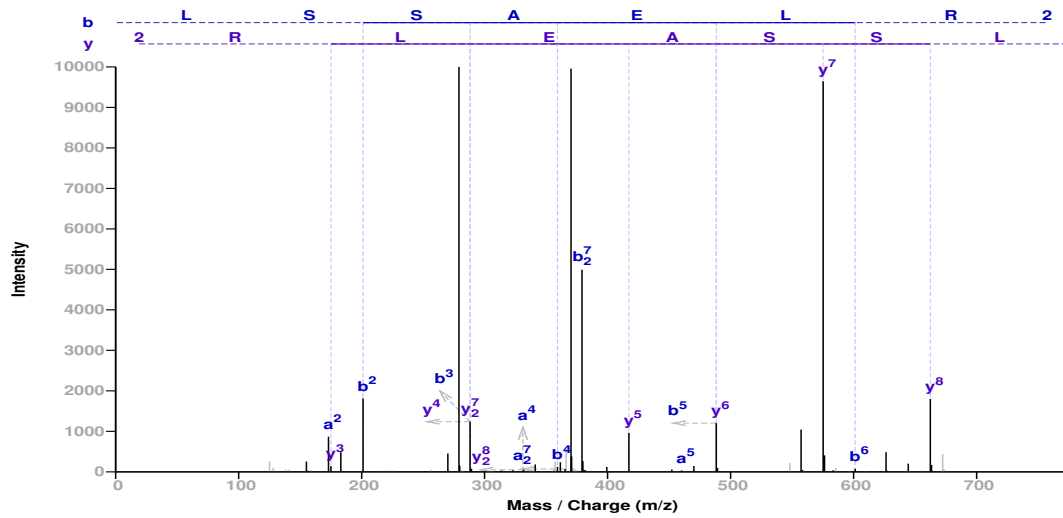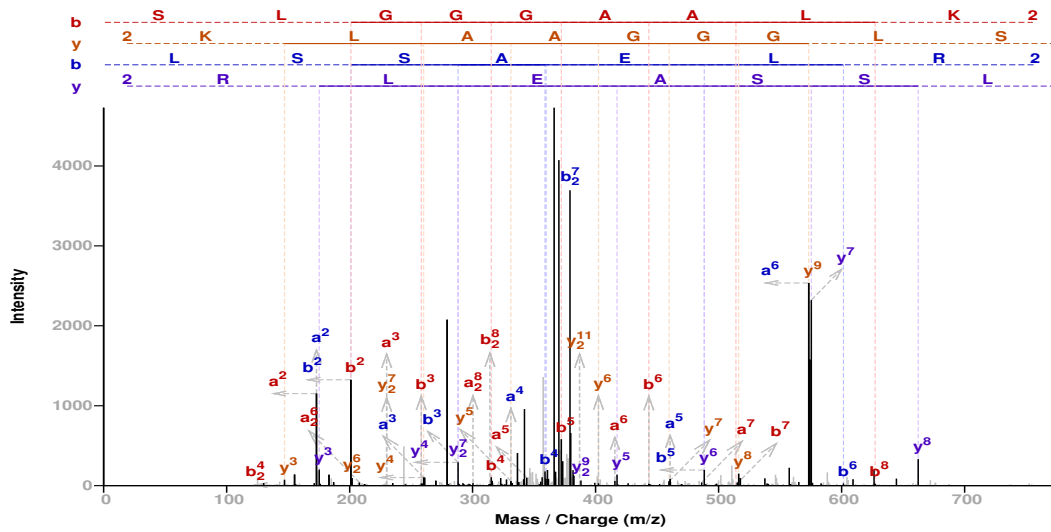

yeast01\_Scan\_Number\_5792 Precursor m/z: 400.699 cosine: 0.888  $\alpha$ : 0.480

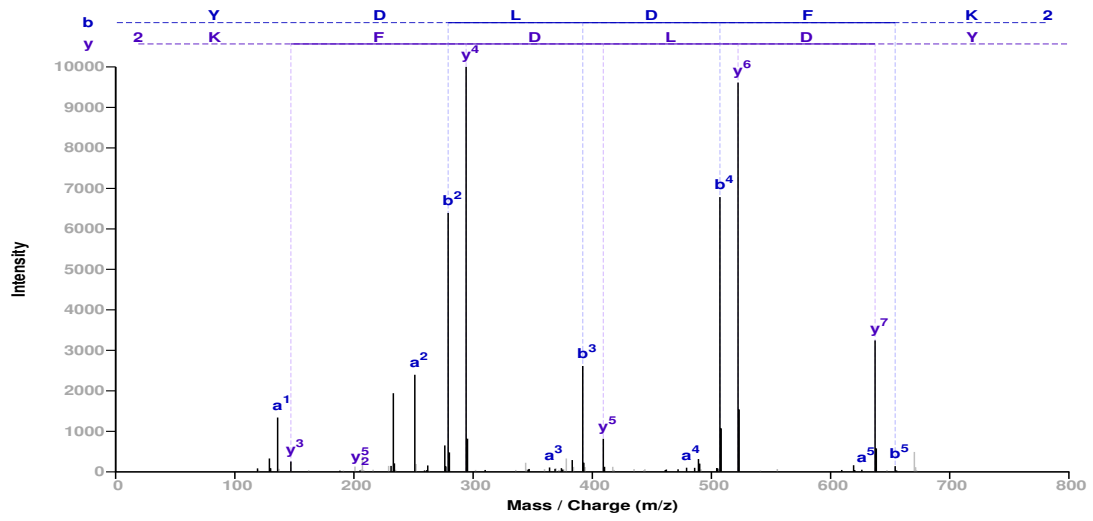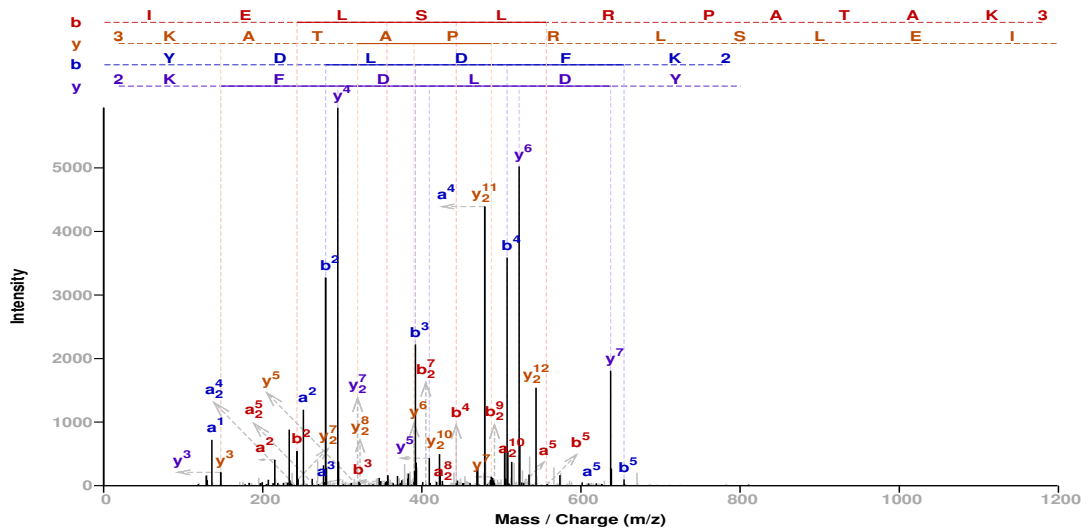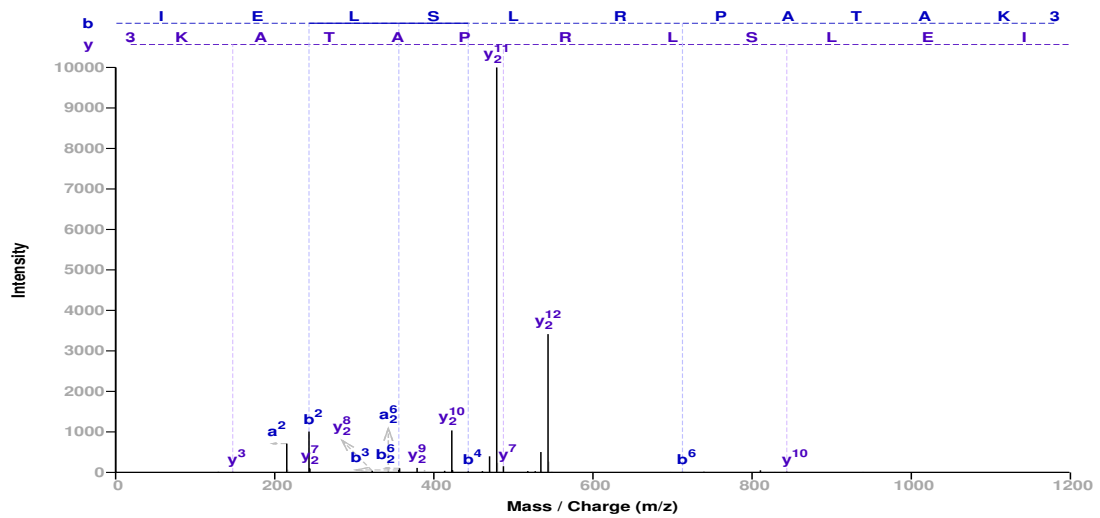

yeast01\_Scan\_Number\_9423 Precursor m/z: 566.003 cosine: 0.779  $\alpha$ : 0.479

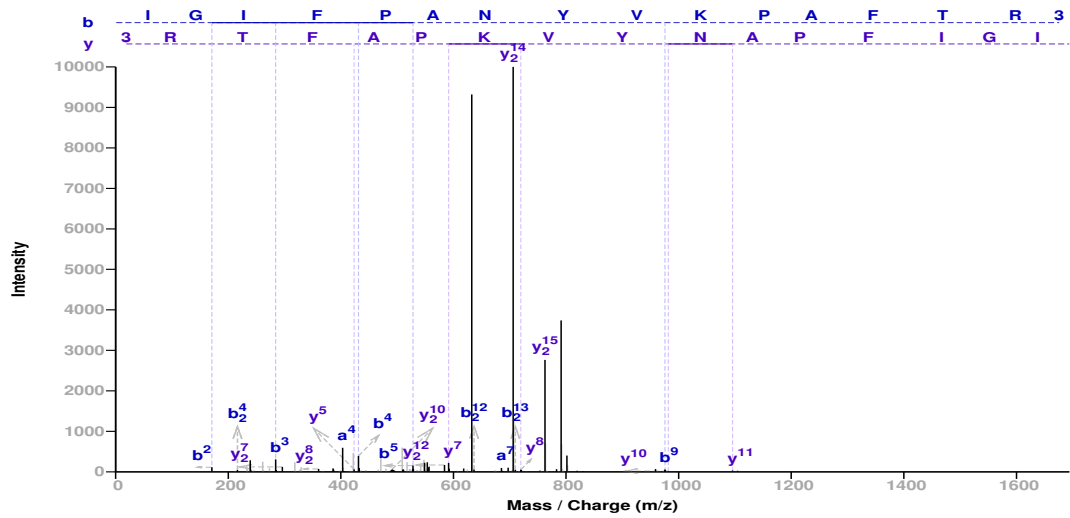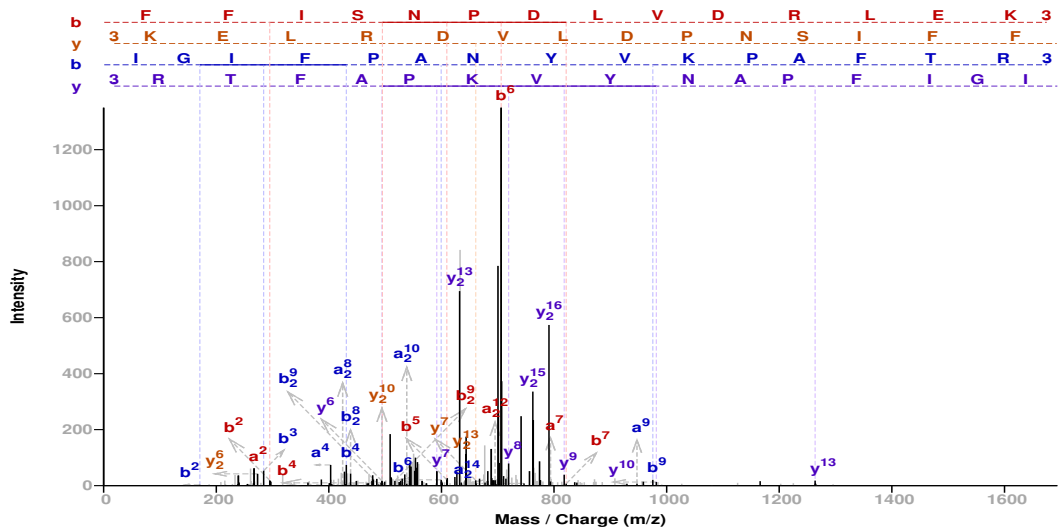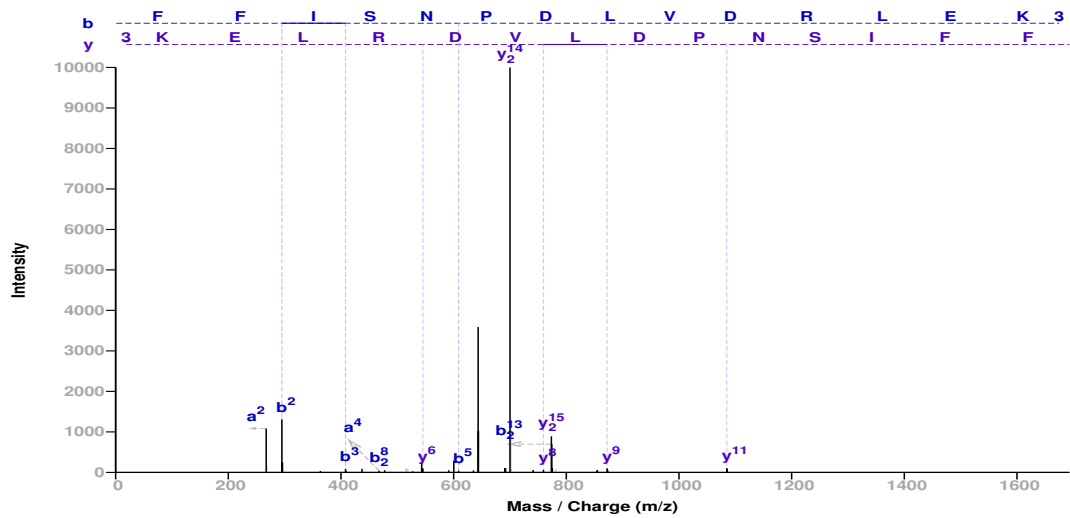

yeast01\_Scan\_Number\_7877 Precursor m/z: 648.889 cosine: 0.789  $\alpha$ : 0.469

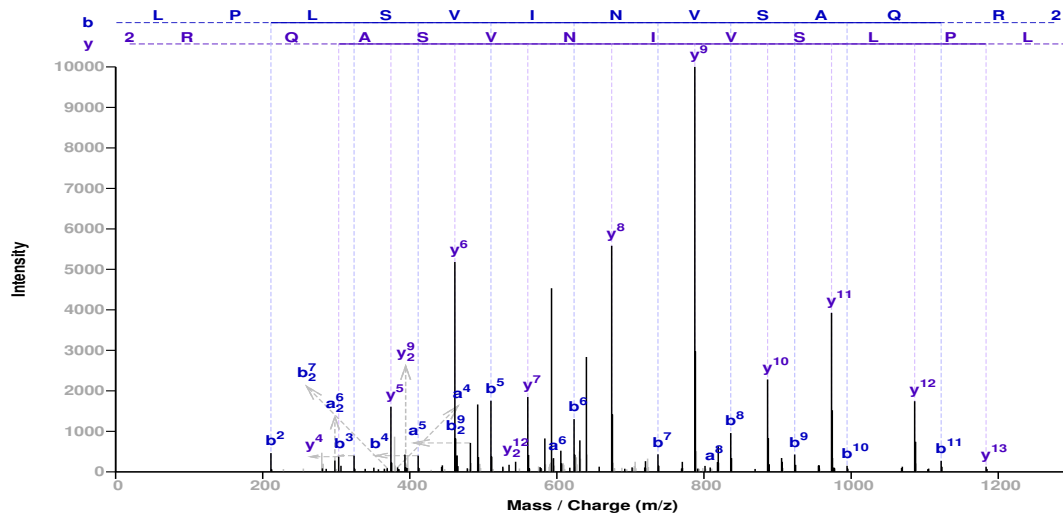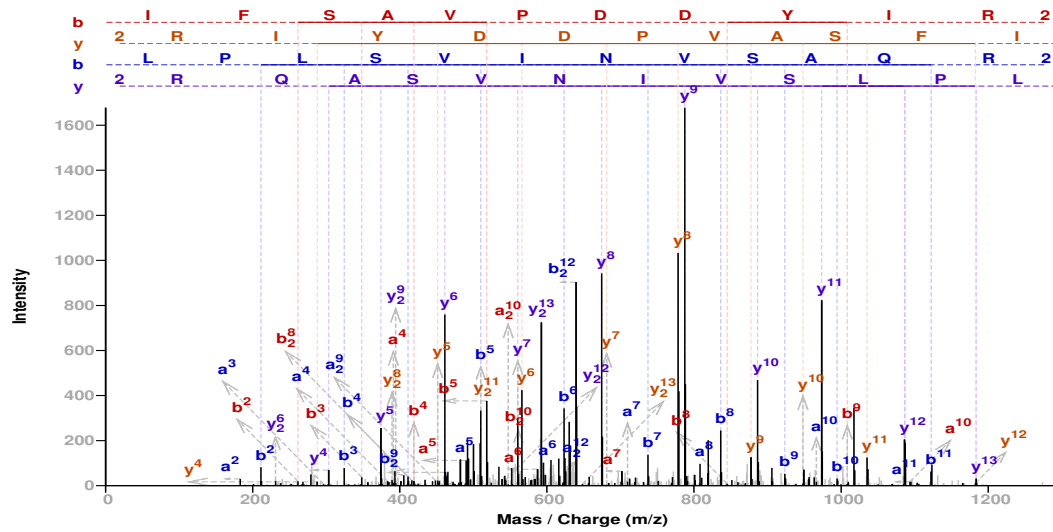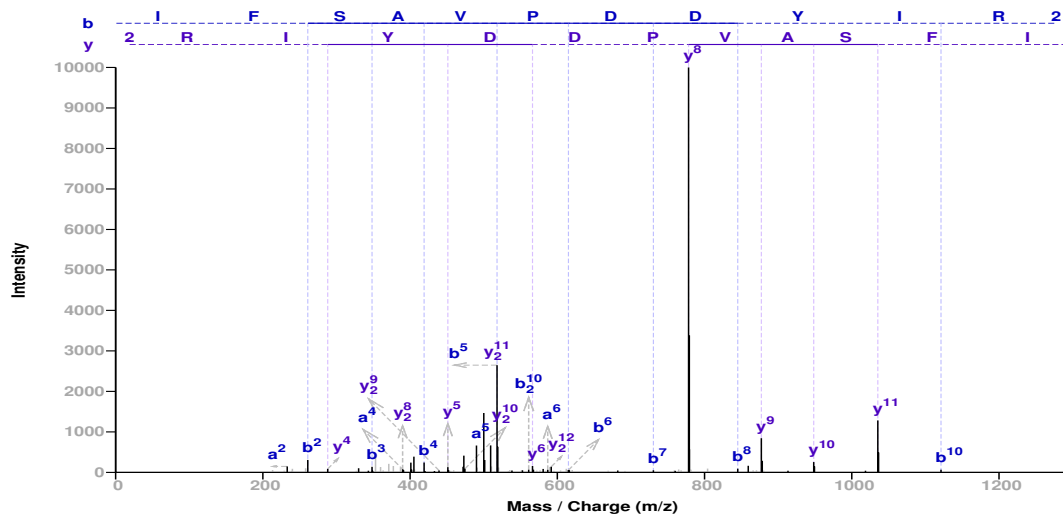



yeast01\_Scan\_Number\_4367 Precursor m/z: 426.887 cosine: 0.879  $\alpha$ : 0.464

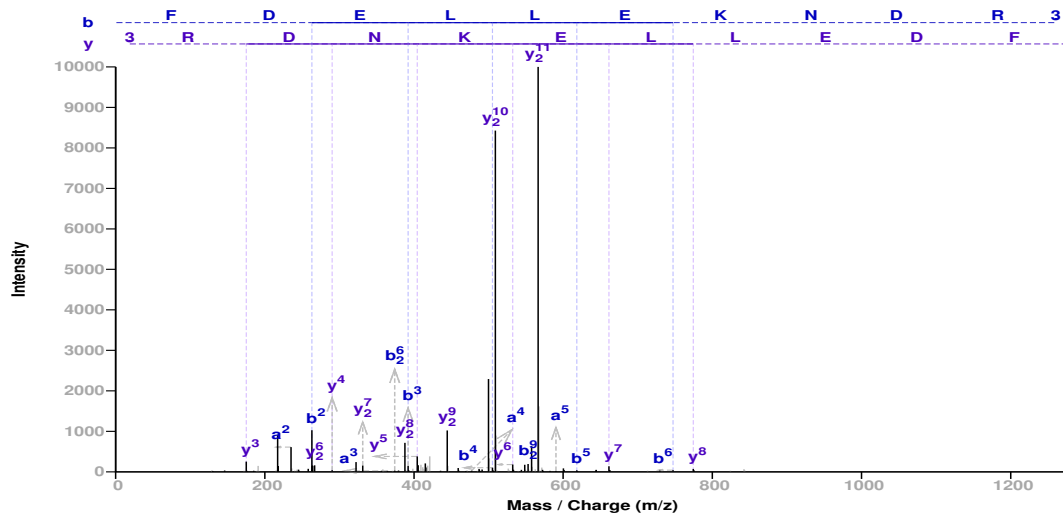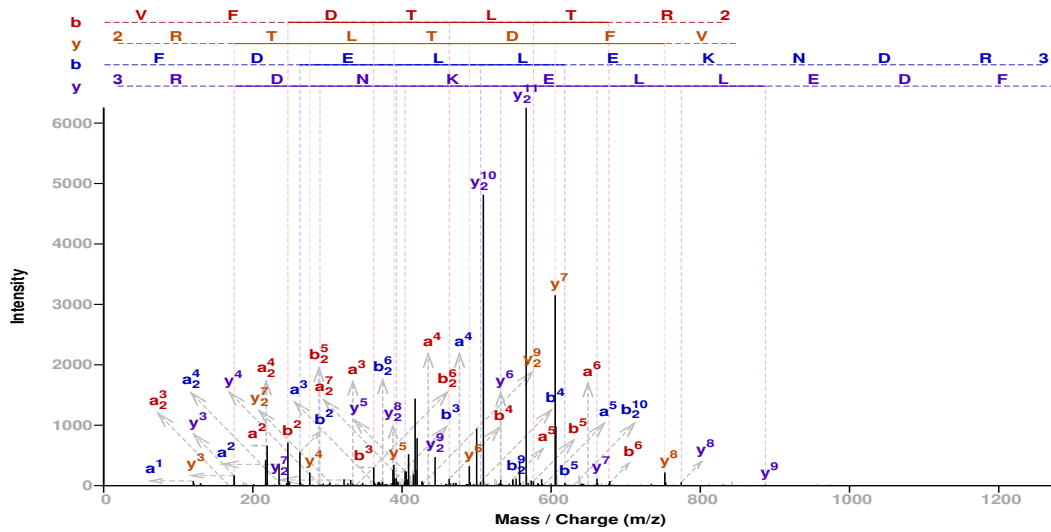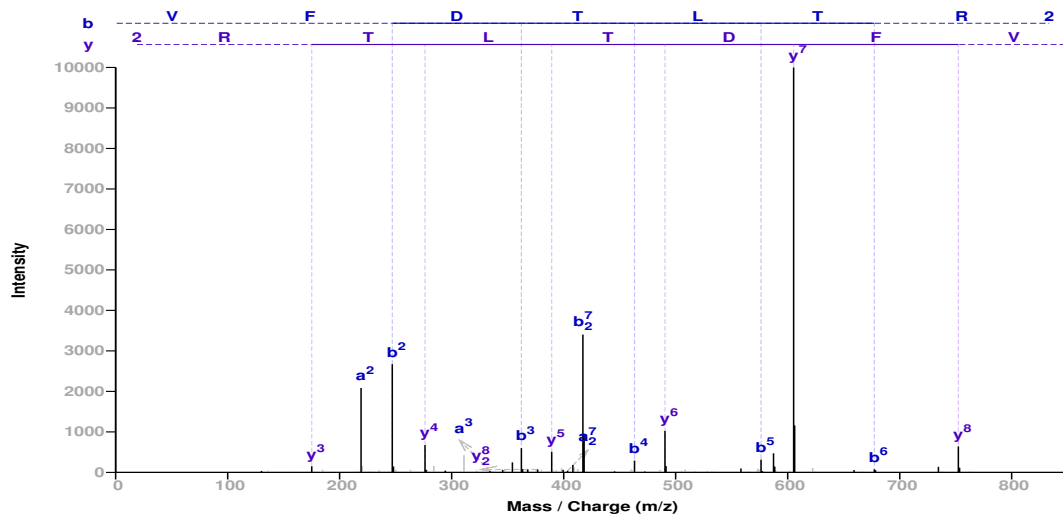

yeast01\_Scan\_Number\_4822 Precursor m/z: 637.812 cosine: 0.770  $\alpha$ : 0.460

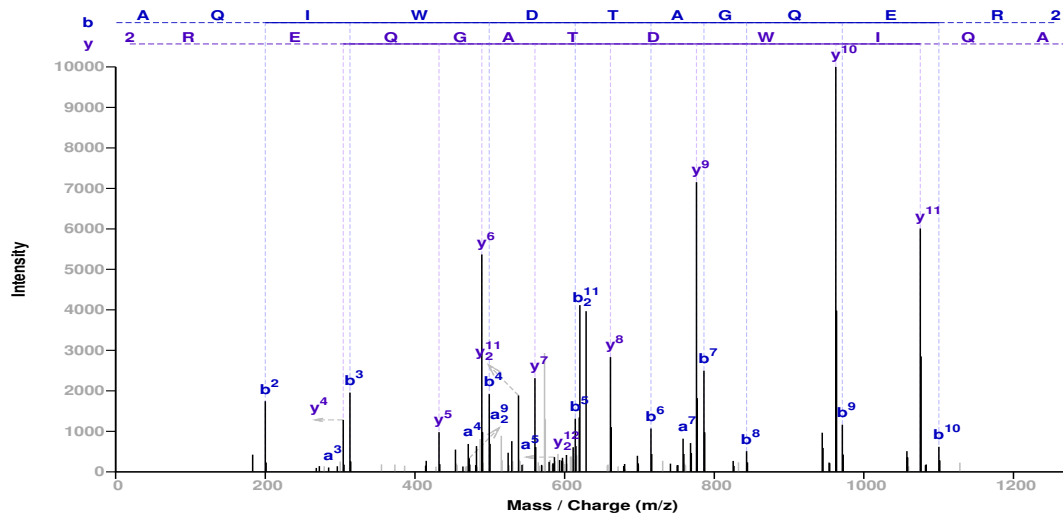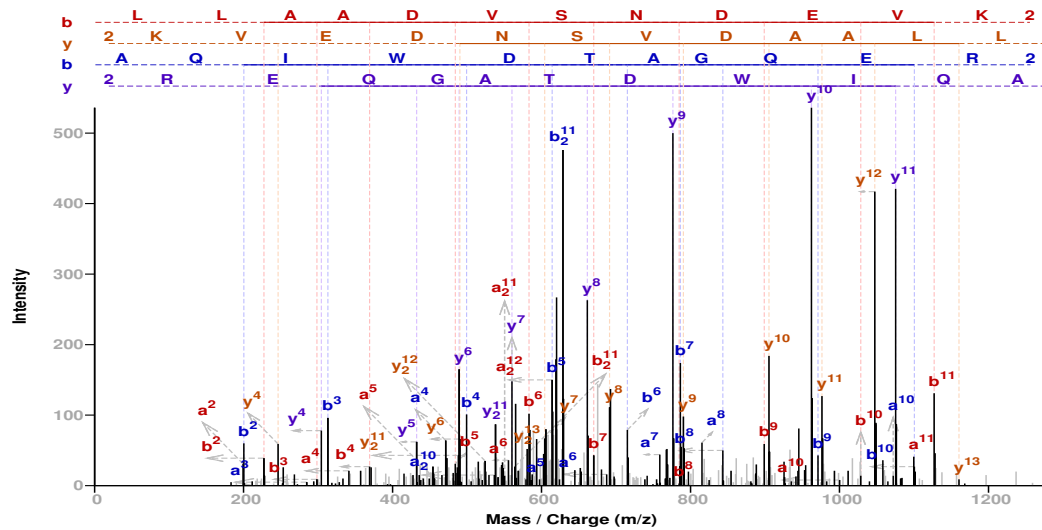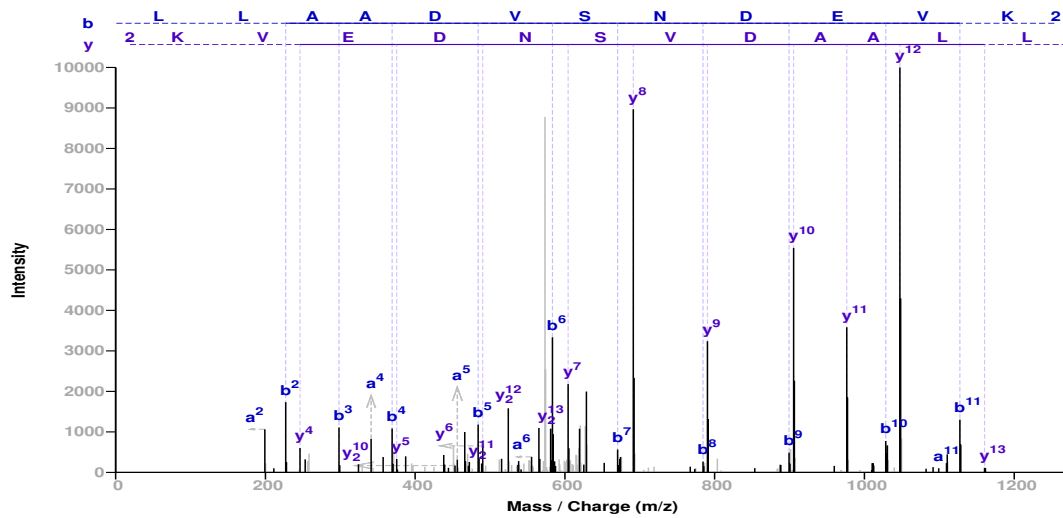

yeast01\_Scan\_Number\_7363 Precursor m/z: 618.327 cosine: 0.817  $\alpha$ : 0.456

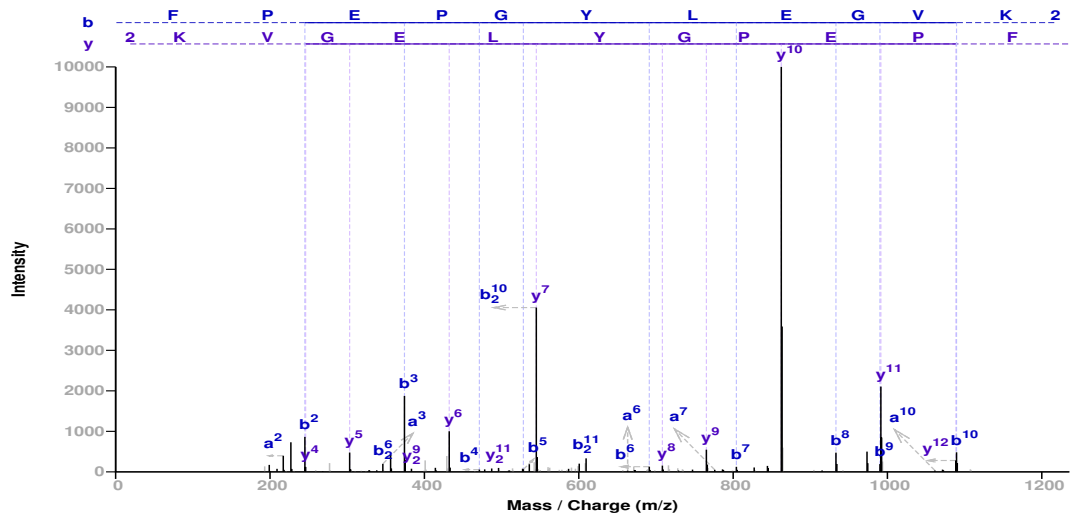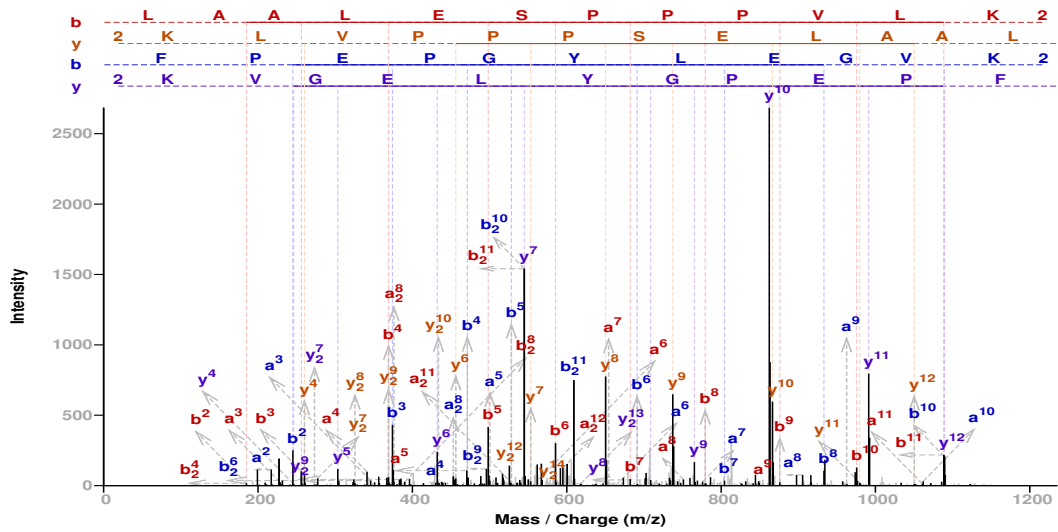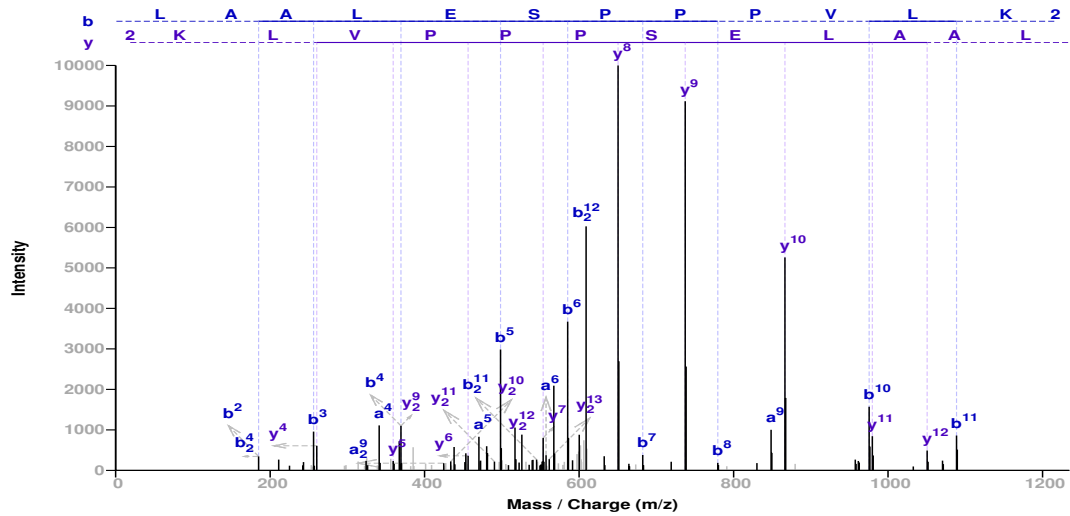

yeast01\_Scan\_Number\_2053 Precursor m/z: 508.605 cosine: 0.805  $\alpha$ : 0.447

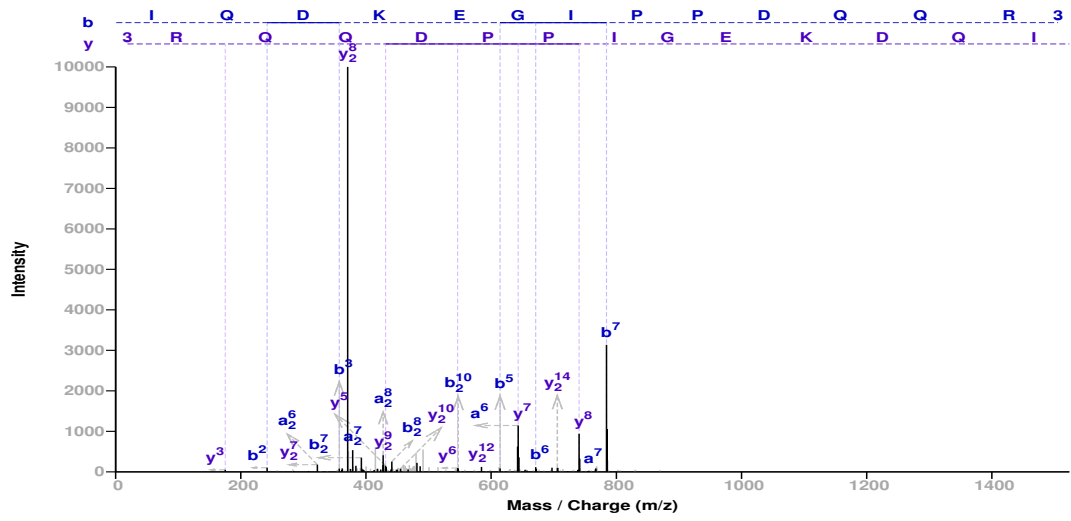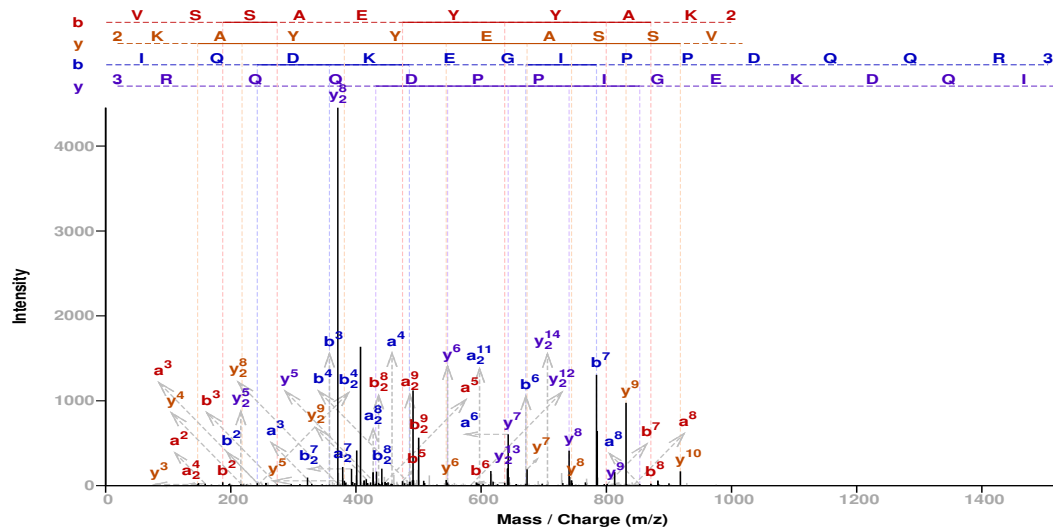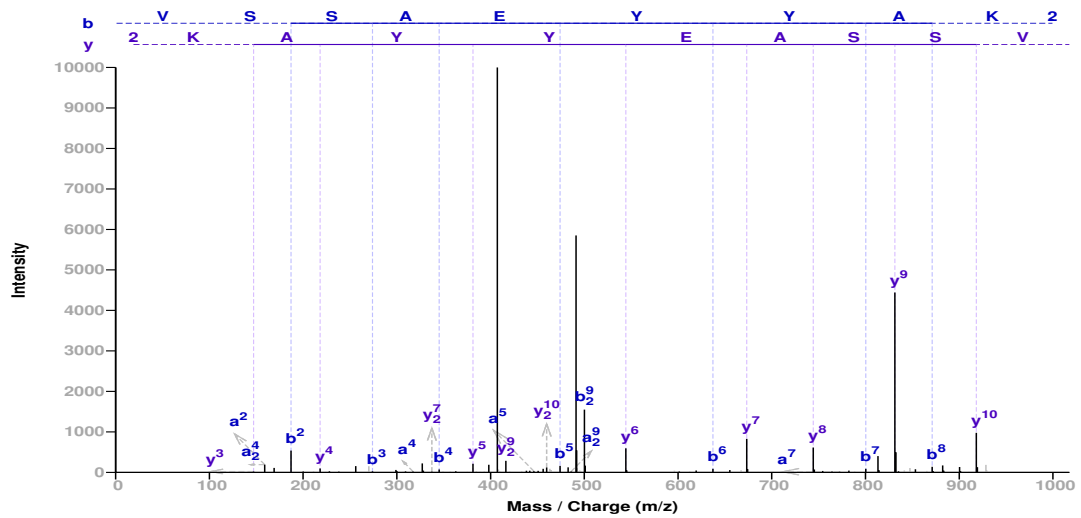

yeast01\_Scan\_Number\_9419 Precursor m/z: 703.048 cosine: 0.760  $\alpha$ : 0.446

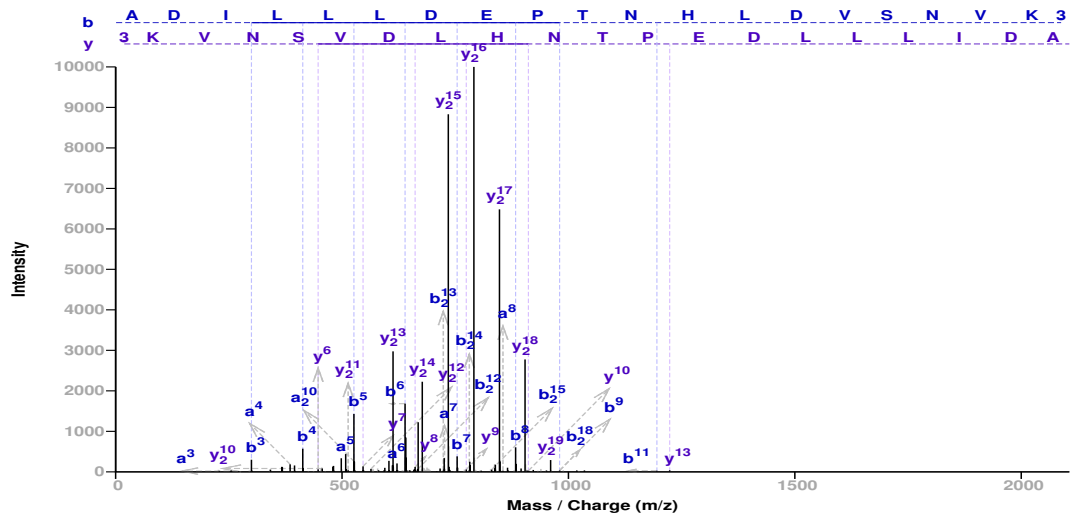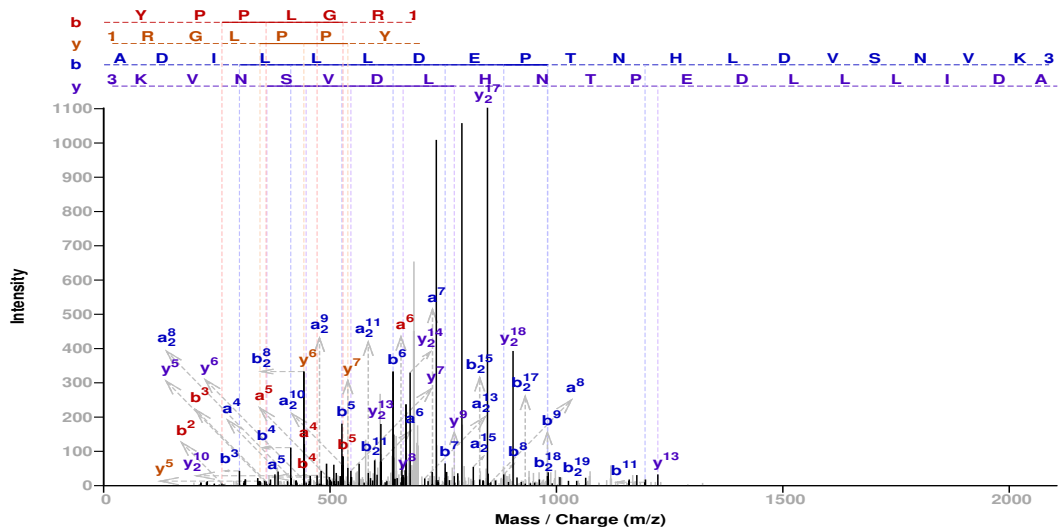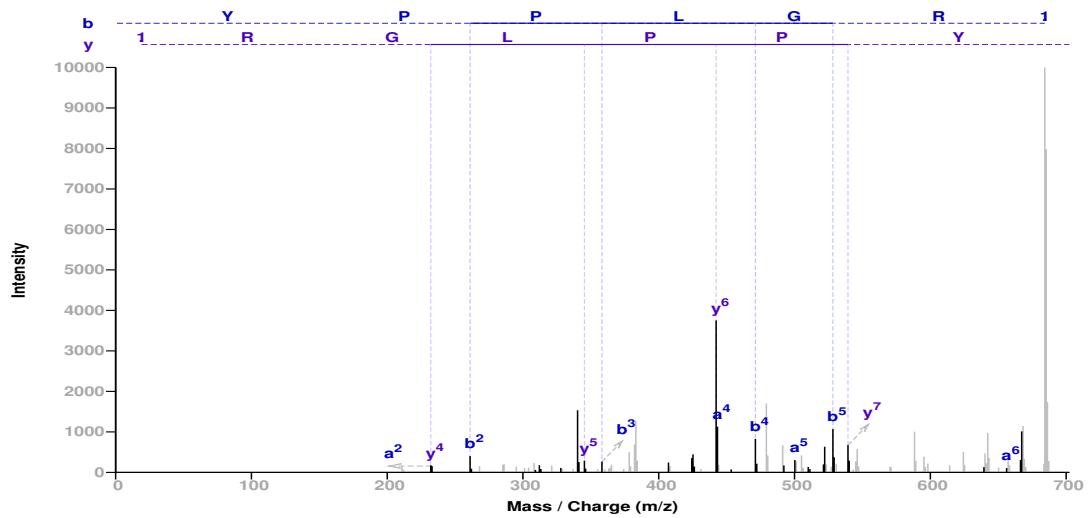

yeast01\_Scan\_Number\_3621 Precursor m/z: 581.268 cosine: 0.862  $\alpha$ : 0.446

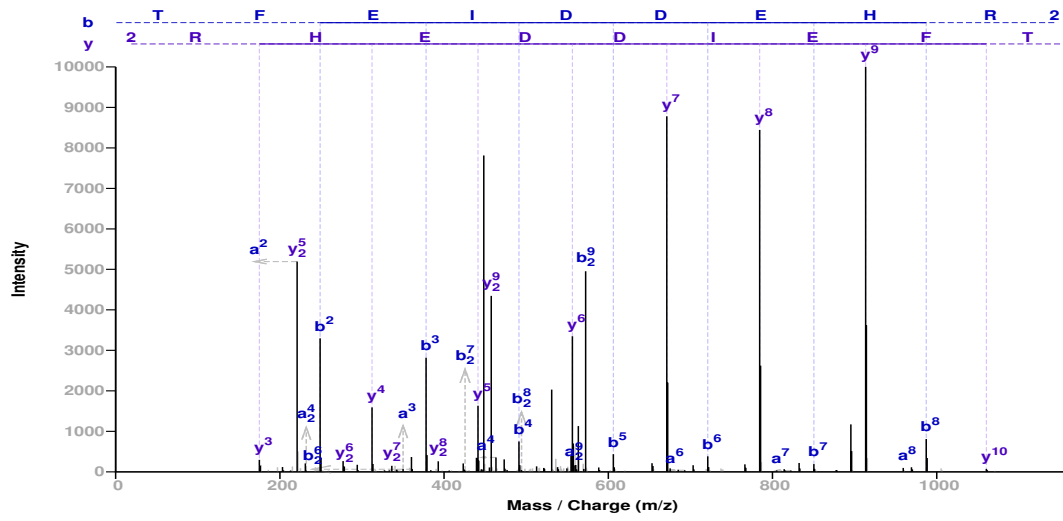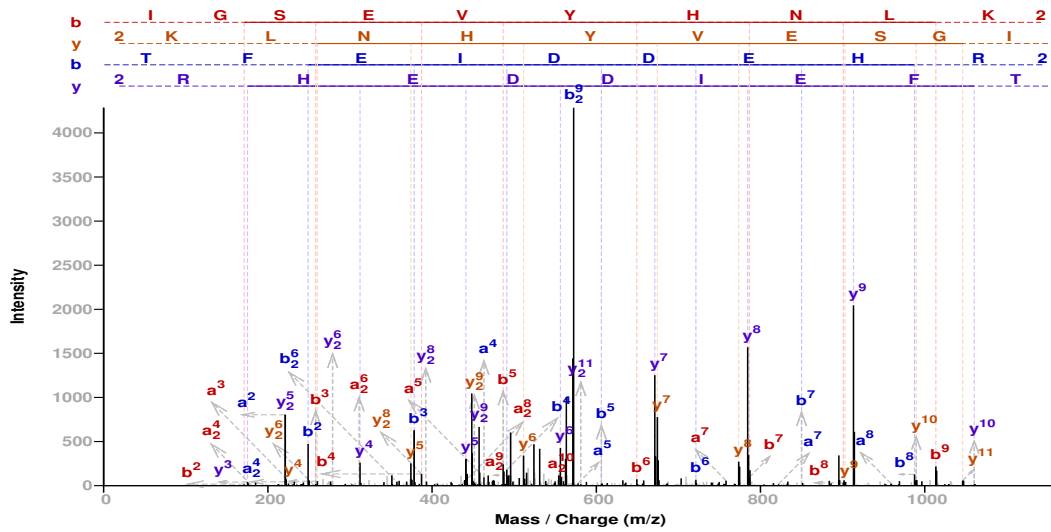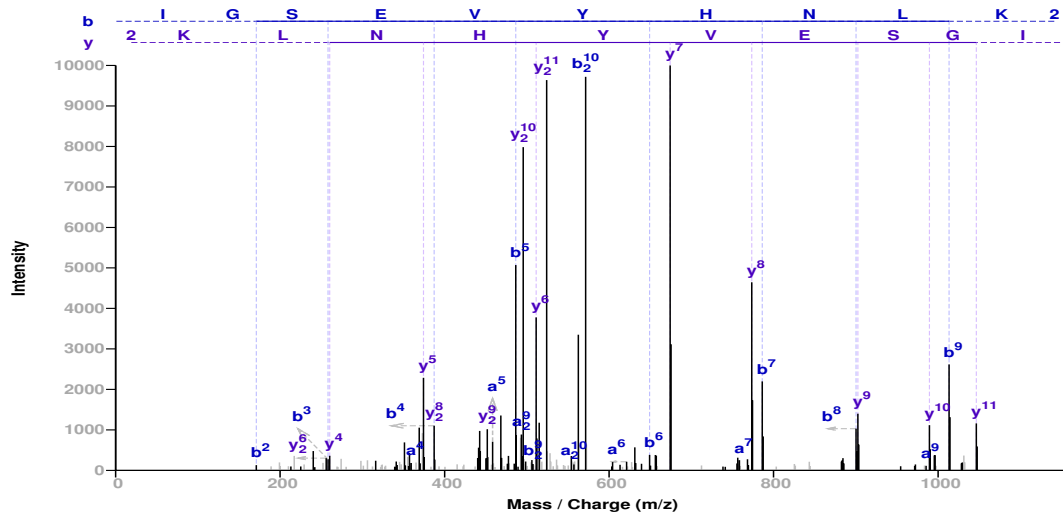

yeast01\_Scan\_Number\_2460 Precursor m/z: 446.238 cosine: 0.734  $\alpha$ : 0.439

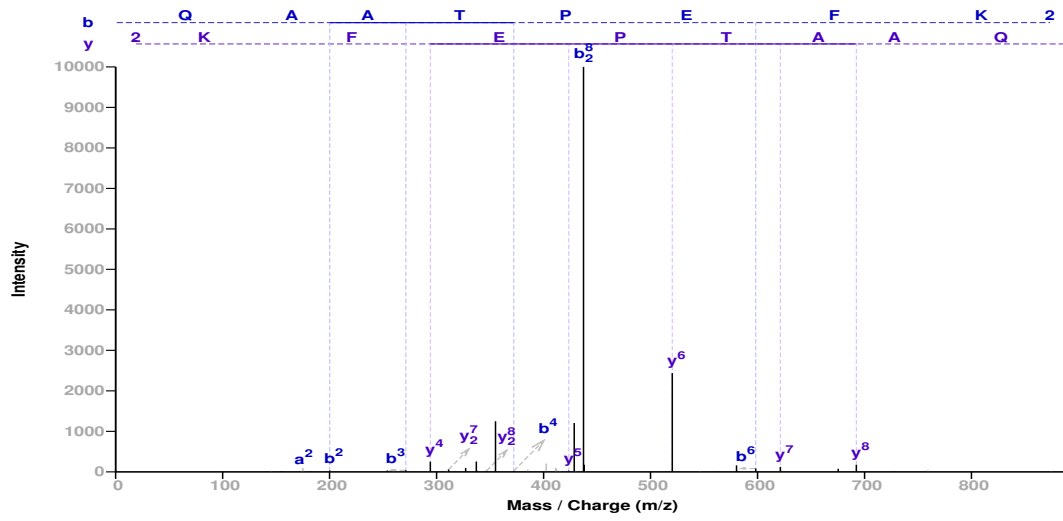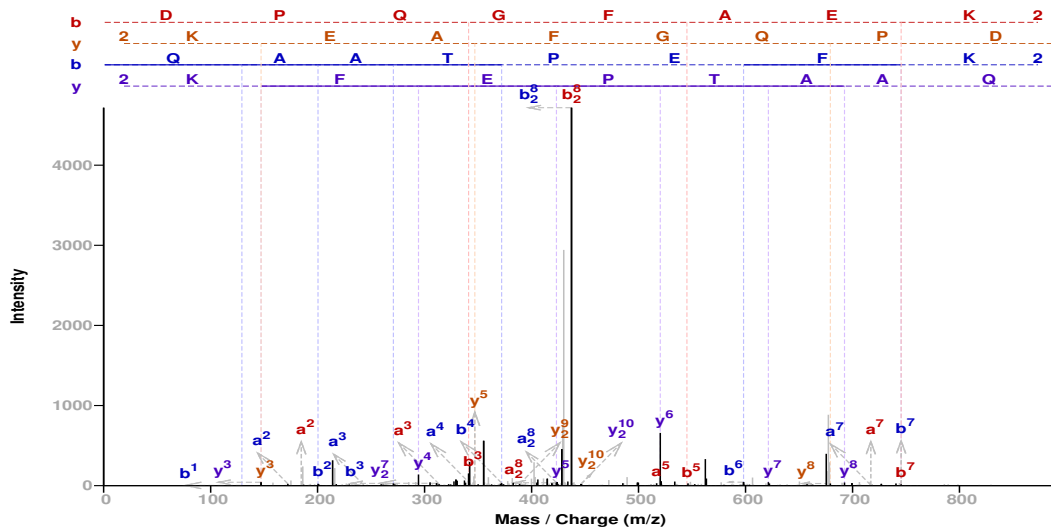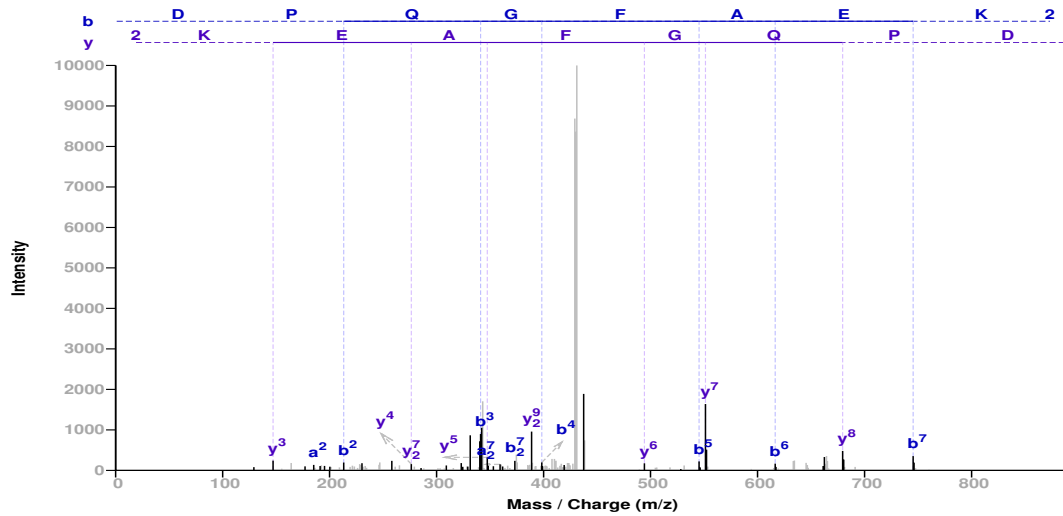

yeast01\_Scan\_Number\_7281 Precursor m/z: 484.289 cosine: 0.798  $\alpha$ : 0.439

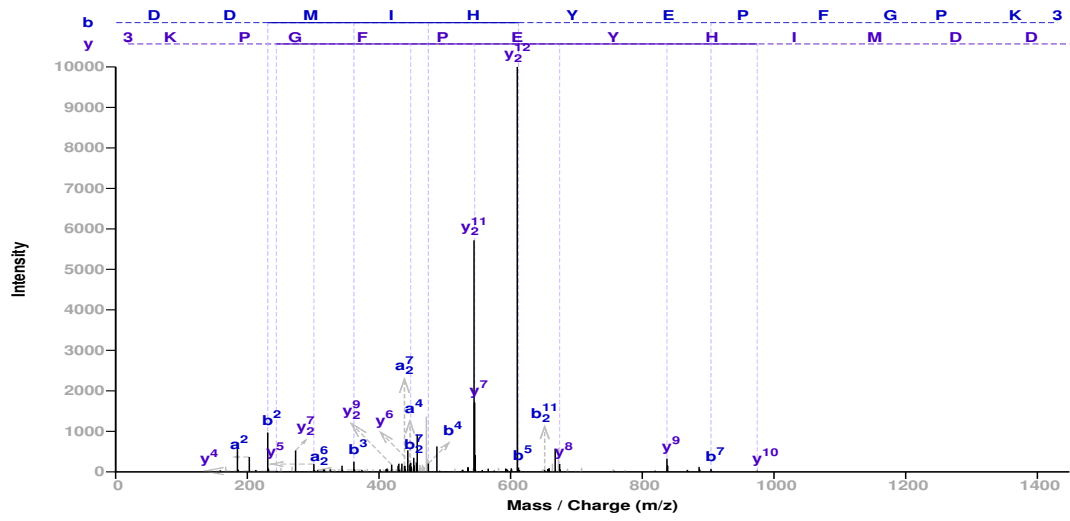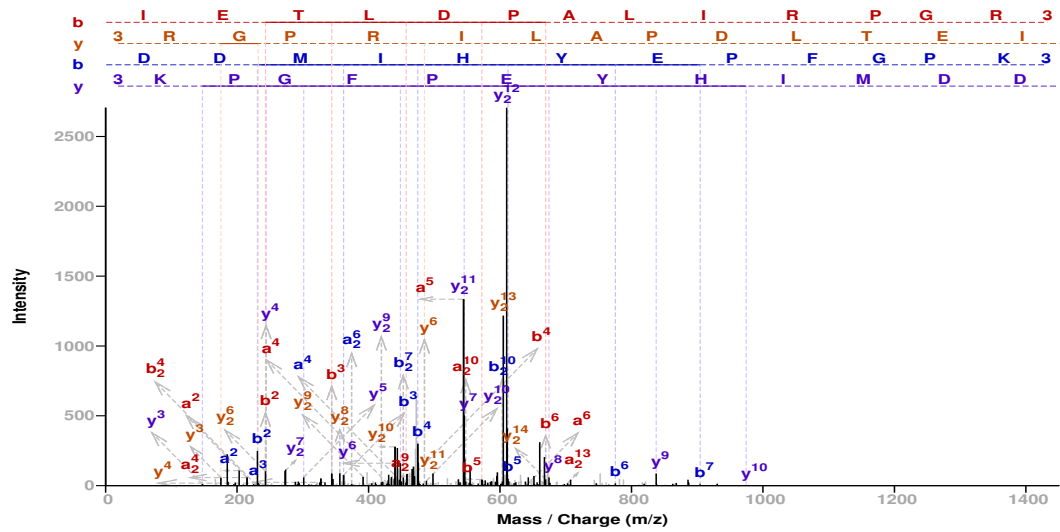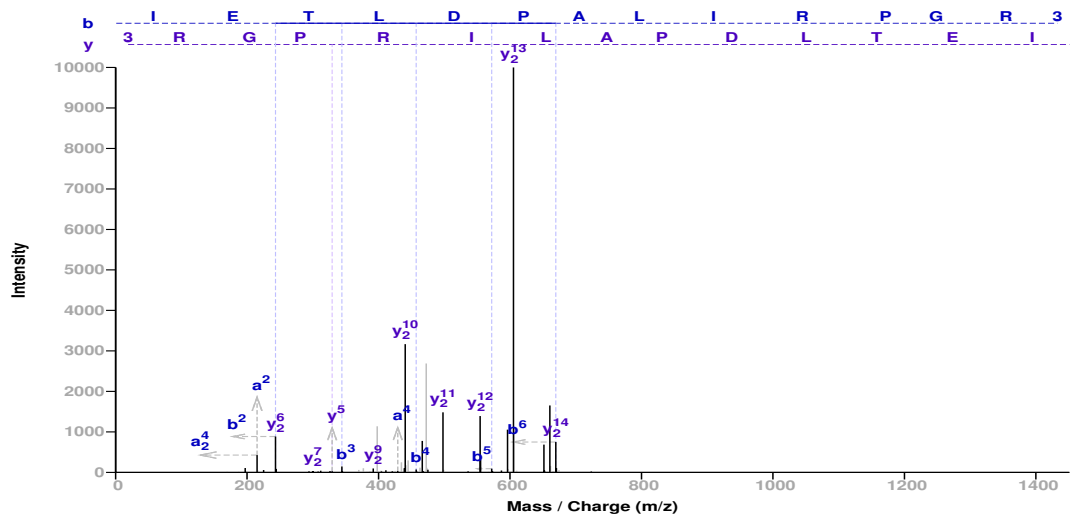



yeast01\_Scan\_Number\_3332 Precursor m/z: 447.280 cosine: 0.774  $\alpha$ : 0.439

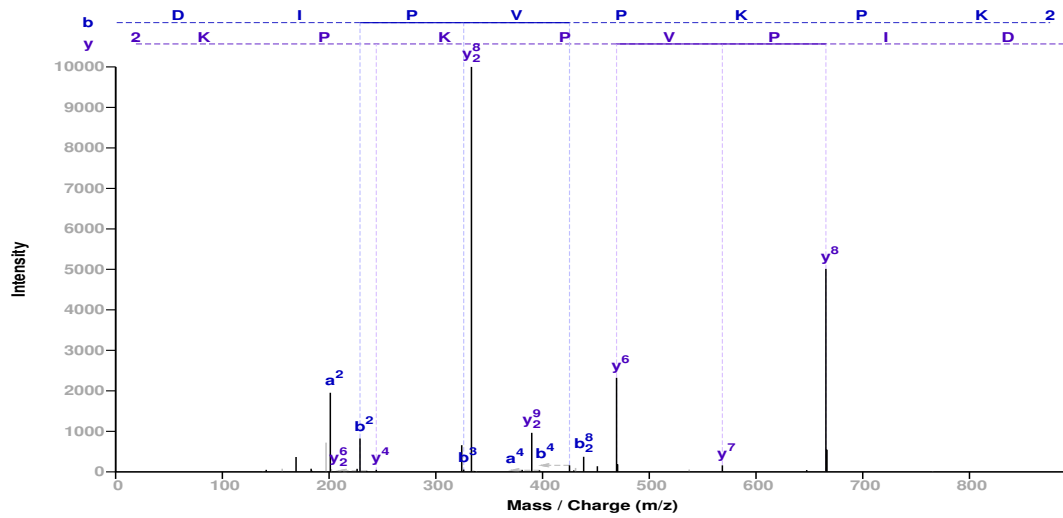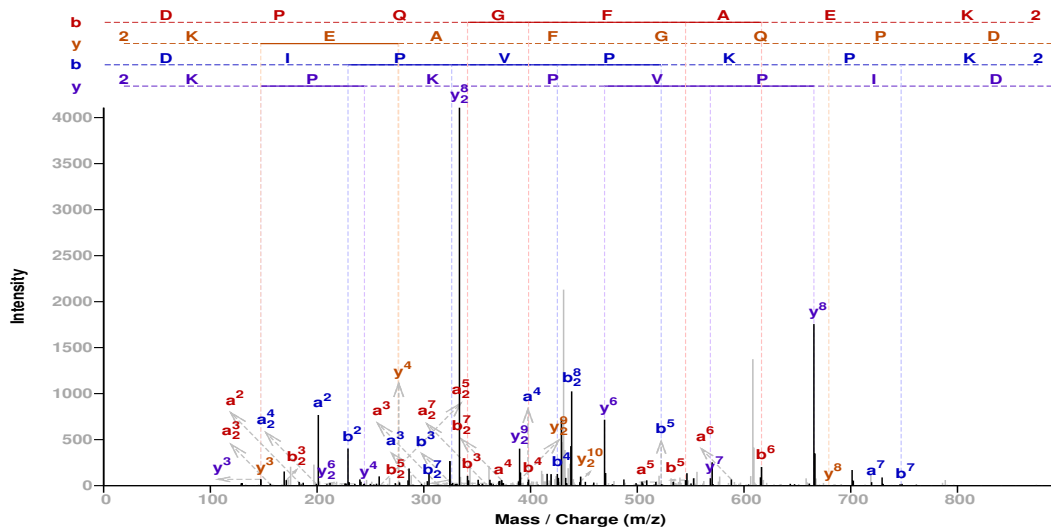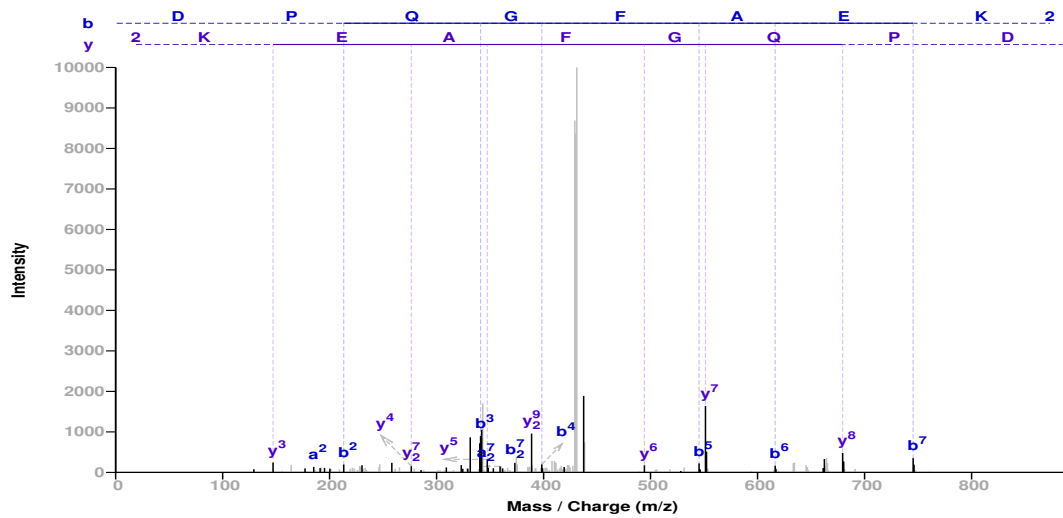



yeast01\_Scan\_Number\_7708 Precursor m/z: 446.762 cosine: 0.863  $\alpha$ : 0.436

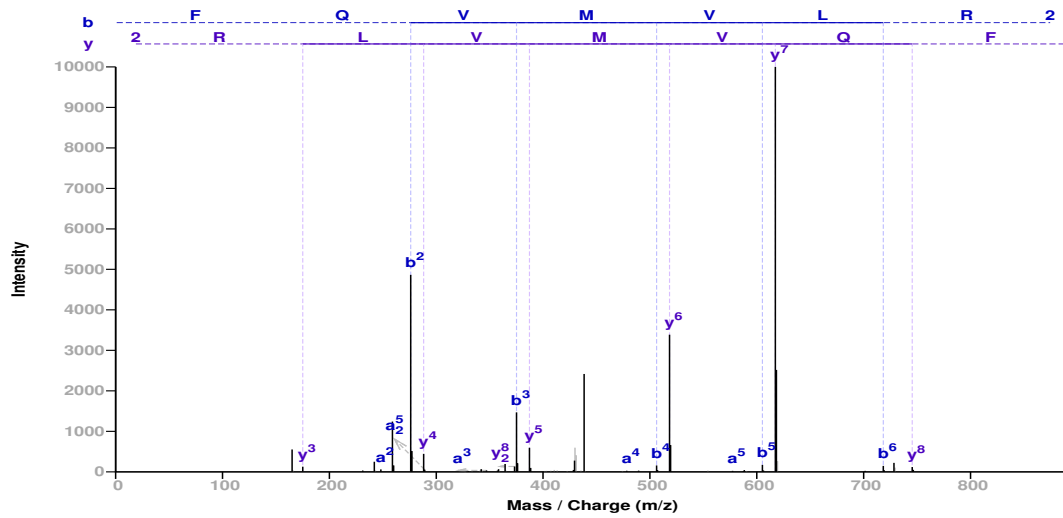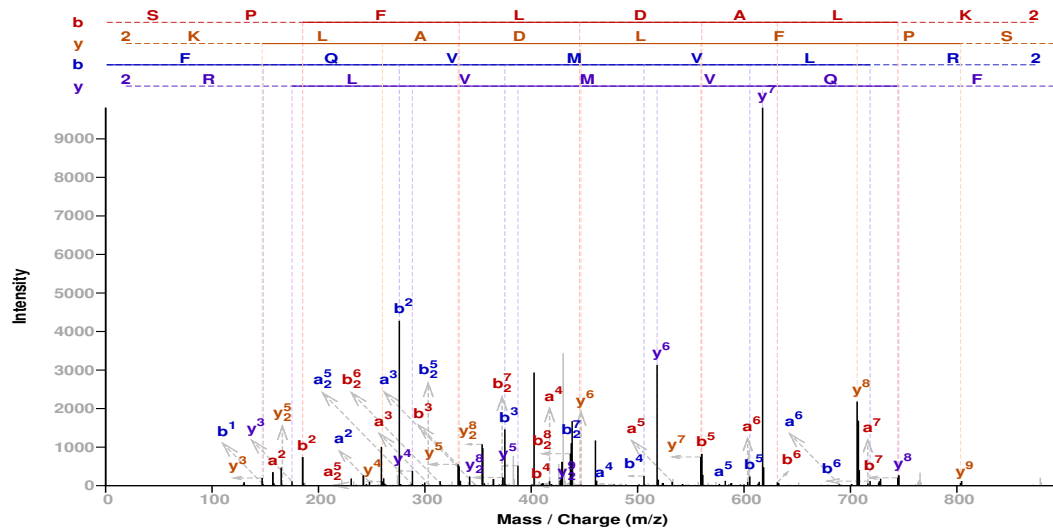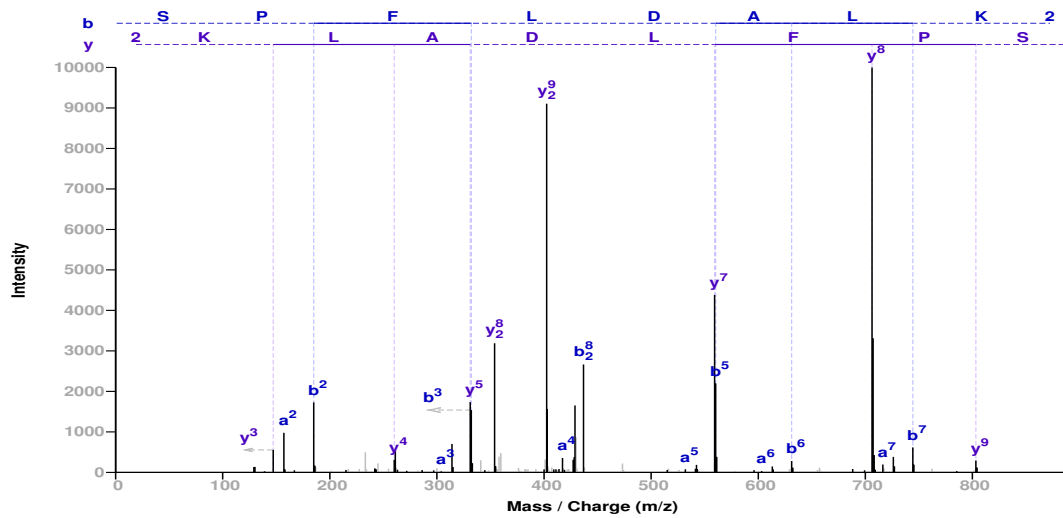

yeast01.Scan\_Number\_2511 Precursor m/z: 417.562 cosine: 0.826  $\alpha$ : 0.433

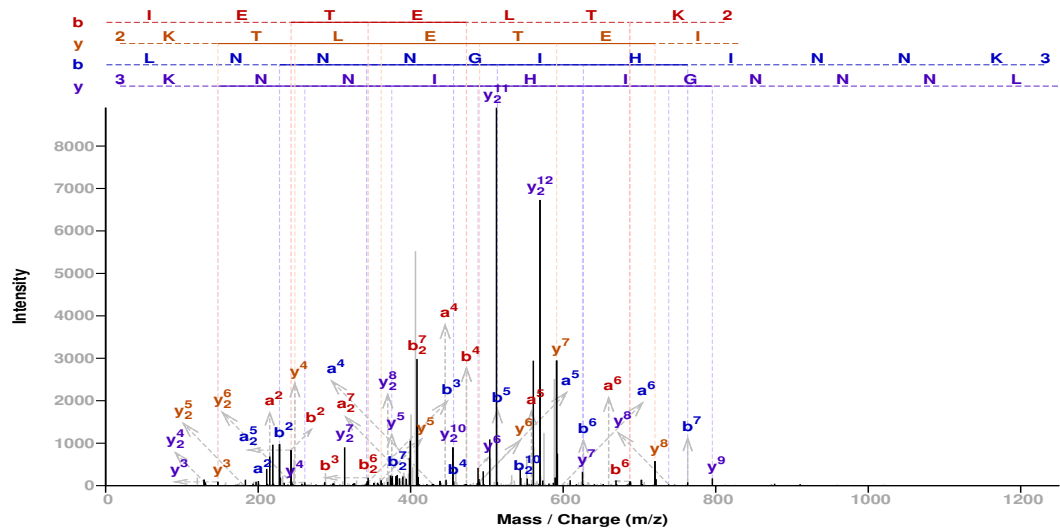

yeast01\_Scan\_Number\_4102 Precursor m/z: 455.248 cosine: 0.837  $\alpha$ : 0.427

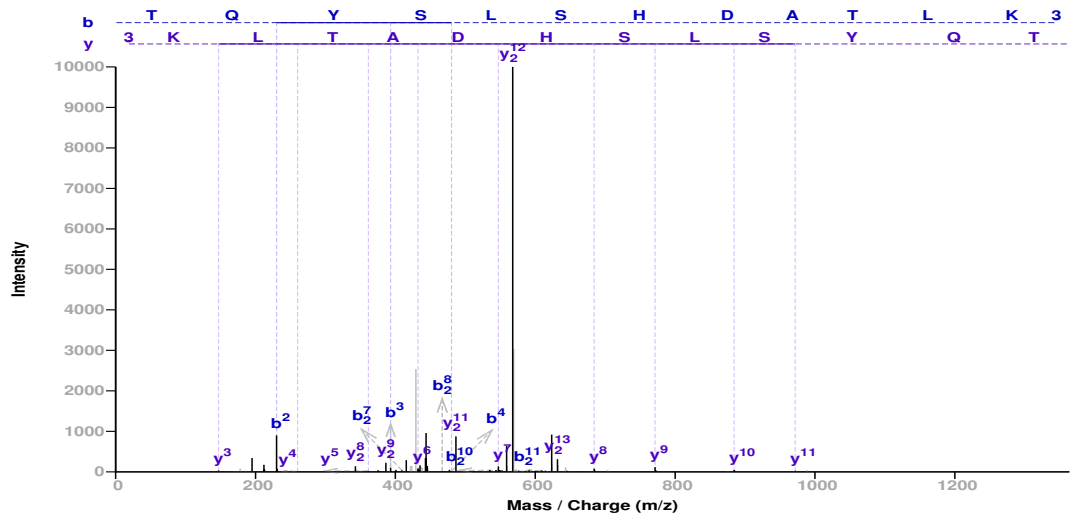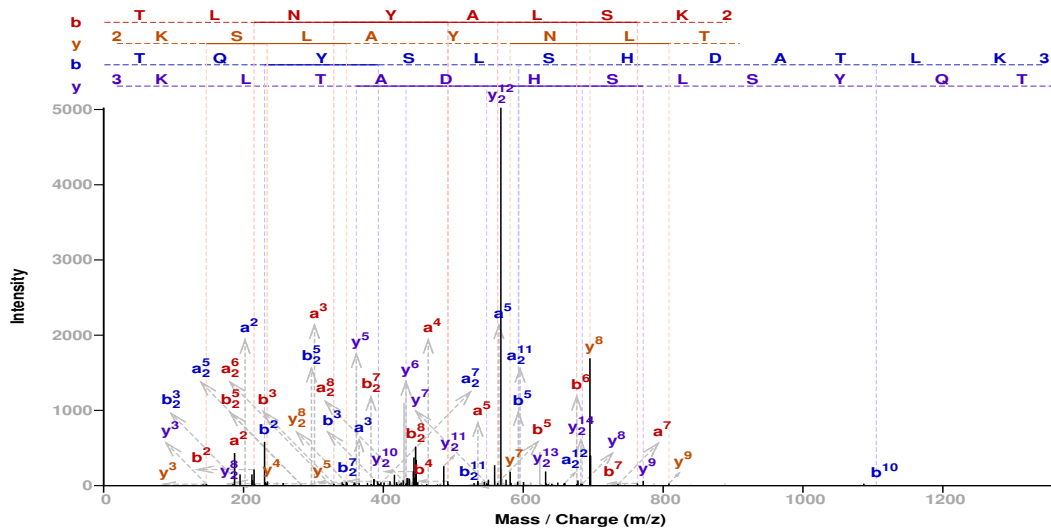

yeast01\_Scan\_Number\_5953 Precursor m/z: 497.605 cosine: 0.806  $\alpha$ : 0.426

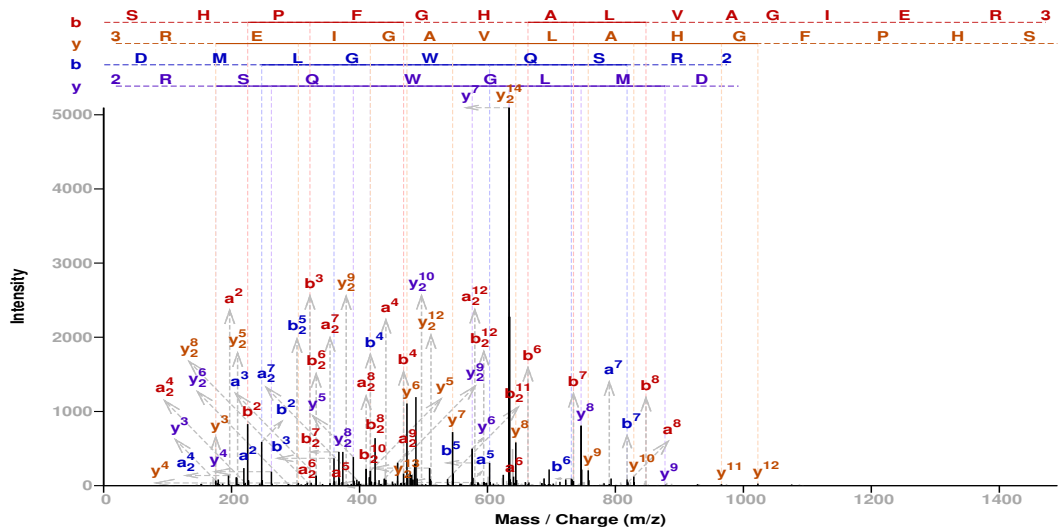

yeast01\_Scan\_Number\_5883 Precursor m/z: 709.883 cosine: 0.862  $\alpha$ : 0.417

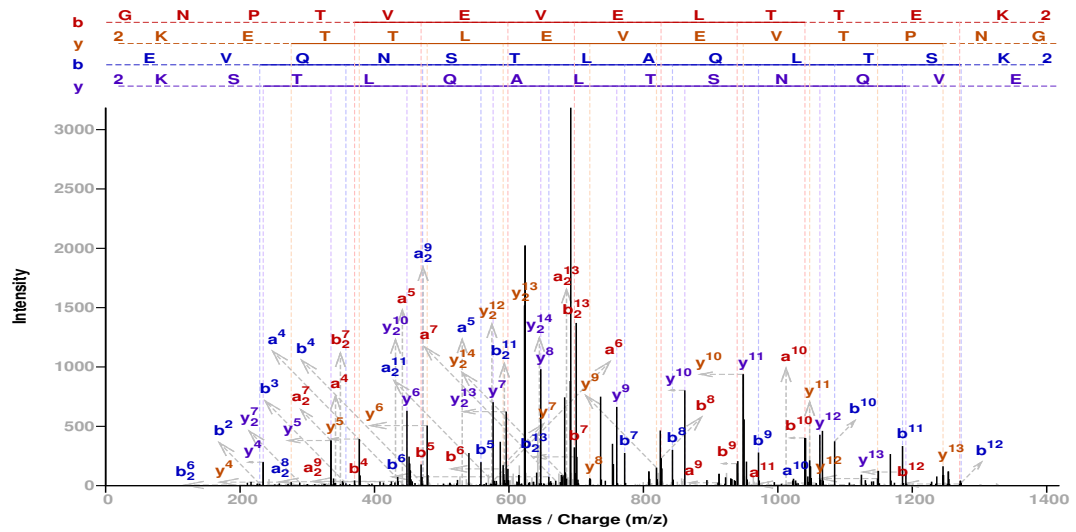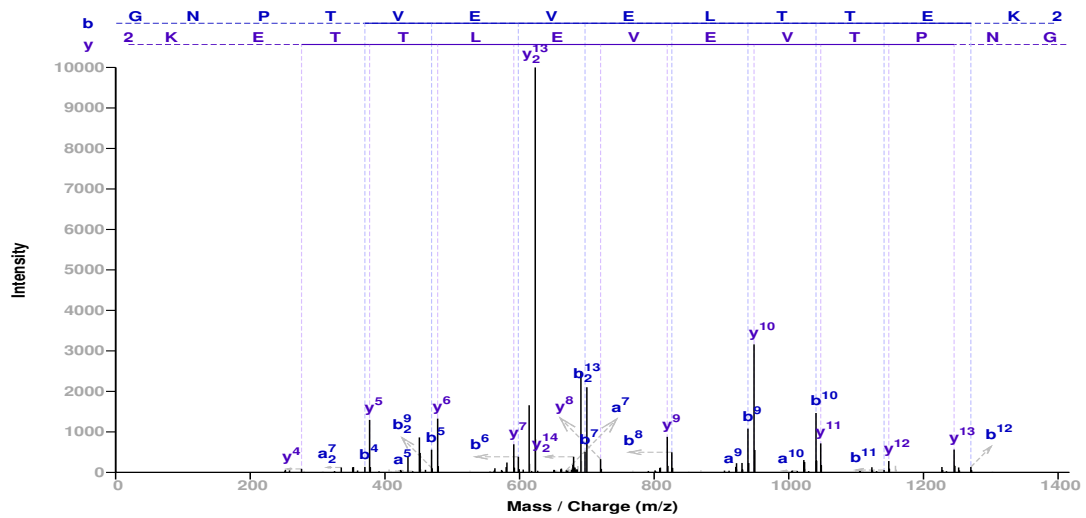

yeast01\_Scan\_Number\_4225 Precursor m/z: 468.748 cosine: 0.812  $\alpha$ : 0.412

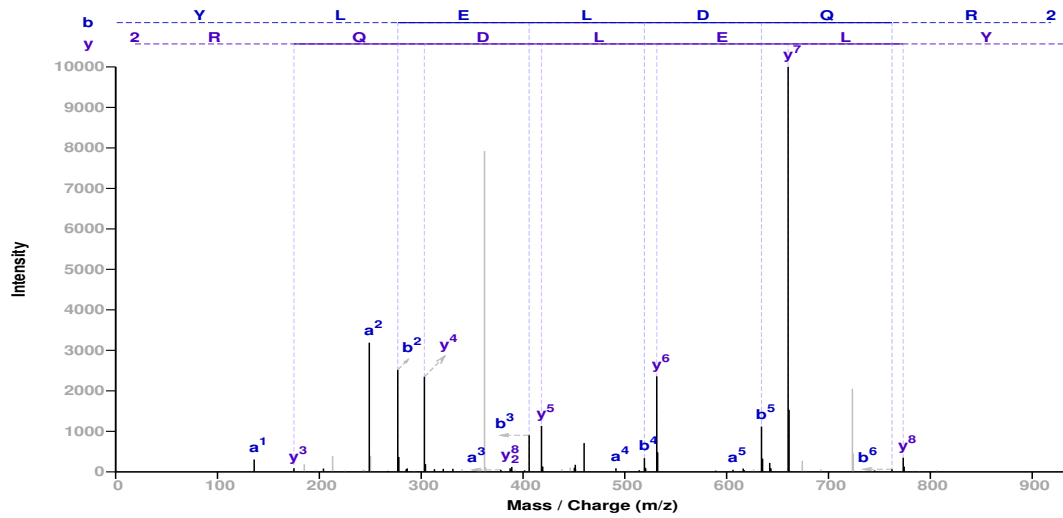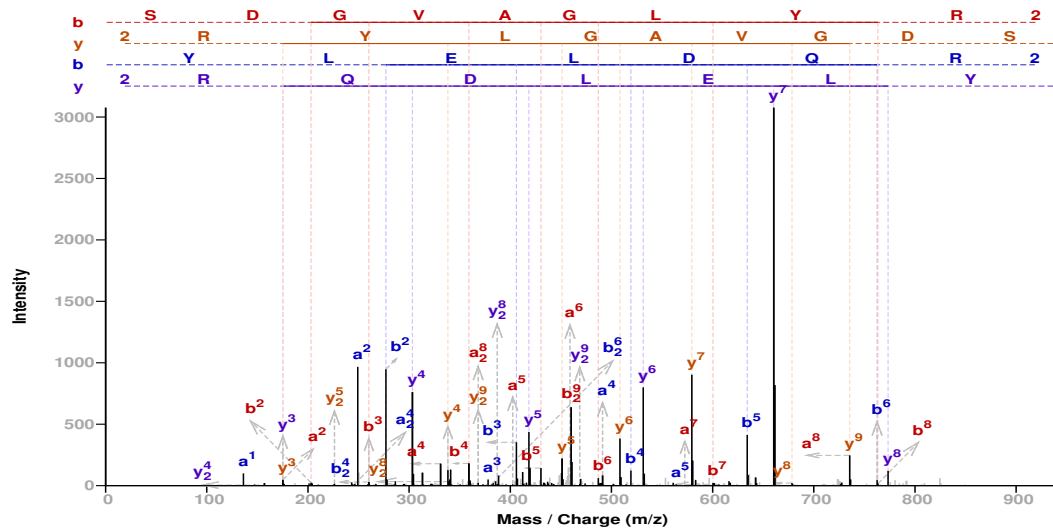



yeast01\_Scan\_Number\_5441 Precursor m/z: 462.228 cosine: 0.778  $\alpha$ : 0.408

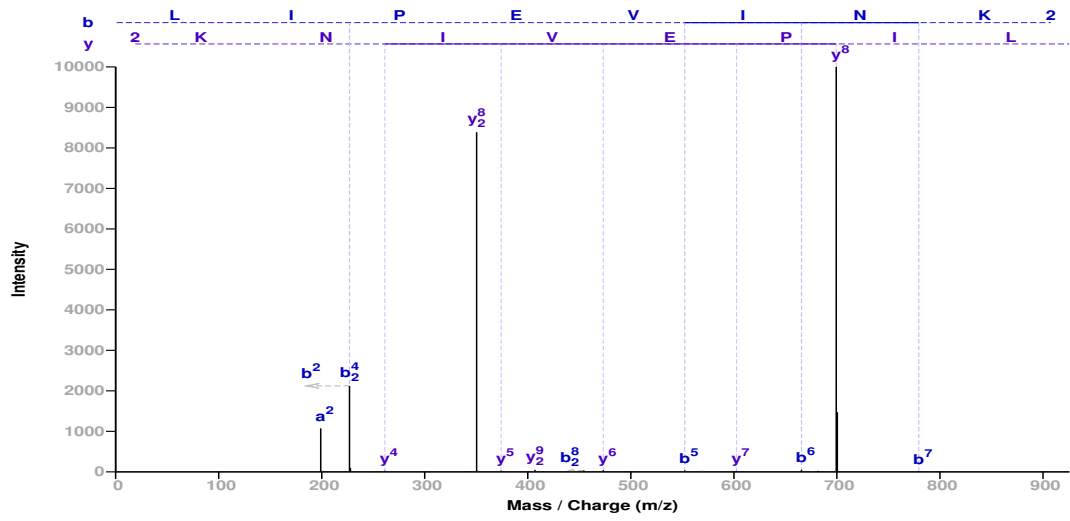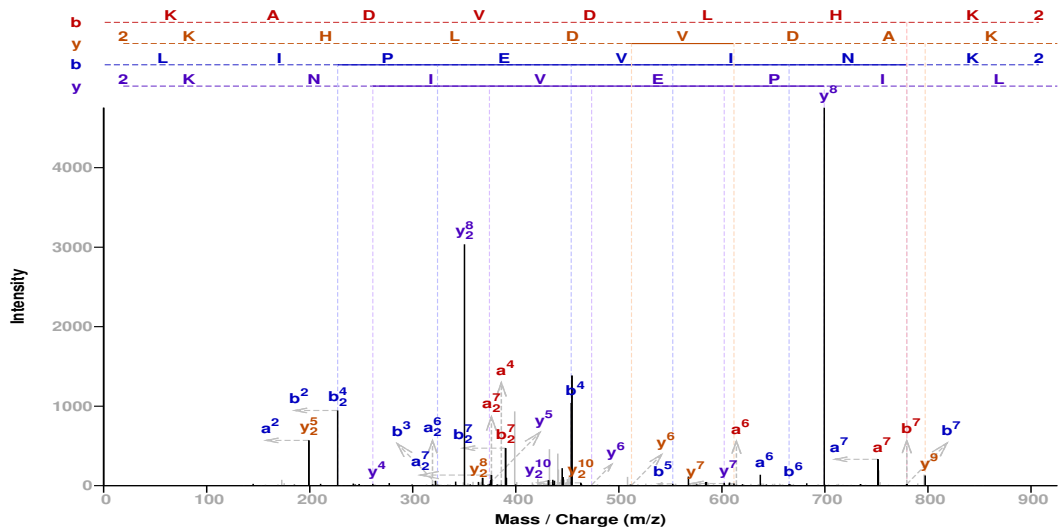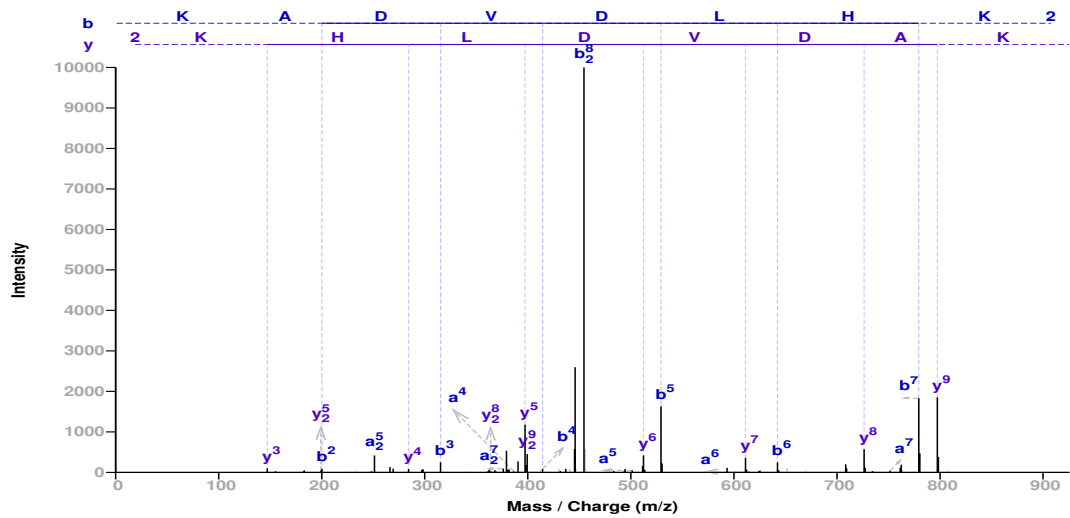

yeast01\_Scan\_Number\_6645 Precursor m/z: 598.878 cosine: 0.751  $\alpha$ : 0.408

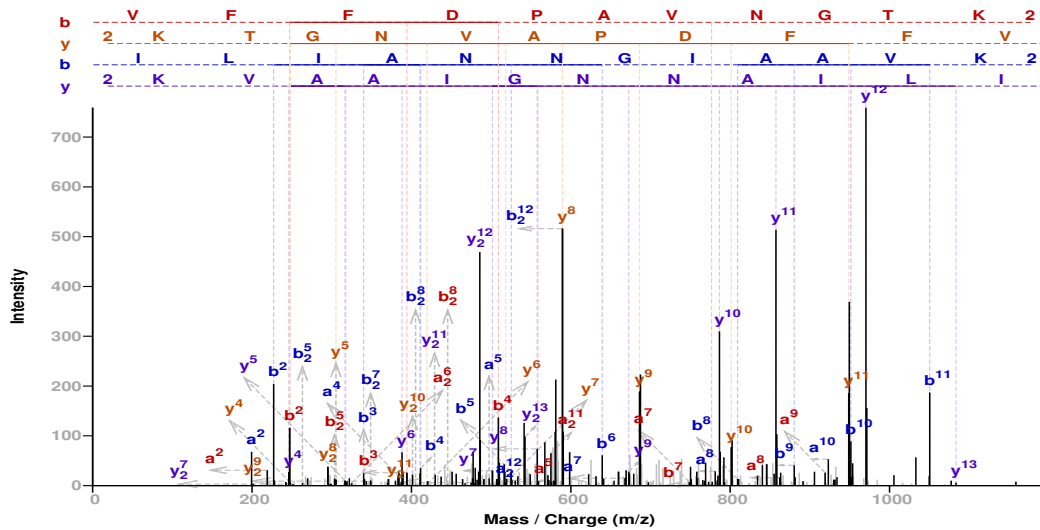

yeast01\_Scan\_Number\_2763 Precursor m/z: 385.225 cosine: 0.804  $\alpha$ : 0.407

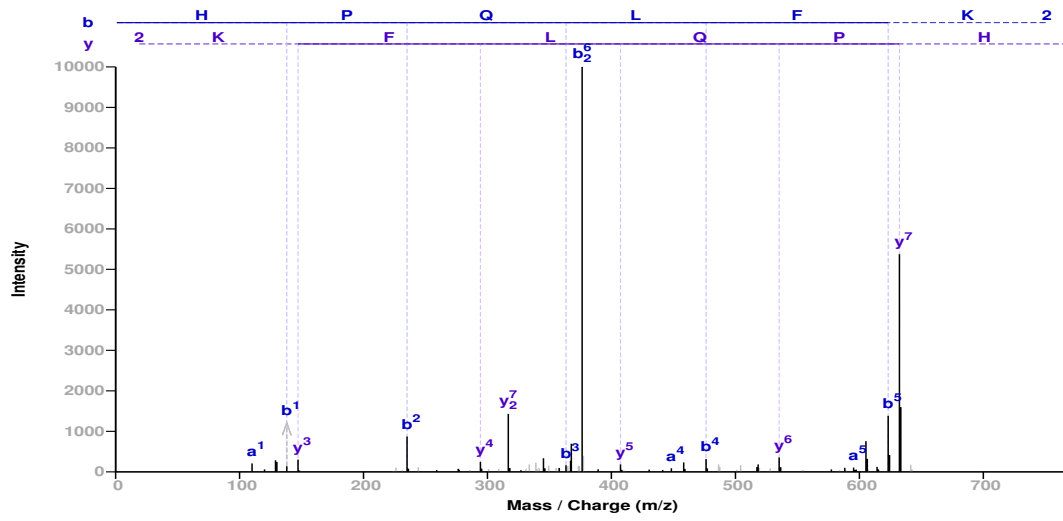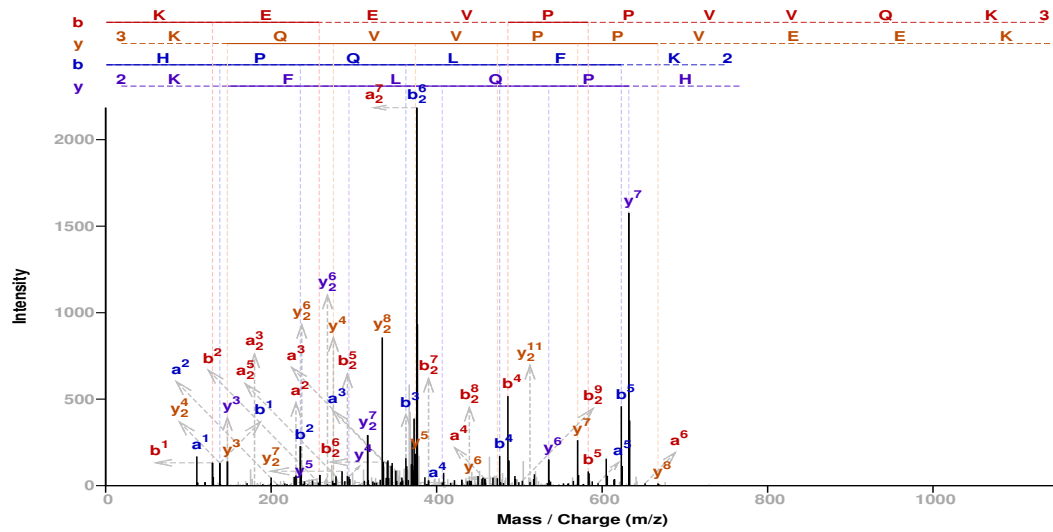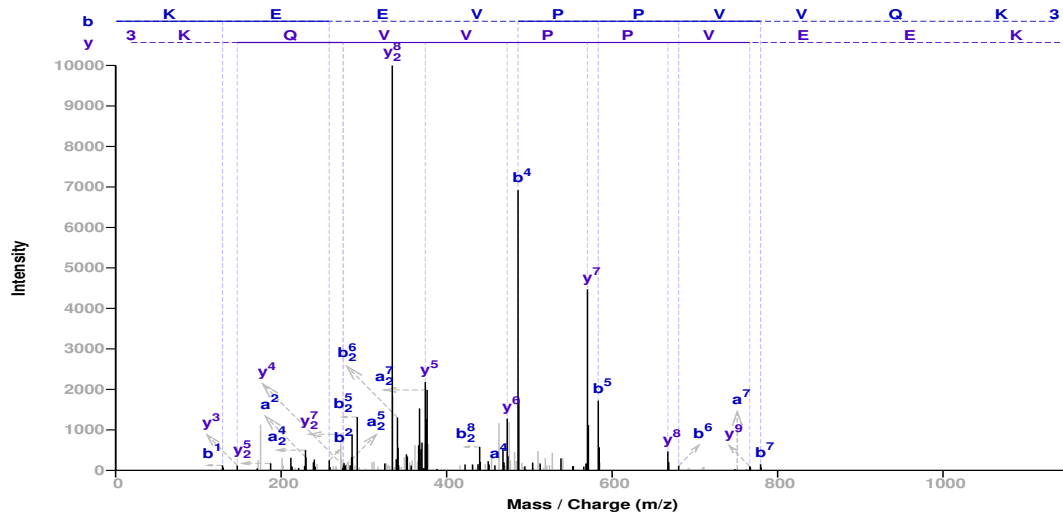

yeast01\_Scan\_Number\_4744 Precursor m/z: 444.764 cosine: 0.926  $\alpha$ : 0.398

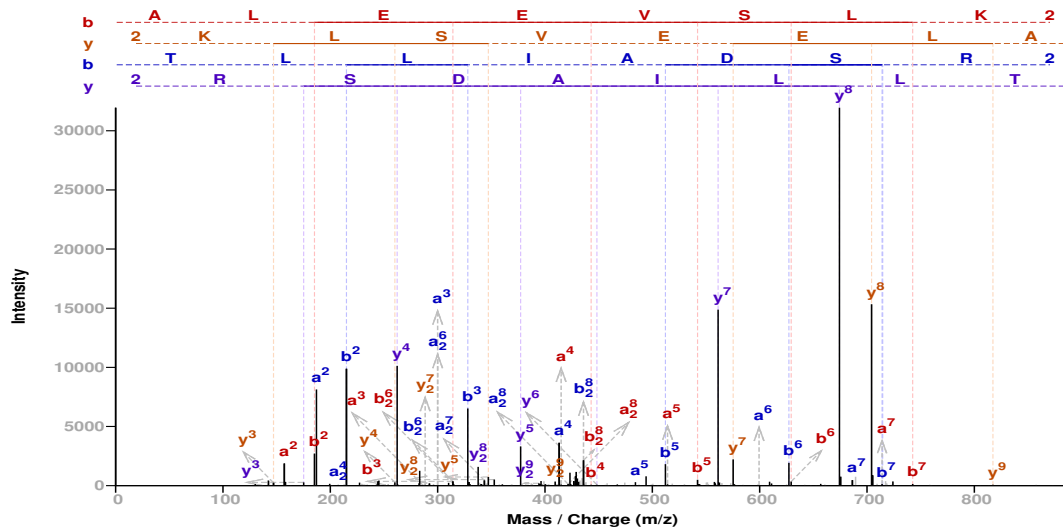

yeast01\_Scan\_Number\_9814 Precursor m/z: 526.282 cosine: 0.846  $\alpha$ : 0.397

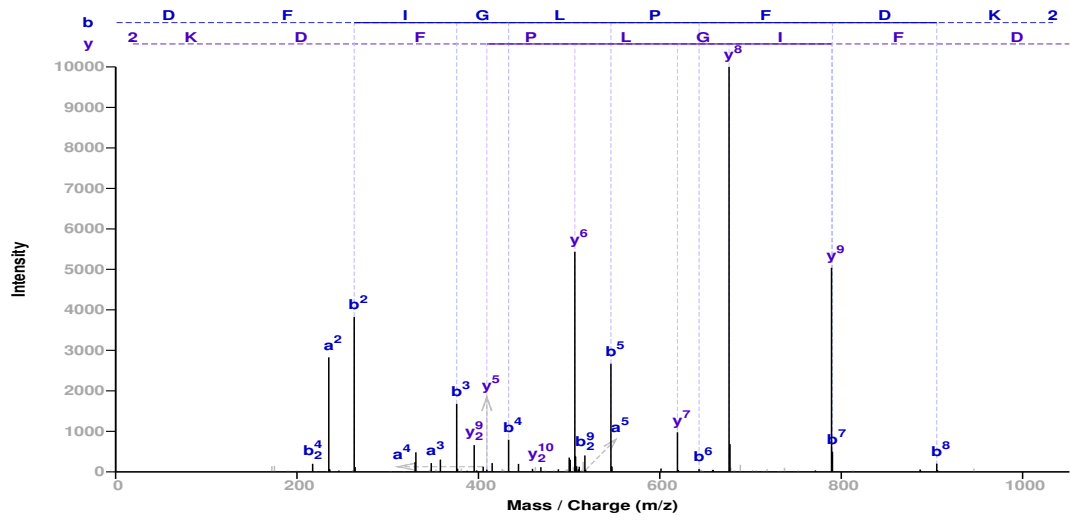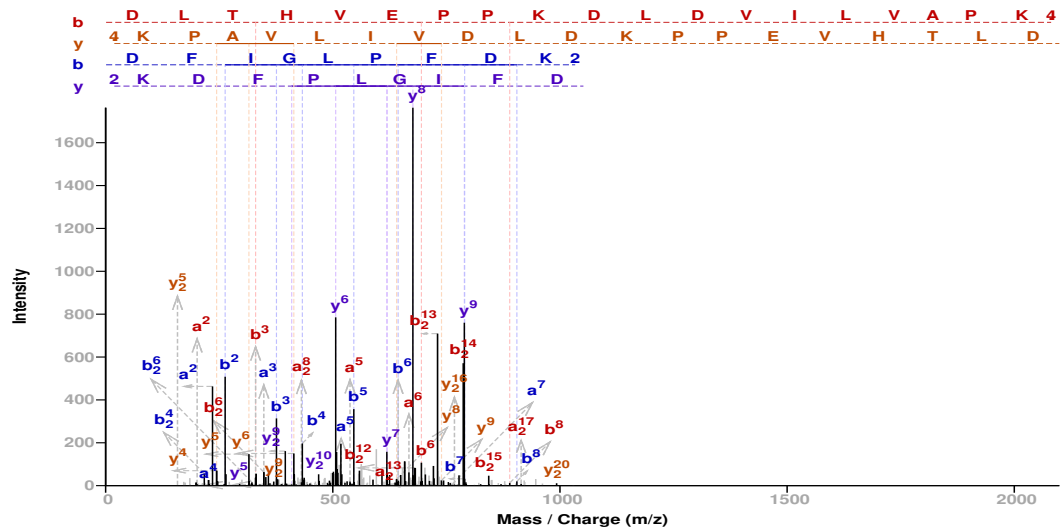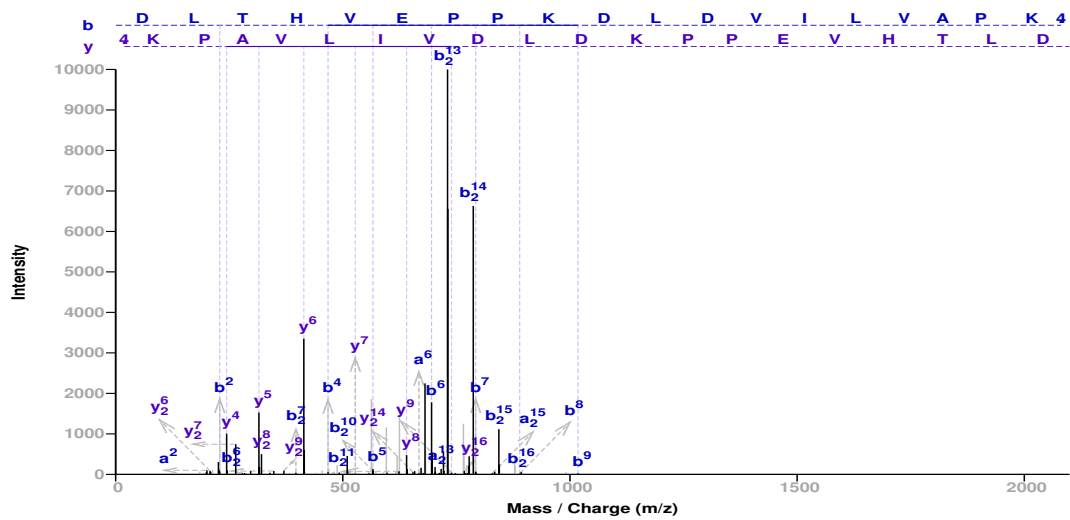

yeast01\_Scan\_Number\_8027 Precursor m/z: 548.994 cosine: 0.789  $\alpha$ : 0.397

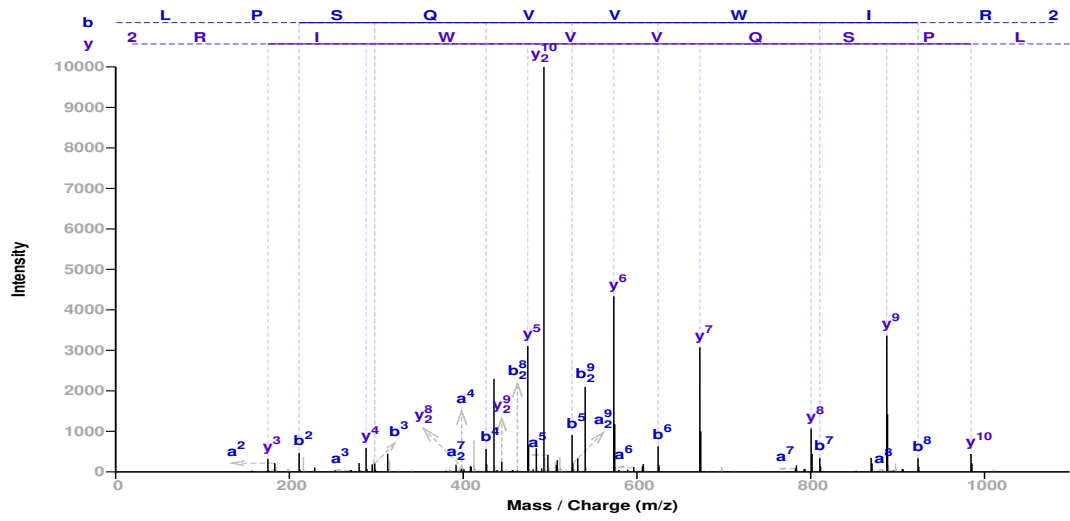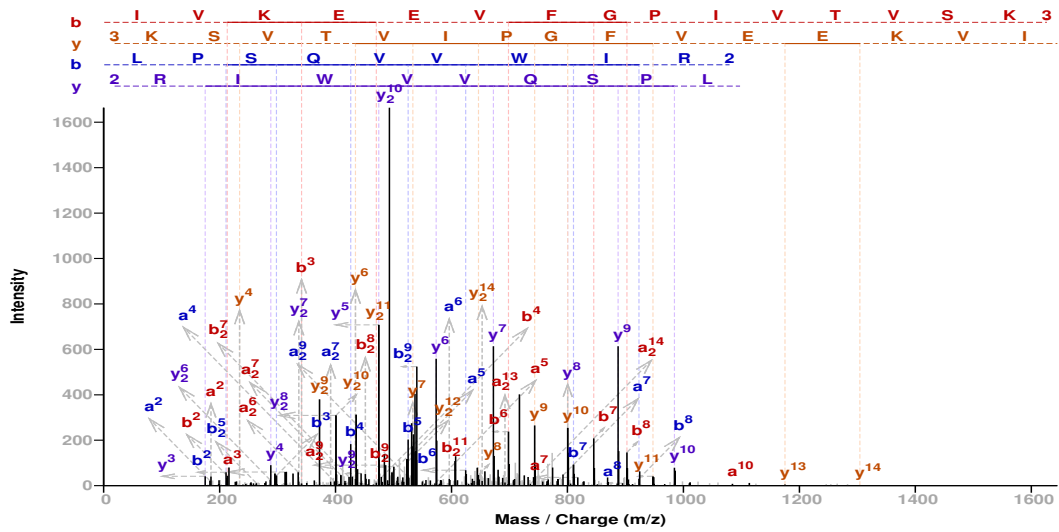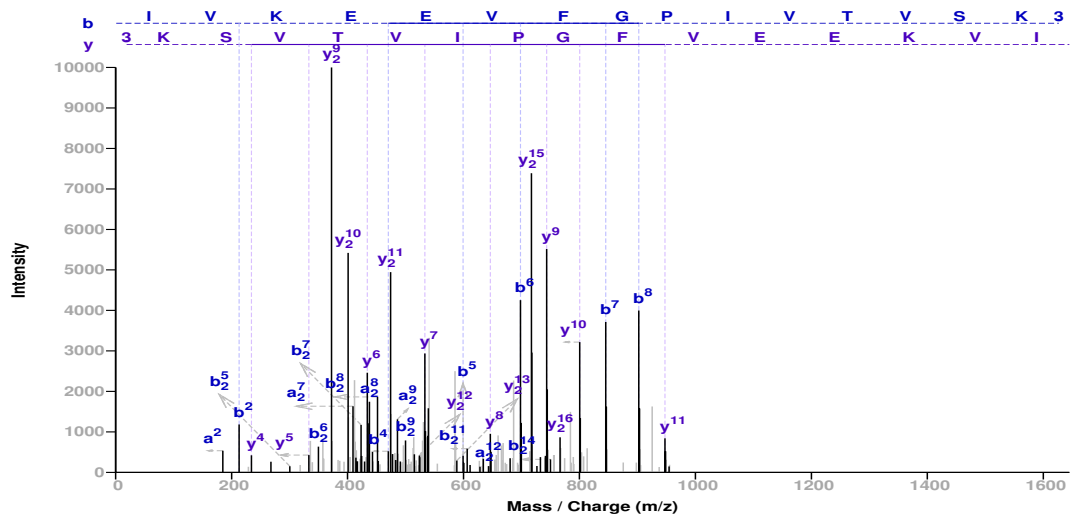



yeast01\_Scan\_Number\_8554 Precursor m/z: 697.882 cosine: 0.791  $\alpha$ : 0.391

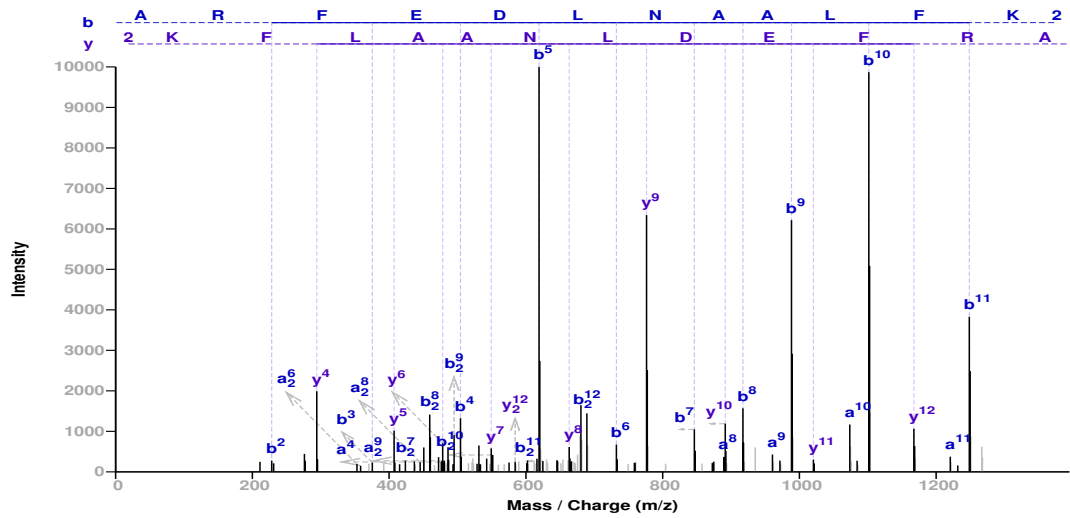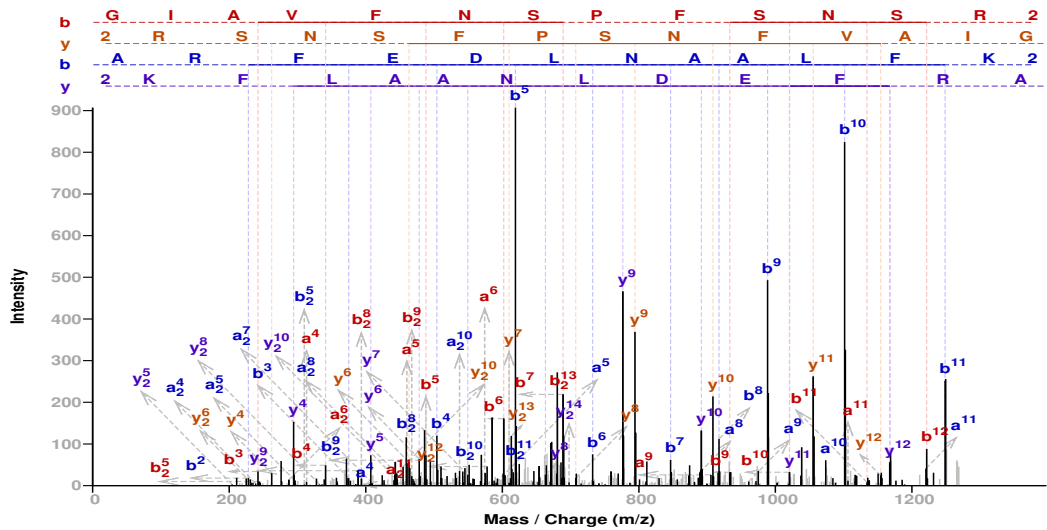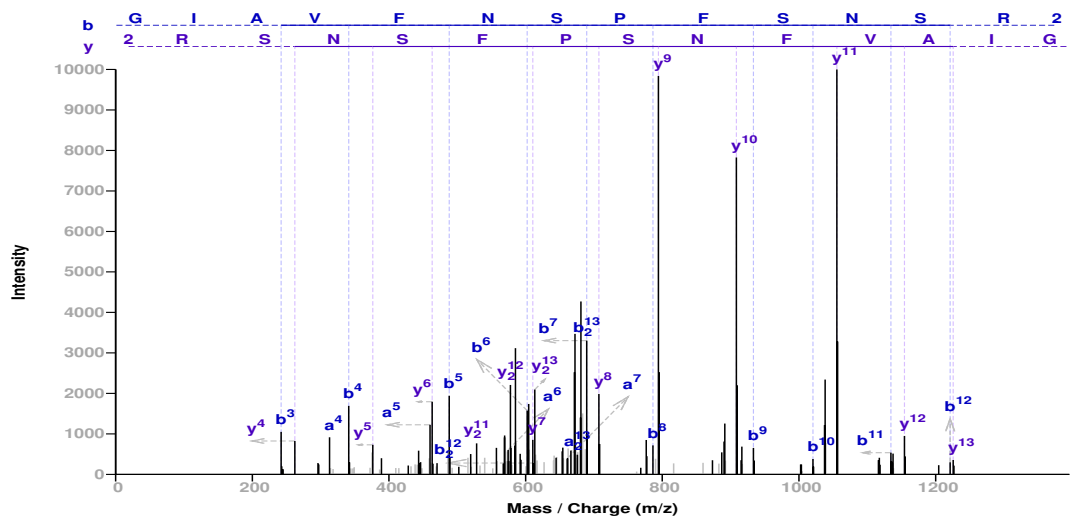



yeast01\_Scan\_Number\_7019 Precursor m/z: 443.226 cosine: 0.751  $\alpha$ : 0.390

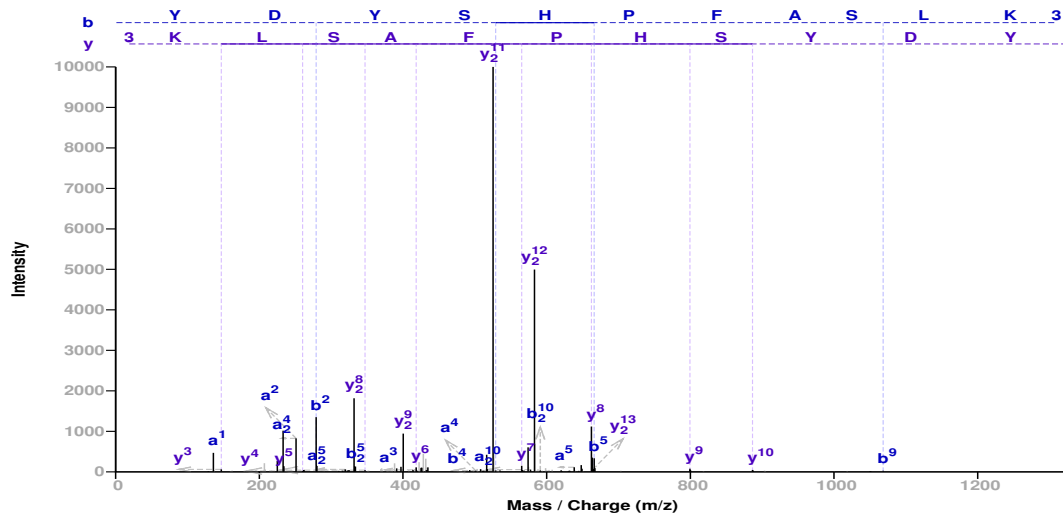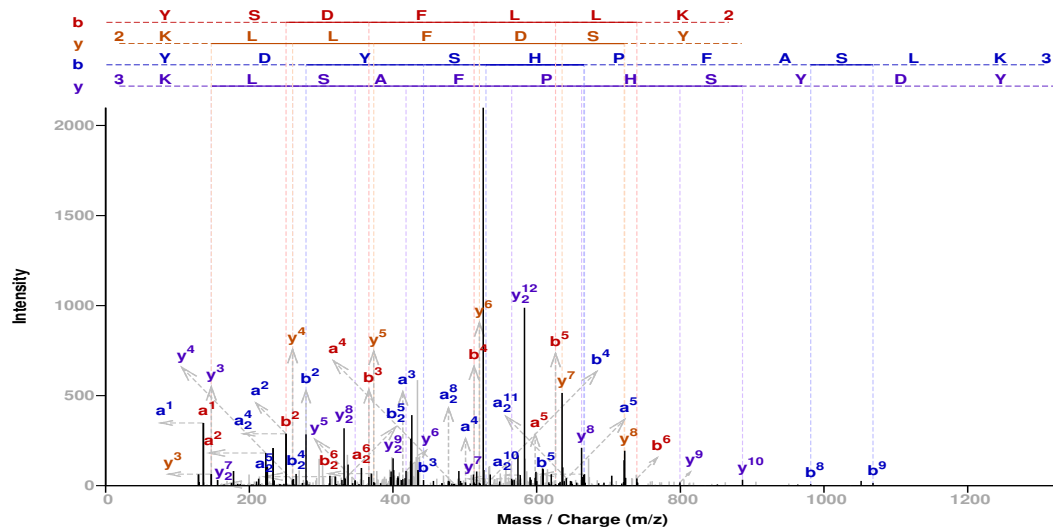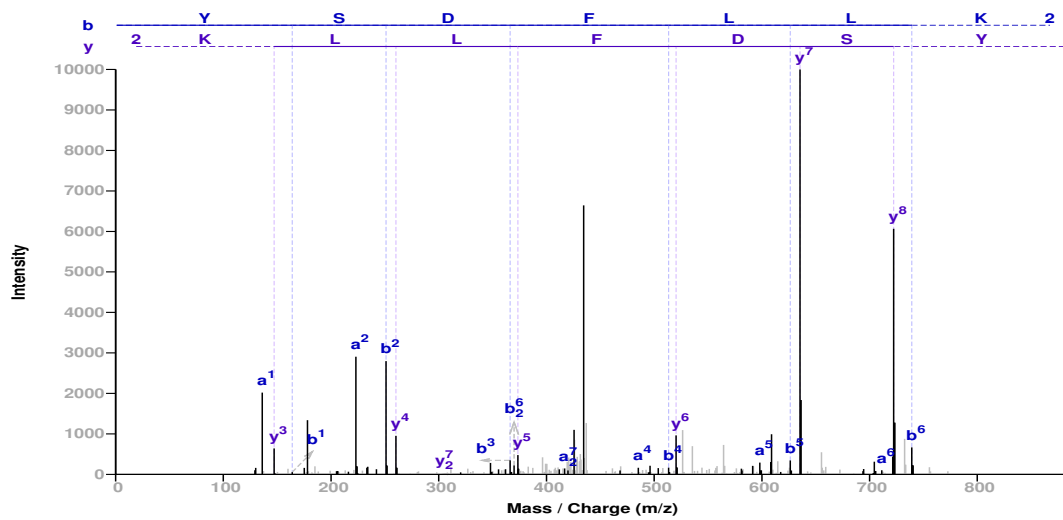

yeast01\_Scan\_Number\_3413 Precursor m/z: 489.236 cosine: 0.764  $\alpha$ : 0.390

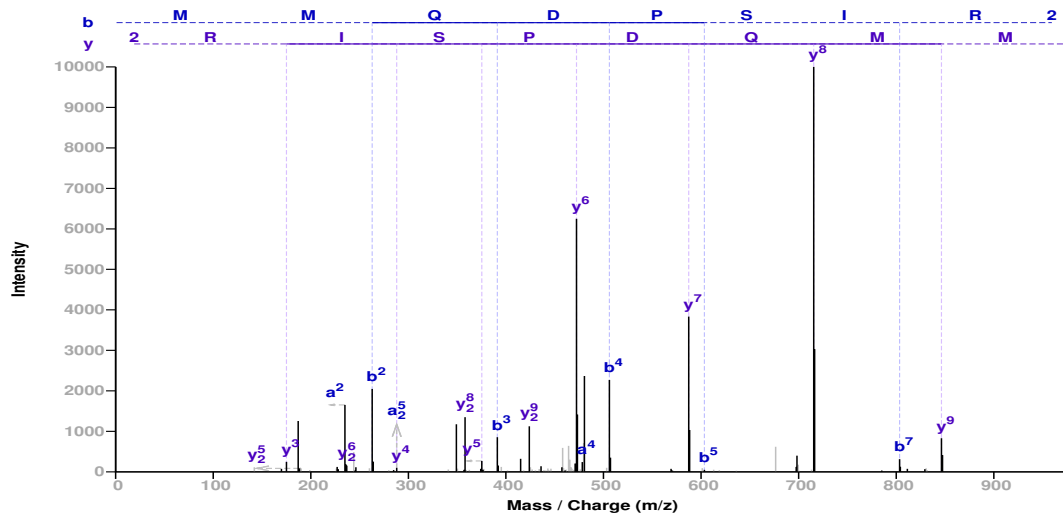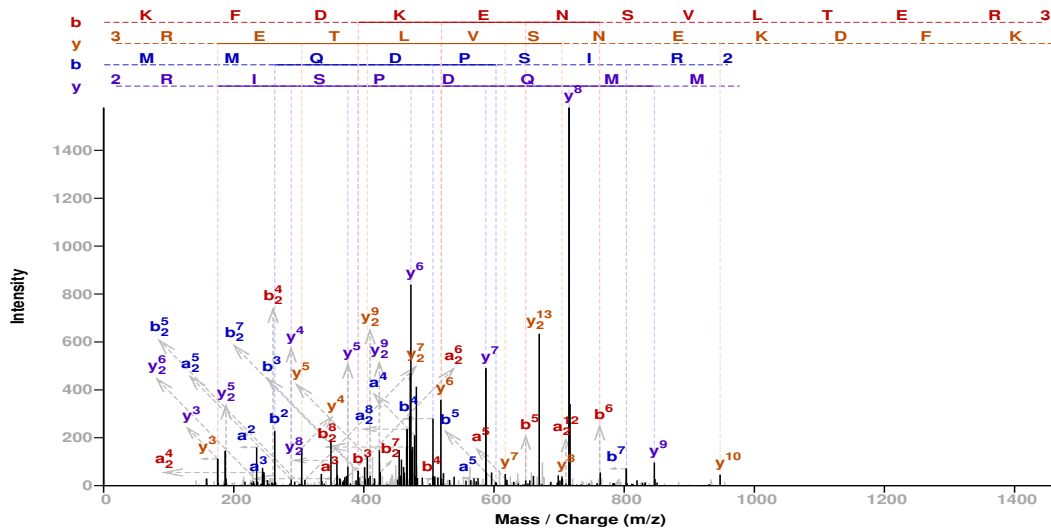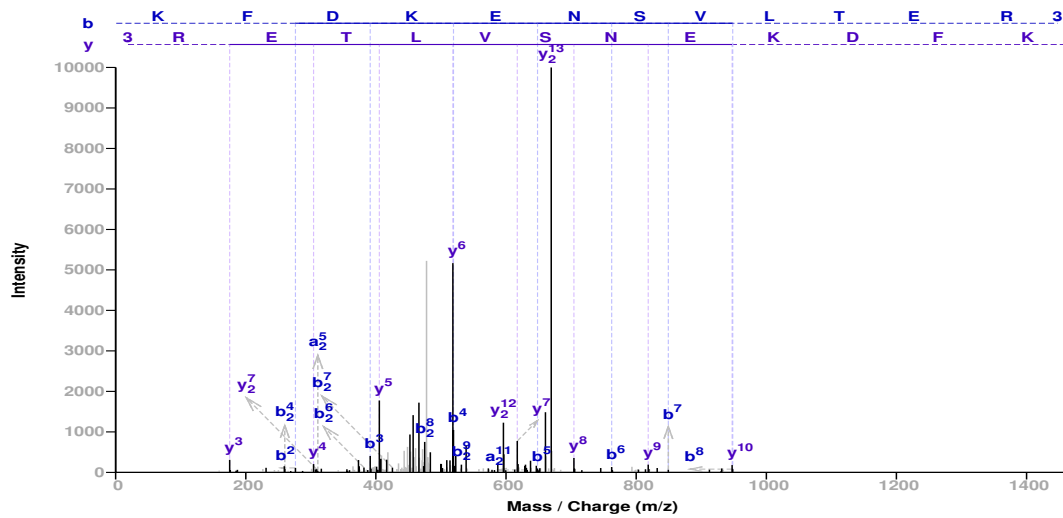

yeast01\_Scan\_Number\_4809 Precursor m/z: 418.242 cosine: 0.771  $\alpha$ : 0.389

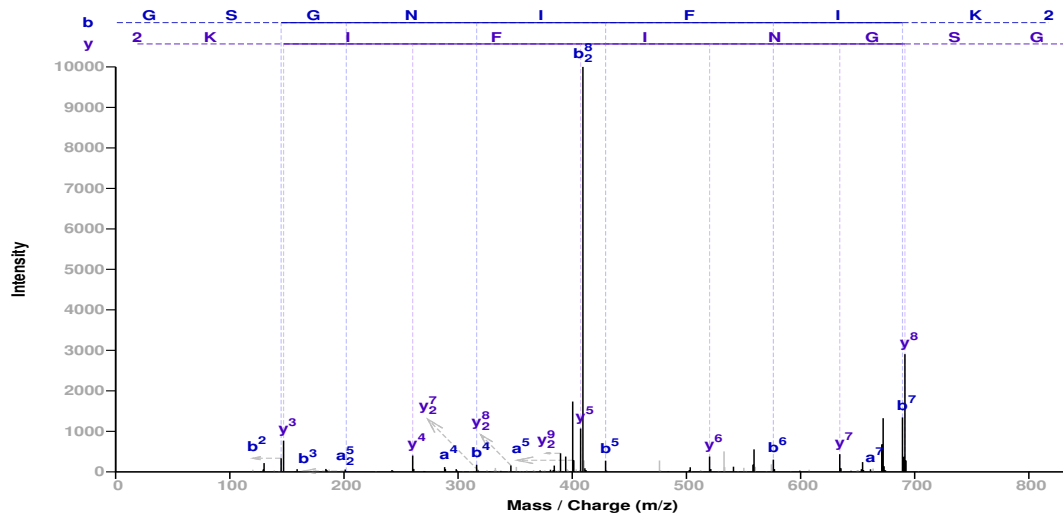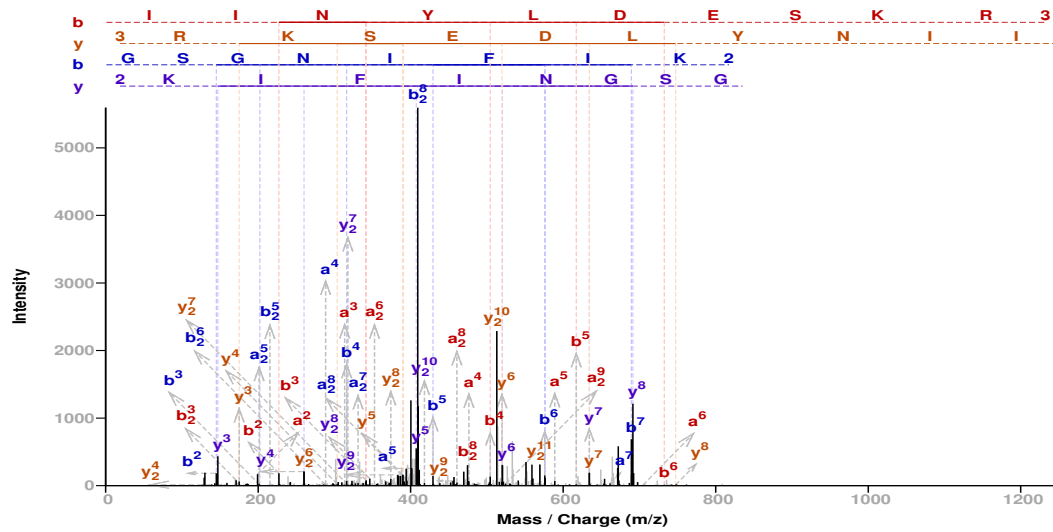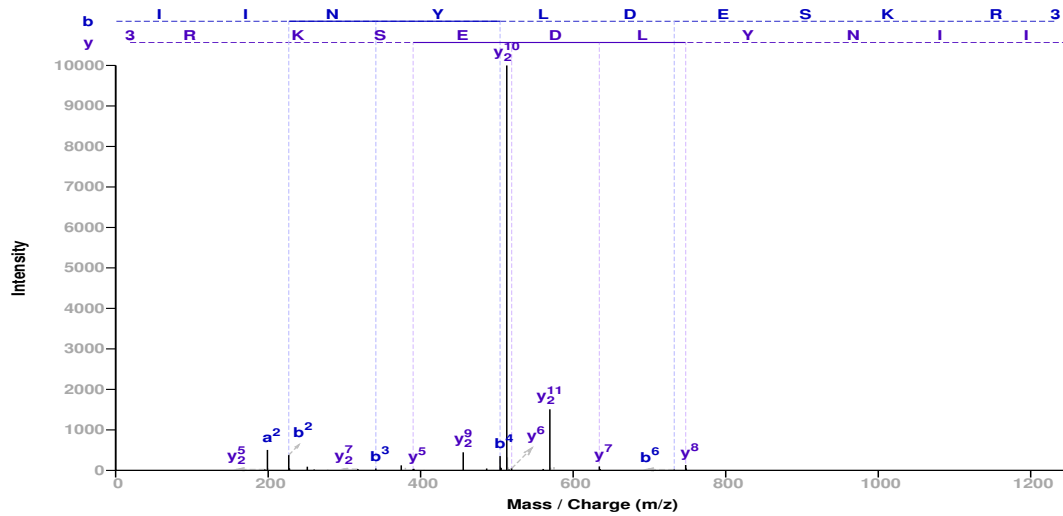

yeast01\_Scan\_Number\_946 Precursor m/z: 405.745 cosine: 0.819  $\alpha$ : 0.389

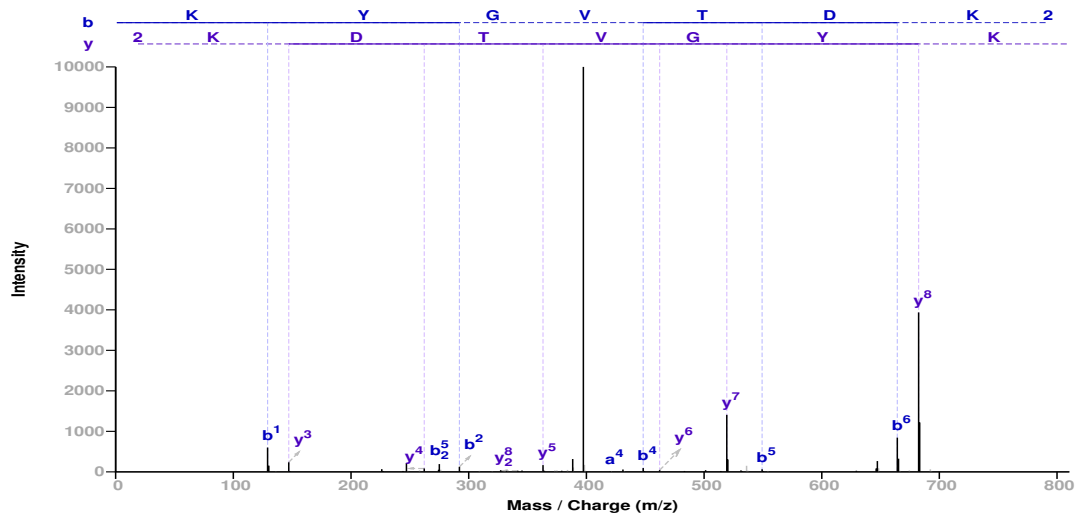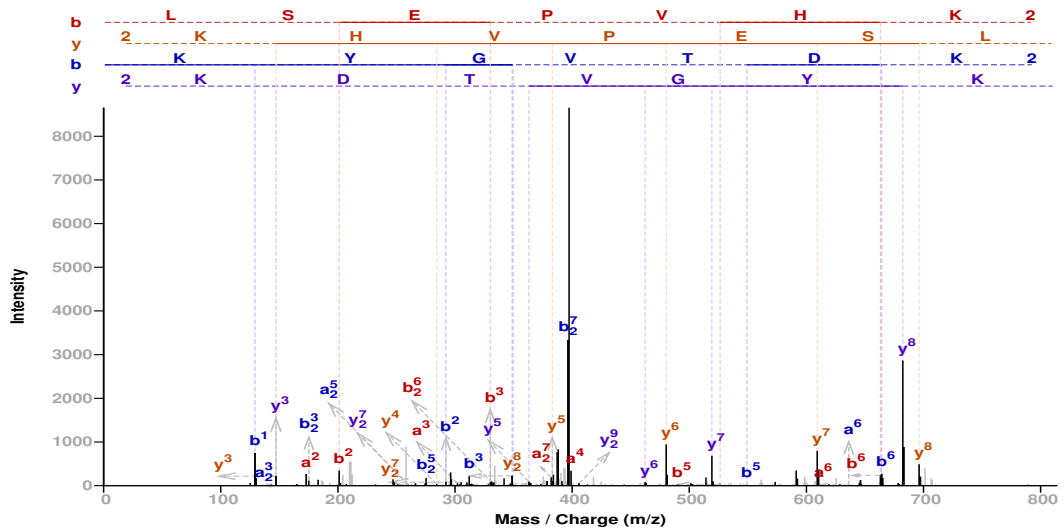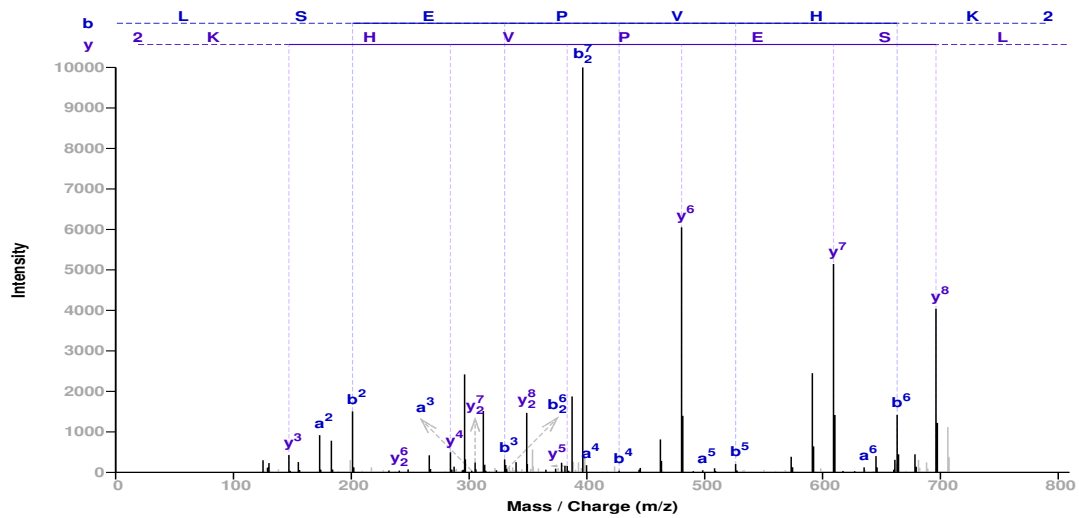

yeast01\_Scan\_Number\_3923 Precursor m/z: 571.303 cosine: 0.736  $\alpha$ : 0.388

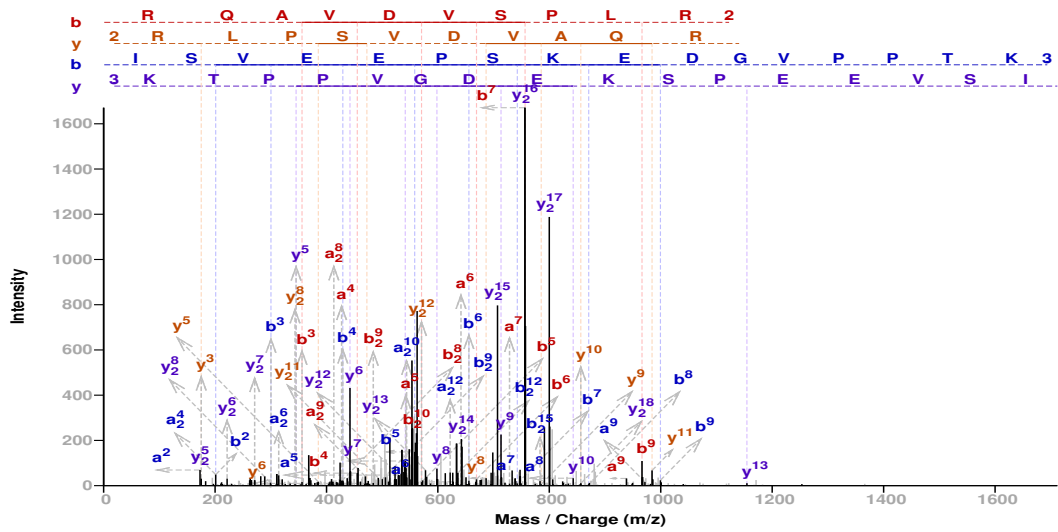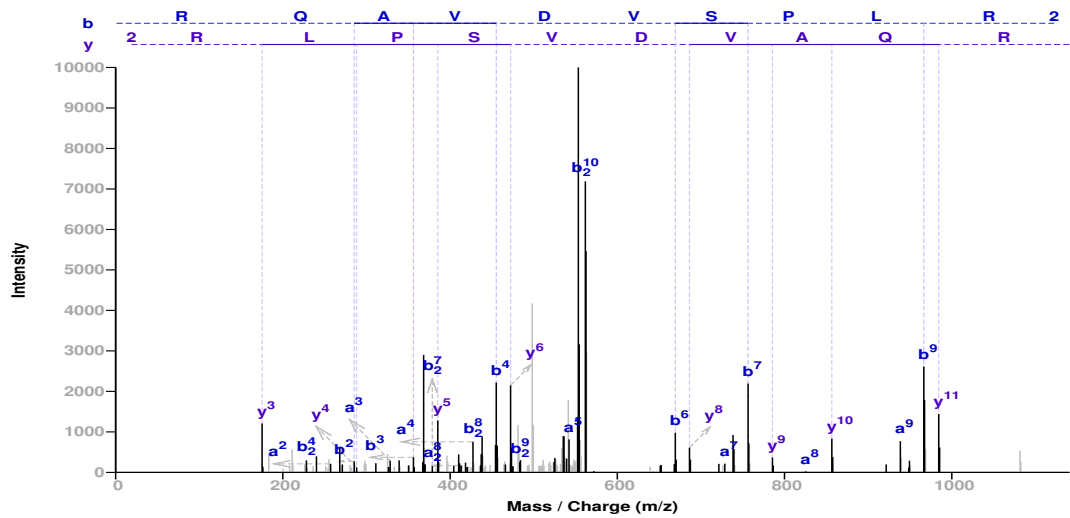

yeast01\_Scan\_Number\_1809 Precursor m/z: 411.235 cosine: 0.925  $\alpha$ : 0.385

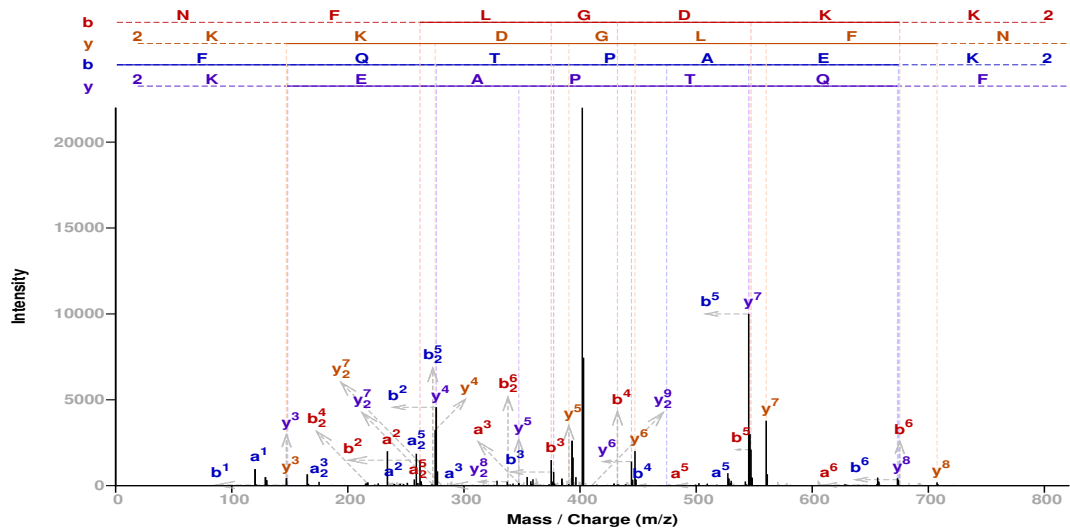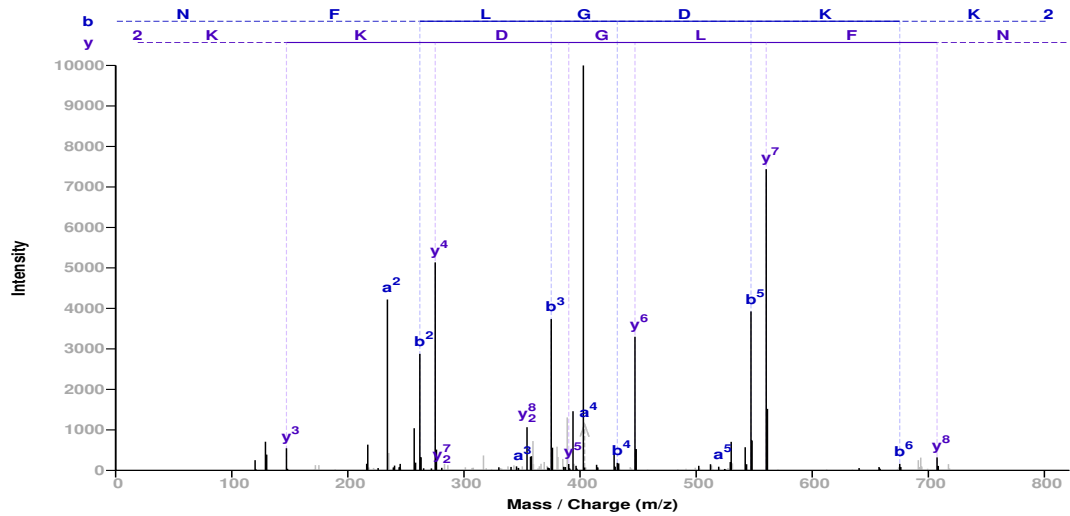

yeast01\_Scan\_Number\_5950 Precursor m/z: 394.241 cosine: 0.809  $\alpha$ : 0.383

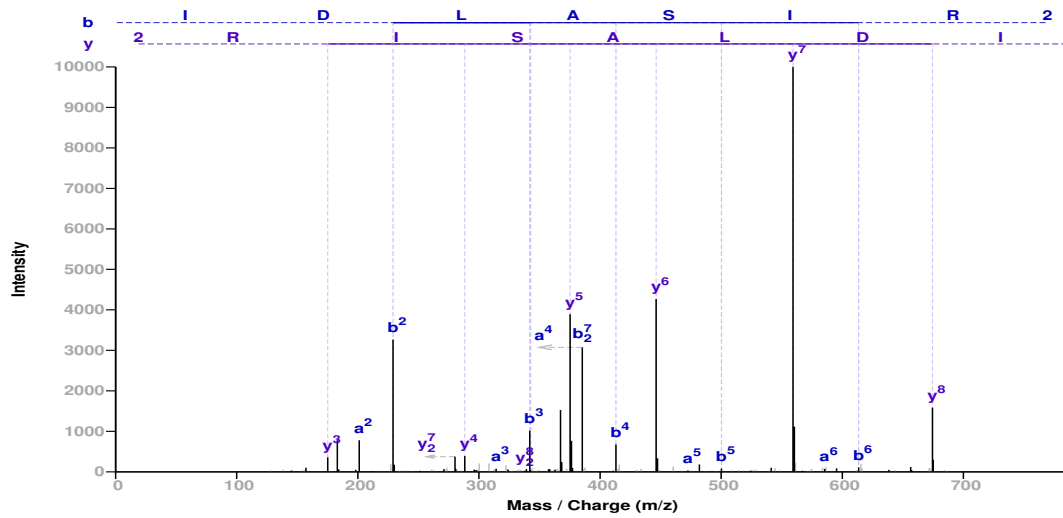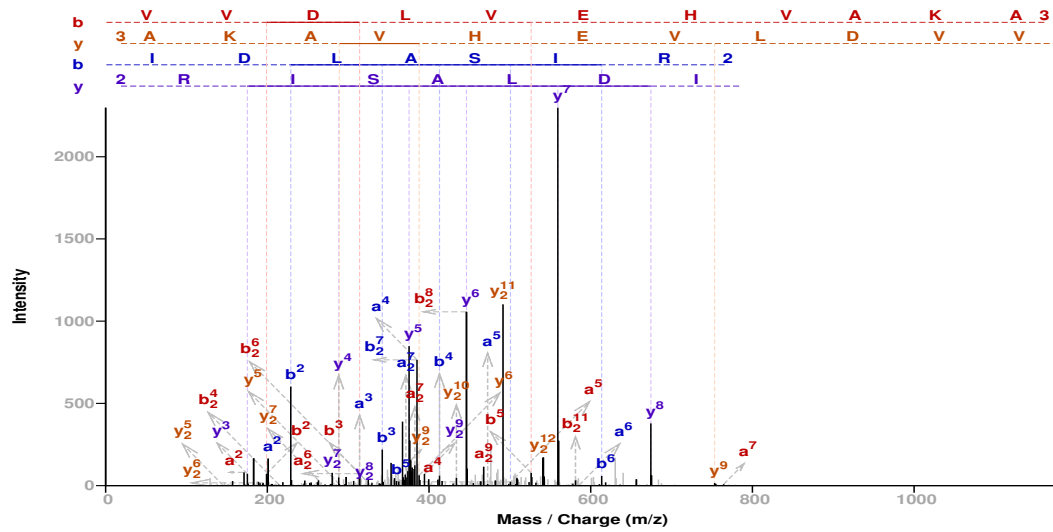

yeast01\_Scan\_Number\_5700 Precursor m/z: 590.344 cosine: 0.742  $\alpha$ : 0.380

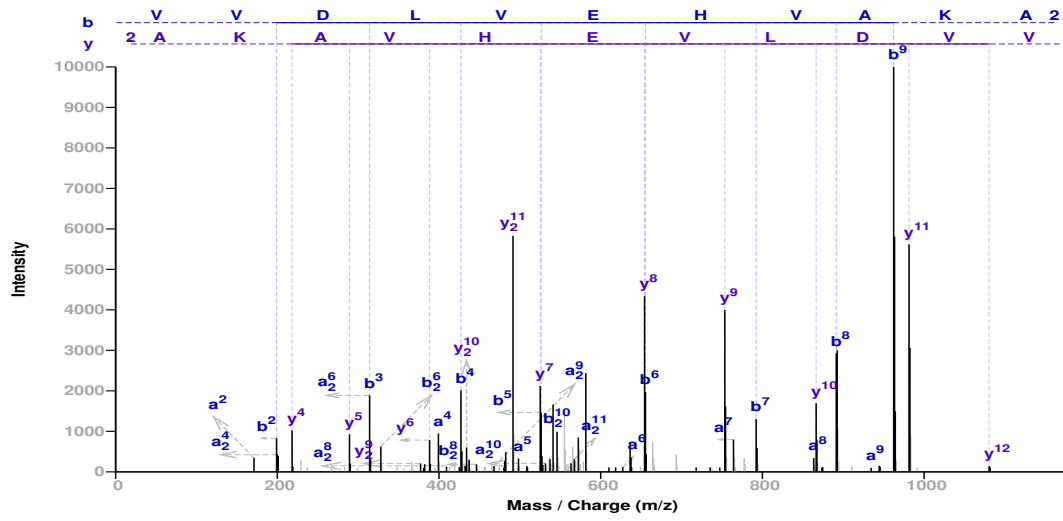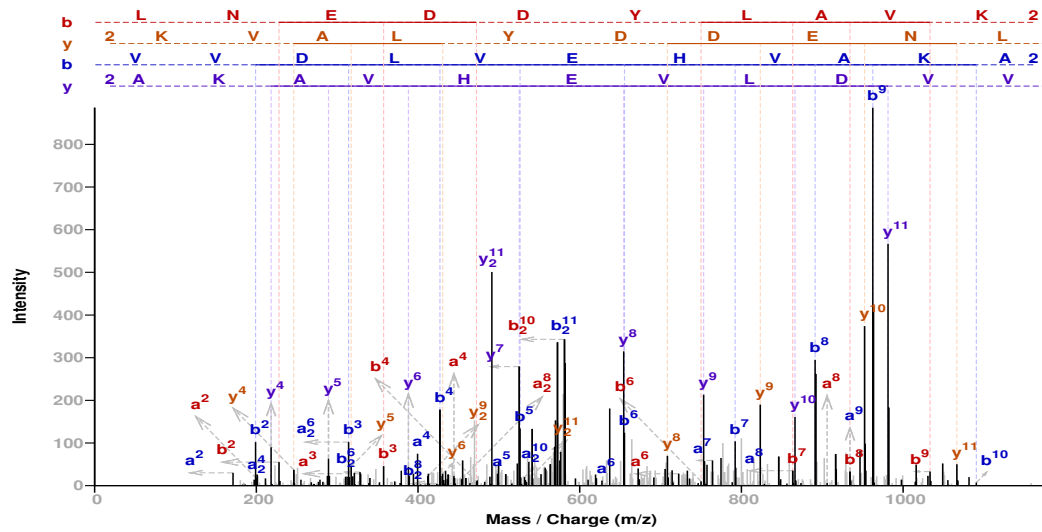



yeast01\_Scan\_Number\_2493 Precursor m/z: 437.240 cosine: 0.746  $\alpha$ : 0.379

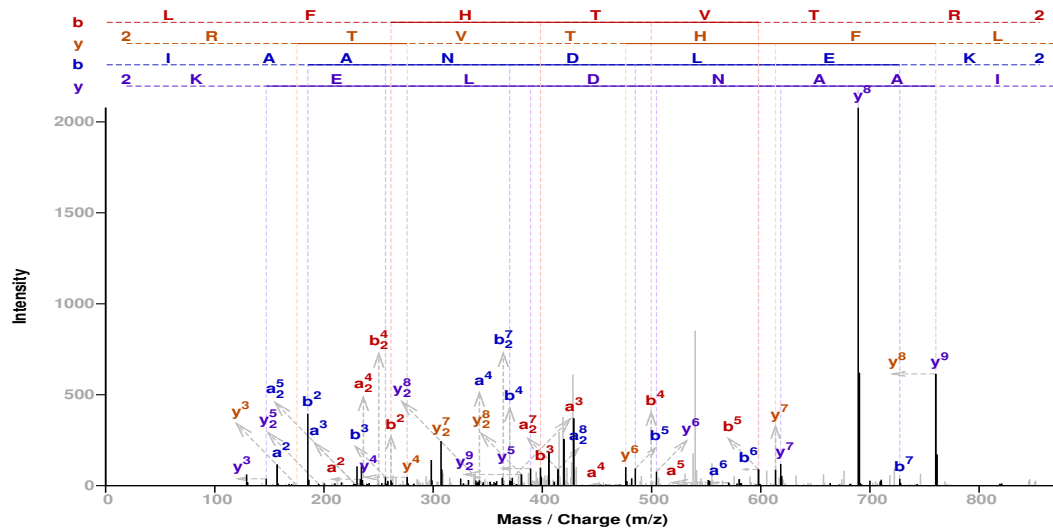

yeast01\_Scan\_Number\_4083 Precursor m/z: 424.752 cosine: 0.914  $\alpha$ : 0.375

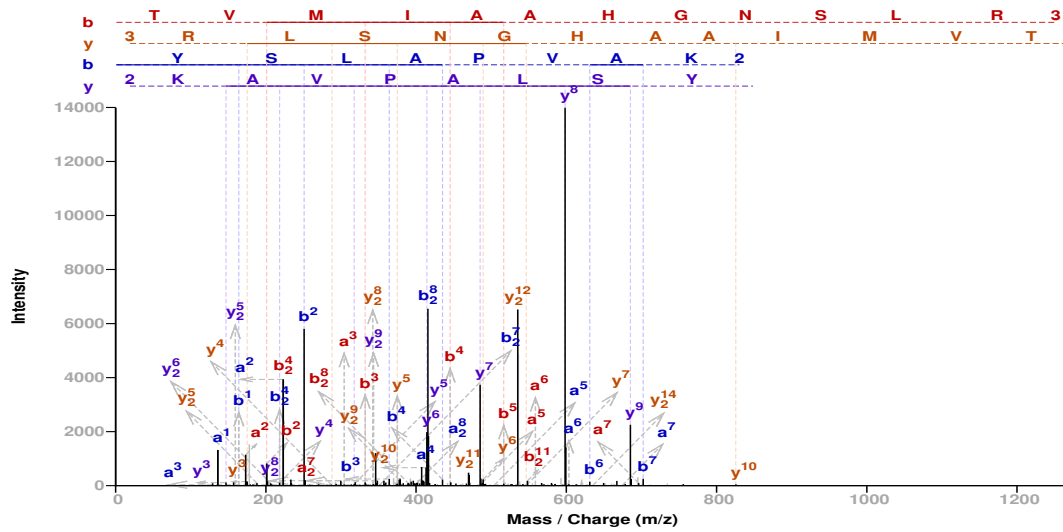

yeast01\_Scan\_Number\_4874 Precursor m/z: 432.737 cosine: 0.940  $\alpha$ : 0.373

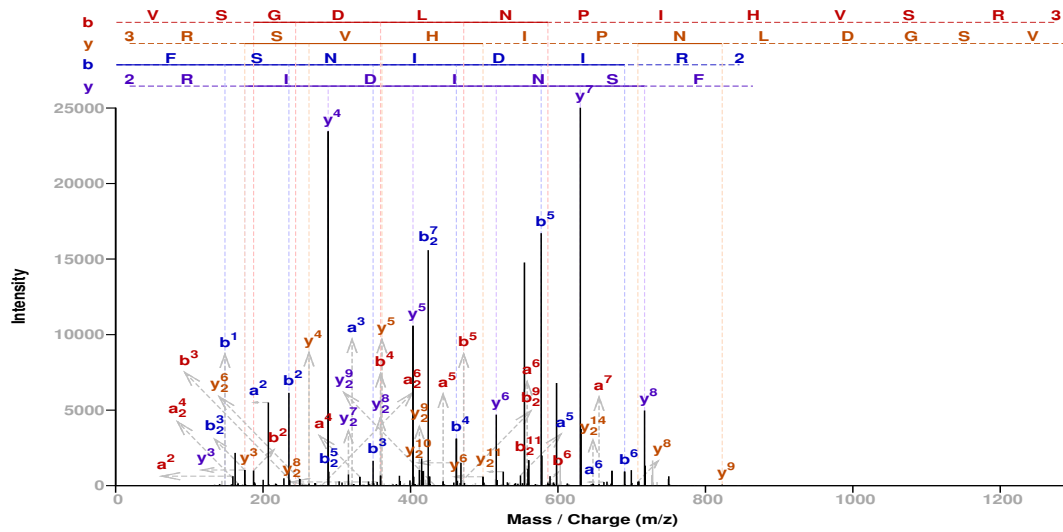

yeast01\_Scan\_Number\_7373 Precursor m/z: 662.862 cosine: 0.768  $\alpha$ : 0.372

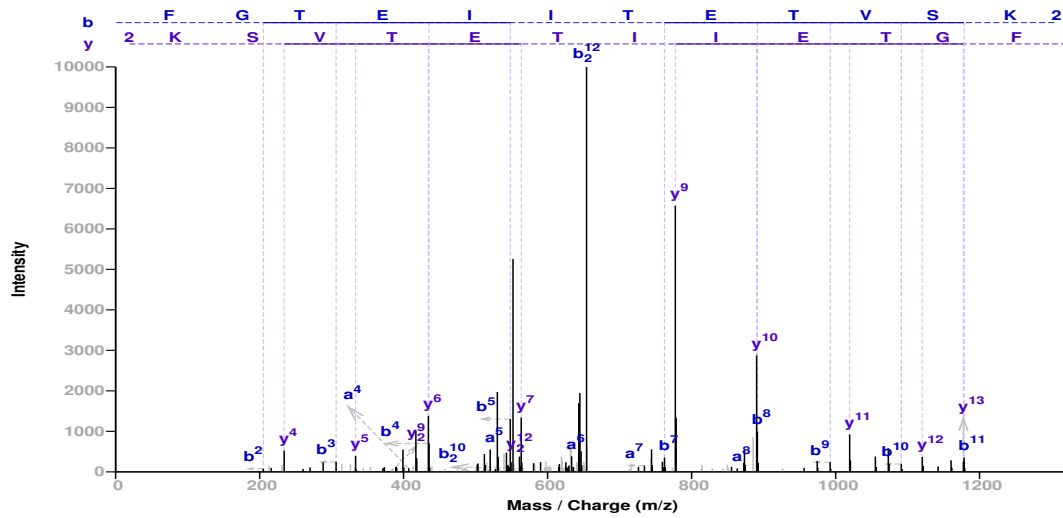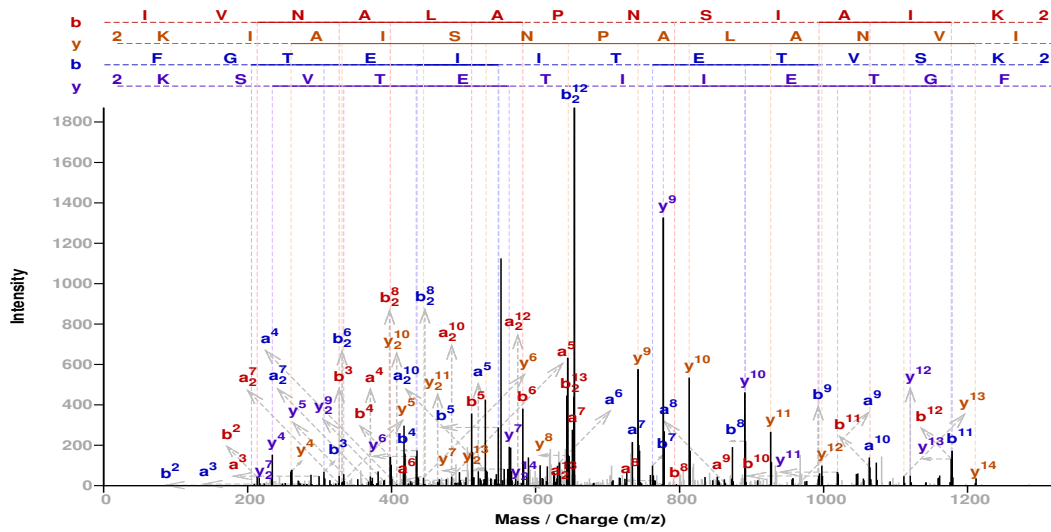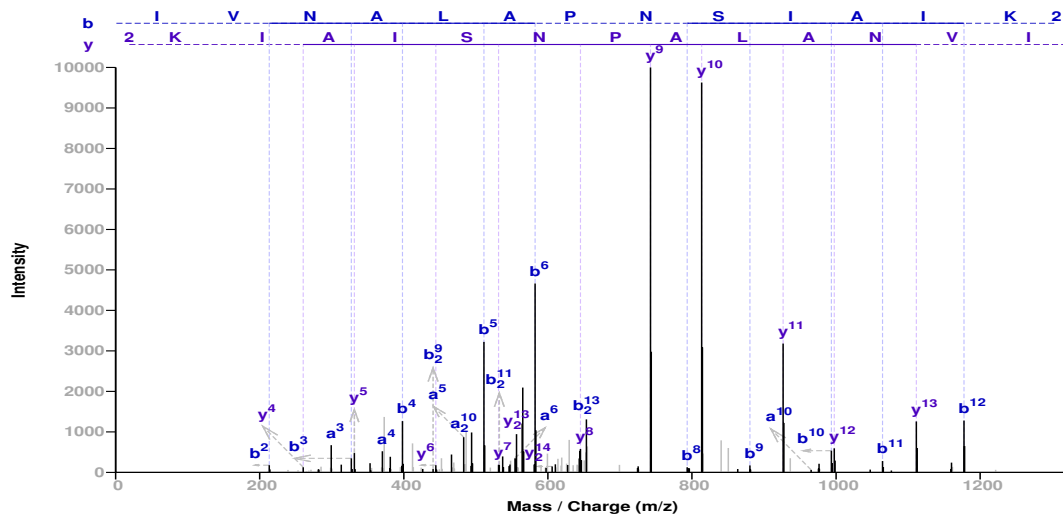

yeast01\_Scan\_Number\_4872 Precursor m/z: 452.579 cosine: 0.859  $\alpha$ : 0.367

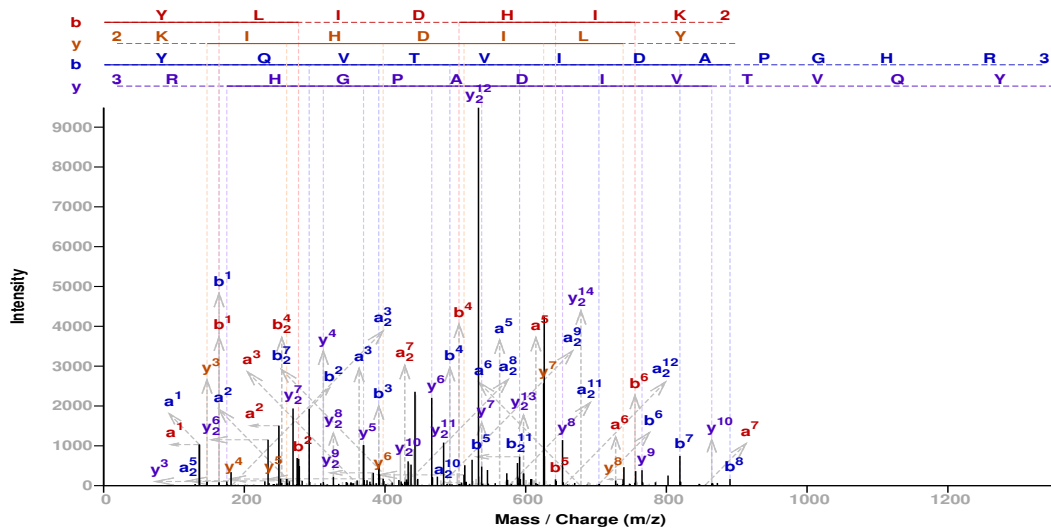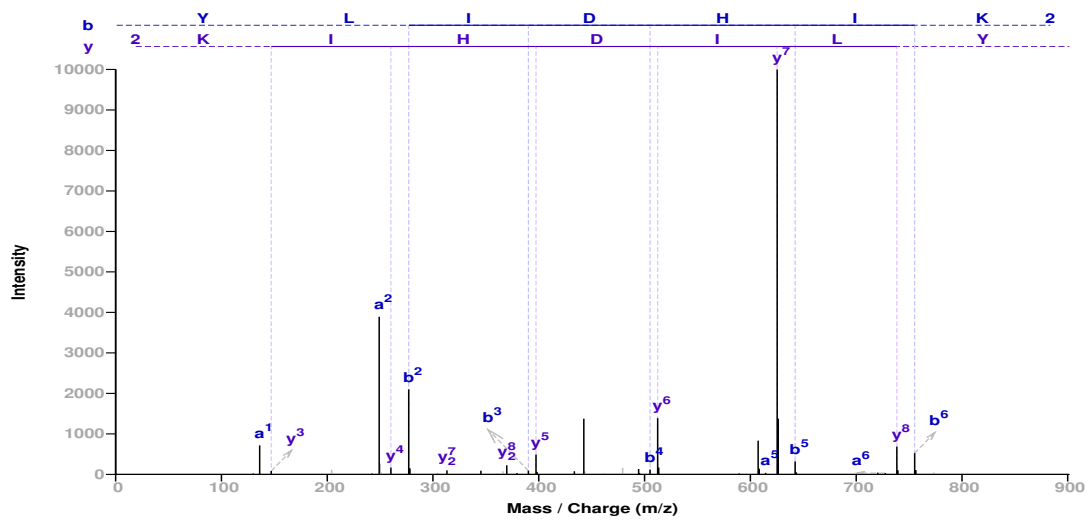



yeast01\_Scan\_Number\_3977 Precursor m/z: 496.808 cosine: 0.797  $\alpha$ : 0.358

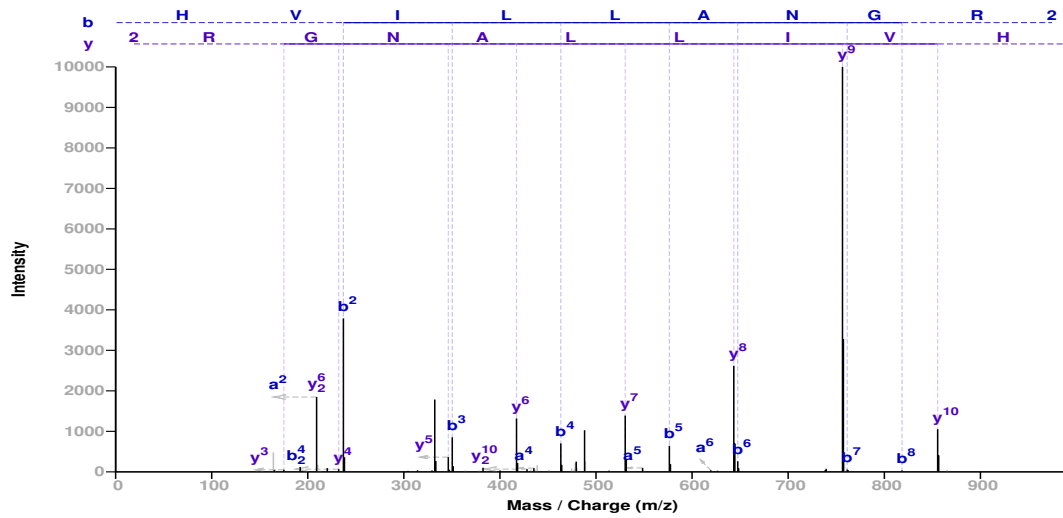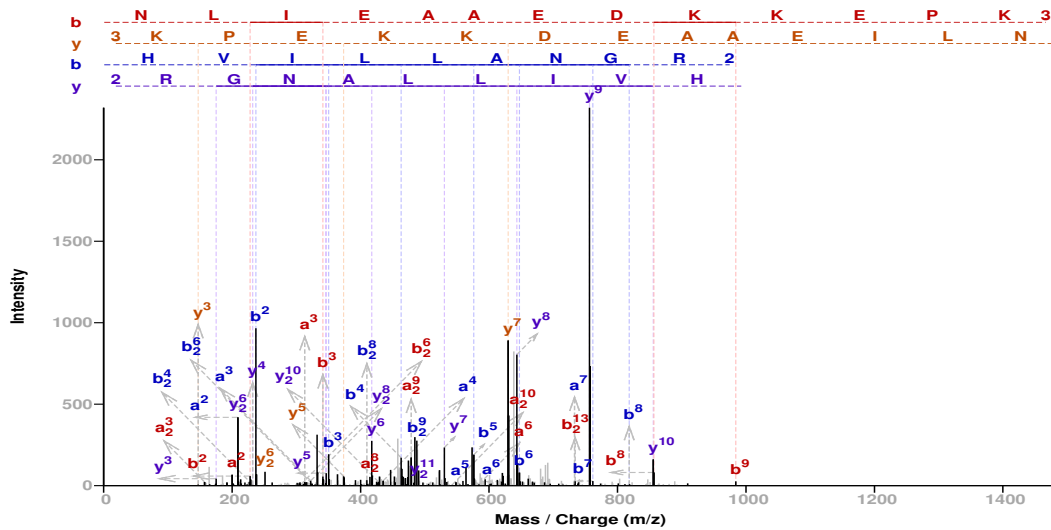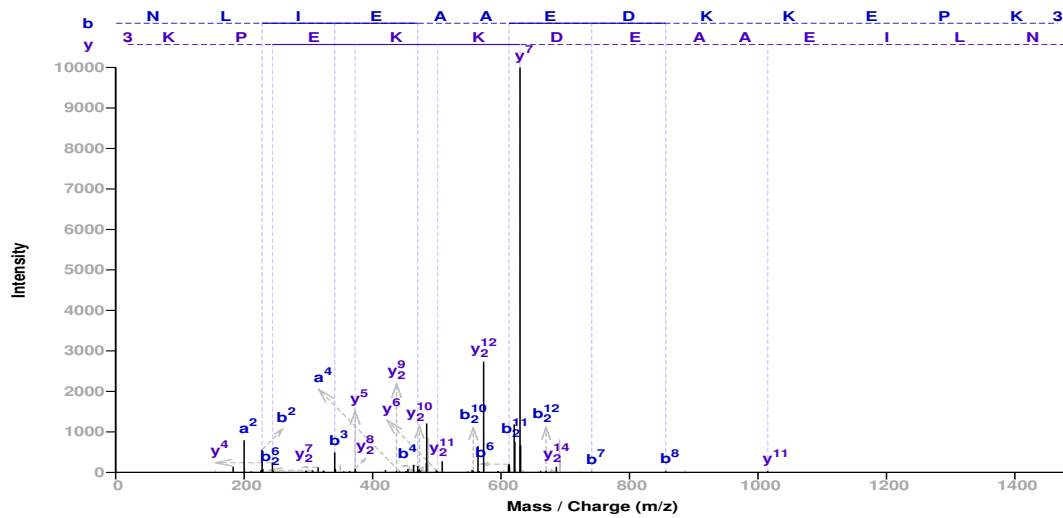

yeast01\_Scan\_Number\_9729 Precursor m/z: 810.790 cosine: 0.721  $\alpha$ : 0.357

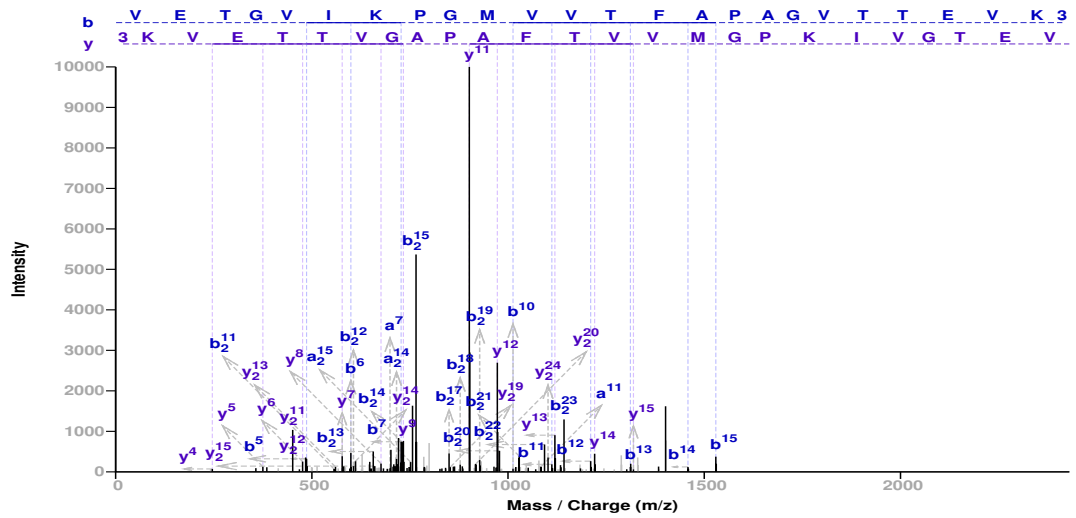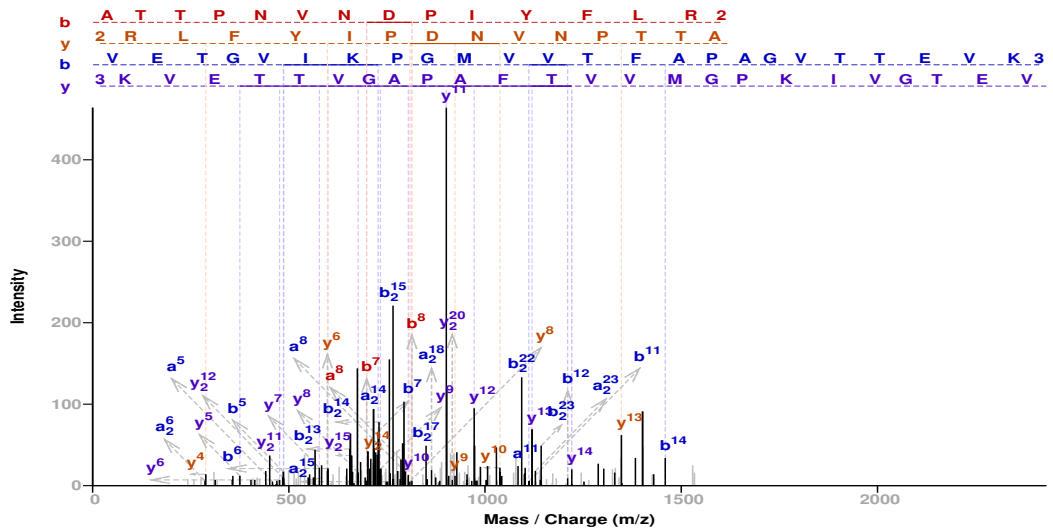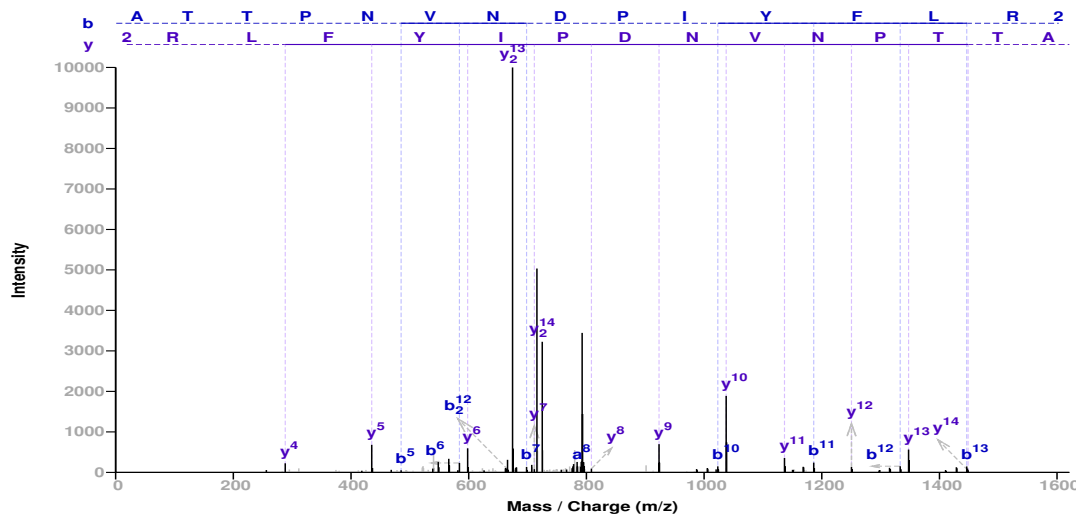



yeast01\_Scan\_Number\_4427 Precursor m/z: 481.741 cosine: 0.773  $\alpha$ : 0.354

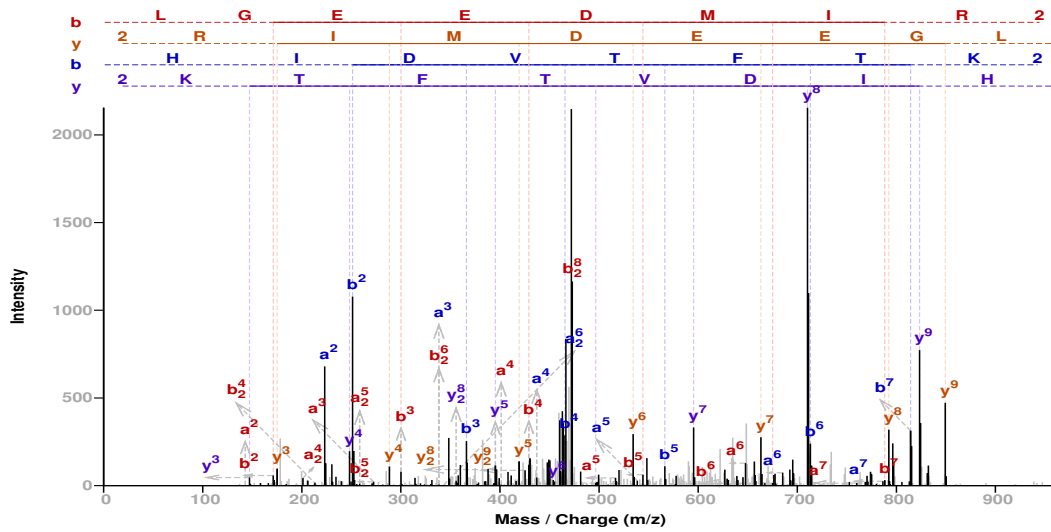

yeast01\_Scan\_Number\_7833 Precursor m/z: 594.822 cosine: 0.791  $\alpha$ : 0.349

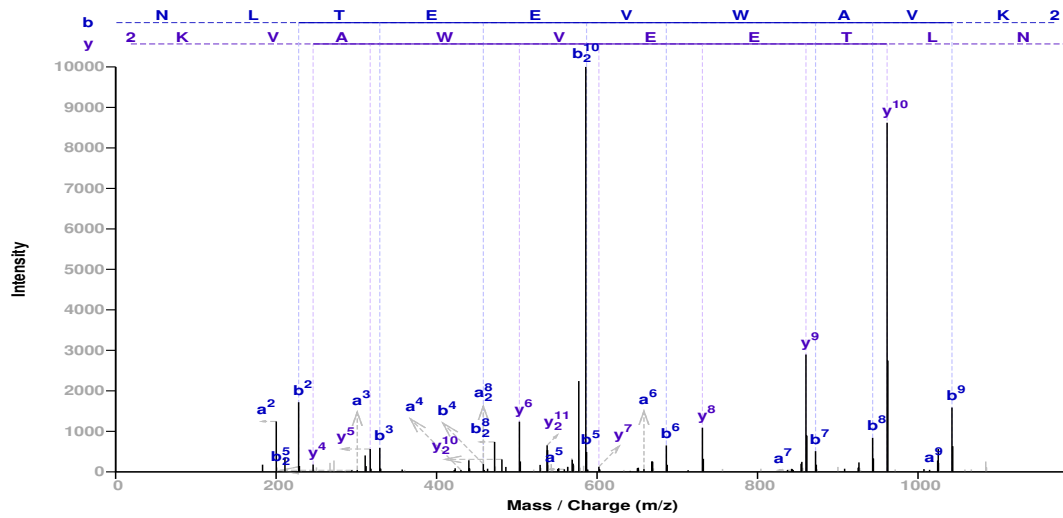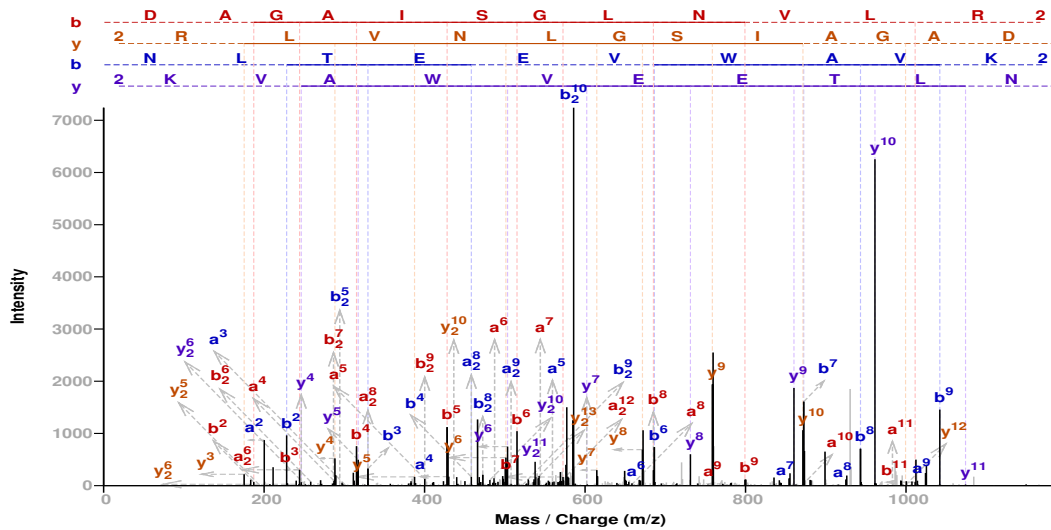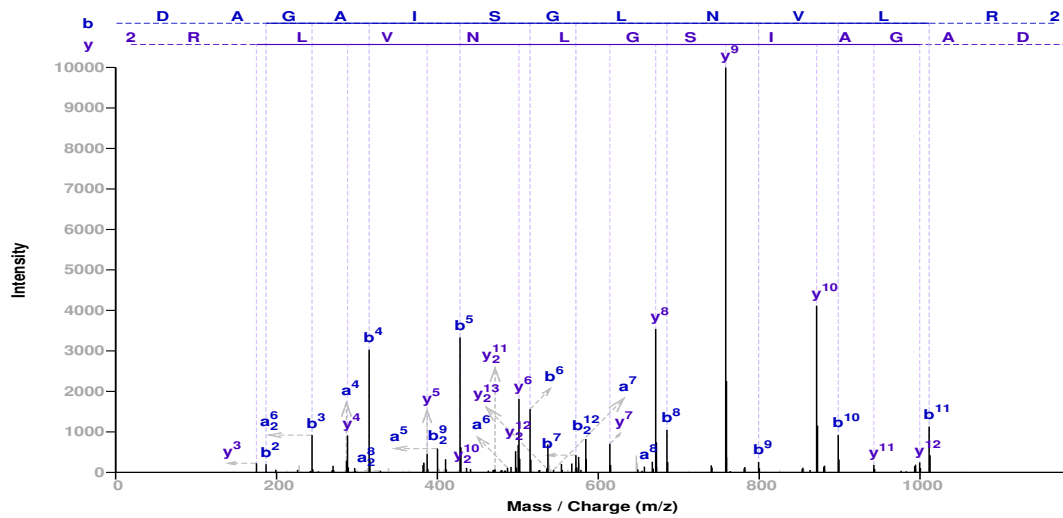

yeast01\_Scan\_Number\_2840 Precursor m/z: 332.518 cosine: 0.801  $\alpha$ : 0.349

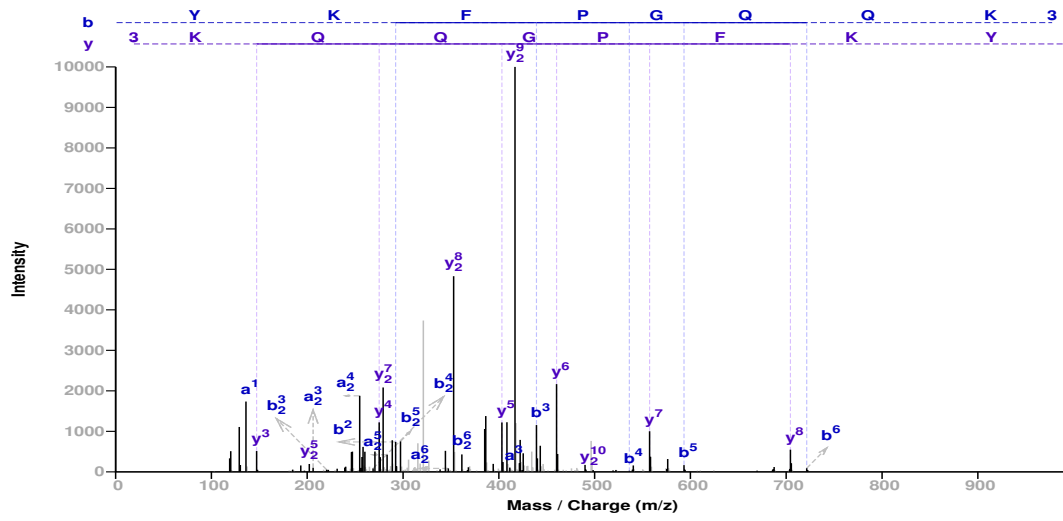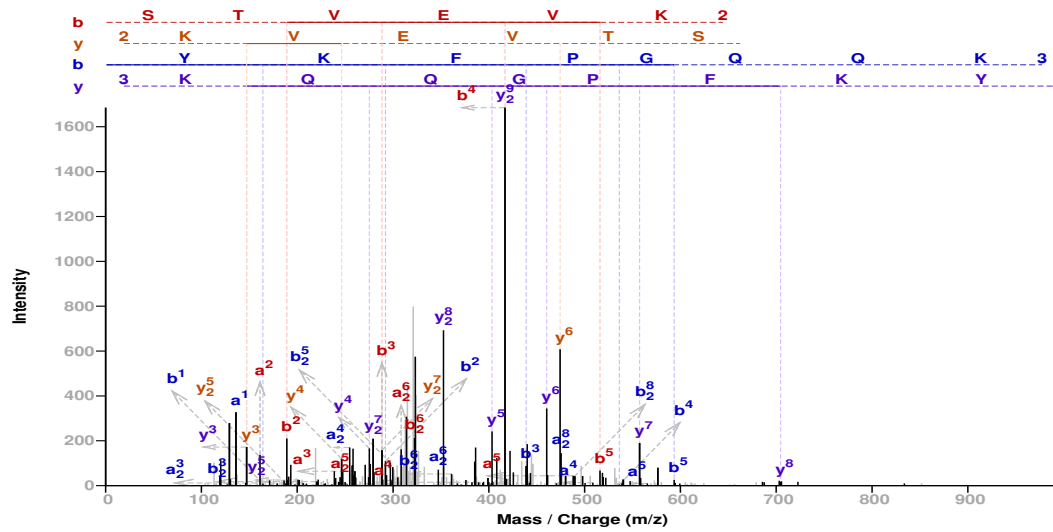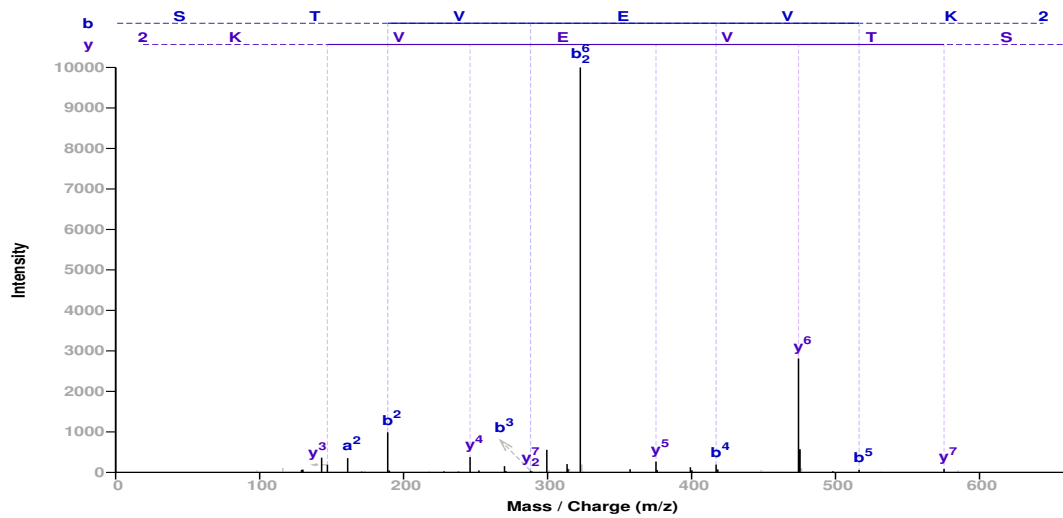

yeast01\_Scan\_Number\_8875 Precursor m/z: 808.948 cosine: 0.756  $\alpha$ : 0.349

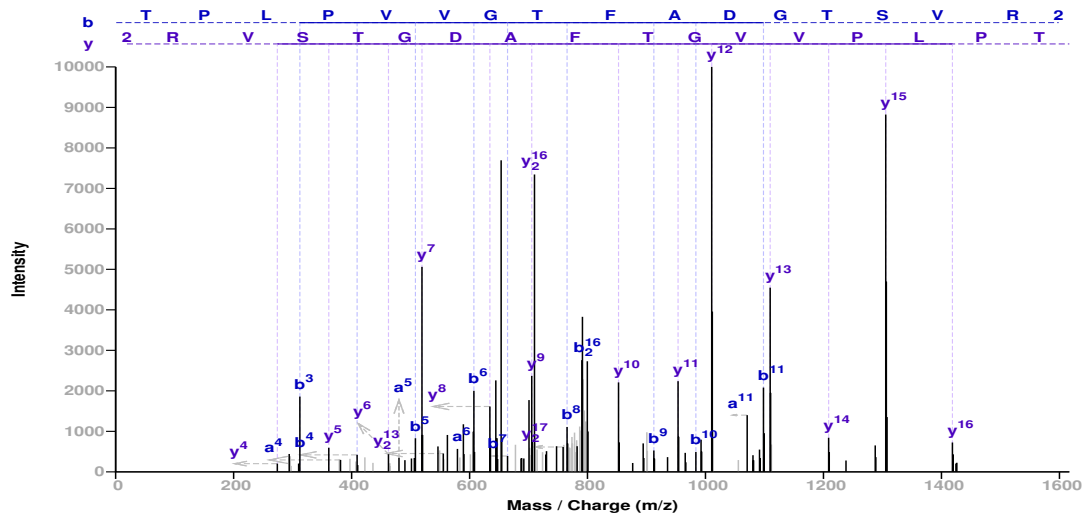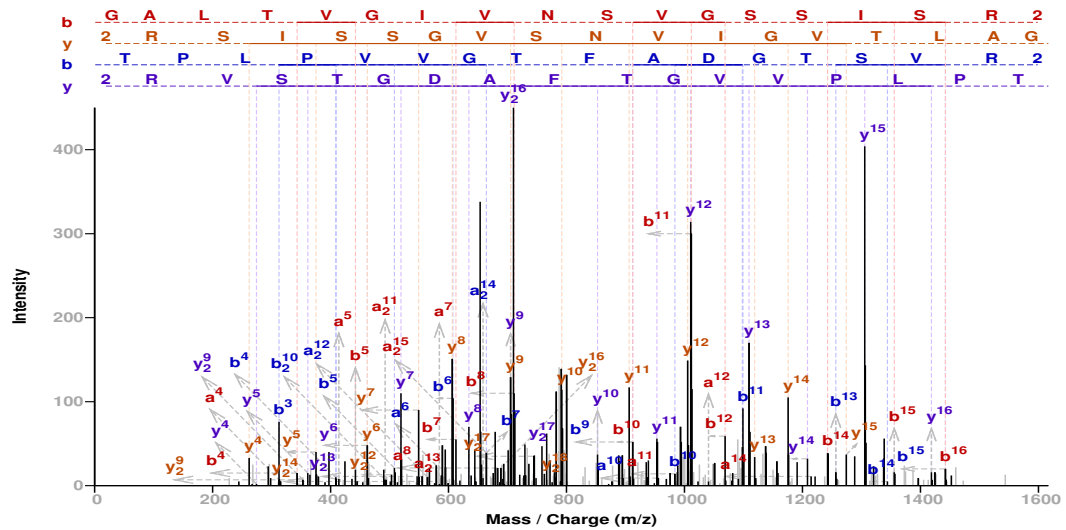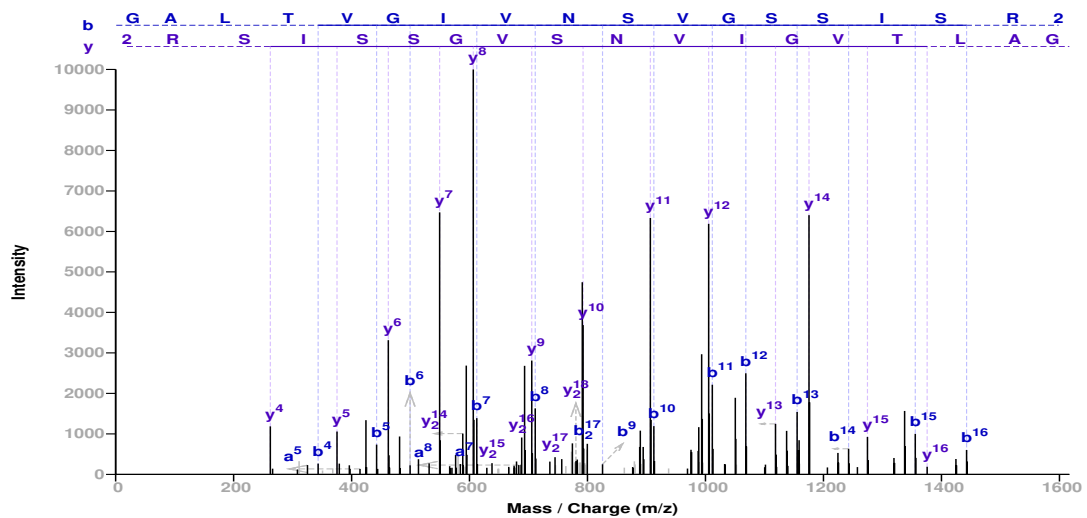

yeast01\_Scan\_Number\_3713 Precursor m/z: 396.872 cosine: 0.792  $\alpha$ : 0.348

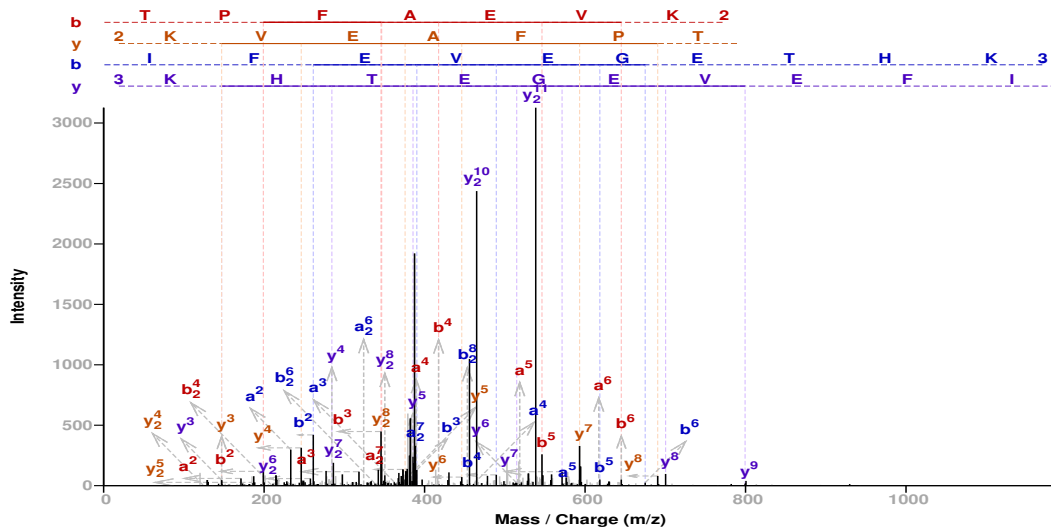

yeast01\_Scan\_Number\_3261 Precursor m/z: 527.271 cosine: 0.883  $\alpha$ : 0.334

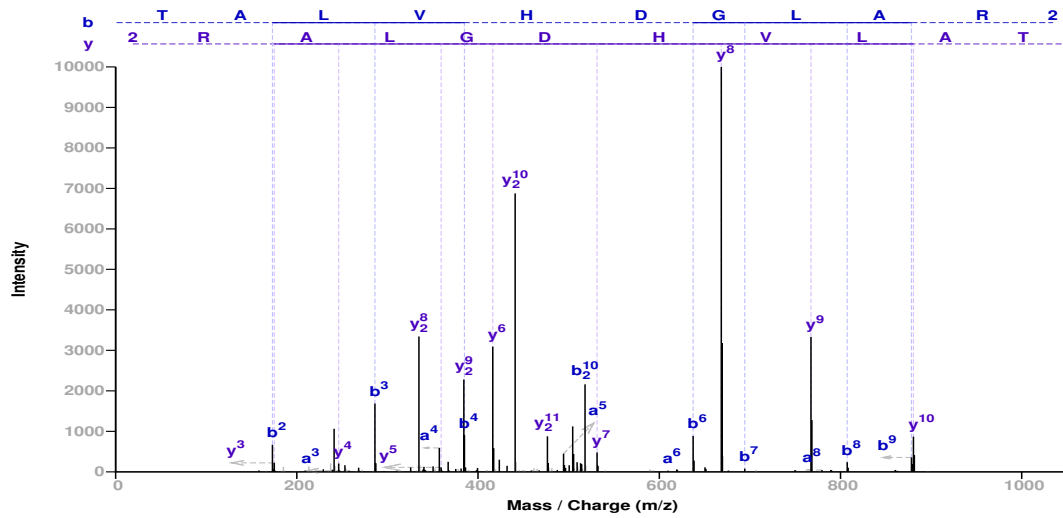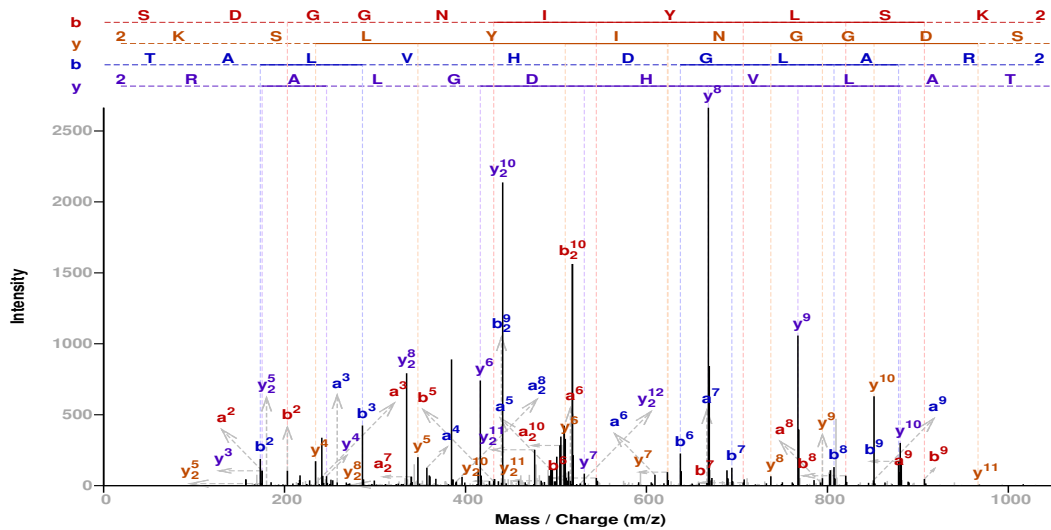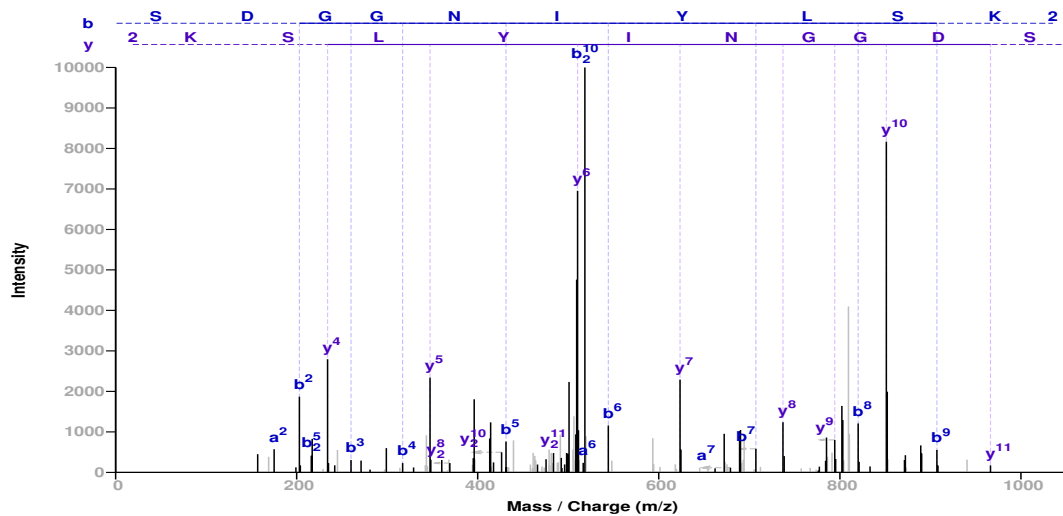

yeast01\_Scan\_Number\_2564 Precursor m/z: 424.253 cosine: 0.887  $\alpha$ : 0.329

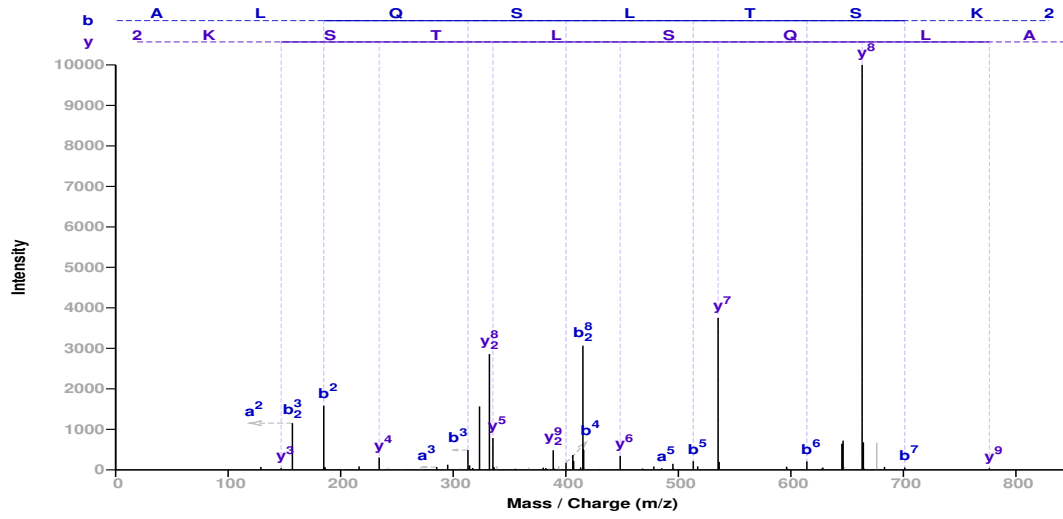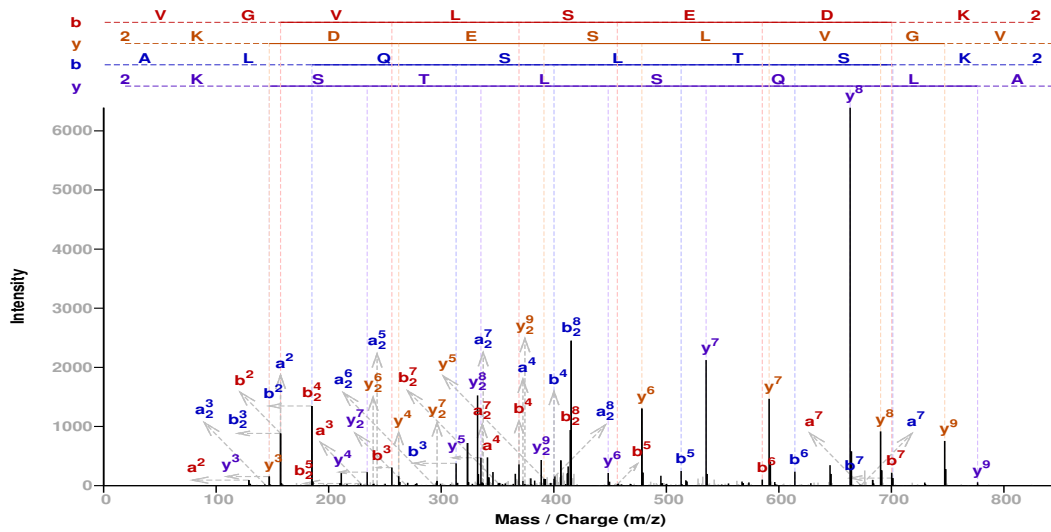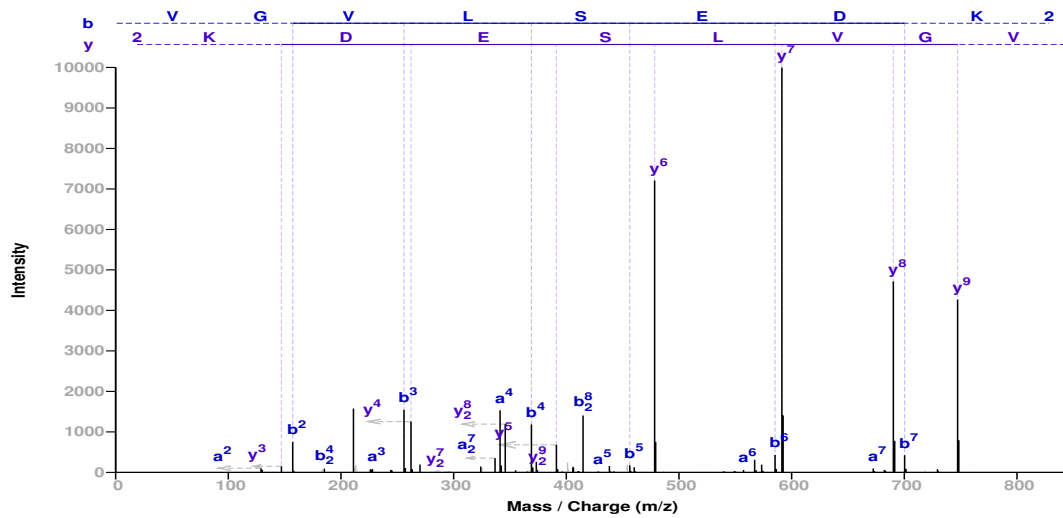

yeast01\_Scan\_Number\_3480 Precursor m/z: 415.567 cosine: 0.799  $\alpha$ : 0.329

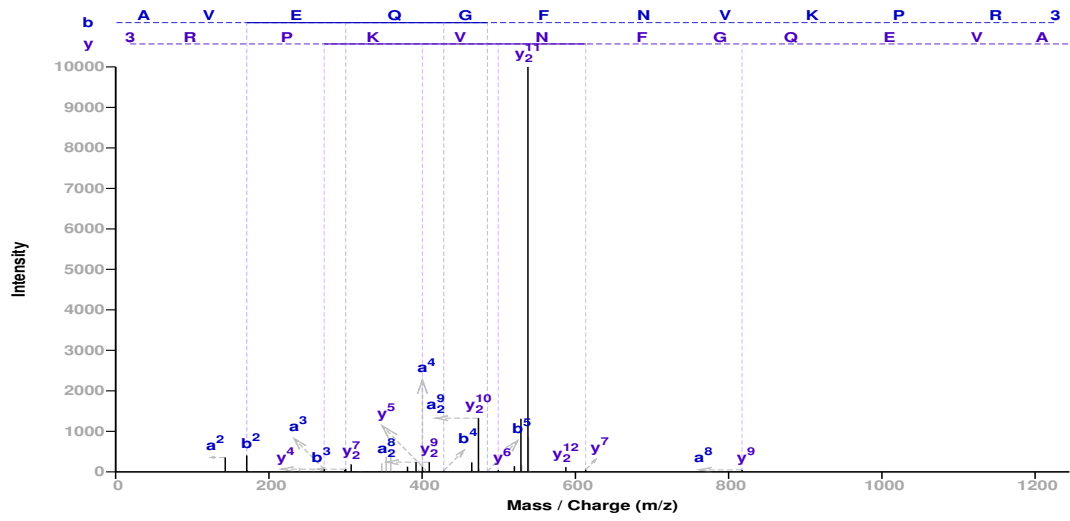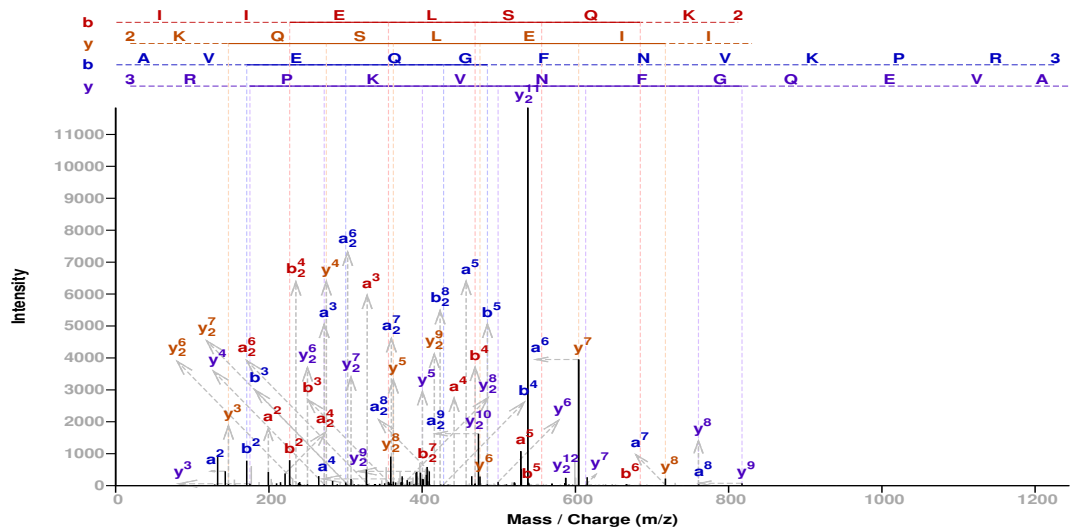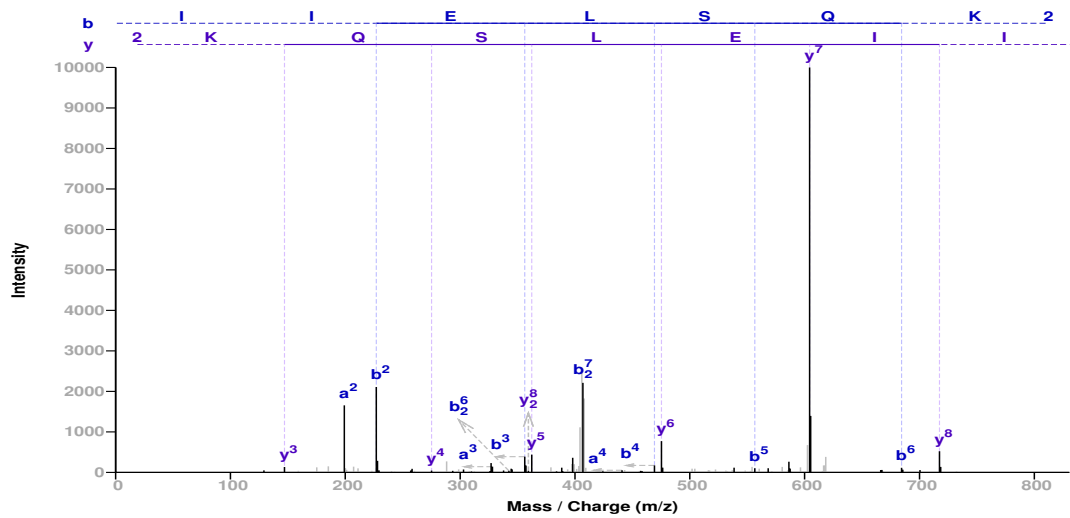



yeast01\_Scan\_Number\_3507 Precursor m/z: 447.280 cosine: 0.813  $\alpha$ : 0.327

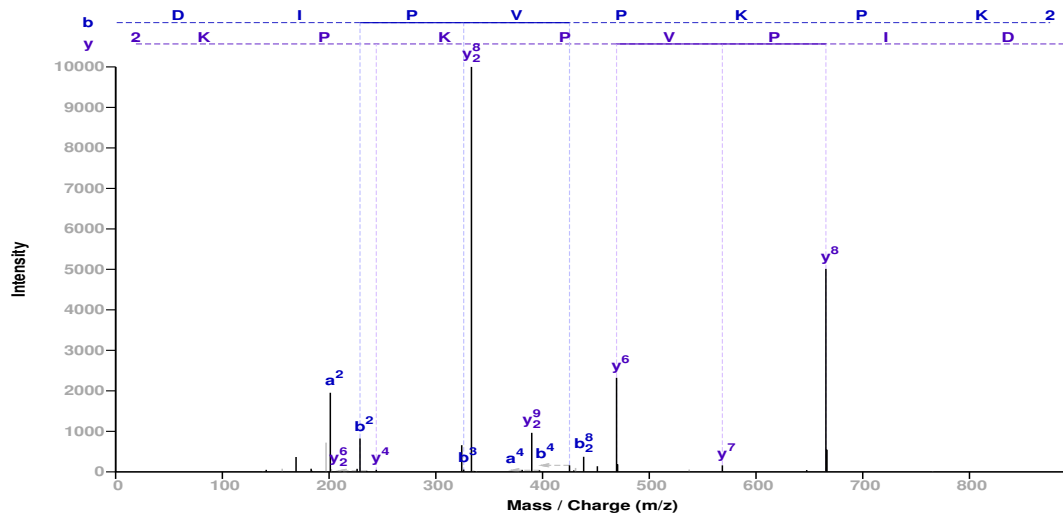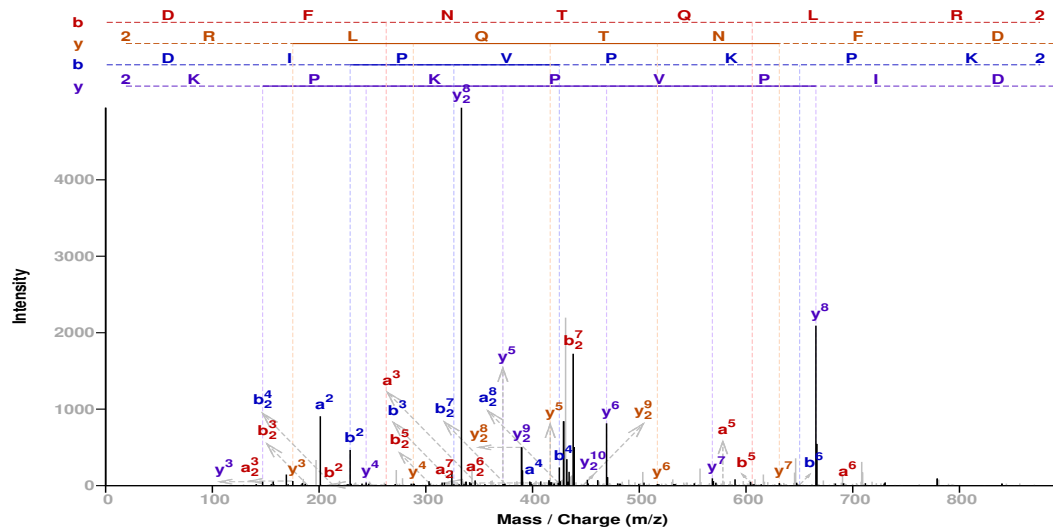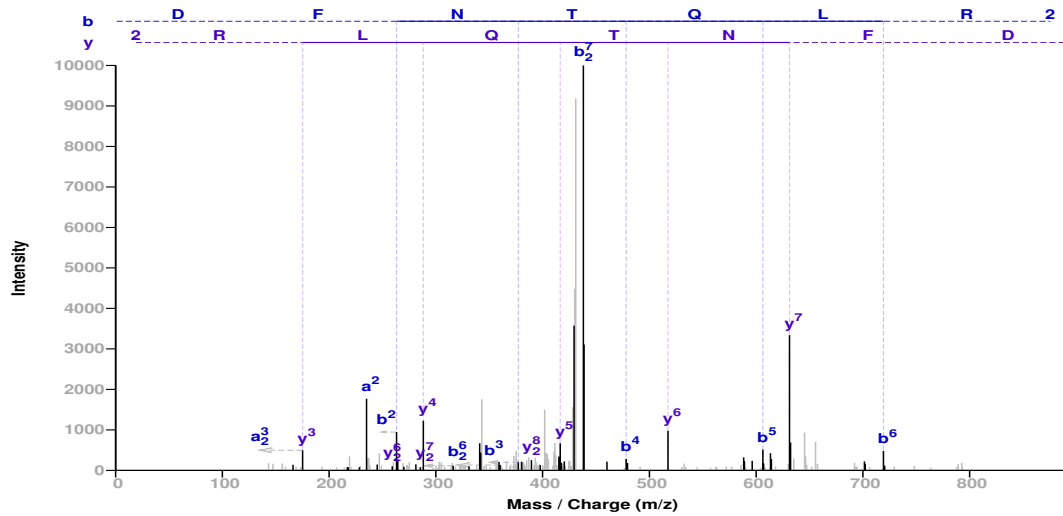

yeast01\_Scan\_Number\_8179 Precursor m/z: 814.964 cosine: 0.816  $\alpha$ : 0.327

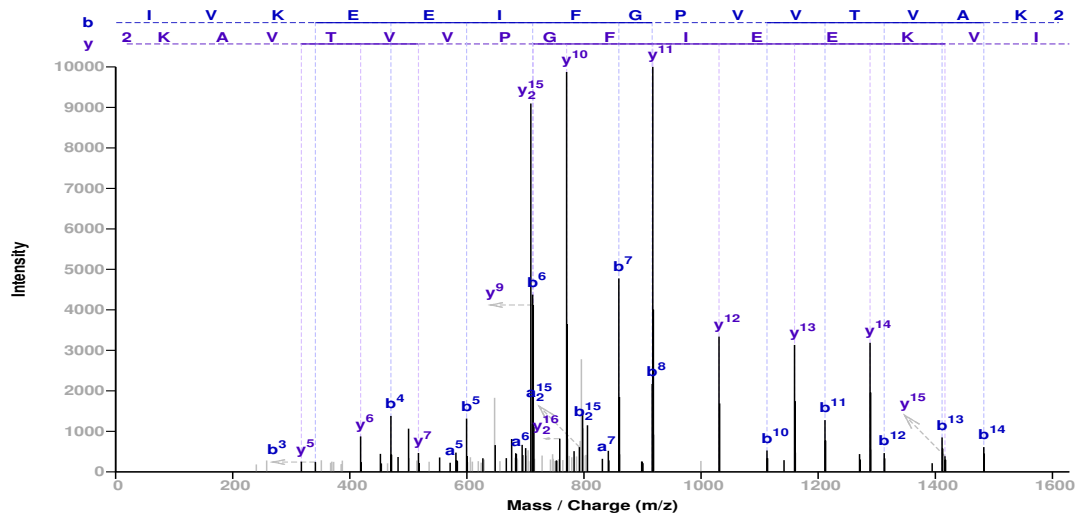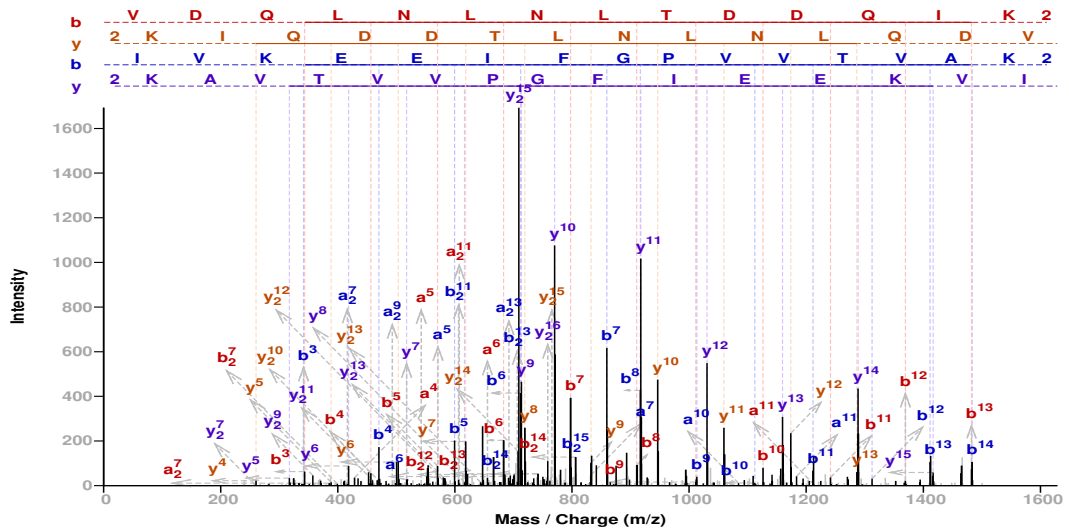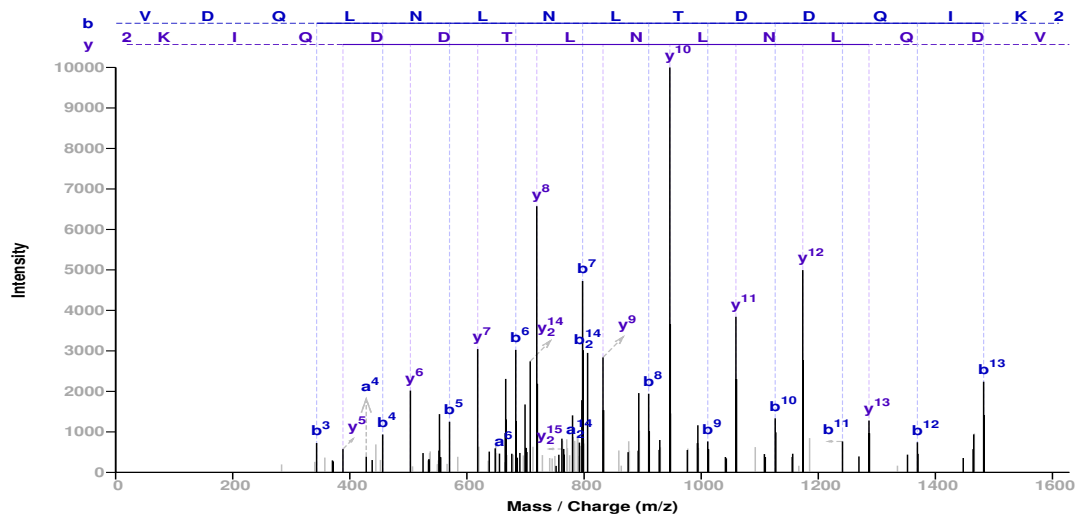

yeast01\_Scan\_Number\_5390 Precursor m/z: 530.596 cosine: 0.868  $\alpha$ : 0.326

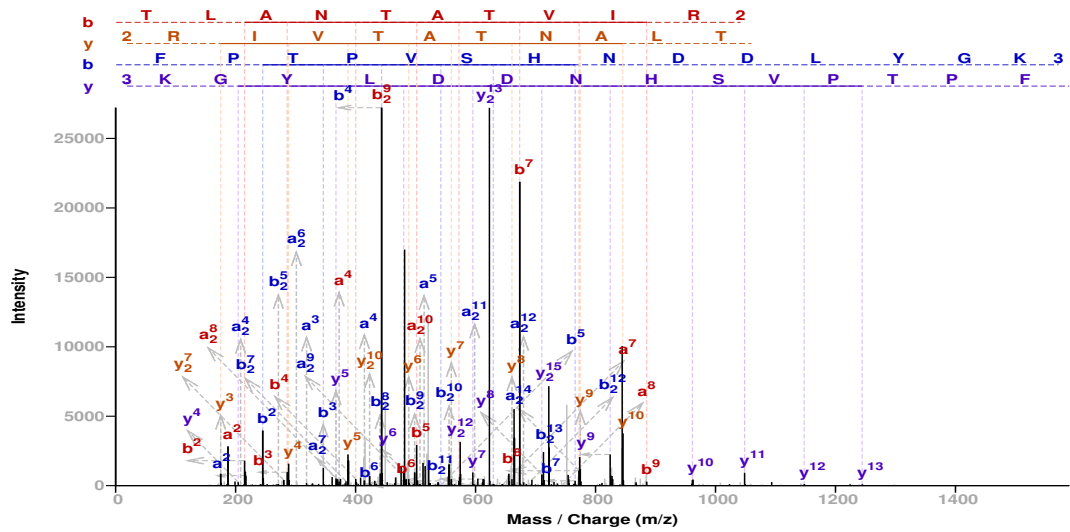

yeast01\_Scan\_Number\_644 Precursor m/z: 417.244 cosine: 0.848  $\alpha$ : 0.326

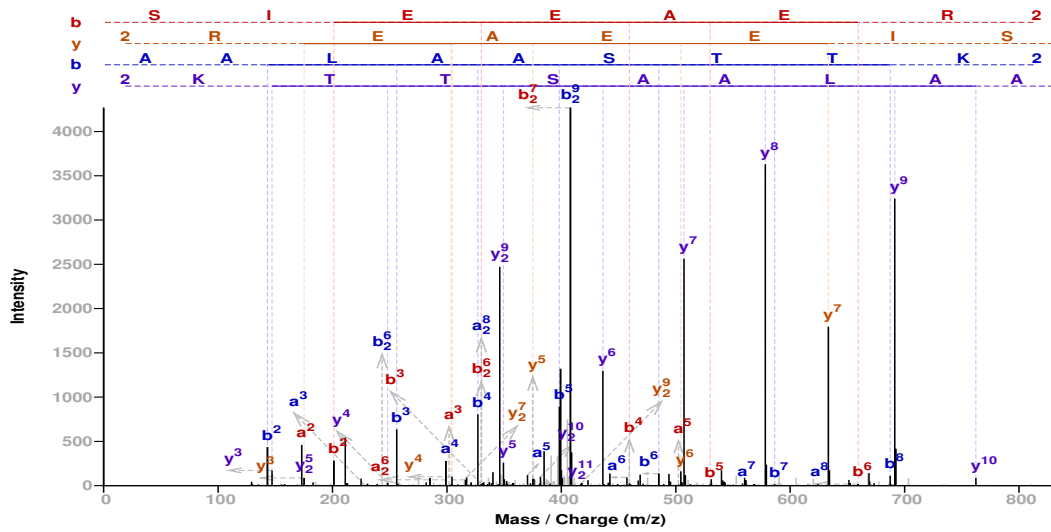

yeast01\_Scan\_Number\_5367 Precursor m/z: 651.839 cosine: 0.807  $\alpha$ : 0.325

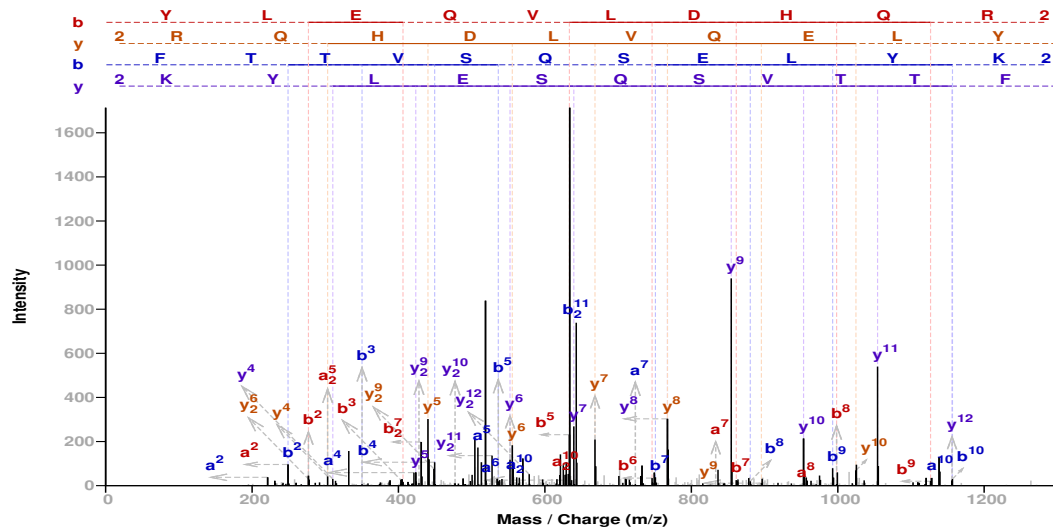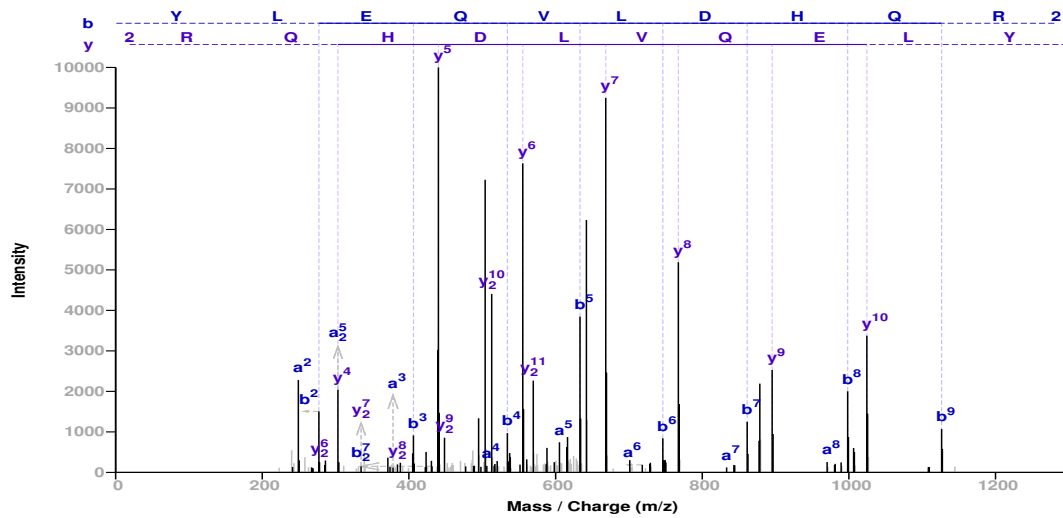

yeast01\_Scan\_Number\_1749 Precursor m/z: 402.731 cosine: 0.763  $\alpha$ : 0.323

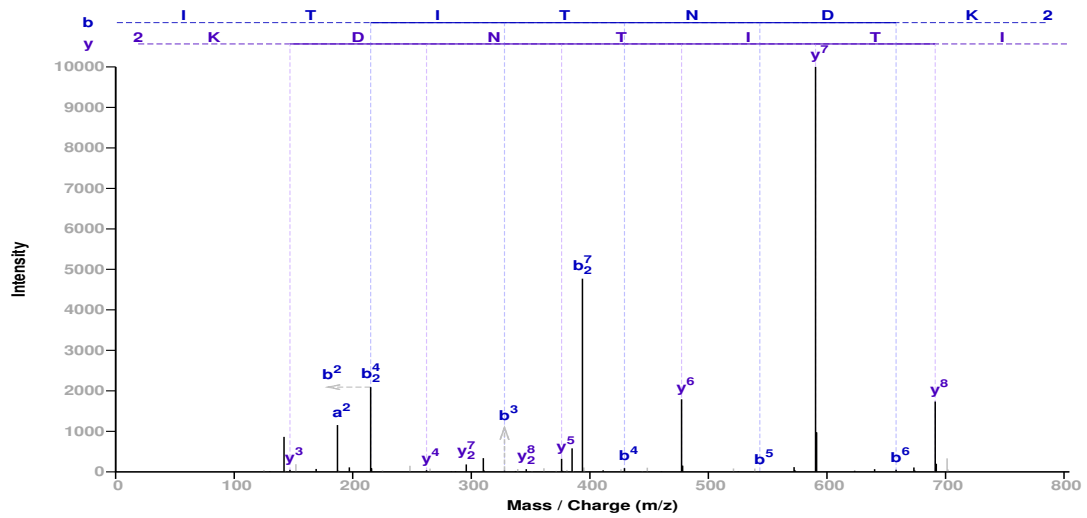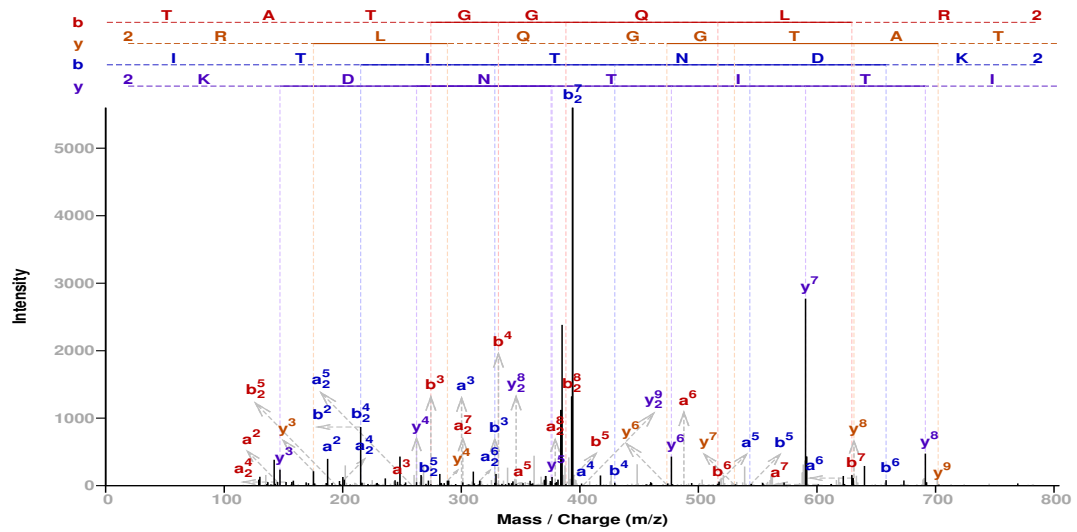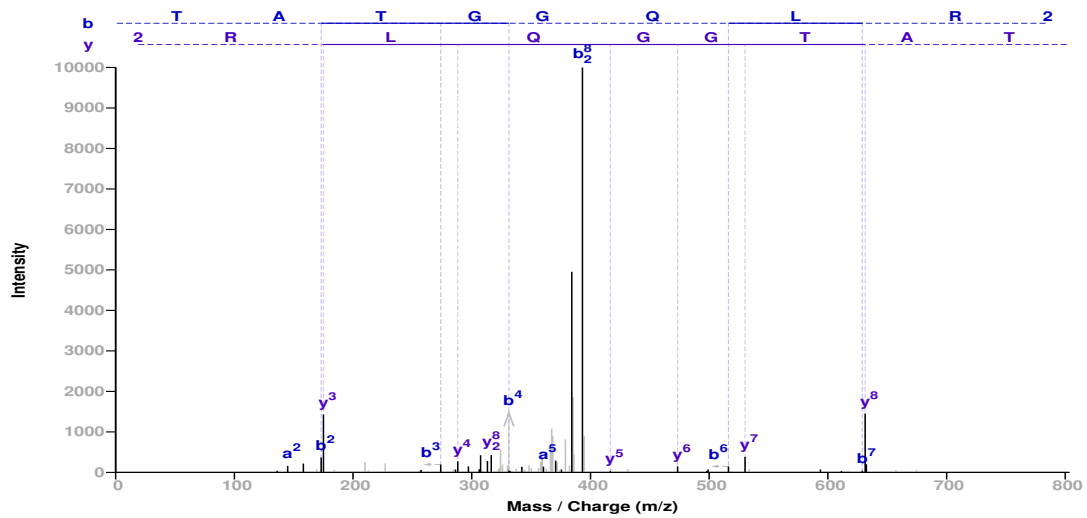



yeast01.Scan\_Number\_9031 Precursor m/z: 595.629 cosine: 0.758  $\alpha$ : 0.316

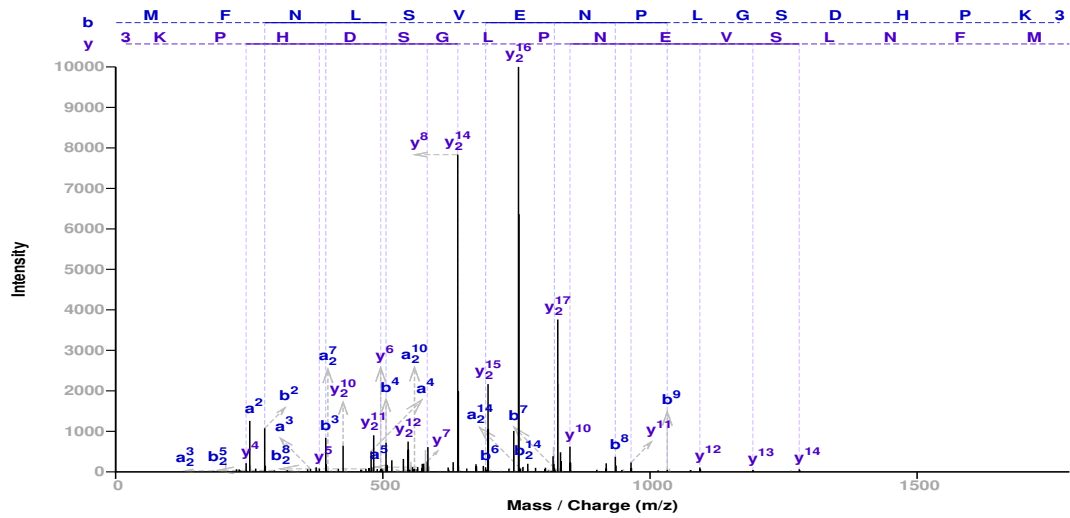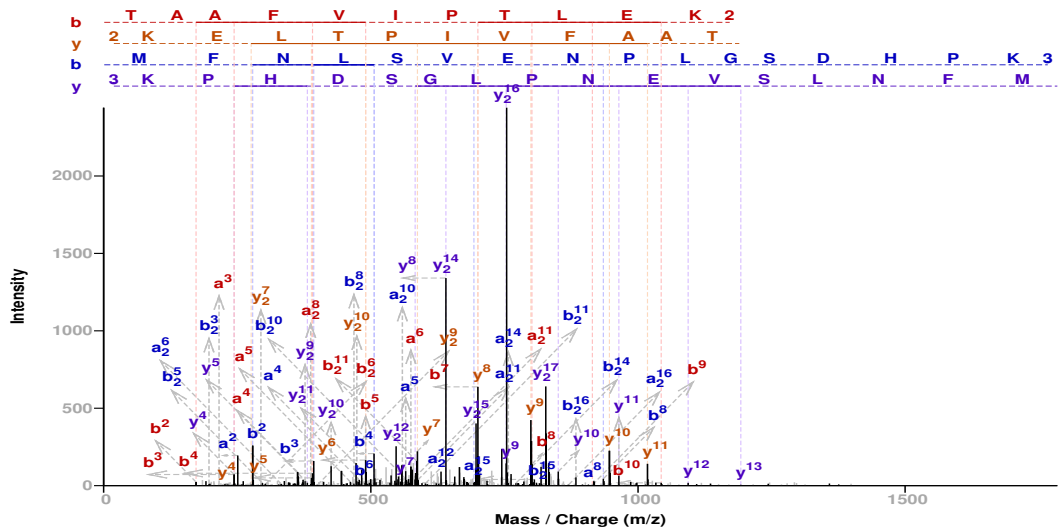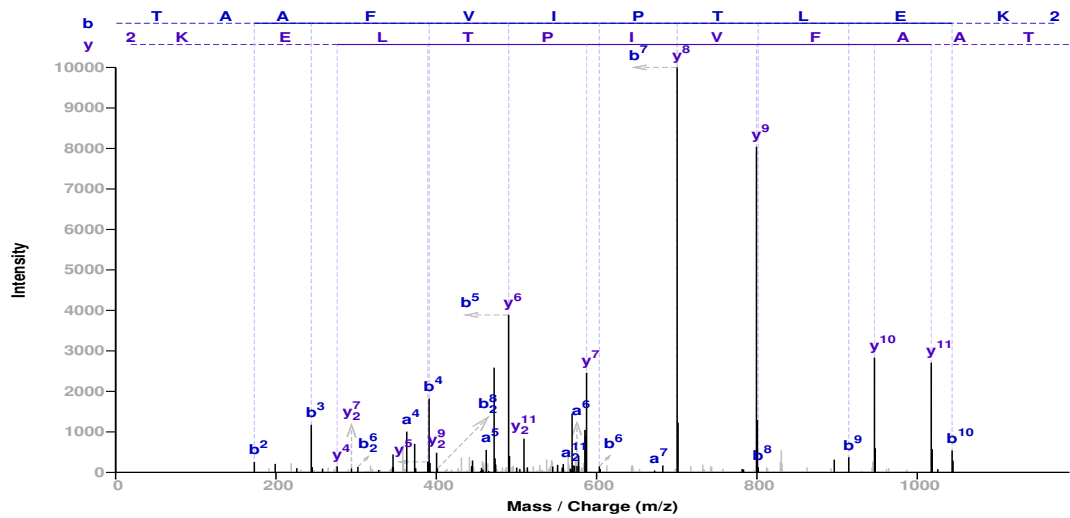



yeast01\_Scan\_Number\_7483 Precursor m/z: 508.769 cosine: 0.782  $\alpha$ : 0.315

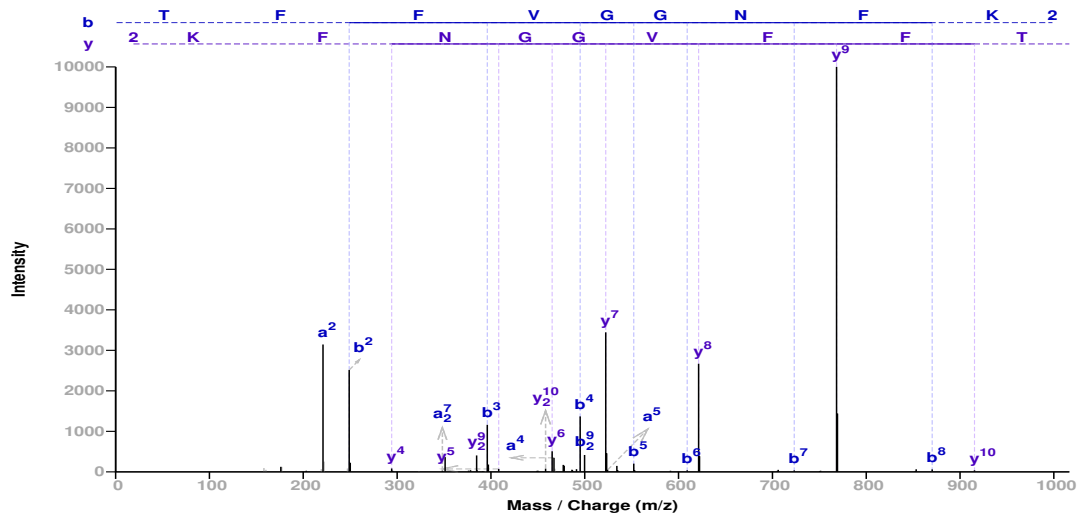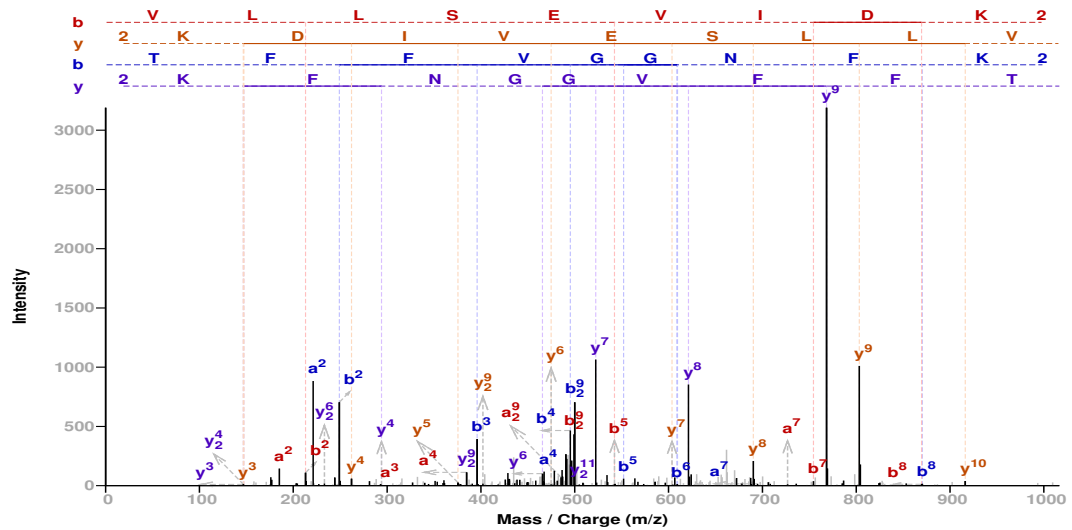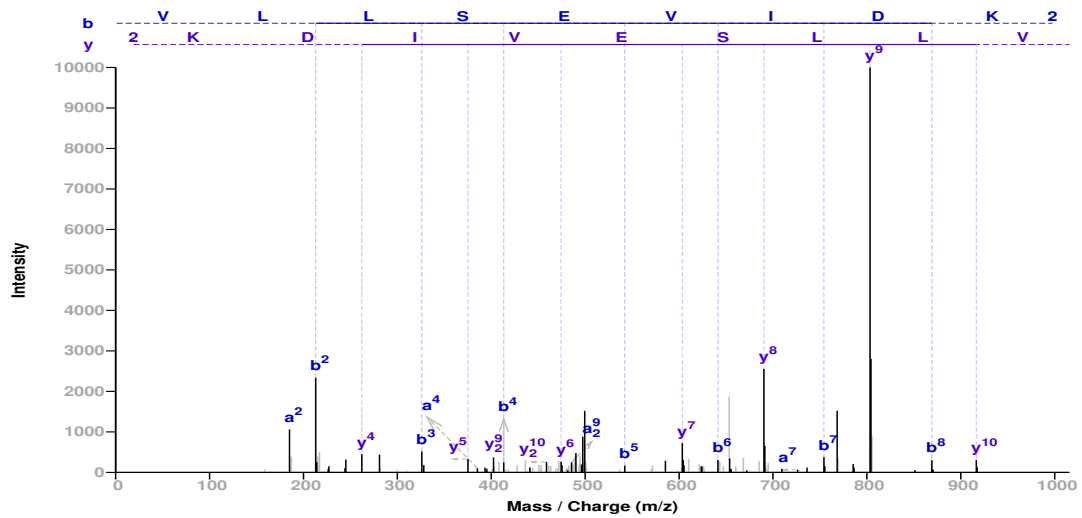

yeast01\_Scan\_Number\_2223 Precursor m/z: 330.841 cosine: 0.774  $\alpha$ : 0.312

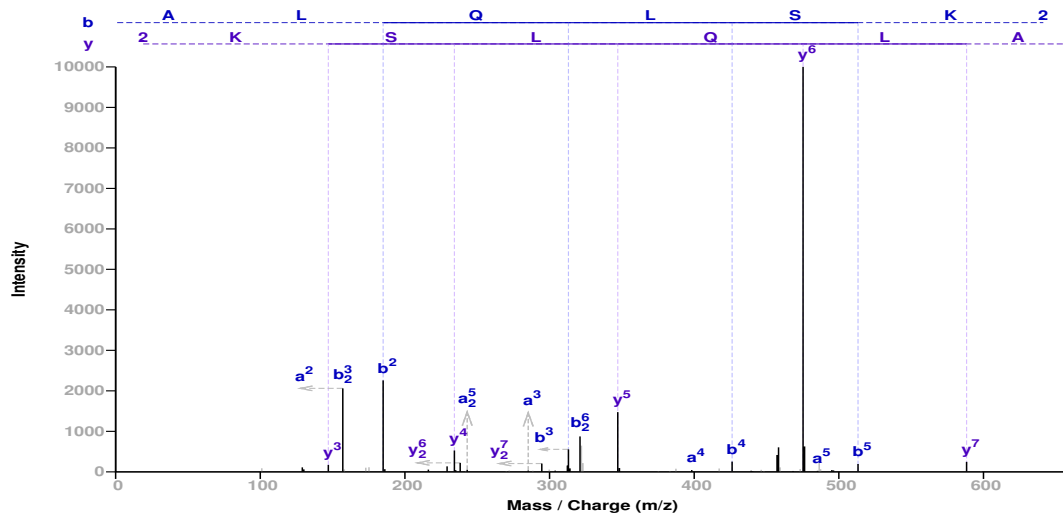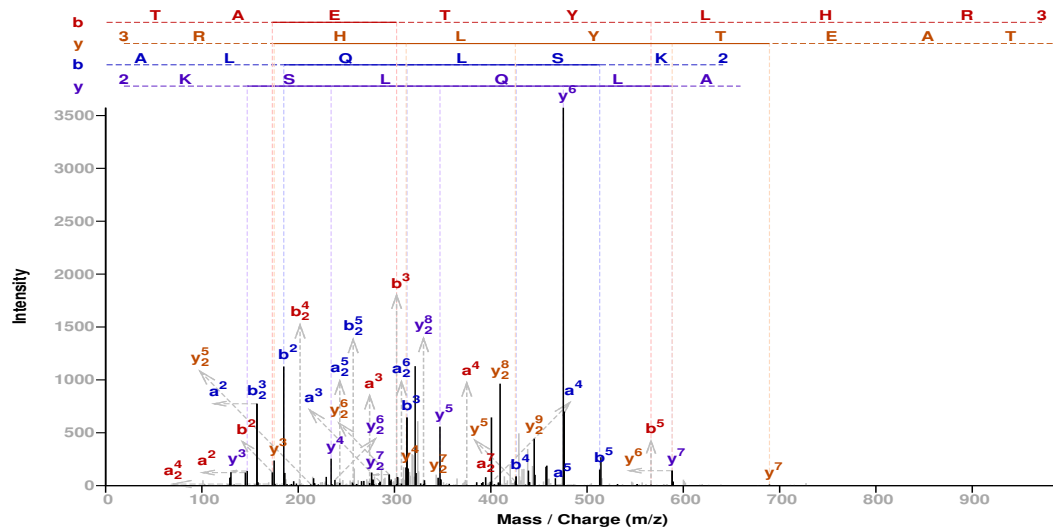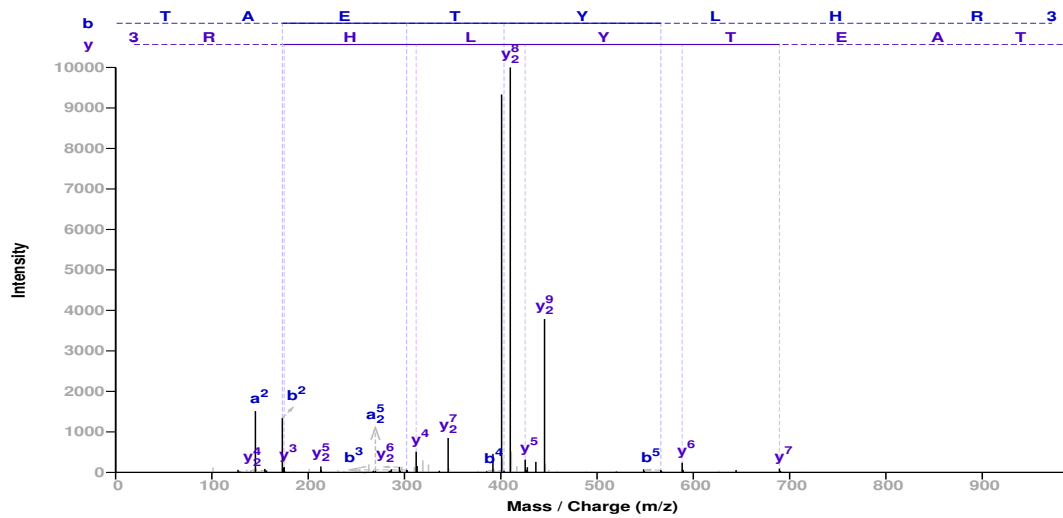

yeast01\_Scan\_Number\_7724 Precursor m/z: 496.289 cosine: 0.815  $\alpha$ : 0.310

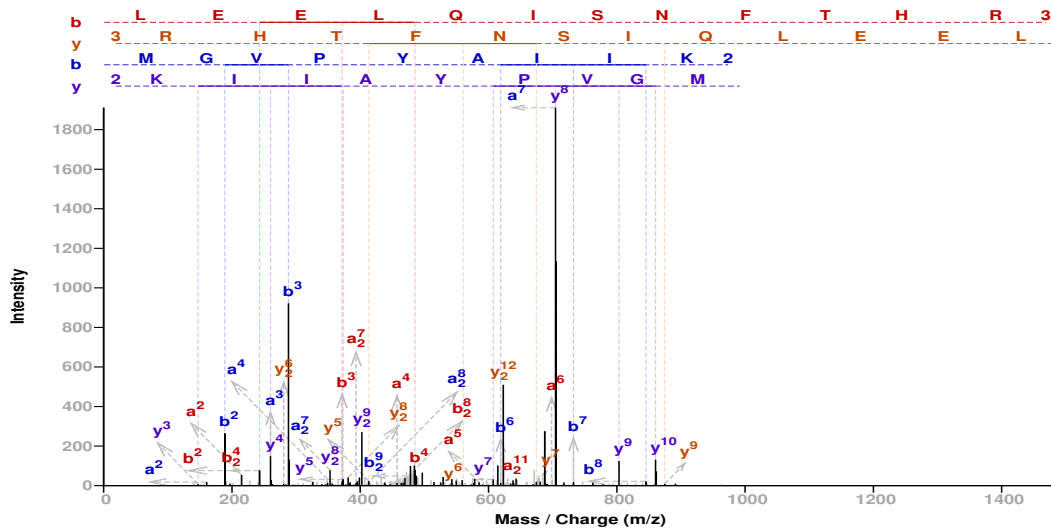

yeast01\_Scan\_Number\_2834 Precursor m/z: 520.262 cosine: 0.878  $\alpha$ : 0.308

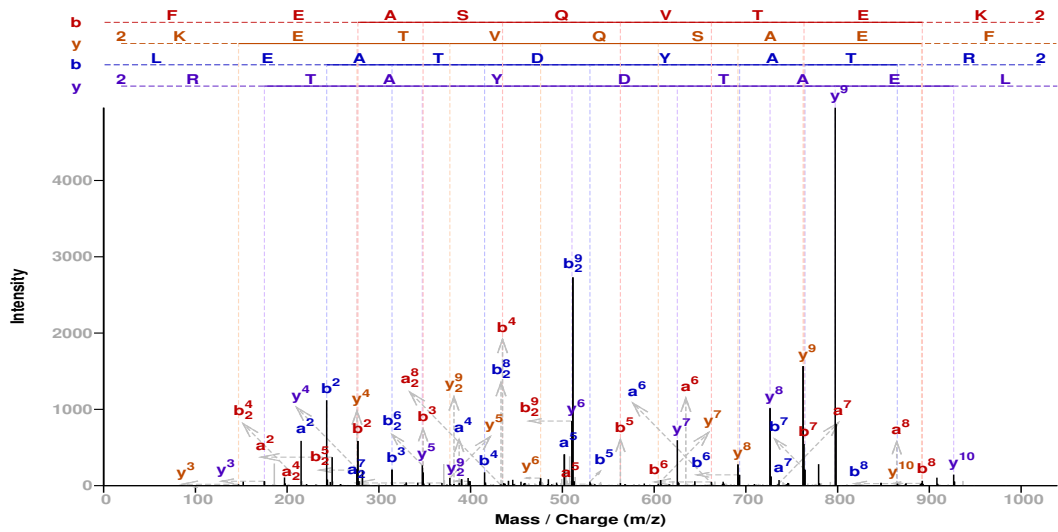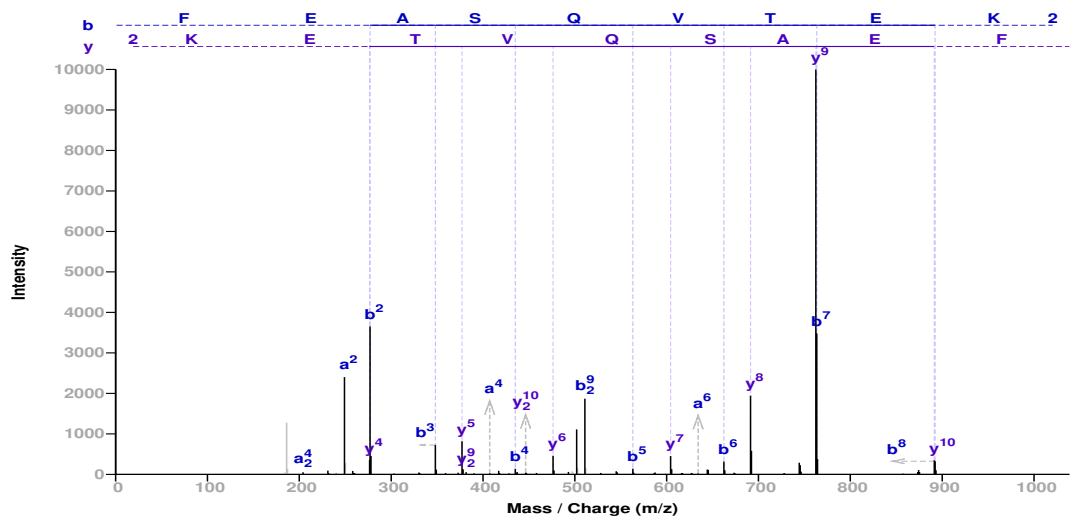

yeast01\_Scan\_Number\_4179 Precursor m/z: 605.321 cosine: 0.769  $\alpha$ : 0.300

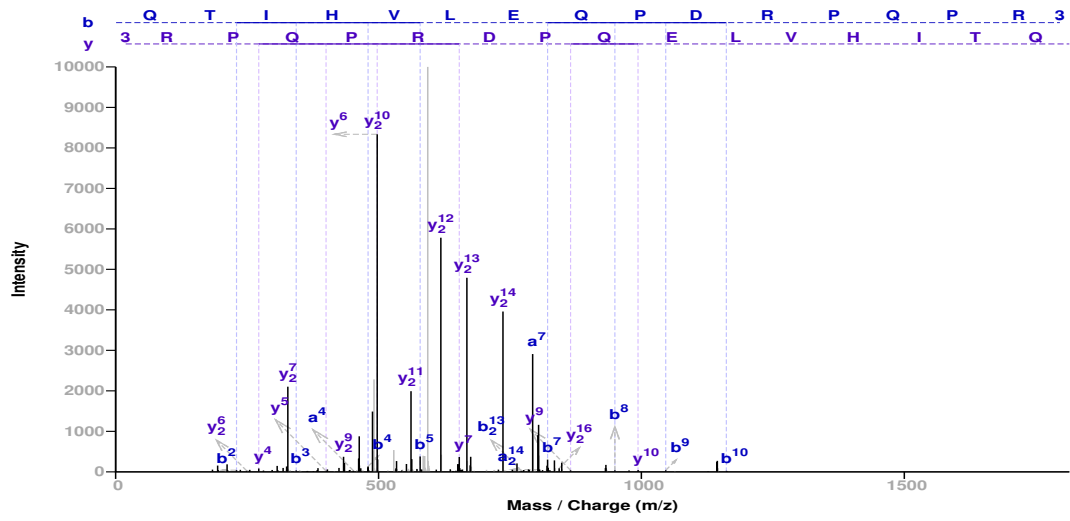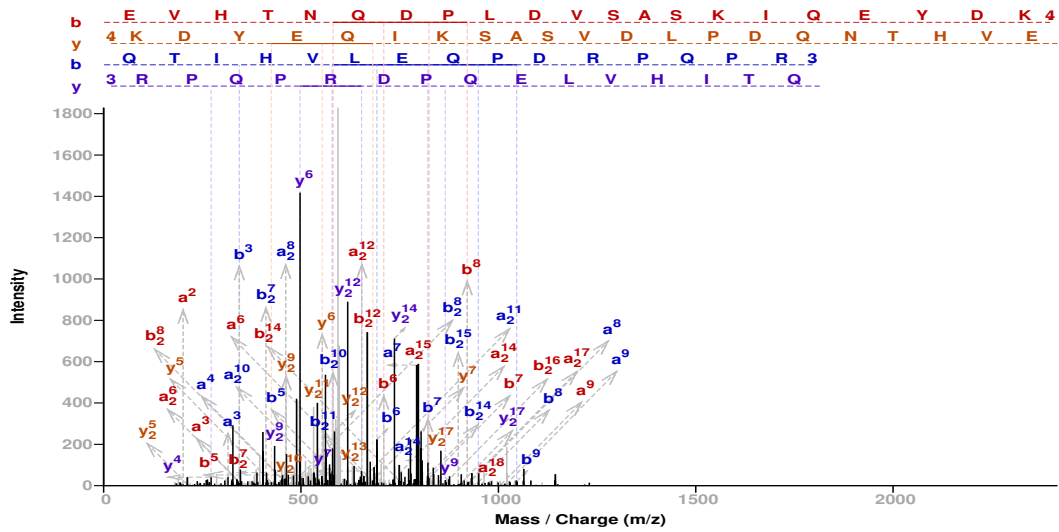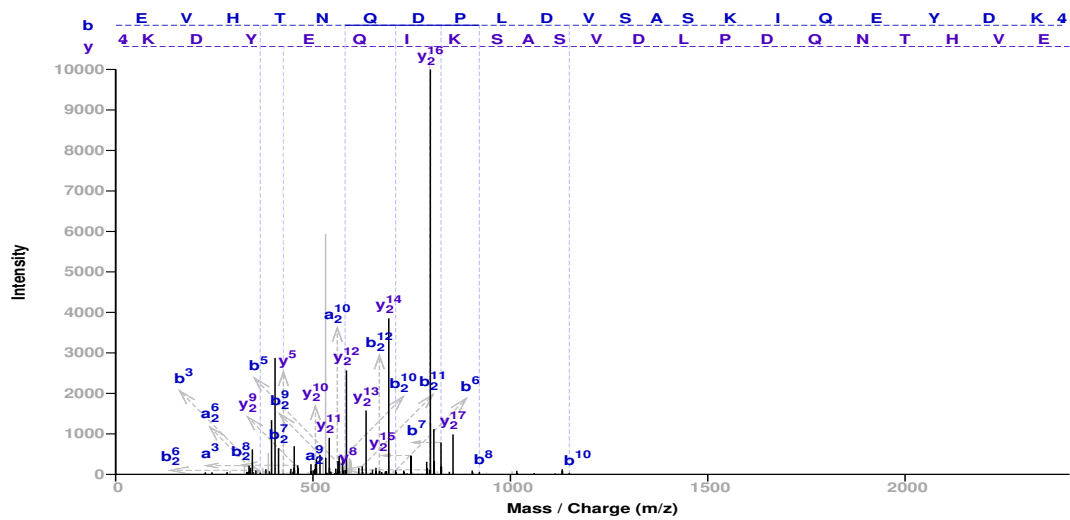

yeast01\_Scan\_Number\_1402 Precursor m/z: 374.888 cosine: 0.813  $\alpha$ : 0.299

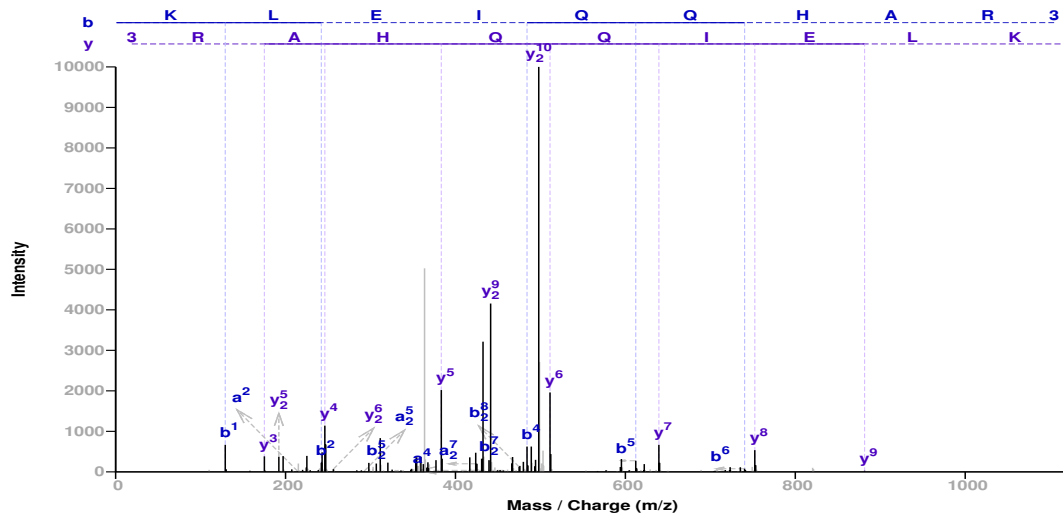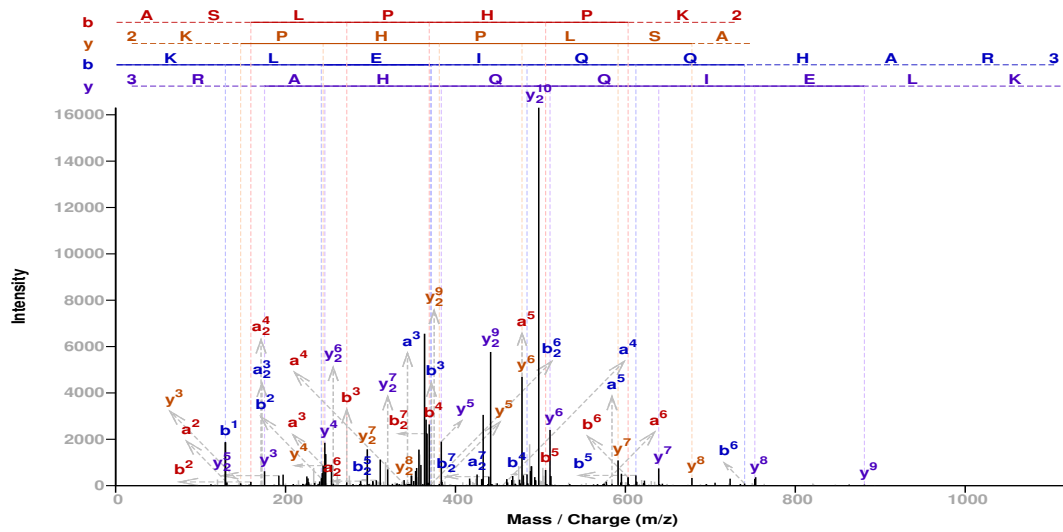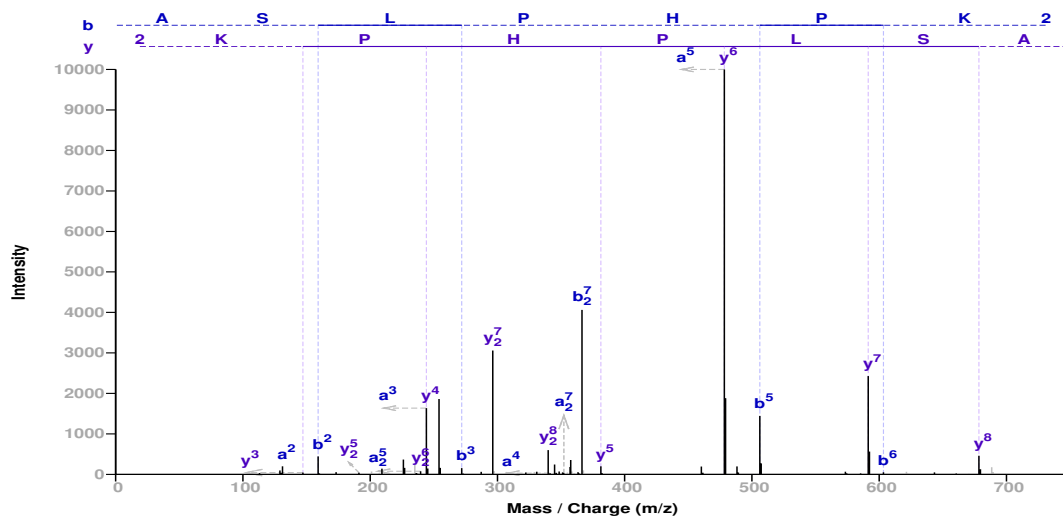

yeast01\_Scan\_Number\_2373 Precursor m/z: 380.717 cosine: 0.799  $\alpha$ : 0.298

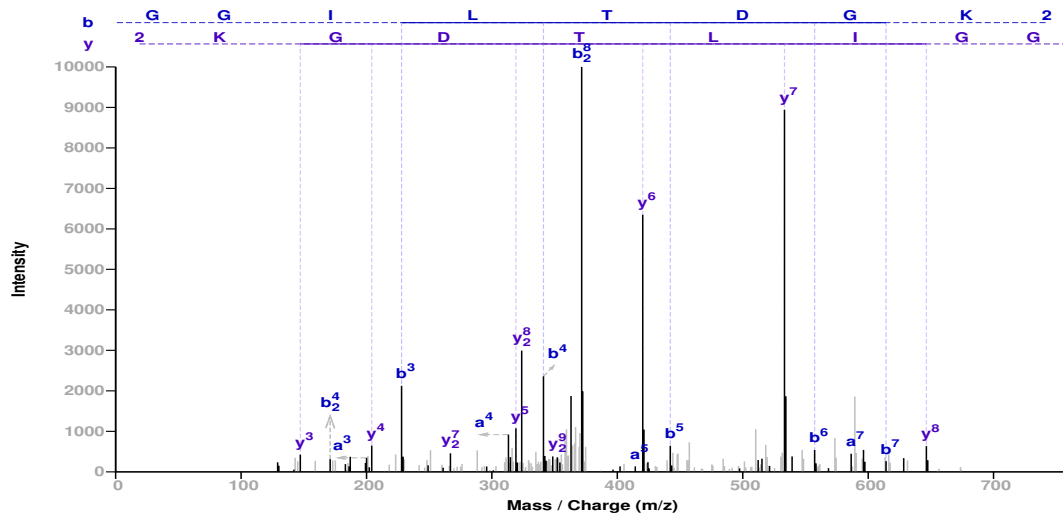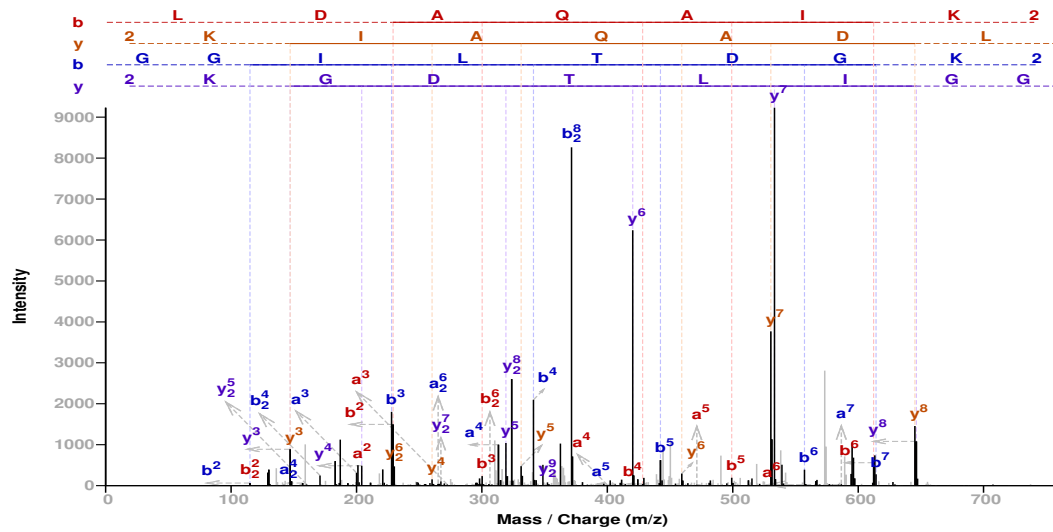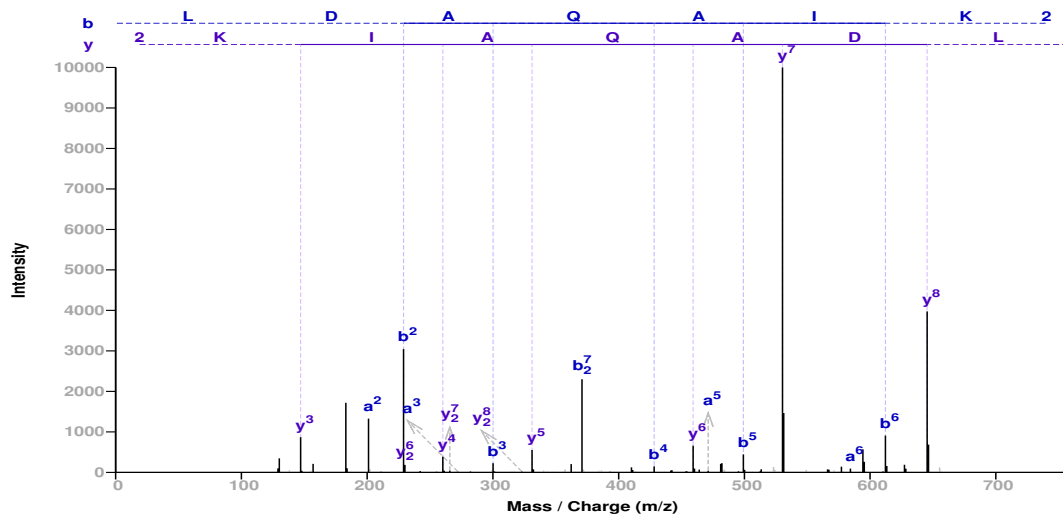

yeast01\_Scan\_Number\_7294 Precursor m/z: 449.276 cosine: 0.775  $\alpha$ : 0.298

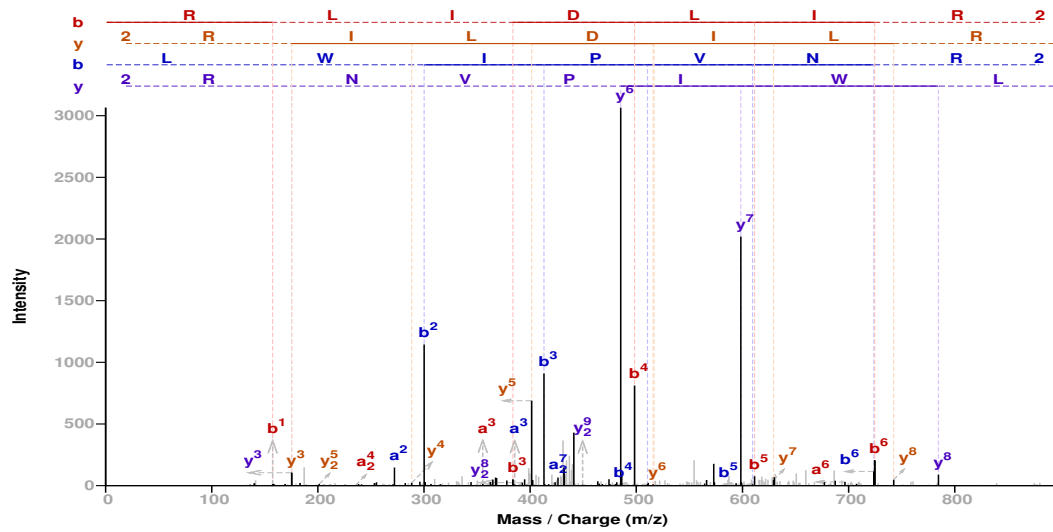



yeast01\_Scan\_Number\_7880 Precursor m/z: 860.458 cosine: 0.829  $\alpha$ : 0.297

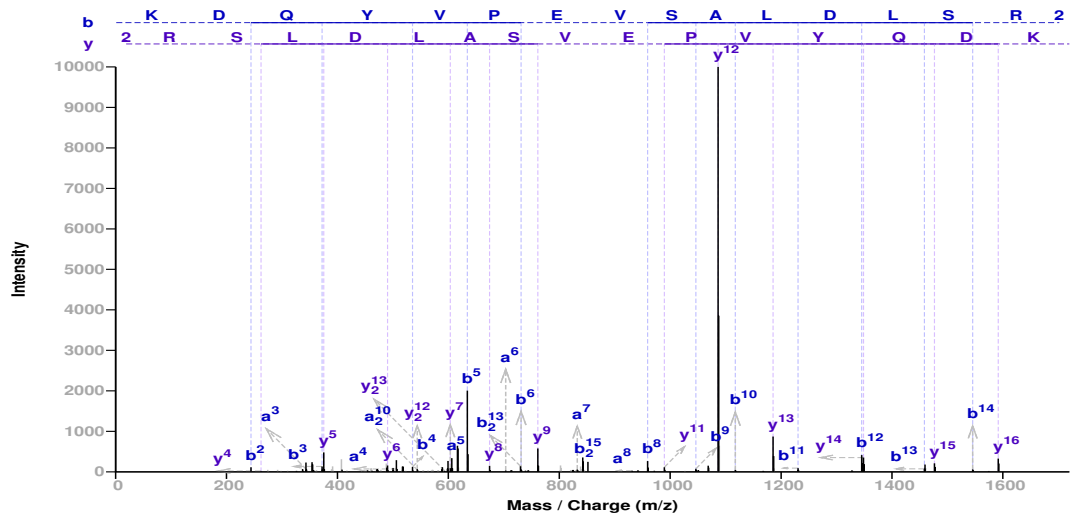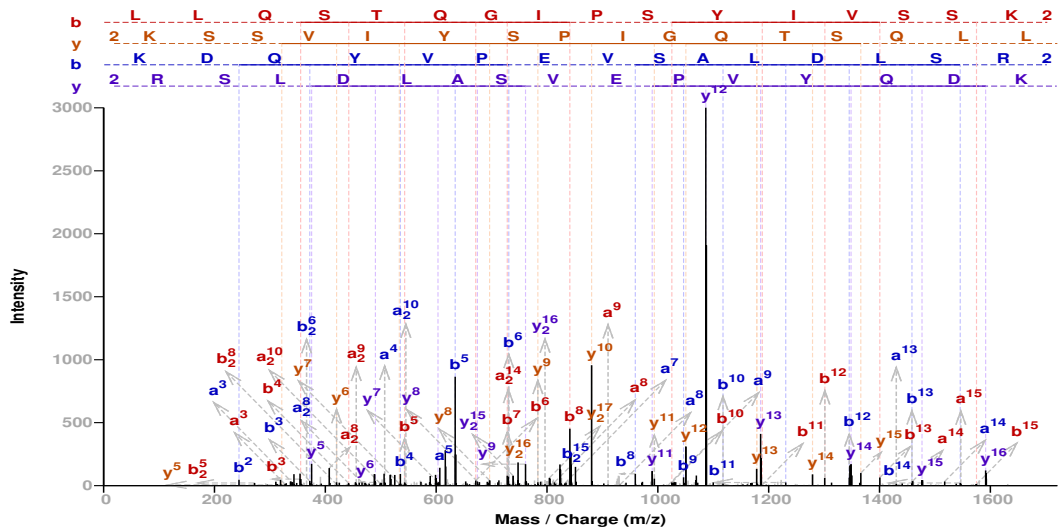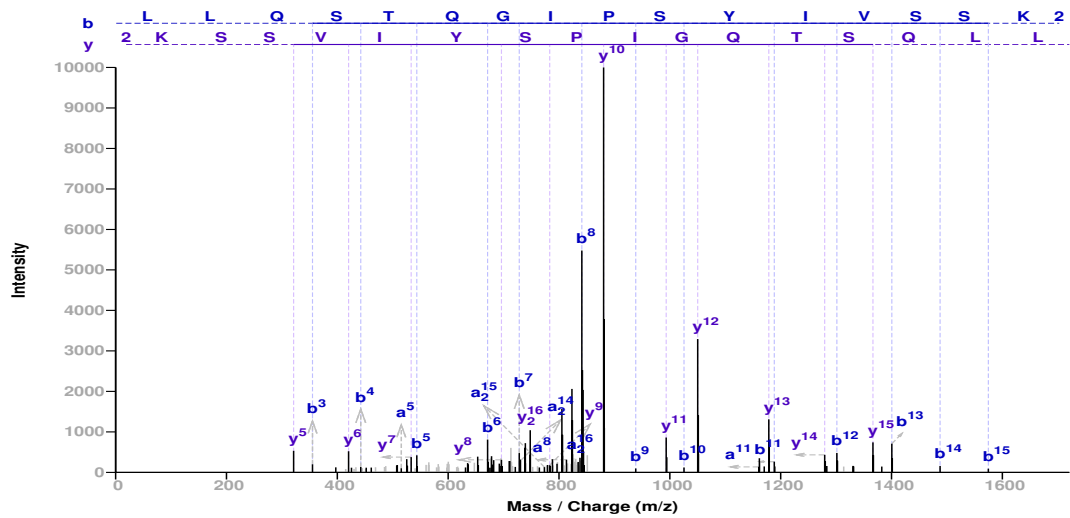

yeast01\_Scan\_Number\_3548 Precursor m/z: 548.773 cosine: 0.754  $\alpha$ : 0.297

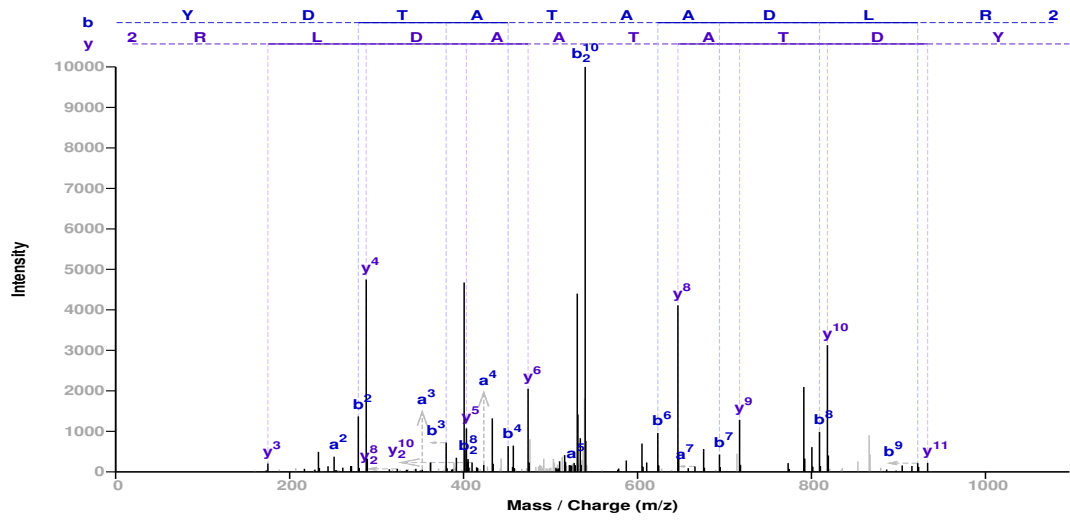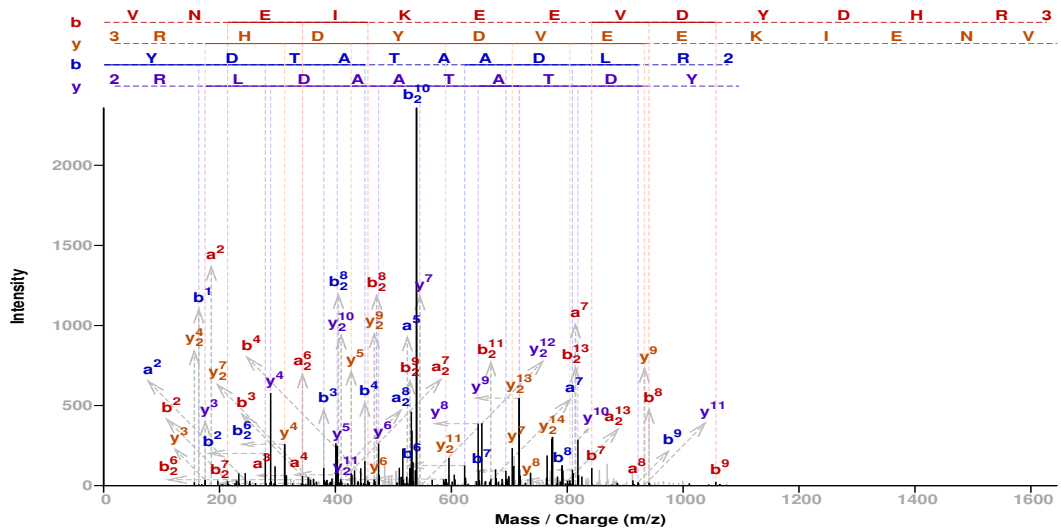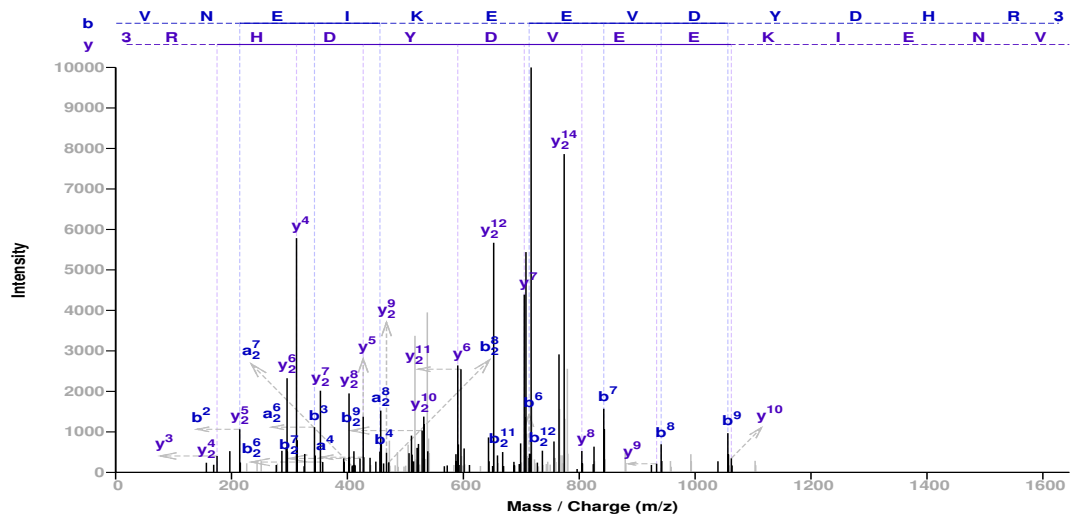

yeast01.Scan\_Number\_4278 Precursor m/z: 539.791 cosine: 0.847  $\alpha$ : 0.295

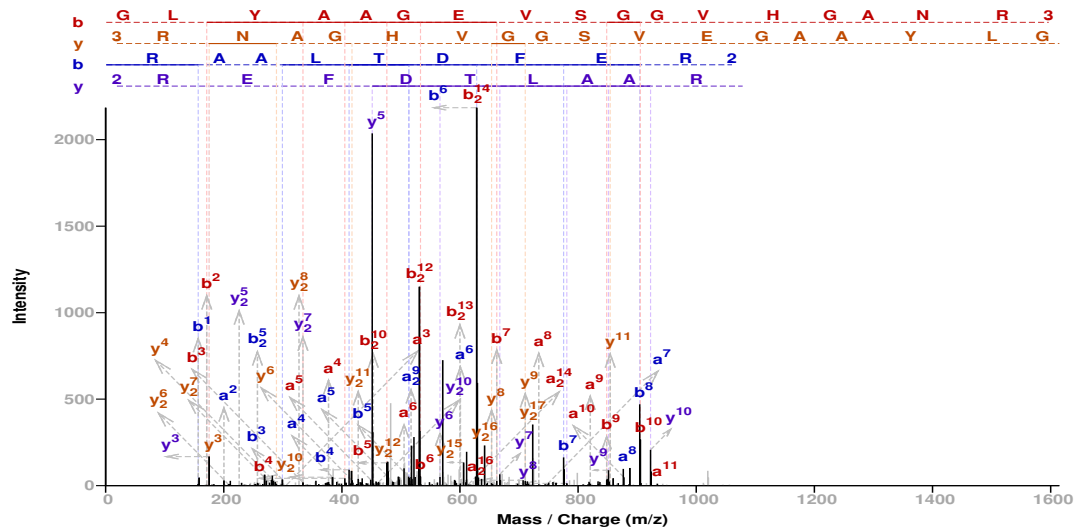

yeast01\_Scan\_Number\_2228 Precursor m/z: 508.604 cosine: 0.797  $\alpha$ : 0.293

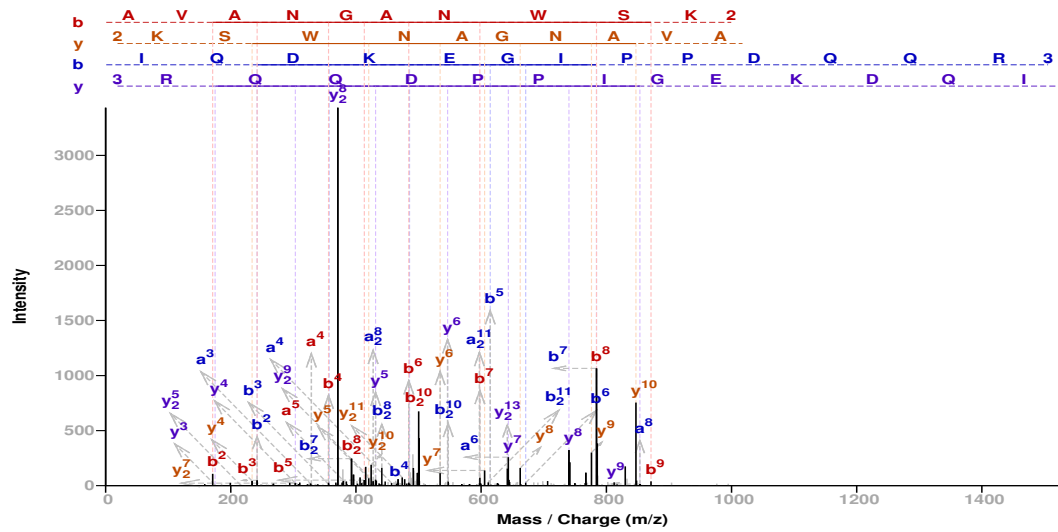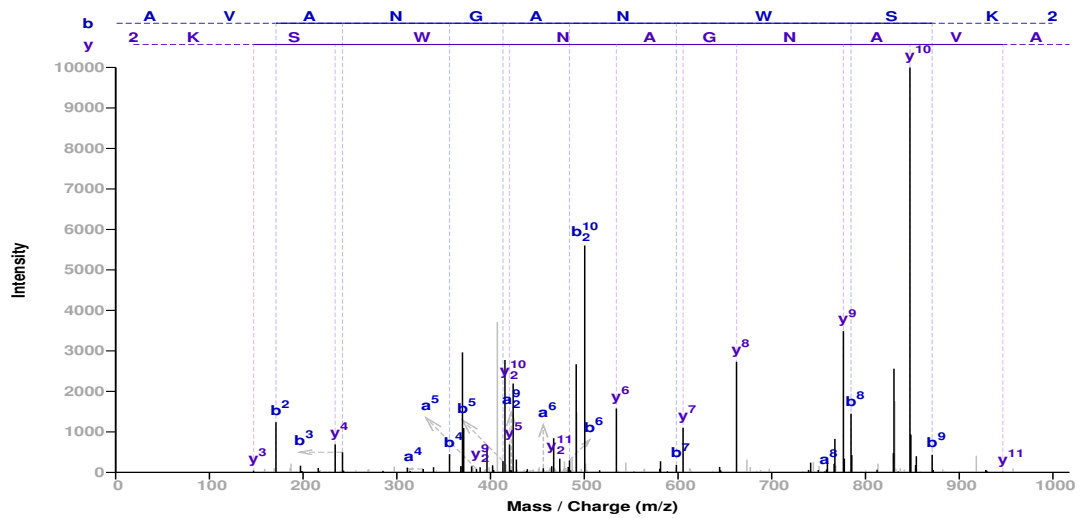



yeast01\_Scan\_Number\_5388 Precursor m/z: 435.305 cosine: 0.921  $\alpha$ : 0.287

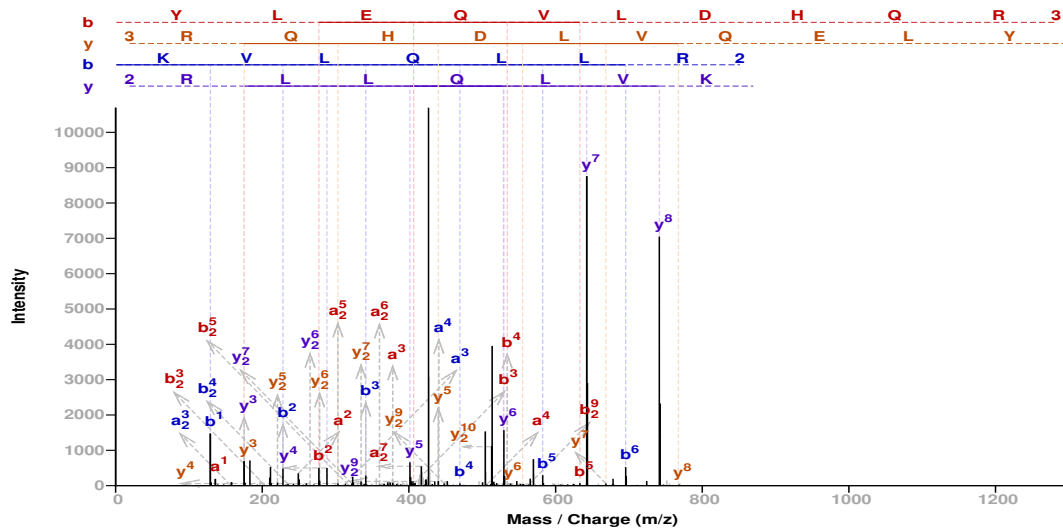

yeast01\_Scan\_Number\_7851 Precursor m/z: 593.338 cosine: 0.897  $\alpha$ : 0.287

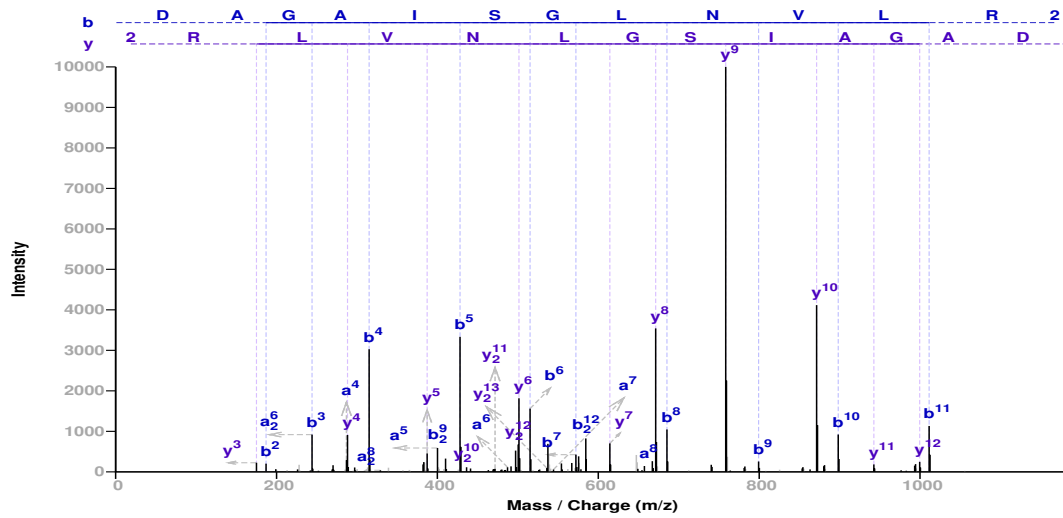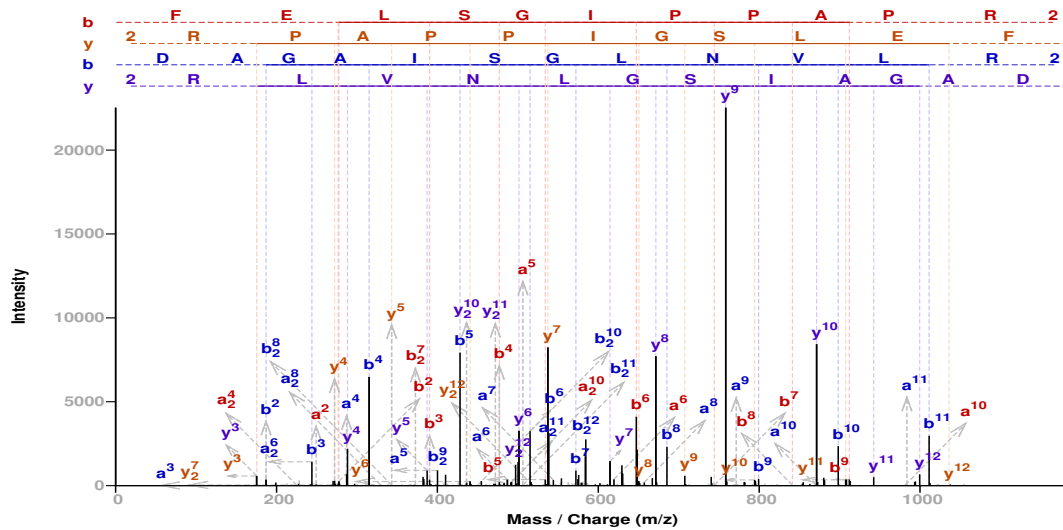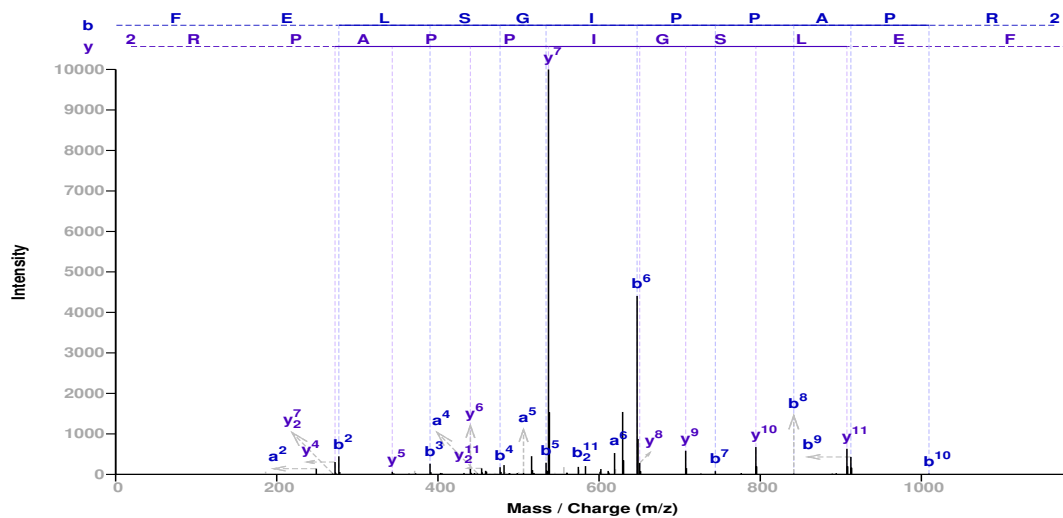

yeast01\_Scan\_Number\_5318 Precursor m/z: 581.802 cosine: 0.859  $\alpha$ : 0.281

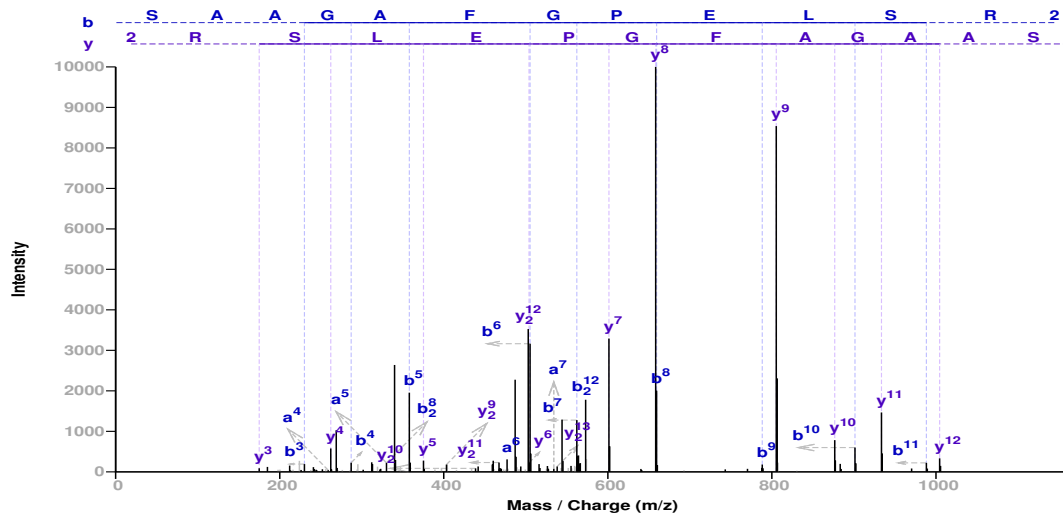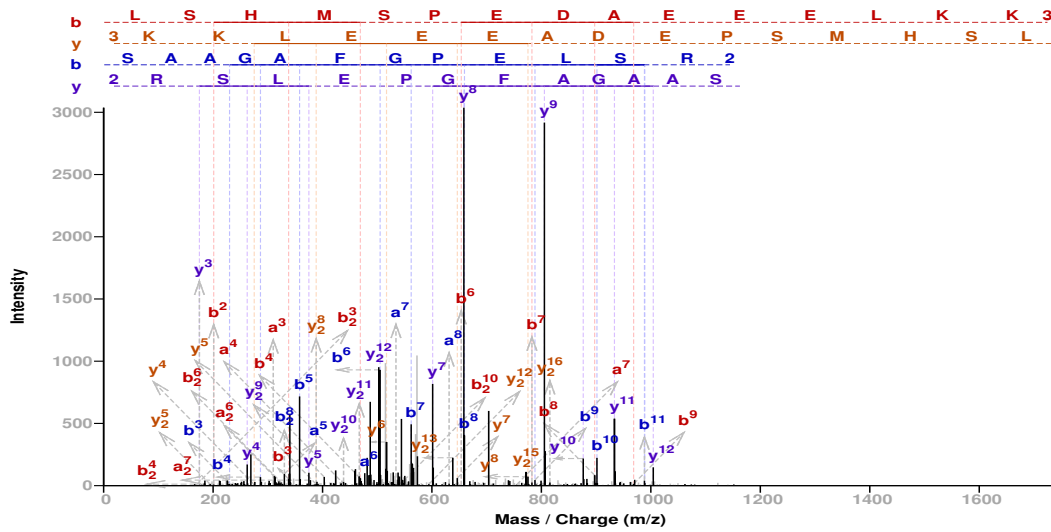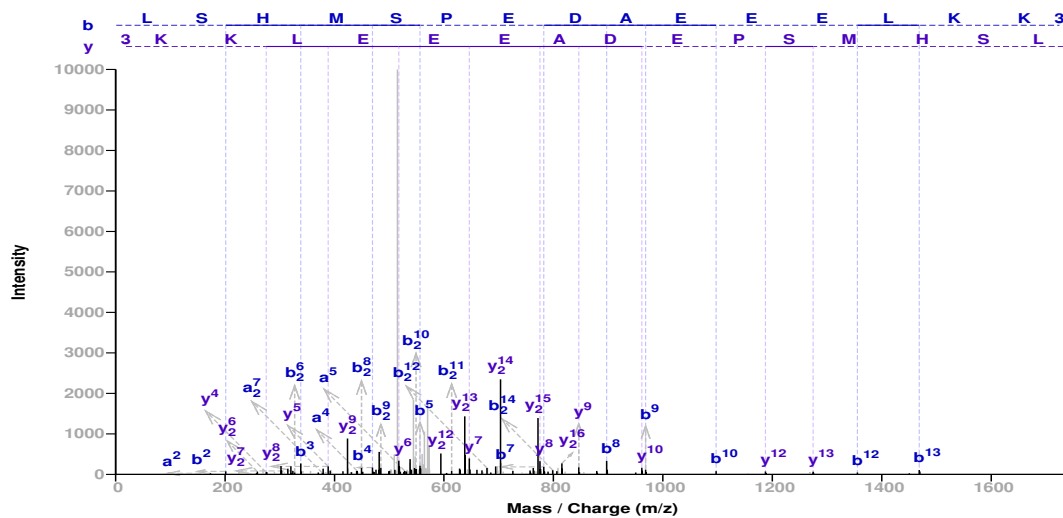



yeast01\_Scan\_Number\_5651 Precursor m/z: 489.774 cosine: 0.803  $\alpha$ : 0.281

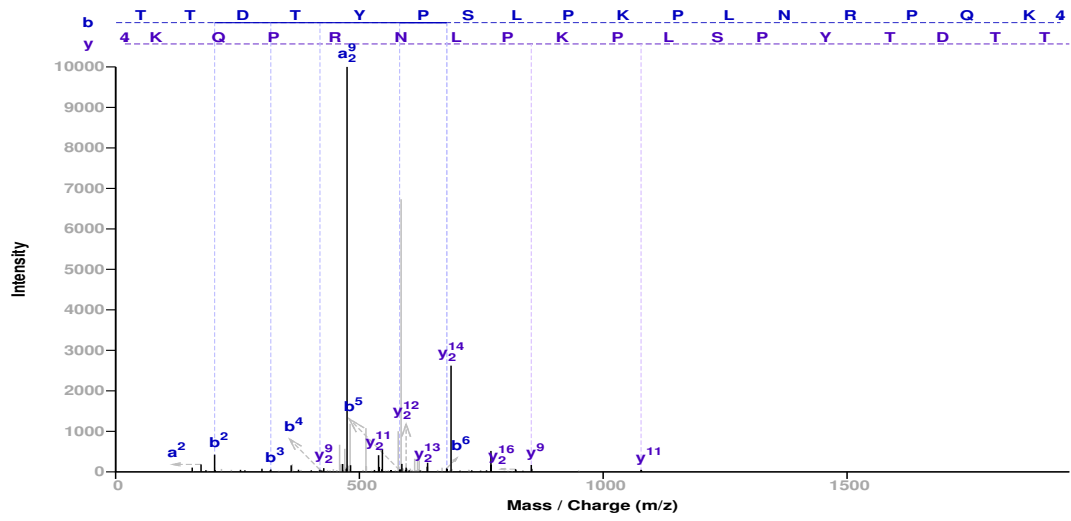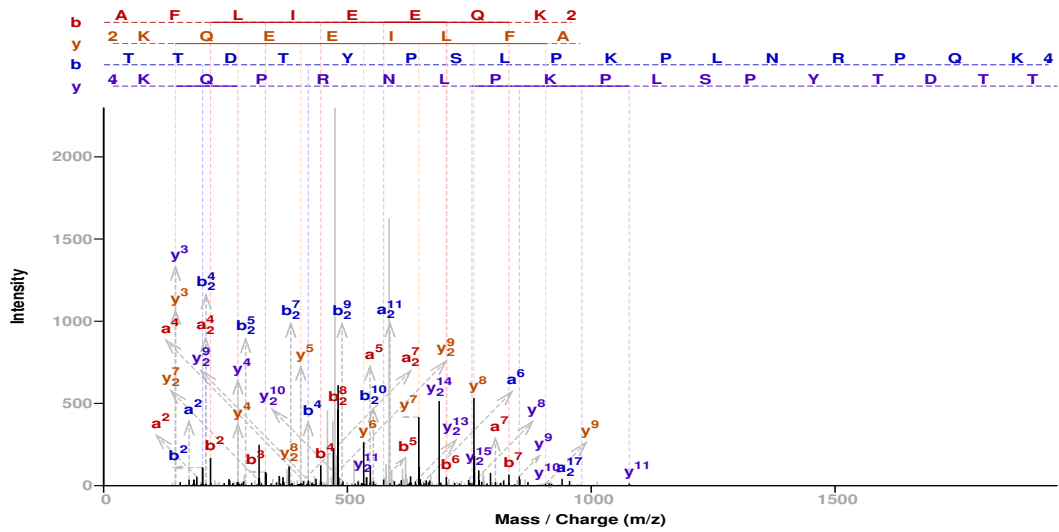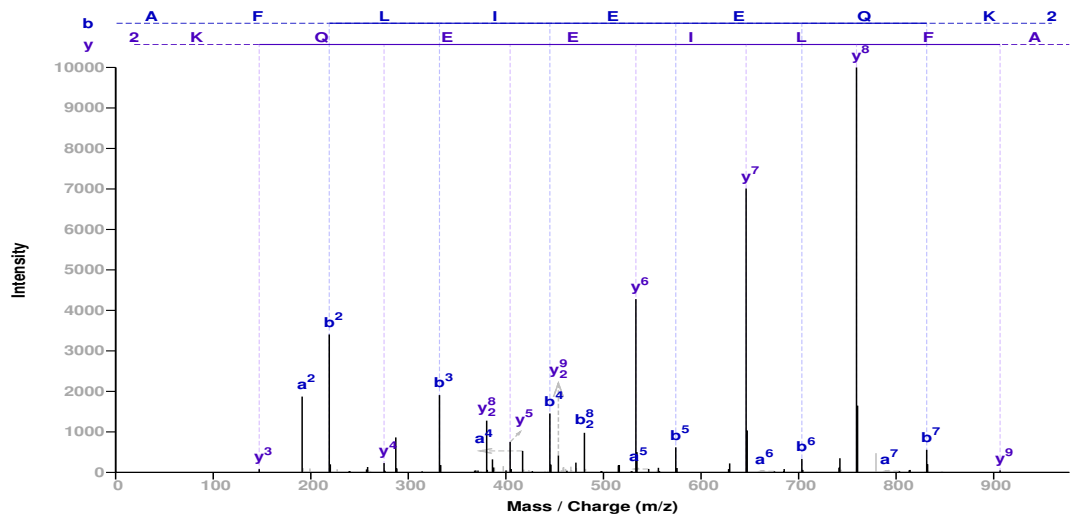

yeast01\_Scan\_Number\_9034 Precursor m/z: 498.813 cosine: 0.775  $\alpha$ : 0.279

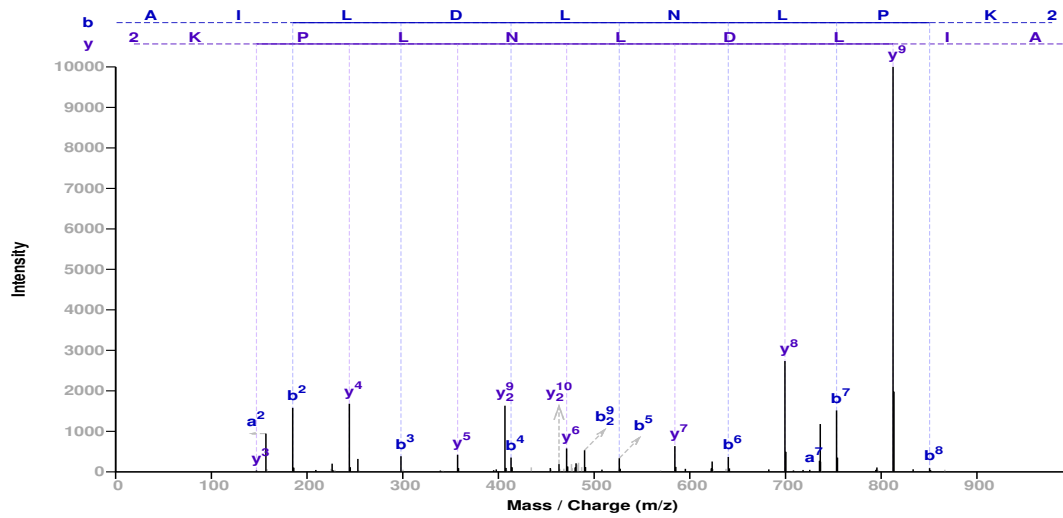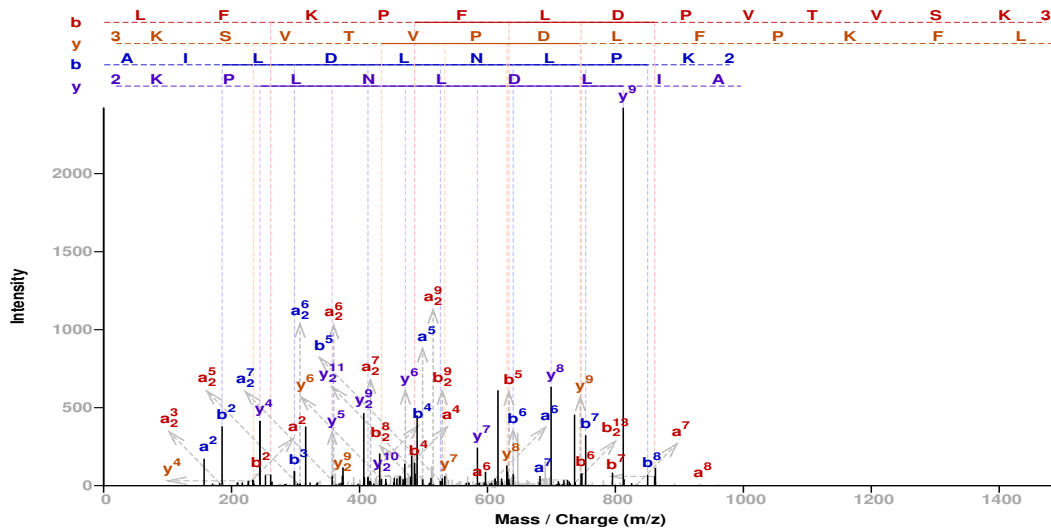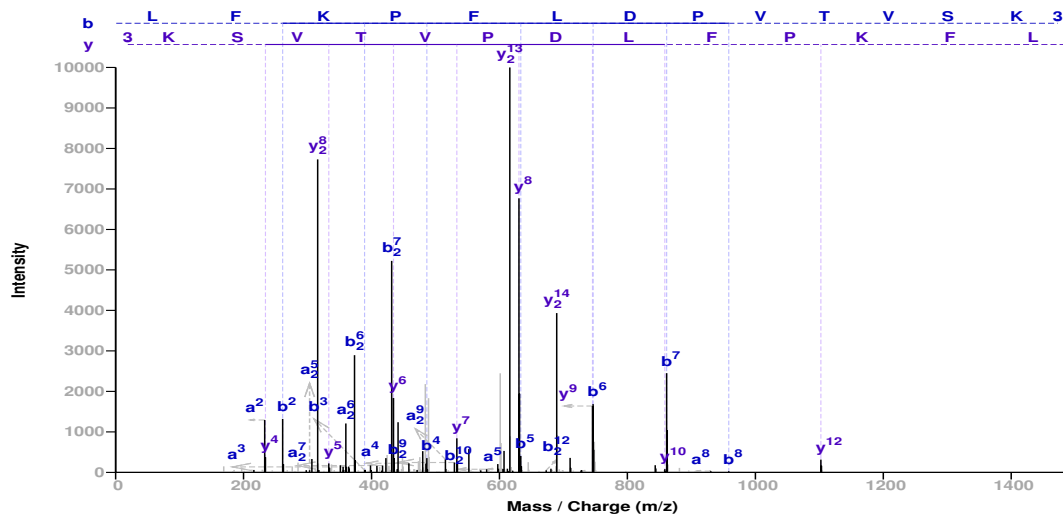

yeast01\_Scan\_Number\_2260 Precursor m/z: 509.264 cosine: 0.779  $\alpha$ : 0.277

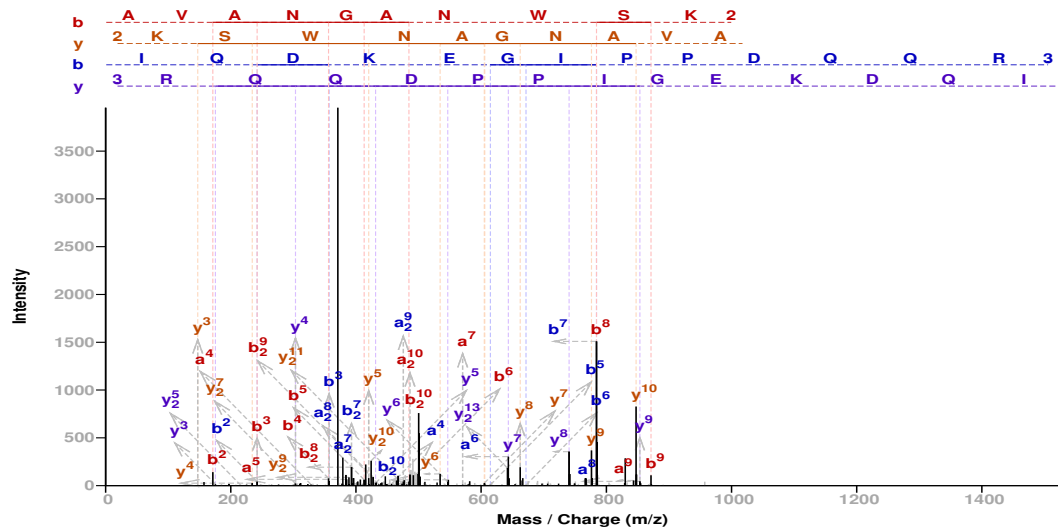

yeast01\_Scan\_Number\_7265 Precursor m/z: 562.832 cosine: 0.771  $\alpha$ : 0.276

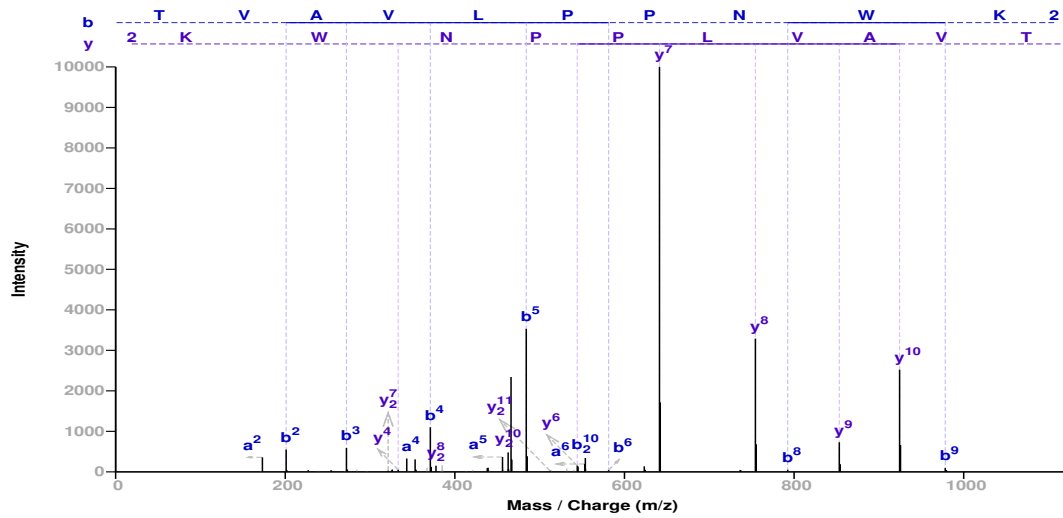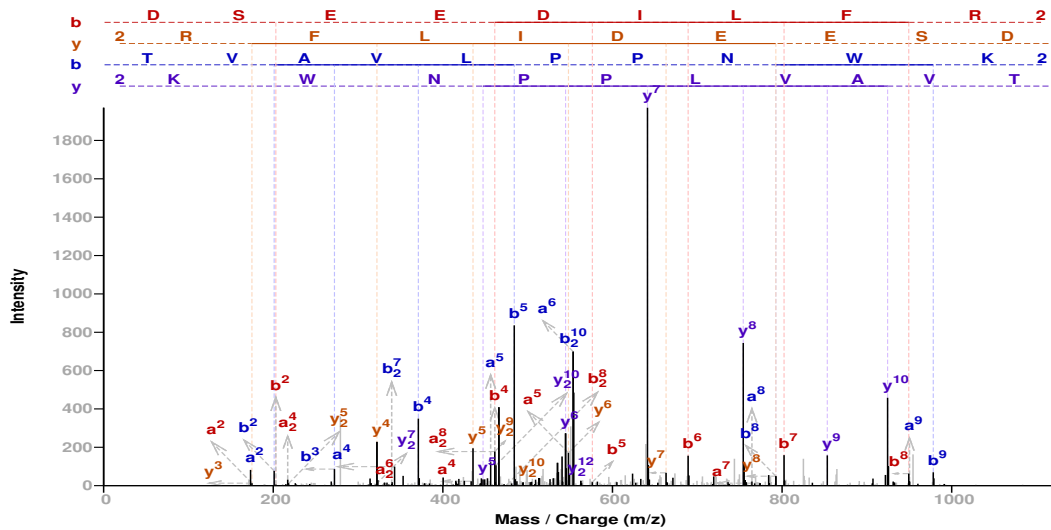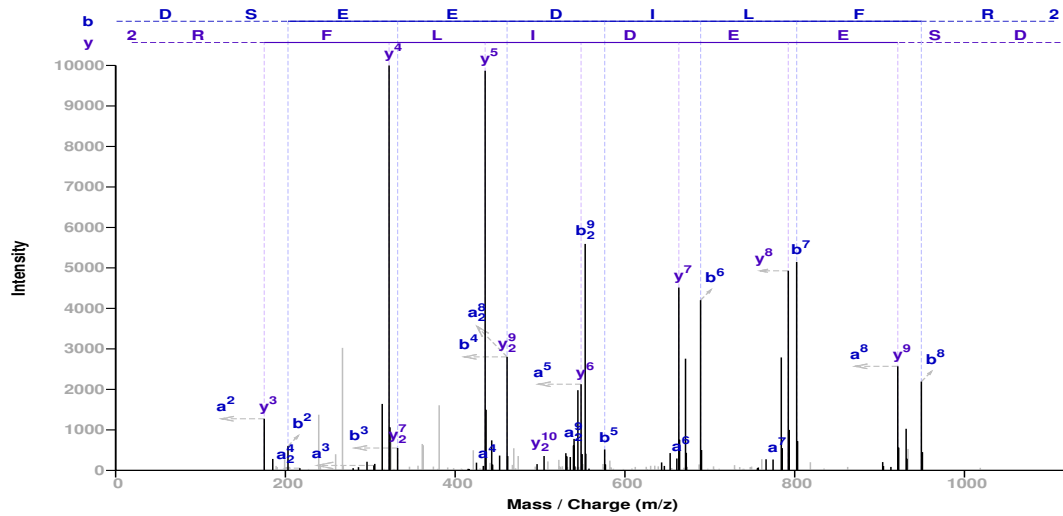

yeast01\_Scan\_Number\_4654 Precursor m/z: 714.854 cosine: 0.844  $\alpha$ : 0.275

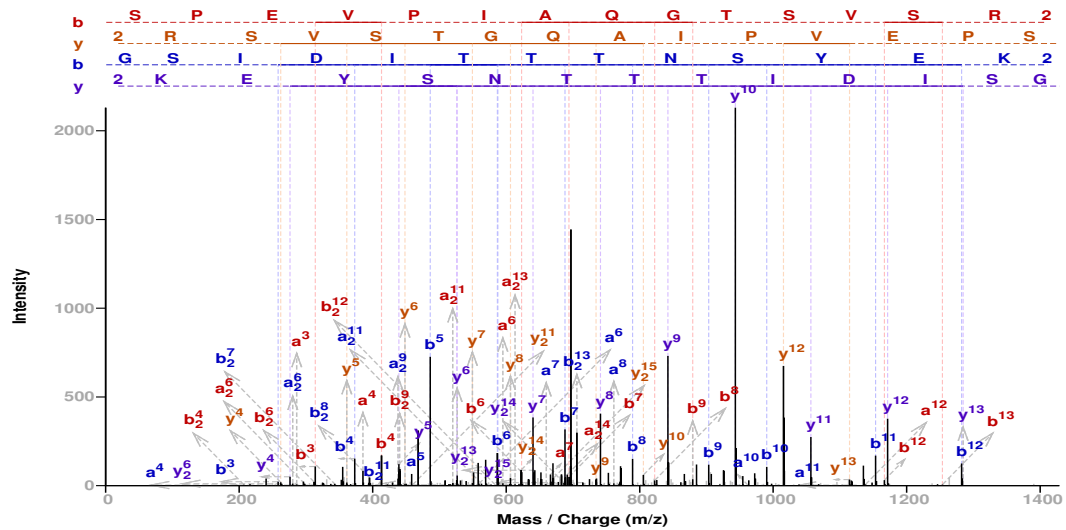

yeast01\_Scan\_Number\_3668 Precursor m/z: 723.375 cosine: 0.750  $\alpha$ : 0.269

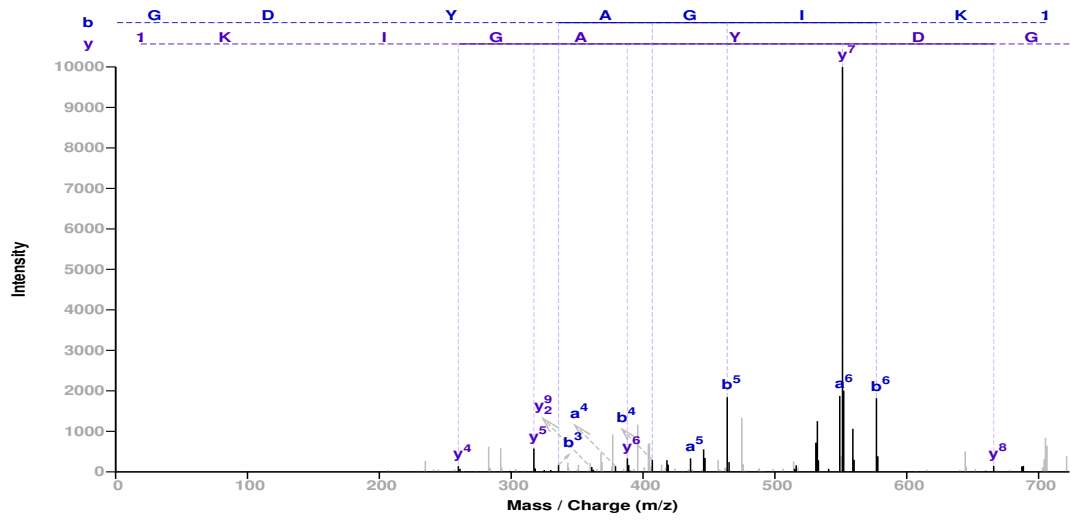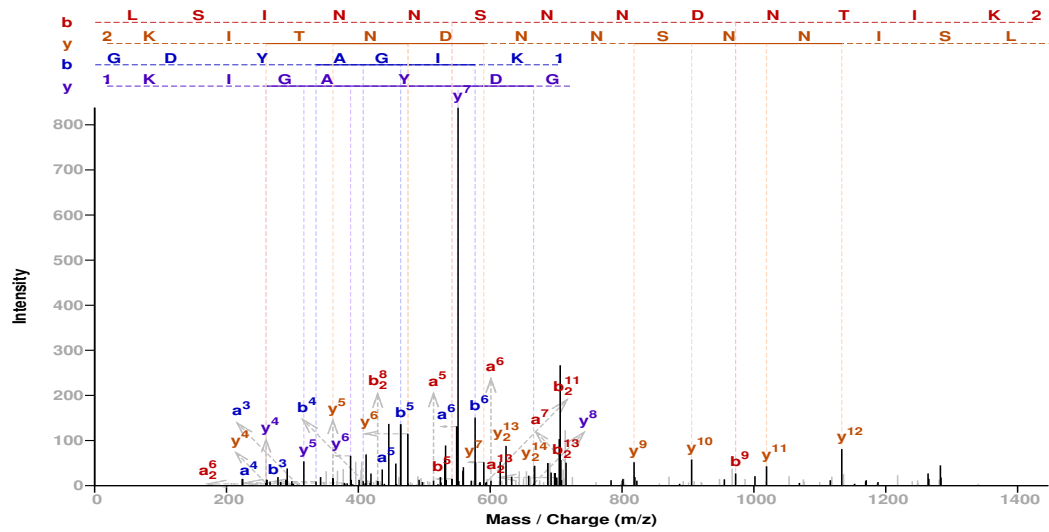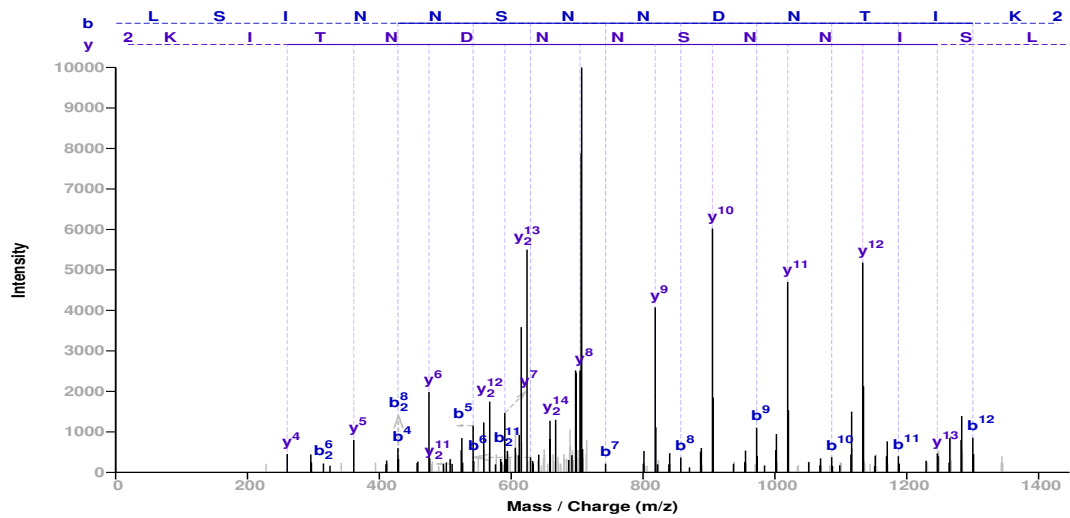

yeast01\_Scan\_Number\_6271 Precursor m/z: 539.804 cosine: 0.798  $\alpha$ : 0.267

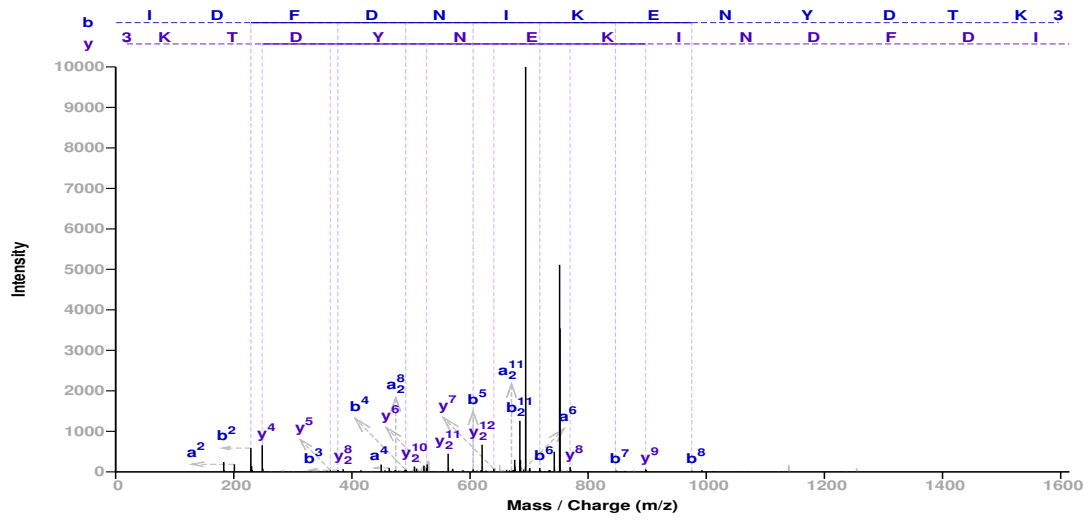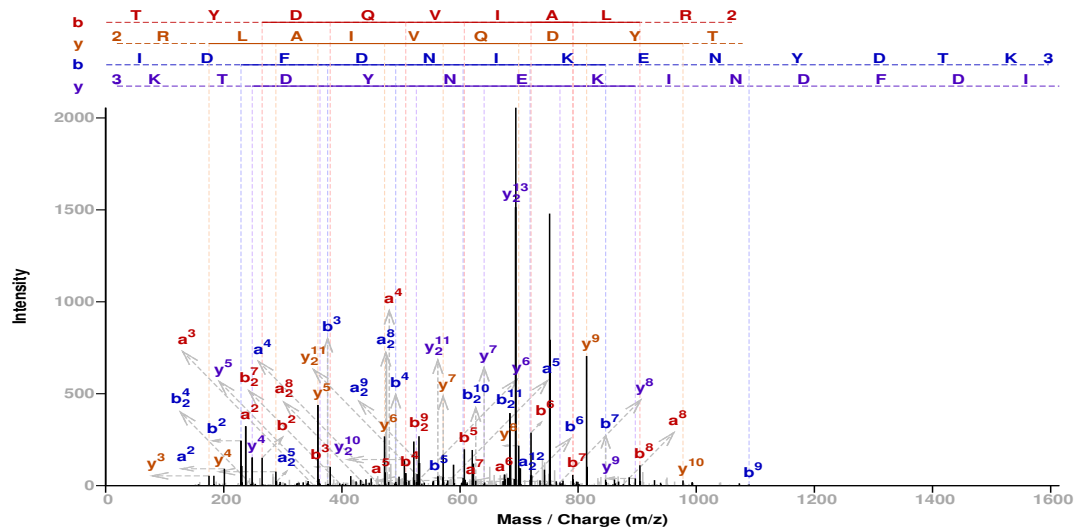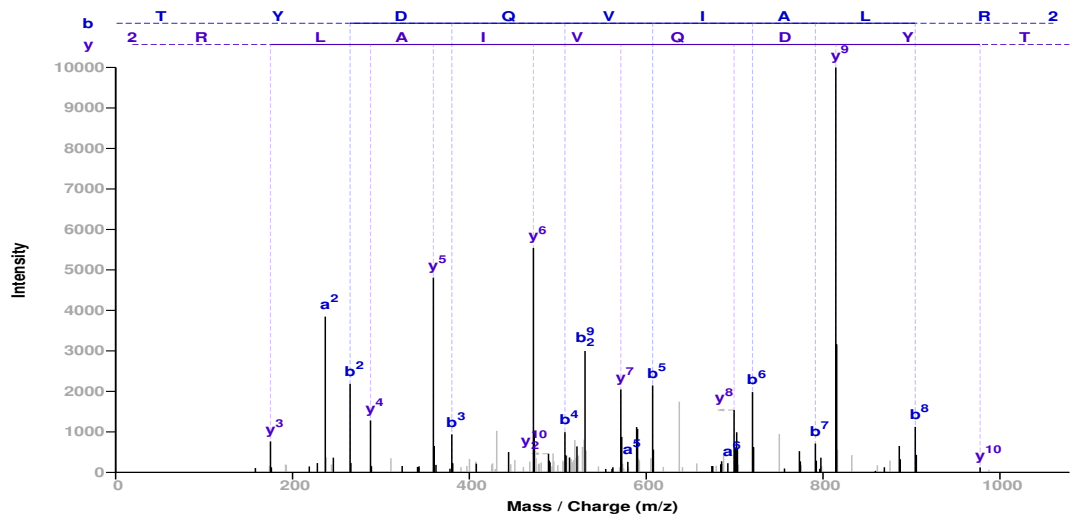

yeast01\_Scan\_Number\_4113 Precursor m/z: 627.829 cosine: 0.758  $\alpha$ : 0.267

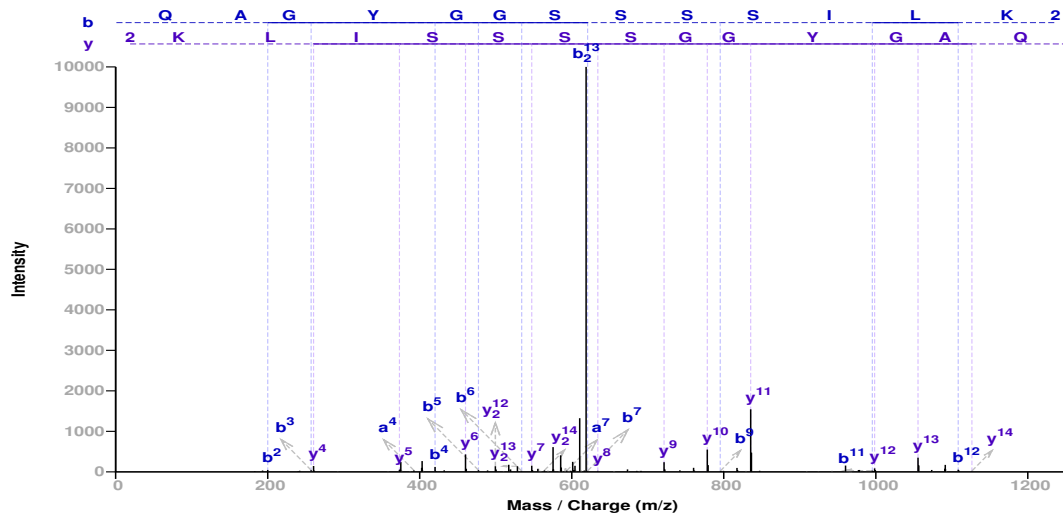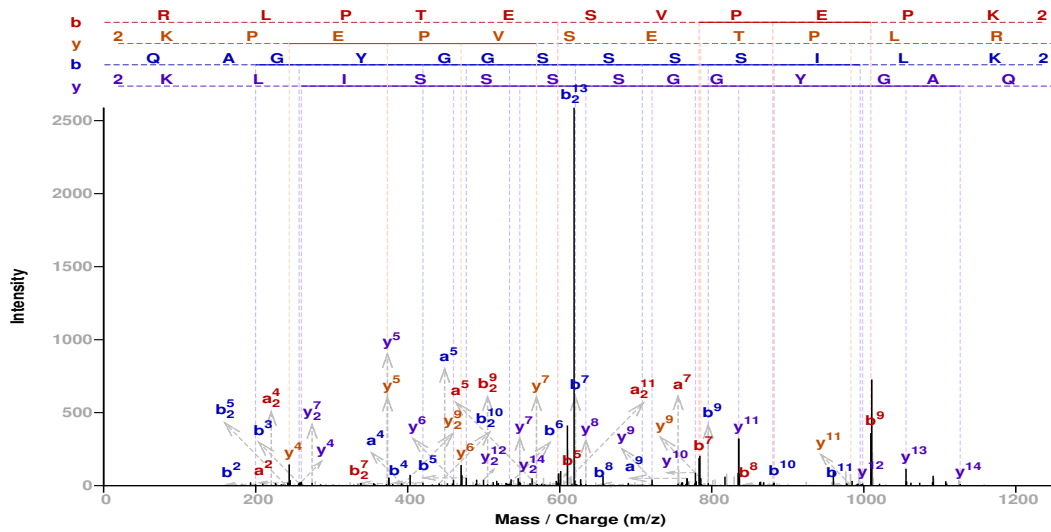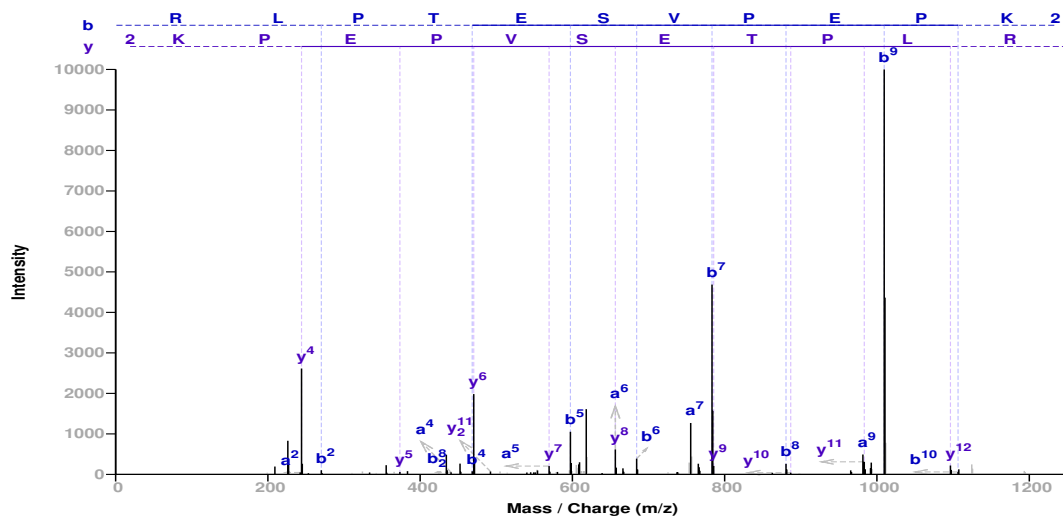



yeast01\_Scan\_Number\_9087 Precursor m/z: 826.963 cosine: 0.803  $\alpha$ : 0.265

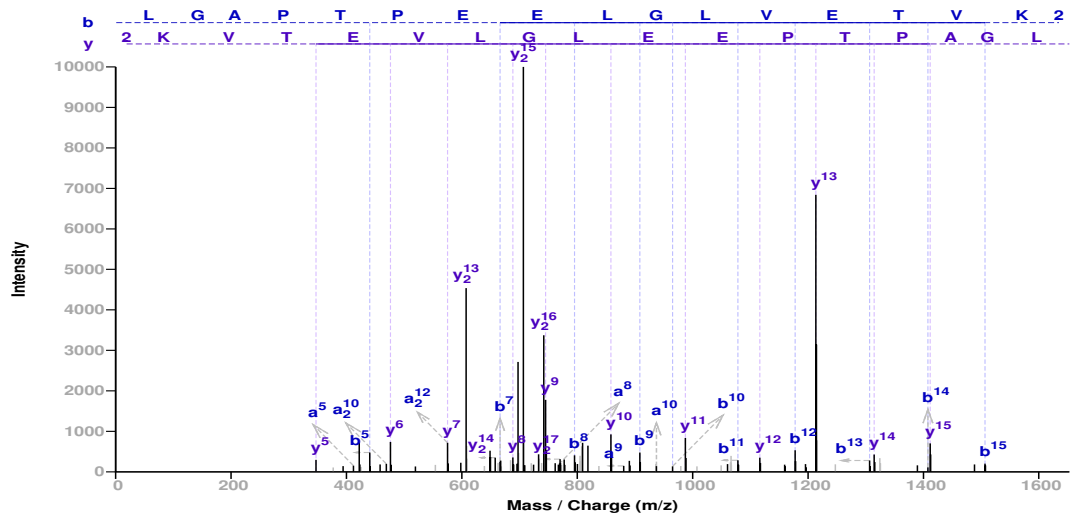

yeast01\_Scan\_Number\_3974 Precursor m/z: 635.355 cosine: 0.883  $\alpha$ : 0.262

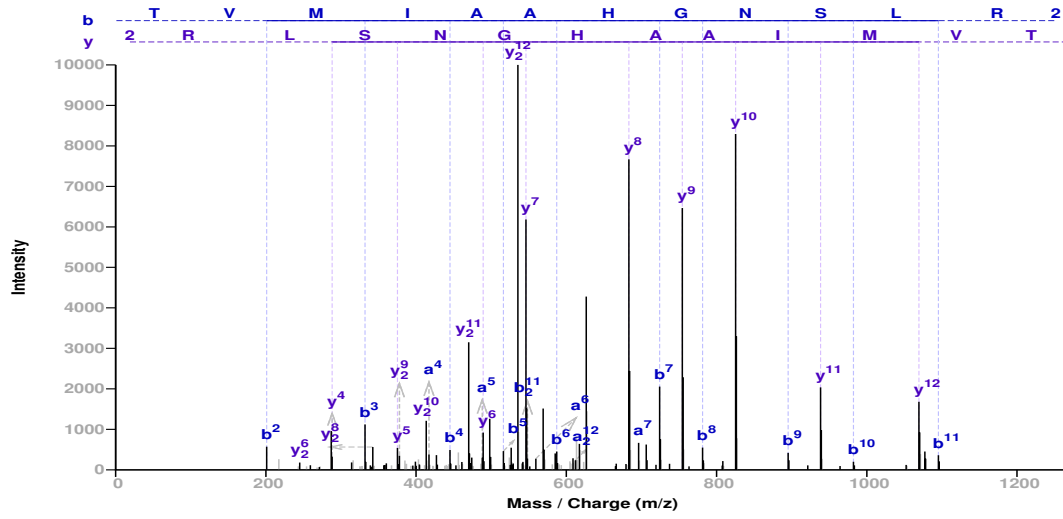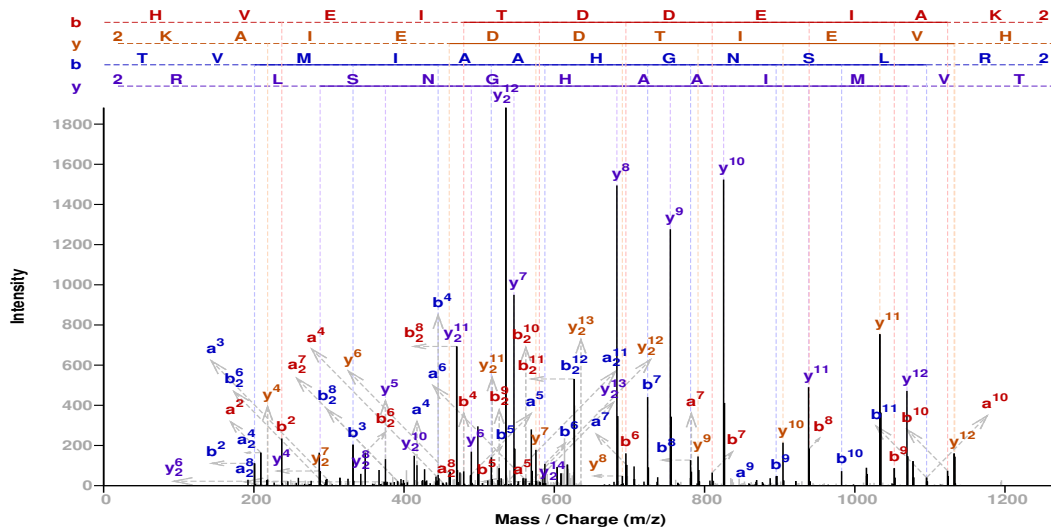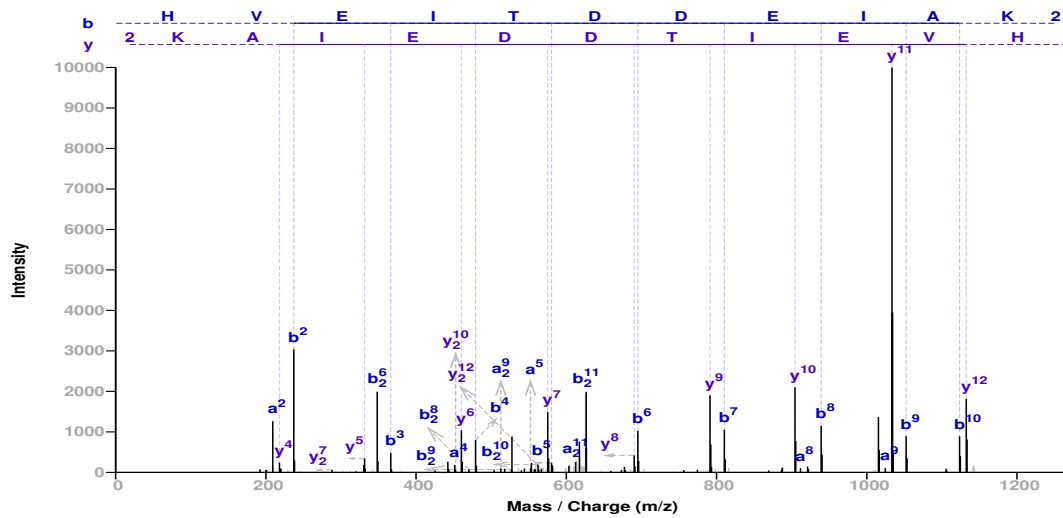

yeast01\_Scan\_Number\_6211 Precursor m/z: 616.342 cosine: 0.815  $\alpha$ : 0.256

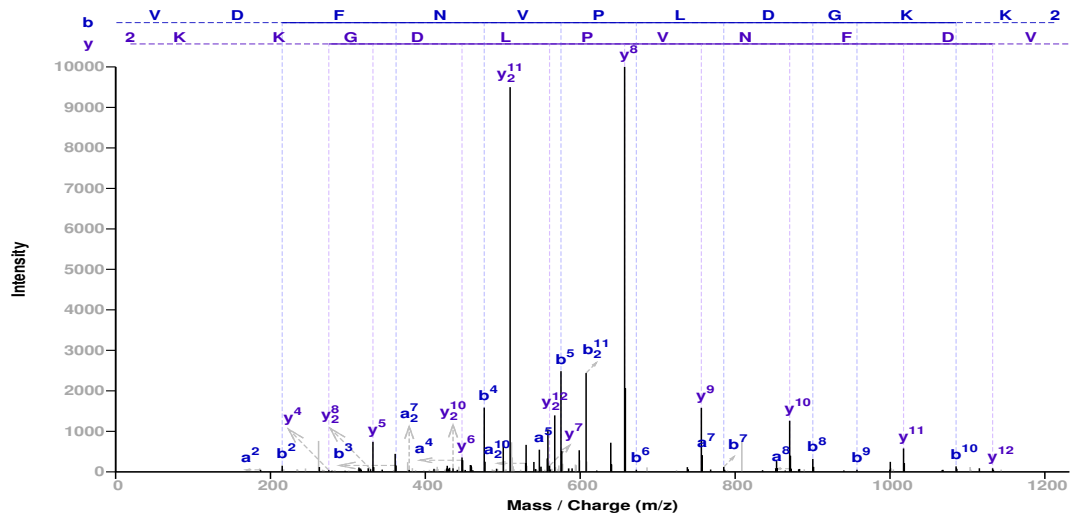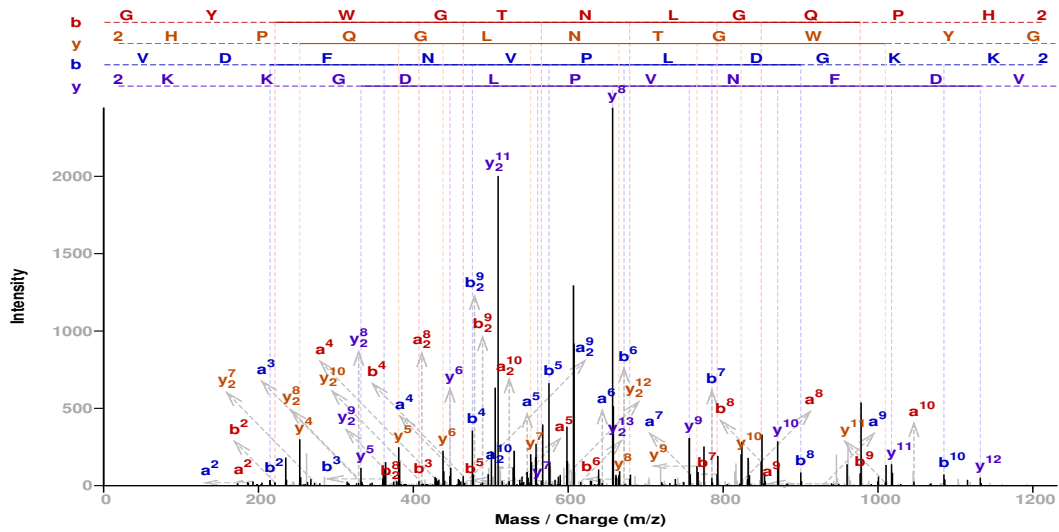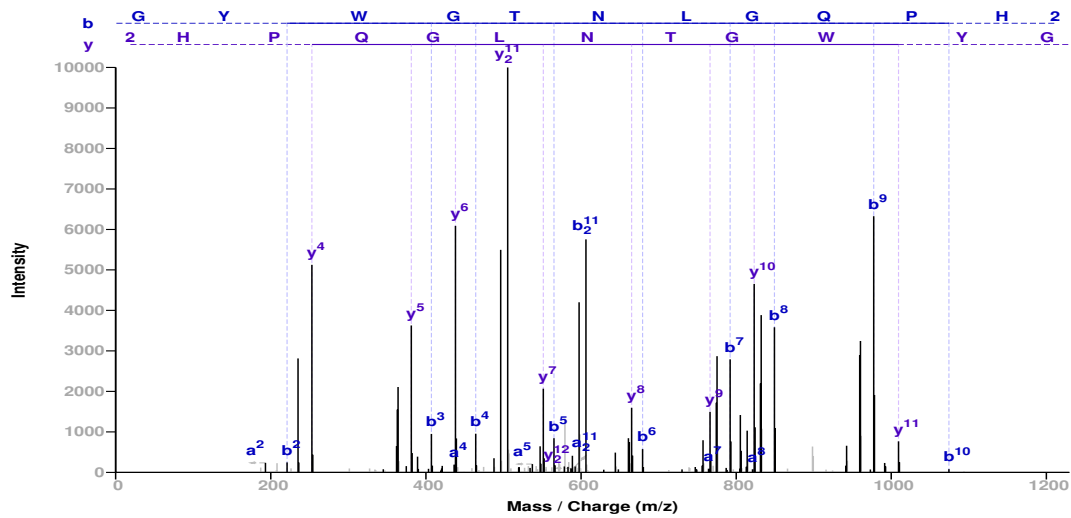

yeast01\_Scan\_Number\_3095 Precursor m/z: 423.899 cosine: 0.926  $\alpha$ : 0.252

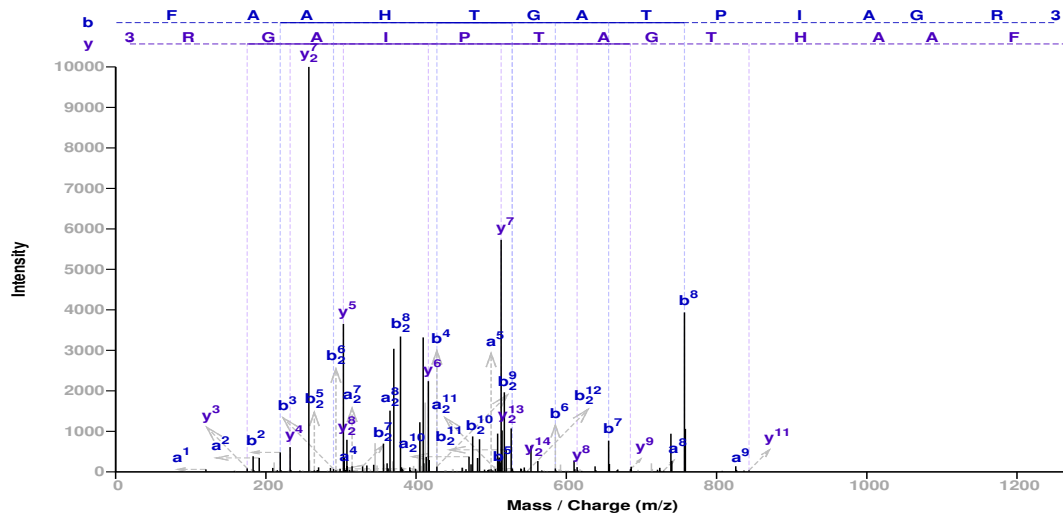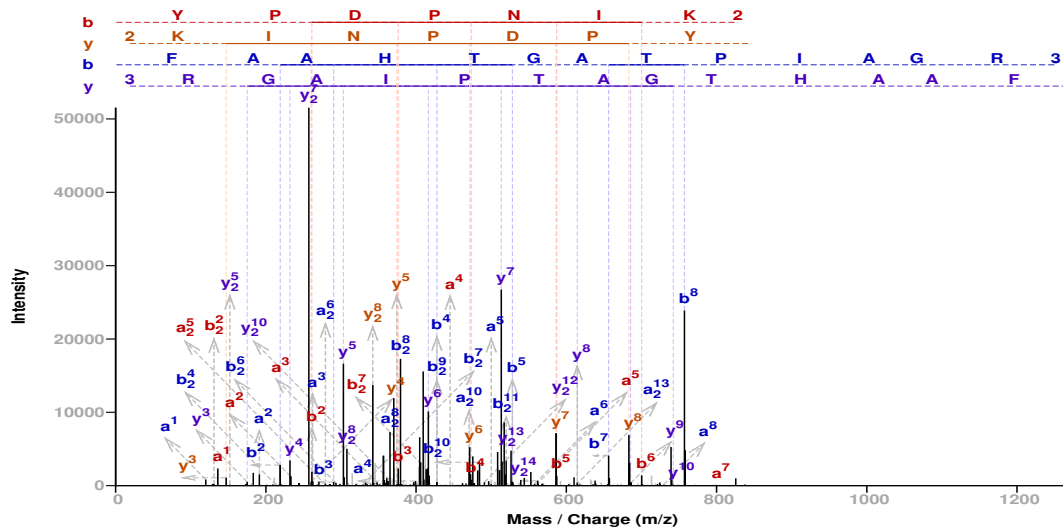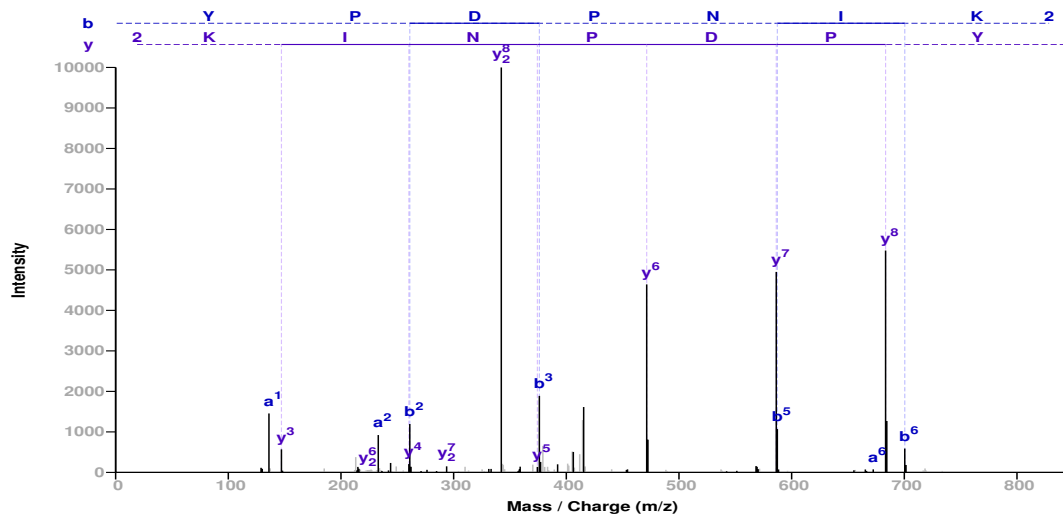

yeast01\_Scan\_Number\_1839 Precursor m/z: 396.702 cosine: 0.880  $\alpha$ : 0.246

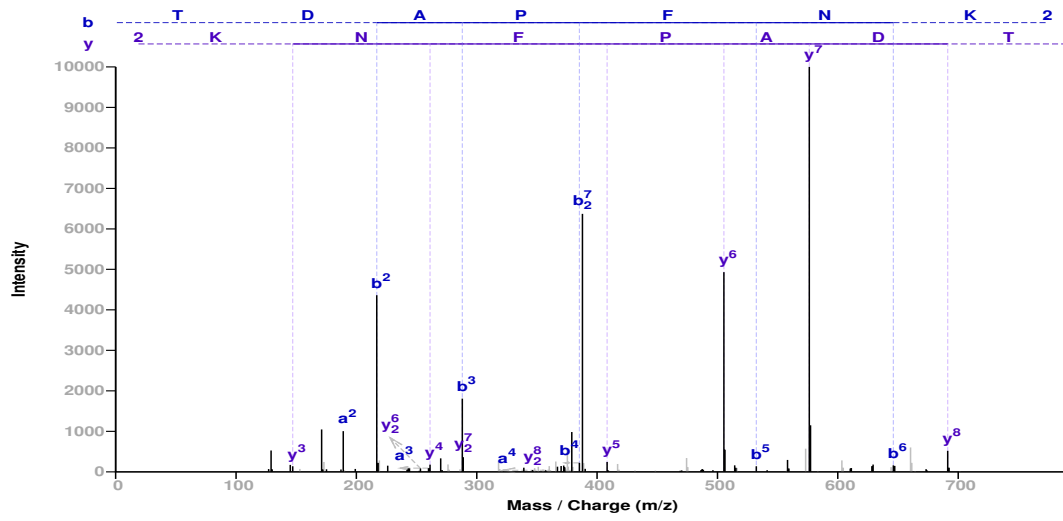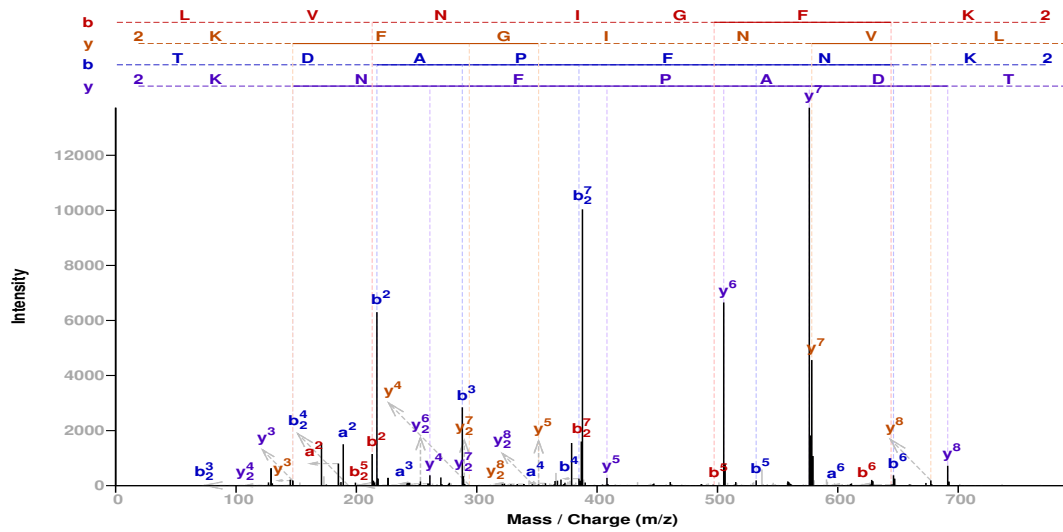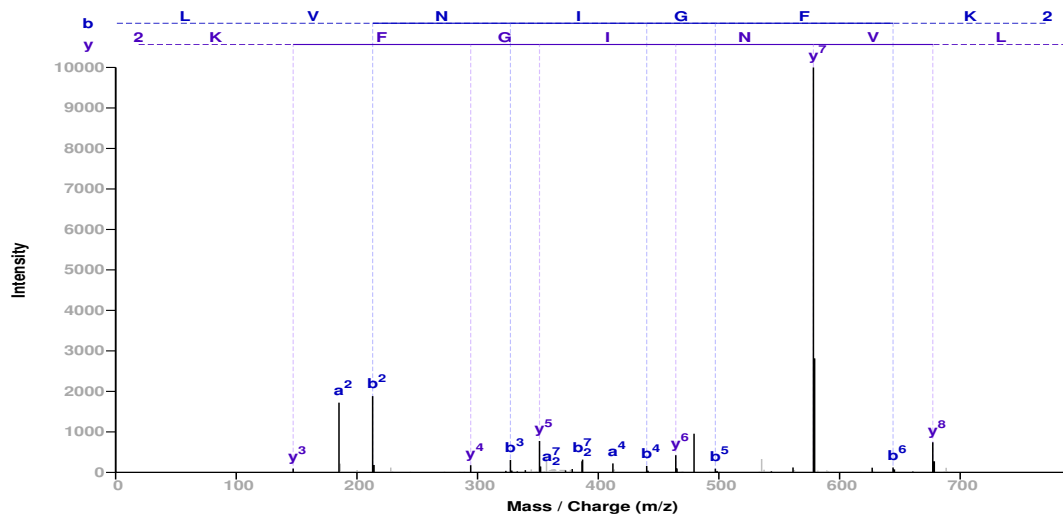

yeast01\_Scan\_Number\_1790 Precursor m/z: 458.750 cosine: 0.860  $\alpha$ : 0.246

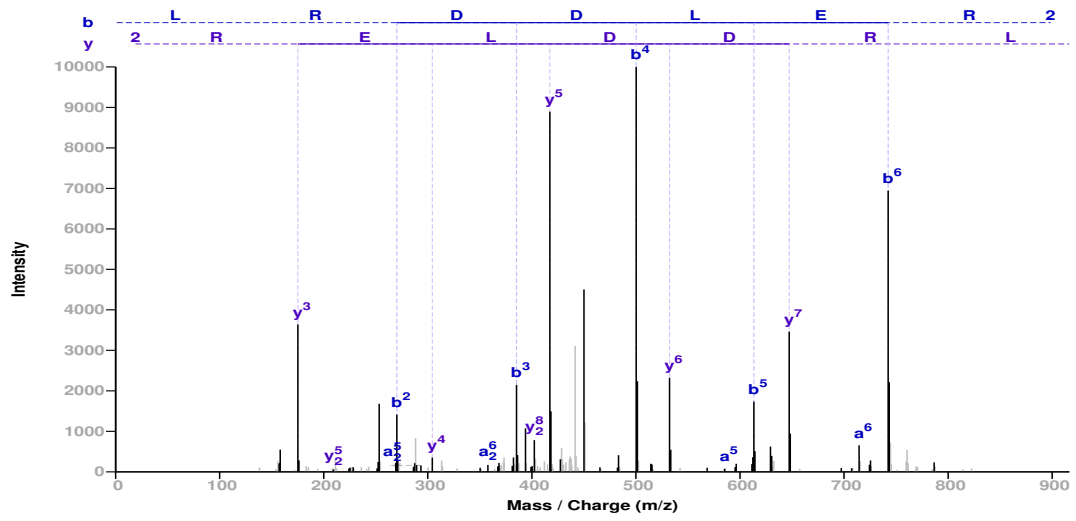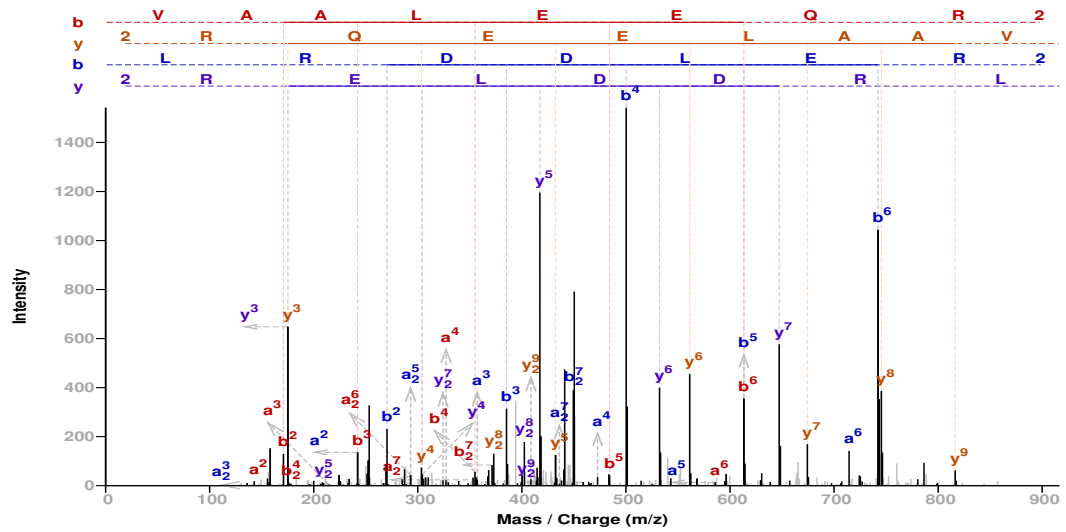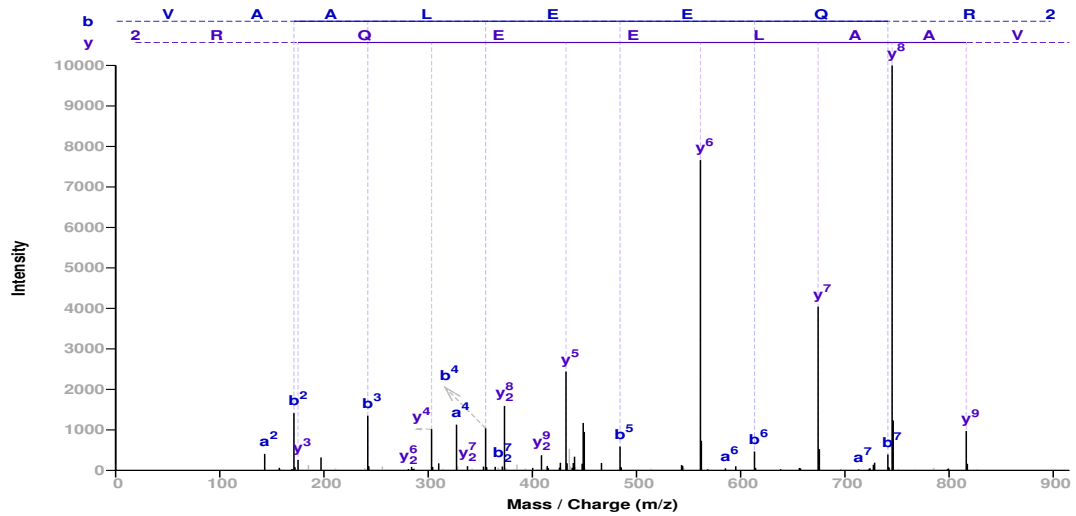

yeast01\_Scan\_Number\_4327 Precursor m/z: 612.808 cosine: 0.752  $\alpha$ : 0.243

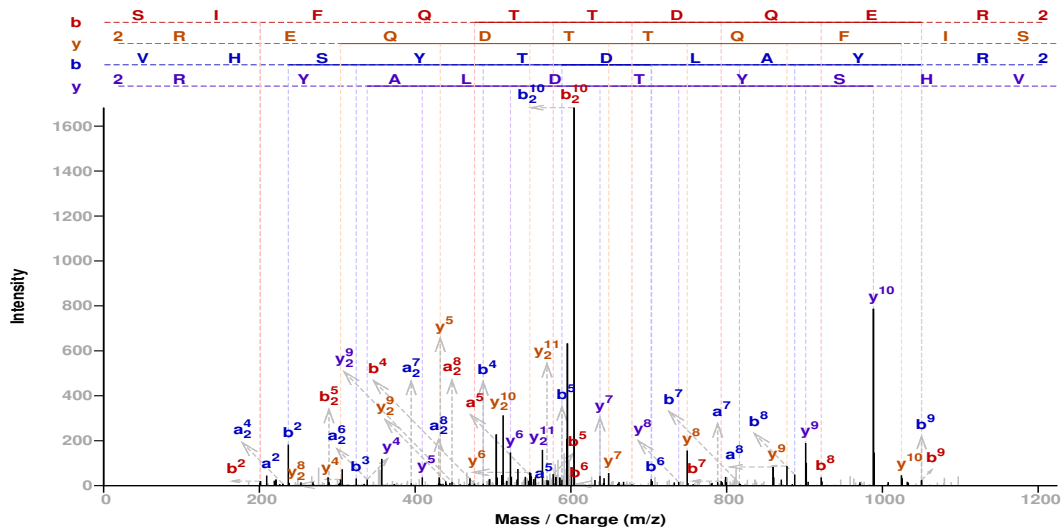

yeast01\_Scan\_Number\_1000 Precursor m/z: 423.197 cosine: 0.847  $\alpha$ : 0.238

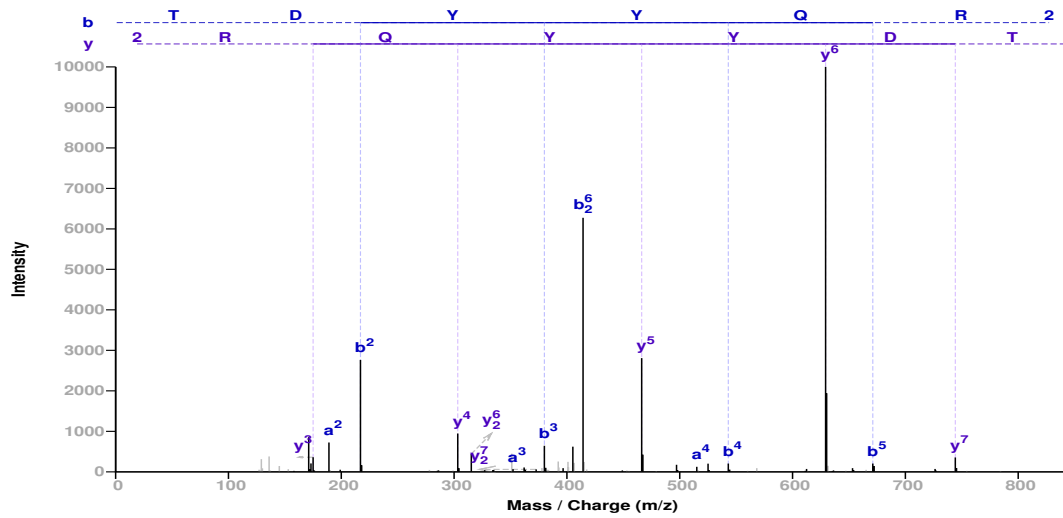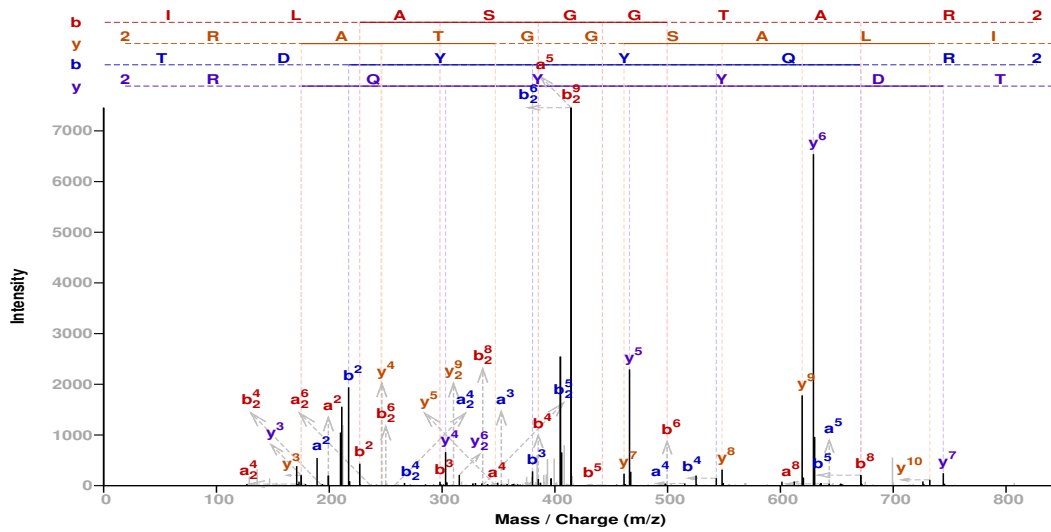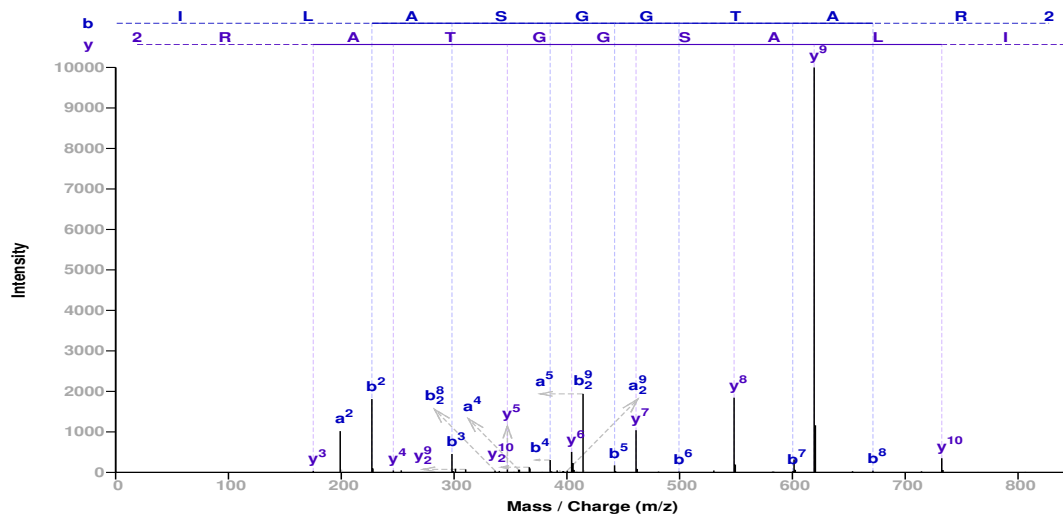



yeast01\_Scan\_Number\_5209 Precursor m/z: 355.201 cosine: 0.793  $\alpha$ : 0.237

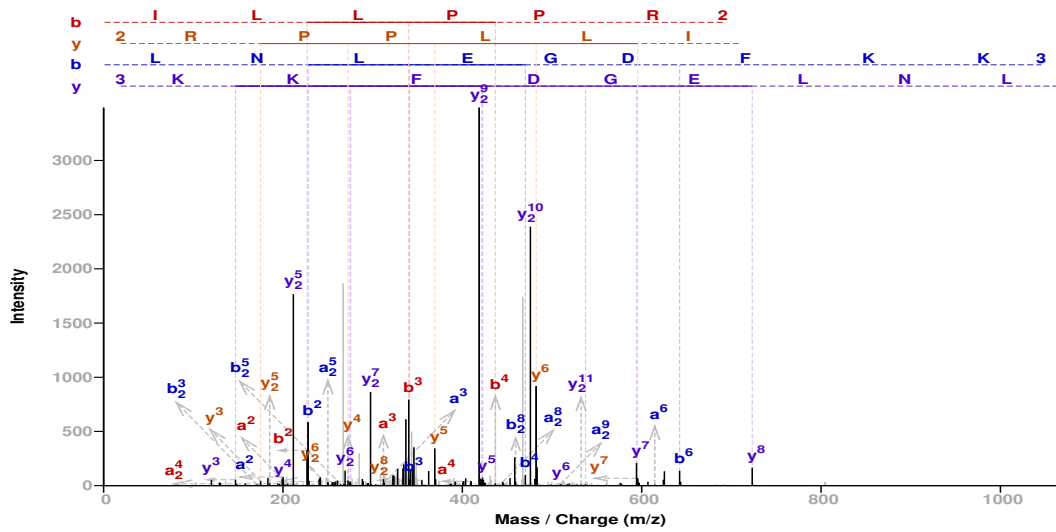

yeast01\_Scan\_Number\_9295 Precursor m/z: 822.453 cosine: 0.789  $\alpha$ : 0.235

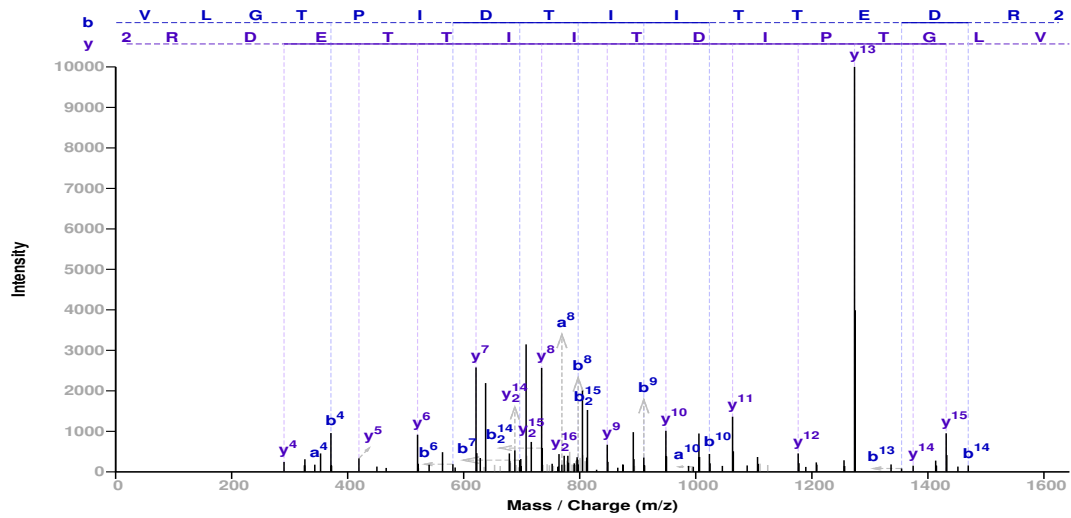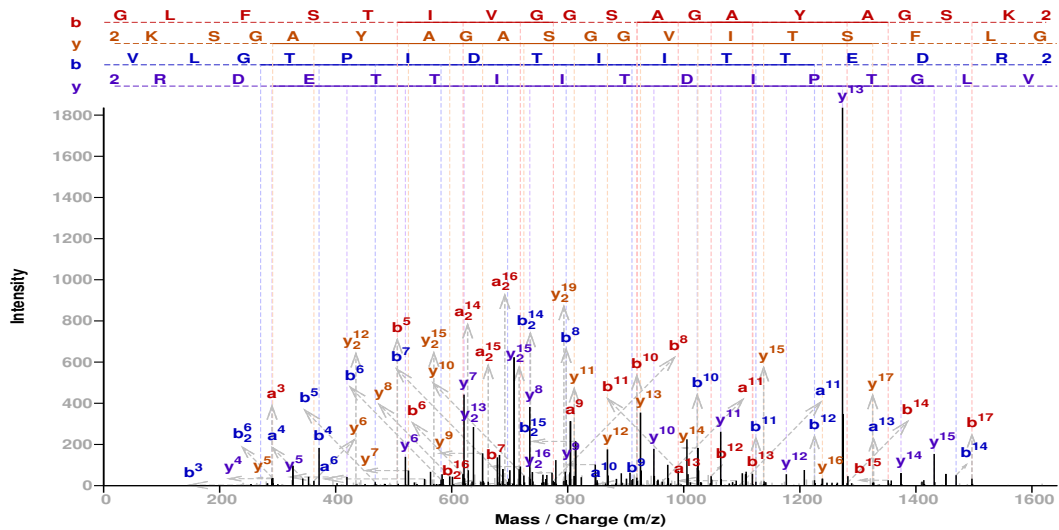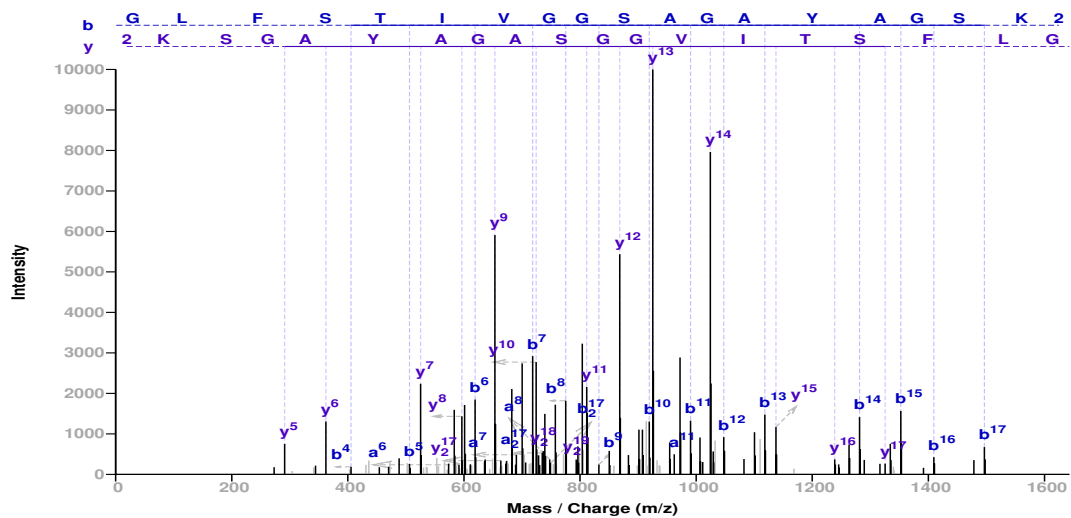

yeast01\_Scan\_Number\_6188 Precursor m/z: 468.595 cosine: 0.796  $\alpha$ : 0.233

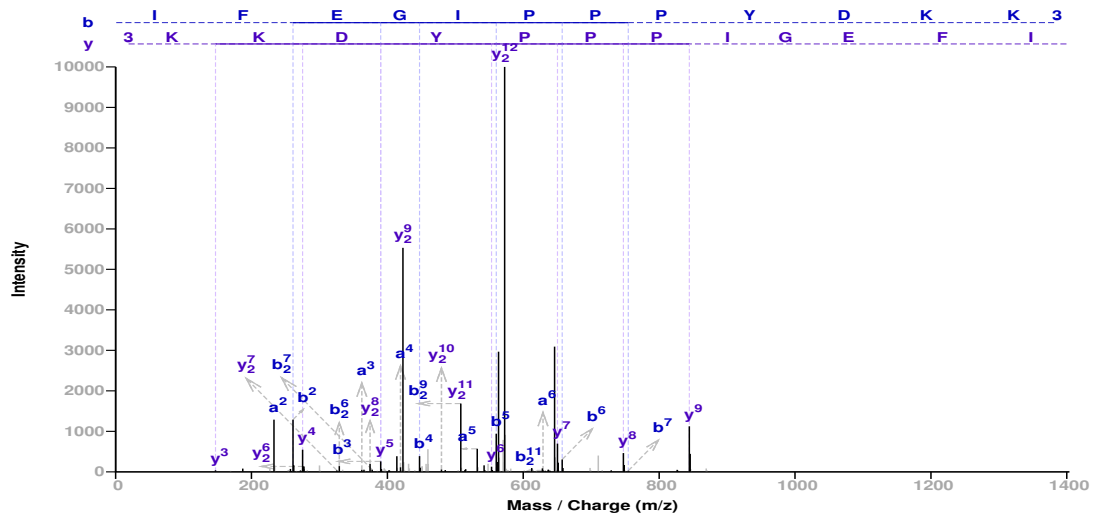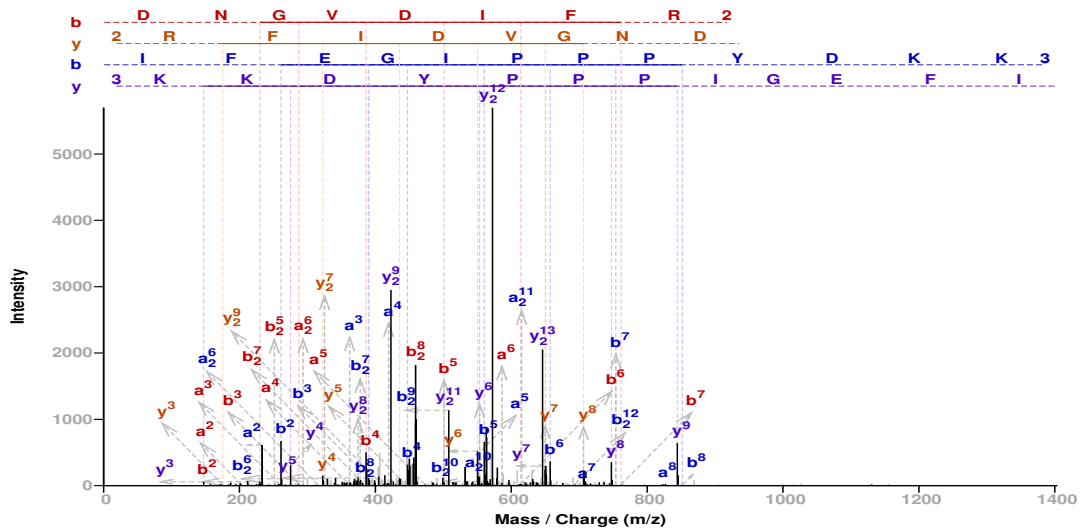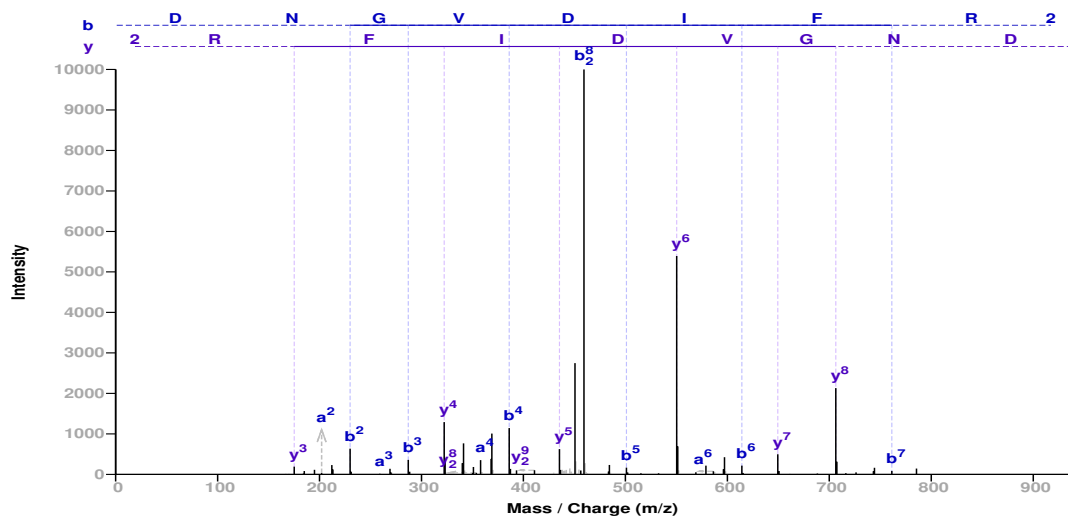

yeast01\_Scan\_Number\_6421 Precursor m/z: 413.271 cosine: 0.769  $\alpha$ : 0.232

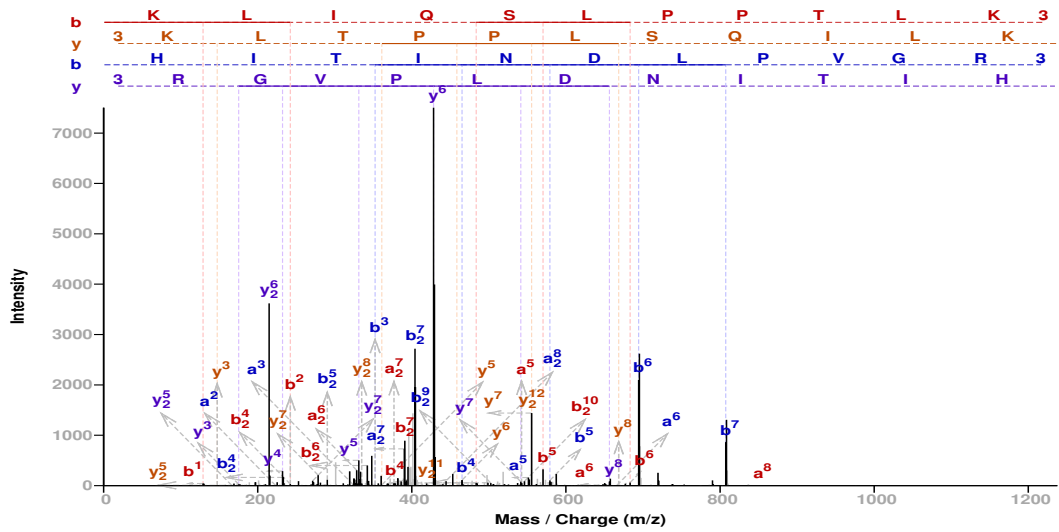

yeast01\_Scan\_Number\_6349 Precursor m/z: 412.239 cosine: 0.882  $\alpha$ : 0.228

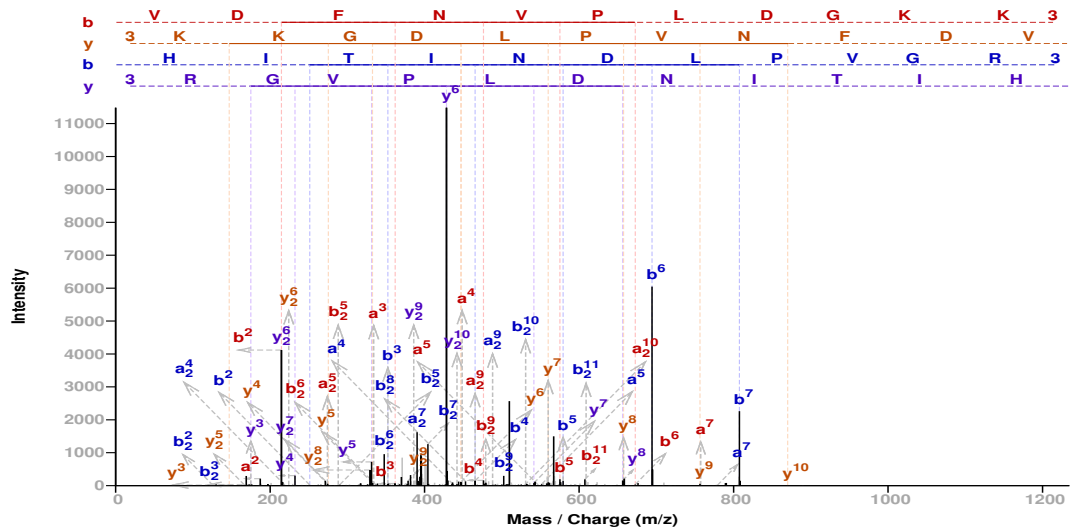

yeast01\_Scan\_Number\_7177 Precursor m/z: 500.811 cosine: 0.840  $\alpha$ : 0.224

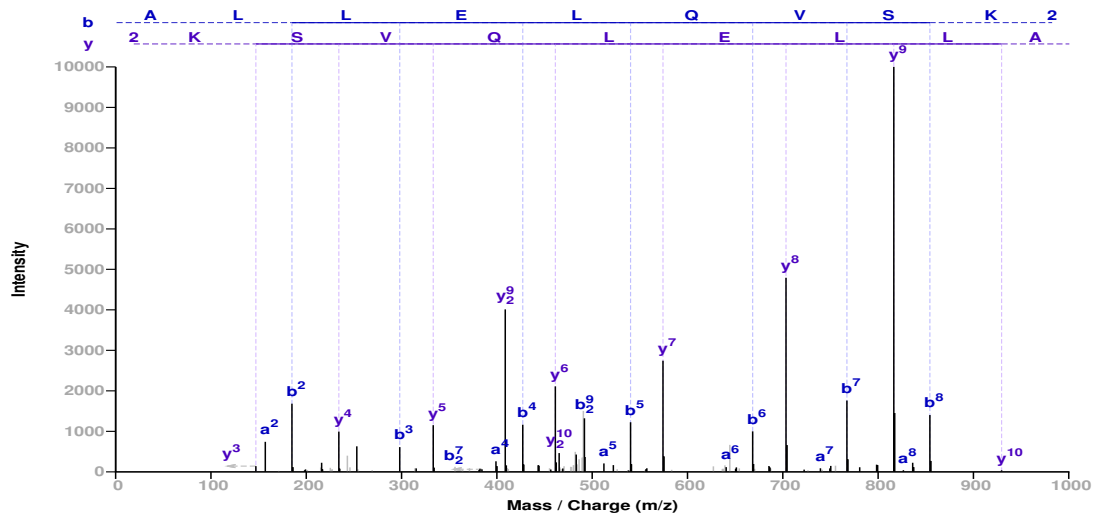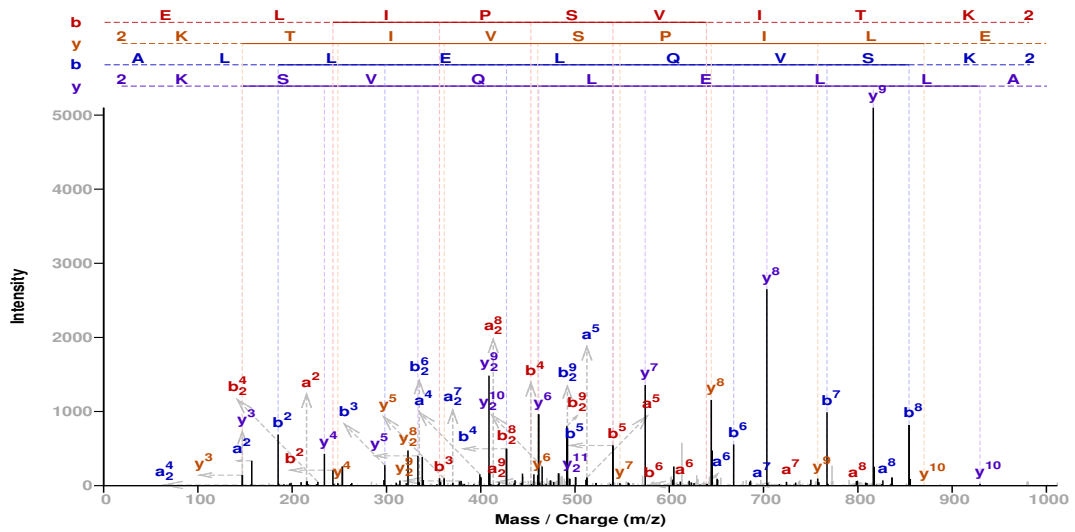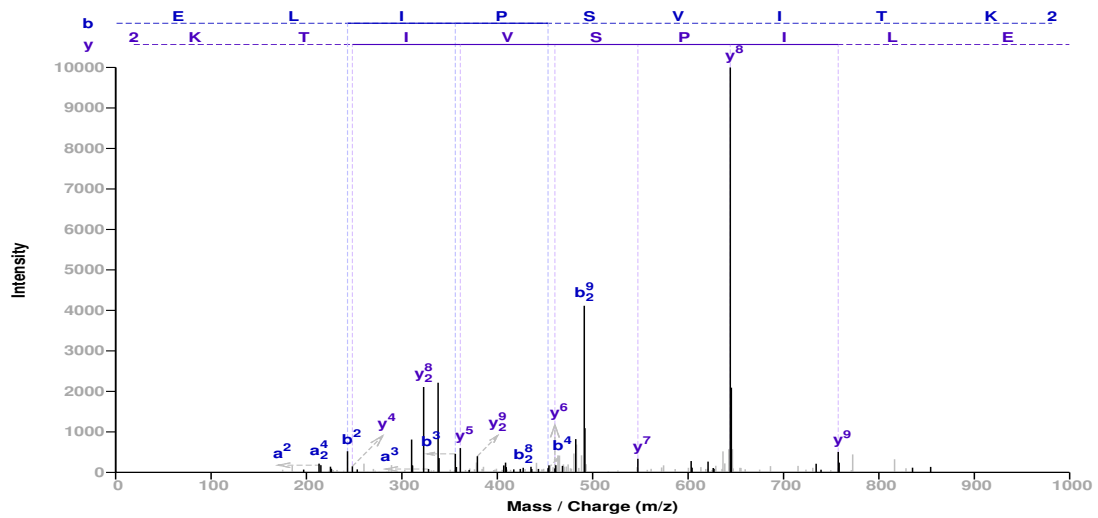

yeast01\_Scan\_Number\_6060 Precursor m/z: 628.336 cosine: 0.789  $\alpha$ : 0.220

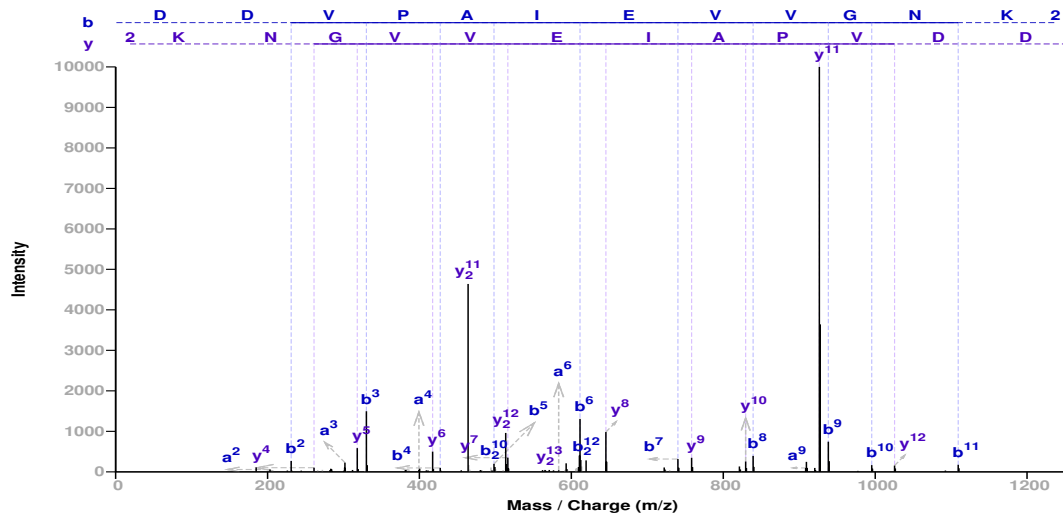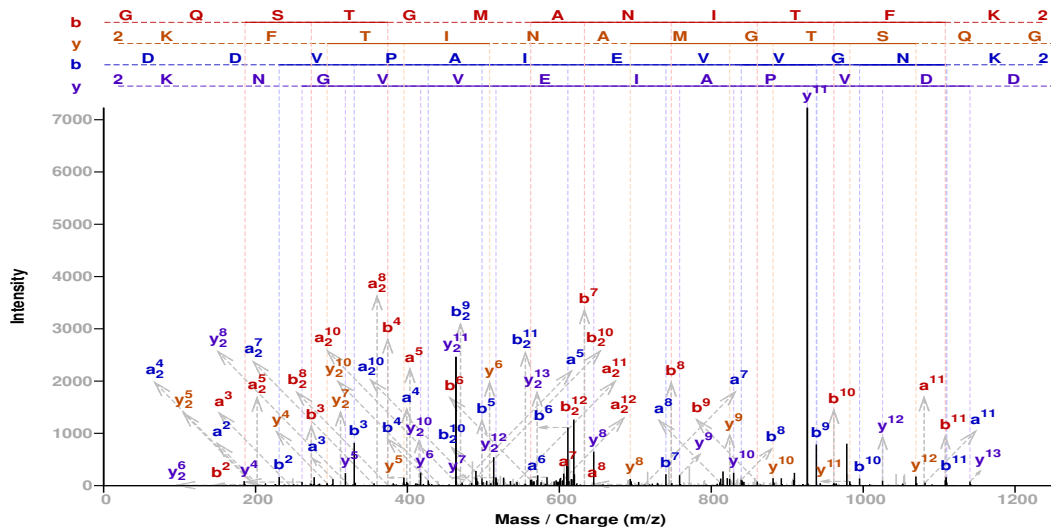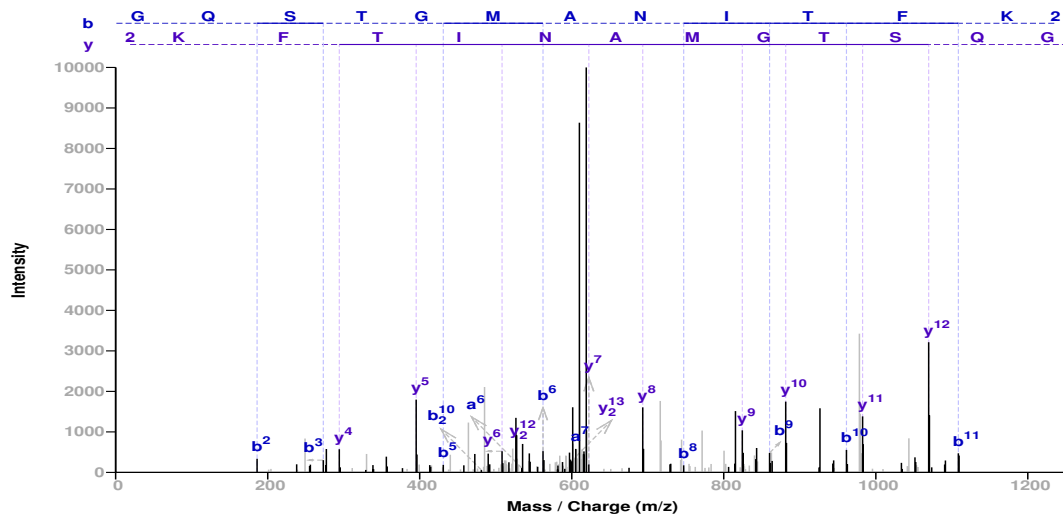

yeast01\_Scan\_Number\_3271 Precursor m/z: 354.703 cosine: 0.930  $\alpha$ : 0.220

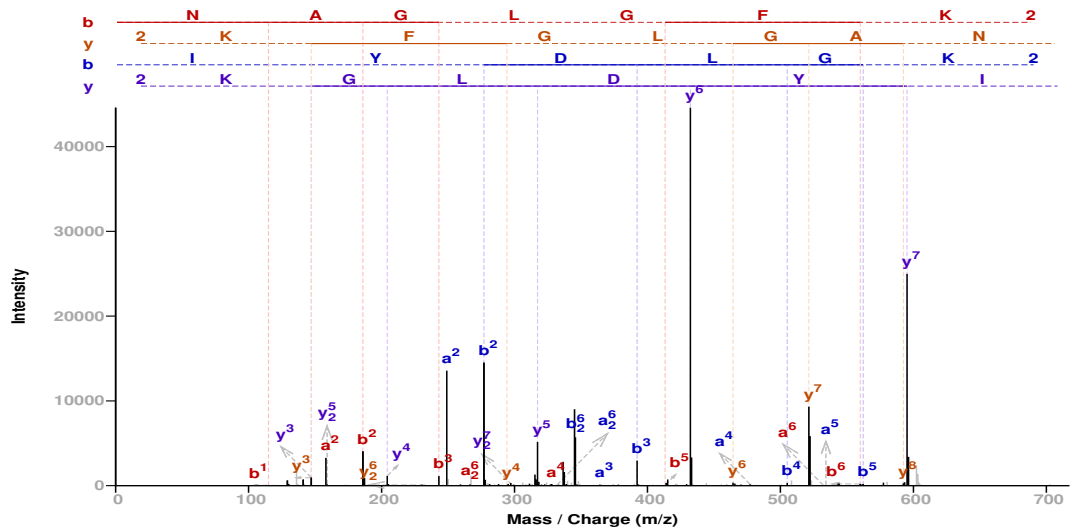



yeast01\_Scan\_Number\_1948 Precursor m/z: 555.818 cosine: 0.778  $\alpha$ : 0.218

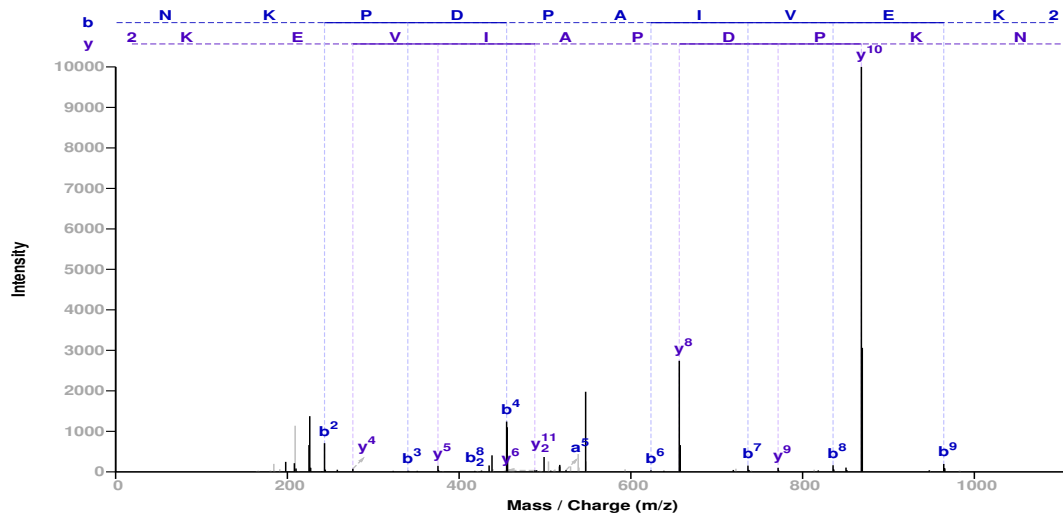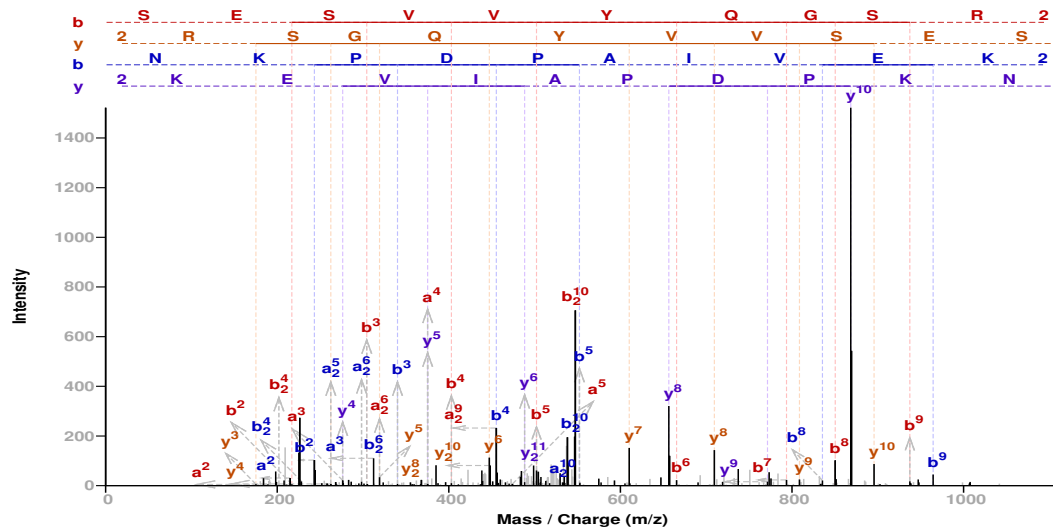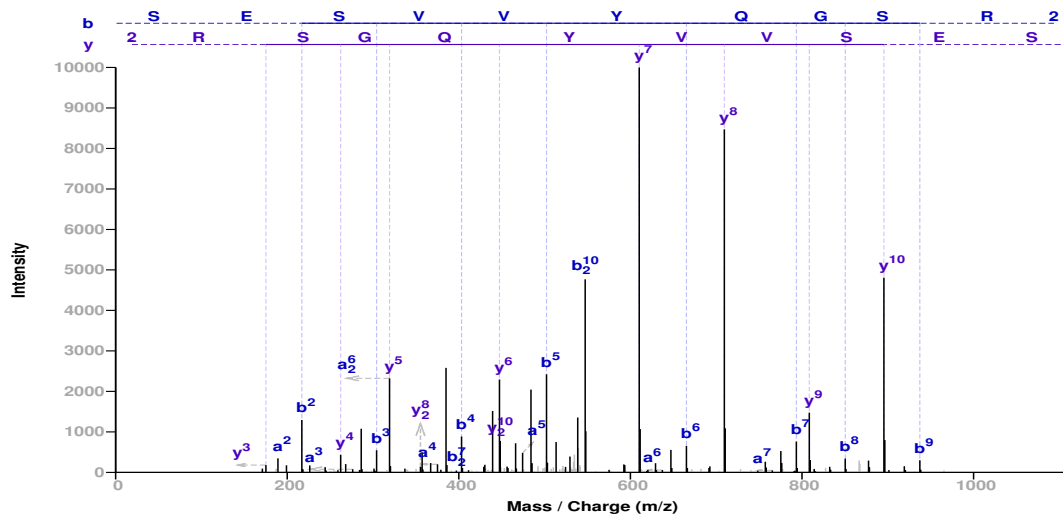

yeast01\_Scan\_Number\_3815 Precursor m/z: 511.919 cosine: 0.805  $\alpha$ : 0.214

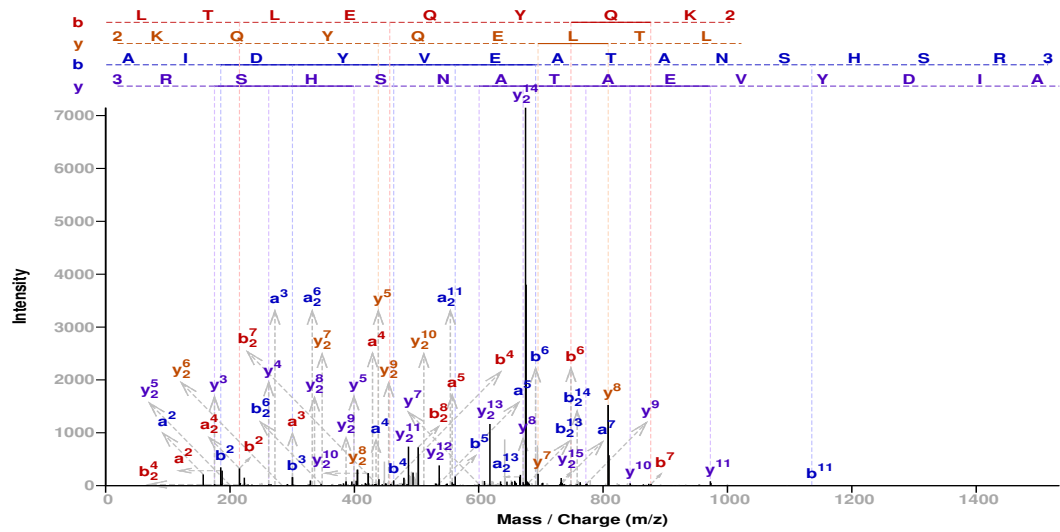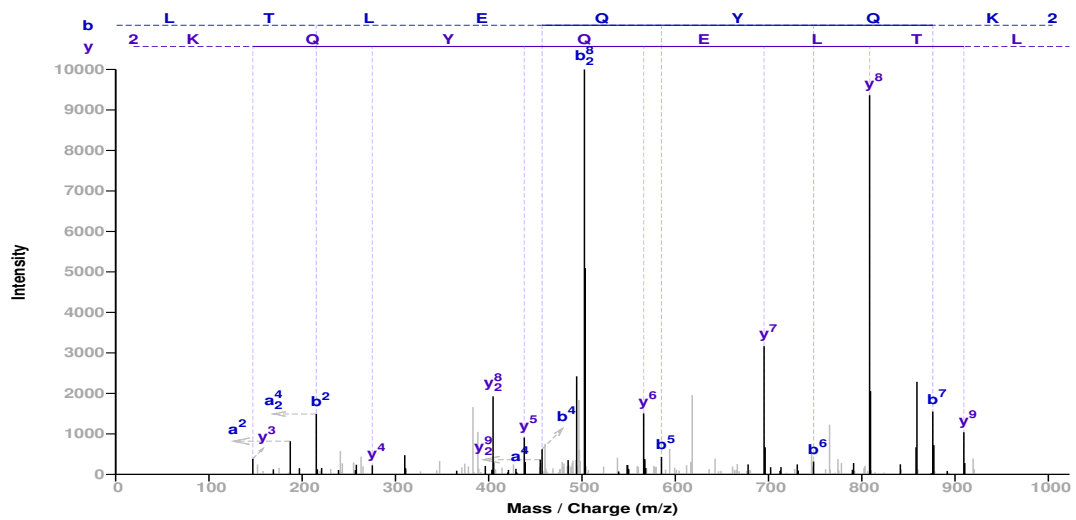

yeast01\_Scan\_Number\_4739 Precursor m/z: 447.755 cosine: 0.835  $\alpha$ : 0.212

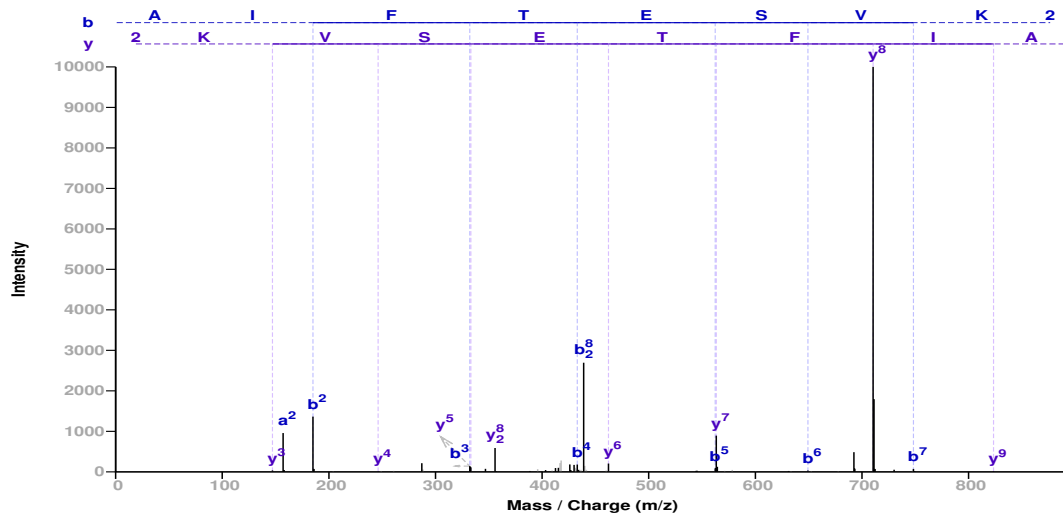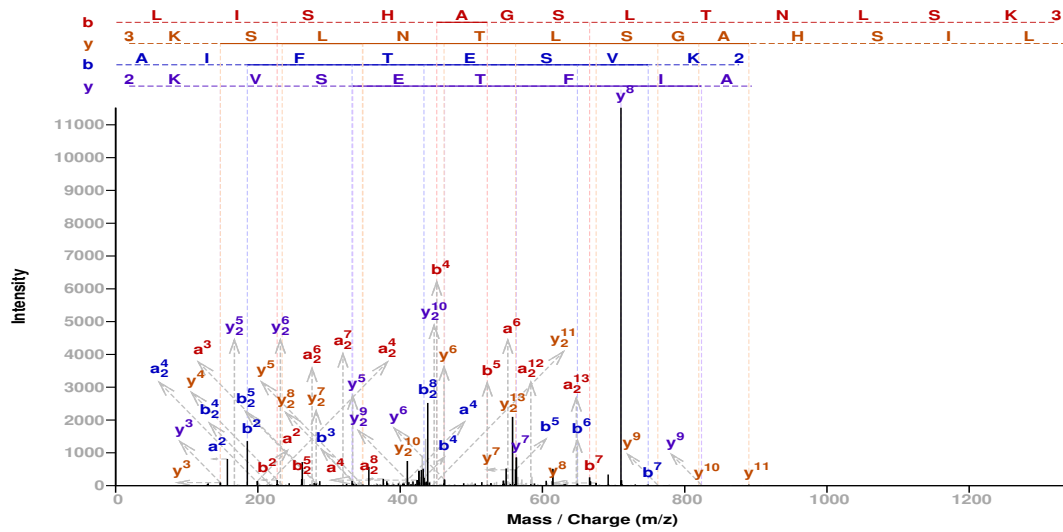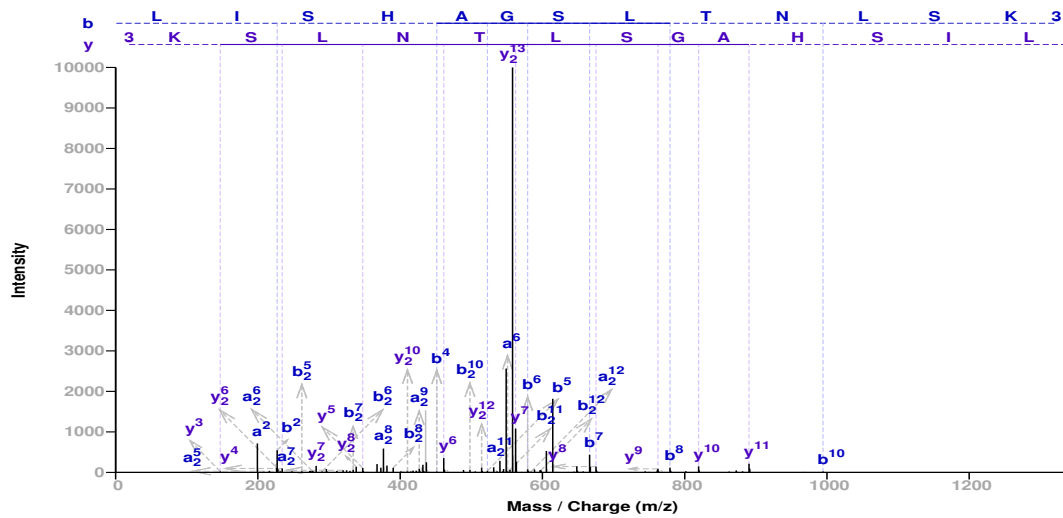

yeast01\_Scan\_Number\_7650 Precursor m/z: 652.860 cosine: 0.788  $\alpha$ : 0.210

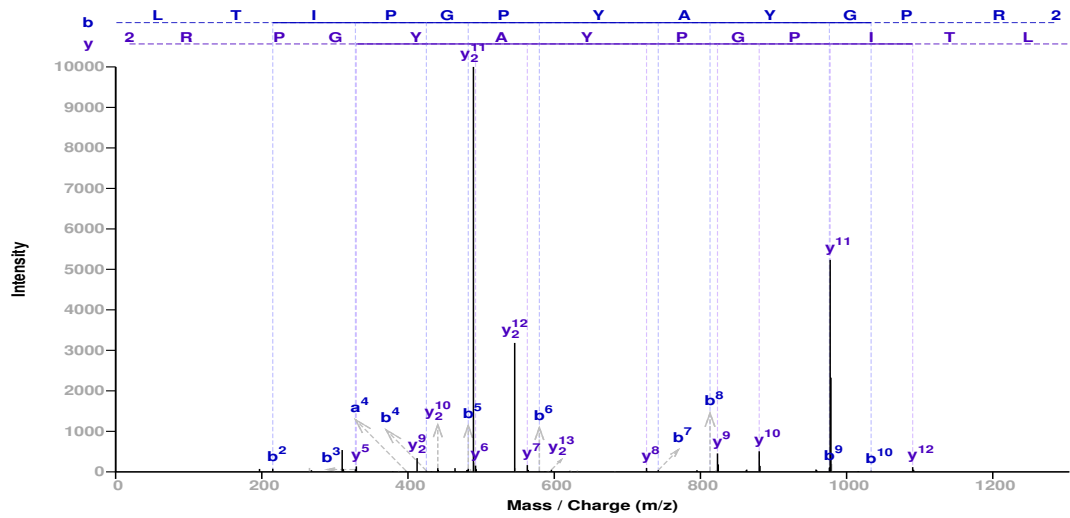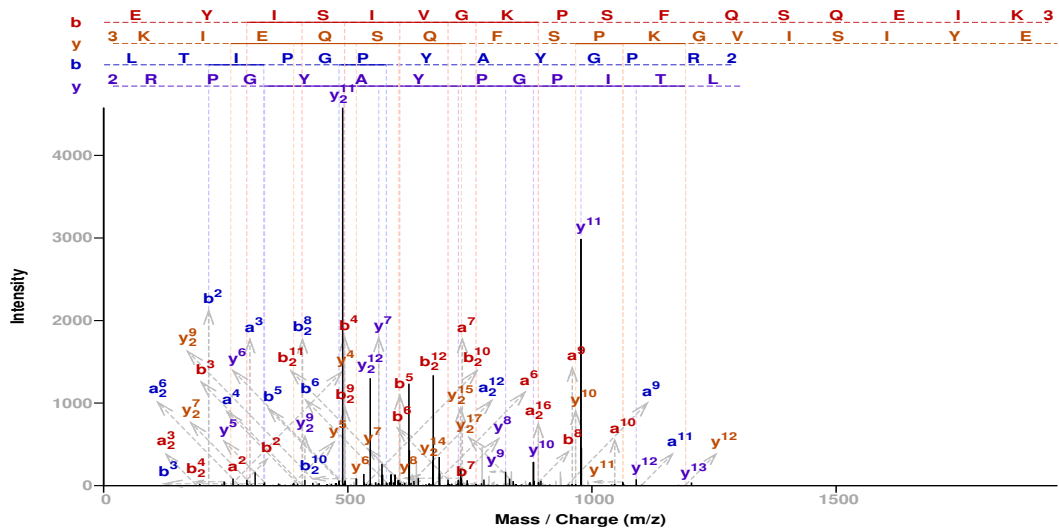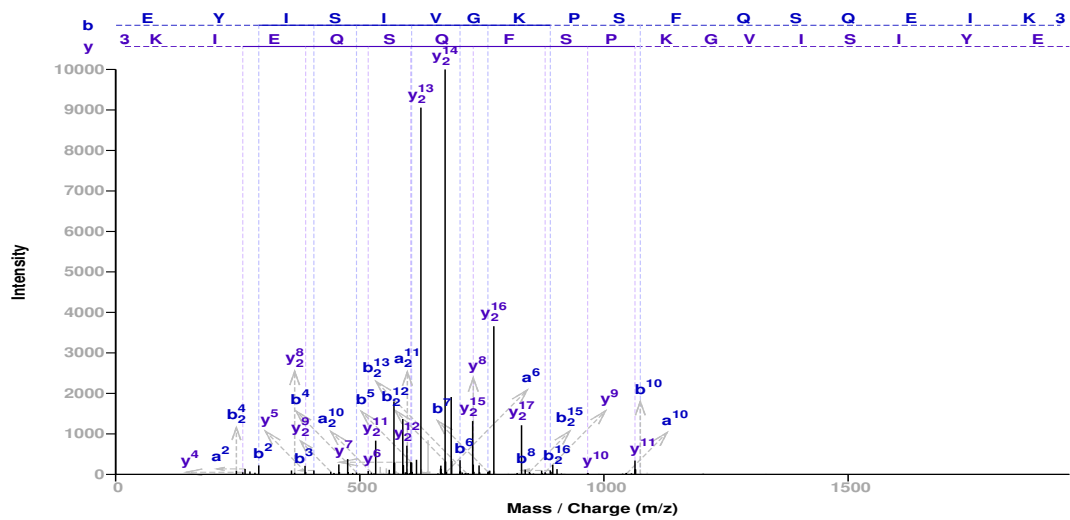

yeast01\_Scan\_Number\_2938 Precursor m/z: 418.733 cosine: 0.780  $\alpha$ : 0.209

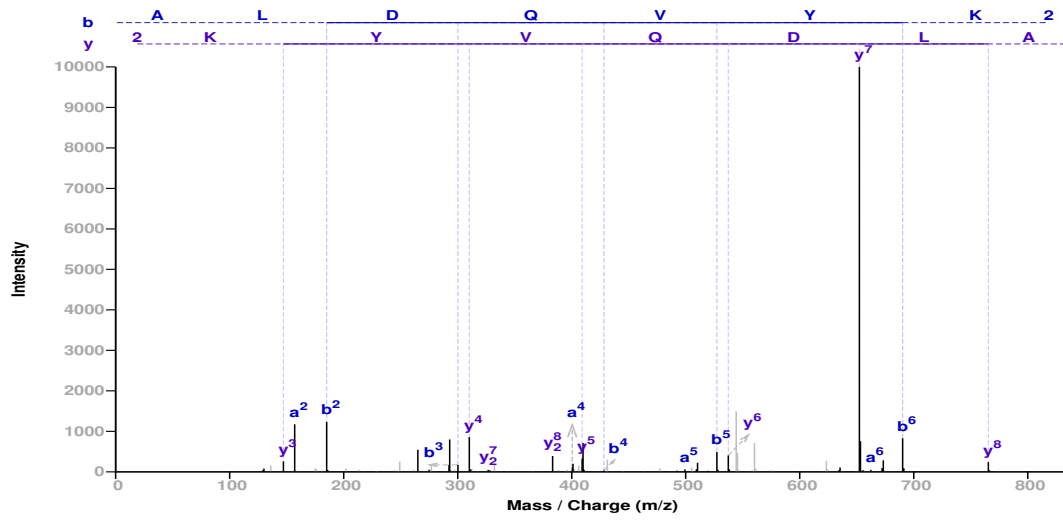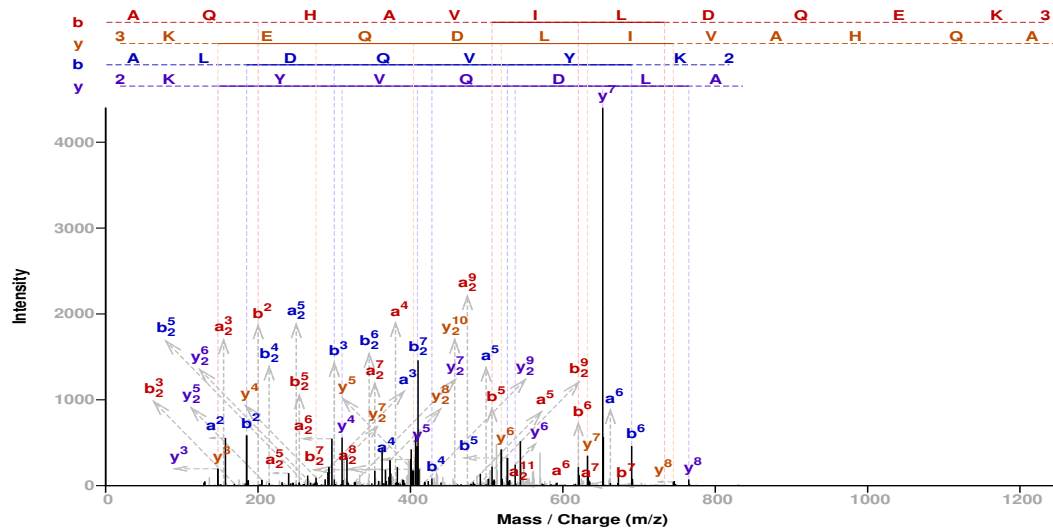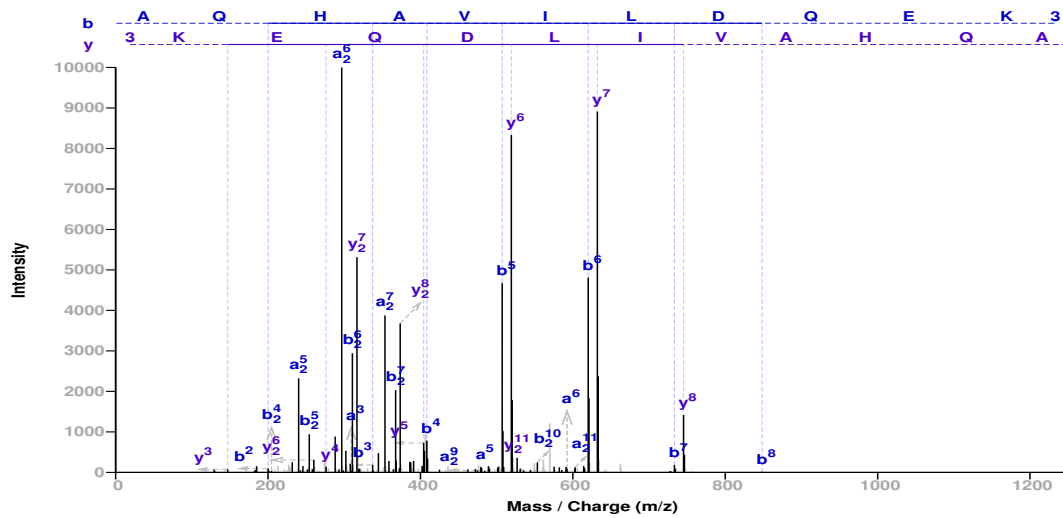

yeast01\_Scan\_Number\_7631 Precursor m/z: 676.870 cosine: 0.791  $\alpha$ : 0.207

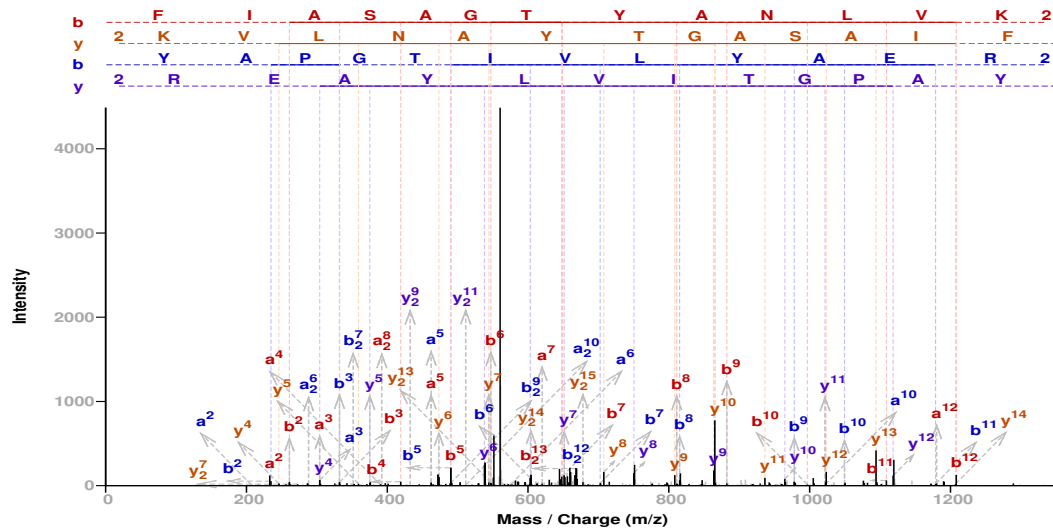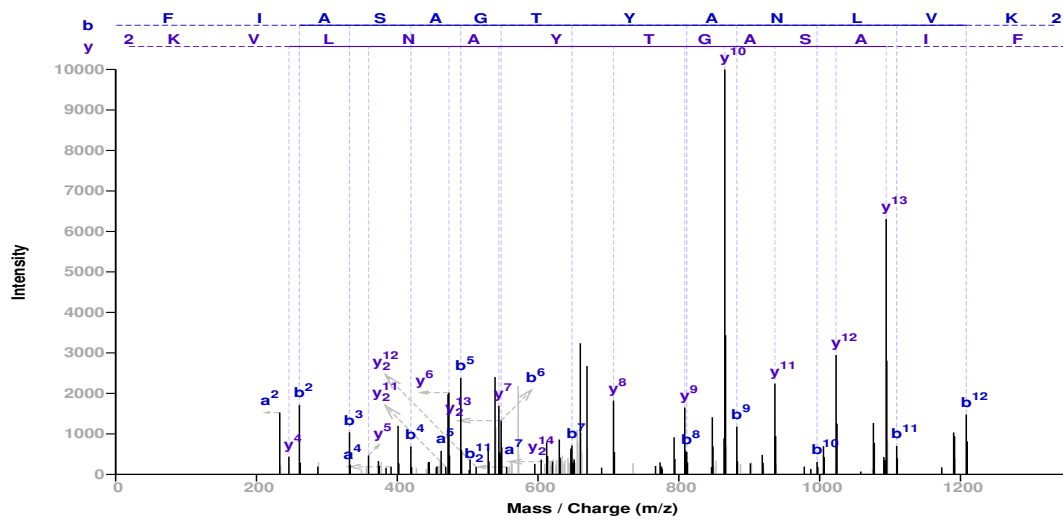

yeast01\_Scan\_Number\_3360 Precursor m/z: 457.235 cosine: 0.764  $\alpha$ : 0.207

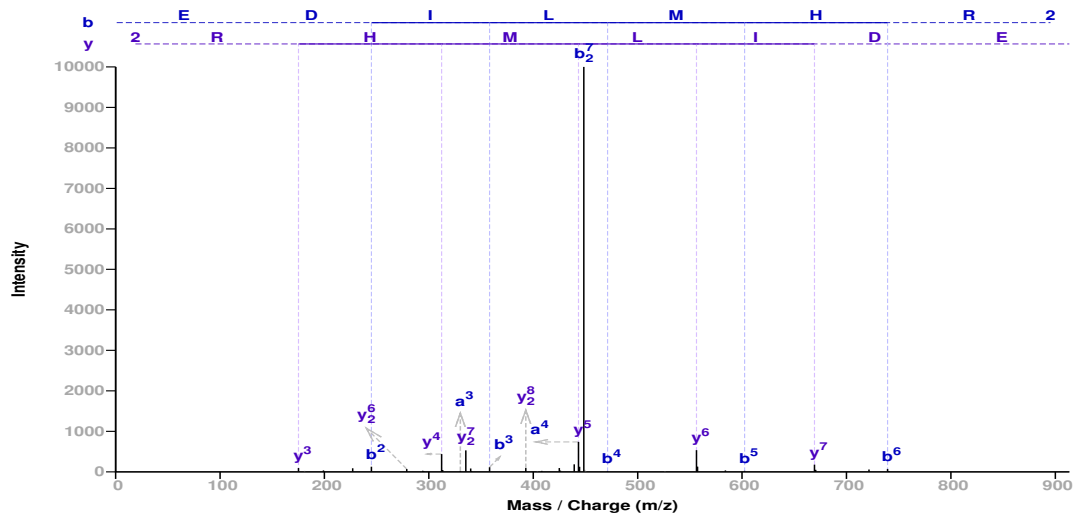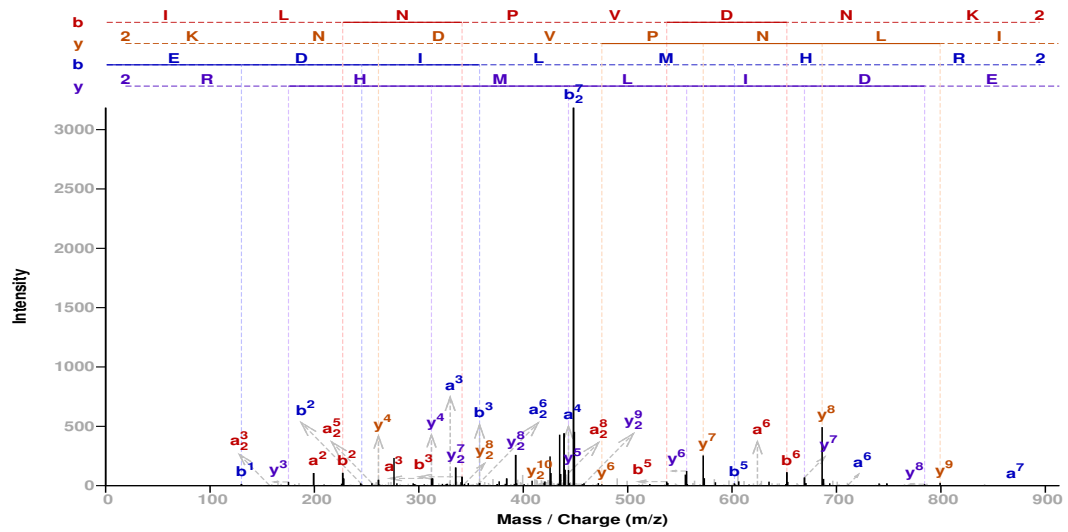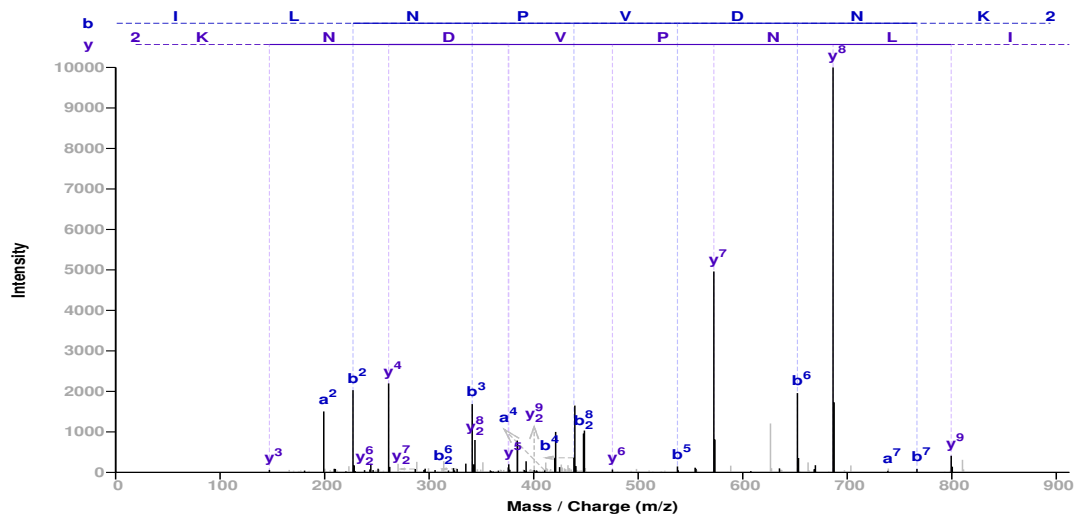

yeast01\_Scan\_Number\_1102 Precursor m/z: 400.883 cosine: 0.794  $\alpha$ : 0.206

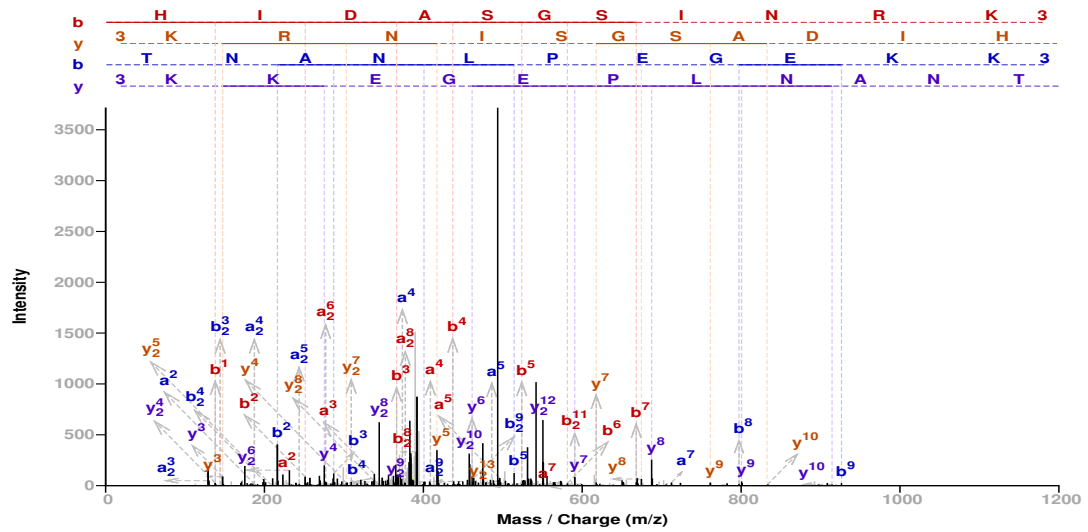



yeast01\_Scan\_Number\_9205 Precursor m/z: 639.326 cosine: 0.888  $\alpha$ : 0.205

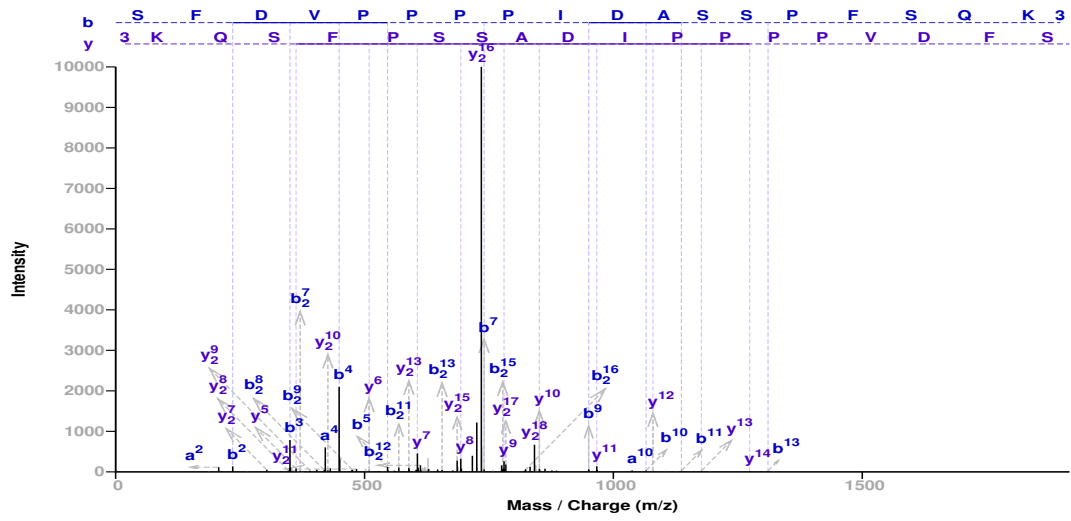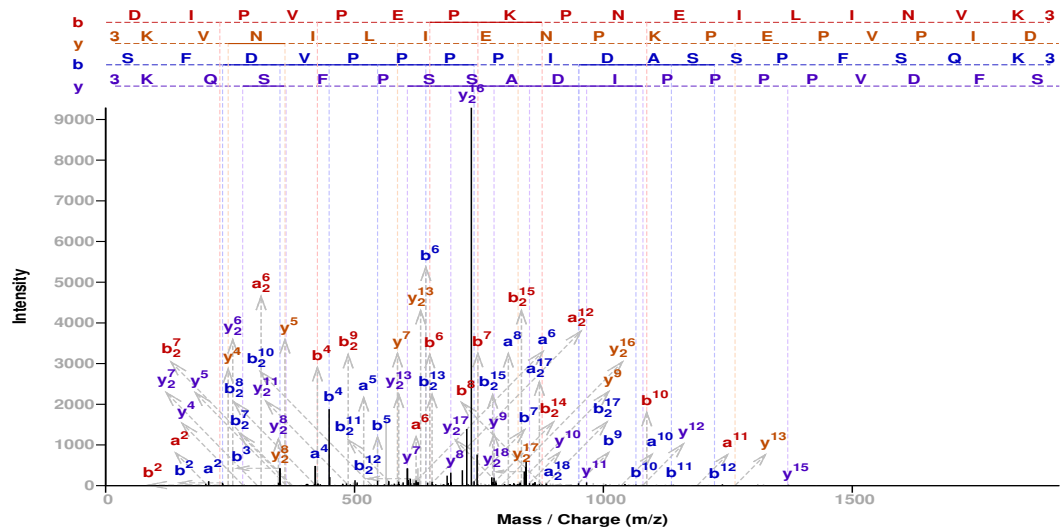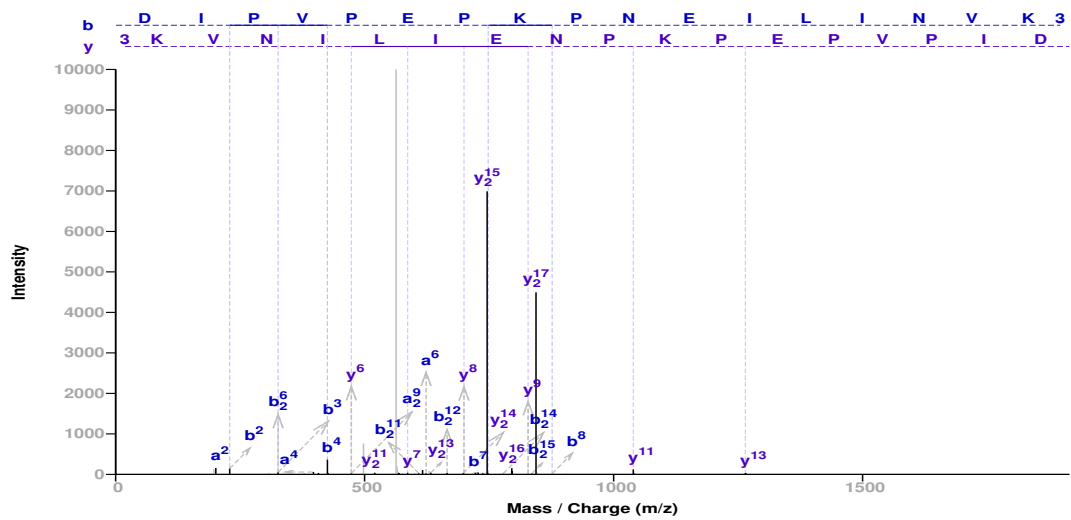

yeast01\_Scan\_Number\_1444 Precursor m/z: 394.716 cosine: 0.894  $\alpha$ : 0.203

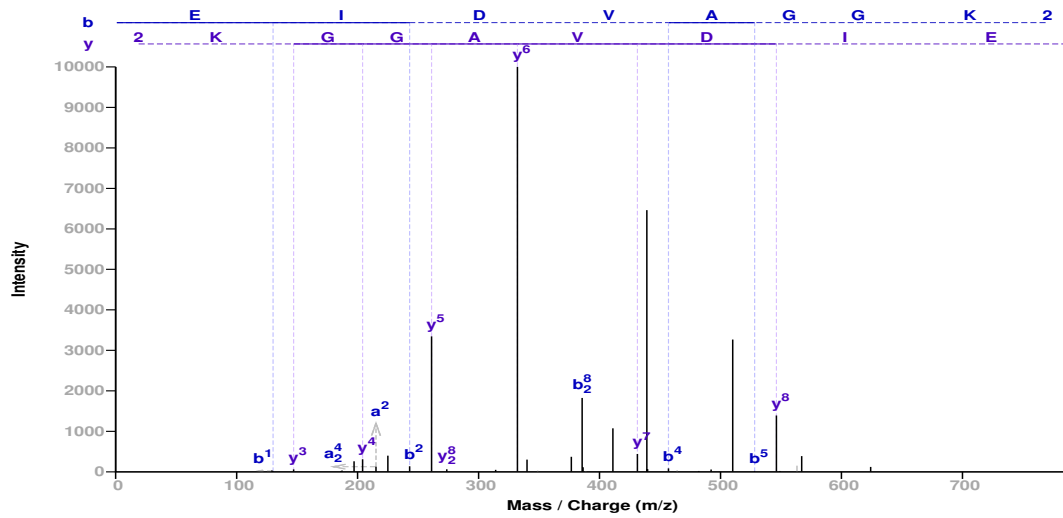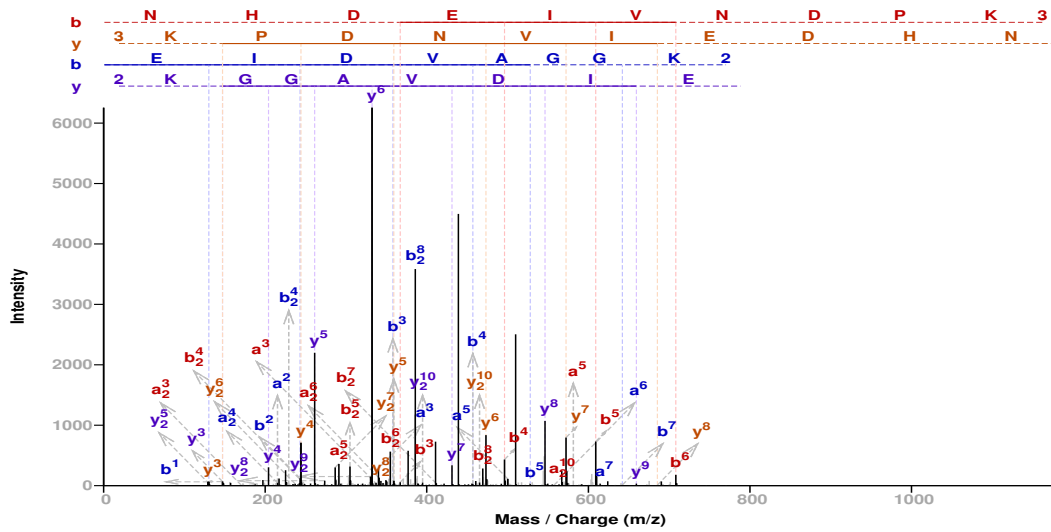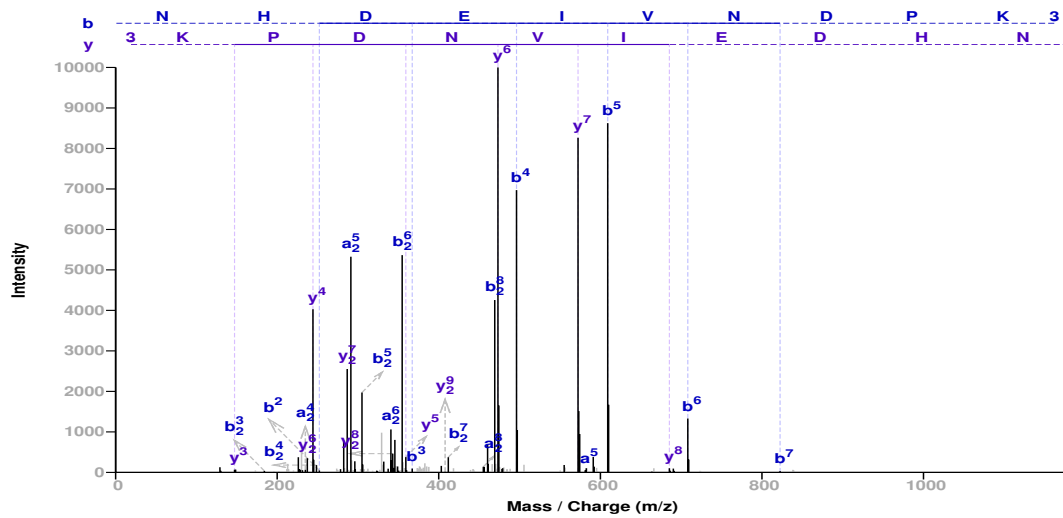



yeast01\_Scan\_Number\_6528 Precursor m/z: 436.586 cosine: 0.848  $\alpha$ : 0.200

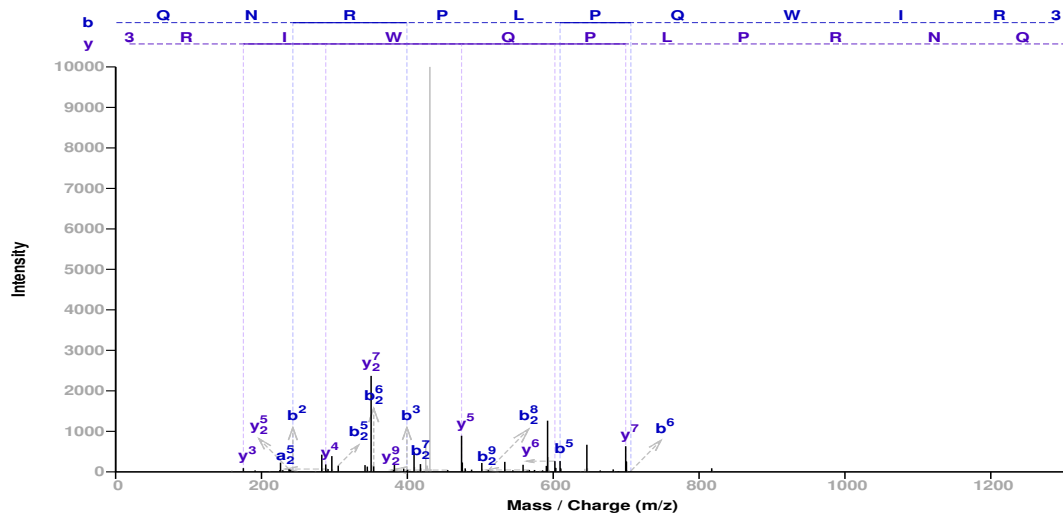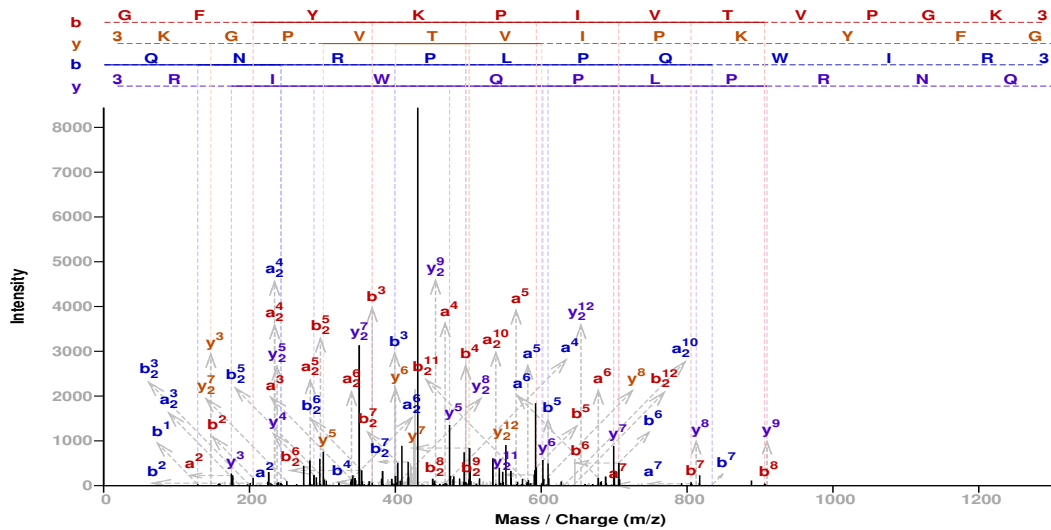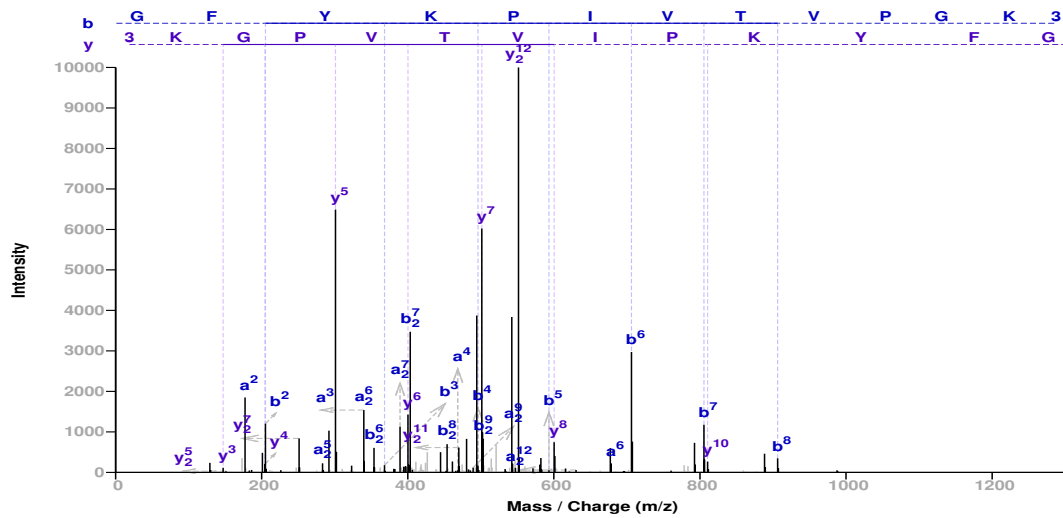

yeast01\_Scan\_Number\_5104 Precursor m/z: 485.289 cosine: 0.793  $\alpha$ : 0.198

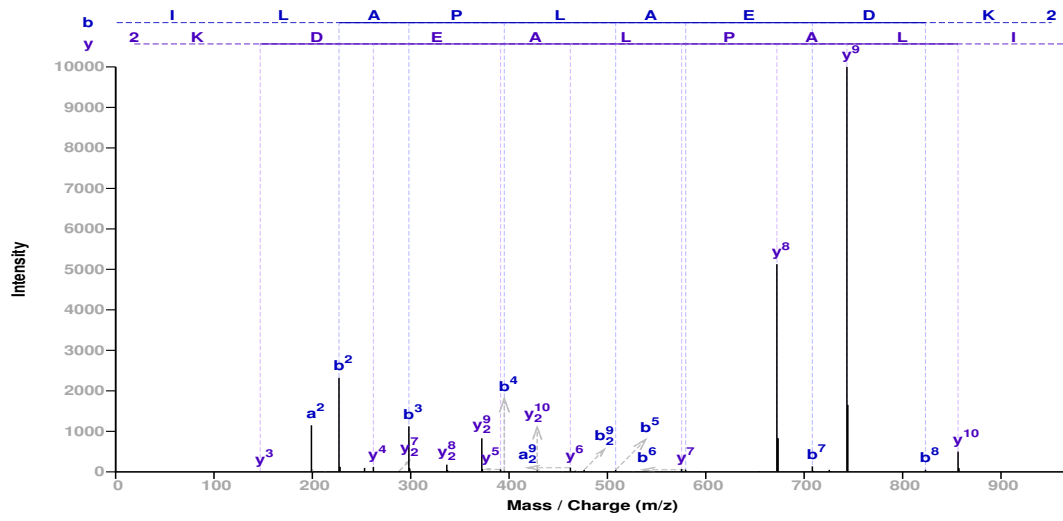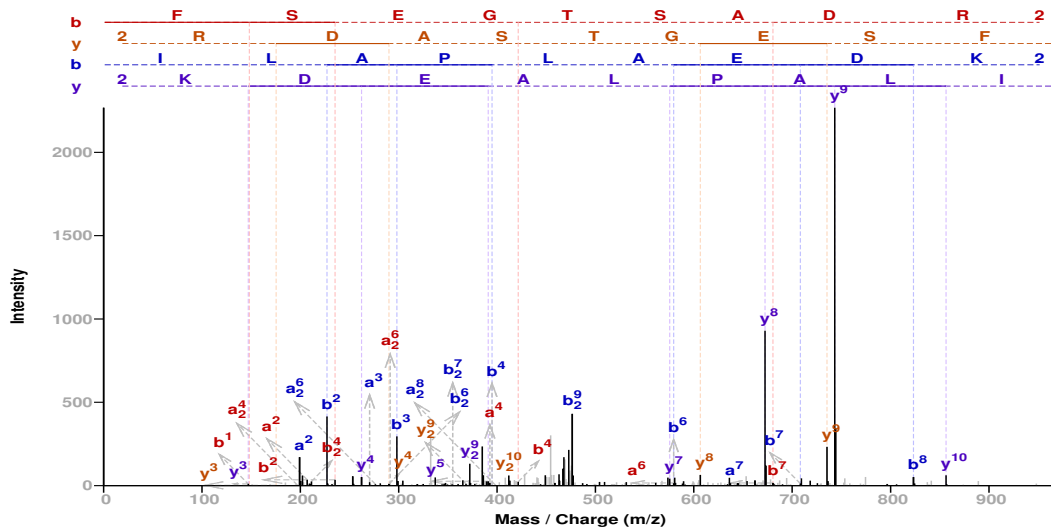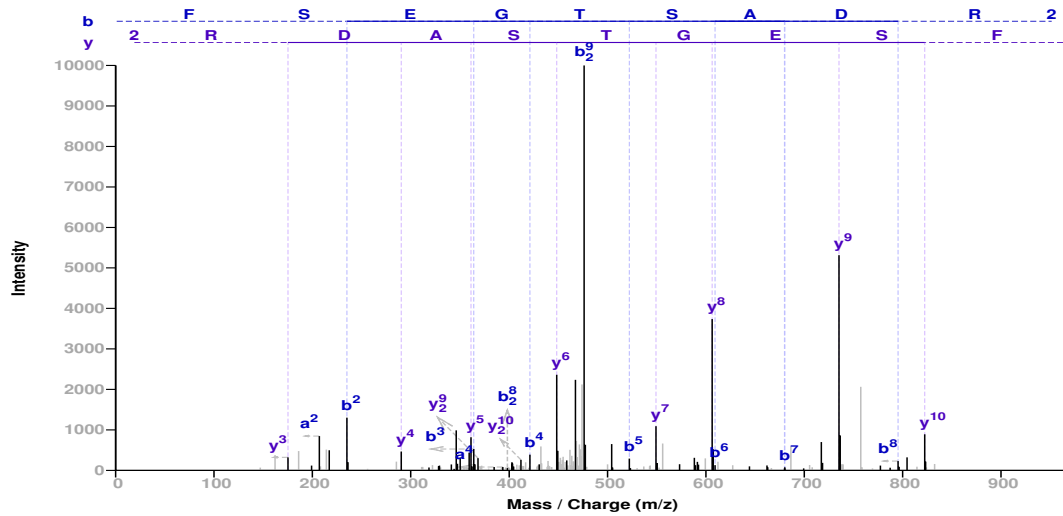

yeast01\_Scan\_Number\_4621 Precursor m/z: 525.292 cosine: 0.803  $\alpha$ : 0.198

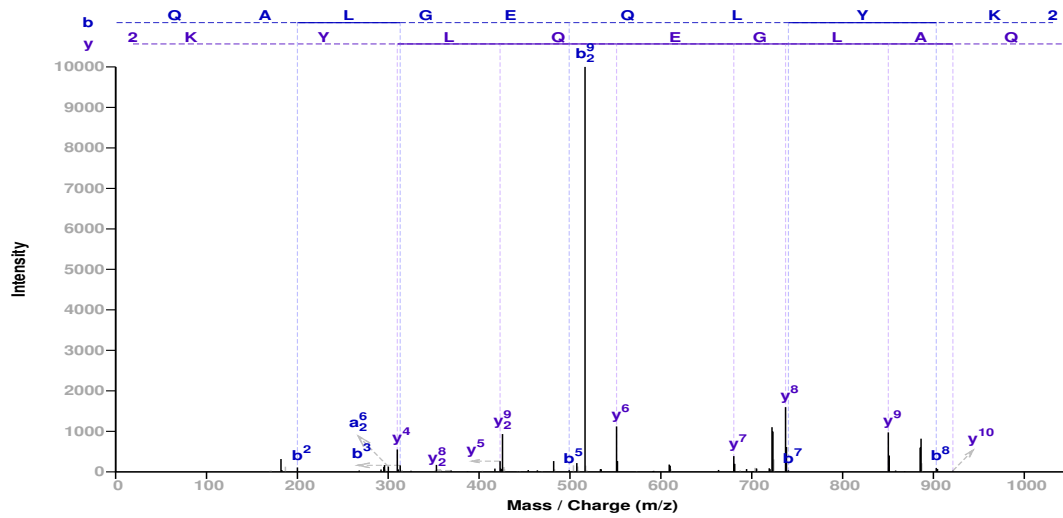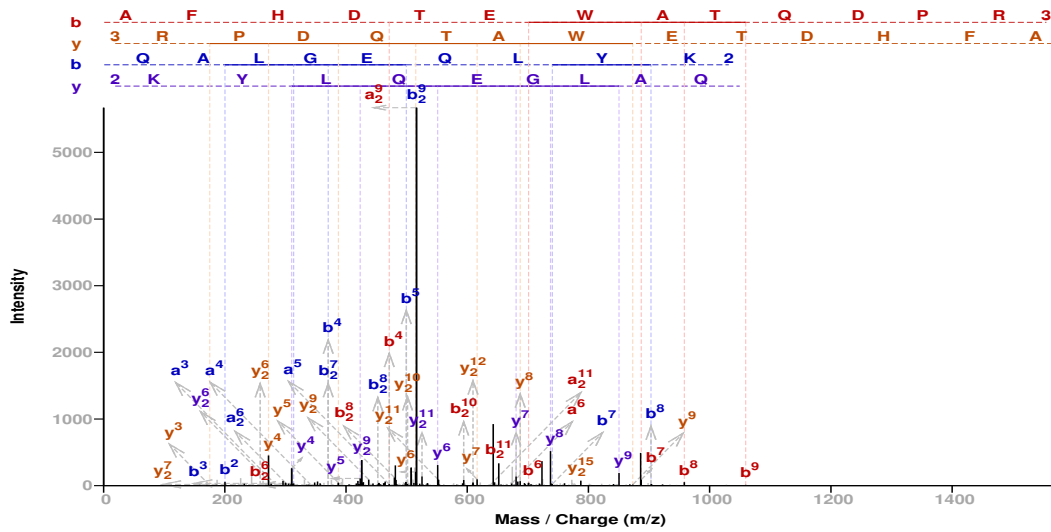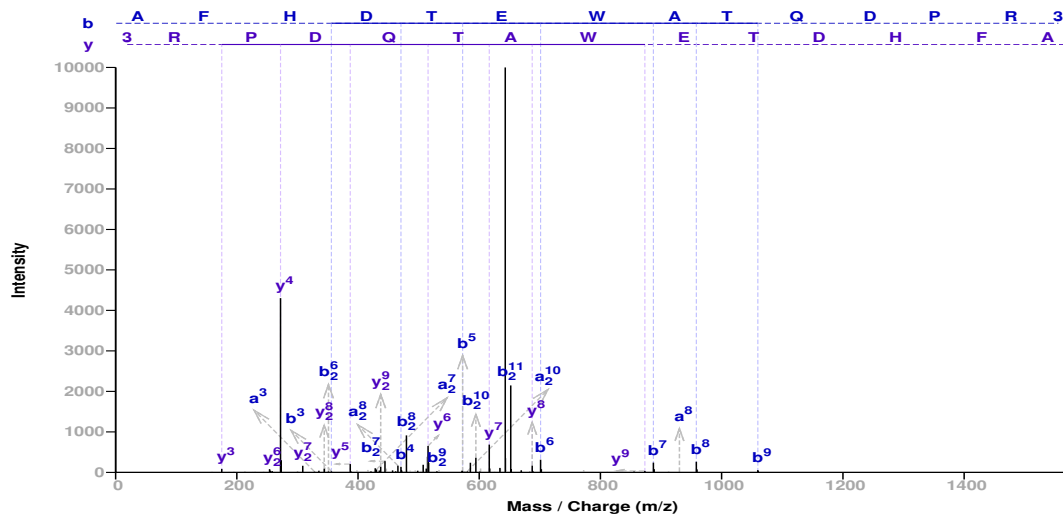

yeast01\_Scan\_Number\_3750 Precursor m/z: 428.222 cosine: 0.795  $\alpha$ : 0.198

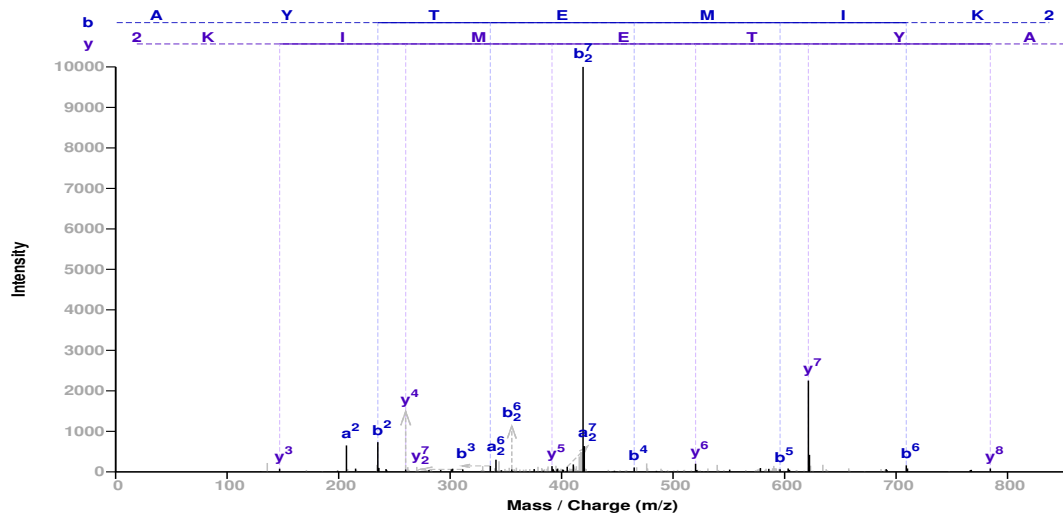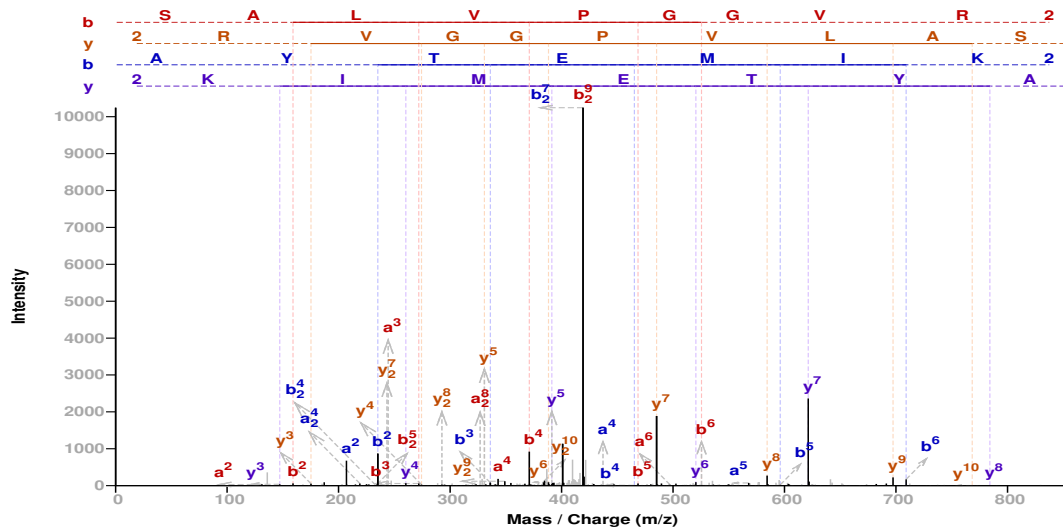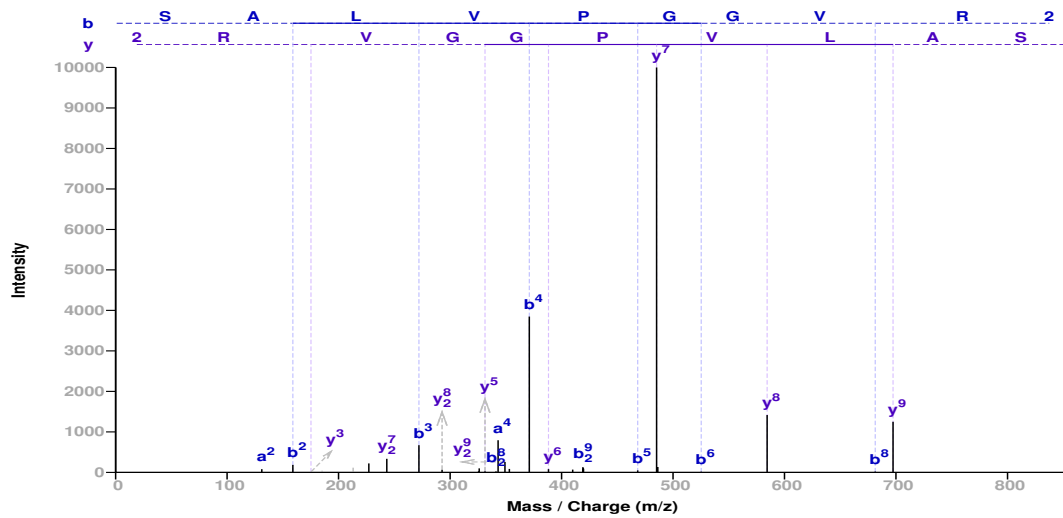

yeast01\_Scan\_Number\_5633 Precursor m/z: 508.808 cosine: 0.834  $\alpha$ : 0.195

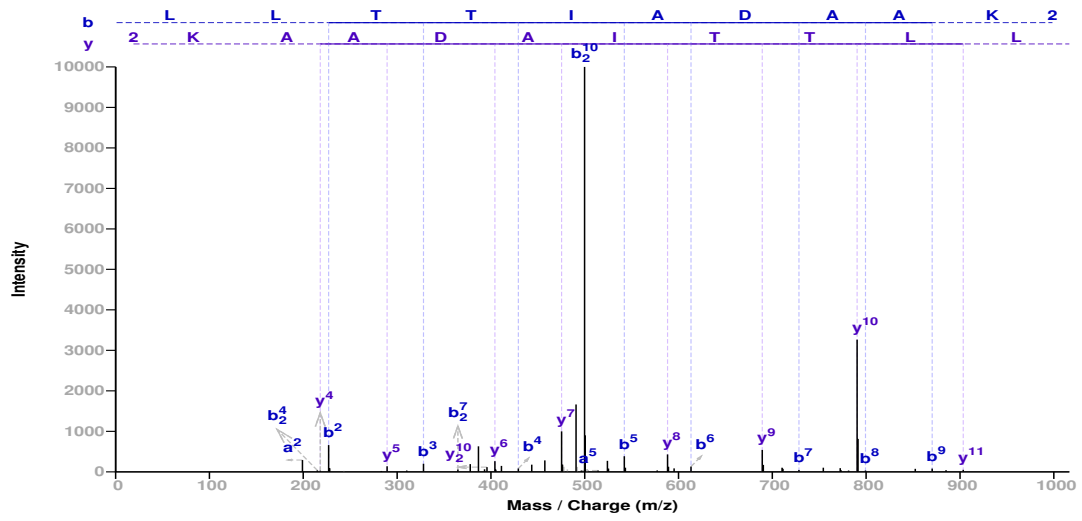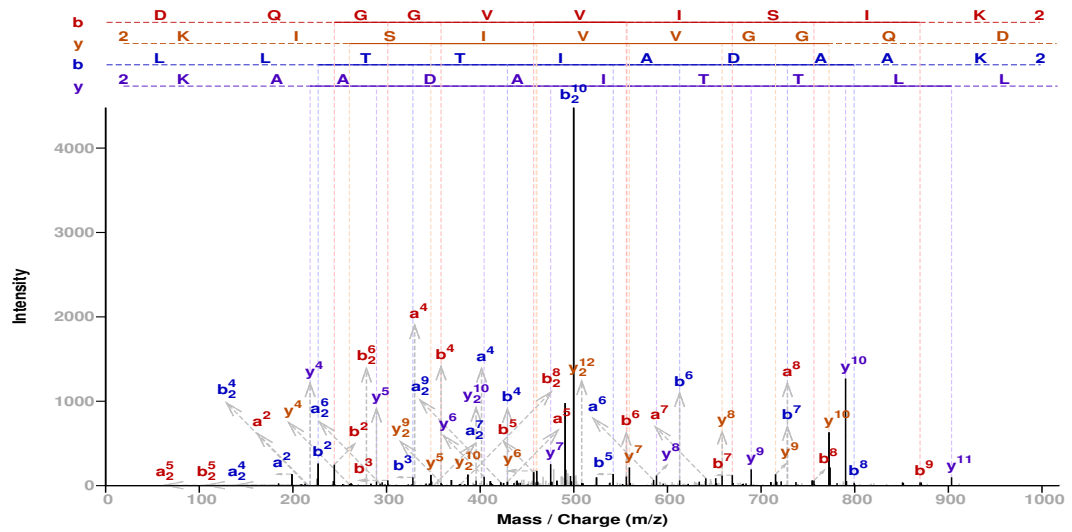



yeast01\_Scan\_Number\_3289 Precursor m/z: 407.245 cosine: 0.824  $\alpha$ : 0.194

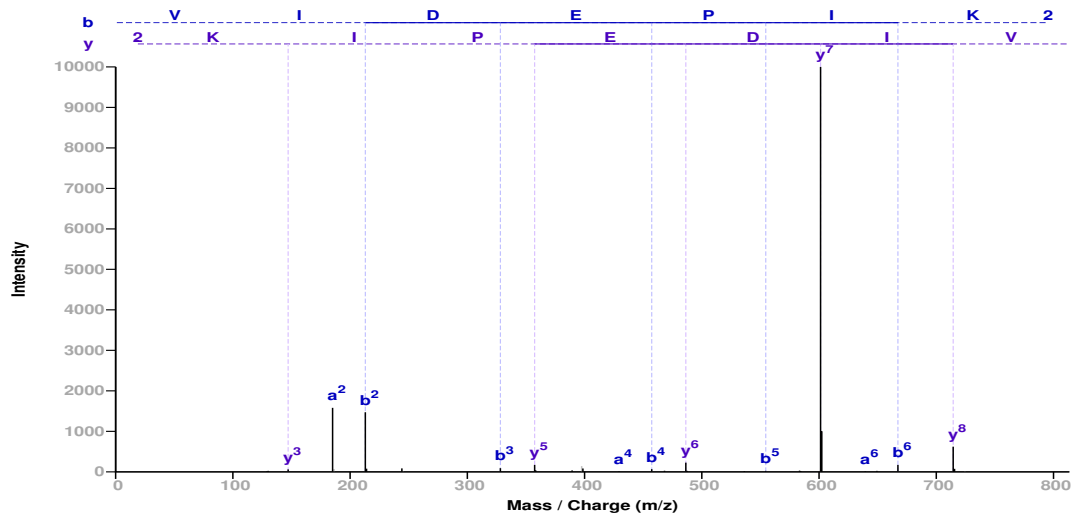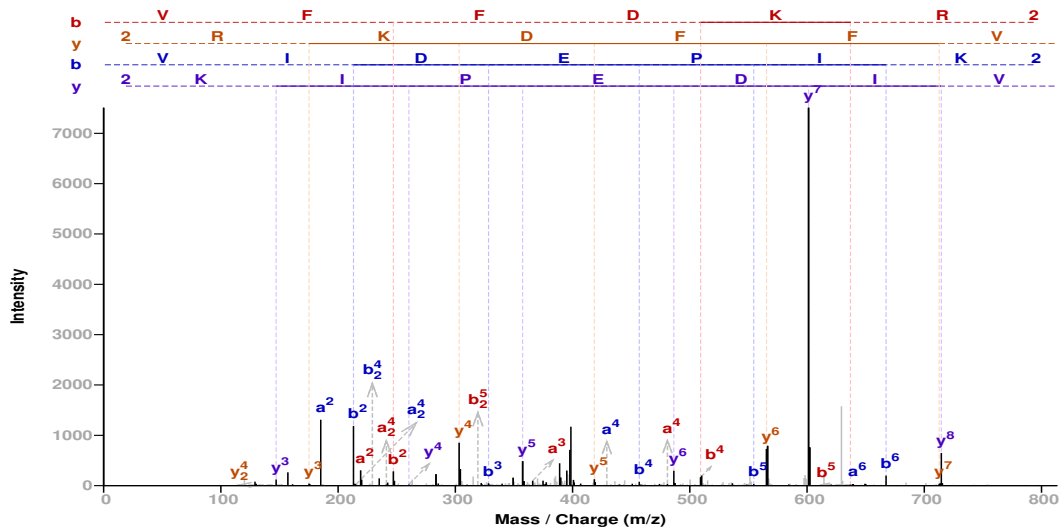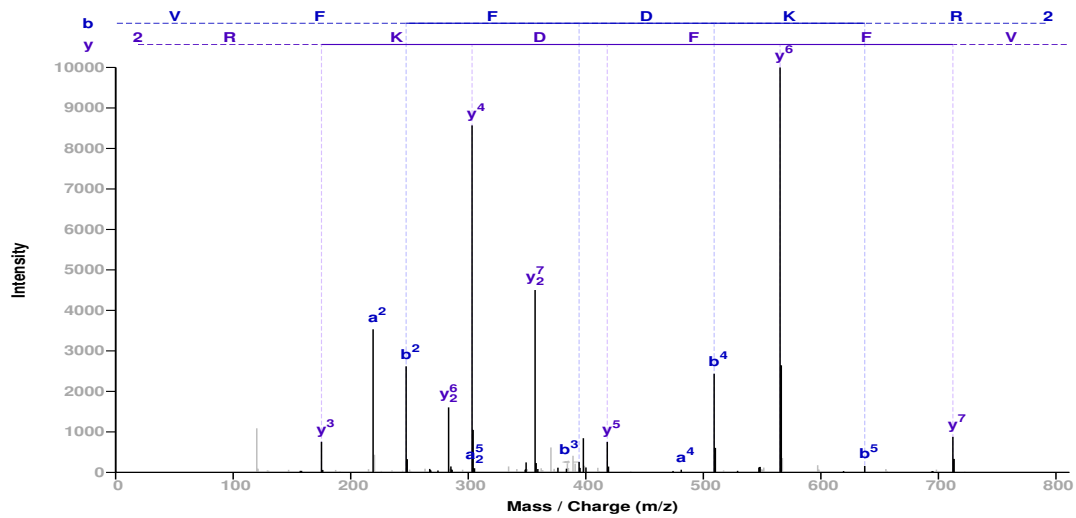

yeast01\_Scan\_Number\_7645 Precursor m/z: 592.333 cosine: 0.889  $\alpha$ : 0.194

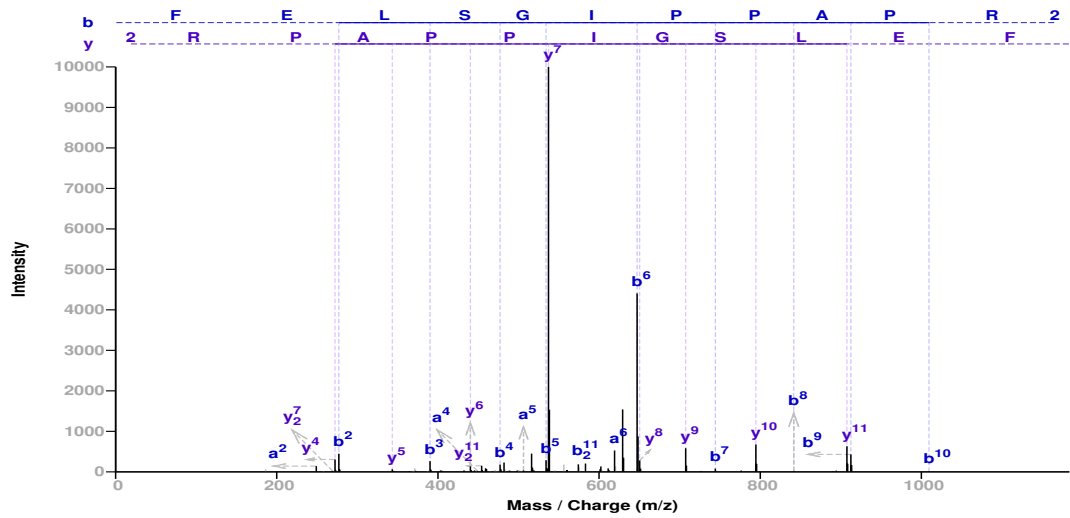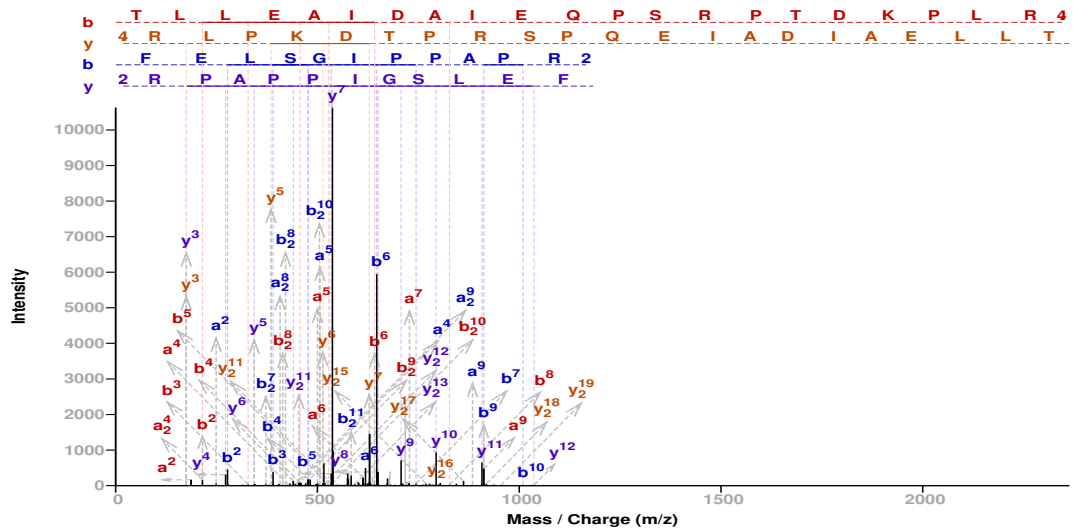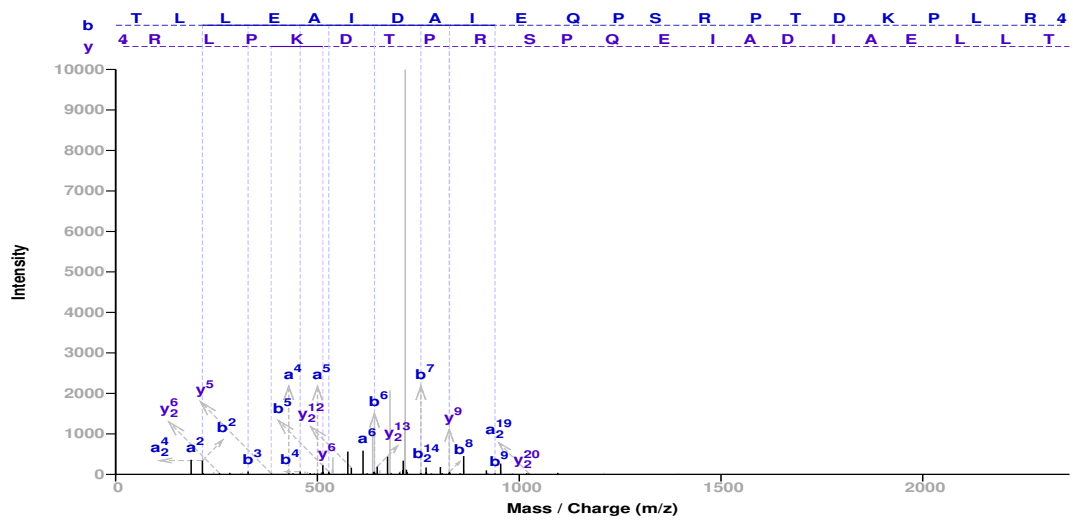

yeast01\_Scan\_Number\_5986 Precursor m/z: 399.892 cosine: 0.756  $\alpha$ : 0.193

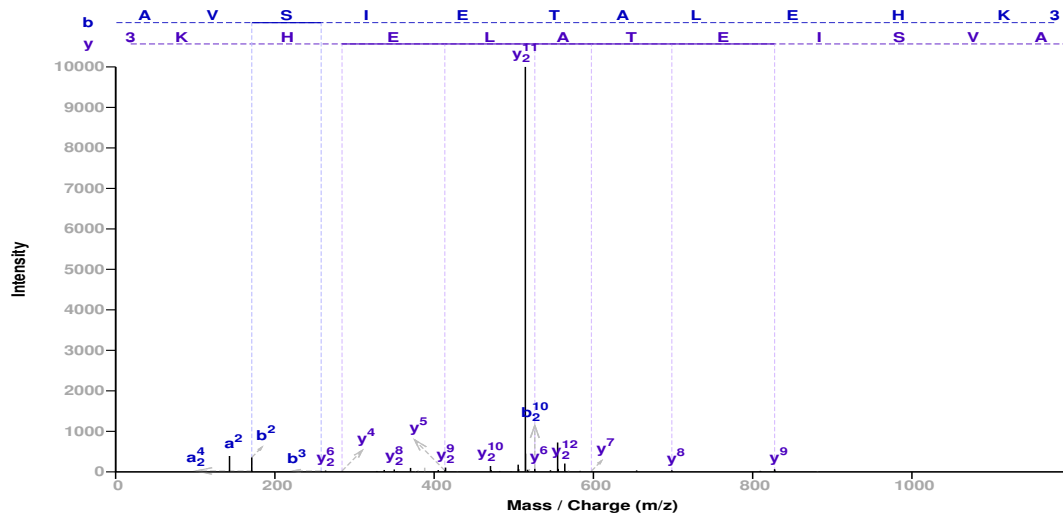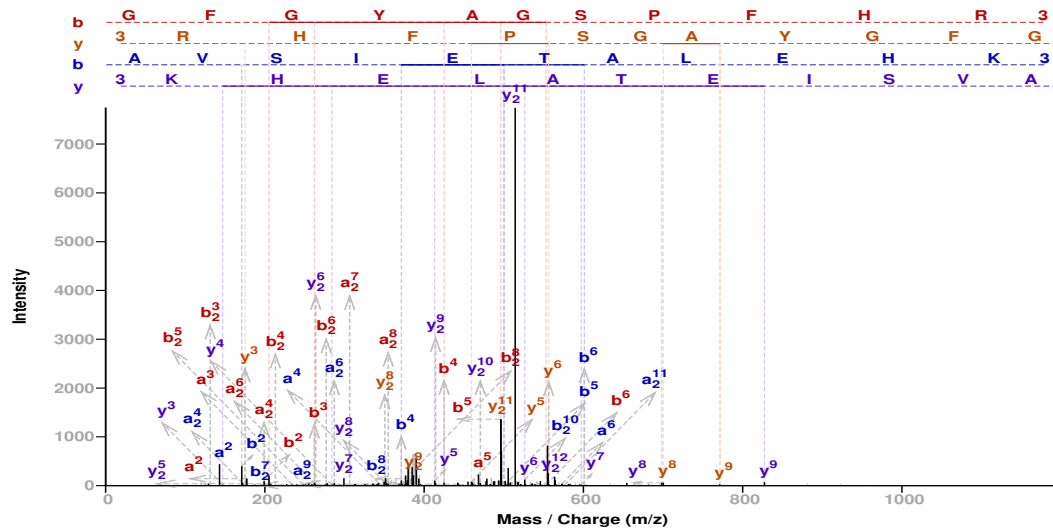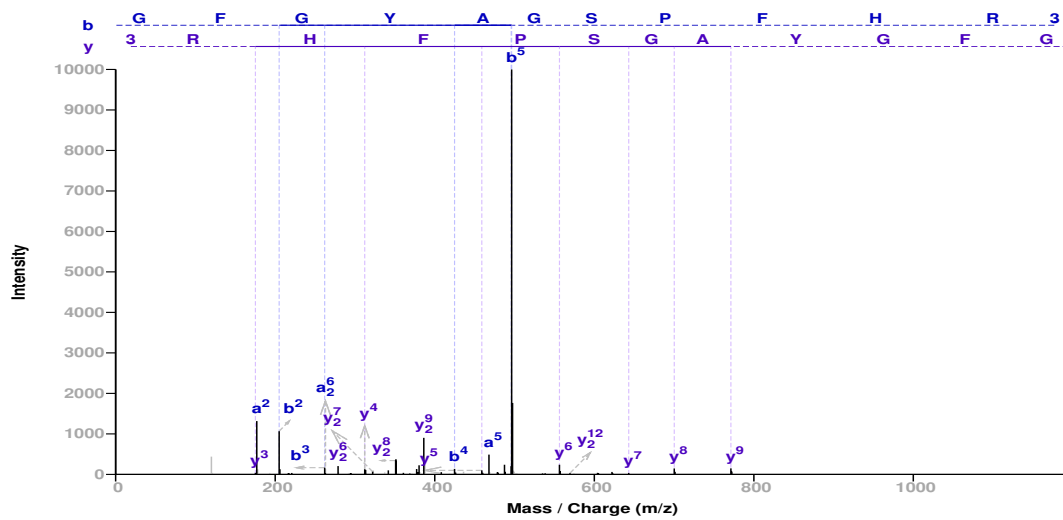

yeast01\_Scan\_Number\_7887 Precursor m/z: 813.467 cosine: 0.826  $\alpha$ : 0.191

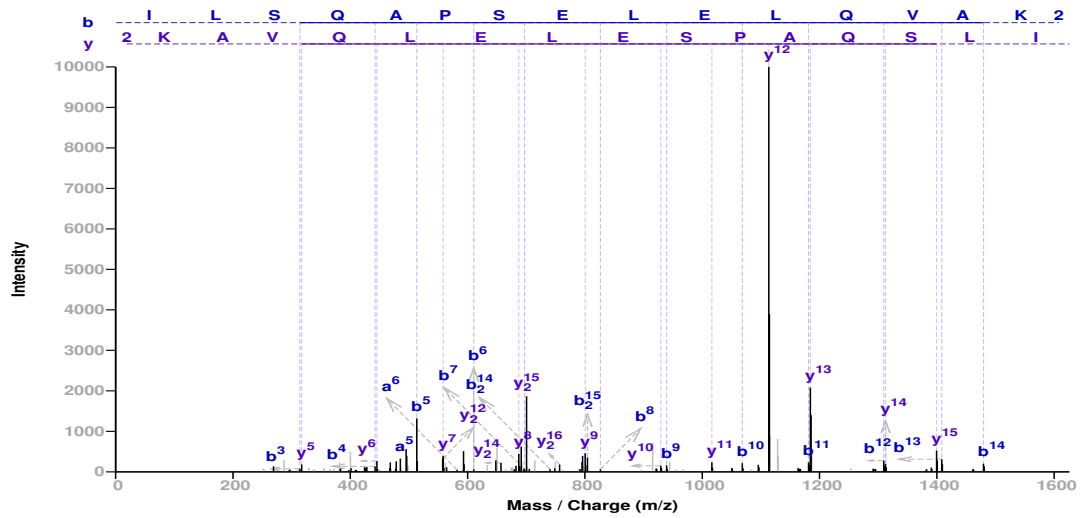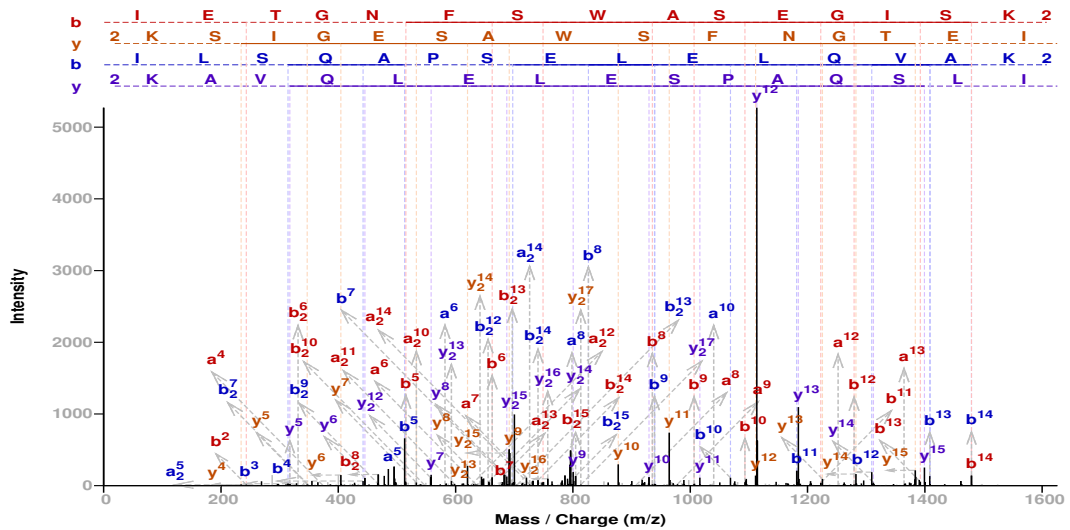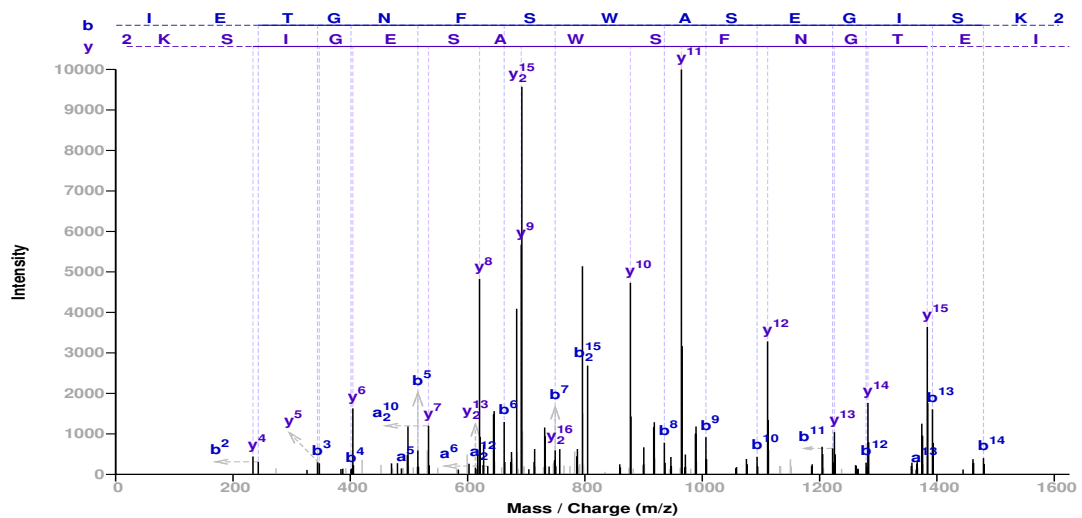

yeast01.Scan\_Number\_6160 Precursor m/z: 799.918 cosine: 0.870  $\alpha$ : 0.188

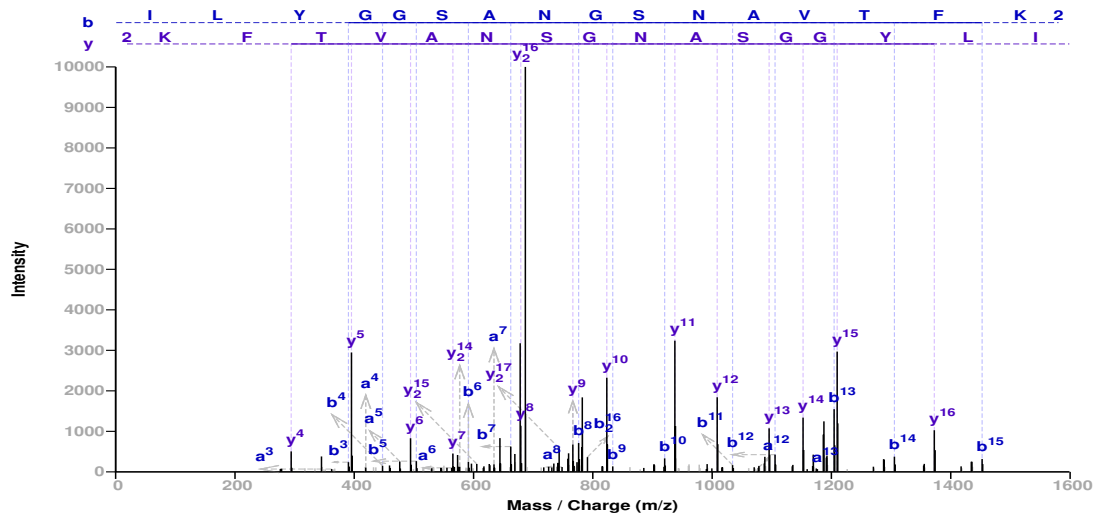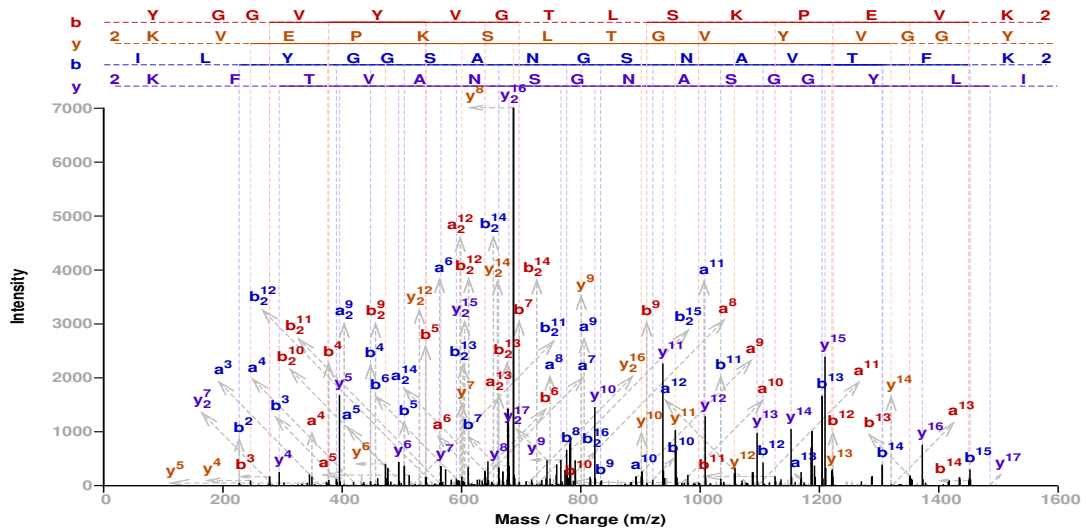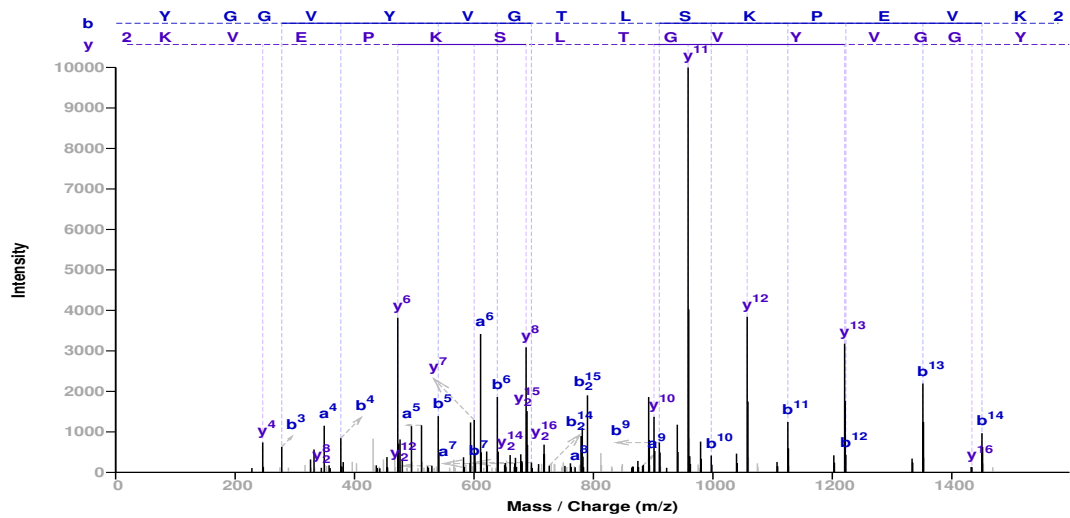

yeast01.Scan\_Number\_2986 Precursor m/z: 396.721 cosine: 0.818  $\alpha$ : 0.188

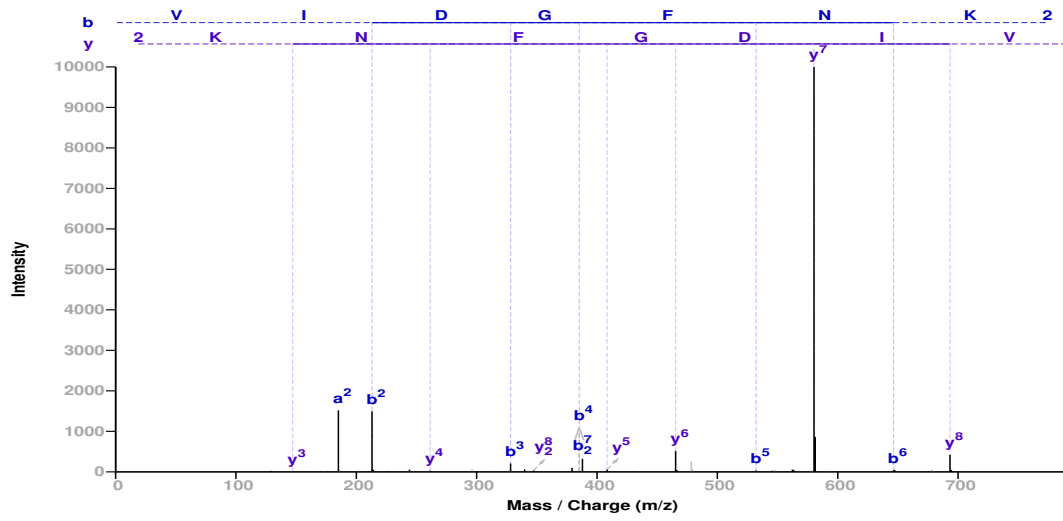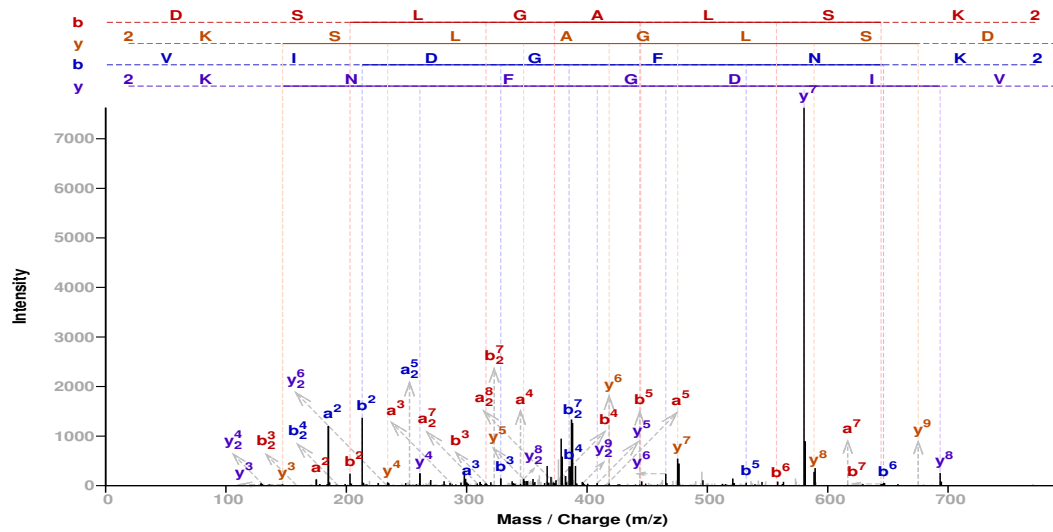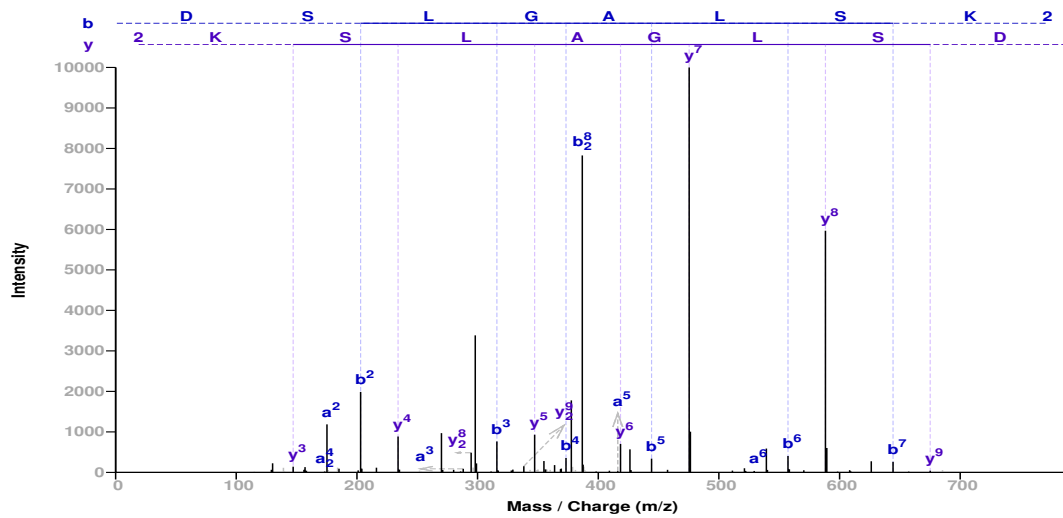

yeast01\_Scan\_Number\_8846 Precursor m/z: 429.586 cosine: 0.791  $\alpha$ : 0.186

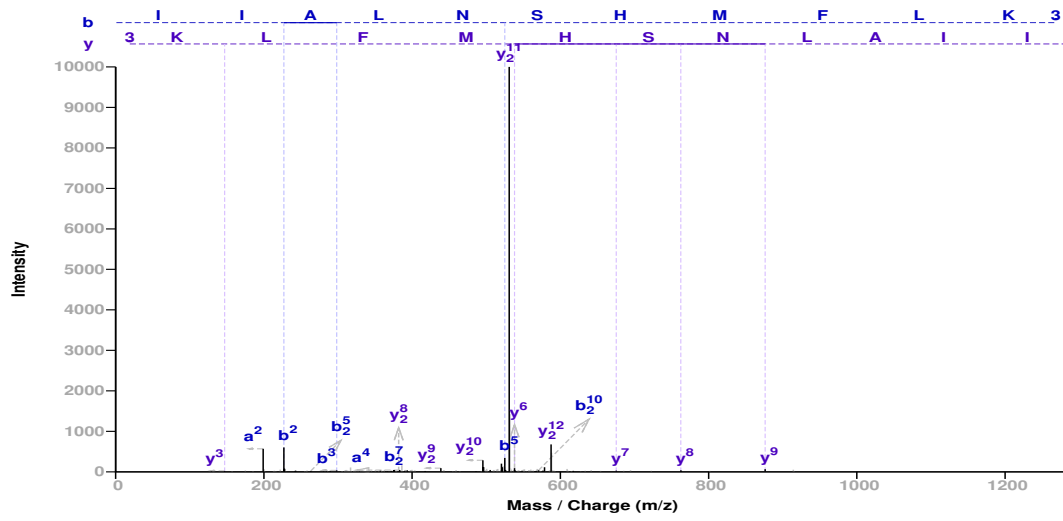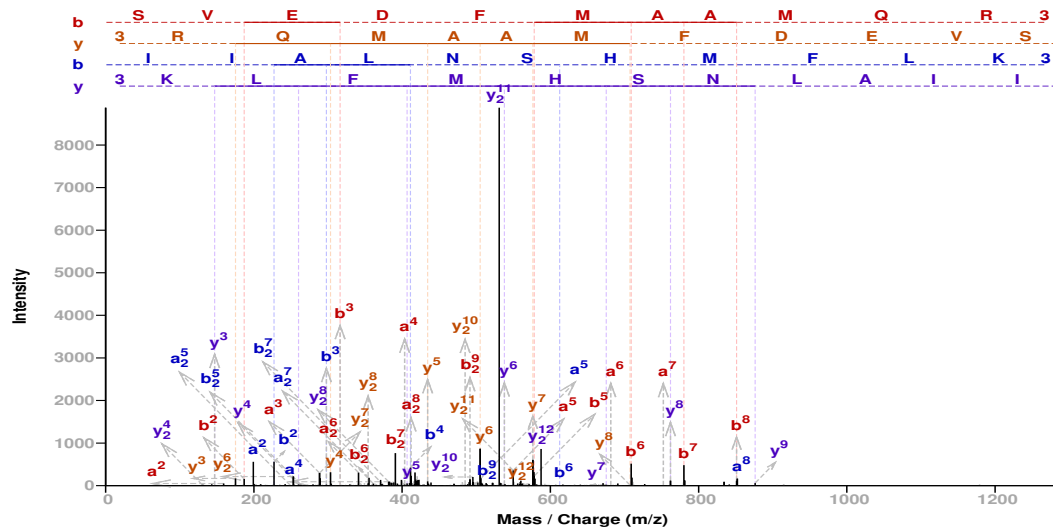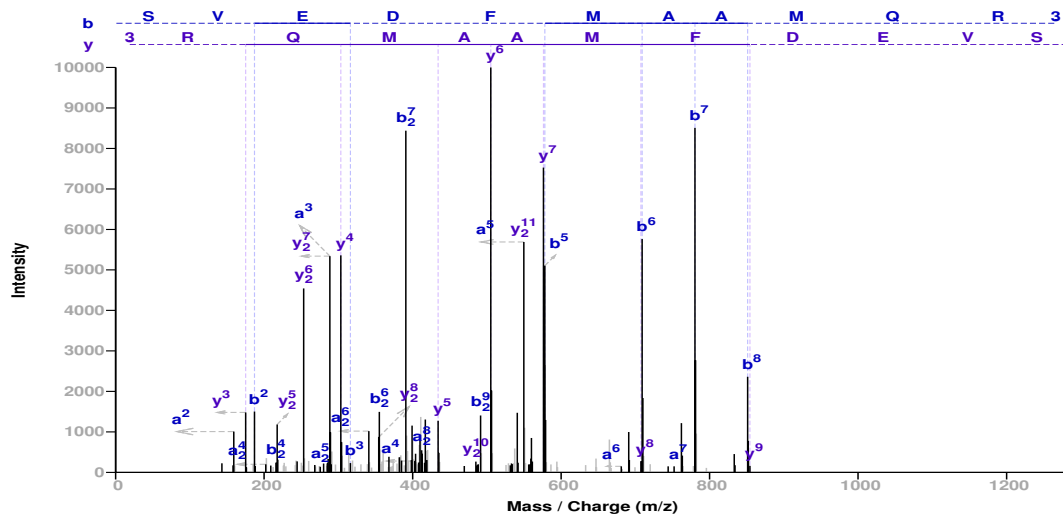

yeast01\_Scan\_Number\_4455 Precursor m/z: 492.782 cosine: 0.829  $\alpha$ : 0.168

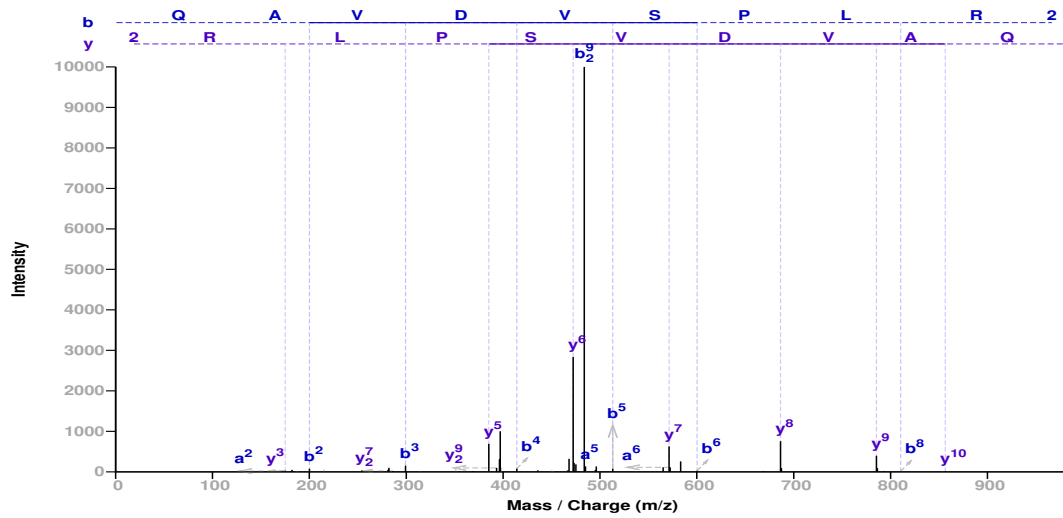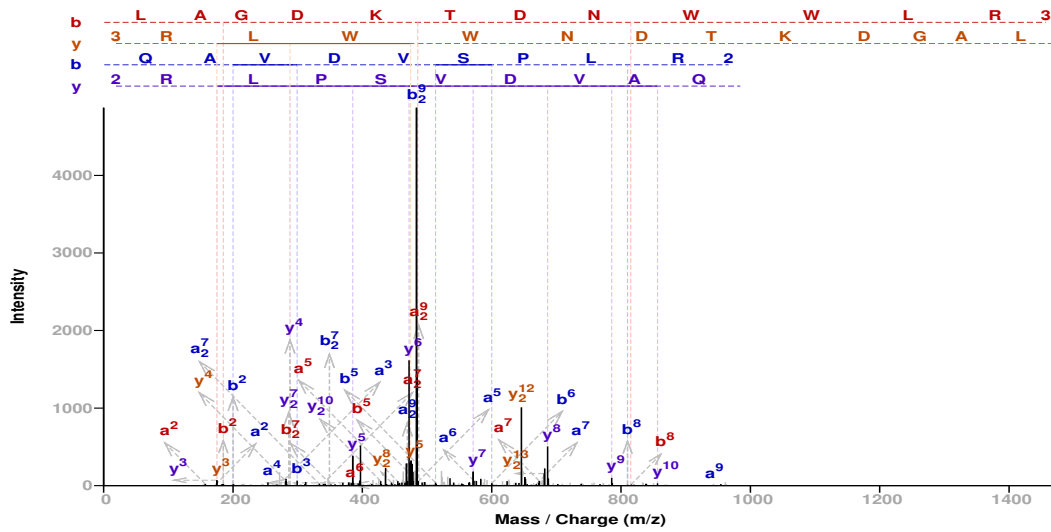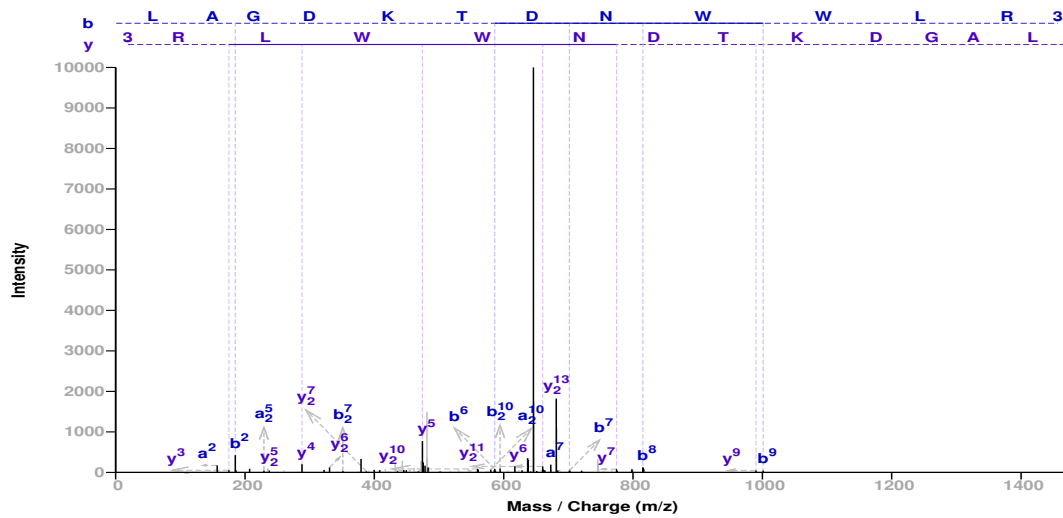



yeast01\_Scan\_Number\_3539 Precursor m/z: 572.826 cosine: 0.759  $\alpha$ : 0.167

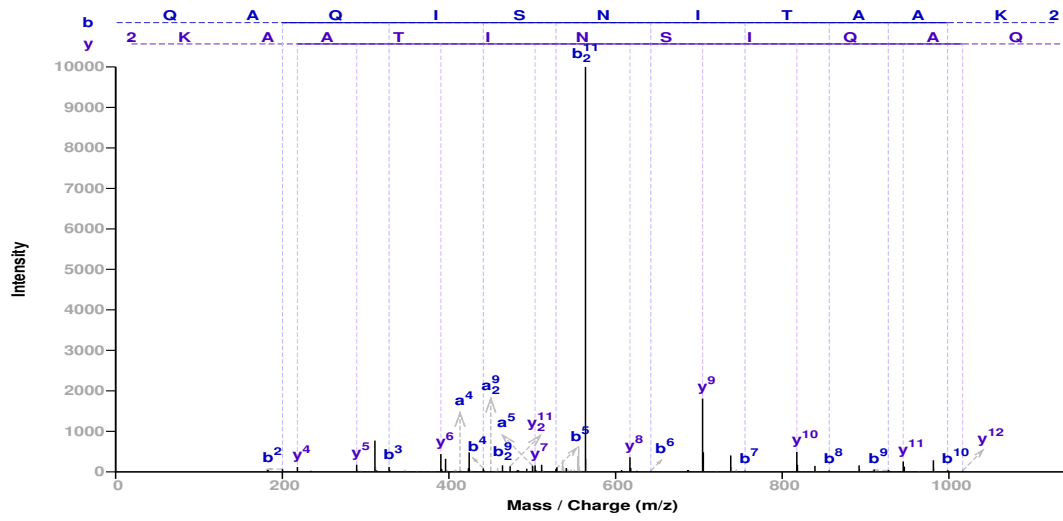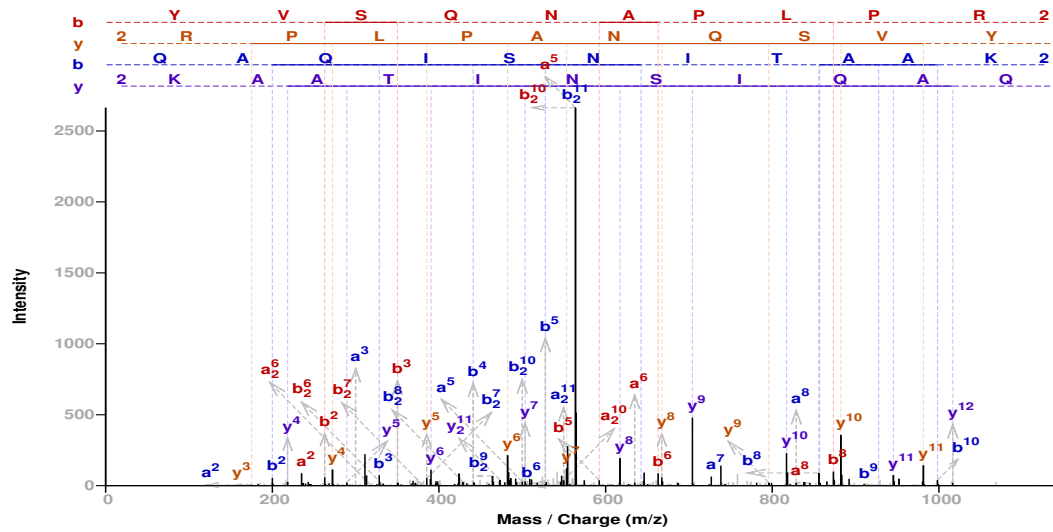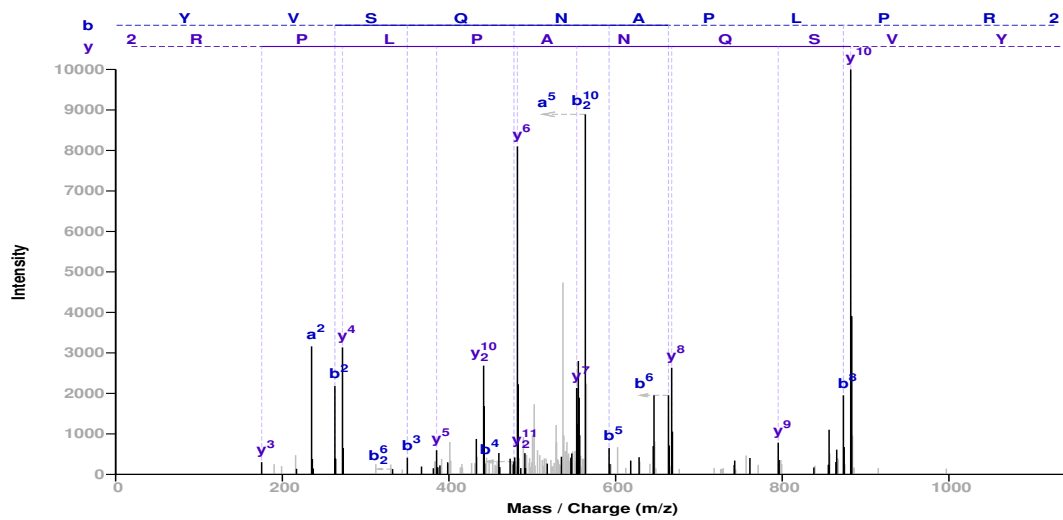

yeast01\_Scan\_Number\_5694 Precursor m/z: 466.755 cosine: 0.871  $\alpha$ : 0.165

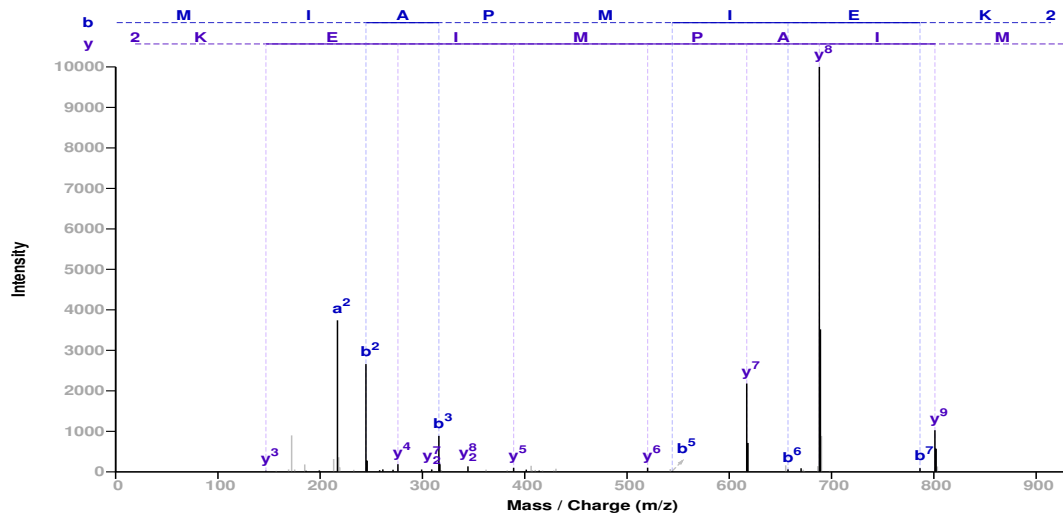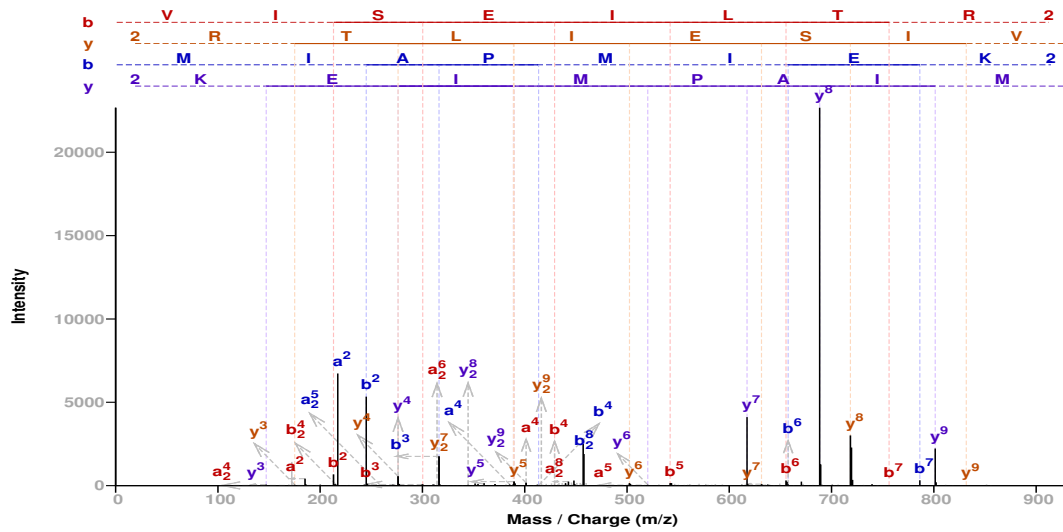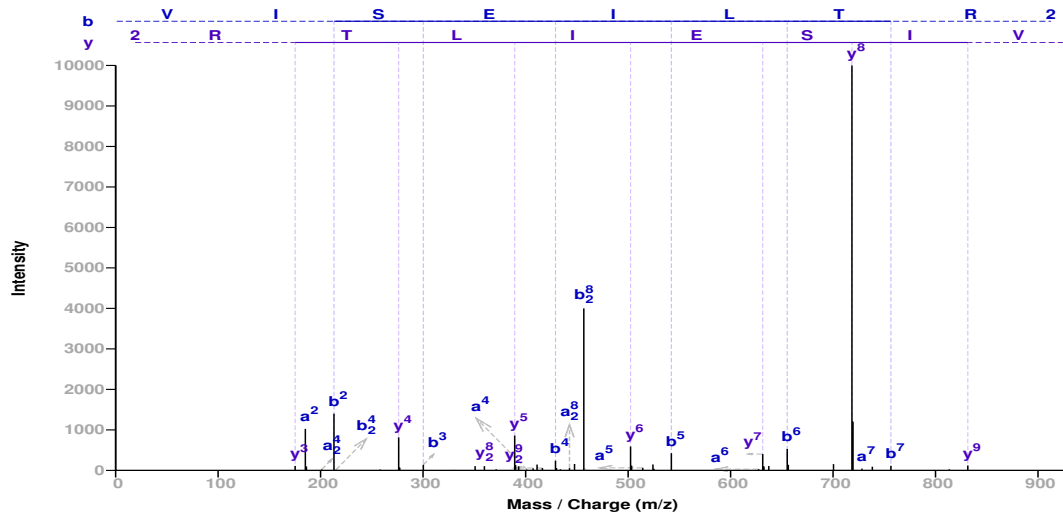

yeast01\_Scan\_Number\_6799 Precursor m/z: 722.894 cosine: 0.908  $\alpha$ : 0.158

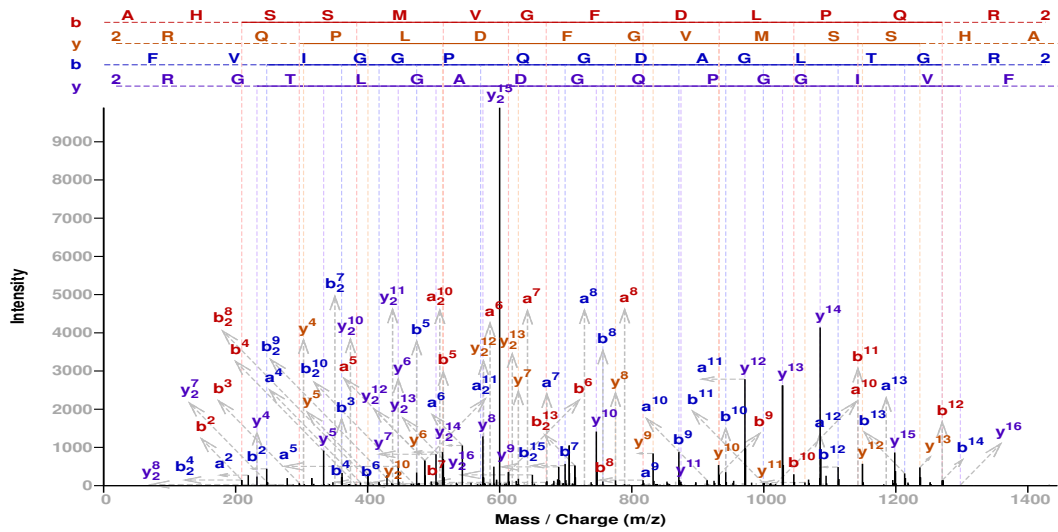

yeast01.Scan\_Number\_2165 Precursor m/z: 387.232 cosine: 0.888  $\alpha$ : 0.158

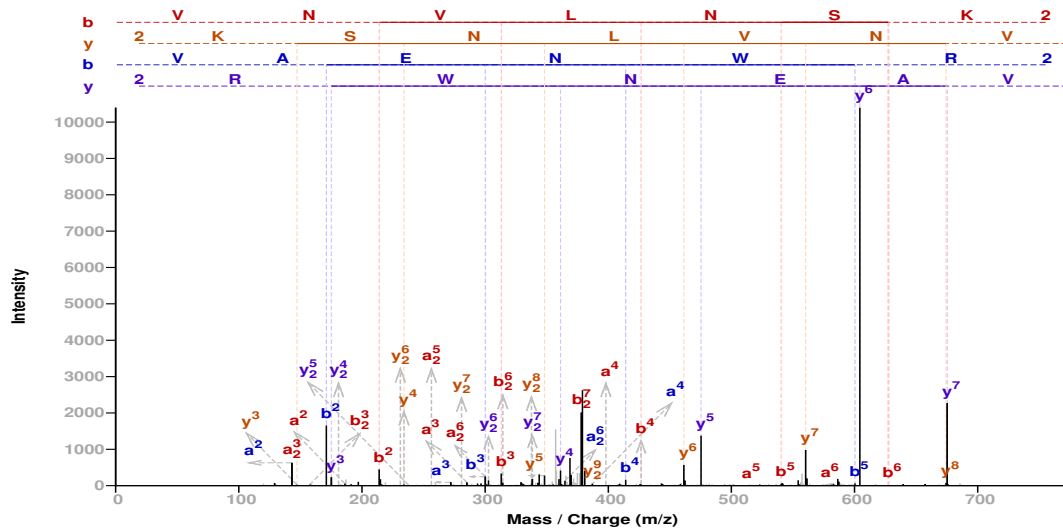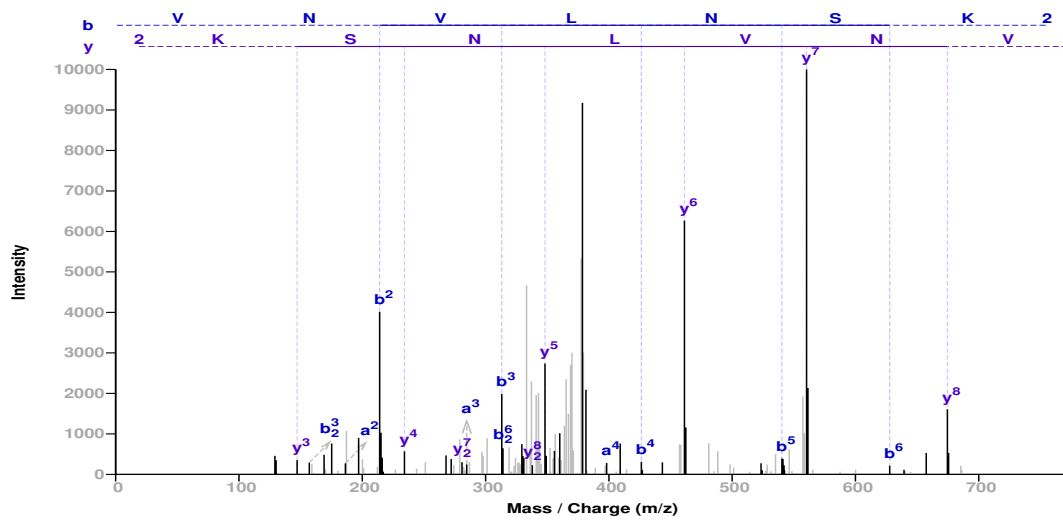

yeast01\_Scan\_Number\_4350 Precursor m/z: 379.533 cosine: 0.832  $\alpha$ : 0.154

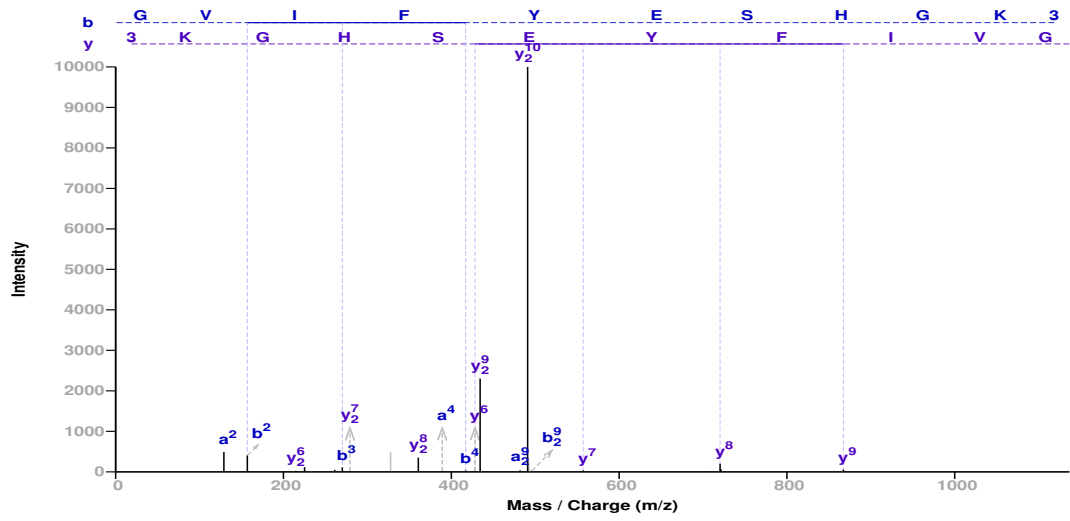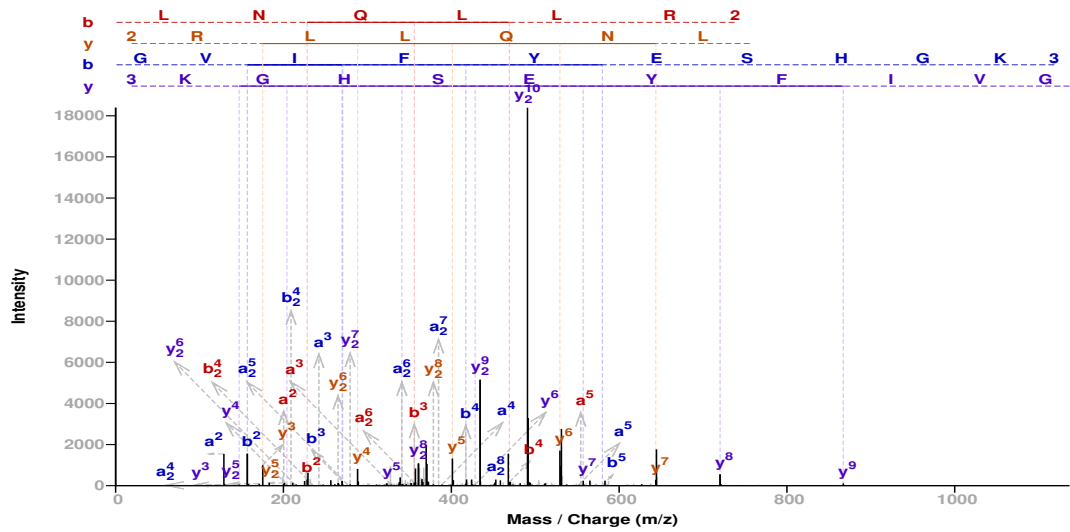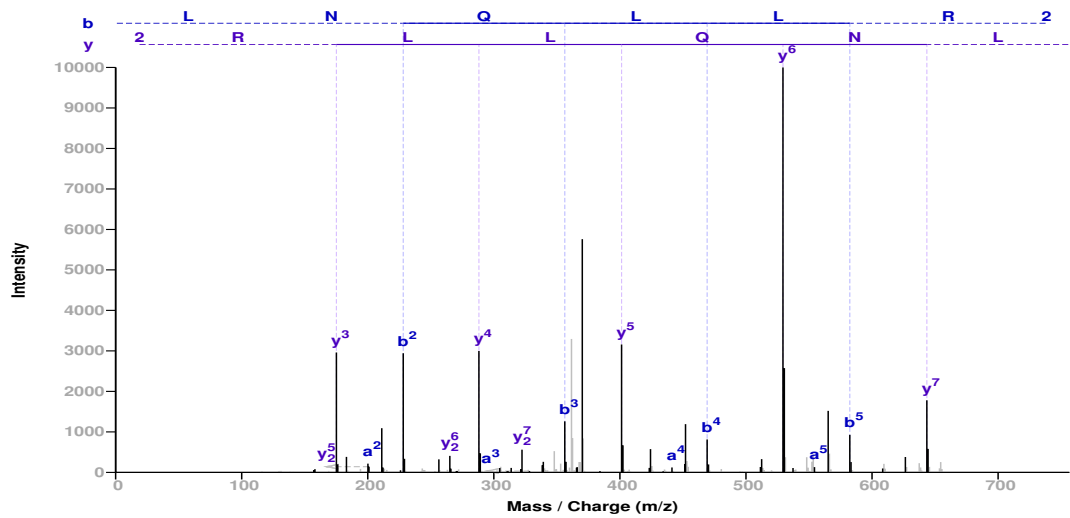

yeast01\_Scan\_Number\_8046 Precursor m/z: 422.772 cosine: 0.894  $\alpha$ : 0.154

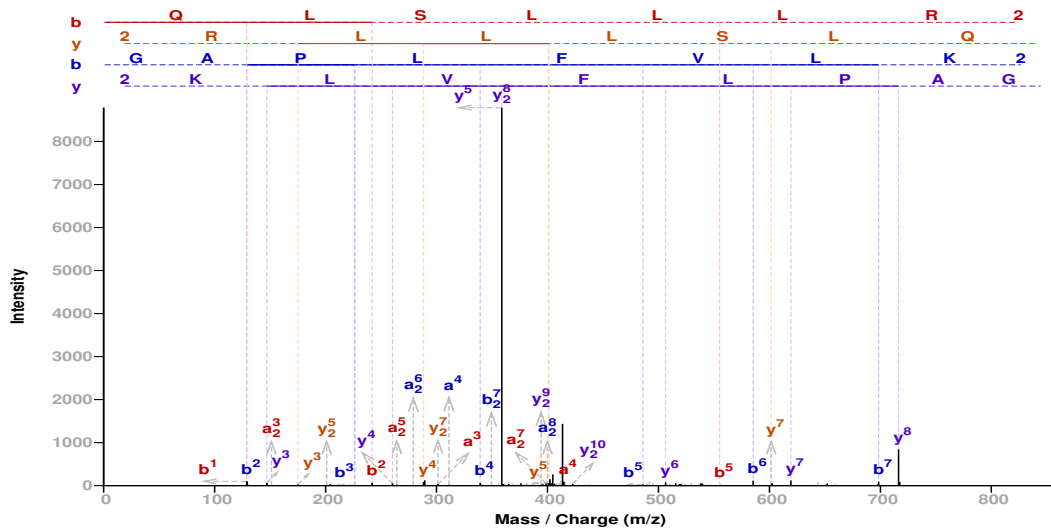

yeast01\_Scan\_Number\_3995 Precursor m/z: 503.261 cosine: 0.872  $\alpha$ : 0.152

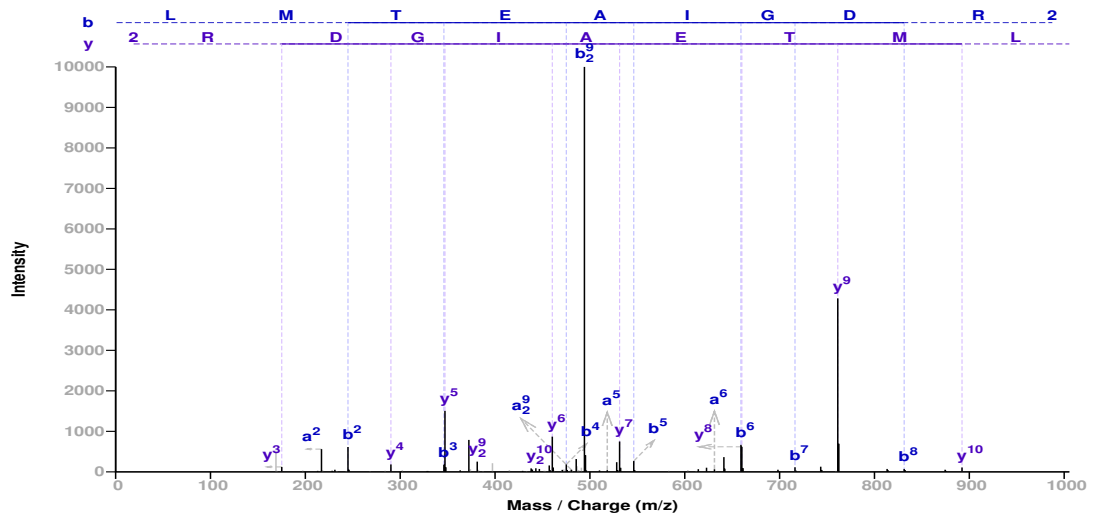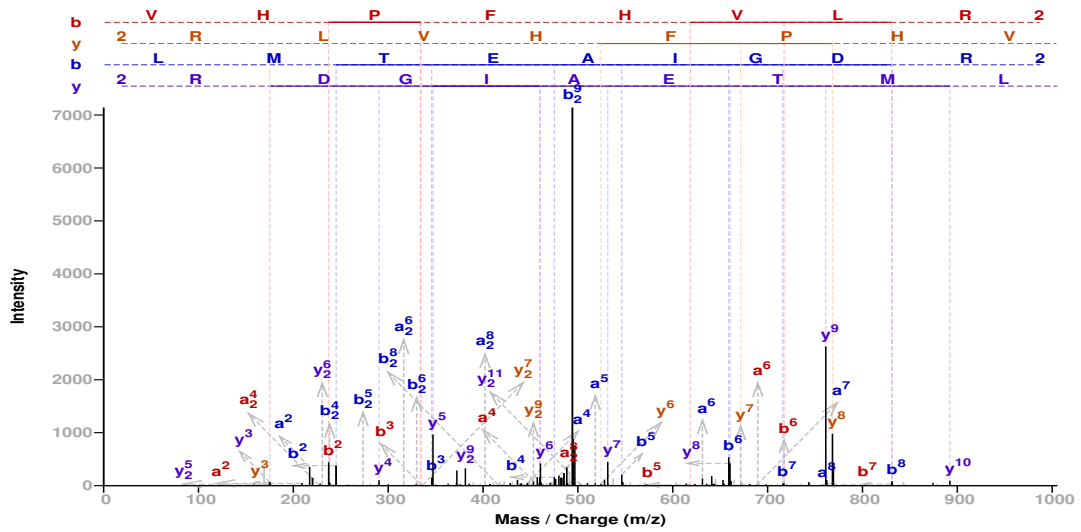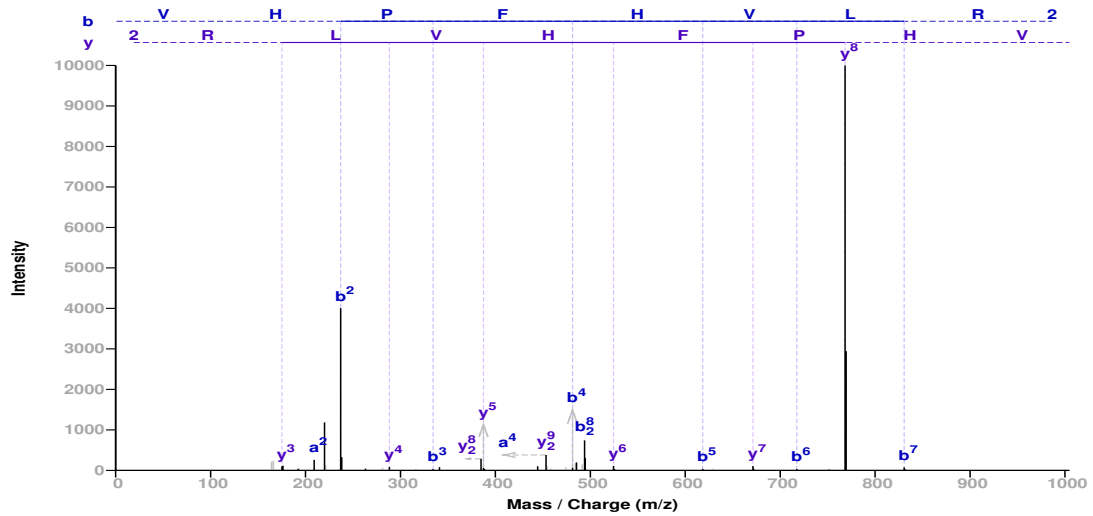

yeast01\_Scan\_Number\_4636 Precursor m/z: 440.734 cosine: 0.880  $\alpha$ : 0.151

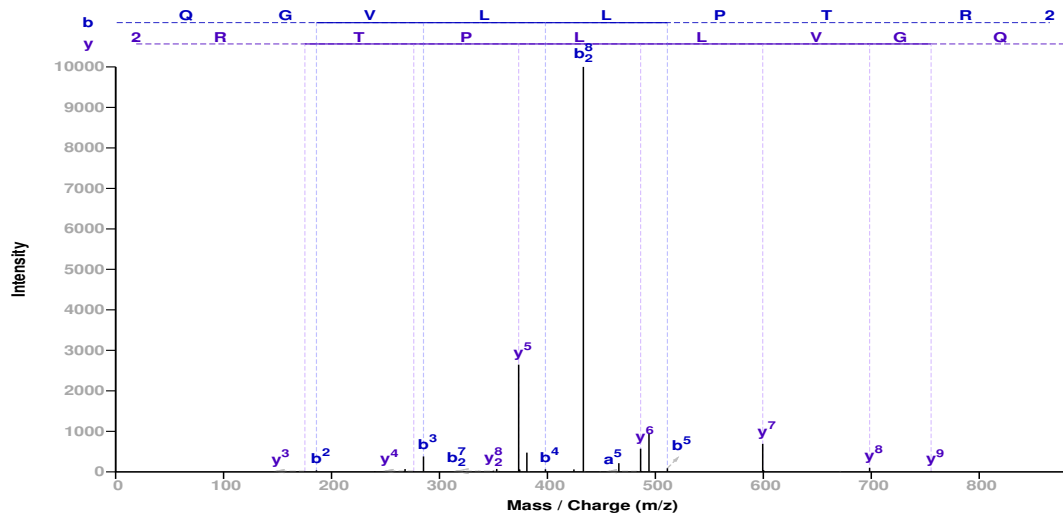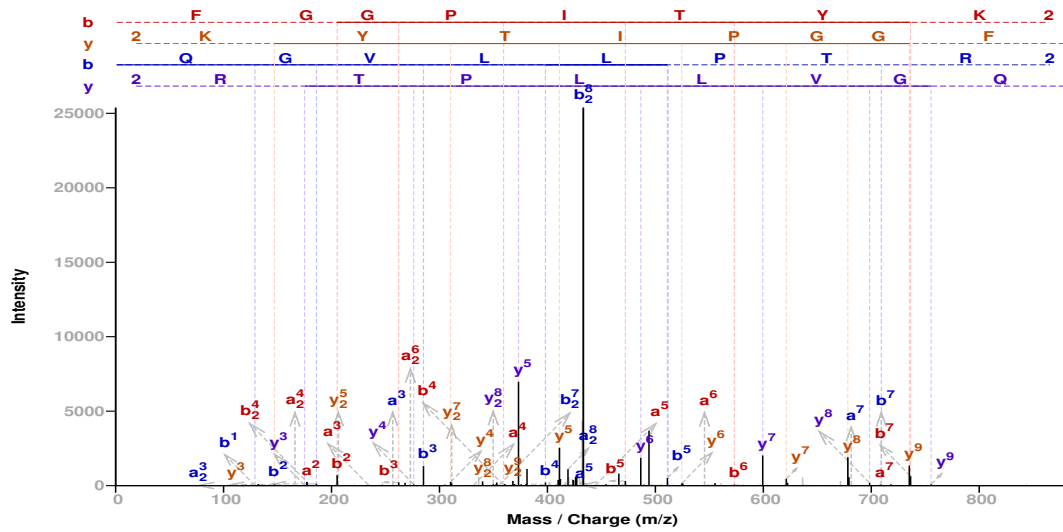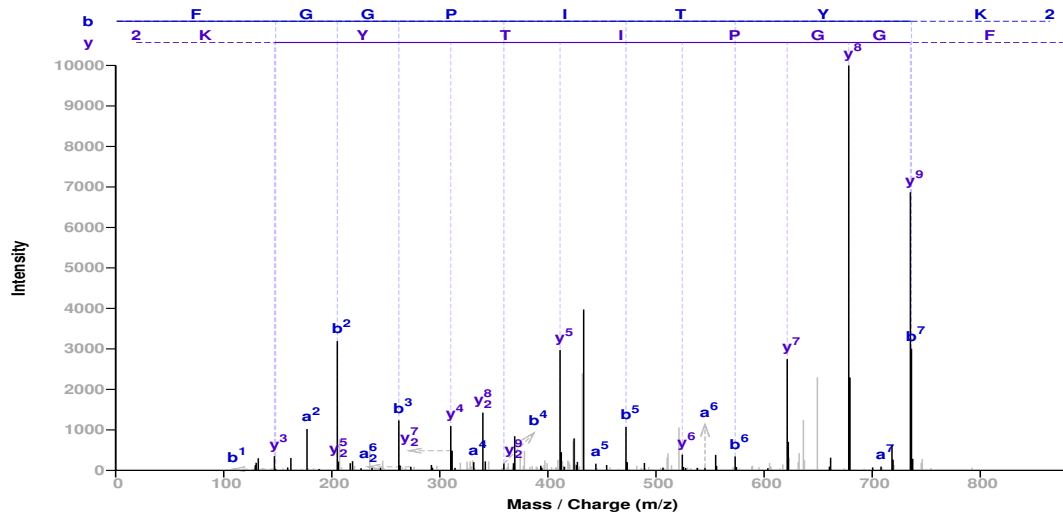



yeast01\_Scan\_Number\_3456 Precursor m/z: 492.813 cosine: 0.927  $\alpha$ : 0.142

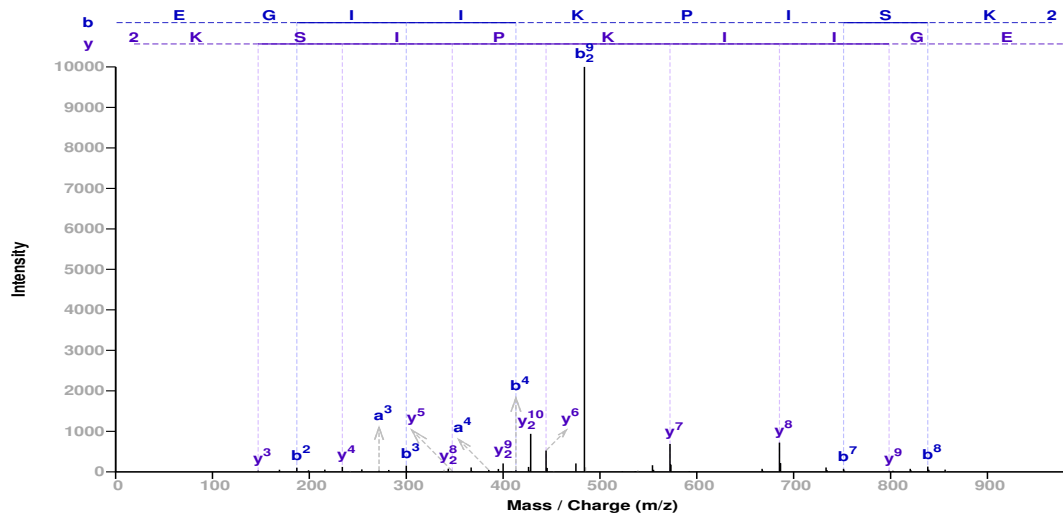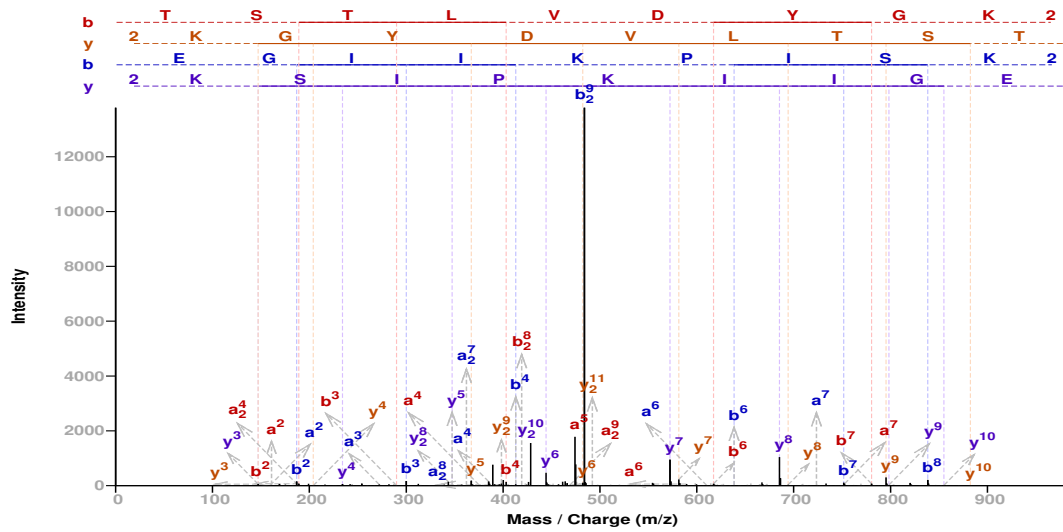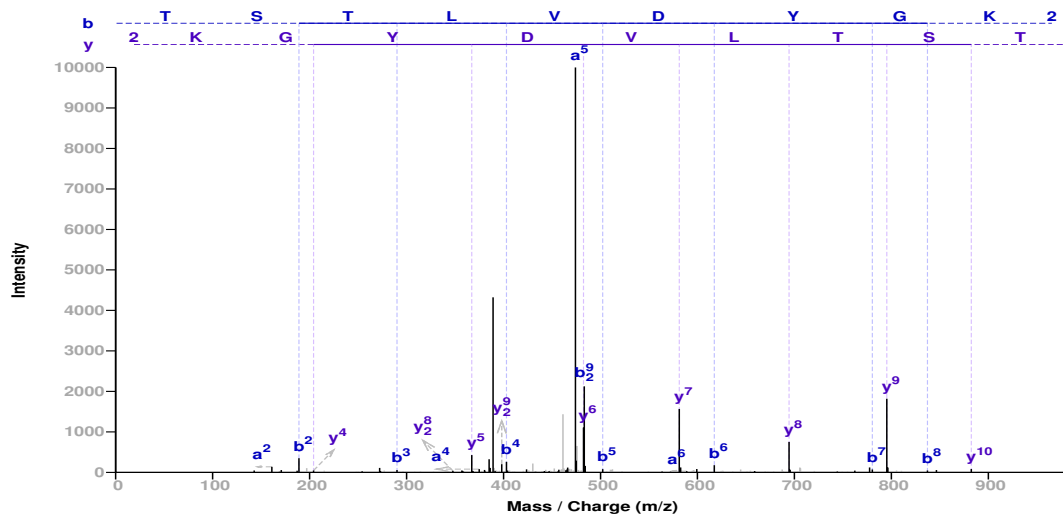

yeast01\_Scan\_Number\_8790 Precursor m/z: 828.103 cosine: 0.808  $\alpha$ : 0.128

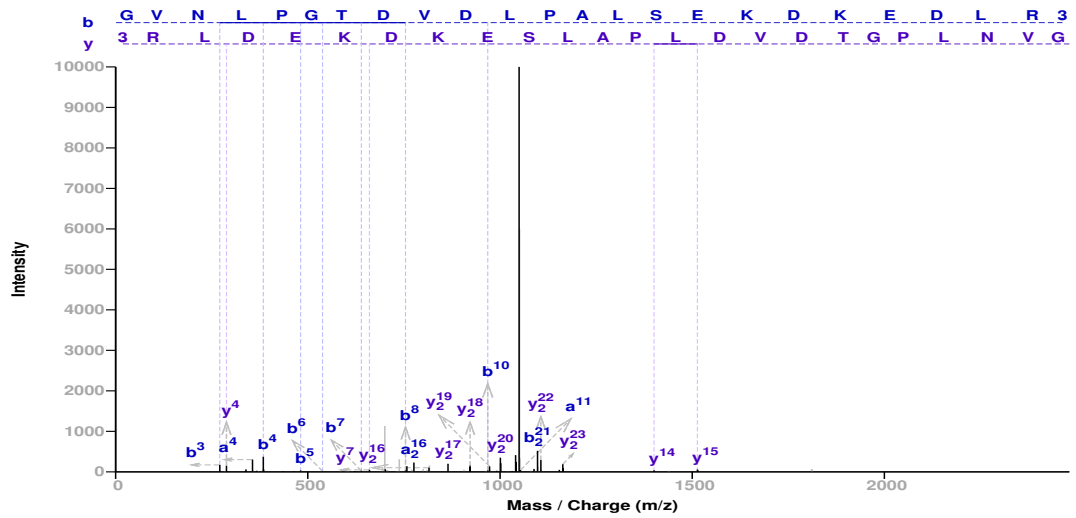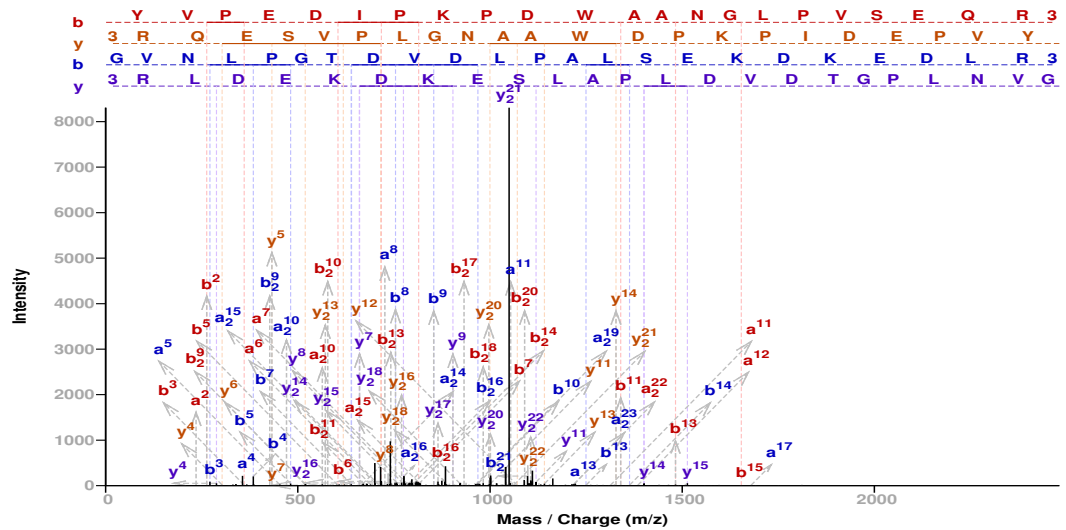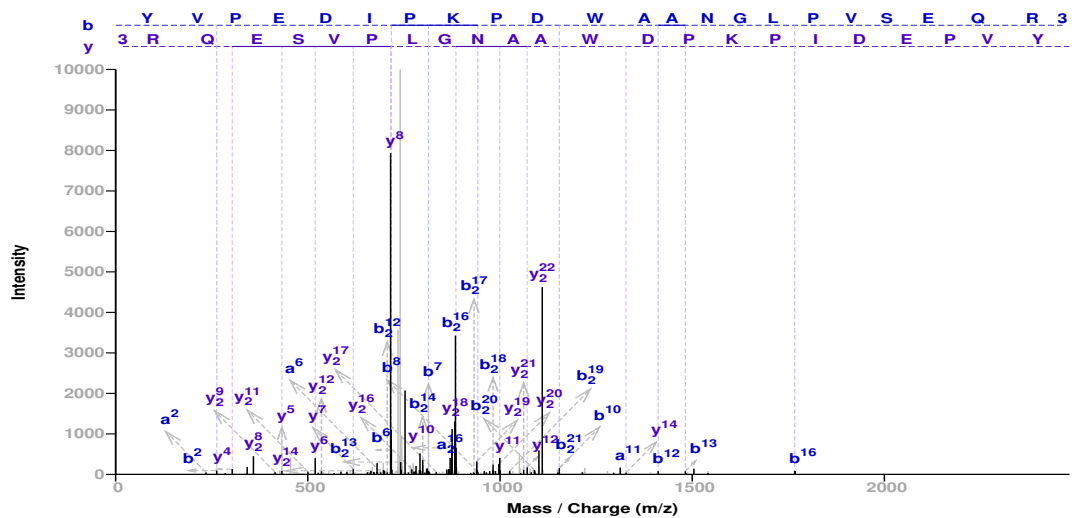

yeast01\_Scan\_Number\_6781 Precursor m/z: 443.770 cosine: 0.792  $\alpha$ : 0.126

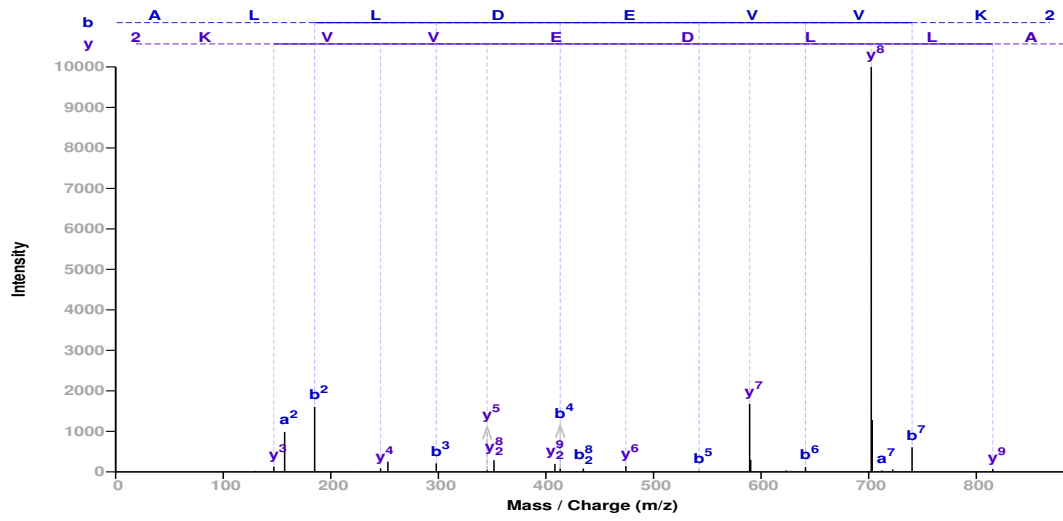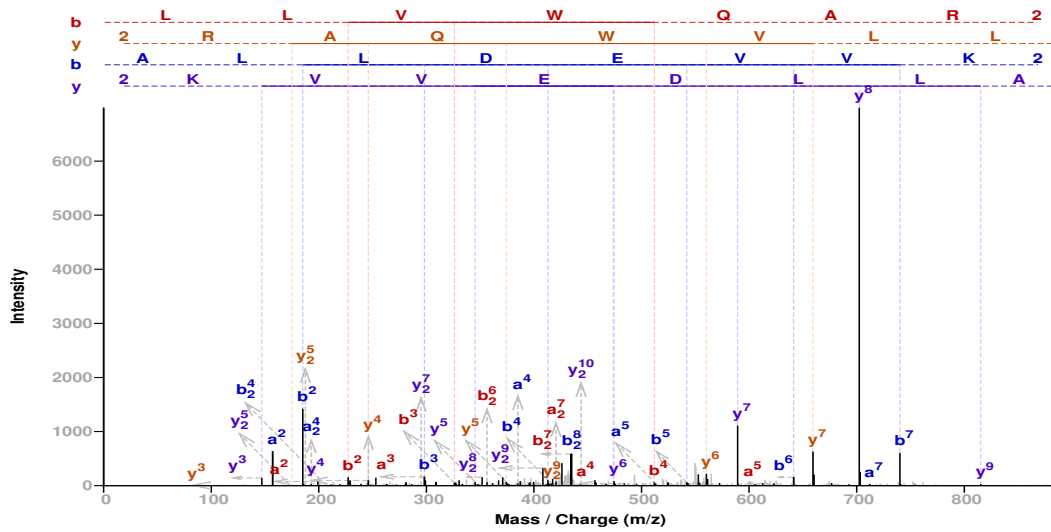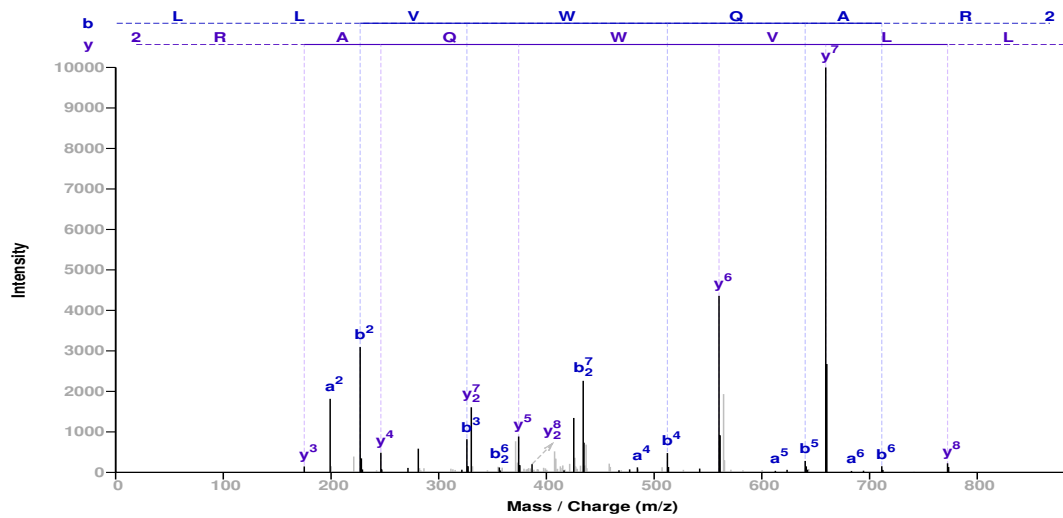

yeast01\_Scan\_Number\_2401 Precursor m/z: 397.710 cosine: 0.890  $\alpha$ : 0.125

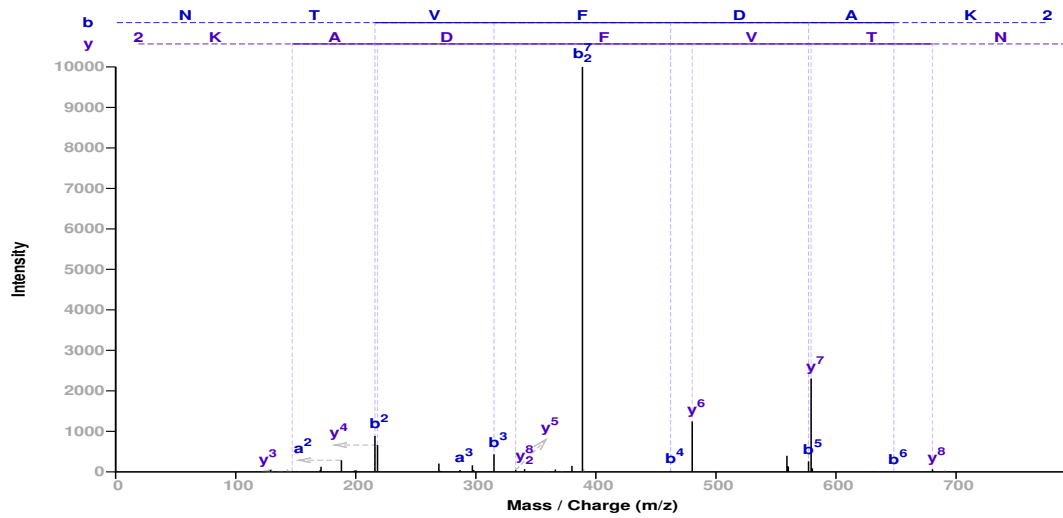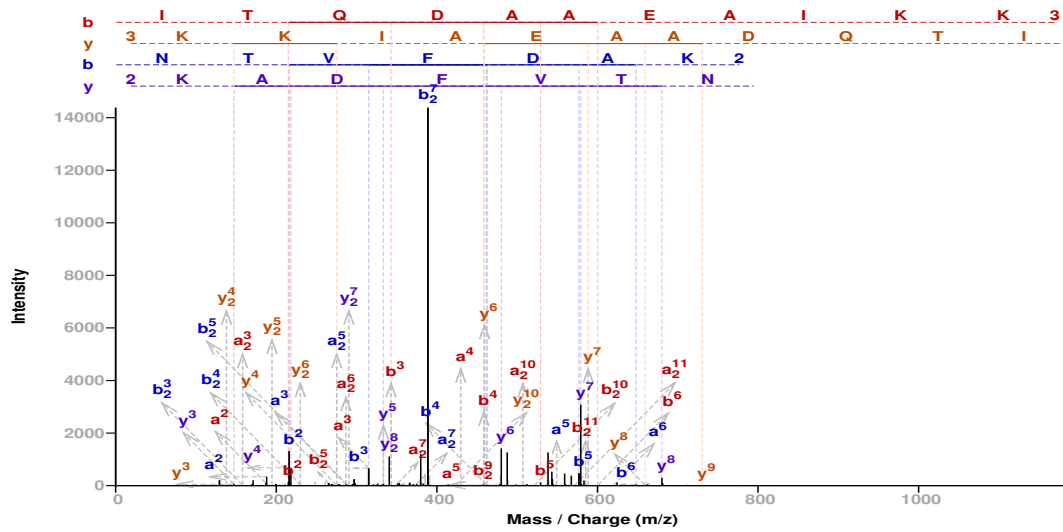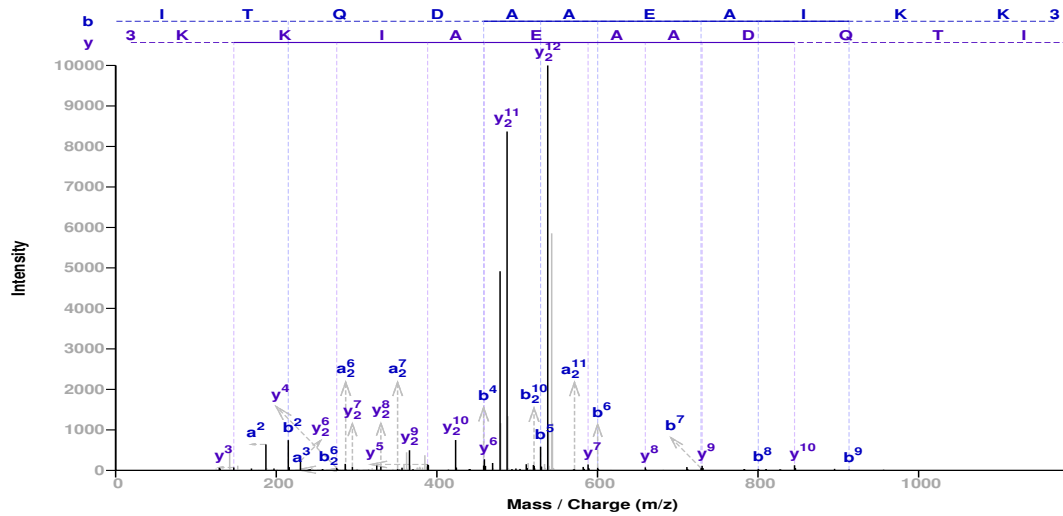

yeast01\_Scan\_Number\_2296 Precursor m/z: 369.204 cosine: 0.887  $\alpha$ : 0.116

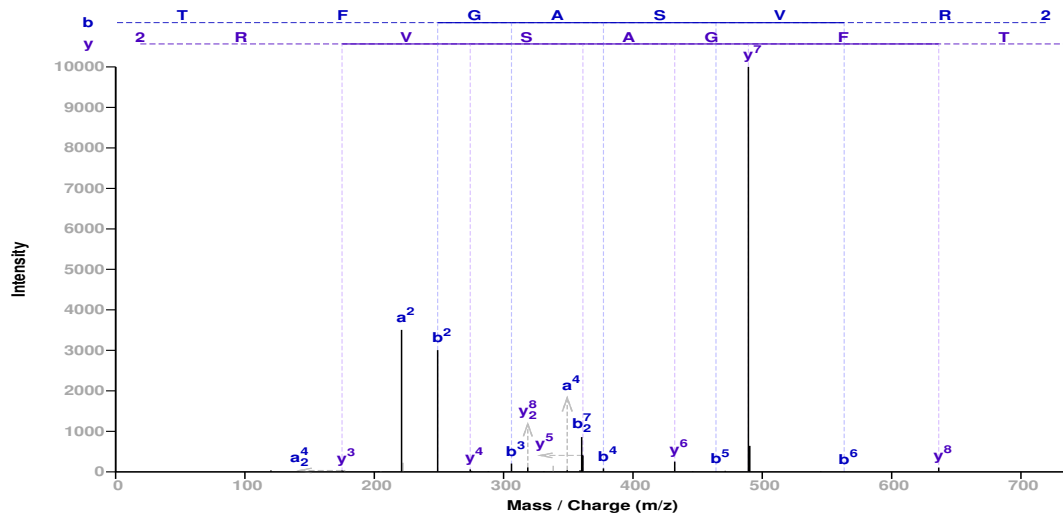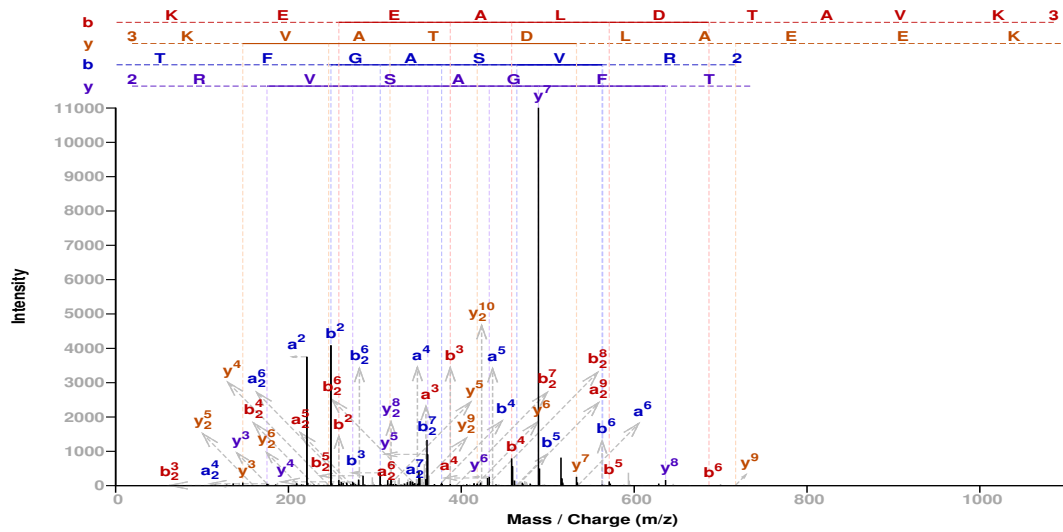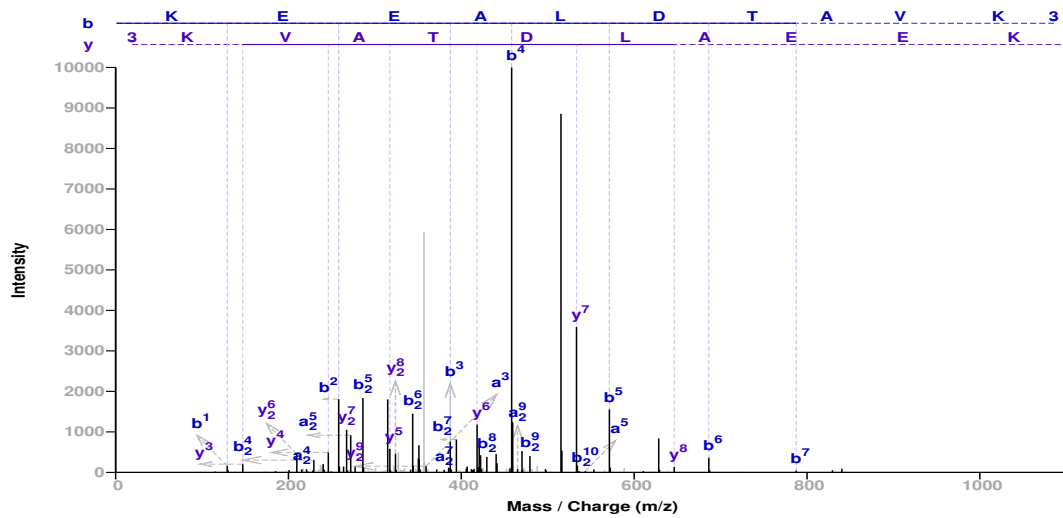





yeast01\_Scan\_Number\_10087 Precursor m/z: 630.721 cosine: 0.834  $\alpha$ : 0.100

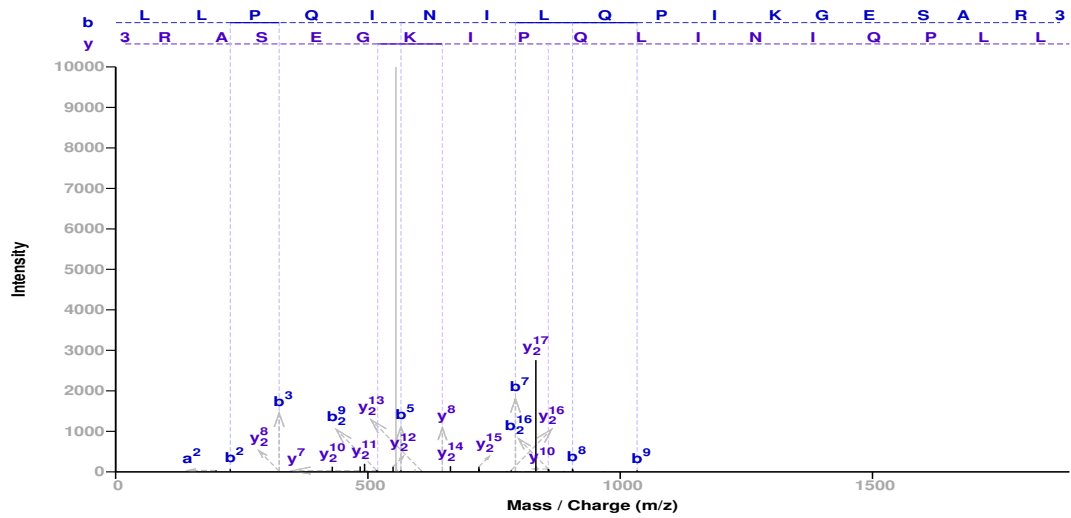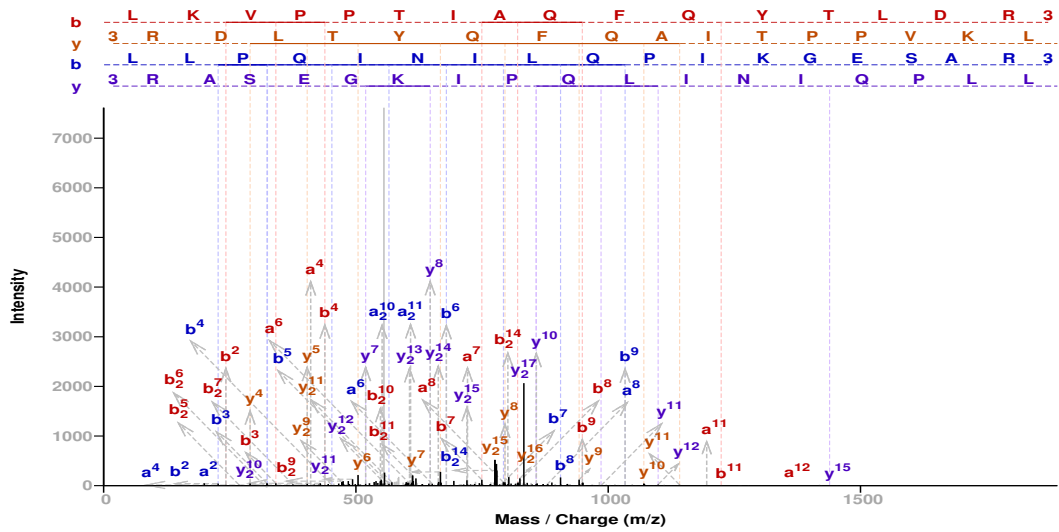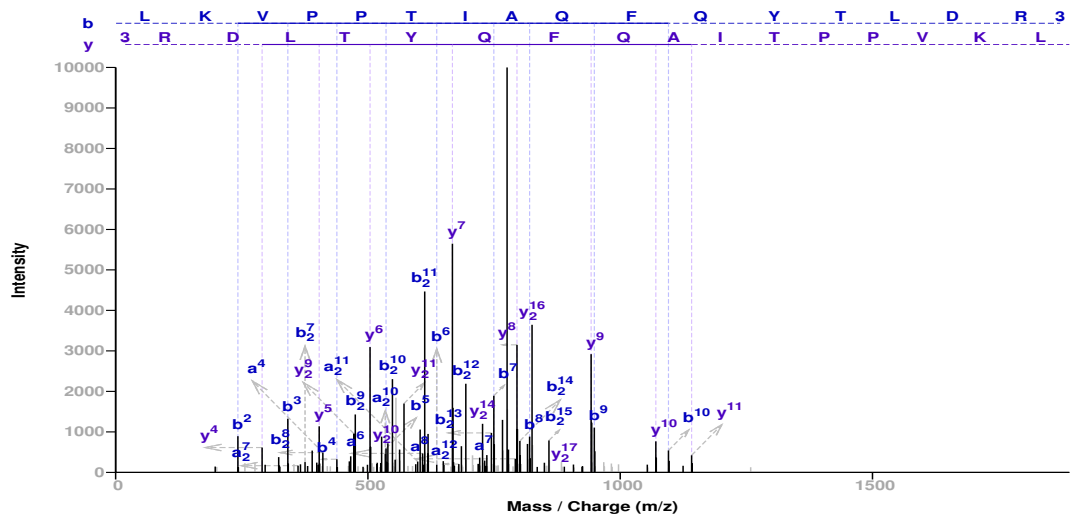





yeast01\_Scan\_Number\_6722 Precursor m/z: 812.914 cosine: 0.859  $\alpha$ : 0.100

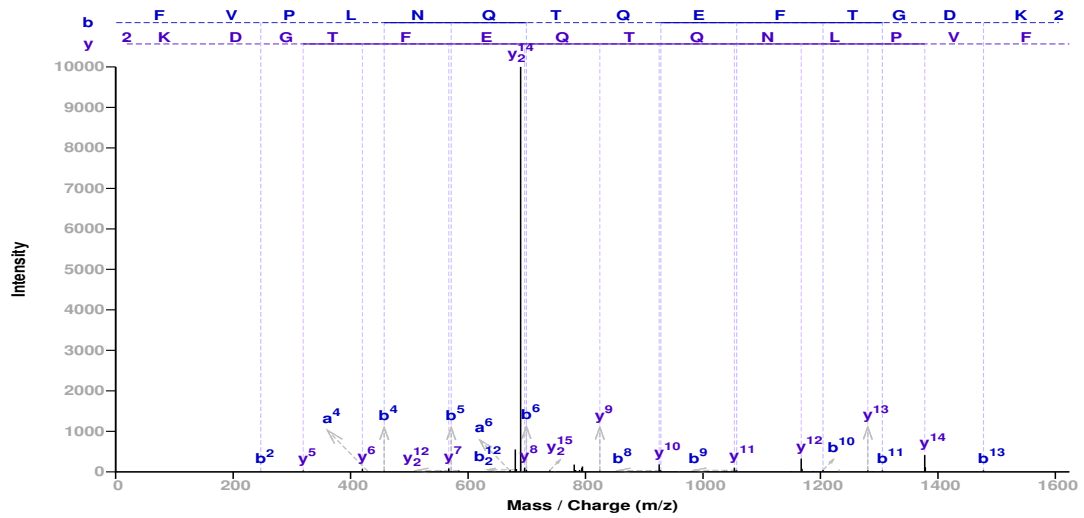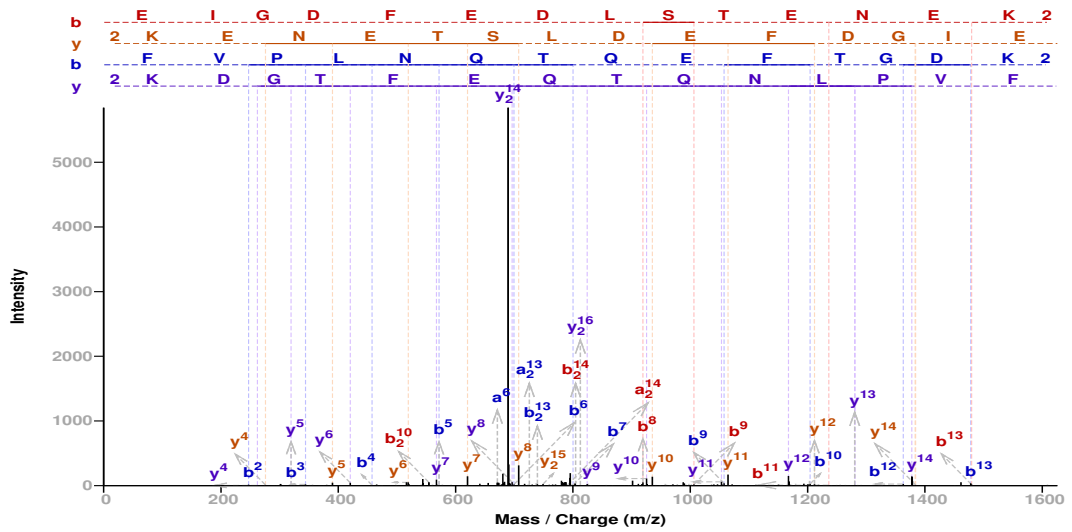



yeast1\_Scan\_Number\_2404 Precursor m/z: 446.733 cosine: 0.814  $\alpha$ : 0.996

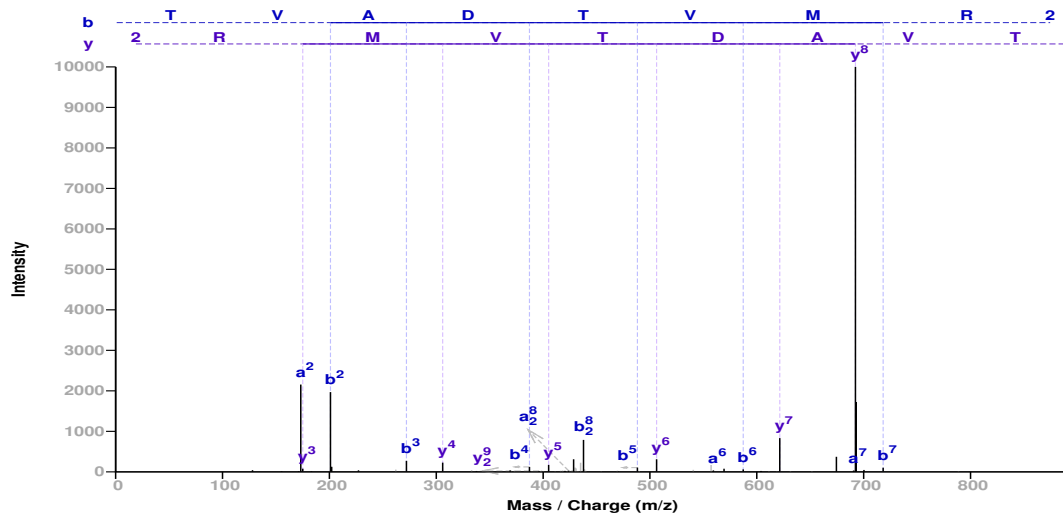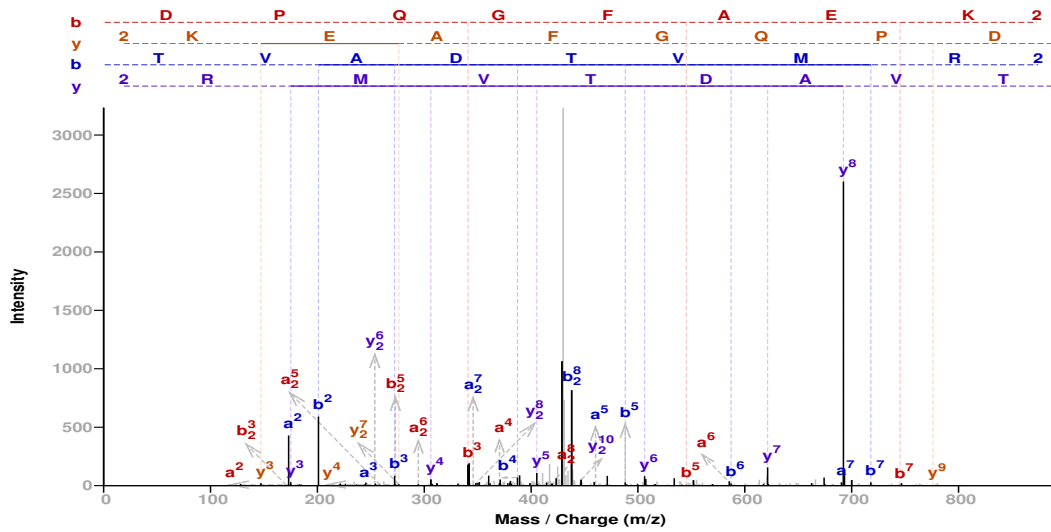

yeast1\_Scan\_Number\_1966 Precursor m/z: 417.758 cosine: 0.795  $\alpha$ : 0.991

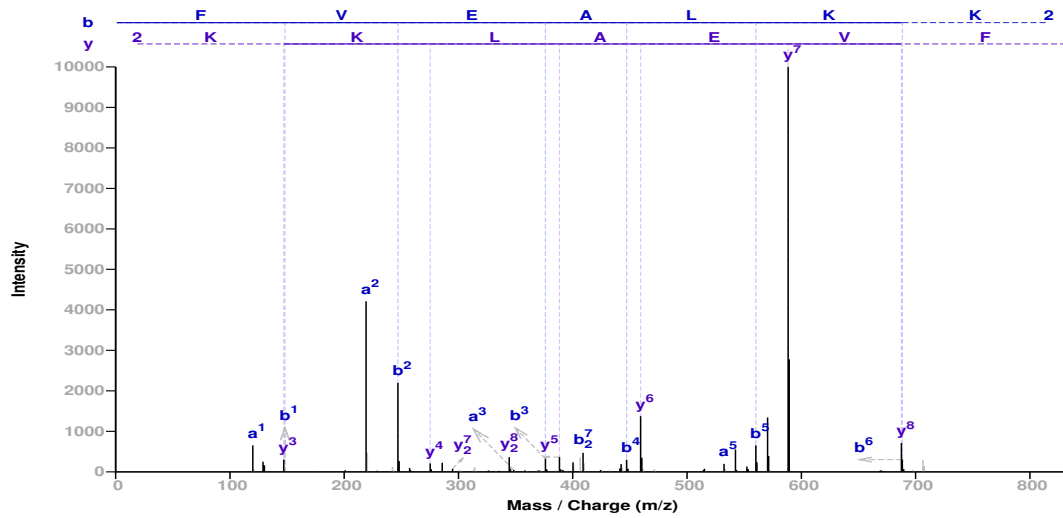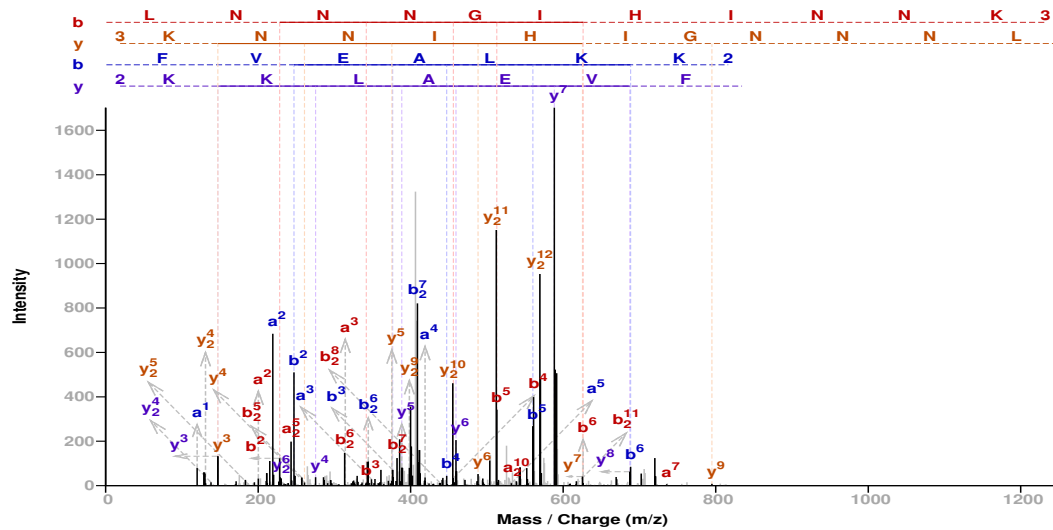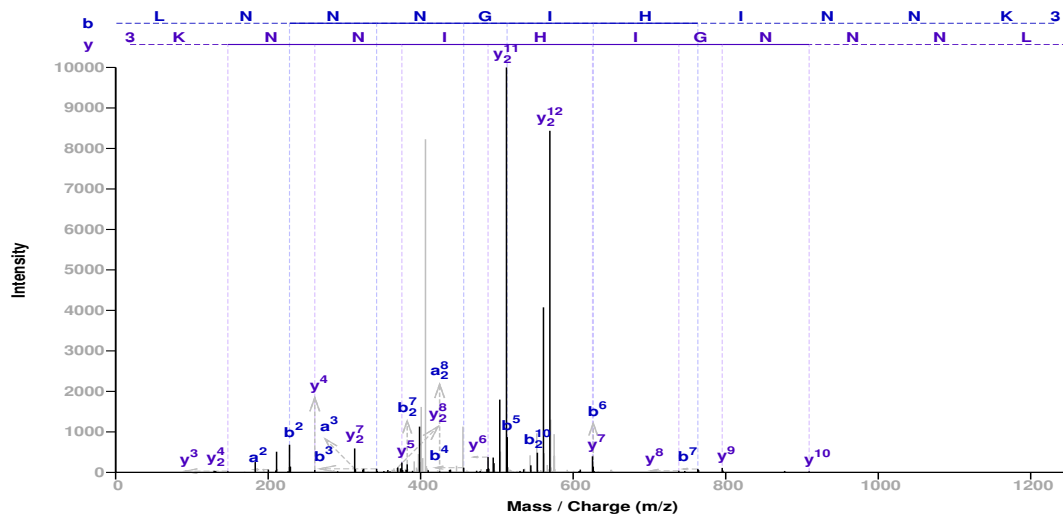

yeast1\_Scan\_Number\_3563 Precursor m/z: 468.745 cosine: 0.827  $\alpha$ : 0.973

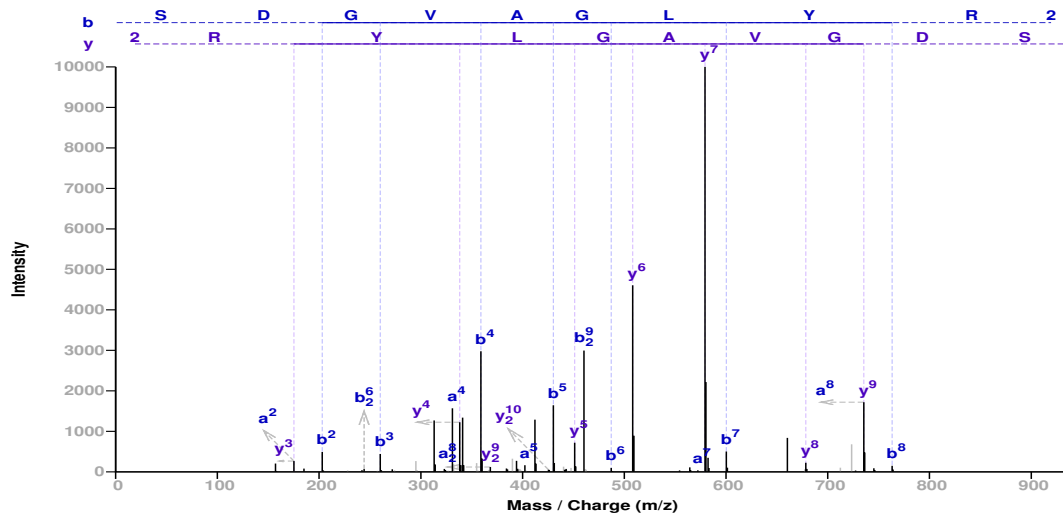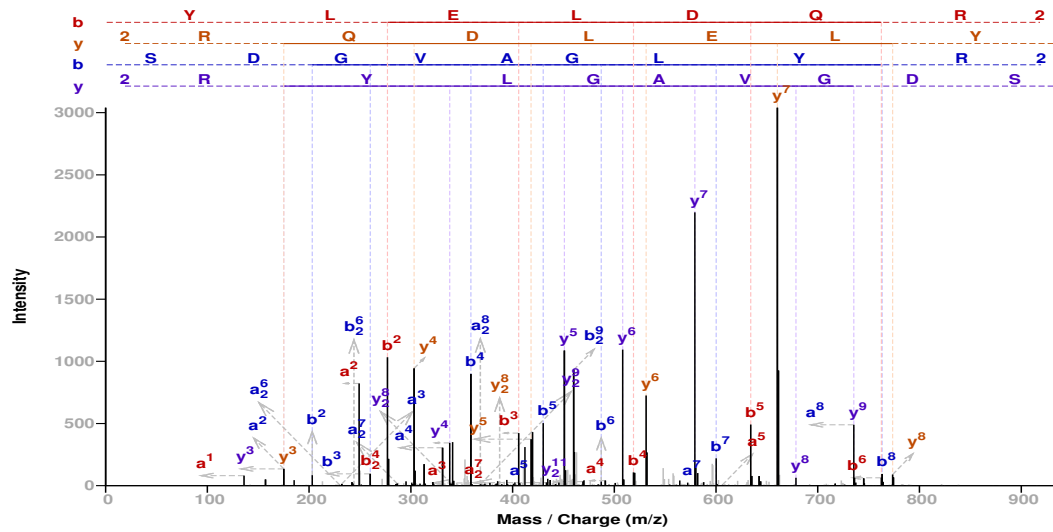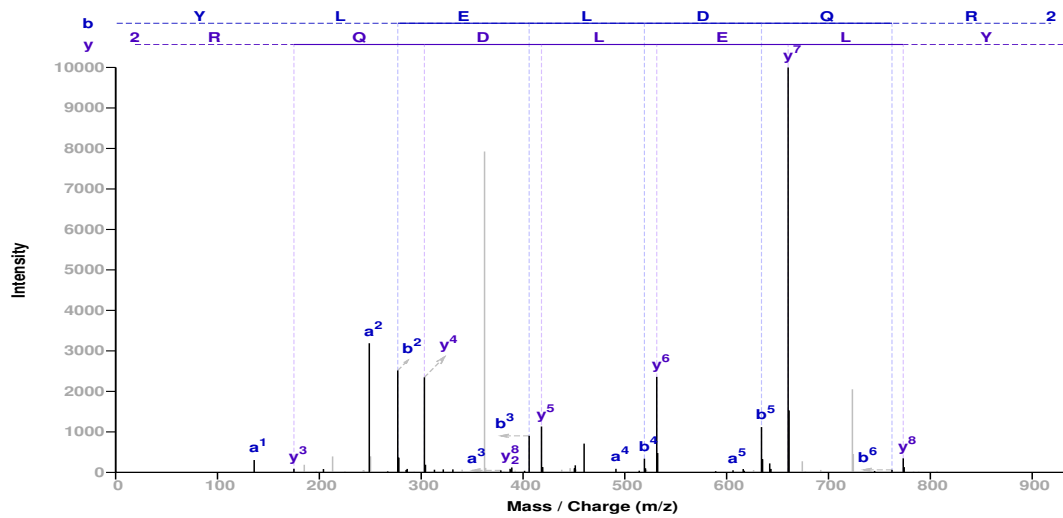



yeast1\_Scan\_Number\_6979 Precursor m/z: 593.334 cosine: 0.891  $\alpha$ : 0.954

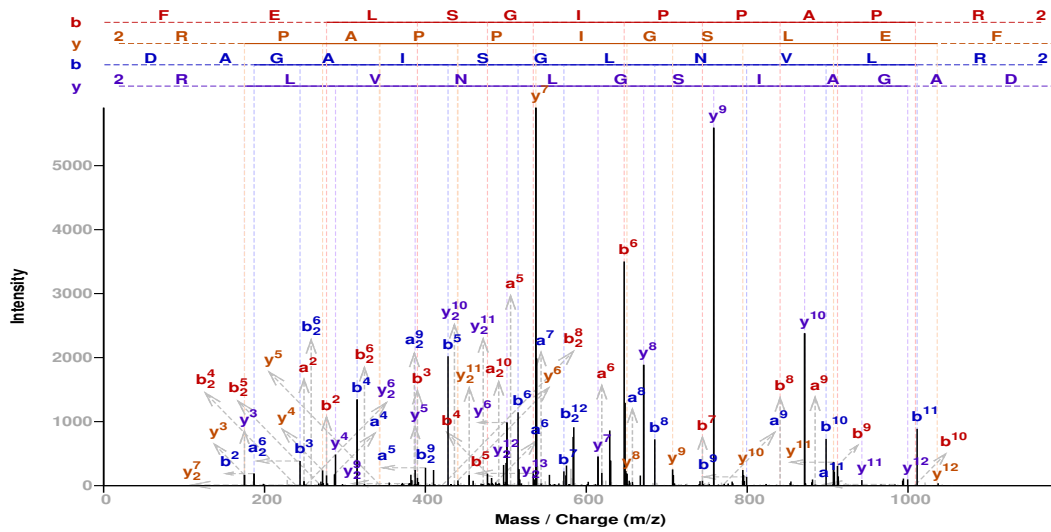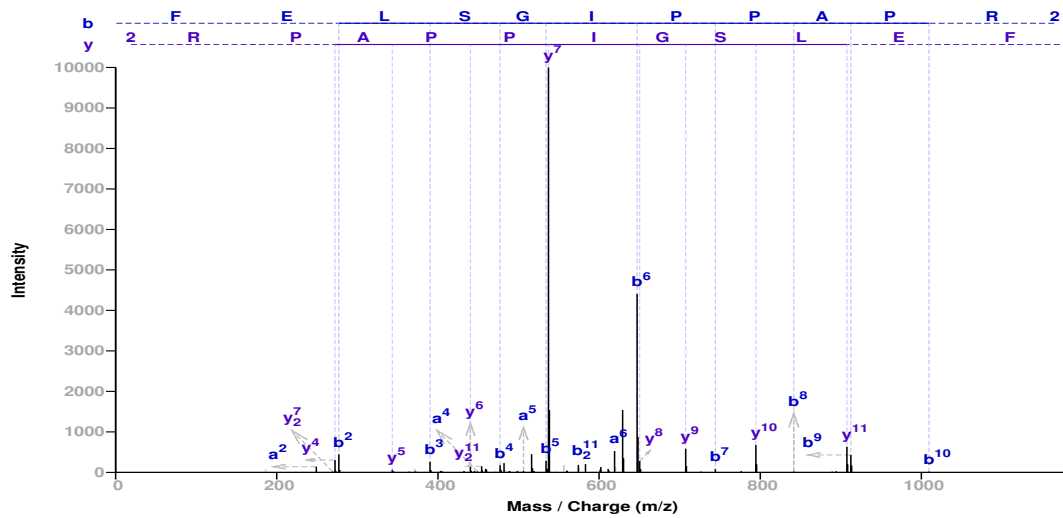



yeast1\_Scan\_Number\_5589 Precursor m/z: 471.288 cosine: 0.902  $\alpha$ : 0.950

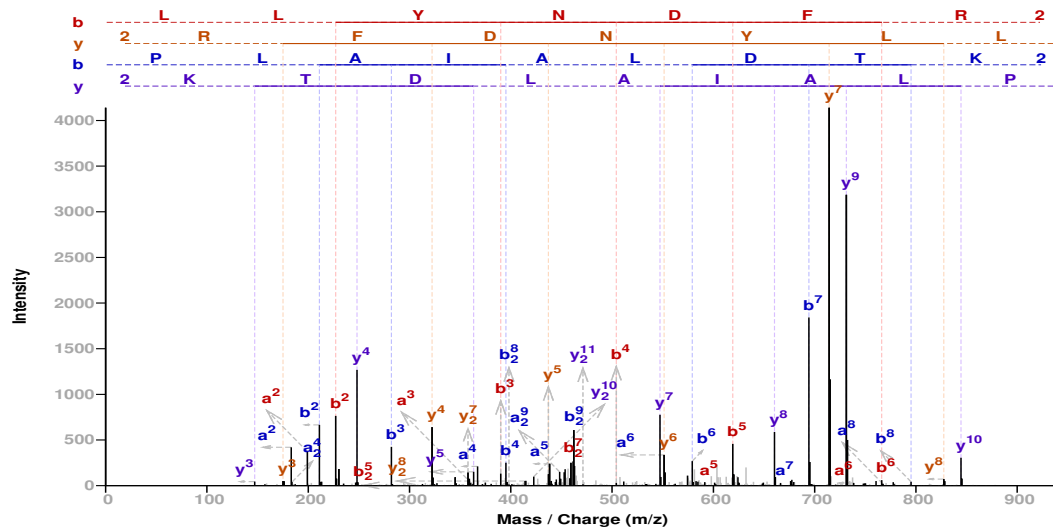

yeast1\_Scan\_Number\_2921 Precursor m/z: 622.807 cosine: 0.757  $\alpha$ : 0.943

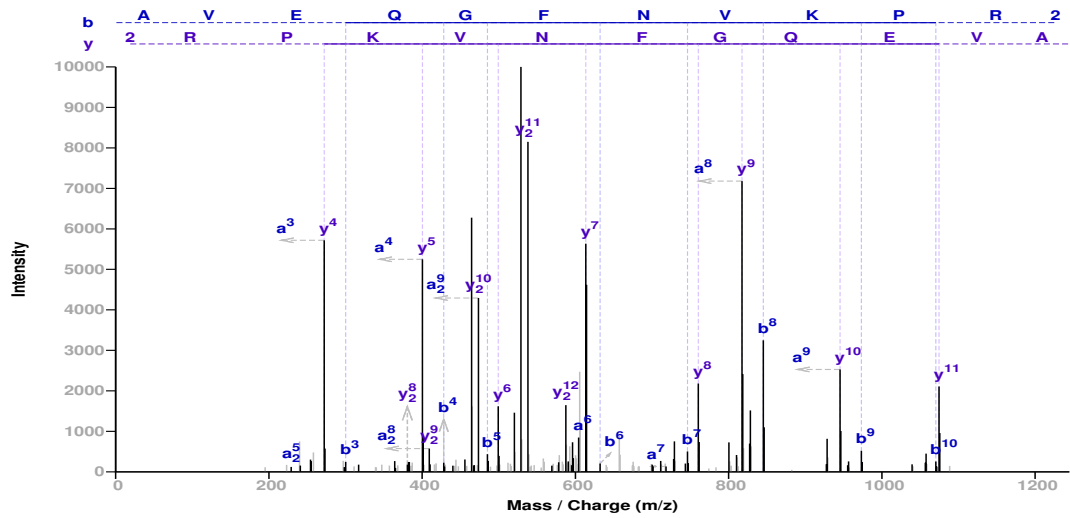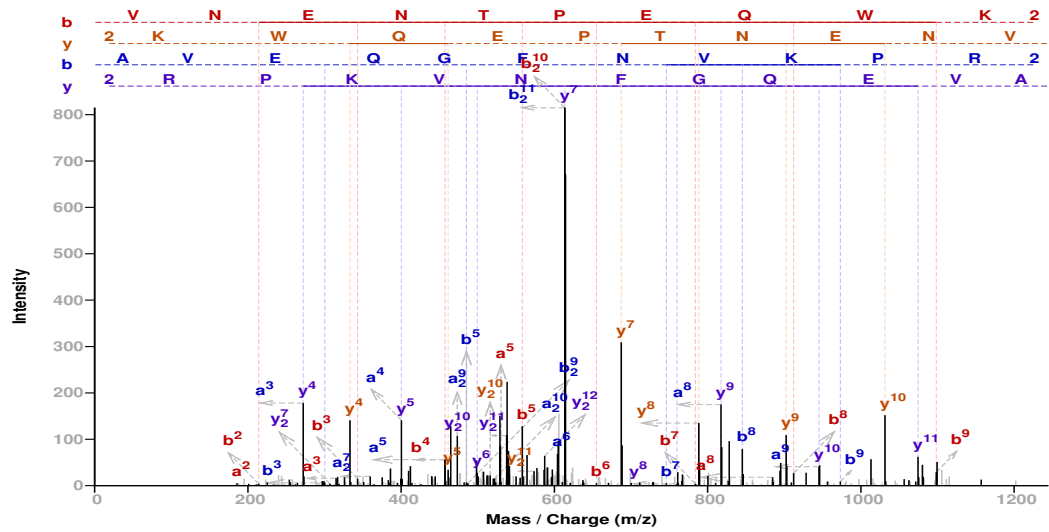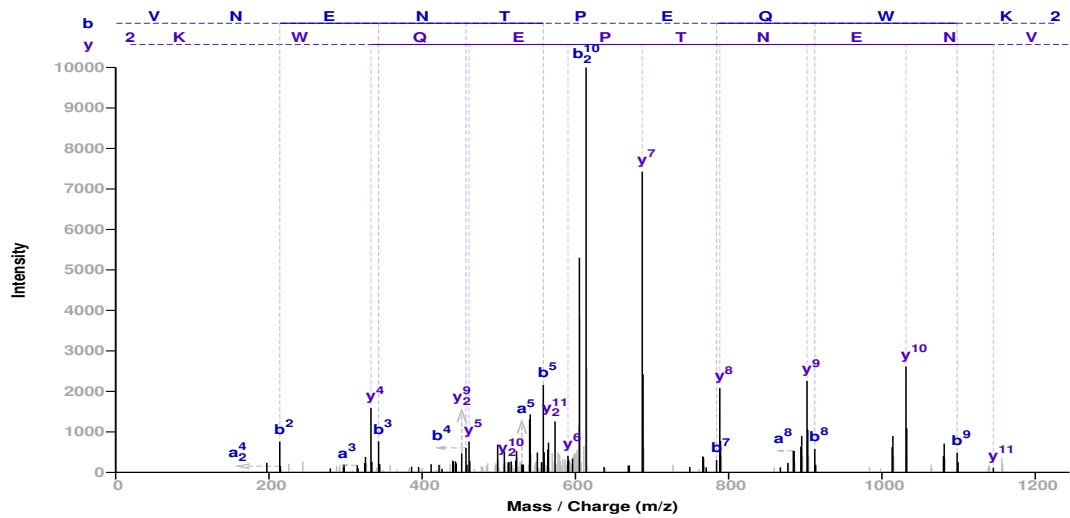

yeast1\_Scan\_Number\_1703 Precursor m/z: 467.741 cosine: 0.931  $\alpha$ : 0.931

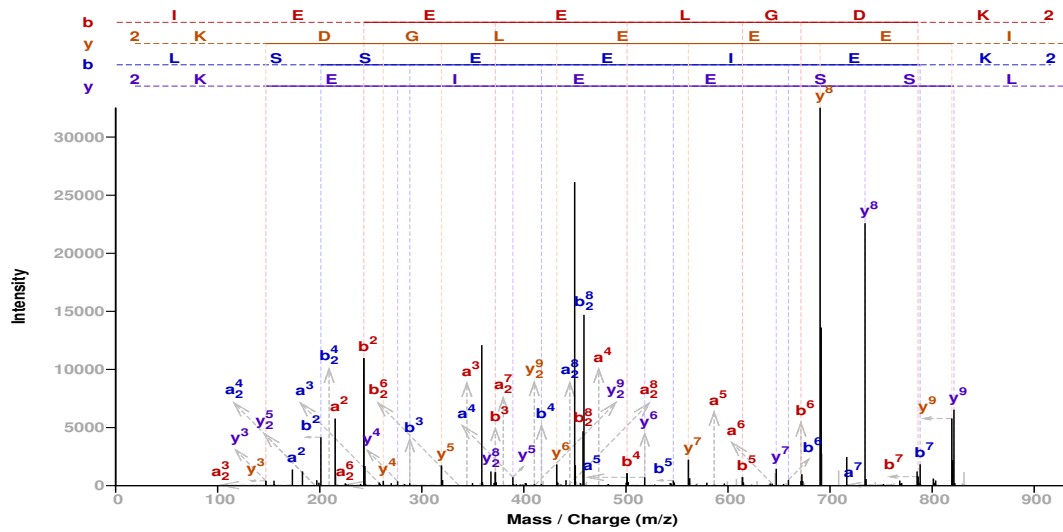

yeast1\_Scan\_Number\_2743 Precursor m/z: 518.767 cosine: 0.768  $\alpha$ : 0.908

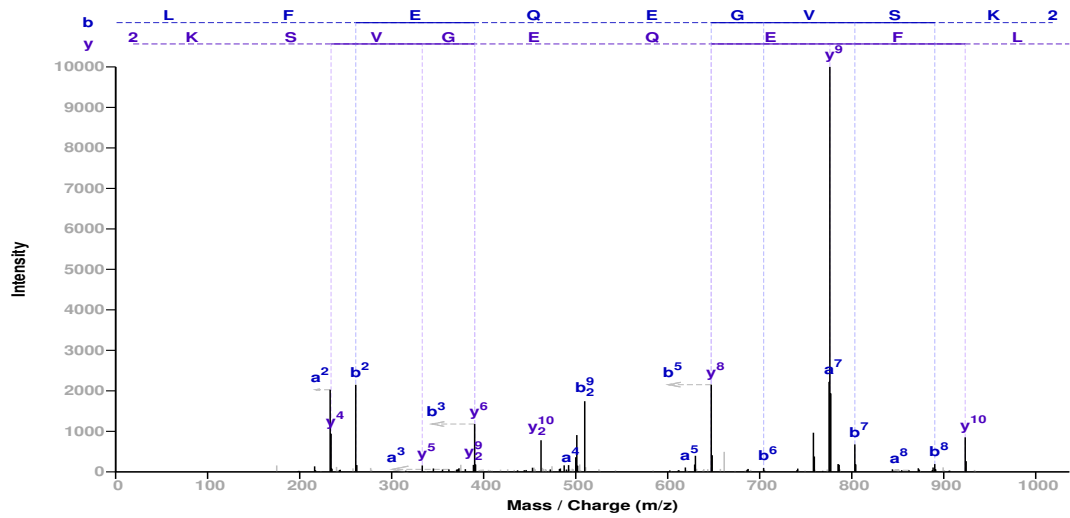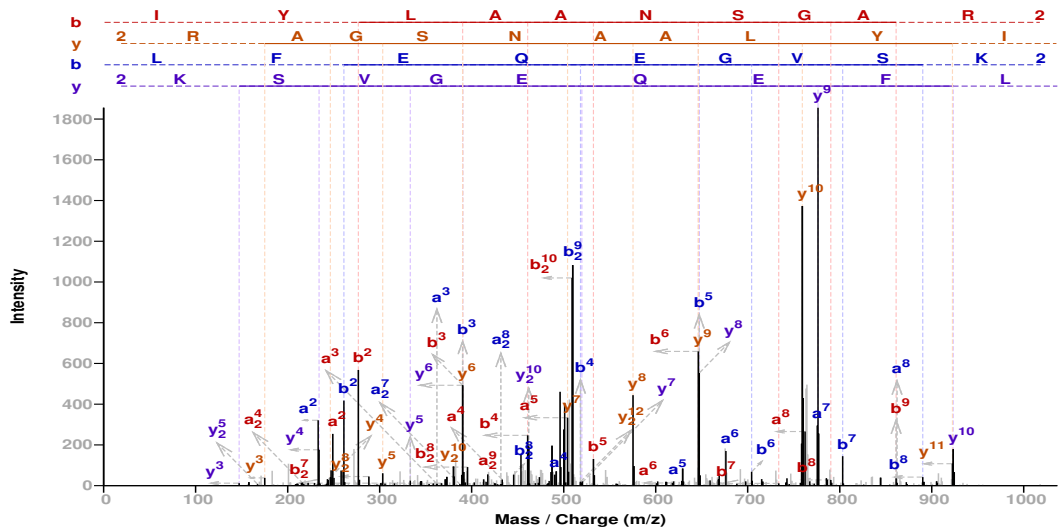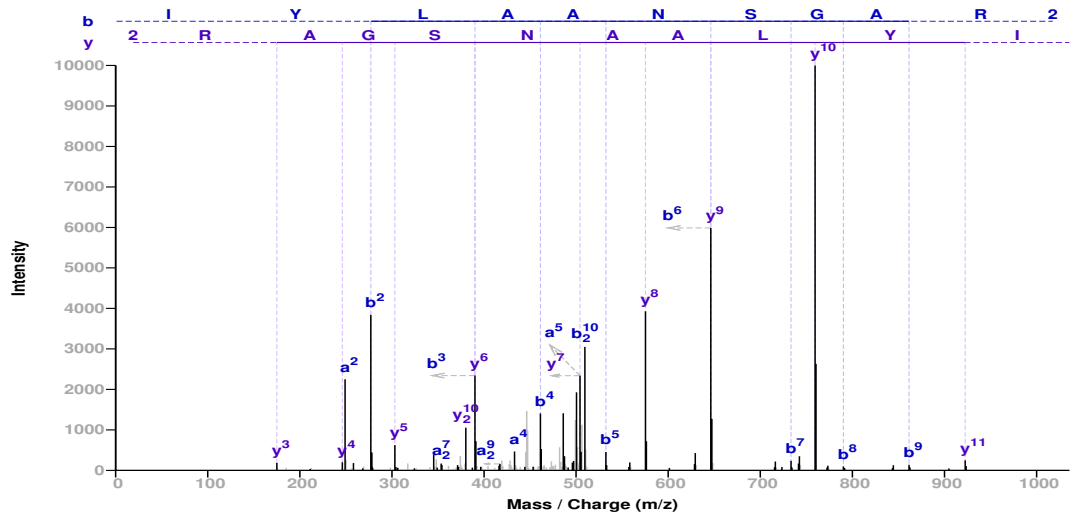

yeast1\_Scan\_Number\_3989 Precursor m/z: 442.265 cosine: 0.795  $\alpha$ : 0.906

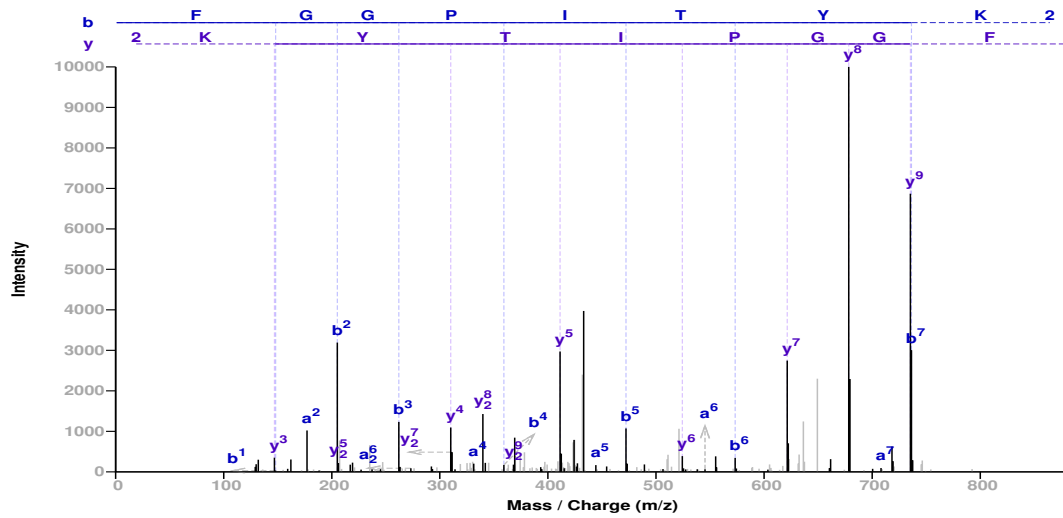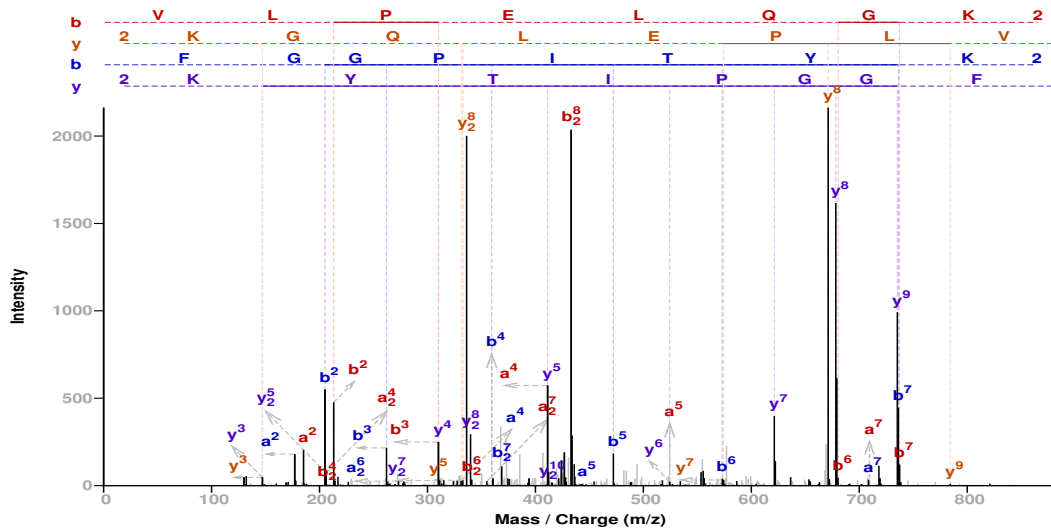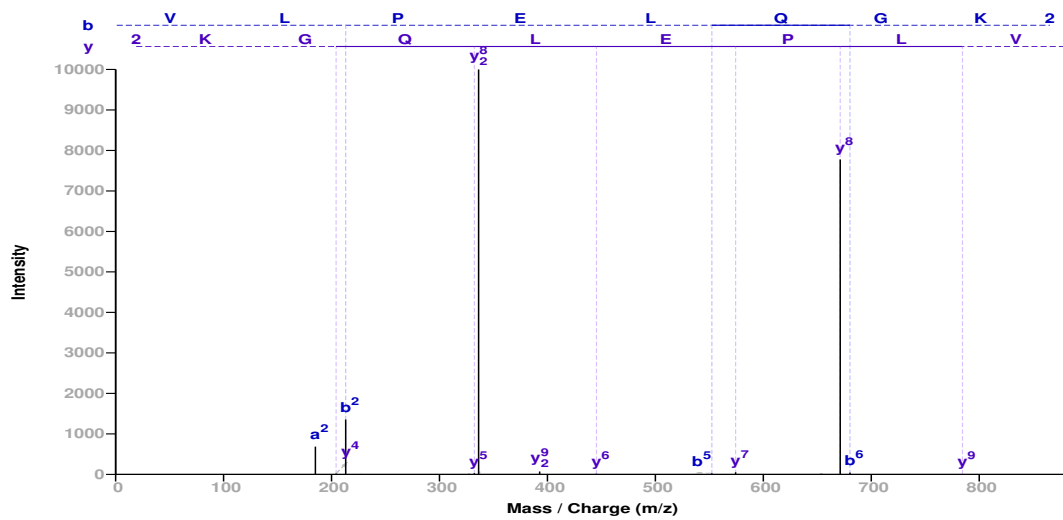

yeast1\_Scan\_Number\_2993 Precursor m/z: 349.235 cosine: 0.750  $\alpha$ : 0.901

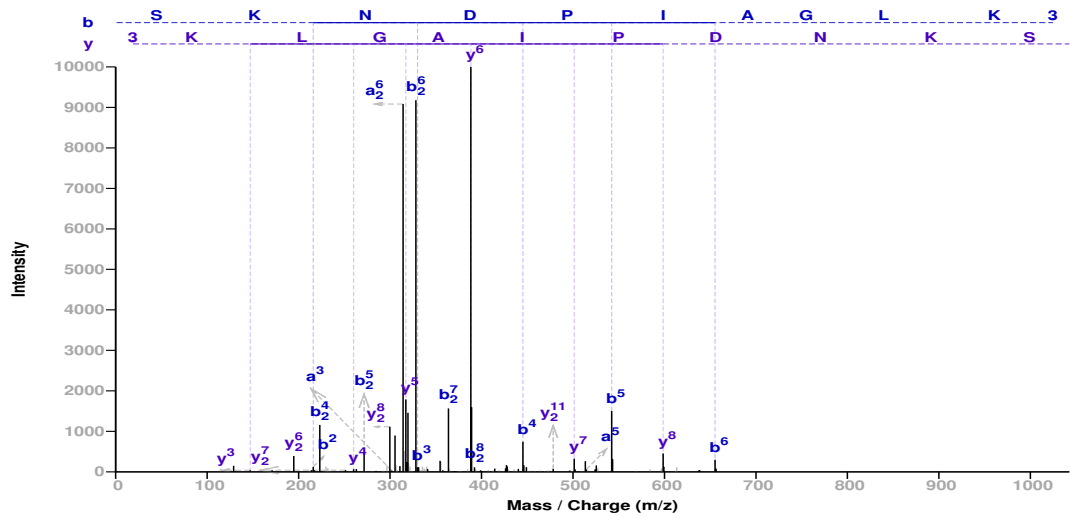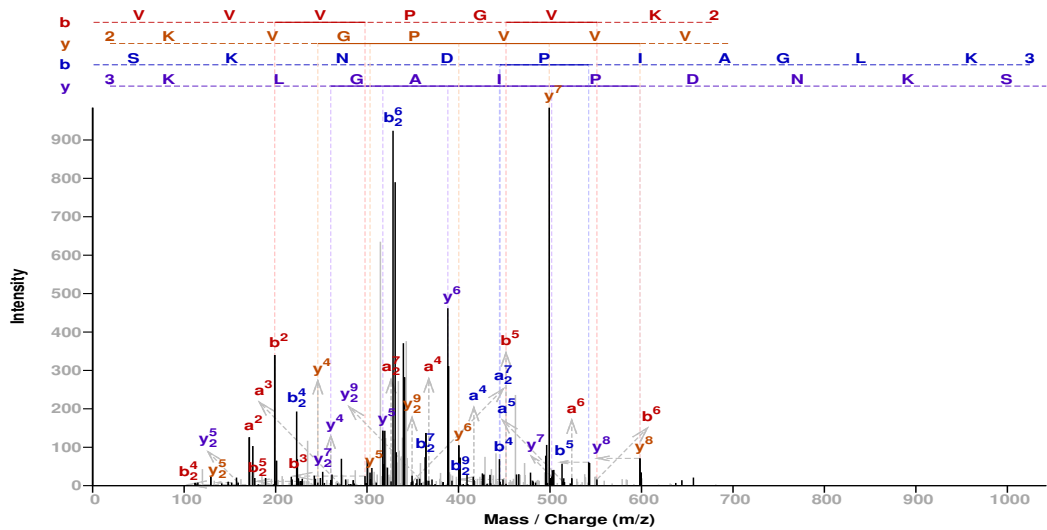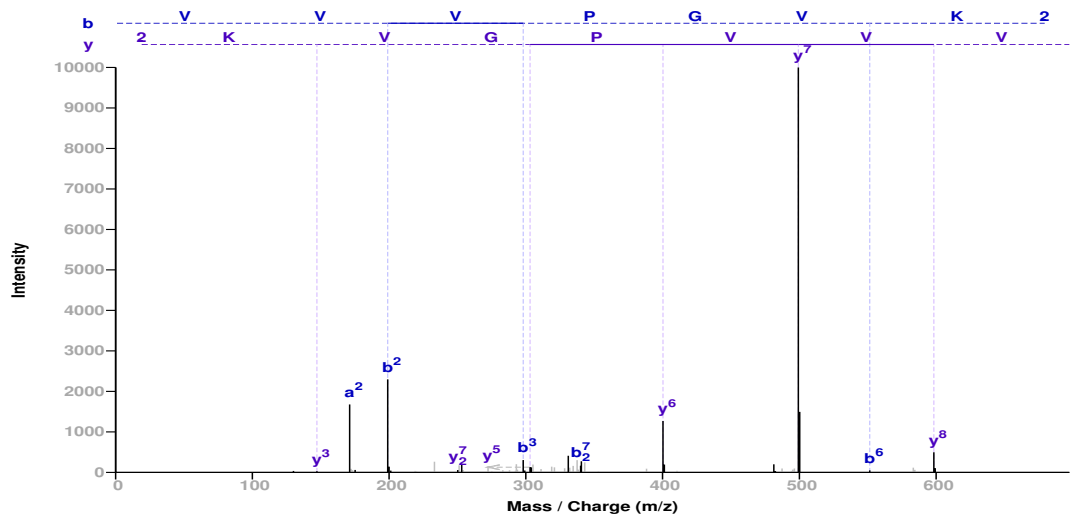

yeast1\_Scan\_Number\_7921 Precursor m/z: 530.814 cosine: 0.762  $\alpha$ : 0.892

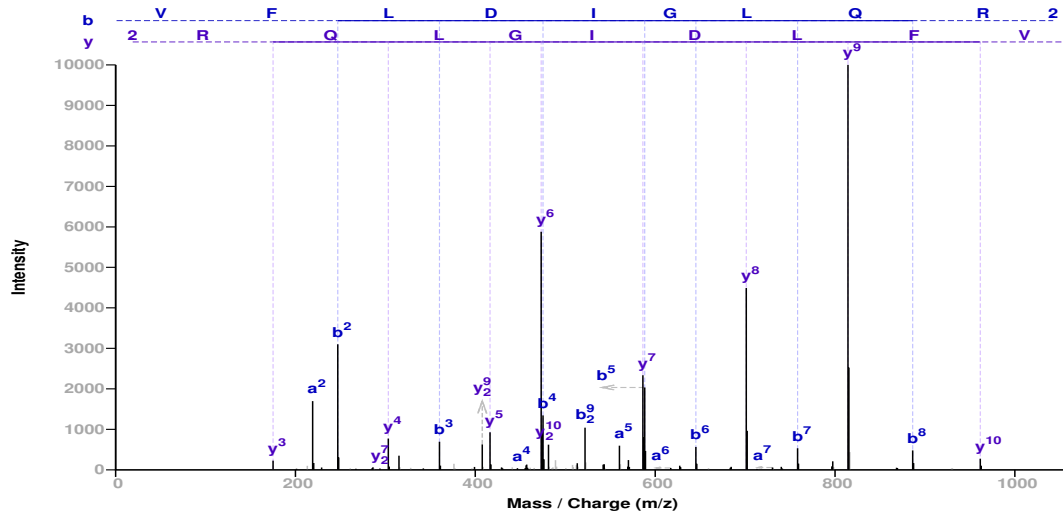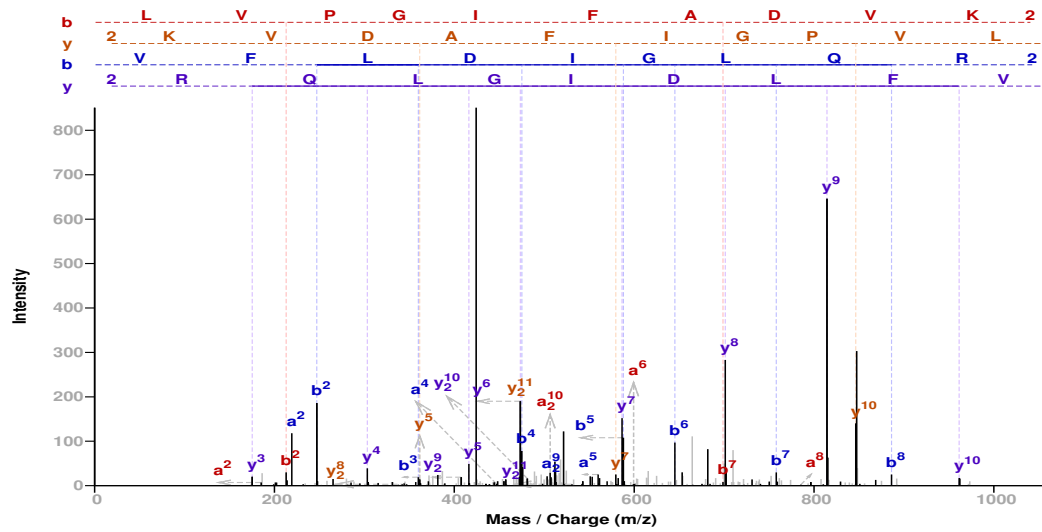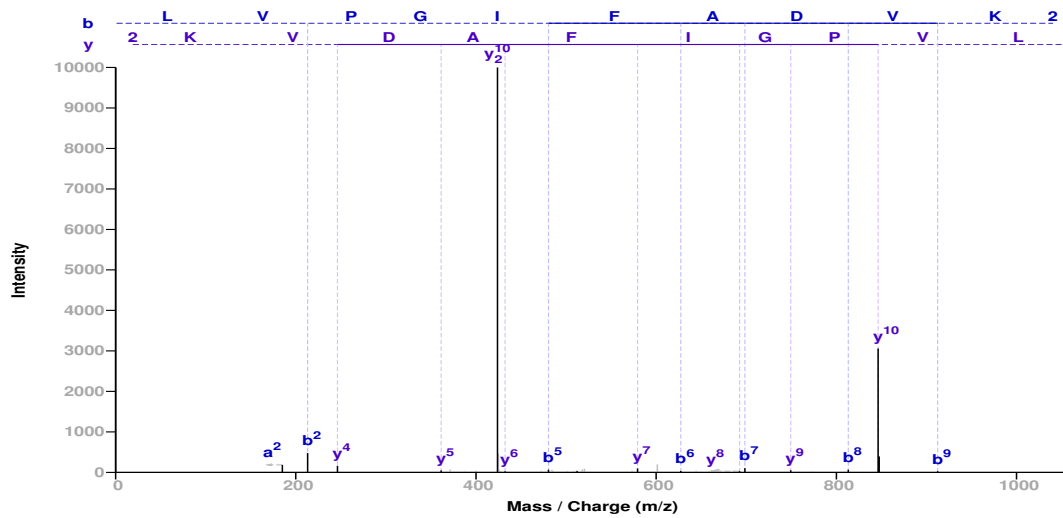

yeast1\_Scan\_Number\_1723 Precursor m/z: 458.559 cosine: 0.748  $\alpha$ : 0.891

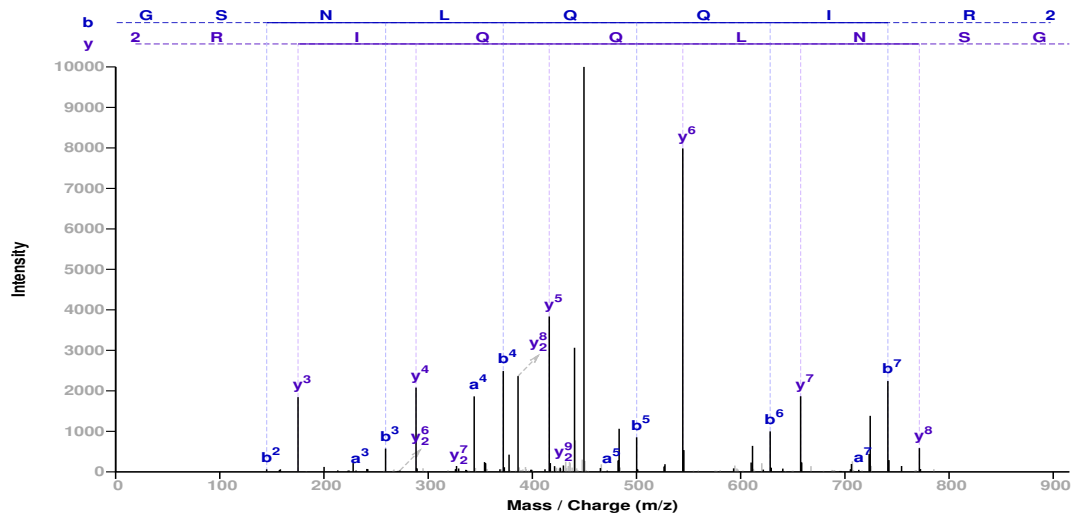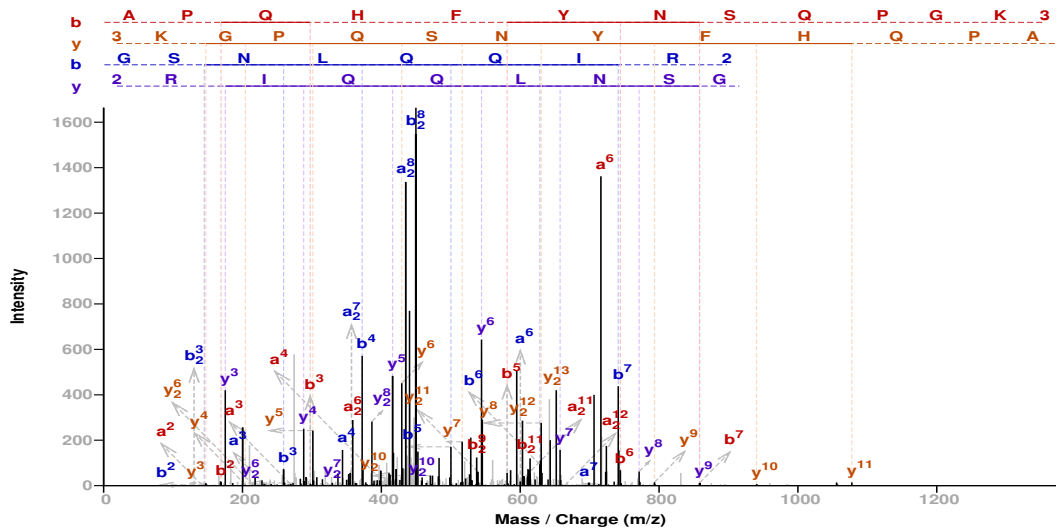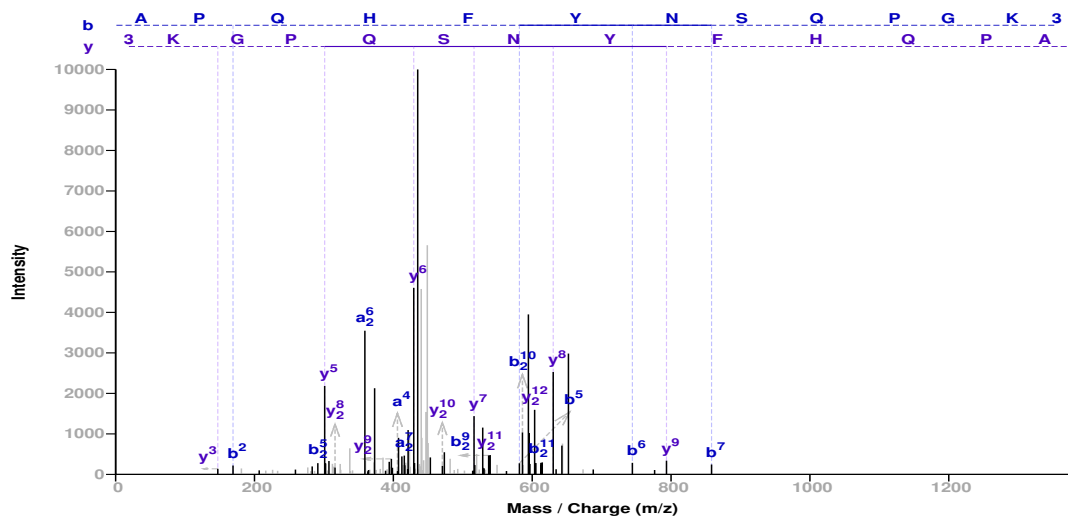





yeast1\_Scan\_Number\_4335 Precursor m/z: 485.993 cosine: 0.857  $\alpha$ : 0.869

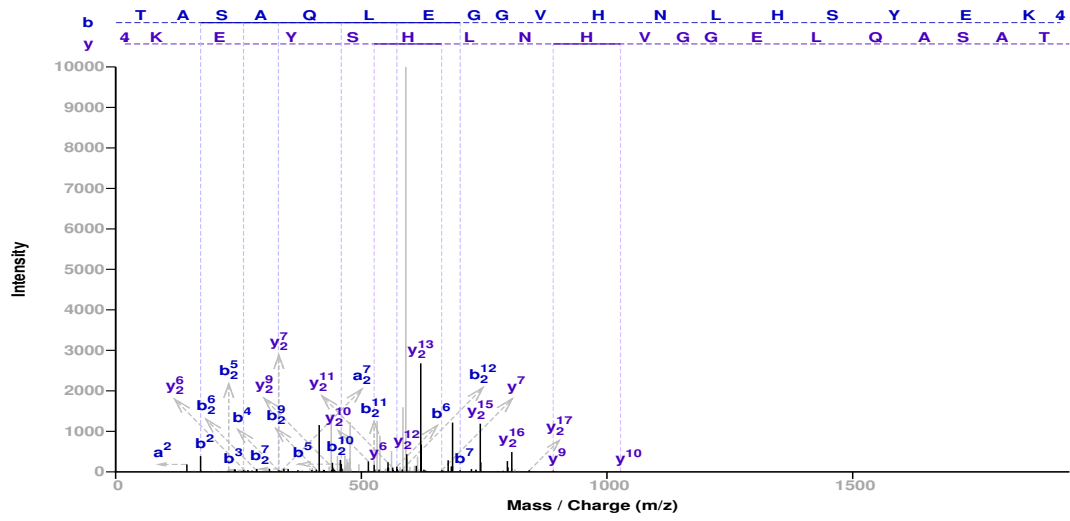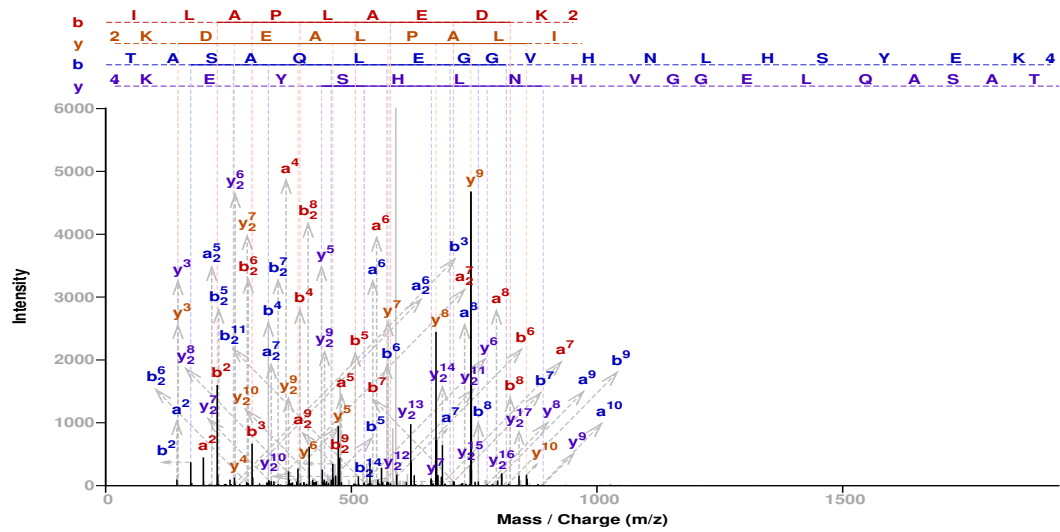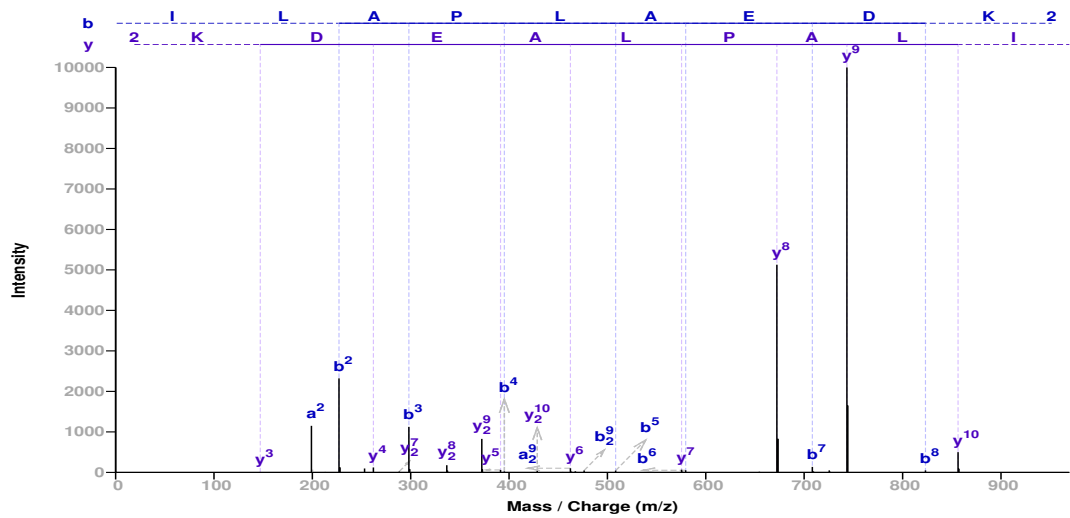

yeast1\_Scan\_Number\_2959 Precursor m/z: 422.205 cosine: 0.759  $\alpha$ : 0.857

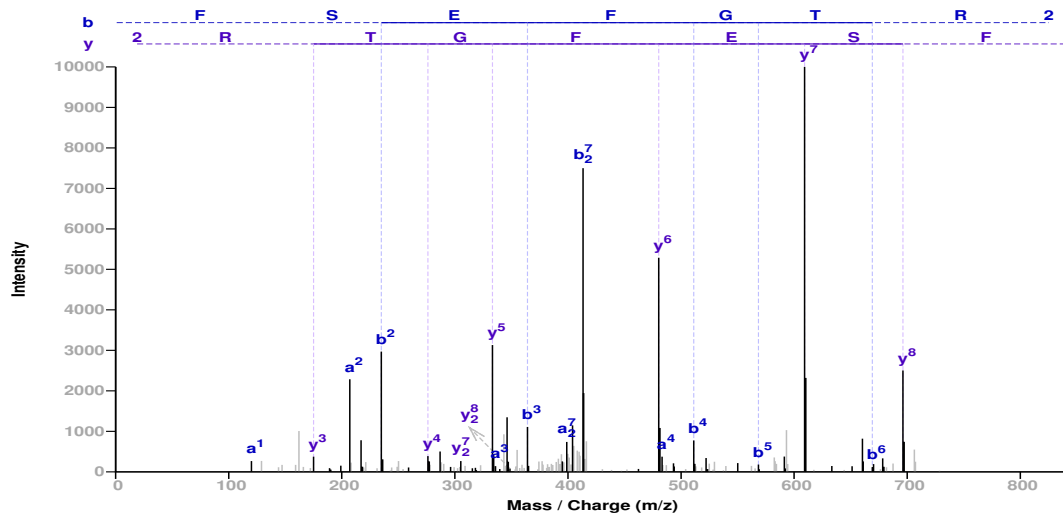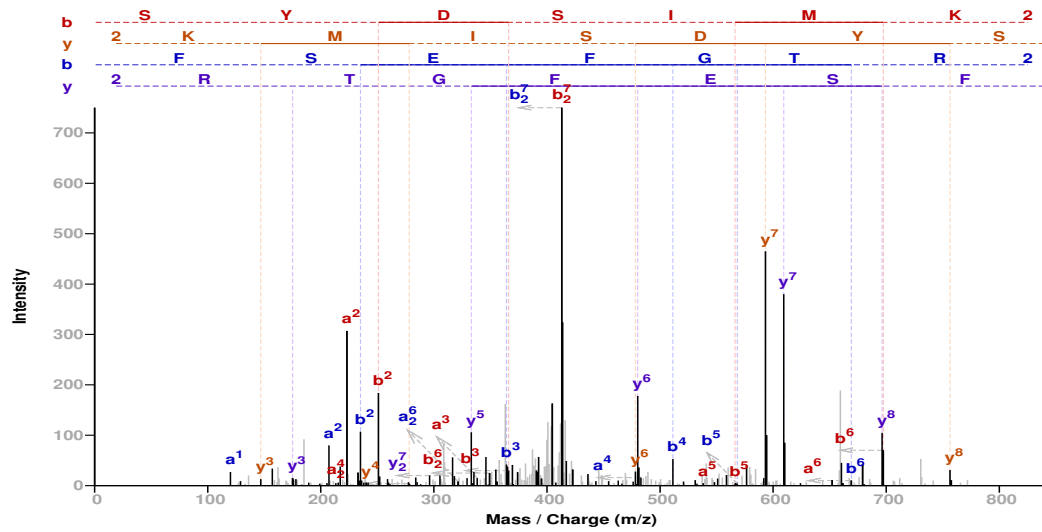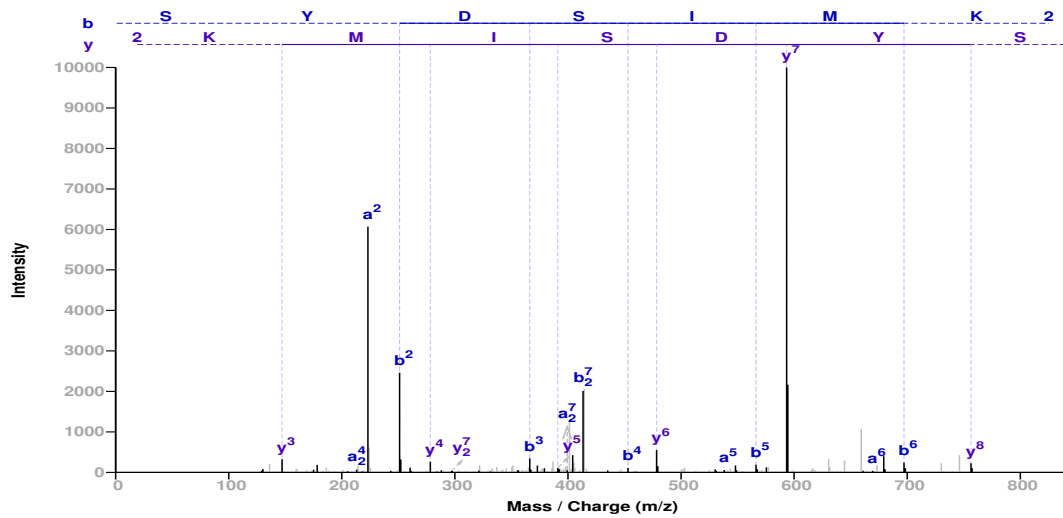



yeast1\_Scan\_Number.1891 Precursor m/z: 536.805 cosine: 0.769  $\alpha$ : 0.852

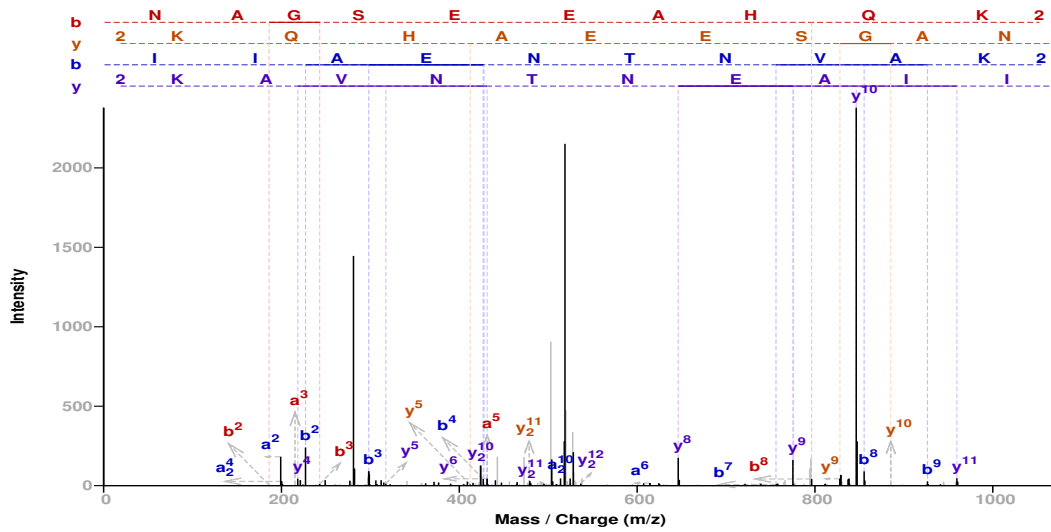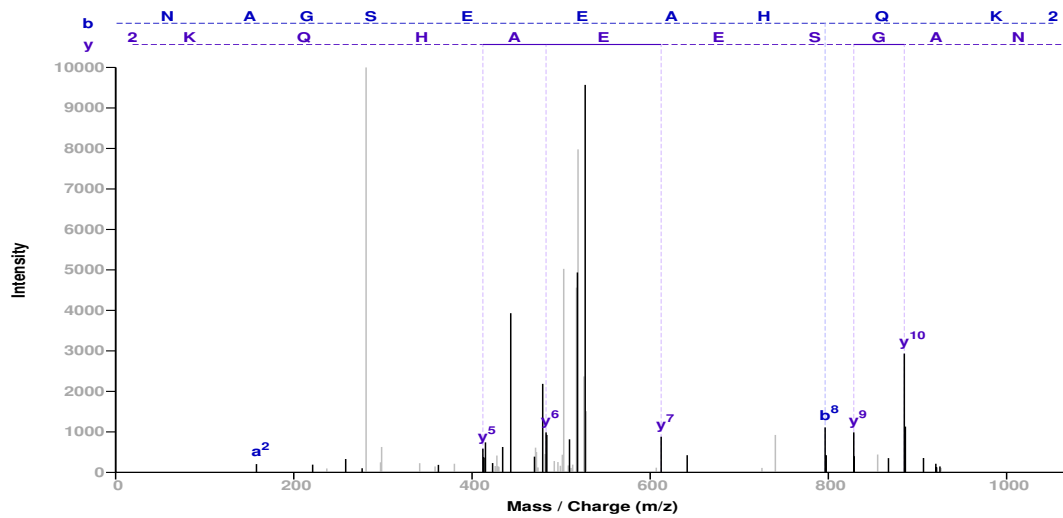

yeast1\_Scan\_Number\_4091 Precursor m/z: 406.226 cosine: 0.808  $\alpha$ : 0.839

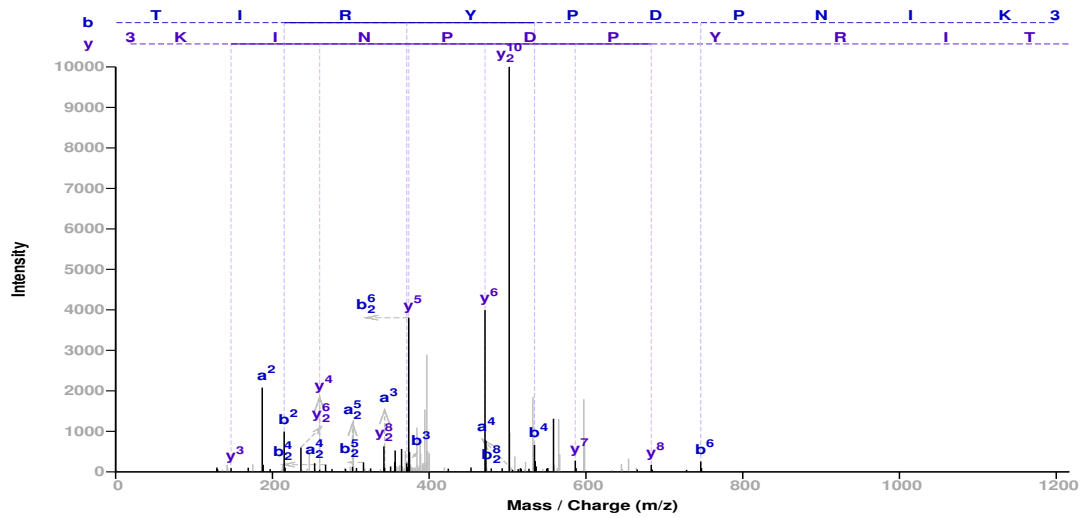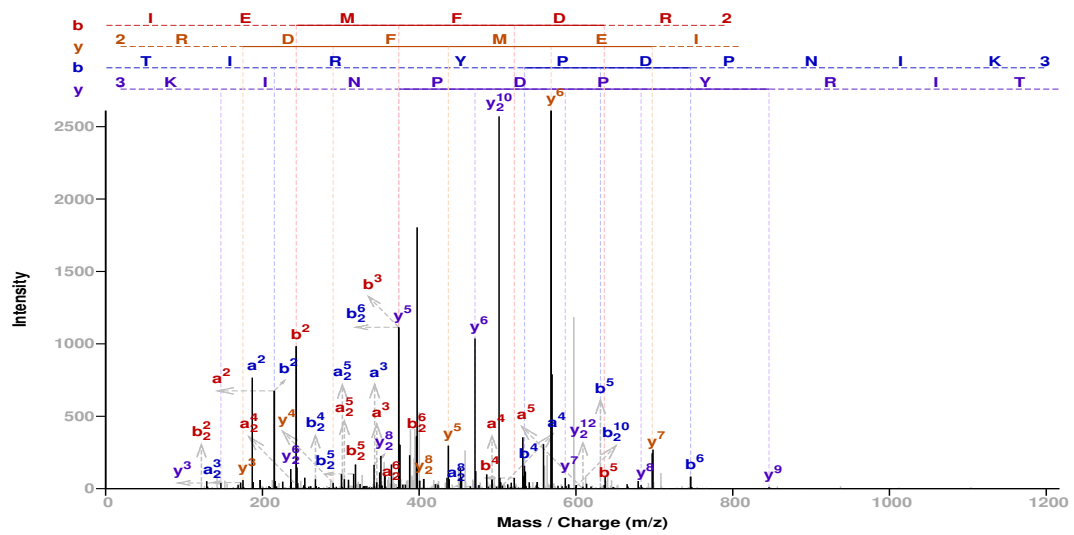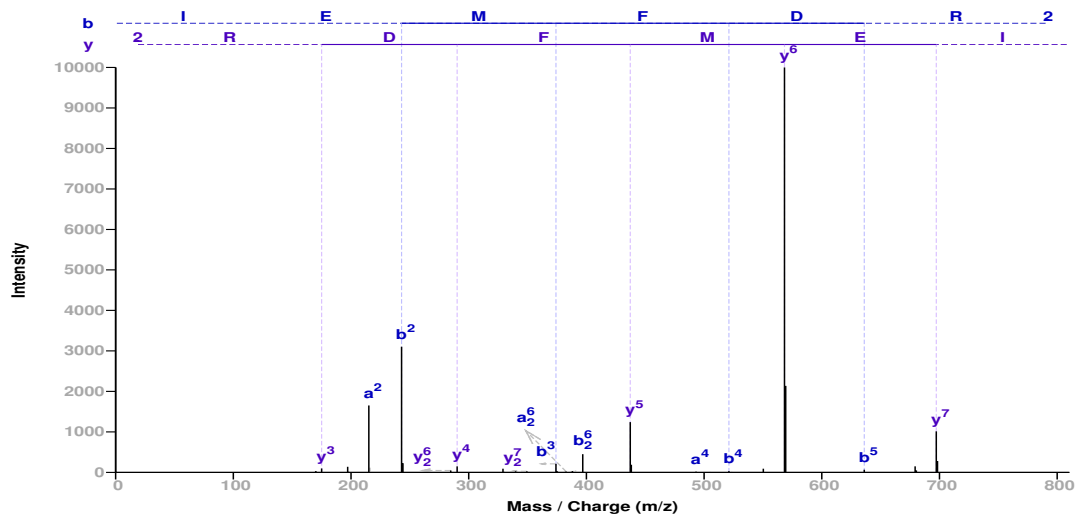

yeast1\_Scan\_Number\_4700 Precursor m/z: 650.839 cosine: 0.821  $\alpha$ : 0.834

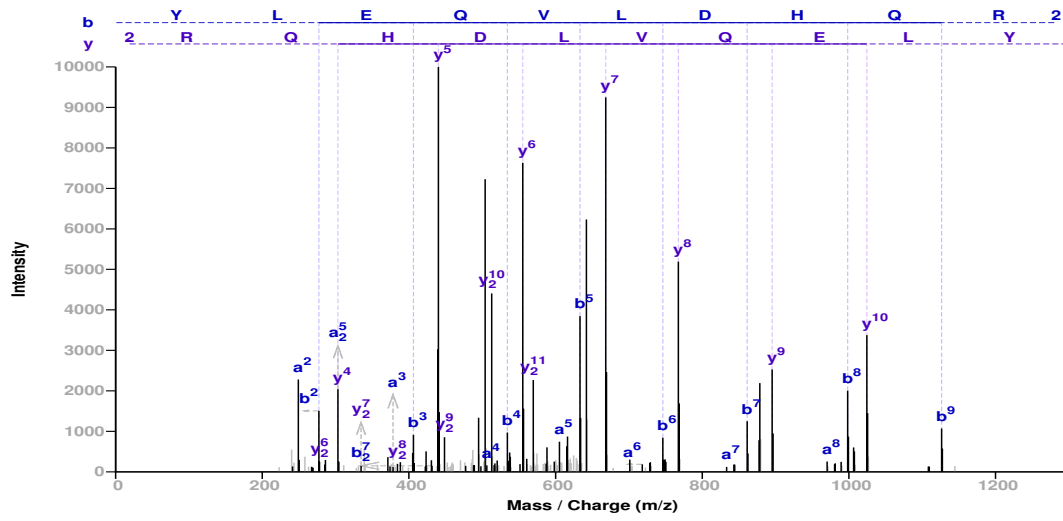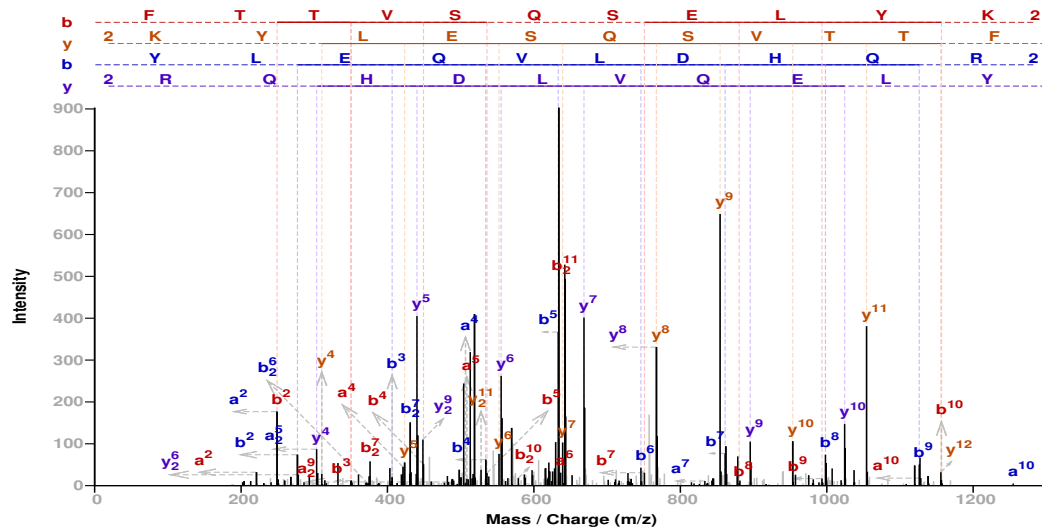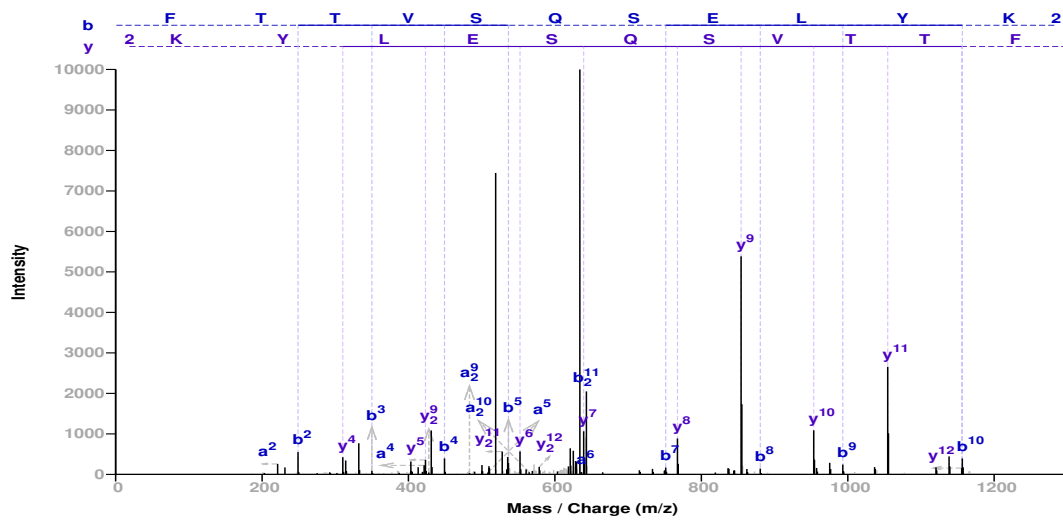

yeast1\_Scan\_Number\_5597 Precursor m/z: 613.309 cosine: 0.822  $\alpha$ : 0.832

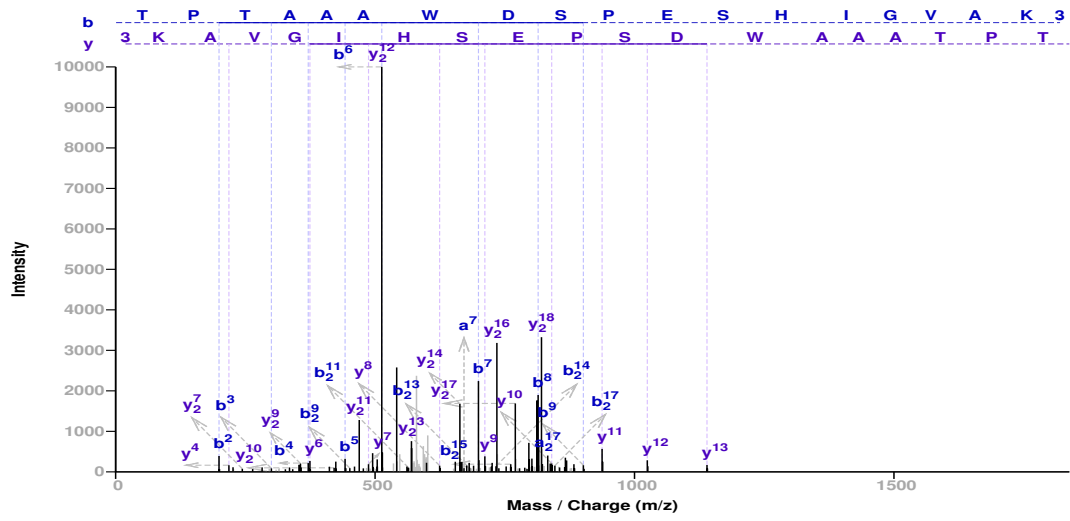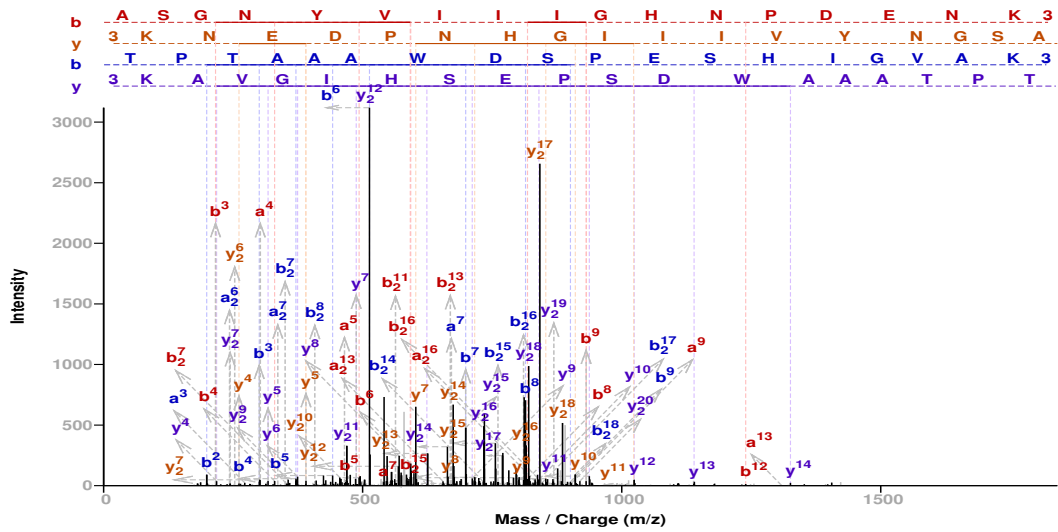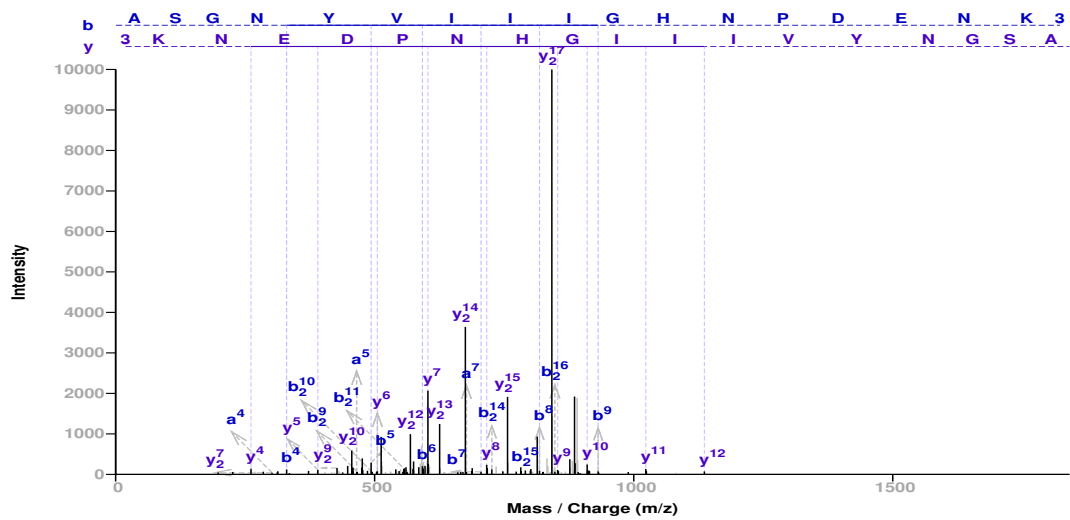



yeast1\_Scan\_Number\_1803 Precursor m/z: 415.268 cosine: 0.737  $\alpha$ : 0.824

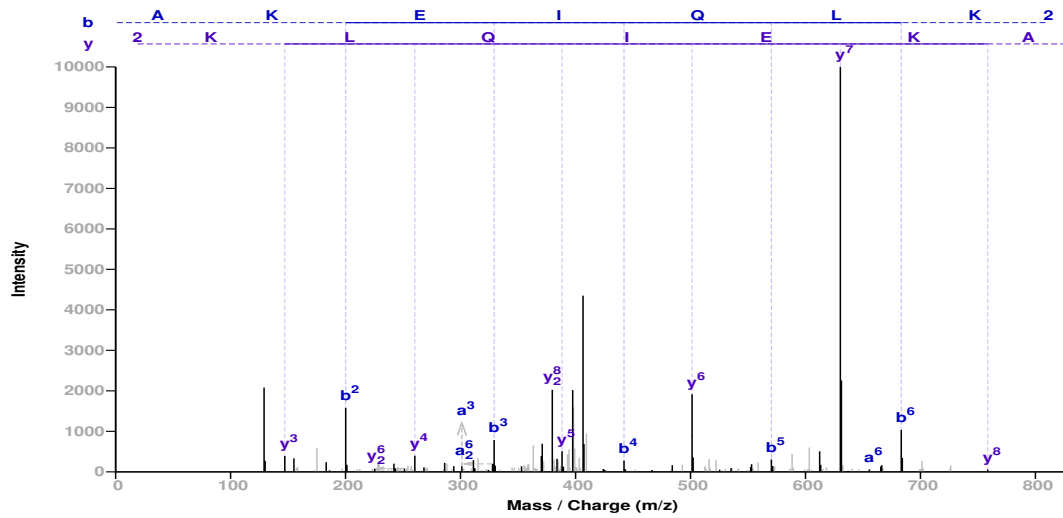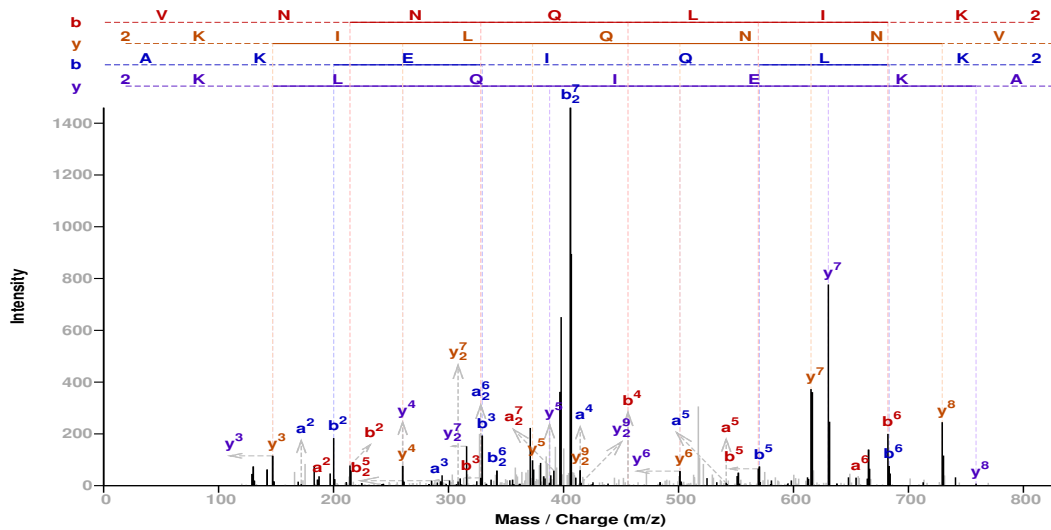

yeast1\_Scan\_Number\_5582 Precursor m/z: 468.593 cosine: 0.806  $\alpha$ : 0.803

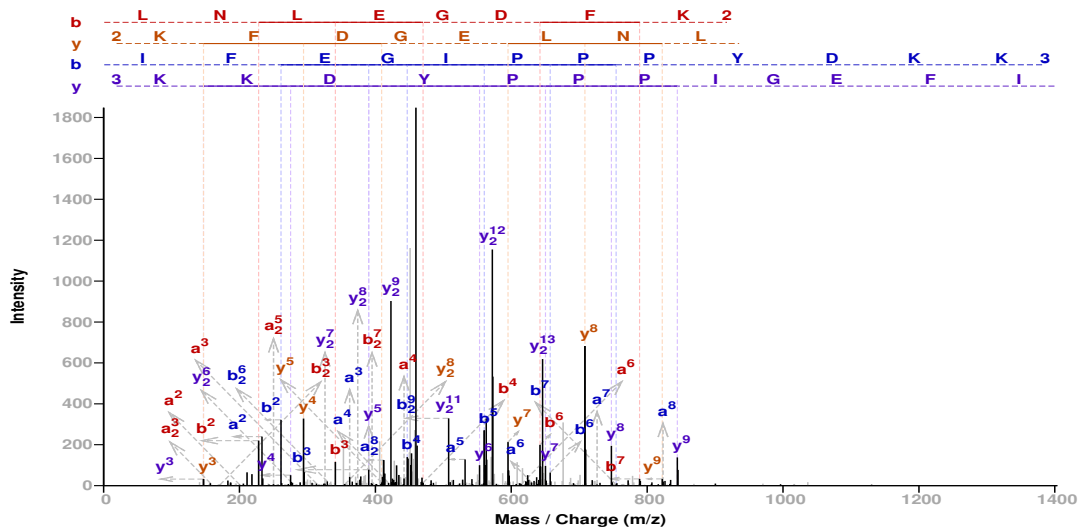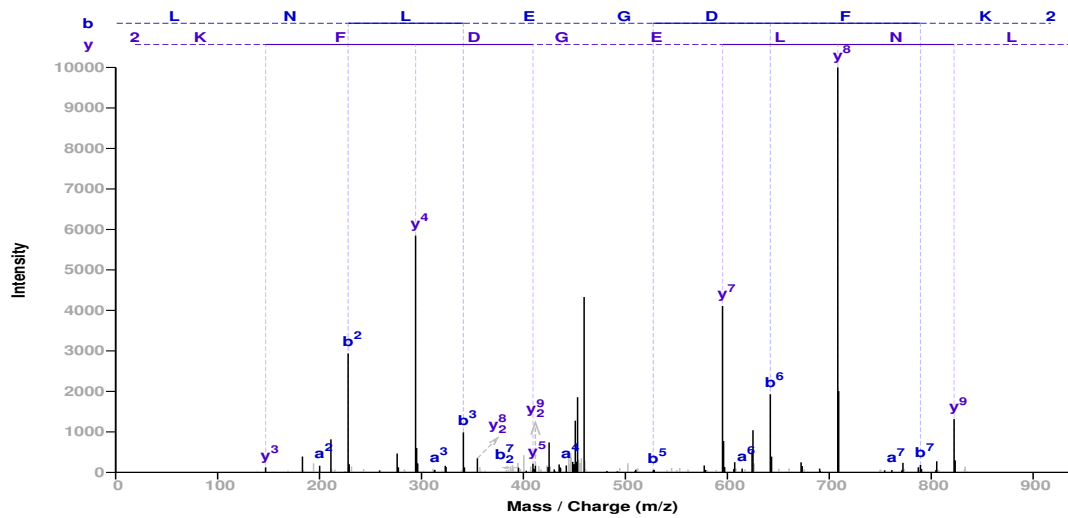

yeast1\_Scan\_Number\_3155 Precursor m/z: 452.741 cosine: 0.875  $\alpha$ : 0.778

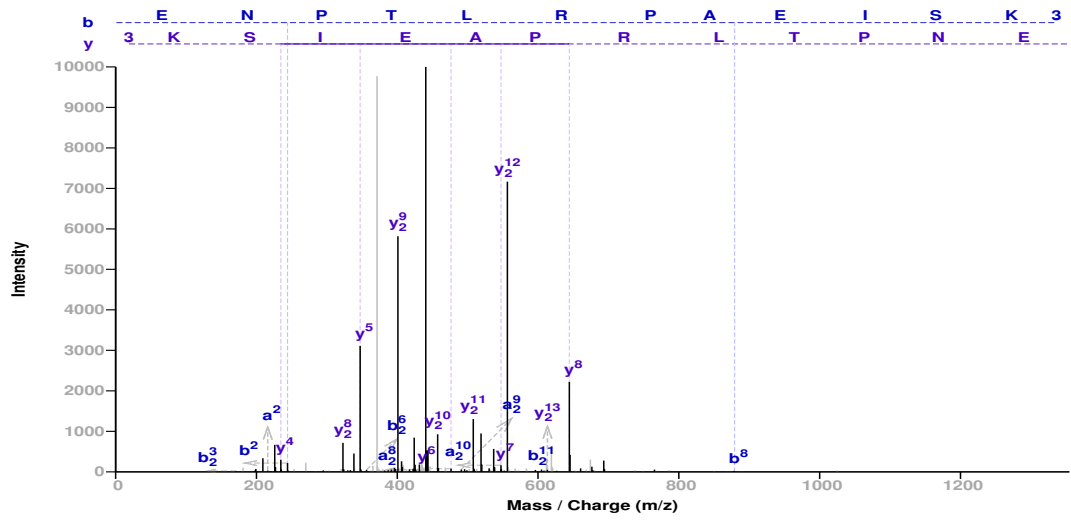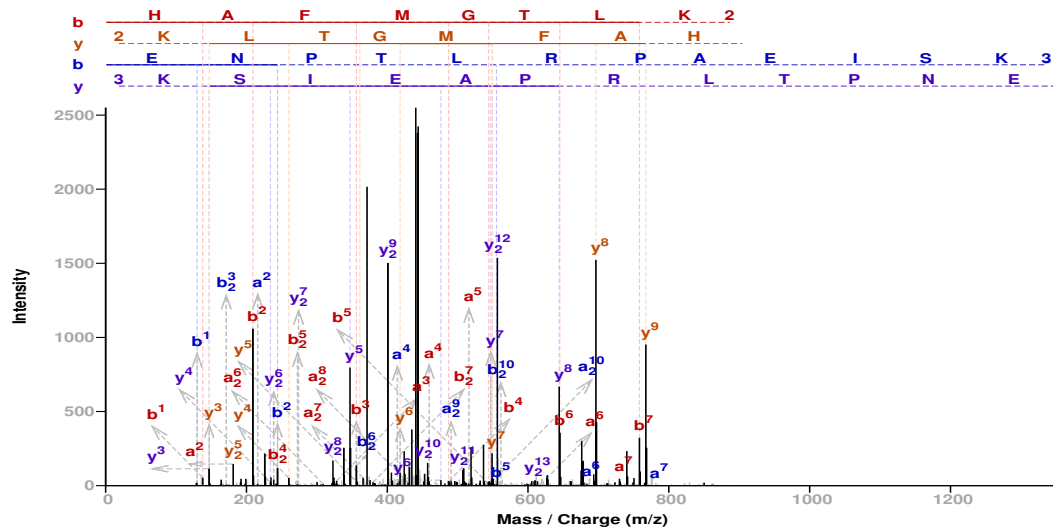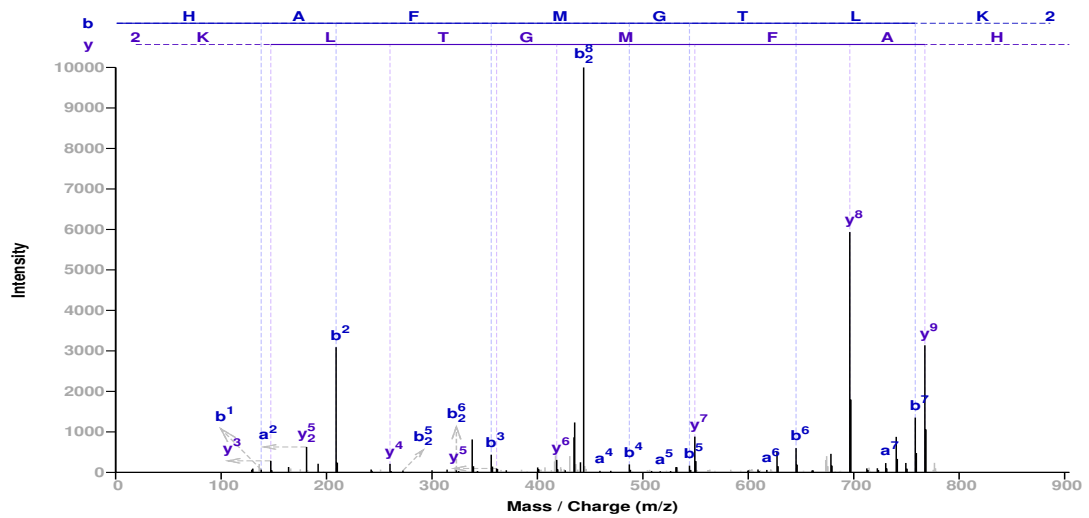

yeast1\_Scan\_Number\_4157 Precursor m/z: 485.790 cosine: 0.746  $\alpha$ : 0.775

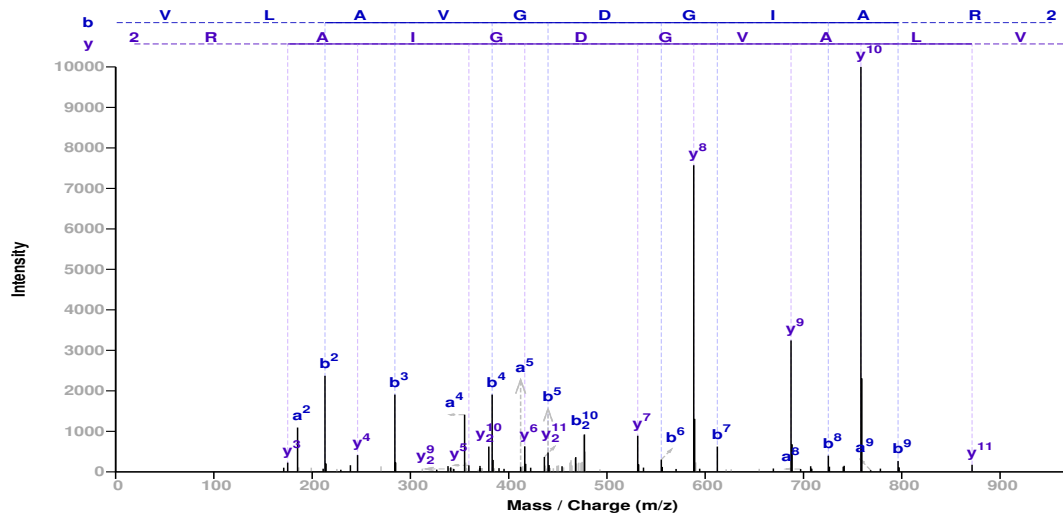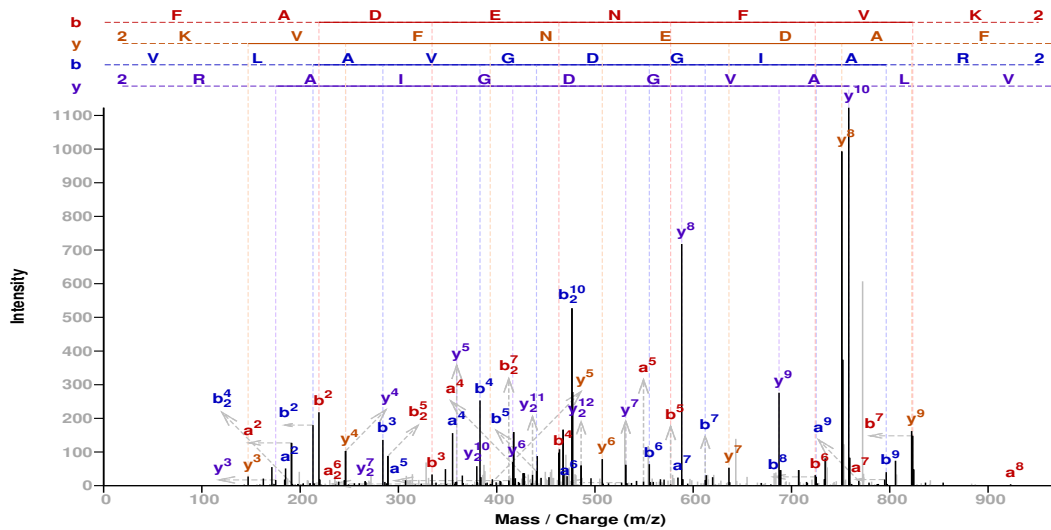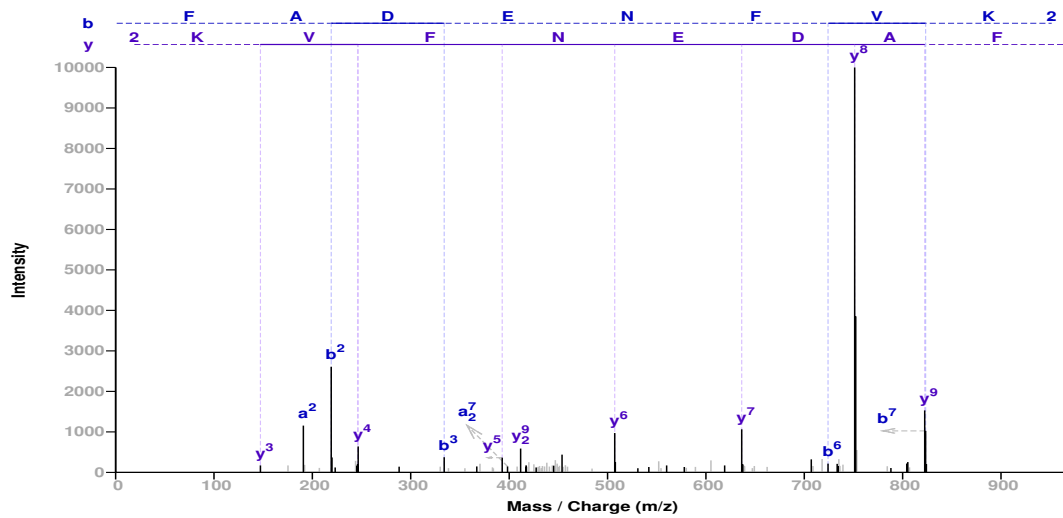

yeast1\_Scan\_Number\_2284 Precursor m/z: 504.755 cosine: 0.841  $\alpha$ : 0.769

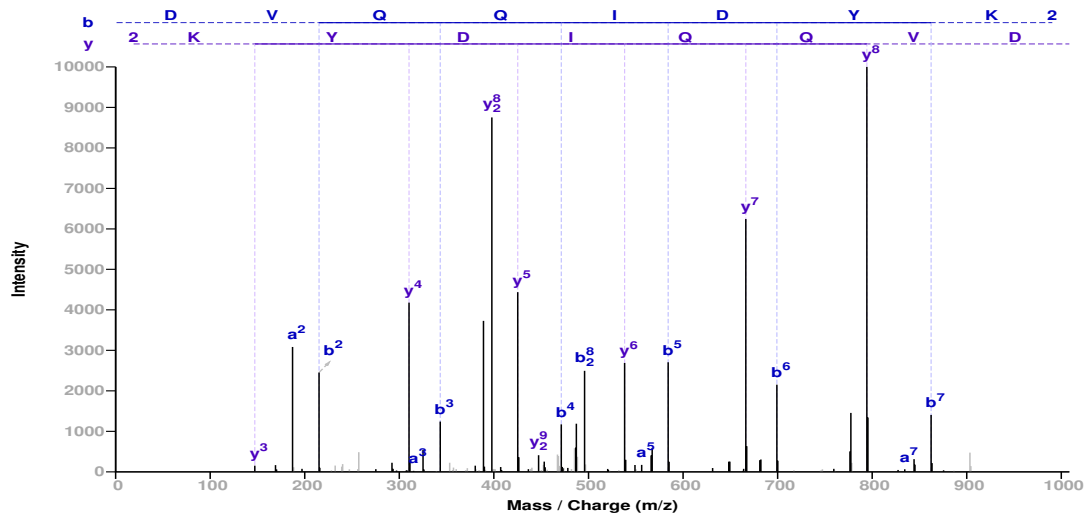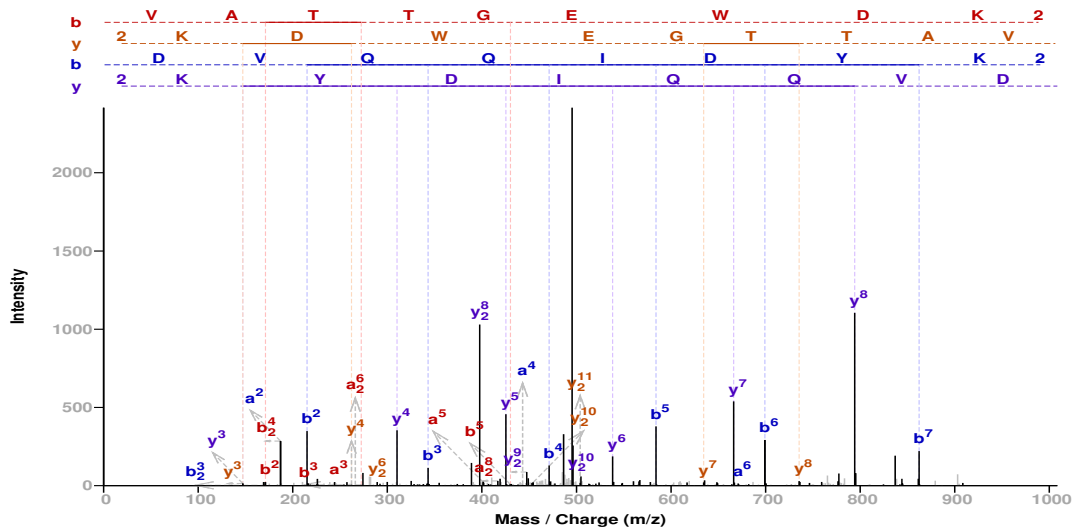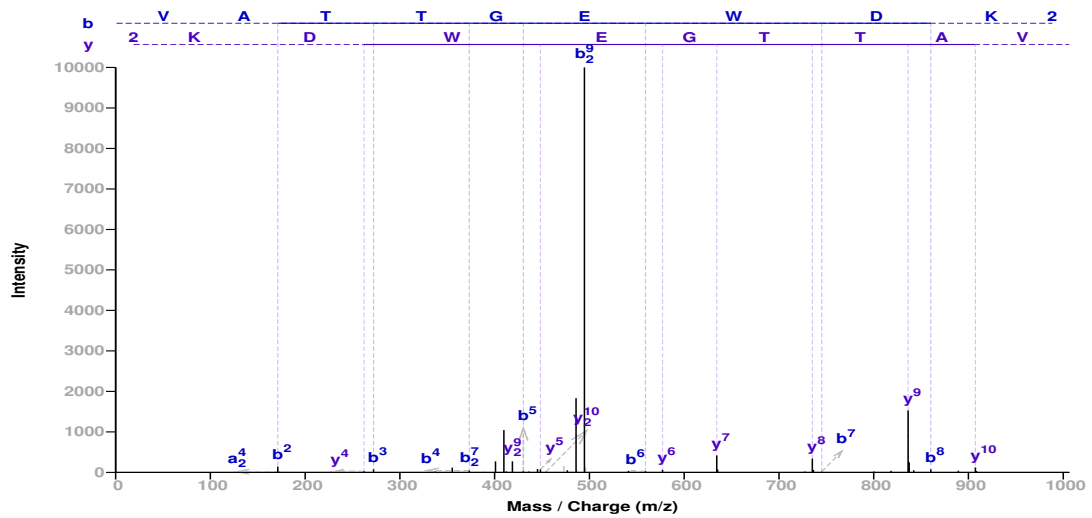

yeast1\_Scan\_Number\_5269 Precursor m/z: 573.328 cosine: 0.809  $\alpha$ : 0.762

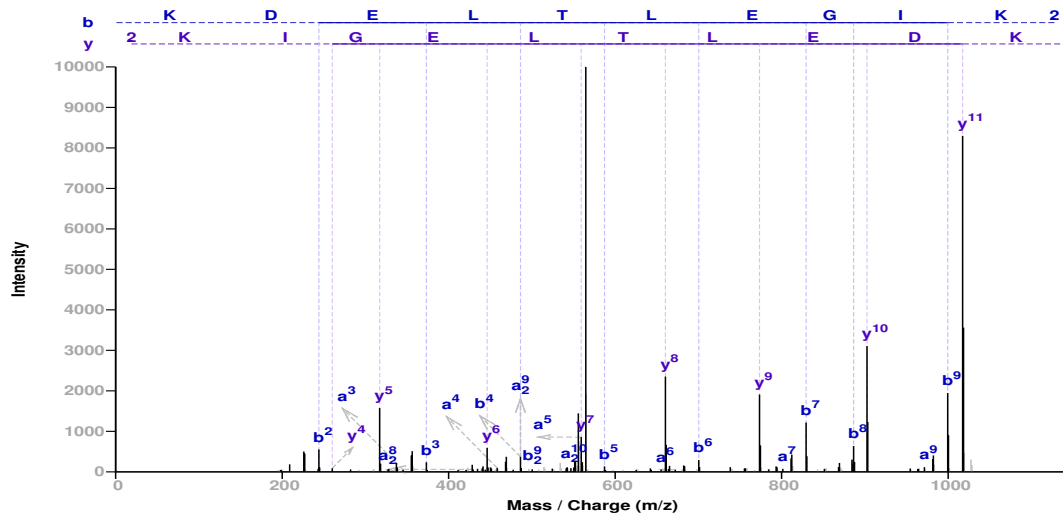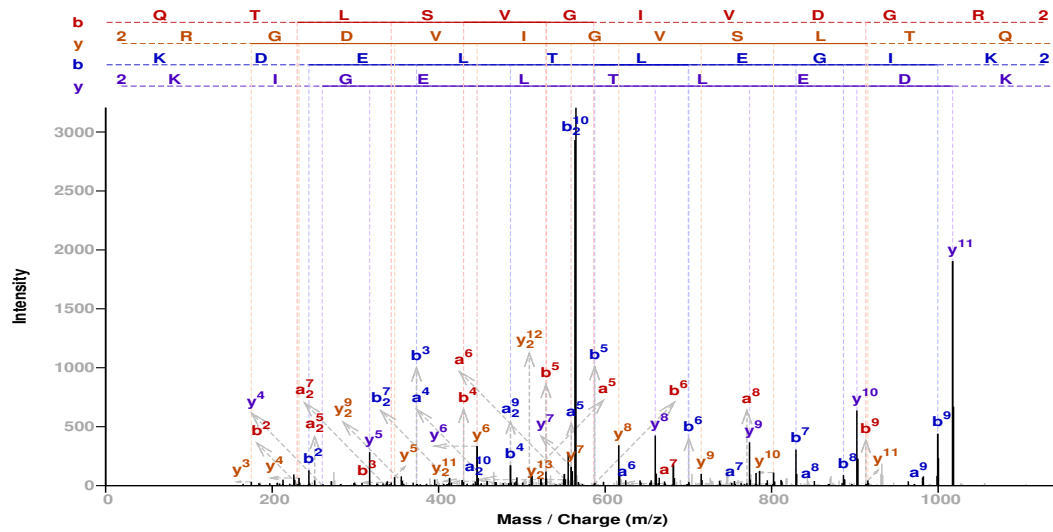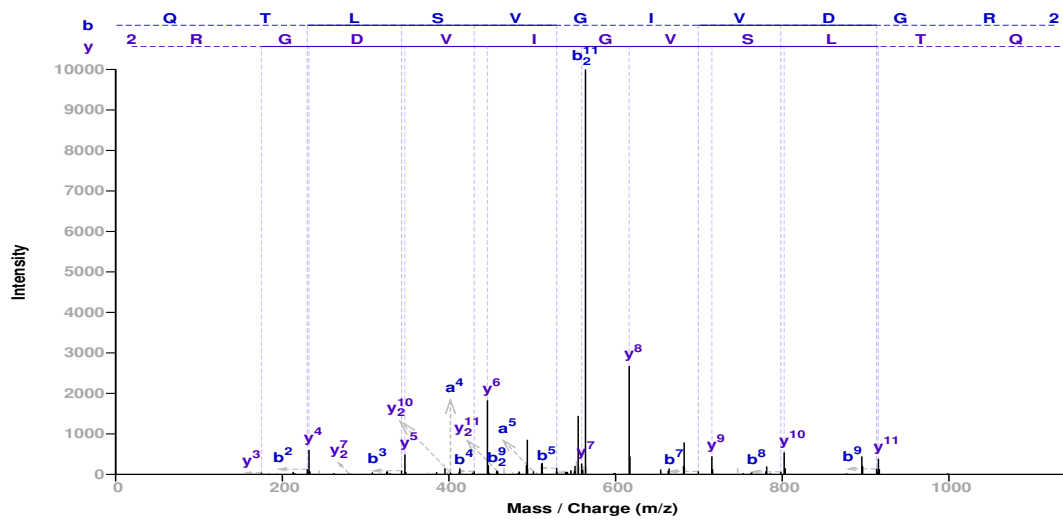

yeast1\_Scan\_Number\_5825 Precursor m/z: 615.973 cosine: 0.743  $\alpha$ : 0.757

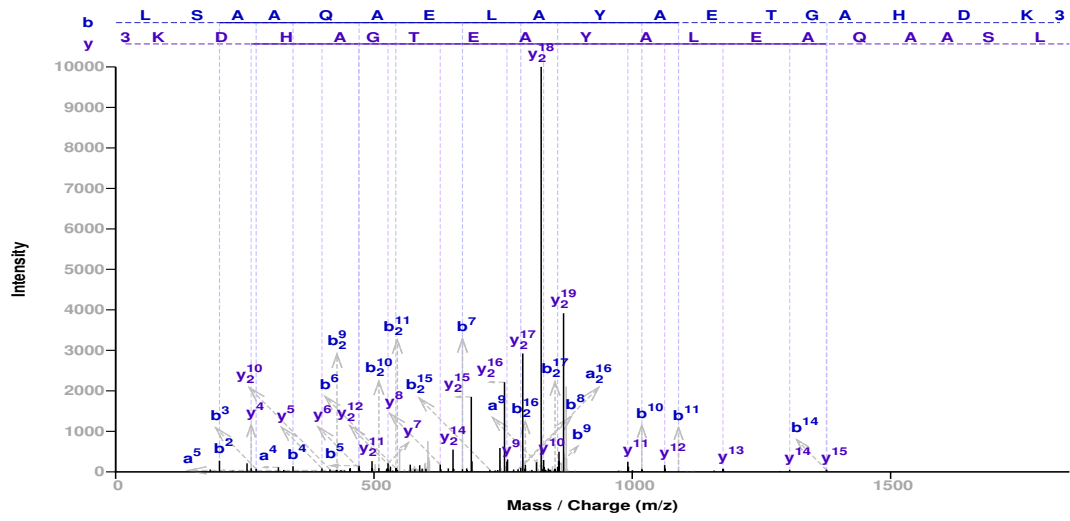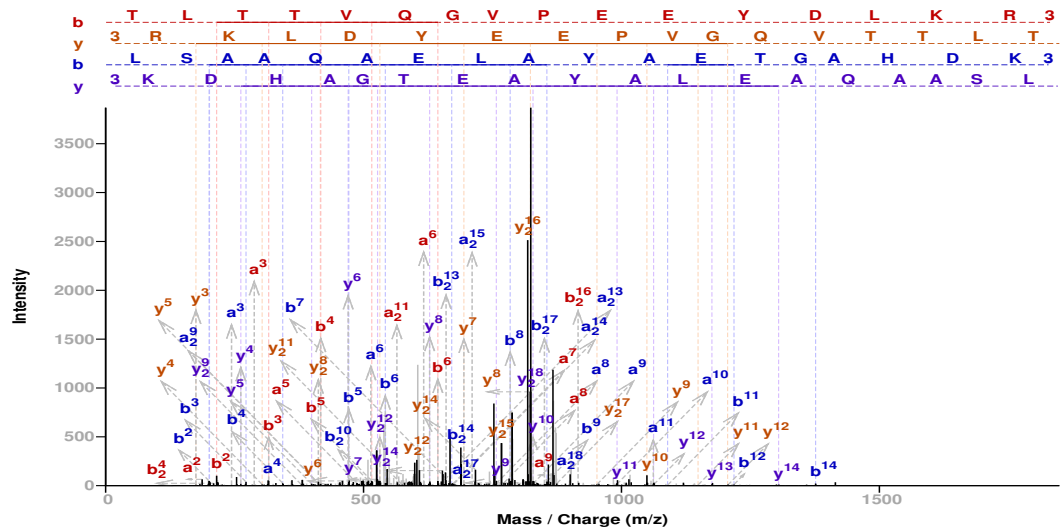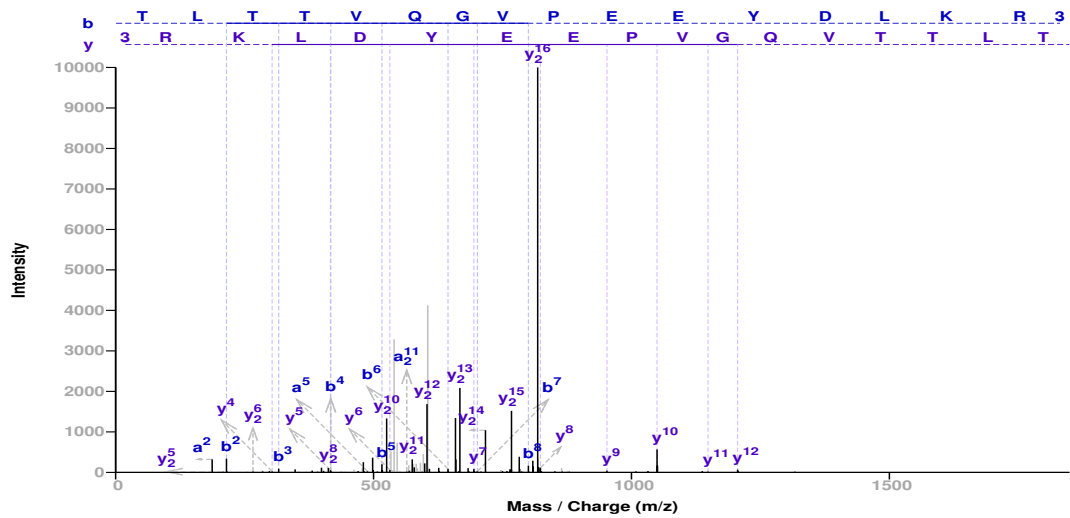

yeast1\_Scan\_Number.1693 Precursor m/z: 433.464 cosine: 0.865  $\alpha$ : 0.735

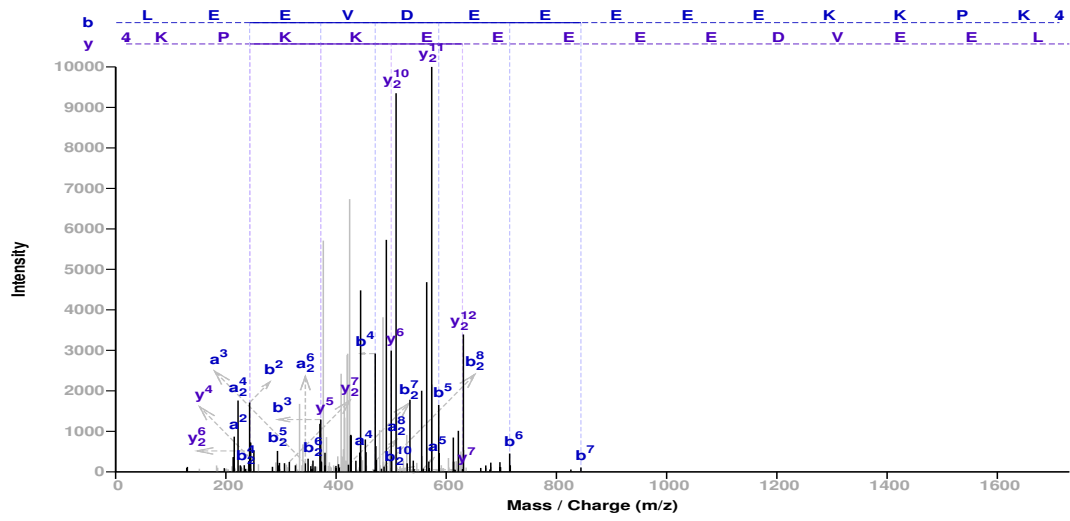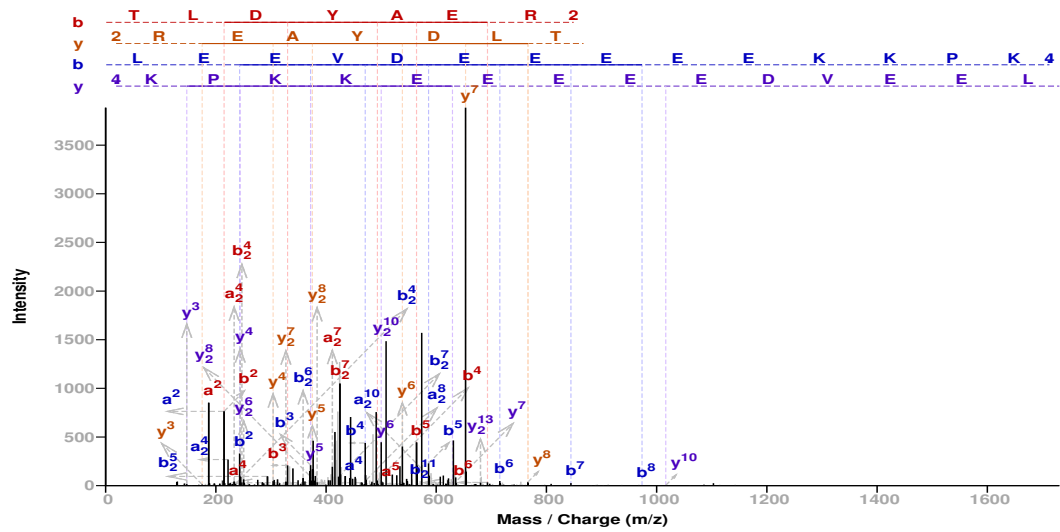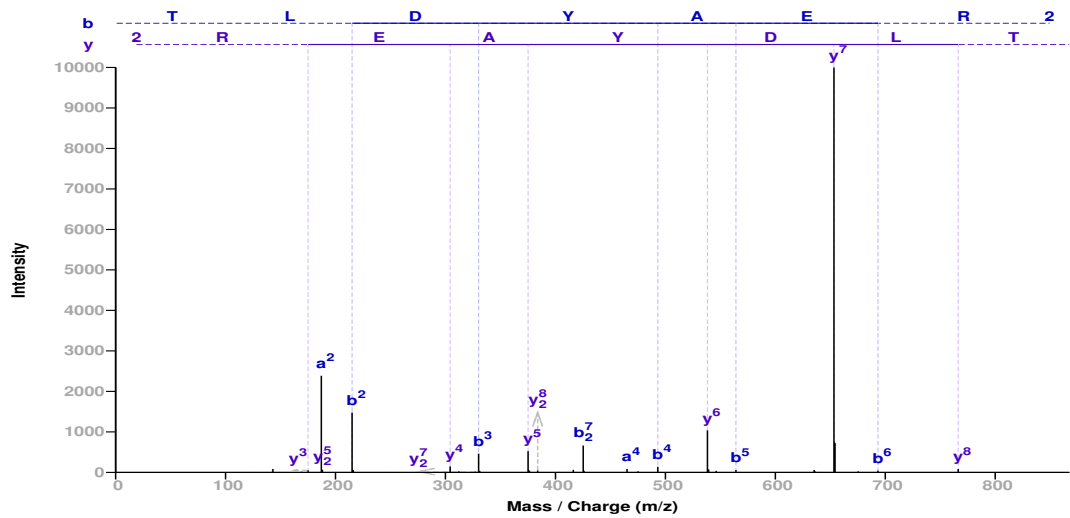



yeast1\_Scan\_Number\_3235 Precursor m/z: 531.783 cosine: 0.754  $\alpha$ : 0.728

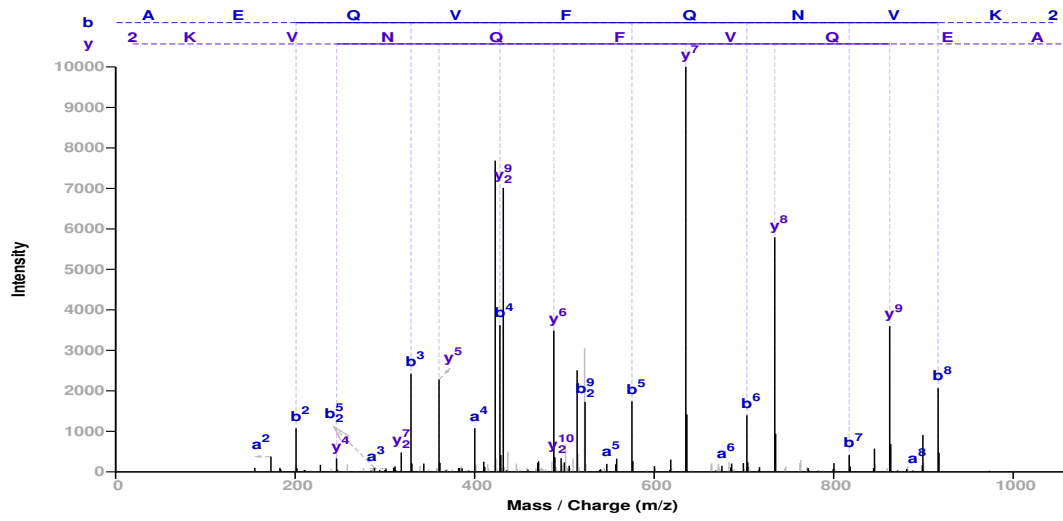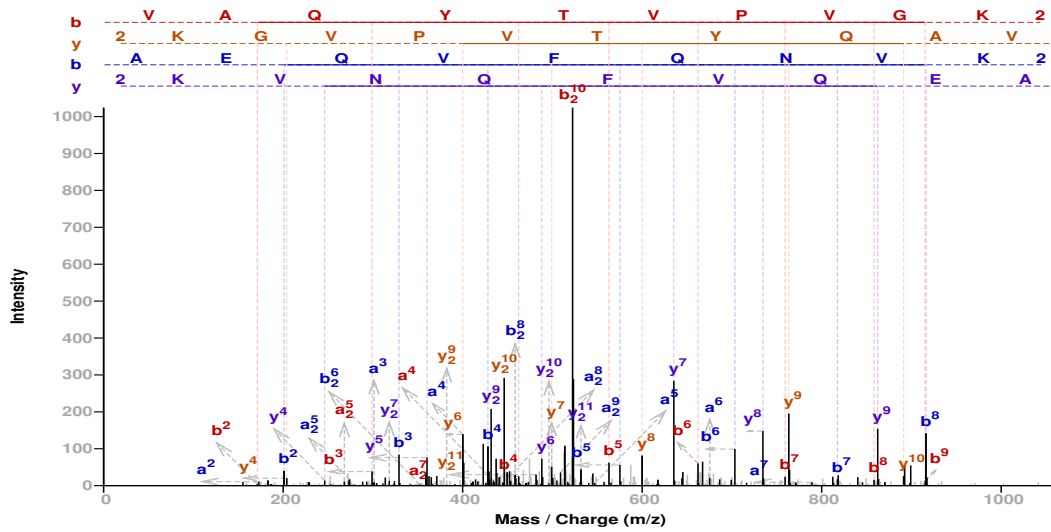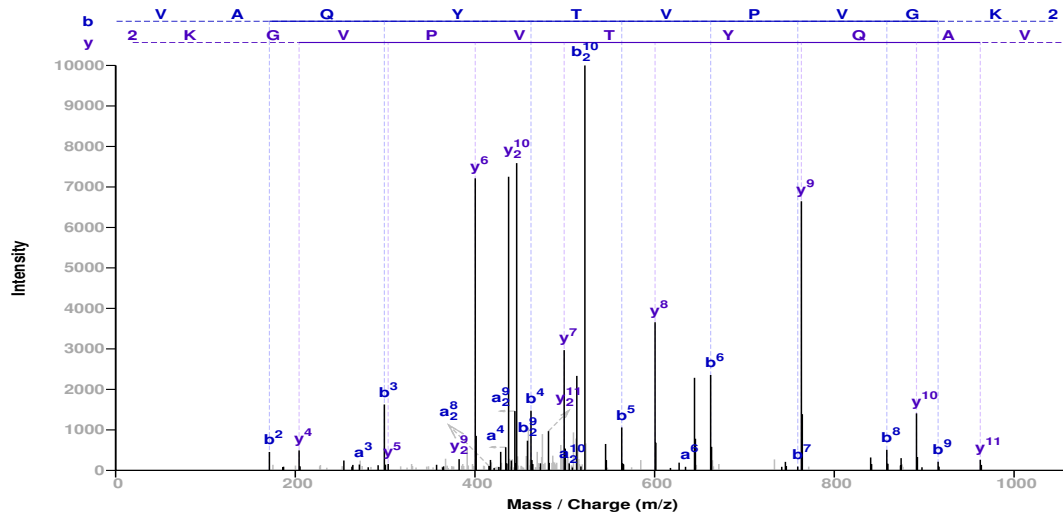

yeast1\_Scan\_Number\_6961 Precursor m/z: 482.269 cosine: 0.790  $\alpha$ : 0.728

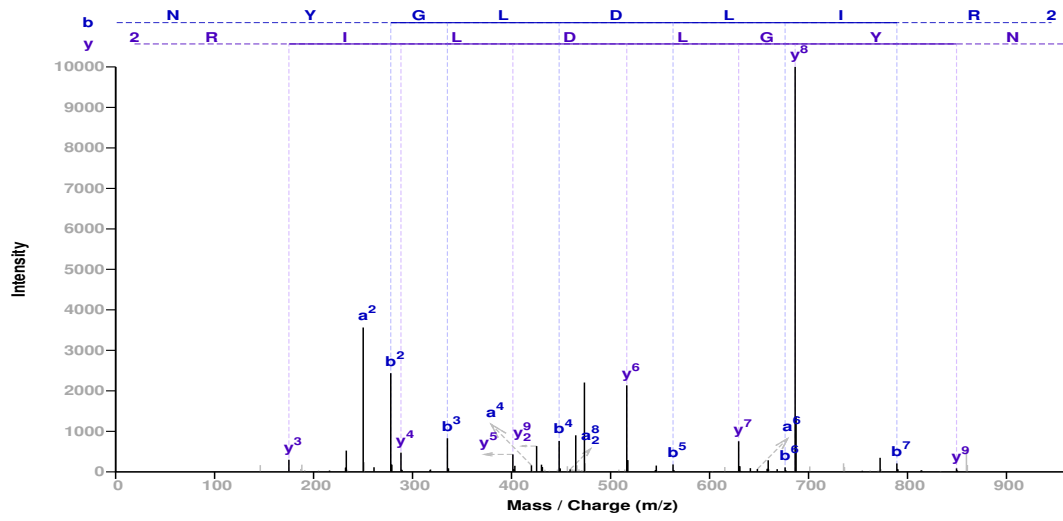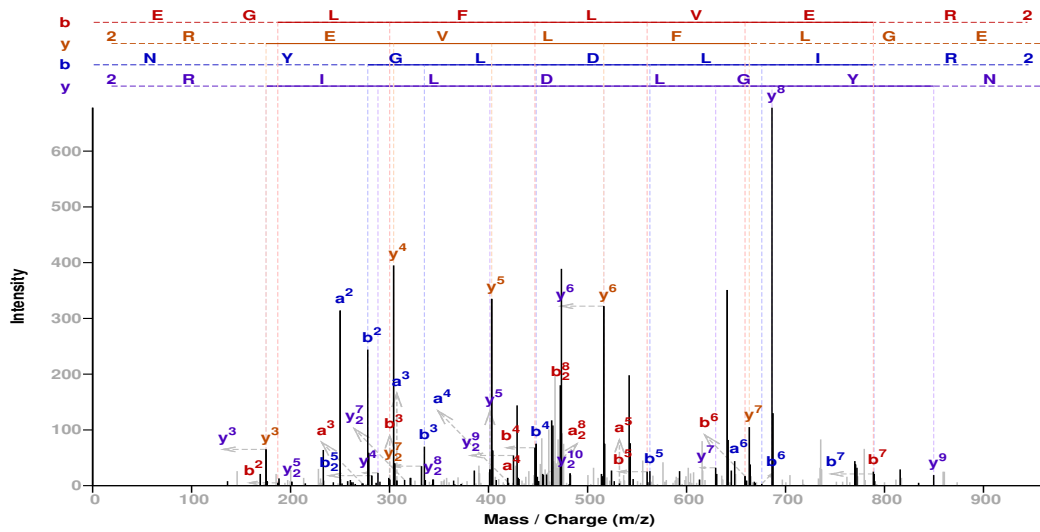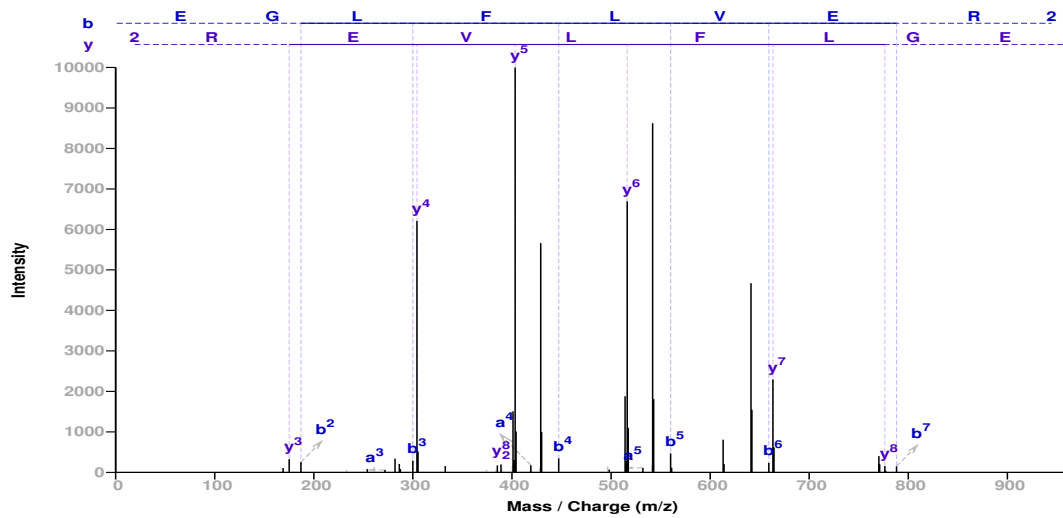

yeast1\_Scan\_Number\_944 Precursor m/z: 488.261 cosine: 0.743  $\alpha$ : 0.727

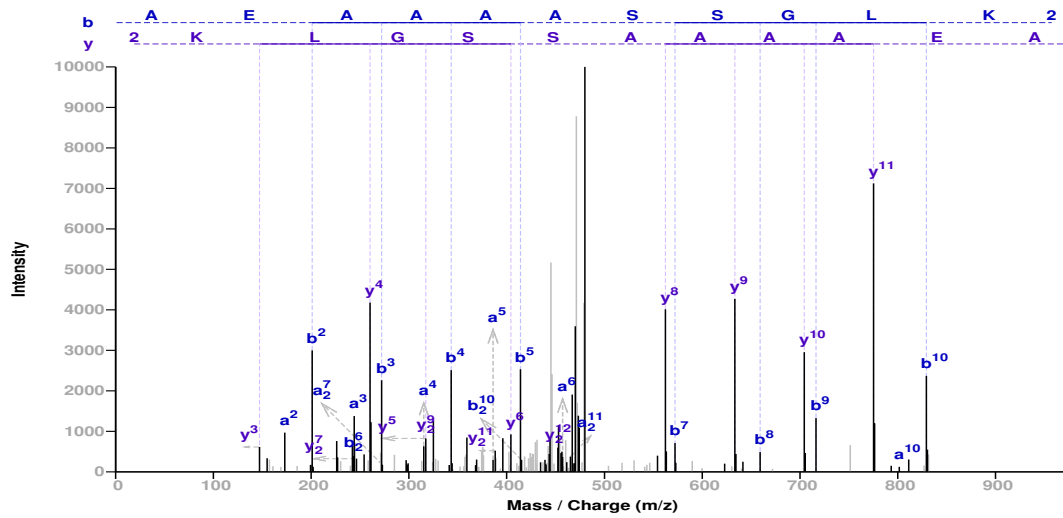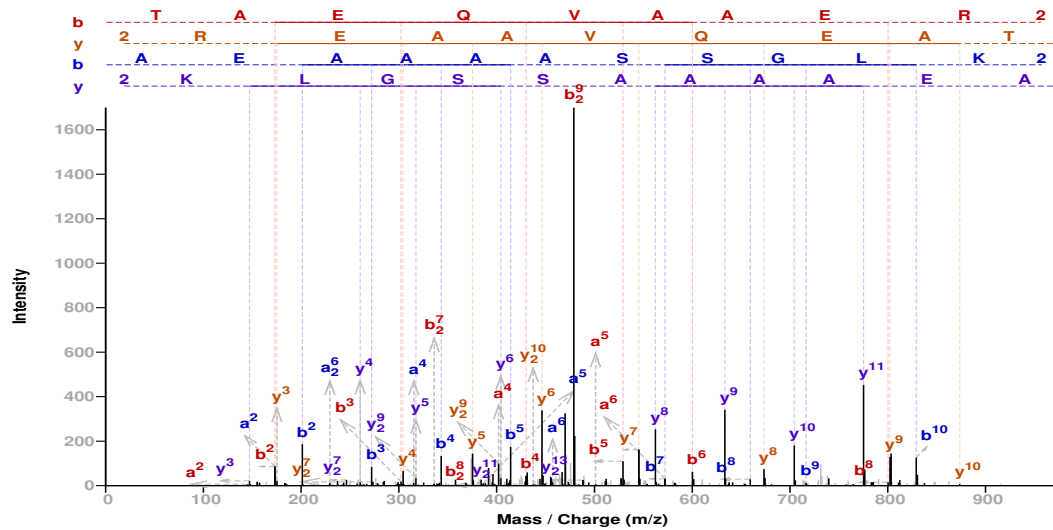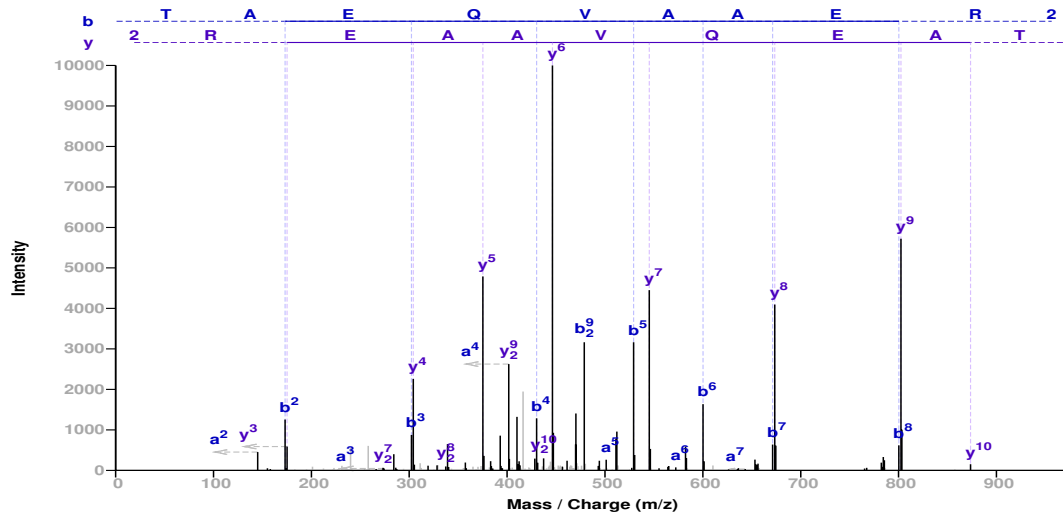

yeast1\_Scan\_Number\_6178 Precursor m/z: 530.761 cosine: 0.774  $\alpha$ : 0.725

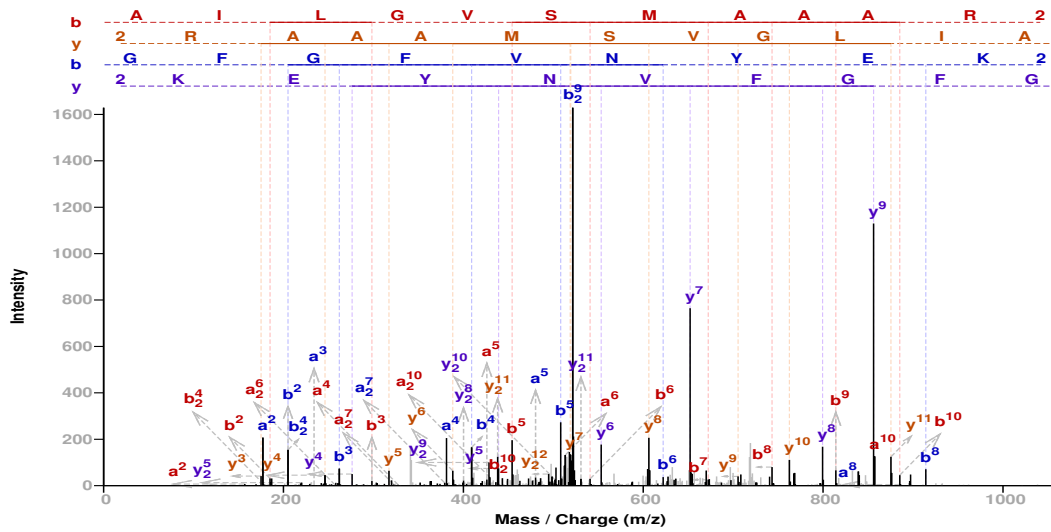

yeast1\_Scan\_Number\_3061 Precursor m/z: 428.257 cosine: 0.820  $\alpha$ : 0.714

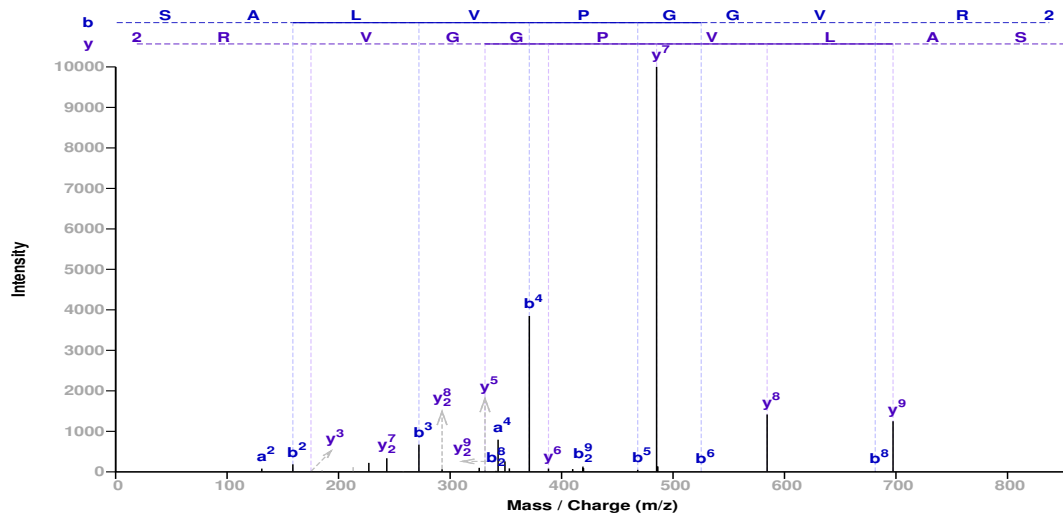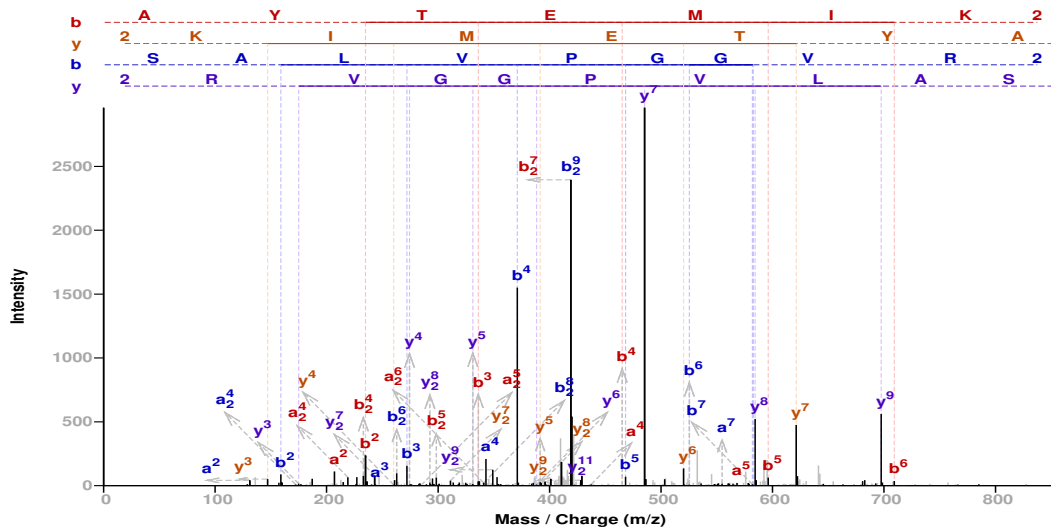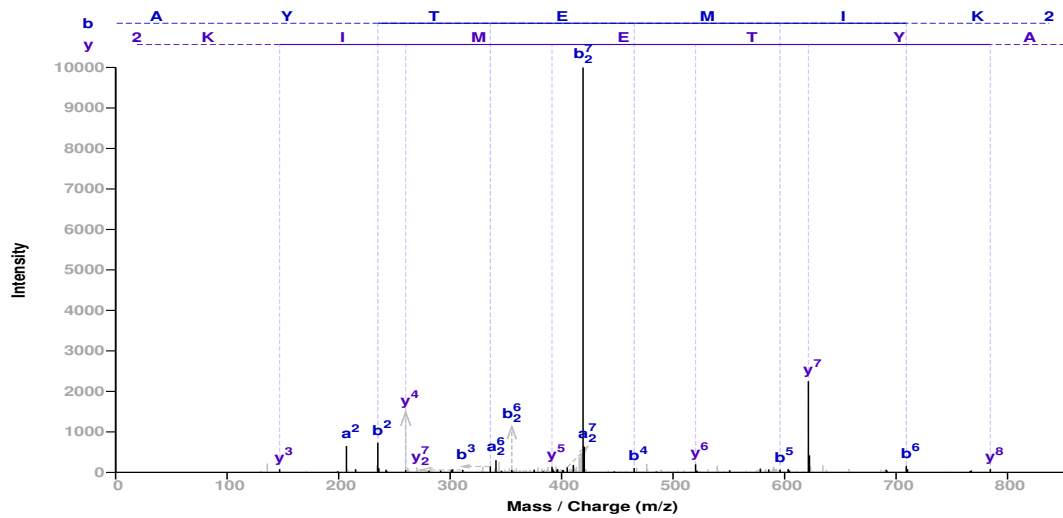

yeast1\_Scan\_Number\_1695 Precursor m/z: 461.742 cosine: 0.748  $\alpha$ : 0.709

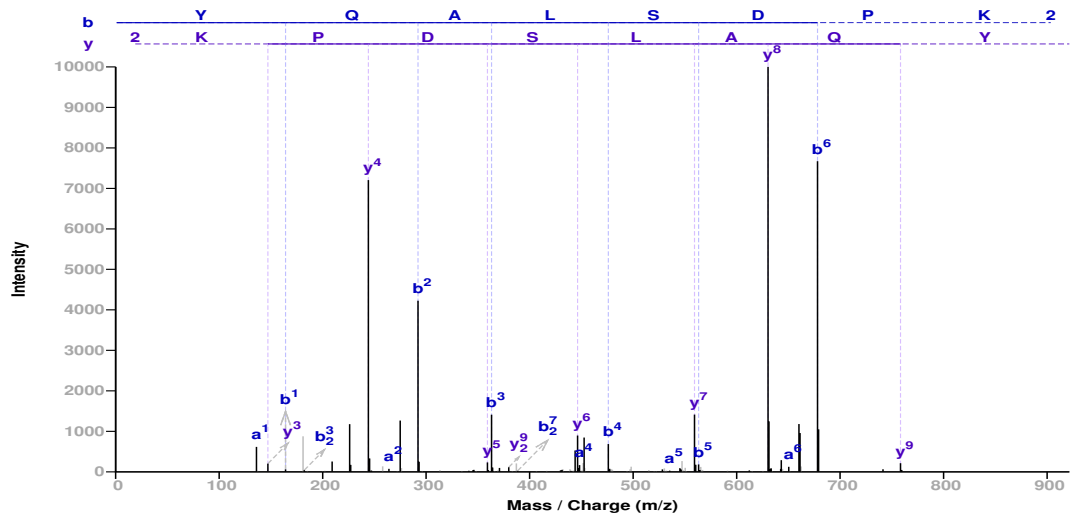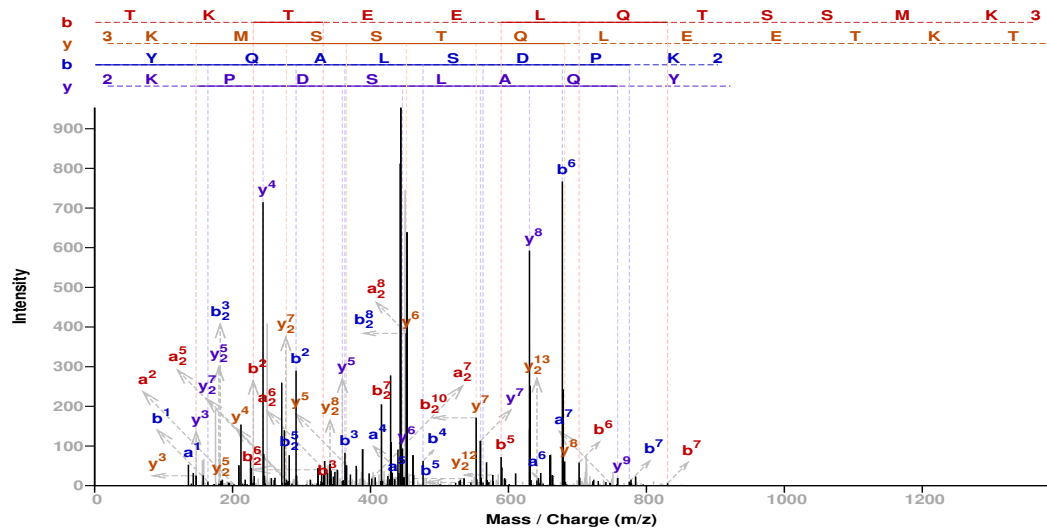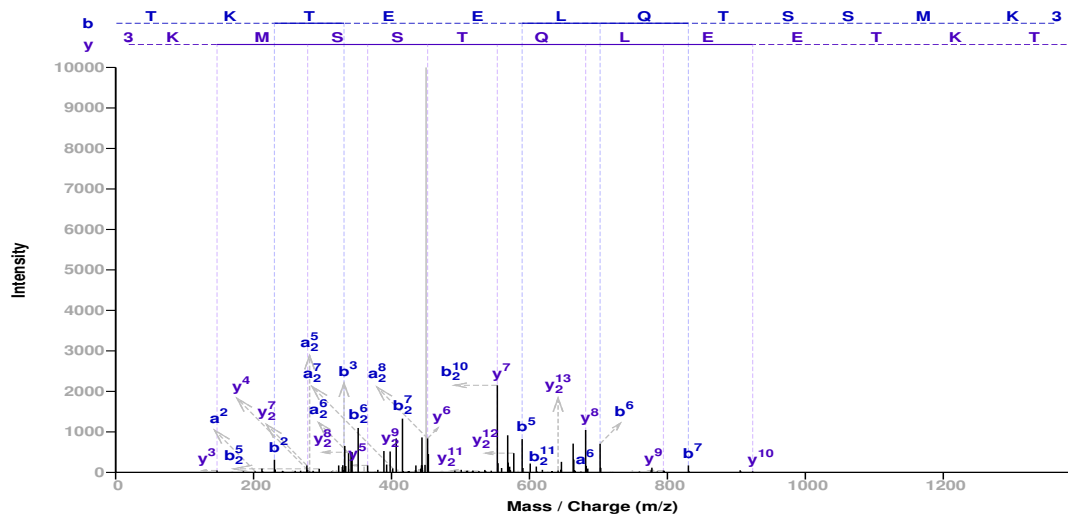

yeast1\_Scan\_Number\_5539 Precursor m/z: 478.297 cosine: 0.778  $\alpha$ : 0.709

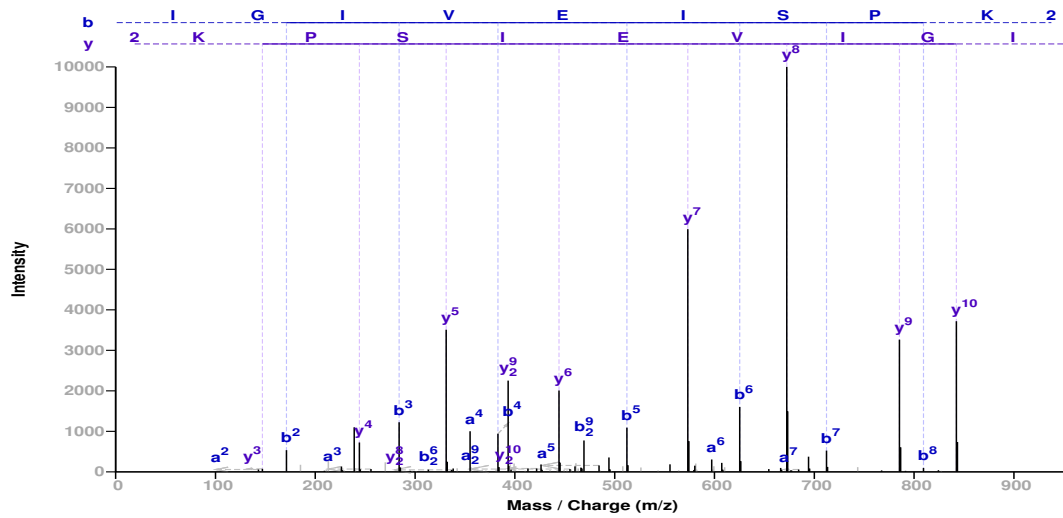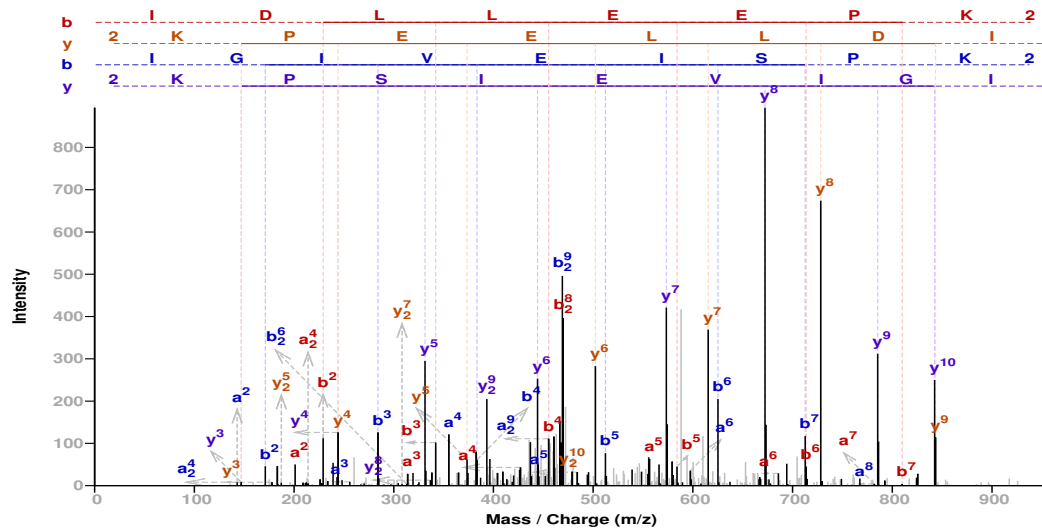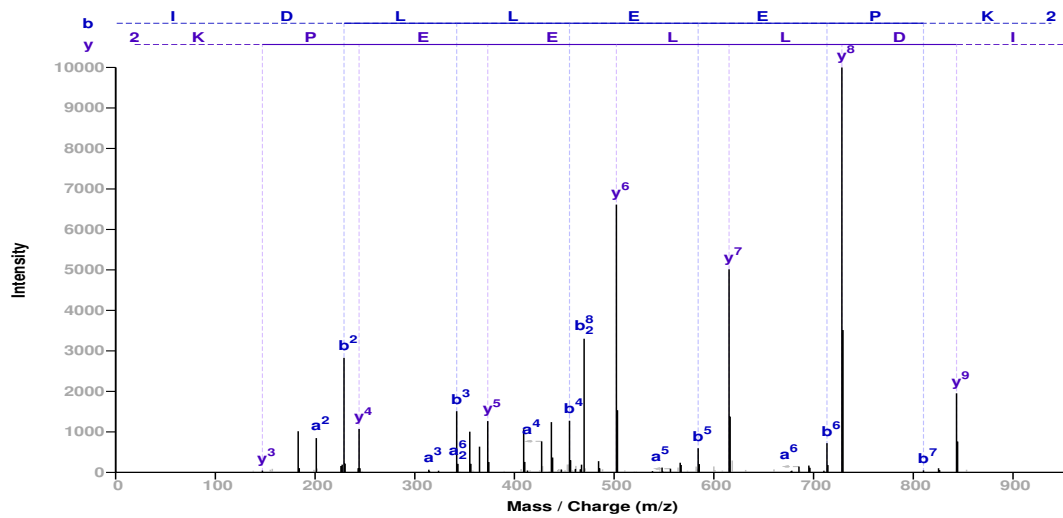

yeast1\_Scan\_Number\_1537 Precursor m/z: 509.248 cosine: 0.851  $\alpha$ : 0.706

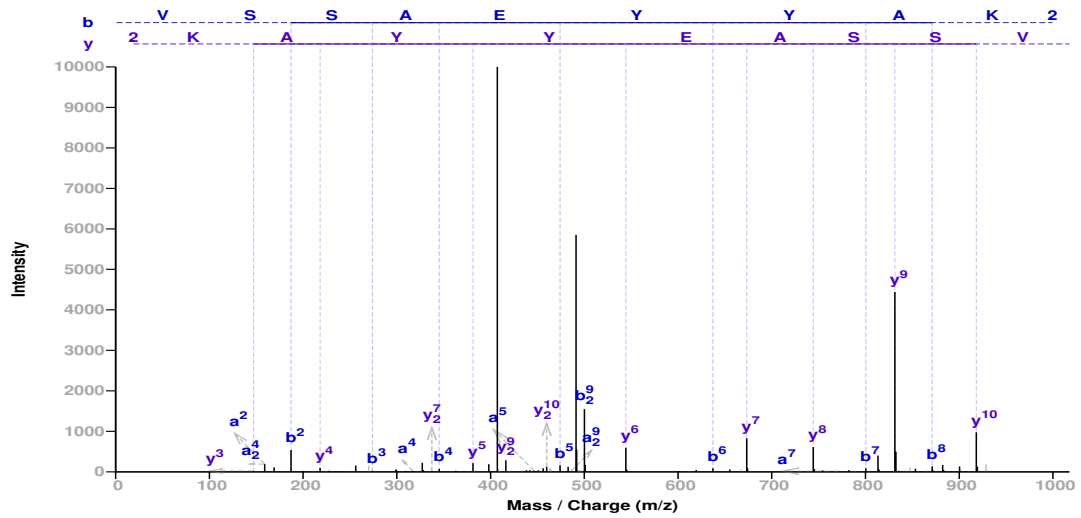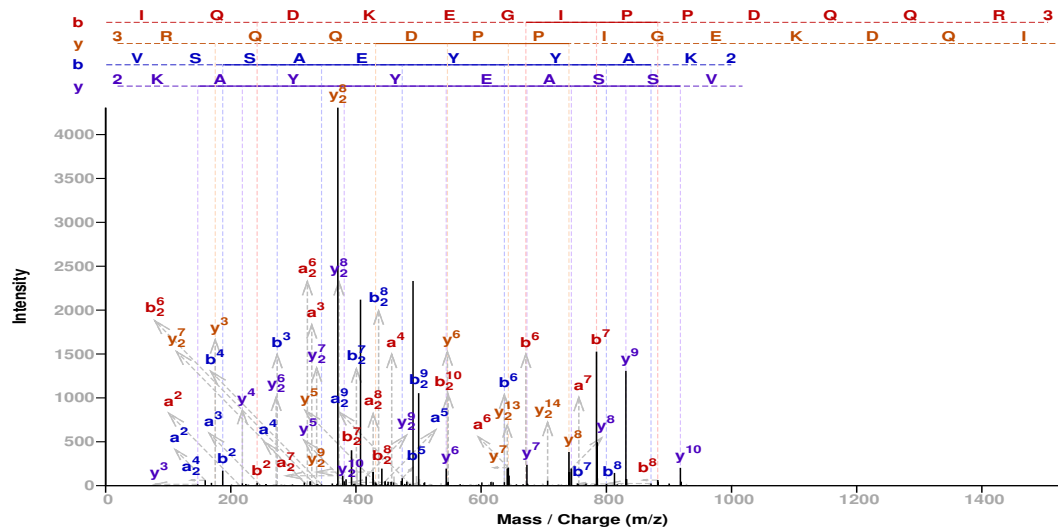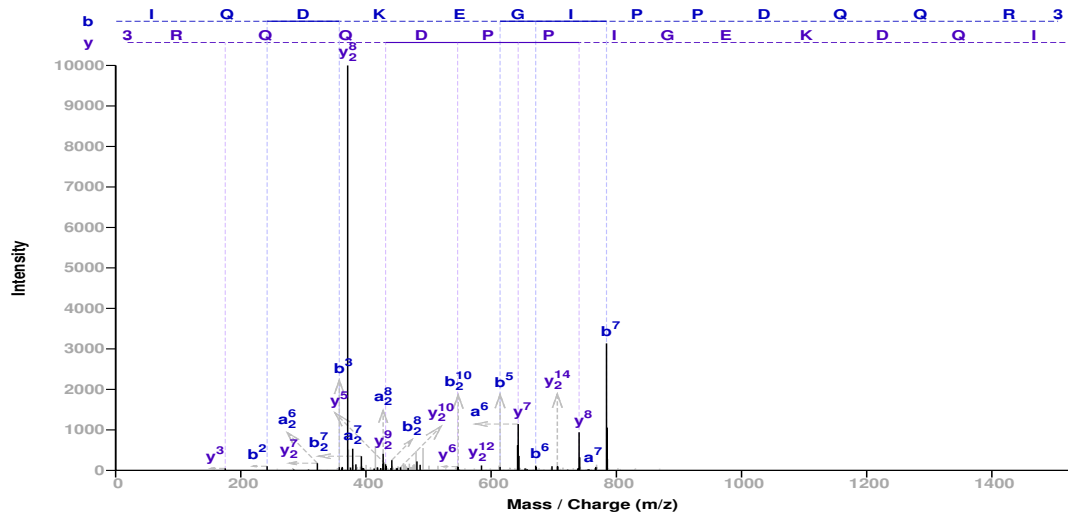



yeast1\_Scan\_Number\_7112 Precursor m/z: 528.300 cosine: 0.727  $\alpha$ : 0.704

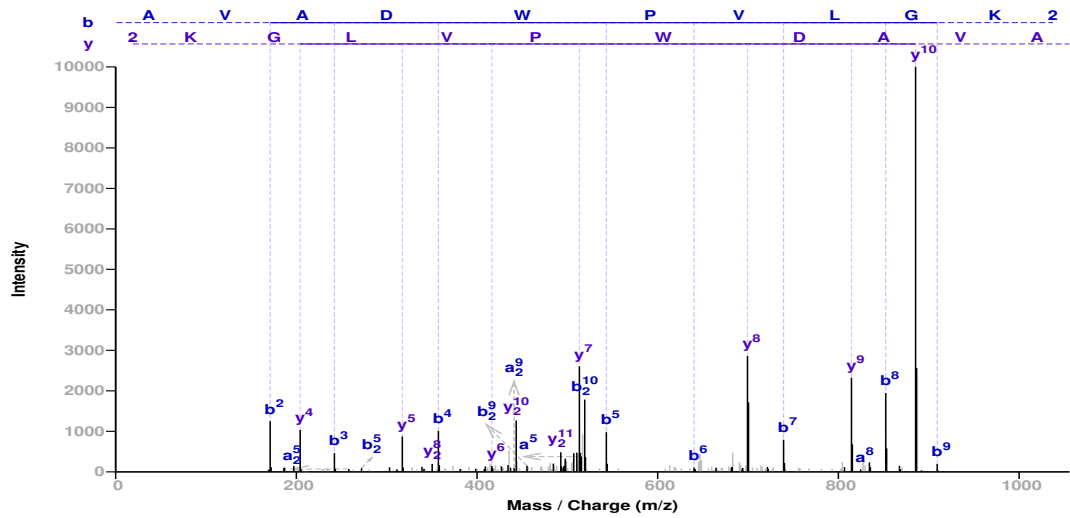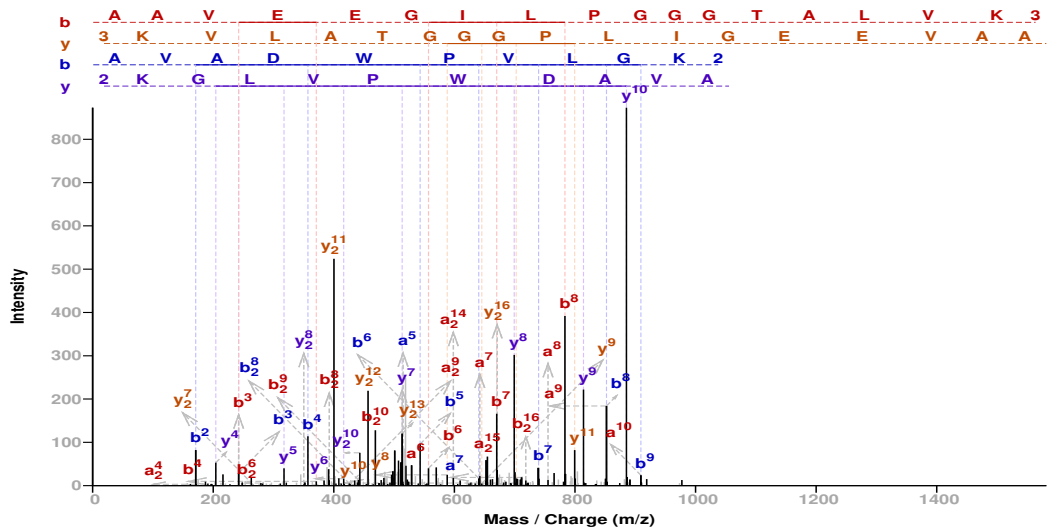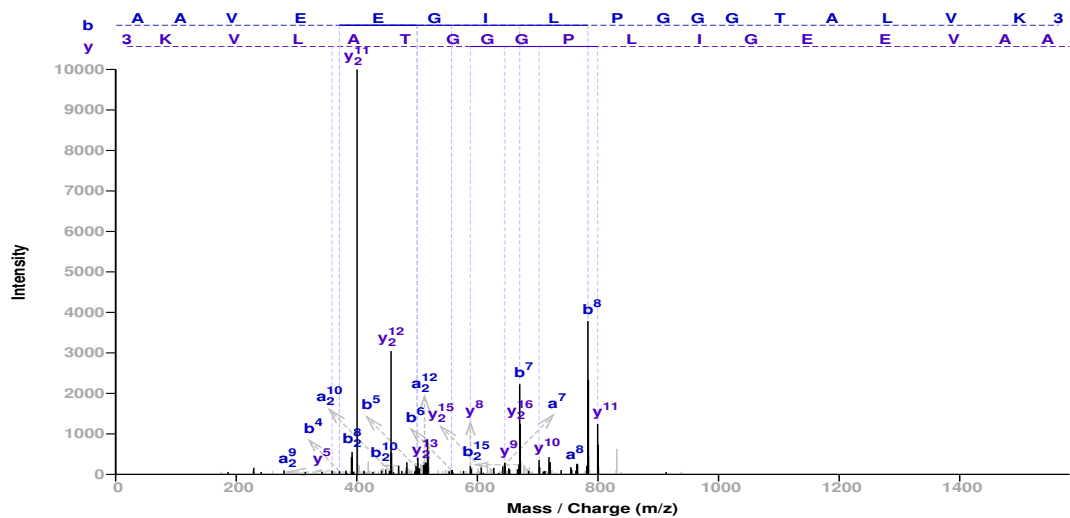



yeast1\_Scan\_Number\_6291 Precursor m/z: 730.871 cosine: 0.869  $\alpha$ : 0.693

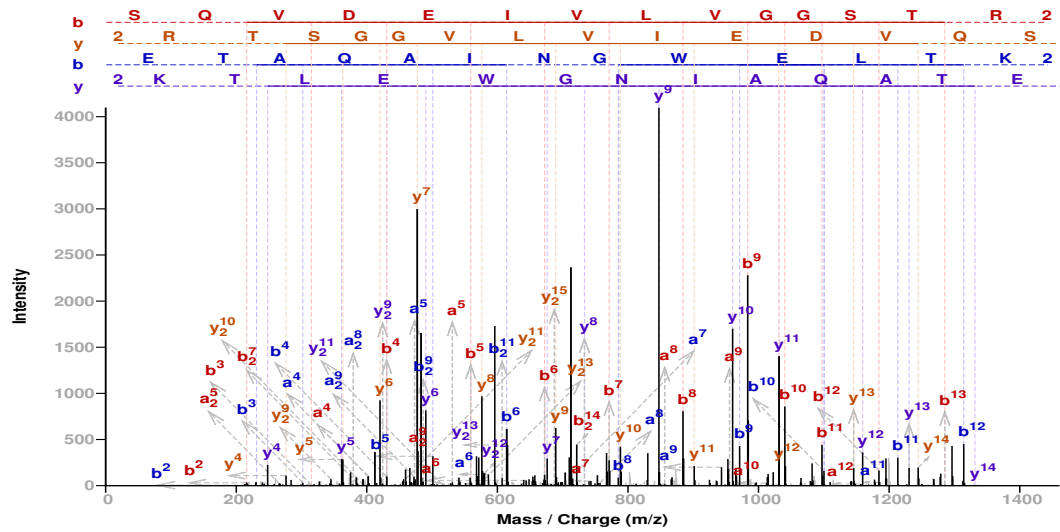

yeast1\_Scan\_Number\_4326 Precursor m/z: 462.575 cosine: 0.905  $\alpha$ : 0.691

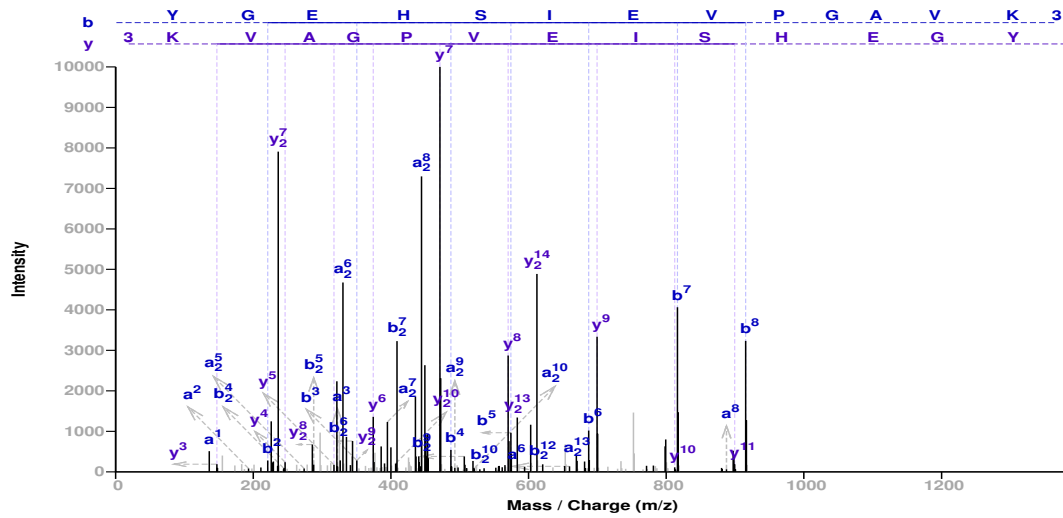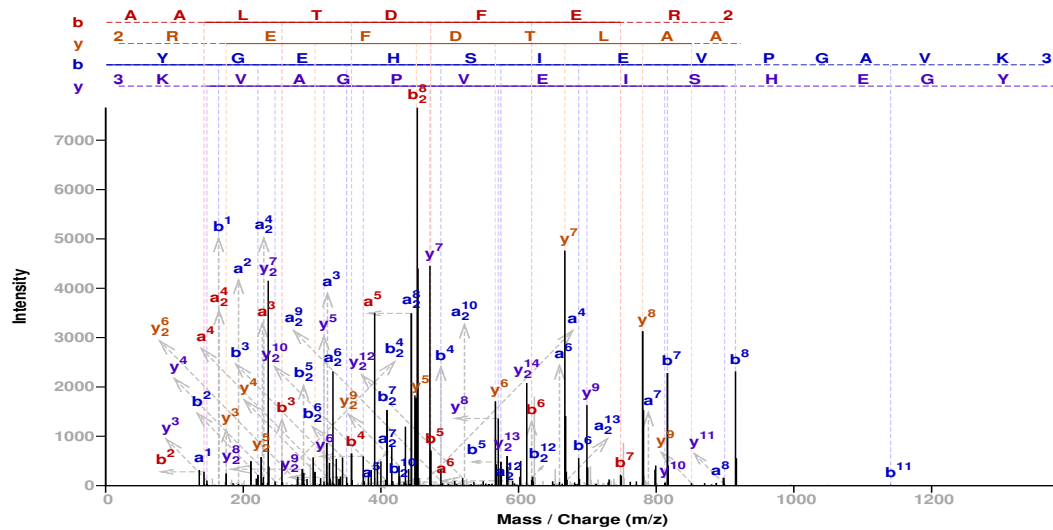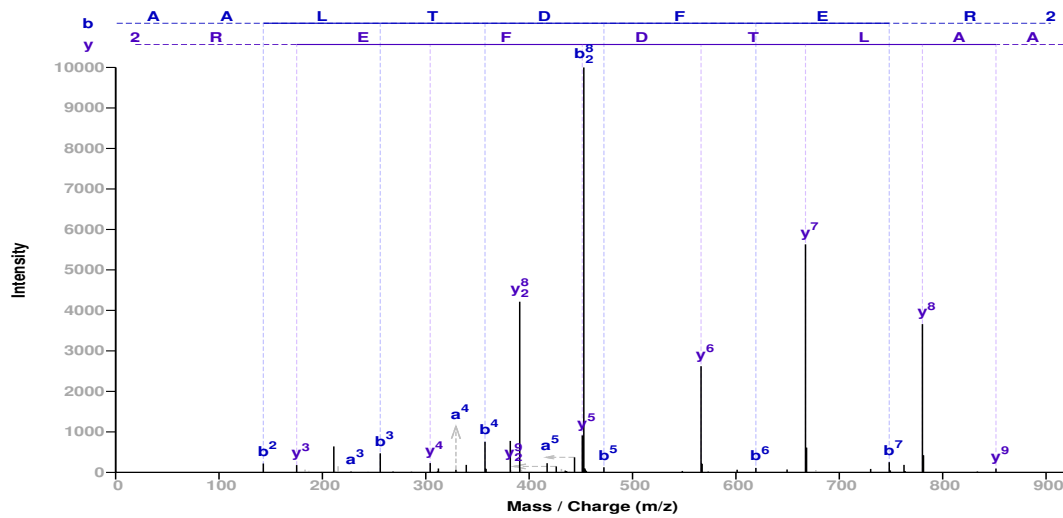

yeast1\_Scan\_Number\_1780 Precursor m/z: 387.213 cosine: 0.903  $\alpha$ : 0.691

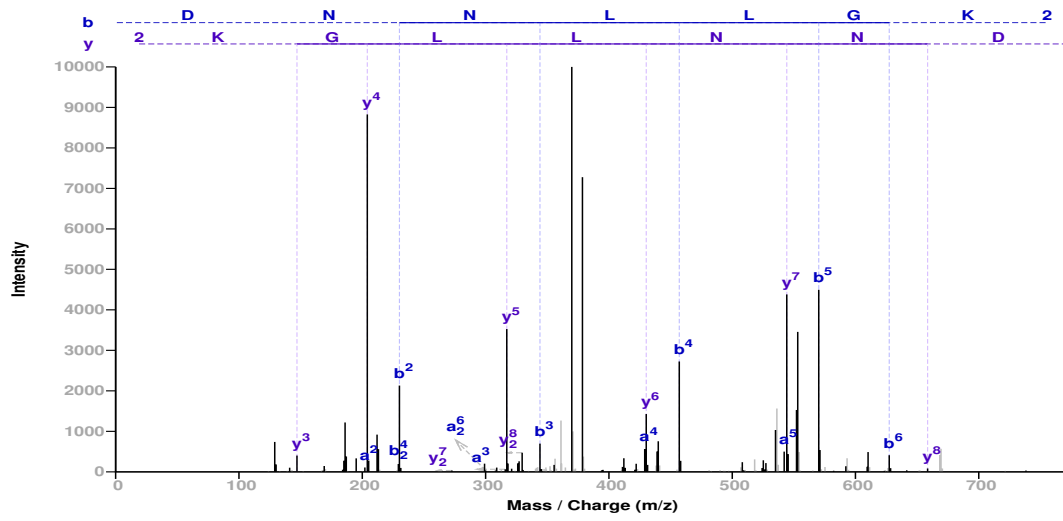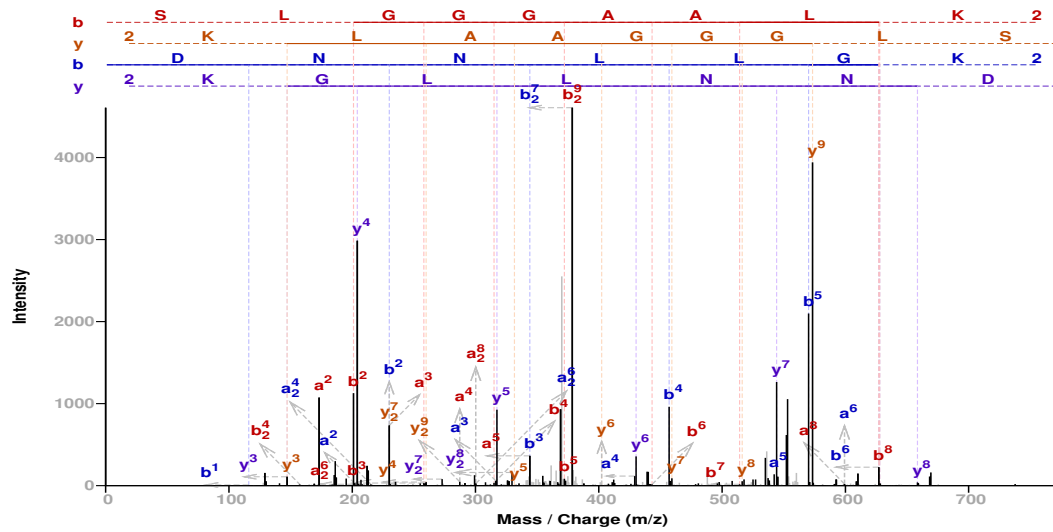

yeast1\_Scan\_Number\_4651 Precursor m/z: 477.579 cosine: 0.727  $\alpha$ : 0.686

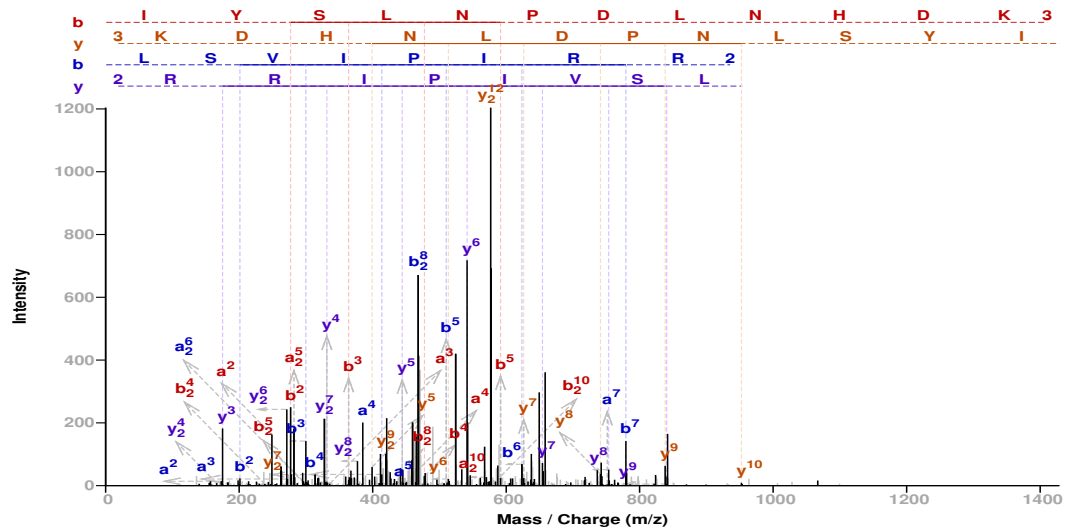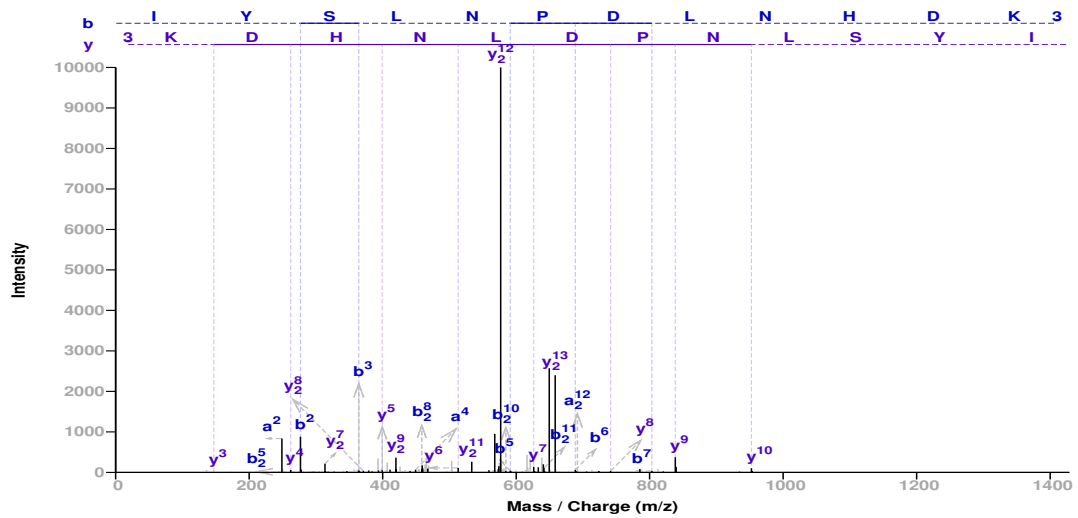

yeast1\_Scan\_Number\_1316 Precursor m/z: 411.231 cosine: 0.911  $\alpha$ : 0.675

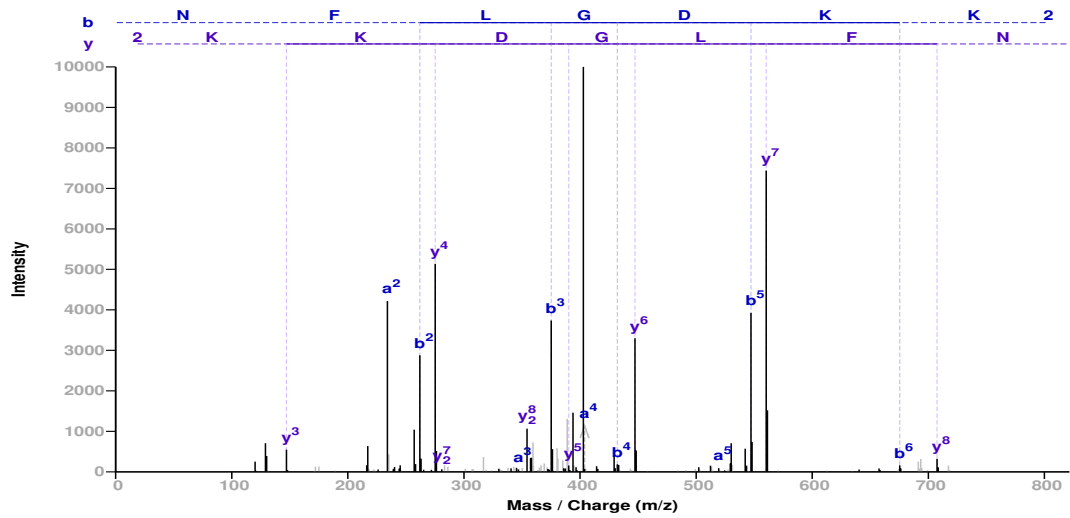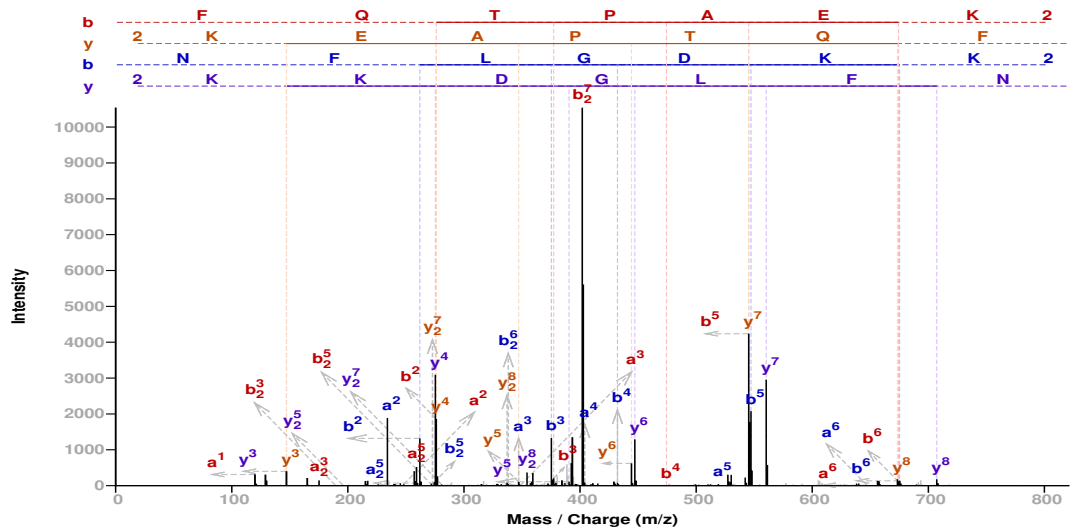

yeast1\_Scan\_Number\_2761 Precursor m/z: 596.304 cosine: 0.751  $\alpha$ : 0.672

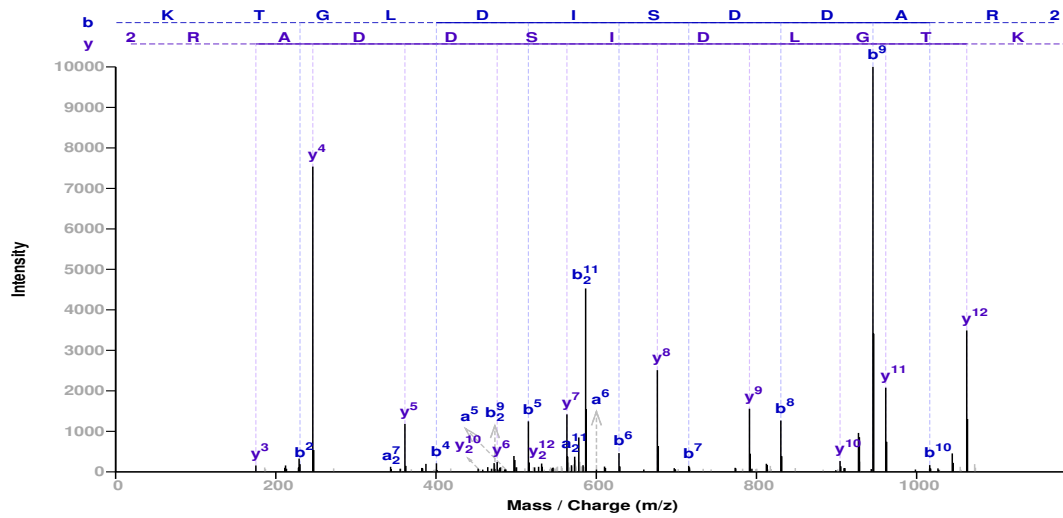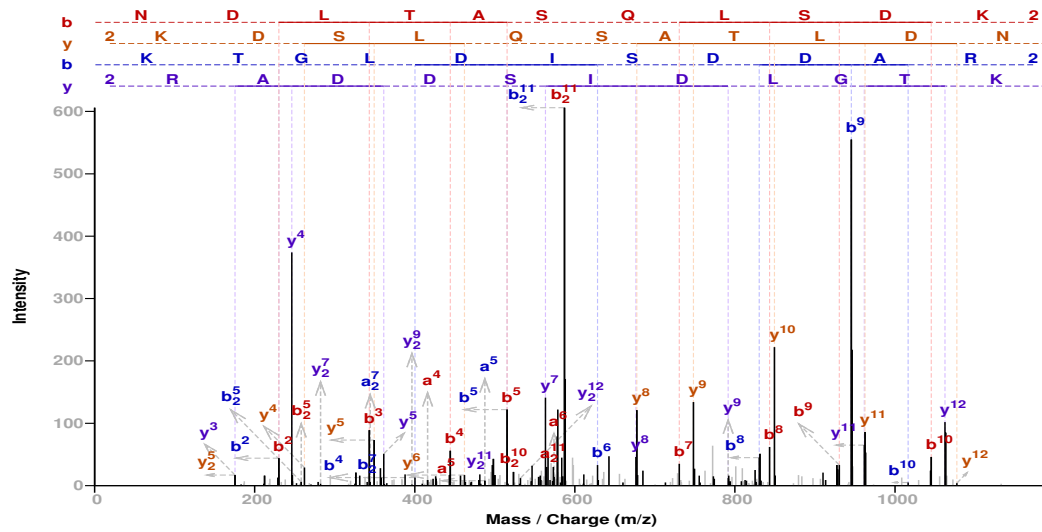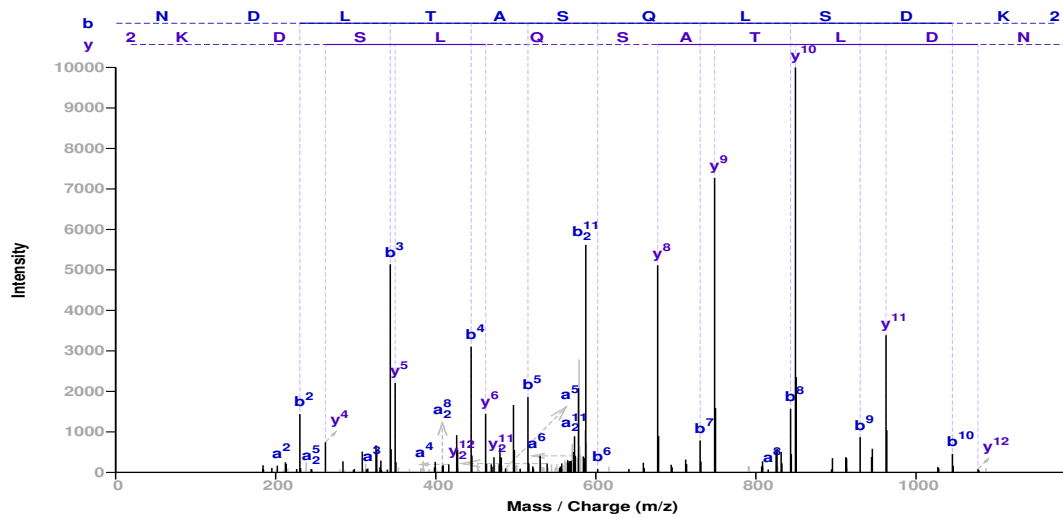



yeast1\_Scan\_Number\_2131 Precursor m/z: 404.223 cosine: 0.764  $\alpha$ : 0.662

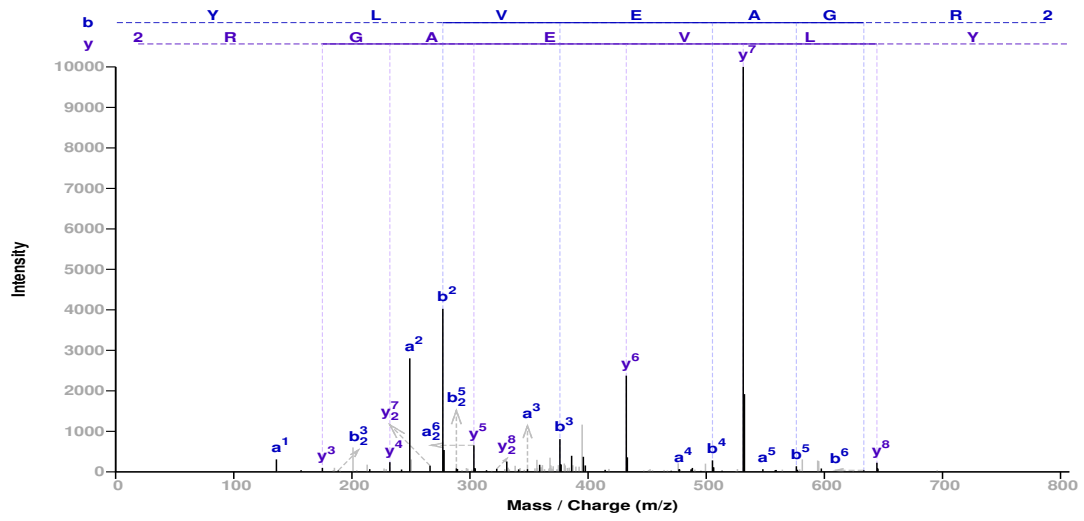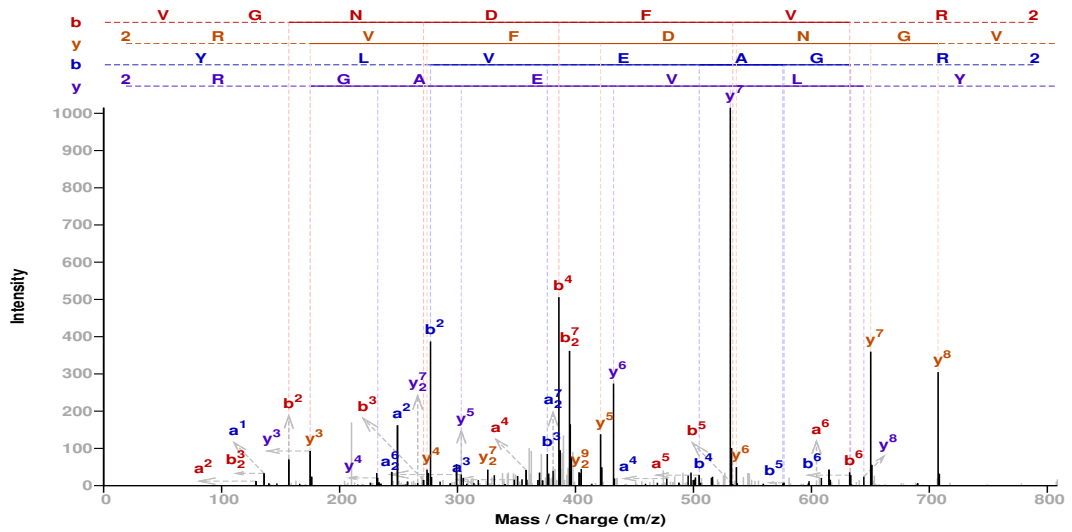

yeast1\_Scan\_Number\_2355 Precursor m/z: 418.731 cosine: 0.790  $\alpha$ : 0.661

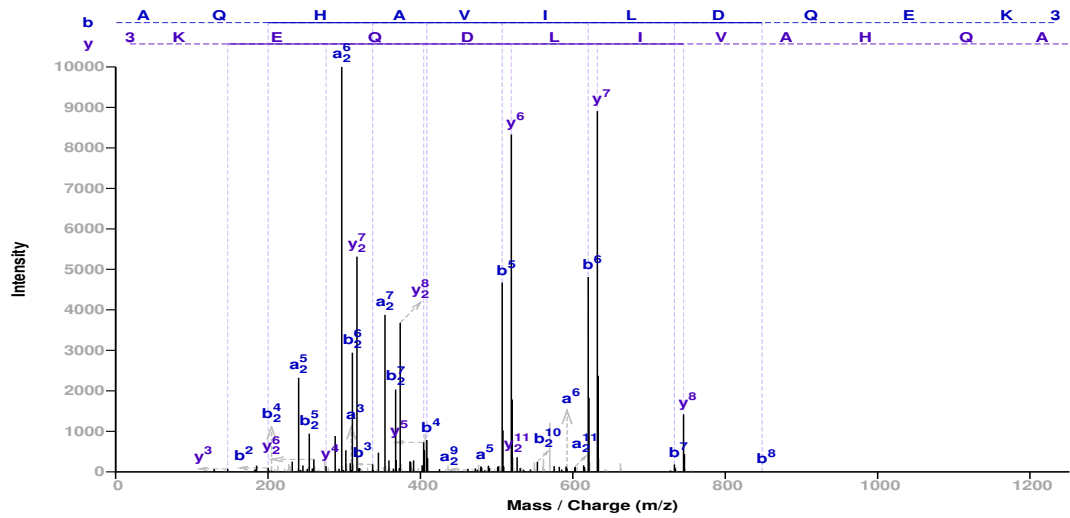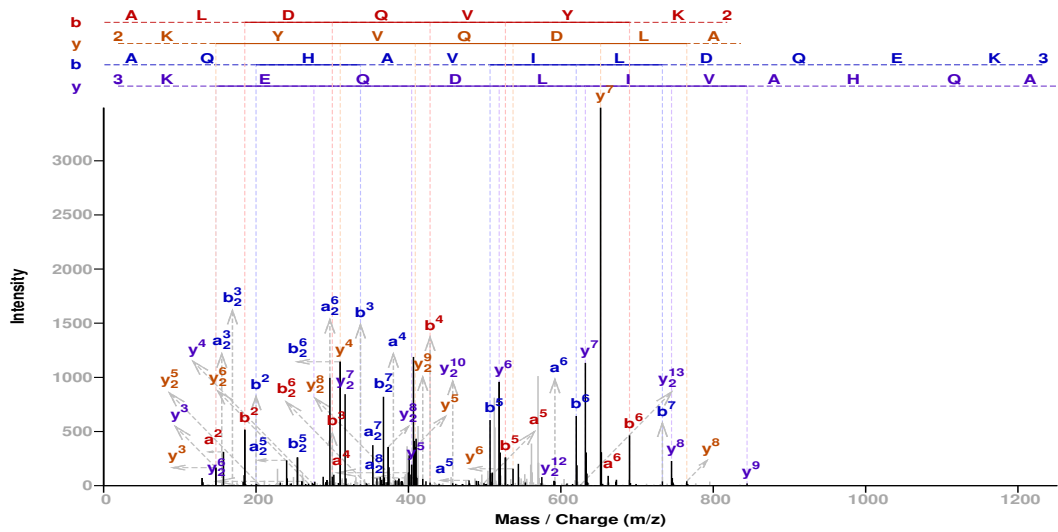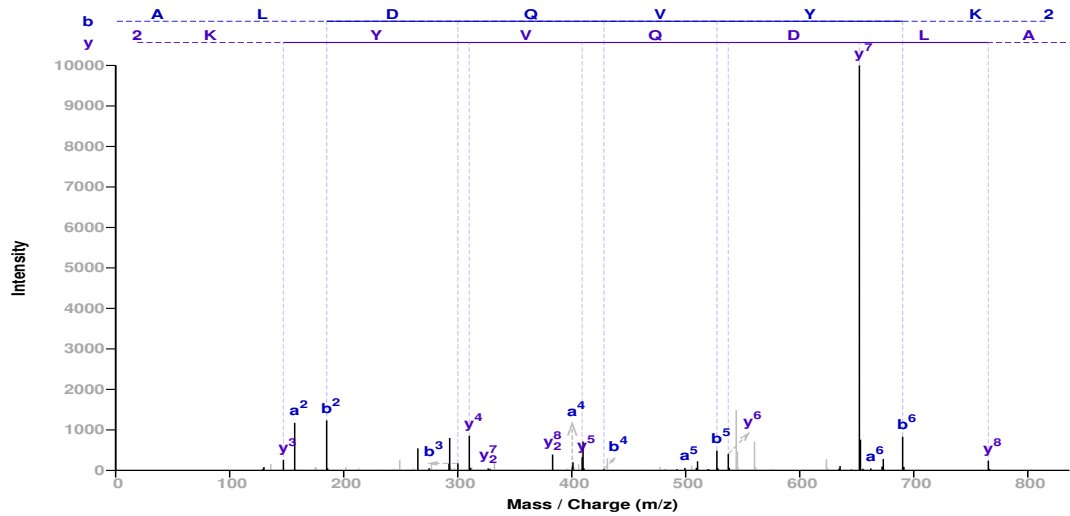

yeast1\_Scan\_Number\_3146 Precursor m/z: 451.273 cosine: 0.779  $\alpha$ : 0.661

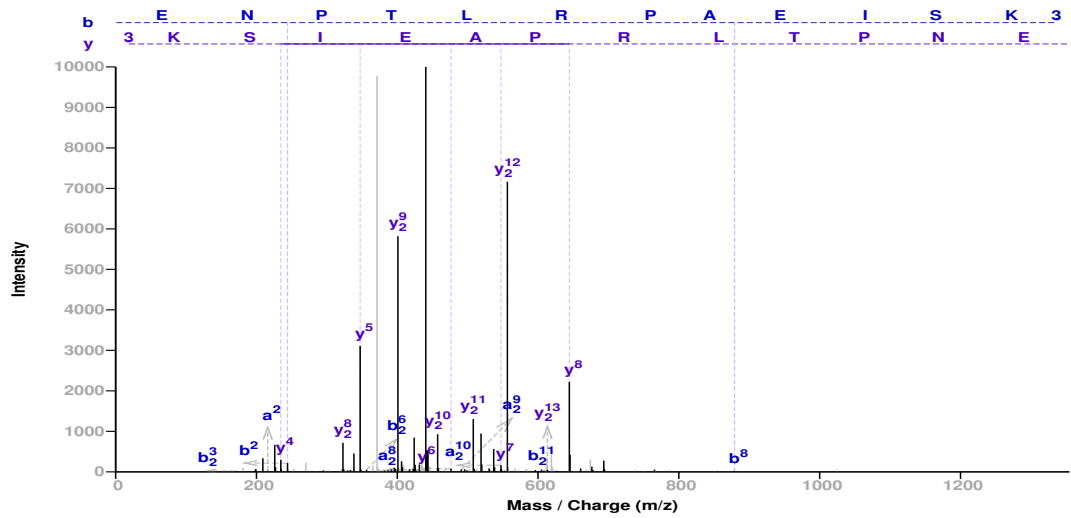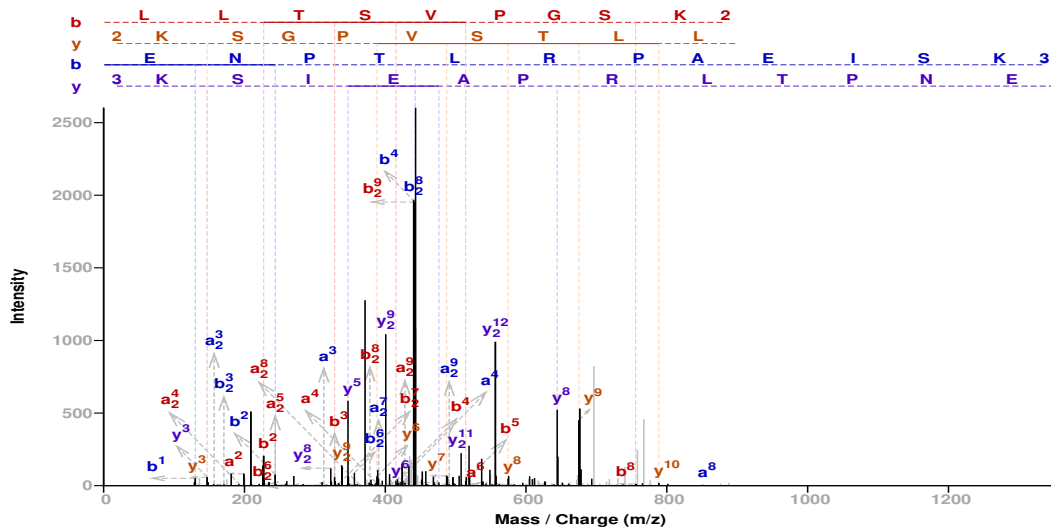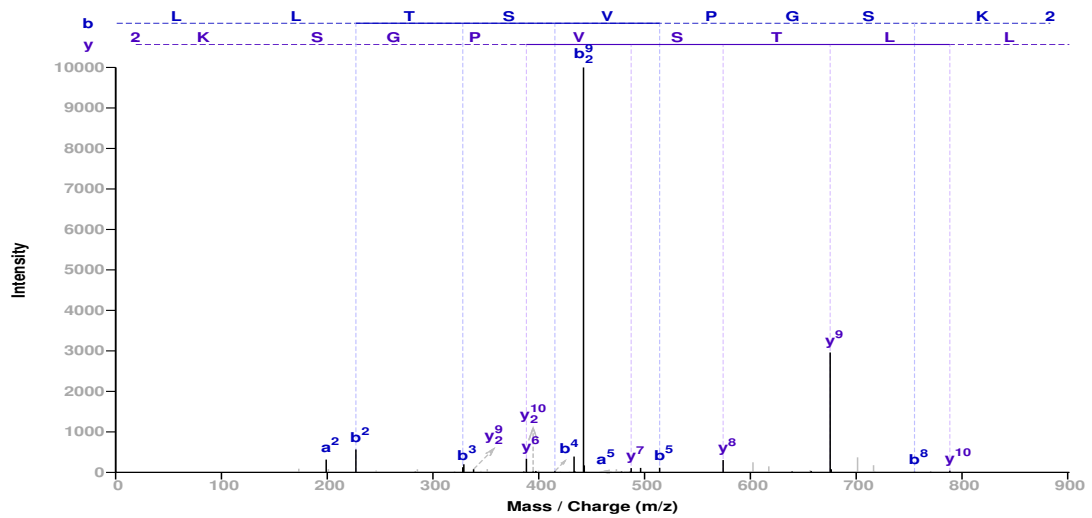

yeast1\_Scan\_Number\_4483 Precursor m/z: 540.271 cosine: 0.739  $\alpha$ : 0.653

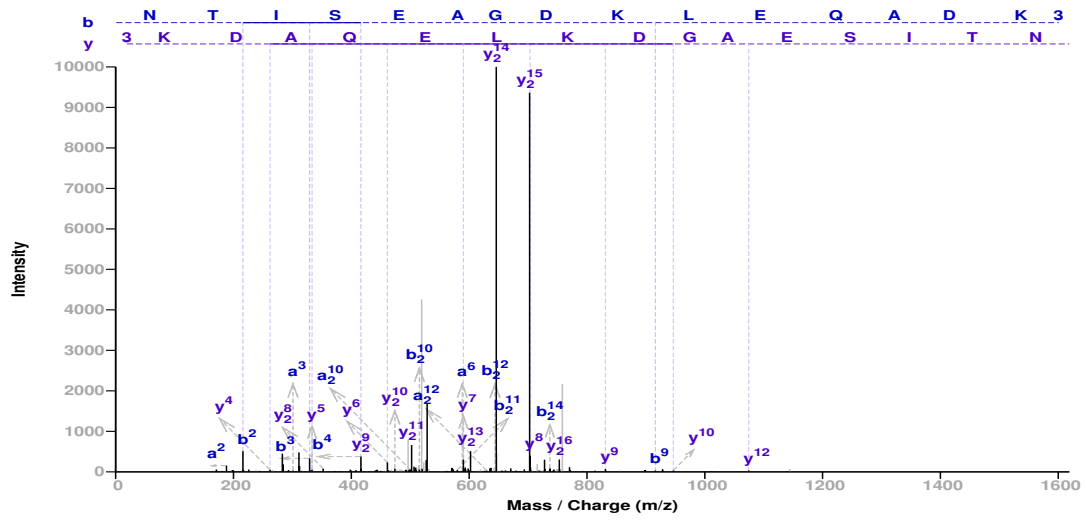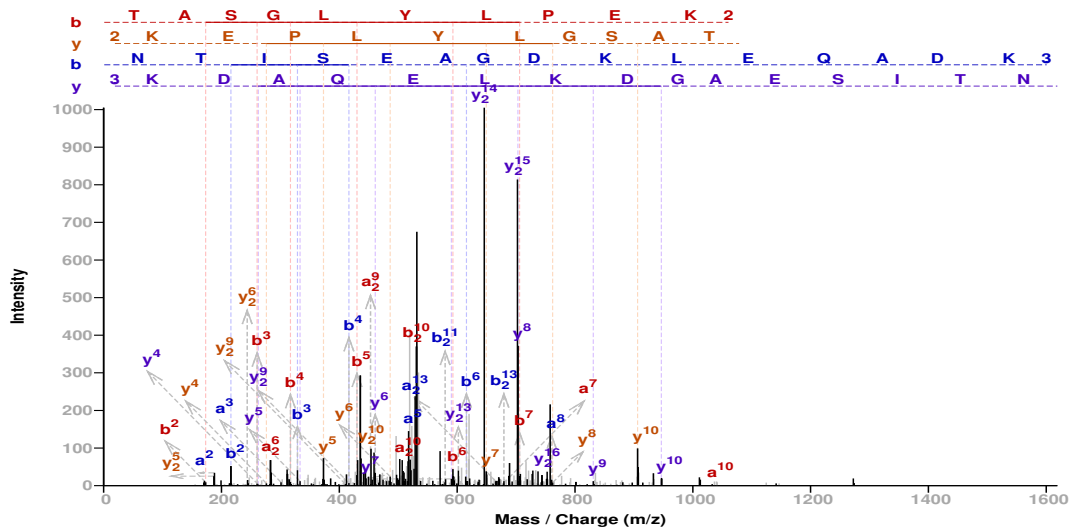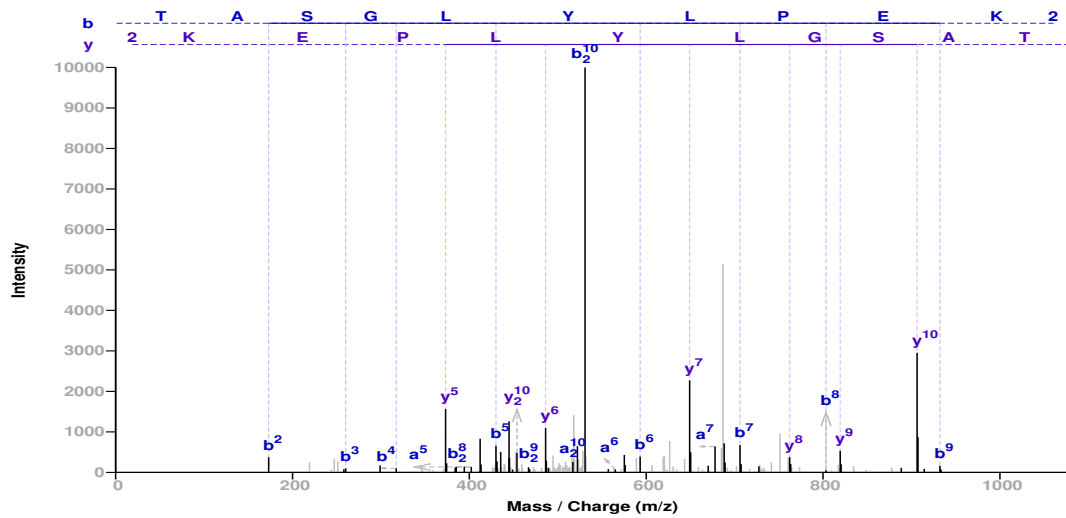

yeast1\_Scan\_Number\_3717 Precursor m/z: 454.569 cosine: 0.774  $\alpha$ : 0.653

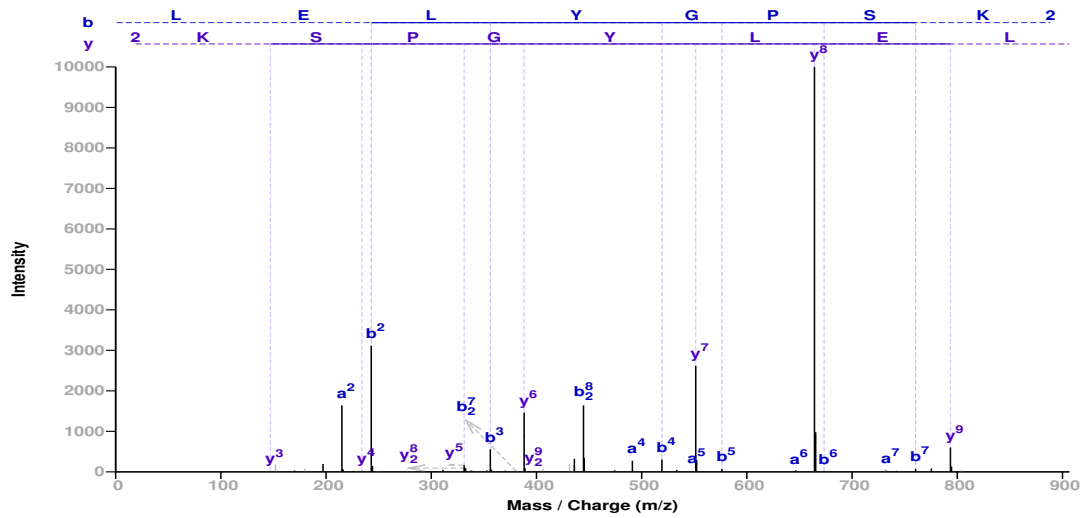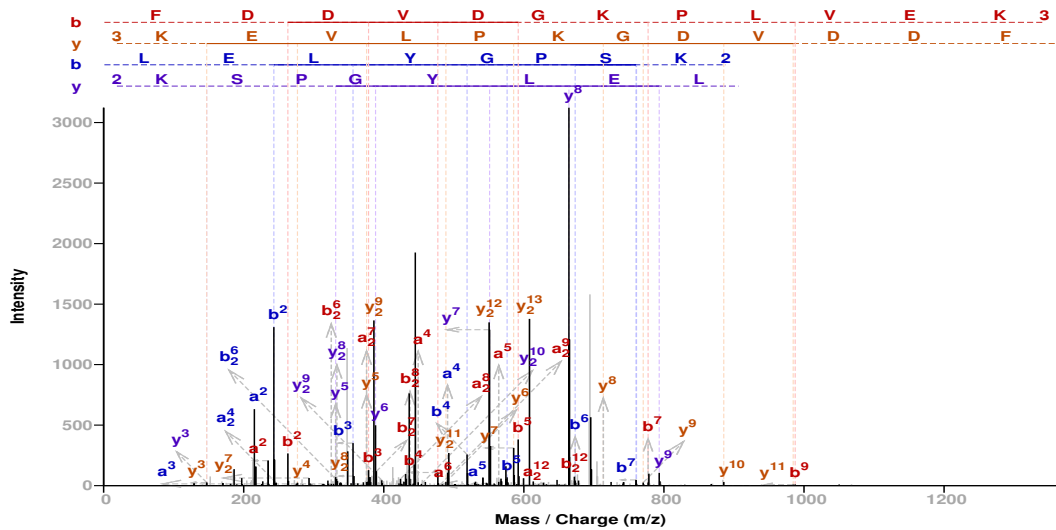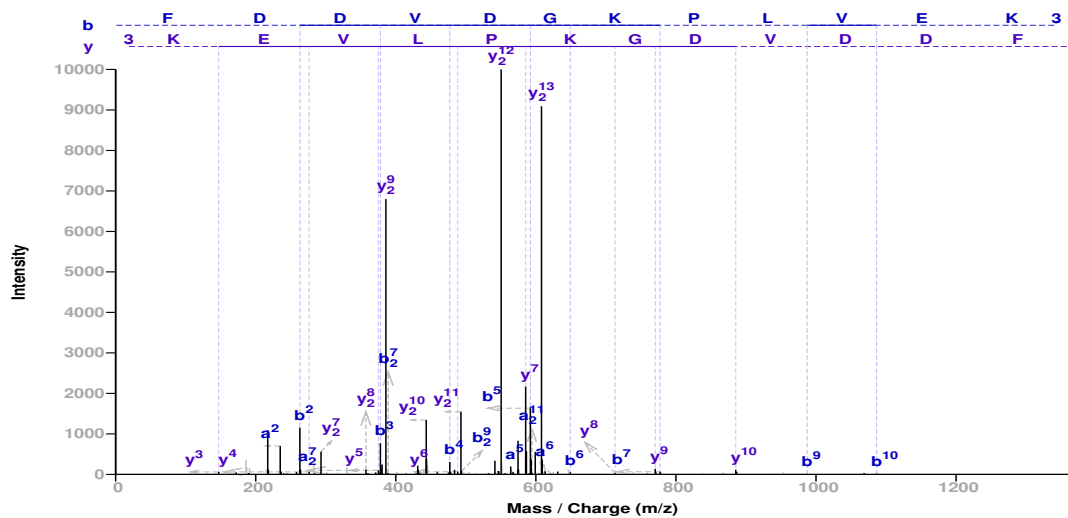

yeast1\_Scan\_Number\_386 Precursor m/z: 520.264 cosine: 0.888  $\alpha$ : 0.648

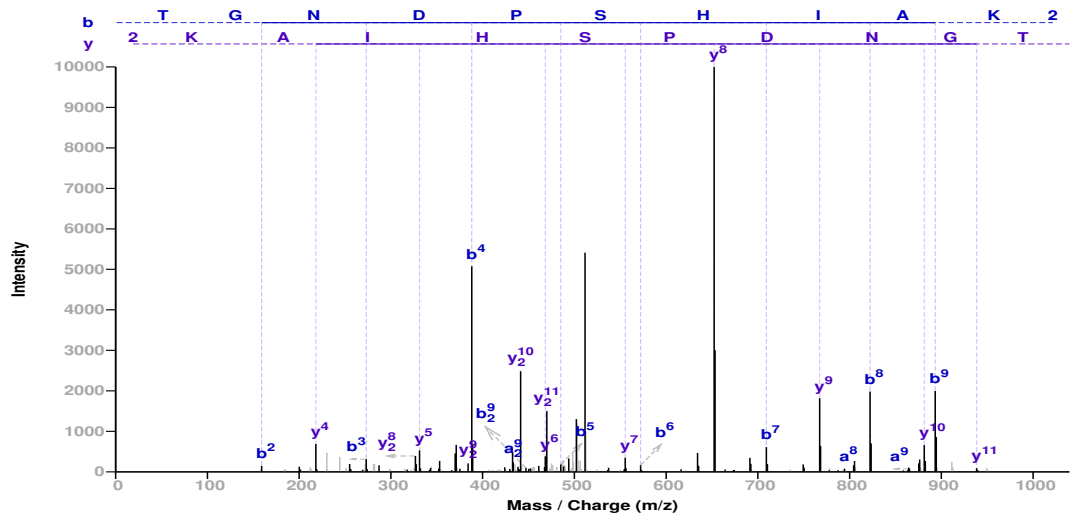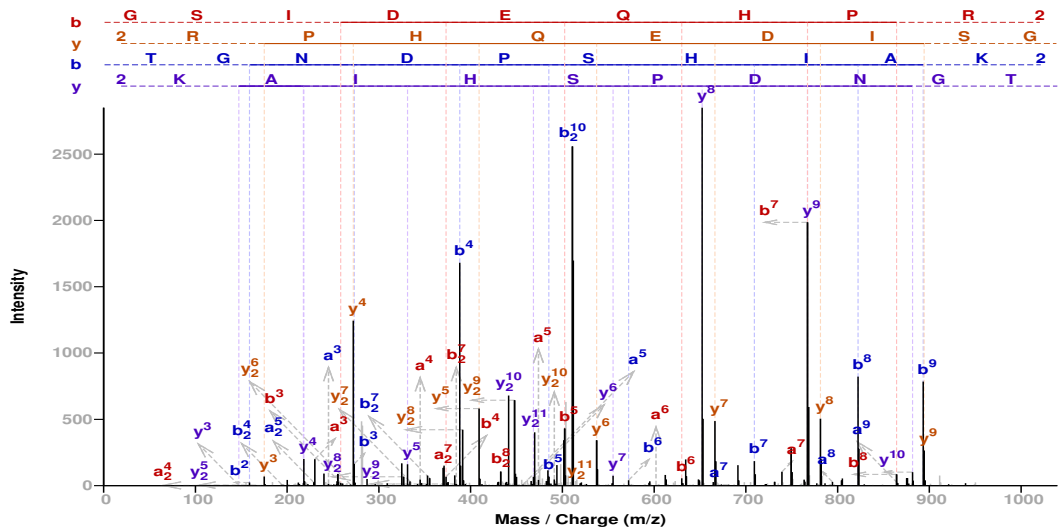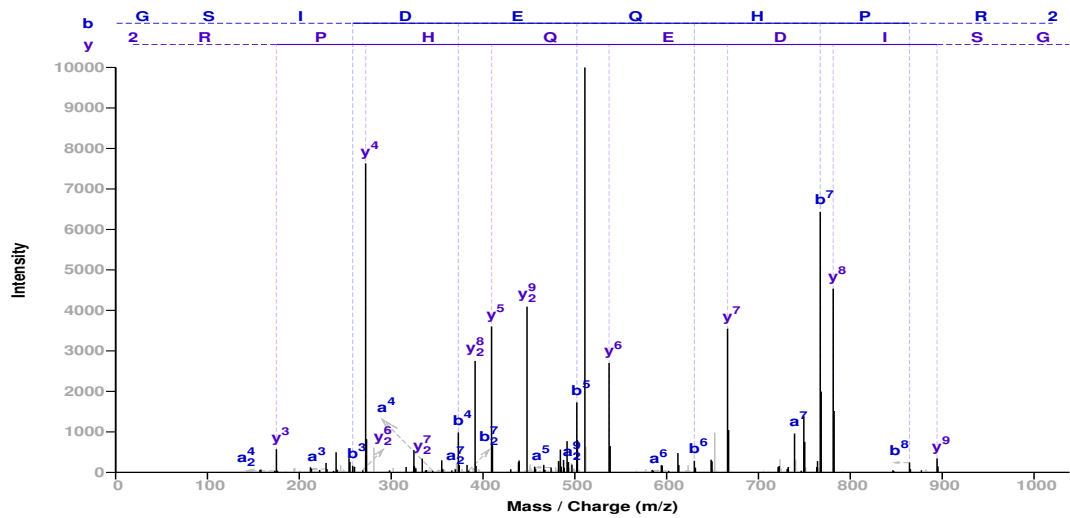

yeast1\_Scan\_Number\_3963 Precursor m/z: 714.848 cosine: 0.719  $\alpha$ : 0.646

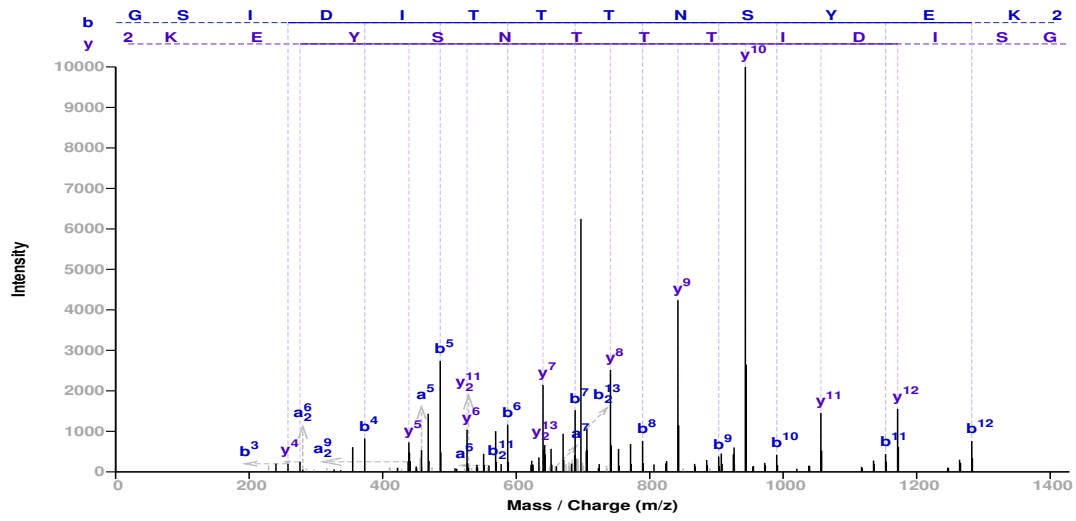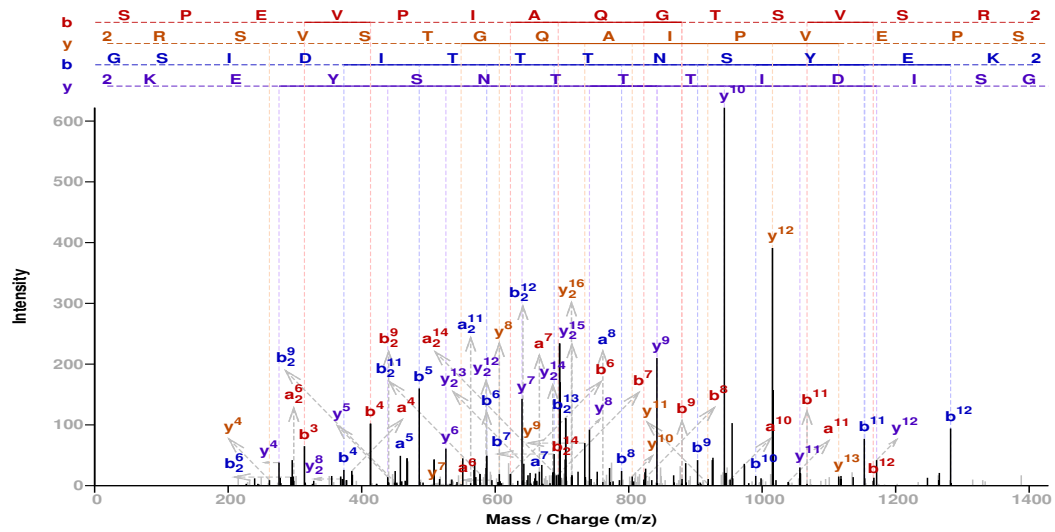

yeast1\_Scan\_Number\_7905 Precursor m/z: 691.862 cosine: 0.780  $\alpha$ : 0.627

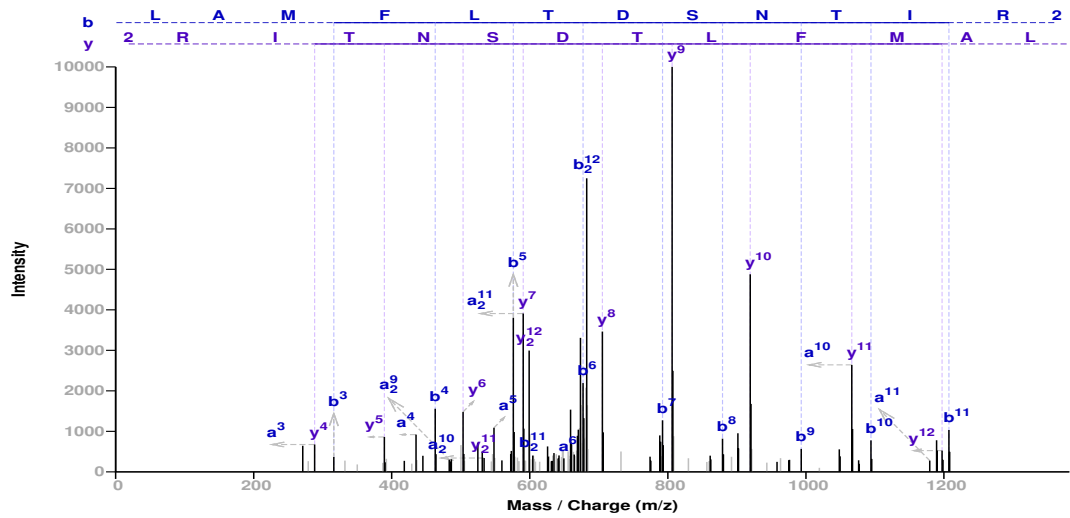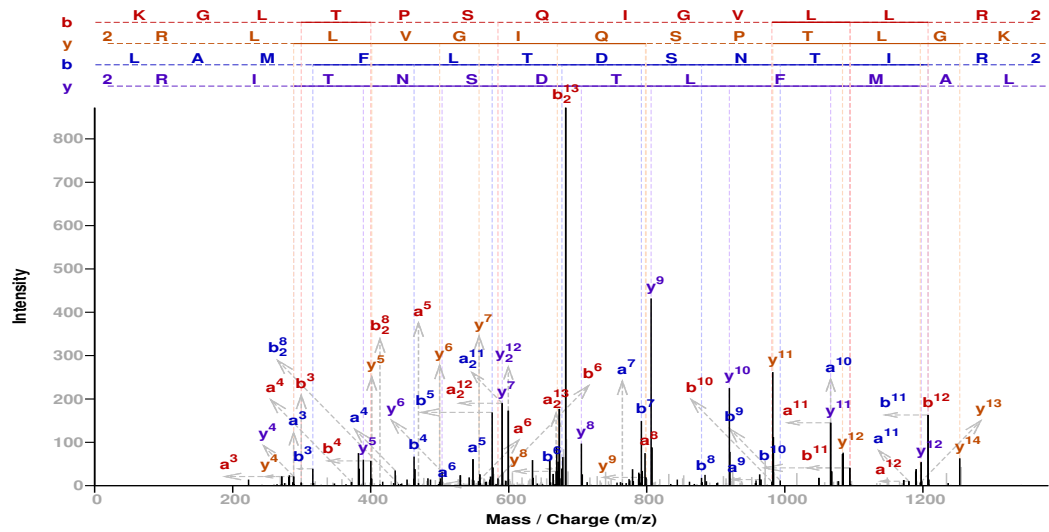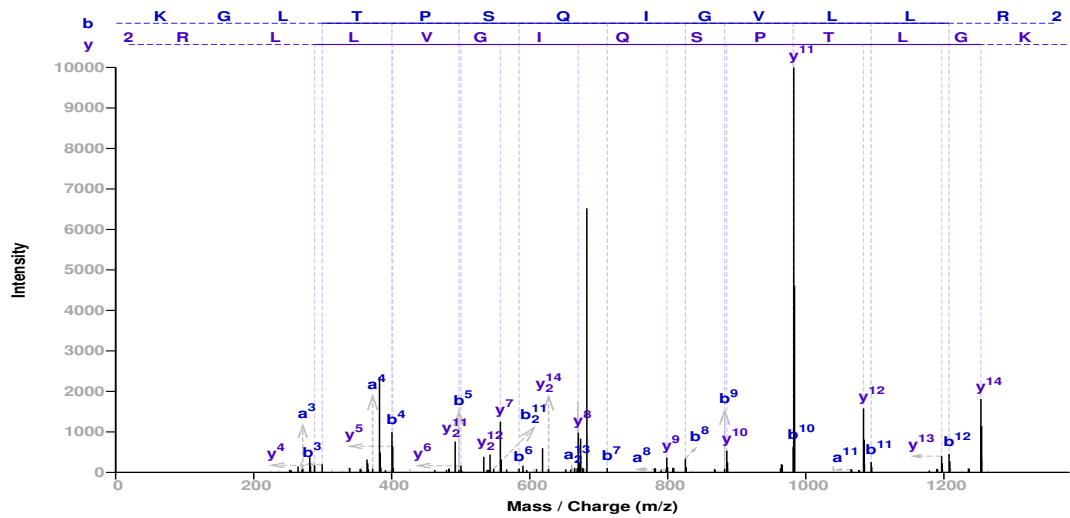



yeast1\_Scan\_Number\_1687 Precursor m/z: 502.760 cosine: 0.773  $\alpha$ : 0.625

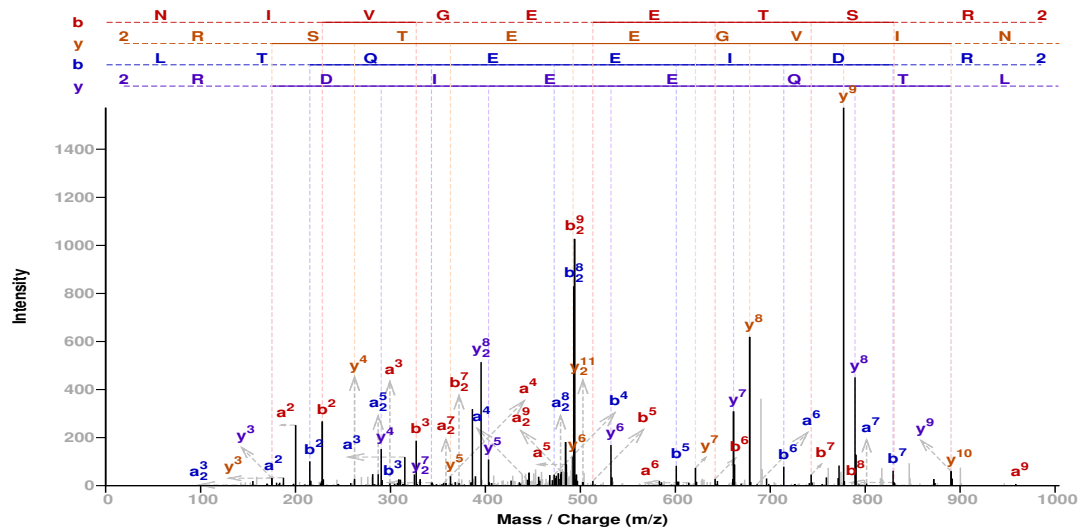

yeast1\_Scan\_Number\_3493 Precursor m/z: 531.758 cosine: 0.896  $\alpha$ : 0.609

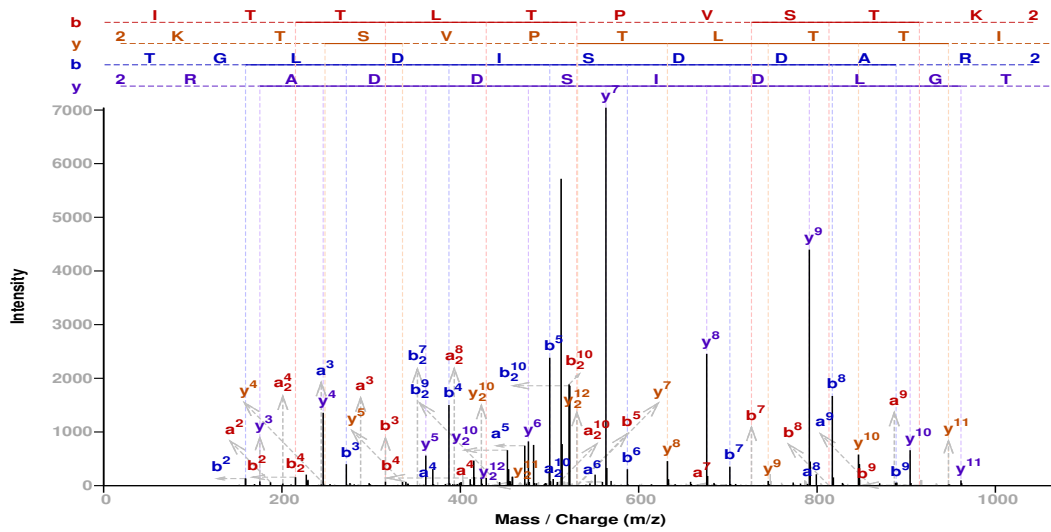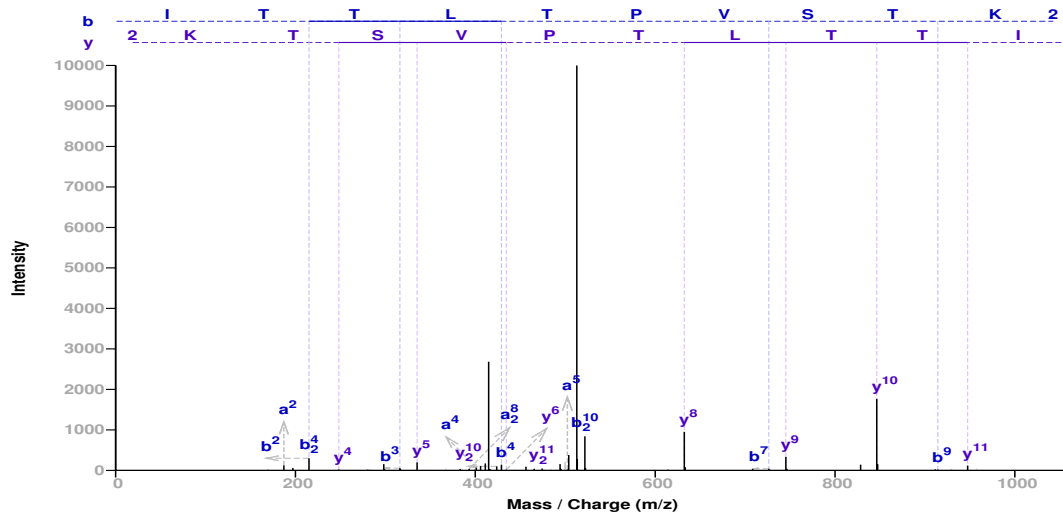

yeast1\_Scan\_Number\_817 Precursor m/z: 574.285 cosine: 0.741  $\alpha$ : 0.607

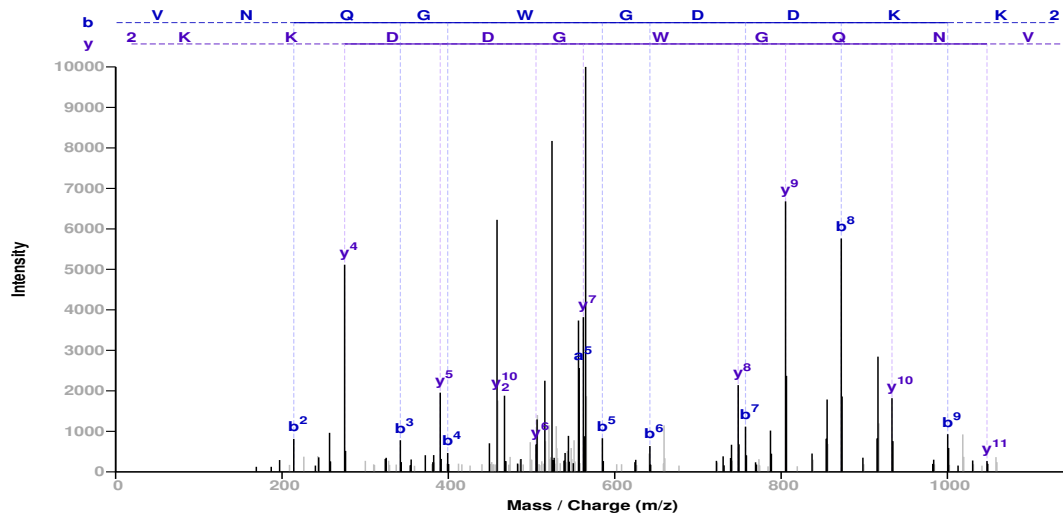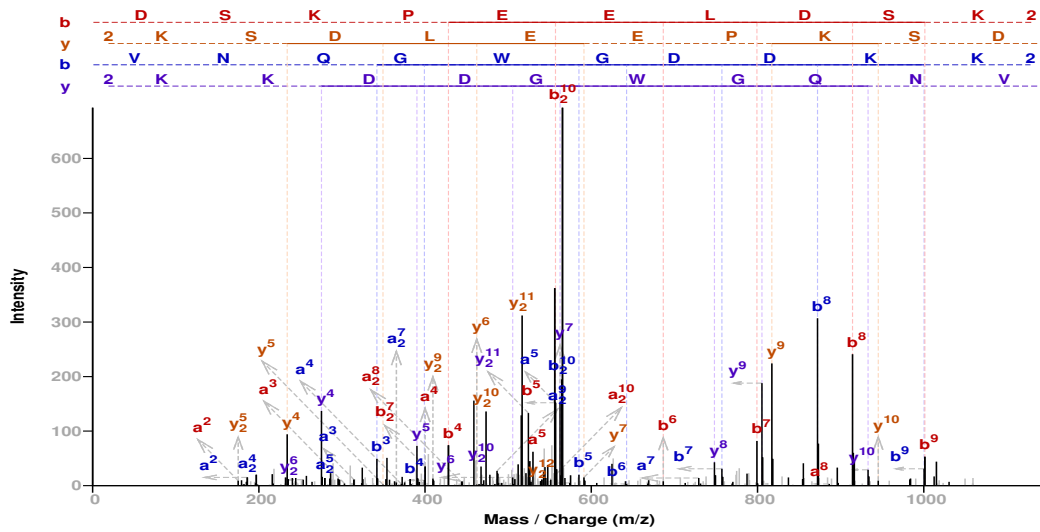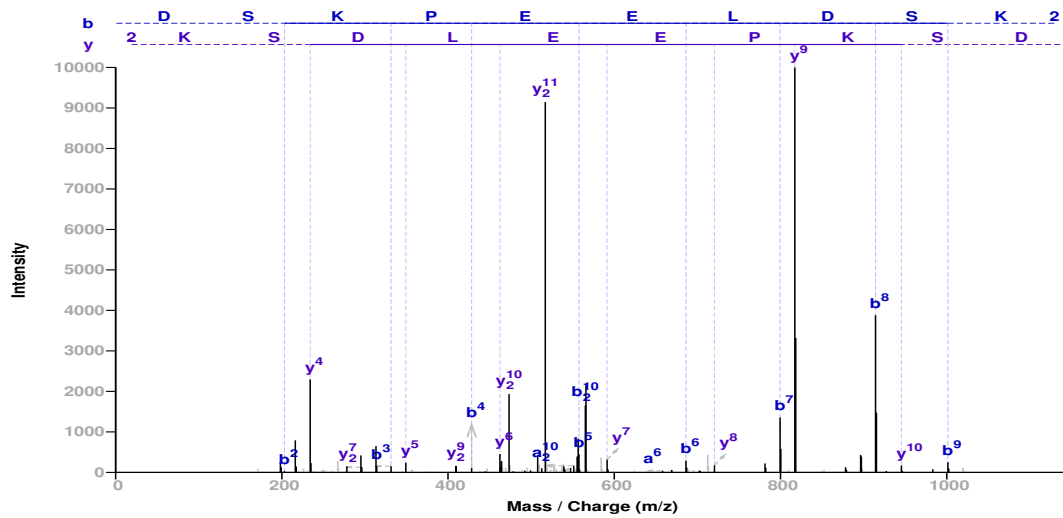

yeast1\_Scan\_Number\_2209 Precursor m/z: 566.954 cosine: 0.815  $\alpha$ : 0.600

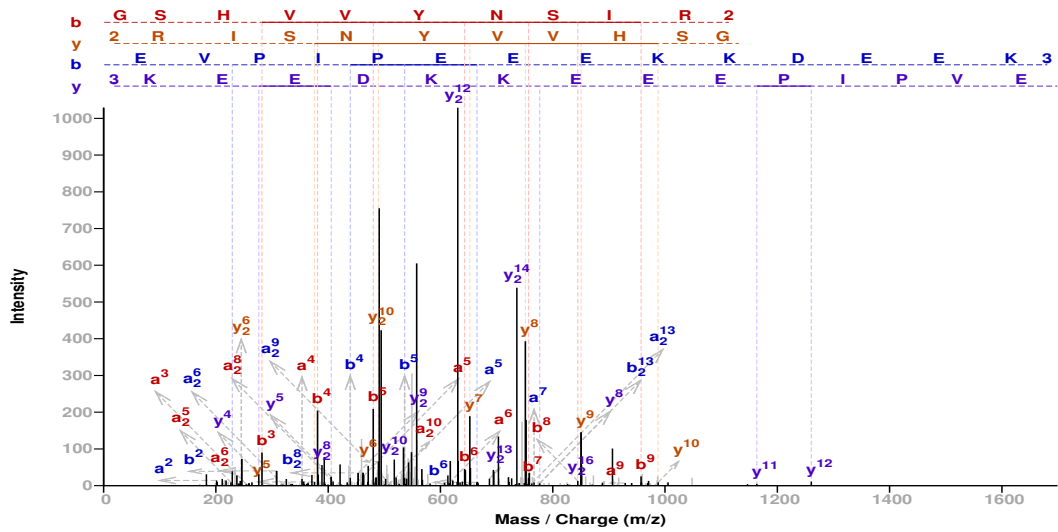

yeast1\_Scan\_Number\_5448 Precursor m/z: 799.909 cosine: 0.862  $\alpha$ : 0.594

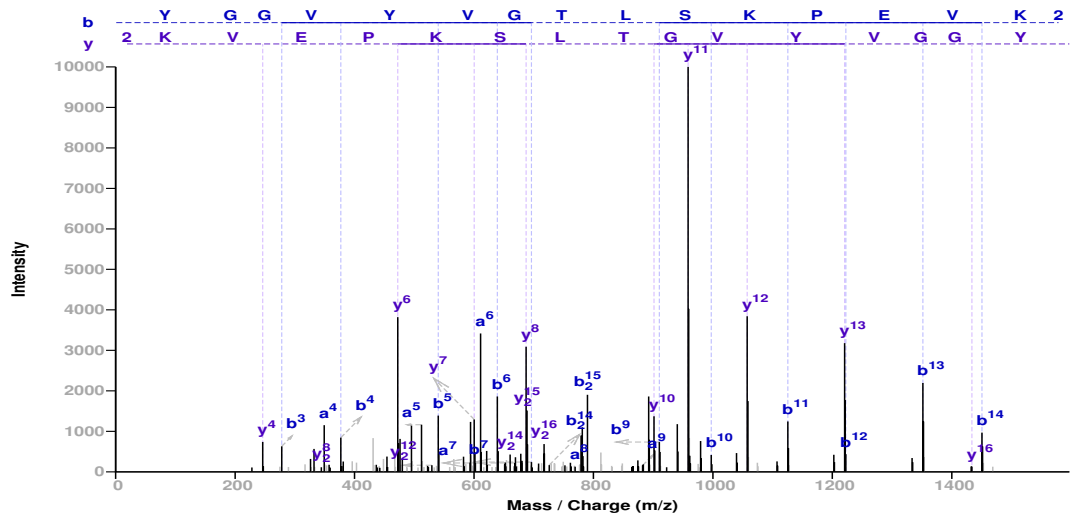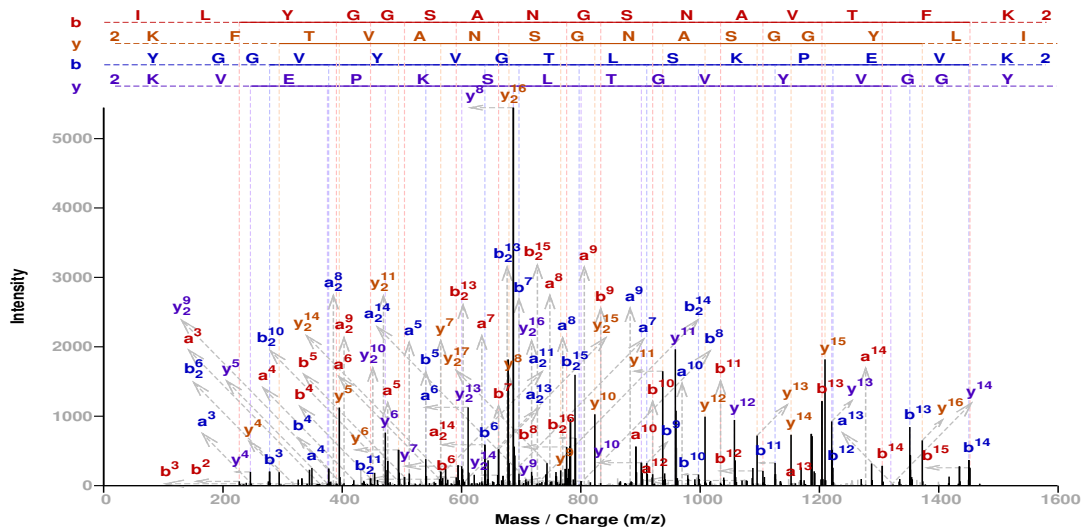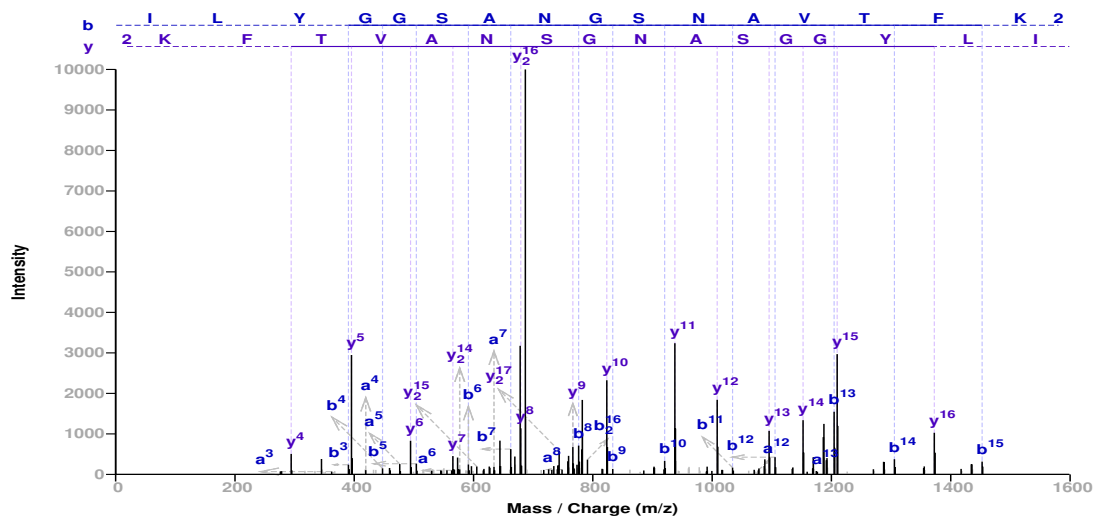

yeast1\_Scan\_Number\_3695 Precursor m/z: 450.269 cosine: 0.854  $\alpha$ : 0.592

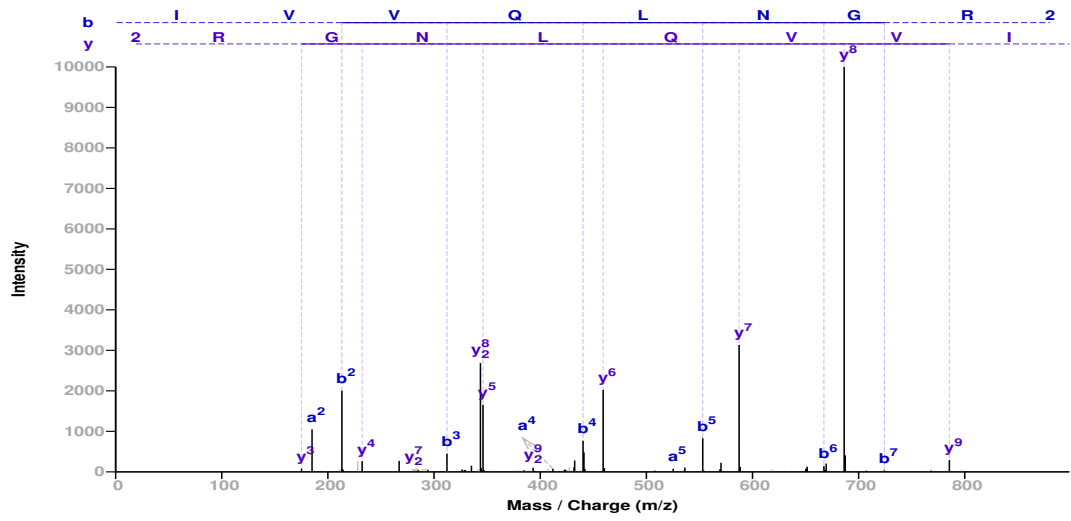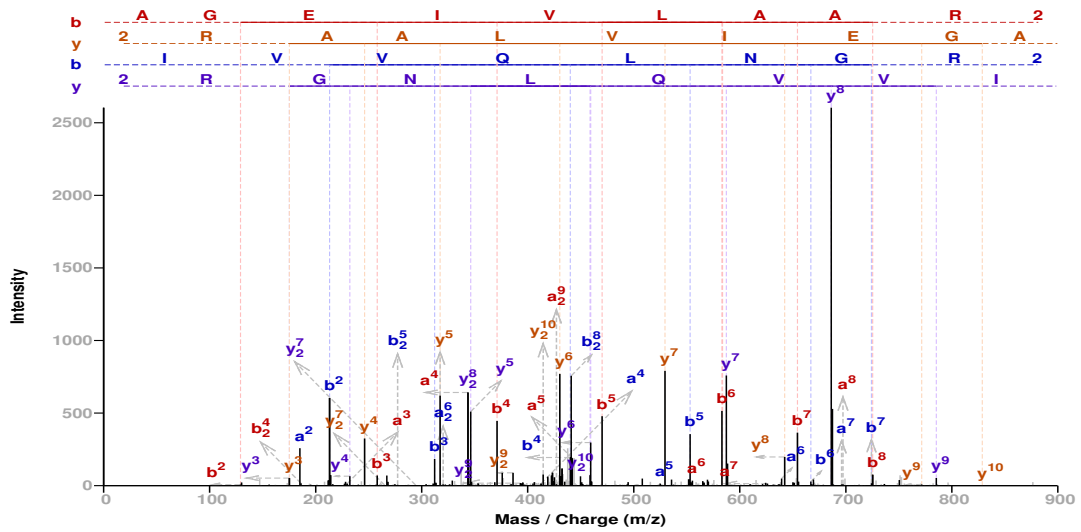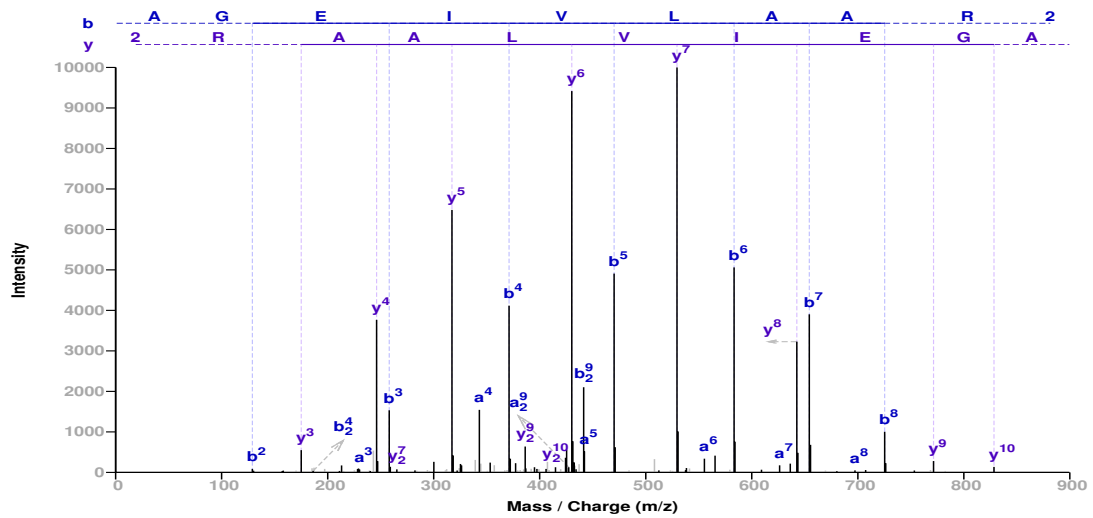

yeast1\_Scan\_Number\_7468 Precursor m/z: 651.368 cosine: 0.872  $\alpha$ : 0.579

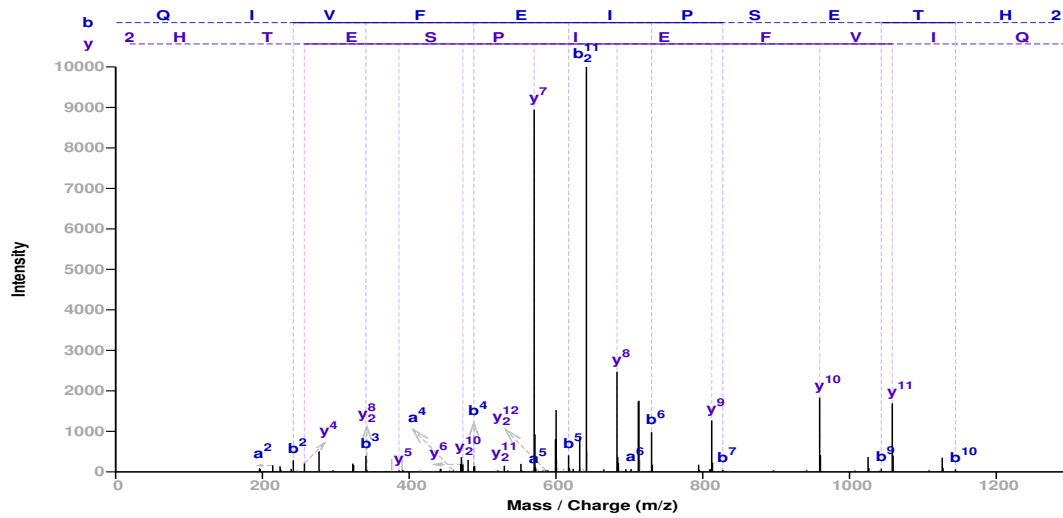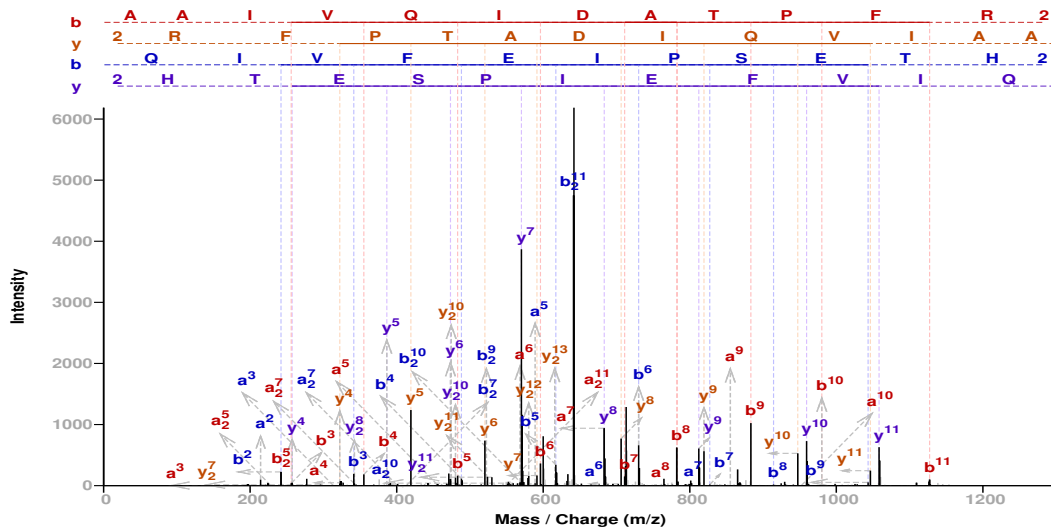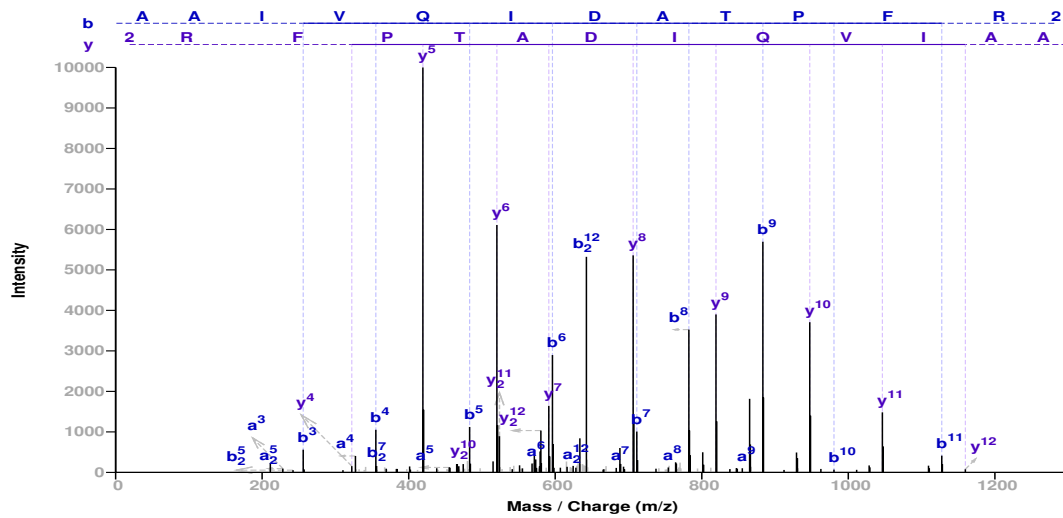

yeast1\_Scan\_Number\_6138 Precursor m/z: 435.285 cosine: 0.802  $\alpha$ : 0.575

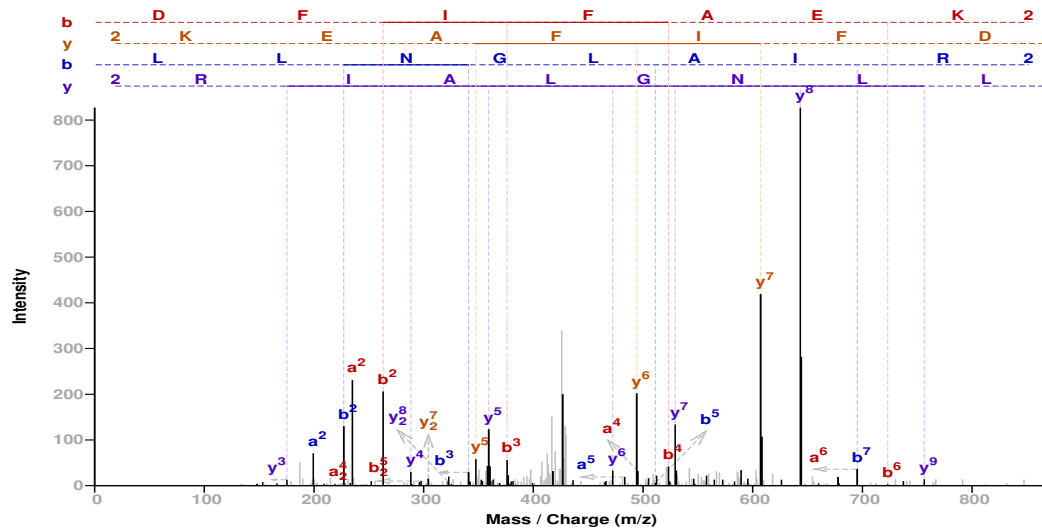



yeast1\_Scan\_Number\_4799 Precursor m/z: 435.303 cosine: 0.758  $\alpha$ : 0.574

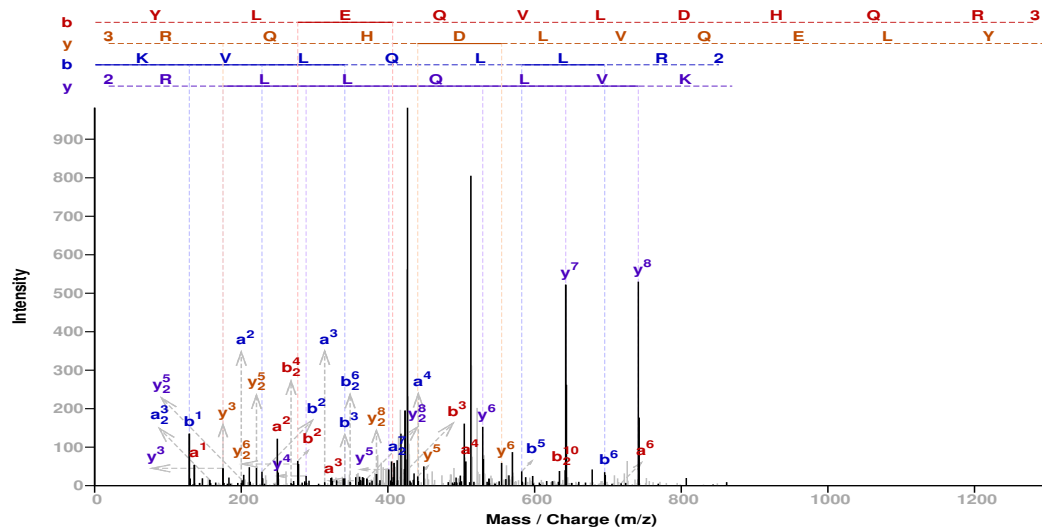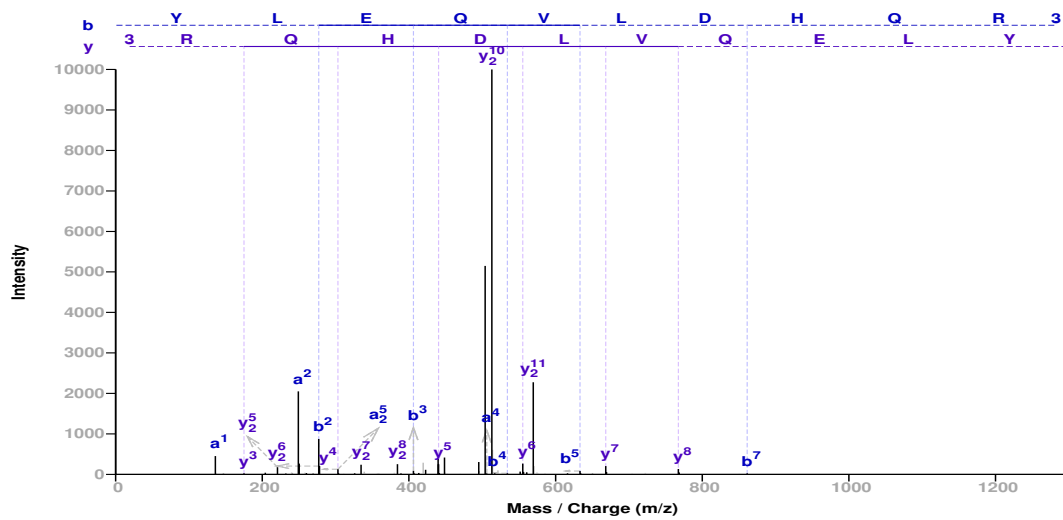

yeast1\_Scan\_Number\_1783 Precursor m/z: 480.272 cosine: 0.759  $\alpha$ : 0.571

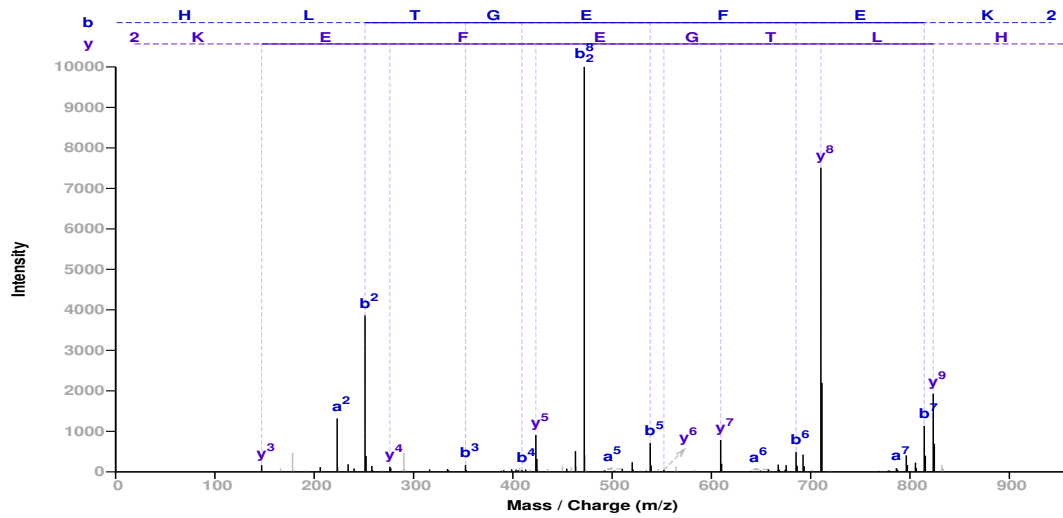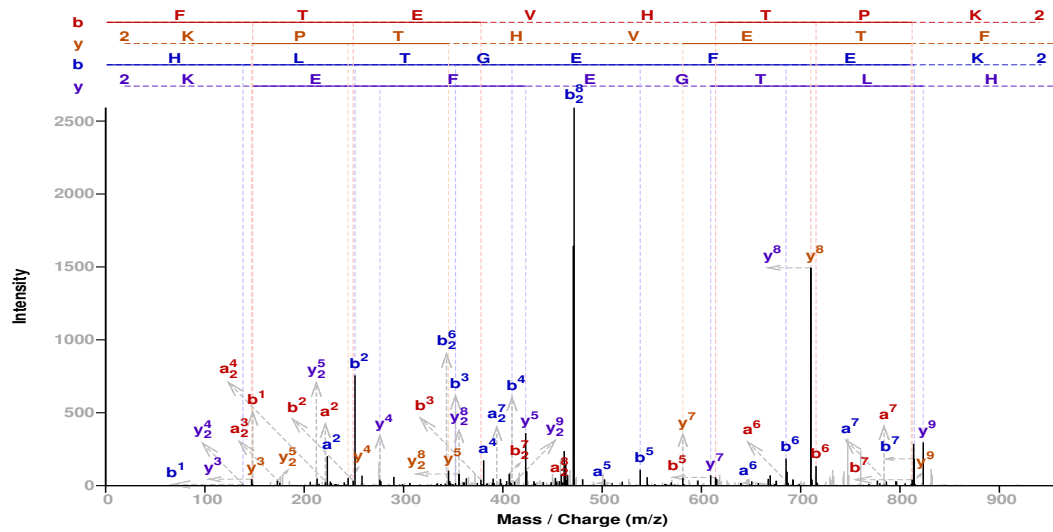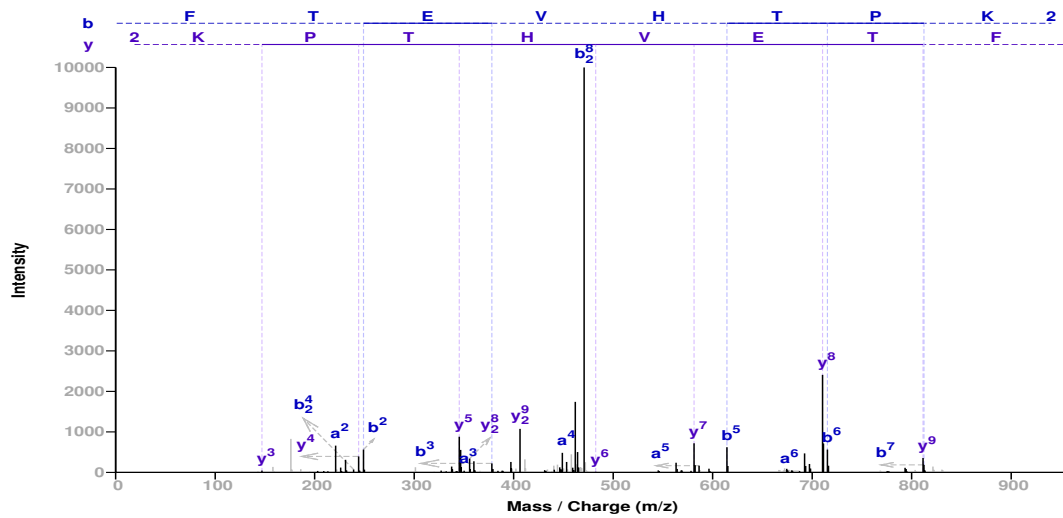



yeast1\_Scan\_Number\_6065 Precursor m/z: 529.816 cosine: 0.758  $\alpha$ : 0.563

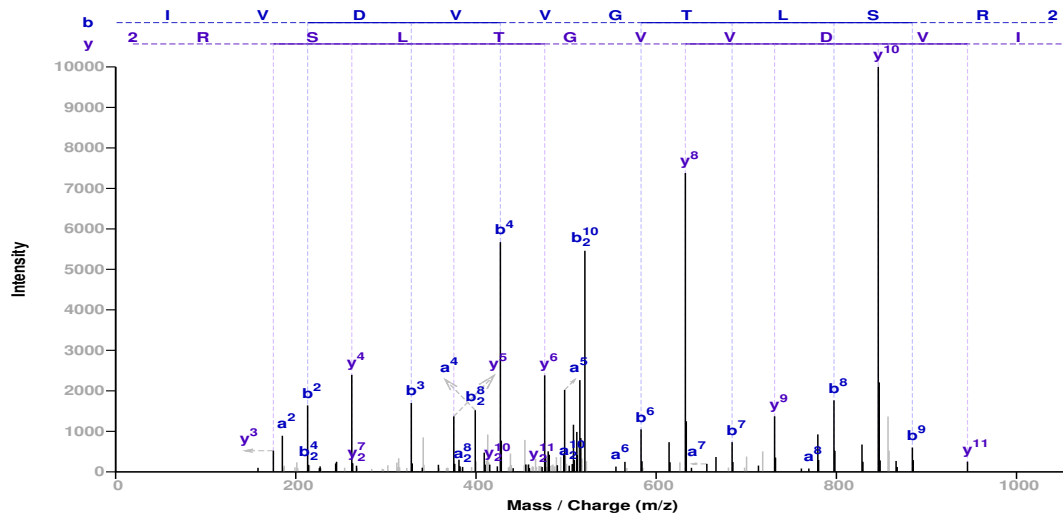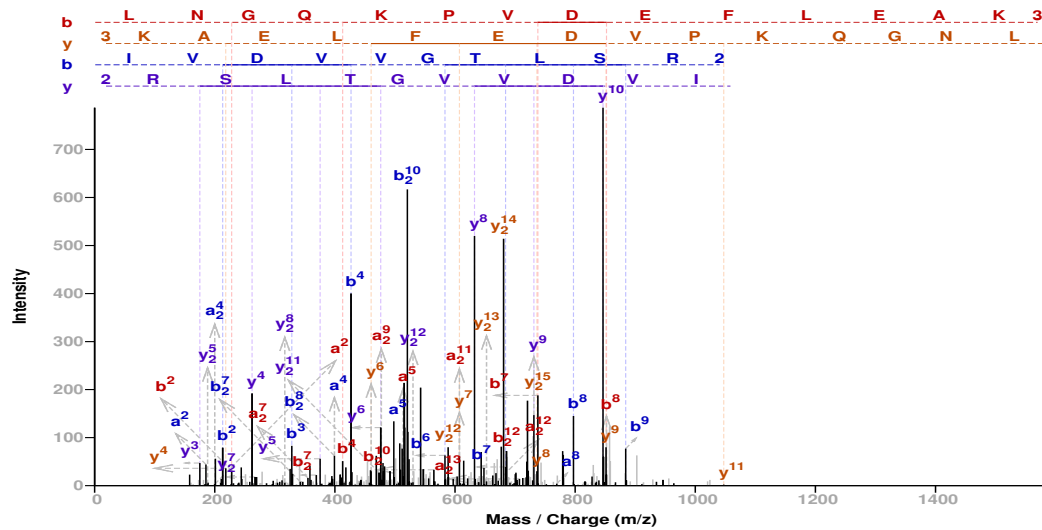

yeast1\_Scan\_Number\_4391 Precursor m/z: 568.610 cosine: 0.744  $\alpha$ : 0.530

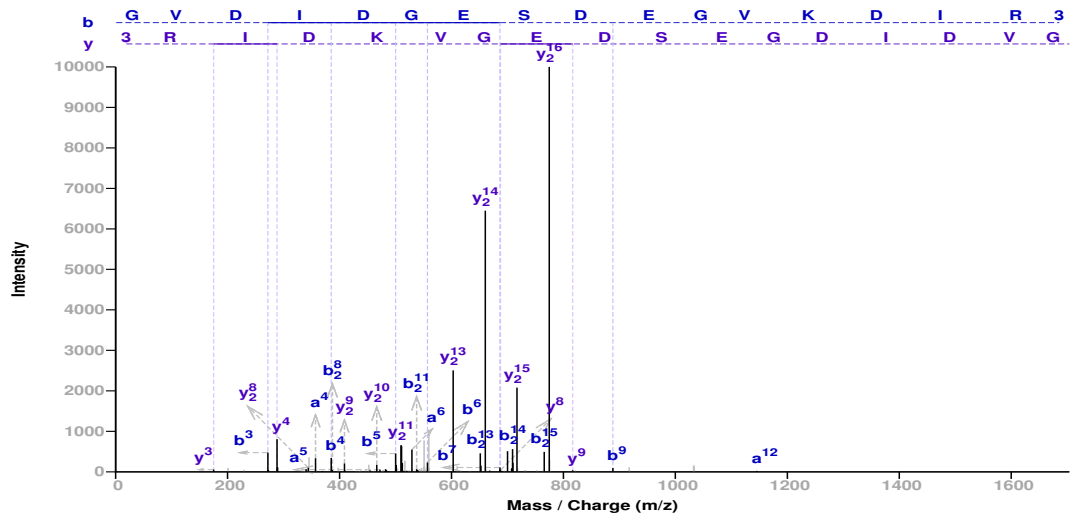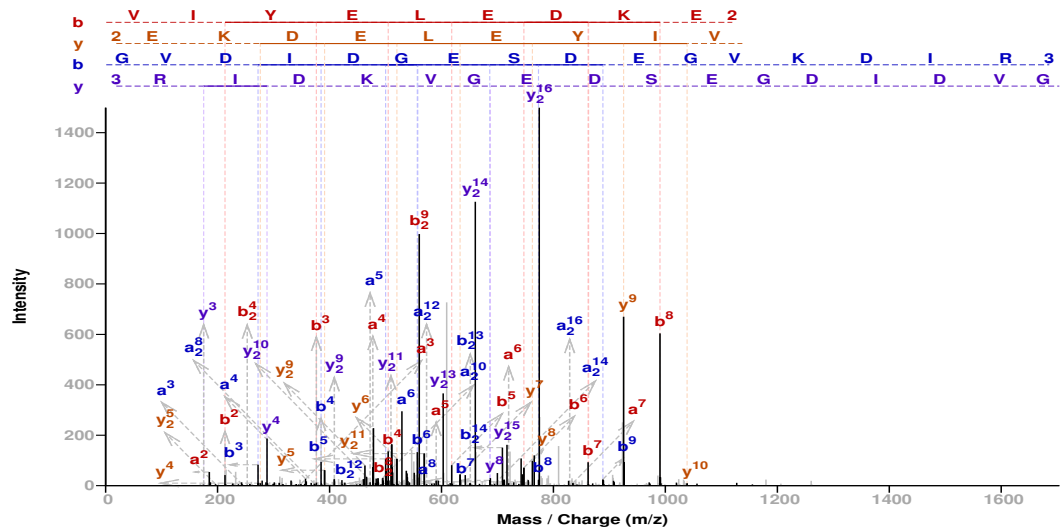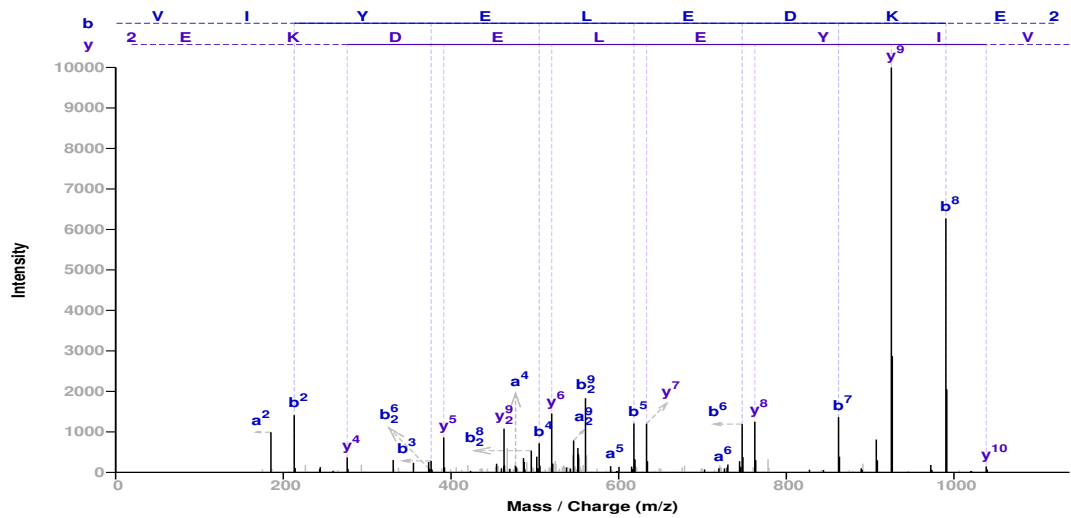

yeast1\_Scan\_Number\_737 Precursor m/z: 481.288 cosine: 0.778  $\alpha$ : 0.518

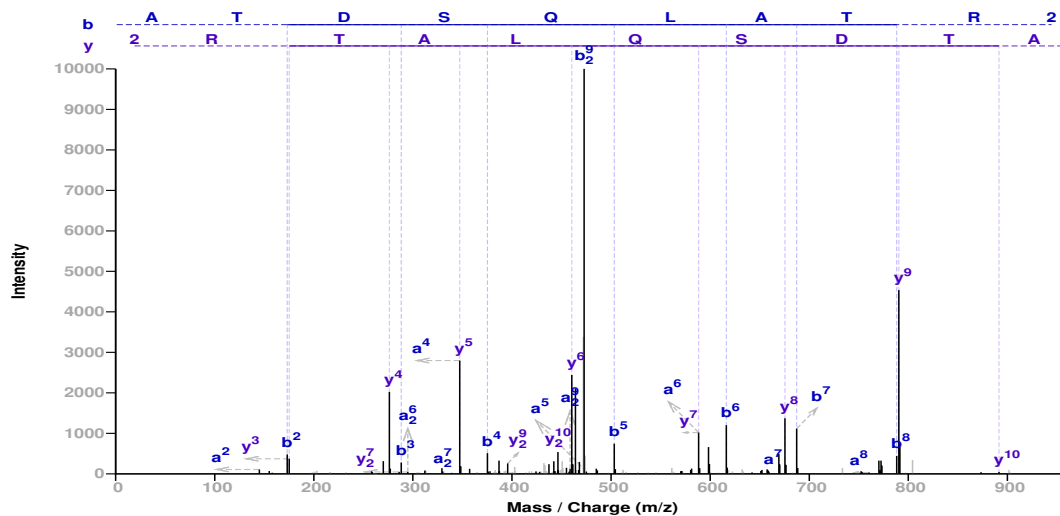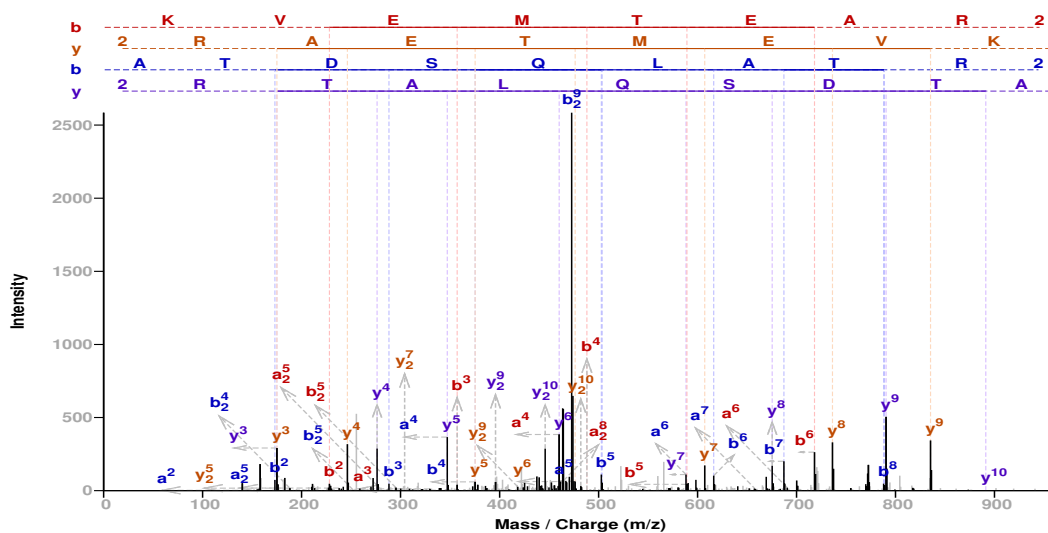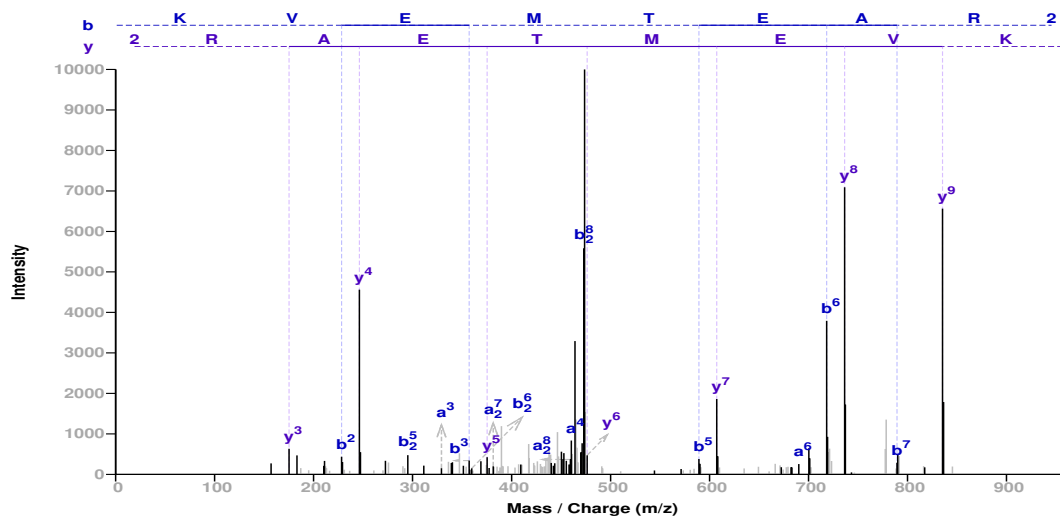

yeast1\_Scan\_Number\_3413 Precursor m/z: 424.749 cosine: 0.927  $\alpha$ : 0.514

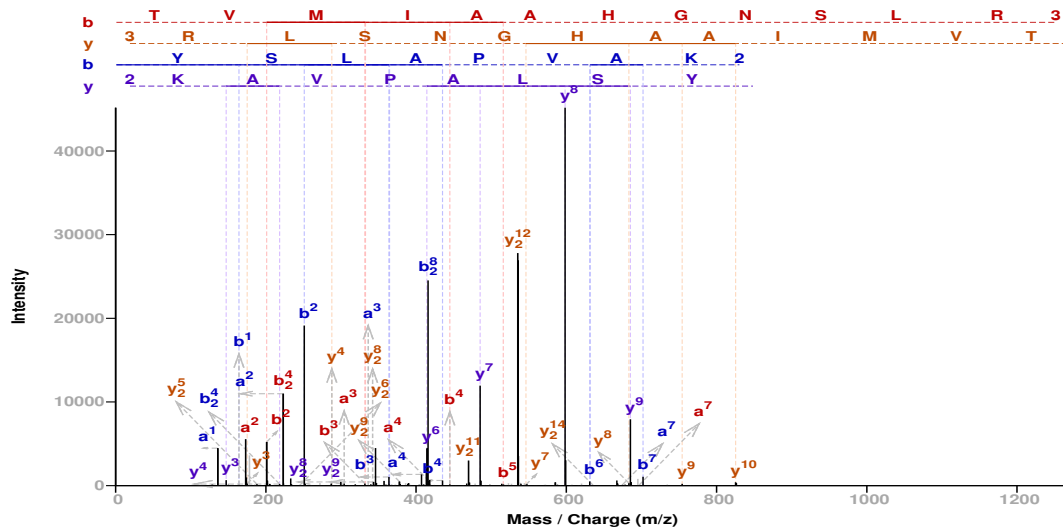

yeast1\_Scan\_Number\_2932 Precursor m/z: 343.235 cosine: 0.914  $\alpha$ : 0.513

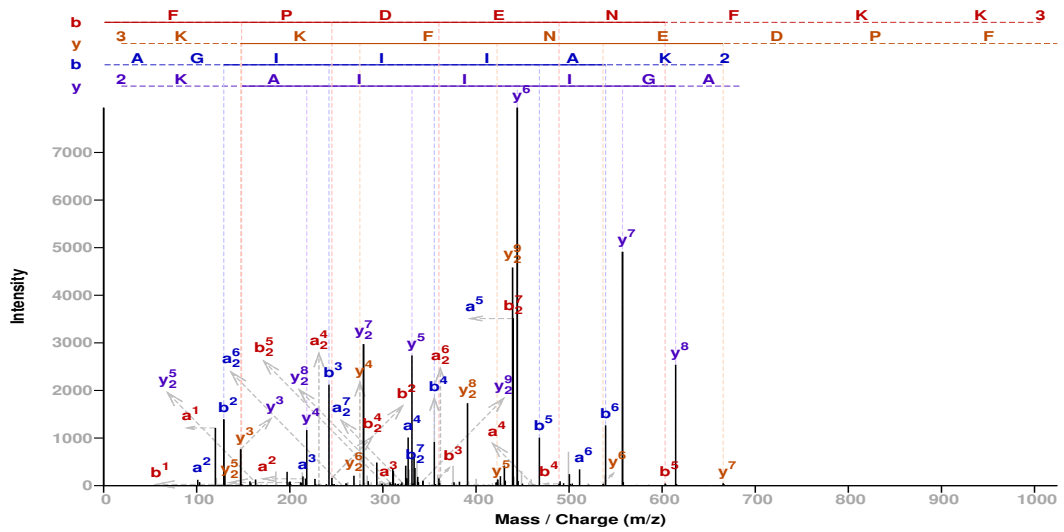



yeast1\_Scan\_Number\_2369 Precursor m/z: 568.287 cosine: 0.803  $\alpha$ : 0.510

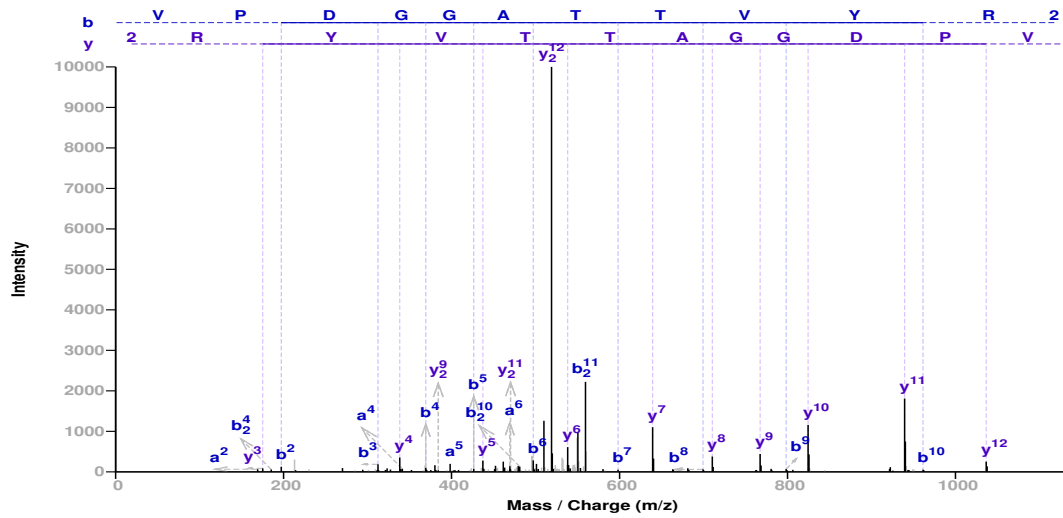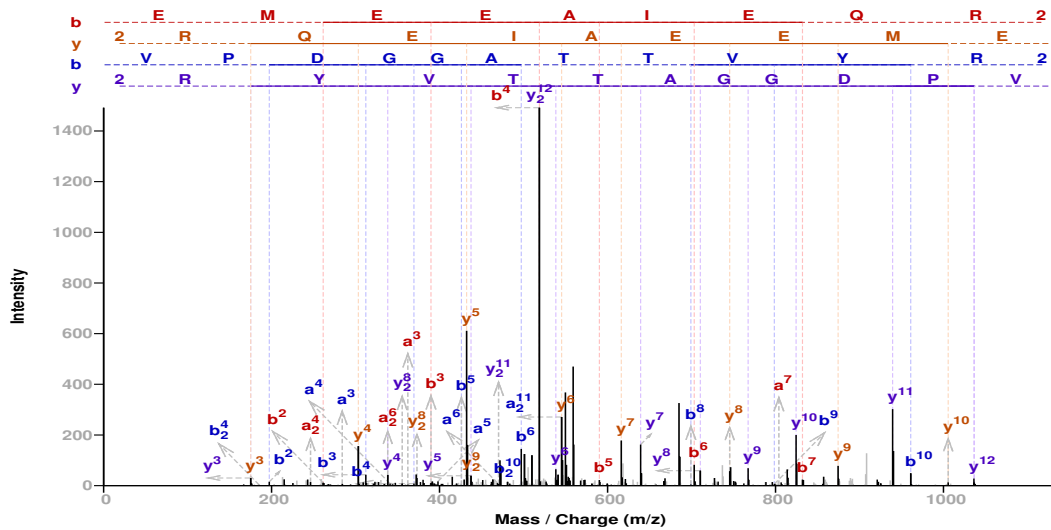

yeast1\_Scan\_Number\_3304 Precursor m/z: 378.742 cosine: 0.816  $\alpha$ : 0.497

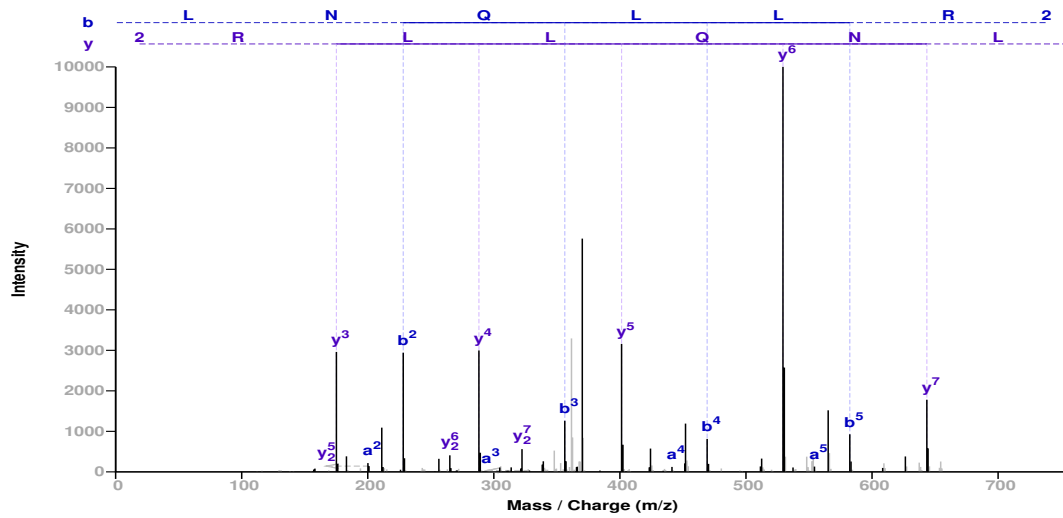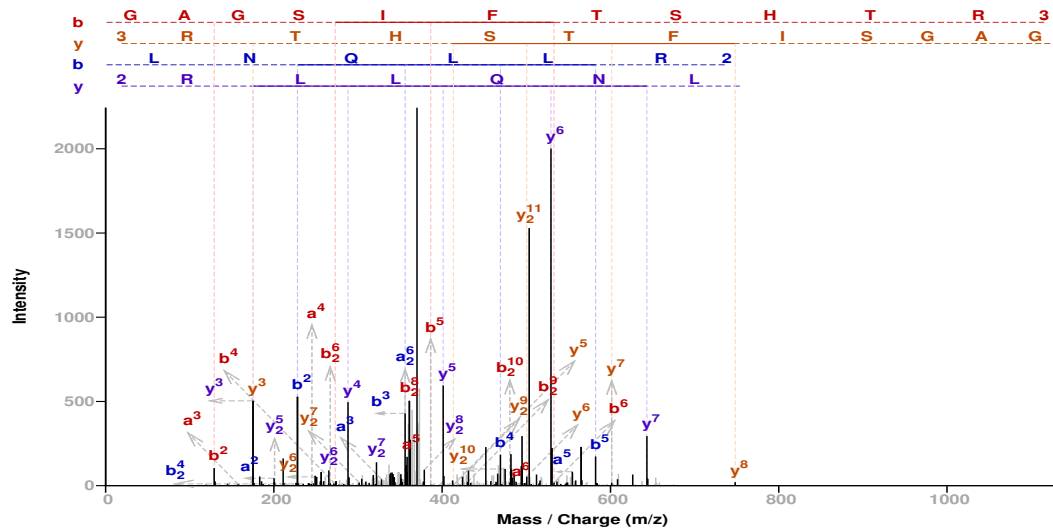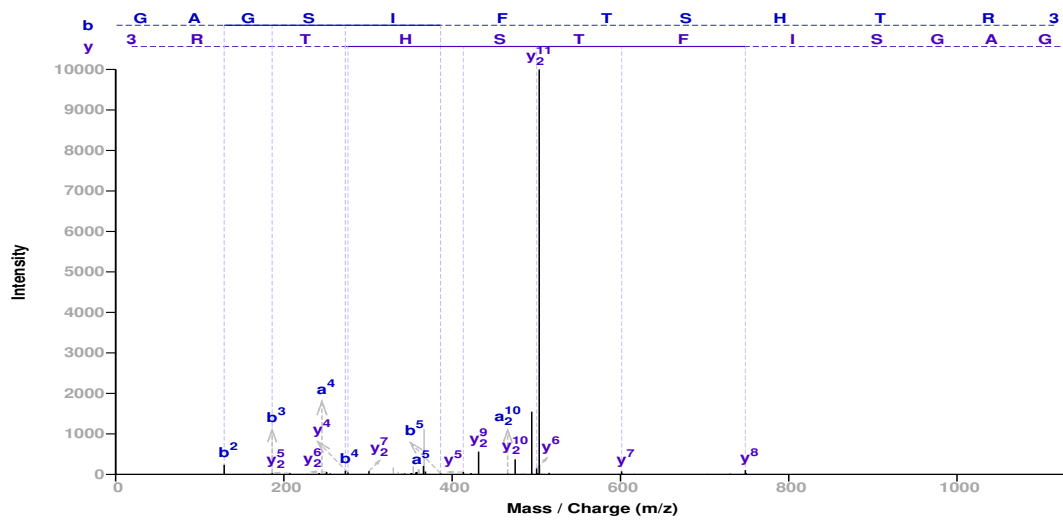

yeast1\_Scan\_Number\_6032 Precursor m/z: 404.240 cosine: 0.741  $\alpha$ : 0.496

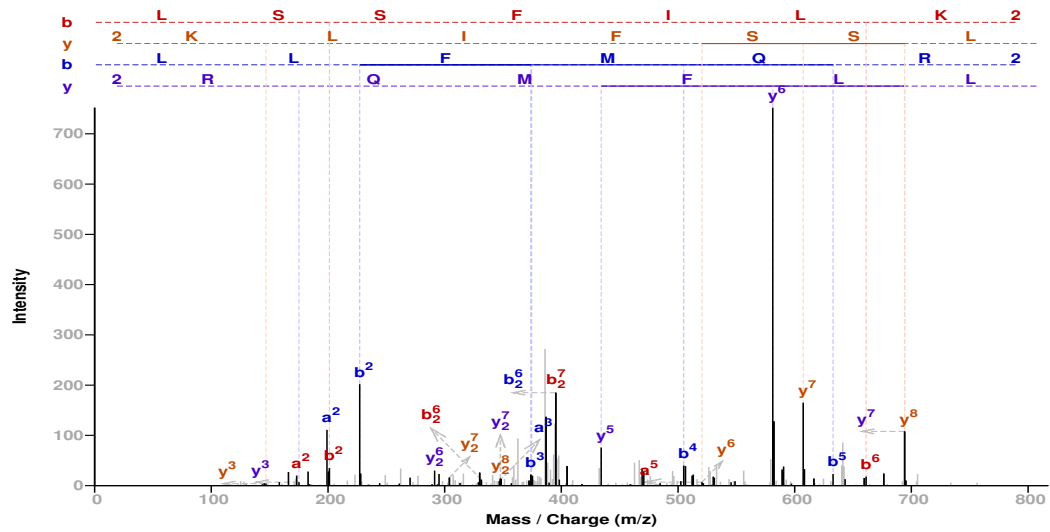

yeast1\_Scan\_Number\_4716 Precursor m/z: 541.281 cosine: 0.758  $\alpha$ : 0.491

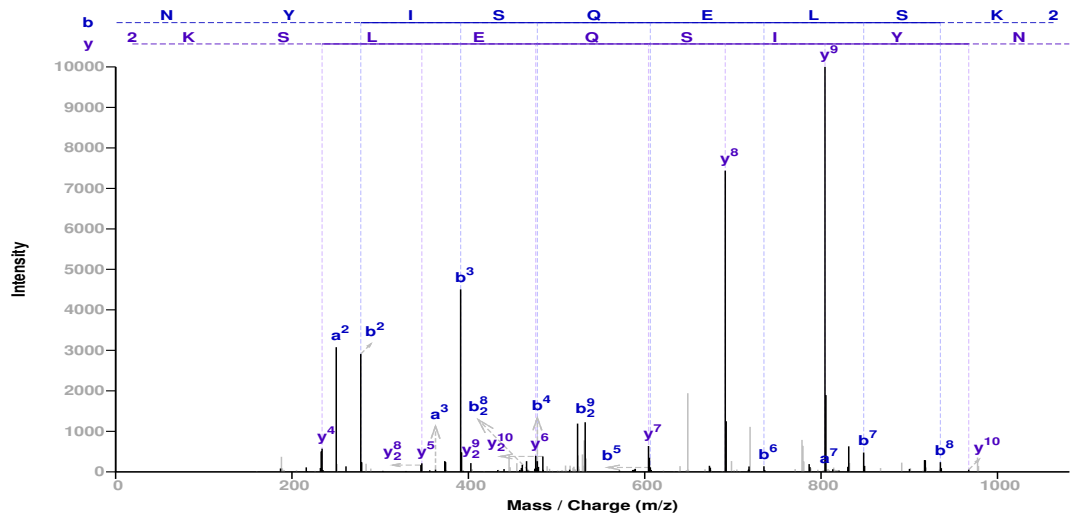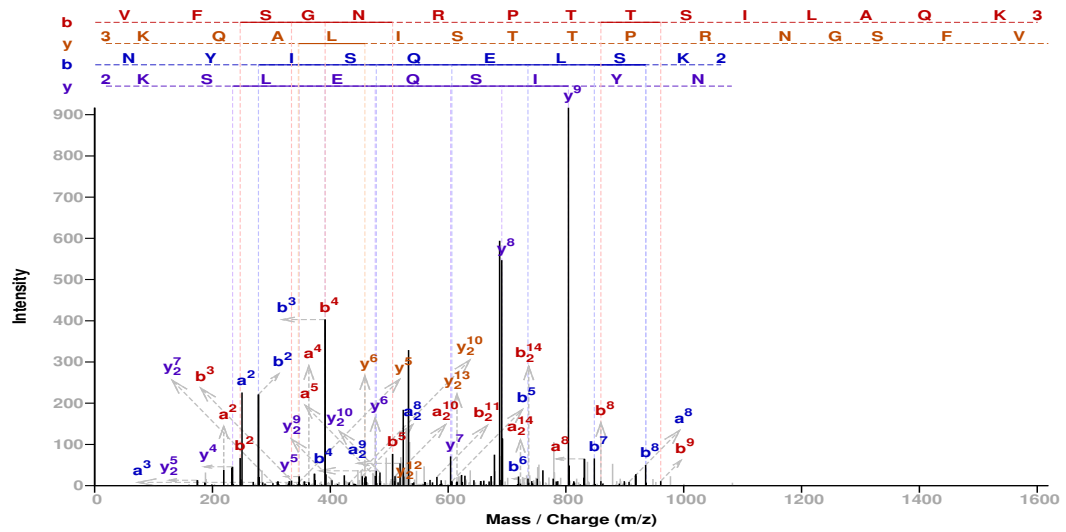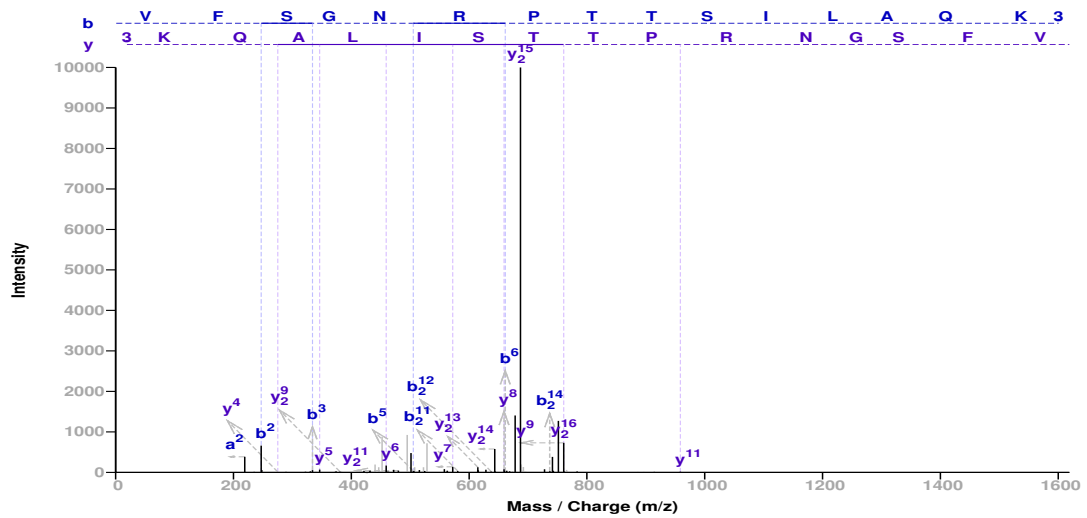

yeast1\_Scan\_Number\_3846 Precursor m/z: 430.245 cosine: 0.737  $\alpha$ : 0.485

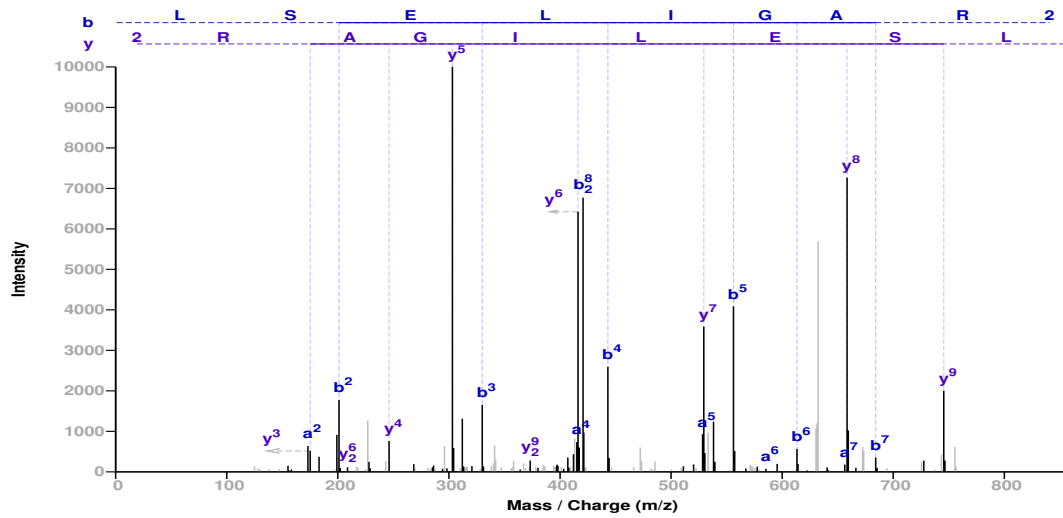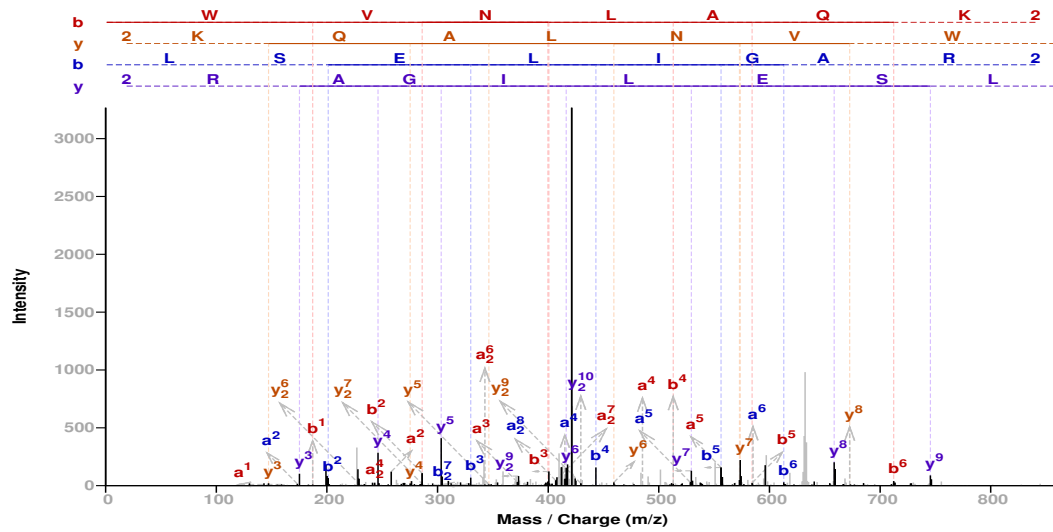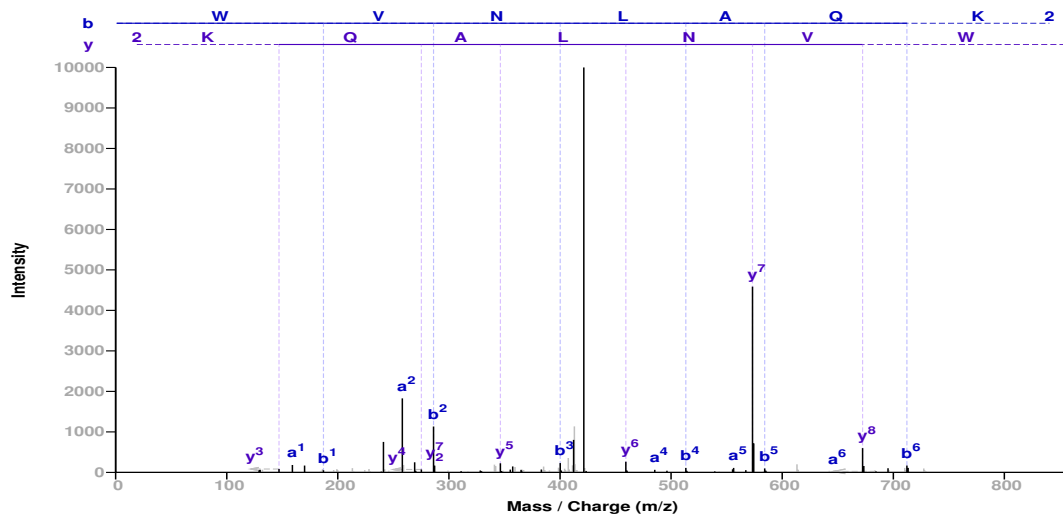

yeast1\_Scan\_Number\_3134 Precursor m/z: 390.717 cosine: 0.776  $\alpha$ : 0.483

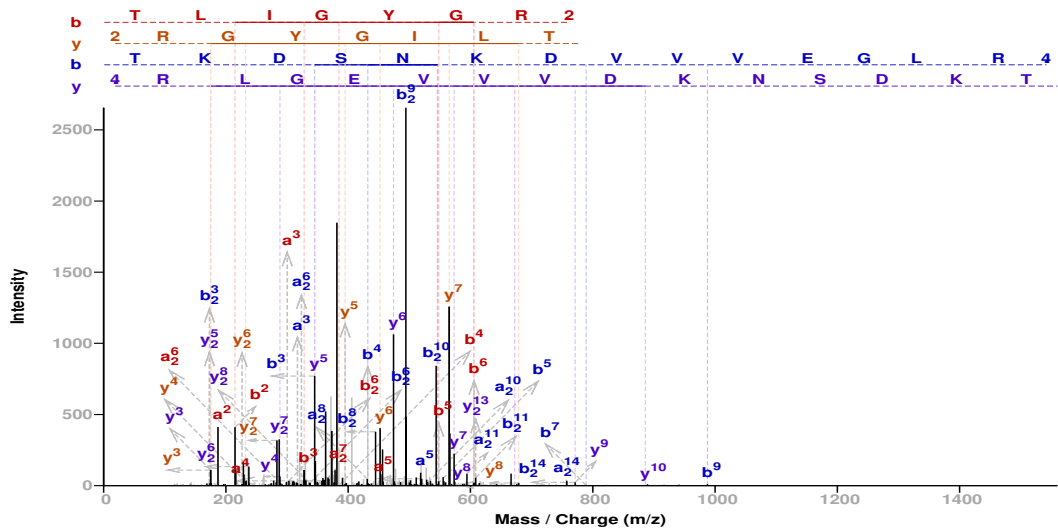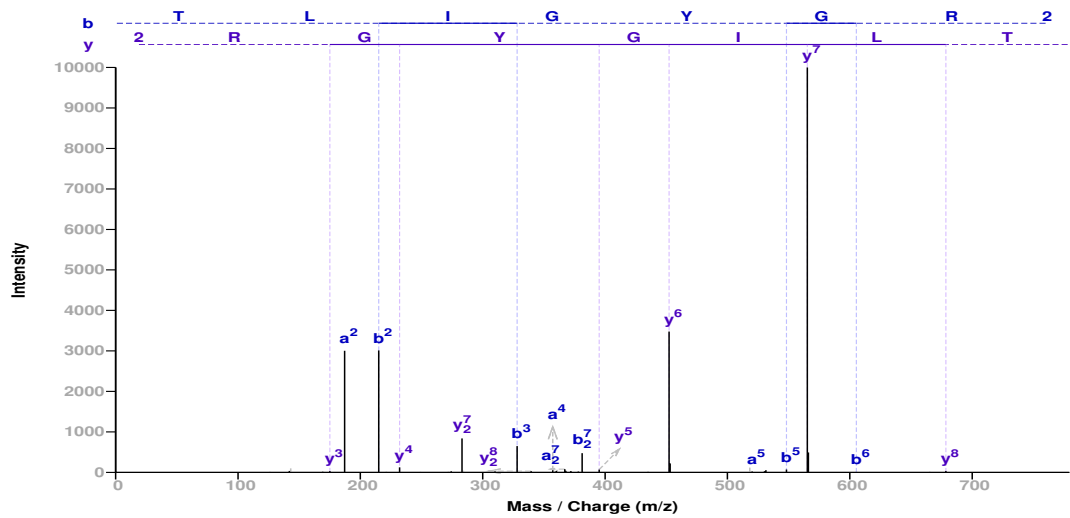

yeast1\_Scan\_Number\_2011 Precursor m/z: 625.839 cosine: 0.748  $\alpha$ : 0.482

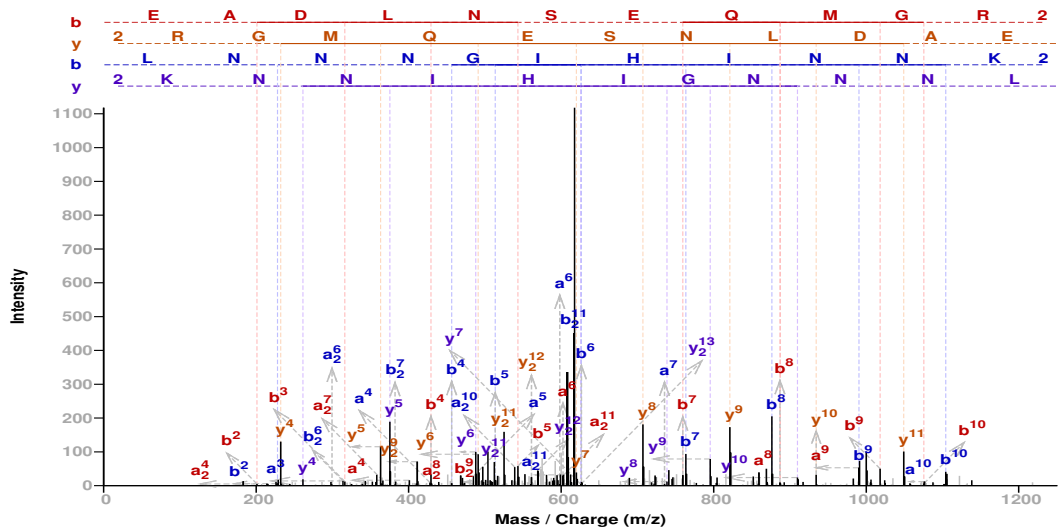

yeast1\_Scan\_Number\_2627 Precursor m/z: 423.723 cosine: 0.862  $\alpha$ : 0.480

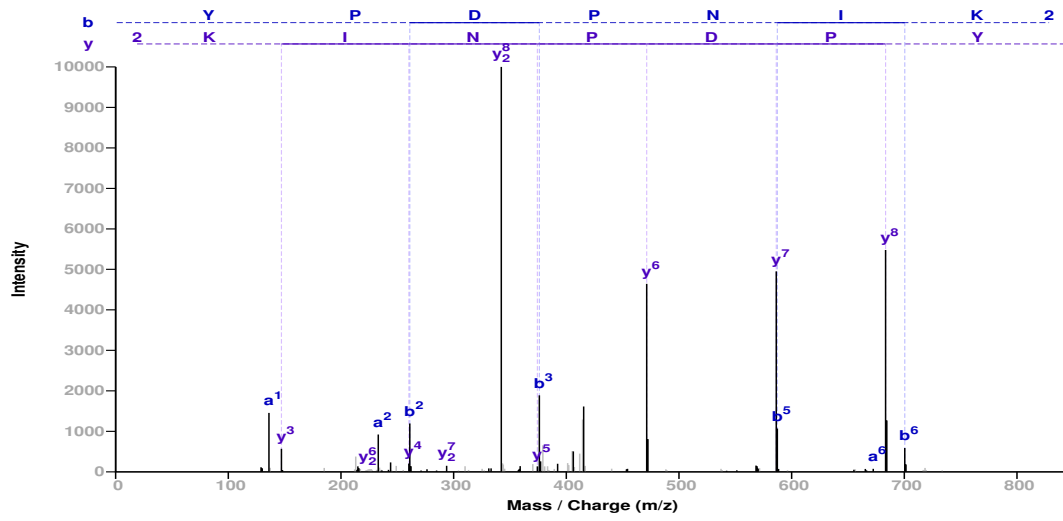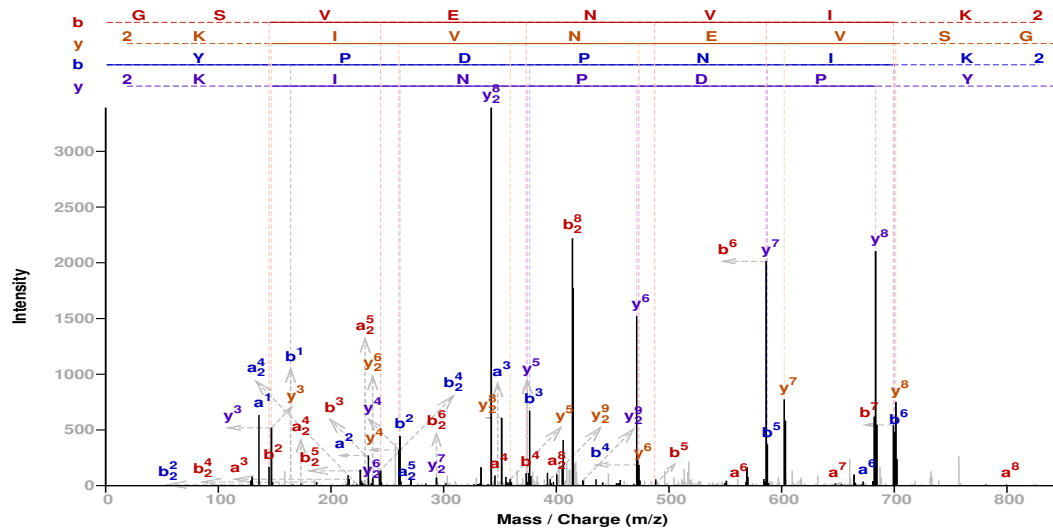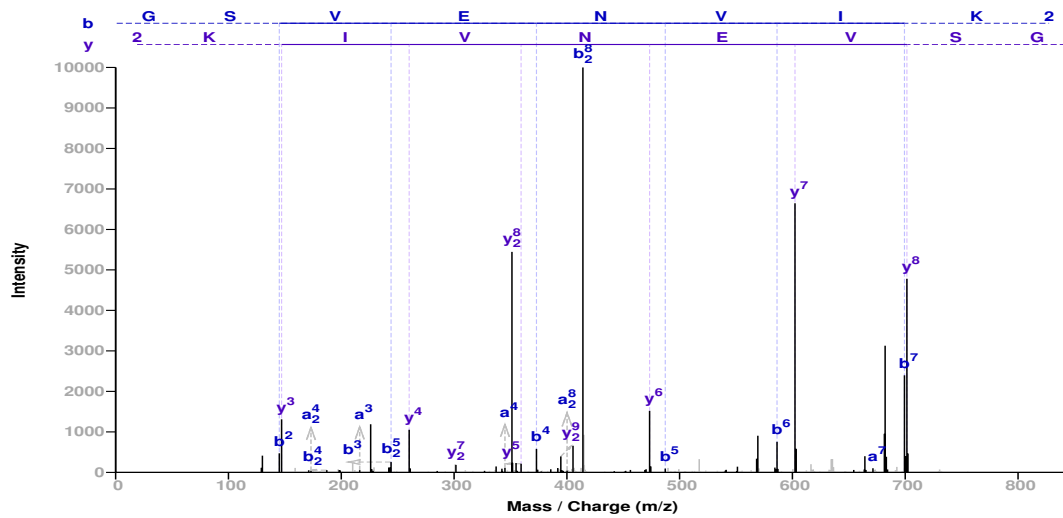



yeast1\_Scan\_Number\_2780 Precursor m/z: 628.326 cosine: 0.779  $\alpha$ : 0.477

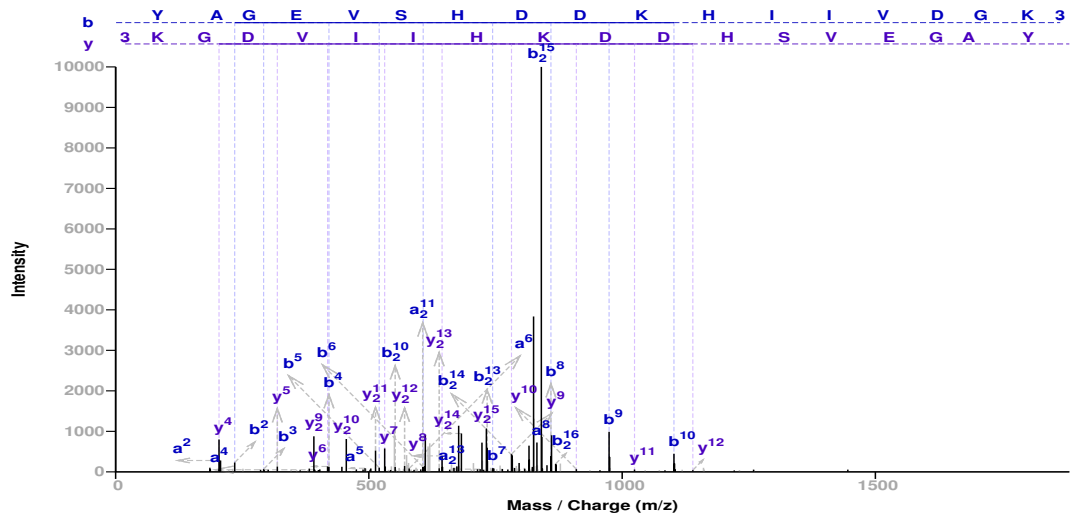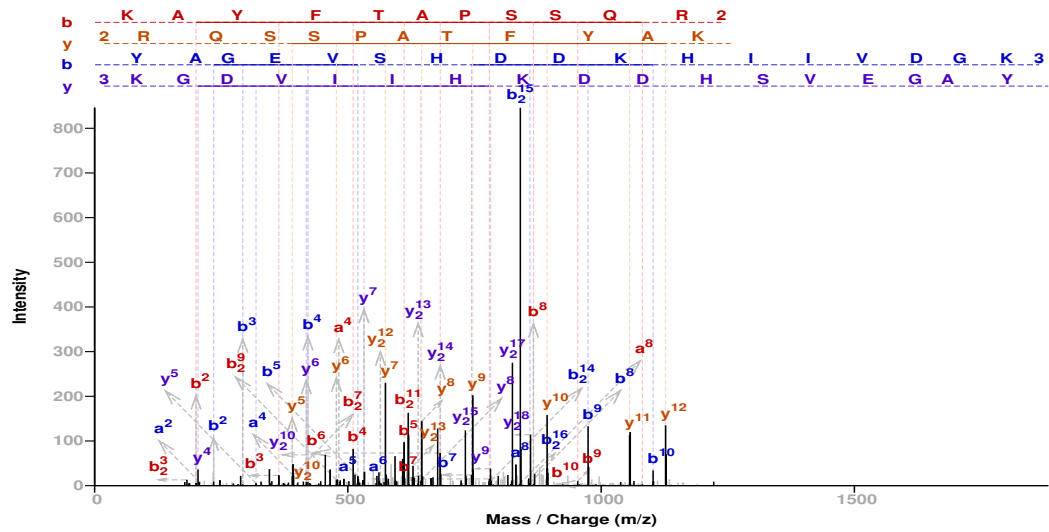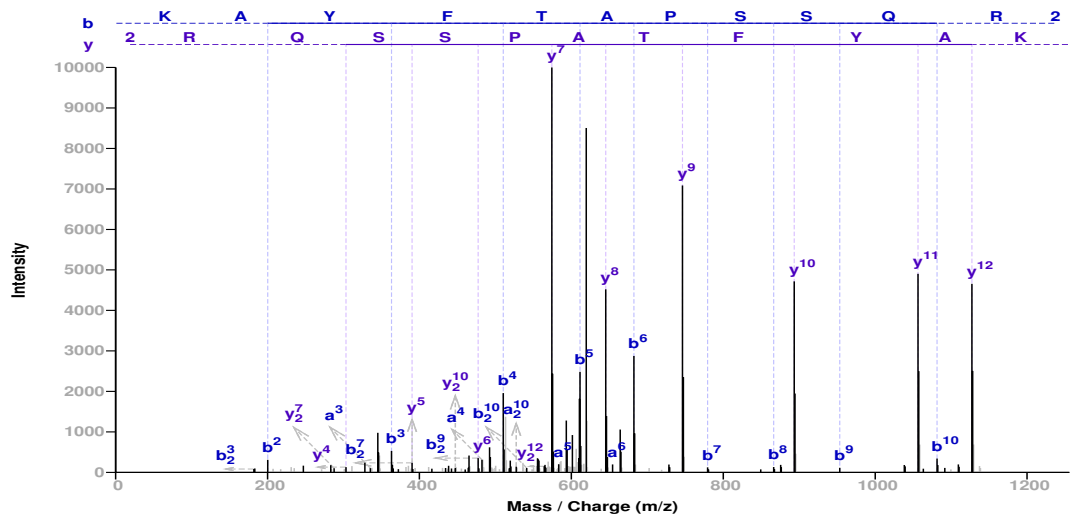

yeast1\_Scan\_Number\_7555 Precursor m/z: 559.794 cosine: 0.838  $\alpha$ : 0.475

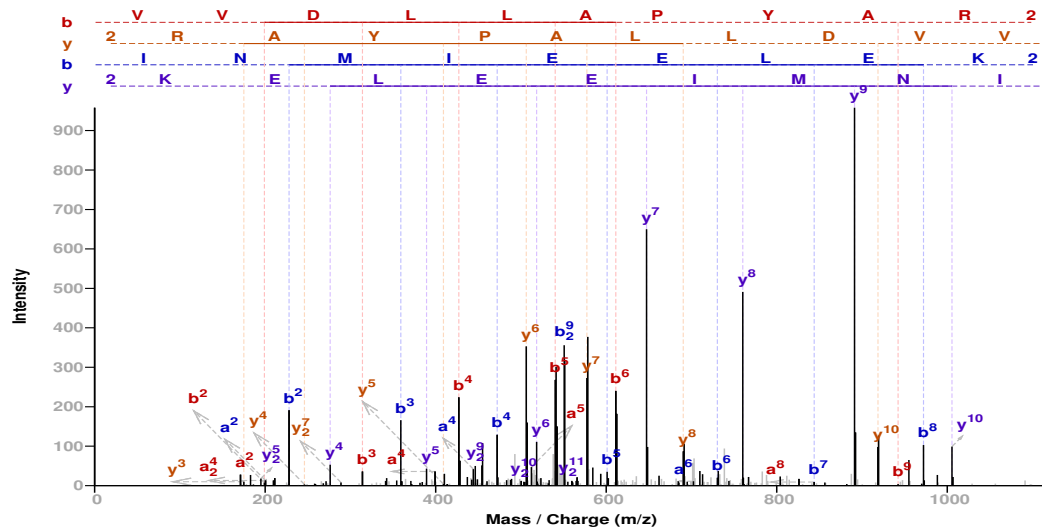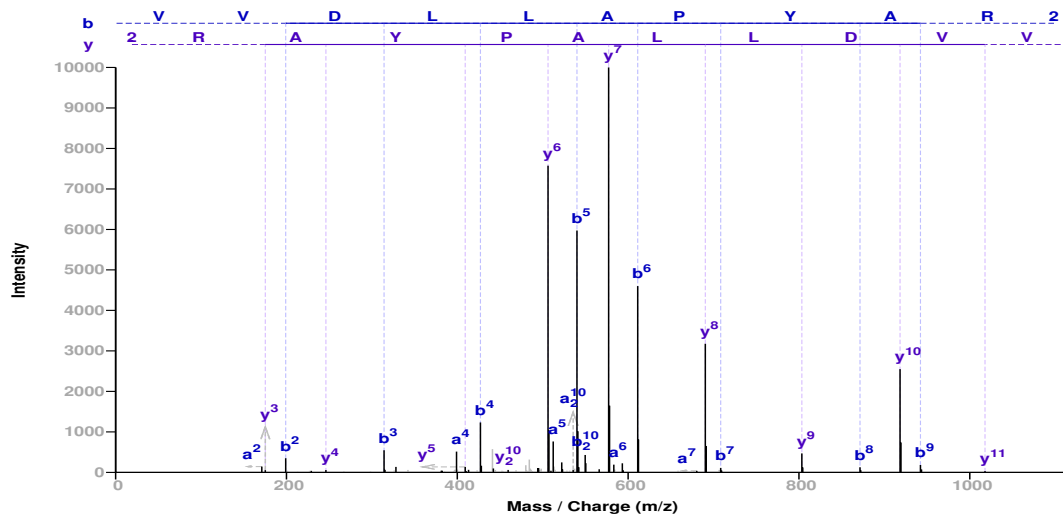

yeast1\_Scan\_Number\_5449 Precursor m/z: 582.306 cosine: 0.835  $\alpha$ : 0.473

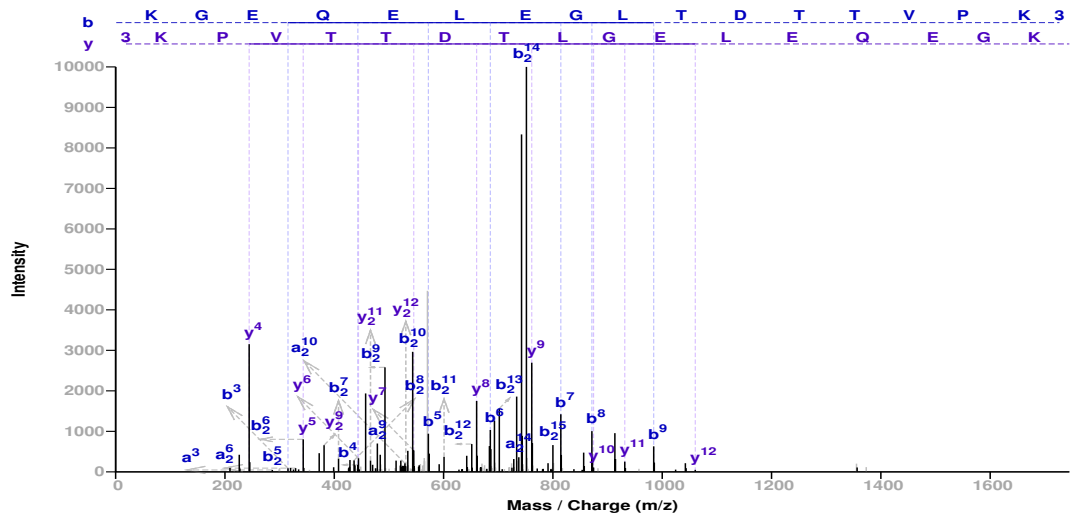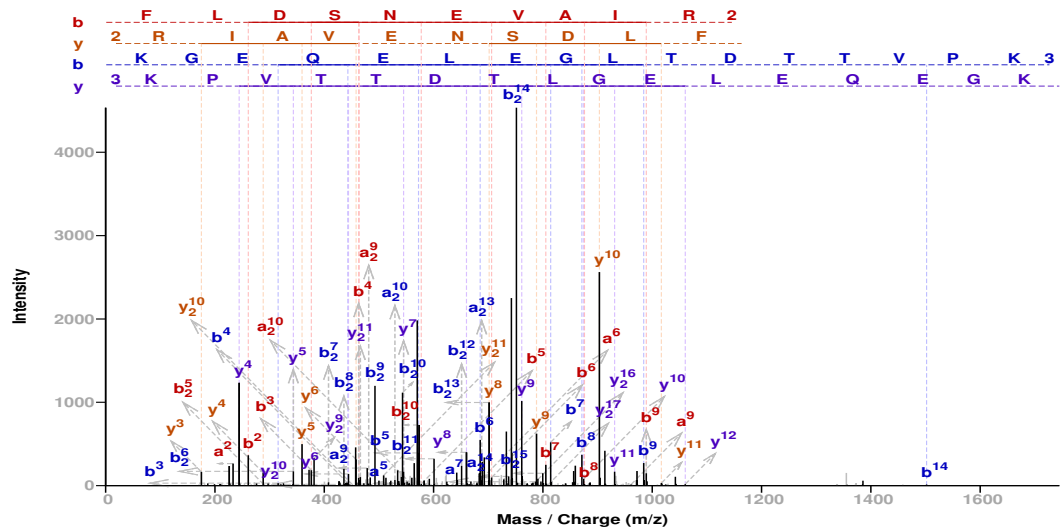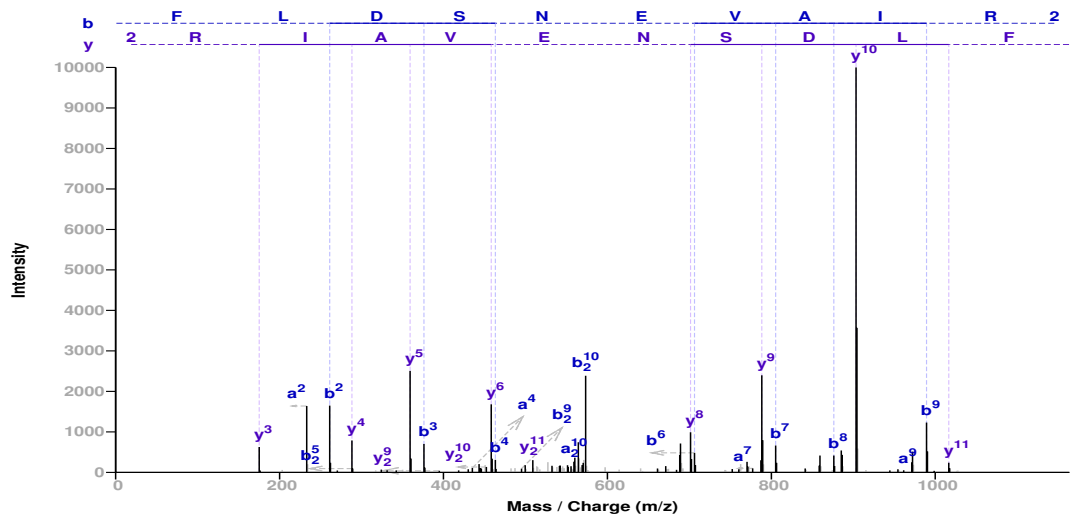

yeast1\_Scan\_Number\_4626 Precursor m/z: 769.381 cosine: 0.756  $\alpha$ : 0.472

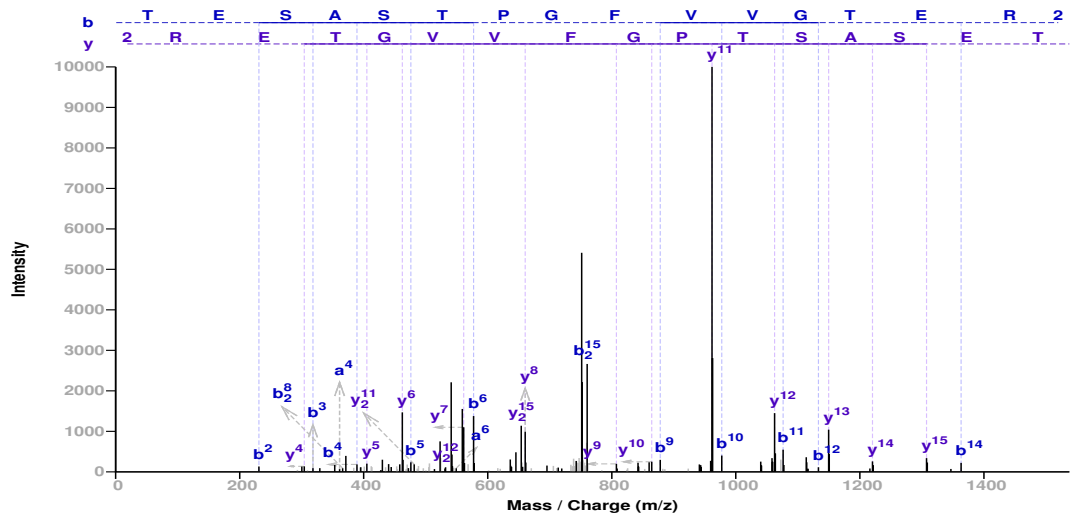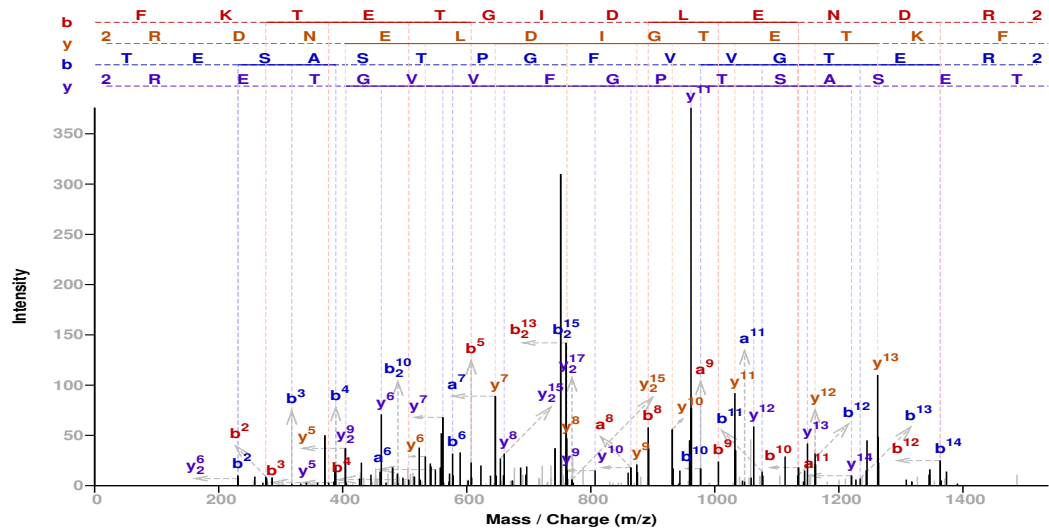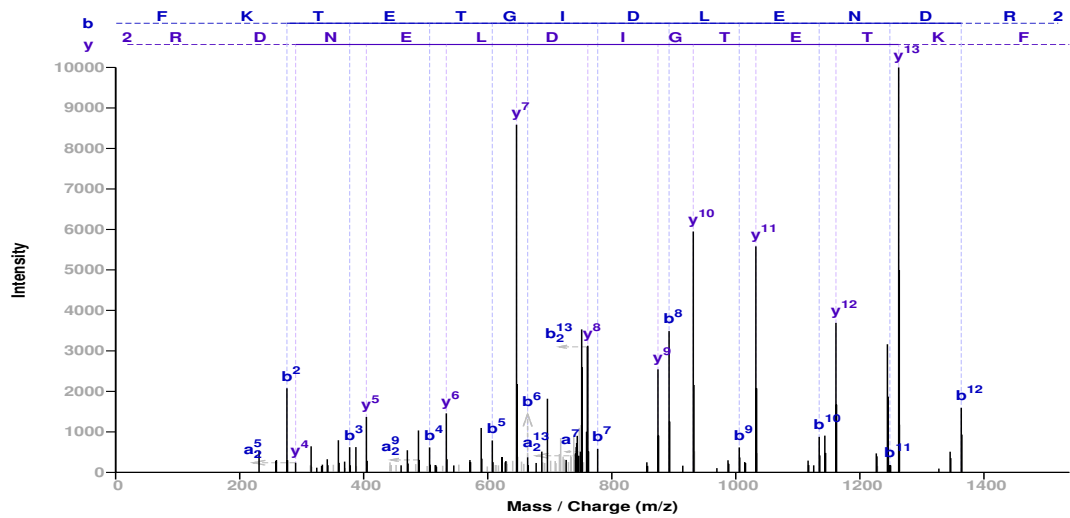

yeast1\_Scan\_Number\_2614 Precursor m/z: 432.750 cosine: 0.783  $\alpha$ : 0.471

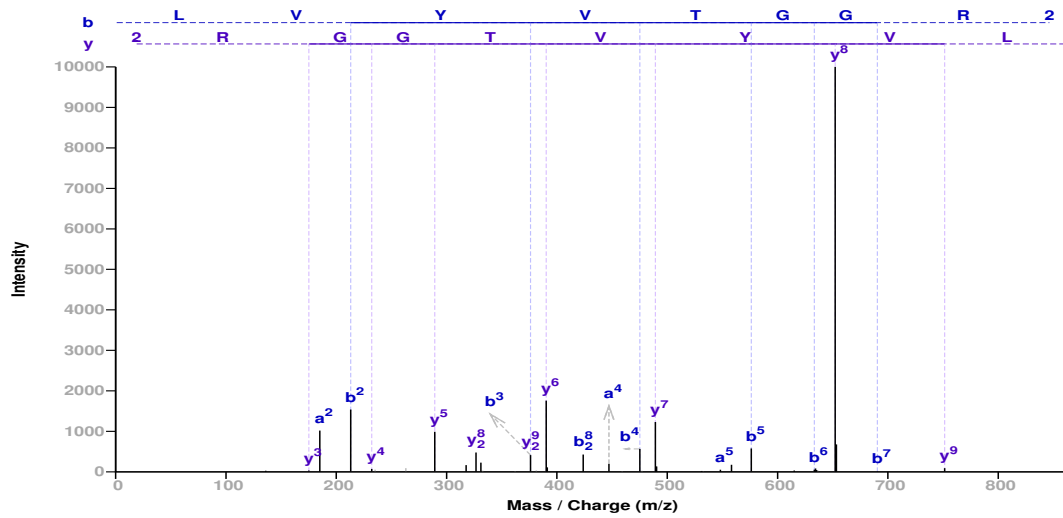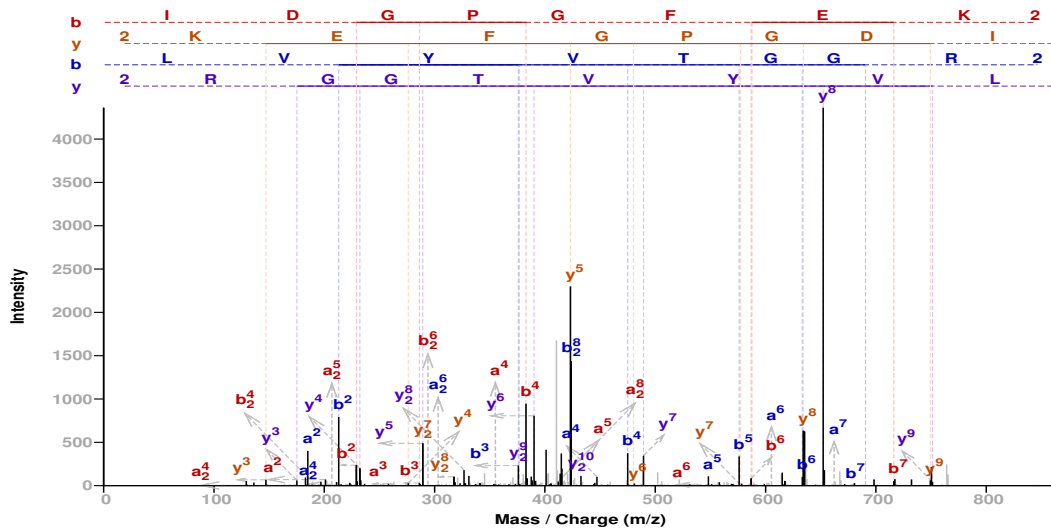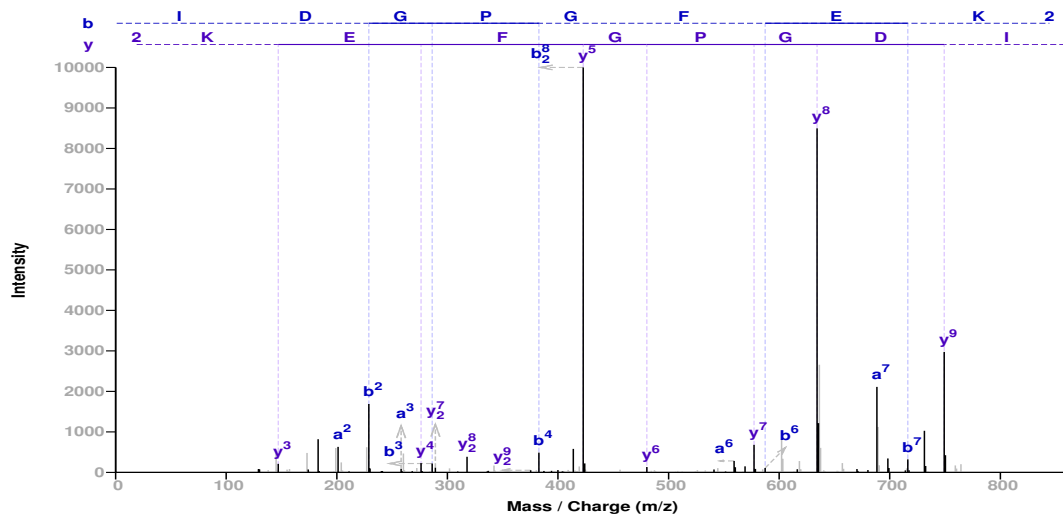

yeast1\_Scan\_Number\_519 Precursor m/z: 417.206 cosine: 0.813  $\alpha$ : 0.470

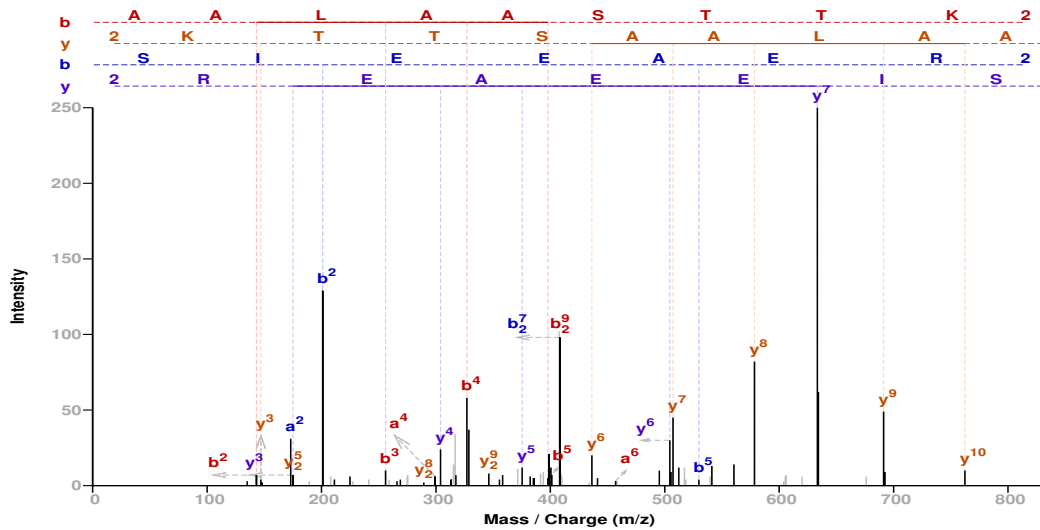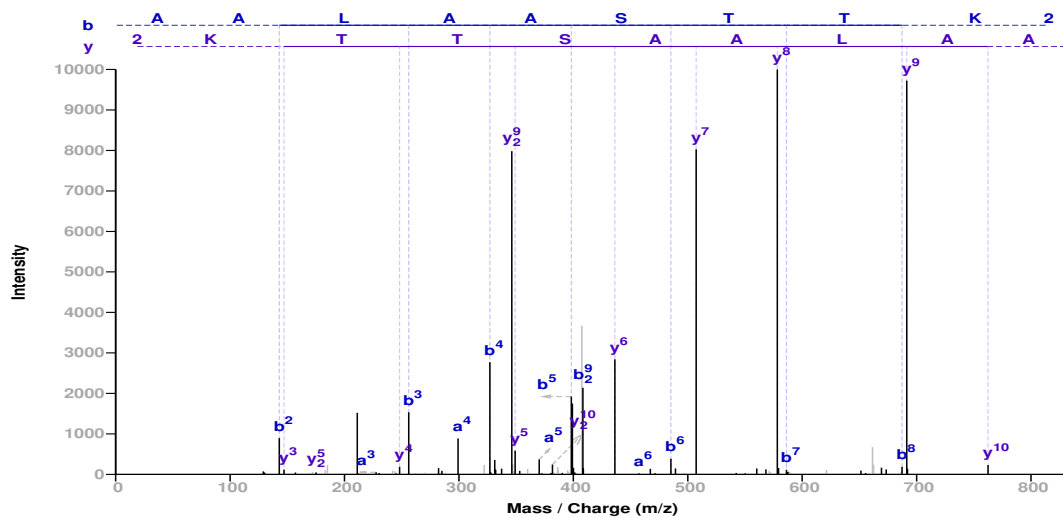

yeast1\_Scan\_Number.1635 Precursor m/z: 393.249 cosine: 0.754  $\alpha$ : 0.463

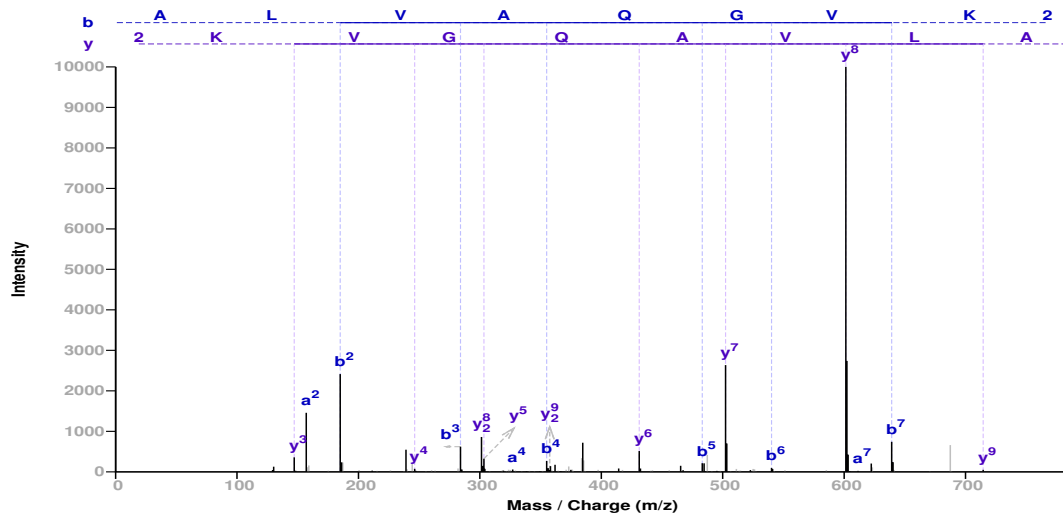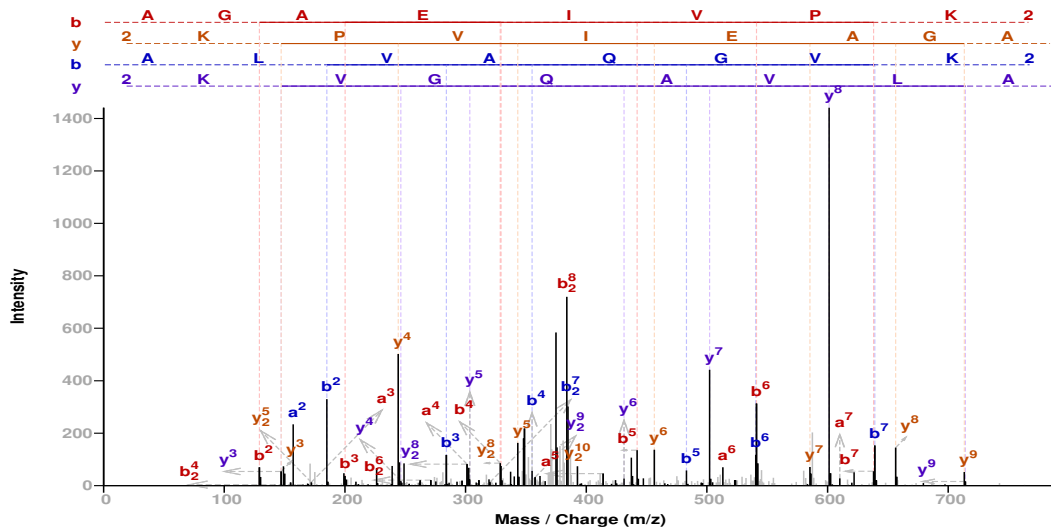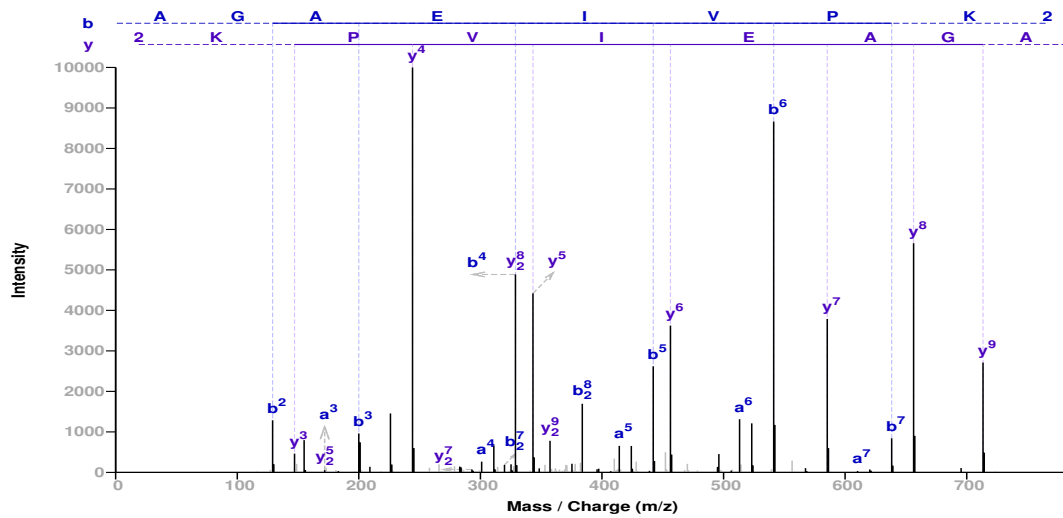

yeast1\_Scan\_Number.1352 Precursor m/z: 480.264 cosine: 0.763  $\alpha$ : 0.463

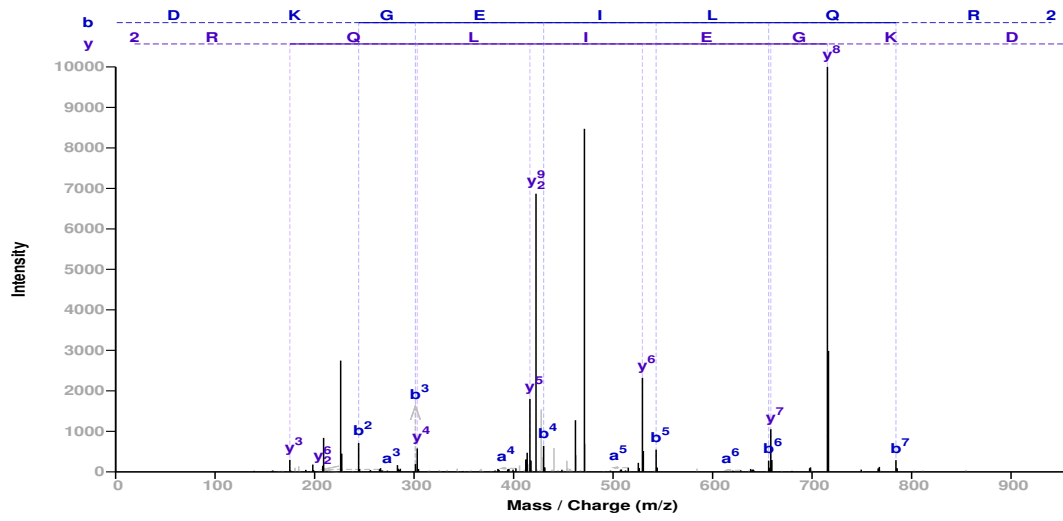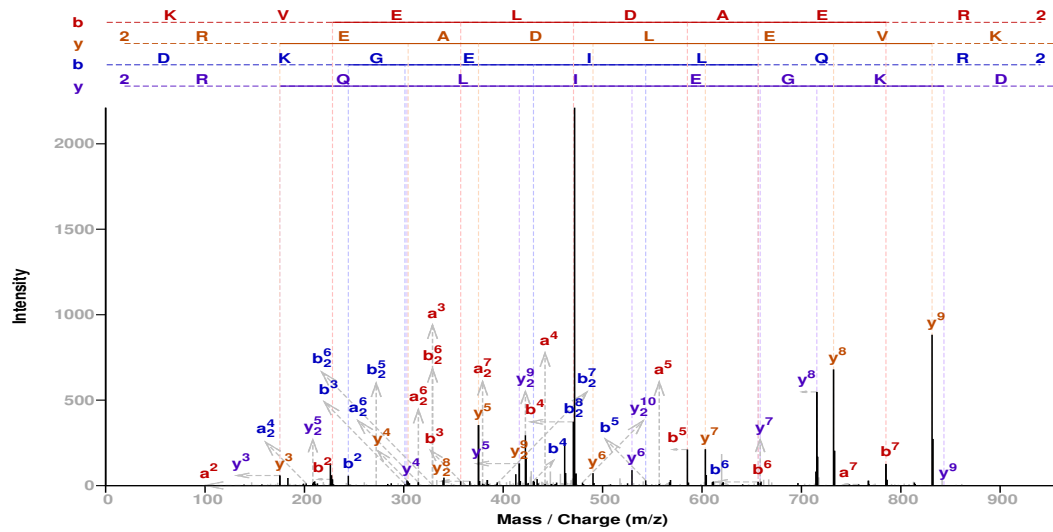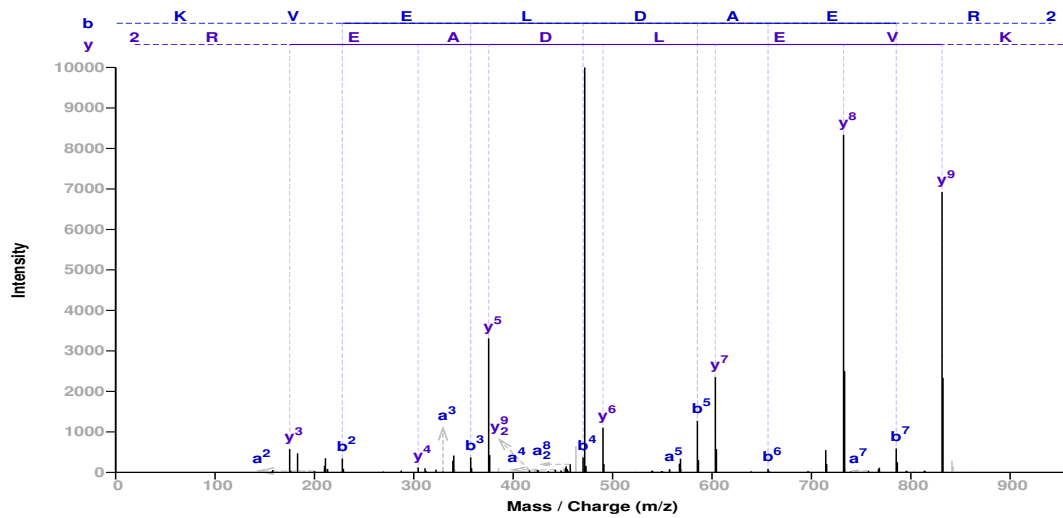



yeast1\_Scan\_Number\_4106 Precursor m/z: 759.389 cosine: 0.838  $\alpha$ : 0.462

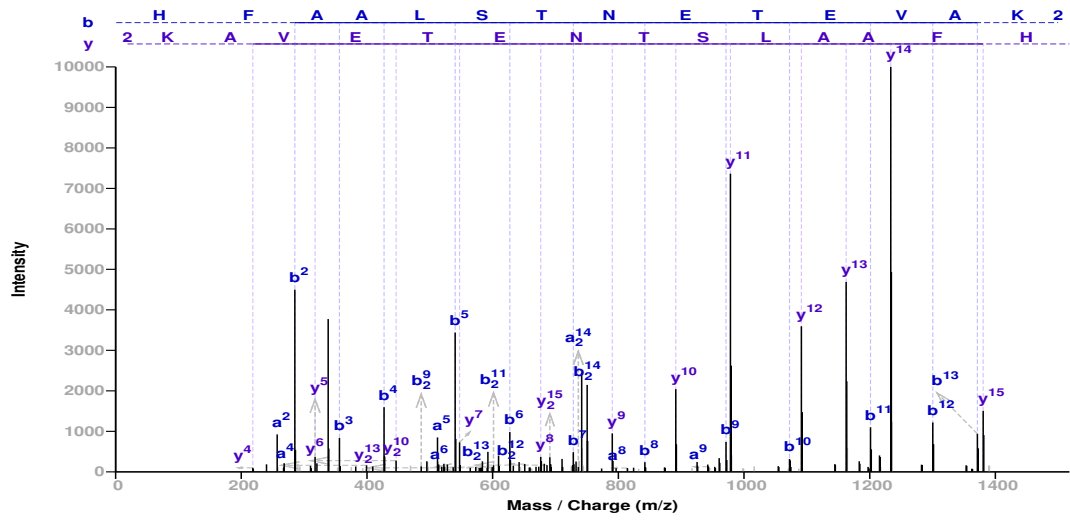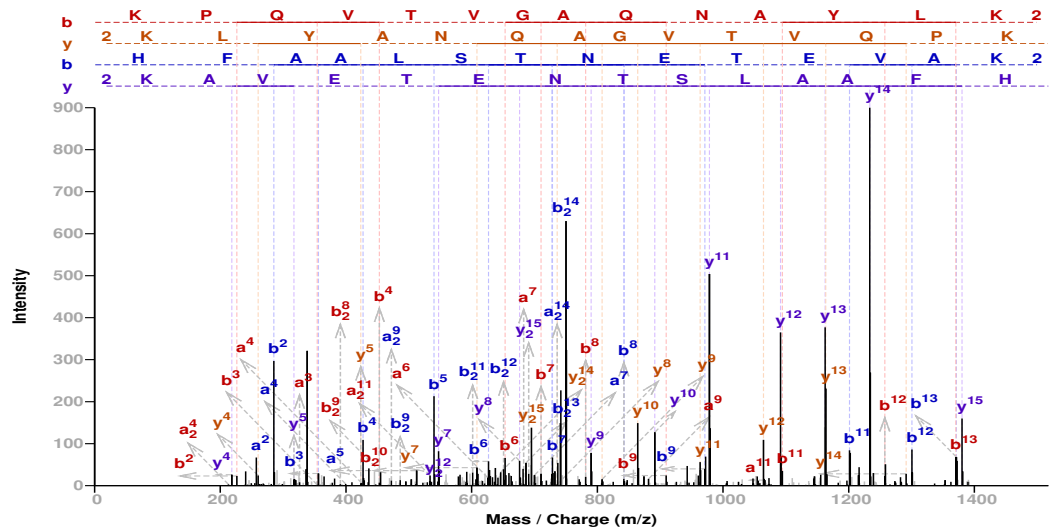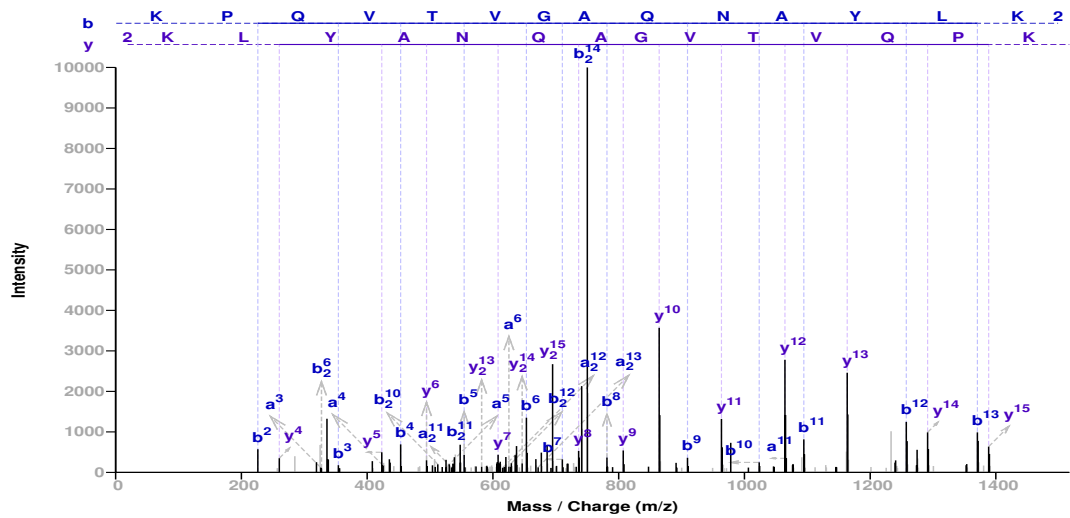

yeast1\_Scan\_Number\_7466 Precursor m/z: 599.318 cosine: 0.807  $\alpha$ : 0.461

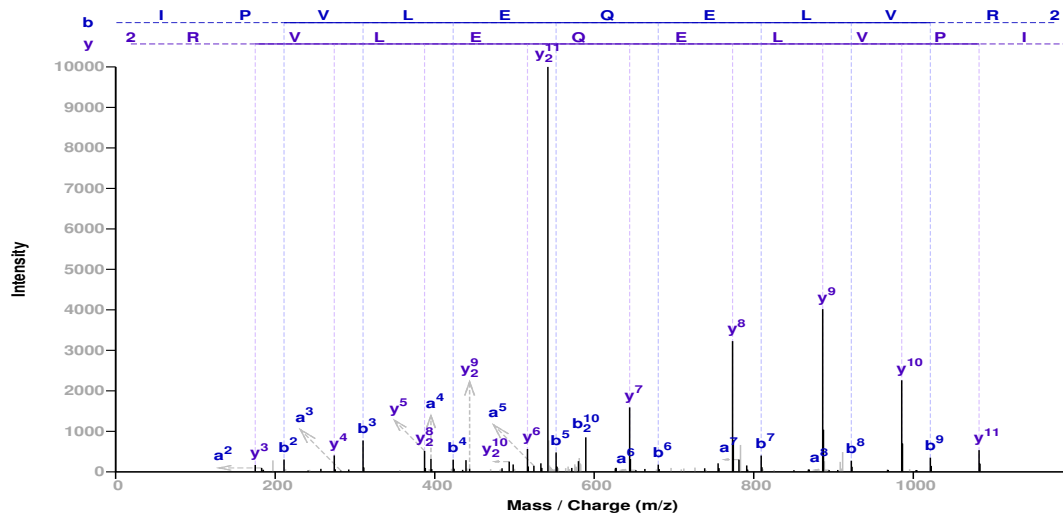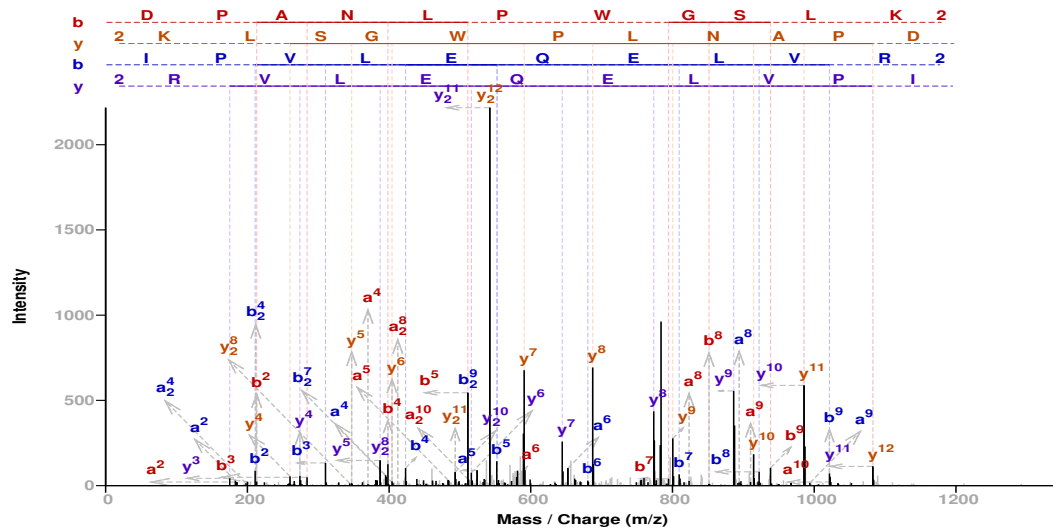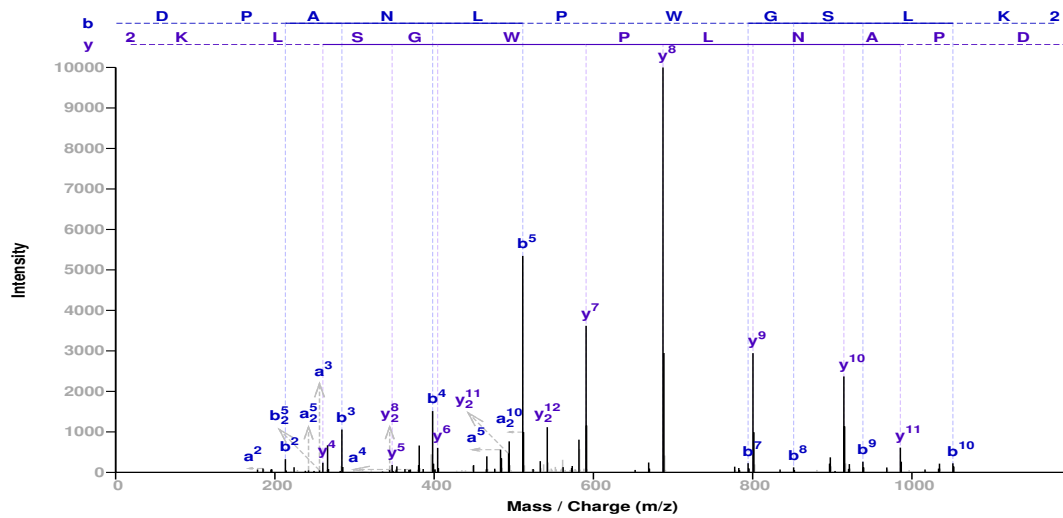

yeast1\_Scan\_Number.1912 Precursor m/z: 496.585 cosine: 0.751  $\alpha$ : 0.461

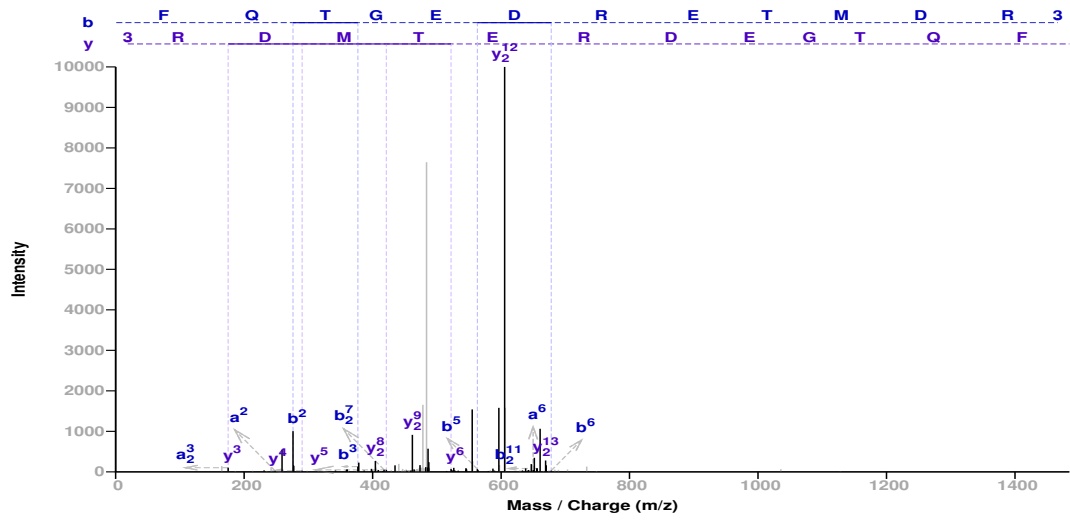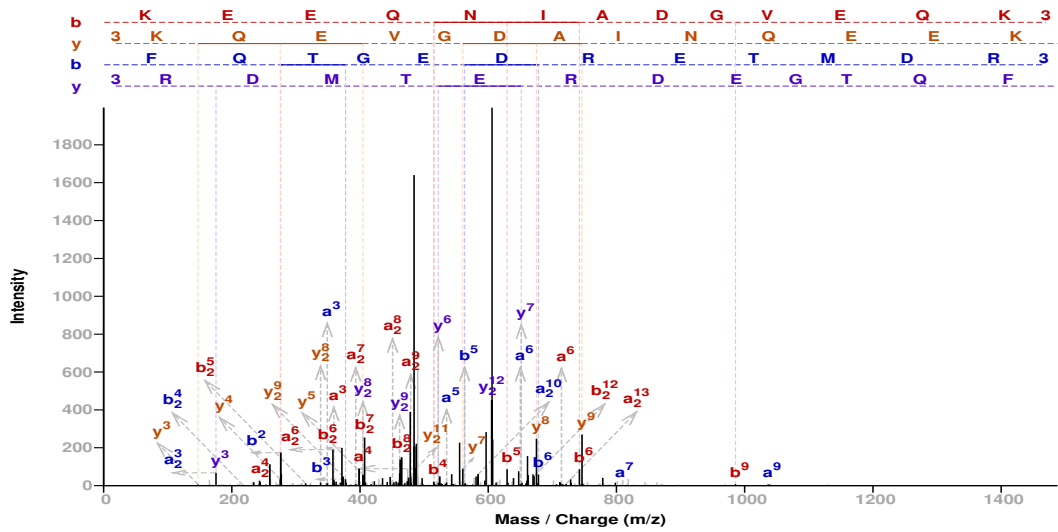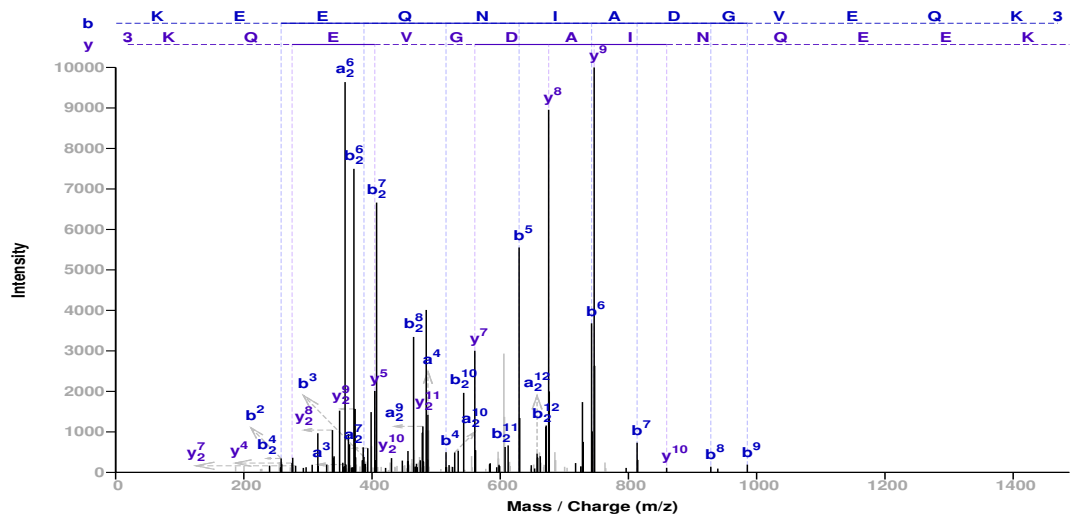



yeast1\_Scan\_Number.1728 Precursor m/z: 690.336 cosine: 0.827  $\alpha$ : 0.456

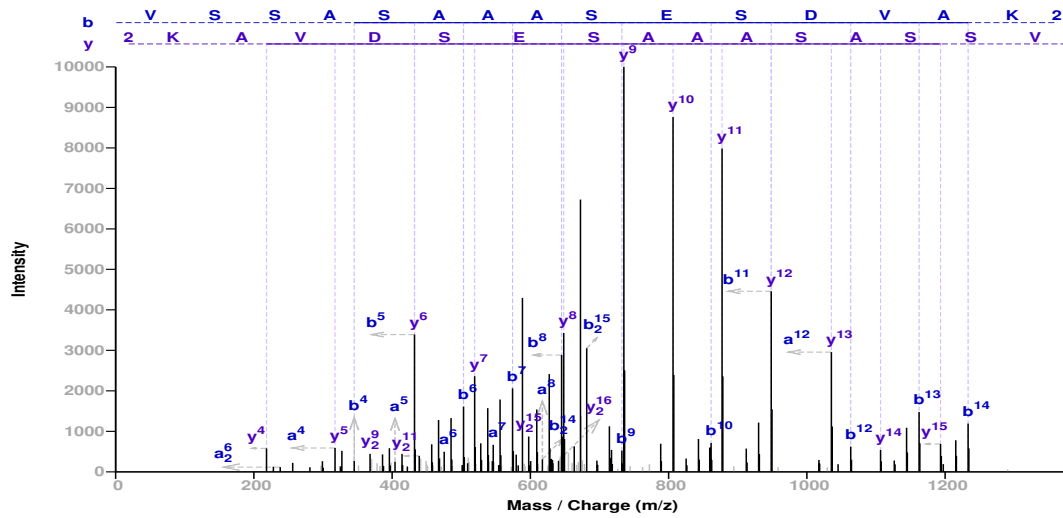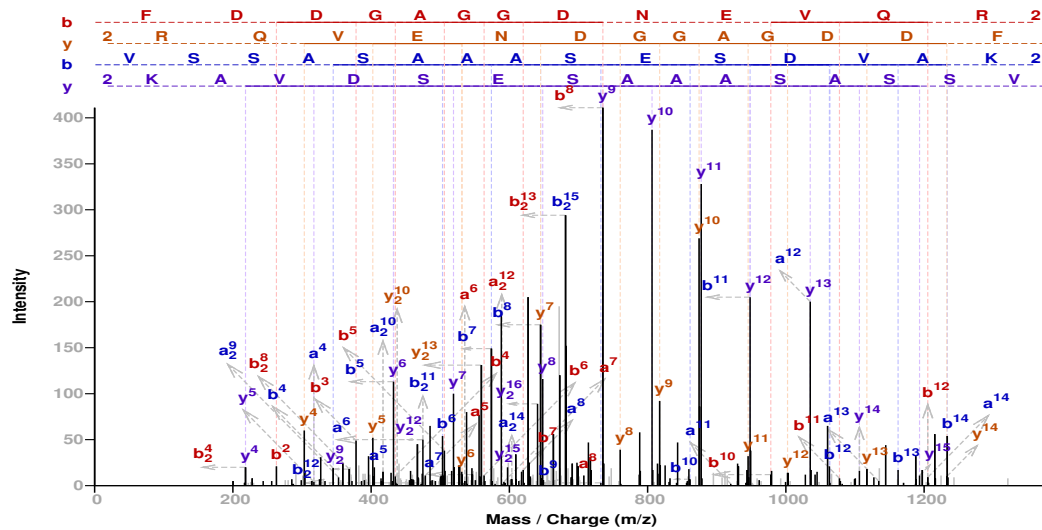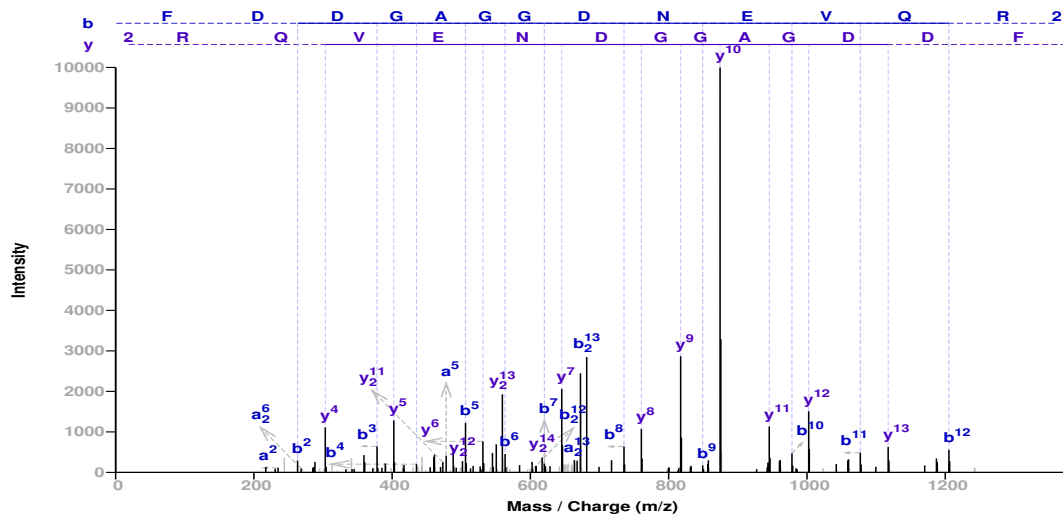

yeast1\_Scan\_Number\_6257 Precursor m/z: 486.945 cosine: 0.783  $\alpha$ : 0.452

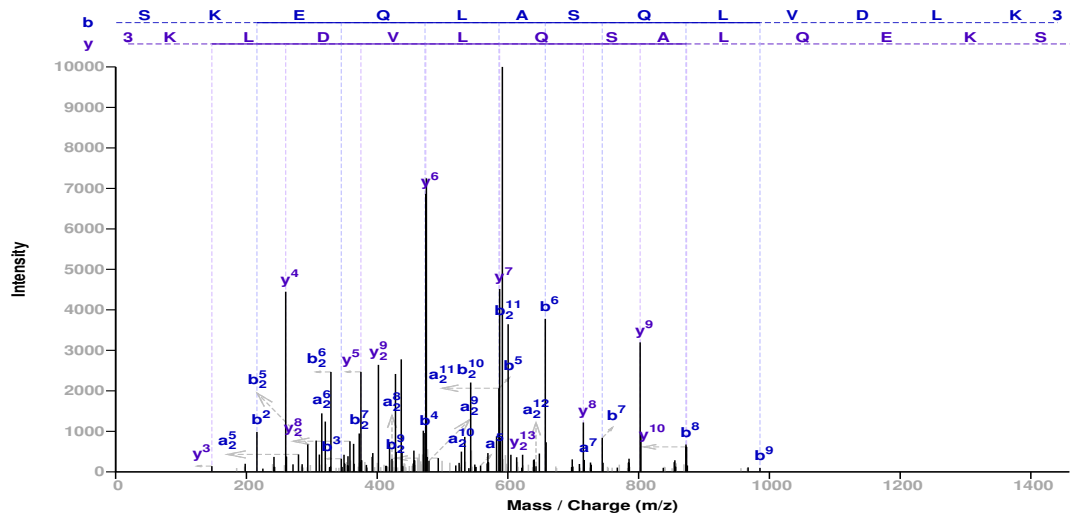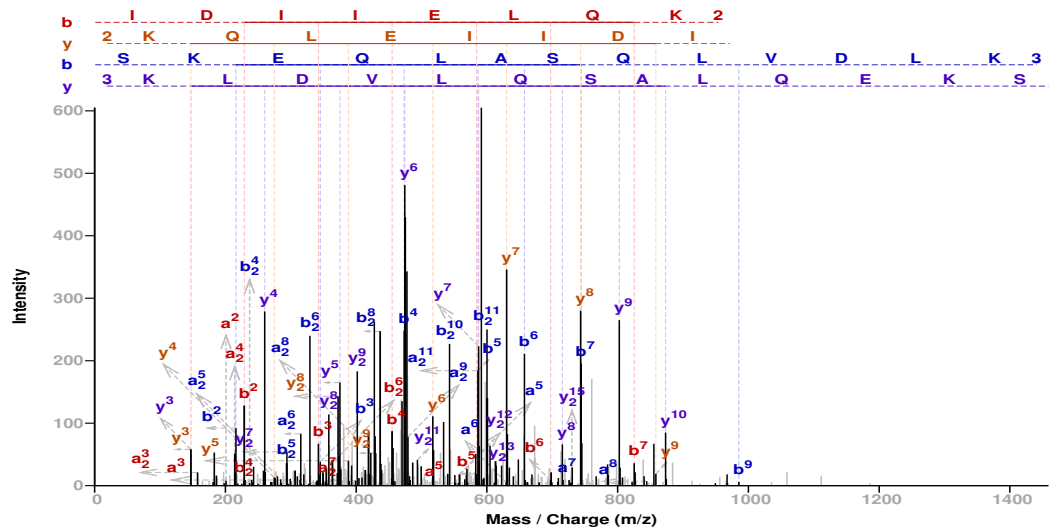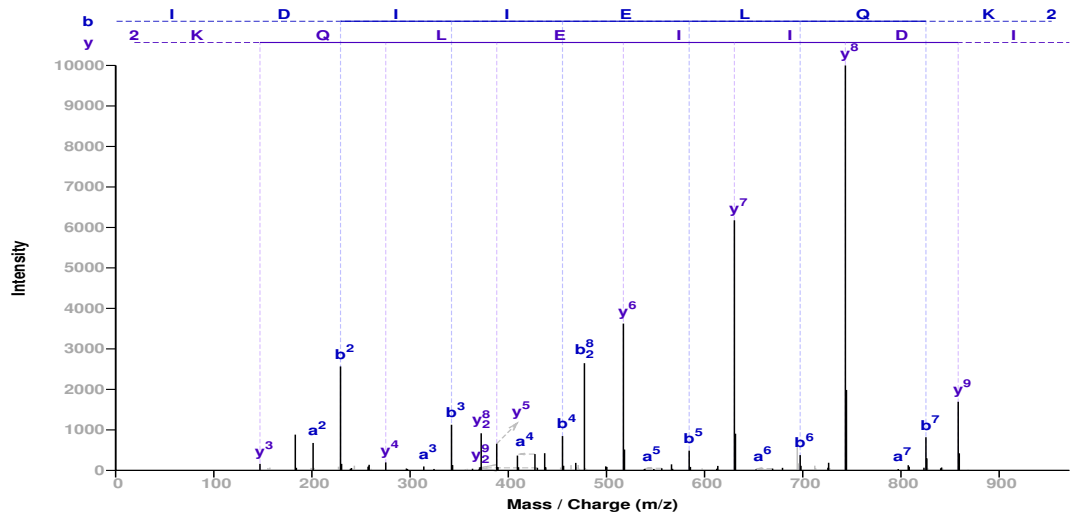

yeast1\_Scan\_Number\_4174 Precursor m/z: 436.778 cosine: 0.827  $\alpha$ : 0.452

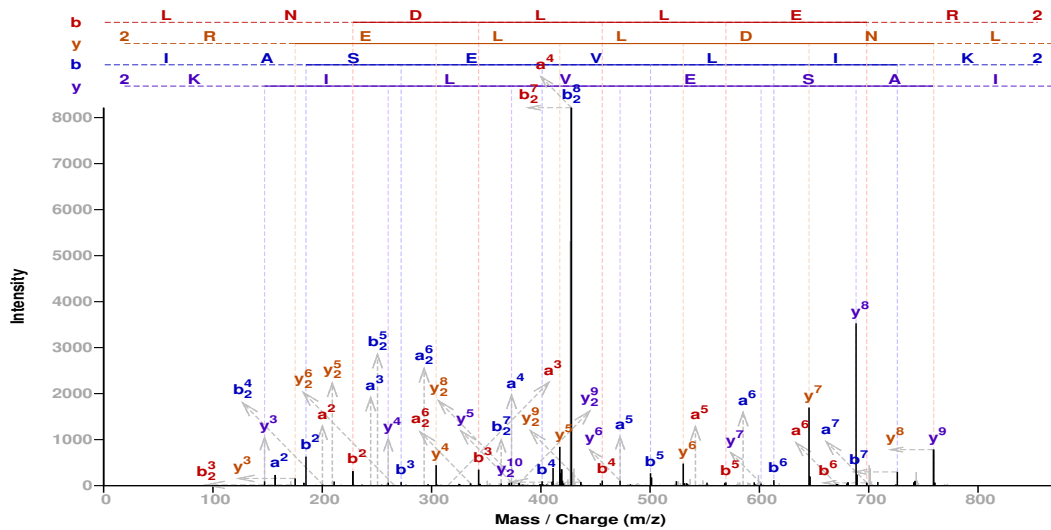

yeast1\_Scan\_Number\_4236 Precursor m/z: 514.773 cosine: 0.779  $\alpha$ : 0.449

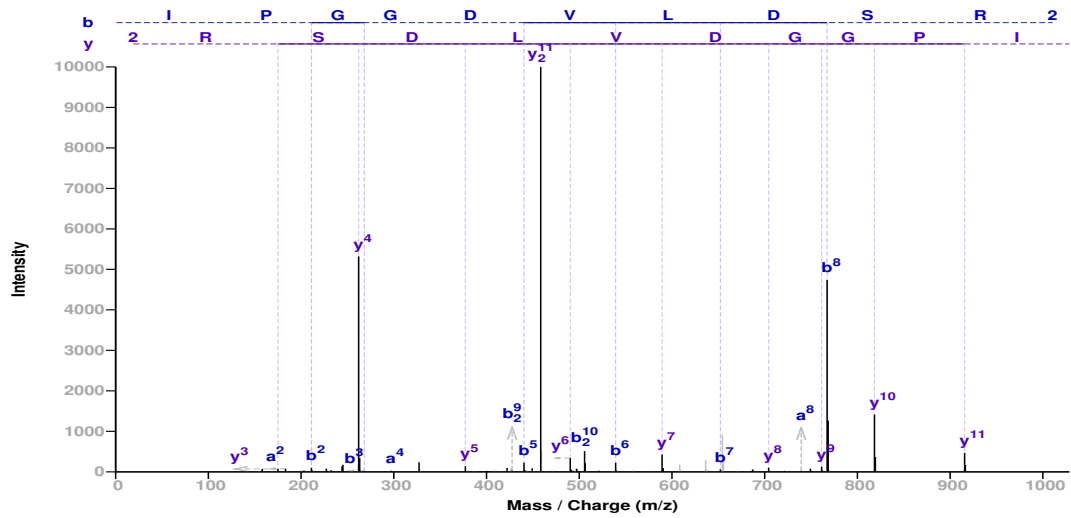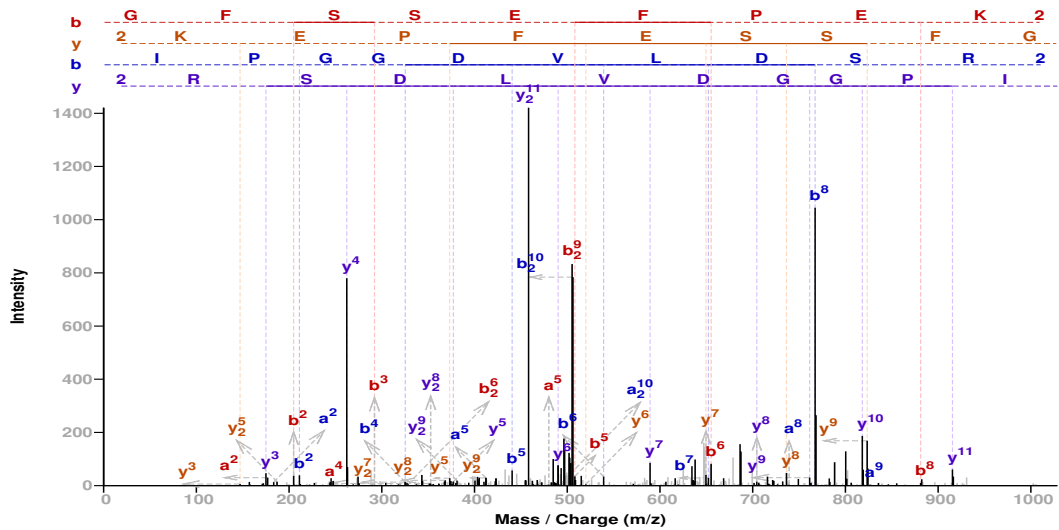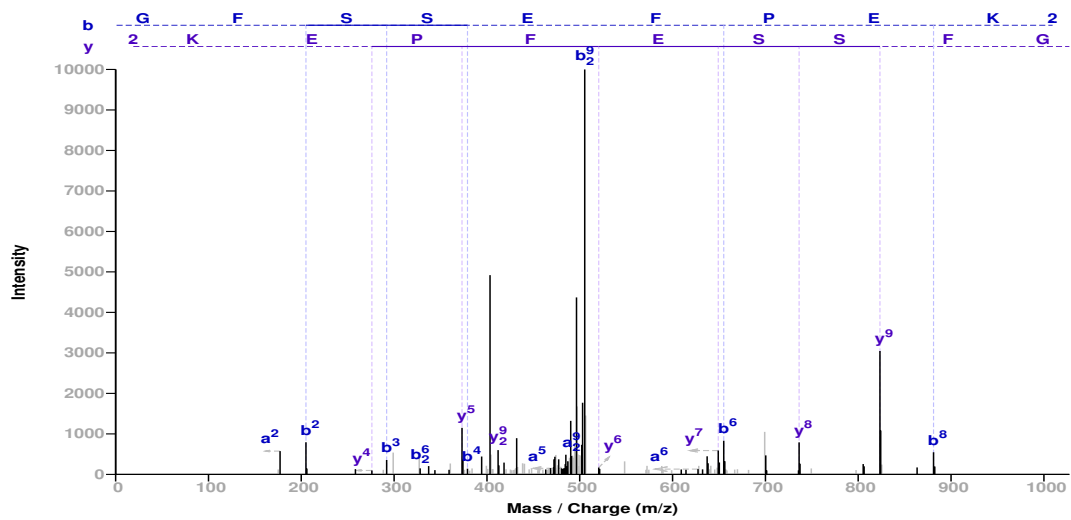



yeast1\_Scan\_Number\_3140 Precursor m/z: 398.529 cosine: 0.813  $\alpha$ : 0.448

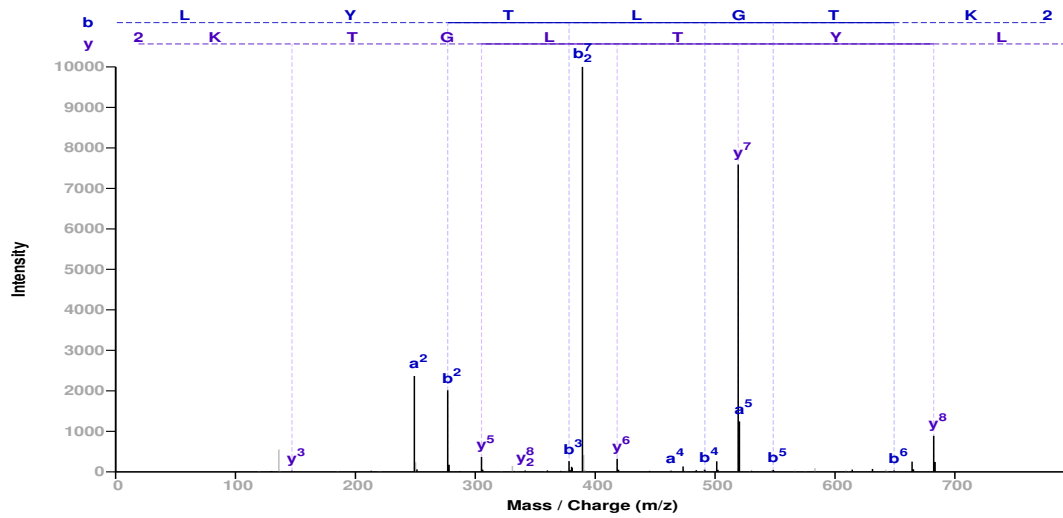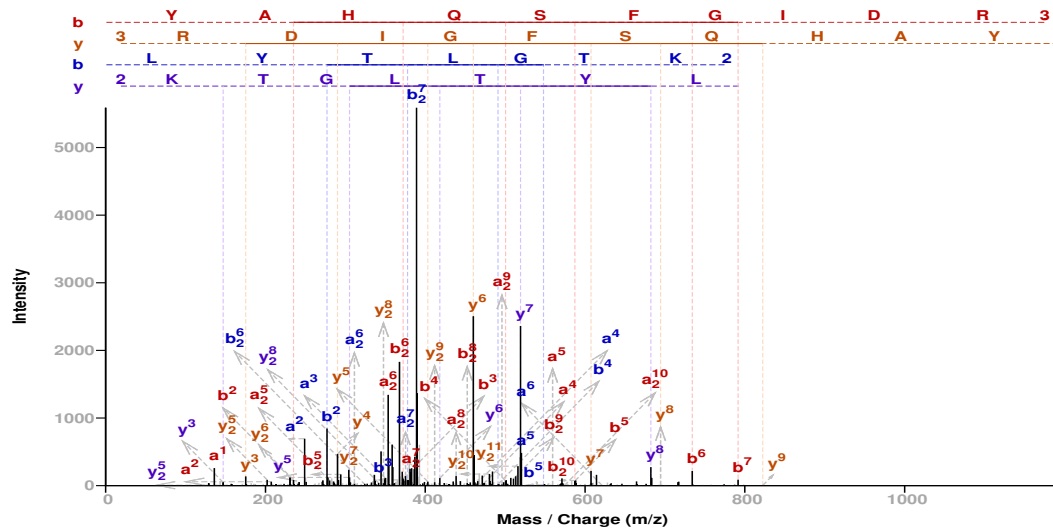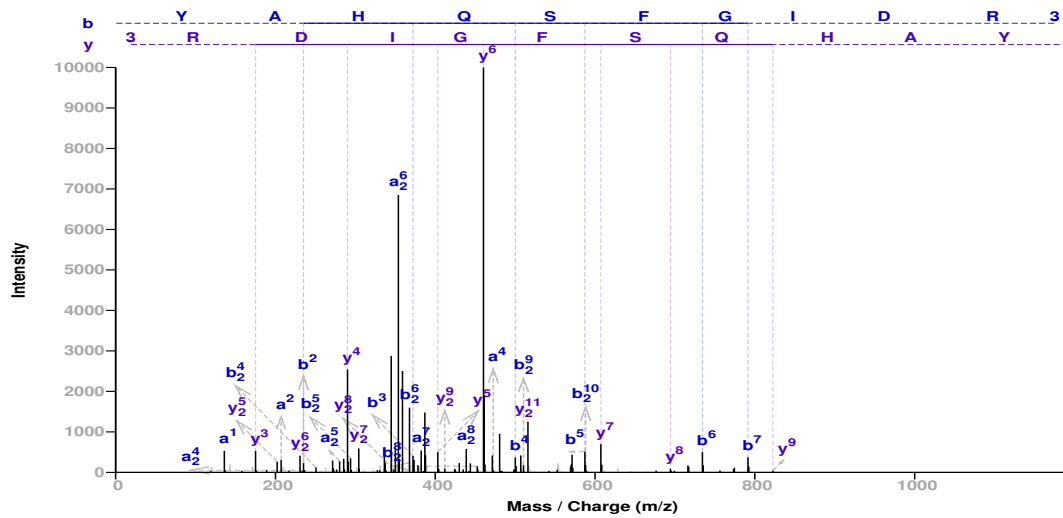

yeast1\_Scan\_Number\_958 Precursor m/z: 352.222 cosine: 0.791  $\alpha$ : 0.445

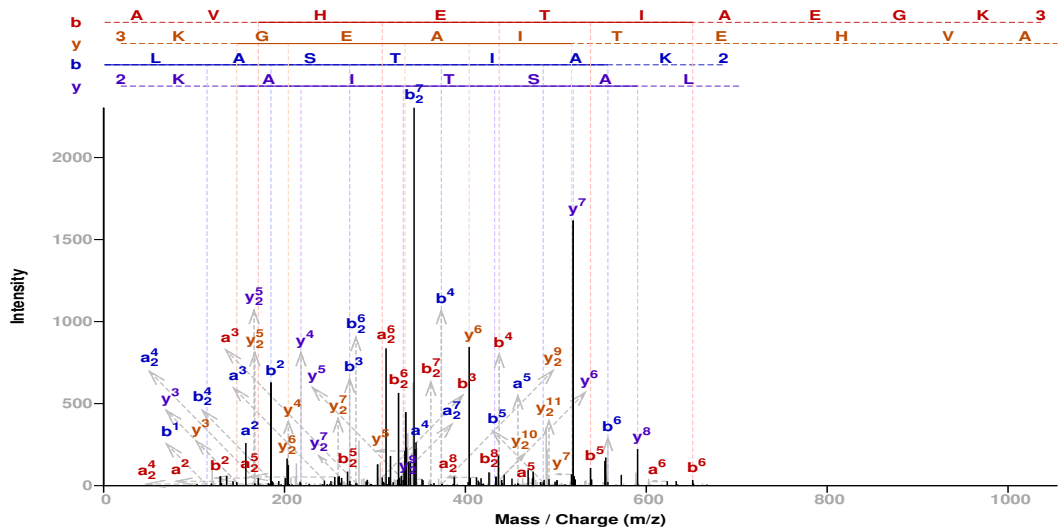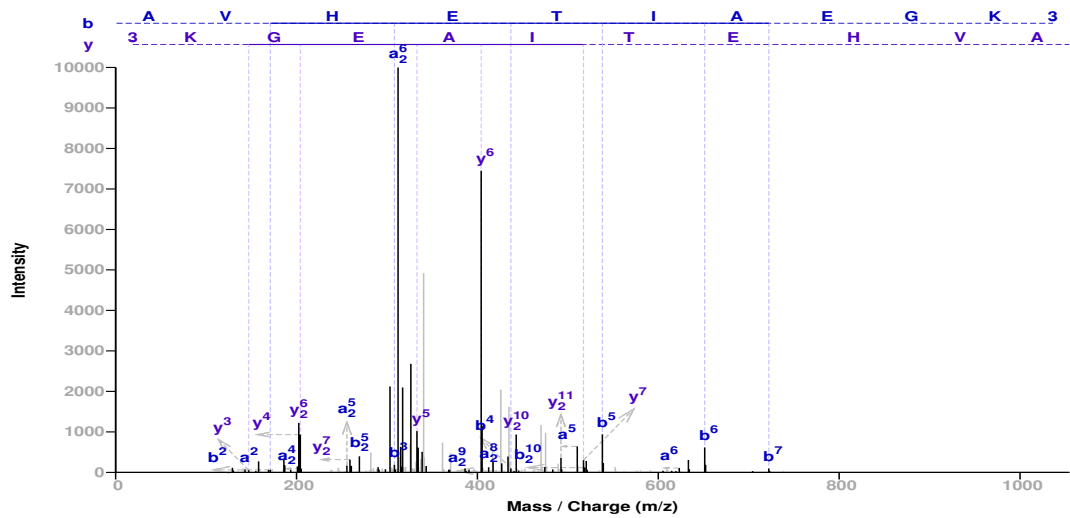

yeast1\_Scan\_Number\_2696 Precursor m/z: 354.702 cosine: 0.921  $\alpha$ : 0.438

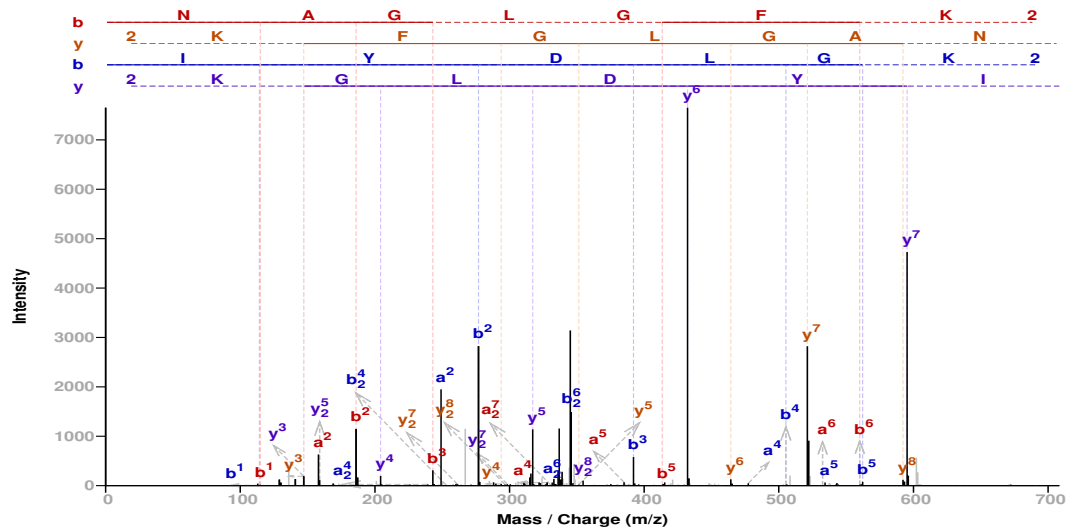

yeast1\_Scan\_Number\_3763 Precursor m/z: 407.745 cosine: 0.799  $\alpha$ : 0.436

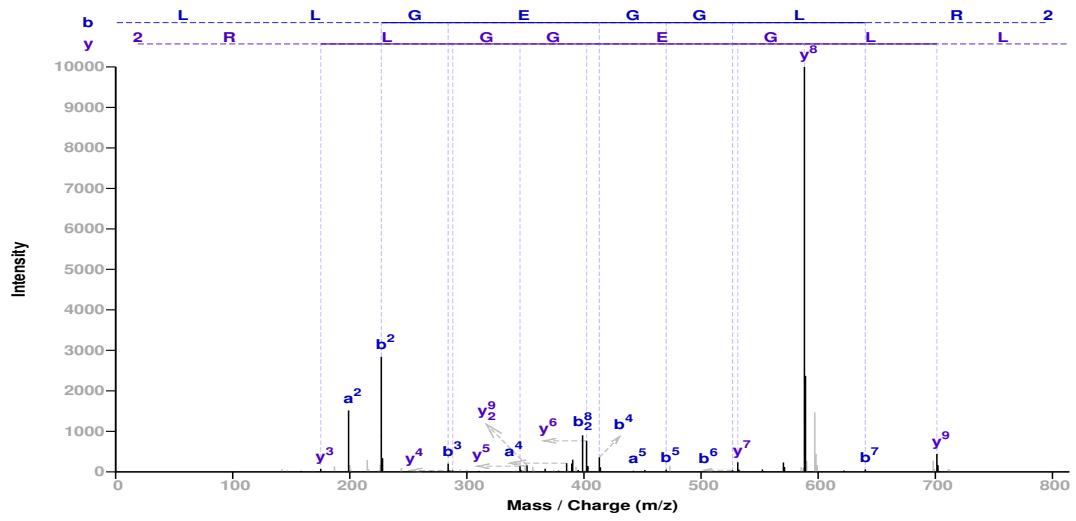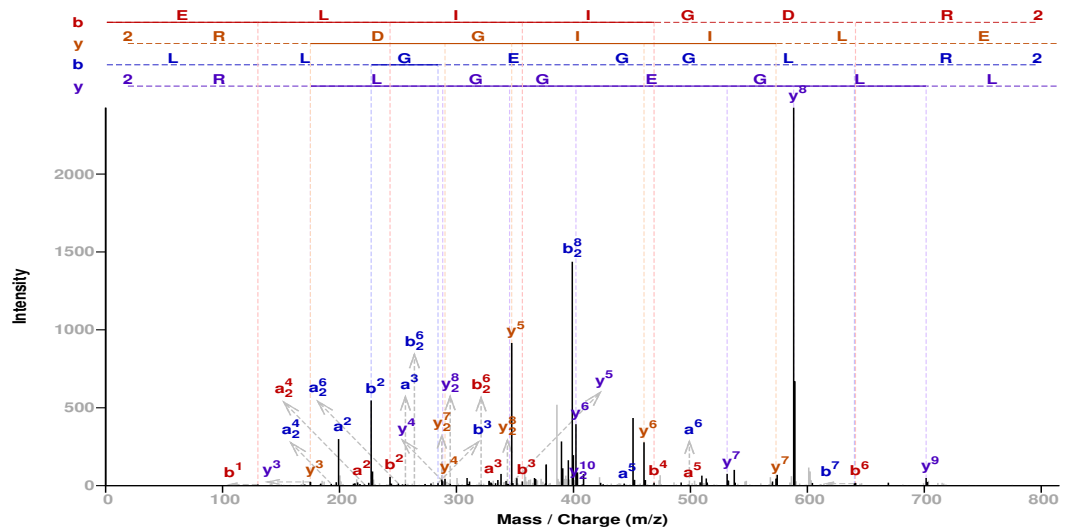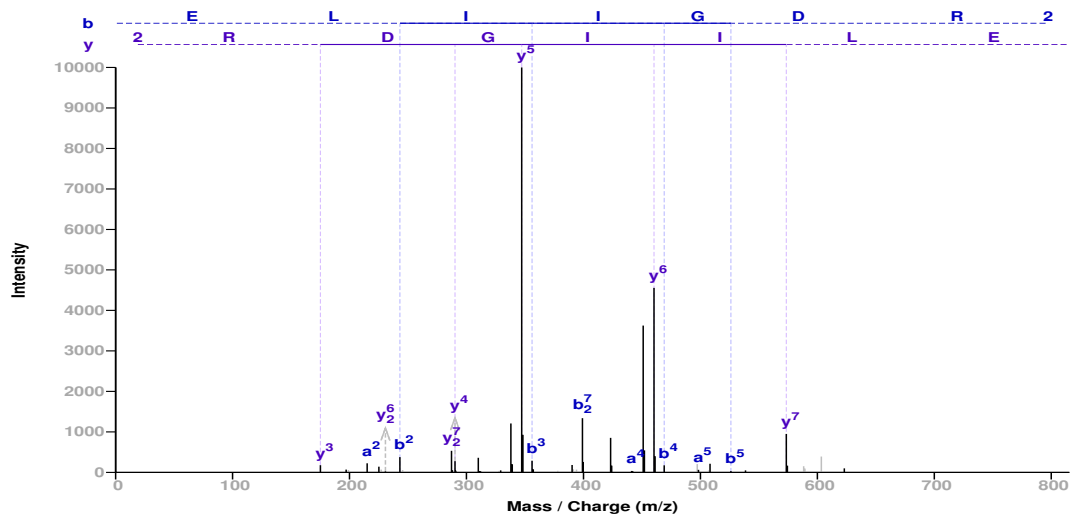

yeast1\_Scan\_Number\_2400 Precursor m/z: 409.226 cosine: 0.909  $\alpha$ : 0.435

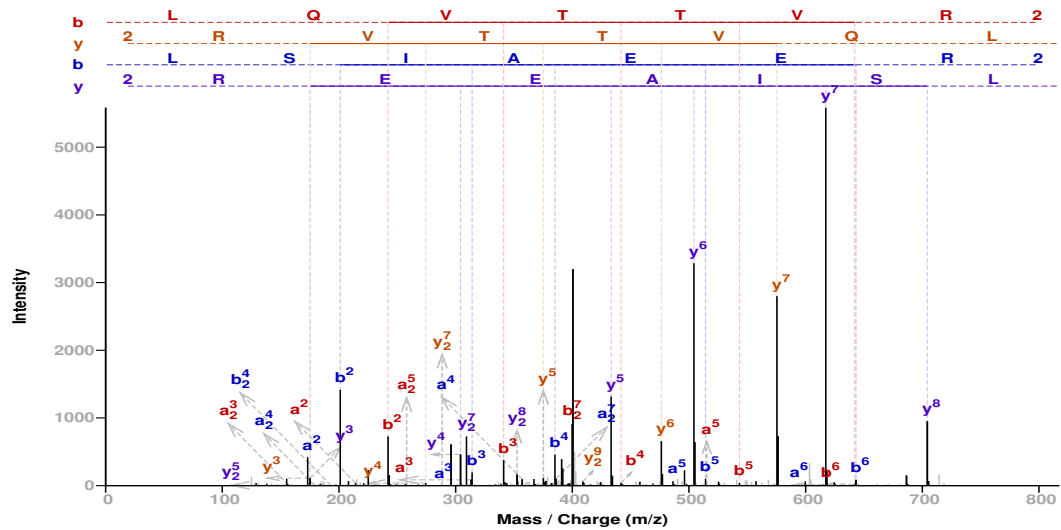

yeast1\_Scan\_Number\_3102 Precursor m/z: 637.833 cosine: 0.801  $\alpha$ : 0.427

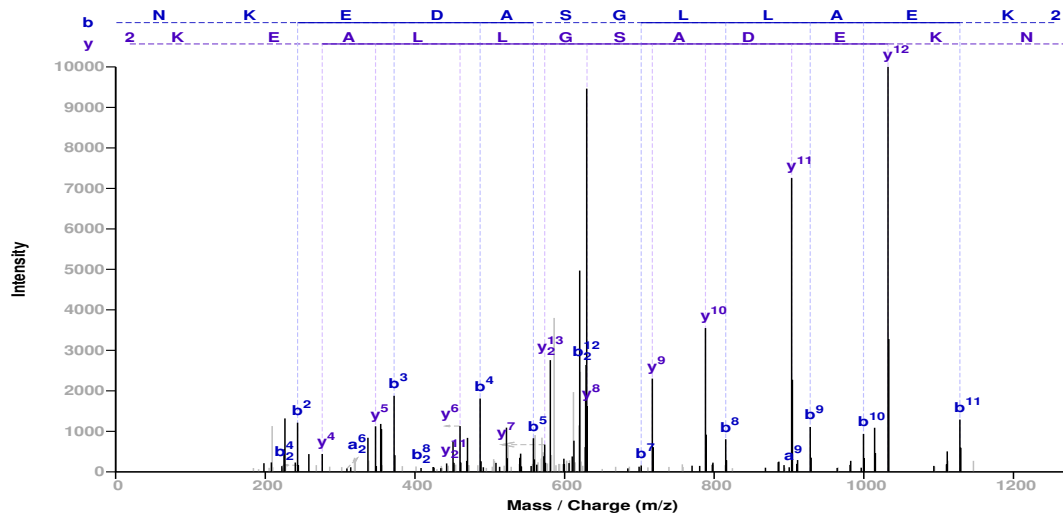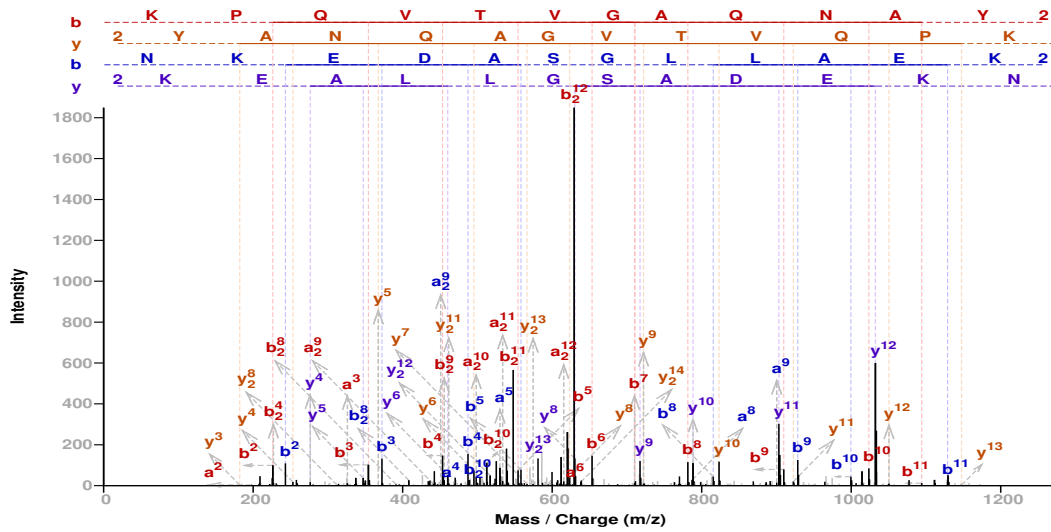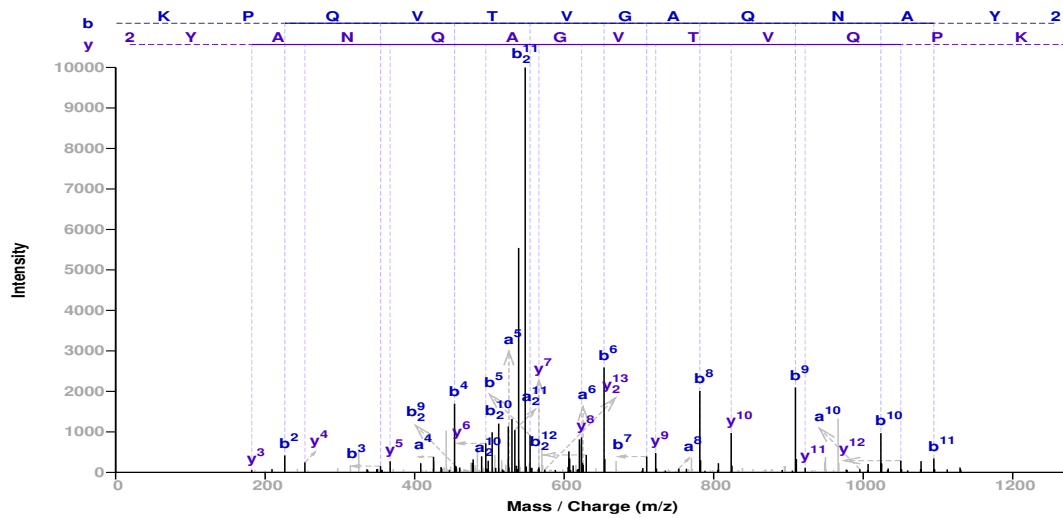

yeast1\_Scan\_Number\_3455 Precursor m/z: 483.749 cosine: 0.809  $\alpha$ : 0.424

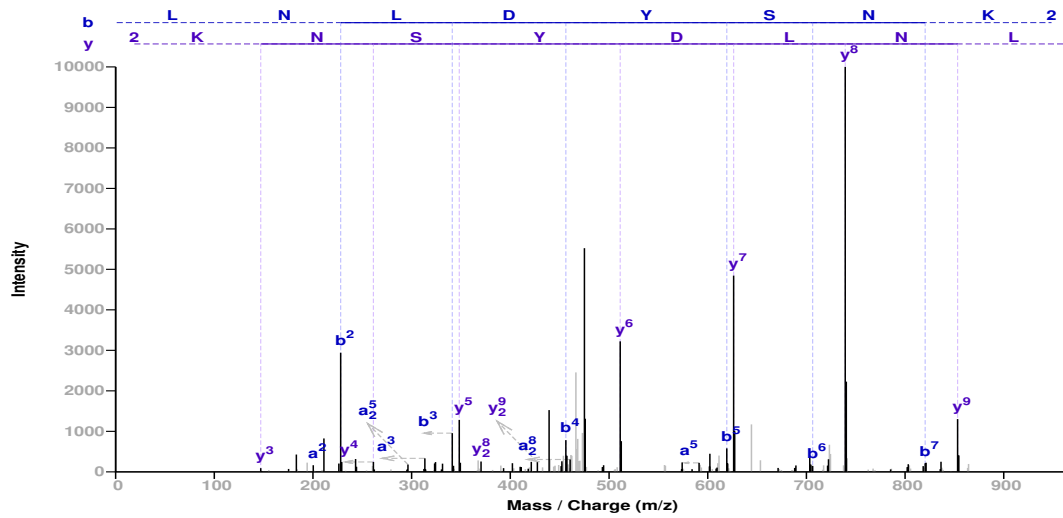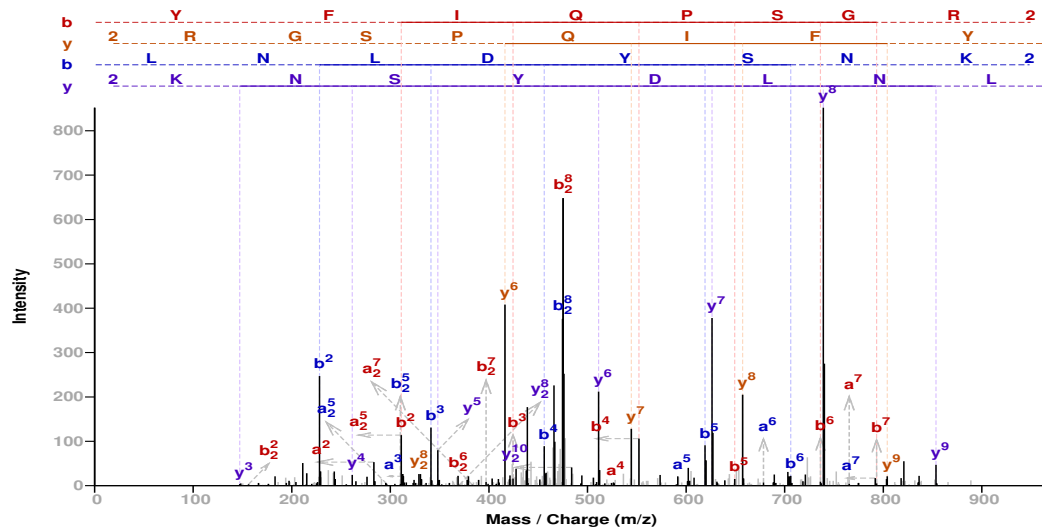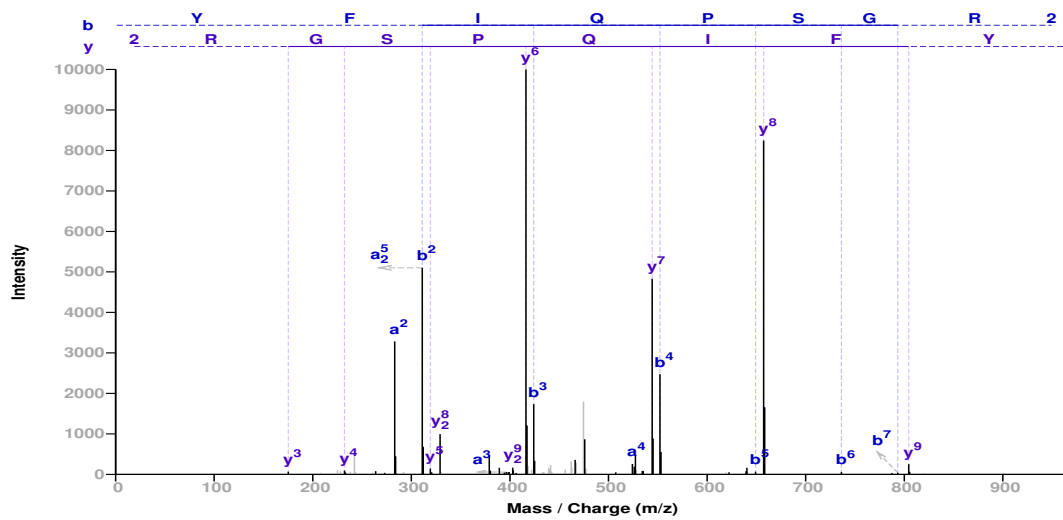

yeast1\_Scan\_Number\_8058 Precursor m/z: 751.452 cosine: 0.856  $\alpha$ : 0.420

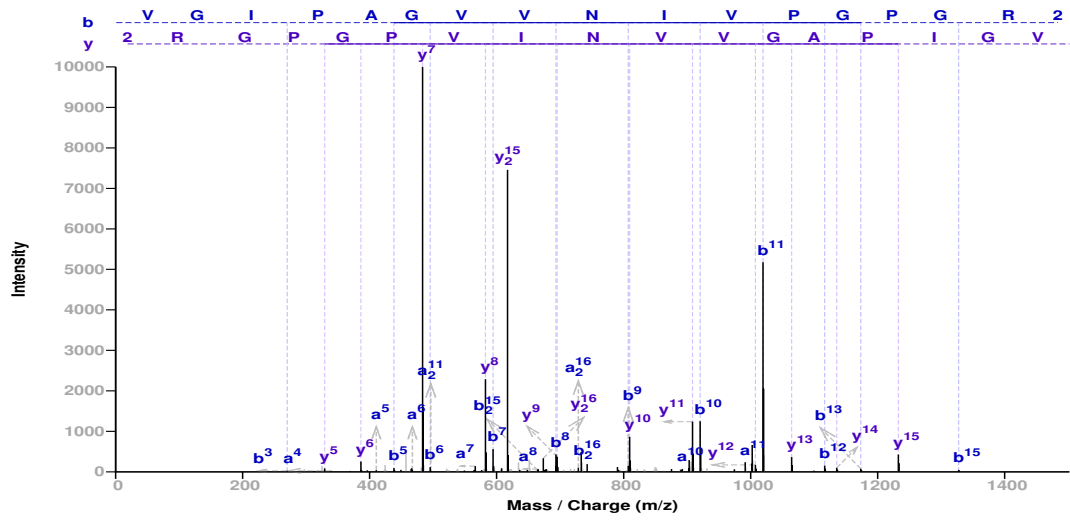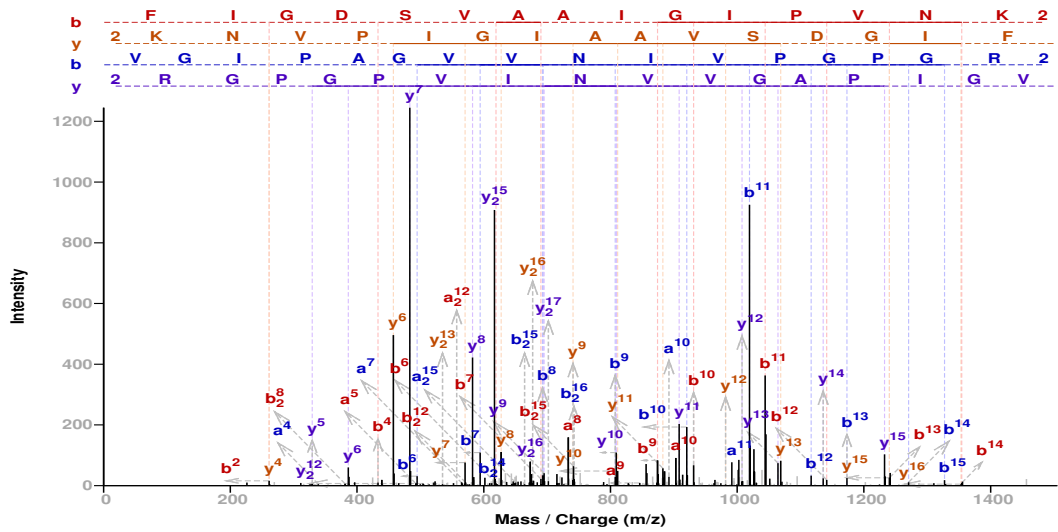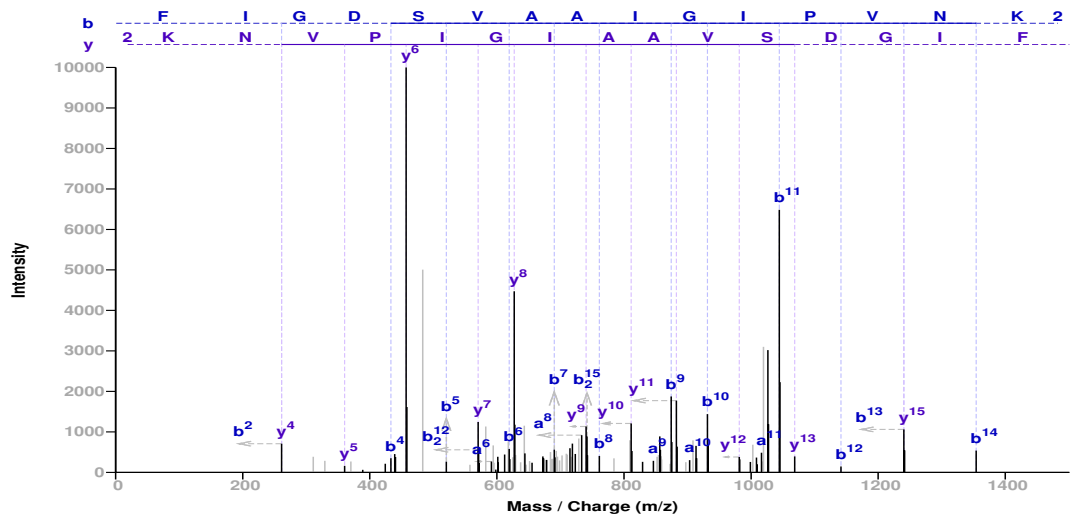



yeast1\_Scan\_Number\_2975 Precursor m/z: 580.310 cosine: 0.883  $\alpha$ : 0.415

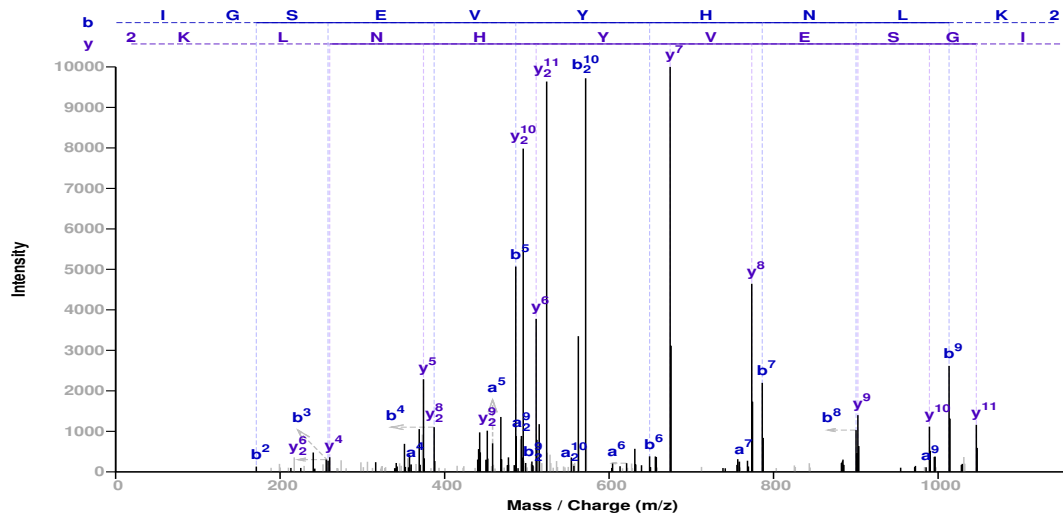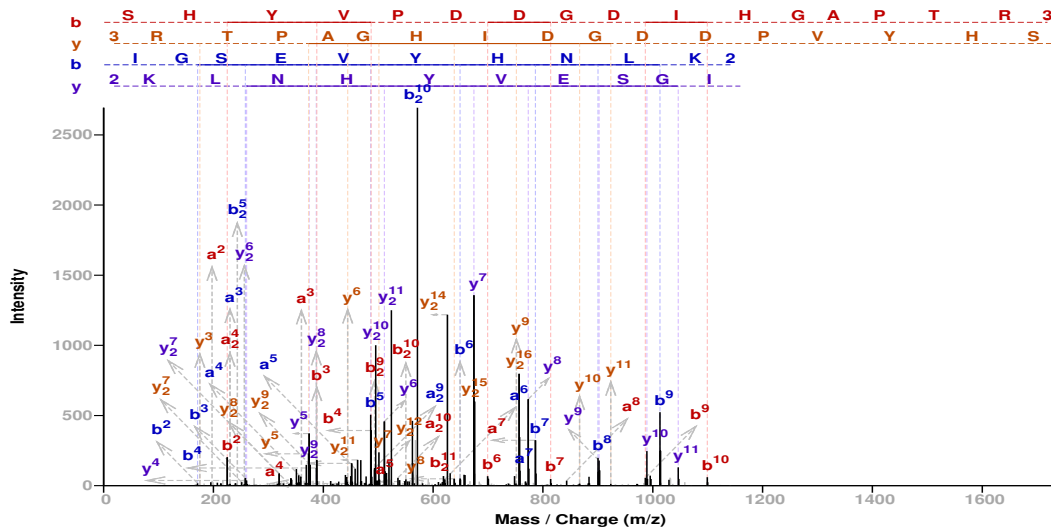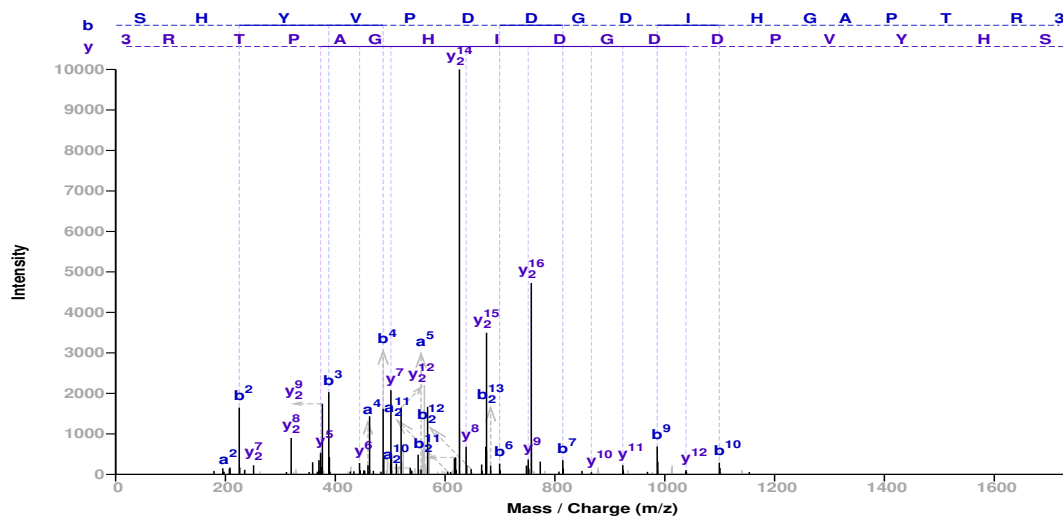

yeast1\_Scan\_Number\_2276 Precursor m/z: 440.724 cosine: 0.747  $\alpha$ : 0.412

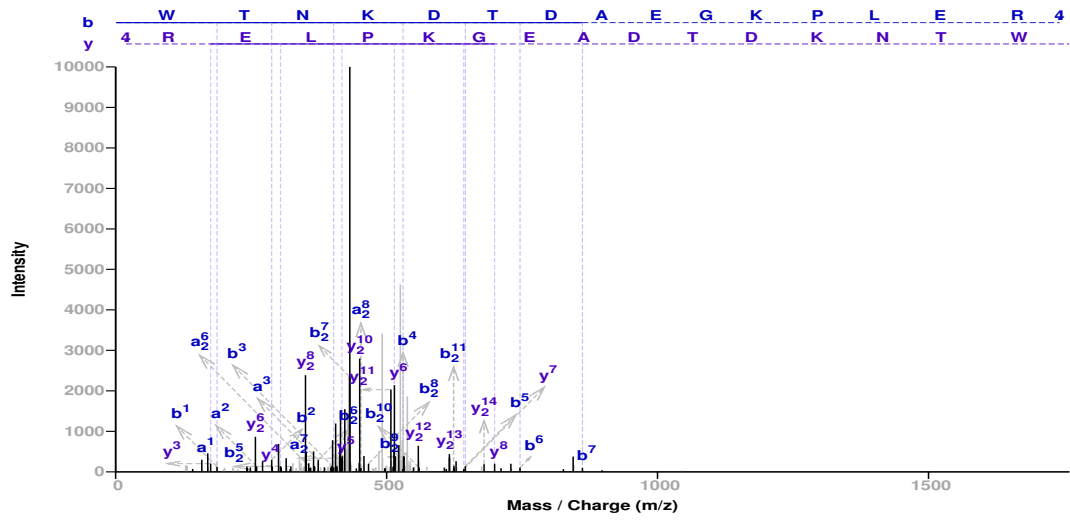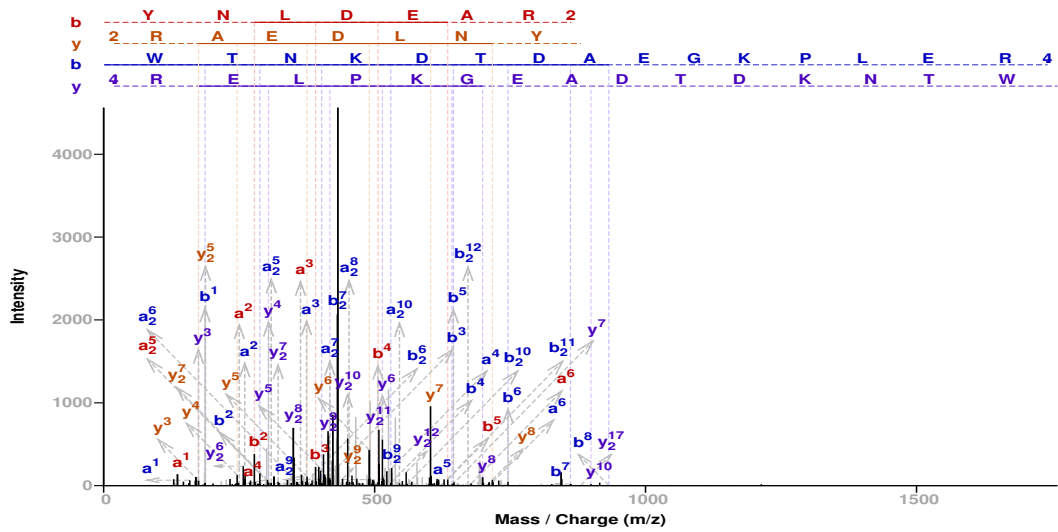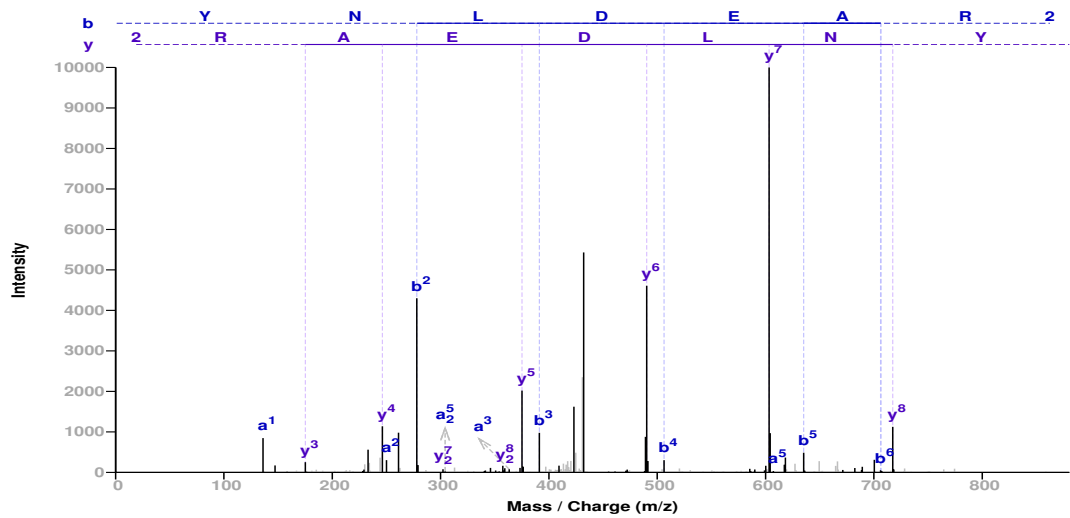

yeast1\_Scan\_Number\_6013 Precursor m/z: 722.890 cosine: 0.844  $\alpha$ : 0.412

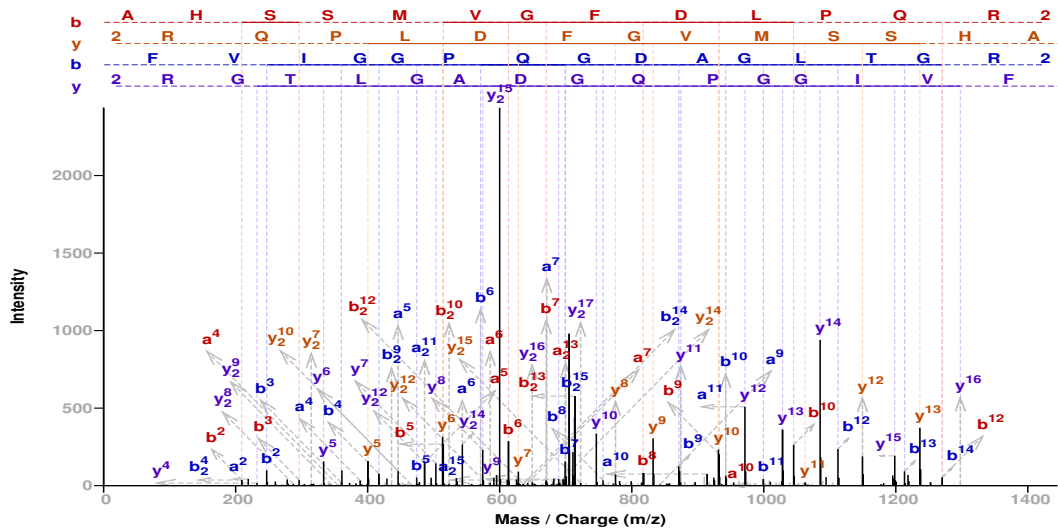

yeast1\_Scan\_Number\_5758 Precursor m/z: 556.299 cosine: 0.768  $\alpha$ : 0.410

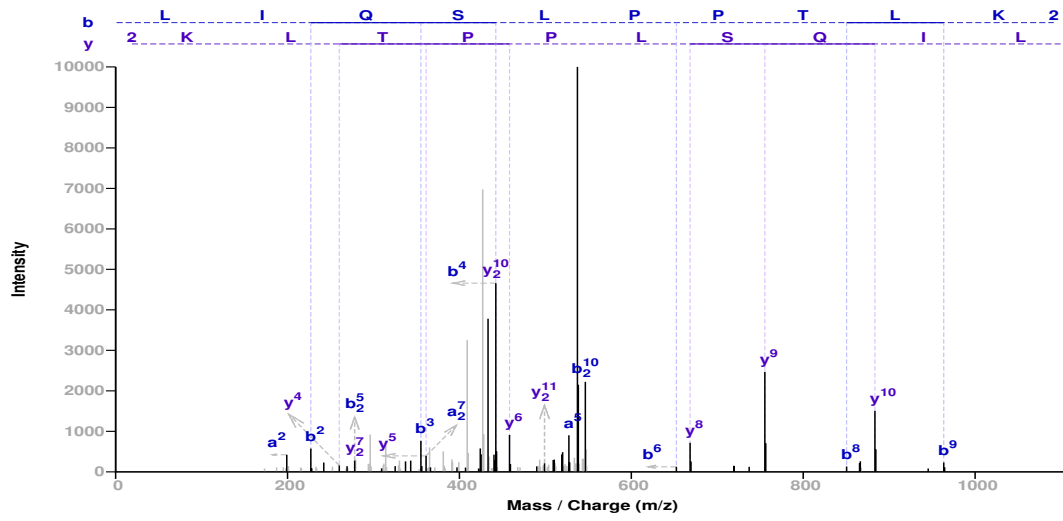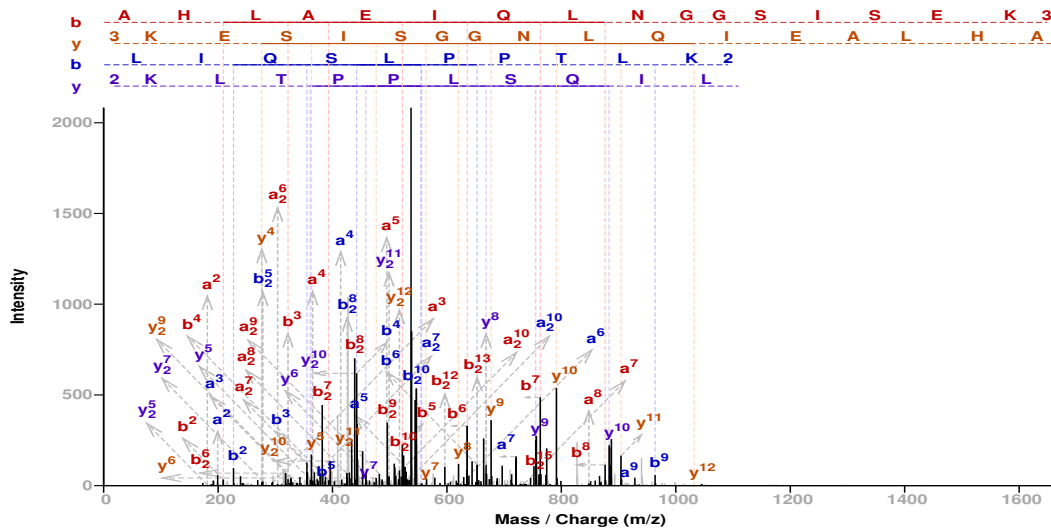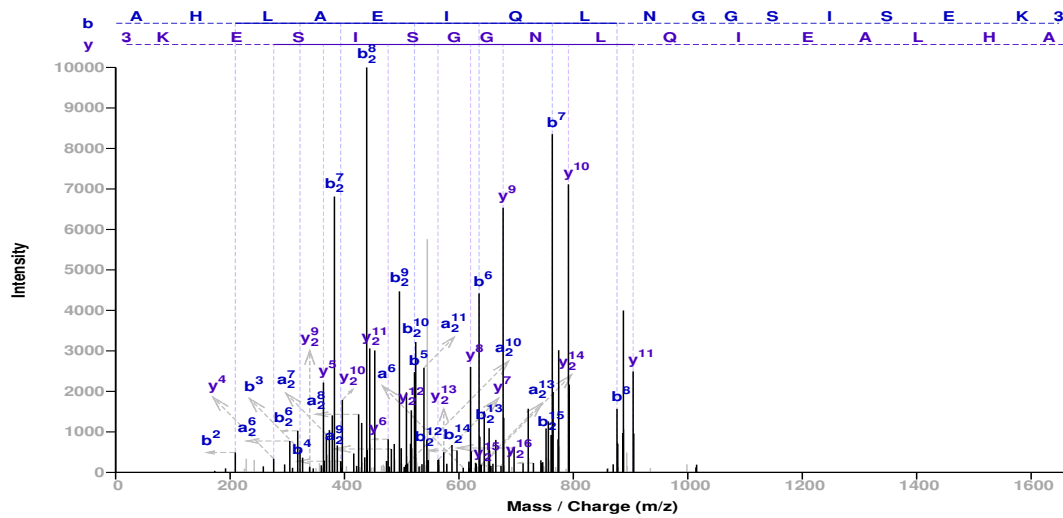

yeast1\_Scan\_Number\_3767 Precursor m/z: 480.763 cosine: 0.820  $\alpha$ : 0.408

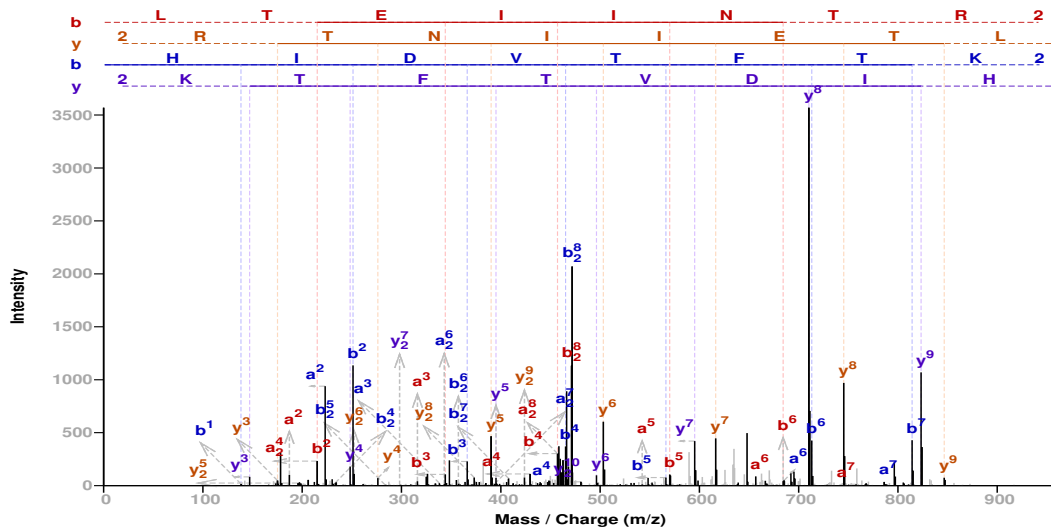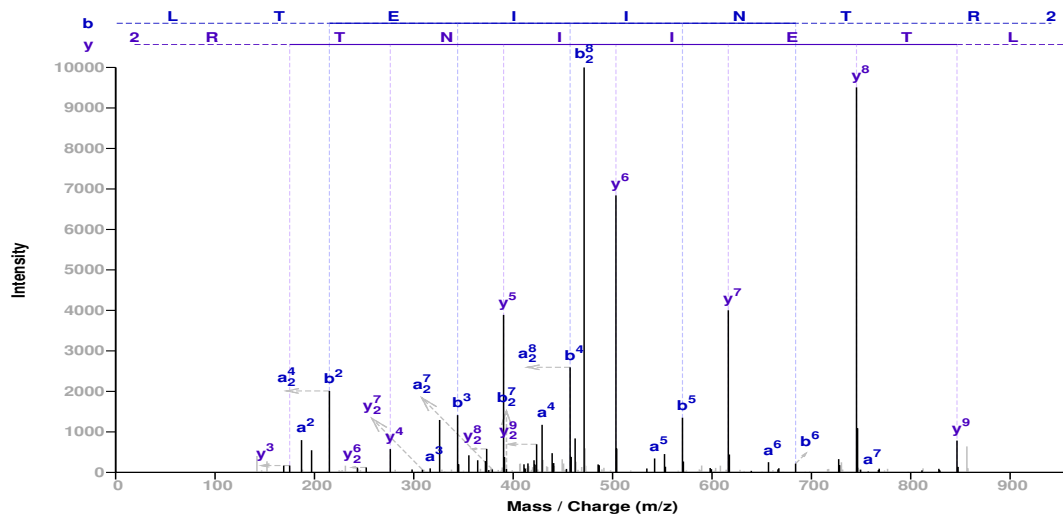

yeast1\_Scan\_Number\_4152 Precursor m/z: 636.347 cosine: 0.804  $\alpha$ : 0.402

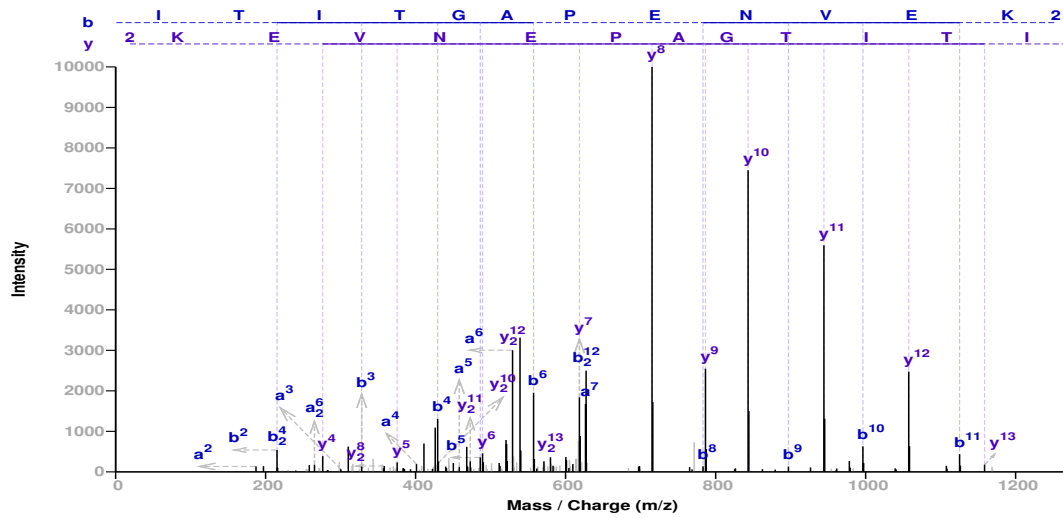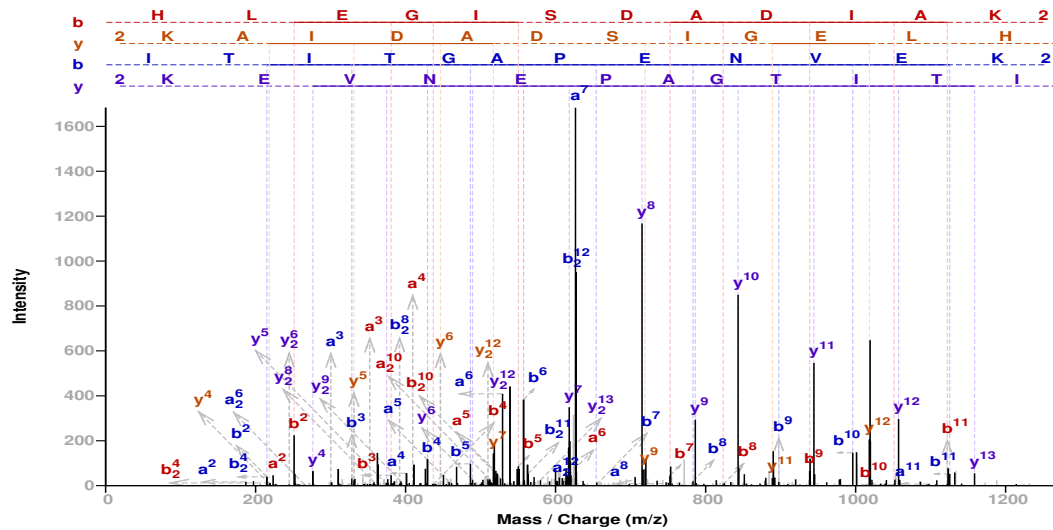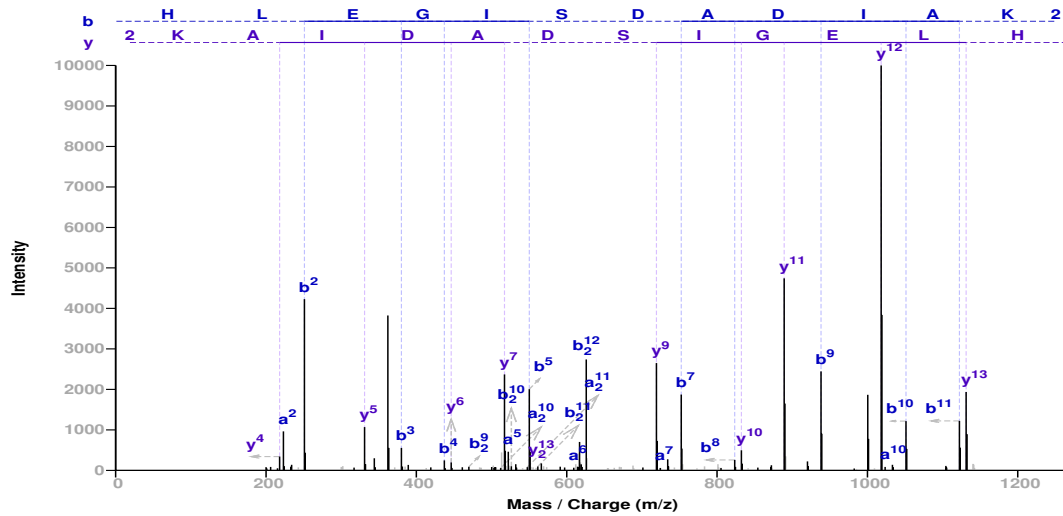

yeast1\_Scan\_Number\_6194 Precursor m/z: 390.719 cosine: 0.853  $\alpha$ : 0.399

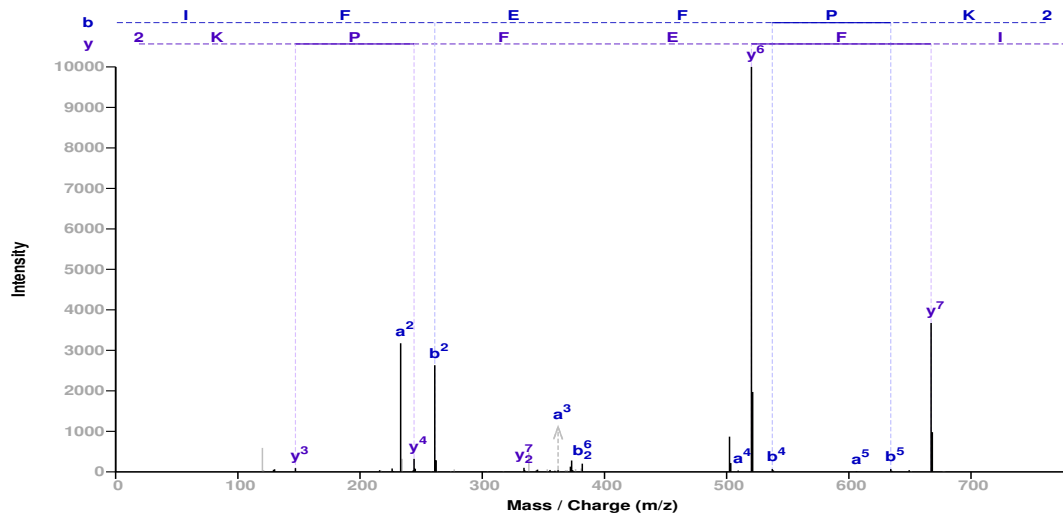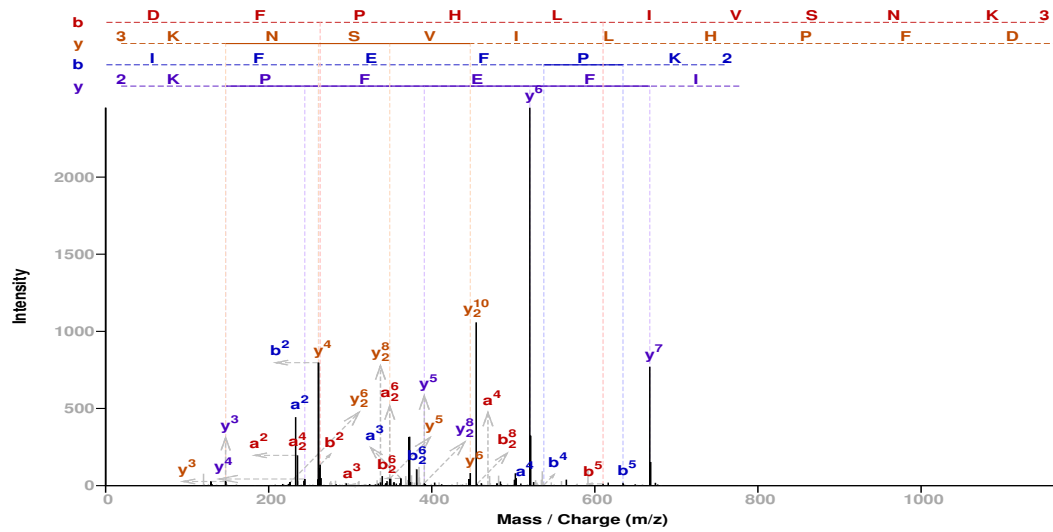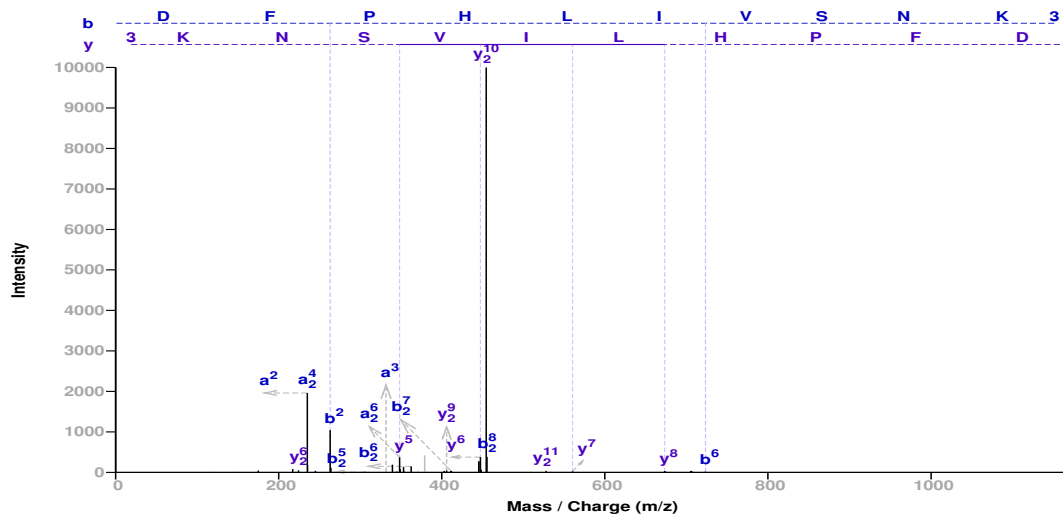

yeast1\_Scan\_Number\_5528 Precursor m/z: 558.794 cosine: 0.784  $\alpha$ : 0.397

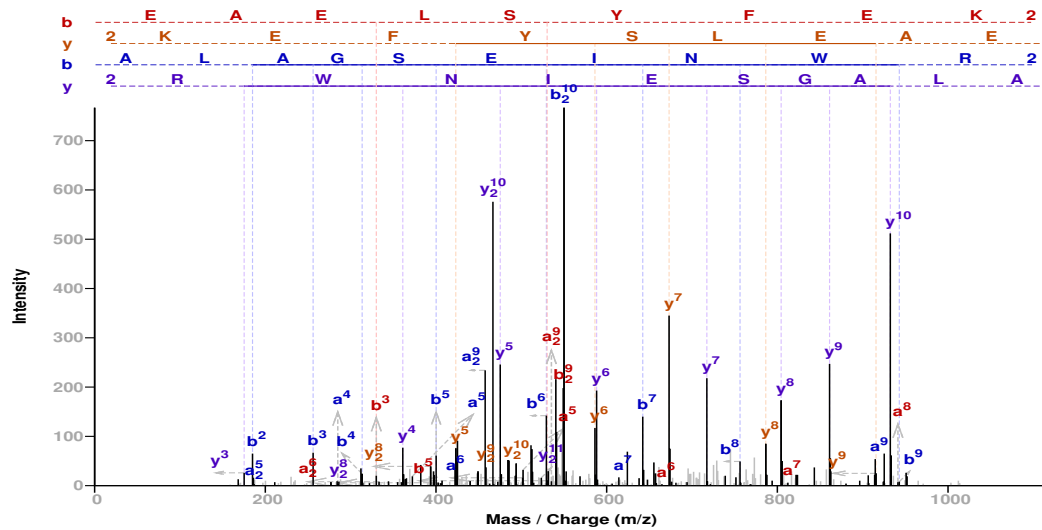



yeast1\_Scan\_Number.1605 Precursor m/z: 365.230 cosine: 0.861  $\alpha$ : 0.392

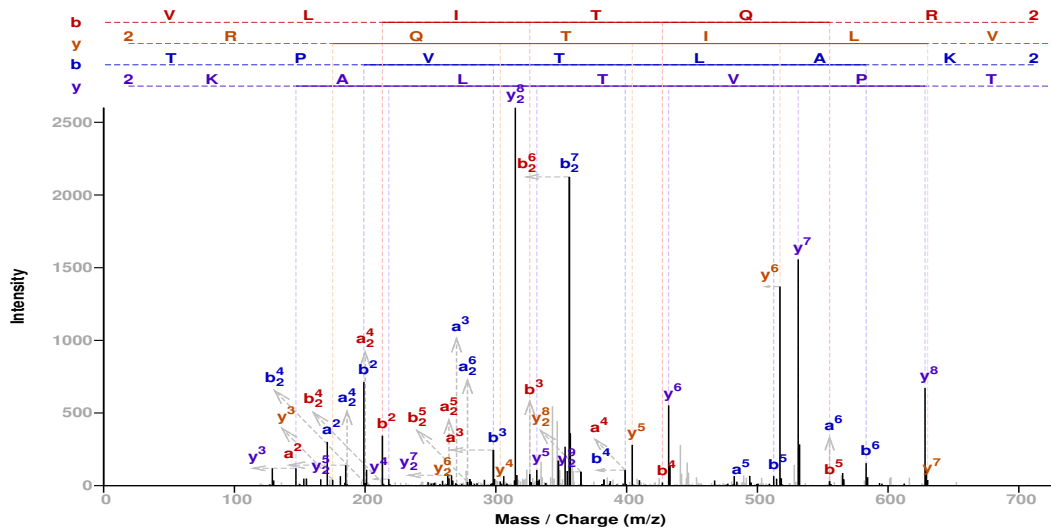

yeast1\_Scan\_Number\_3800 Precursor m/z: 347.199 cosine: 0.751  $\alpha$ : 0.385

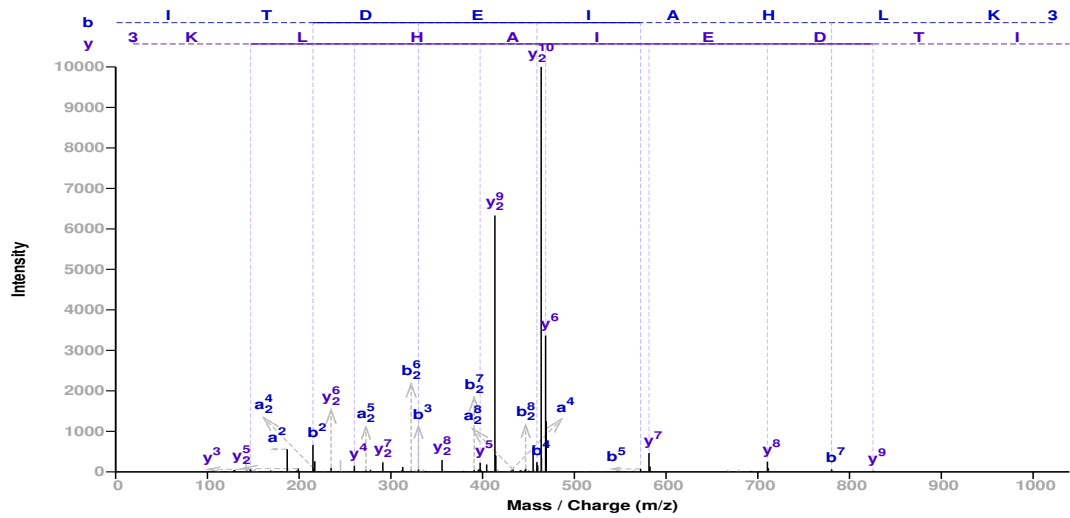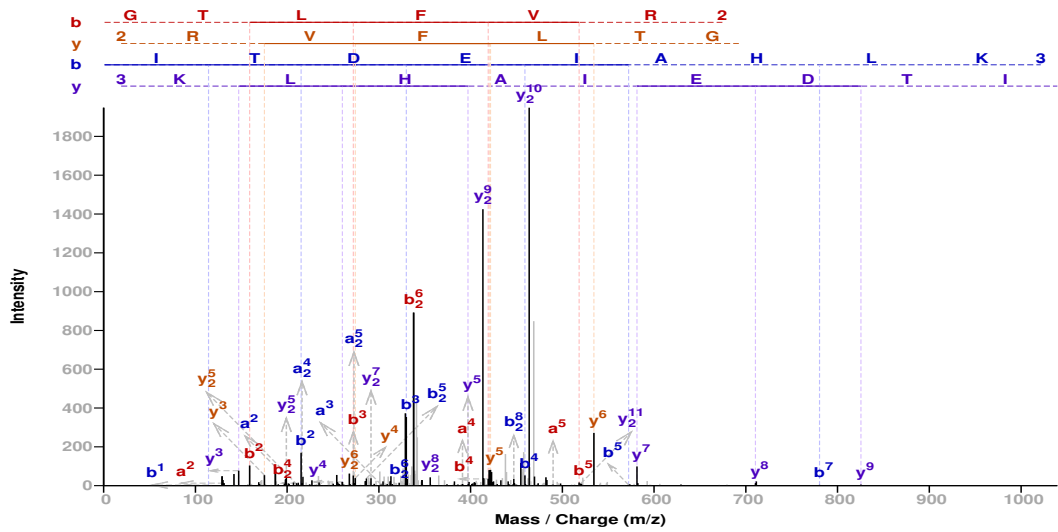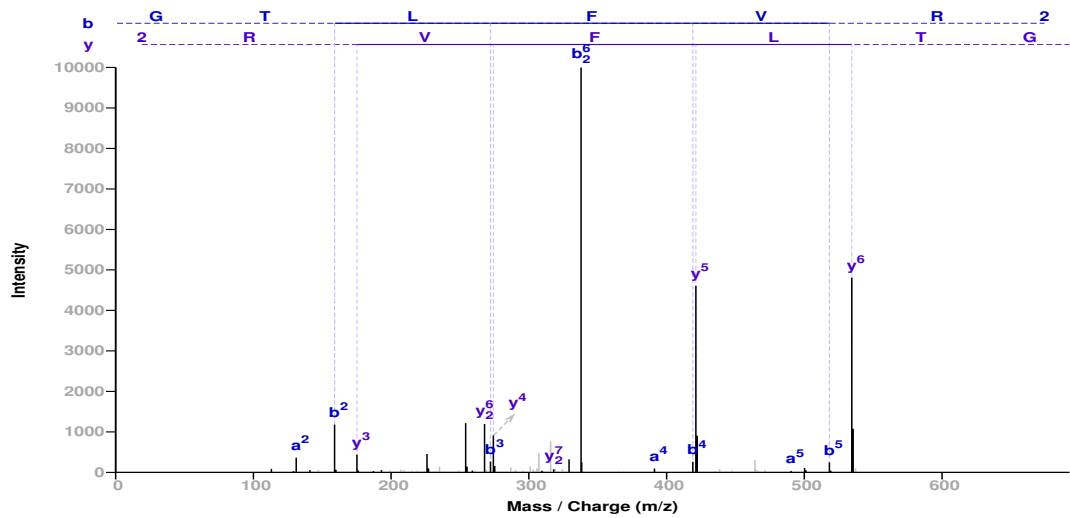

yeast1\_Scan\_Number\_4468 Precursor m/z: 538.295 cosine: 0.785  $\alpha$ : 0.384

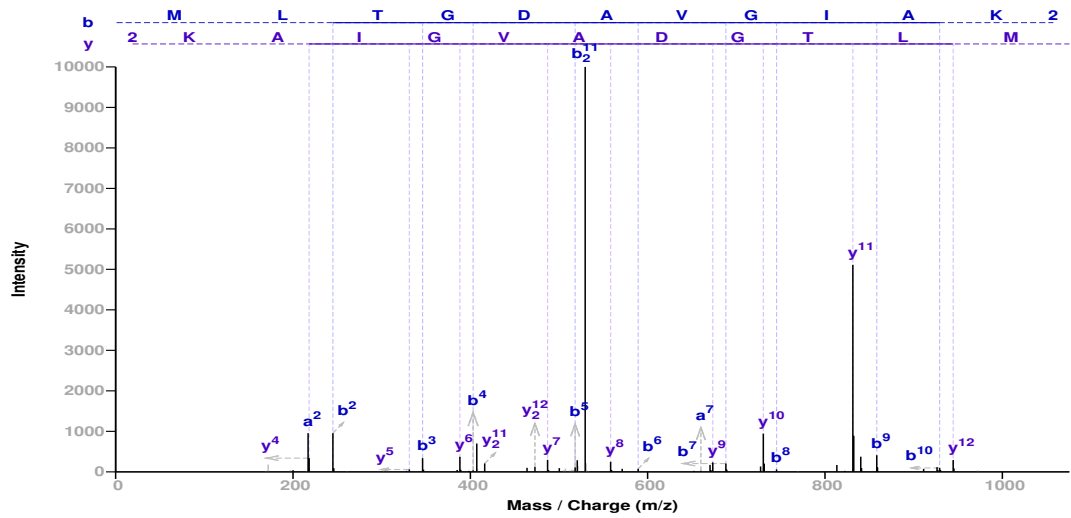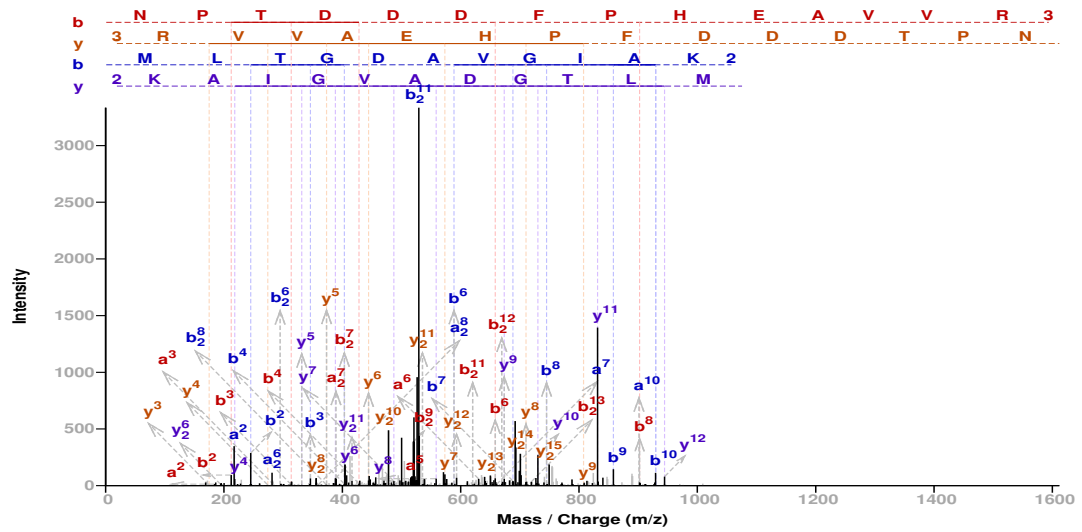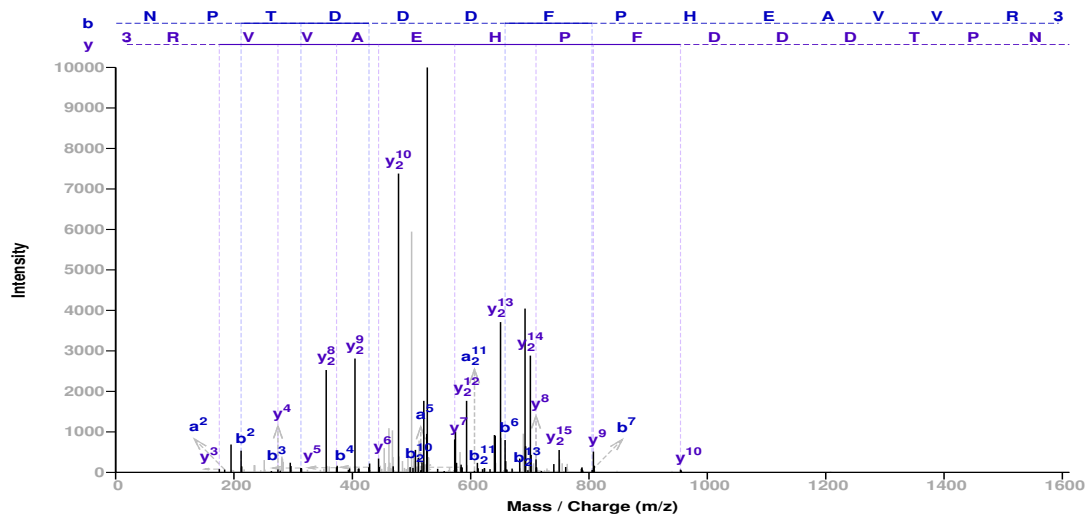

yeast1\_Scan\_Number\_4253 Precursor m/z: 554.823 cosine: 0.836  $\alpha$ : 0.372

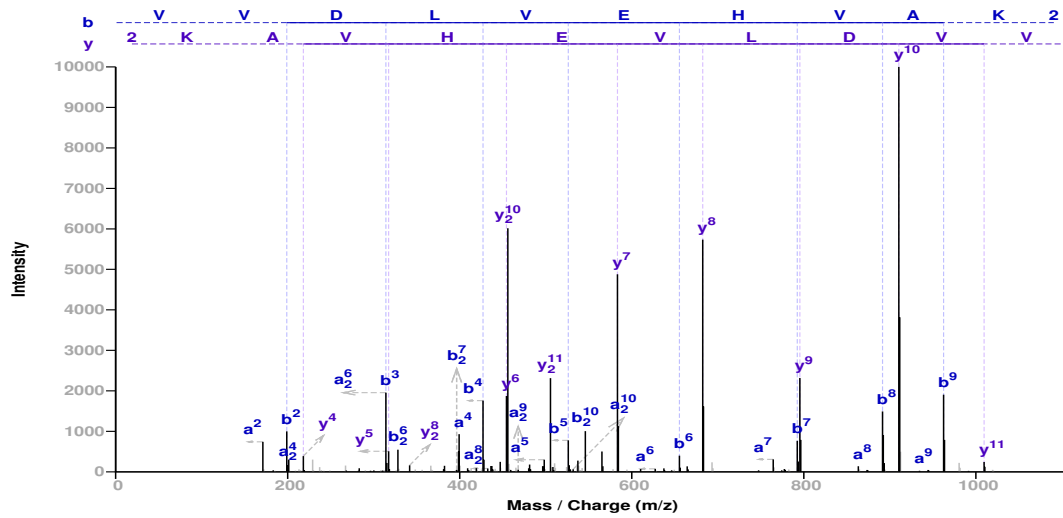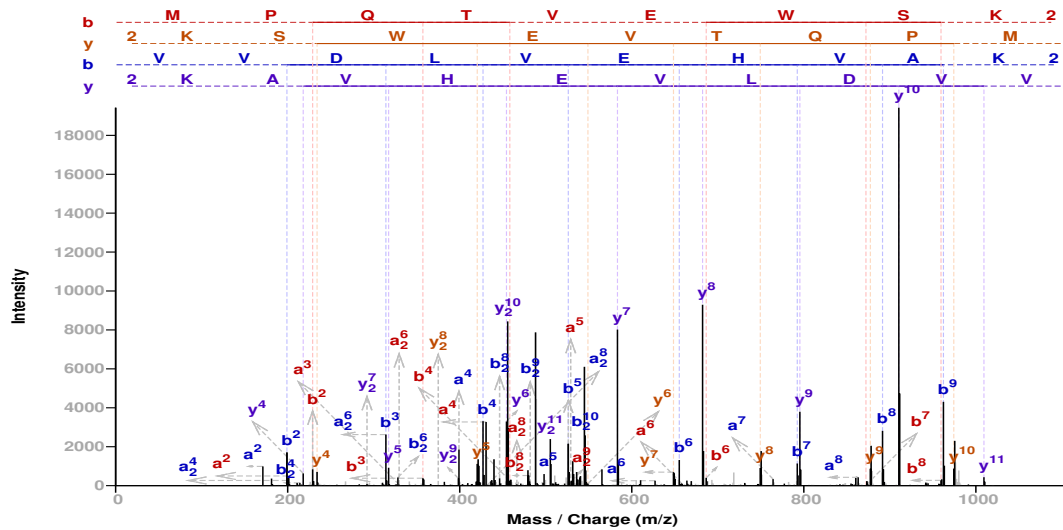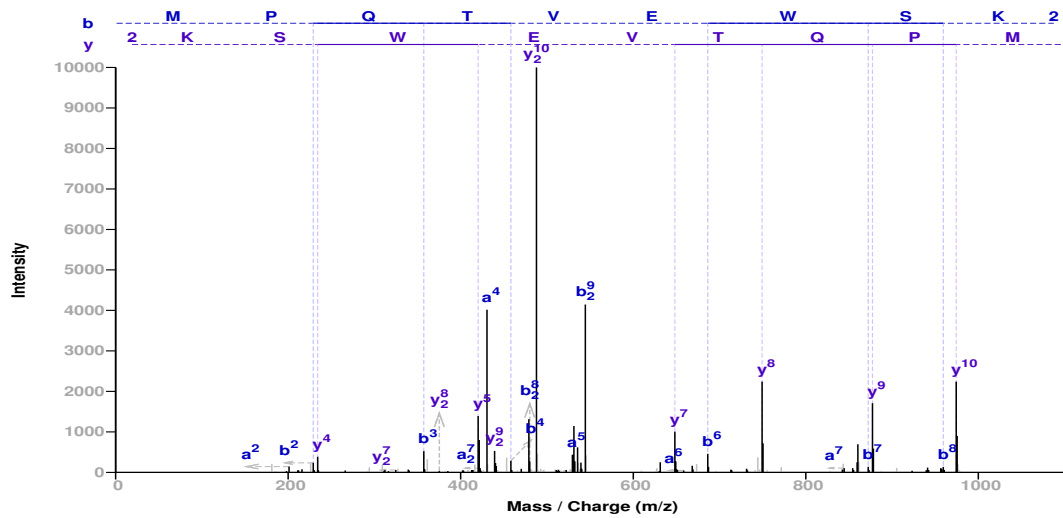

yeast1\_Scan\_Number\_5725 Precursor m/z: 559.316 cosine: 0.781  $\alpha$ : 0.363

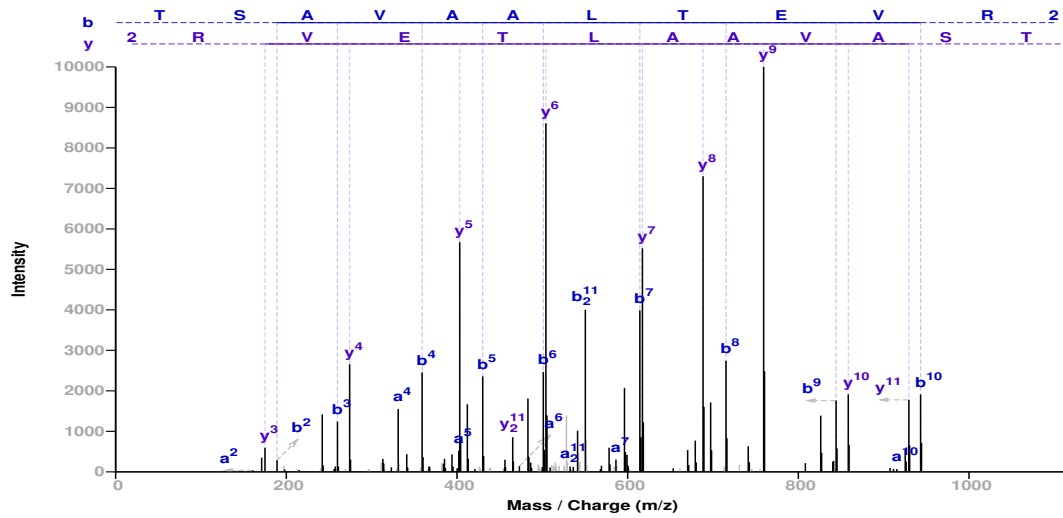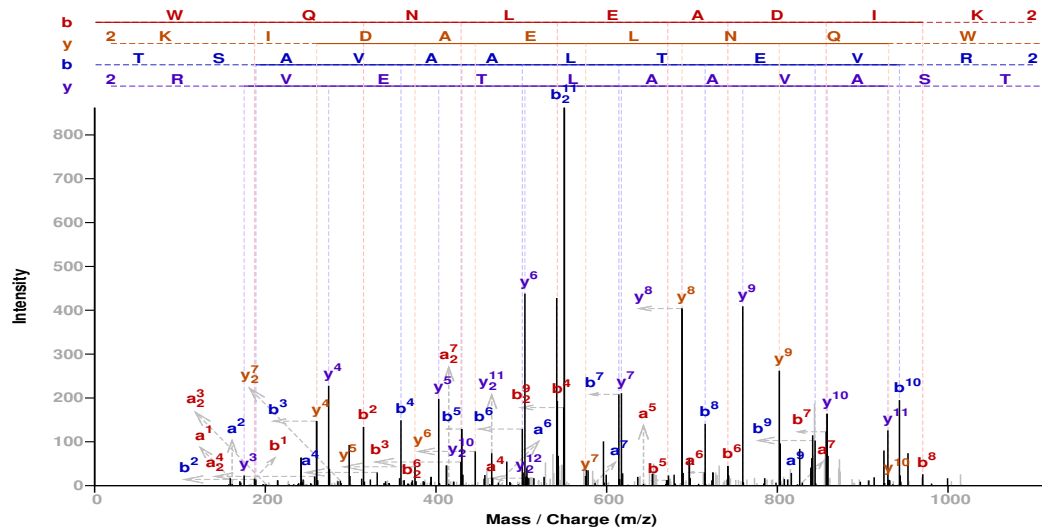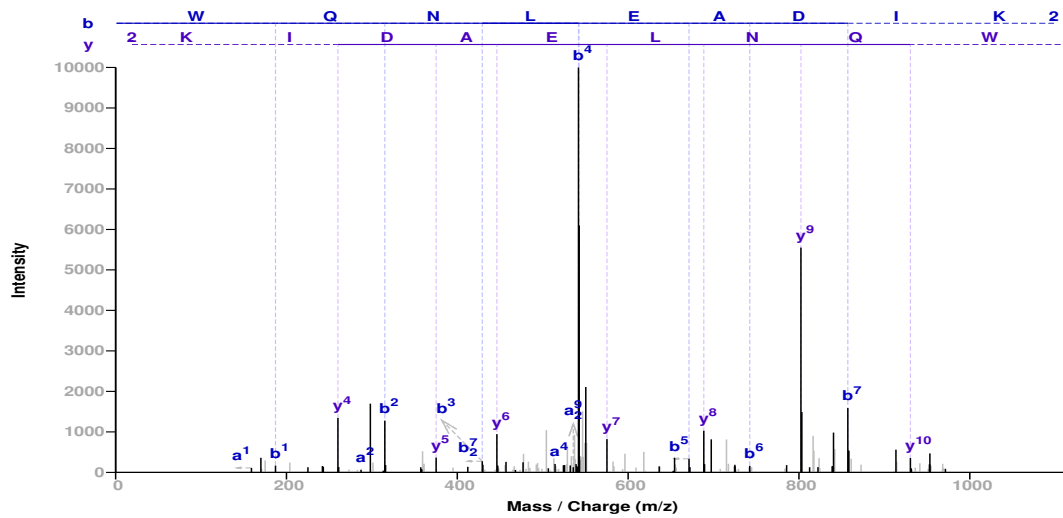

yeast1\_Scan\_Number\_6276 Precursor m/z: 483.606 cosine: 0.768  $\alpha$ : 0.361

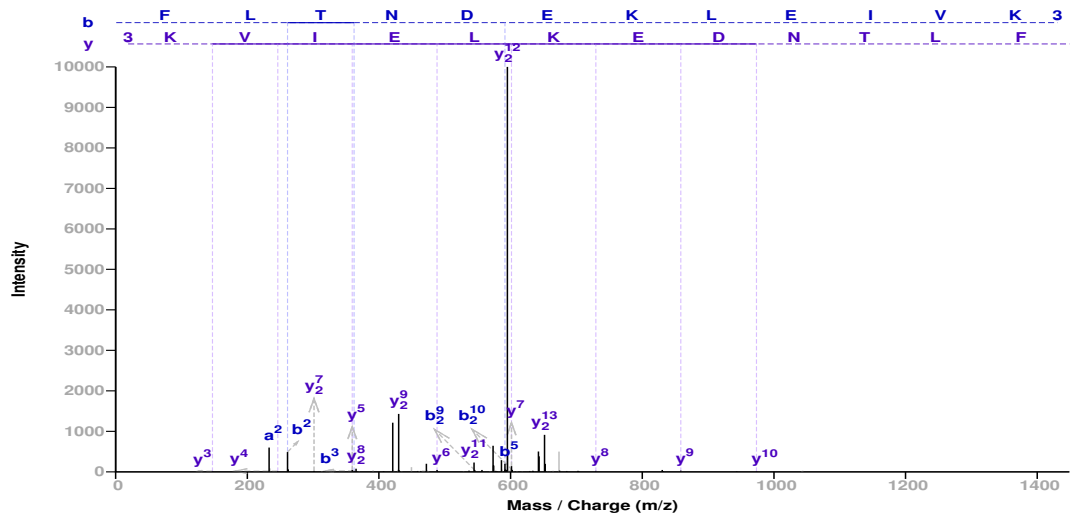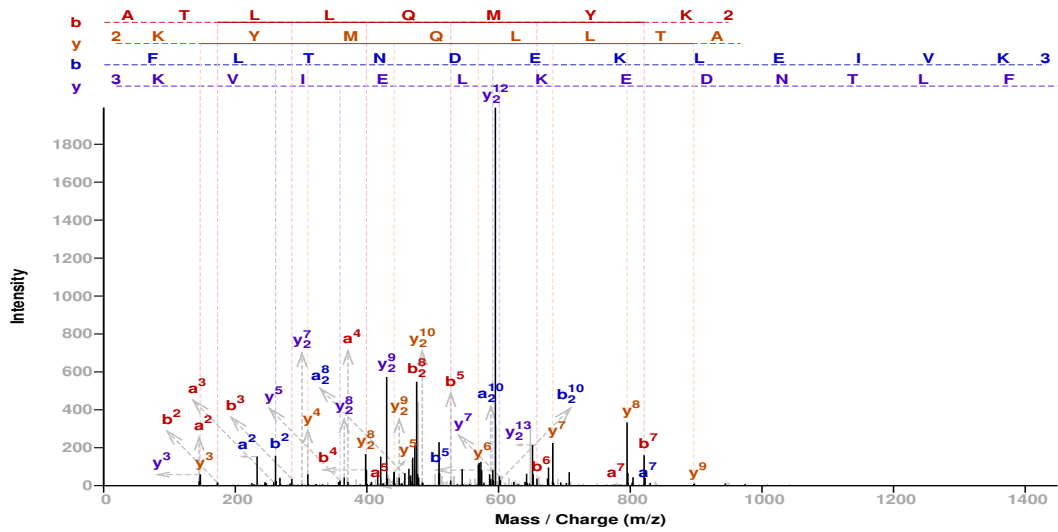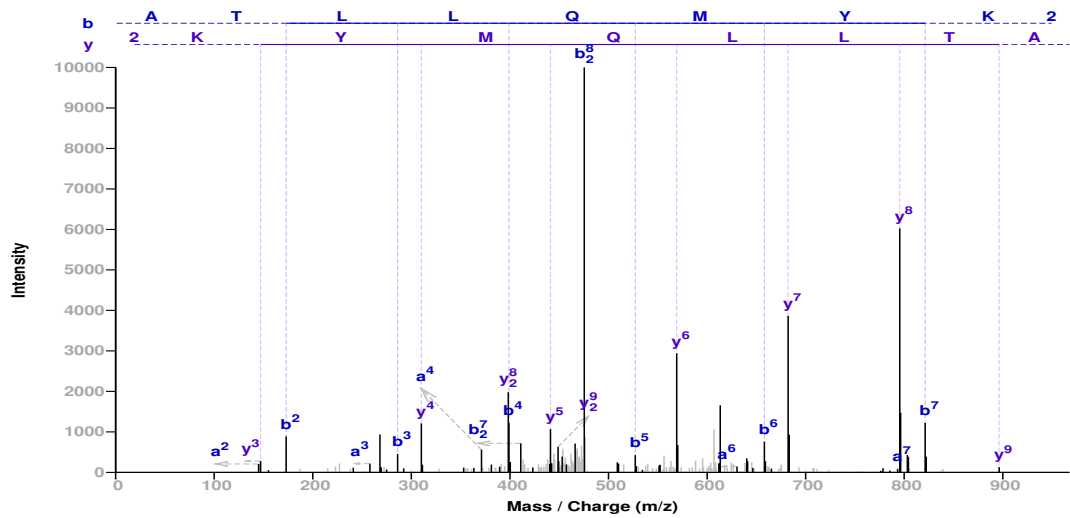

yeast1\_Scan\_Number\_6902 Precursor m/z: 446.759 cosine: 0.848  $\alpha$ : 0.359

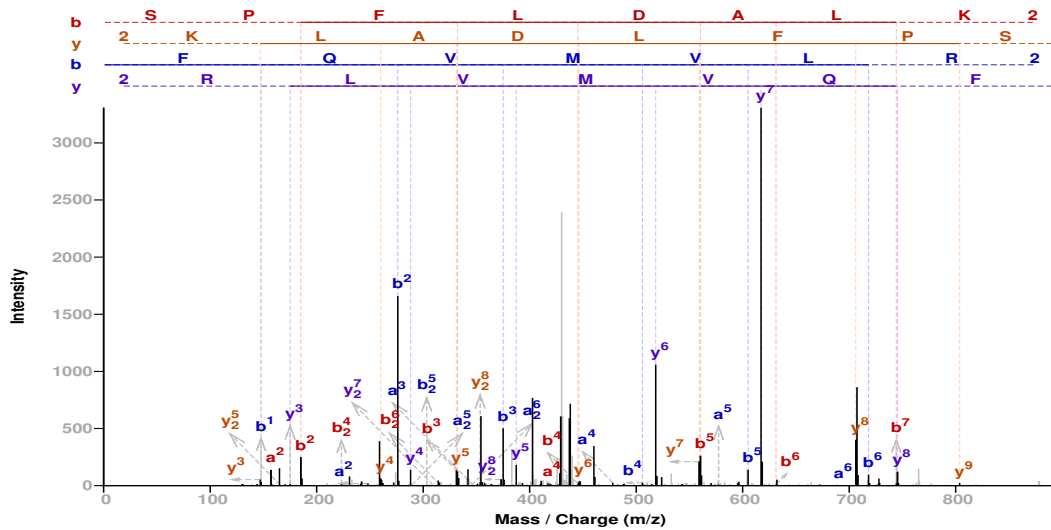

yeast1\_Scan\_Number\_5906 Precursor m/z: 815.374 cosine: 0.749  $\alpha$ : 0.358

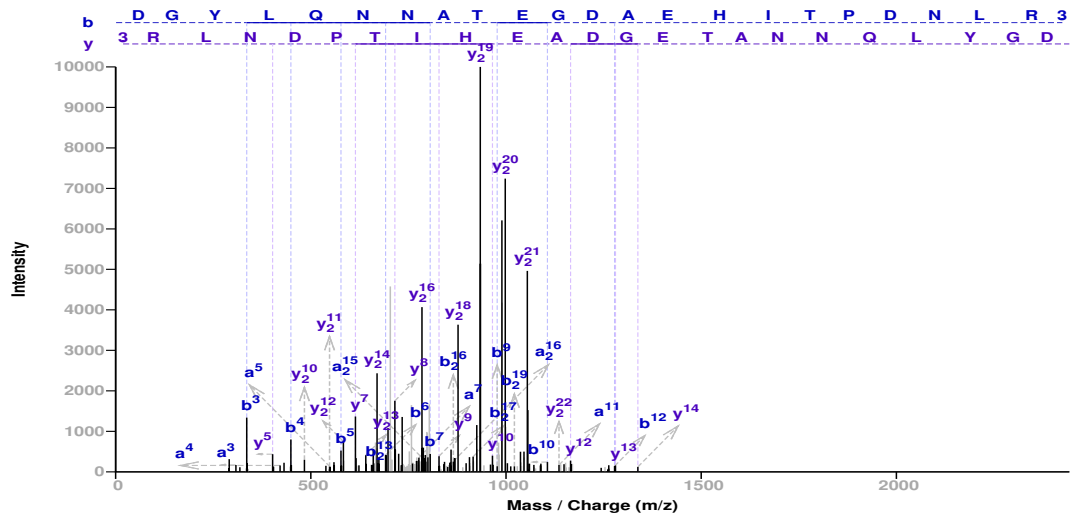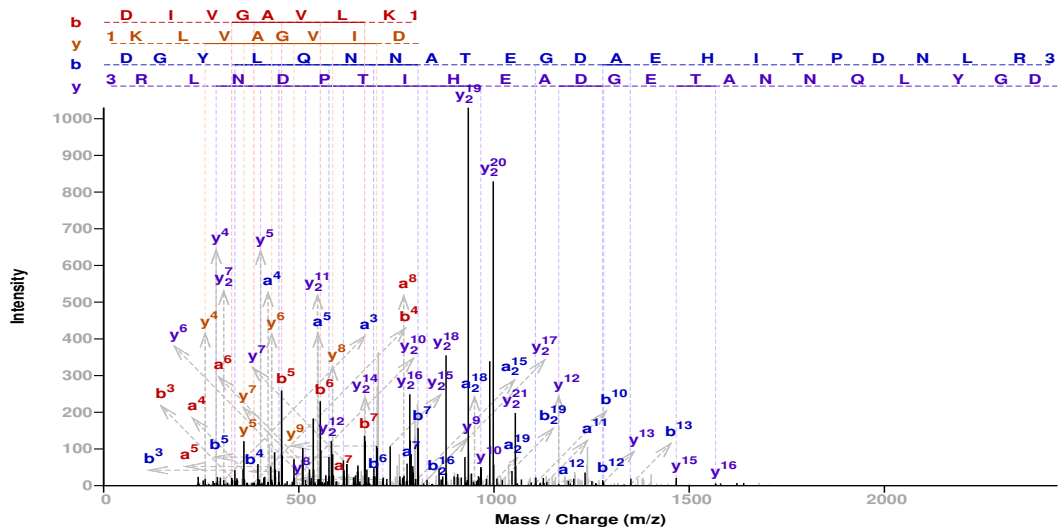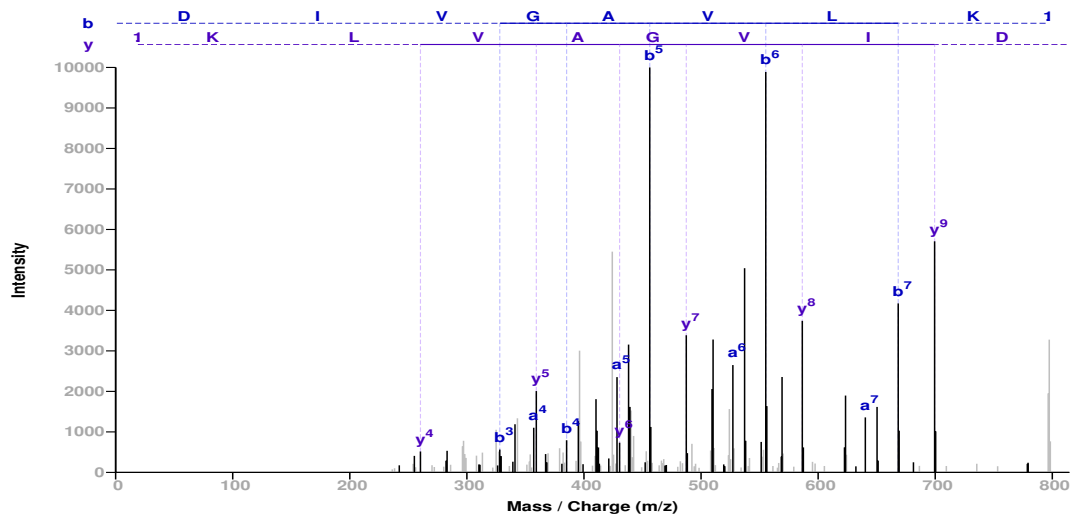



yeast1\_Scan\_Number\_3341 Precursor m/z: 435.212 cosine: 0.818  $\alpha$ : 0.355

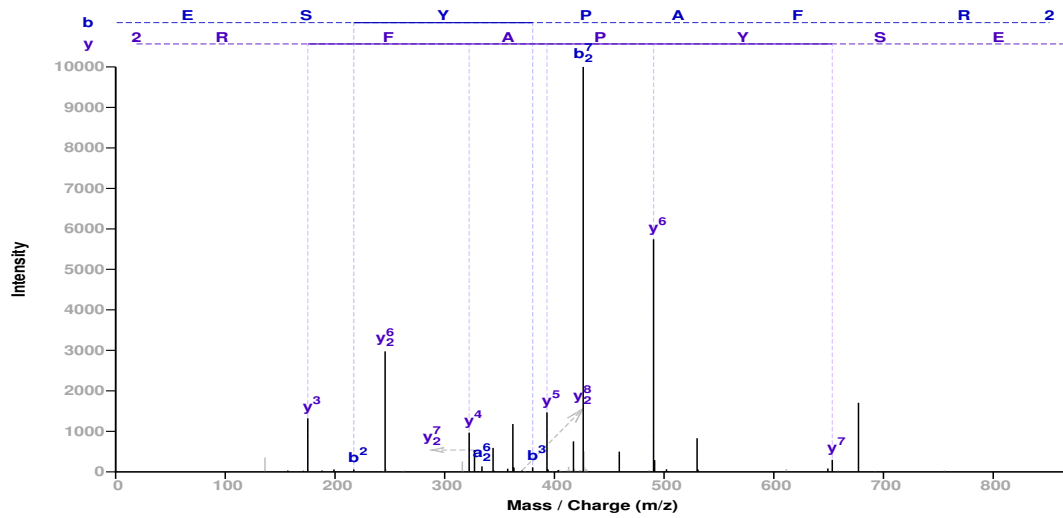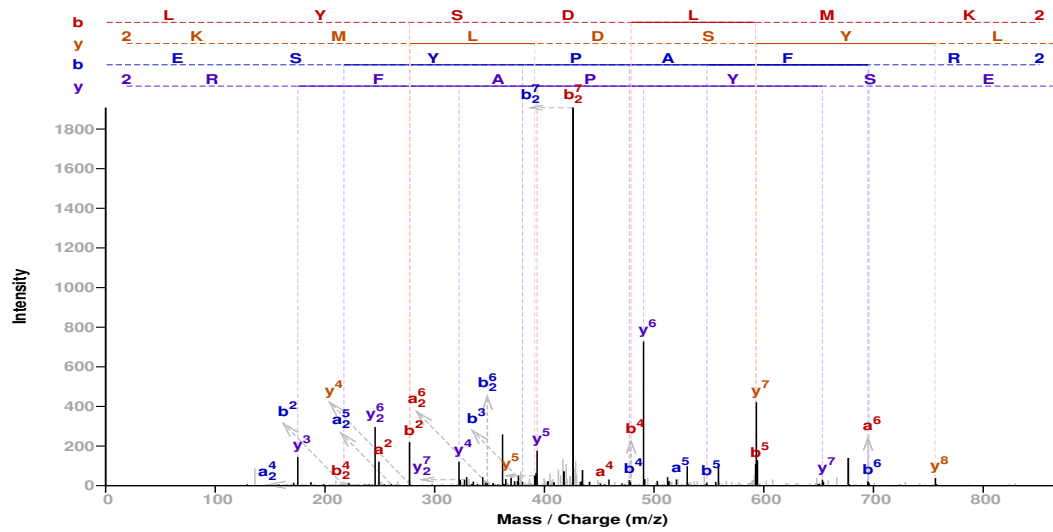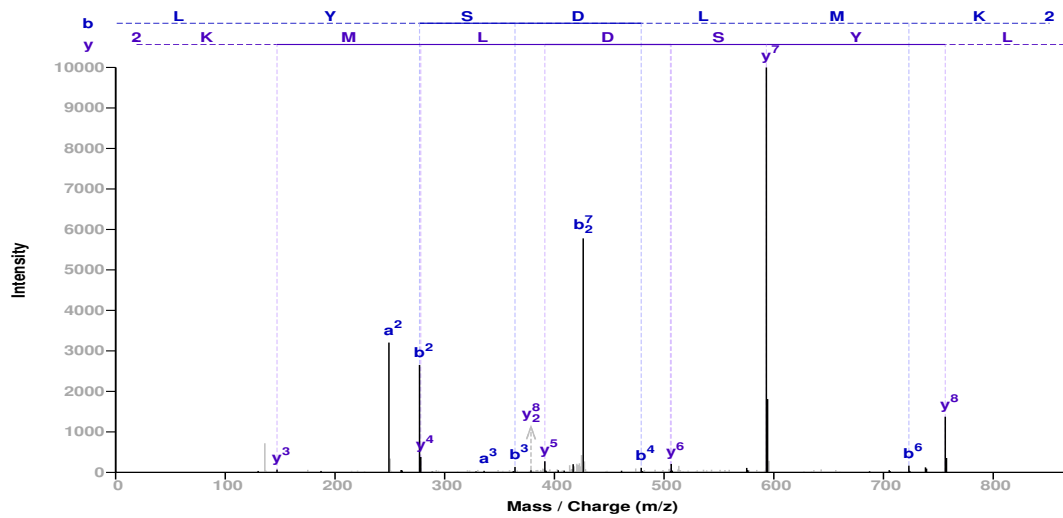

yeast1\_Scan\_Number.1836 Precursor m/z: 388.220 cosine: 0.895  $\alpha$ : 0.350

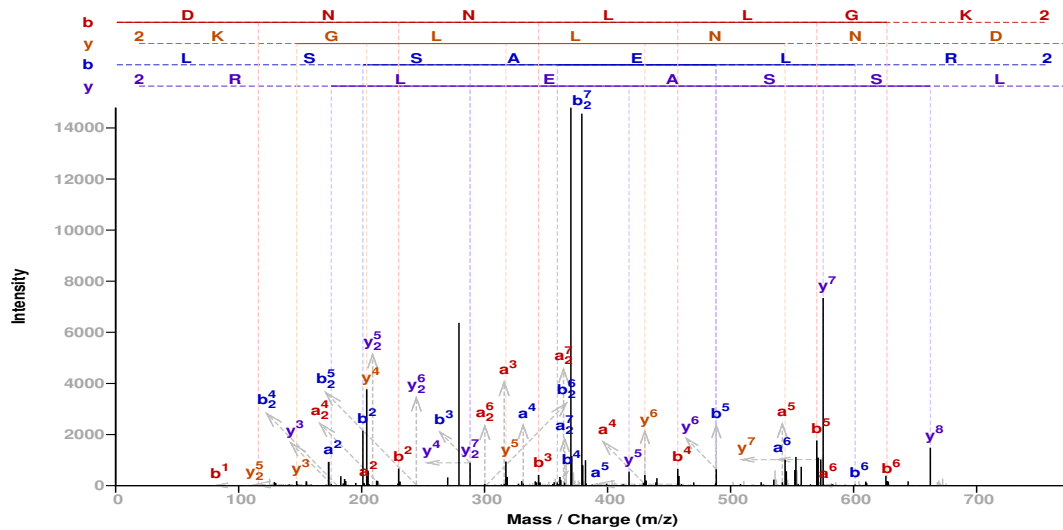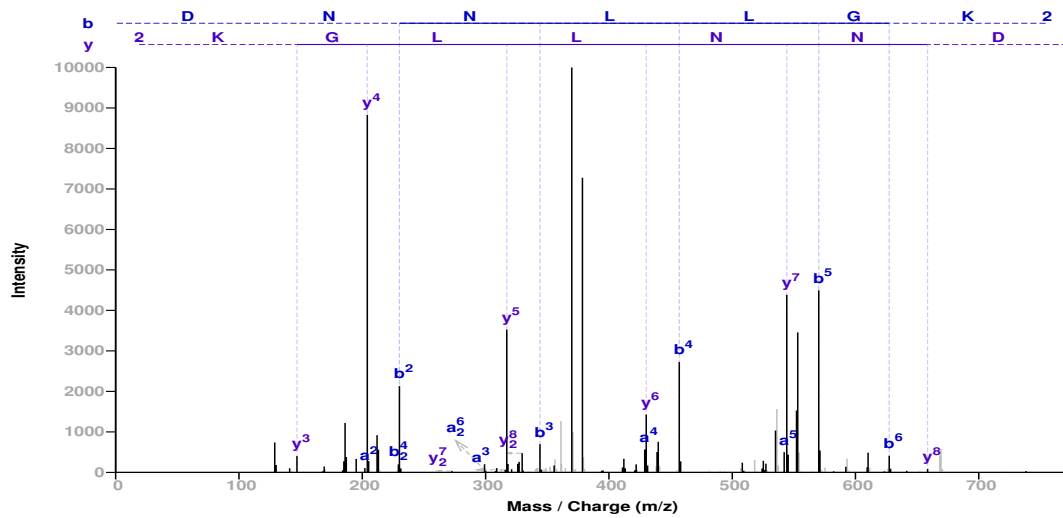

yeast1\_Scan\_Number\_2936 Precursor m/z: 570.268 cosine: 0.787  $\alpha$ : 0.349

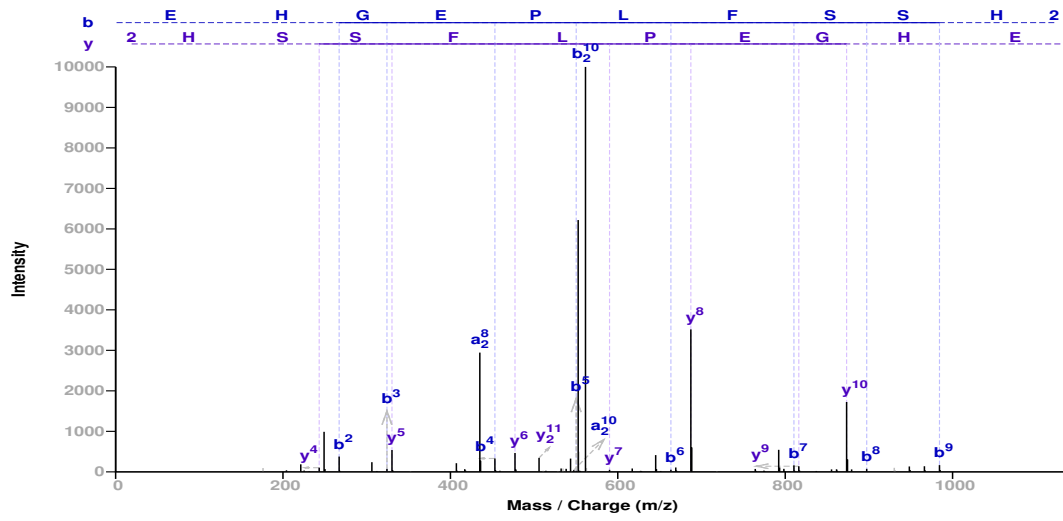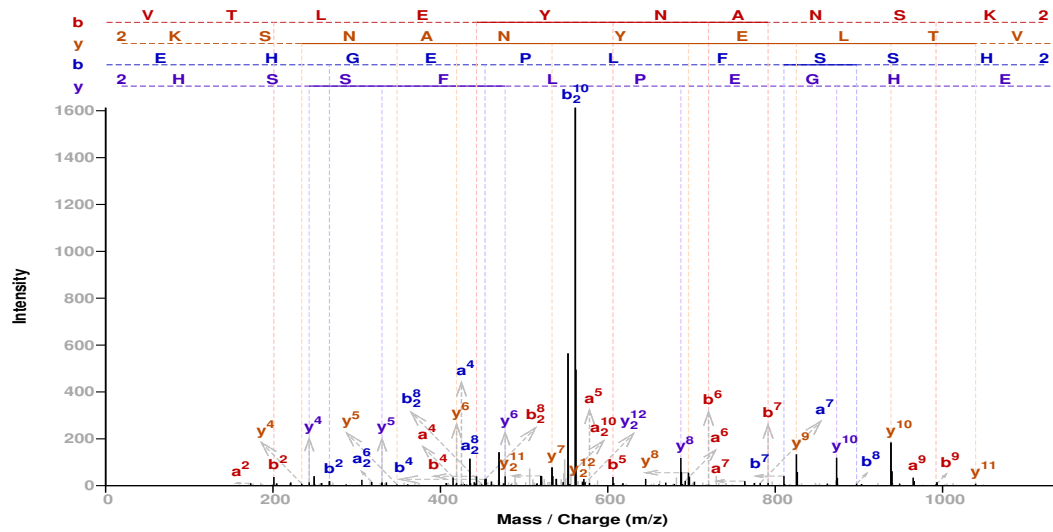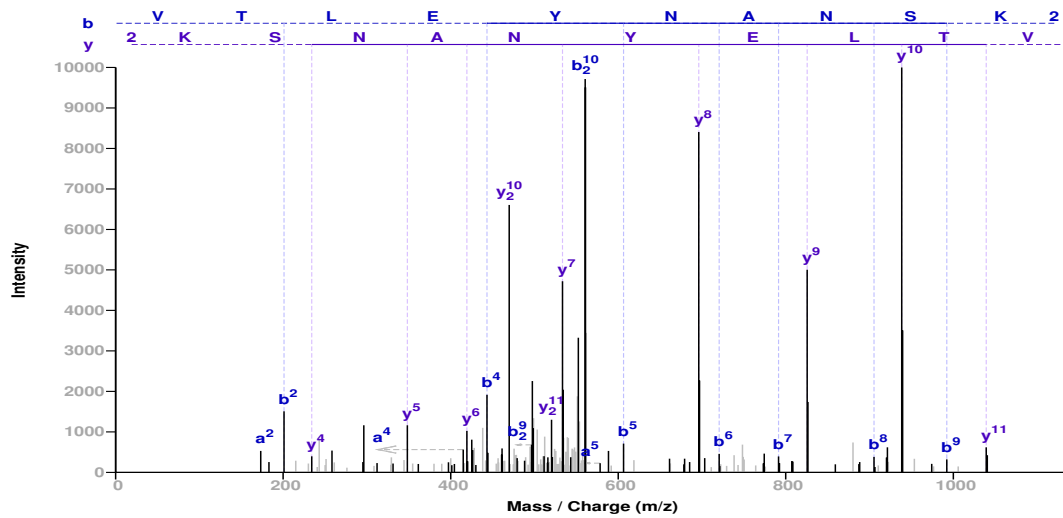

yeast1\_Scan\_Number\_914 Precursor m/z: 520.265 cosine: 0.838  $\alpha$ : 0.345

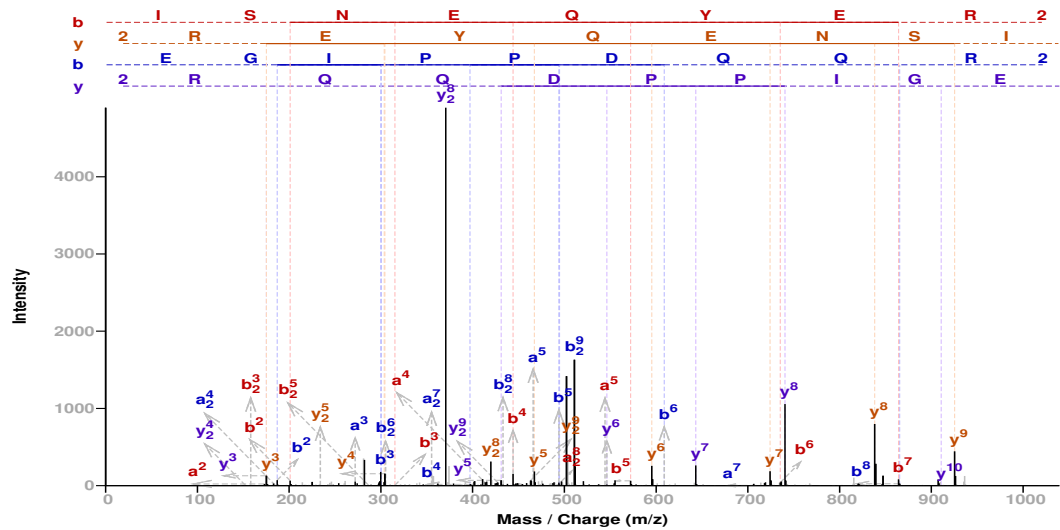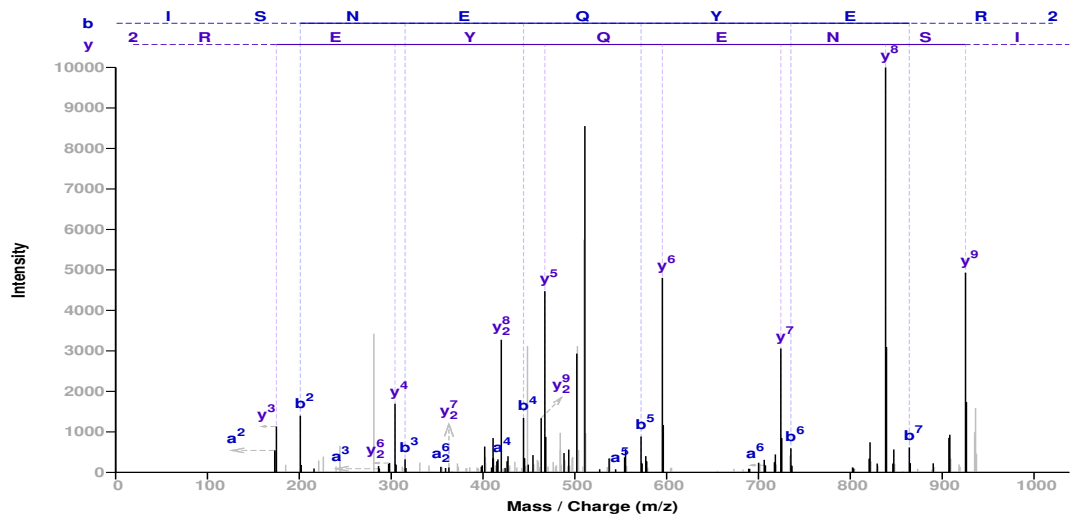



yeast1\_Scan\_Number\_6229 Precursor m/z: 757.397 cosine: 0.780  $\alpha$ : 0.339

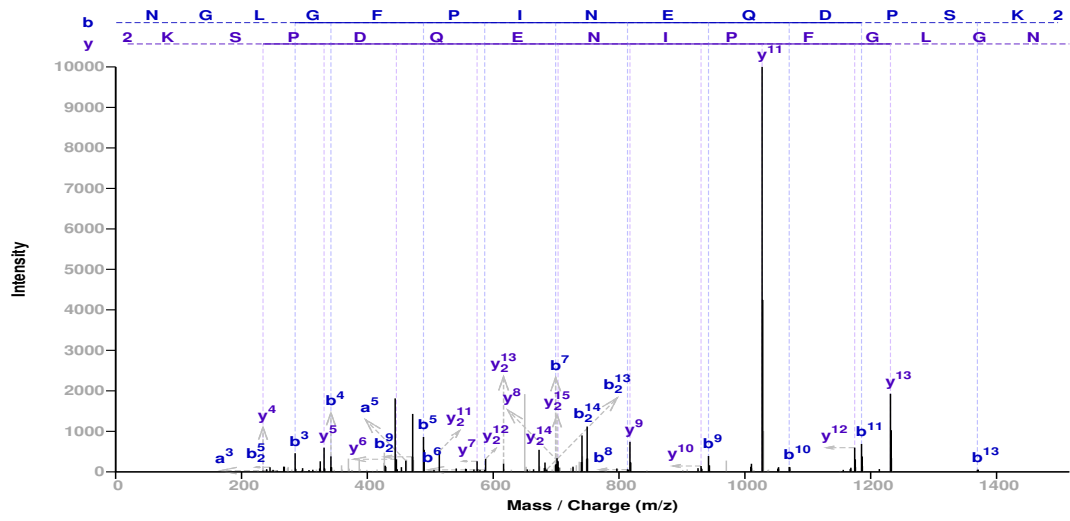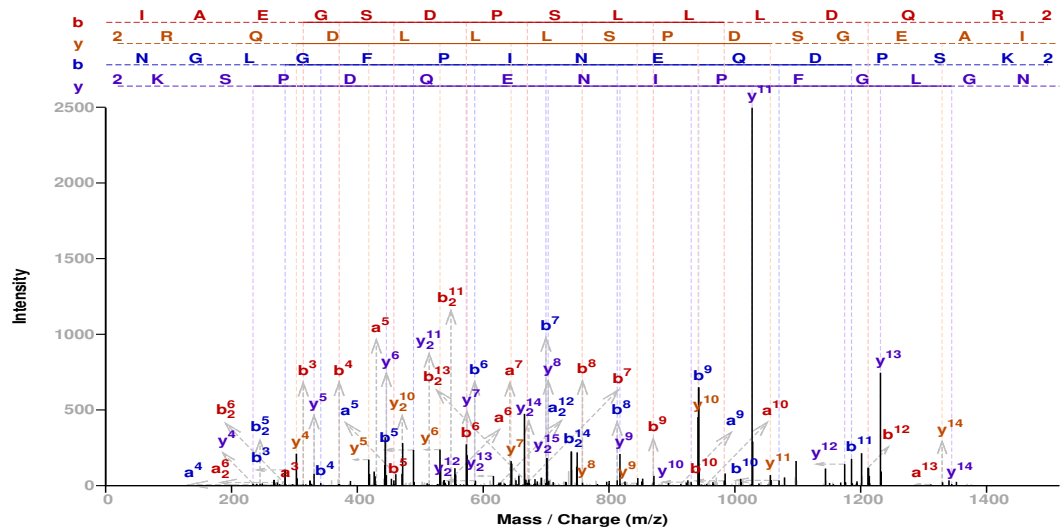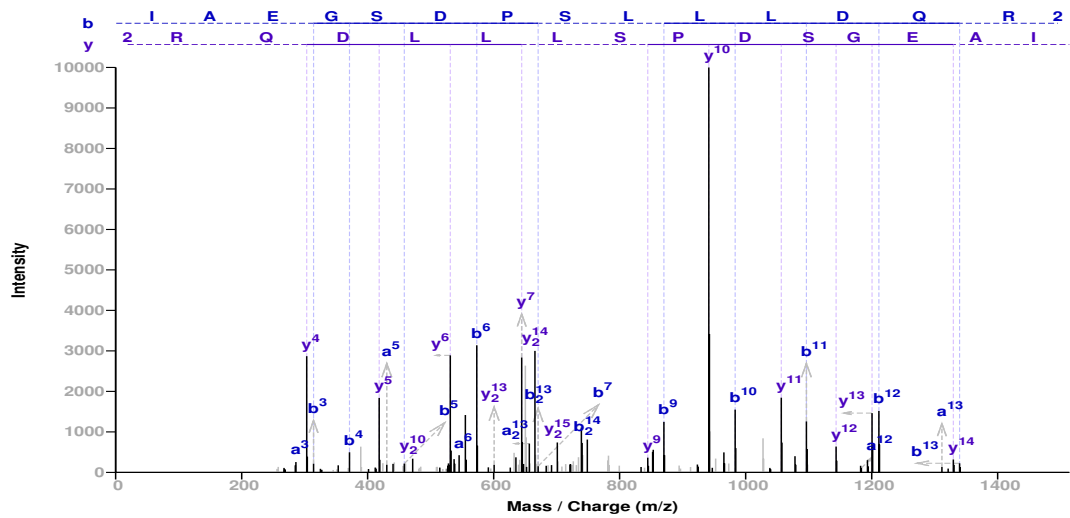

yeast1\_Scan\_Number\_2657 Precursor m/z: 351.535 cosine: 0.796  $\alpha$ : 0.336

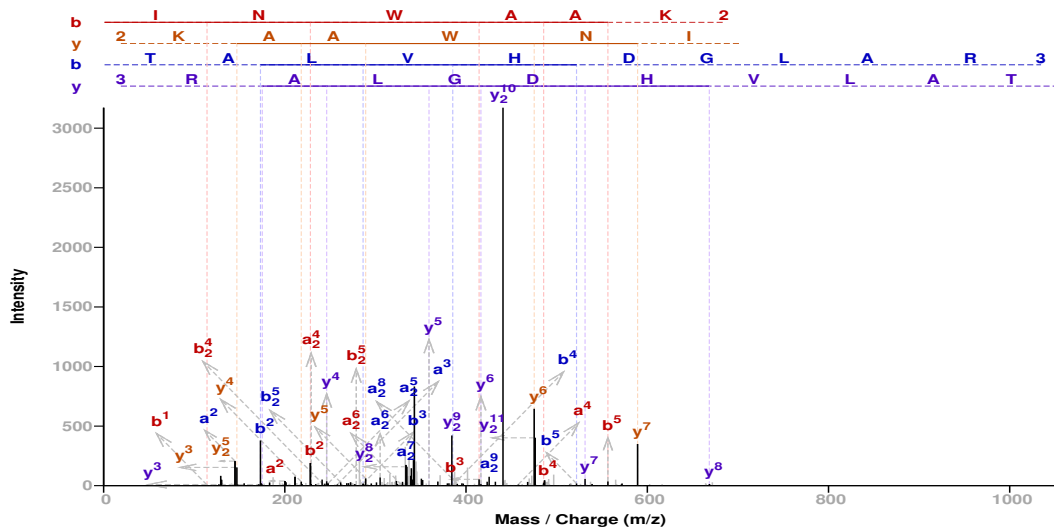

yeast1\_Scan\_Number\_5974 Precursor m/z: 598.818 cosine: 0.791  $\alpha$ : 0.336

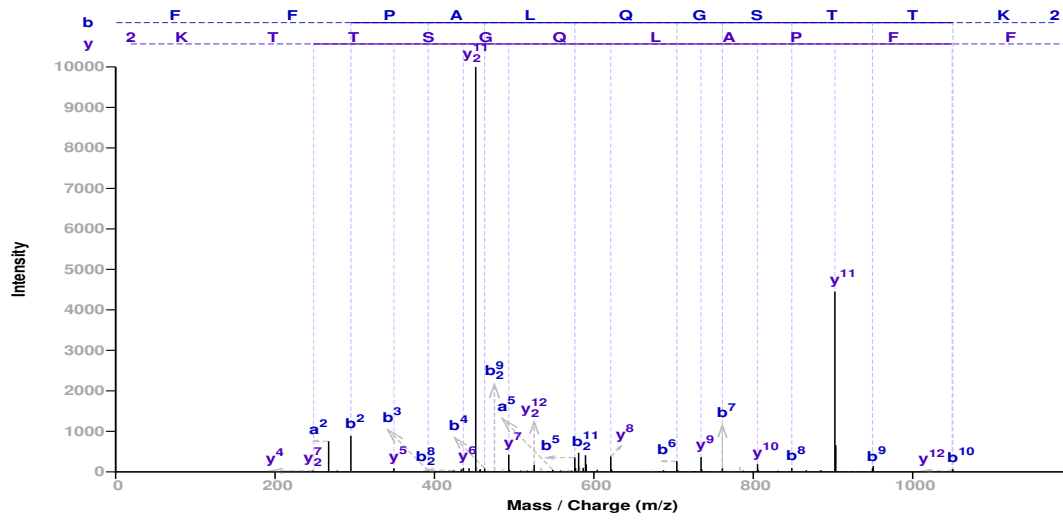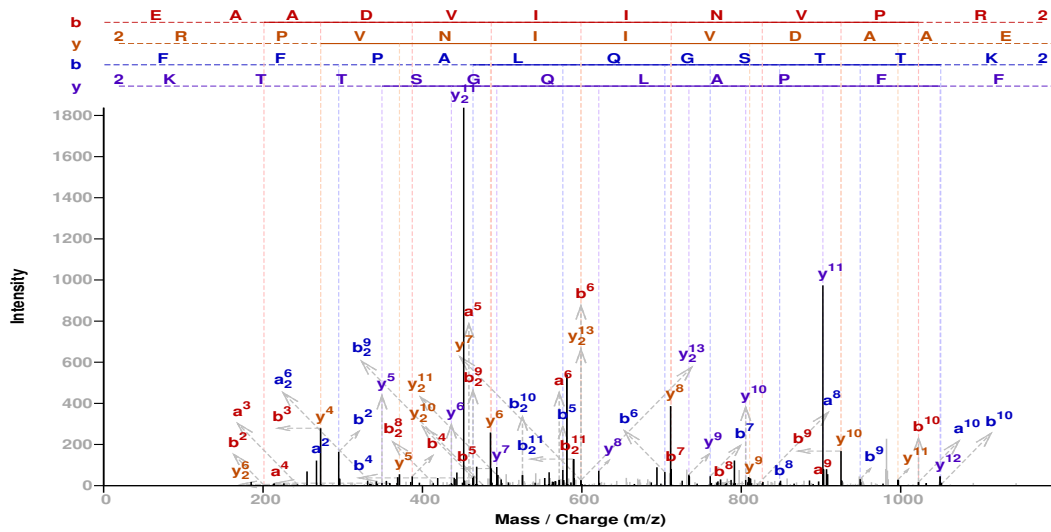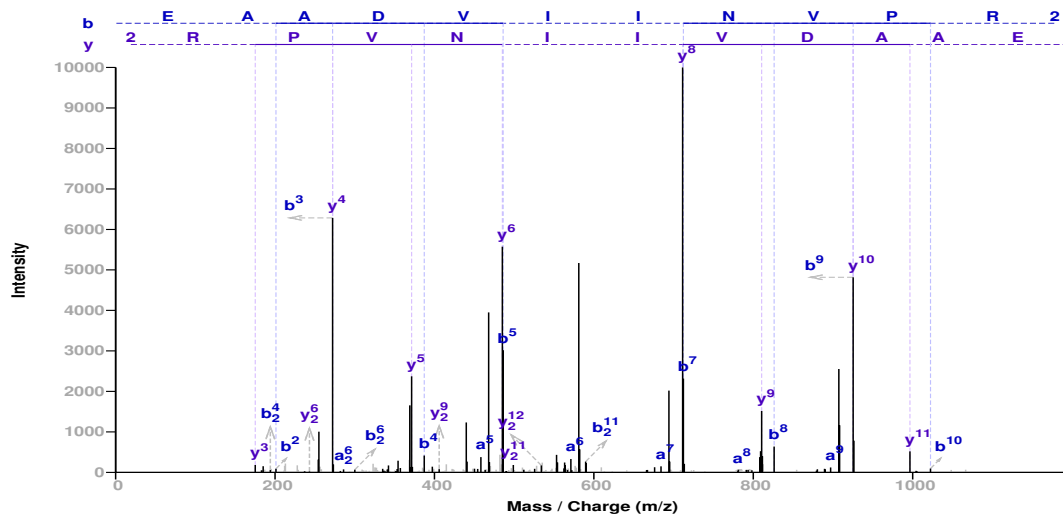



yeast1\_Scan\_Number\_2473 Precursor m/z: 421.250 cosine: 0.759  $\alpha$ : 0.332

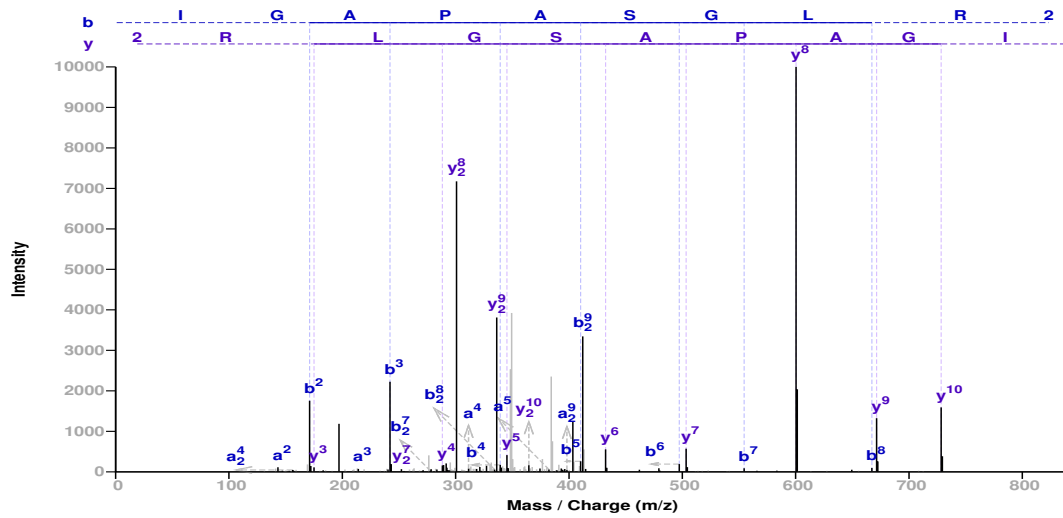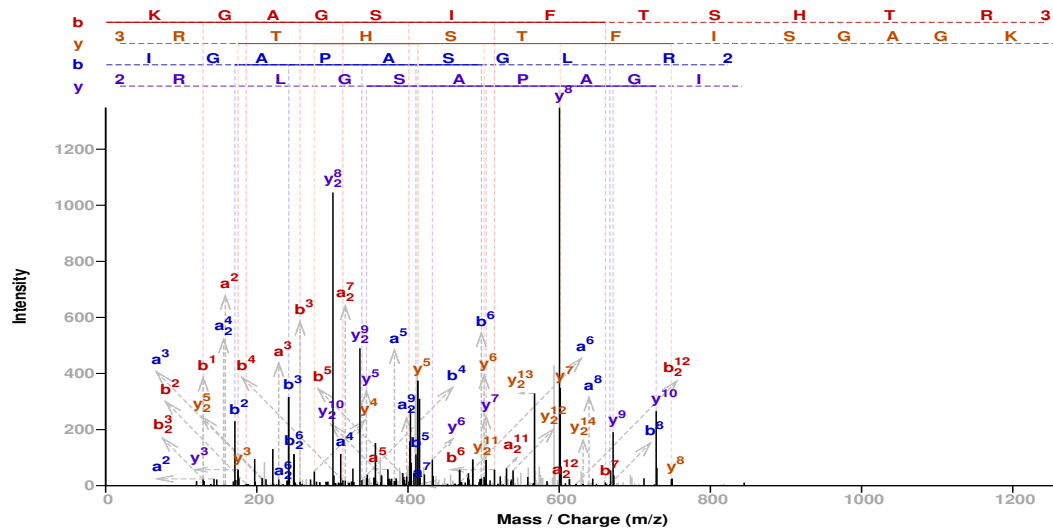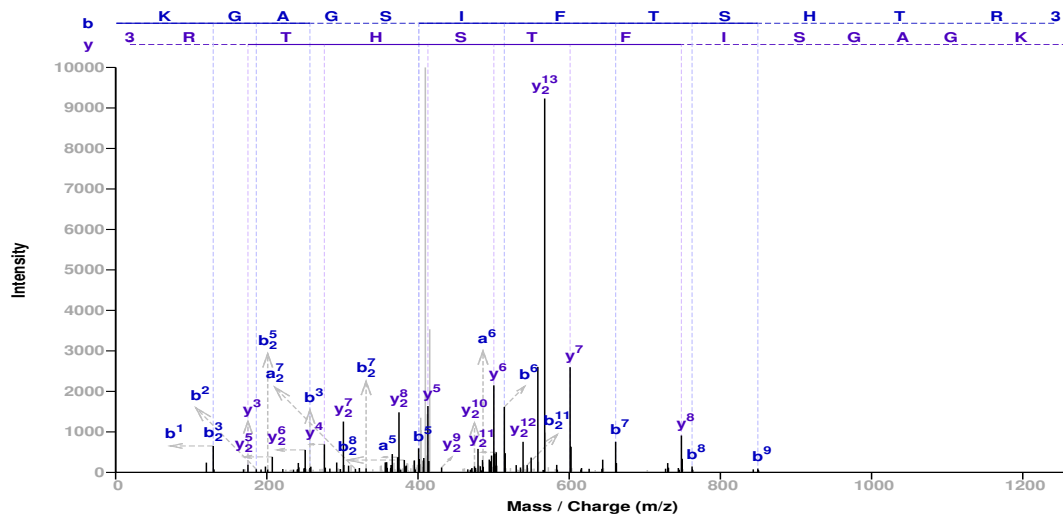

yeast1\_Scan\_Number\_981 Precursor m/z: 469.238 cosine: 0.735  $\alpha$ : 0.331

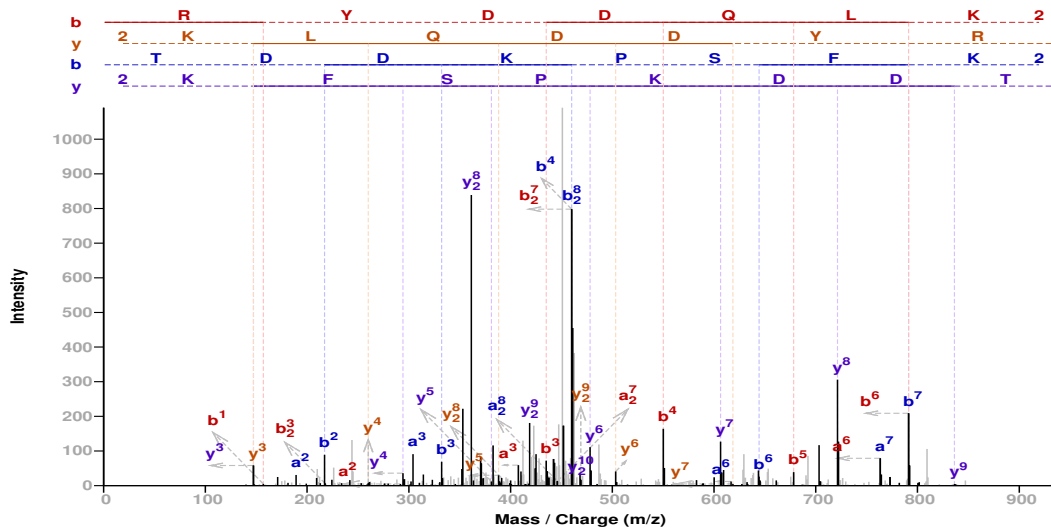

yeast1\_Scan\_Number\_3303 Precursor m/z: 565.736 cosine: 0.799  $\alpha$ : 0.328

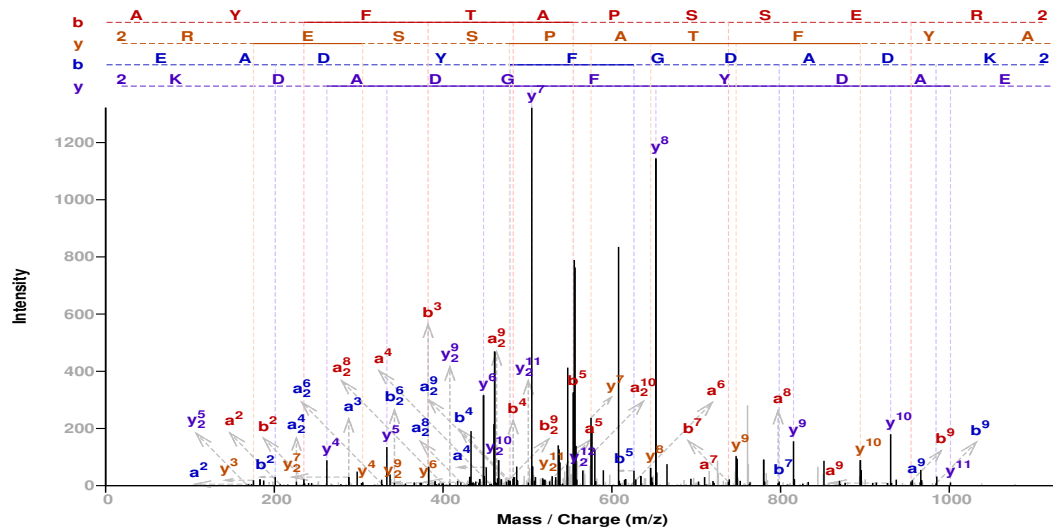

yeast1\_Scan\_Number\_3793 Precursor m/z: 354.883 cosine: 0.786  $\alpha$ : 0.323

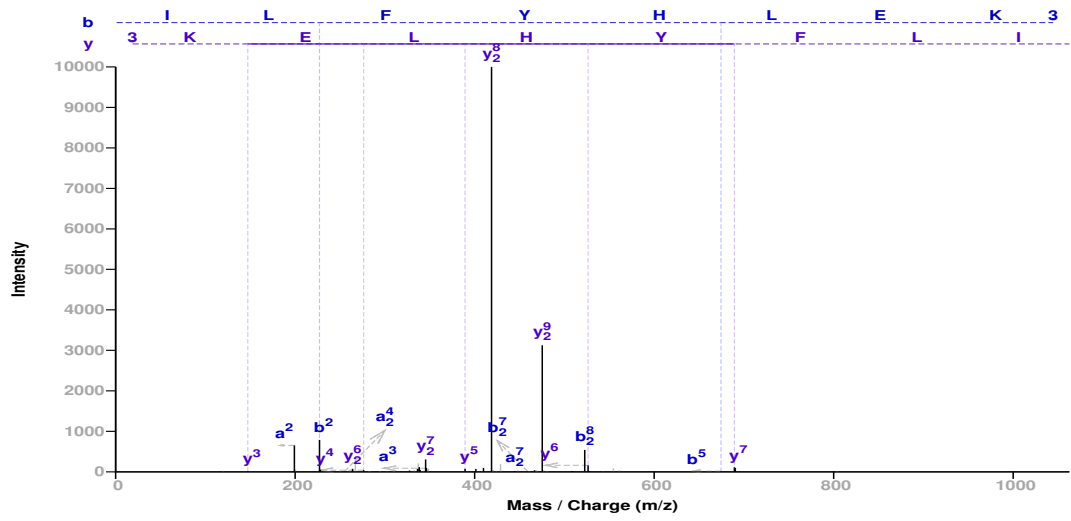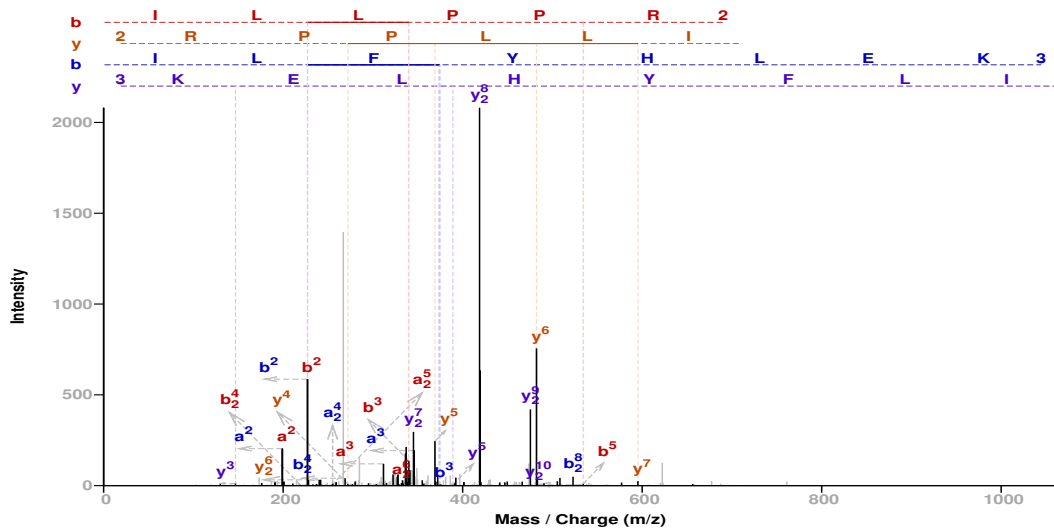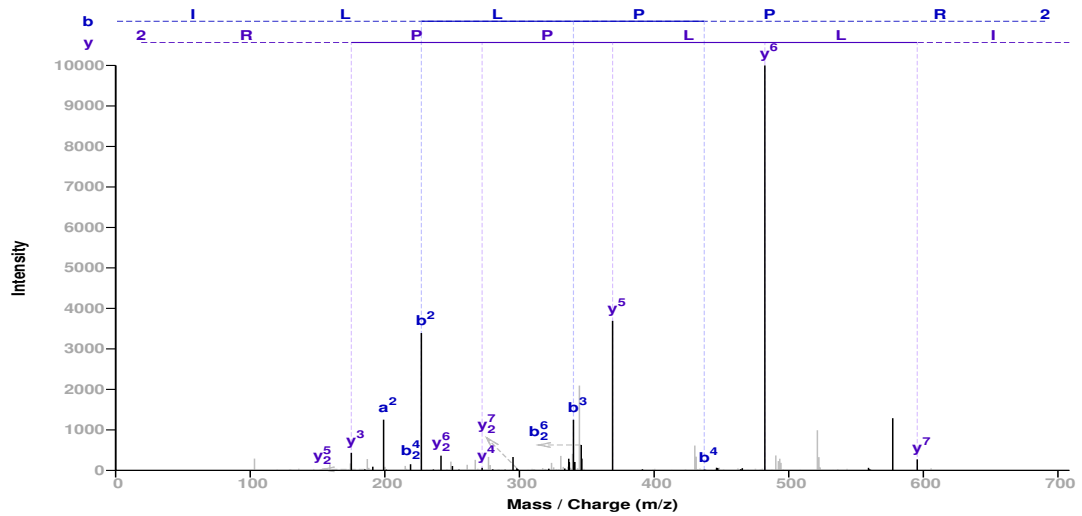

yeast1\_Scan\_Number\_2091 Precursor m/z: 368.705 cosine: 0.757  $\alpha$ : 0.315

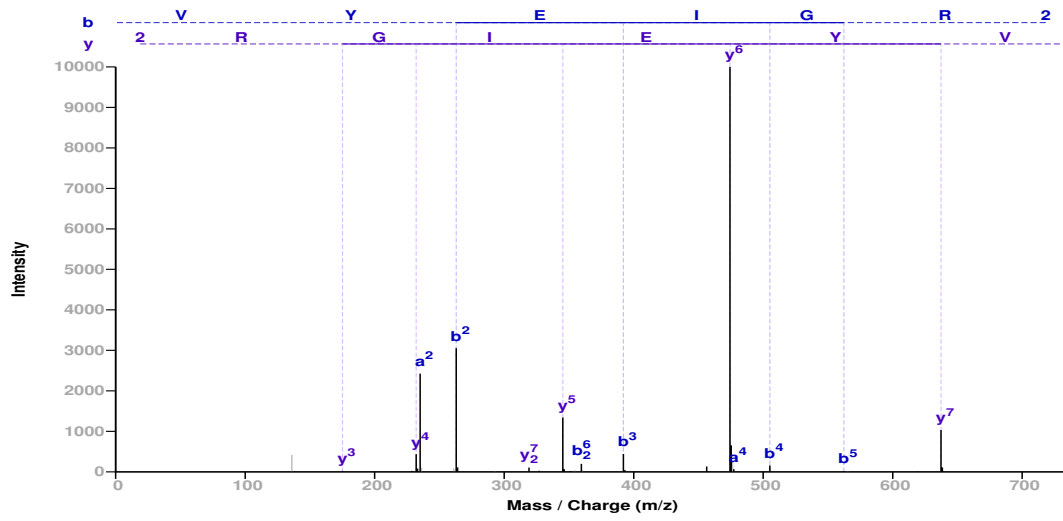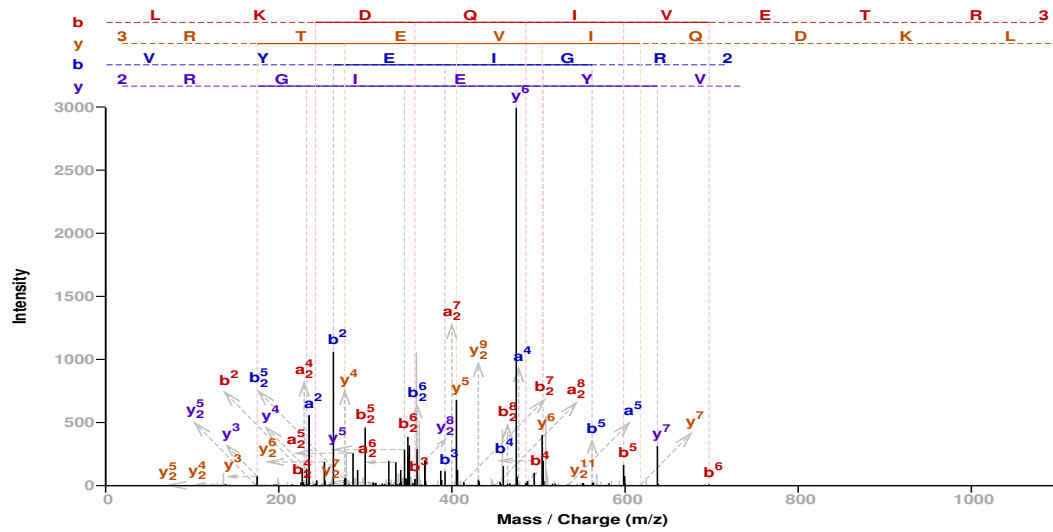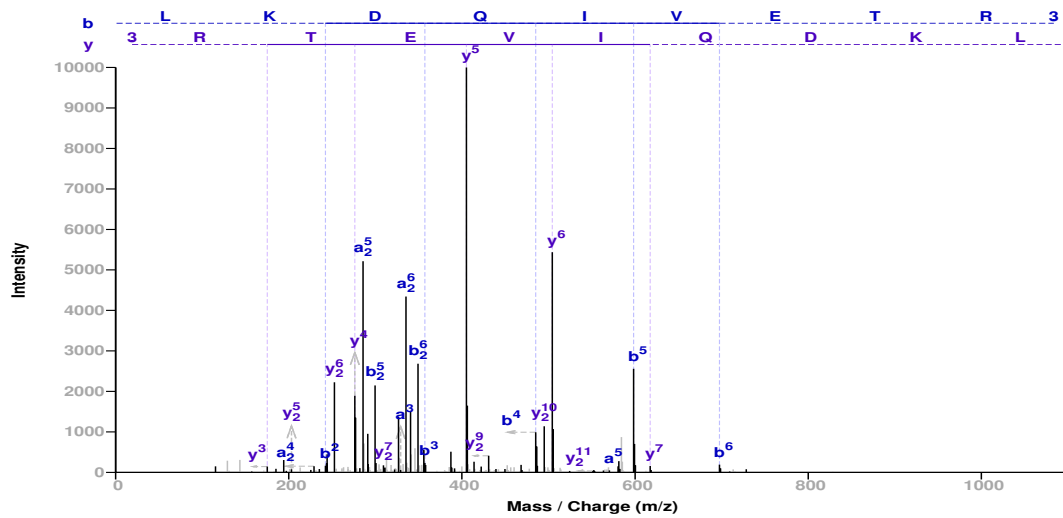

yeast1\_Scan\_Number\_8322 Precursor m/z: 466.774 cosine: 0.749  $\alpha$ : 0.315

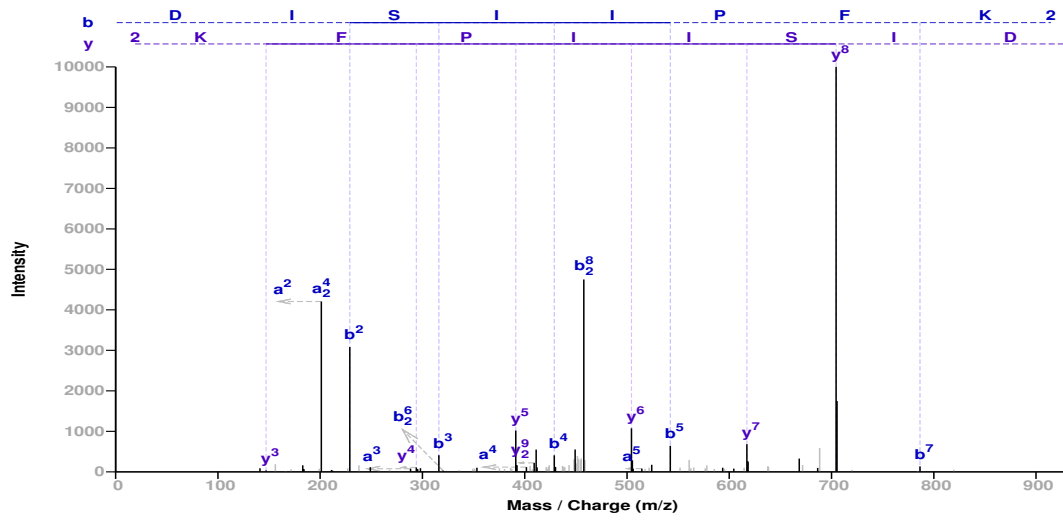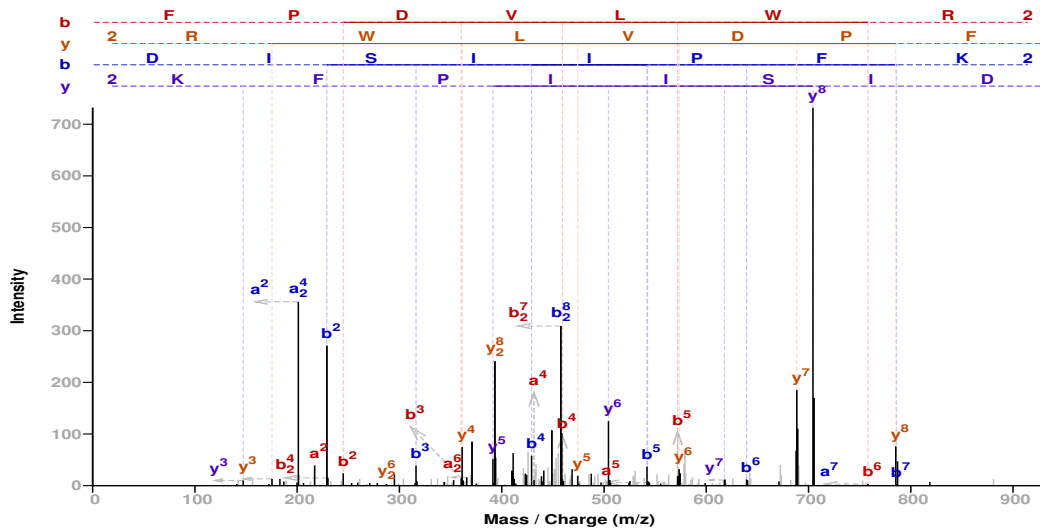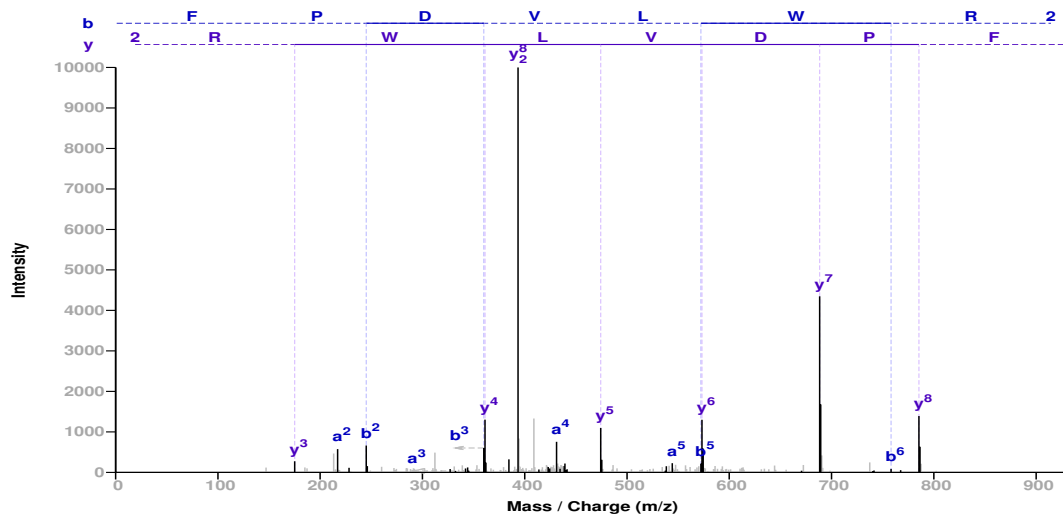

yeast1\_Scan\_Number\_494 Precursor m/z: 442.745 cosine: 0.924  $\alpha$ : 0.310

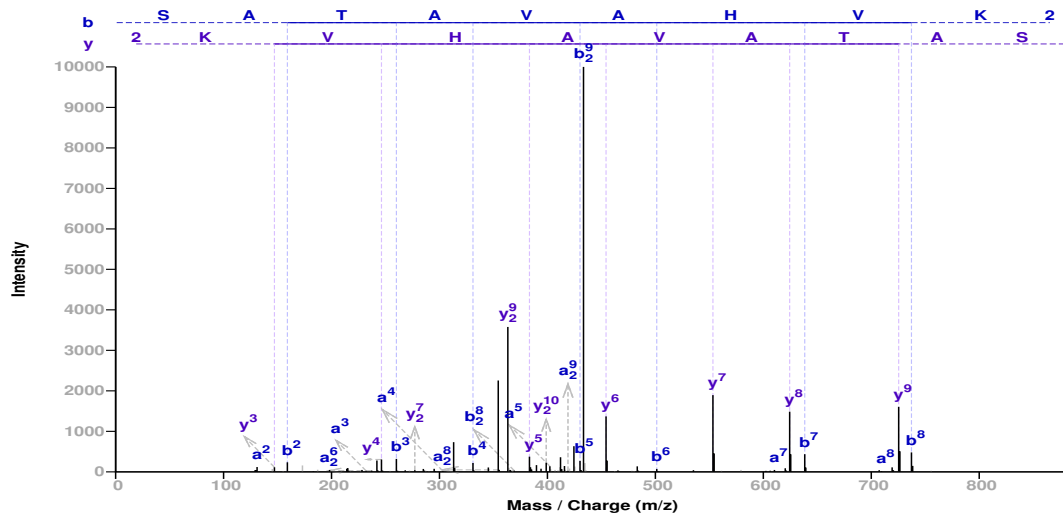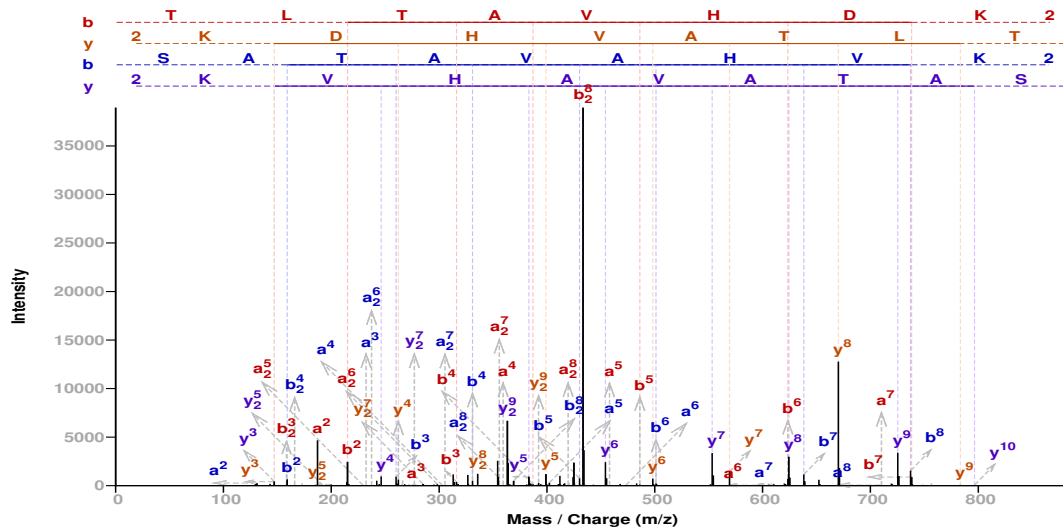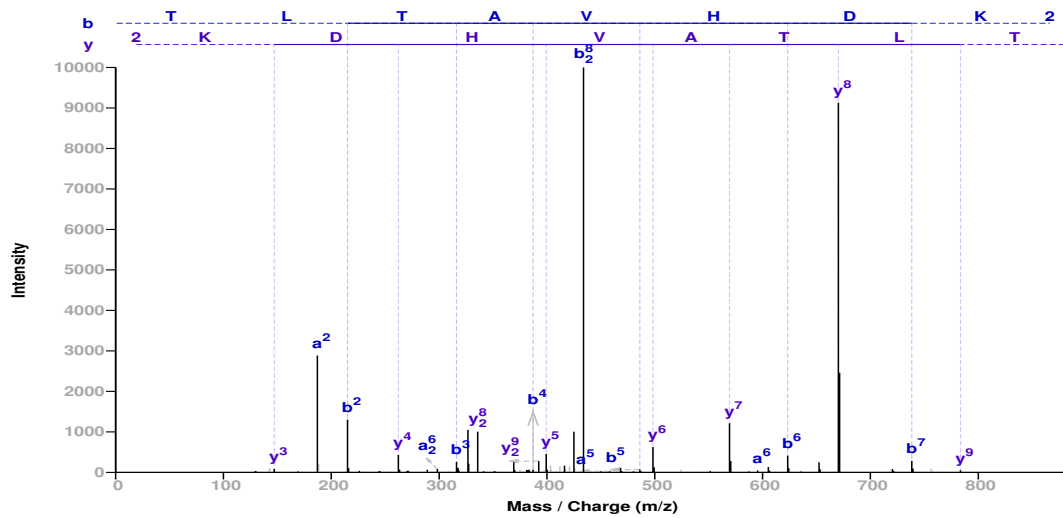







yeast1\_Scan\_Number\_5818 Precursor m/z: 659.362 cosine: 0.773  $\alpha$ : 0.308

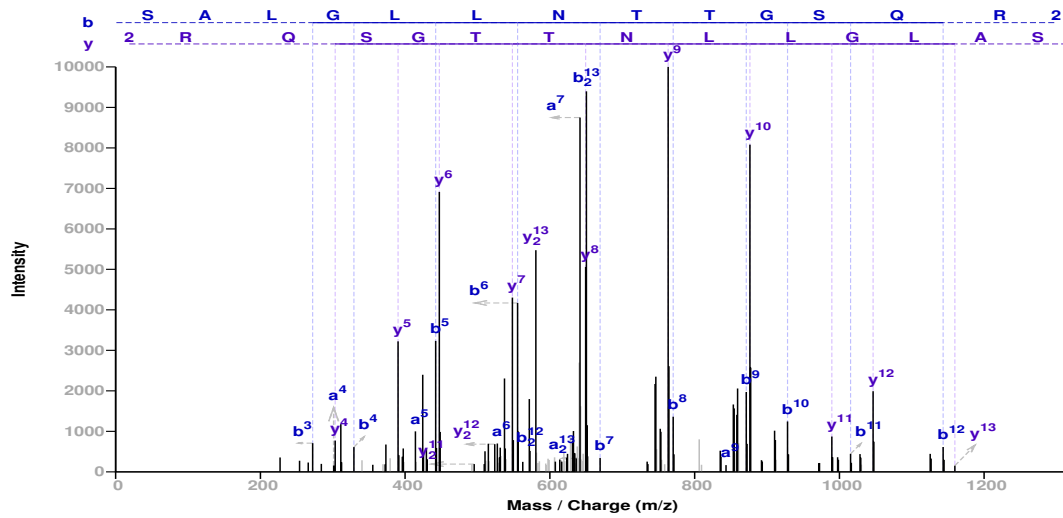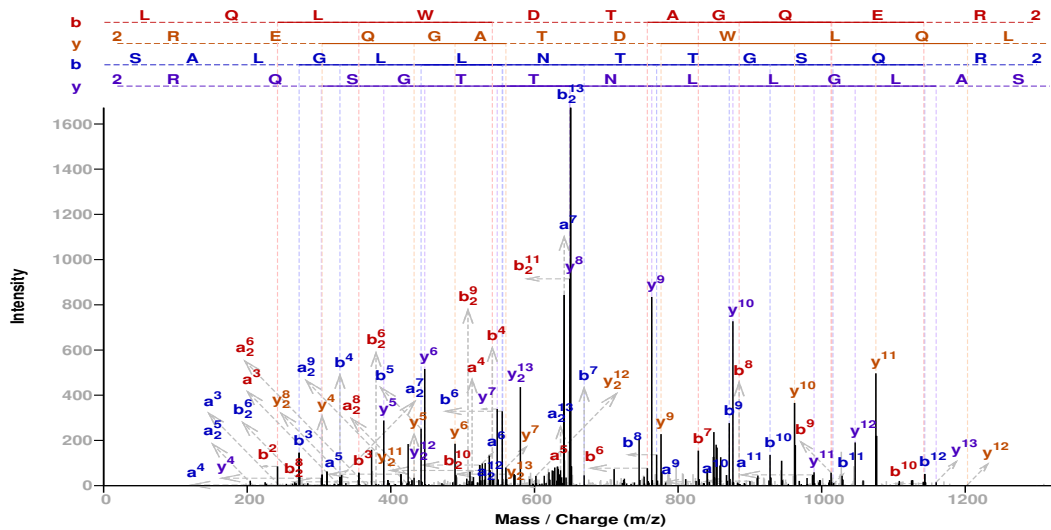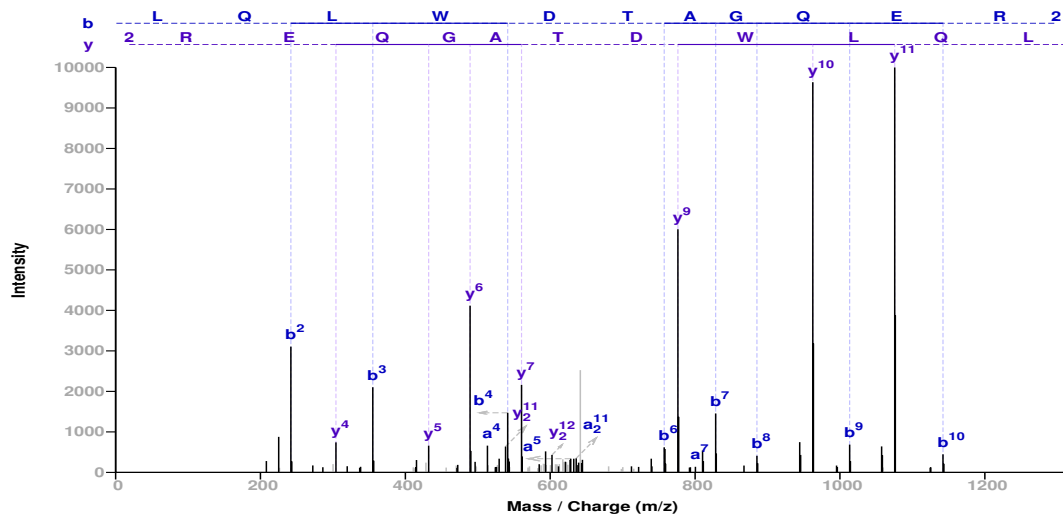

yeast1\_Scan\_Number\_2834 Precursor m/z: 630.818 cosine: 0.815  $\alpha$ : 0.304

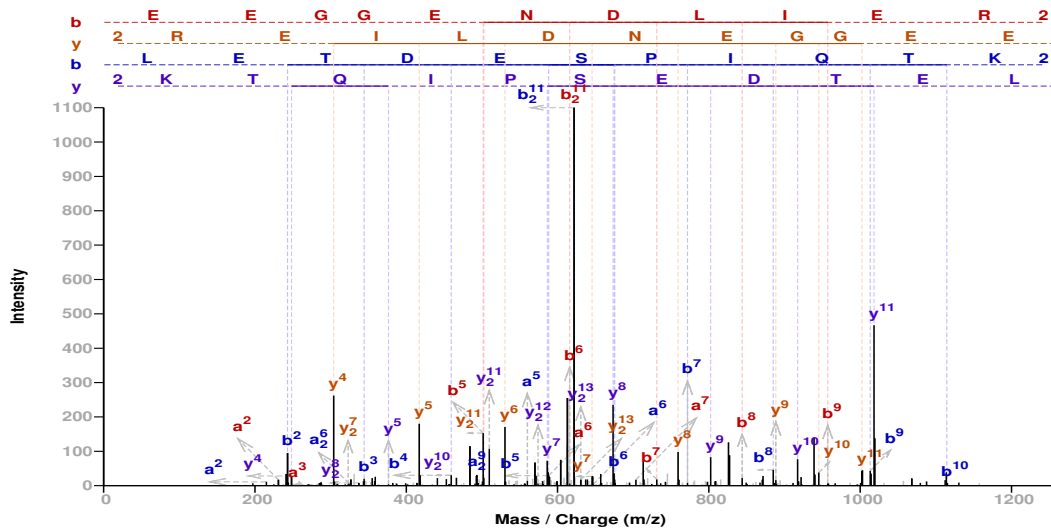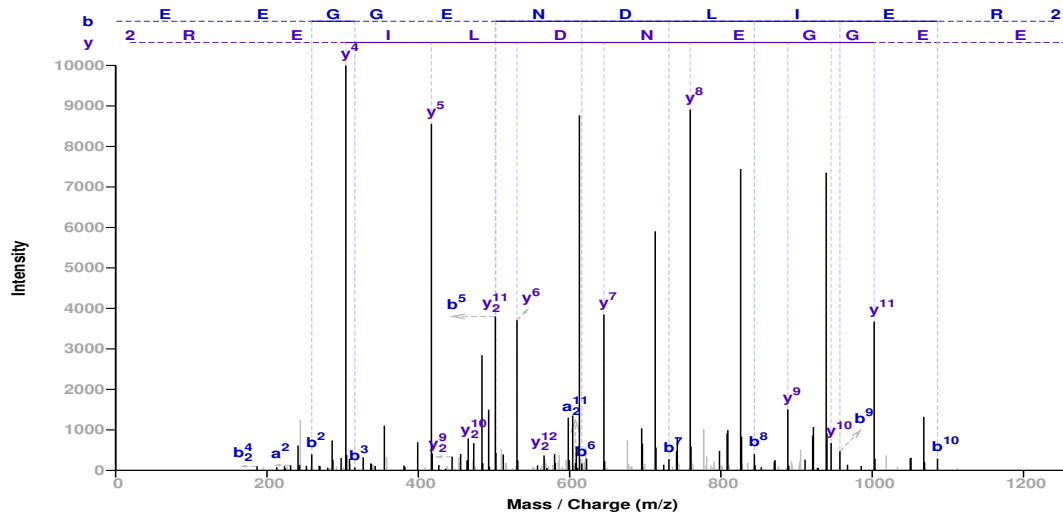

yeast1\_Scan\_Number\_5212 Precursor m/z: 612.000 cosine: 0.823  $\alpha$ : 0.303

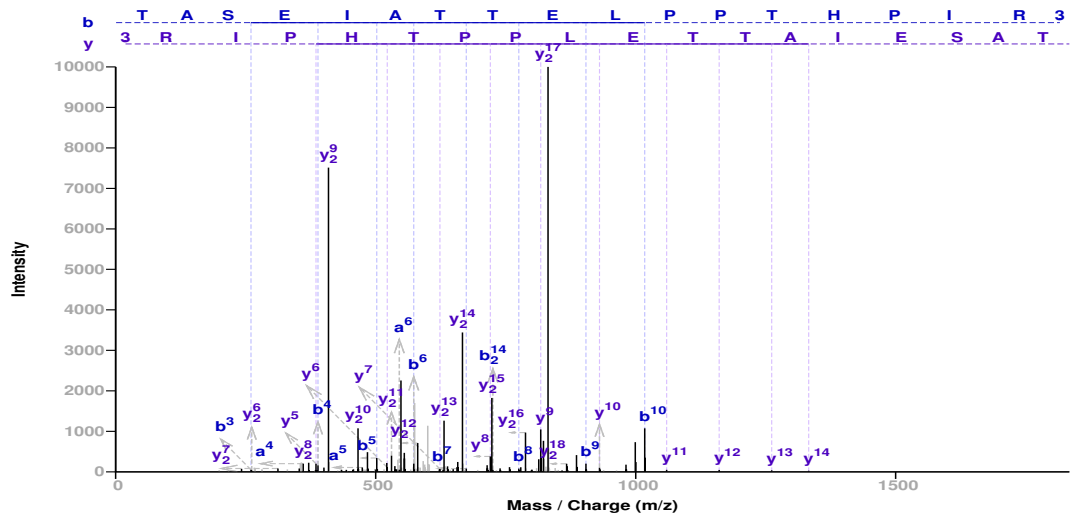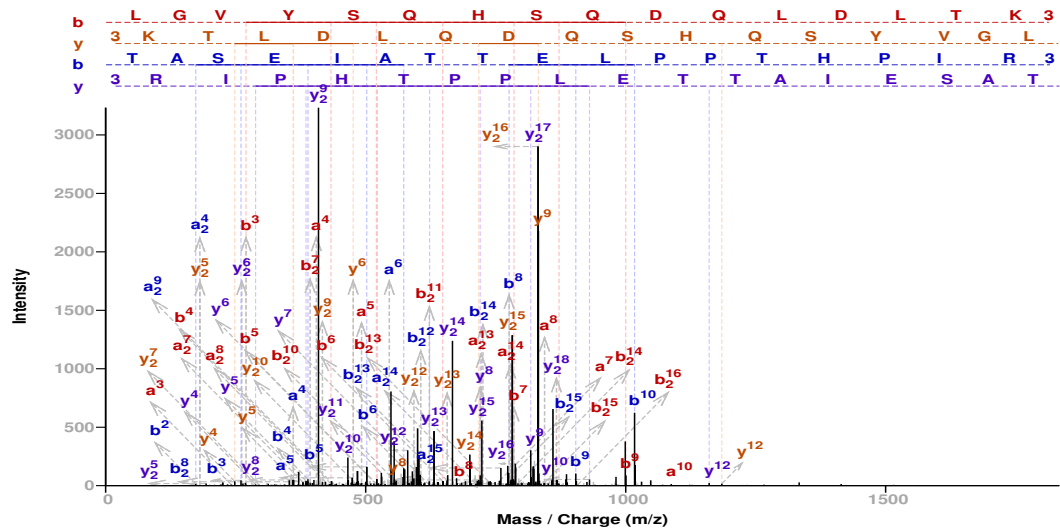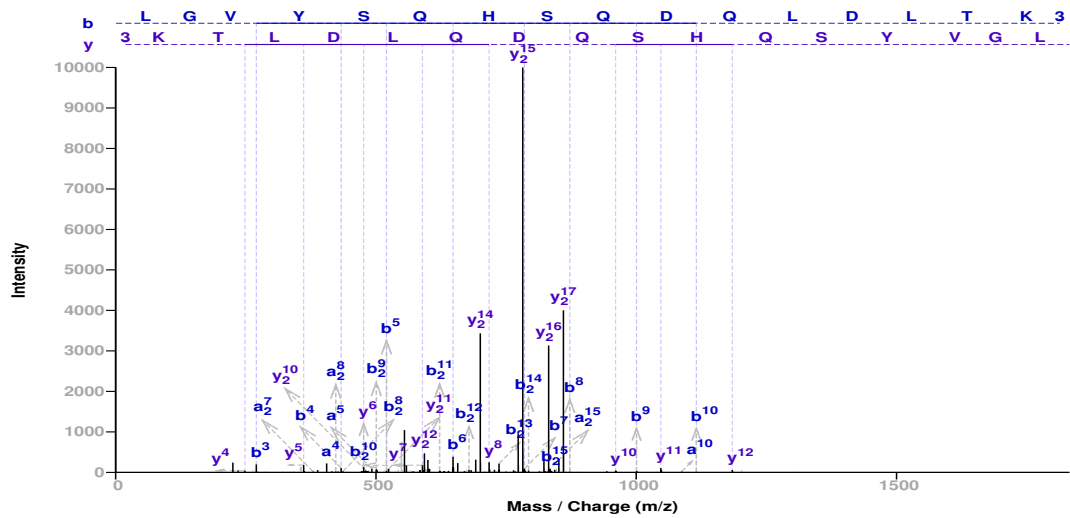

yeast1\_Scan\_Number\_1982 Precursor m/z: 424.250 cosine: 0.875  $\alpha$ : 0.299

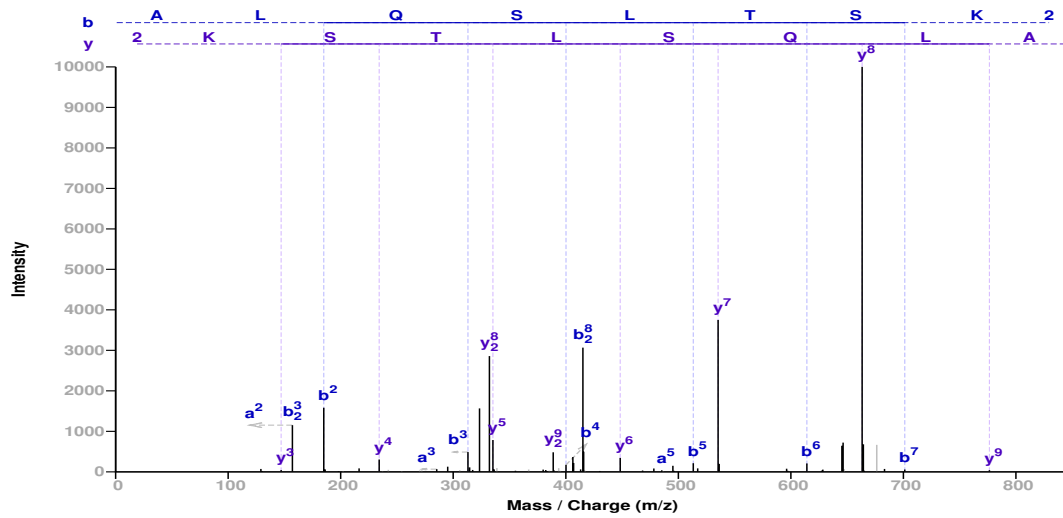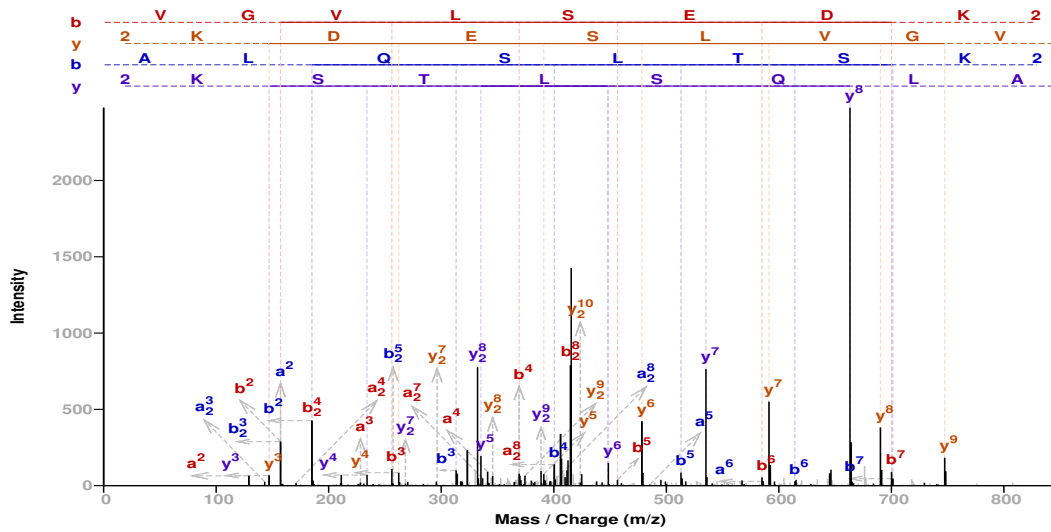

yeast1\_Scan\_Number\_5355 Precursor m/z: 471.242 cosine: 0.880  $\alpha$ : 0.290

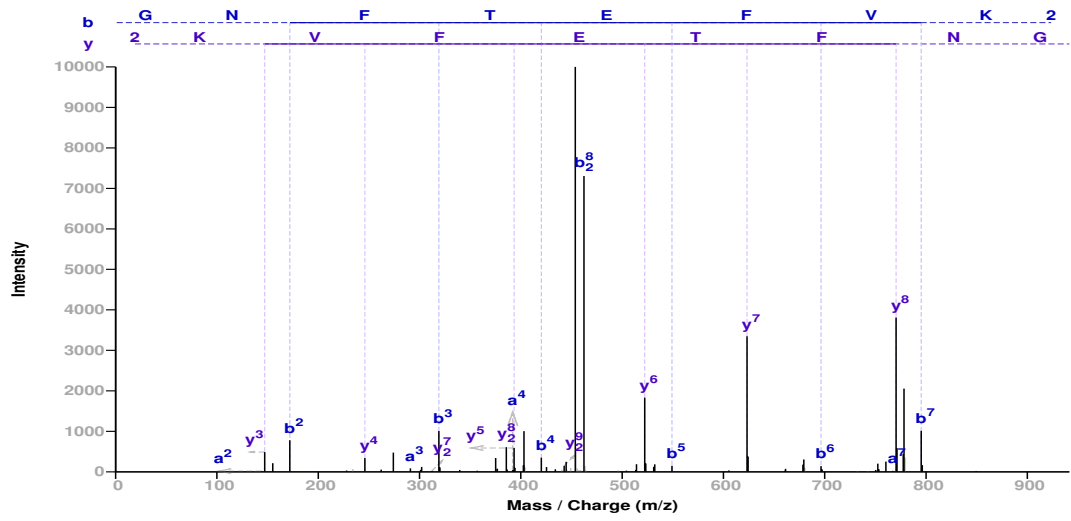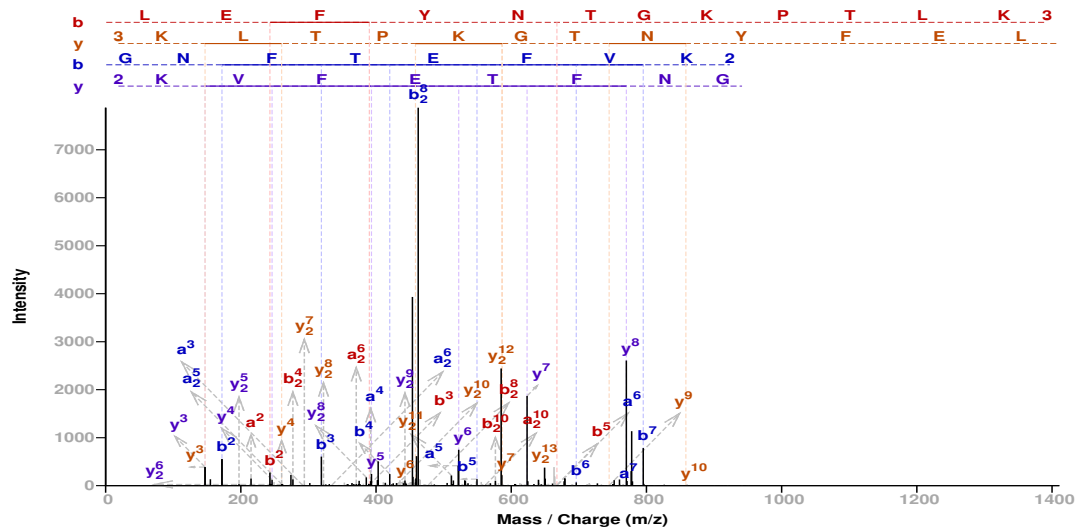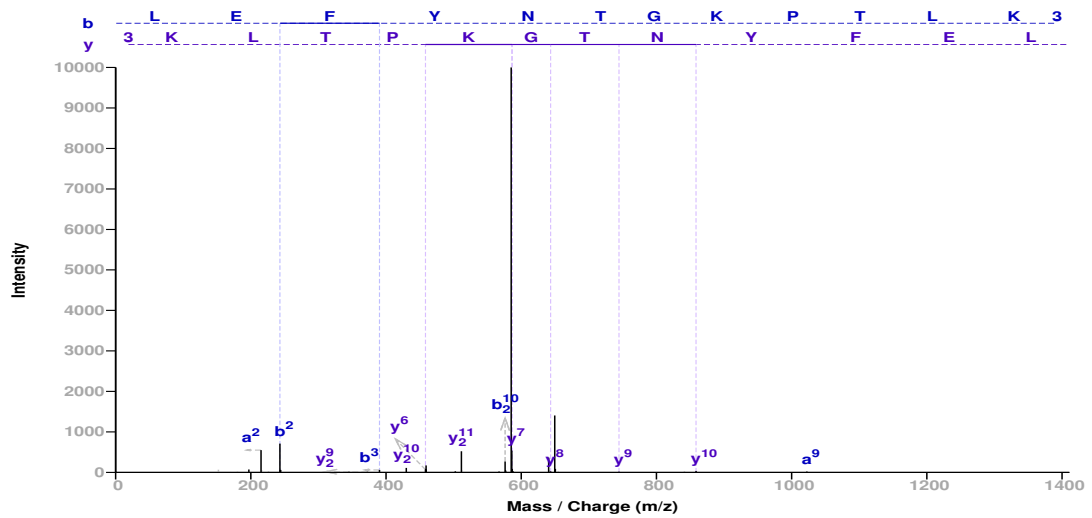

yeast1\_Scan\_Number\_6235 Precursor m/z: 574.323 cosine: 0.841  $\alpha$ : 0.288

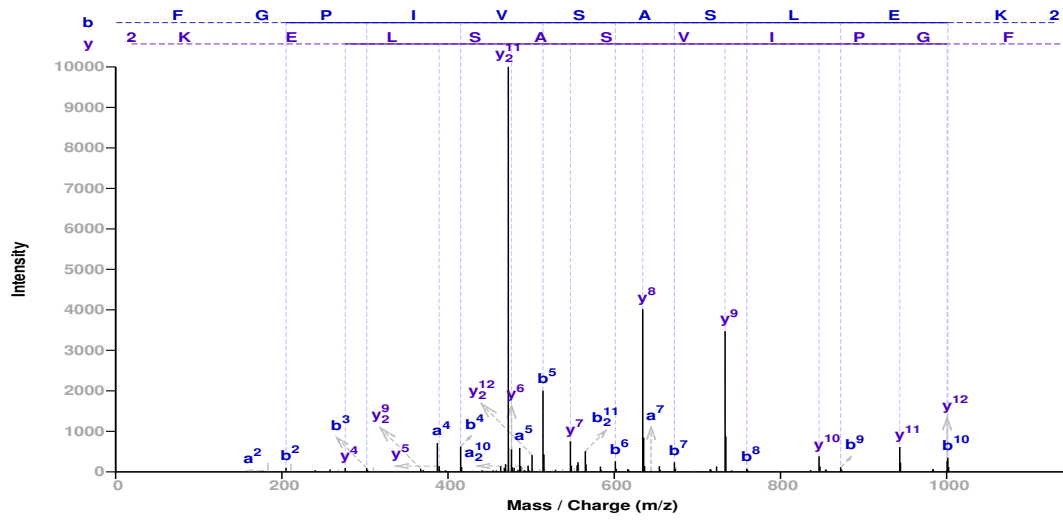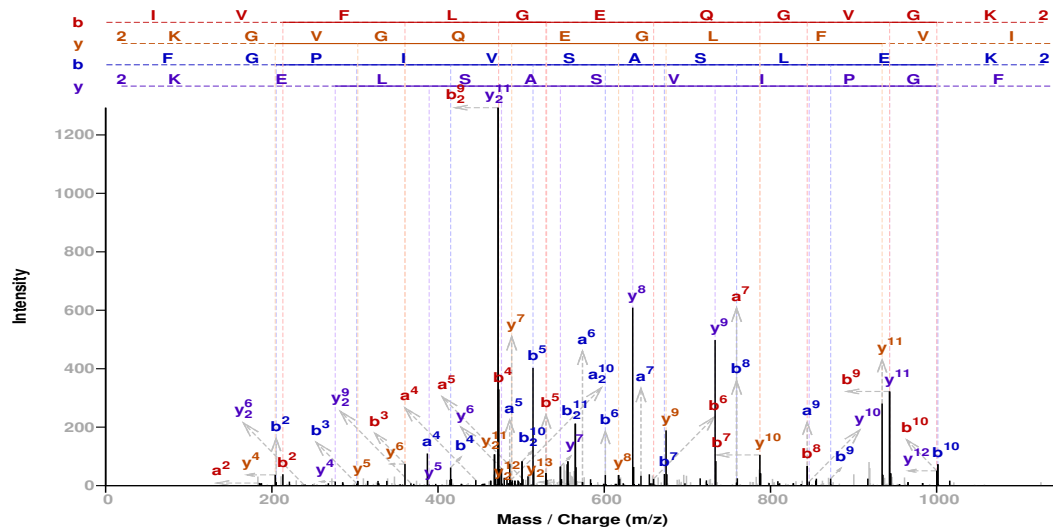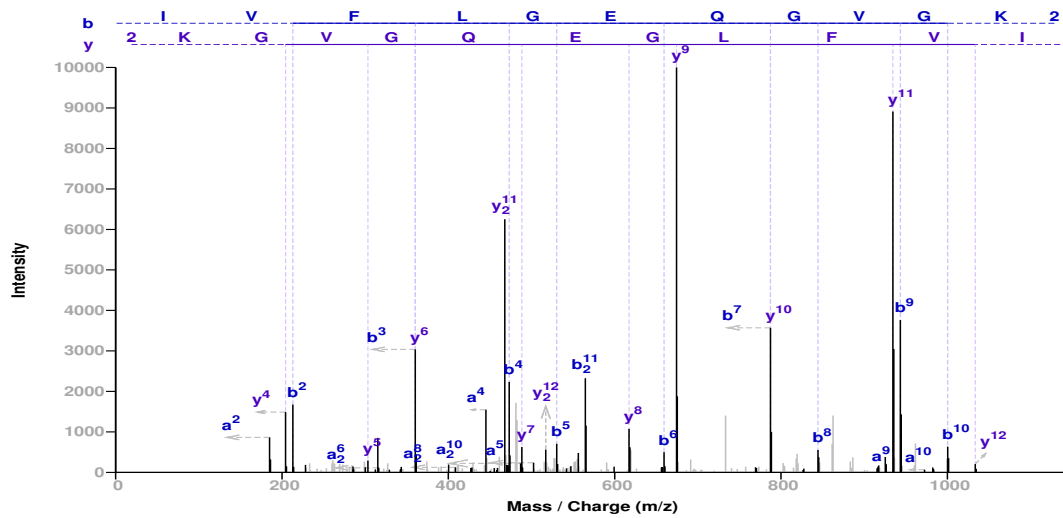

yeast1\_Scan\_Number\_6014 Precursor m/z: 813.366 cosine: 0.776  $\alpha$ : 0.287

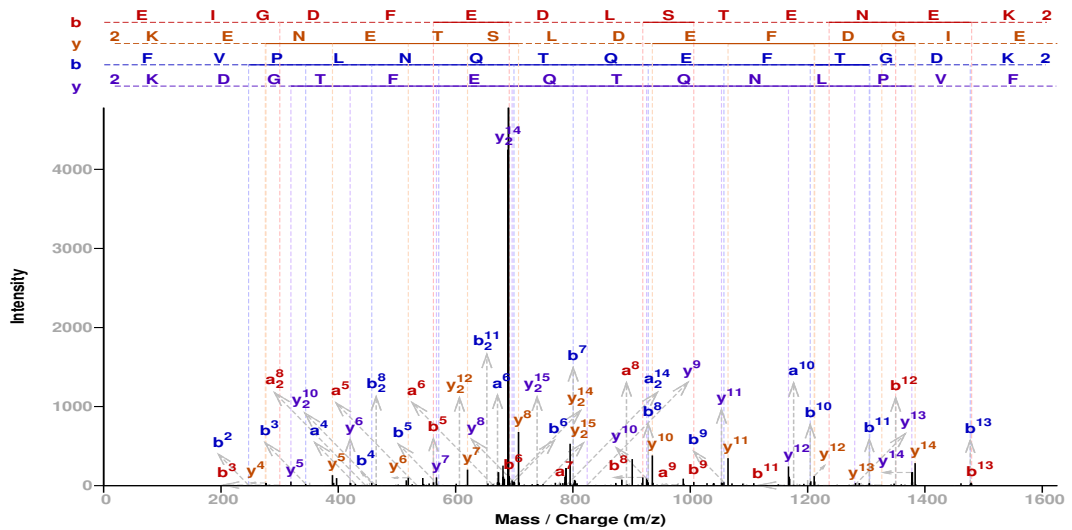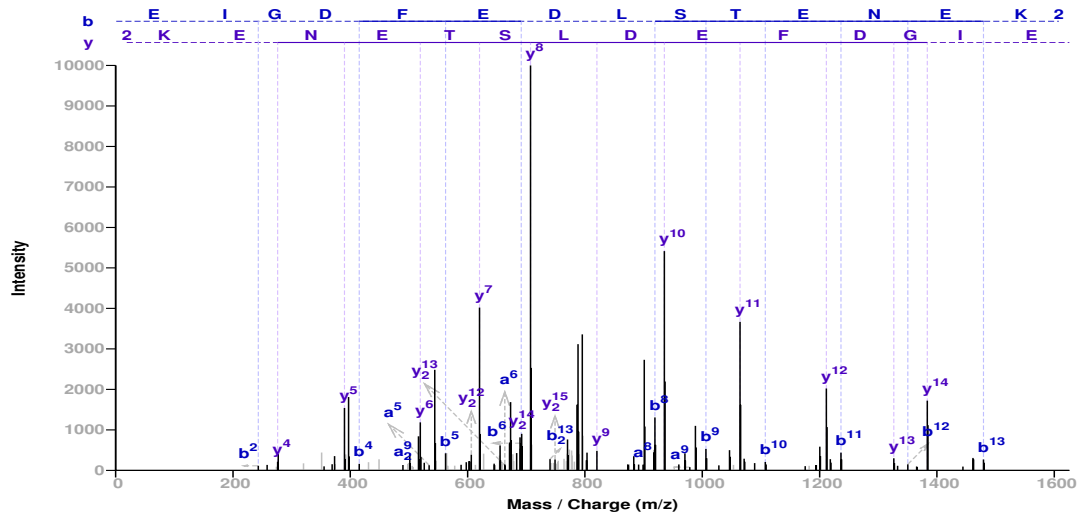



yeast1\_Scan\_Number\_3749 Precursor m/z: 600.843 cosine: 0.764  $\alpha$ : 0.285

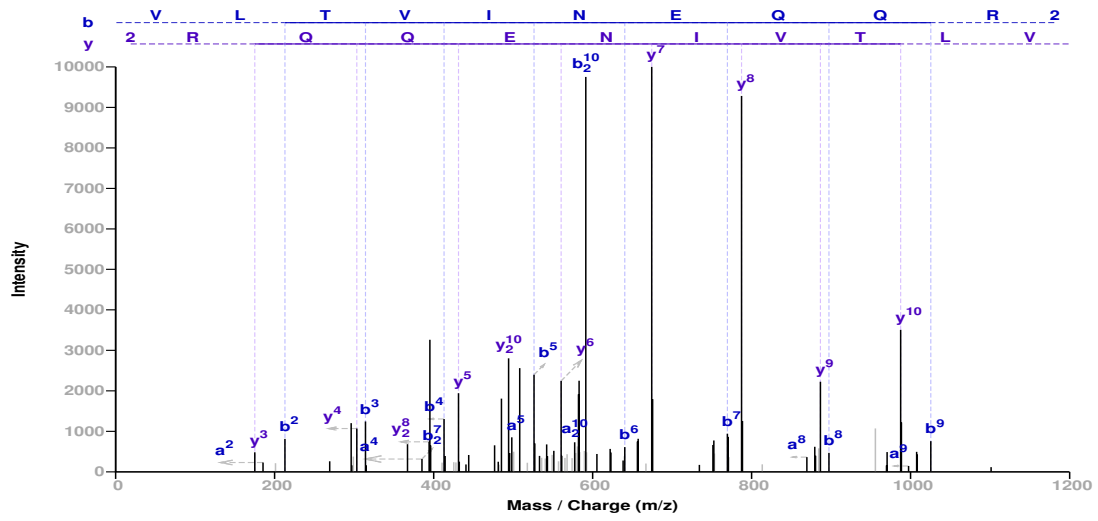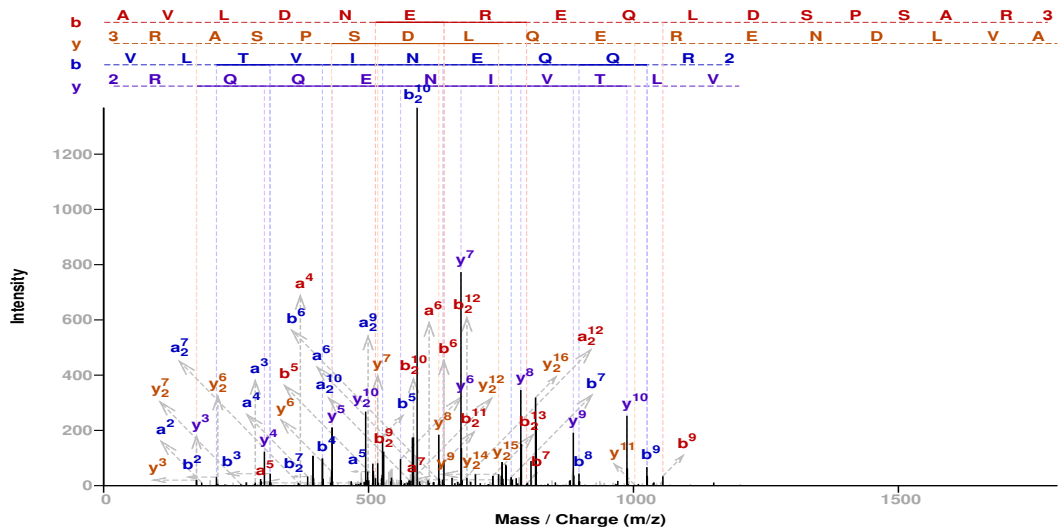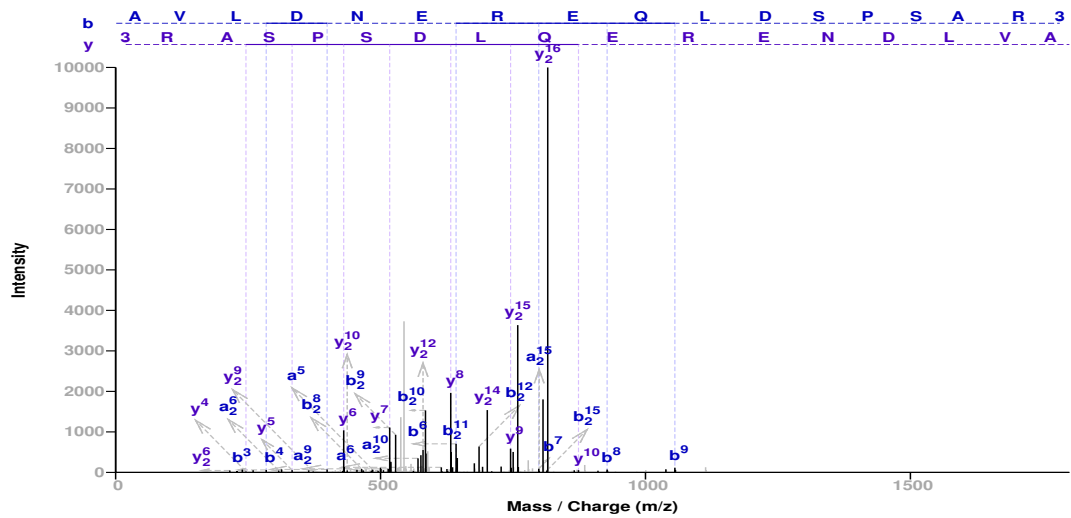

yeast1\_Scan\_Number\_4365 Precursor m/z: 404.235 cosine: 0.777  $\alpha$ : 0.285

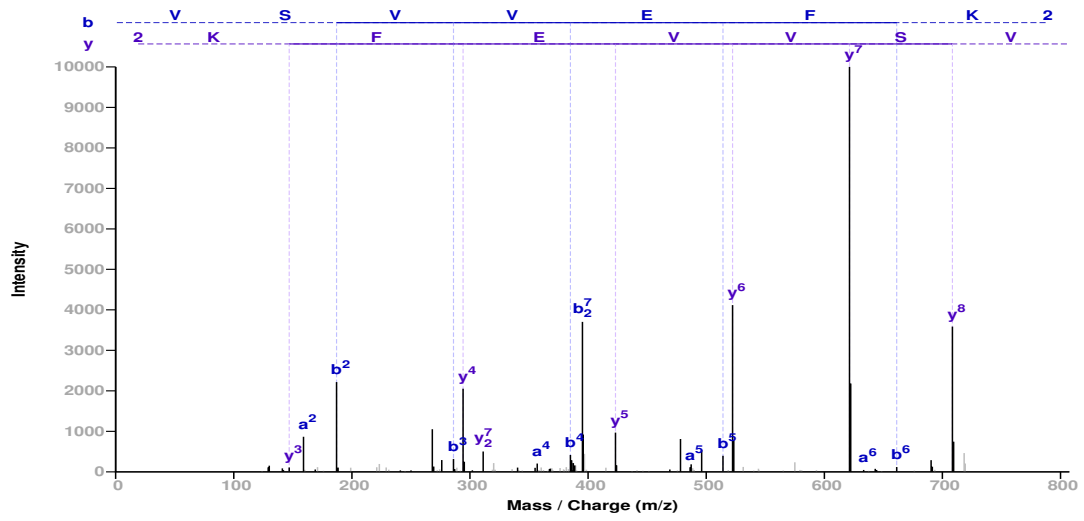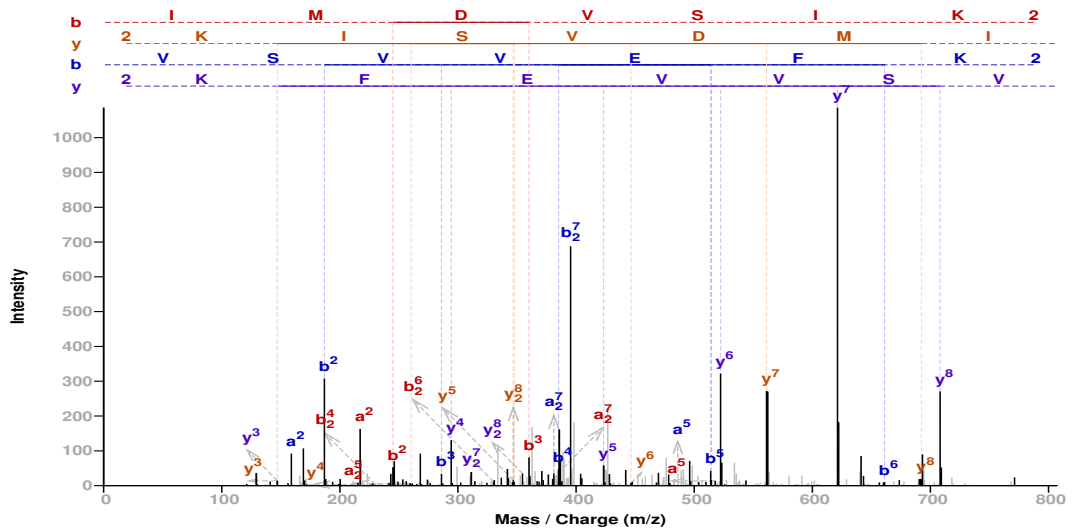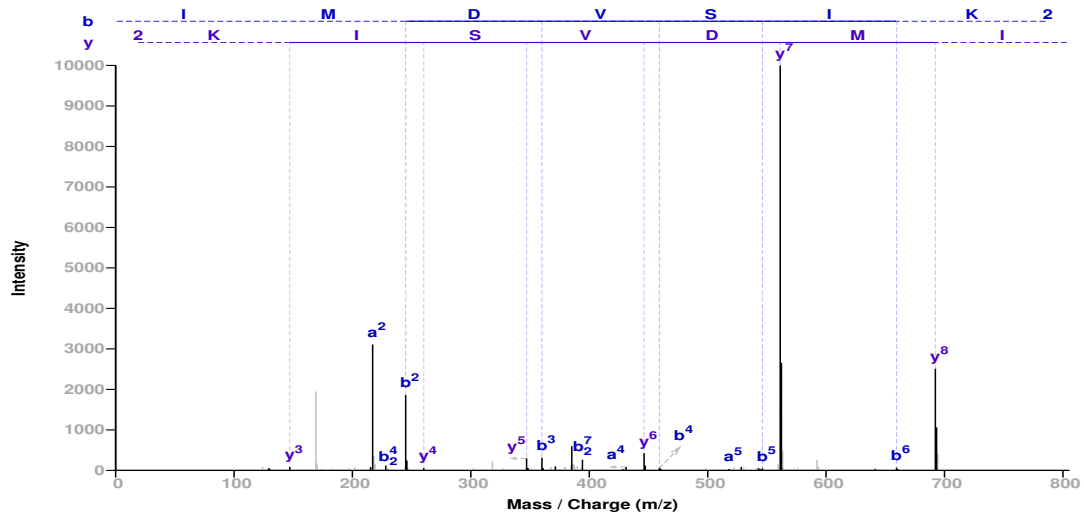

yeast1\_Scan\_Number\_622 Precursor m/z: 425.228 cosine: 0.828  $\alpha$ : 0.285

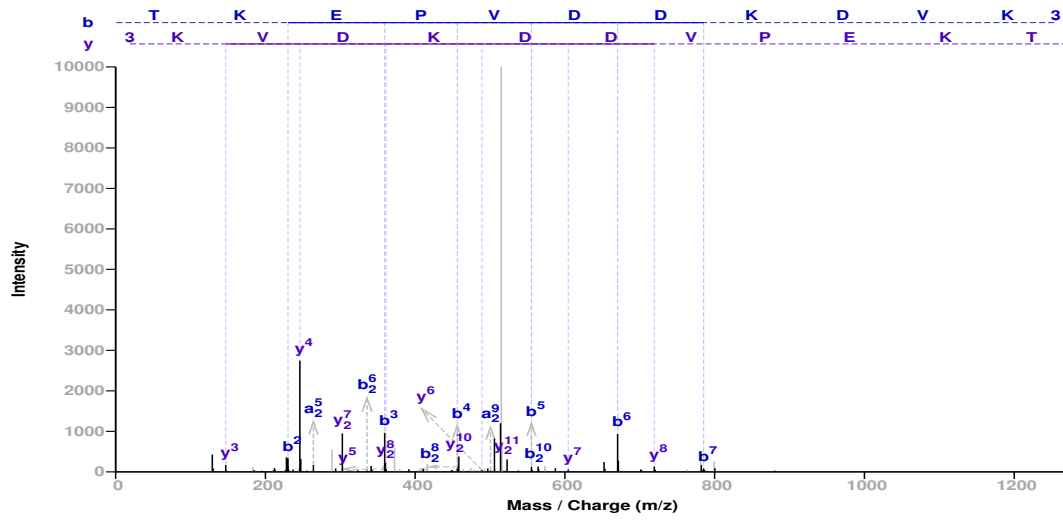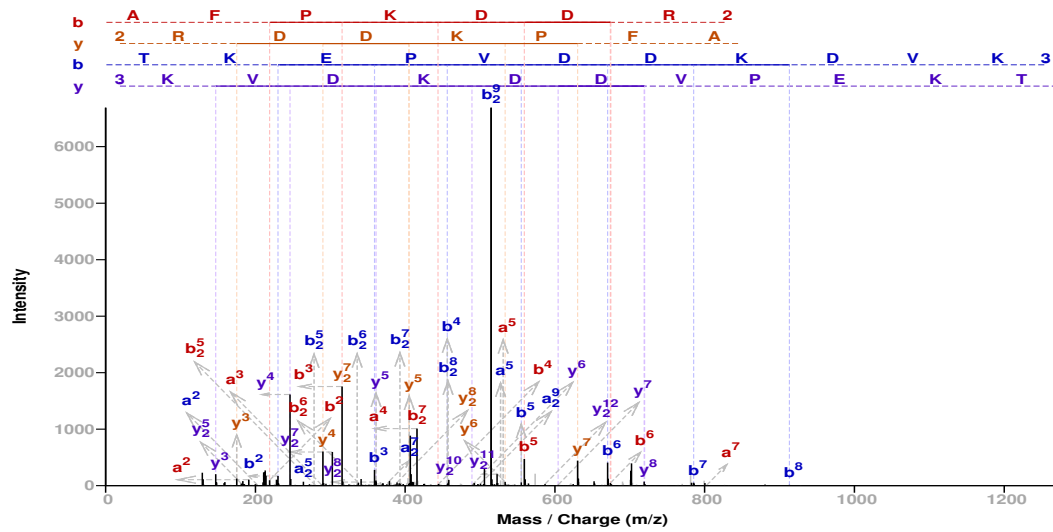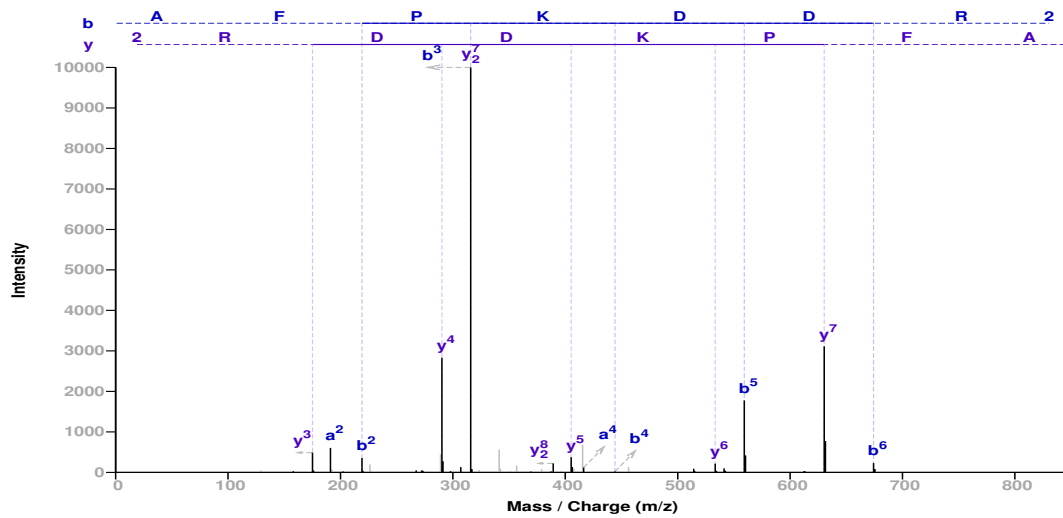

yeast1\_Scan\_Number\_2441 Precursor m/z: 396.718 cosine: 0.886  $\alpha$ : 0.283

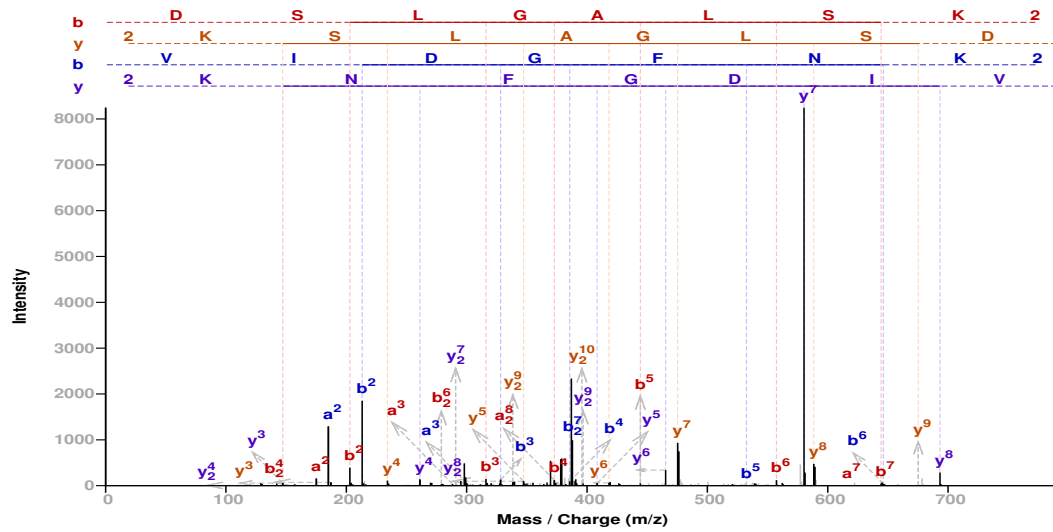

yeast1\_Scan\_Number\_1843 Precursor m/z: 354.209 cosine: 0.758  $\alpha$ : 0.282

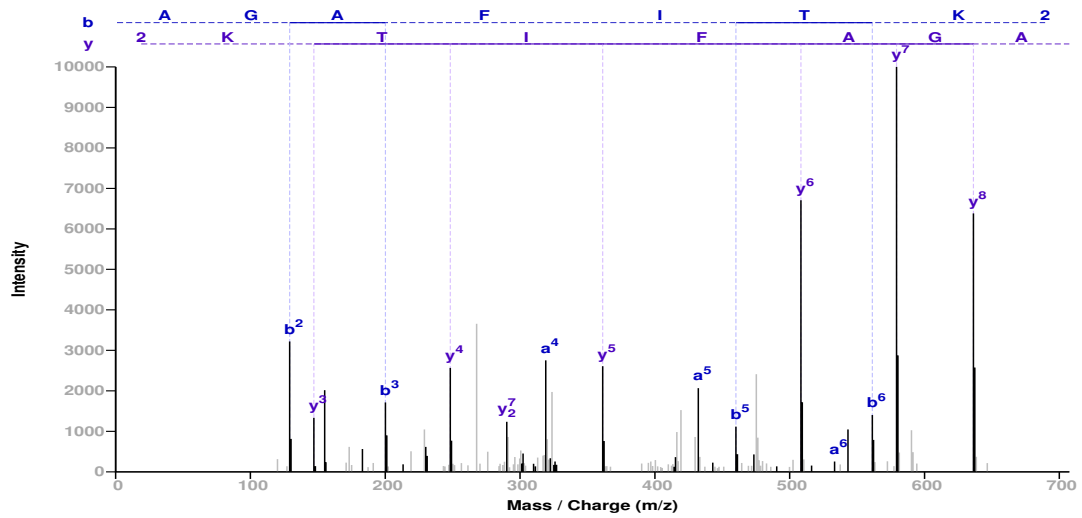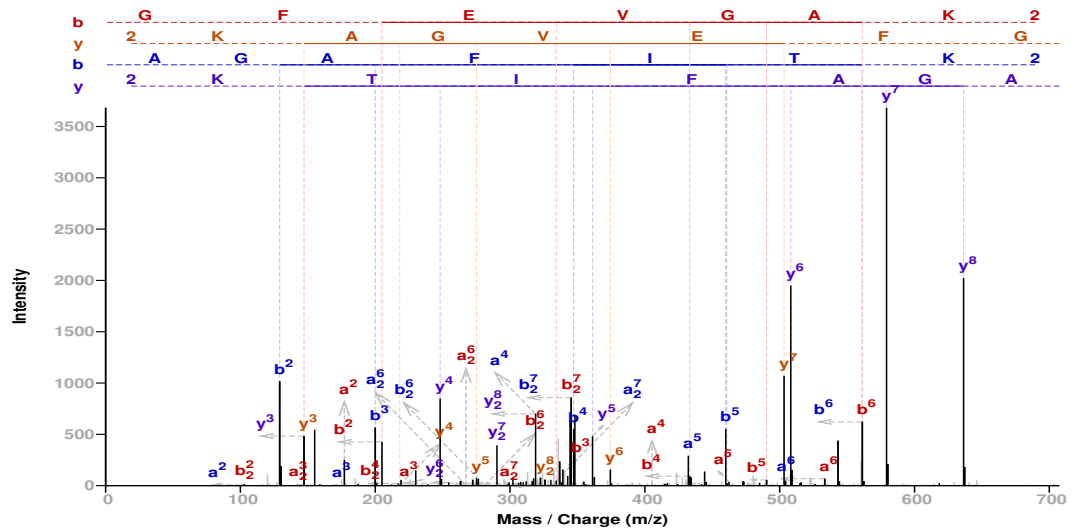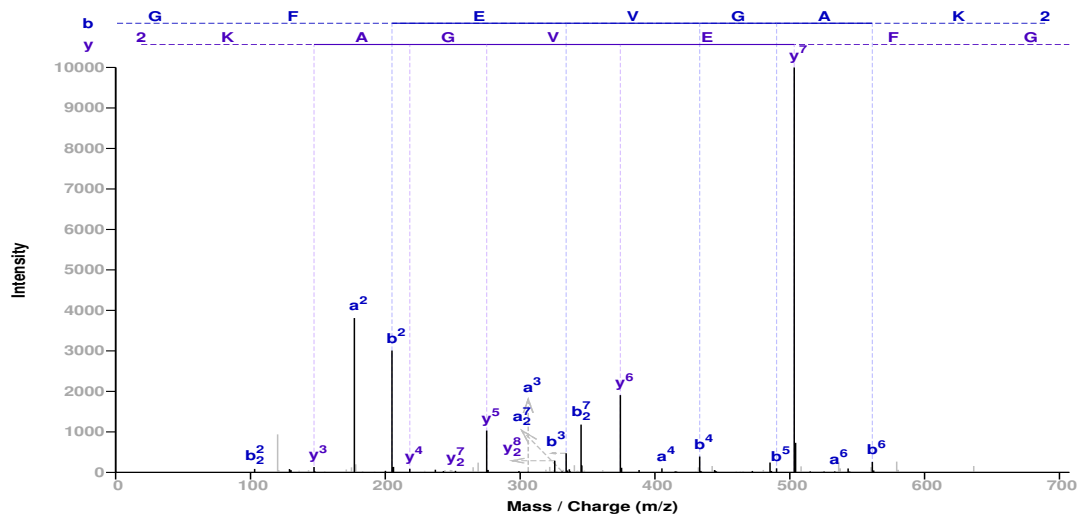

yeast1\_Scan\_Number\_1340 Precursor m/z: 654.872 cosine: 0.817  $\alpha$ : 0.282

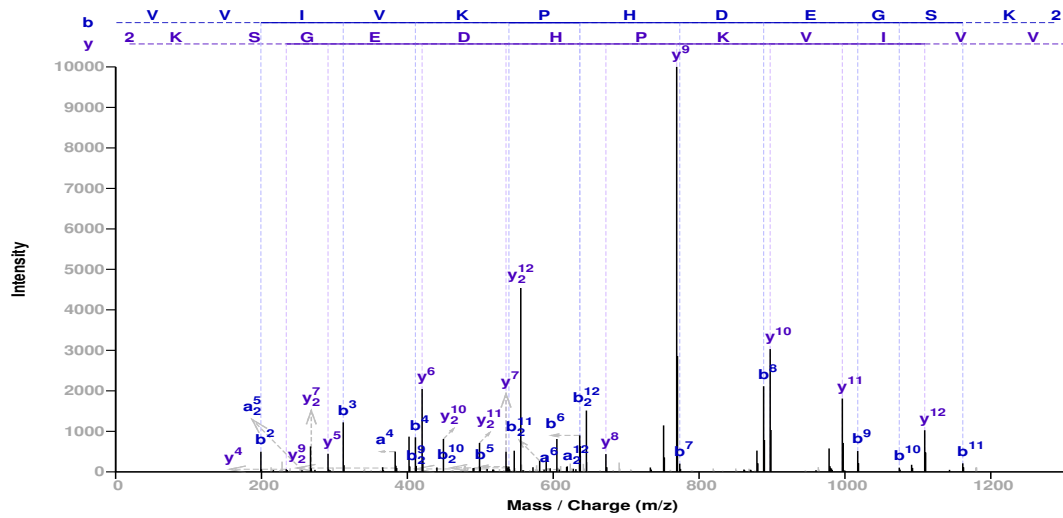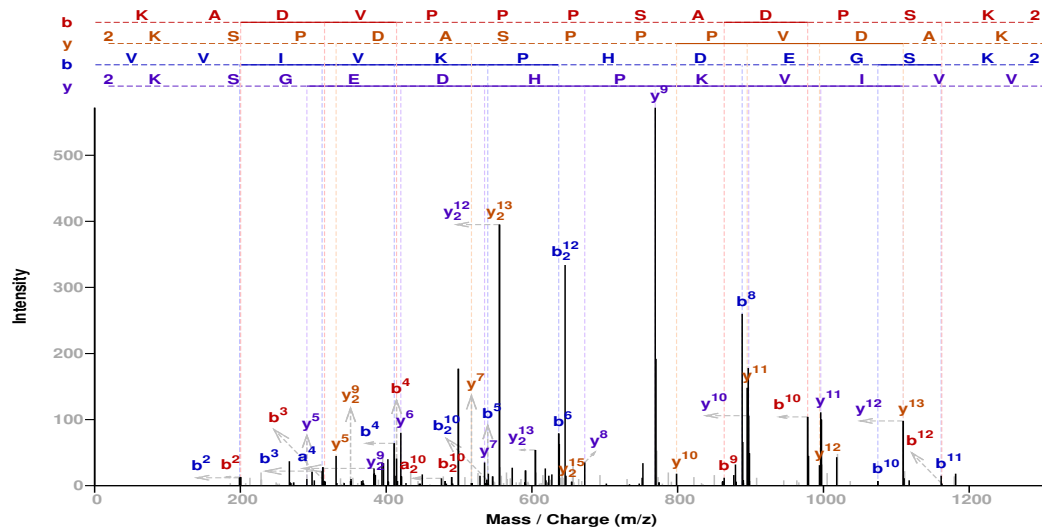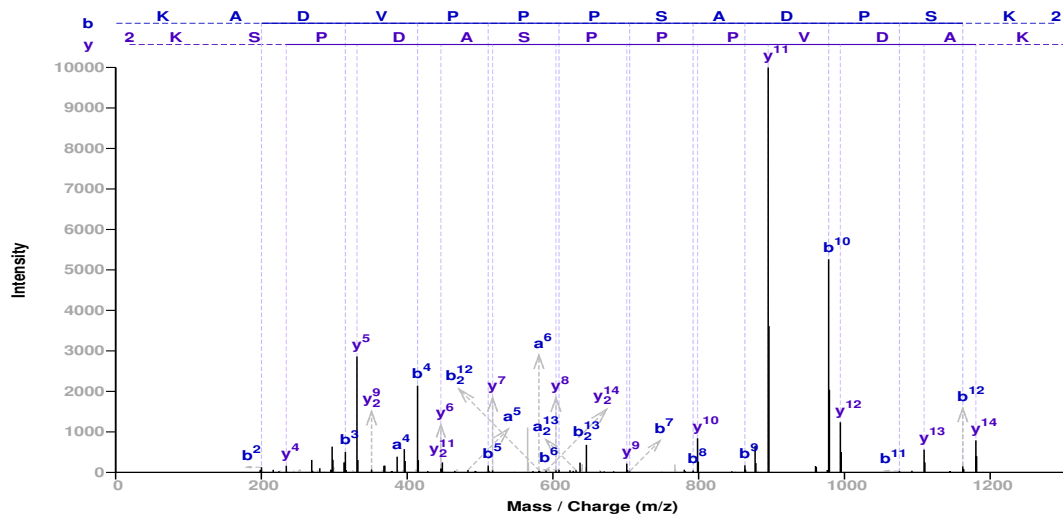

yeast1\_Scan\_Number\_2596 Precursor m/z: 612.829 cosine: 0.831  $\alpha$ : 0.281

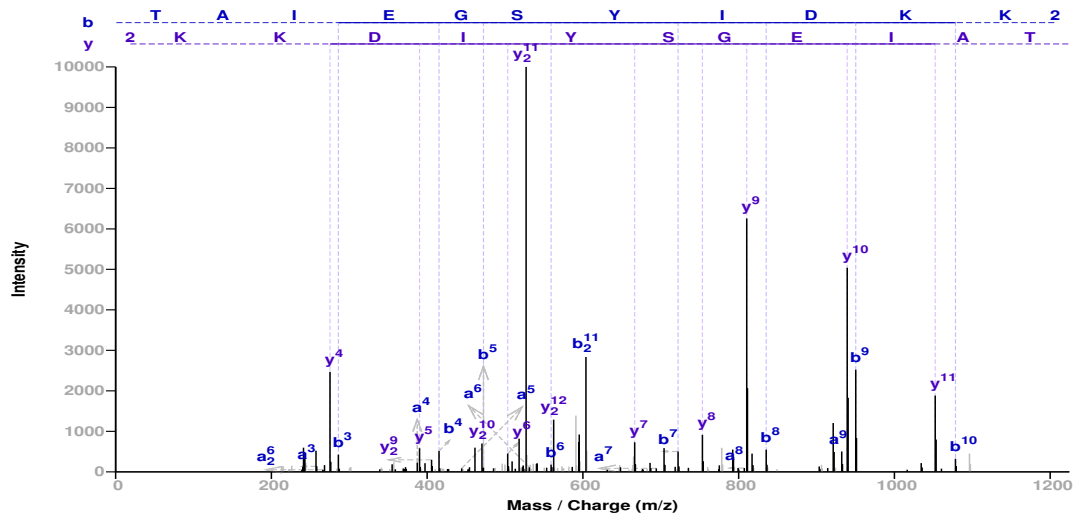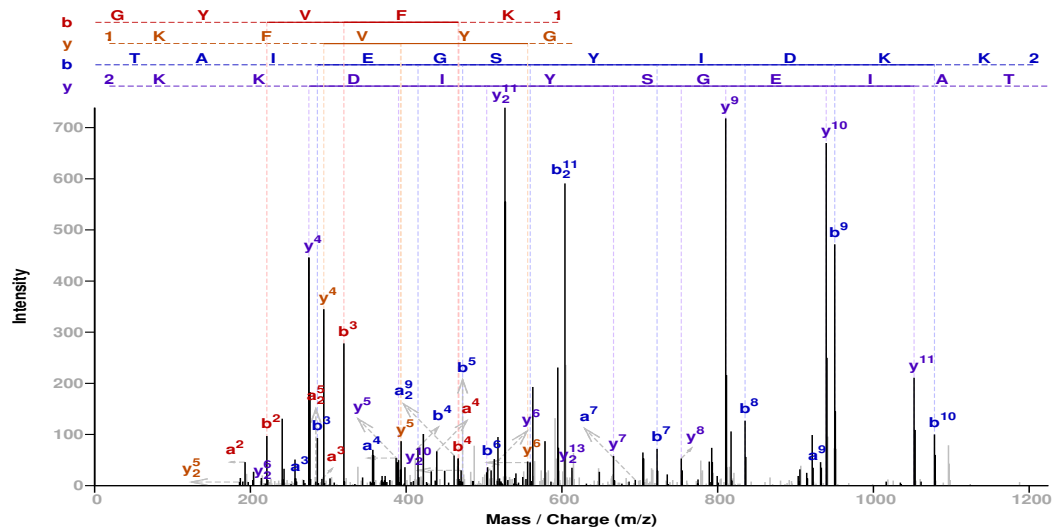

yeast1\_Scan\_Number\_6564 Precursor m/z: 622.356 cosine: 0.773  $\alpha$ : 0.280

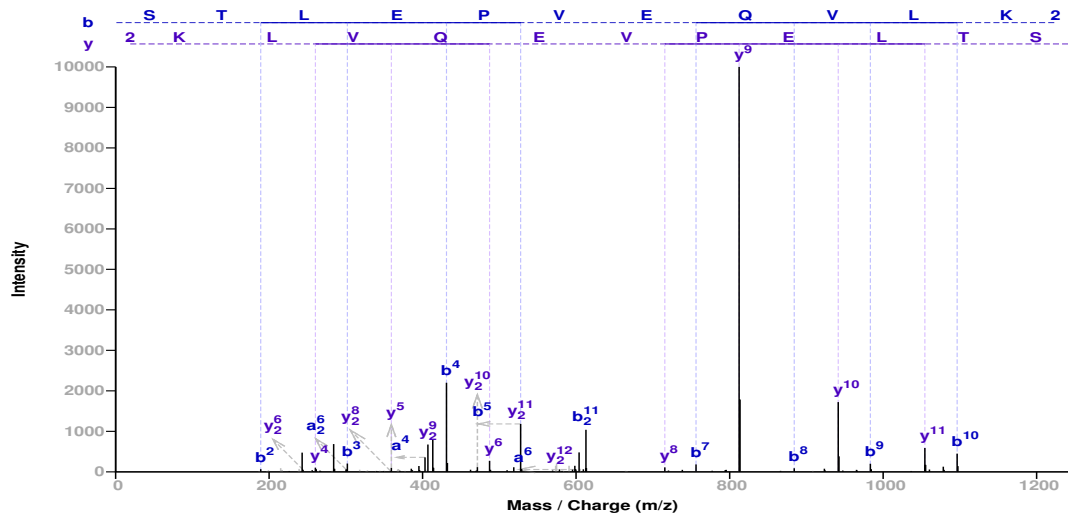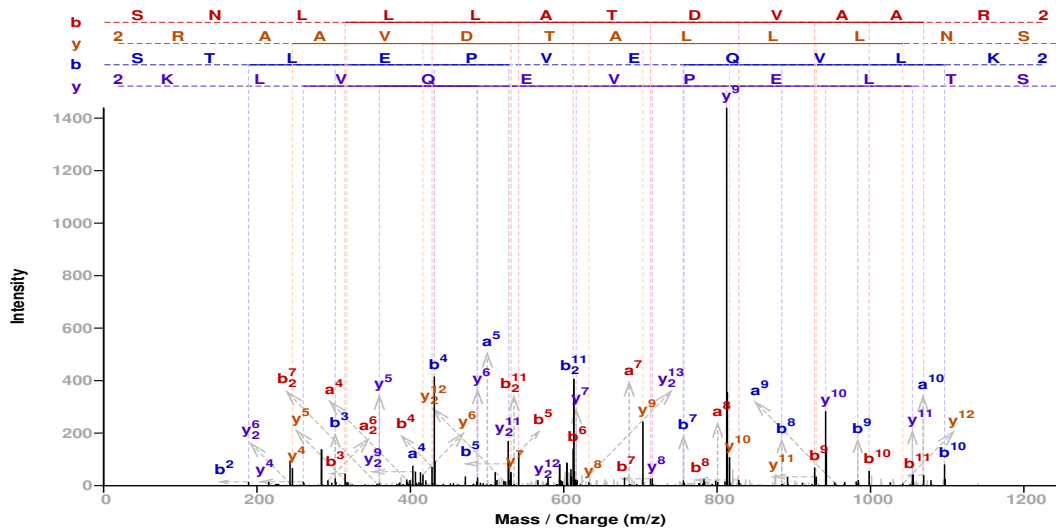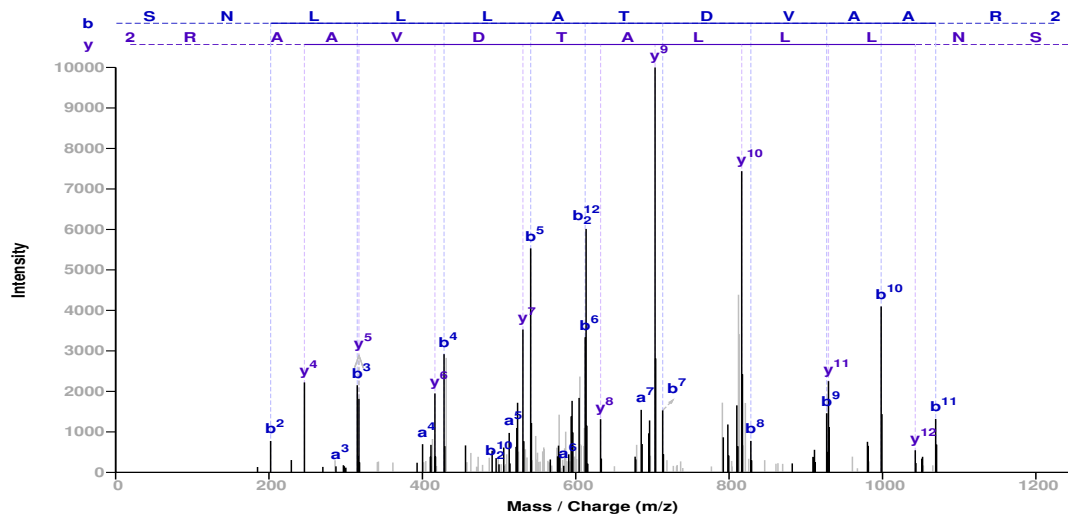



yeast1\_Scan\_Number\_7475 Precursor m/z: 667.831 cosine: 0.821  $\alpha$ : 0.278

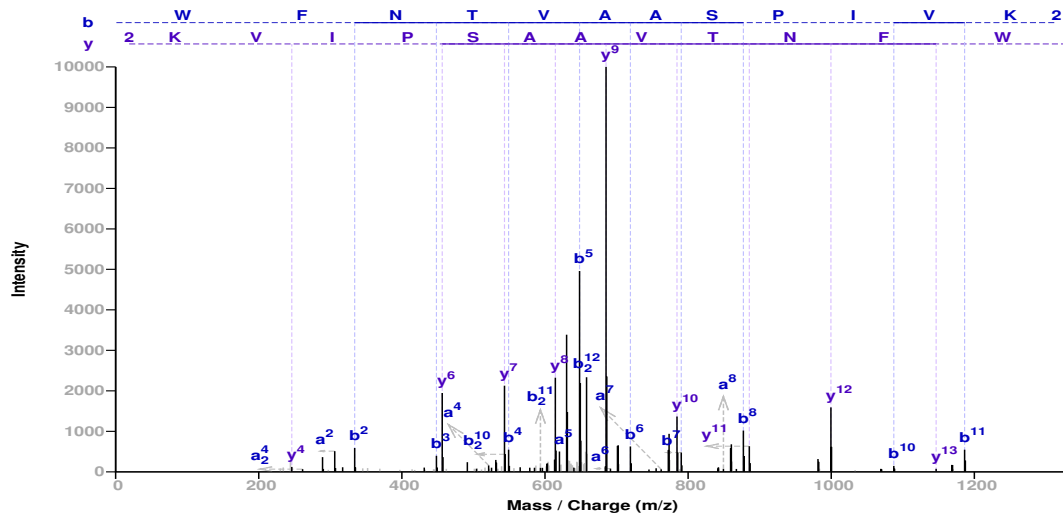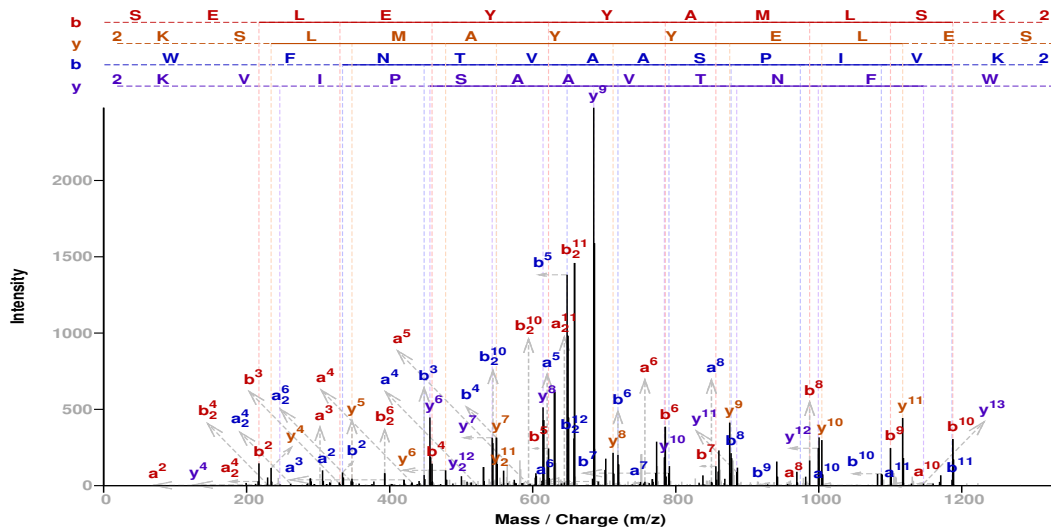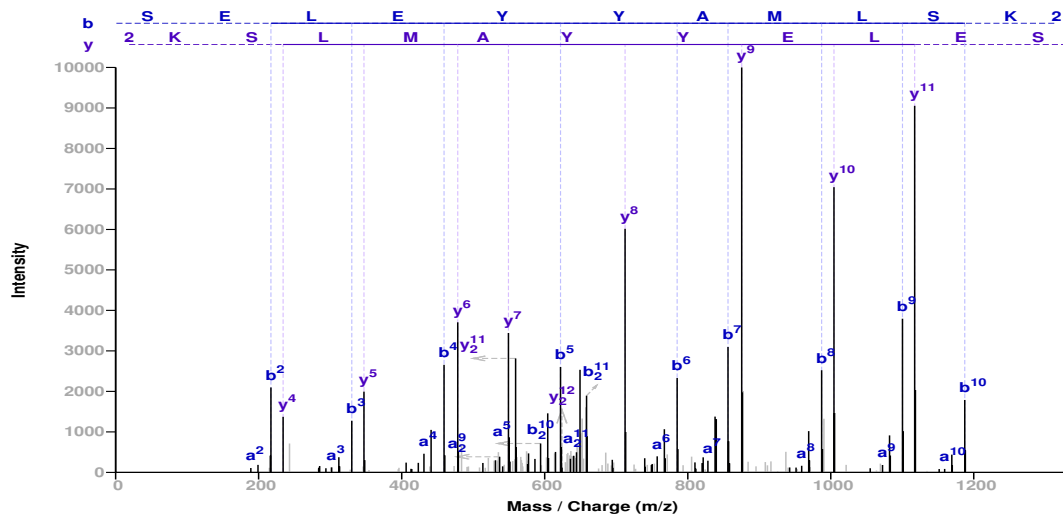

yeast1\_Scan\_Number.1542 Precursor m/z: 415.199 cosine: 0.867  $\alpha$ : 0.276

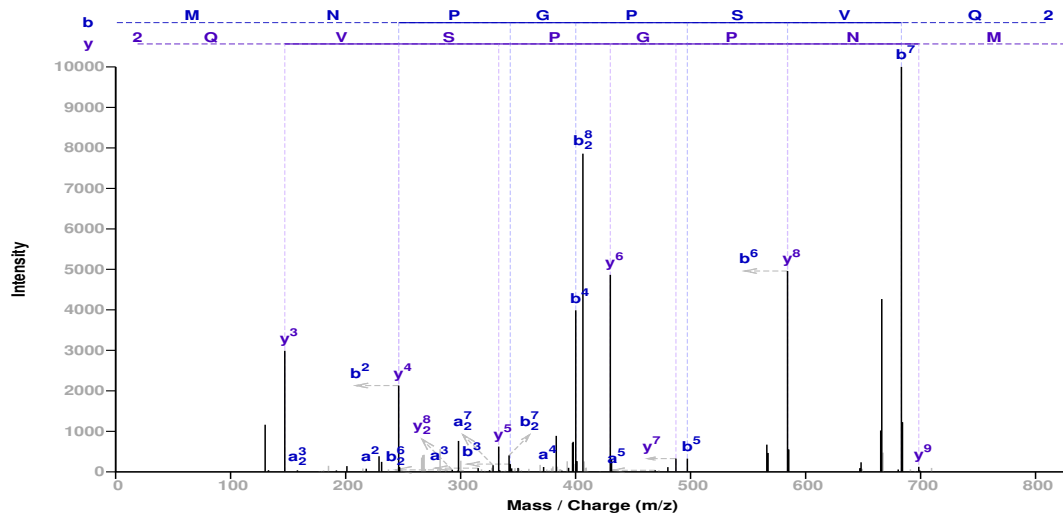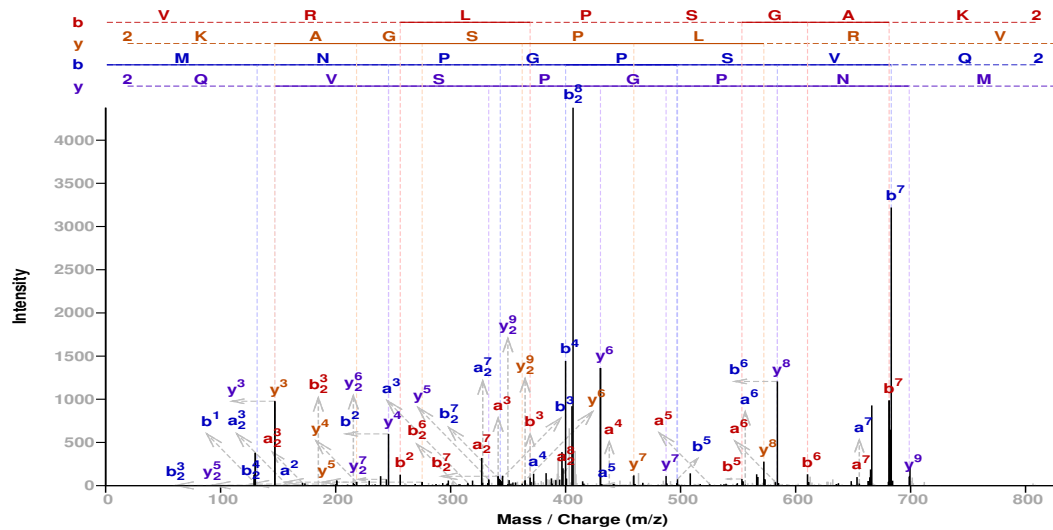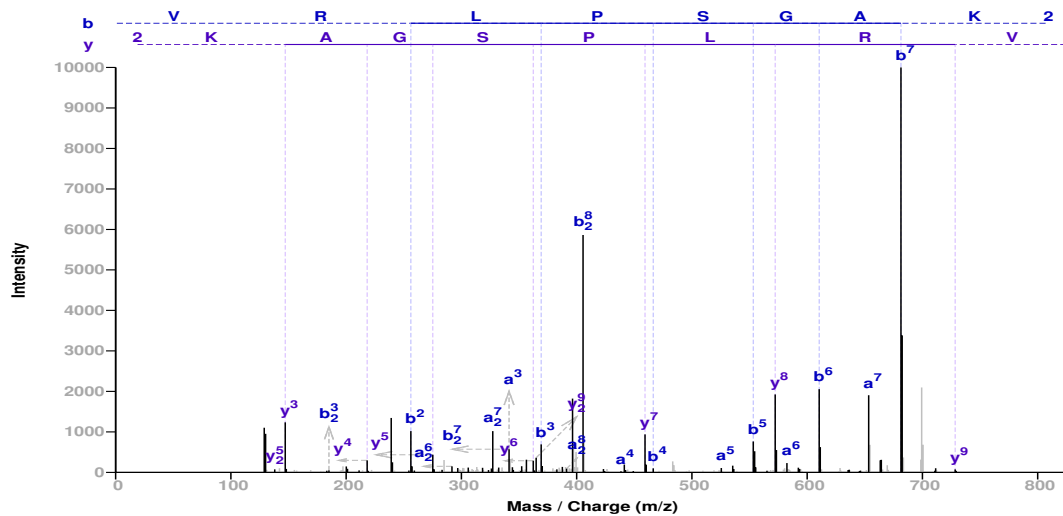



yeast1\_Scan\_Number\_2373 Precursor m/z: 414.207 cosine: 0.804  $\alpha$ : 0.273

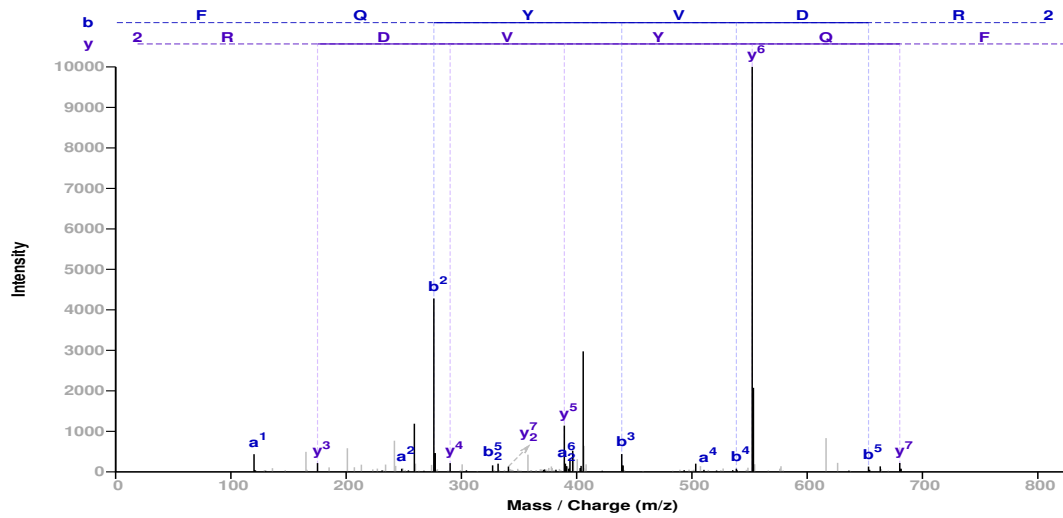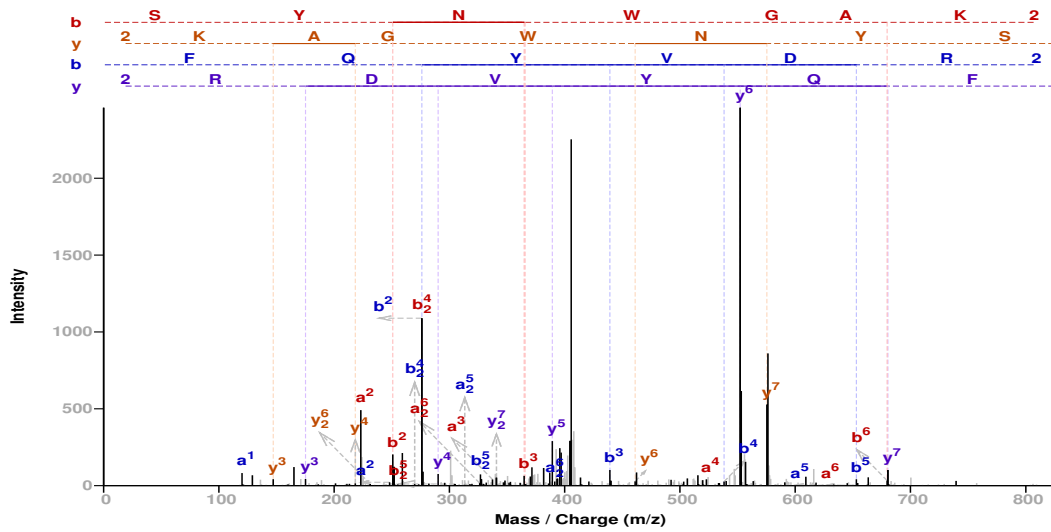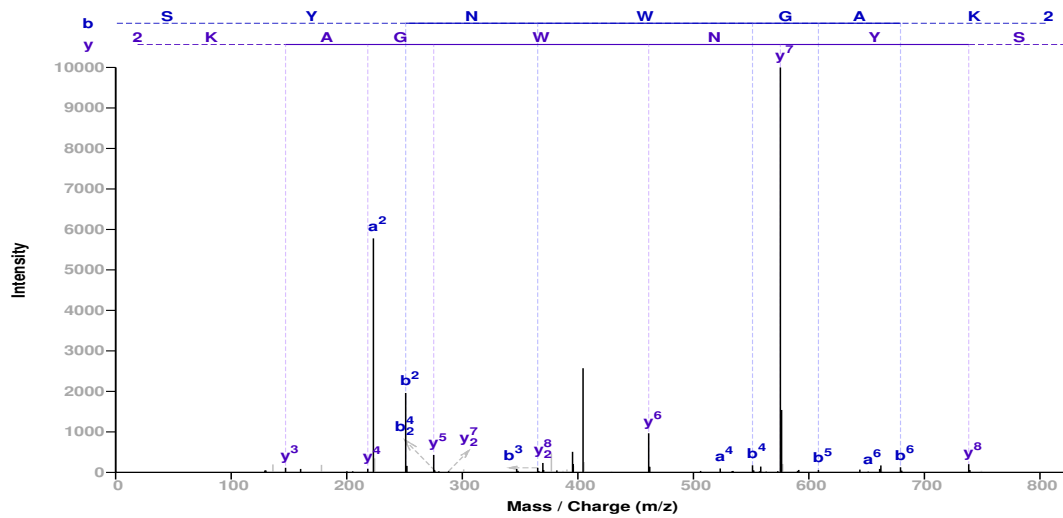



yeast1\_Scan\_Number\_2835 Precursor m/z: 352.212 cosine: 0.927  $\alpha$ : 0.272

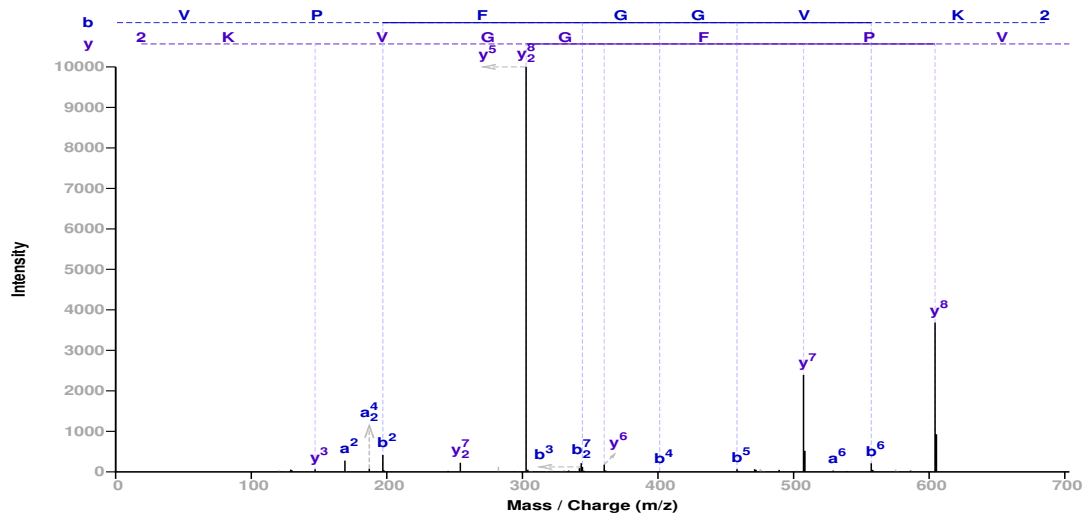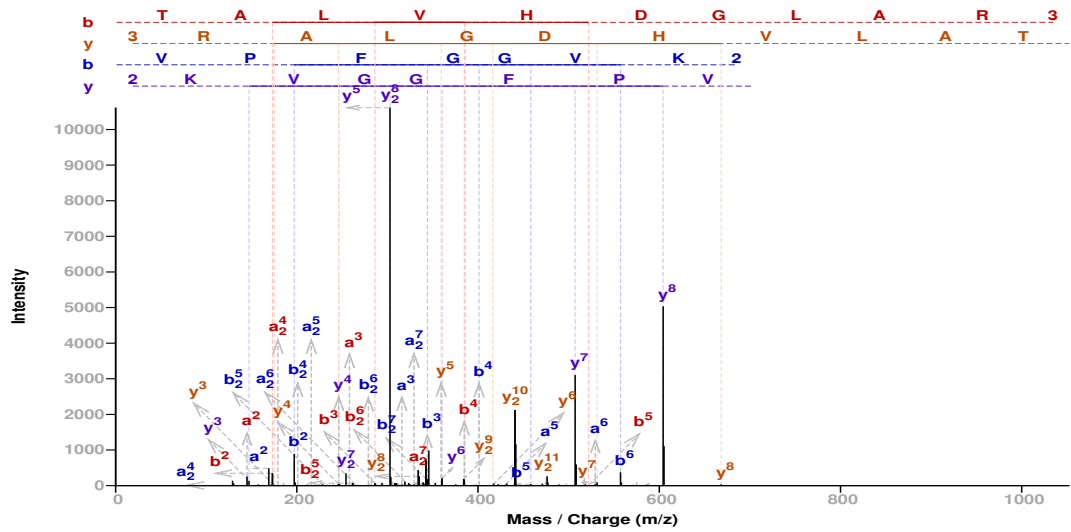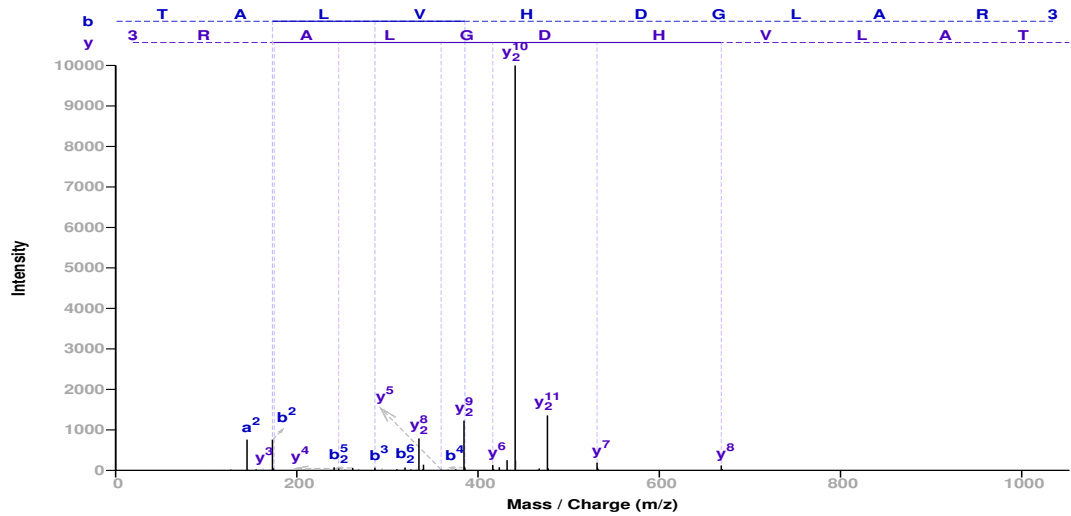

yeast1\_Scan\_Number\_3585 Precursor m/z: 595.638 cosine: 0.771  $\alpha$ : 0.272

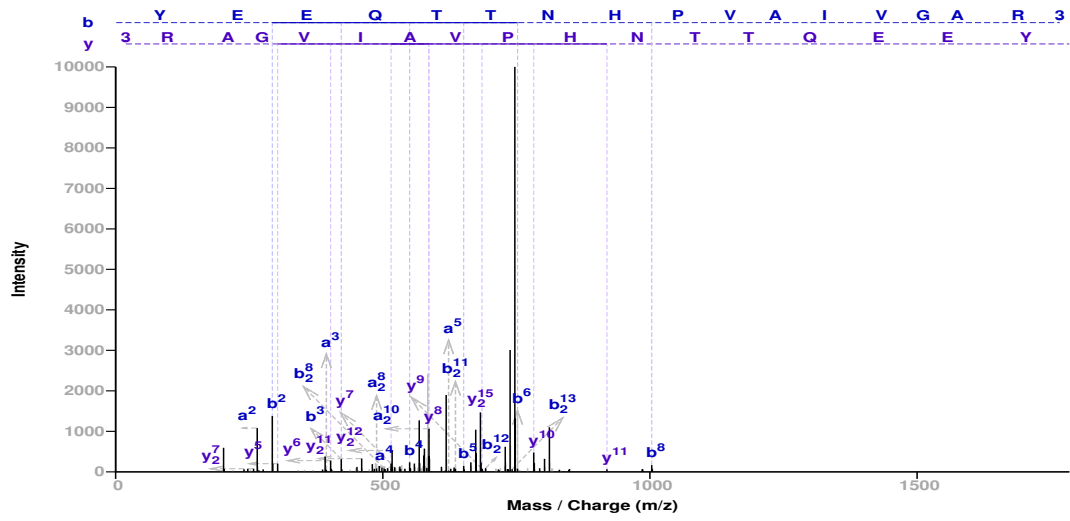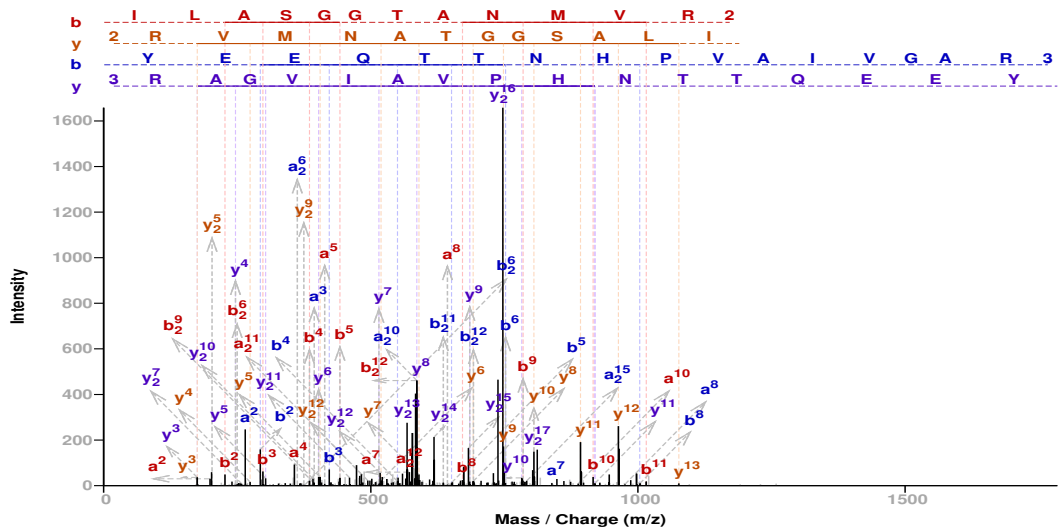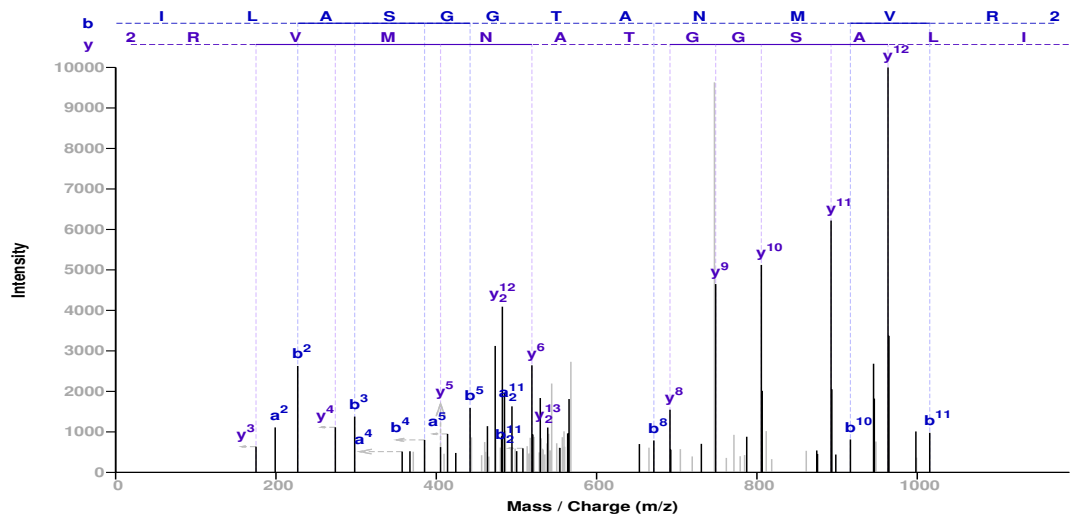

yeast1\_Scan\_Number\_759 Precursor m/z: 463.280 cosine: 0.795  $\alpha$ : 0.271

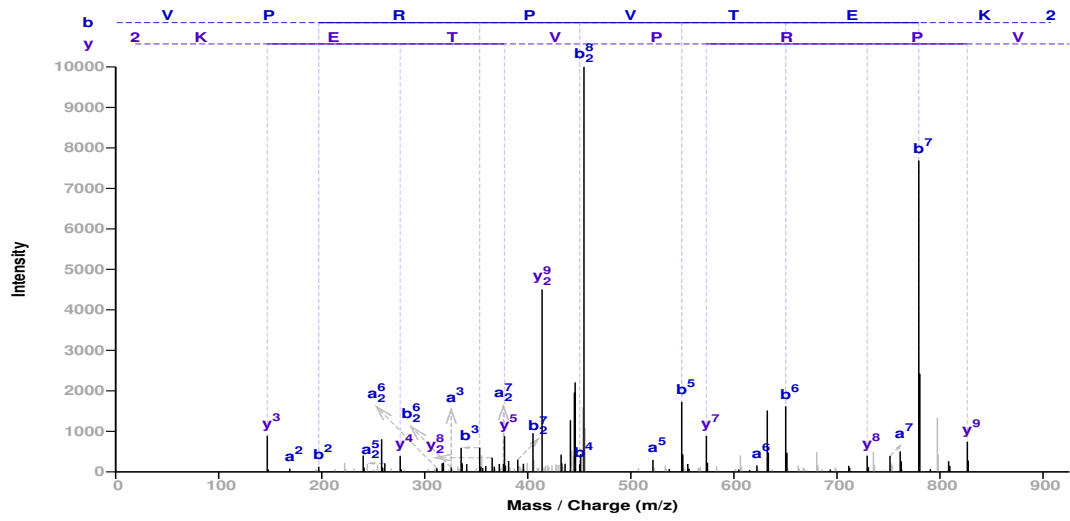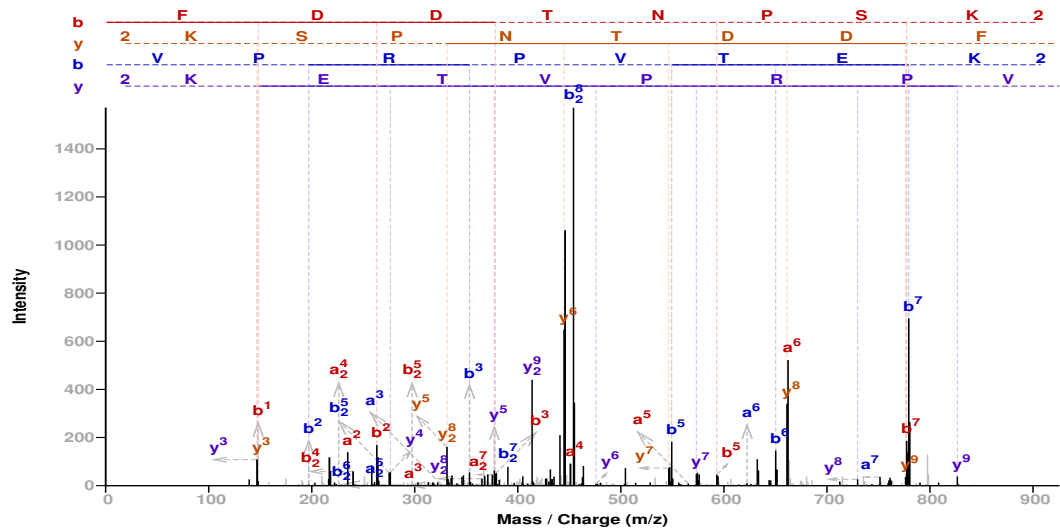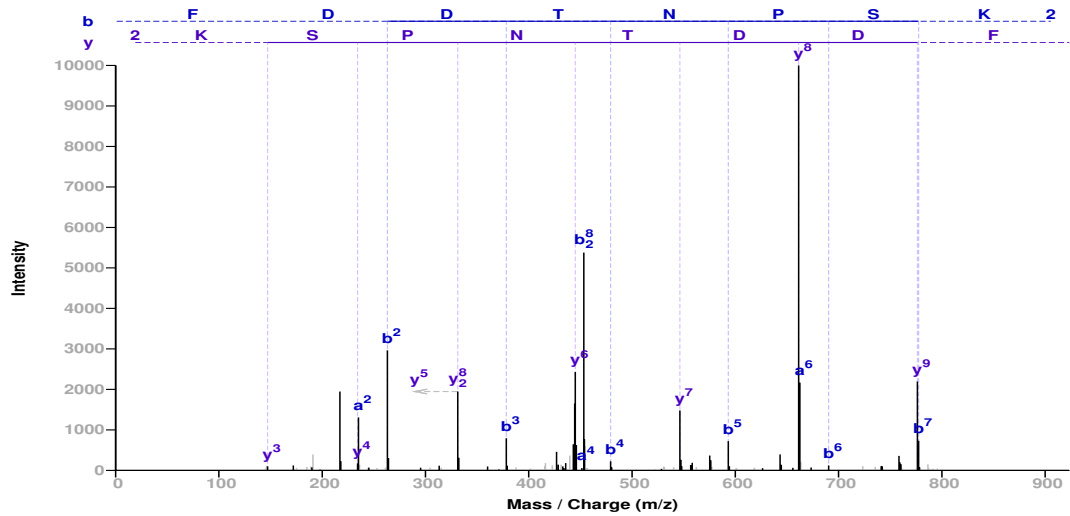



yeast1\_Scan\_Number\_7337 Precursor m/z: 600.343 cosine: 0.833  $\alpha$ : 0.270

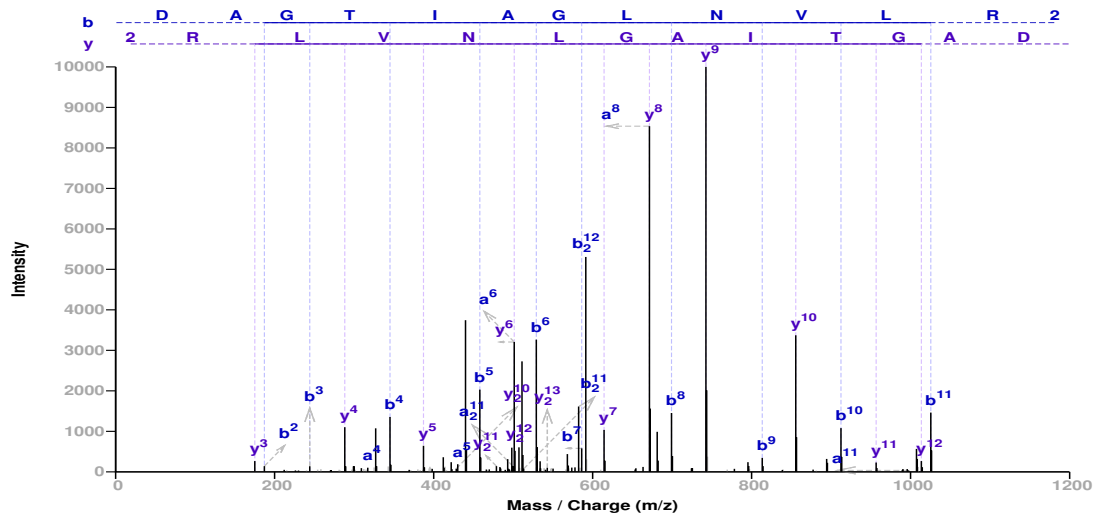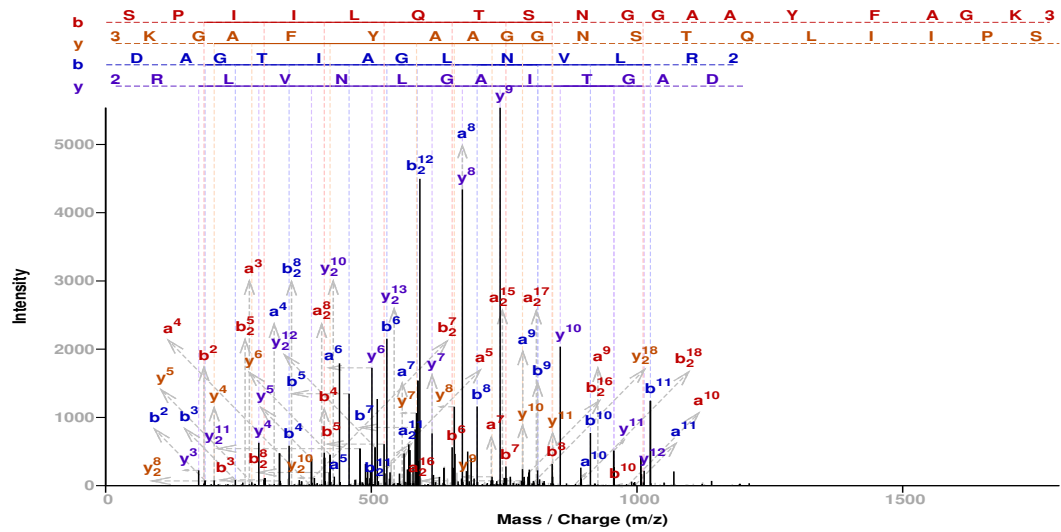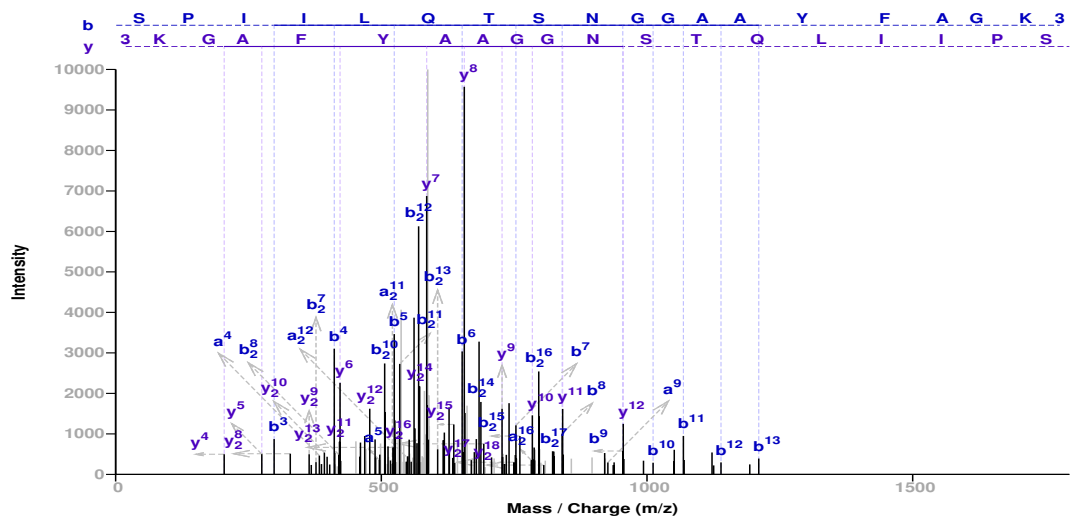

yeast1\_Scan\_Number\_1012 Precursor m/z: 451.231 cosine: 0.806  $\alpha$ : 0.270

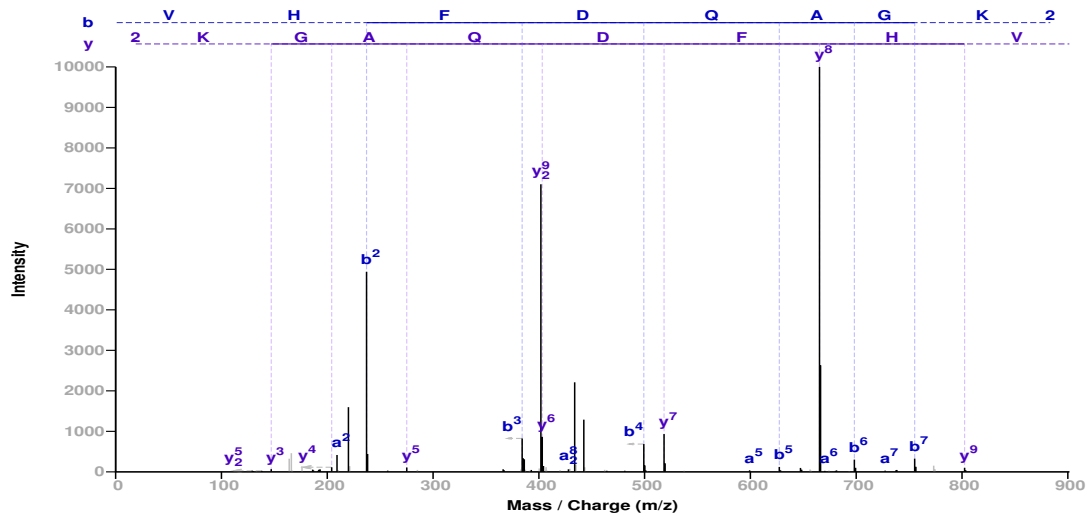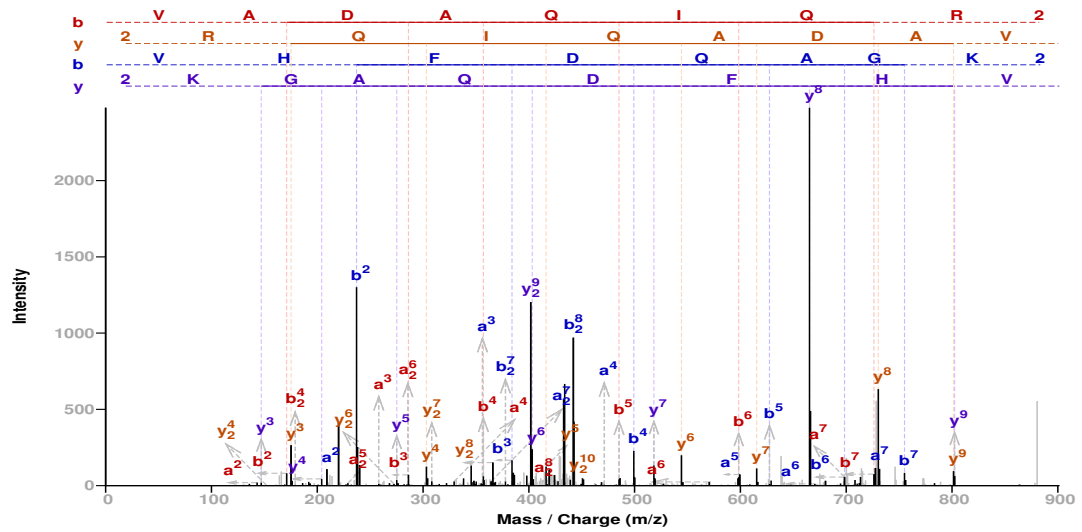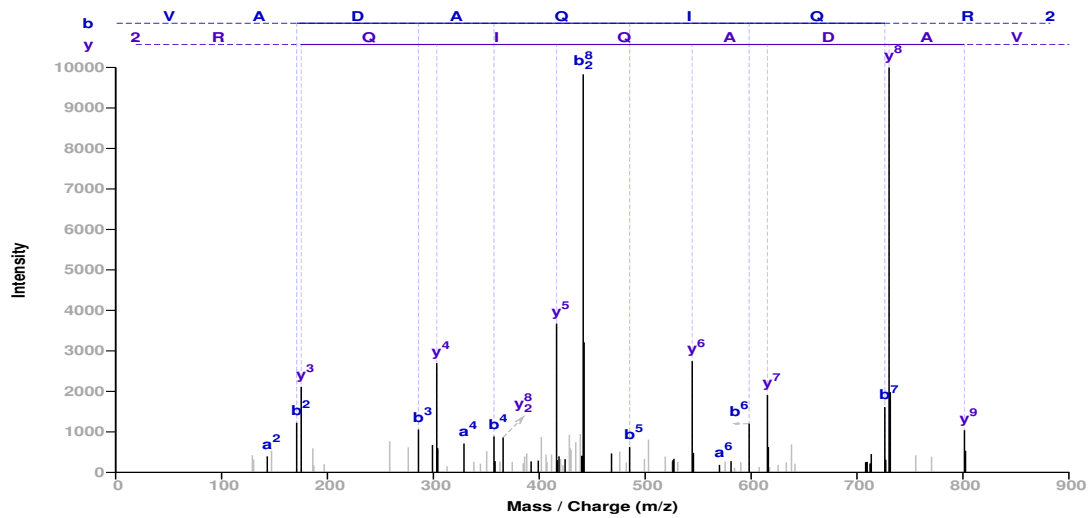

yeast1\_Scan\_Number\_9419 Precursor m/z: 789.909 cosine: 0.809  $\alpha$ : 0.268

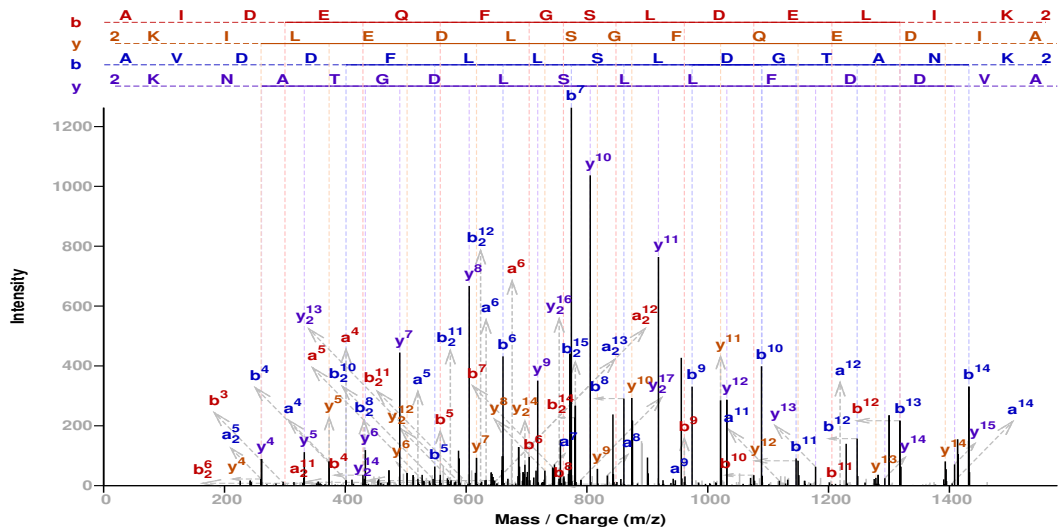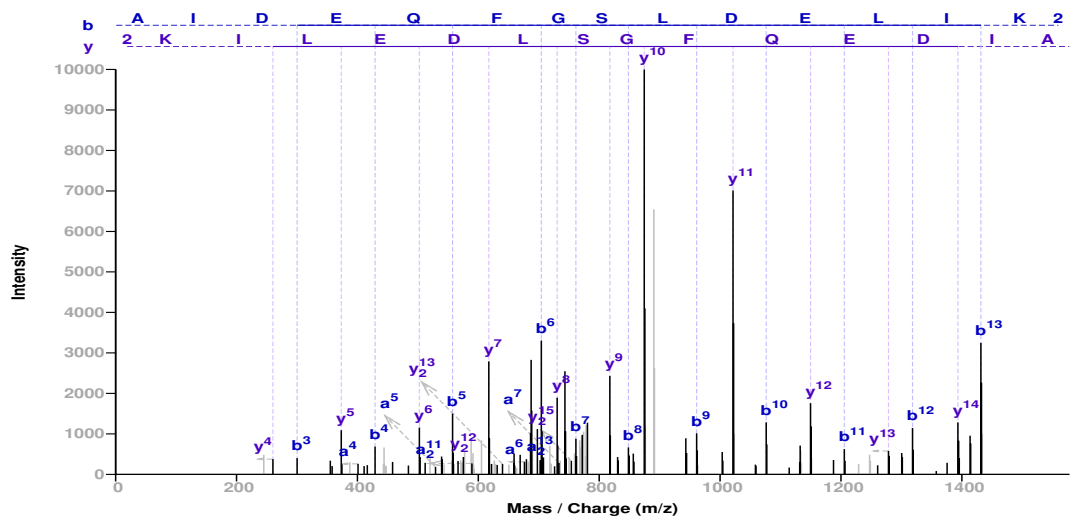

yeast1\_Scan\_Number\_3623 Precursor m/z: 473.272 cosine: 0.849  $\alpha$ : 0.267

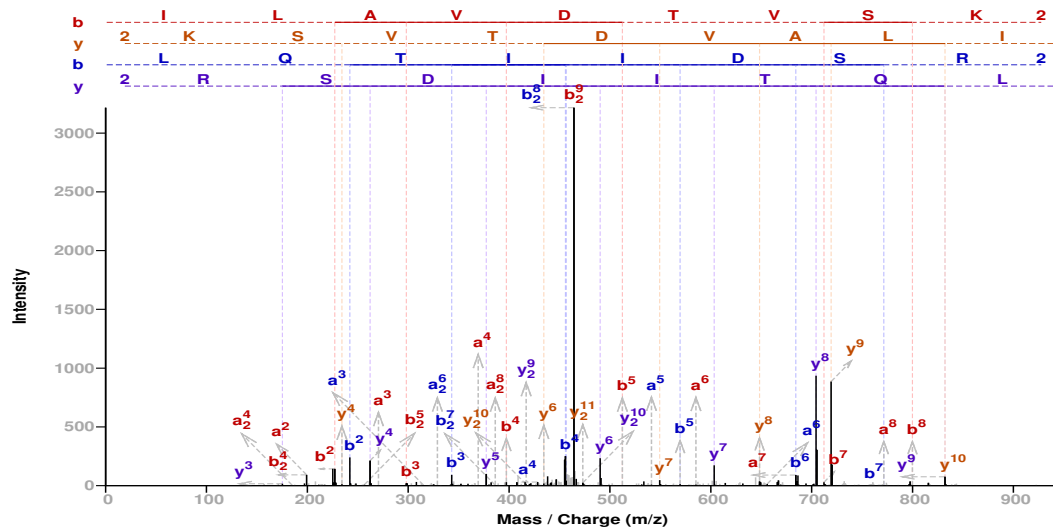

yeast1\_Scan\_Number\_364 Precursor m/z: 409.227 cosine: 0.857  $\alpha$ : 0.265

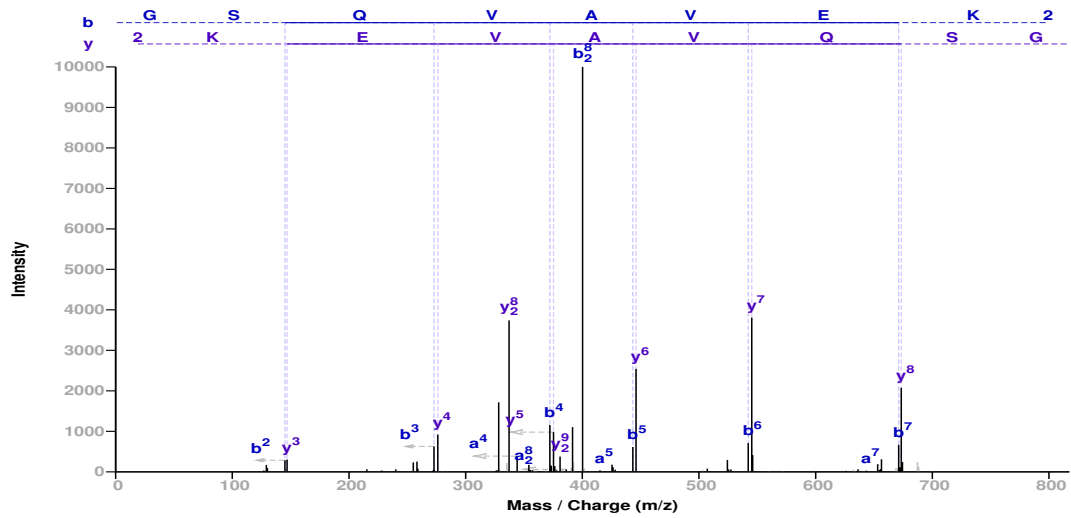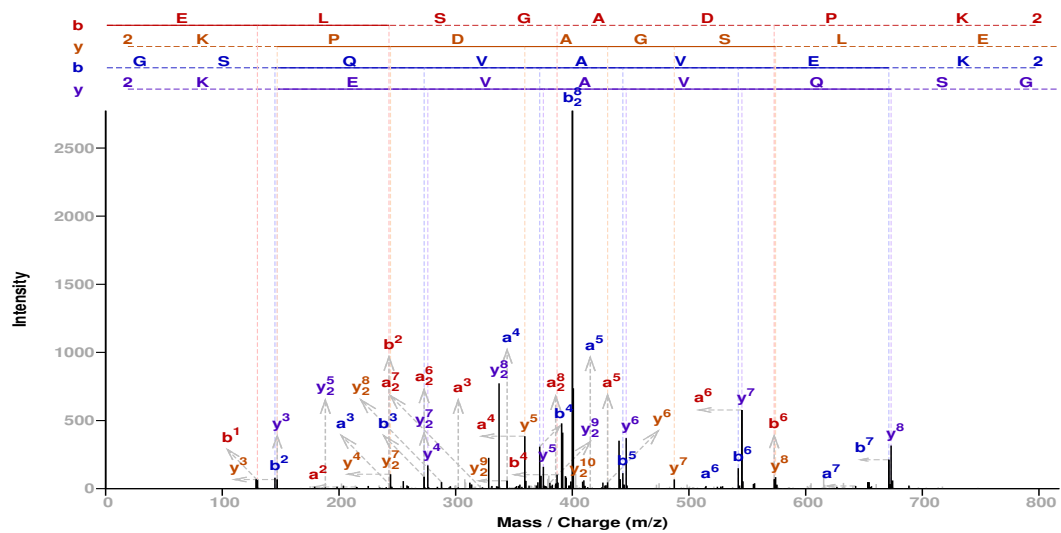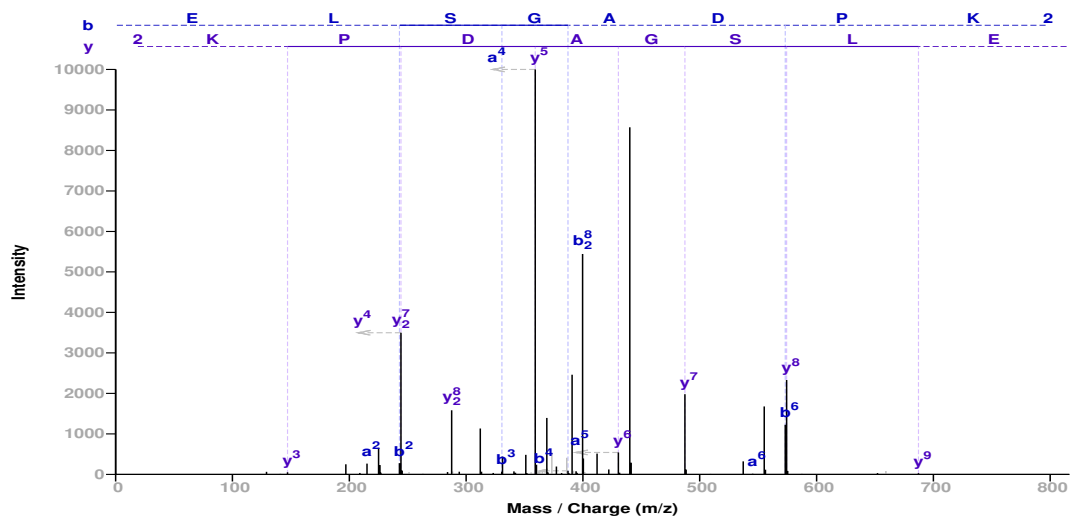

yeast1\_Scan\_Number\_1866 Precursor m/z: 442.555 cosine: 0.796  $\alpha$ : 0.261

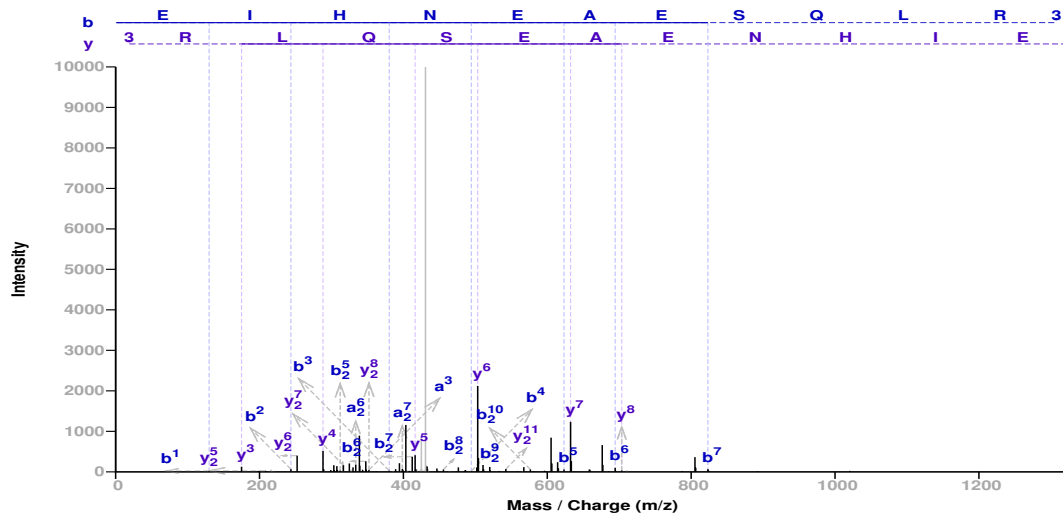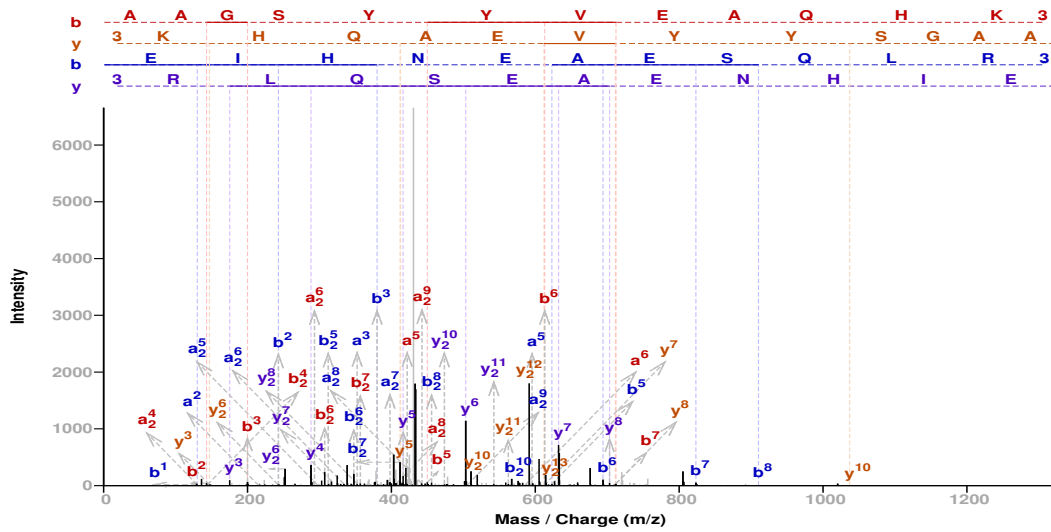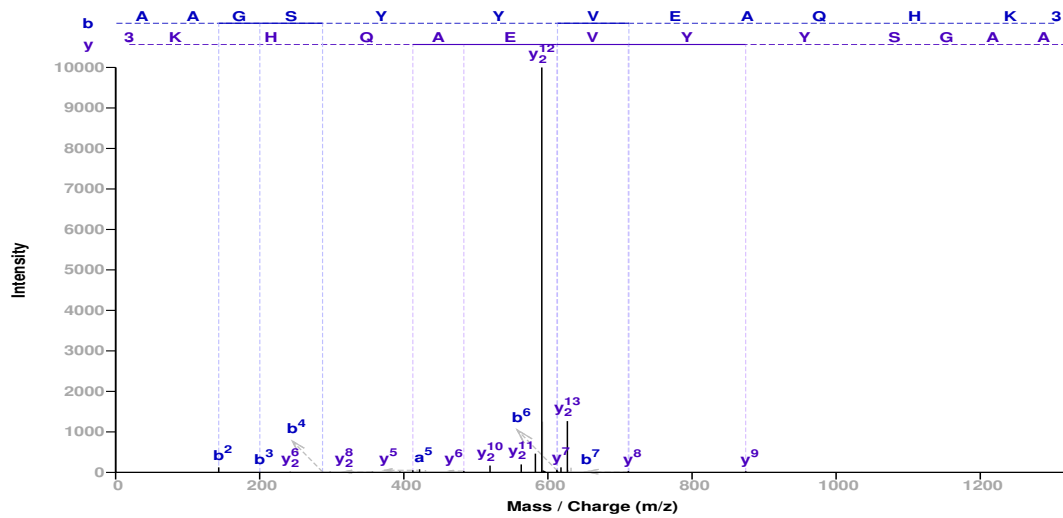

yeast1.Scan\_Number\_4911 Precursor m/z: 436.759 cosine: 0.779  $\alpha$ : 0.259

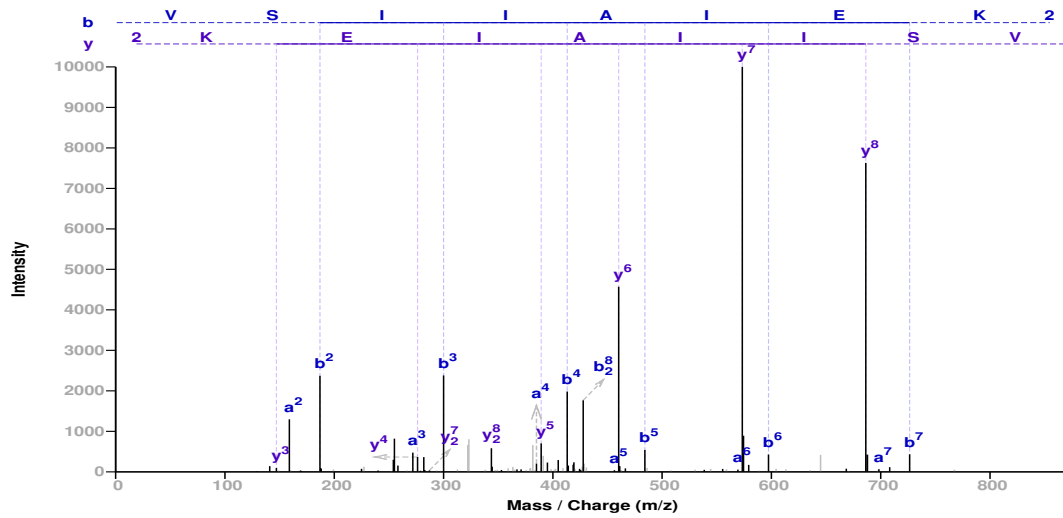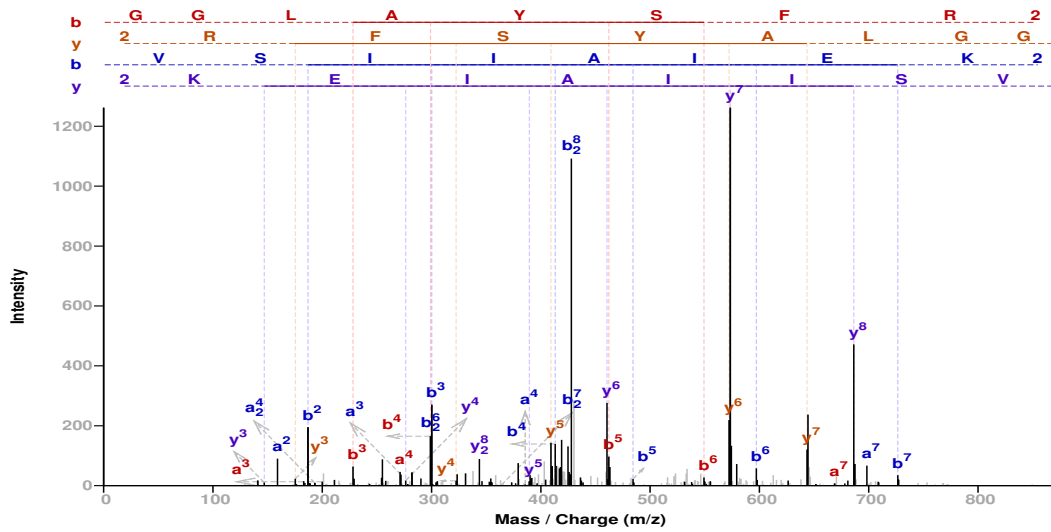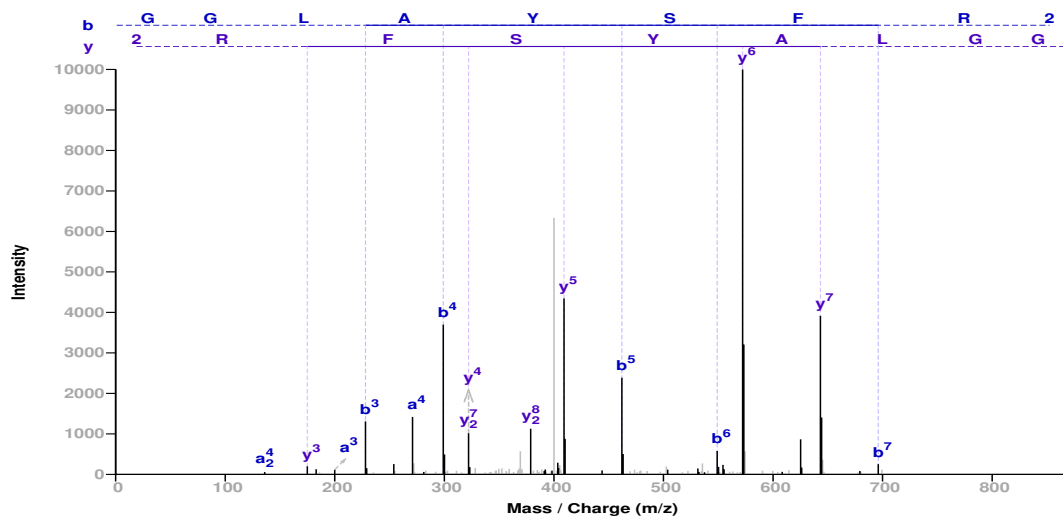

yeast1\_Scan\_Number\_2511 Precursor m/z: 521.259 cosine: 0.873  $\alpha$ : 0.258

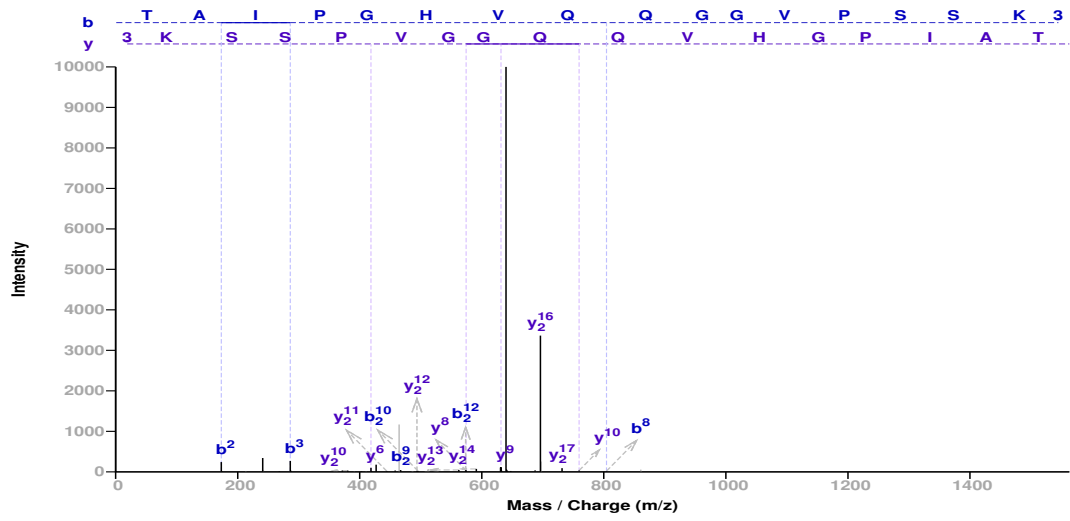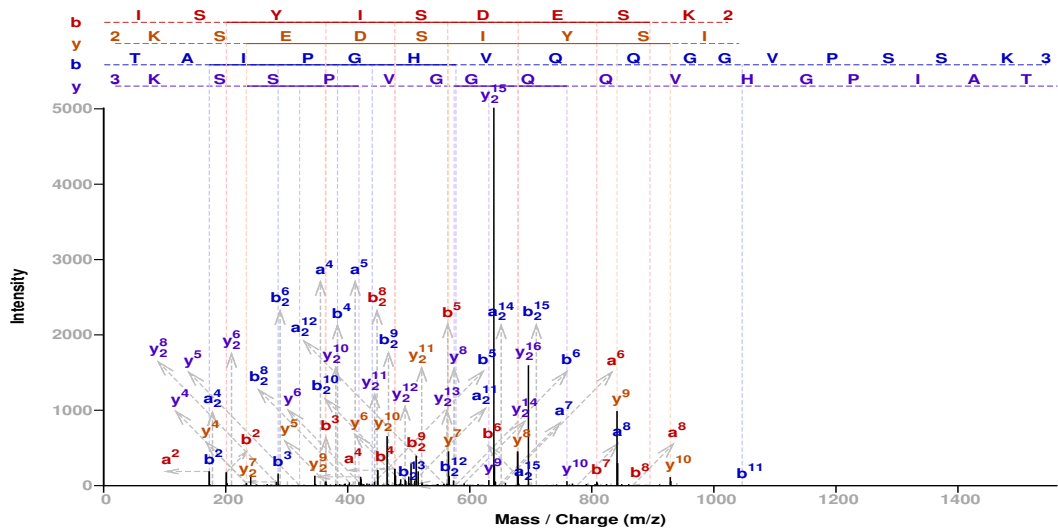





yeast1\_Scan\_Number\_2550 Precursor m/z: 479.770 cosine: 0.760  $\alpha$ : 0.255

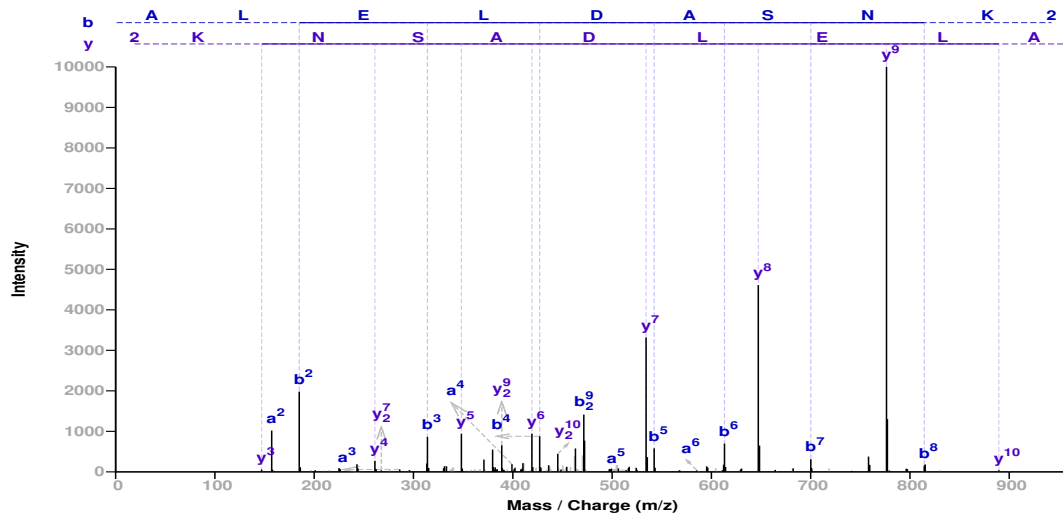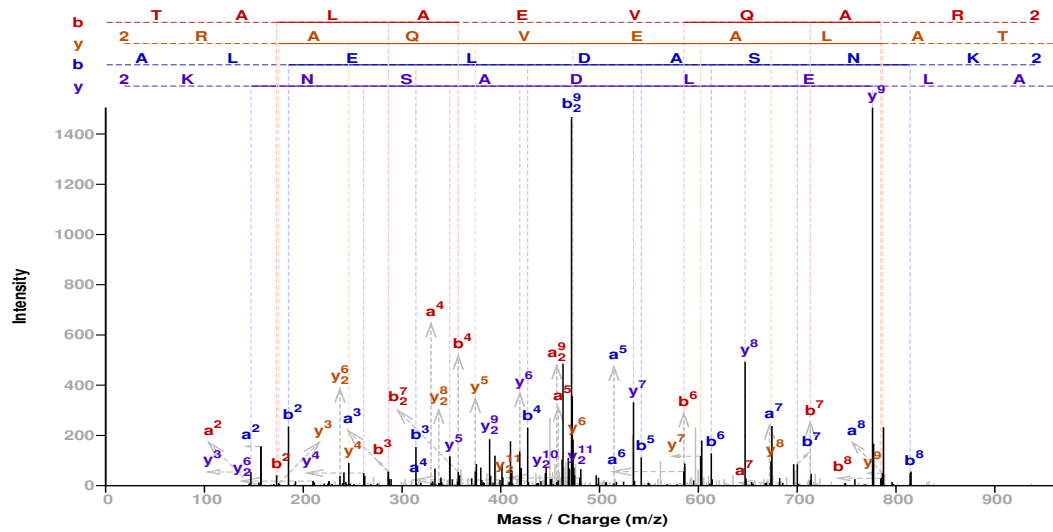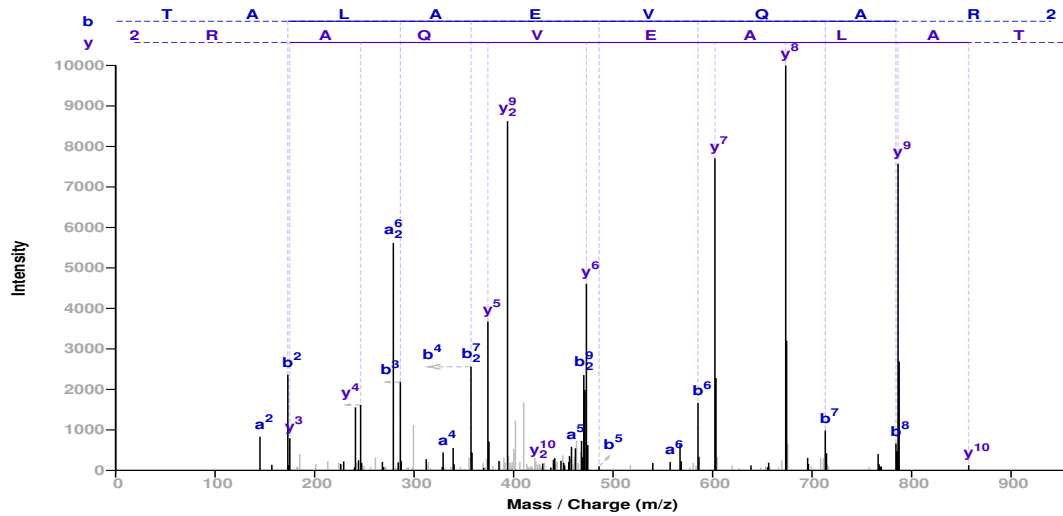

yeast1\_Scan\_Number\_6523 Precursor m/z: 567.813 cosine: 0.752  $\alpha$ : 0.251

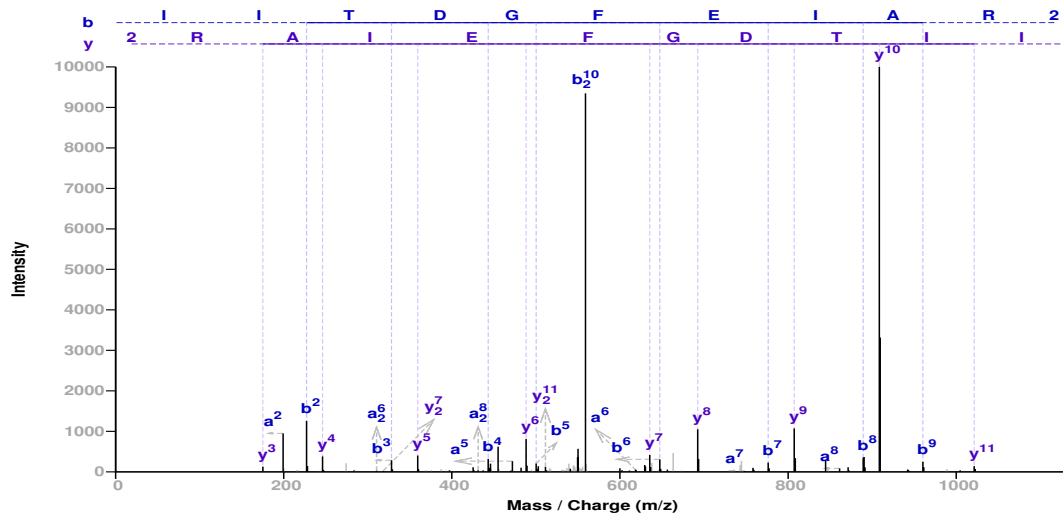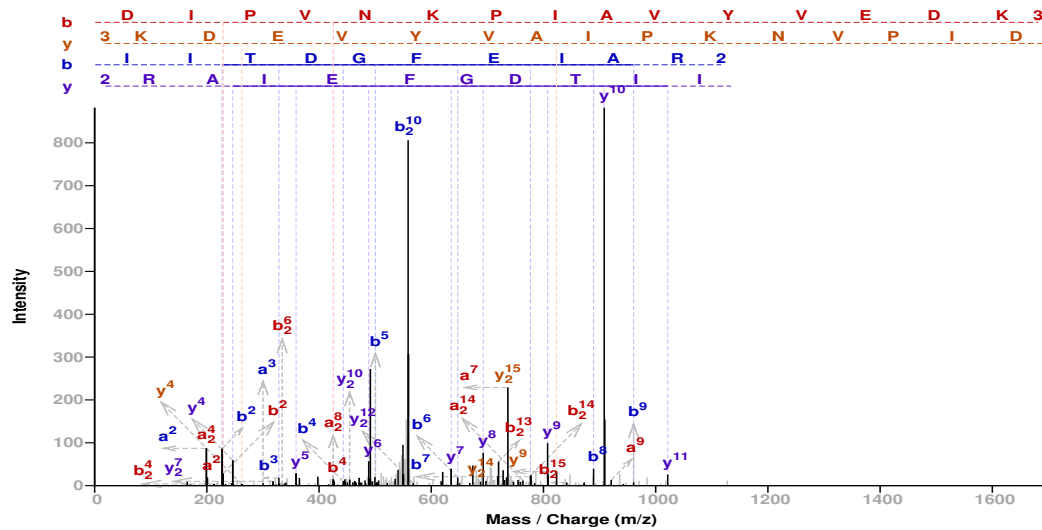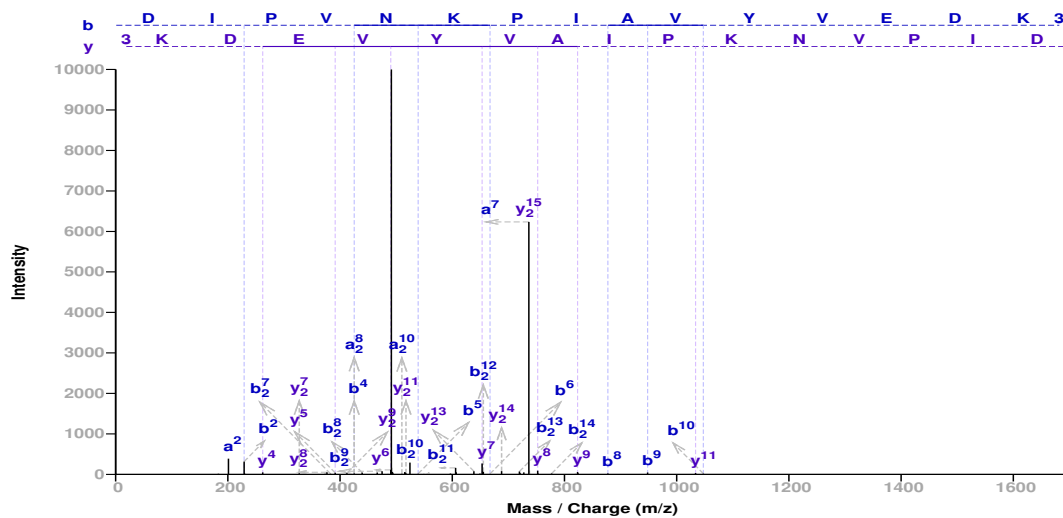

yeast1\_Scan\_Number\_9117 Precursor m/z: 639.835 cosine: 0.845  $\alpha$ : 0.247

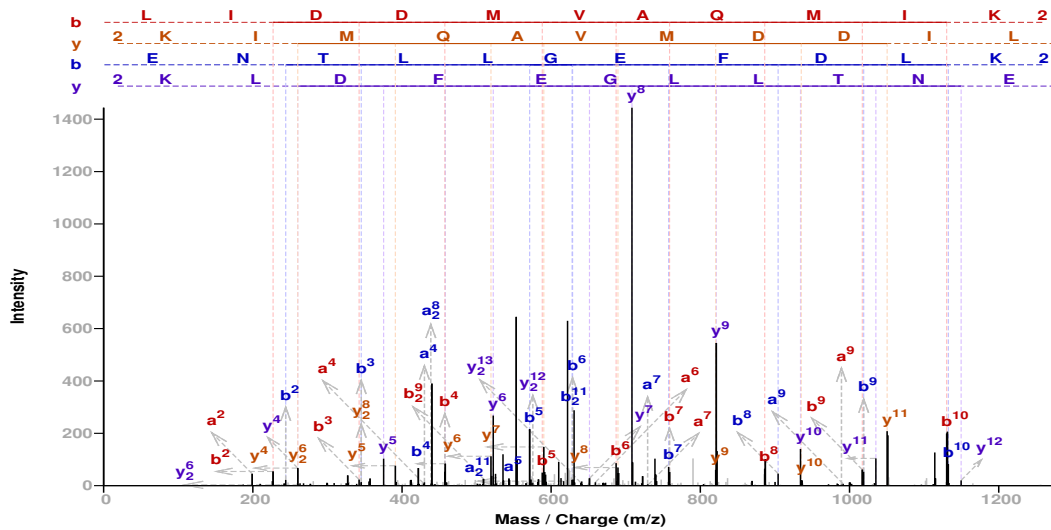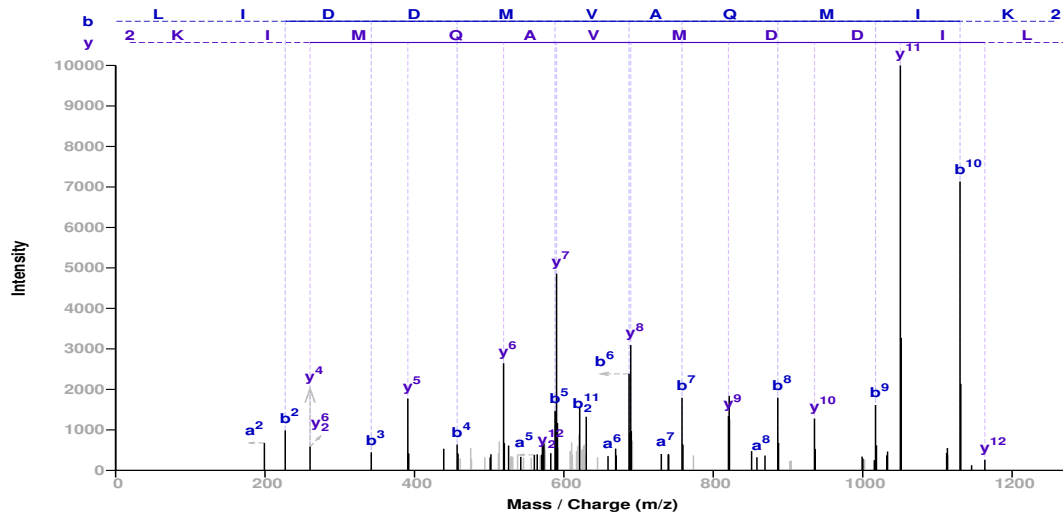

yeast1\_Scan\_Number\_3481 Precursor m/z: 397.547 cosine: 0.750  $\alpha$ : 0.243

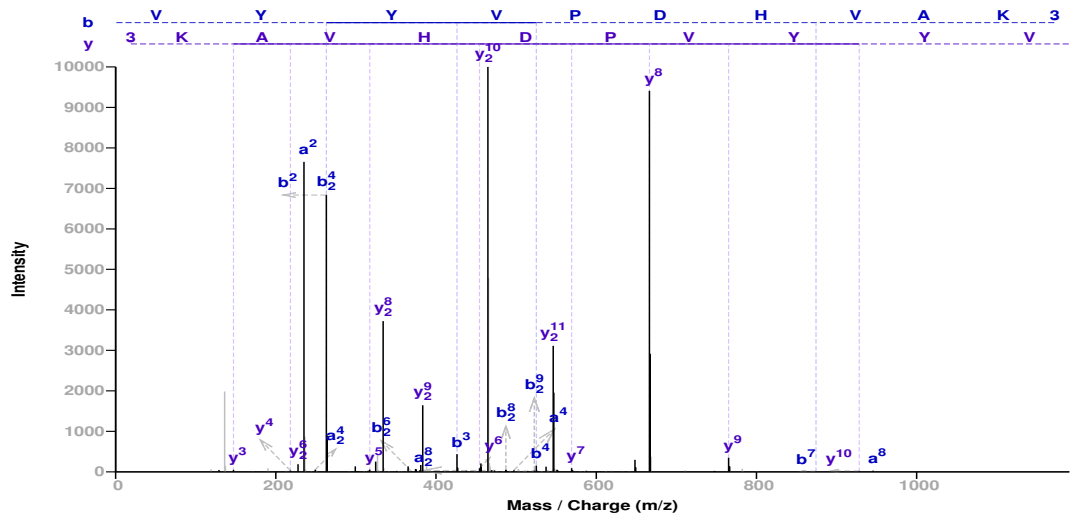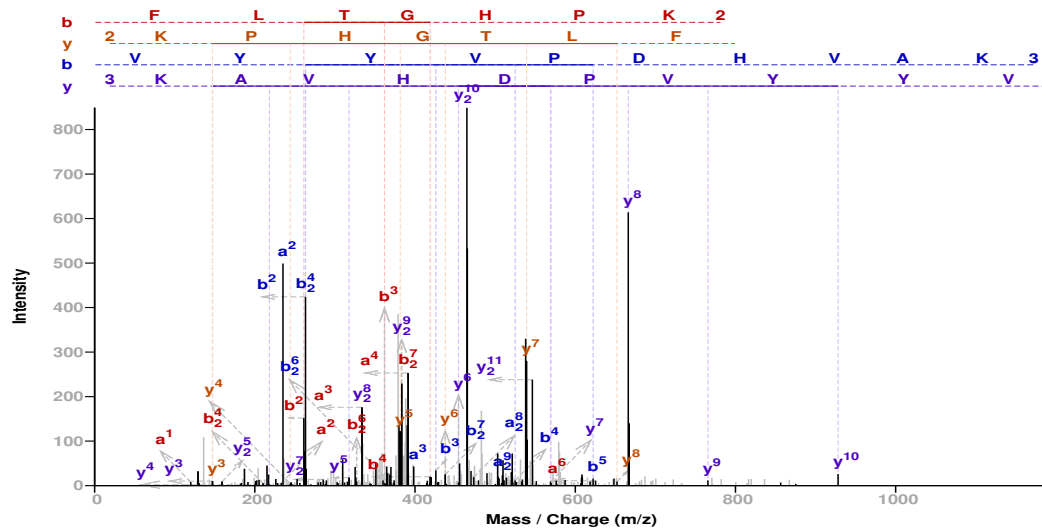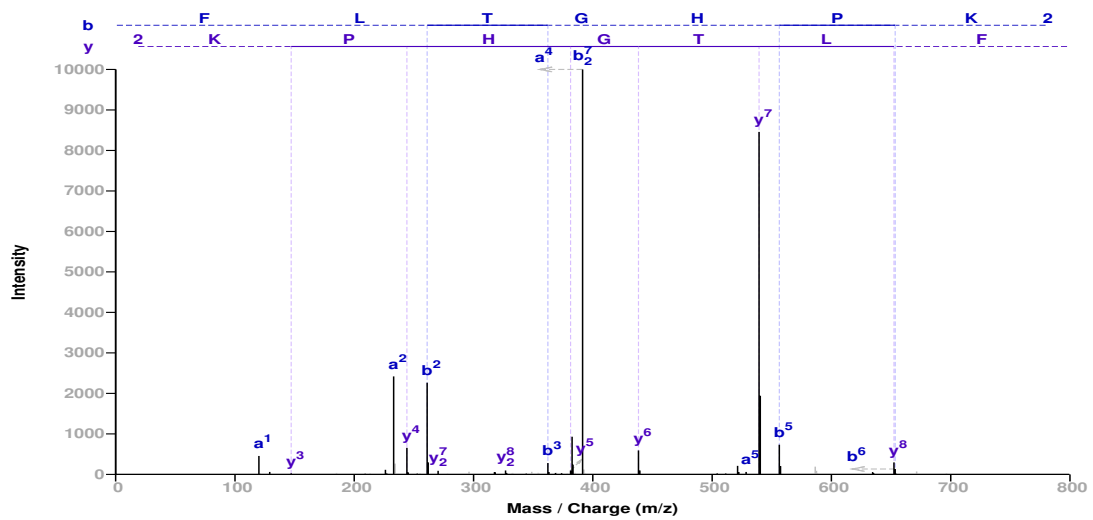



yeast1\_Scan\_Number\_6840 Precursor m/z: 614.314 cosine: 0.781  $\alpha$ : 0.239

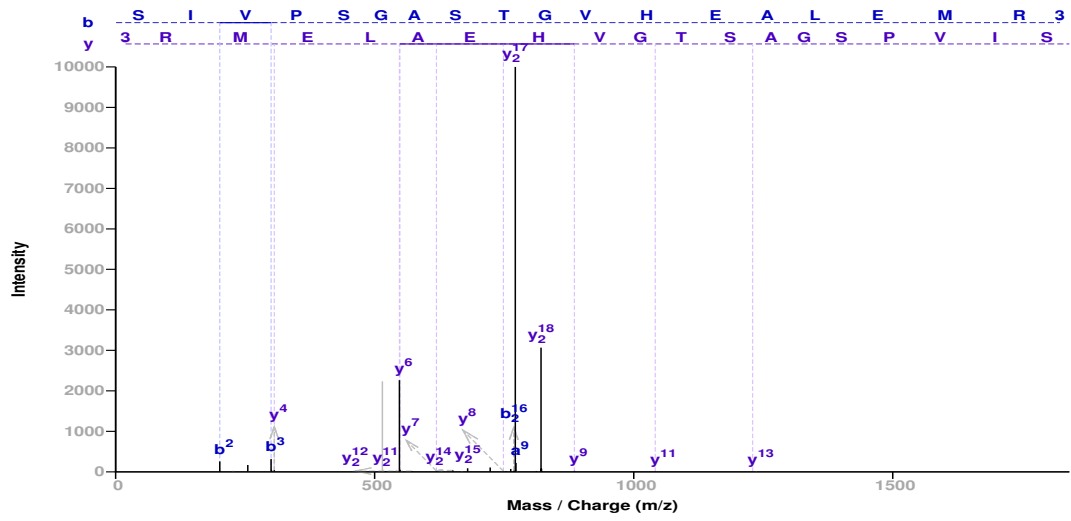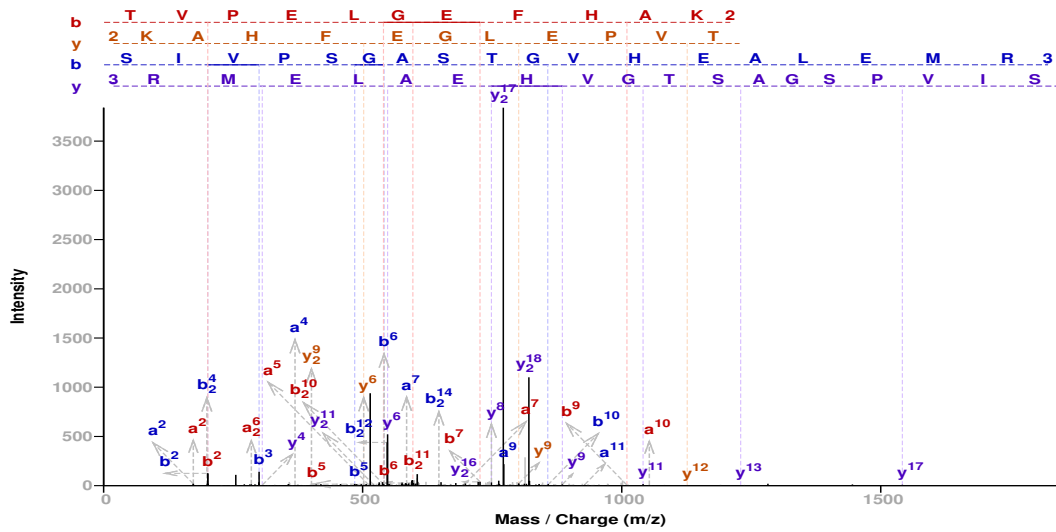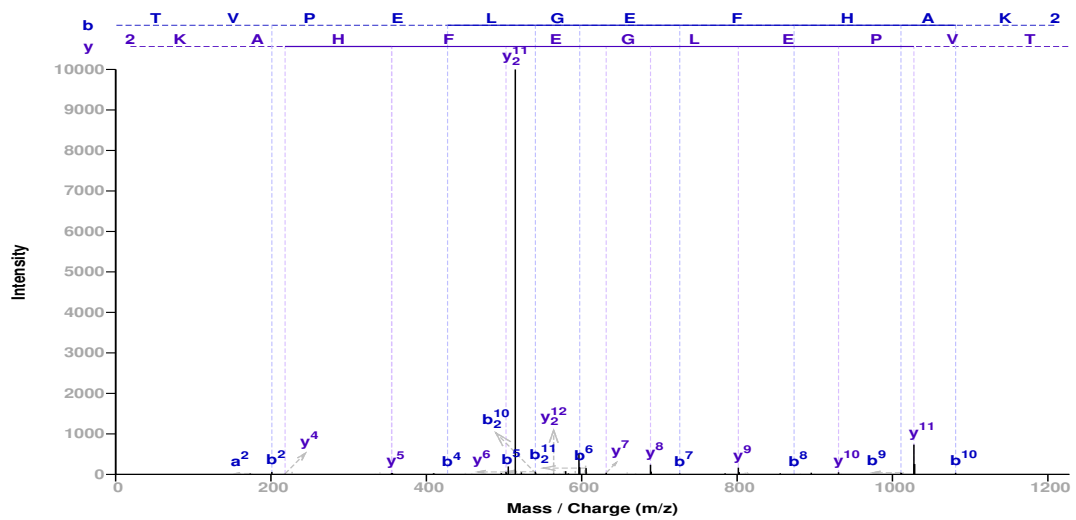

yeast1\_Scan\_Number\_2068 Precursor m/z: 451.223 cosine: 0.774  $\alpha$ : 0.238

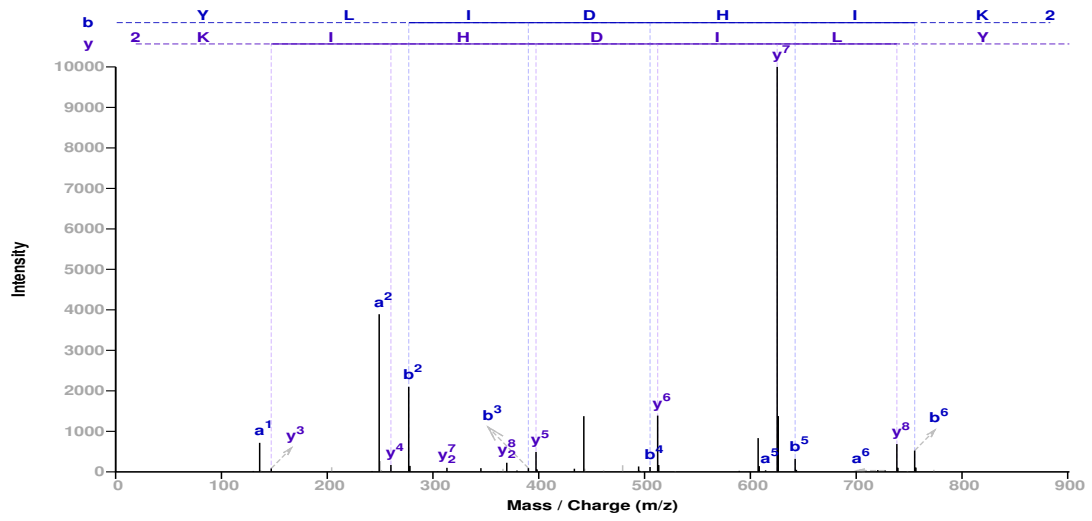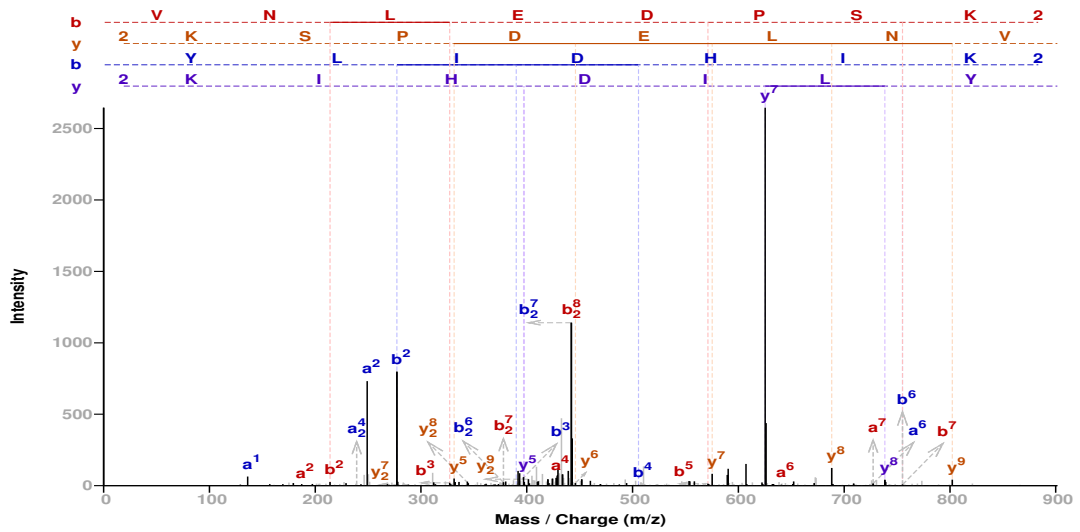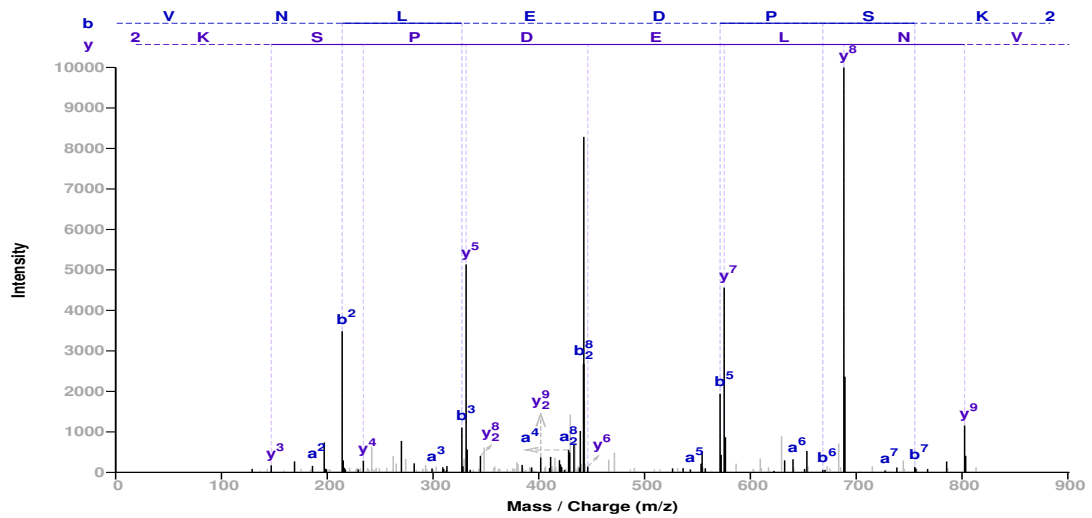





yeast1\_Scan\_Number\_4004 Precursor m/z: 457.252 cosine: 0.751  $\alpha$ : 0.221

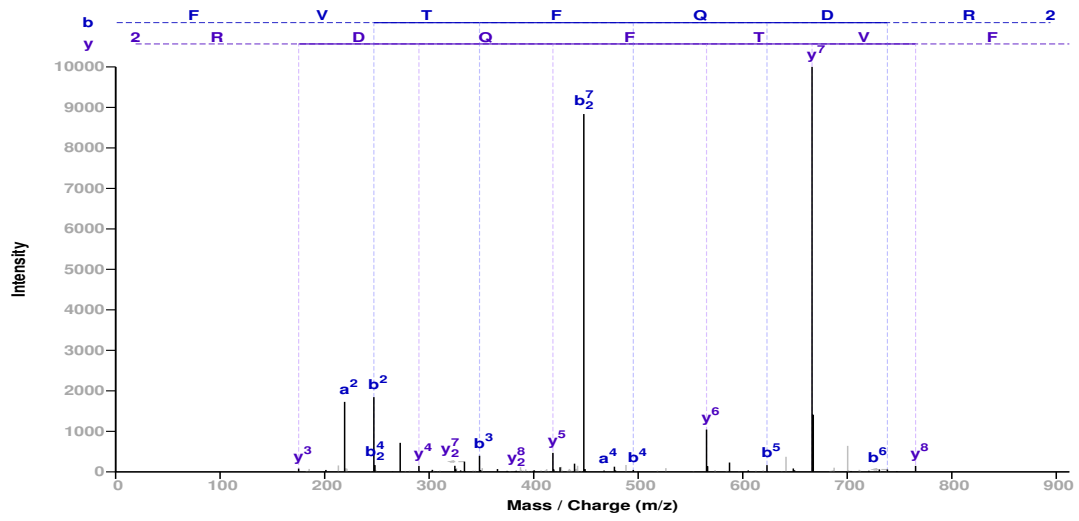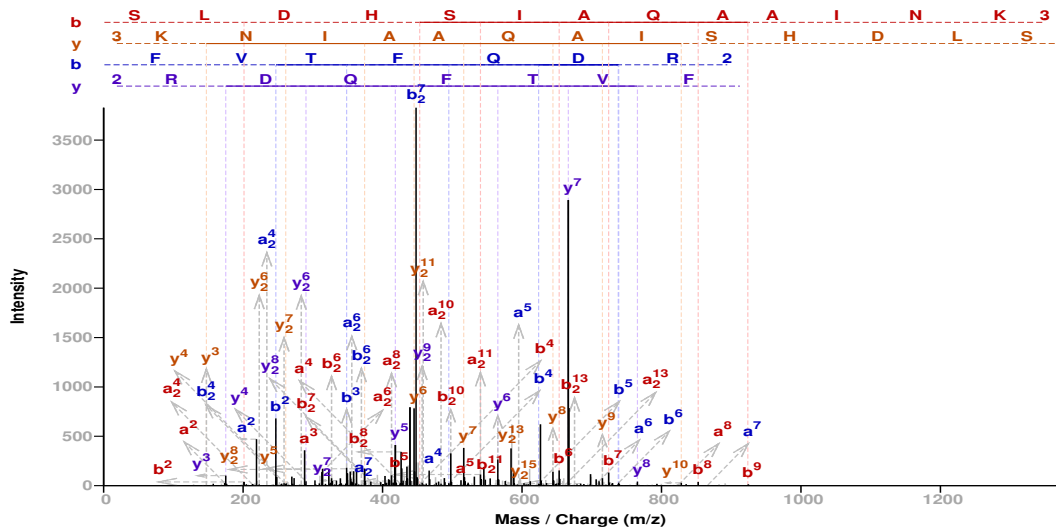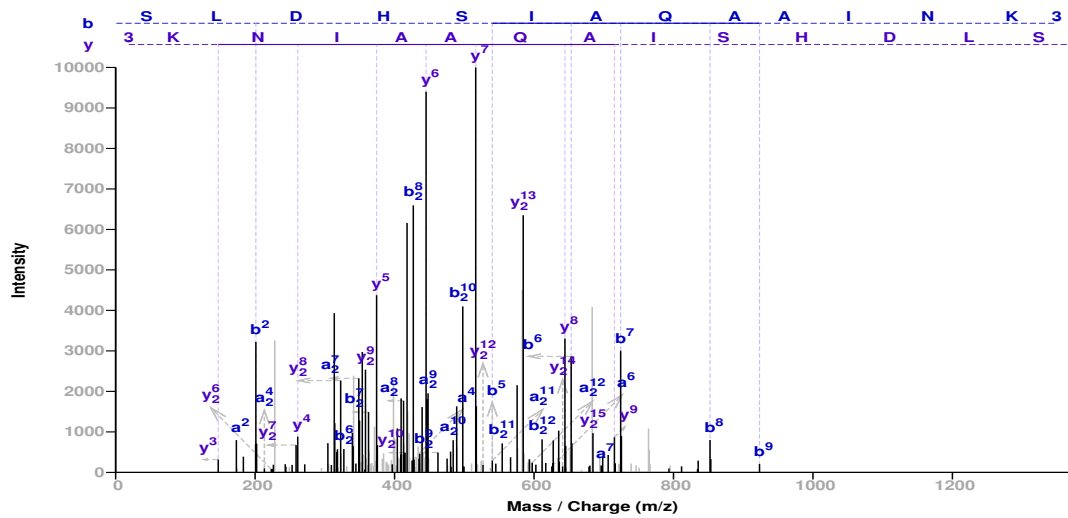

yeast1\_Scan\_Number\_4107 Precursor m/z: 432.735 cosine: 0.890  $\alpha$ : 0.220

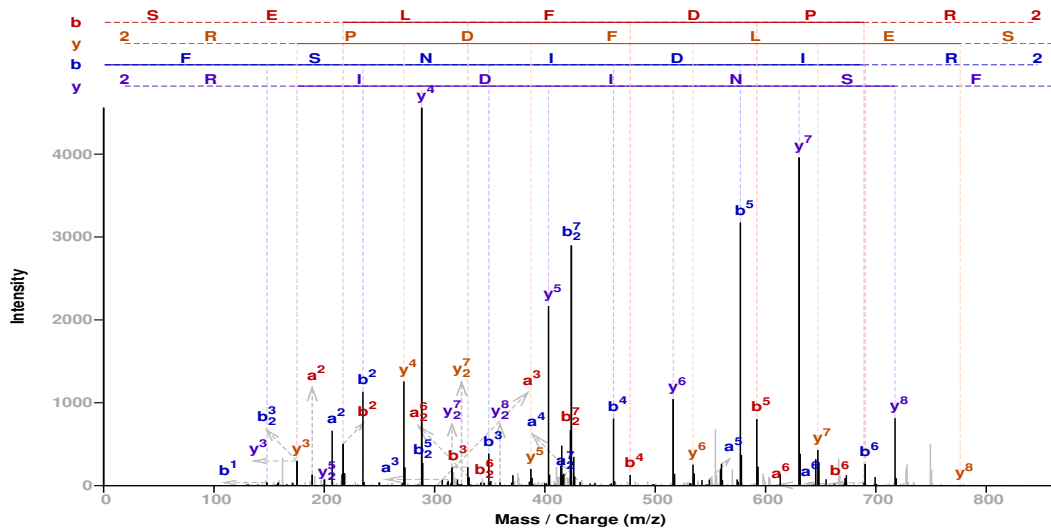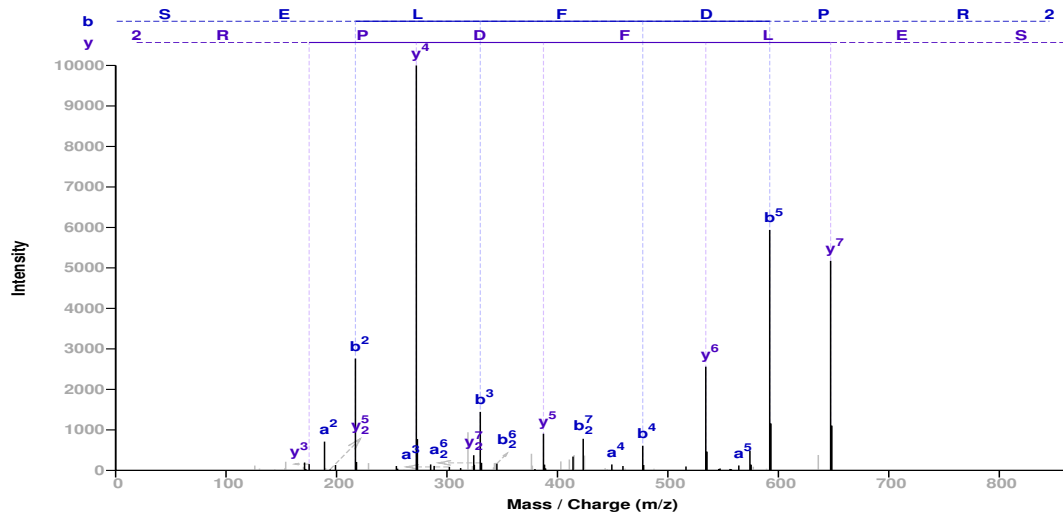

yeast1\_Scan\_Number\_6573 Precursor m/z: 667.361 cosine: 0.799  $\alpha$ : 0.216

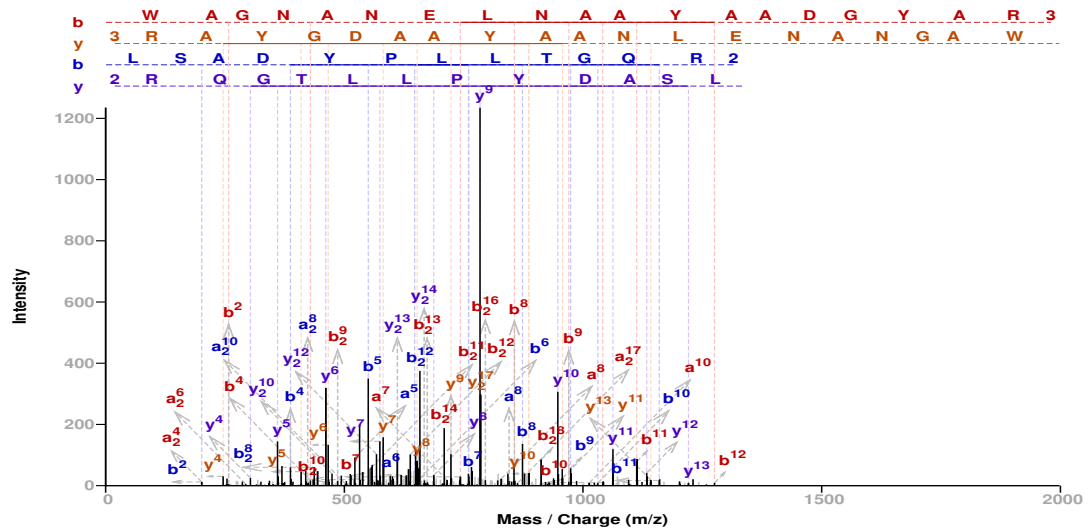

yeast1\_Scan\_Number\_2578 Precursor m/z: 452.226 cosine: 0.822  $\alpha$ : 0.215

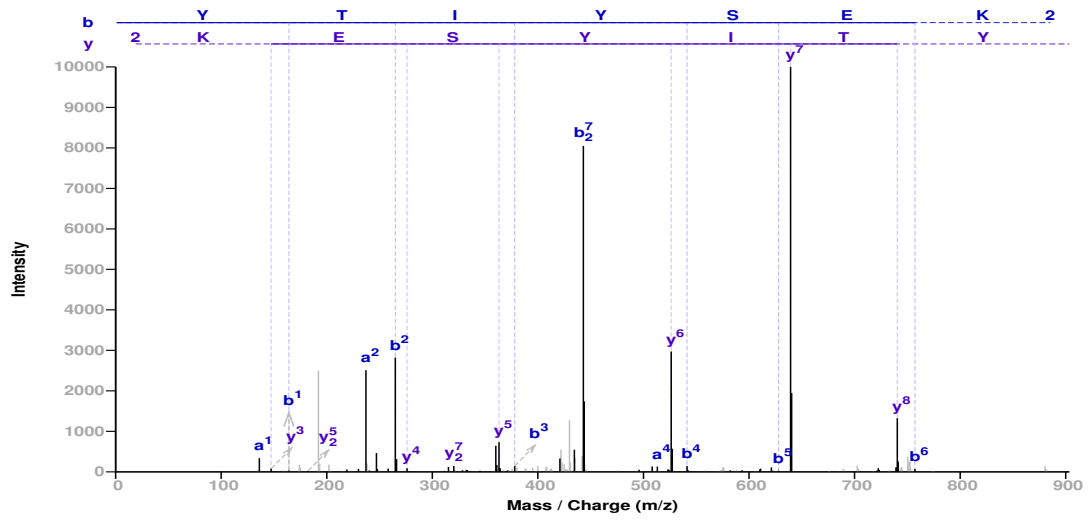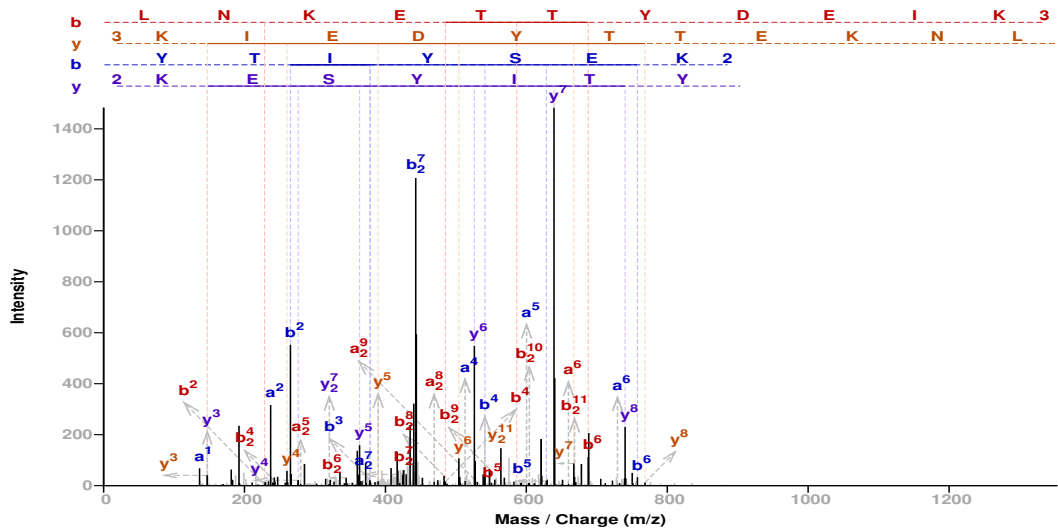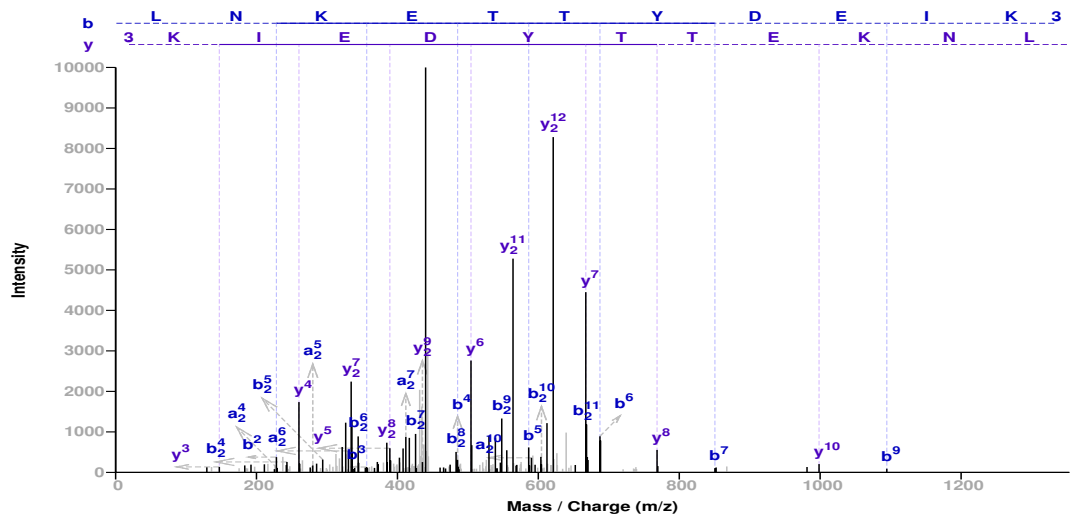

yeast1\_Scan\_Number\_3969 Precursor m/z: 444.762 cosine: 0.919  $\alpha$ : 0.214

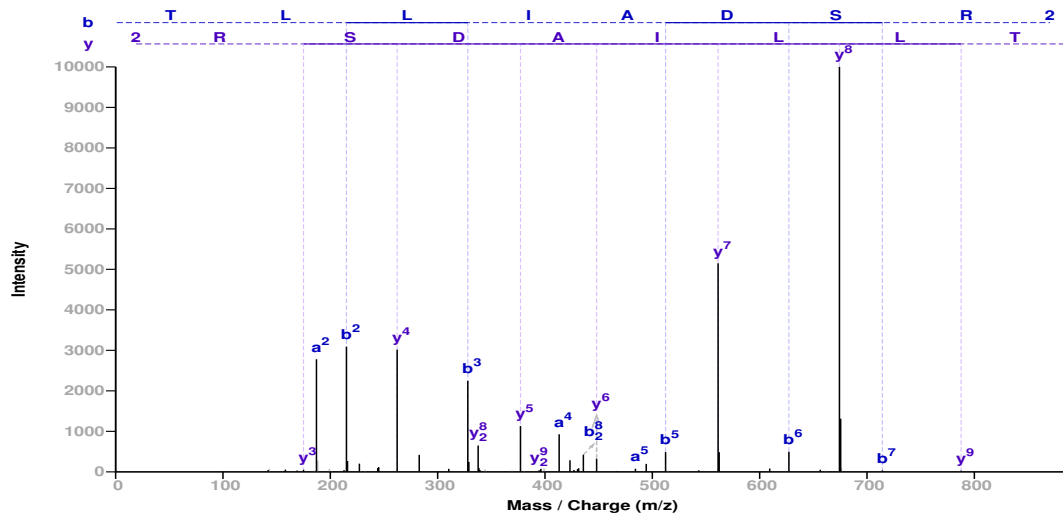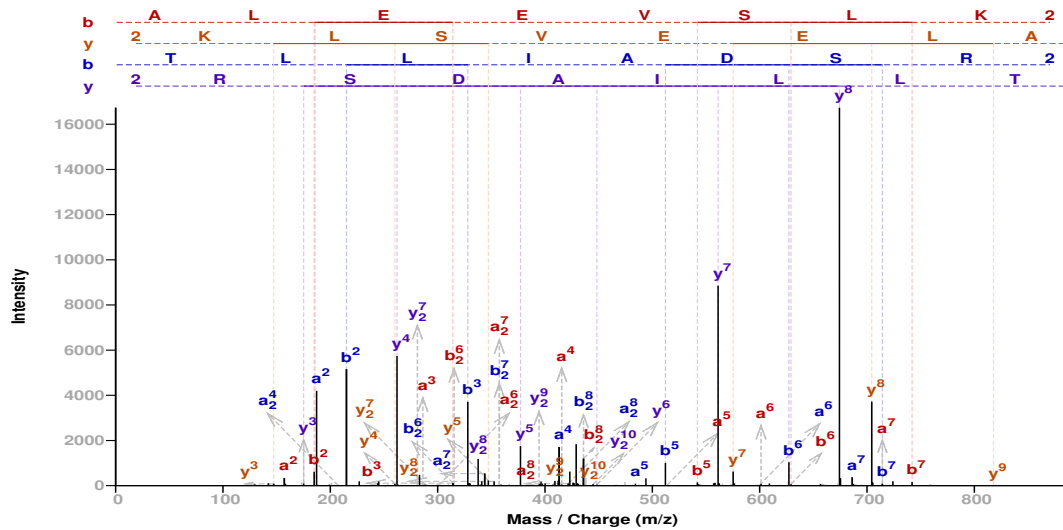

yeast1\_Scan\_Number\_3260 Precursor m/z: 511.916 cosine: 0.792  $\alpha$ : 0.208

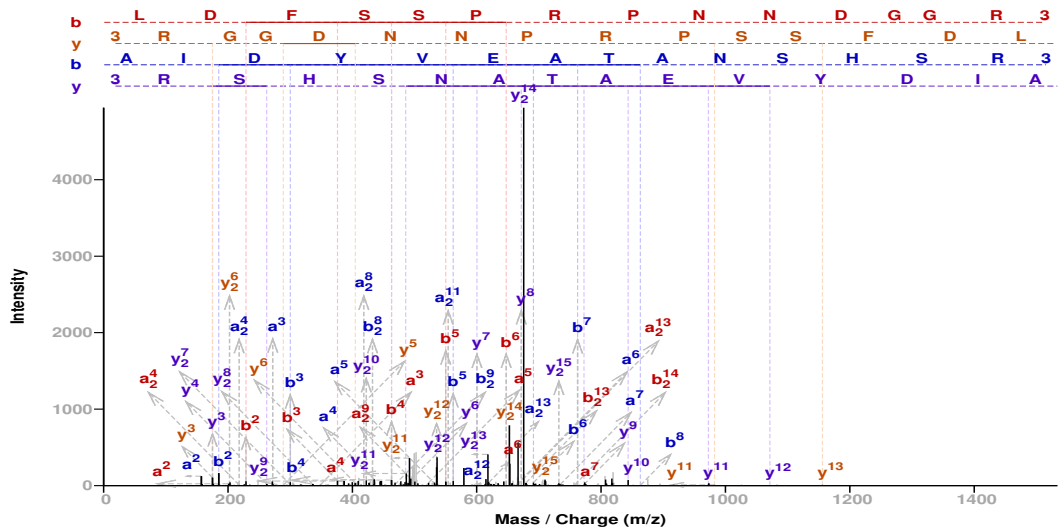

yeast1\_Scan\_Number\_1785 Precursor m/z: 412.561 cosine: 0.775  $\alpha$ : 0.205

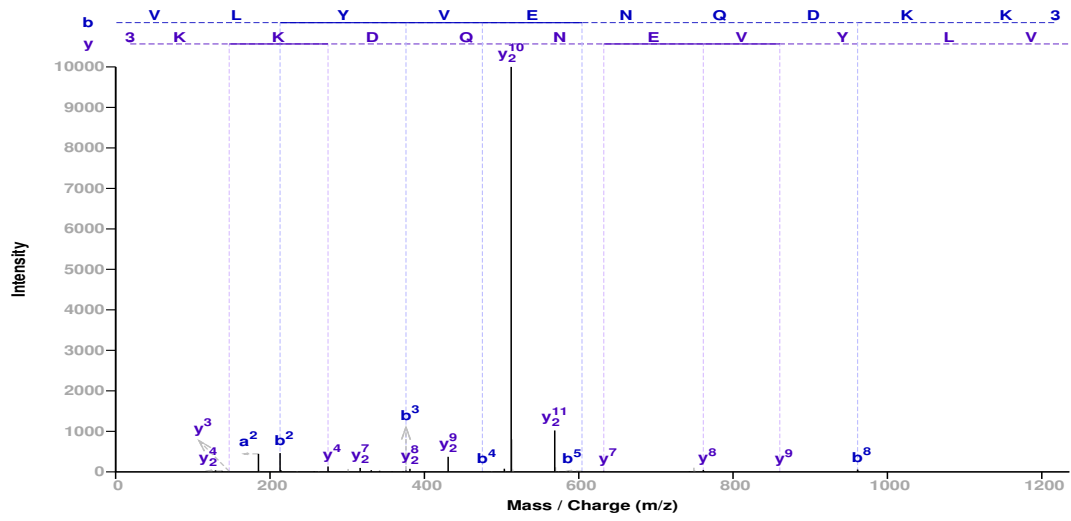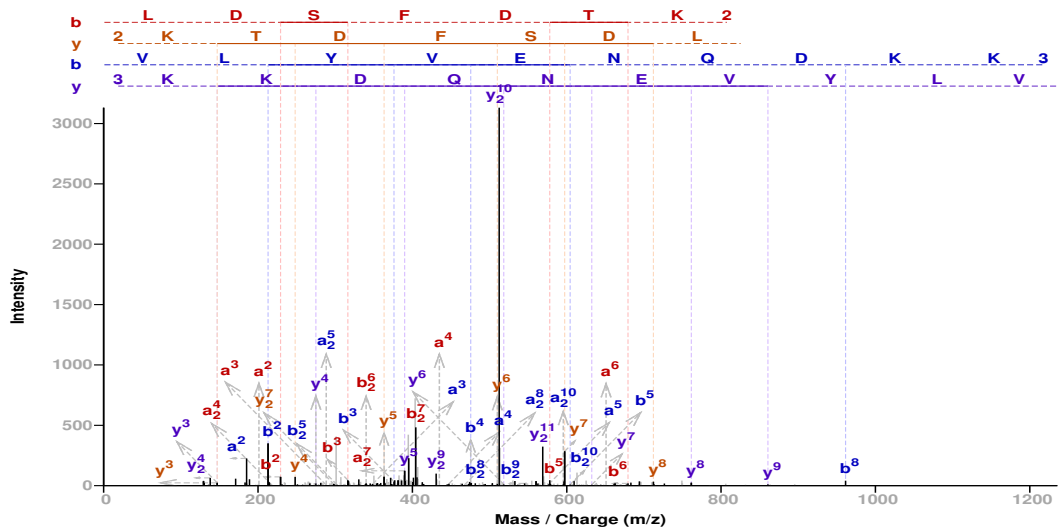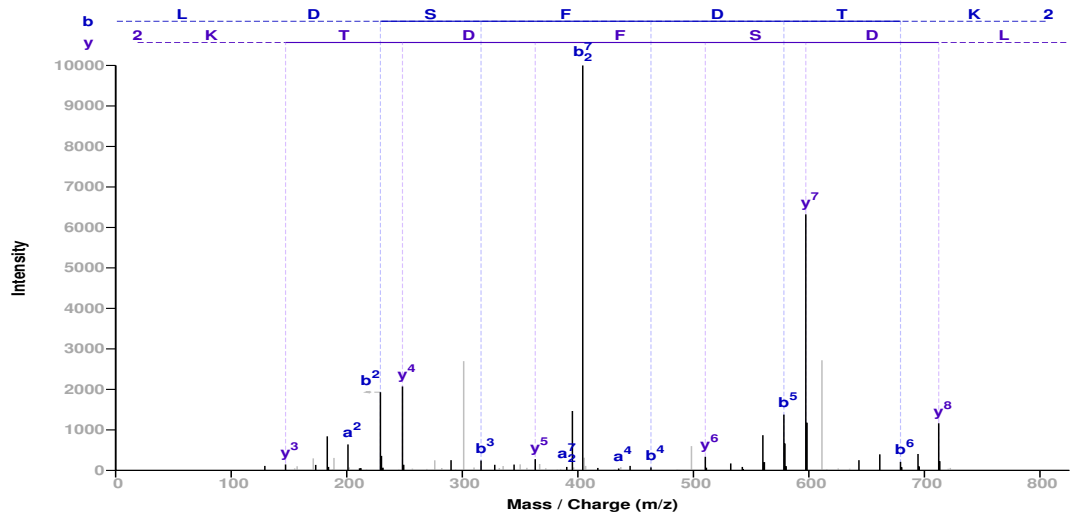



yeast1\_Scan\_Number\_3549 Precursor m/z: 479.255 cosine: 0.875  $\alpha$ : 0.204

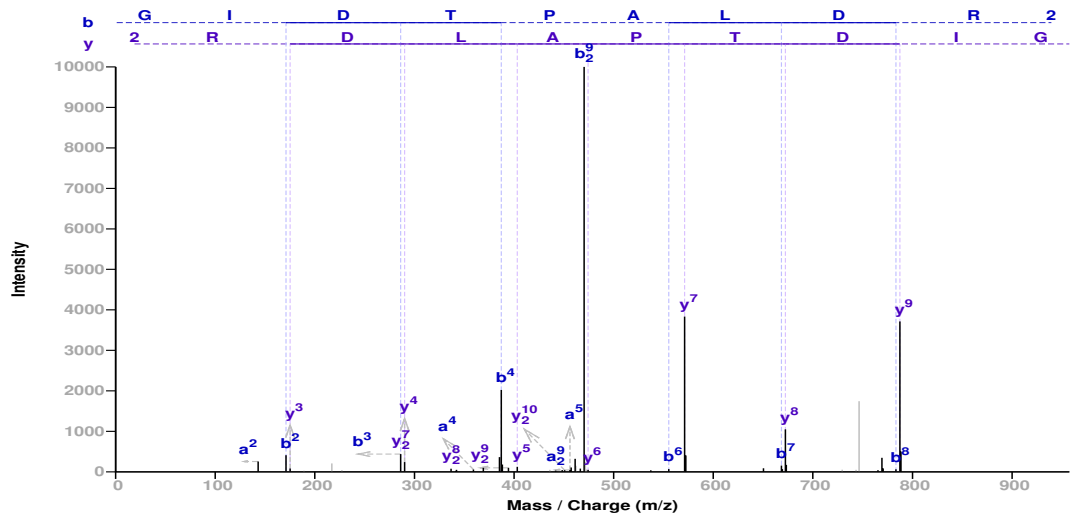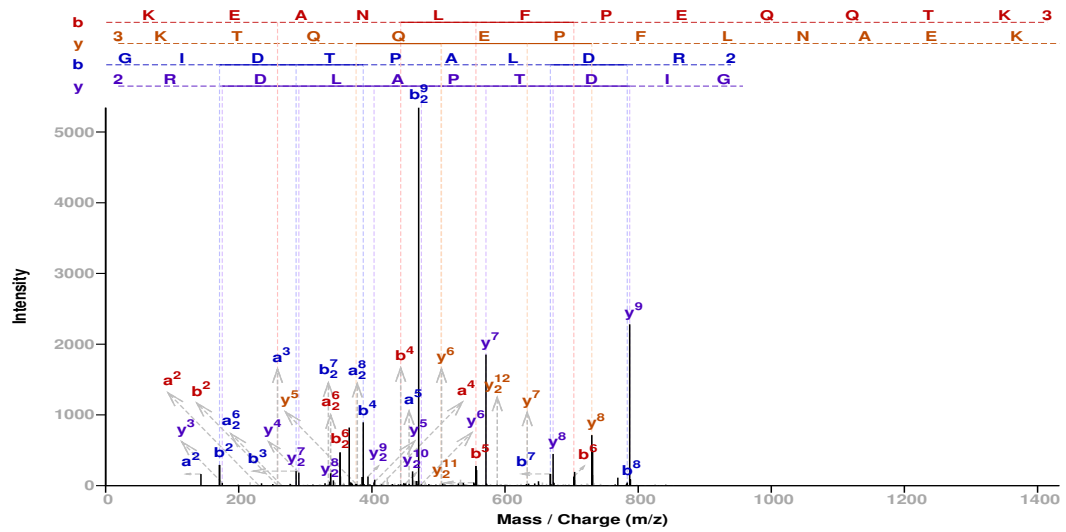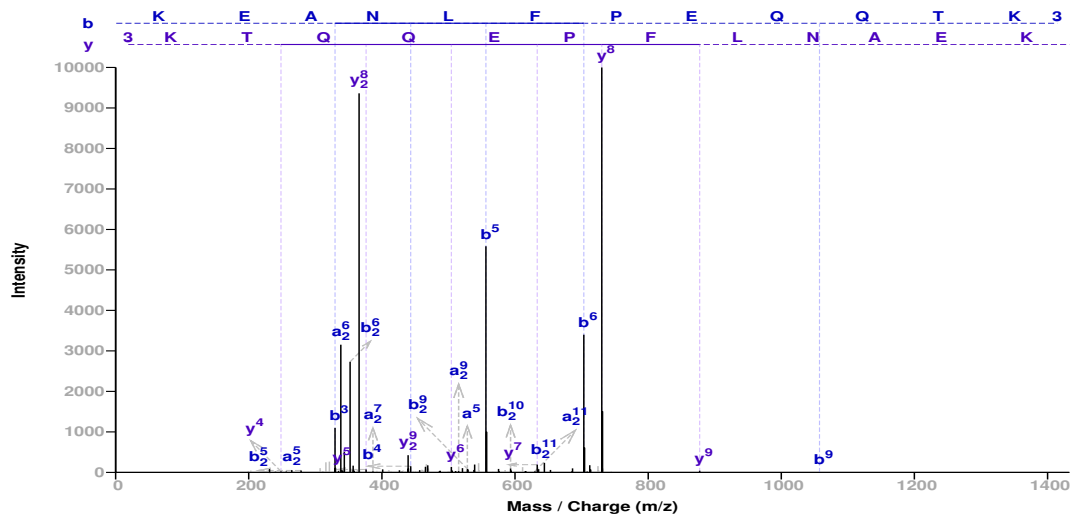

yeast1\_Scan\_Number\_5690 Precursor m/z: 534.316 cosine: 0.786  $\alpha$ : 0.199

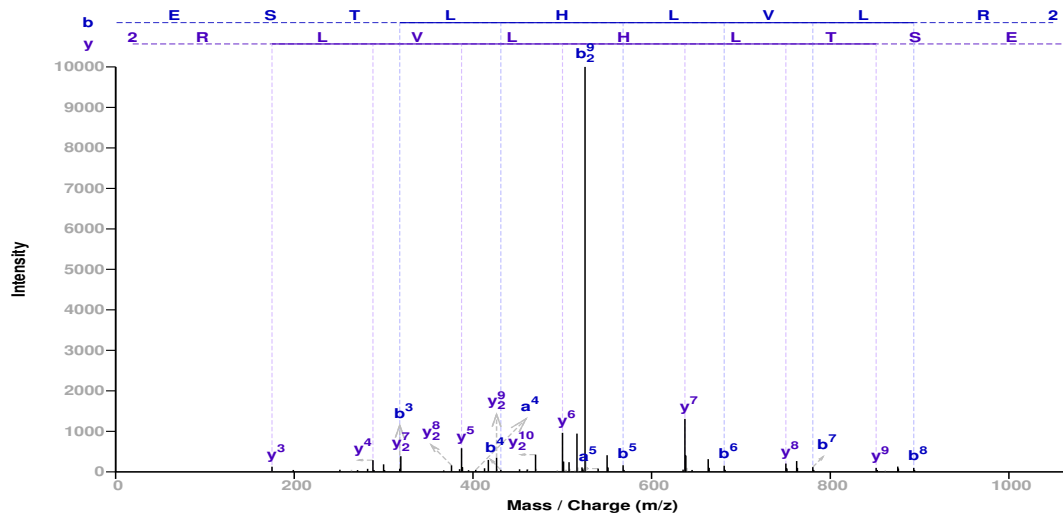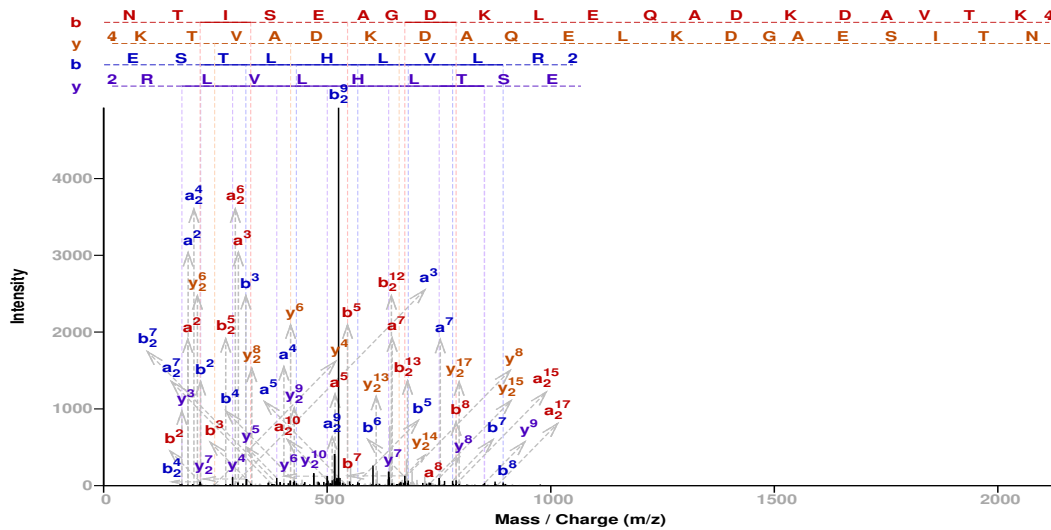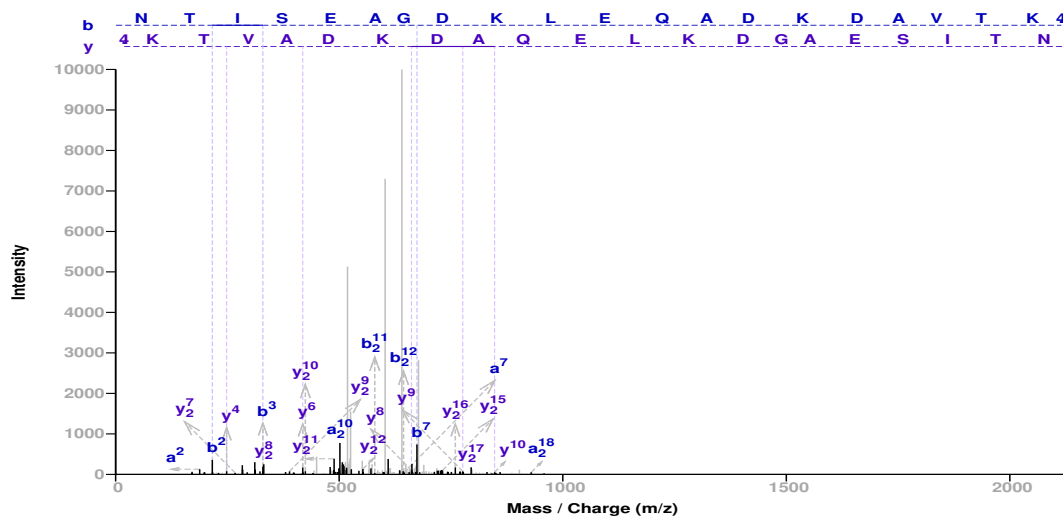



yeast1\_Scan\_Number\_2679 Precursor m/z: 485.243 cosine: 0.794  $\alpha$ : 0.196

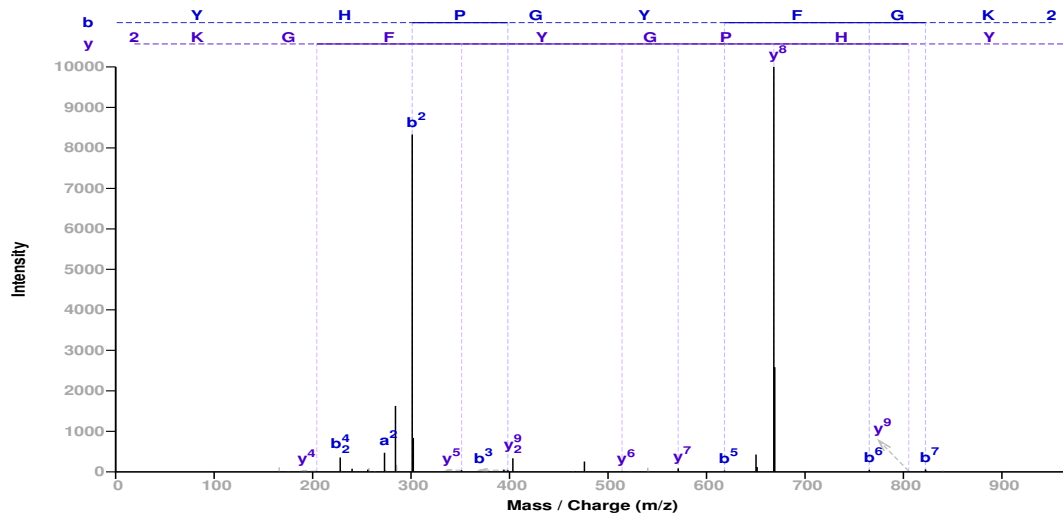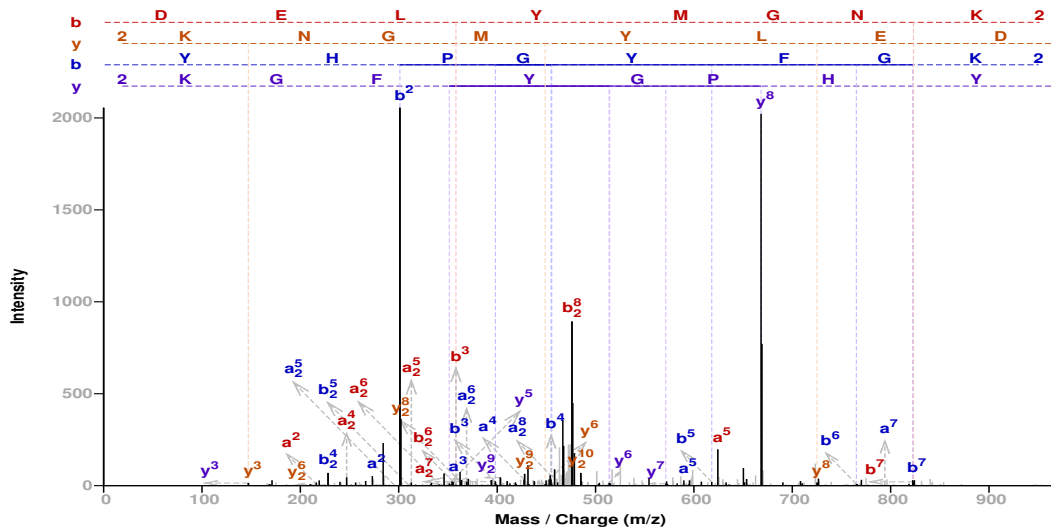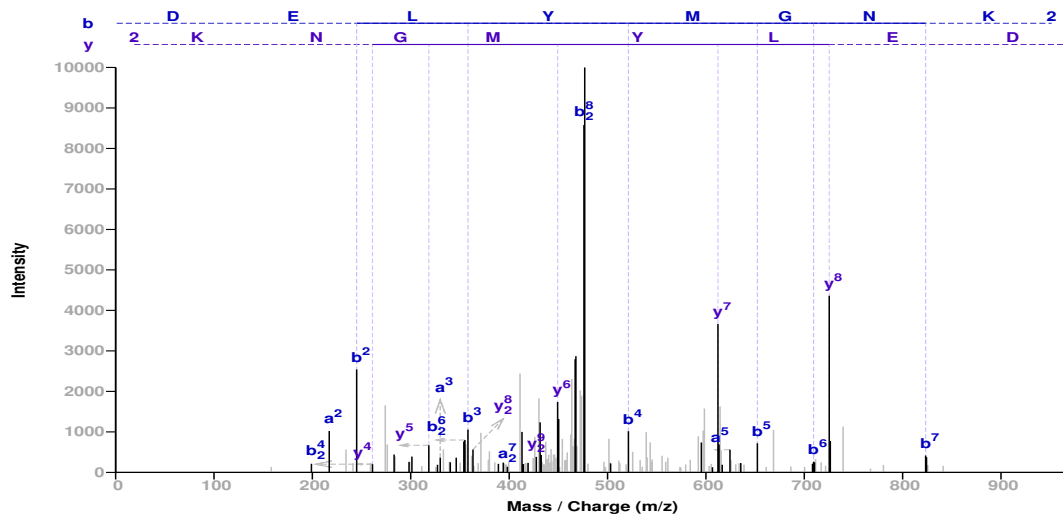

yeast1\_Scan\_Number\_5750 Precursor m/z: 411.244 cosine: 0.808  $\alpha$ : 0.193

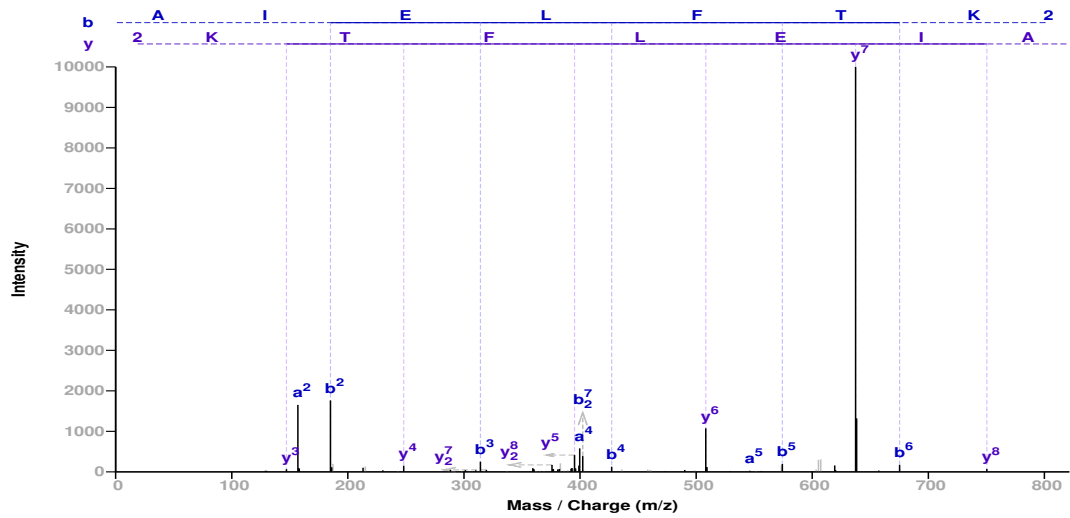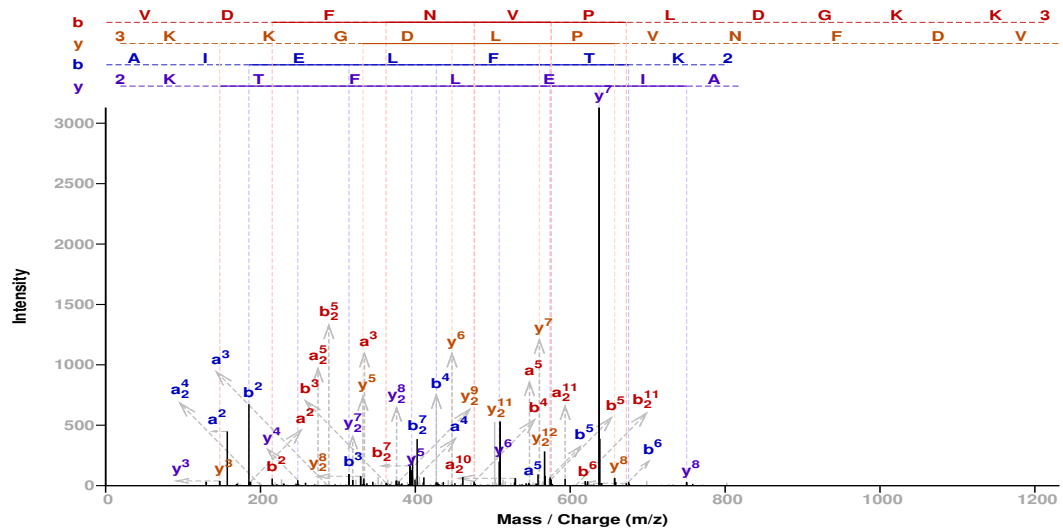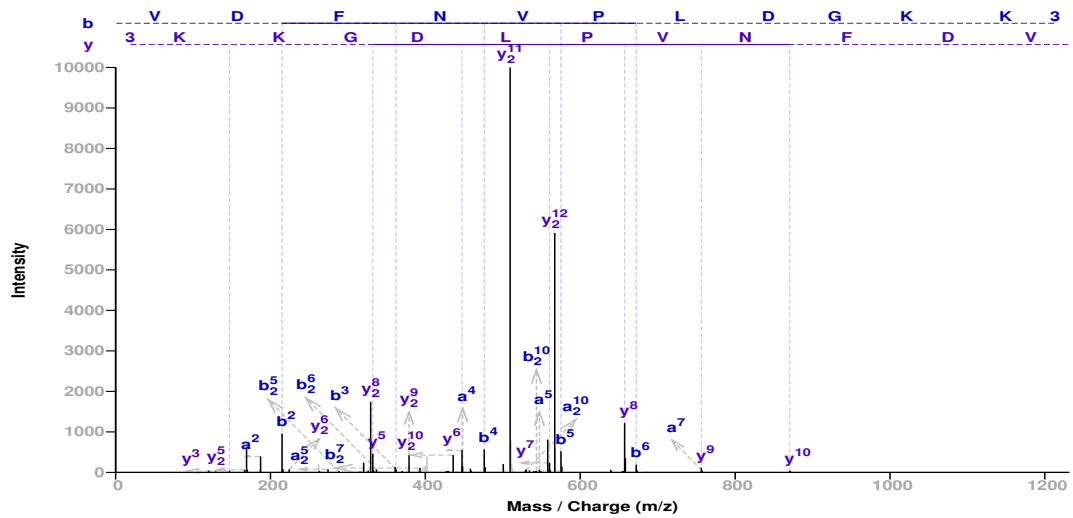

yeast1\_Scan\_Number\_2505 Precursor m/z: 636.826 cosine: 0.781  $\alpha$ : 0.190

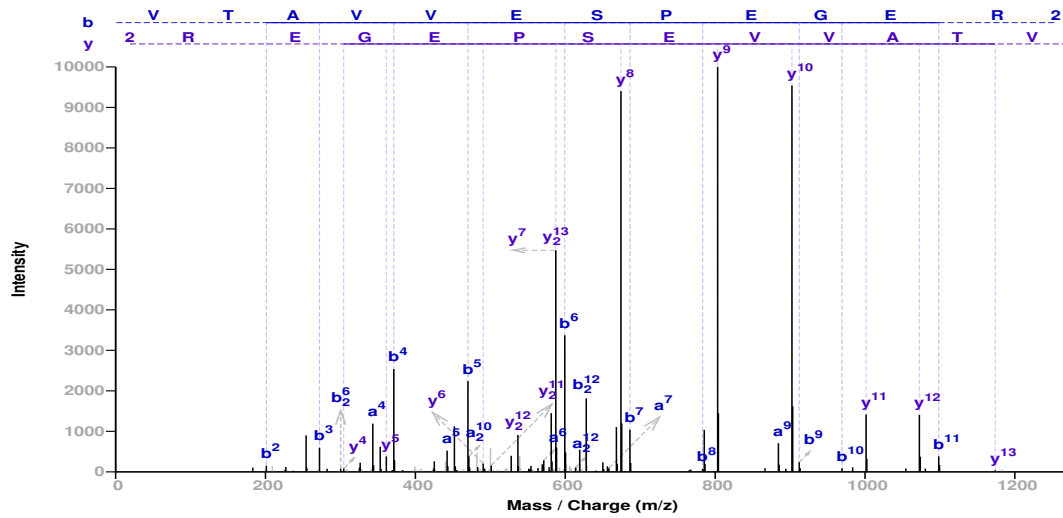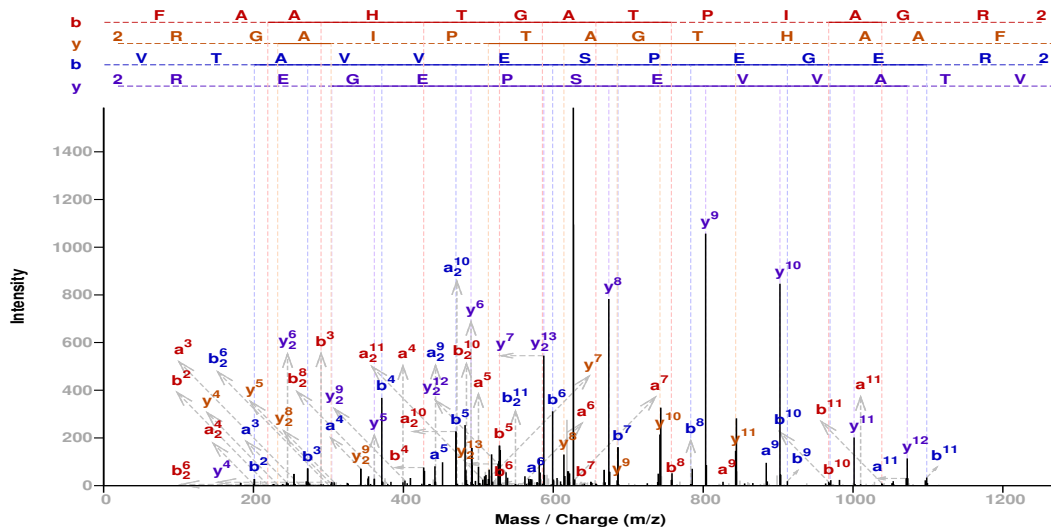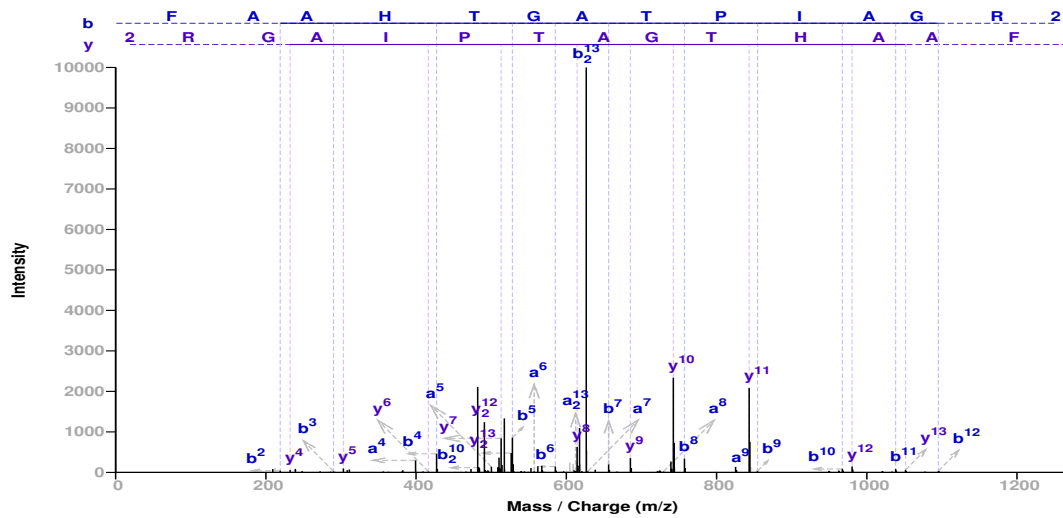

yeast1\_Scan\_Number\_2822 Precursor m/z: 355.866 cosine: 0.887  $\alpha$ : 0.182

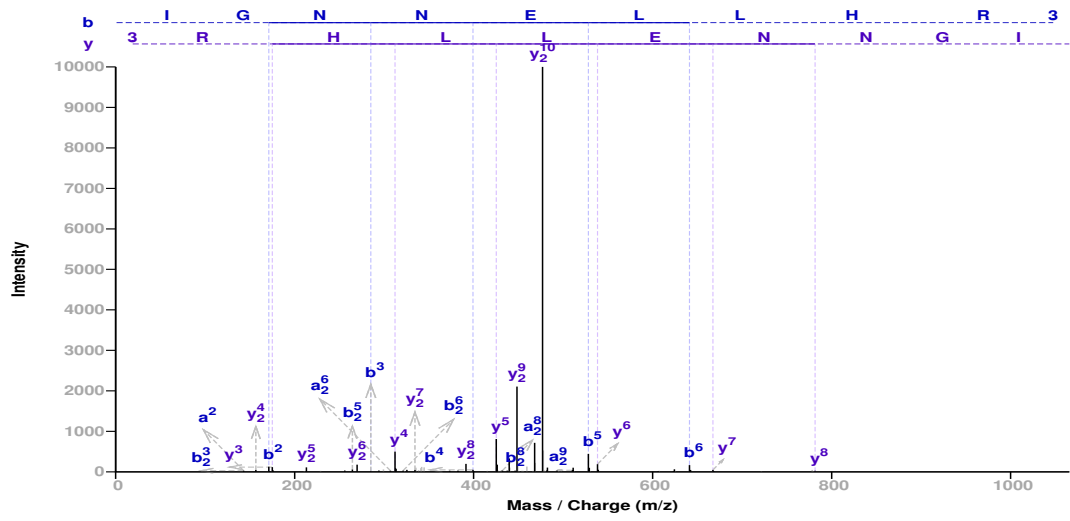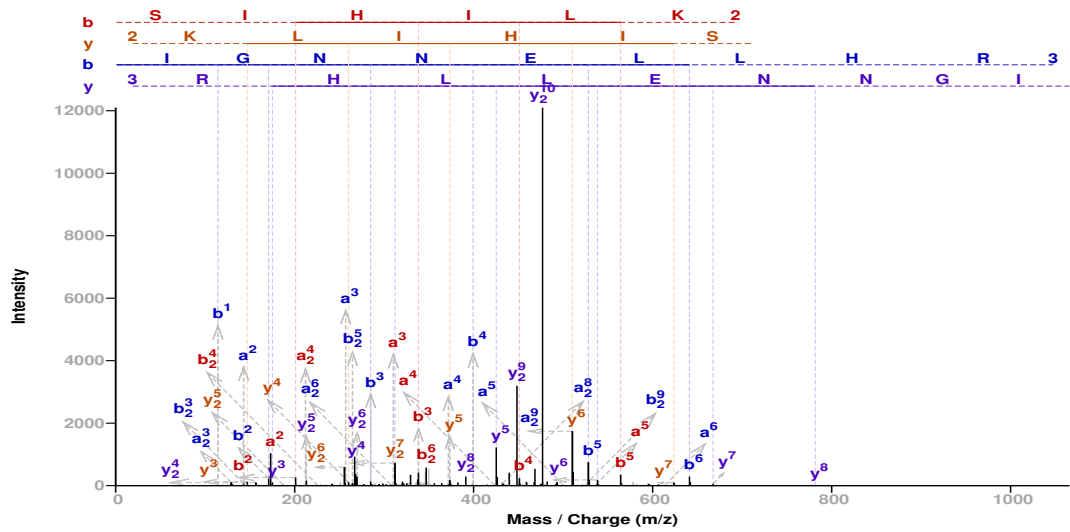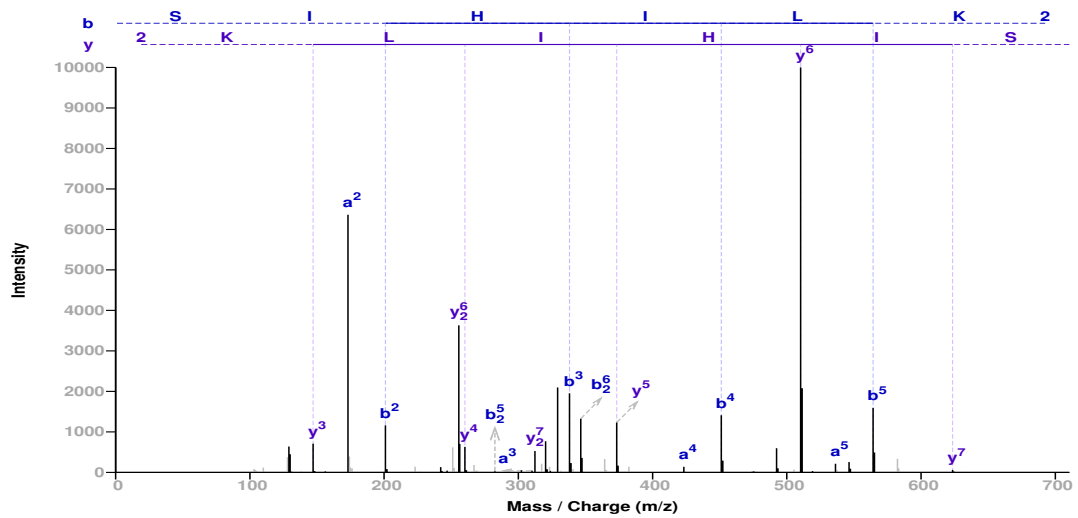

yeast1\_Scan\_Number\_1880 Precursor m/z: 556.259 cosine: 0.830  $\alpha$ : 0.182

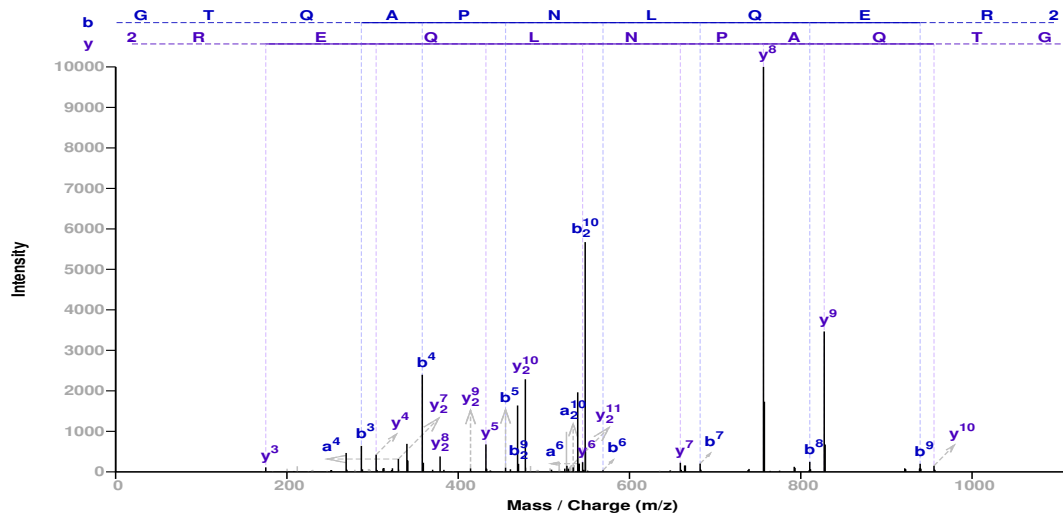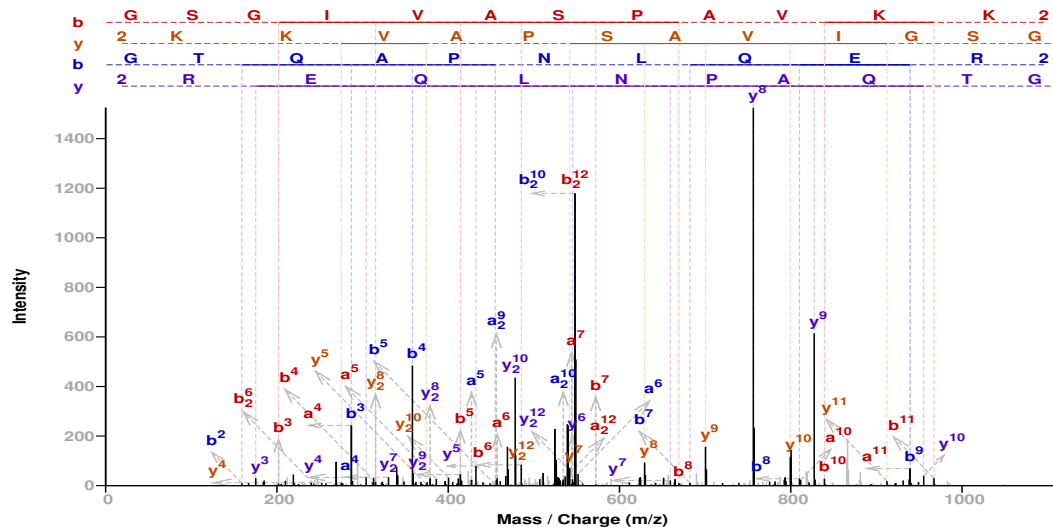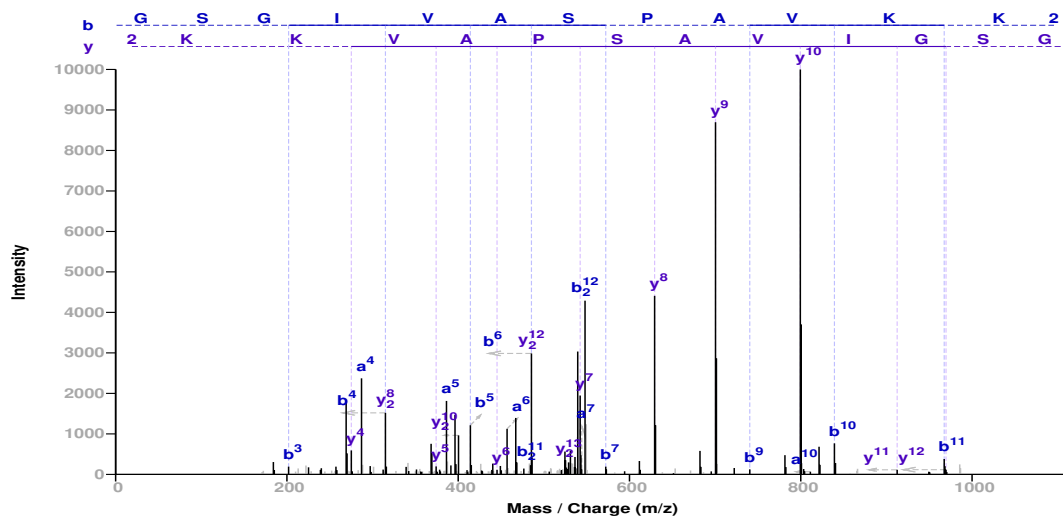



yeast1\_Scan\_Number\_7640 Precursor m/z: 633.872 cosine: 0.838  $\alpha$ : 0.179

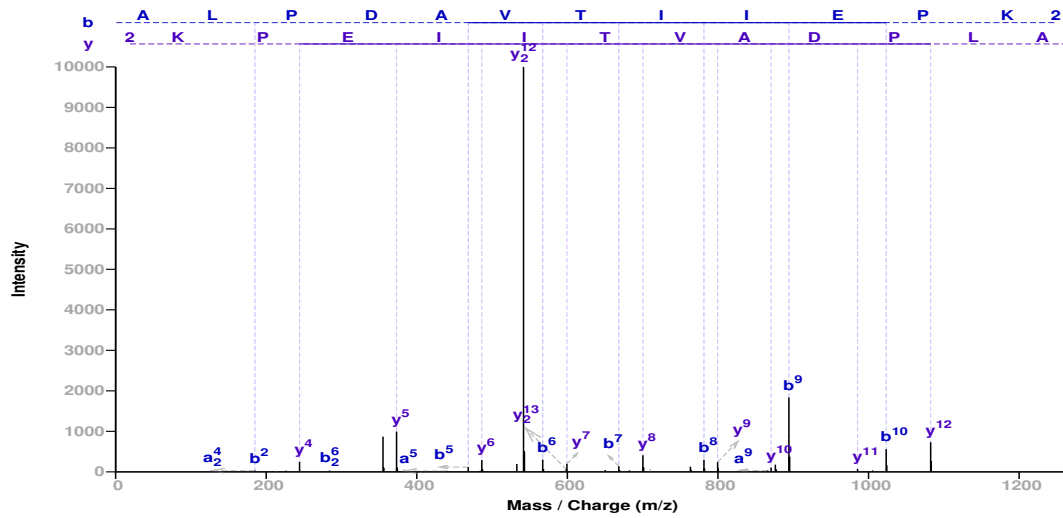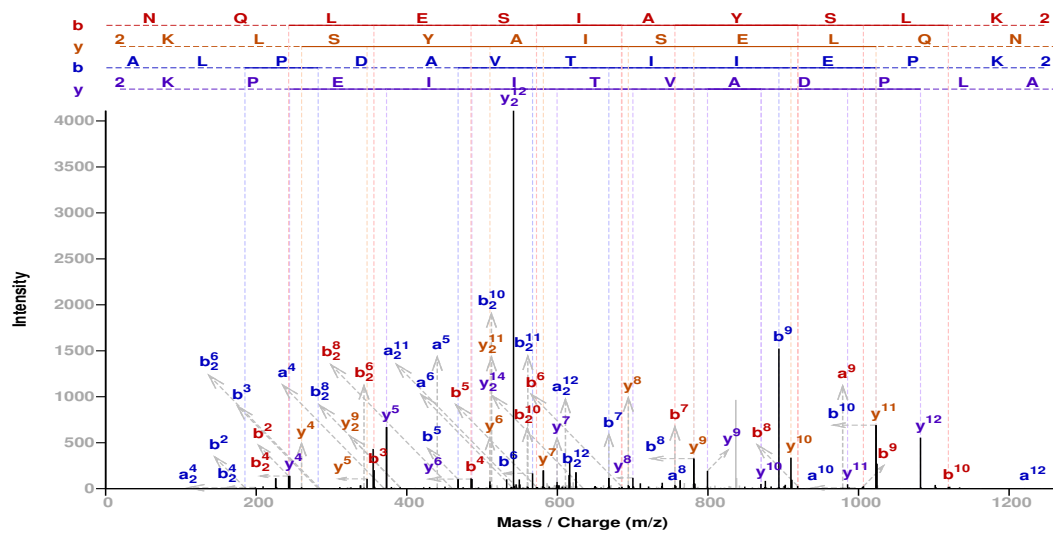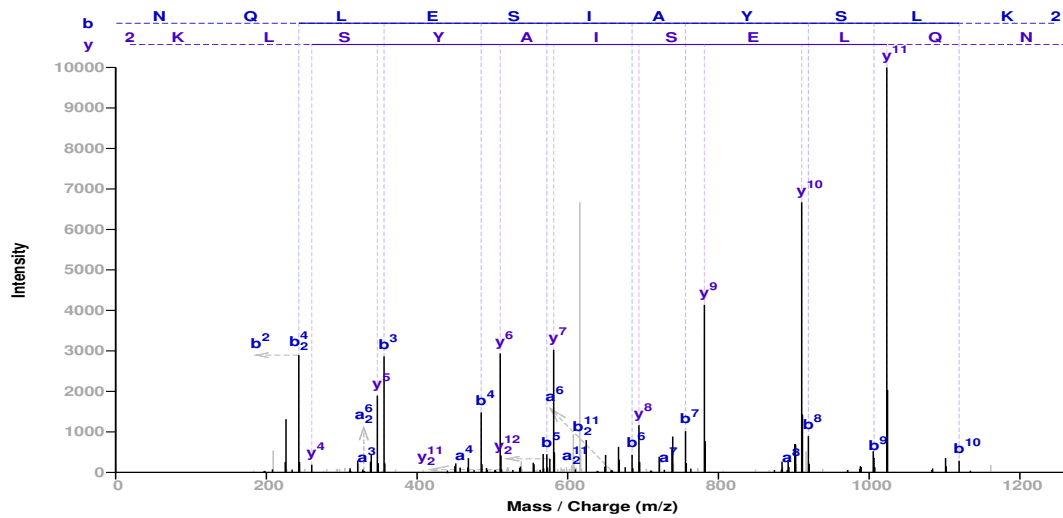

yeast1\_Scan\_Number\_4583 Precursor m/z: 501.780 cosine: 0.894  $\alpha$ : 0.177

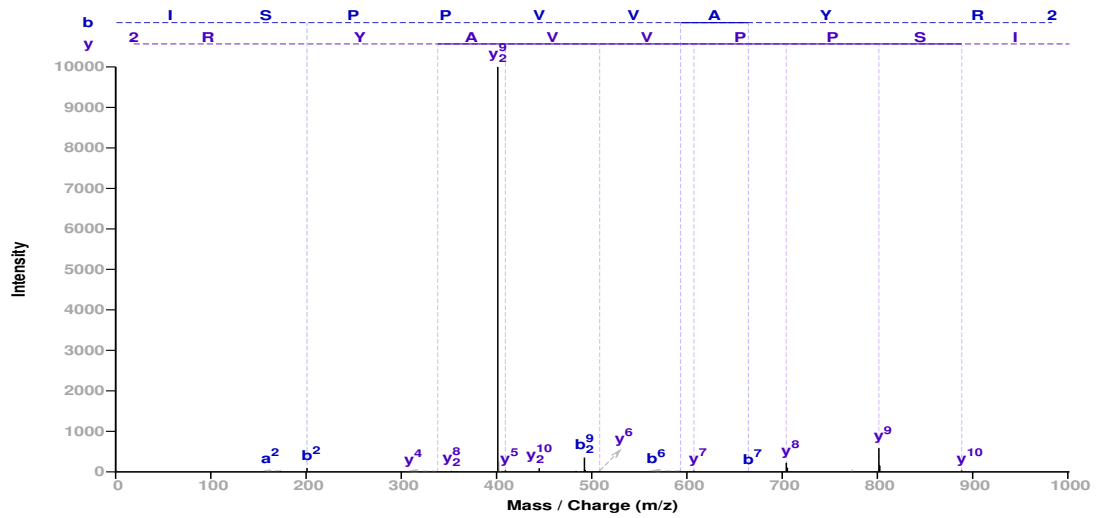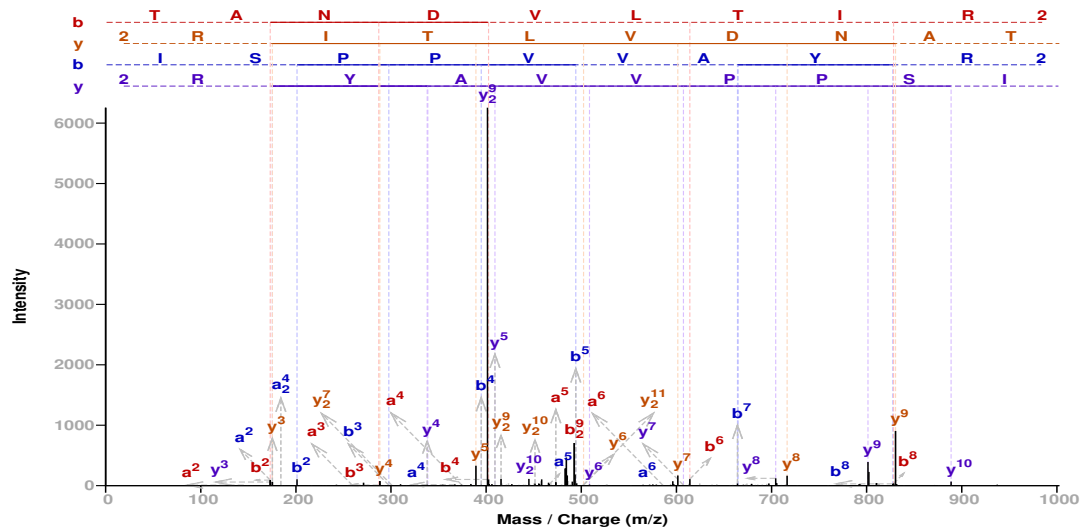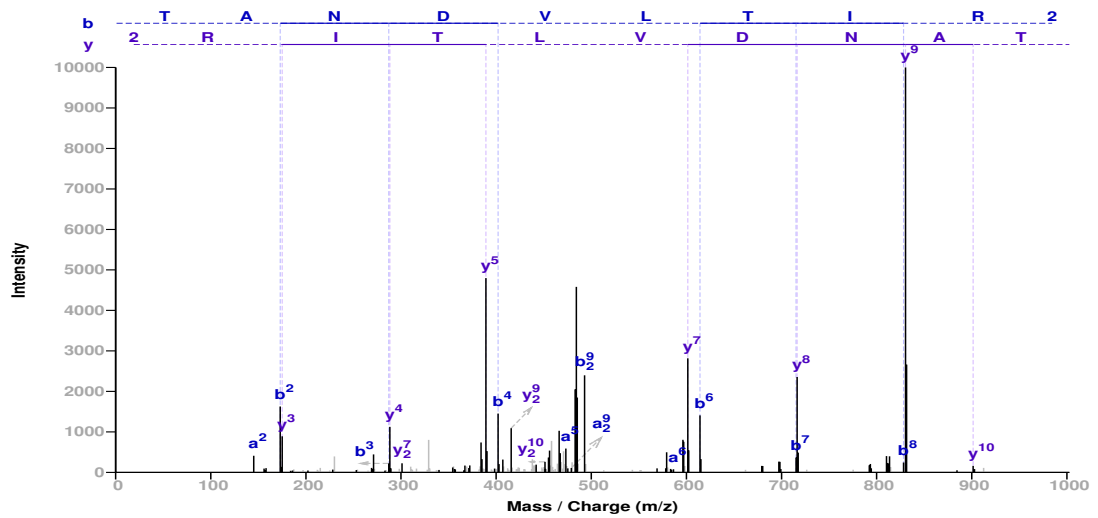

yeast1\_Scan\_Number\_4743 Precursor m/z: 425.218 cosine: 0.910  $\alpha$ : 0.173

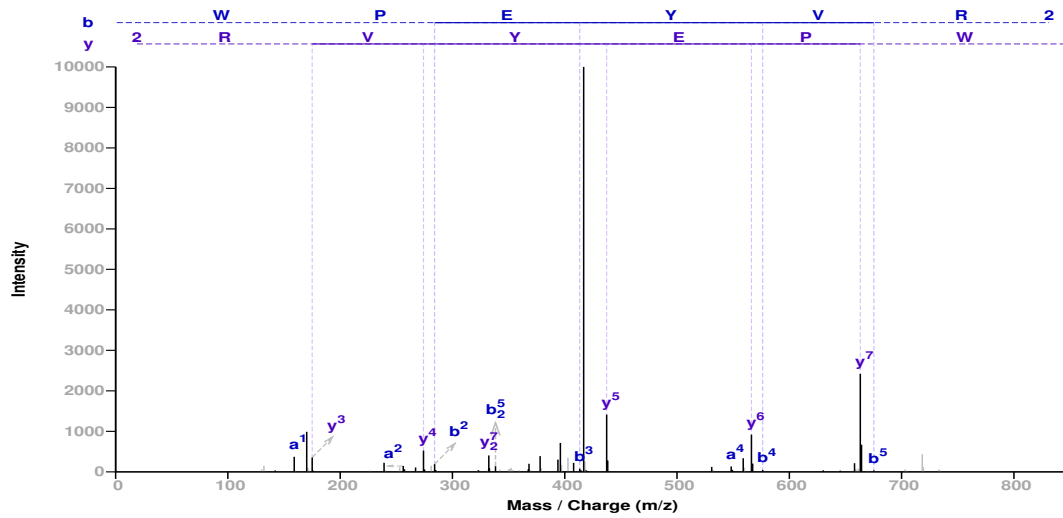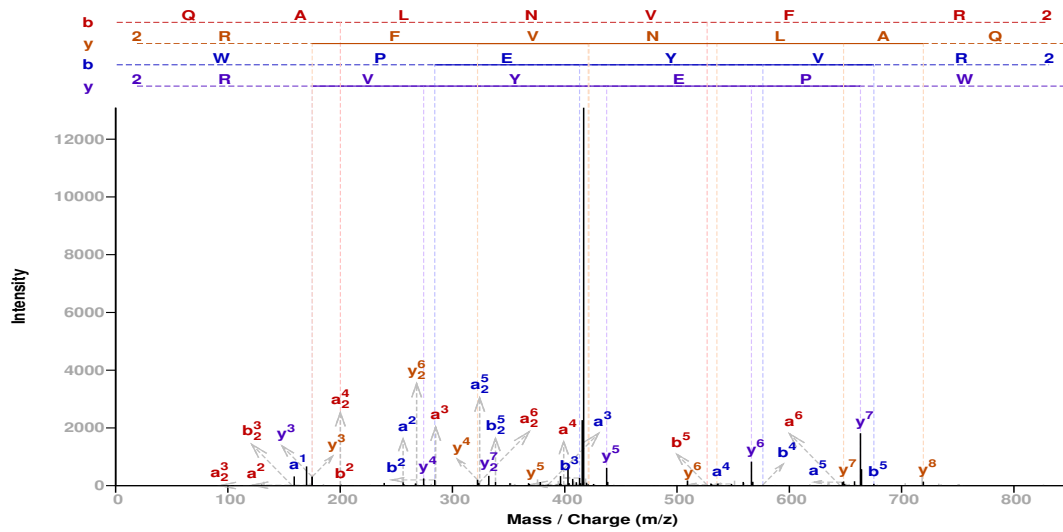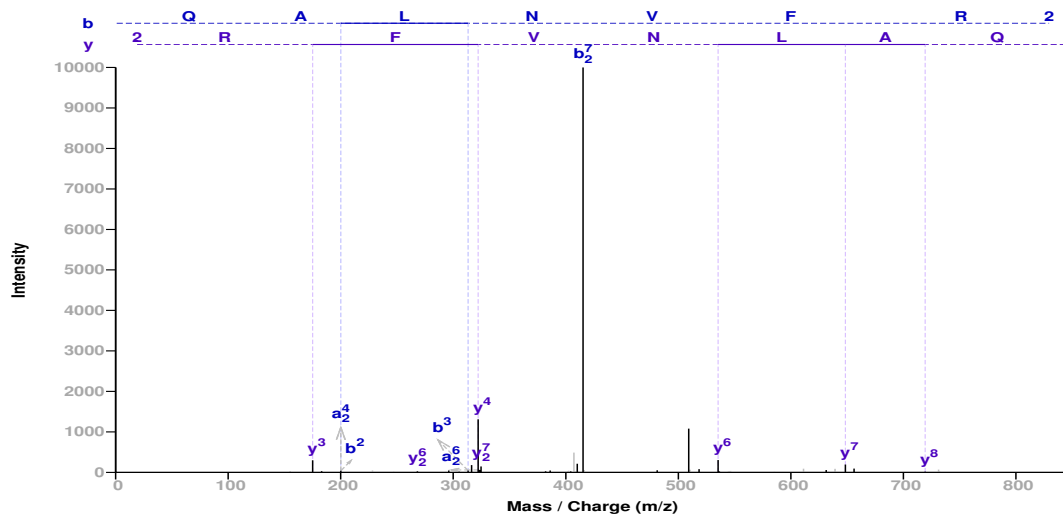



yeast1\_Scan\_Number\_886 Precursor m/z: 443.276 cosine: 0.812  $\alpha$ : 0.157

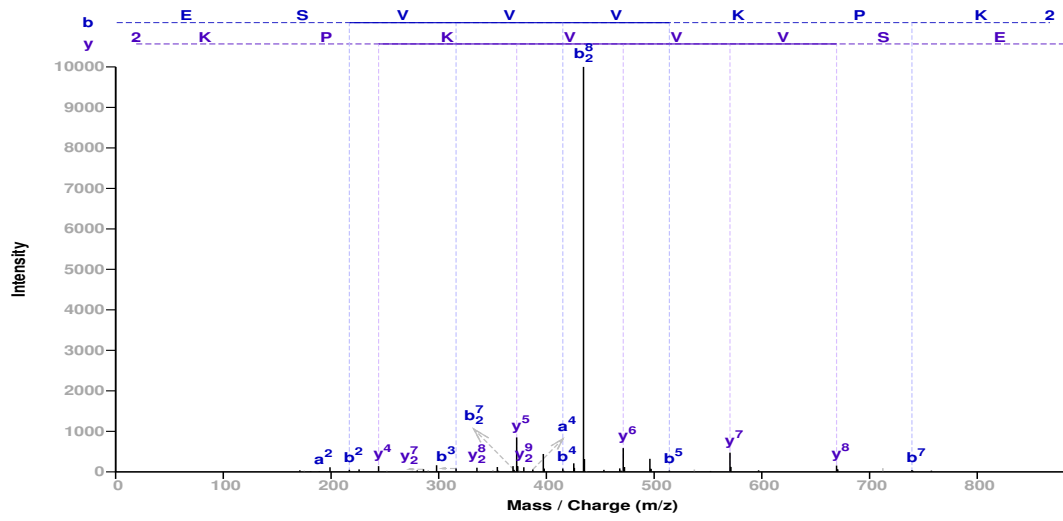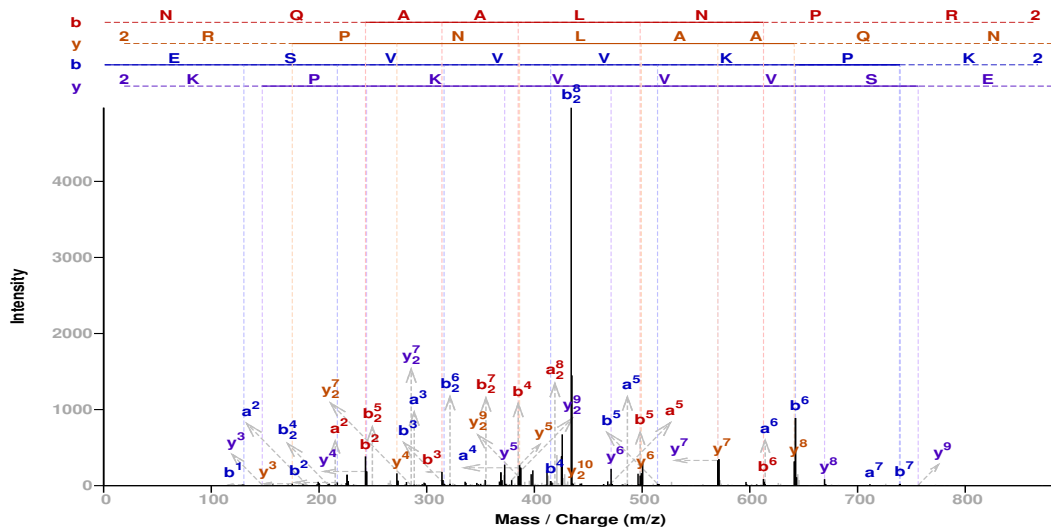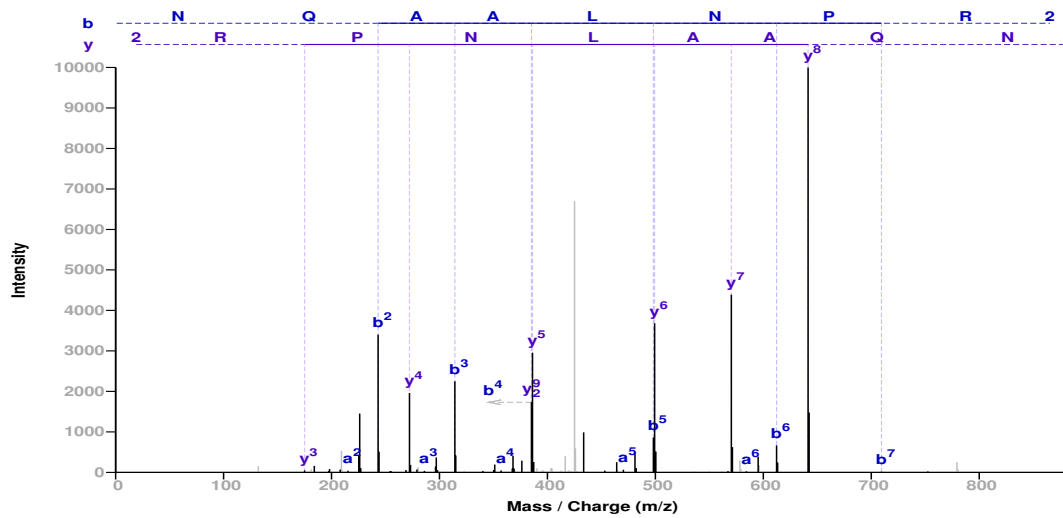

yeast1\_Scan\_Number\_4143 Precursor m/z: 370.218 cosine: 0.885  $\alpha$ : 0.155

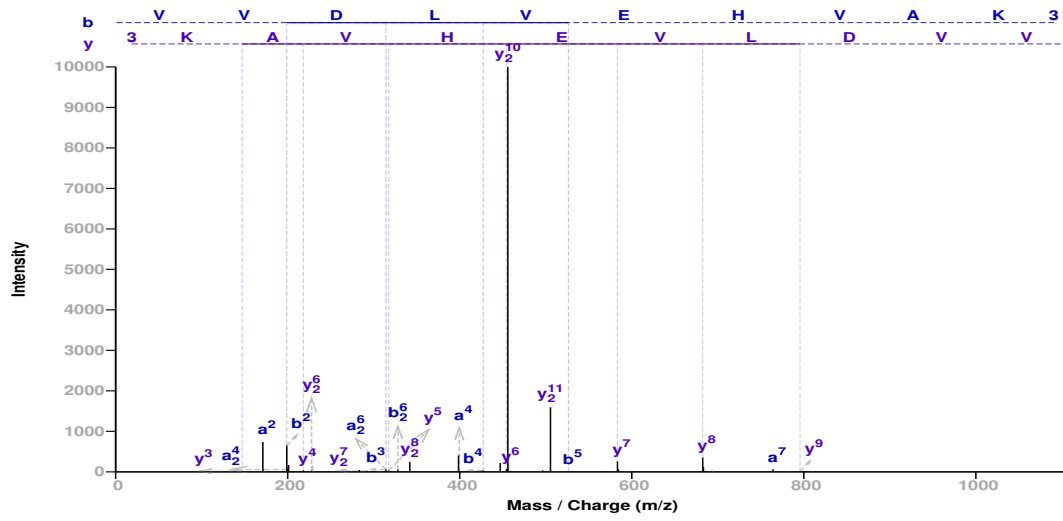

yeast1\_Scan\_Number\_2954 Precursor m/z: 387.211 cosine: 0.824  $\alpha$ : 0.149

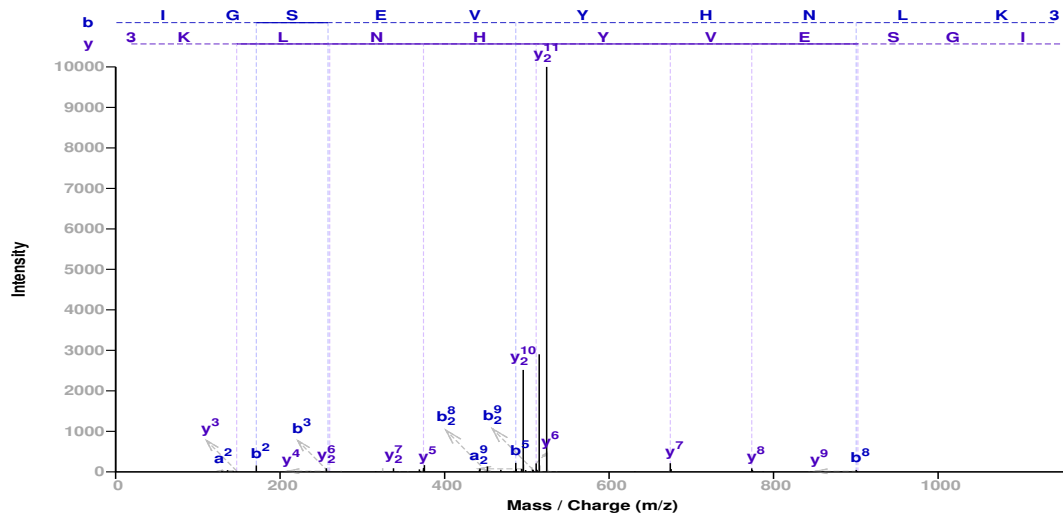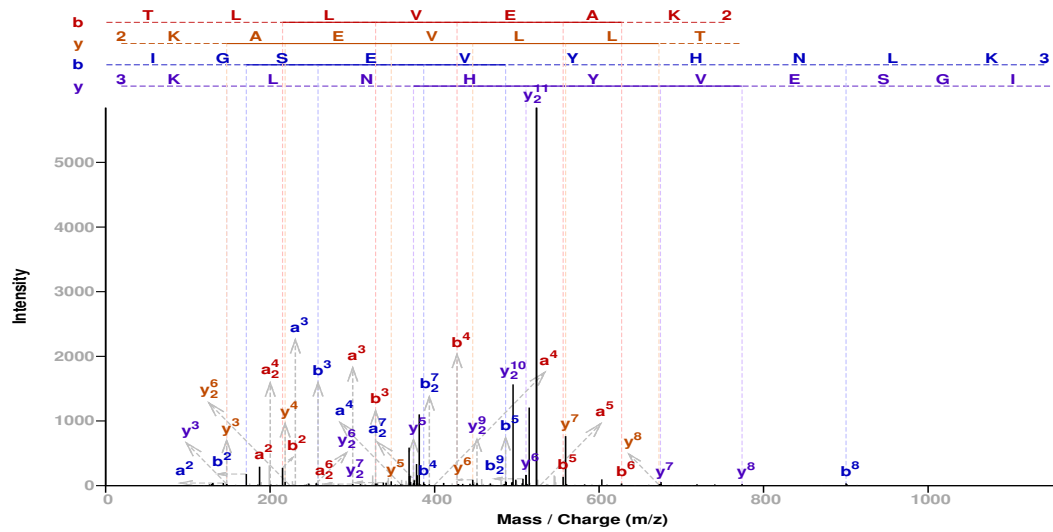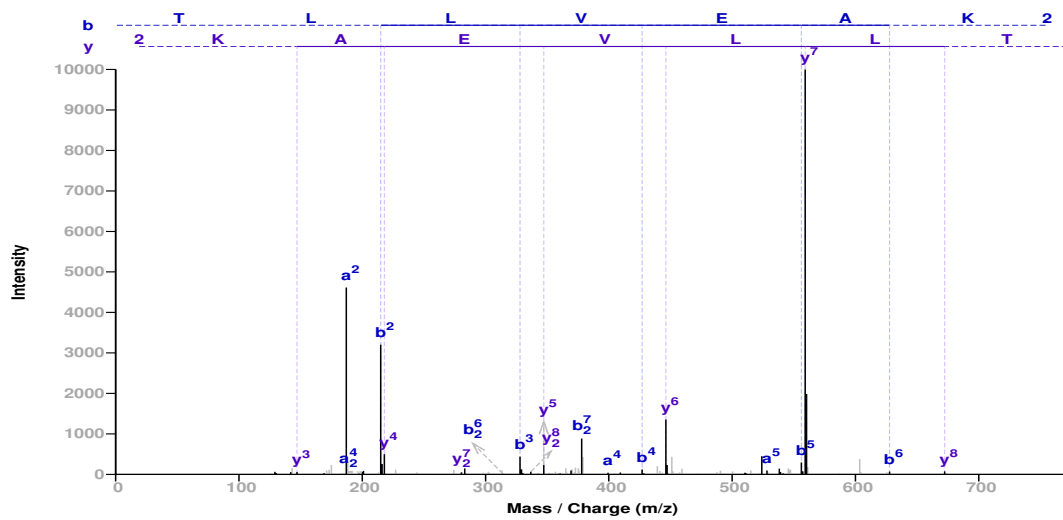

yeast1\_Scan\_Number\_6468 Precursor m/z: 449.273 cosine: 0.881  $\alpha$ : 0.148

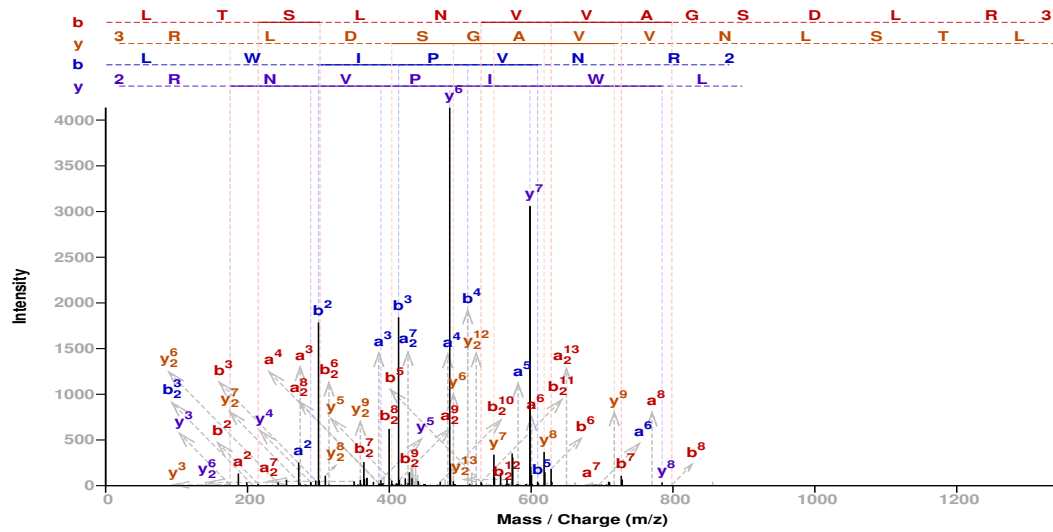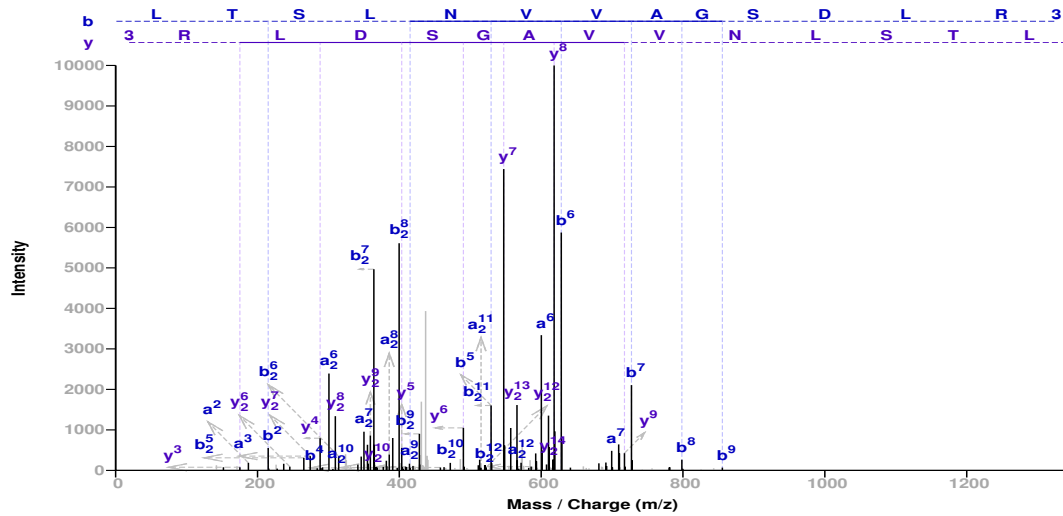



yeast1\_Scan\_Number\_5420 Precursor m/z: 602.323 cosine: 0.879  $\alpha$ : 0.146

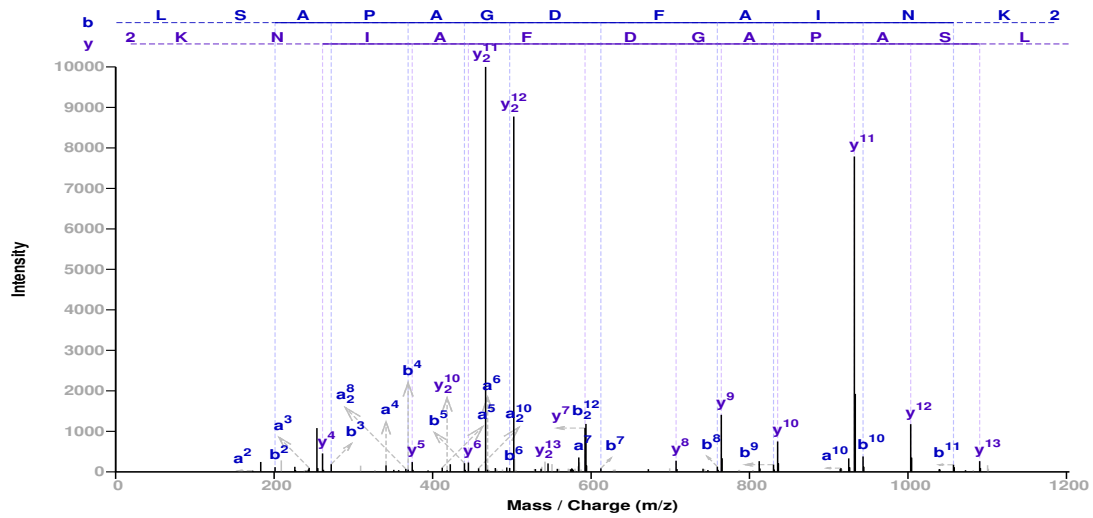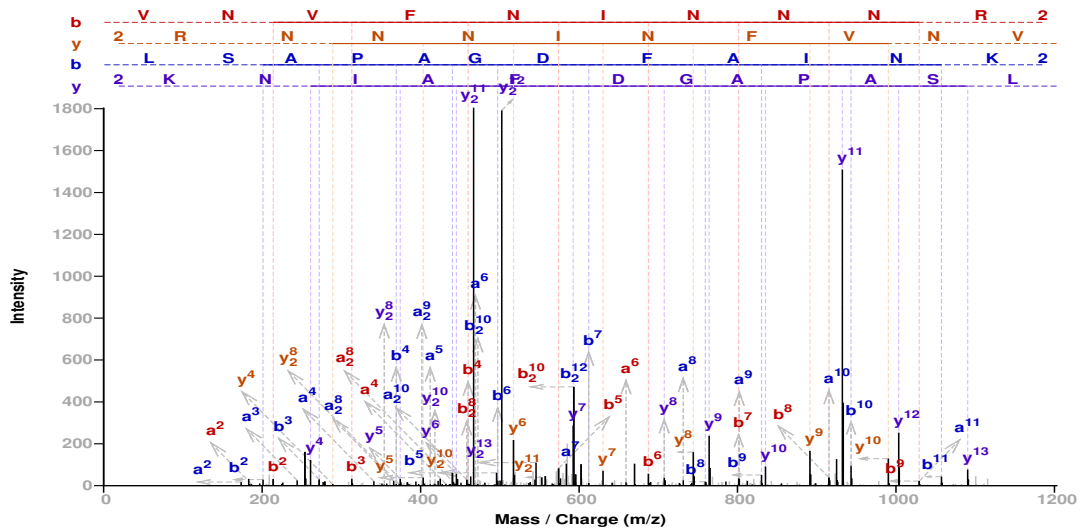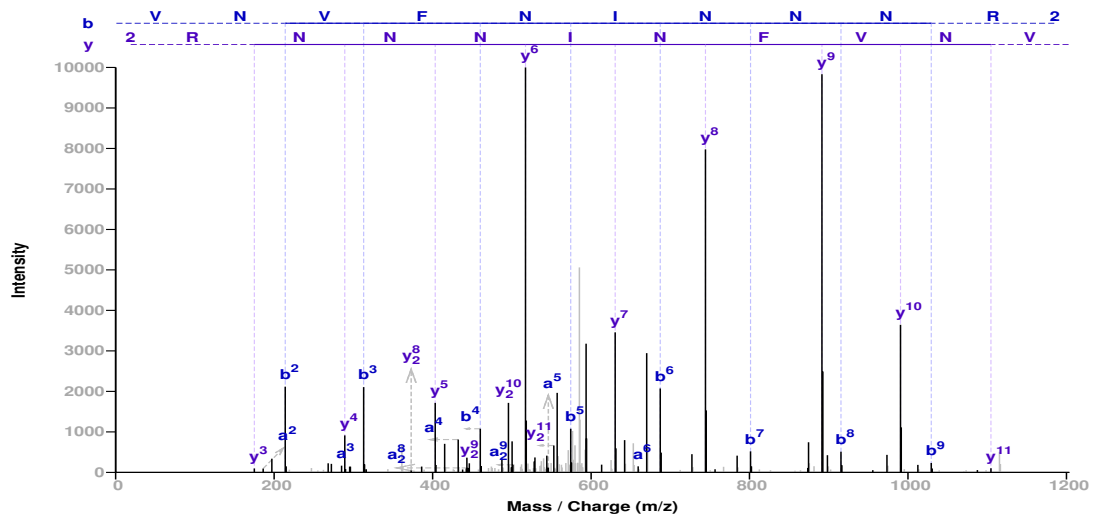

yeast1\_Scan\_Number\_6299 Precursor m/z: 514.773 cosine: 0.827  $\alpha$ : 0.139

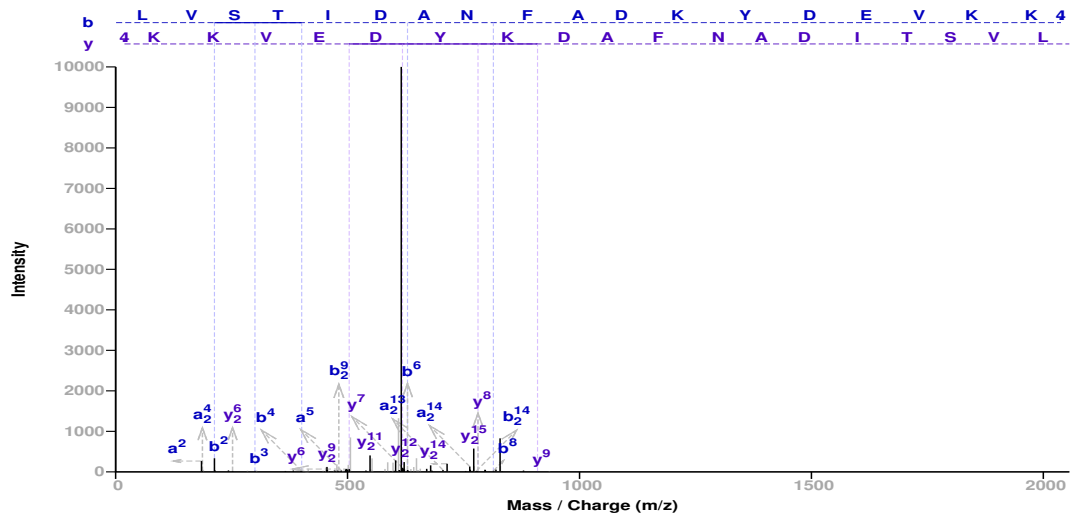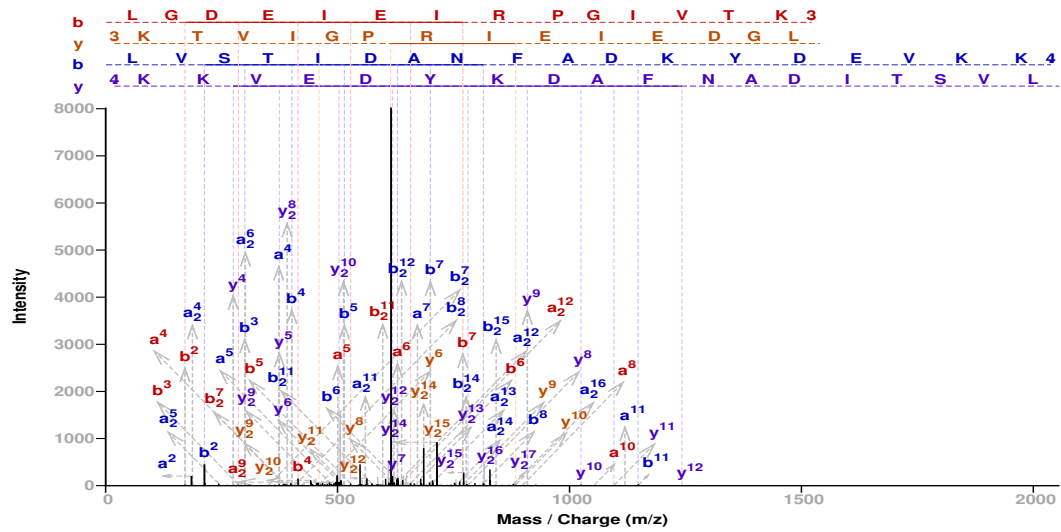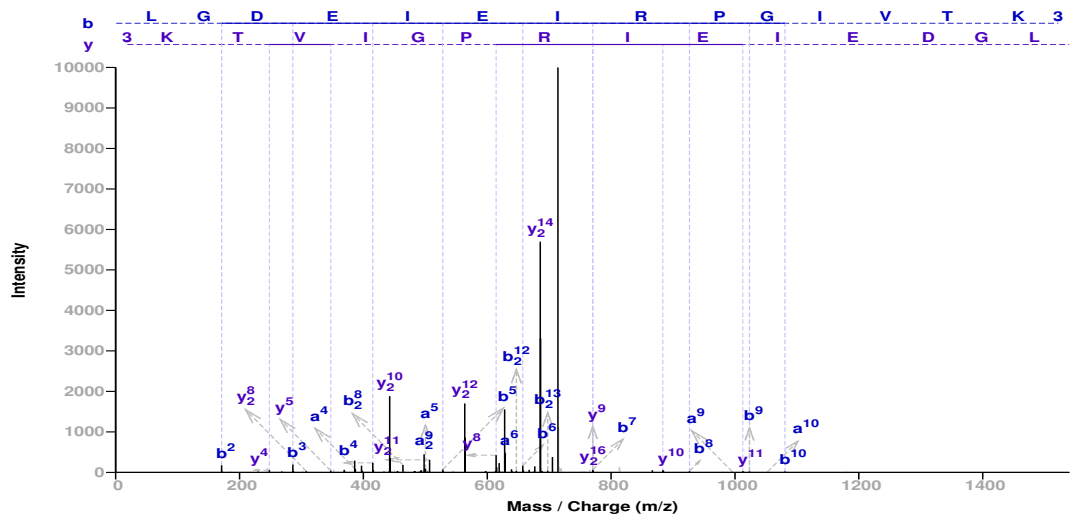

yeast1\_Scan\_Number\_3810 Precursor m/z: 412.877 cosine: 0.951  $\alpha$ : 0.134

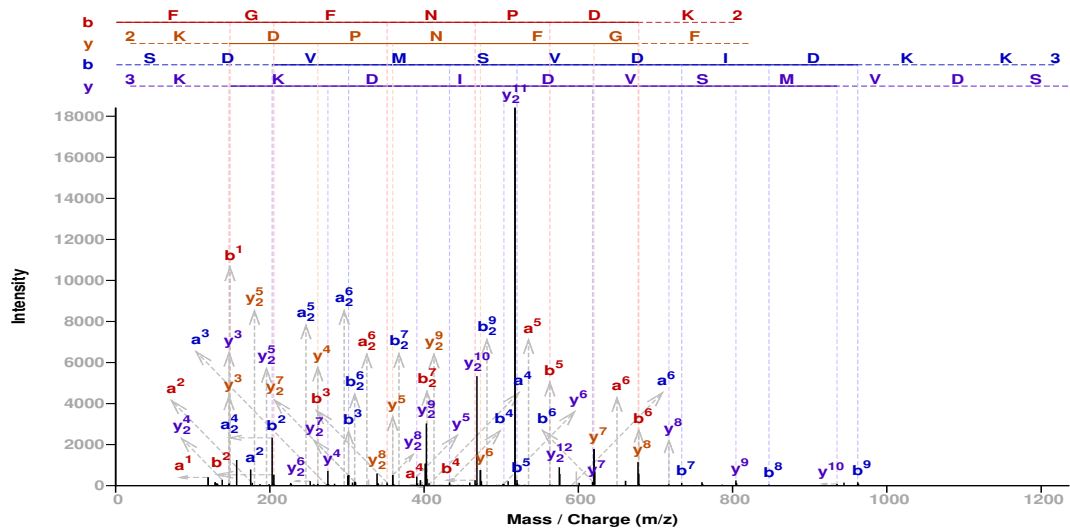



yeast1\_Scan\_Number\_641 Precursor m/z: 458.760 cosine: 0.781  $\alpha$ : 0.117

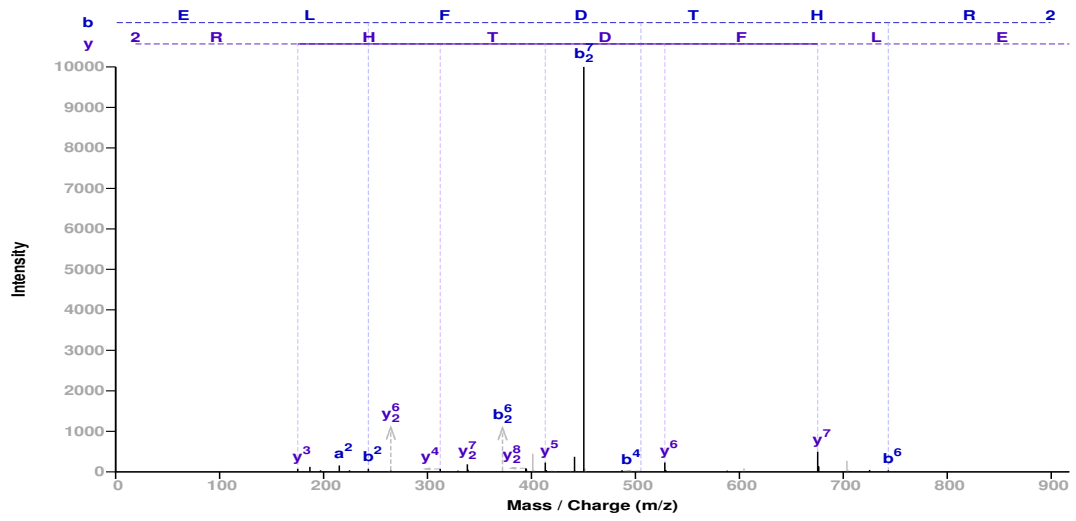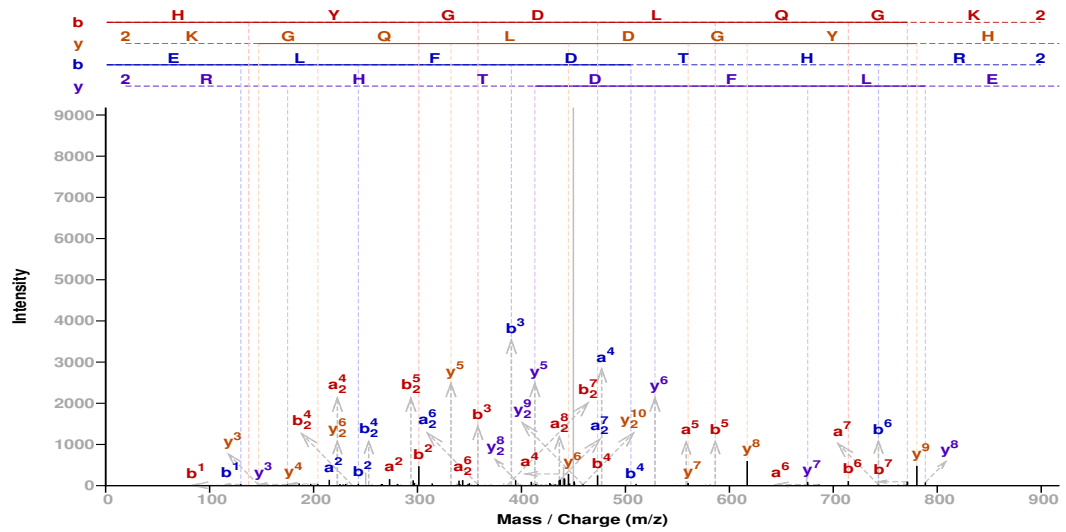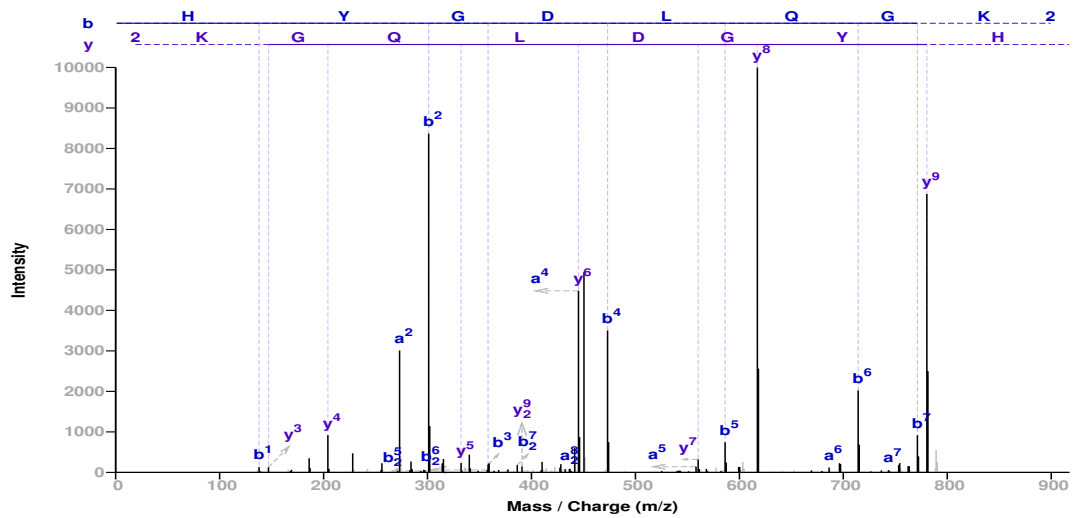

yeast1\_Scan\_Number\_3893 Precursor m/z: 393.731 cosine: 0.952  $\alpha$ : 0.107

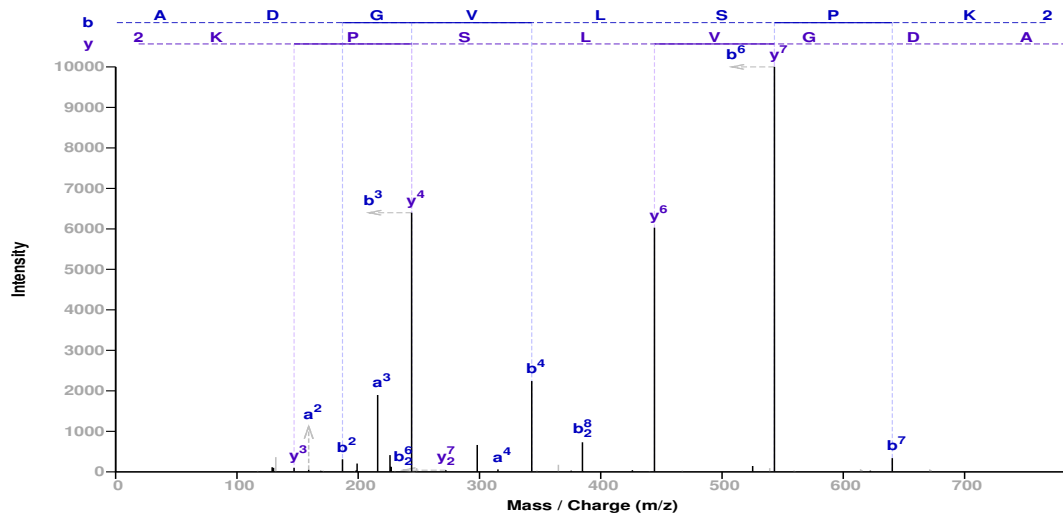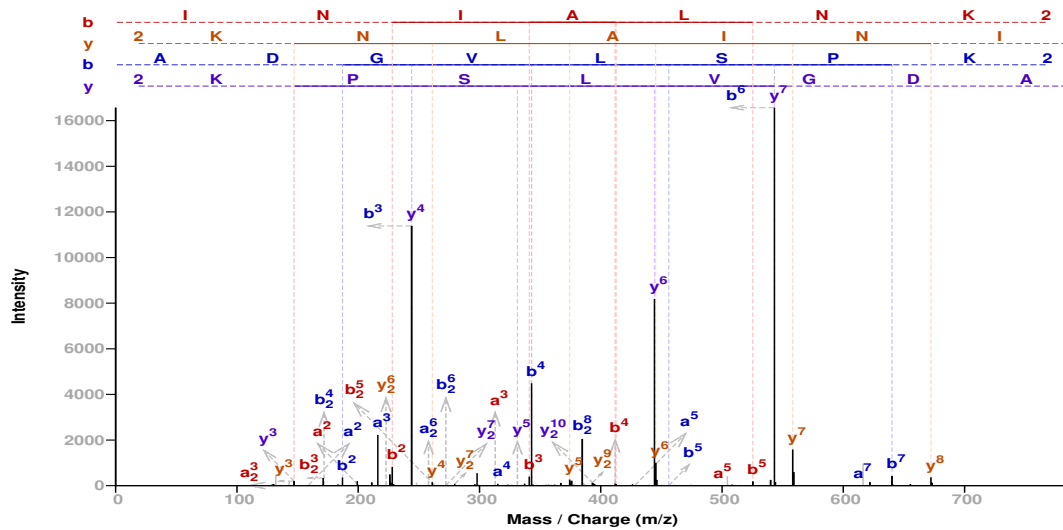

yeast1\_Scan\_Number\_3533 Precursor m/z: 509.273 cosine: 0.845  $\alpha$ : 0.100

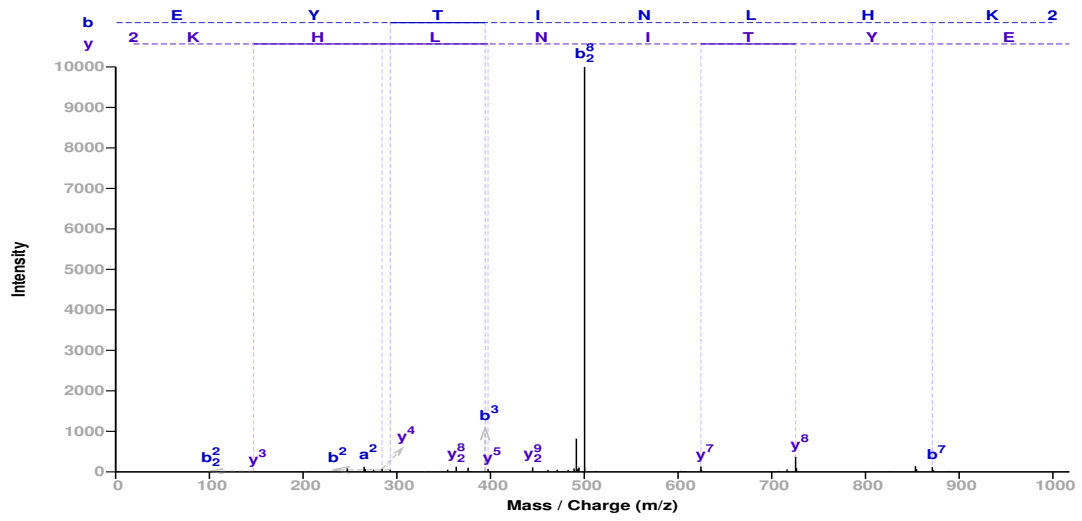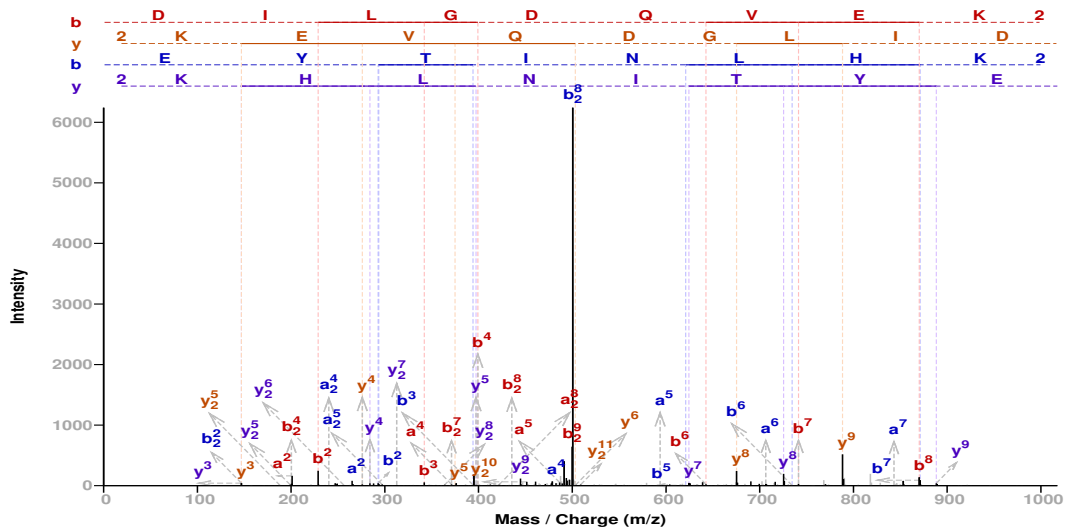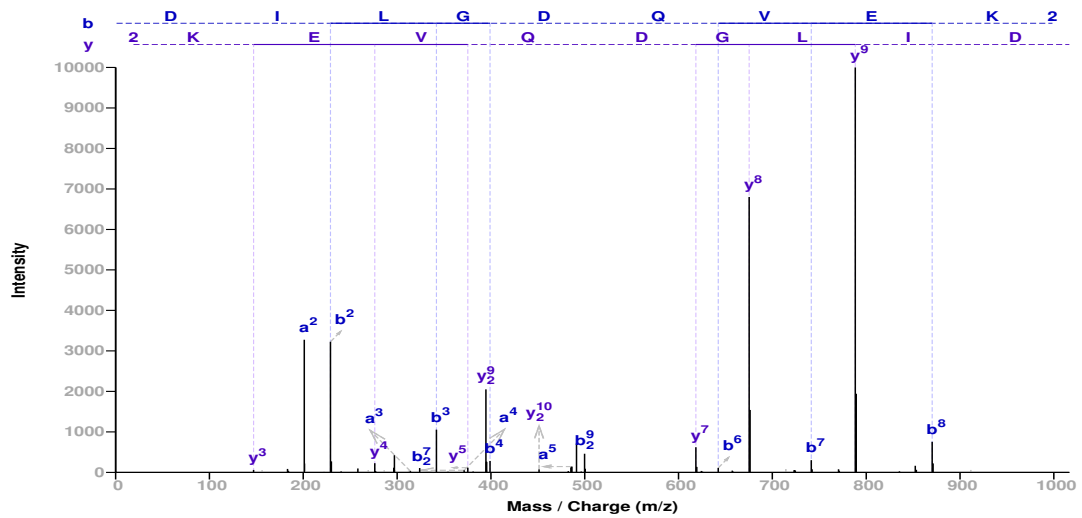





yeast2\_Scan\_Number\_7805 Precursor m/z: 651.368 cosine: 0.830  $\alpha$ : 0.964

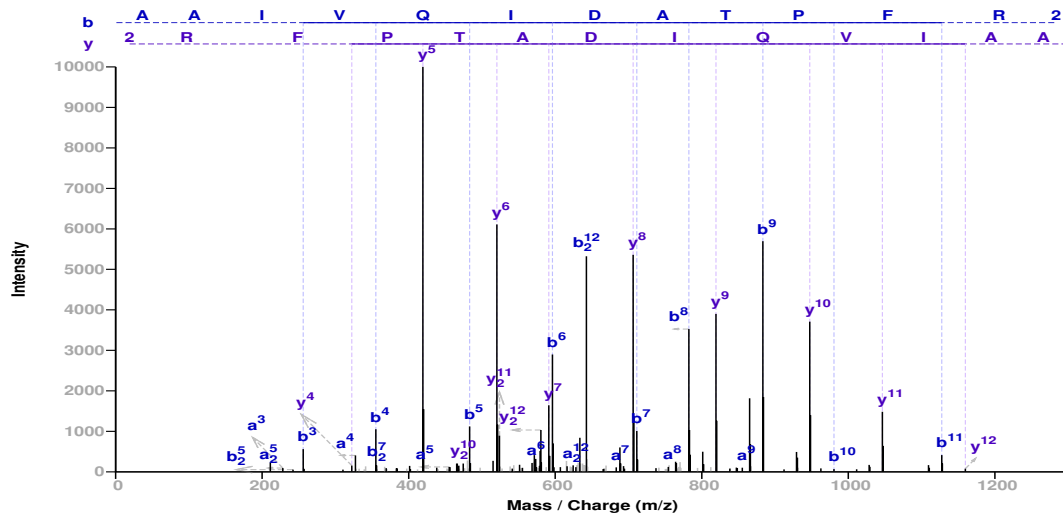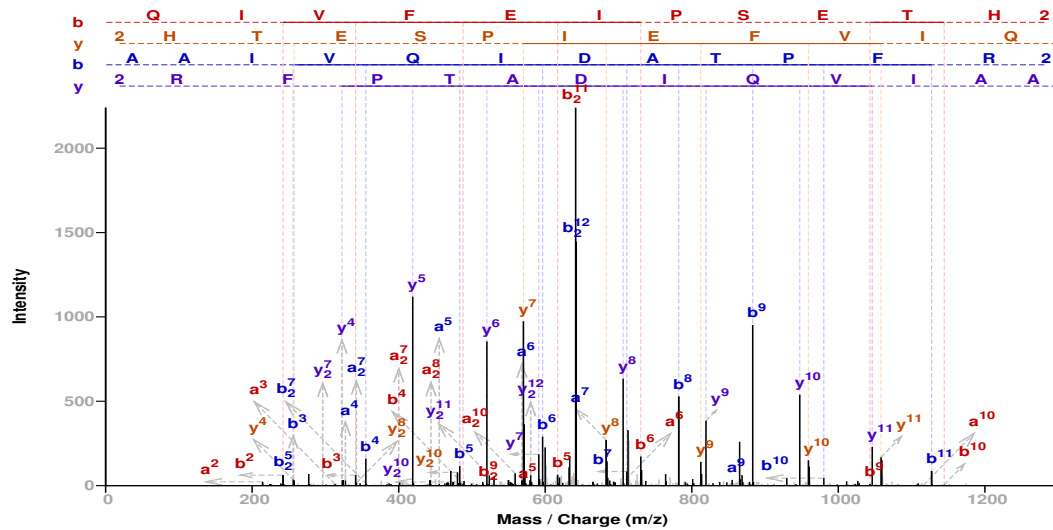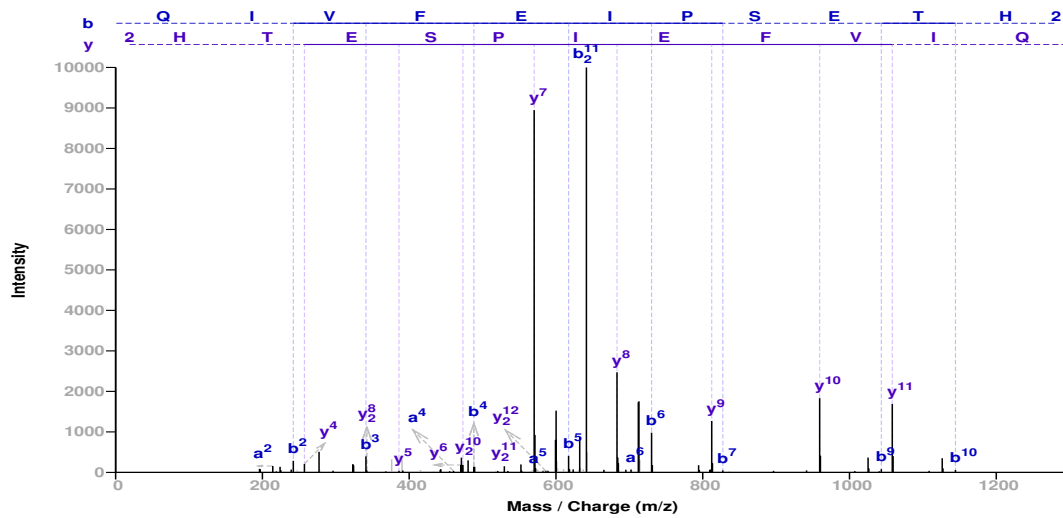

yeast2.Scan\_Number\_4319 Precursor m/z: 440.733 cosine: 0.804  $\alpha$ : 0.963

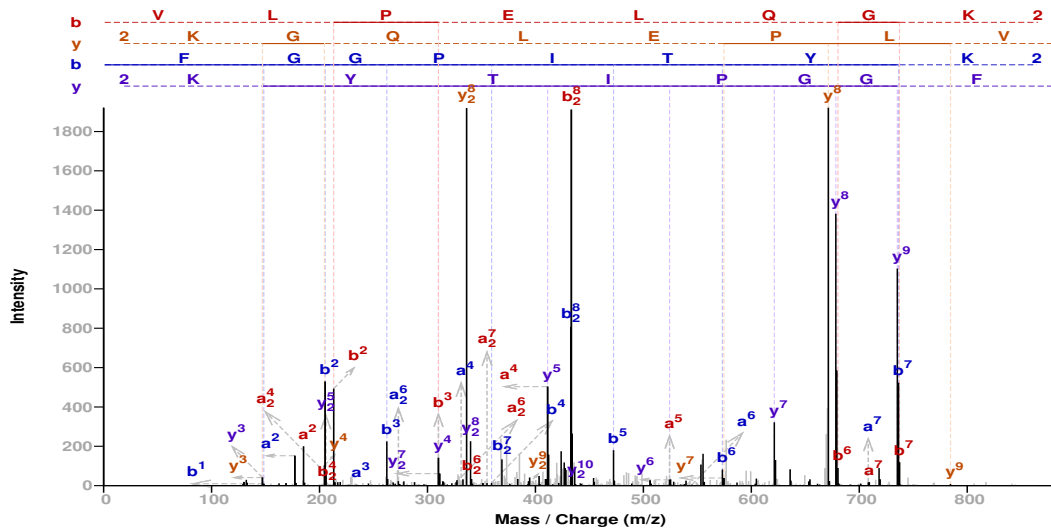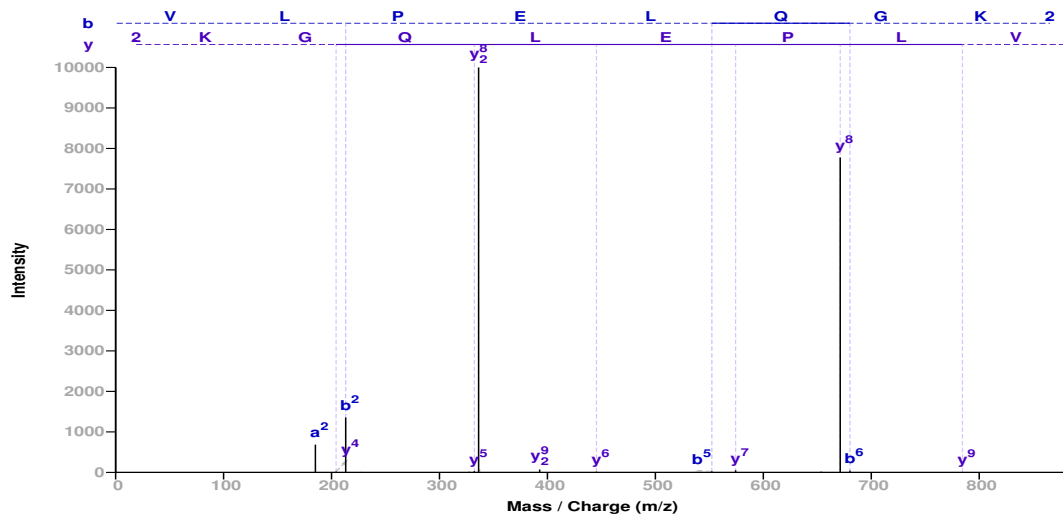

yeast2\_Scan\_Number\_7303 Precursor m/z: 593.334 cosine: 0.894  $\alpha$ : 0.953

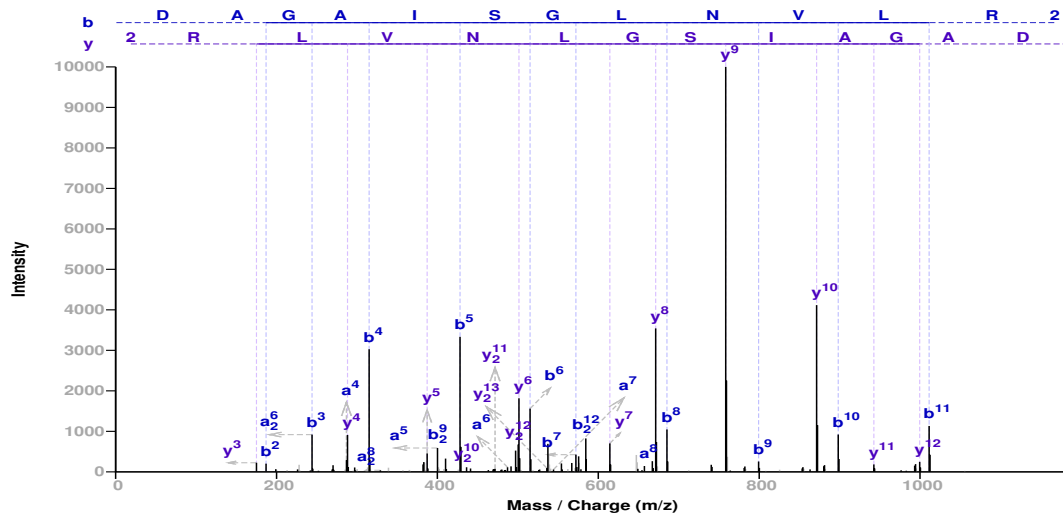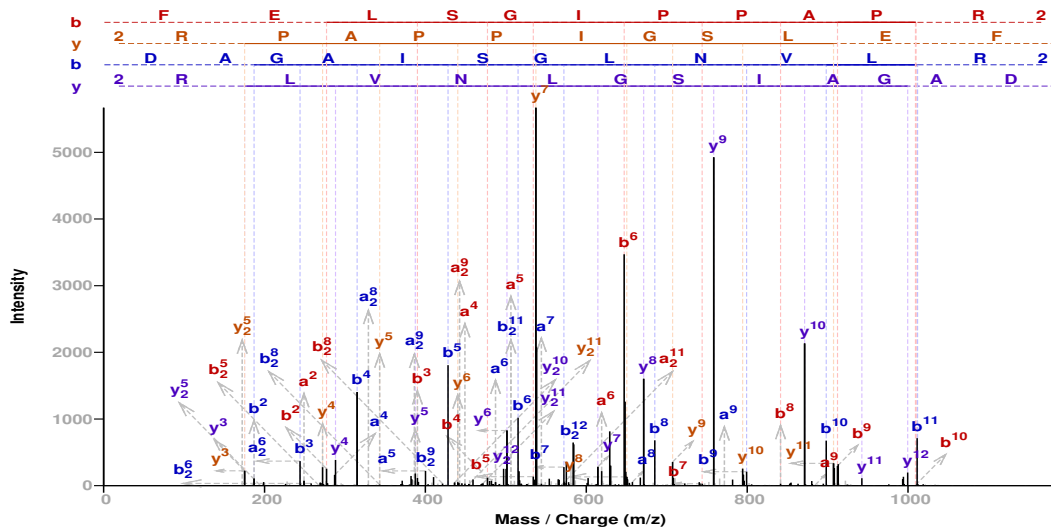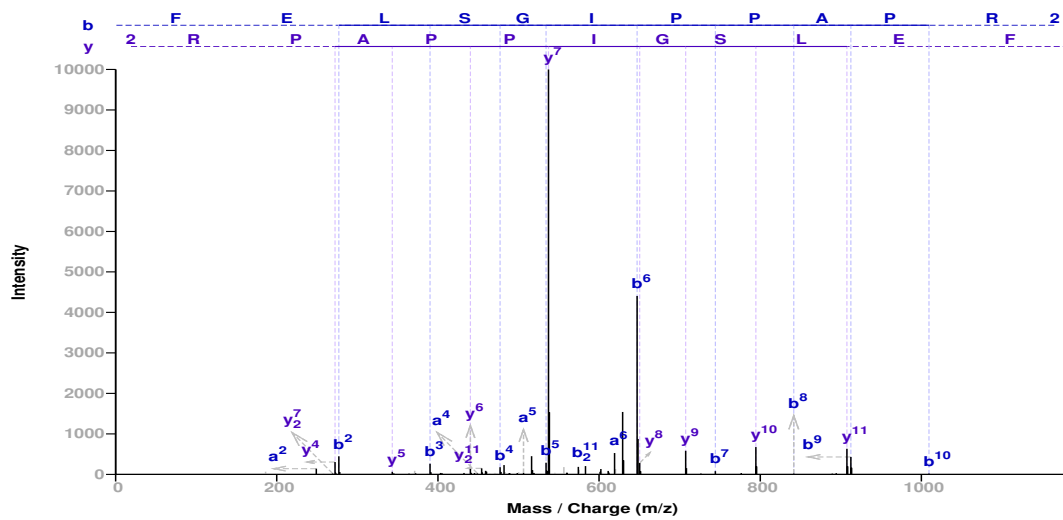

yeast2\_Scan\_Number\_2651 Precursor m/z: 365.728 cosine: 0.798  $\alpha$ : 0.947

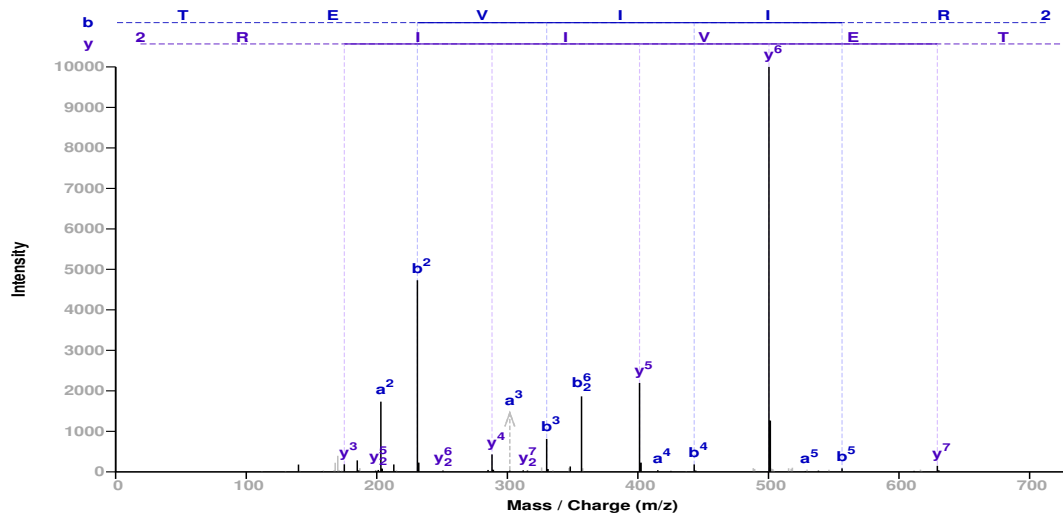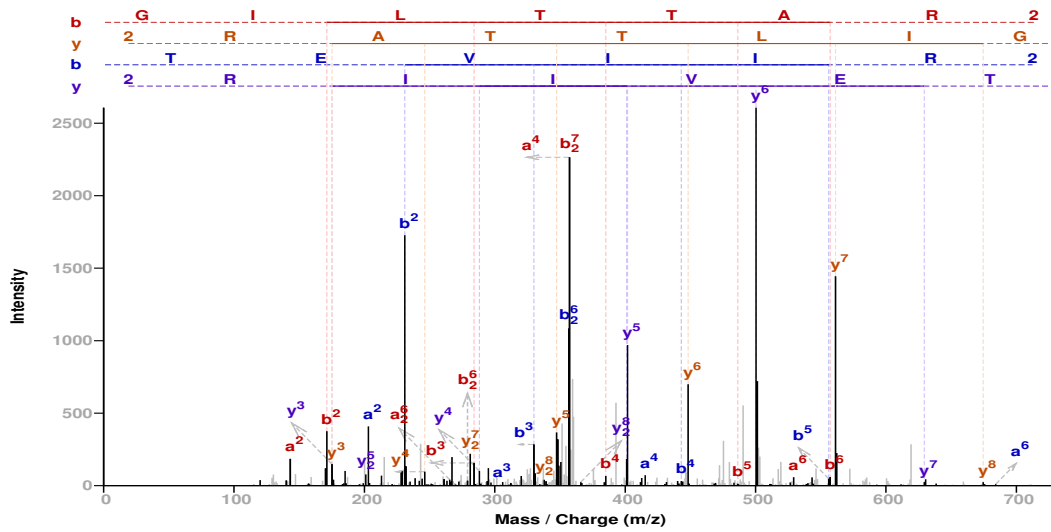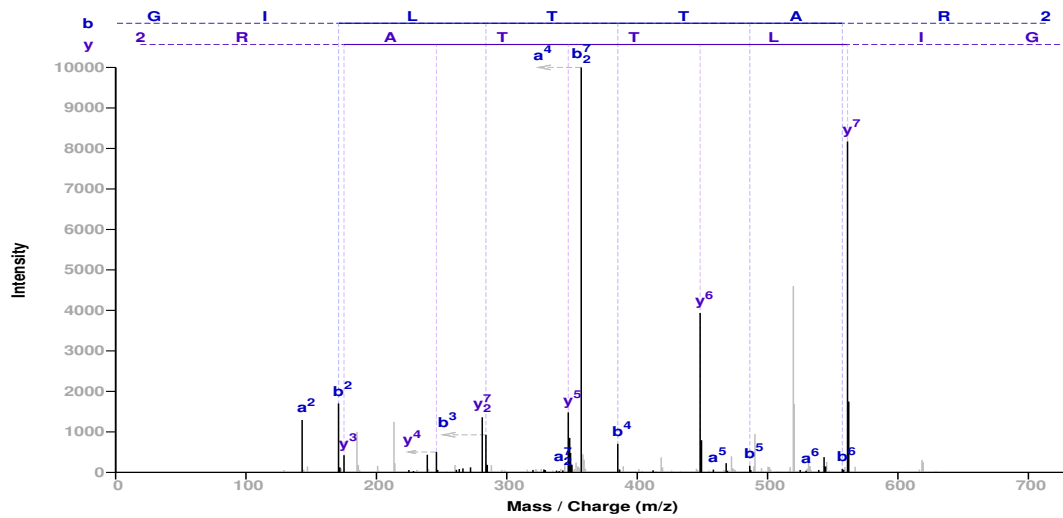

yeast2.Scan\_Number\_8323 Precursor m/z: 551.820 cosine: 0.744  $\alpha$ : 0.944

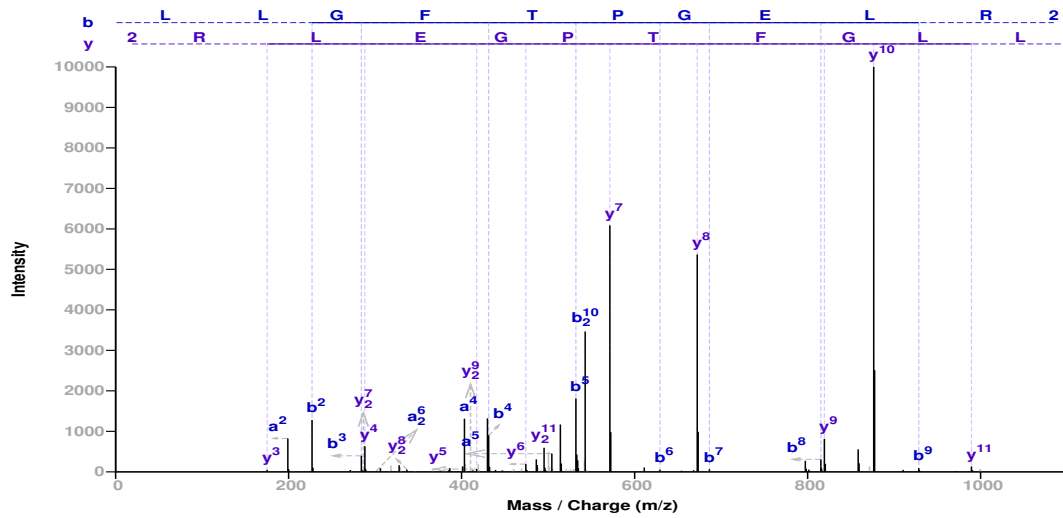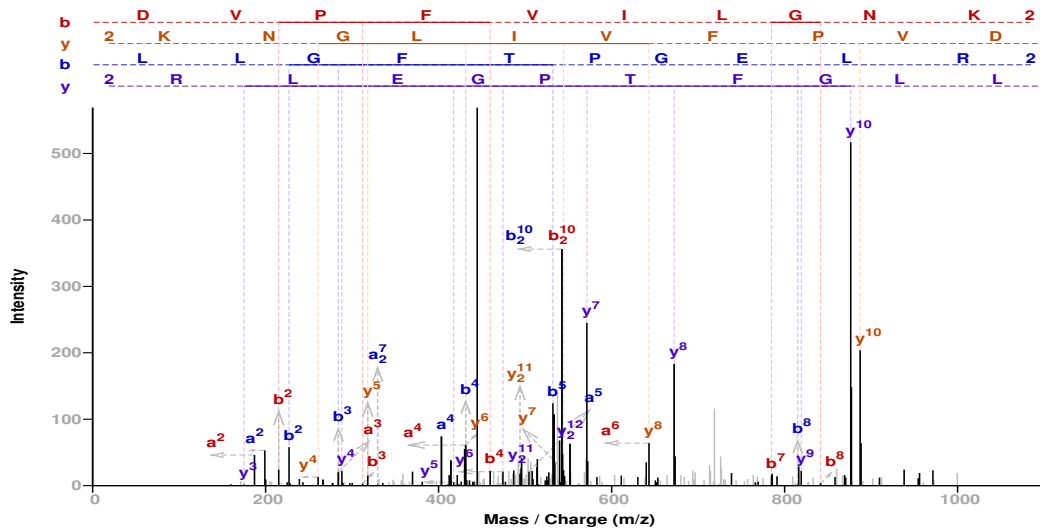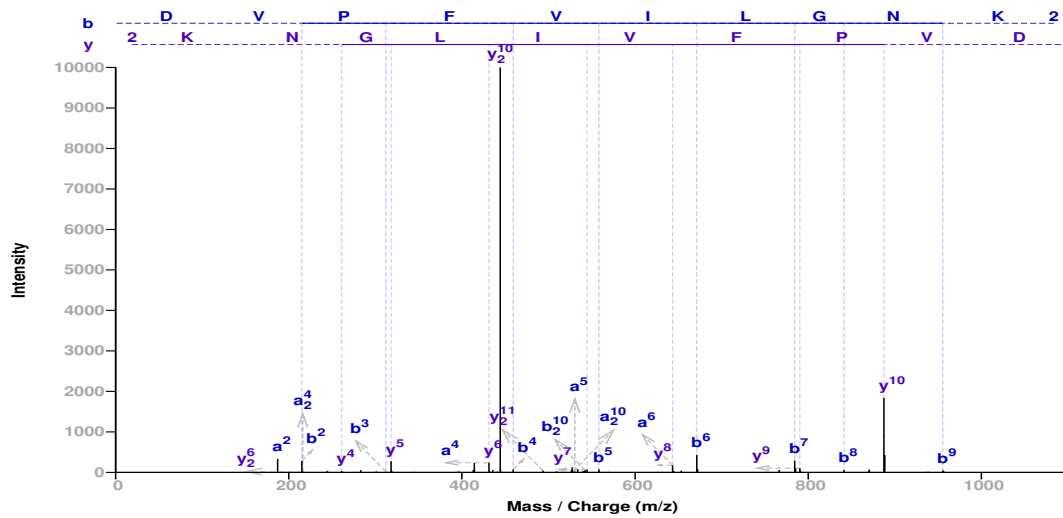

yeast2\_Scan\_Number\_7067 Precursor m/z: 735.390 cosine: 0.797  $\alpha$ : 0.927

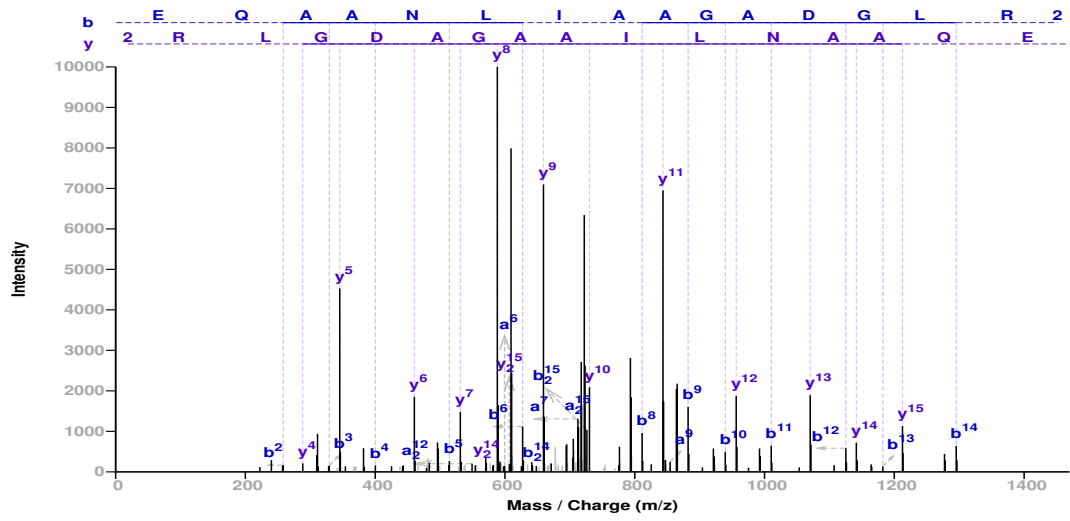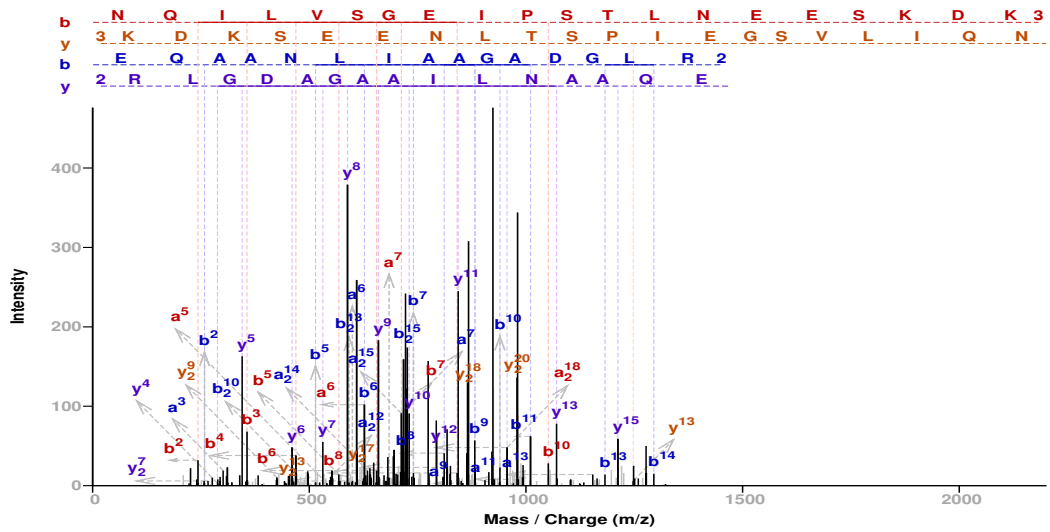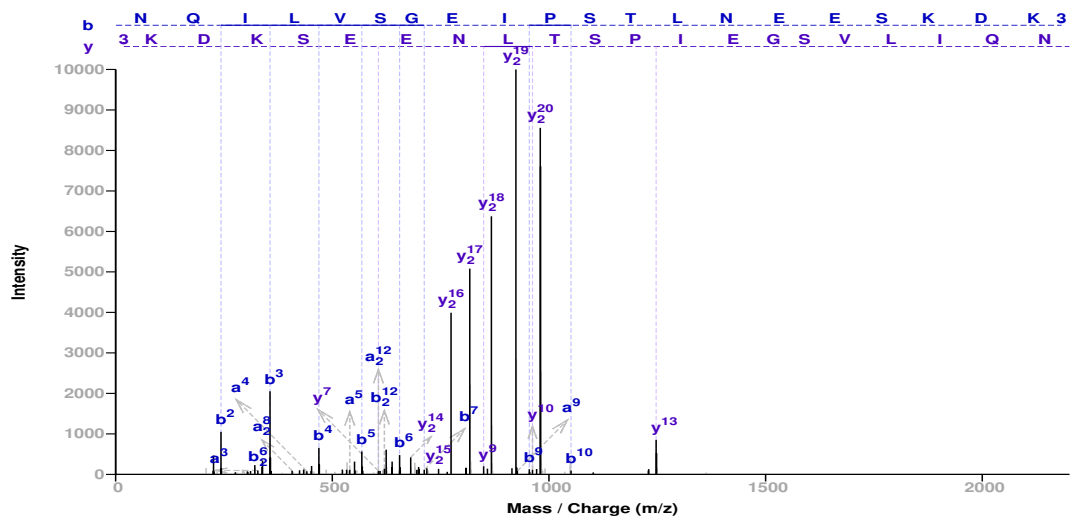

yeast2.Scan\_Number.2023 Precursor m/z: 467.741 cosine: 0.927  $\alpha$ : 0.907

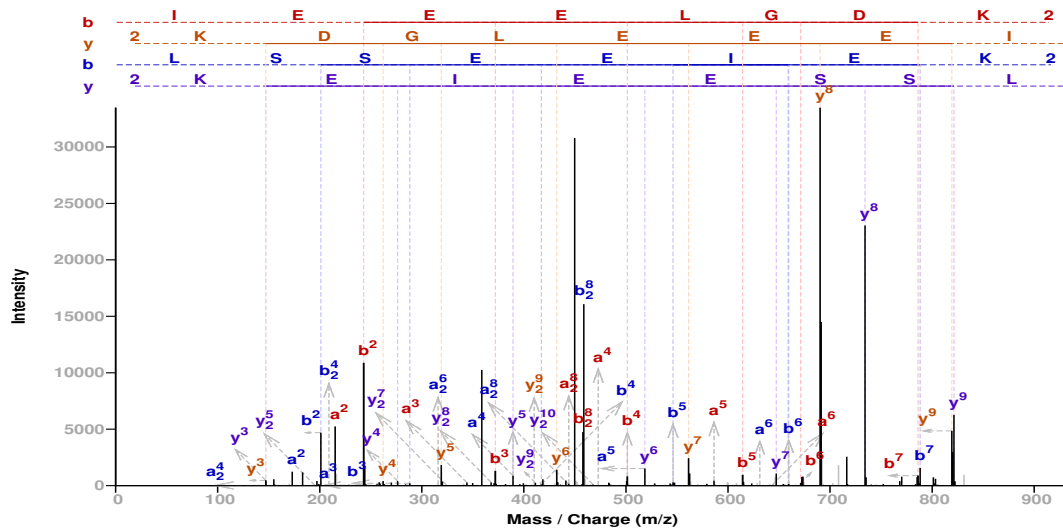

yeast2\_Scan\_Number\_5538 Precursor m/z: 412.565 cosine: 0.927  $\alpha$ : 0.859

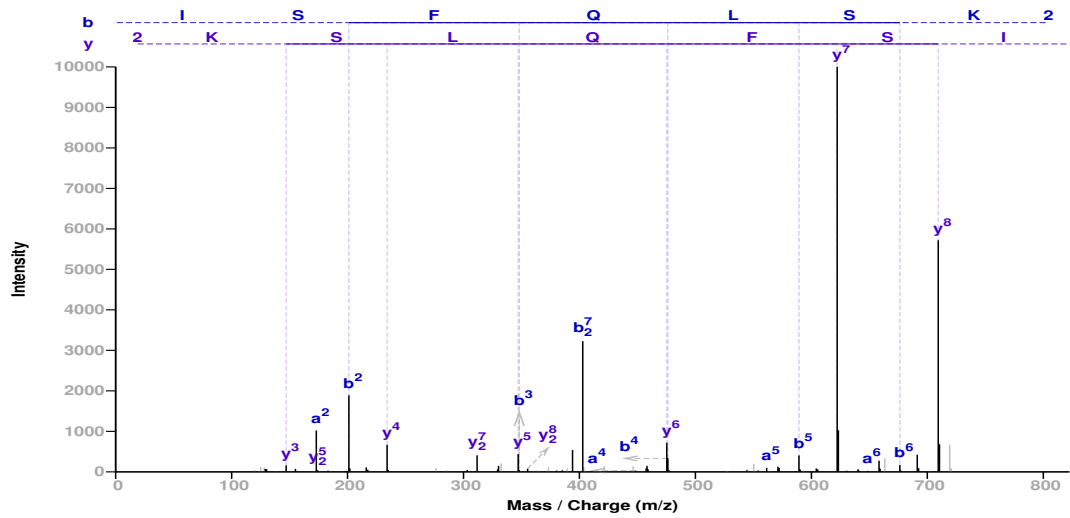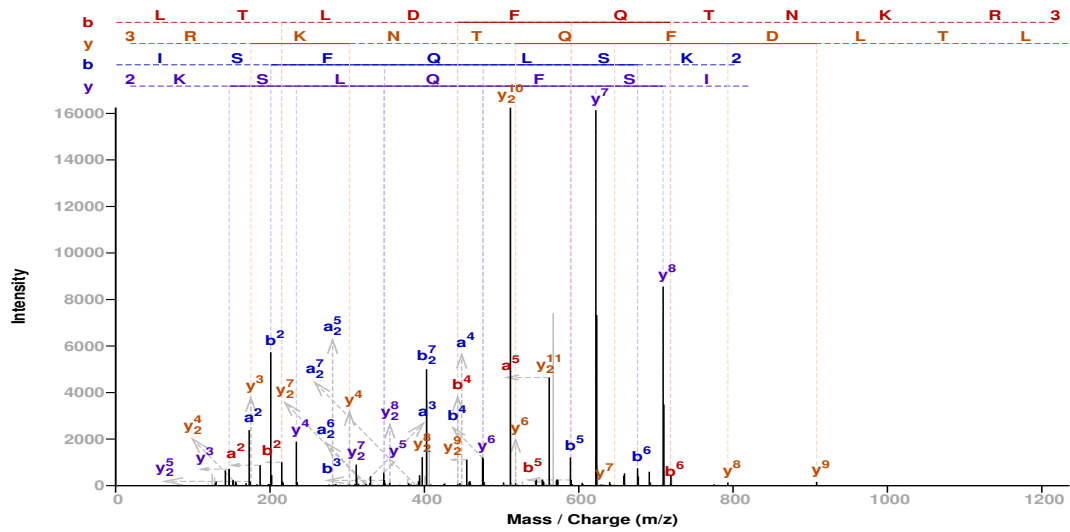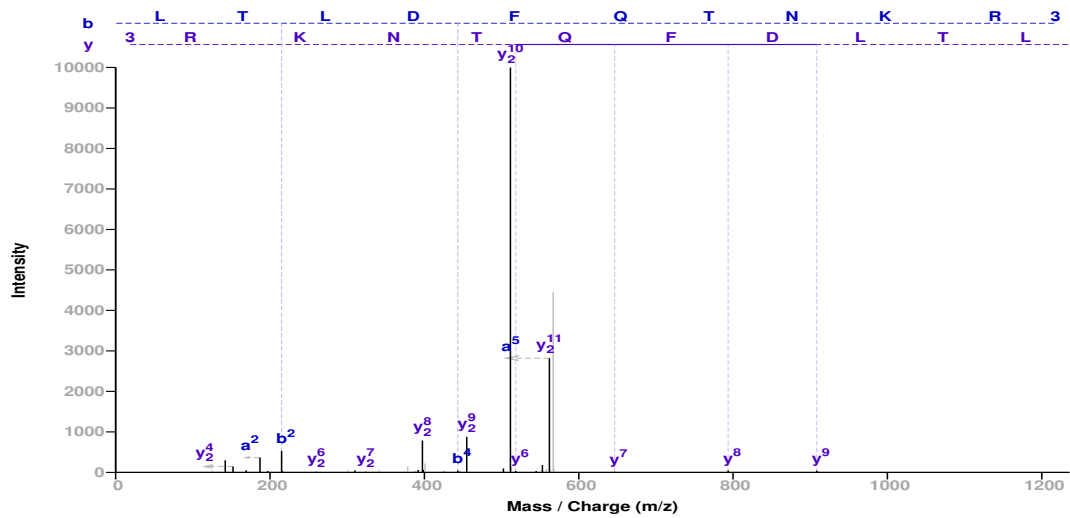



yeast2.Scan\_Number\_4326 Precursor m/z: 442.266 cosine: 0.785  $\alpha$ : 0.858

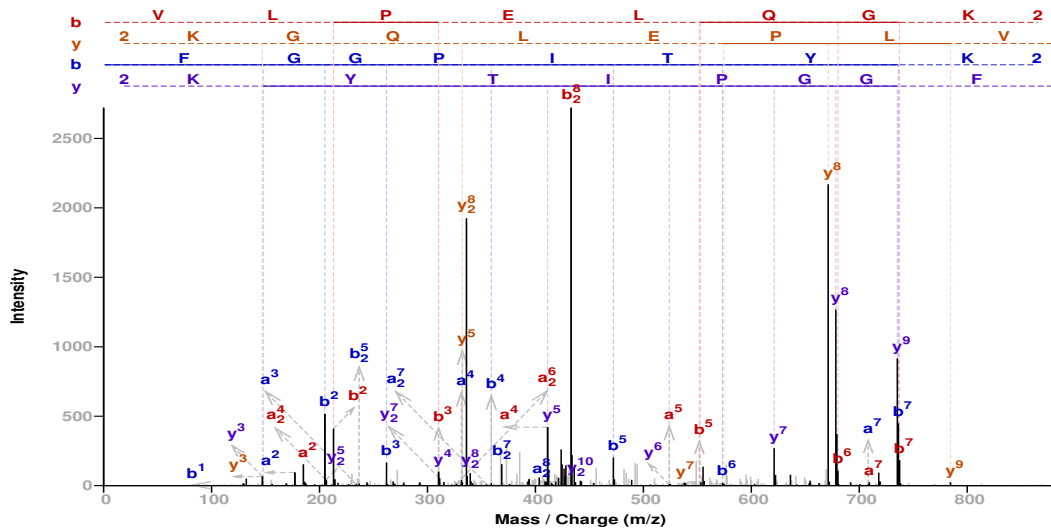

yeast2\_Scan\_Number\_2008 Precursor m/z: 502.760 cosine: 0.763  $\alpha$ : 0.848

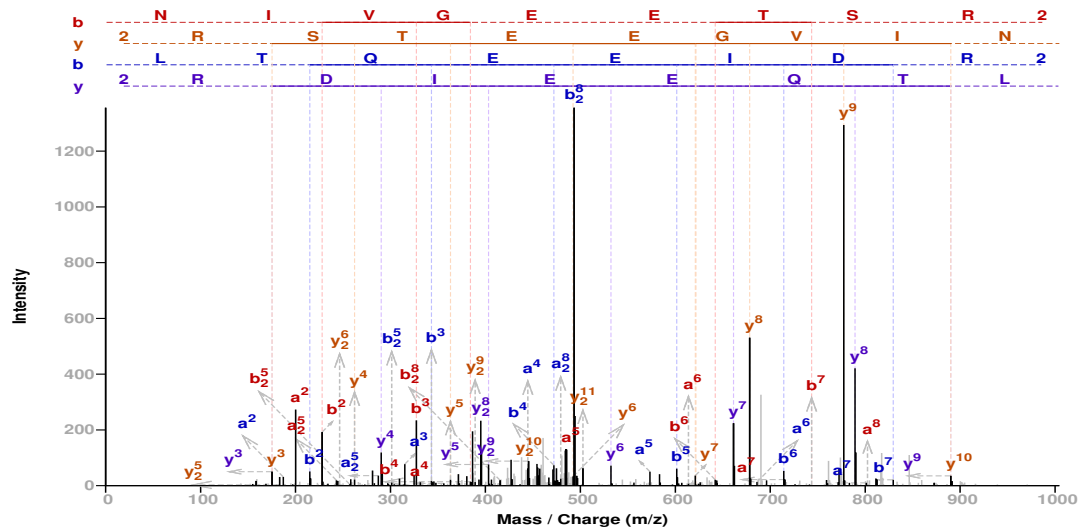

yeast2\_Scan\_Number\_5024 Precursor m/z: 477.578 cosine: 0.813  $\alpha$ : 0.840

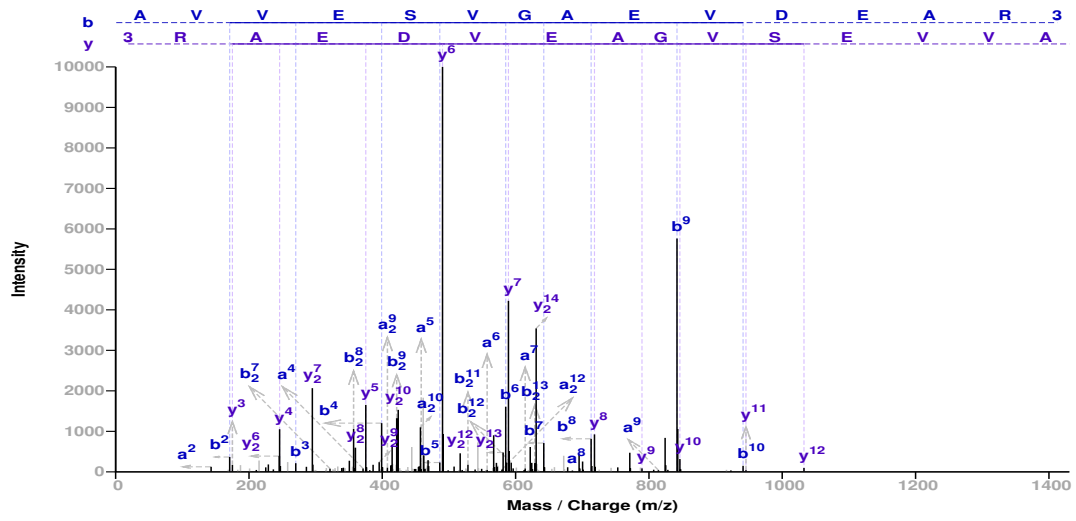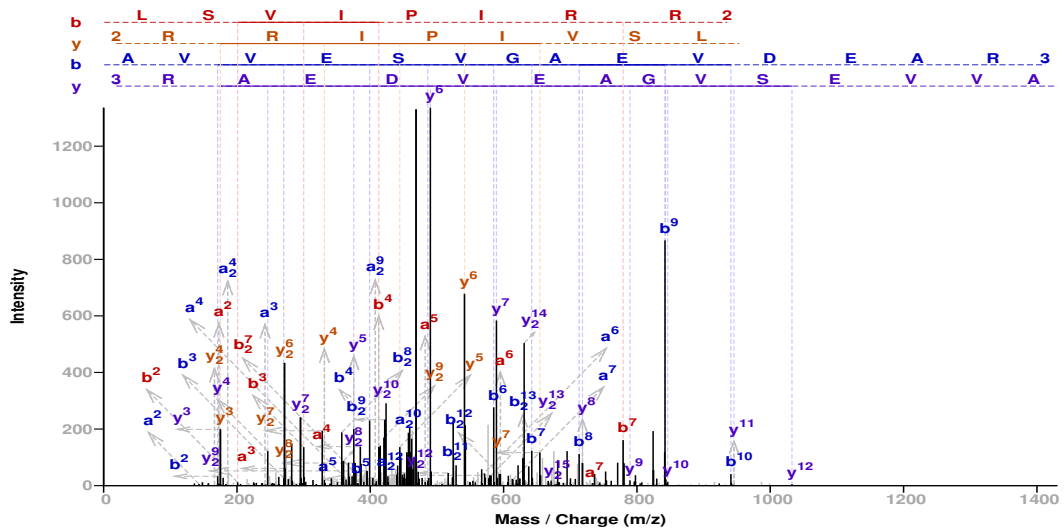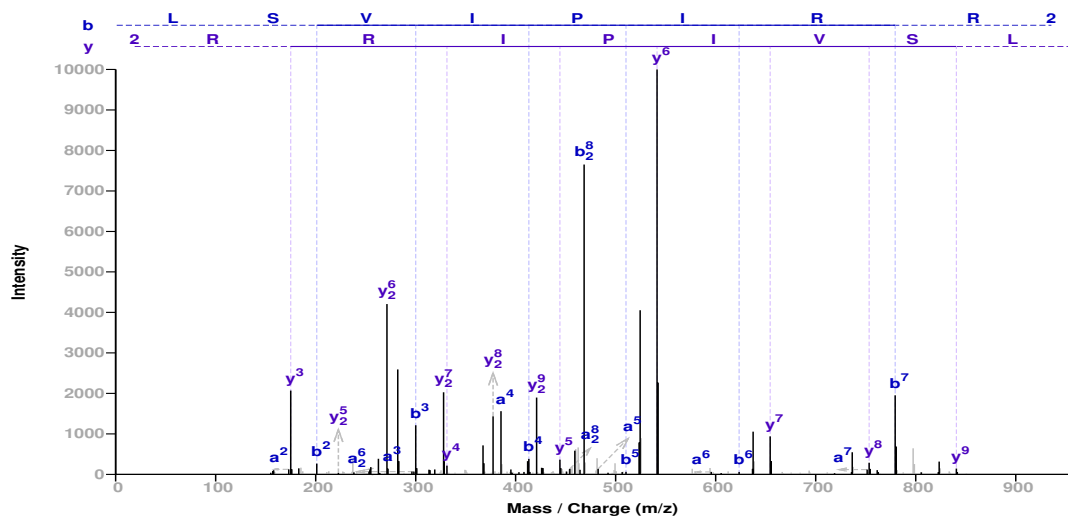

yeast2\_Scan\_Number\_1109 Precursor m/z: 519.749 cosine: 0.803  $\alpha$ : 0.838

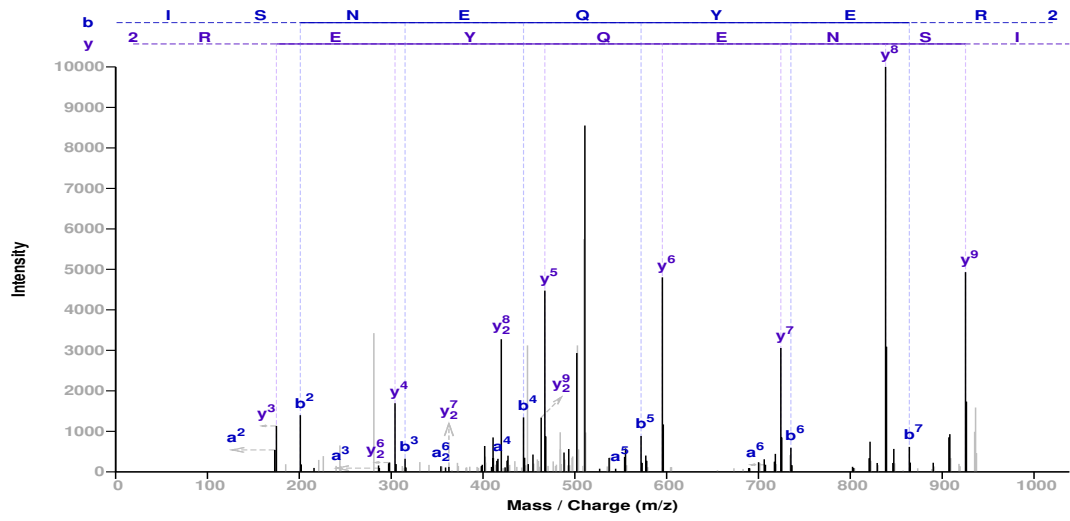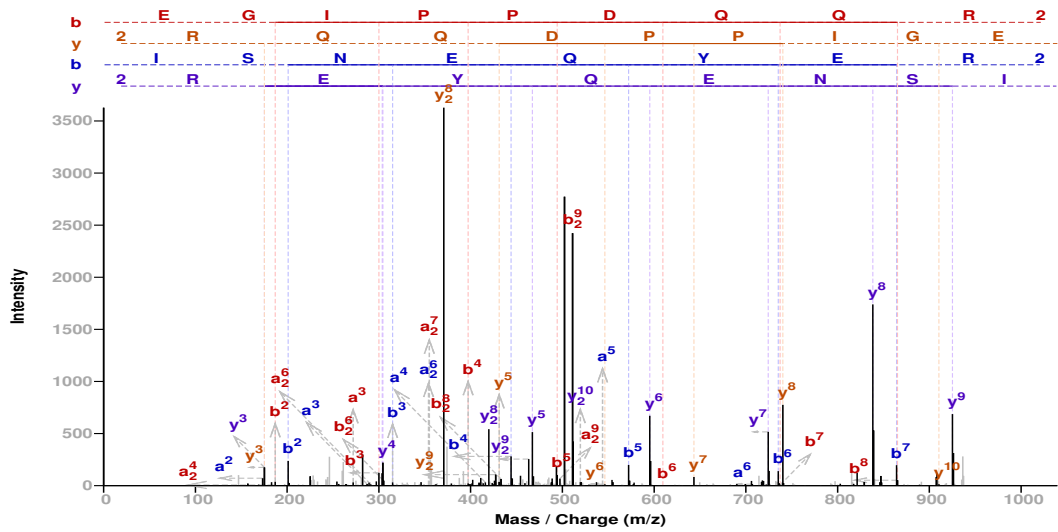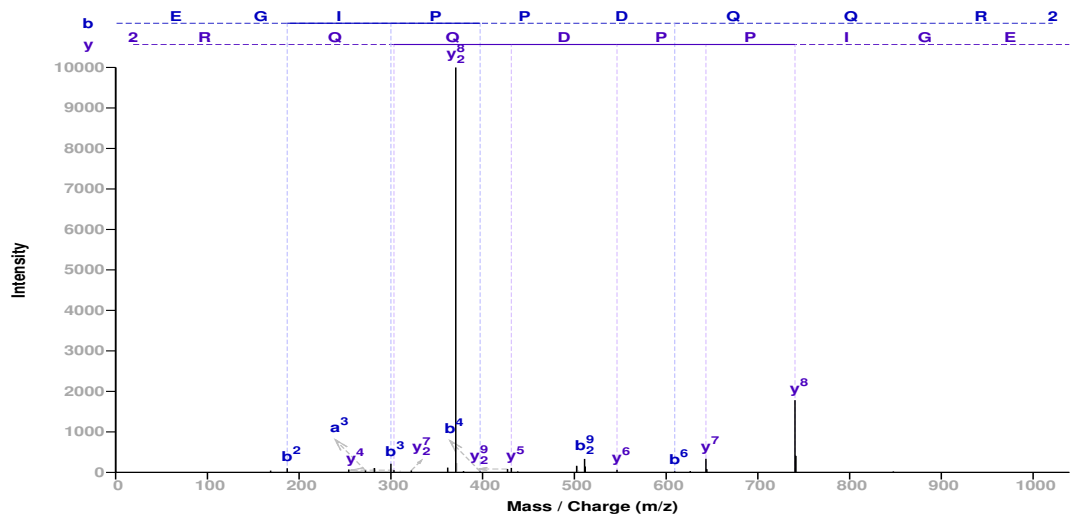

yeast2.Scan\_Number\_5851 Precursor m/z: 558.796 cosine: 0.782  $\alpha$ : 0.838

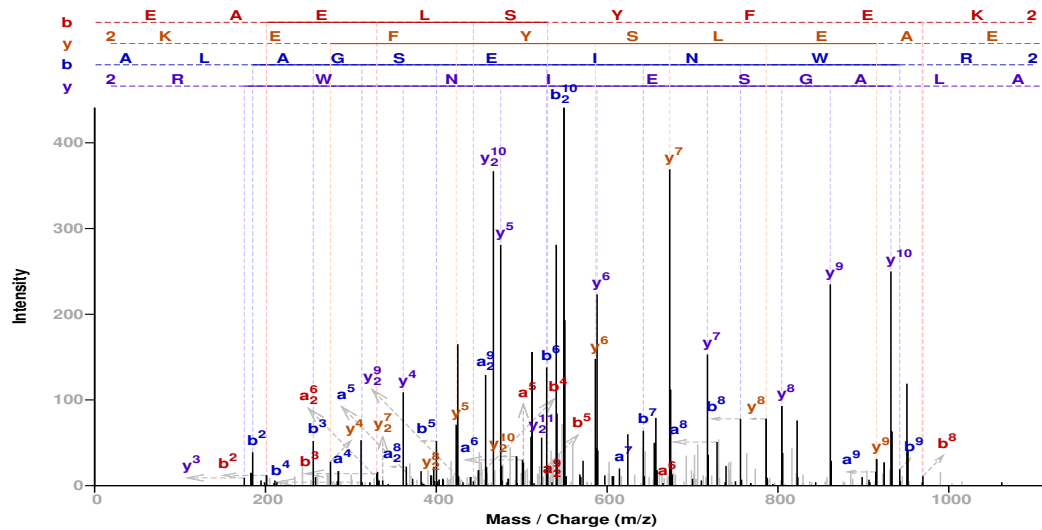

yeast2\_Scan\_Number\_3812 Precursor m/z: 531.758 cosine: 0.888  $\alpha$ : 0.835

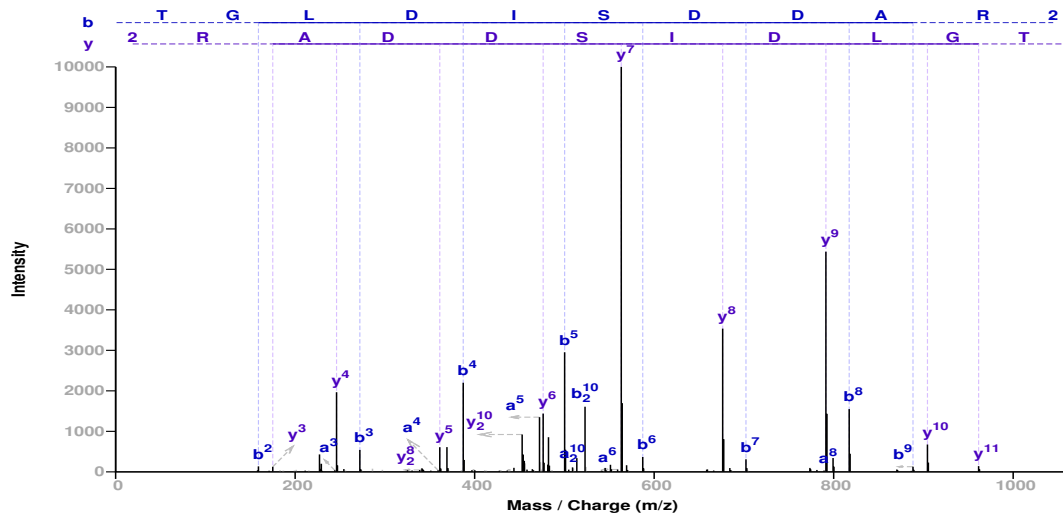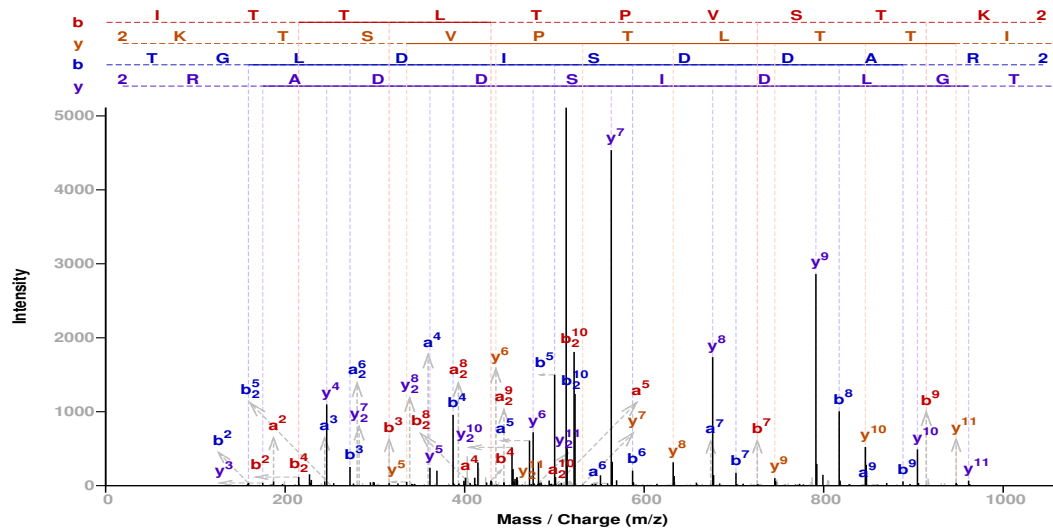

yeast2\_Scan\_Number\_3794 Precursor m/z: 627.822 cosine: 0.842  $\alpha$ : 0.829

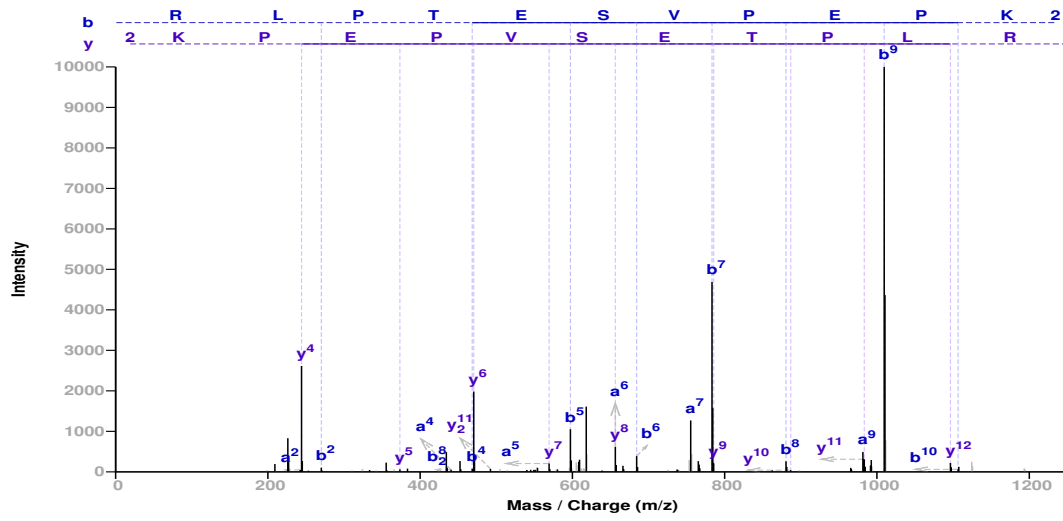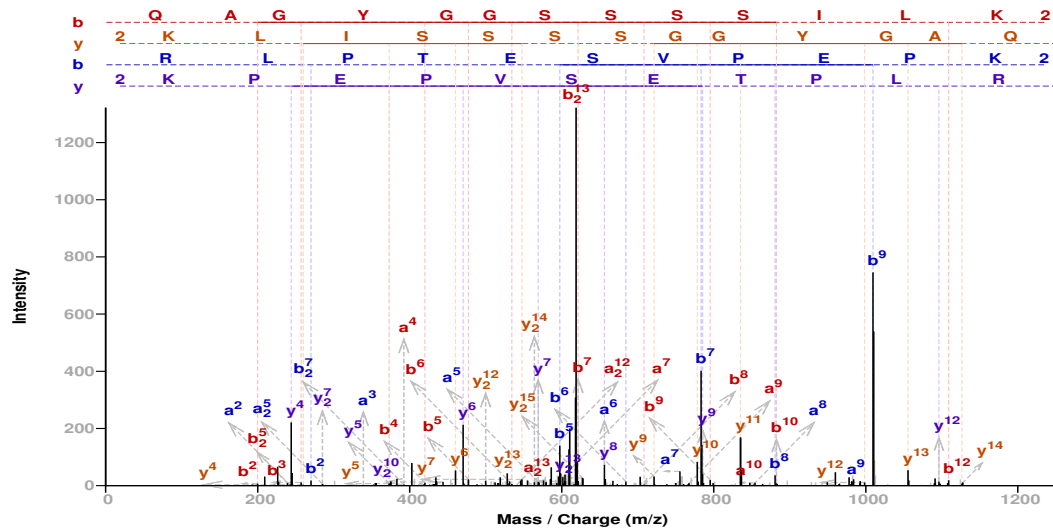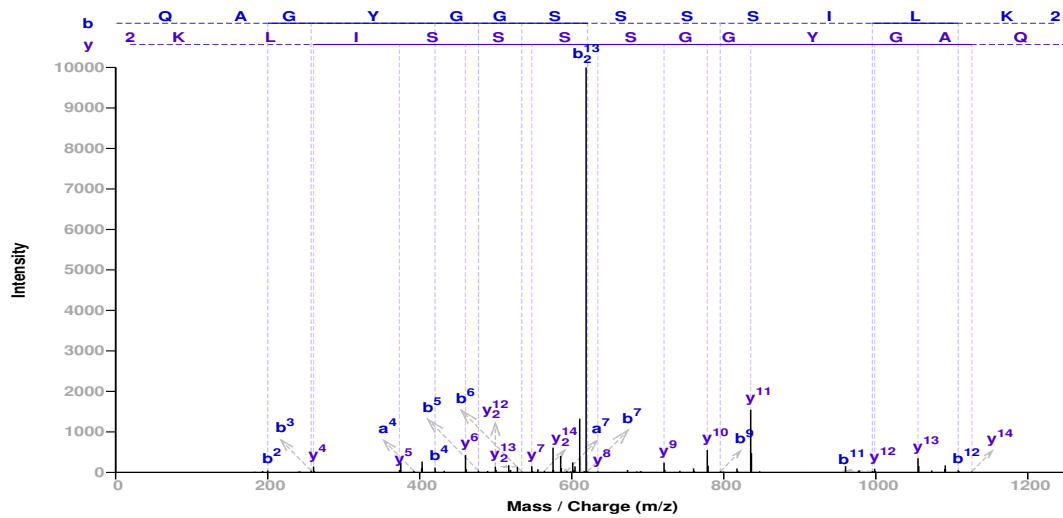

yeast2\_Scan\_Number\_2912 Precursor m/z: 612.829 cosine: 0.791  $\alpha$ : 0.814

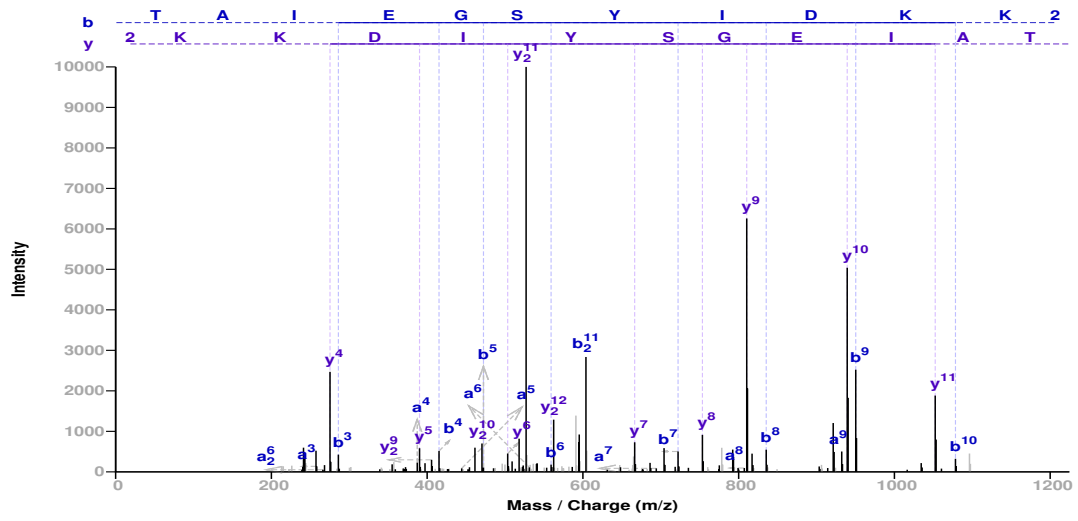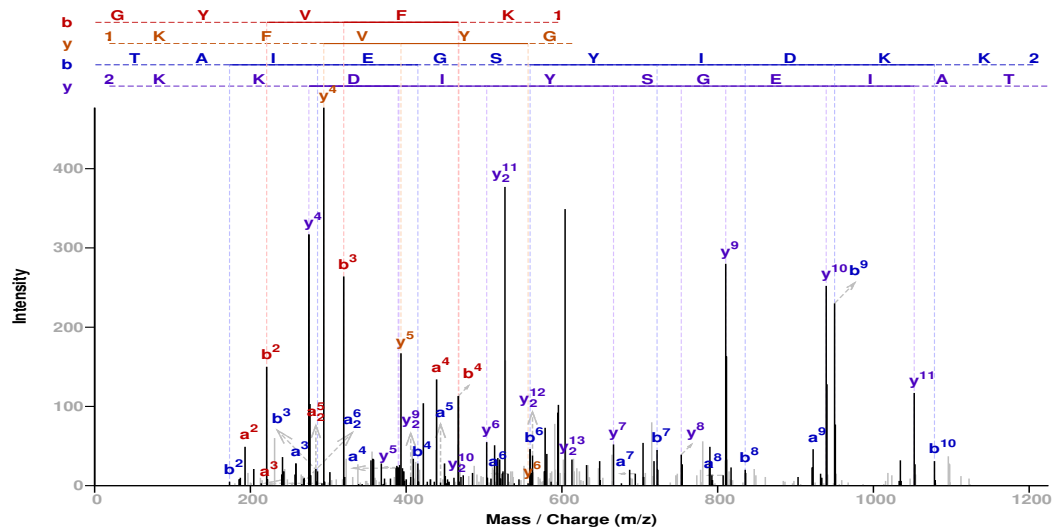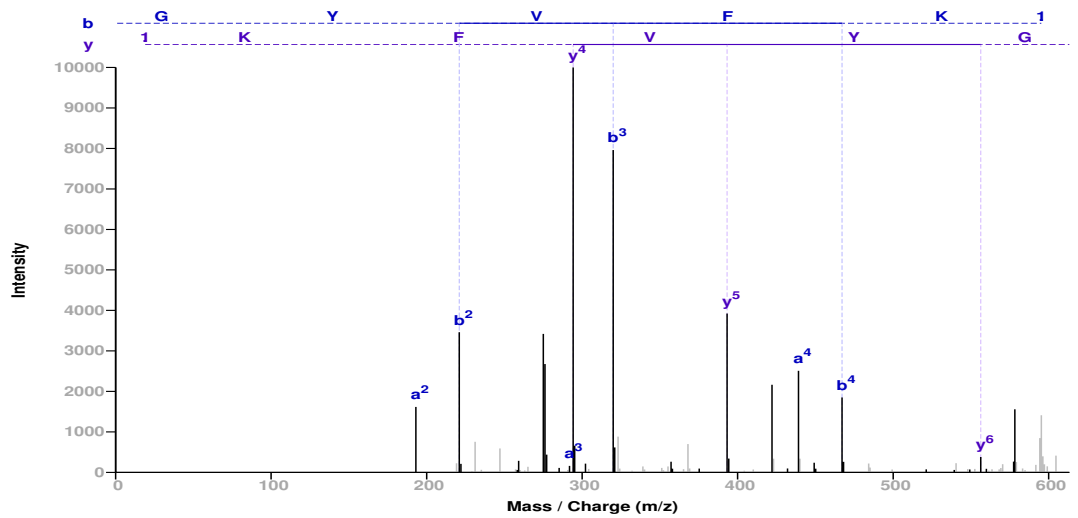



yeast2\_Scan\_Number\_3069 Precursor m/z: 518.764 cosine: 0.734  $\alpha$ : 0.810

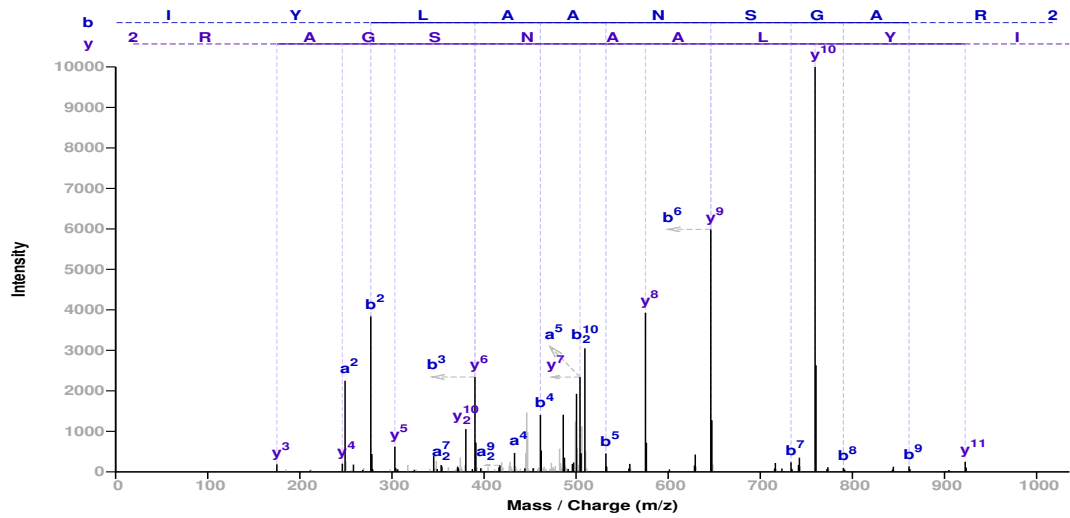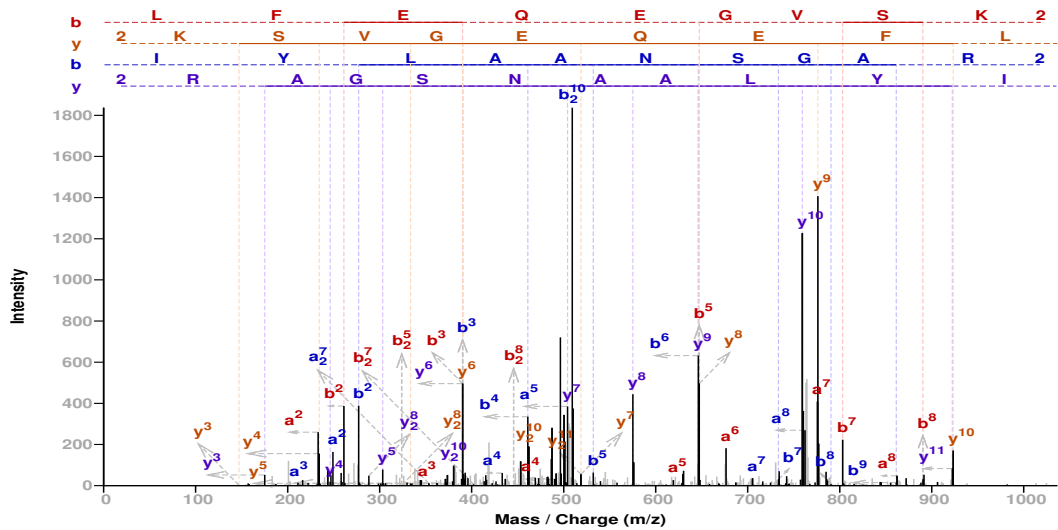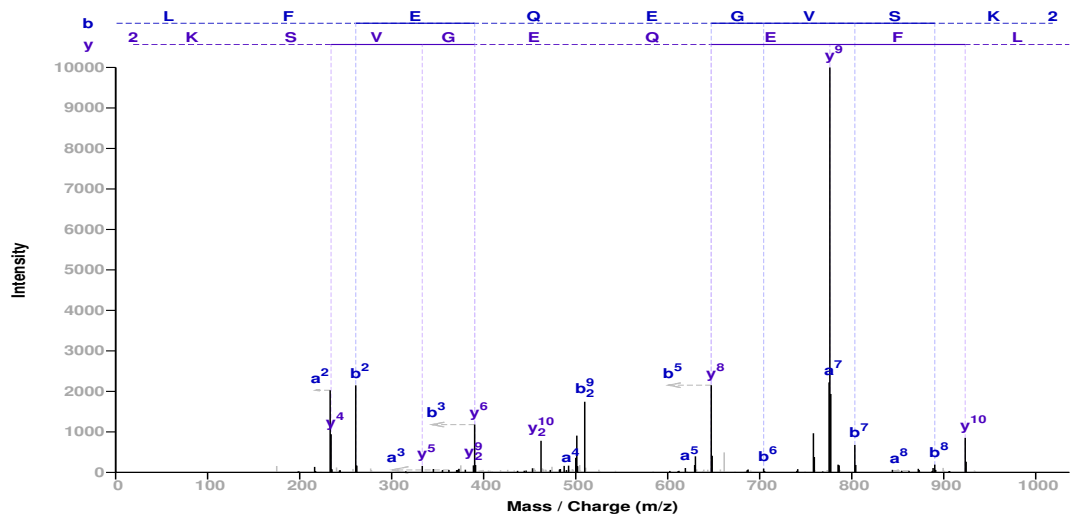

yeast2\_Scan\_Number\_4499 Precursor m/z: 485.789 cosine: 0.791  $\alpha$ : 0.801

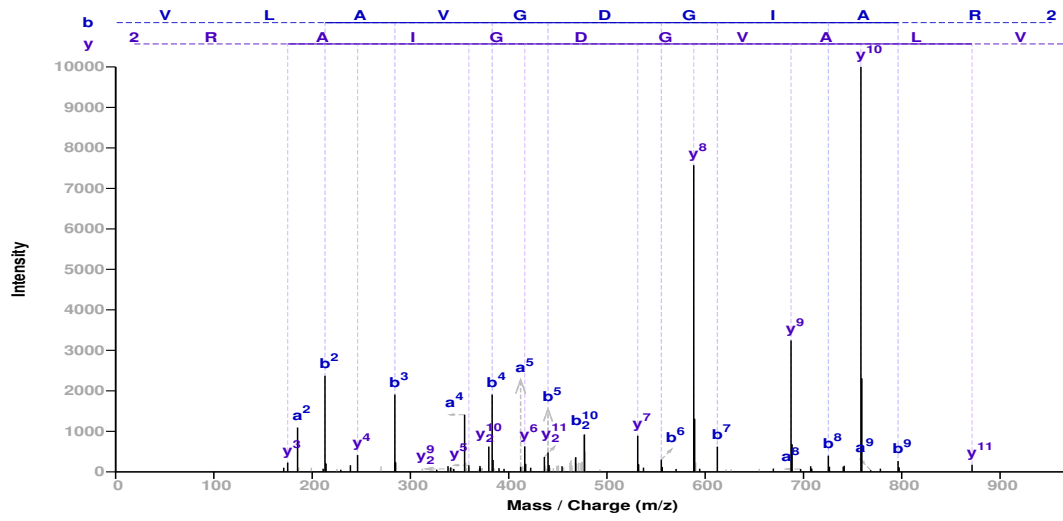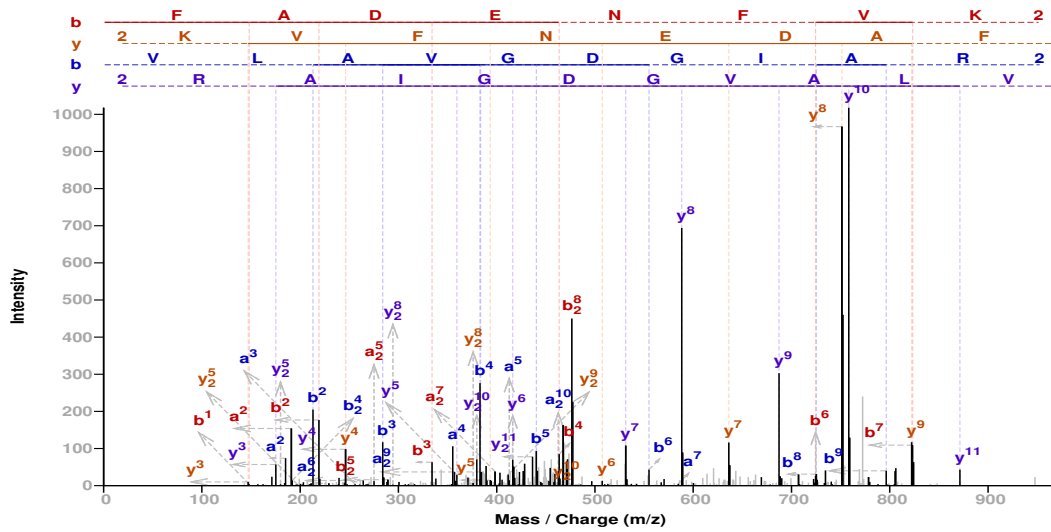

yeast2\_Scan\_Number\_5730 Precursor m/z: 602.322 cosine: 0.856  $\alpha$ : 0.797

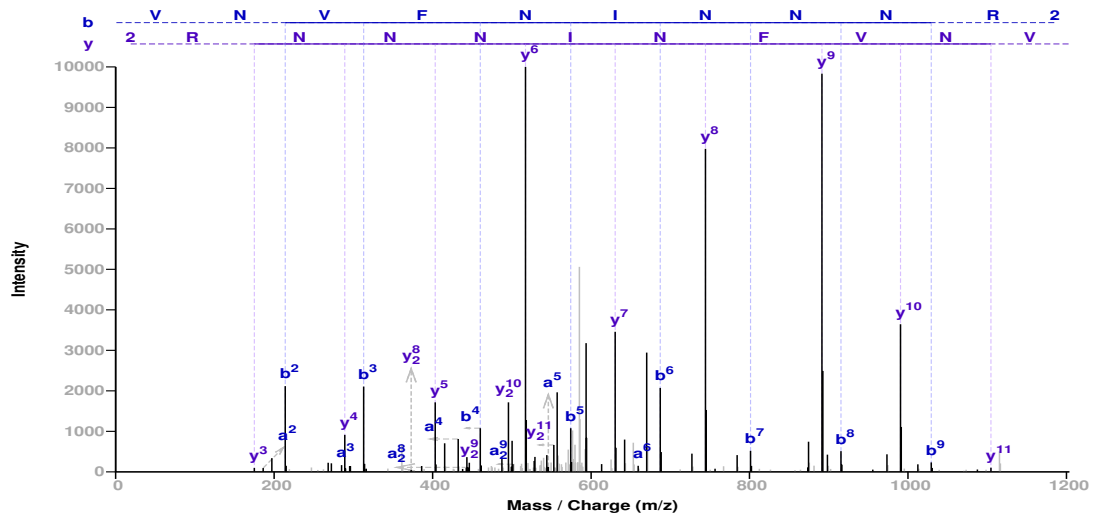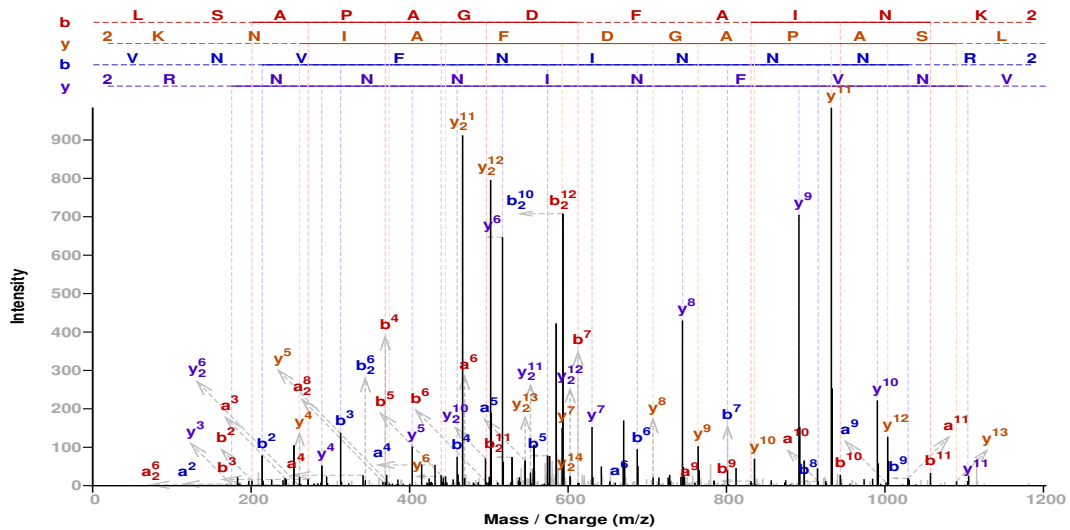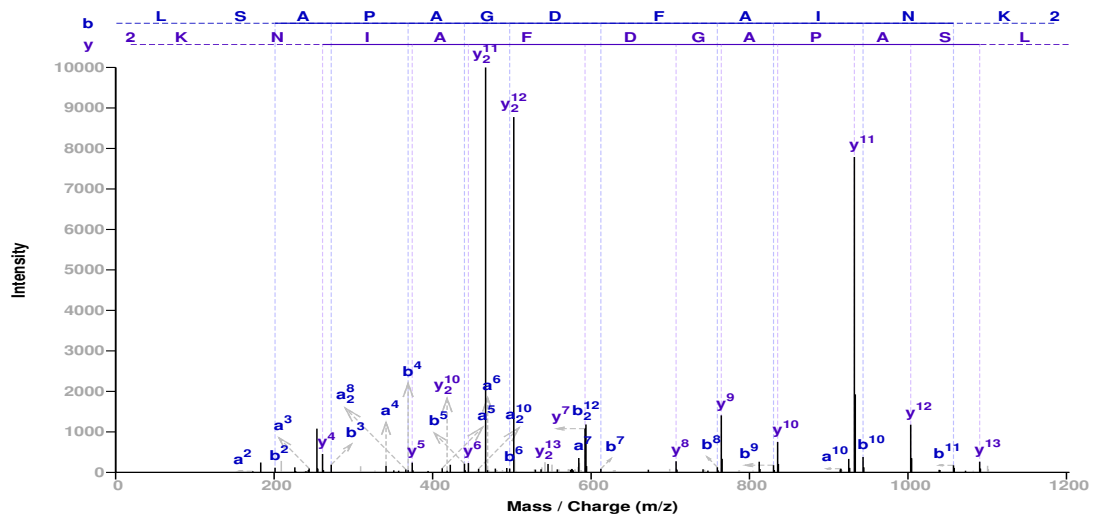

yeast2\_Scan\_Number\_3903 Precursor m/z: 468.744 cosine: 0.788  $\alpha$ : 0.791

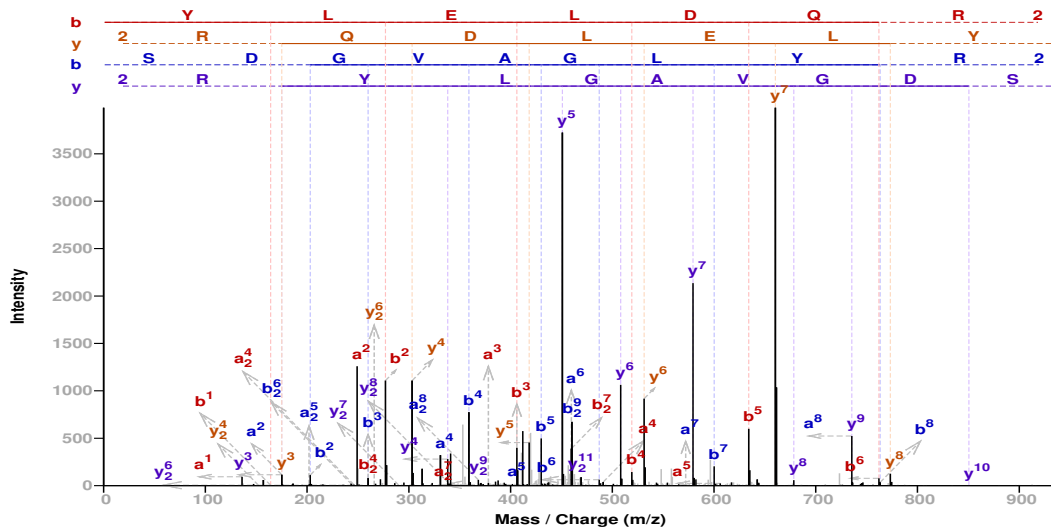

yeast2\_Scan\_Number\_3986 Precursor m/z: 619.344 cosine: 0.779  $\alpha$ : 0.790

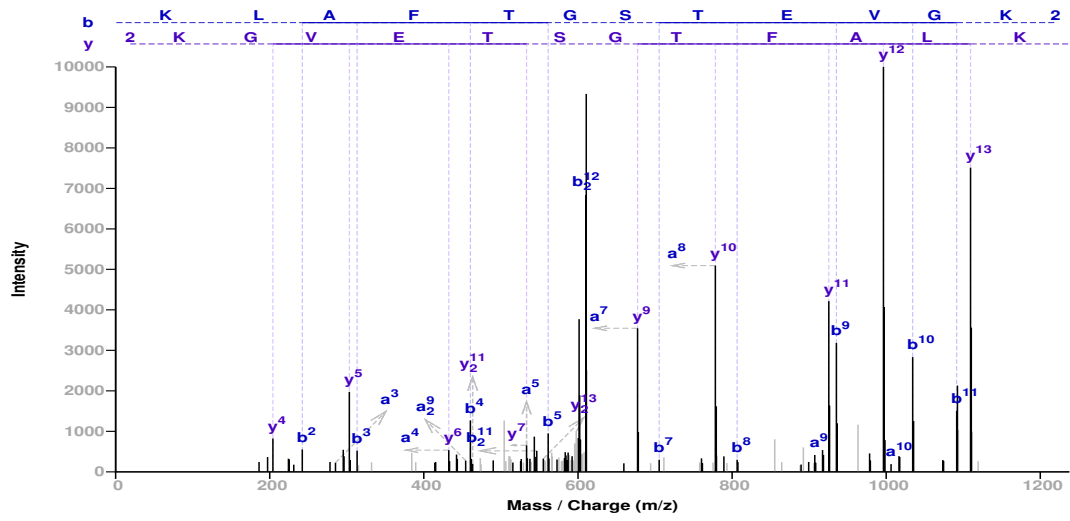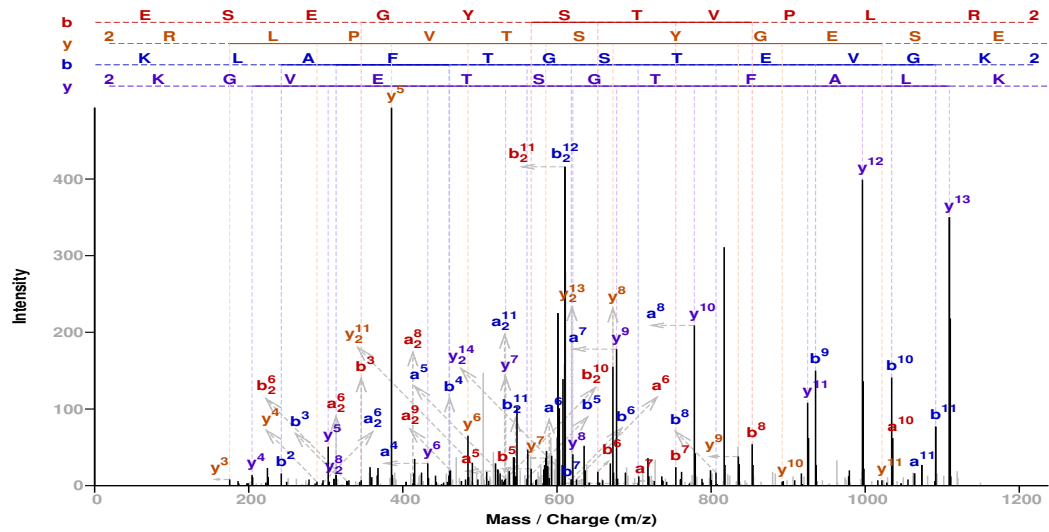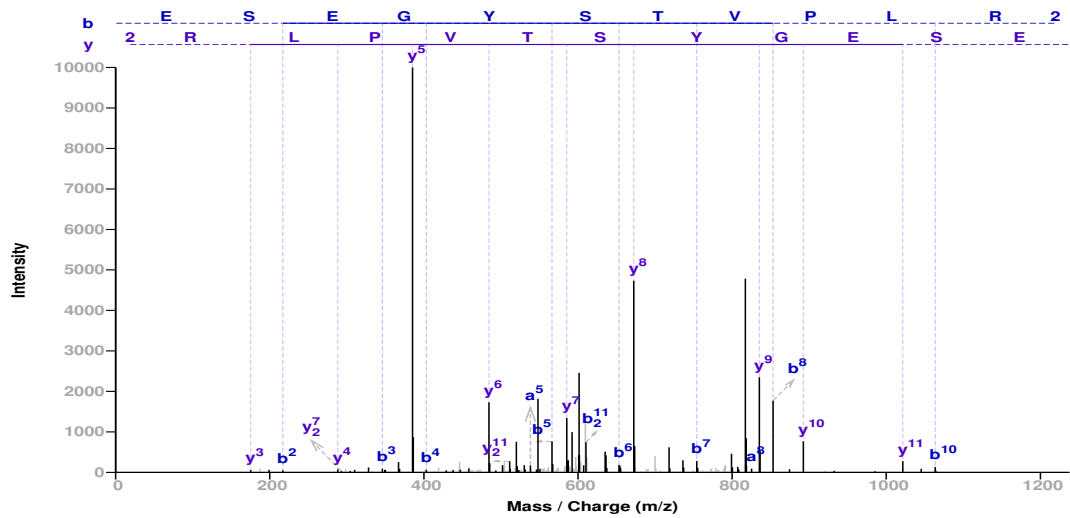

yeast2\_Scan\_Number\_5915 Precursor m/z: 471.289 cosine: 0.906  $\alpha$ : 0.781

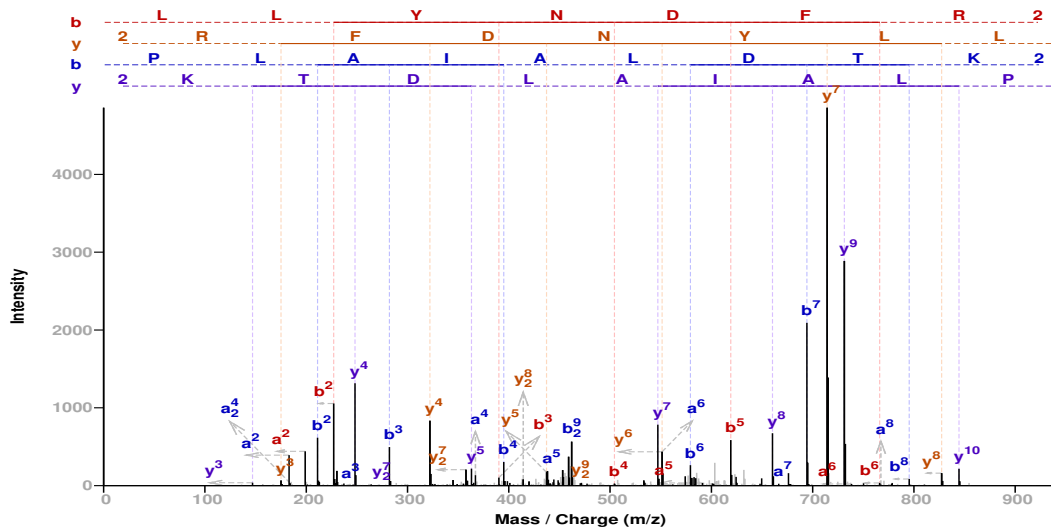

yeast2\_Scan\_Number\_3870 Precursor m/z: 414.754 cosine: 0.845  $\alpha$ : 0.780

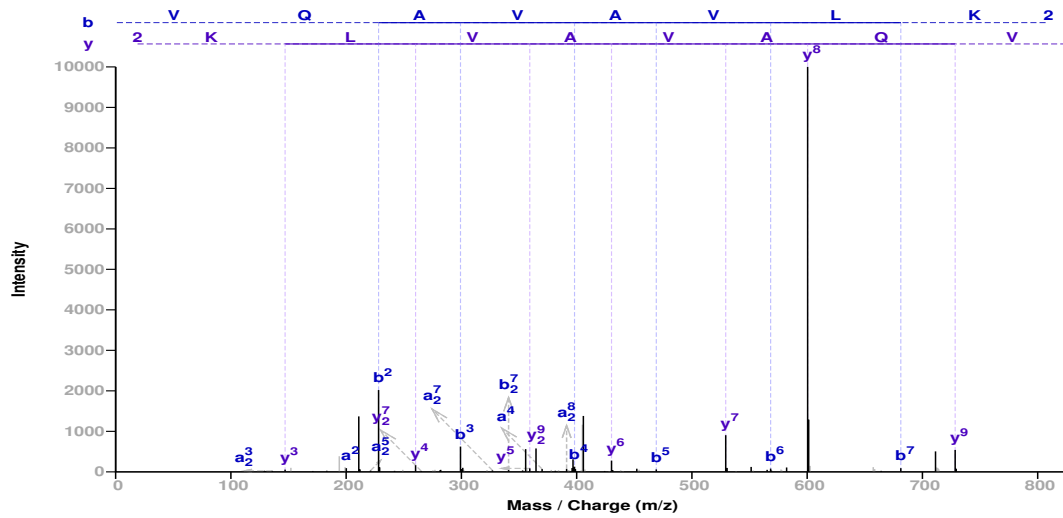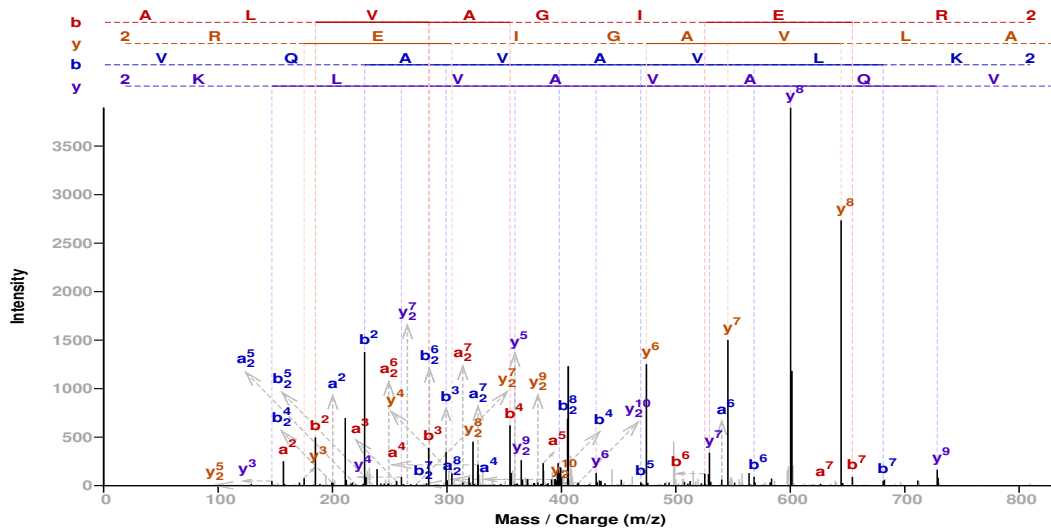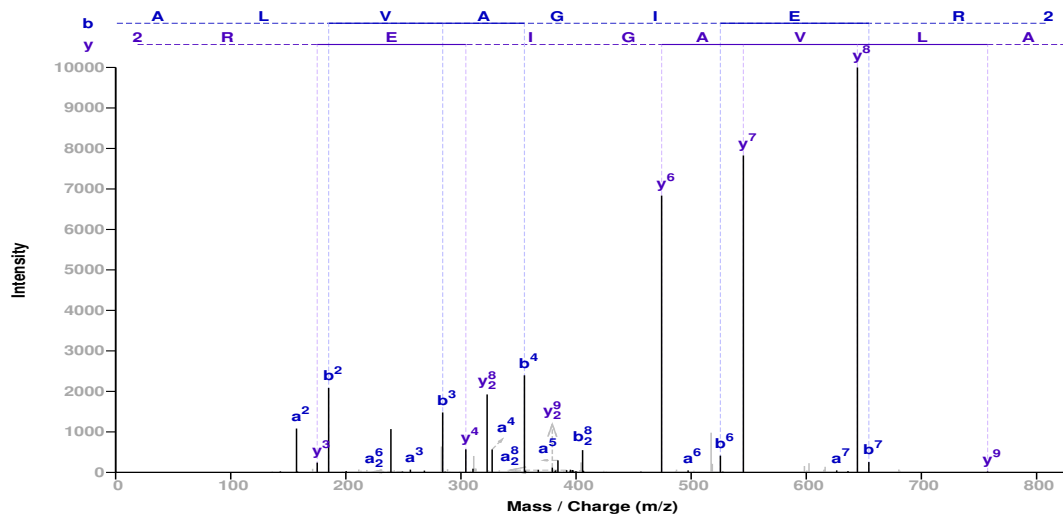

yeast2\_Scan\_Number\_7770 Precursor m/z: 599.320 cosine: 0.764  $\alpha$ : 0.772

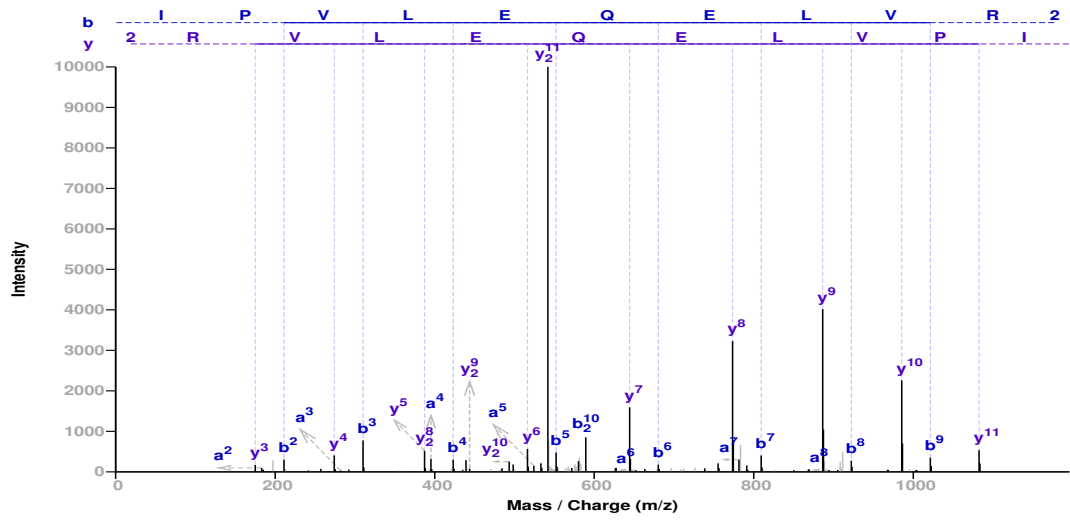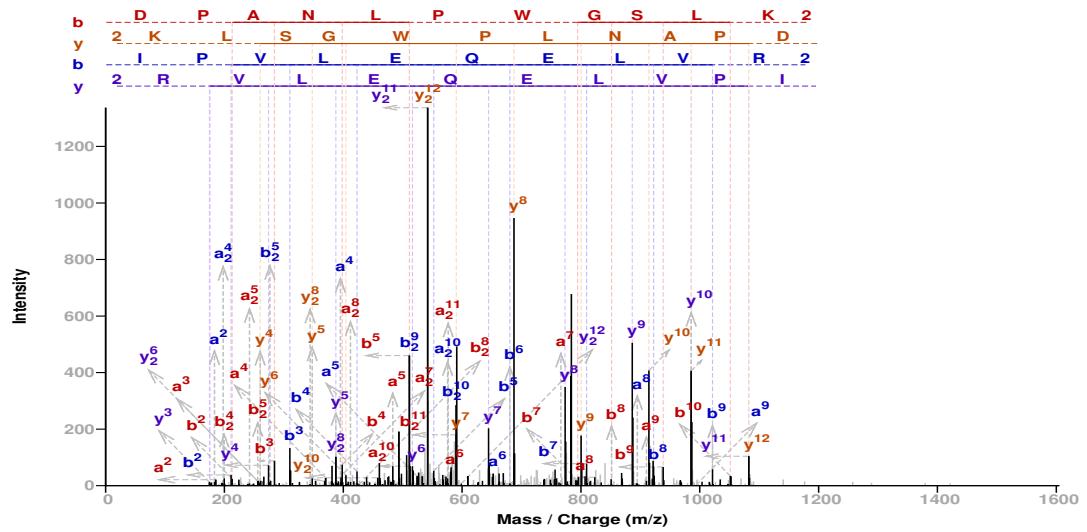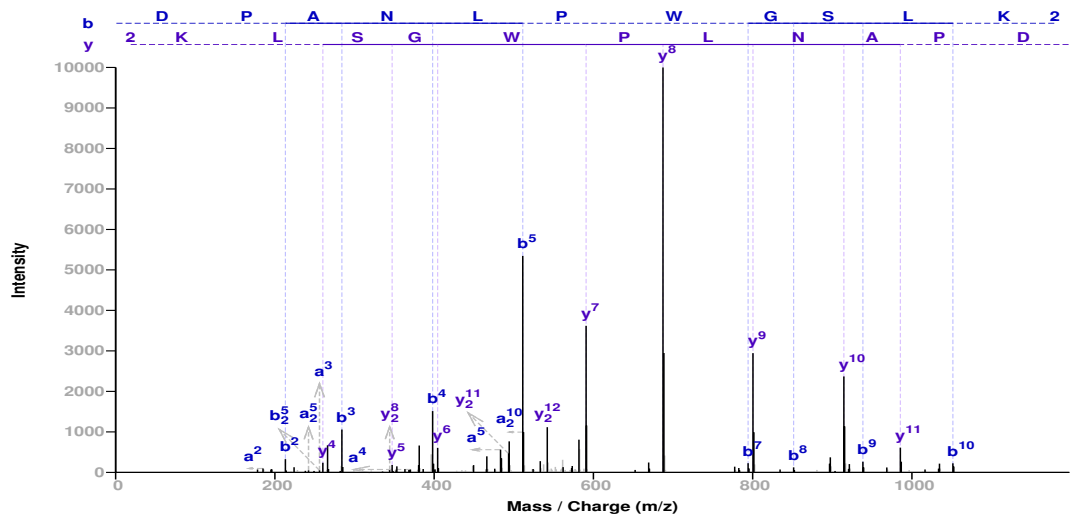



yeast2\_Scan\_Number\_3496 Precursor m/z: 452.741 cosine: 0.886  $\alpha$ : 0.758

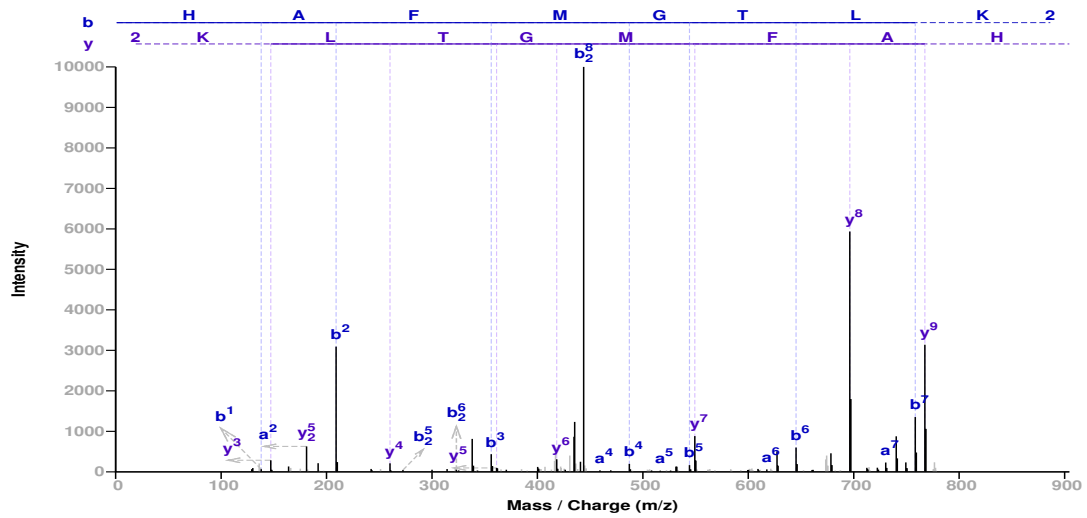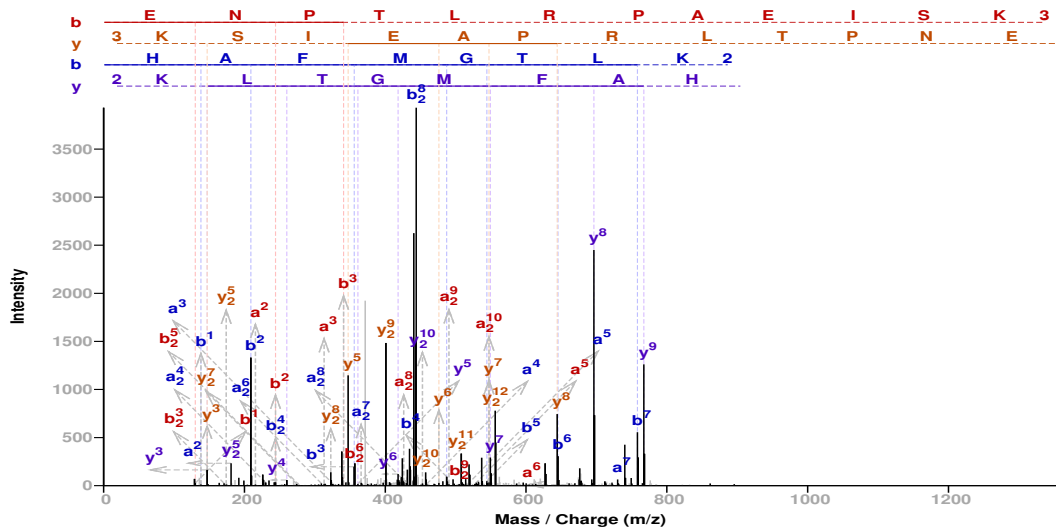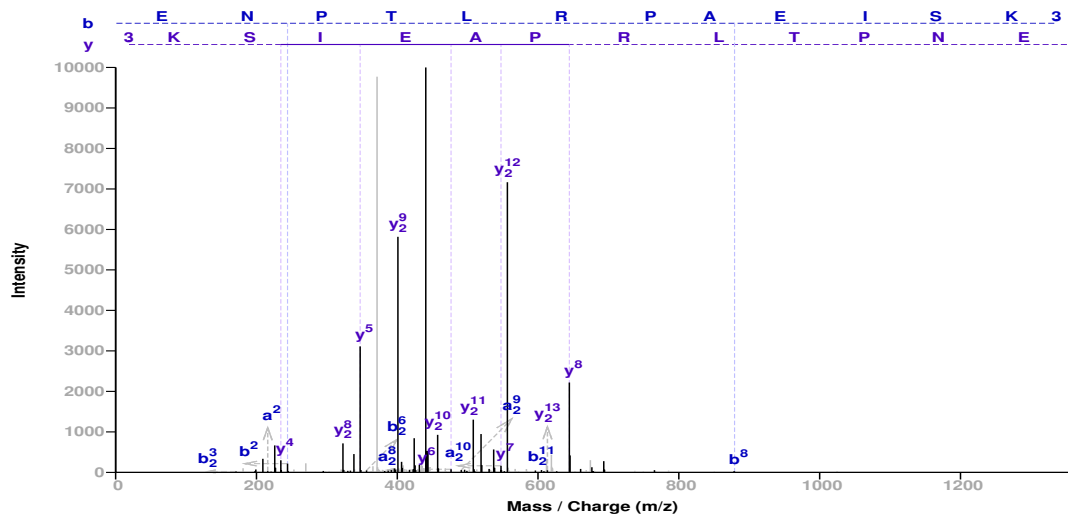

yeast2\_Scan\_Number\_3745 Precursor m/z: 400.258 cosine: 0.780  $\alpha$ : 0.758

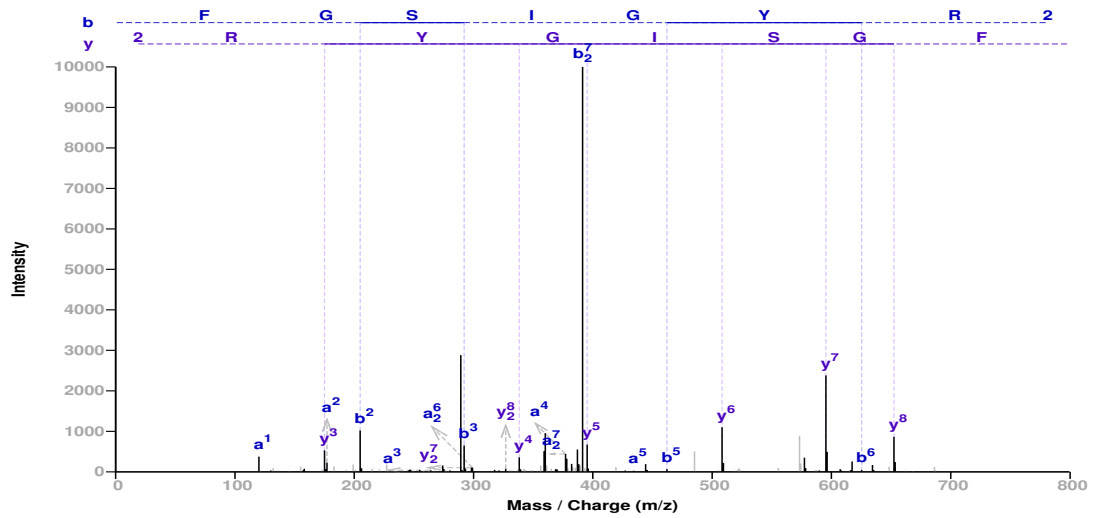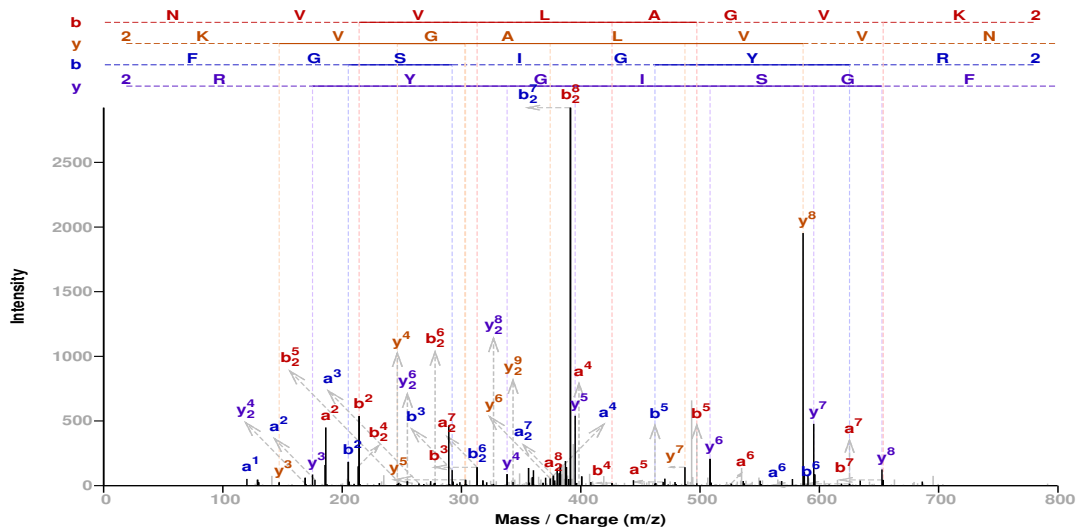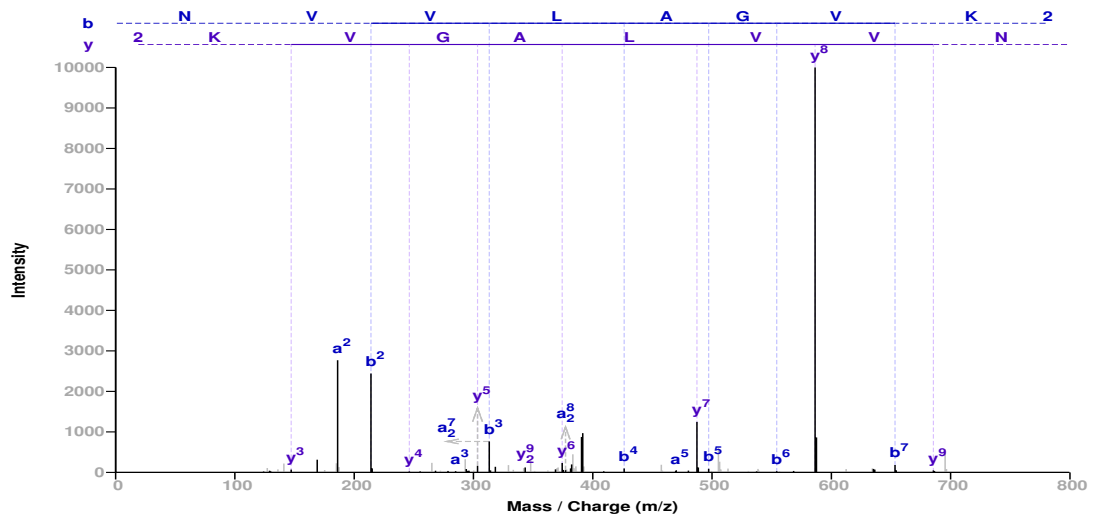



yeast2\_Scan\_Number\_4982 Precursor m/z: 488.271 cosine: 0.742  $\alpha$ : 0.751

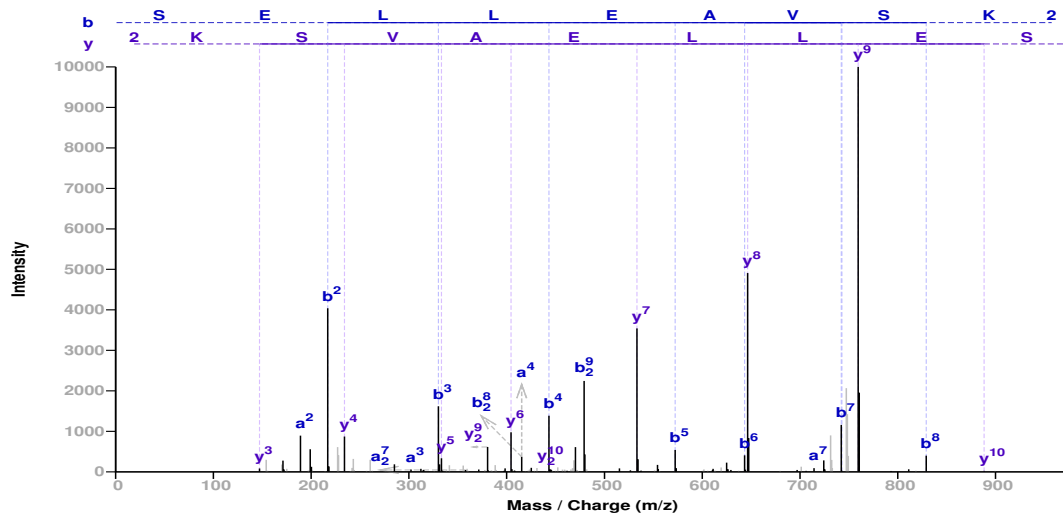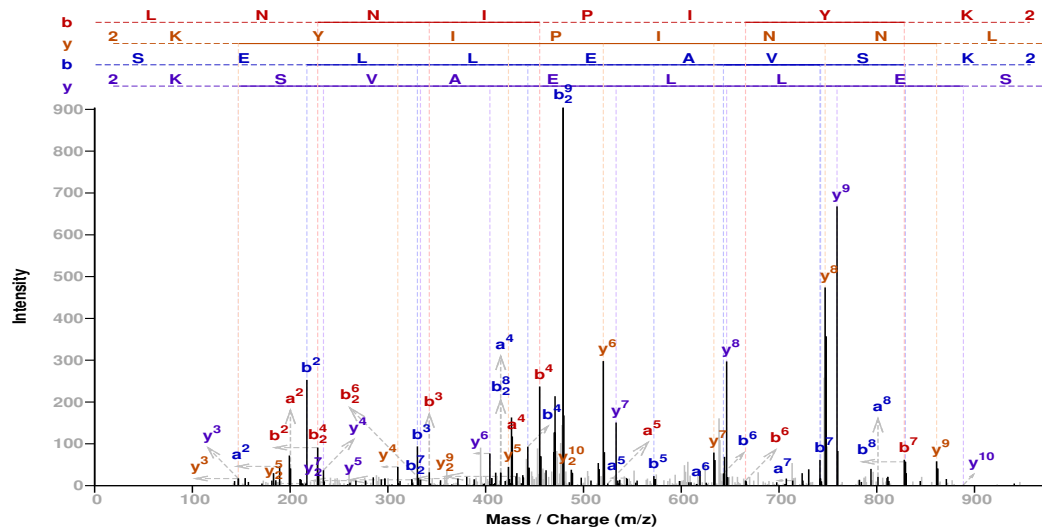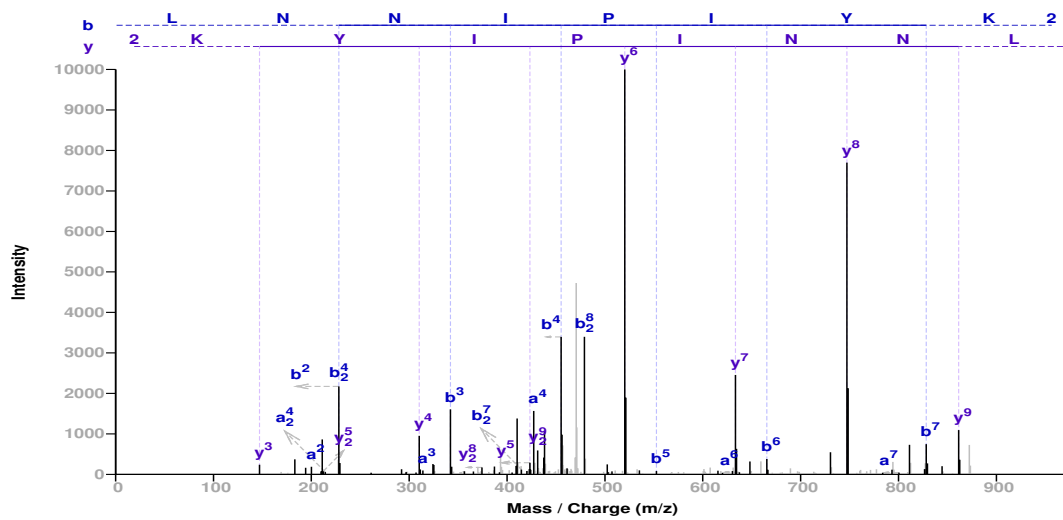

yeast2\_Scan\_Number\_4058 Precursor m/z: 584.773 cosine: 0.794  $\alpha$ : 0.742

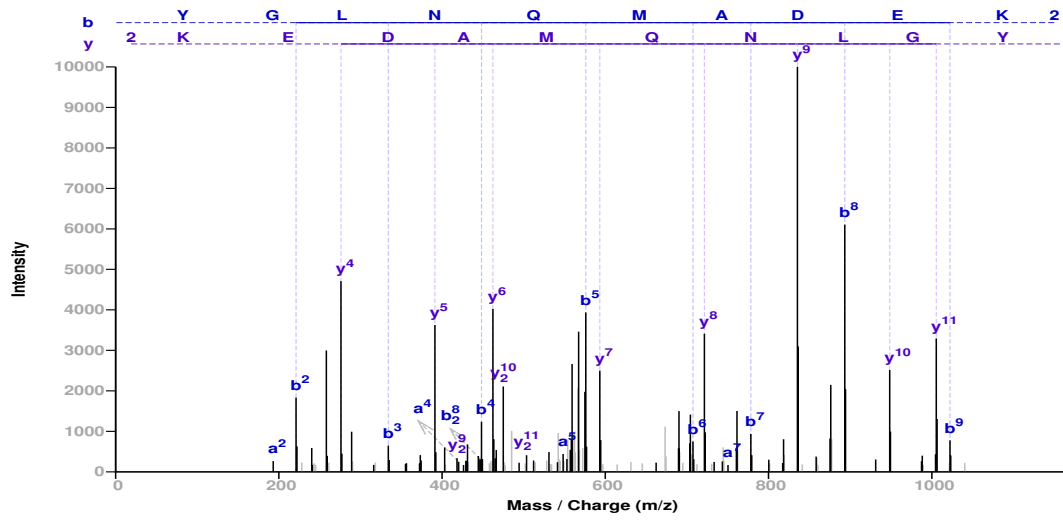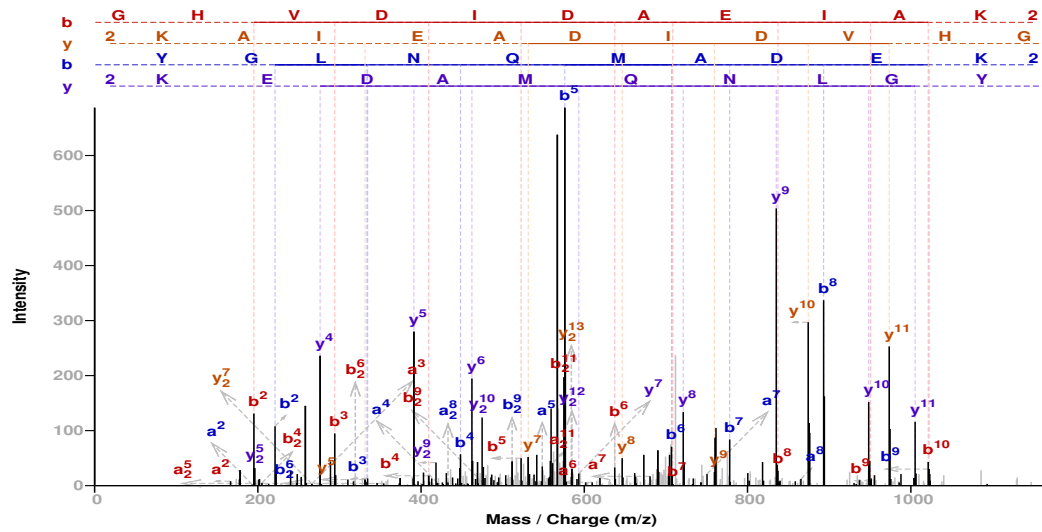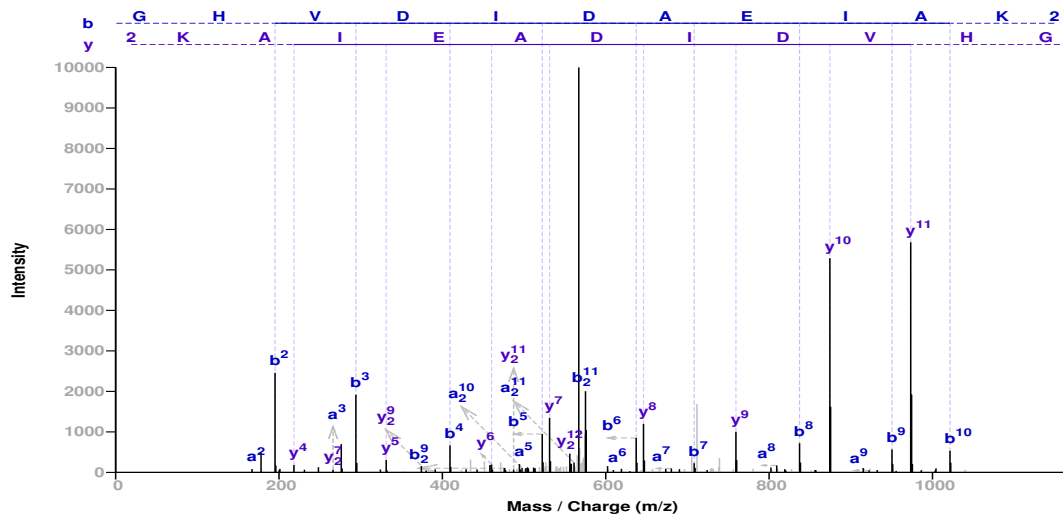

yeast2\_Scan\_Number\_3457 Precursor m/z: 520.618 cosine: 0.769  $\alpha$ : 0.734

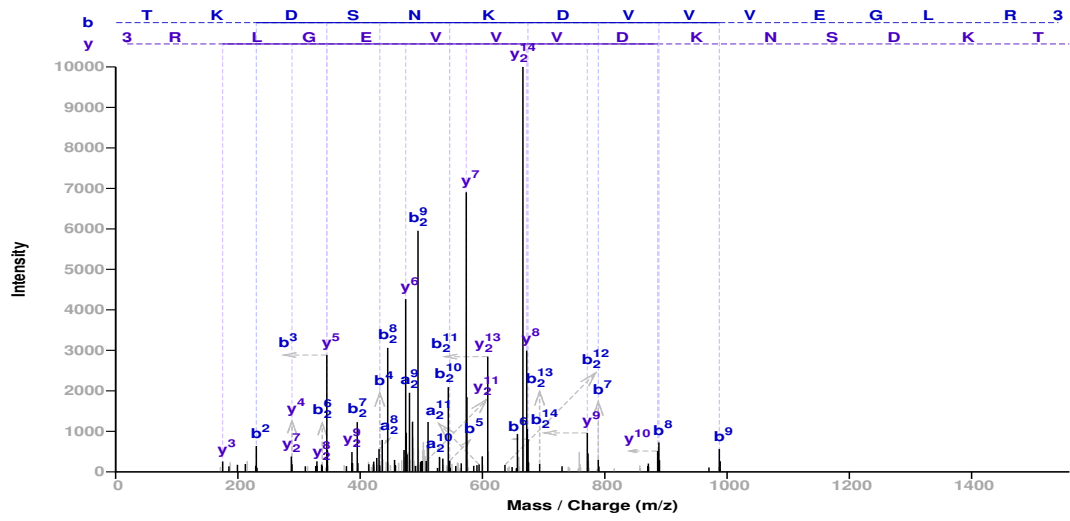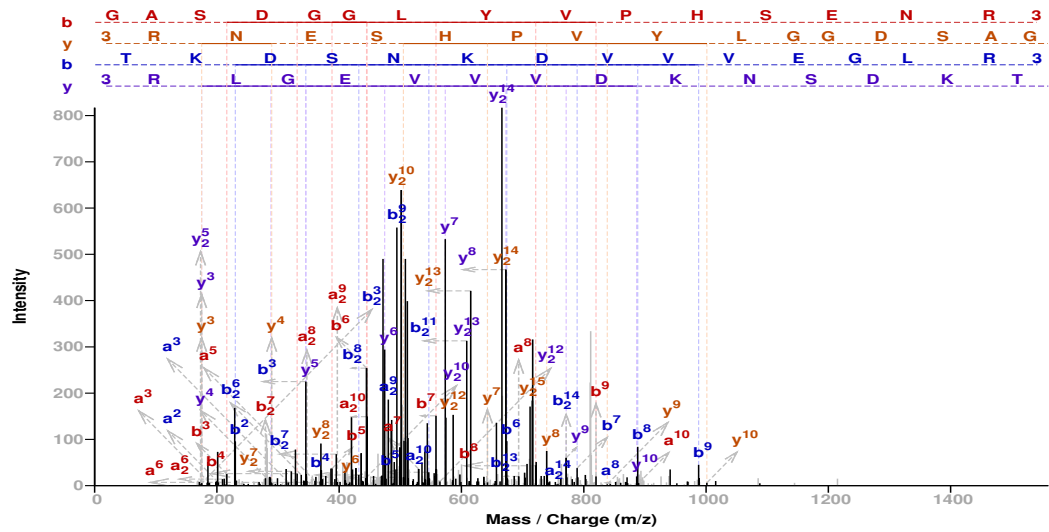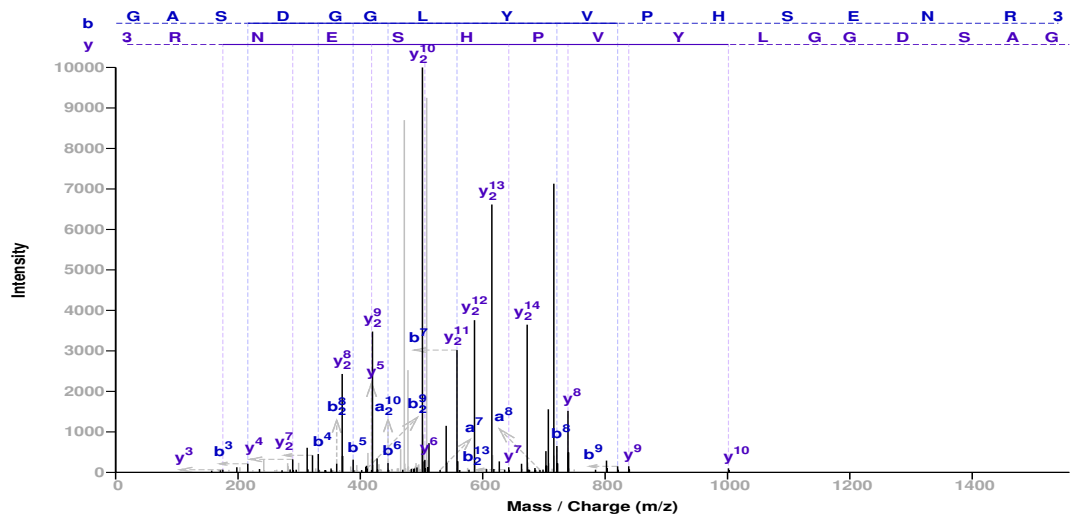

yeast2\_Scan\_Number\_5640 Precursor m/z: 694.866 cosine: 0.829  $\alpha$ : 0.728

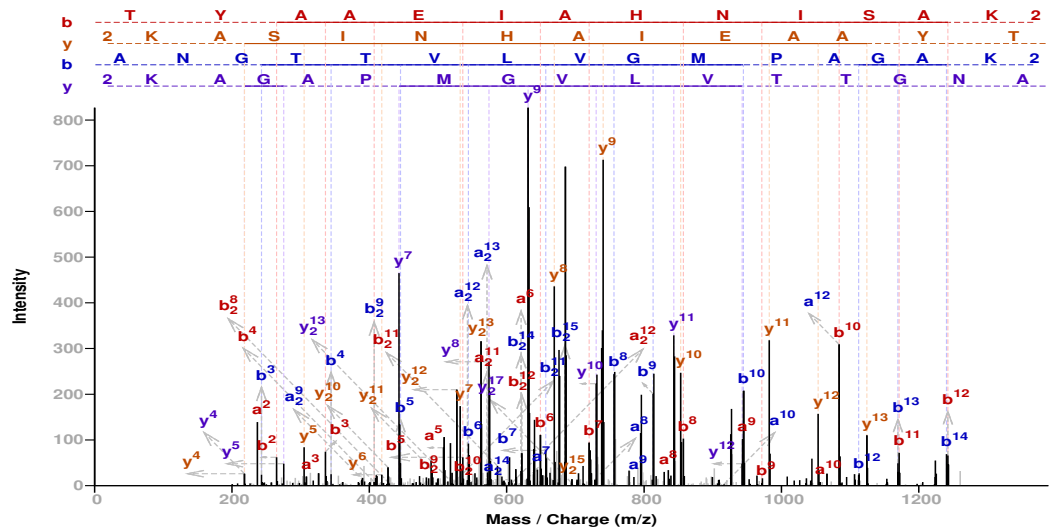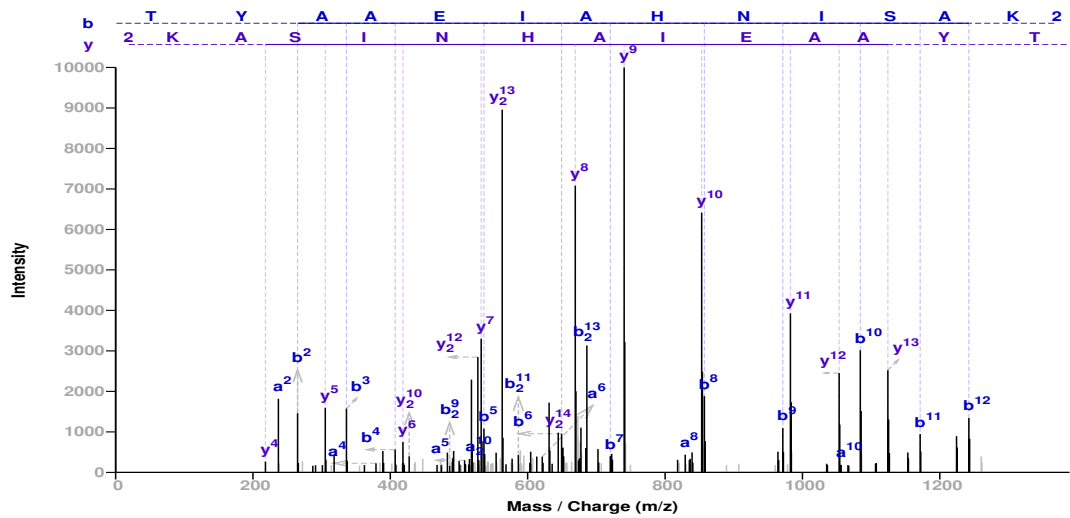

yeast2\_Scan\_Number\_544 Precursor m/z: 420.712 cosine: 0.799  $\alpha$ : 0.712

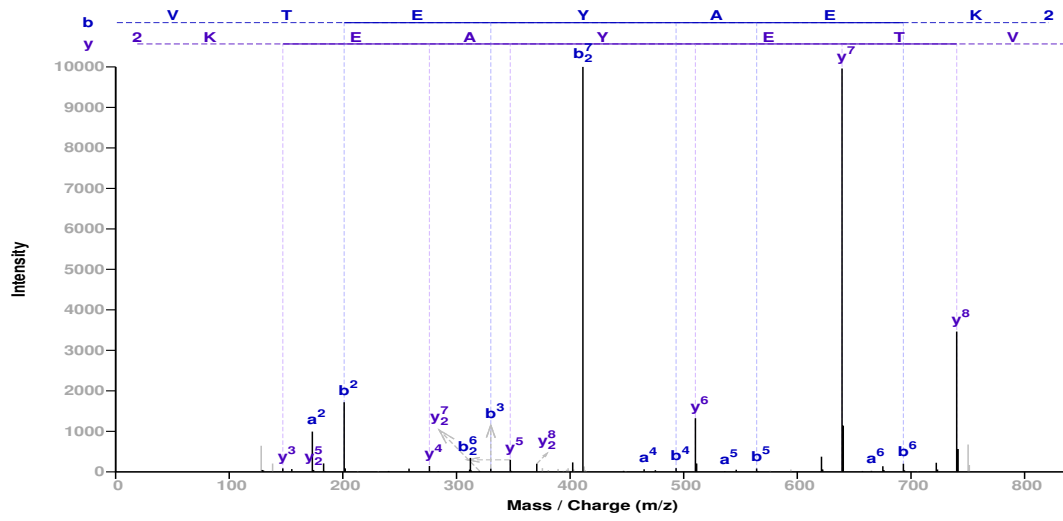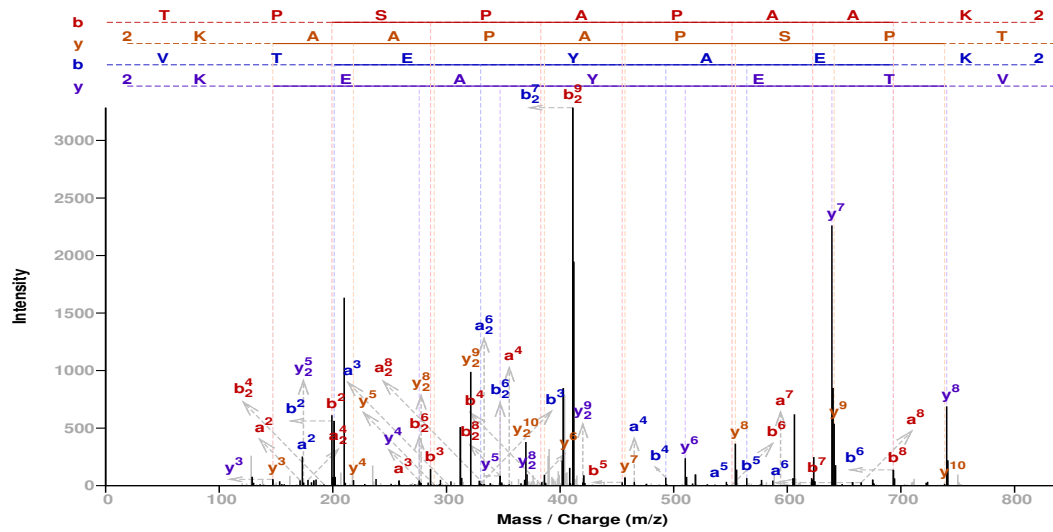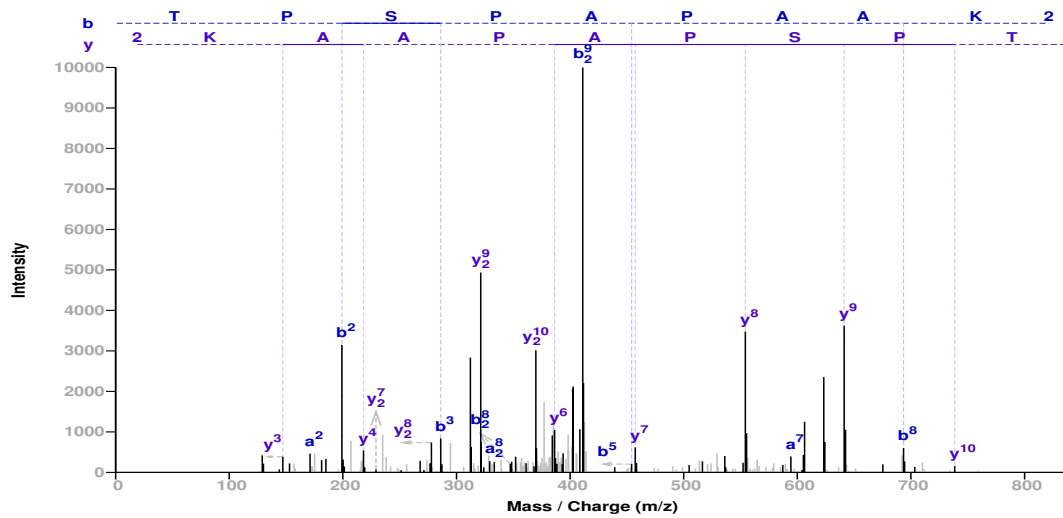





yeast2.Scan\_Number.1218 Precursor m/z: 459.706 cosine: 0.764  $\alpha$ : 0.706

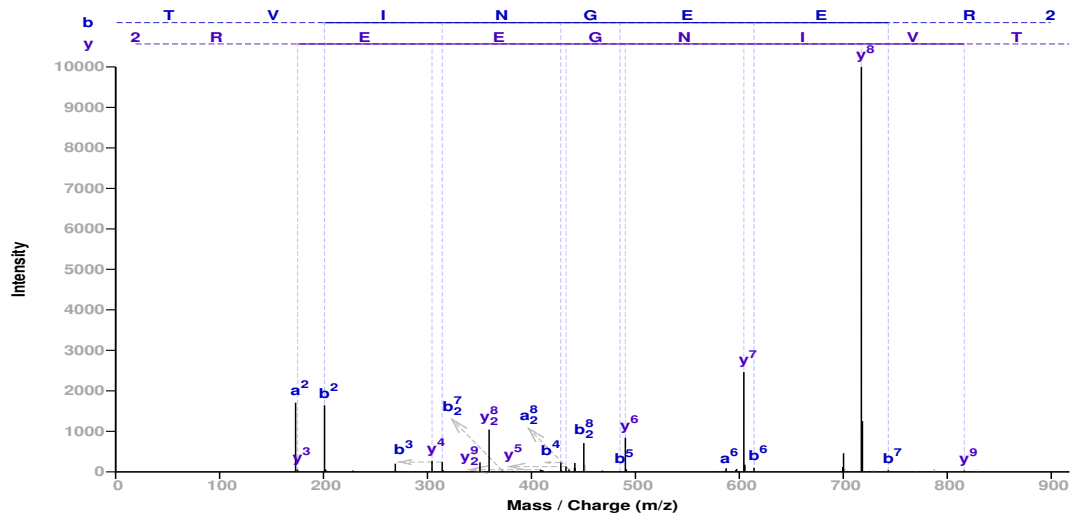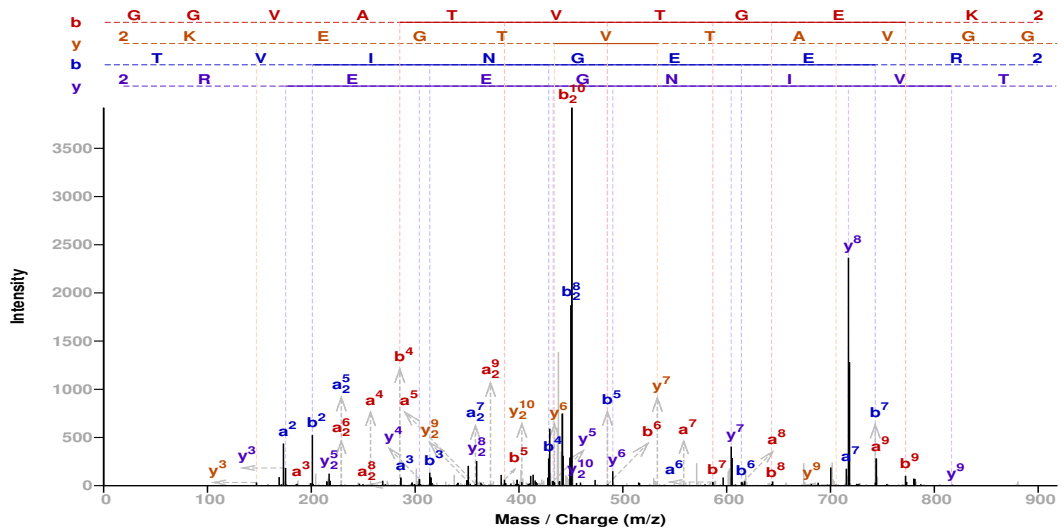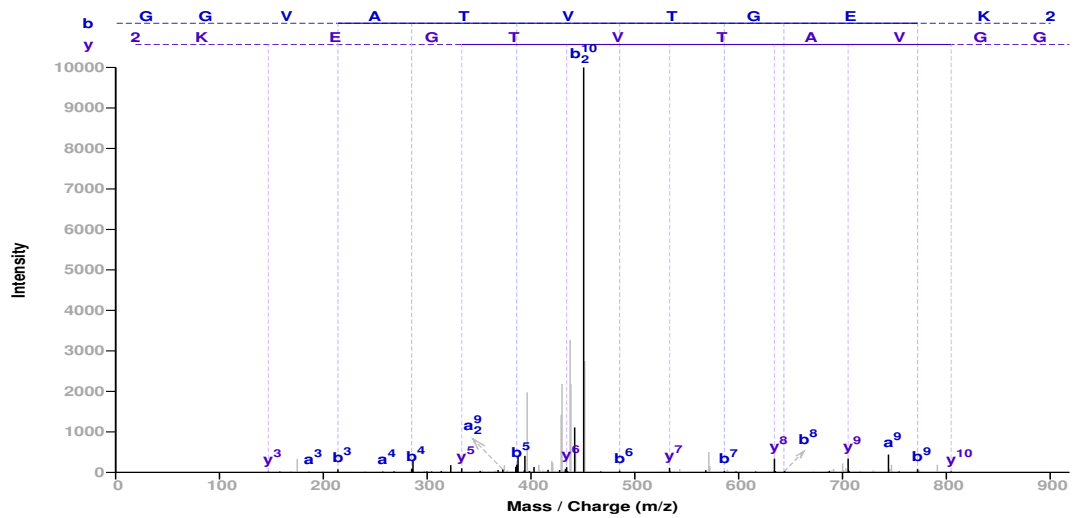

yeast2\_Scan\_Number\_5009 Precursor m/z: 678.318 cosine: 0.798  $\alpha$ : 0.705

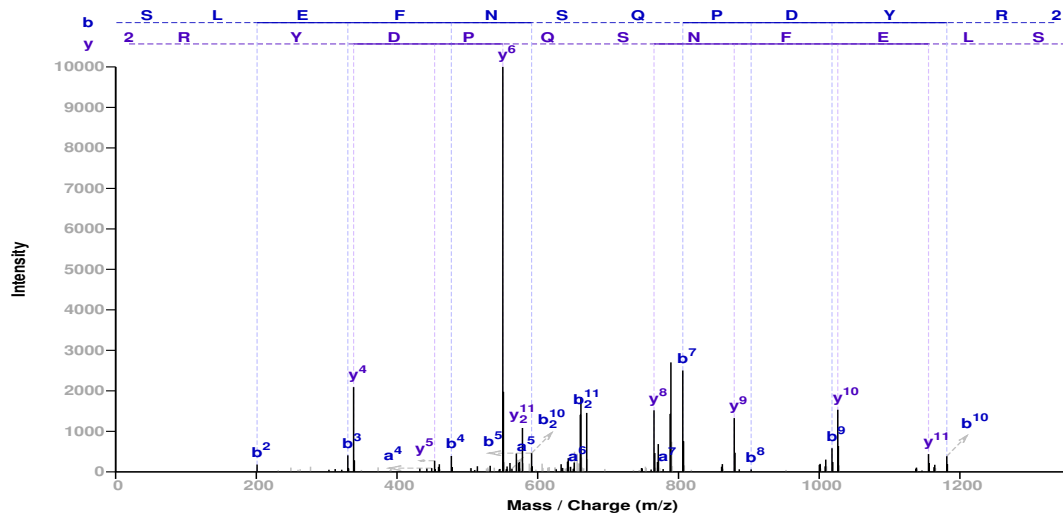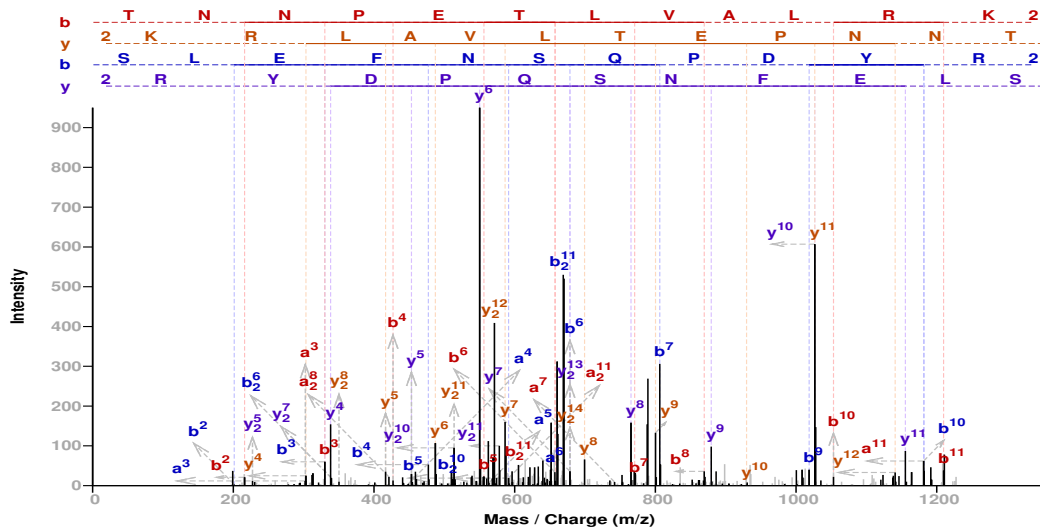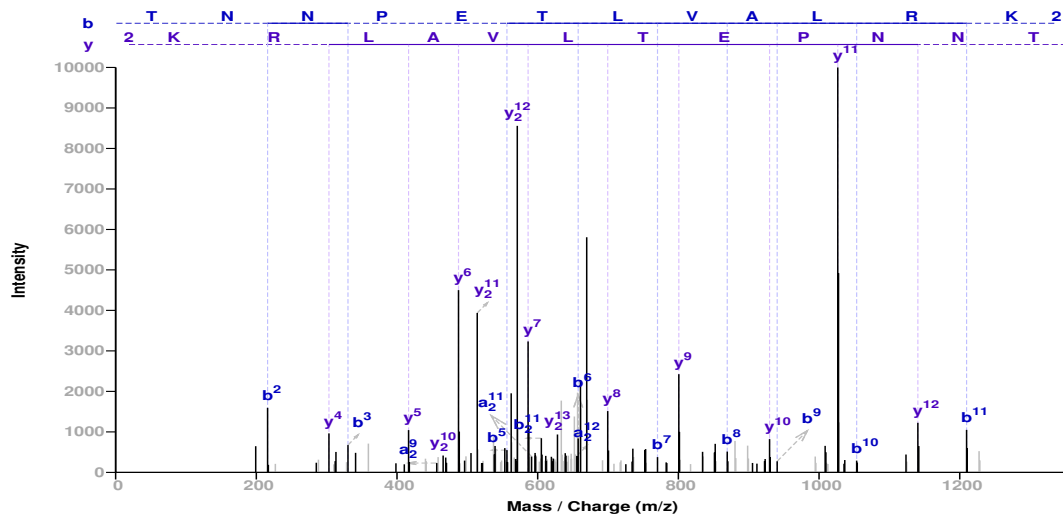

yeast2\_Scan\_Number\_7291 Precursor m/z: 482.269 cosine: 0.774  $\alpha$ : 0.694

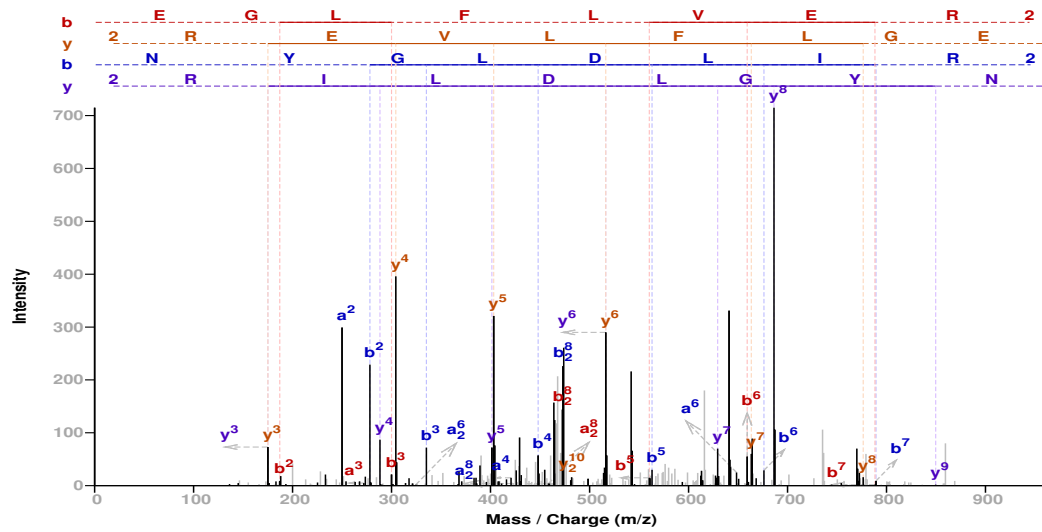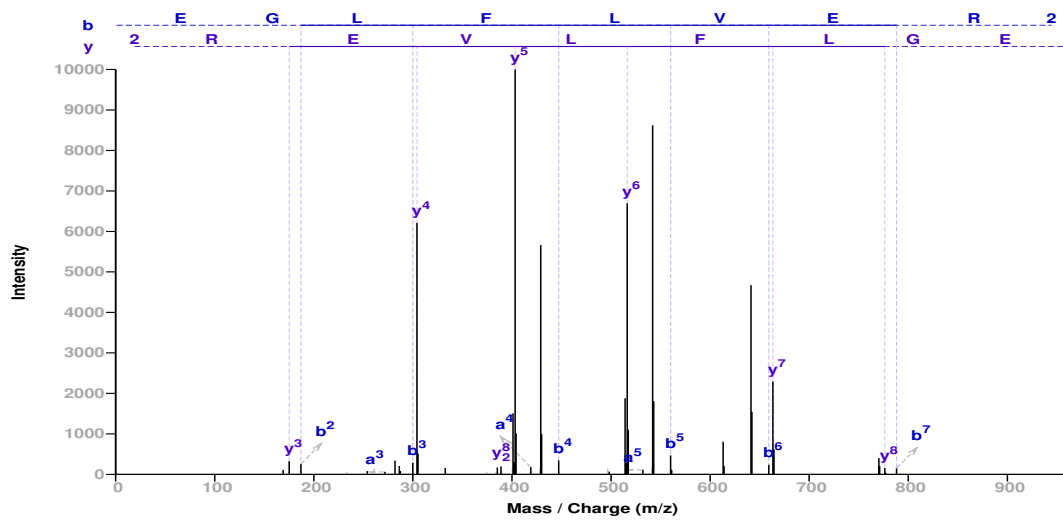

yeast2\_Scan\_Number\_7384 Precursor m/z: 594.818 cosine: 0.767  $\alpha$ : 0.693

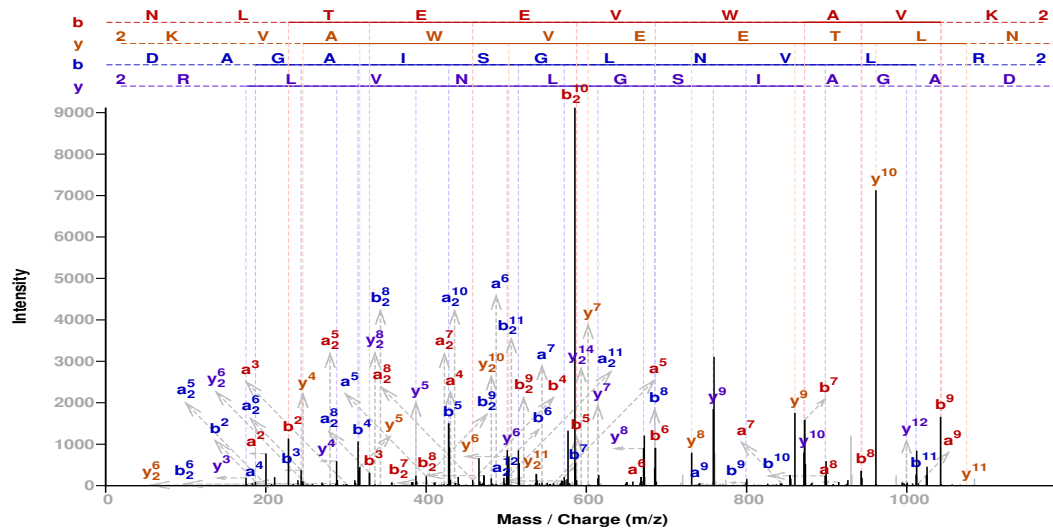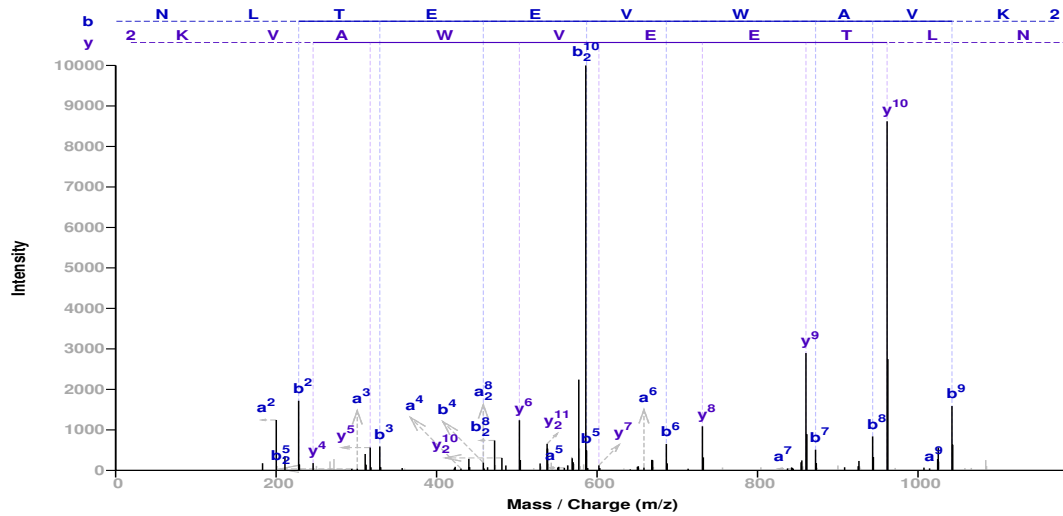

yeast2\_Scan\_Number\_2831 Precursor m/z: 530.314 cosine: 0.733  $\alpha$ : 0.683

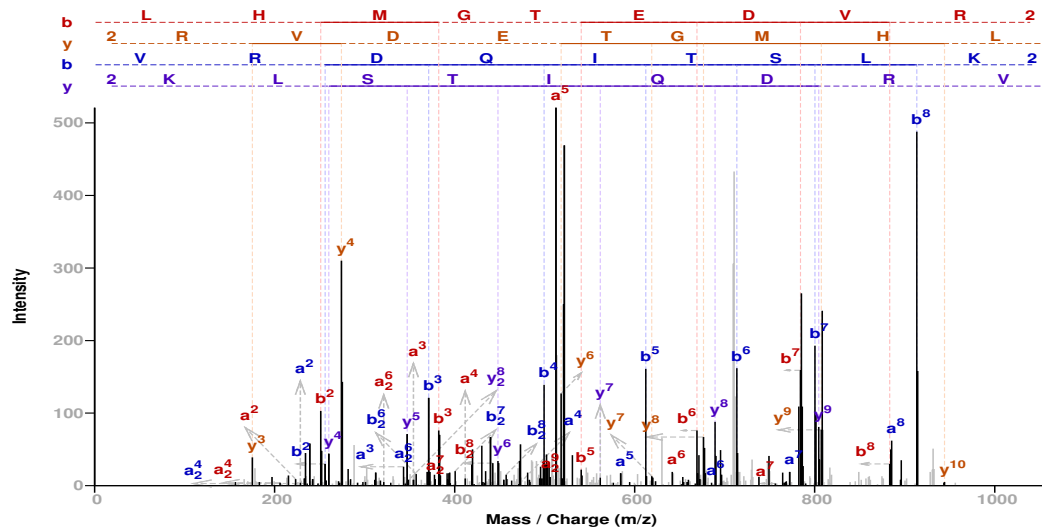

yeast2\_Scan\_Number\_4556 Precursor m/z: 611.778 cosine: 0.774  $\alpha$ : 0.674

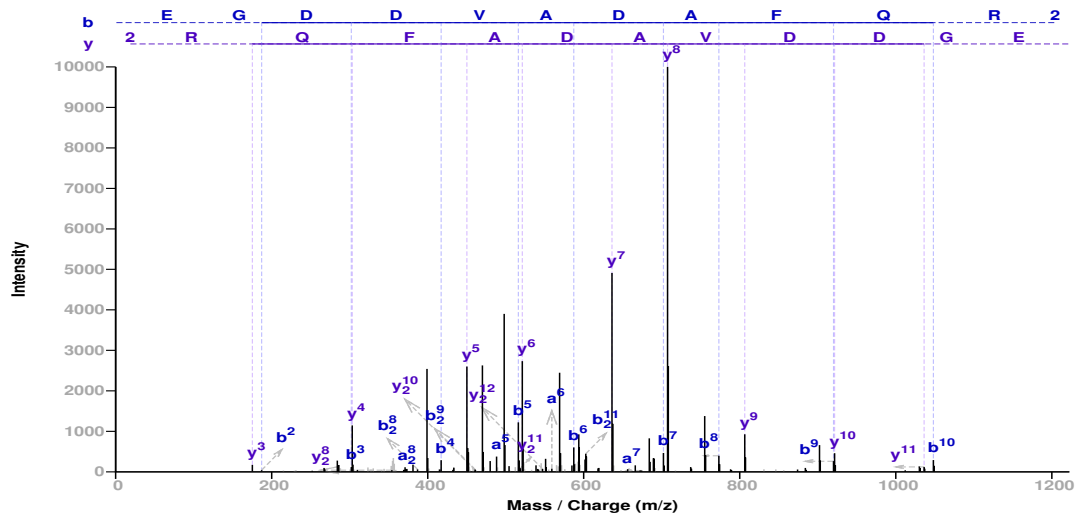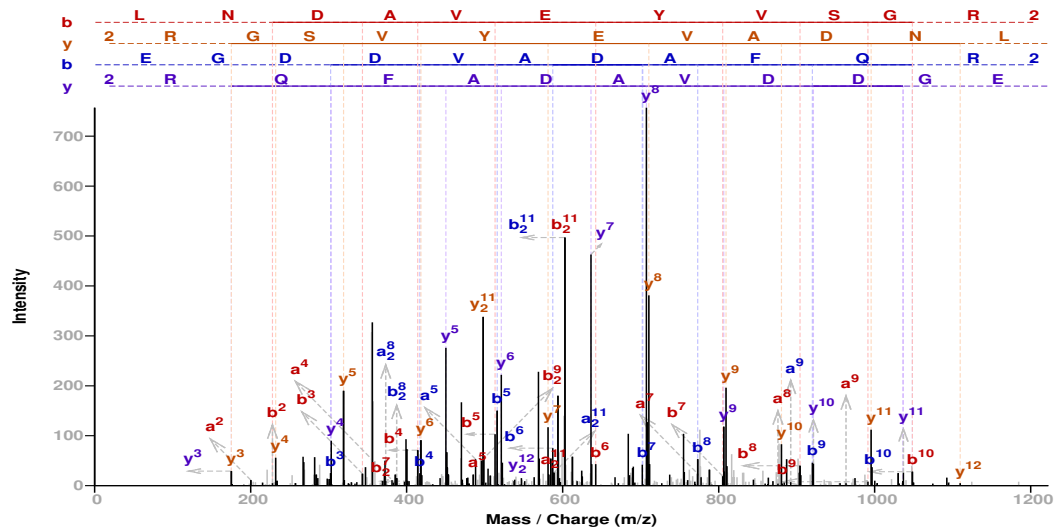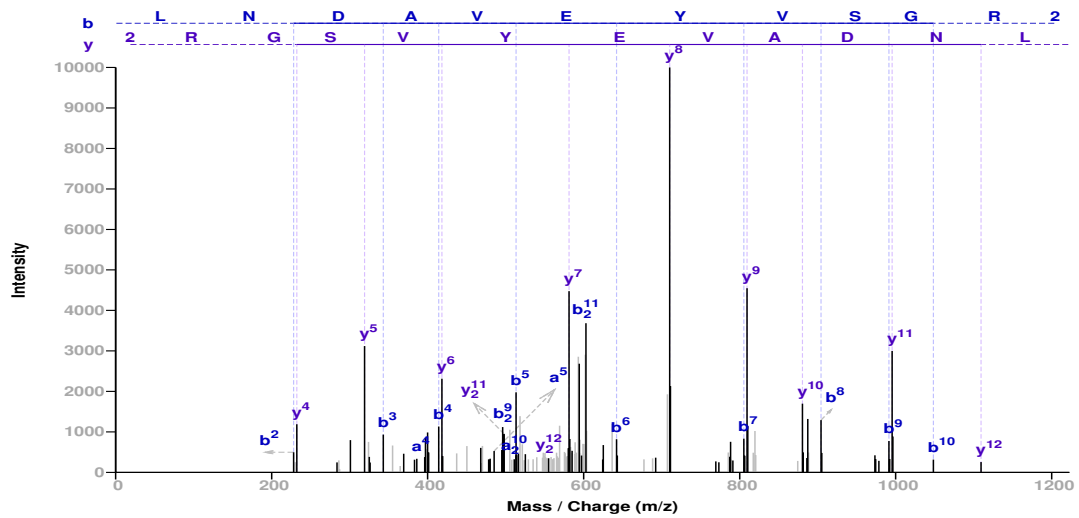

yeast2.Scan\_Number\_7345 Precursor m/z: 614.339 cosine: 0.853  $\alpha$ : 0.673

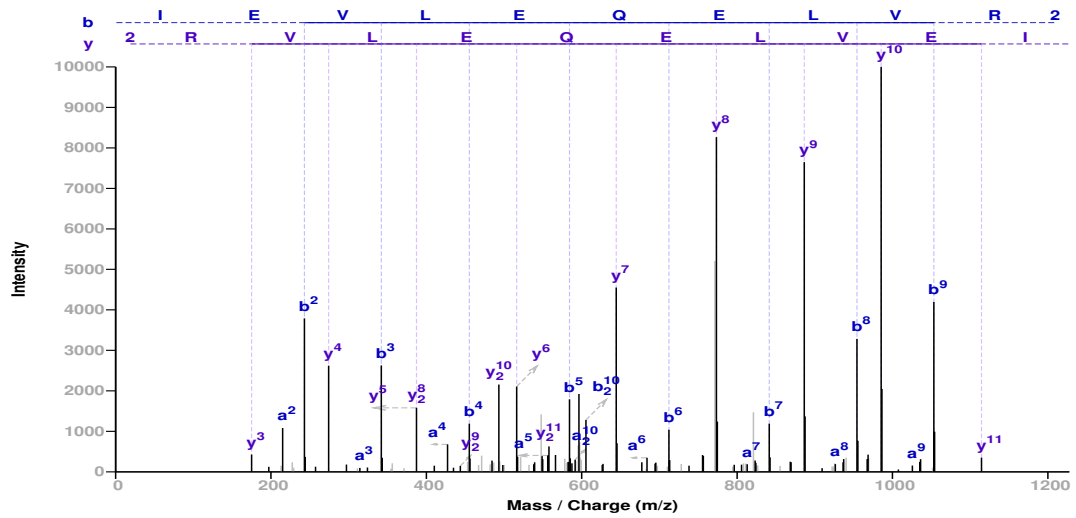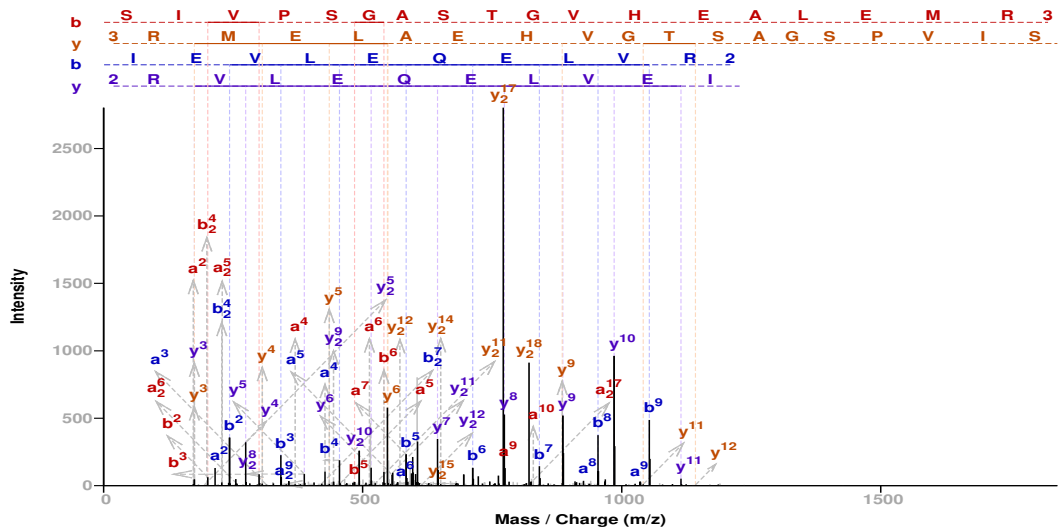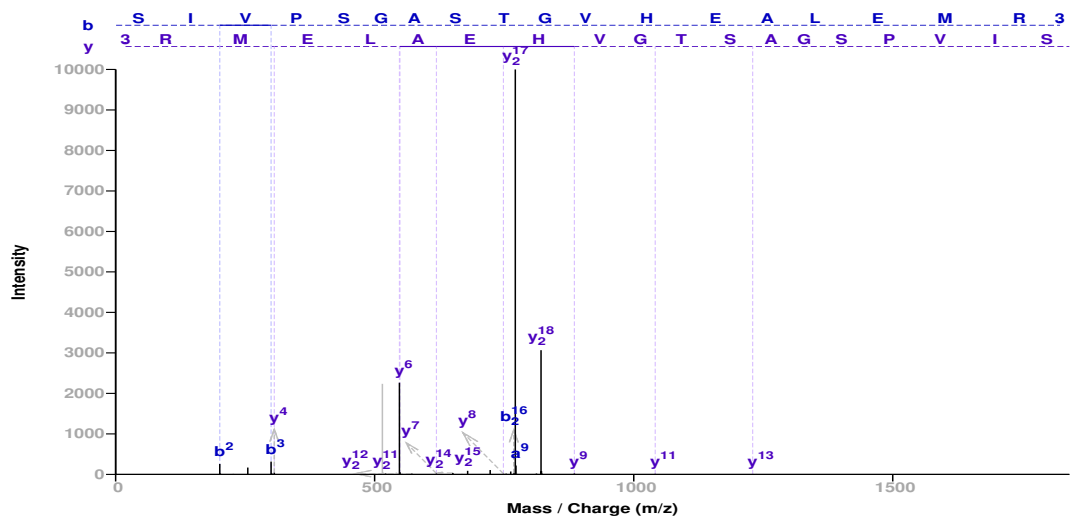



yeast2.Scan\_Number\_2178 Precursor m/z: 479.274 cosine: 0.783  $\alpha$ : 0.647

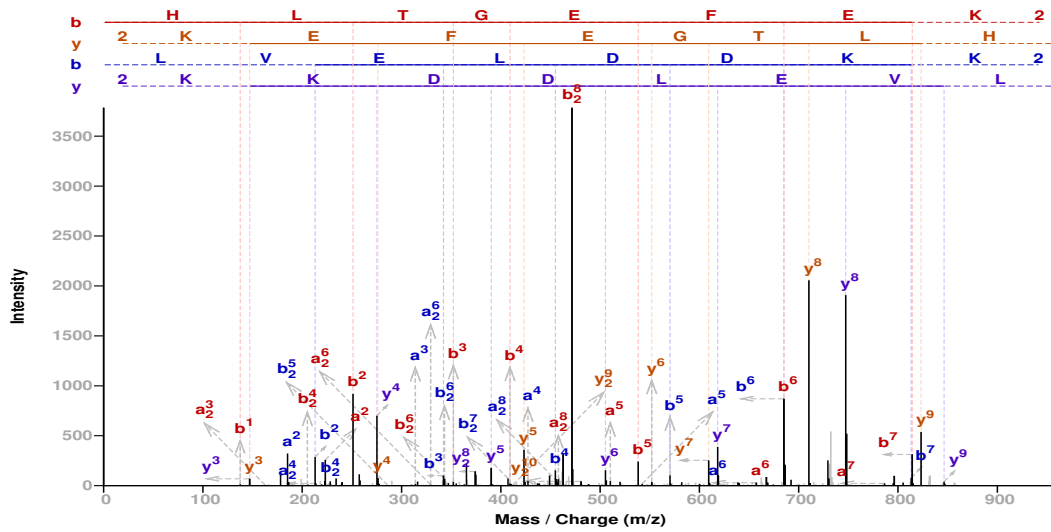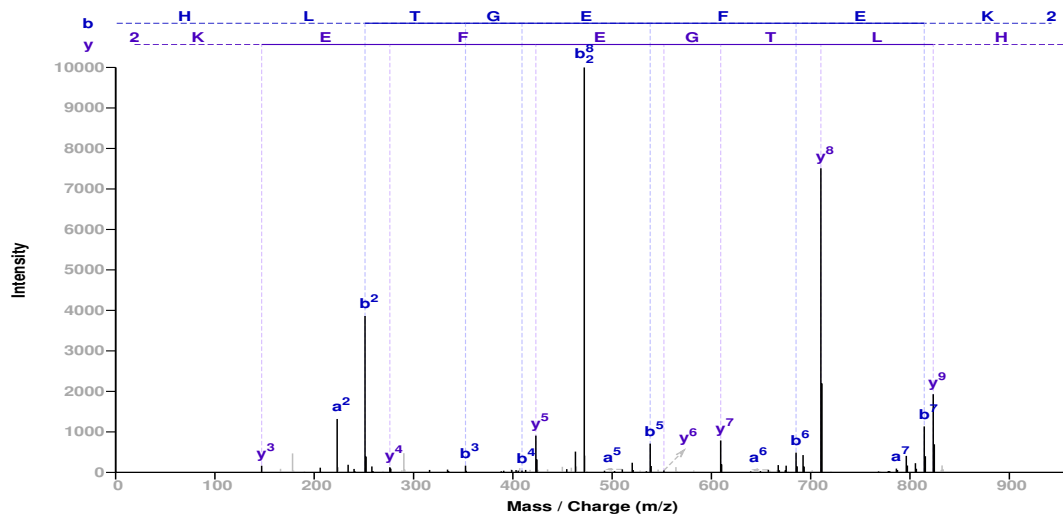

yeast2\_Scan\_Number\_2723 Precursor m/z: 409.226 cosine: 0.900  $\alpha$ : 0.645

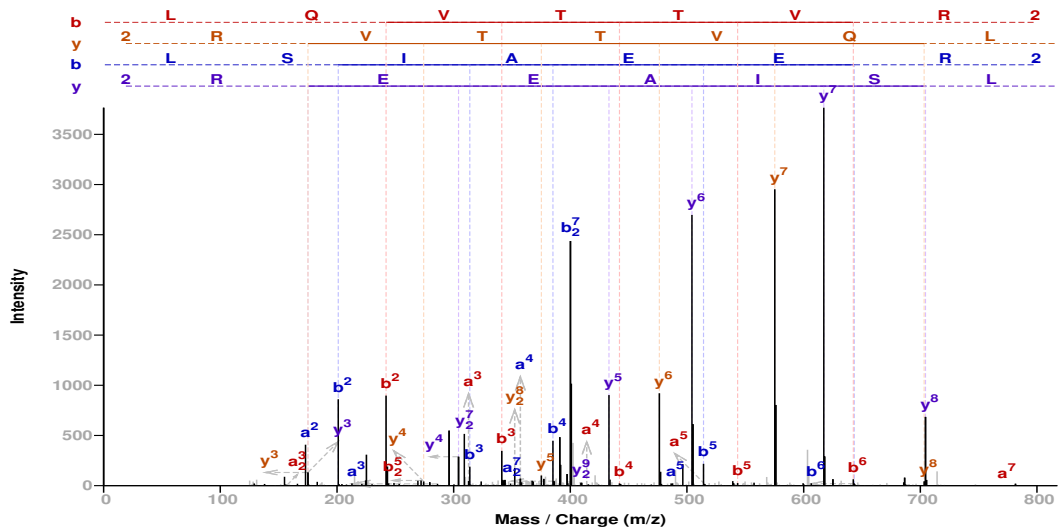

yeast2\_Scan\_Number\_6225 Precursor m/z: 596.383 cosine: 0.794  $\alpha$ : 0.635

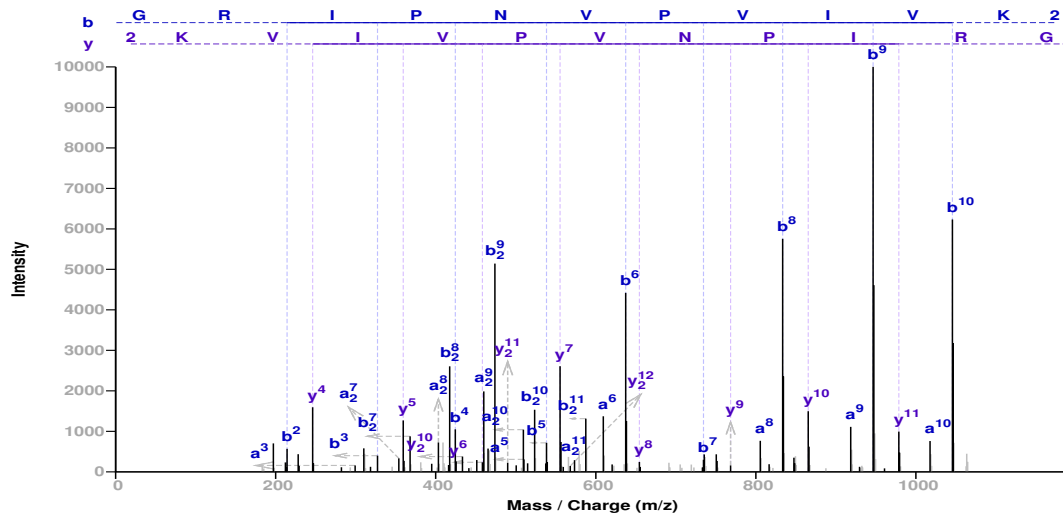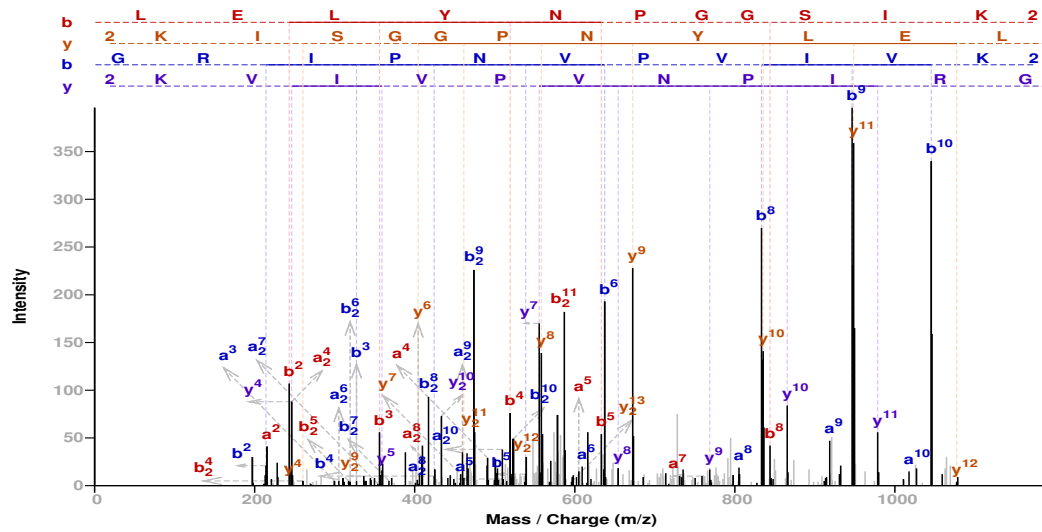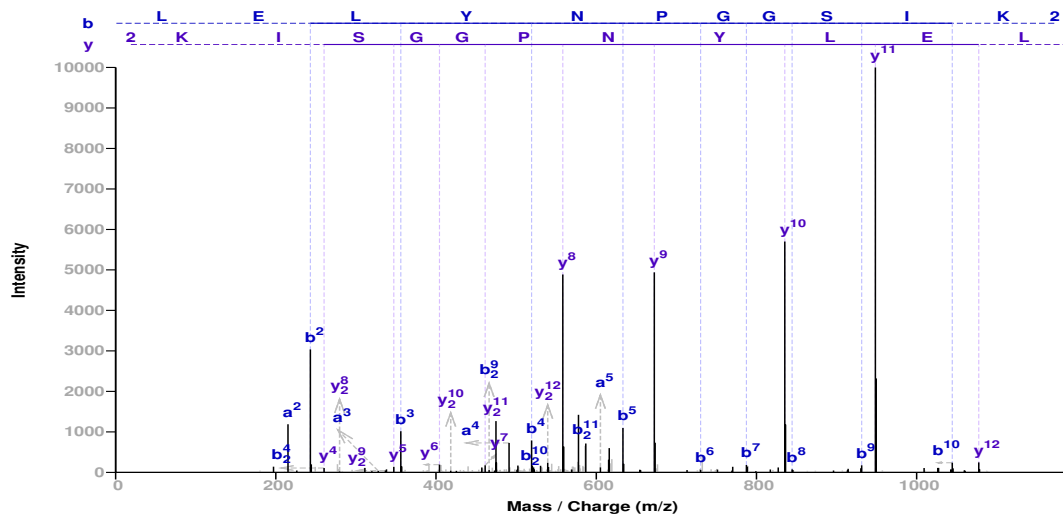

yeast2\_Scan\_Number\_3106 Precursor m/z: 494.294 cosine: 0.735  $\alpha$ : 0.633

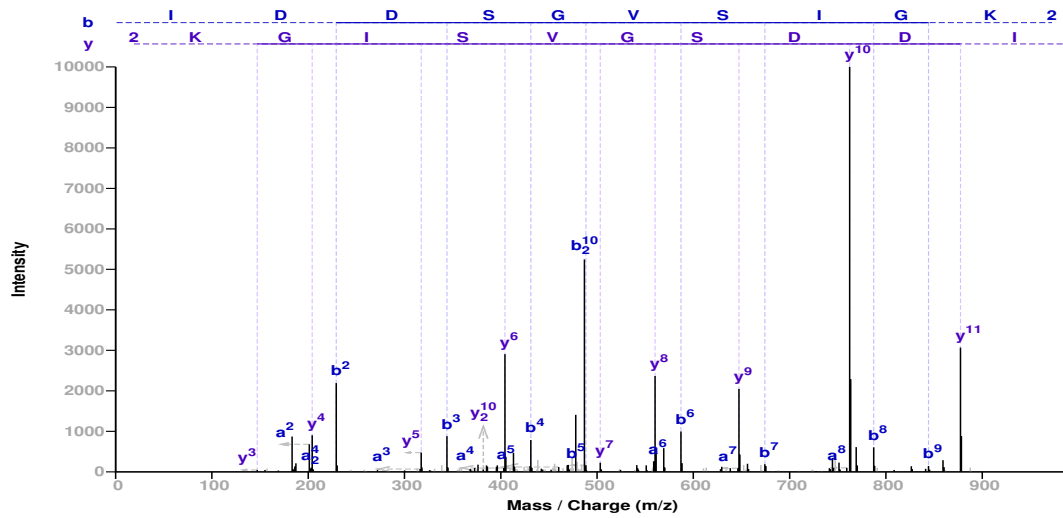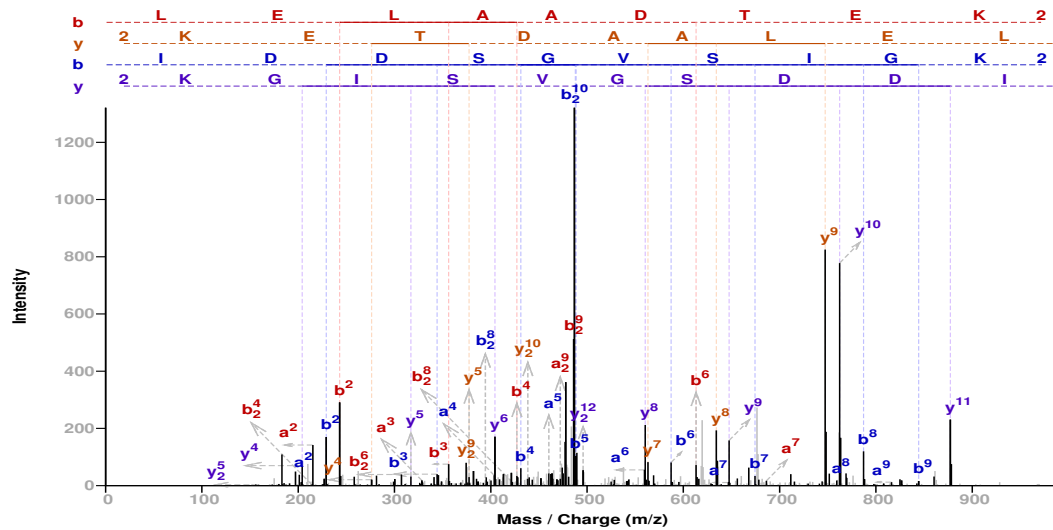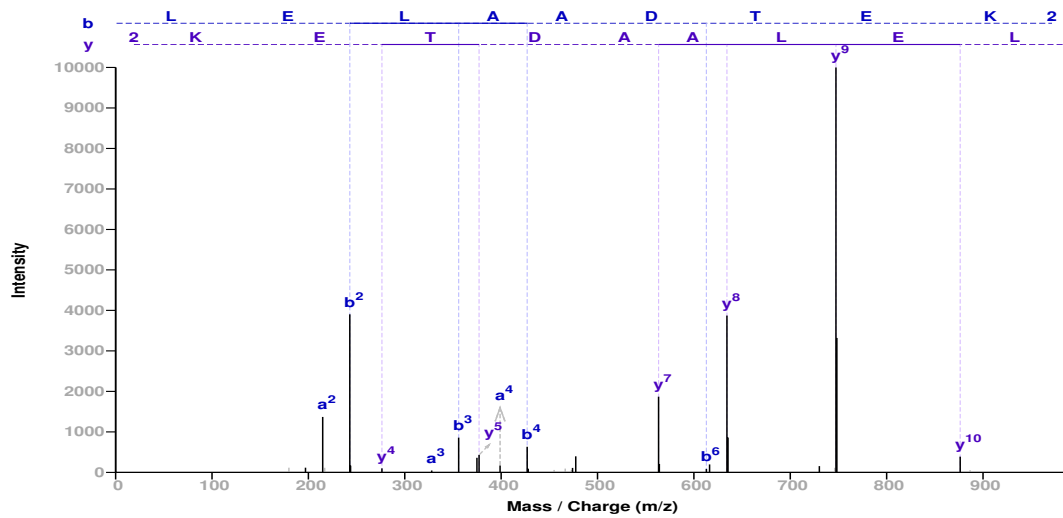

yeast2\_Scan\_Number\_5333 Precursor m/z: 568.789 cosine: 0.800  $\alpha$ : 0.632

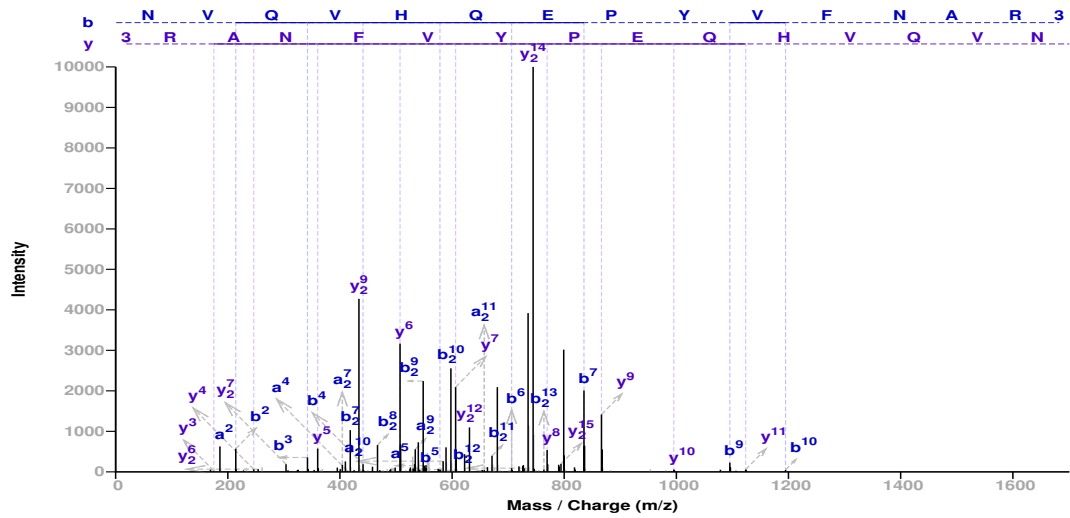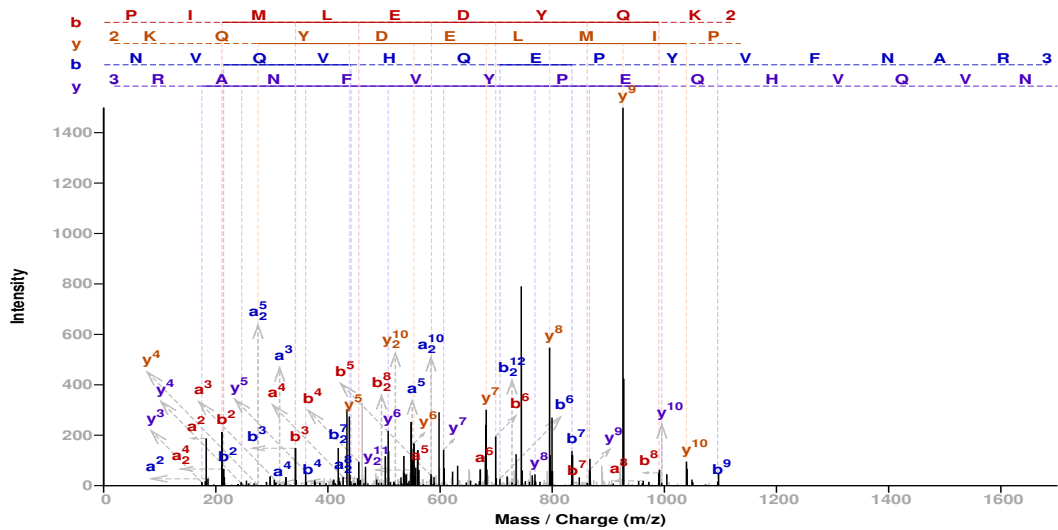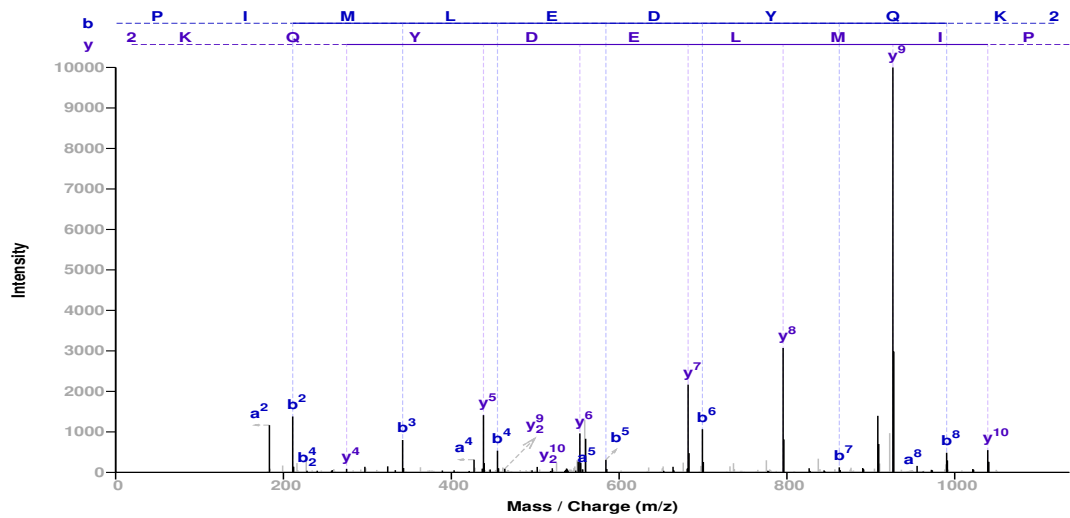

yeast2\_Scan\_Number\_2736 Precursor m/z: 446.732 cosine: 0.852  $\alpha$ : 0.627

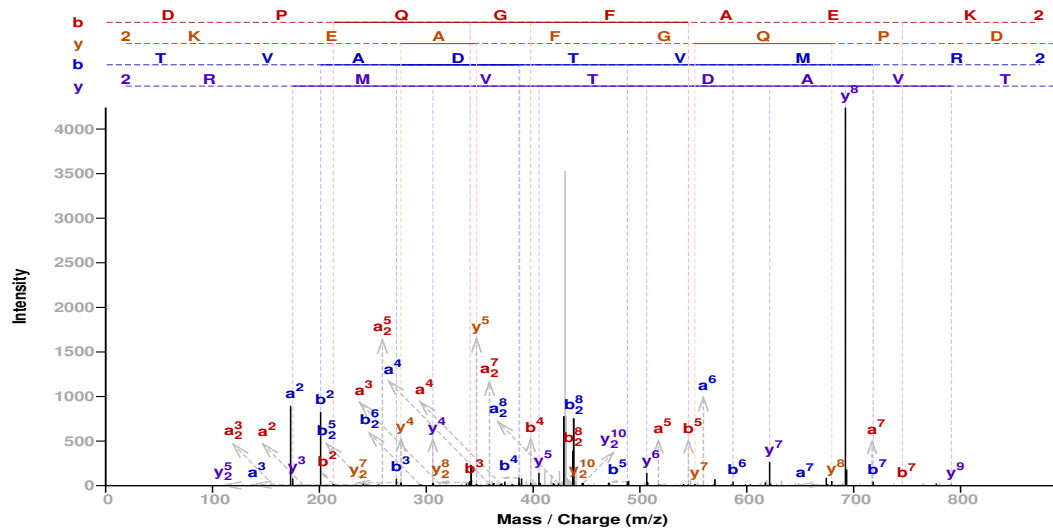

yeast2.Scan\_Number\_4180 Precursor m/z: 479.590 cosine: 0.747  $\alpha$ : 0.622

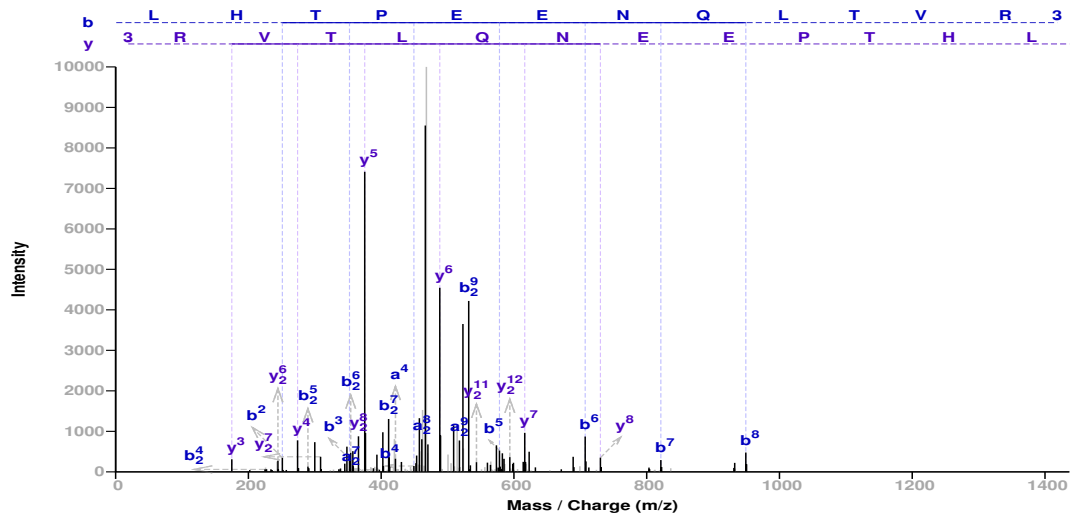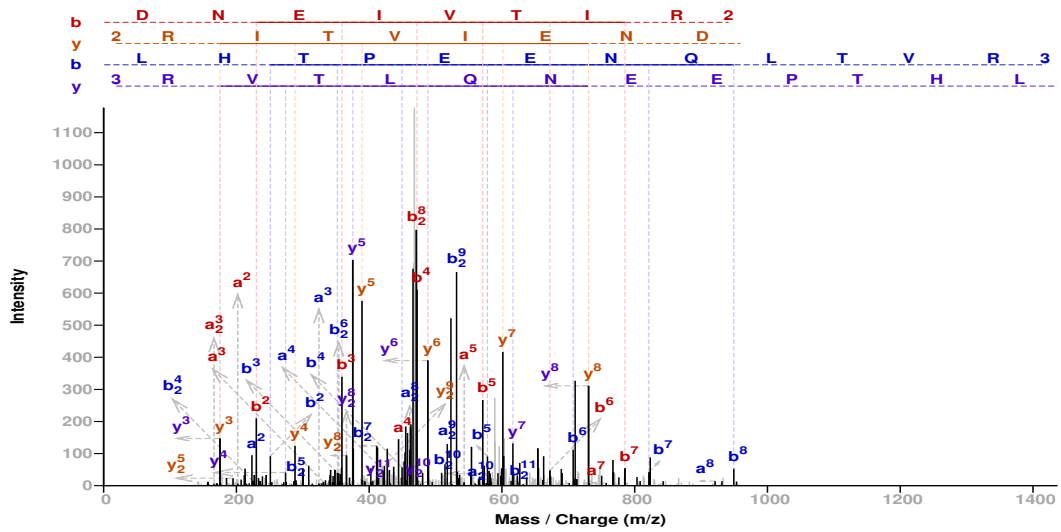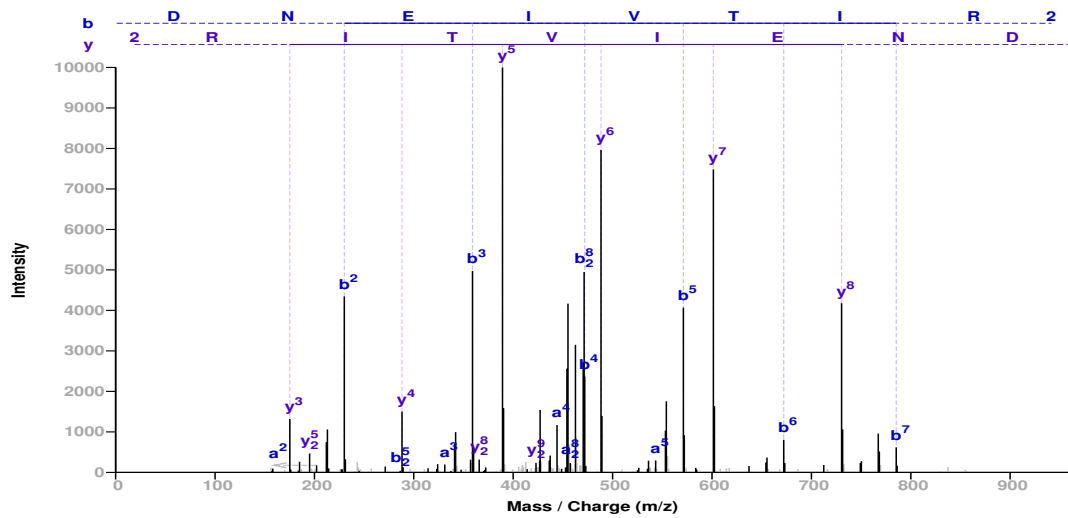

yeast2.Scan\_Number\_4673 Precursor m/z: 485.994 cosine: 0.784  $\alpha$ : 0.617

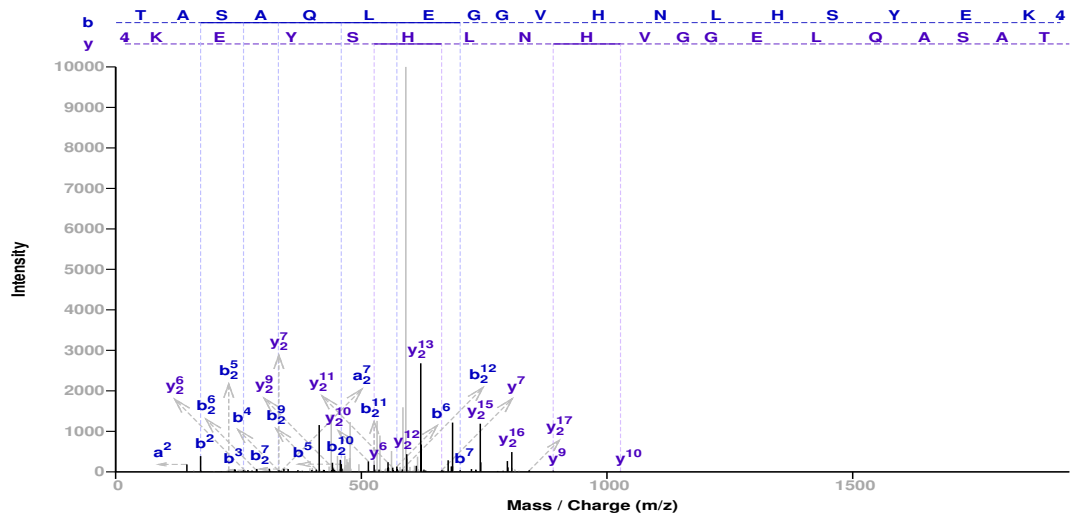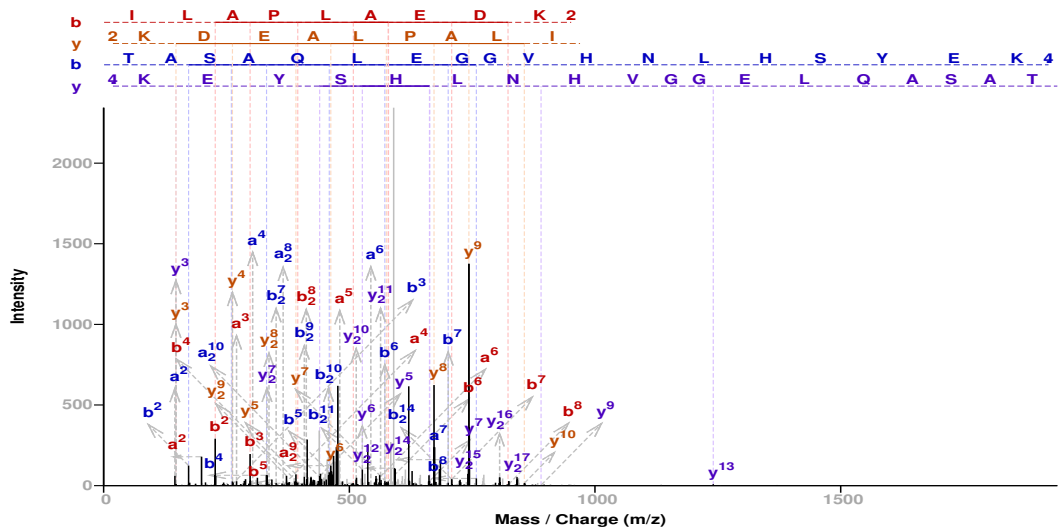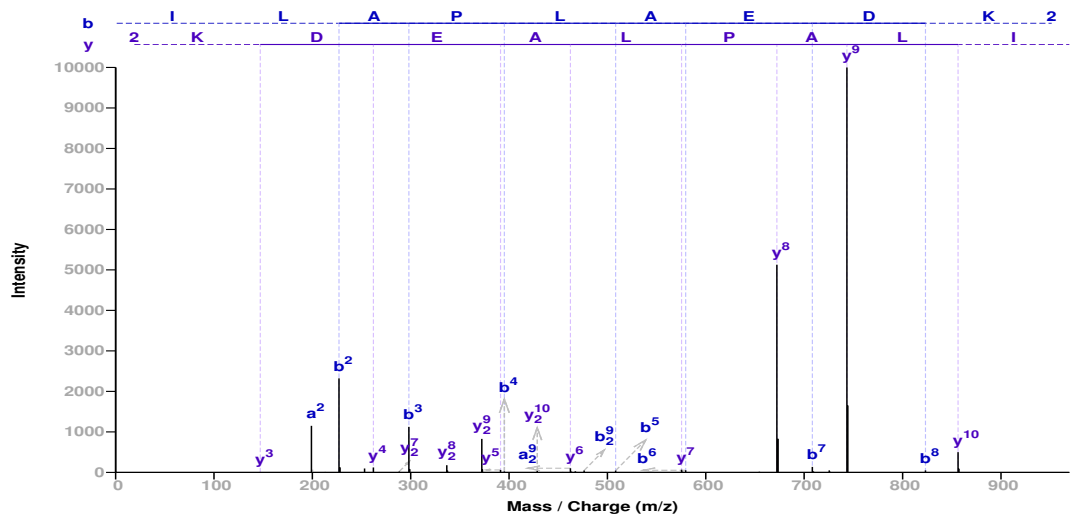



yeast2\_Scan\_Number\_3056 Precursor m/z: 409.727 cosine: 0.773  $\alpha$ : 0.613

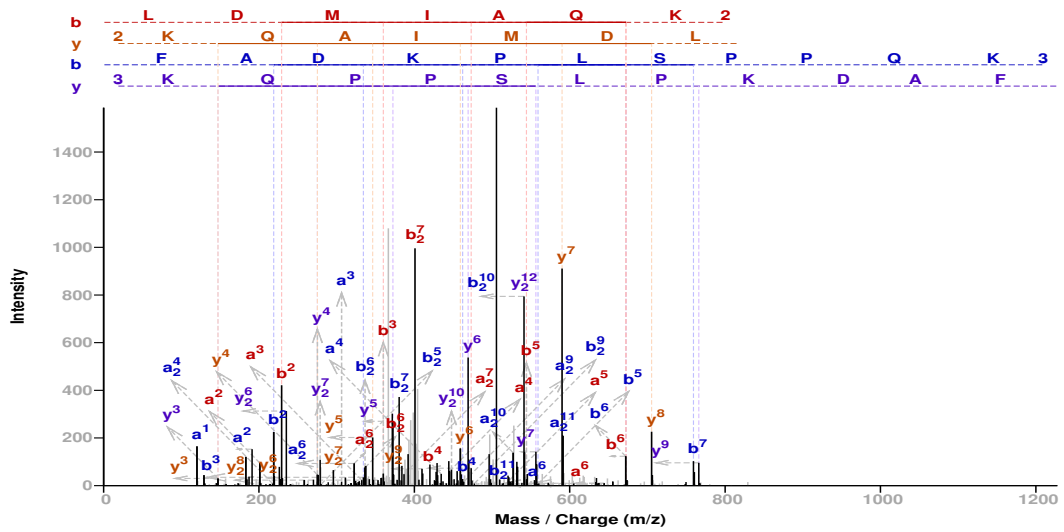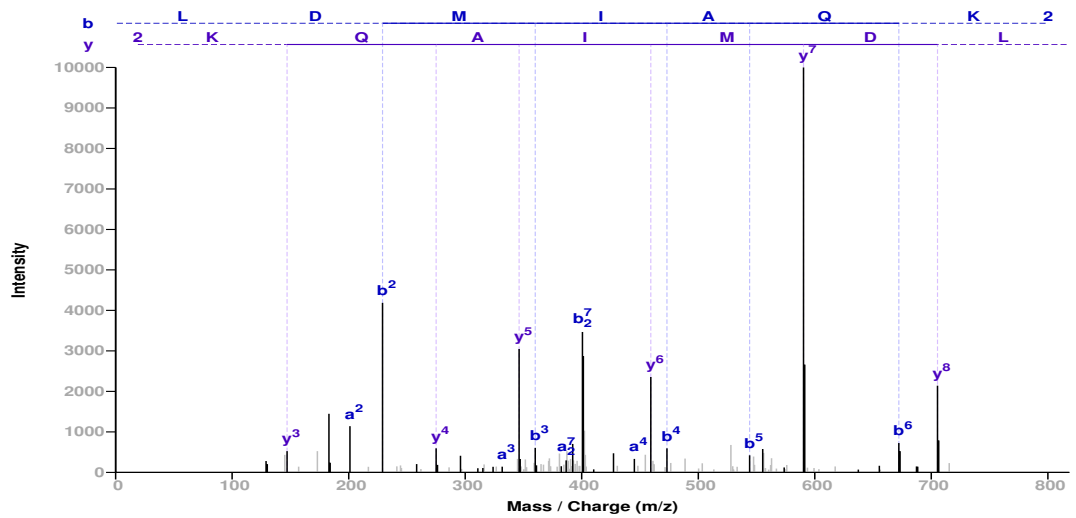

yeast2.Scan\_Number.1725 Precursor m/z: 540.261 cosine: 0.757  $\alpha$ : 0.603

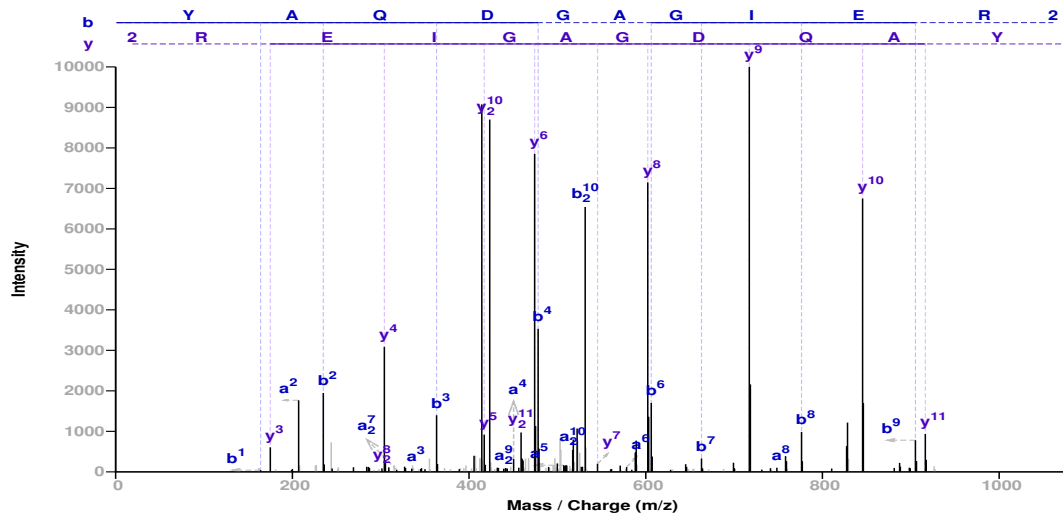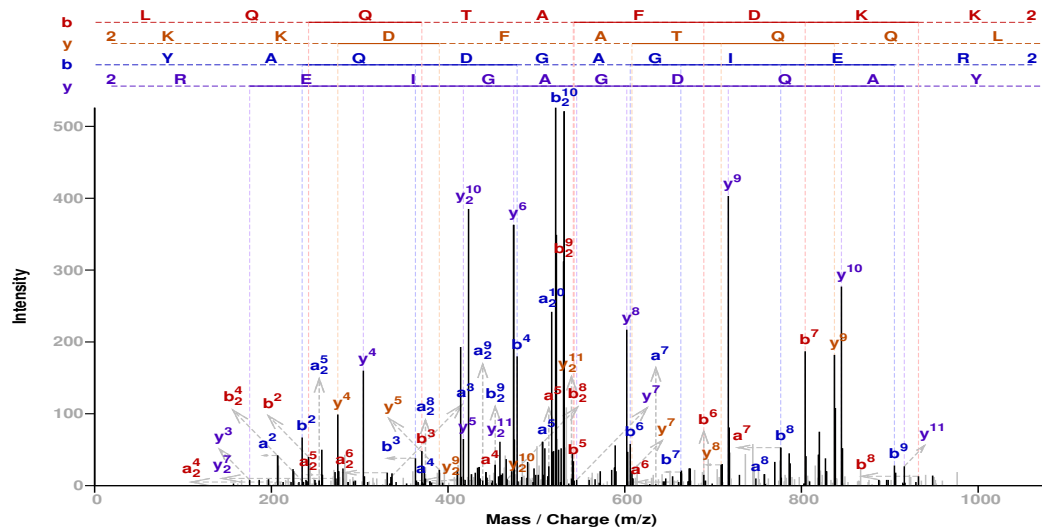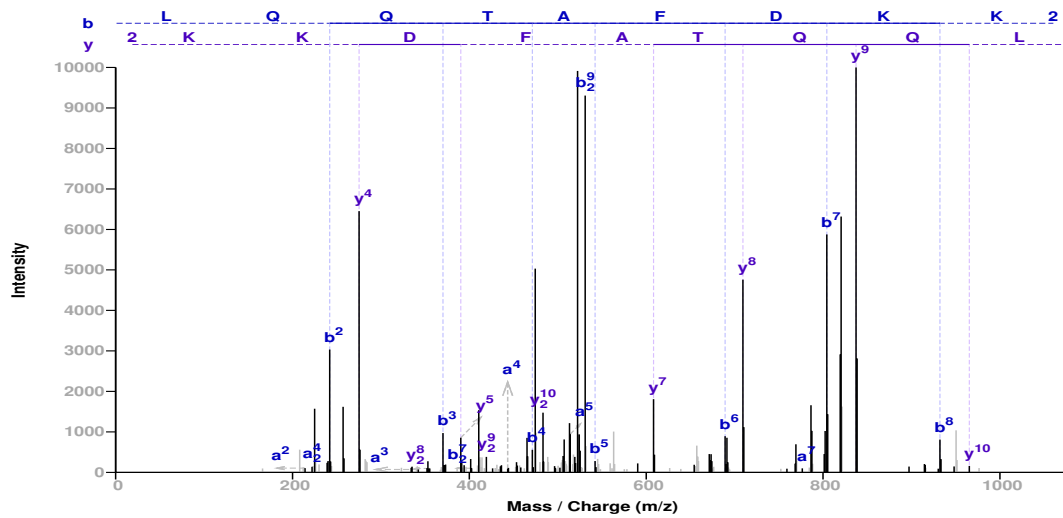

yeast2.Scan\_Number.2557 Precursor m/z: 673.824 cosine: 0.743  $\alpha$ : 0.599

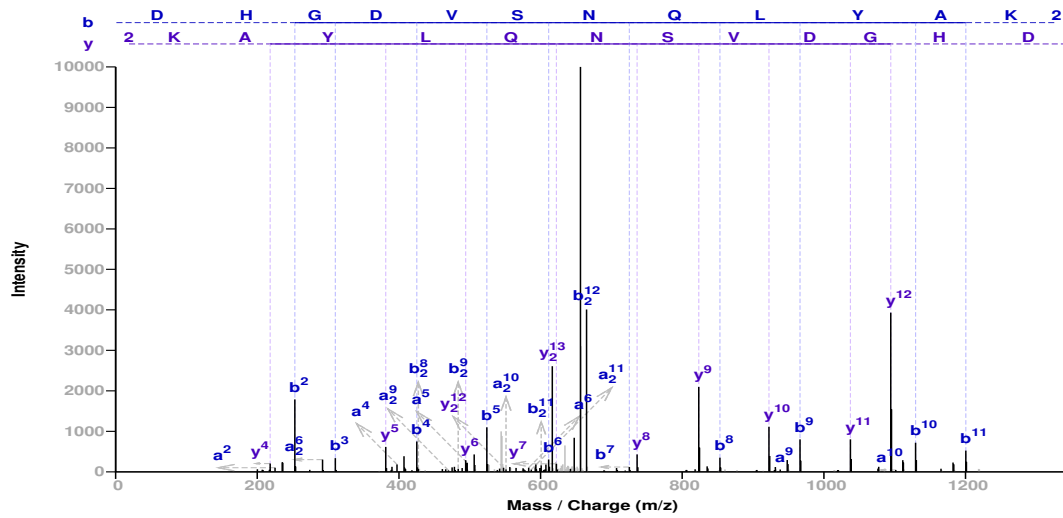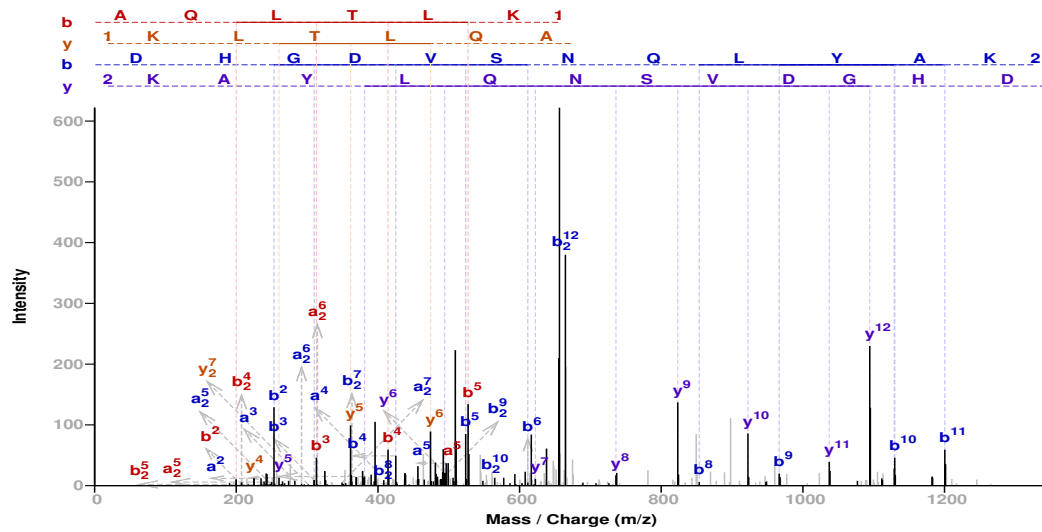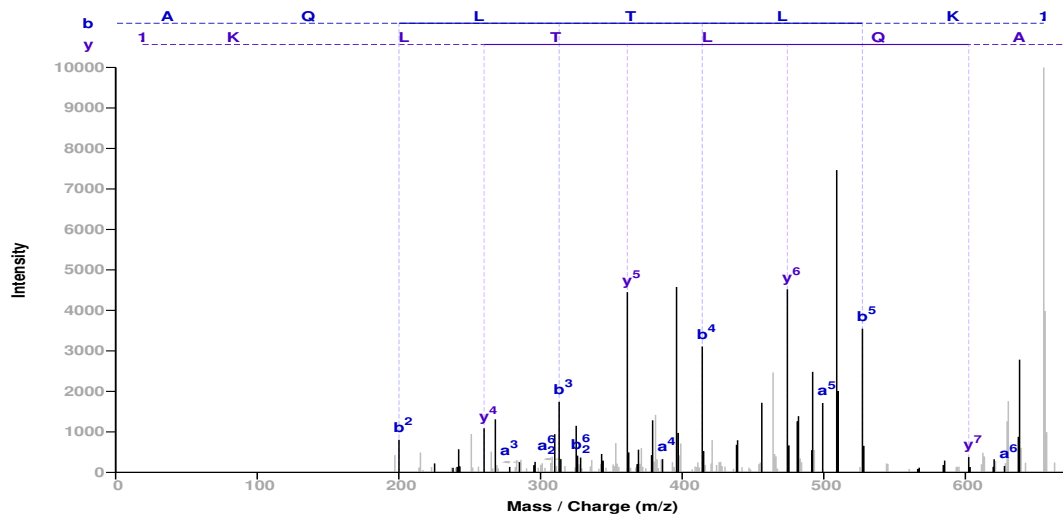

yeast2\_Scan\_Number\_3379 Precursor m/z: 610.824 cosine: 0.728  $\alpha$ : 0.596

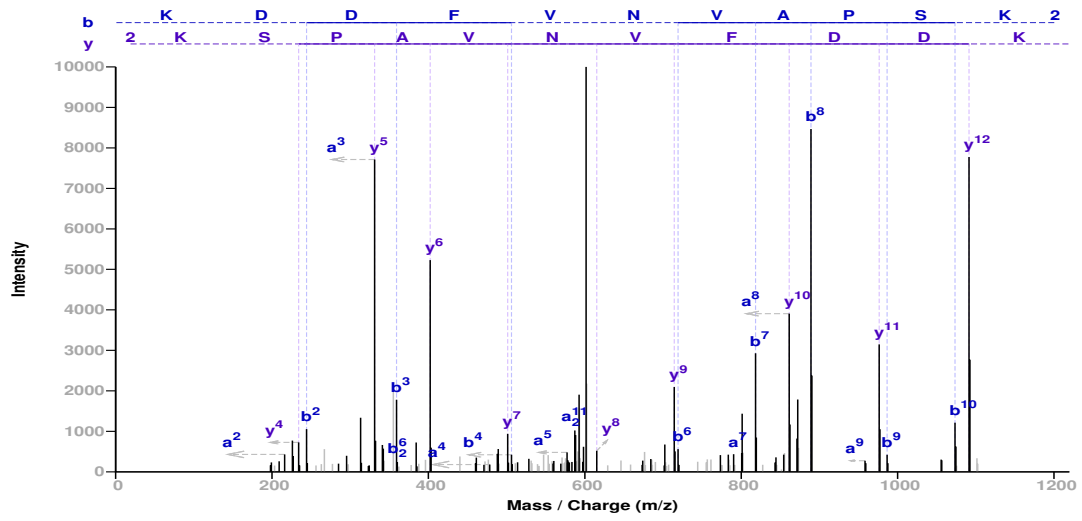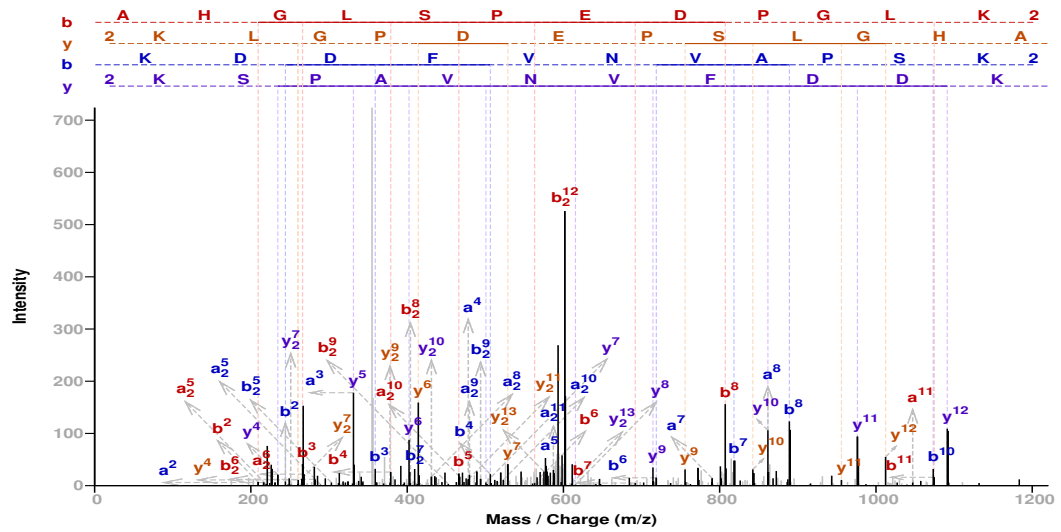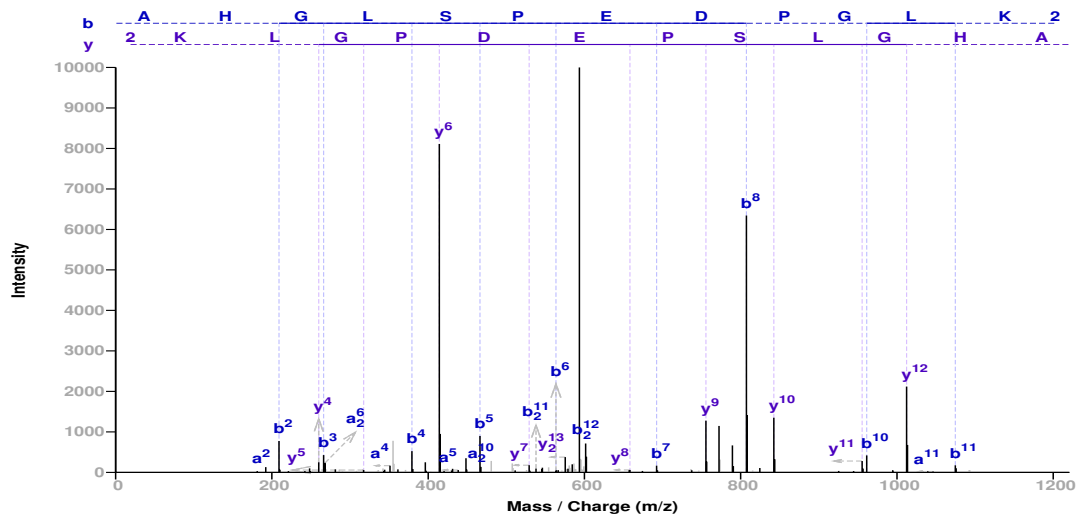

yeast2\_Scan\_Number\_1161 Precursor m/z: 391.235 cosine: 0.893  $\alpha$ : 0.583

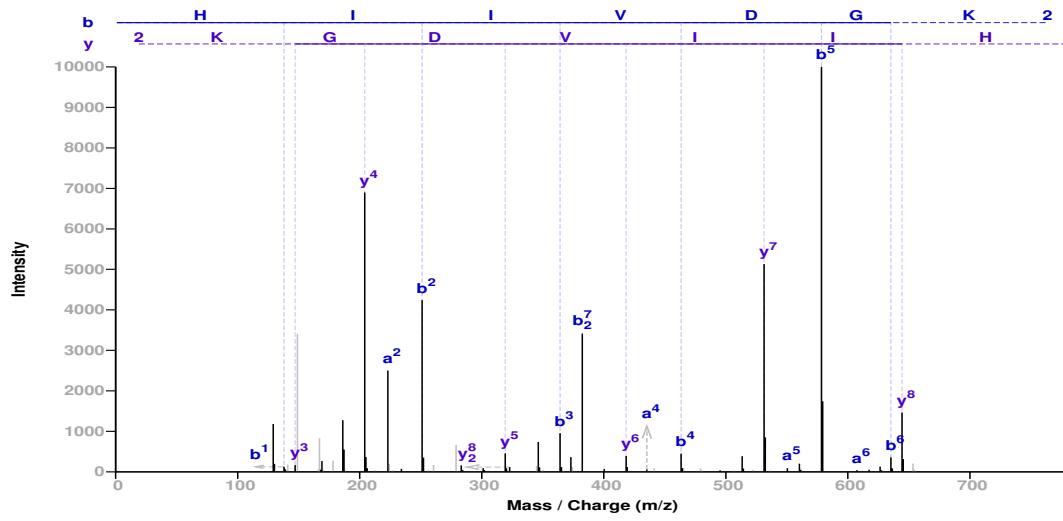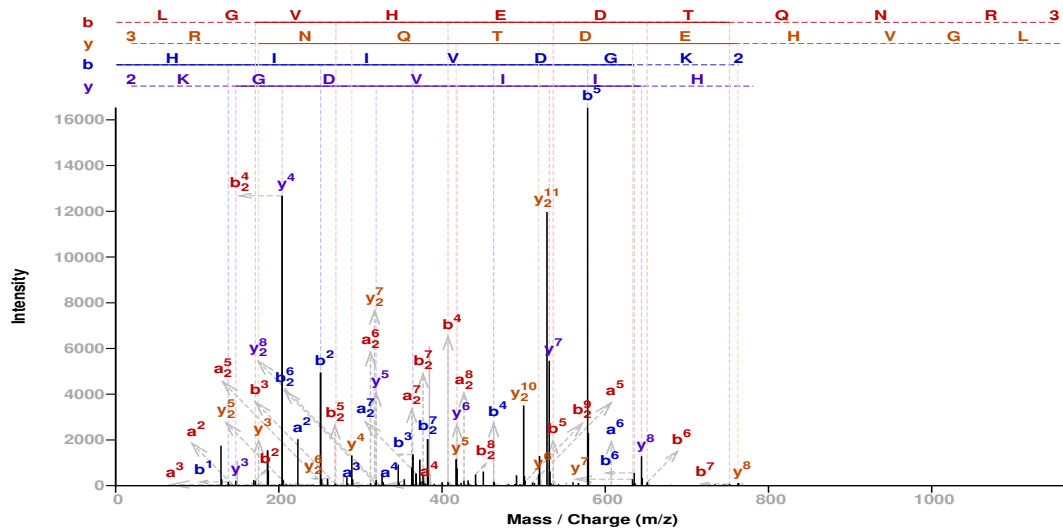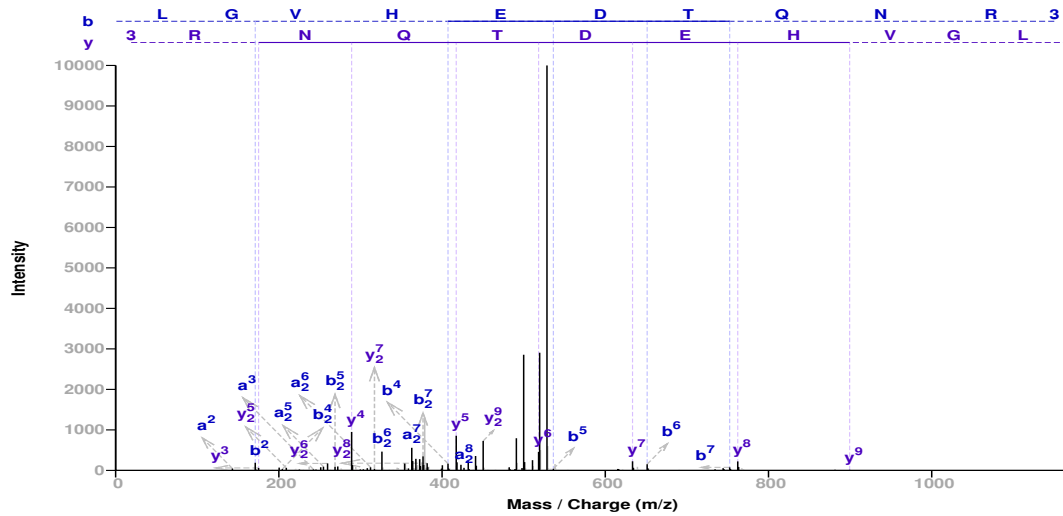

yeast2\_Scan\_Number\_3287 Precursor m/z: 484.740 cosine: 0.813  $\alpha$ : 0.581

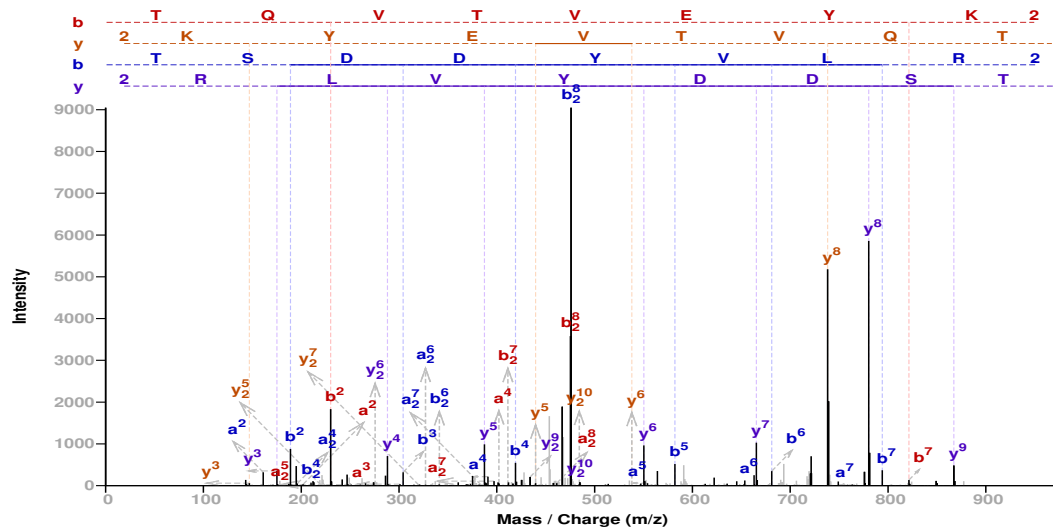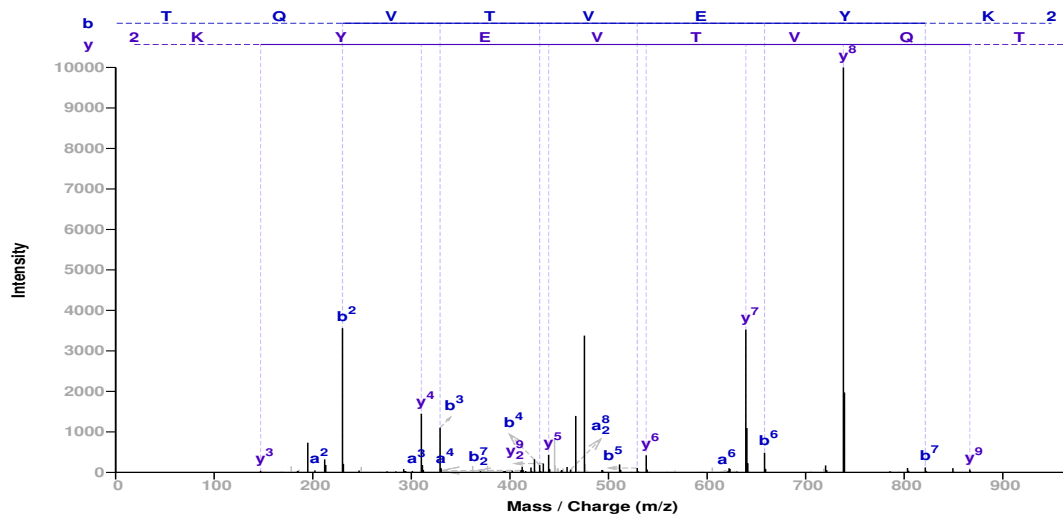

yeast2\_Scan\_Number\_5985 Precursor m/z: 556.300 cosine: 0.790  $\alpha$ : 0.561

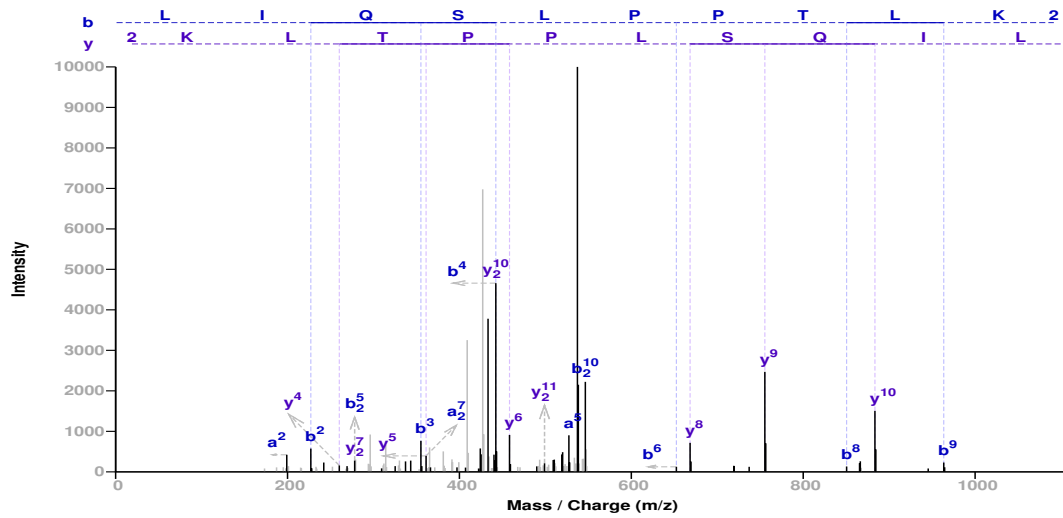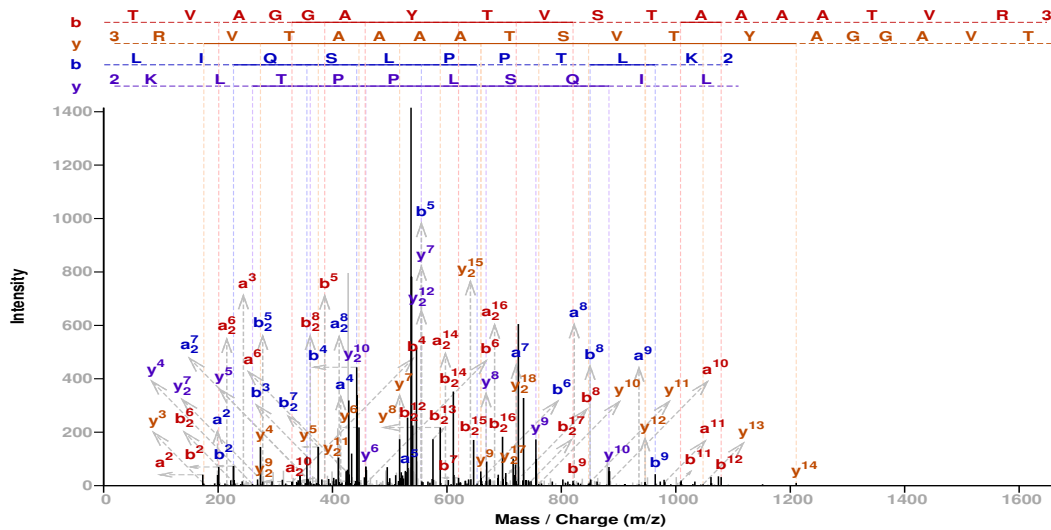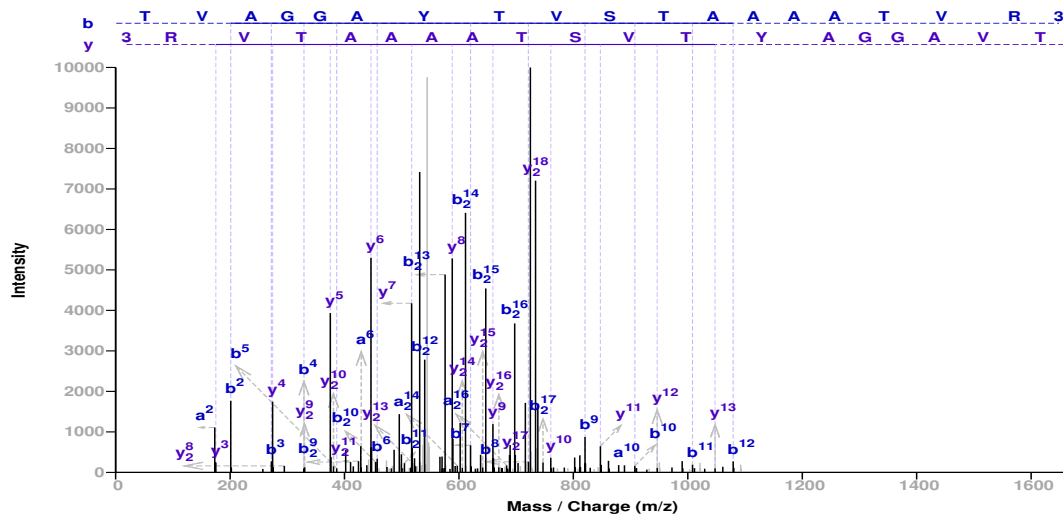

yeast2\_Scan\_Number\_6581 Precursor m/z: 486.946 cosine: 0.779  $\alpha$ : 0.556

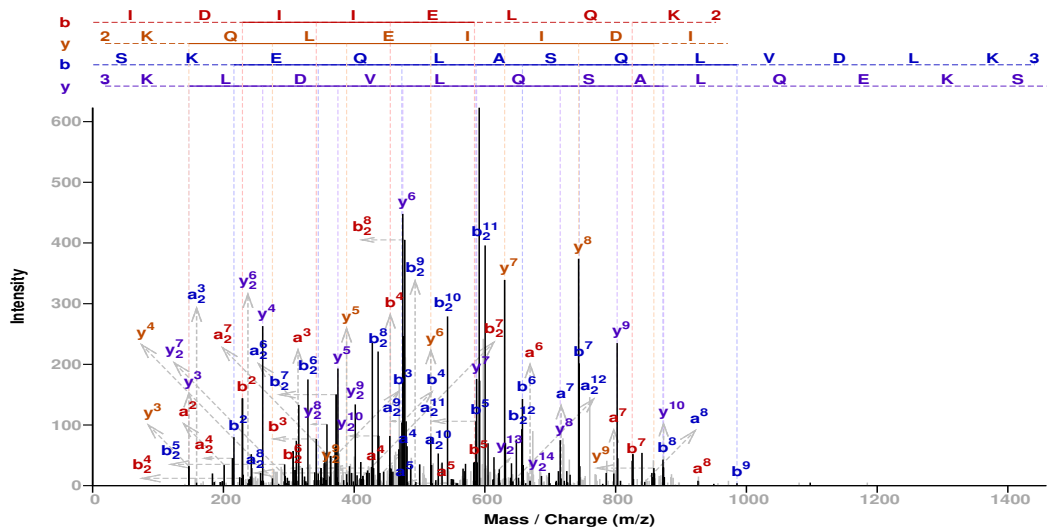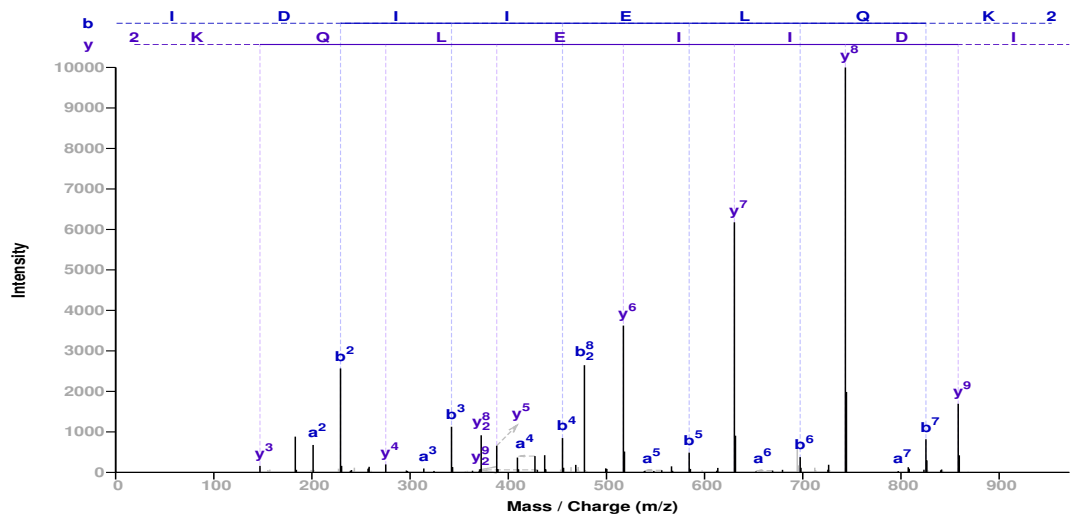



yeast2\_Scan\_Number\_348 Precursor m/z: 403.233 cosine: 0.775  $\alpha$ : 0.552

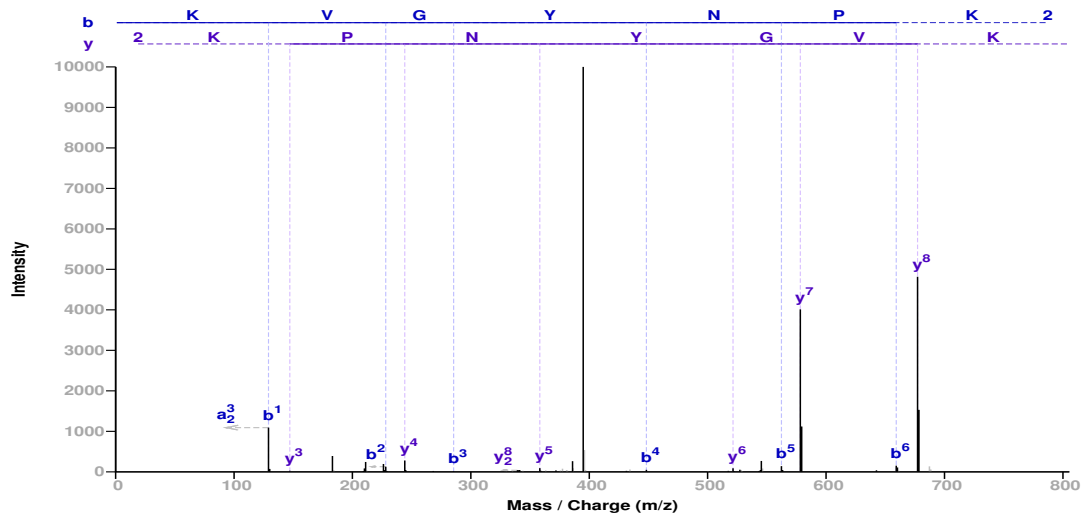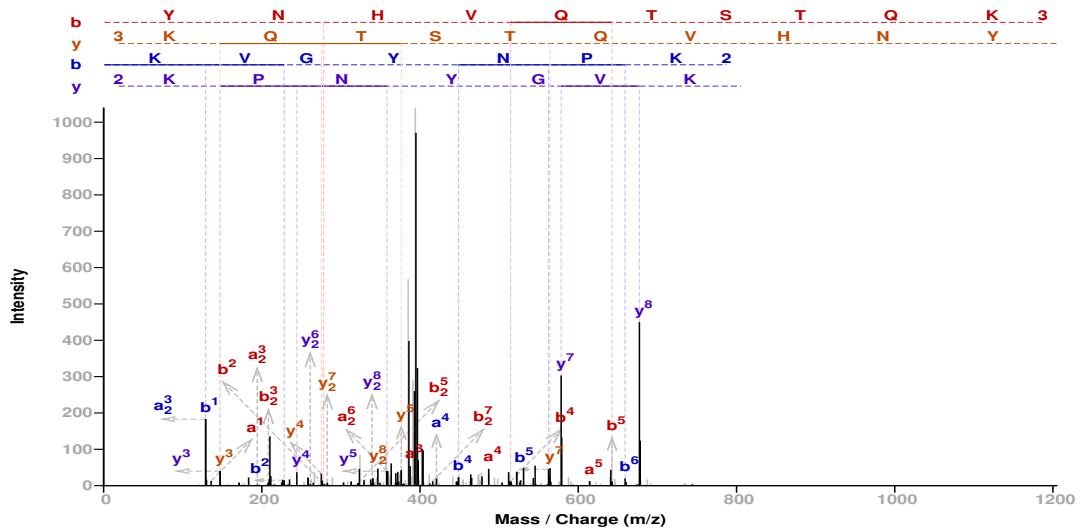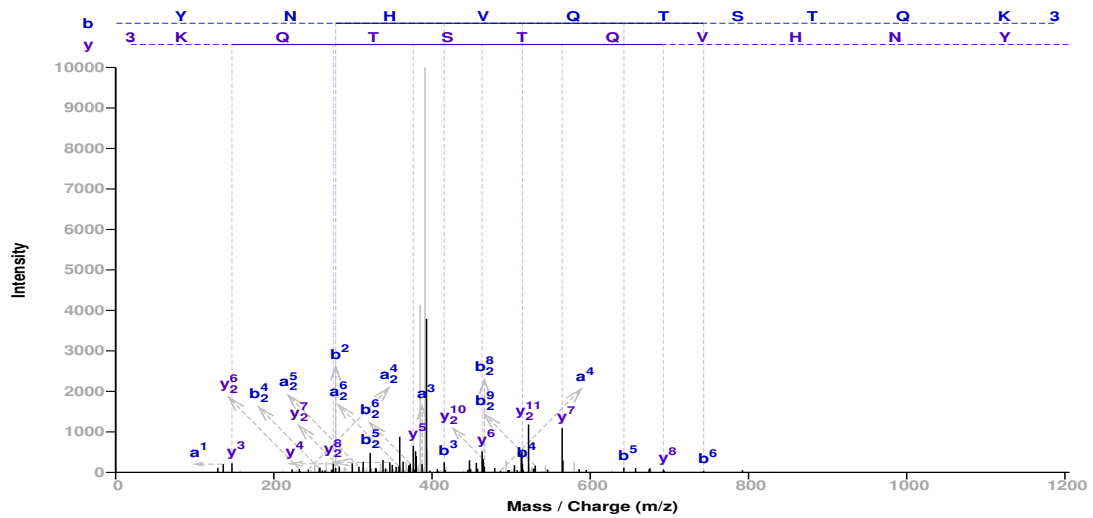

yeast2\_Scan\_Number\_4543 Precursor m/z: 302.522 cosine: 0.749  $\alpha$ : 0.551

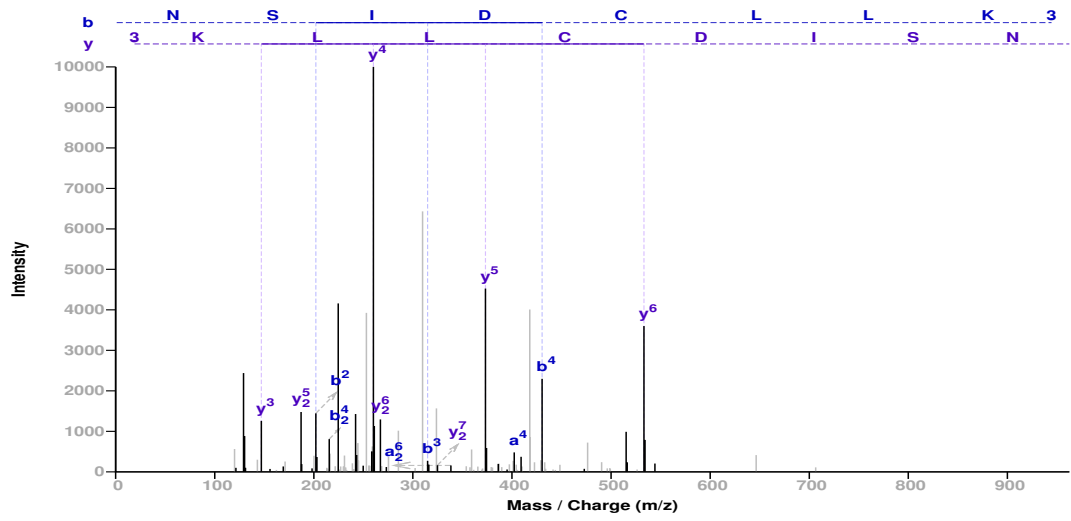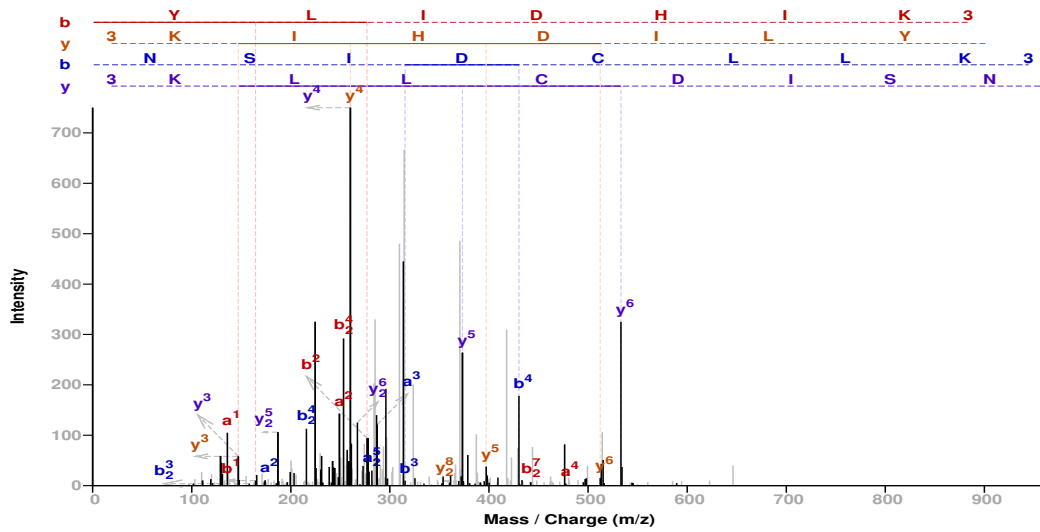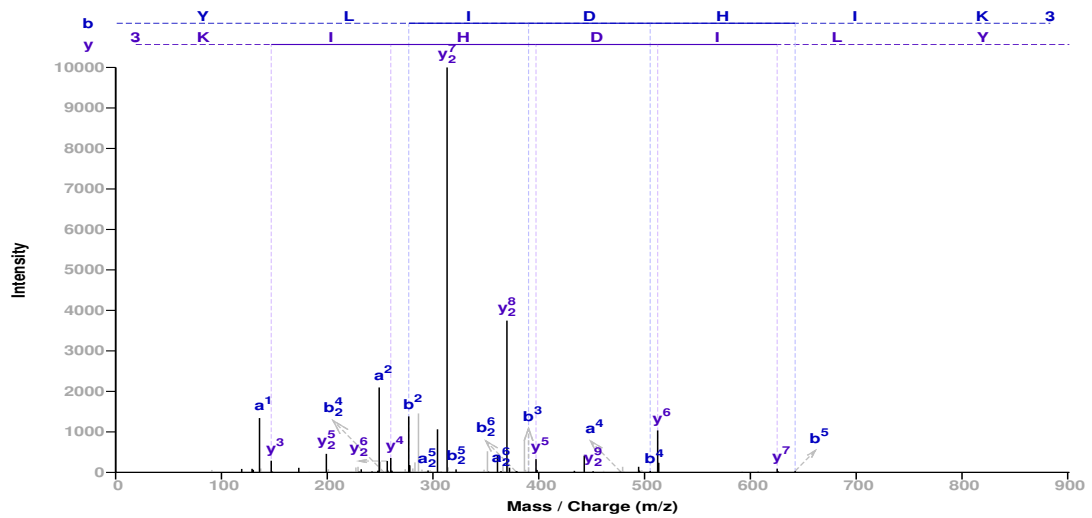

yeast2\_Scan\_Number\_7226 Precursor m/z: 446.759 cosine: 0.878  $\alpha$ : 0.550

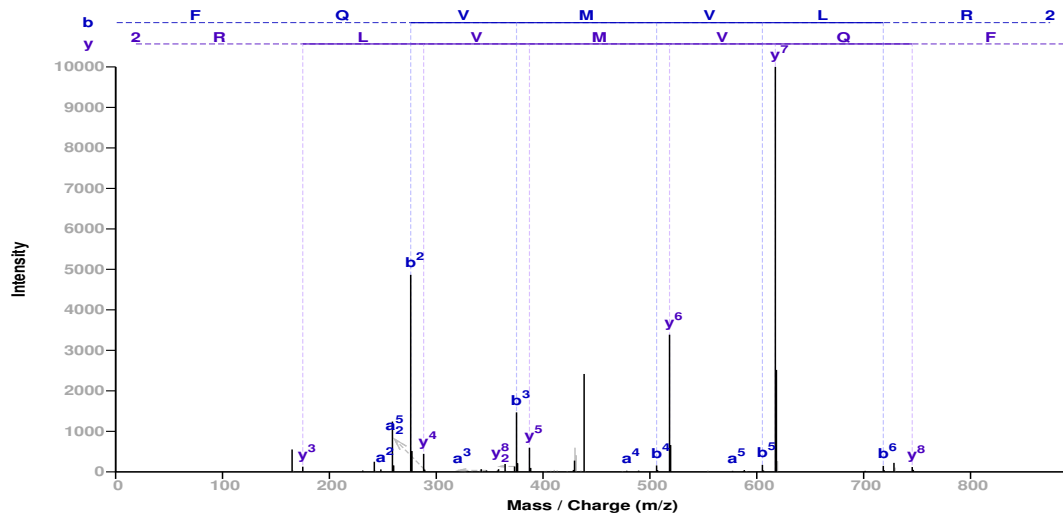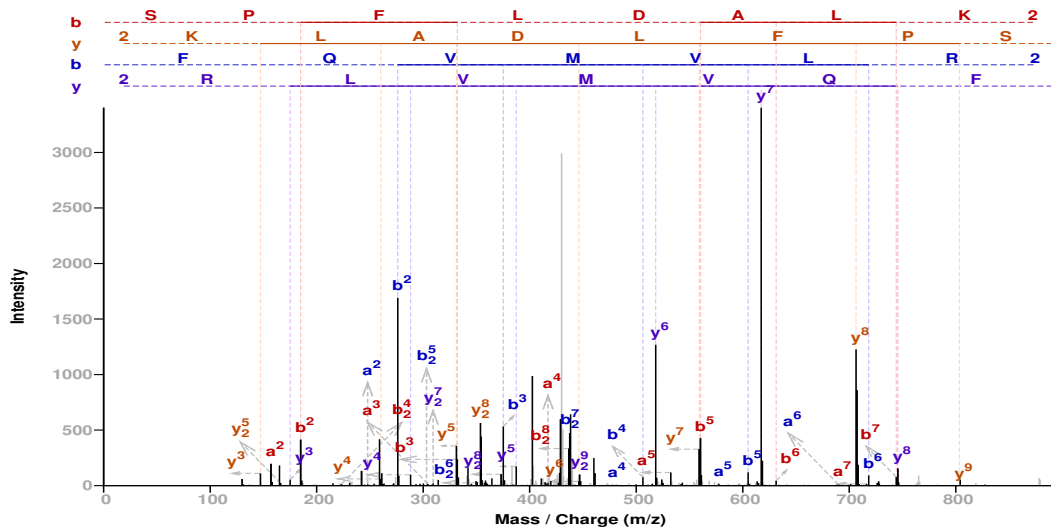

yeast2\_Scan\_Number\_6615 Precursor m/z: 730.872 cosine: 0.841  $\alpha$ : 0.550

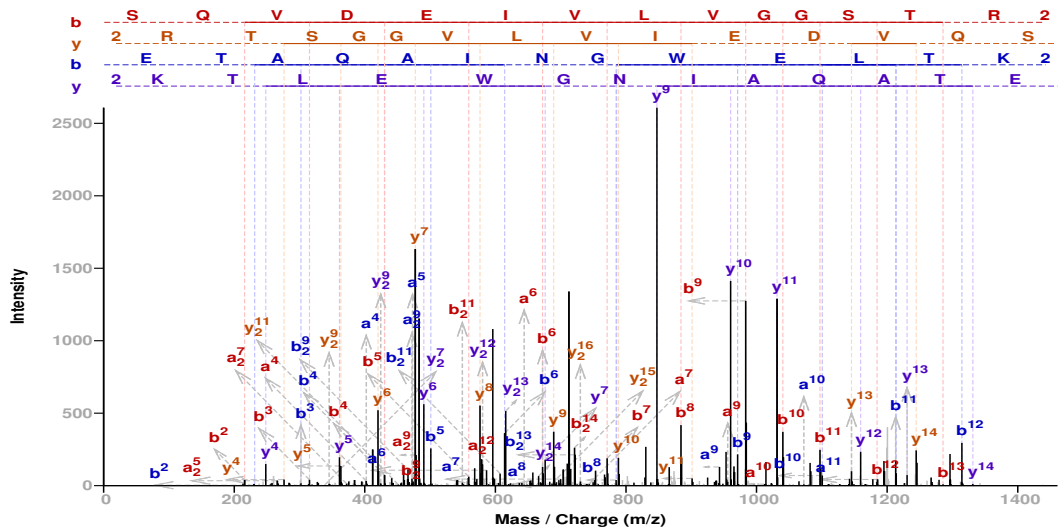



yeast2\_Scan\_Number\_7013 Precursor m/z: 684.389 cosine: 0.734  $\alpha$ : 0.543

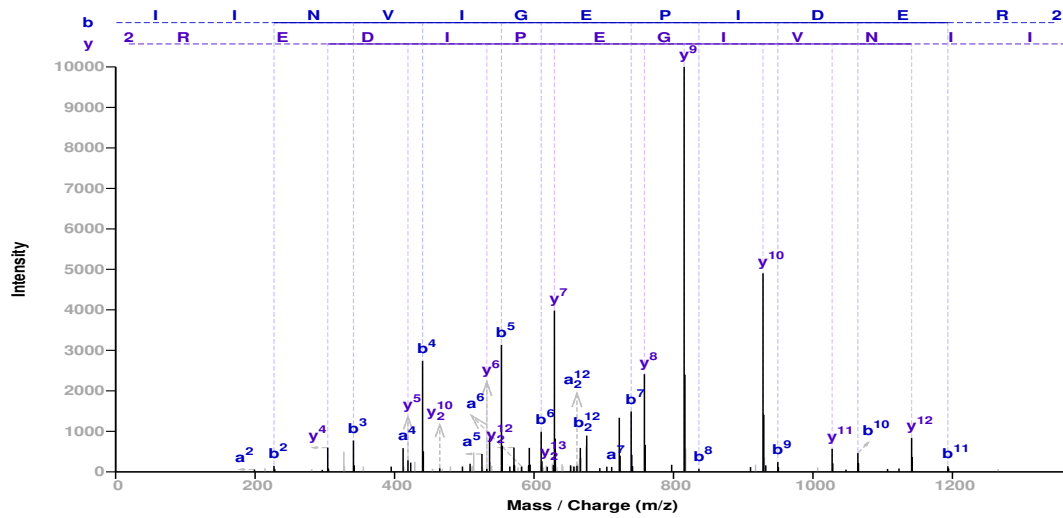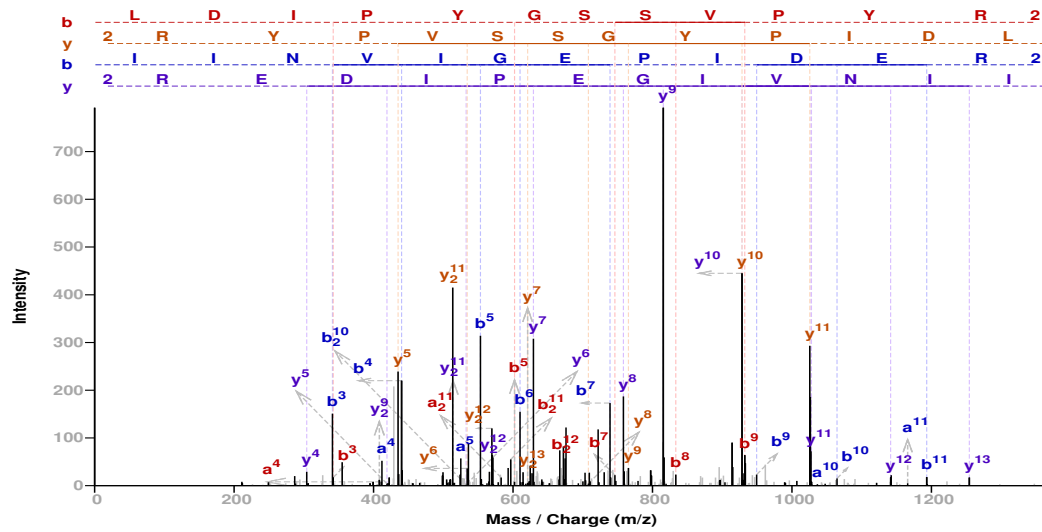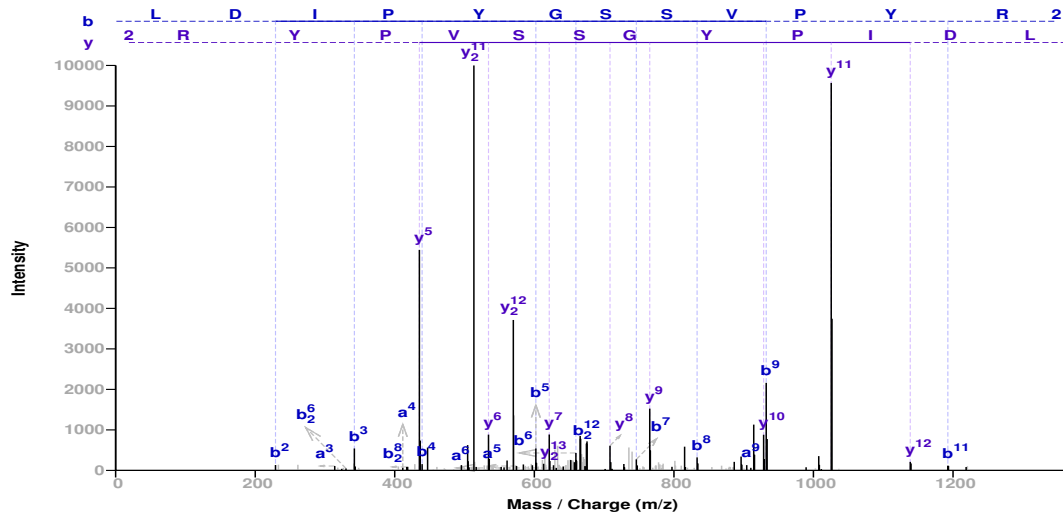

yeast2.Scan\_Number\_4086 Precursor m/z: 408.234 cosine: 0.791  $\alpha$ : 0.542

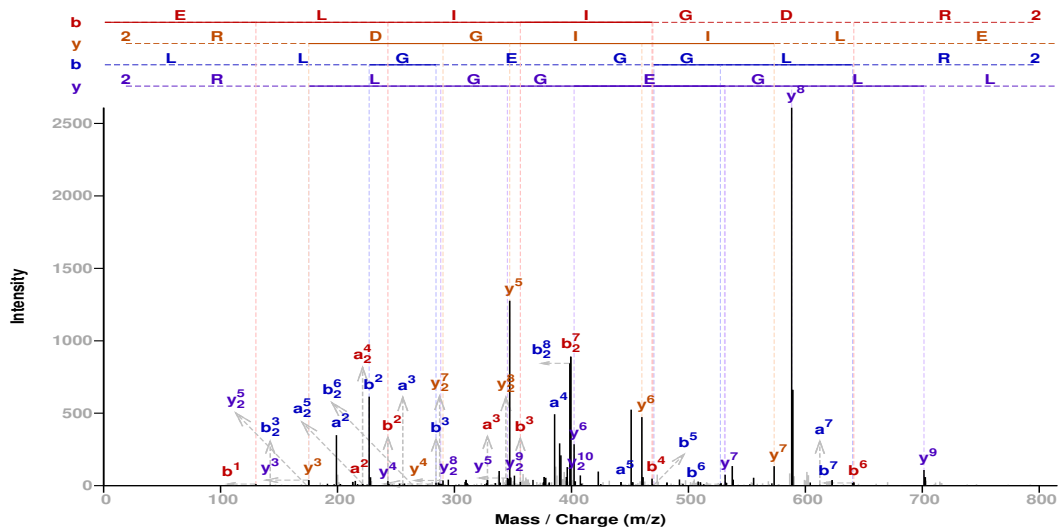

yeast2\_Scan\_Number\_952 Precursor m/z: 481.752 cosine: 0.759  $\alpha$ : 0.534

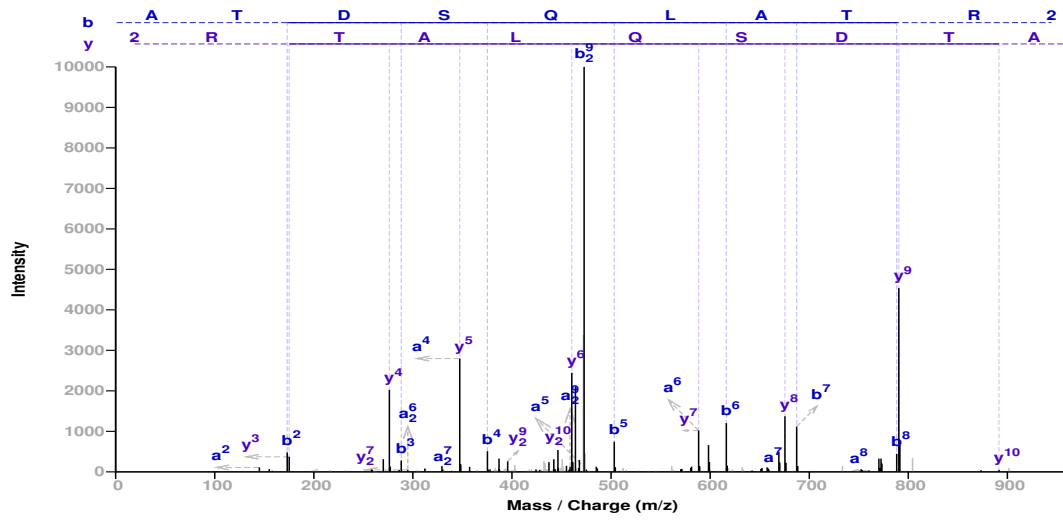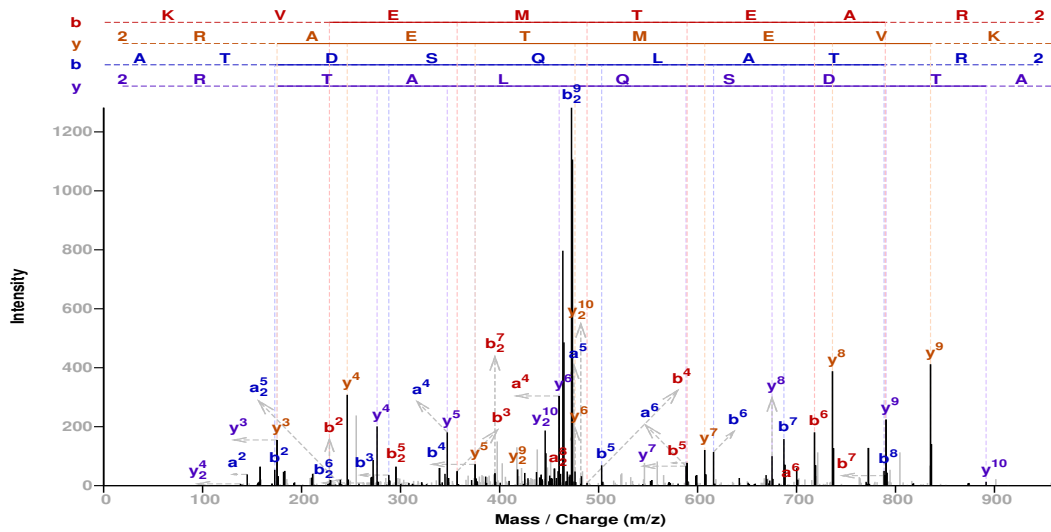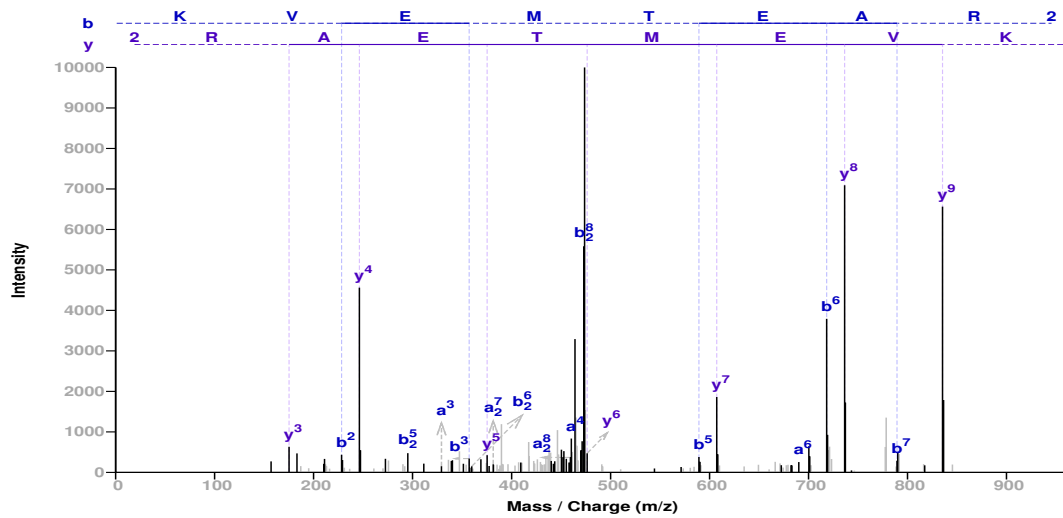





yeast2.Scan\_Number\_3249 Precursor m/z: 343.236 cosine: 0.909  $\alpha$ : 0.522

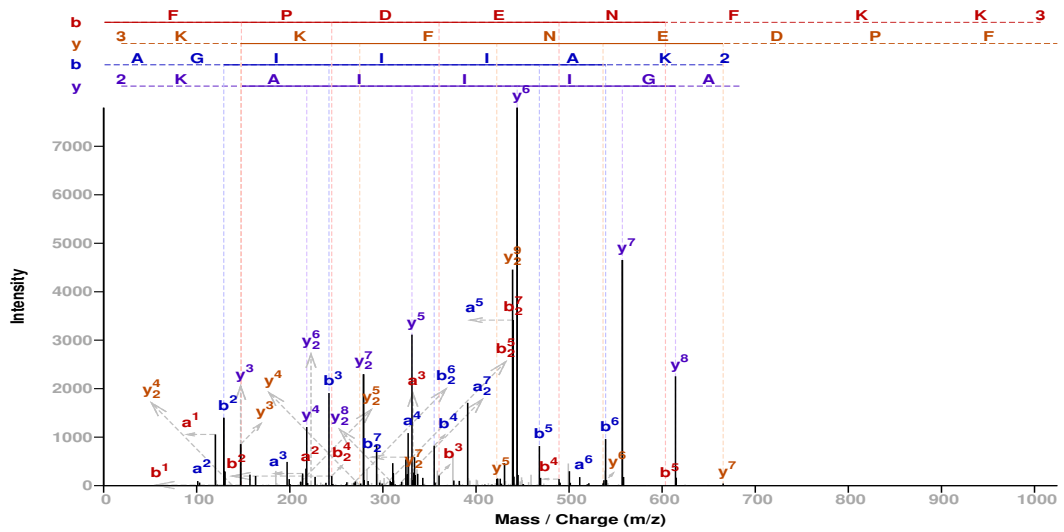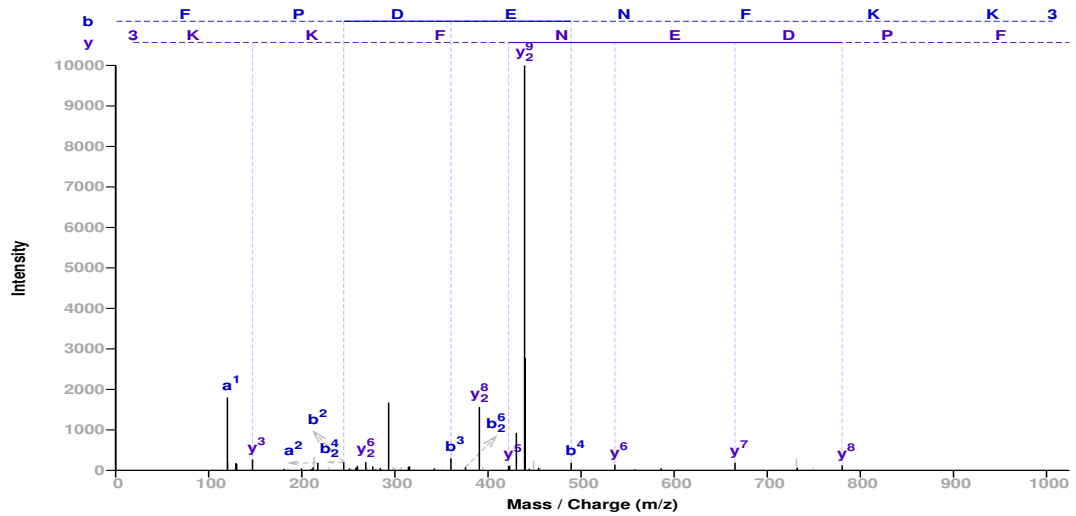

yeast2\_Scan\_Number\_7867 Precursor m/z: 559.796 cosine: 0.820  $\alpha$ : 0.519

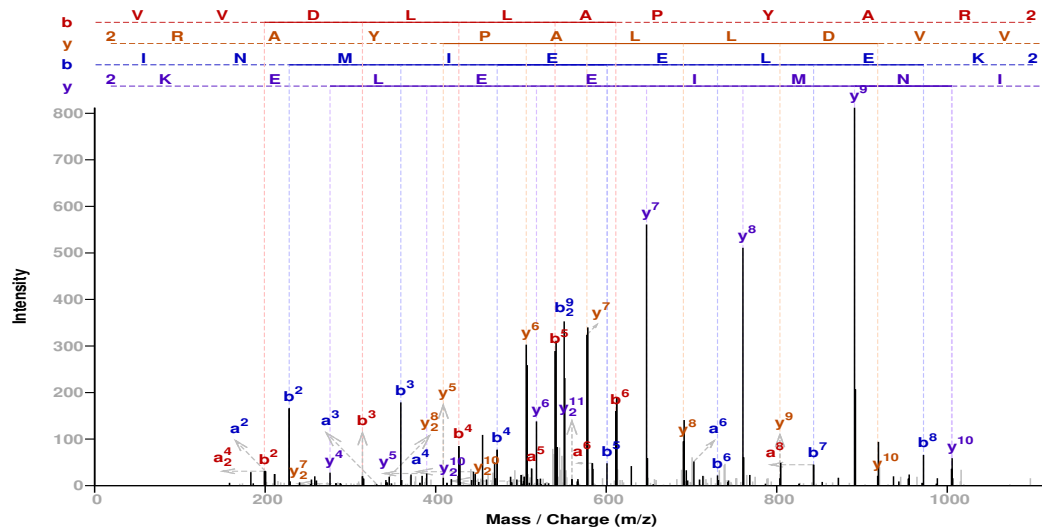

yeast2\_Scan\_Number\_9703 Precursor m/z: 789.909 cosine: 0.760  $\alpha$ : 0.517

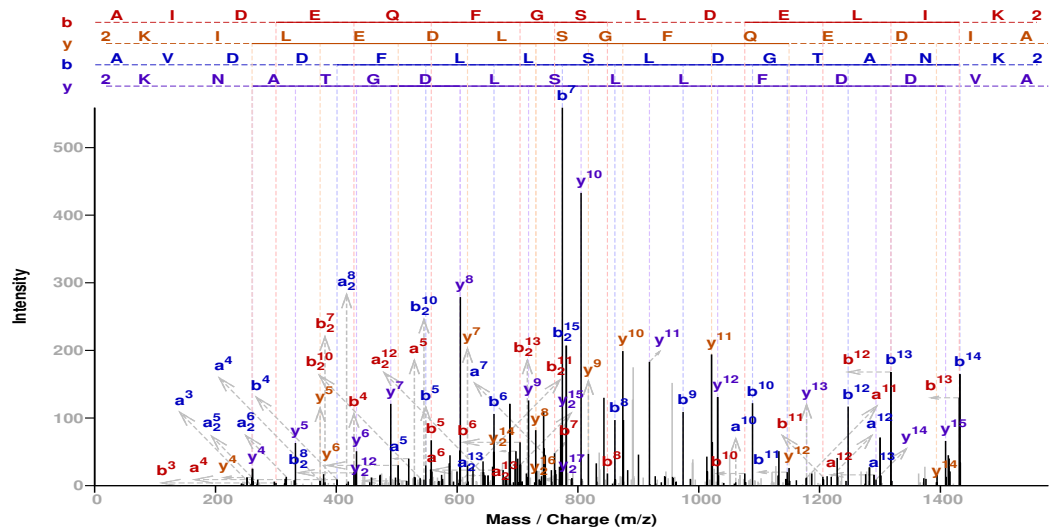

yeast2\_Scan\_Number\_3487 Precursor m/z: 398.530 cosine: 0.793  $\alpha$ : 0.503

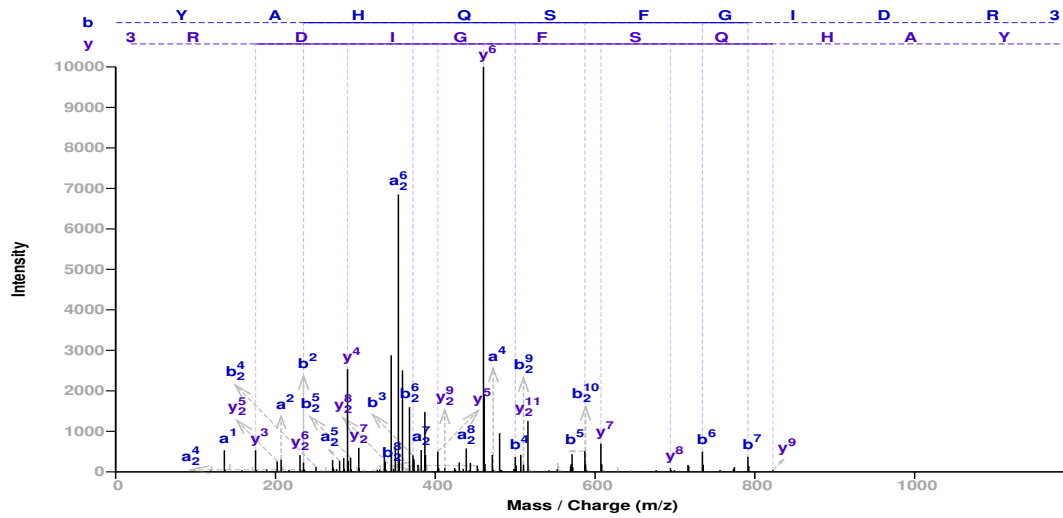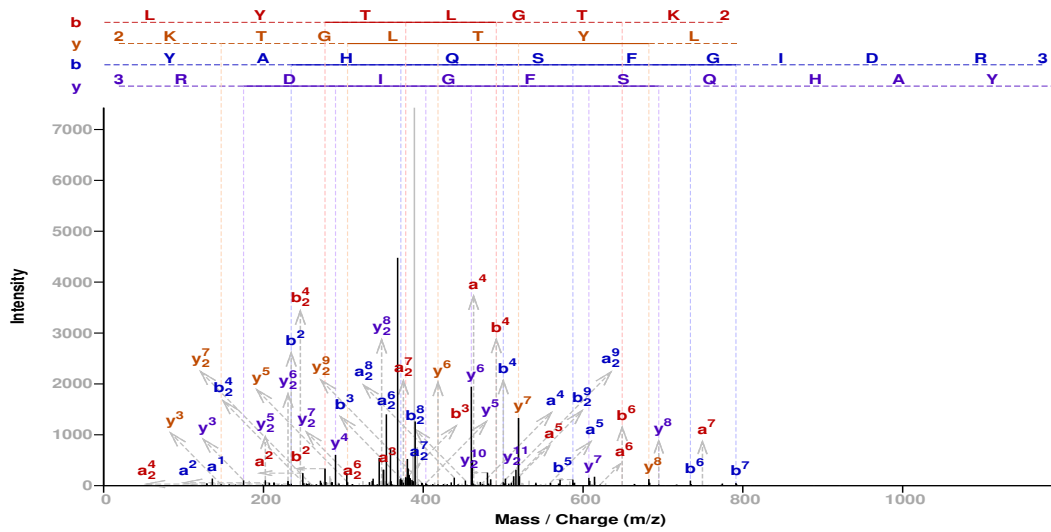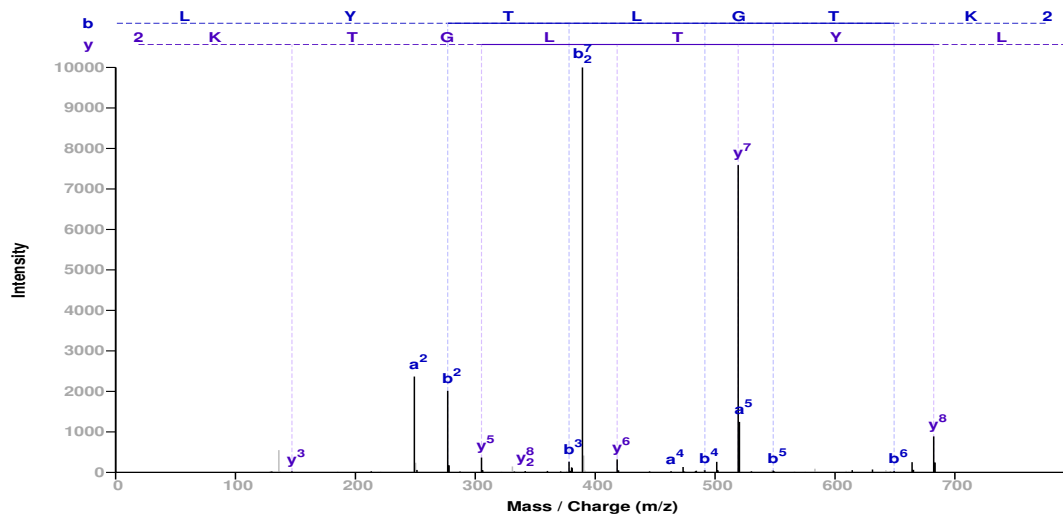

yeast2\_Scan\_Number\_1661 Precursor m/z: 411.232 cosine: 0.918  $\alpha$ : 0.503

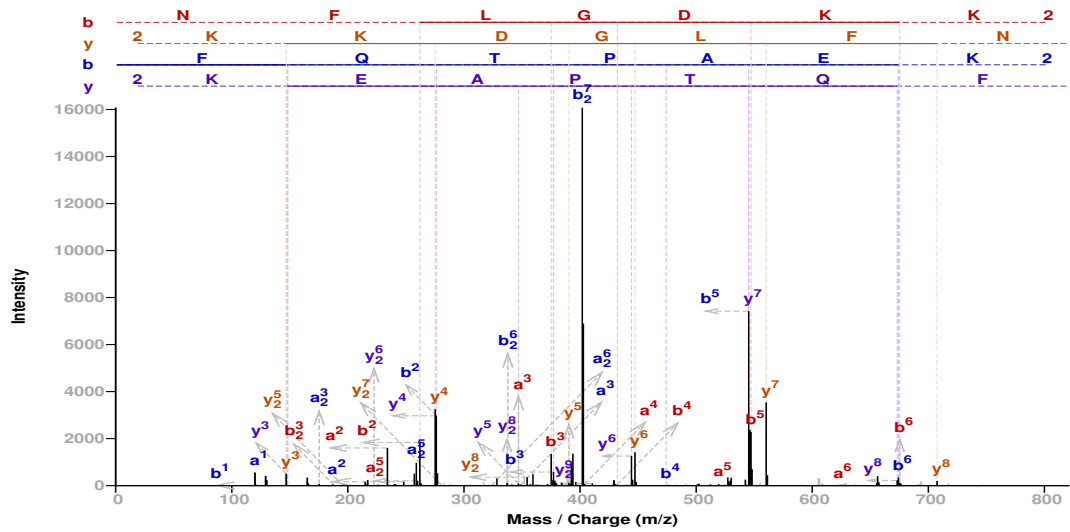

yeast2\_Scan\_Number.1651 Precursor m/z: 443.238 cosine: 0.774  $\alpha$ : 0.501

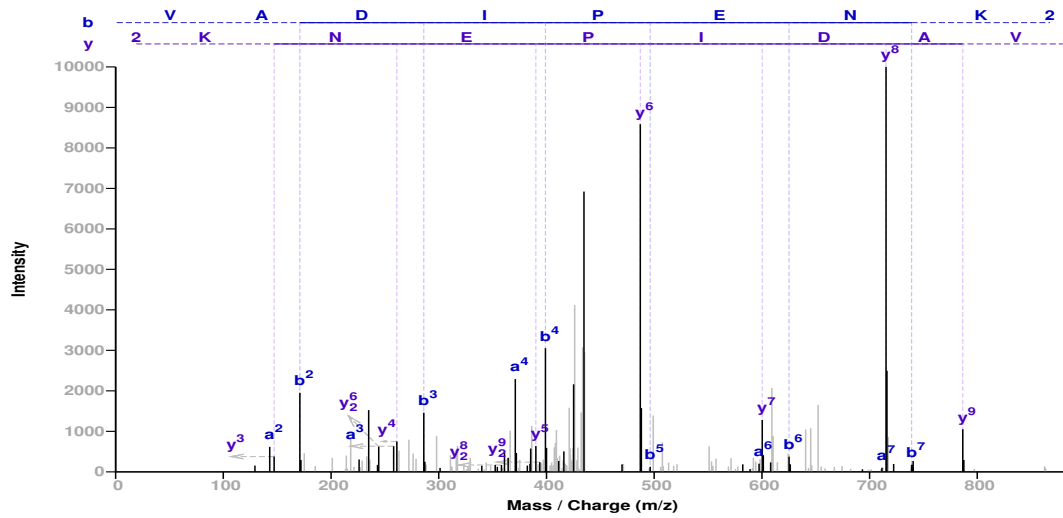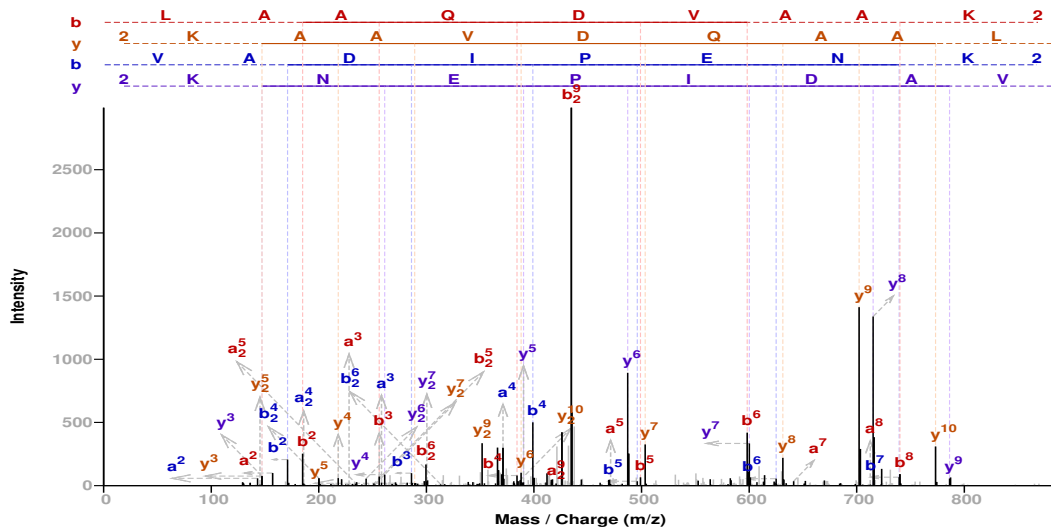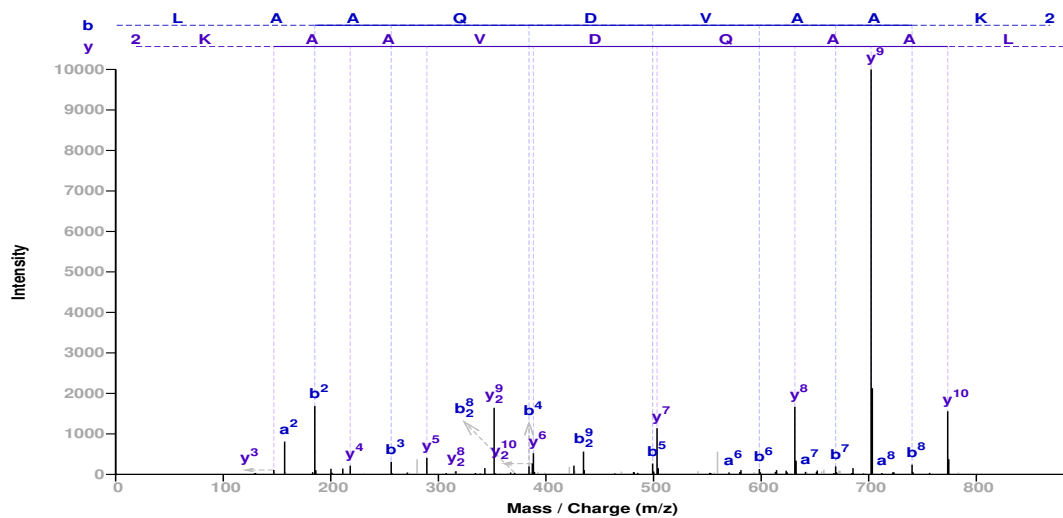

yeast2.Scan\_Number\_1496 Precursor m/z: 433.711 cosine: 0.854  $\alpha$ : 0.499

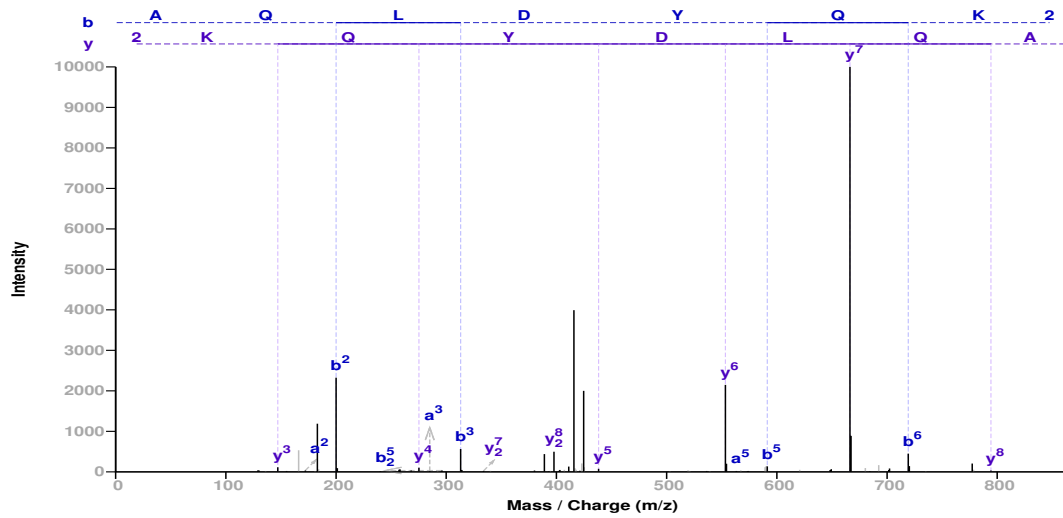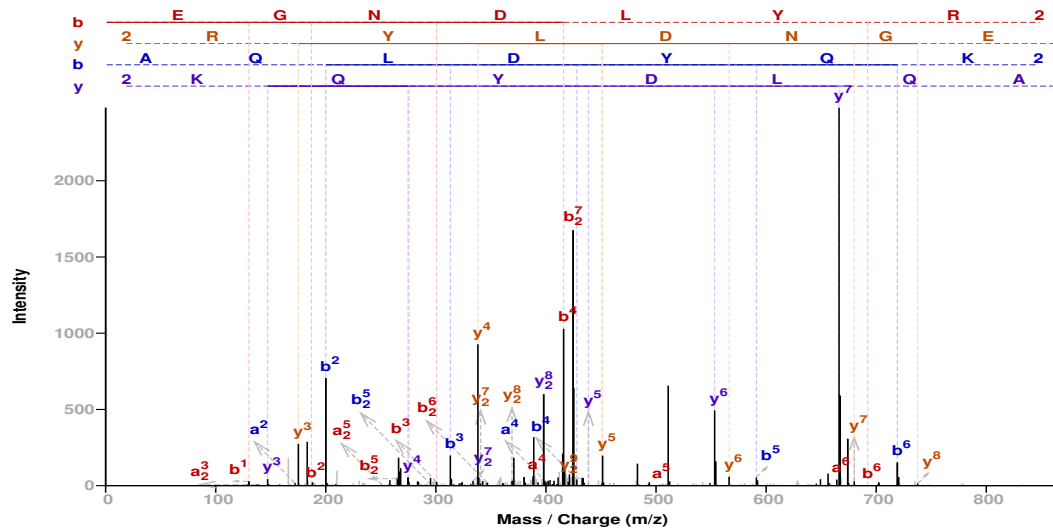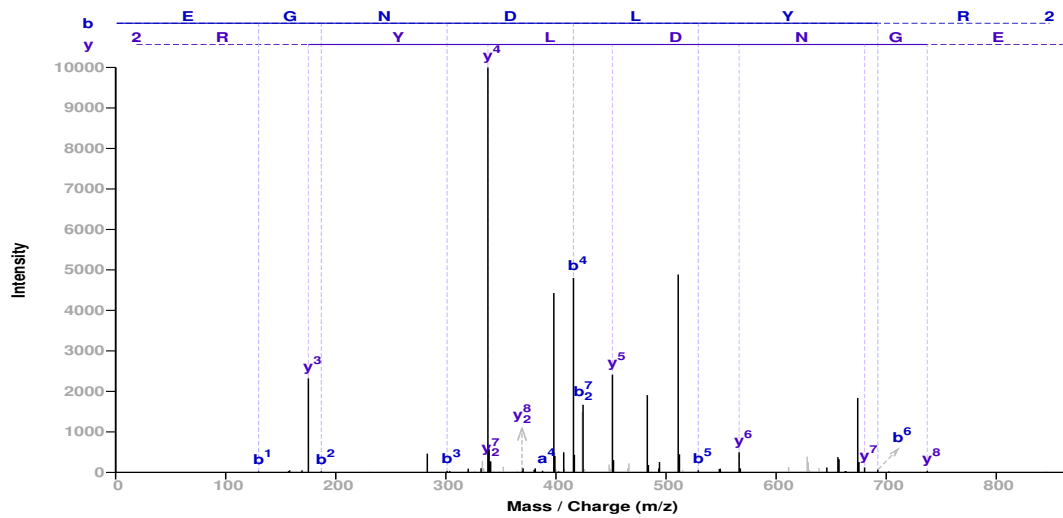



yeast2\_Scan\_Number\_2020 Precursor m/z: 458.560 cosine: 0.741  $\alpha$ : 0.496

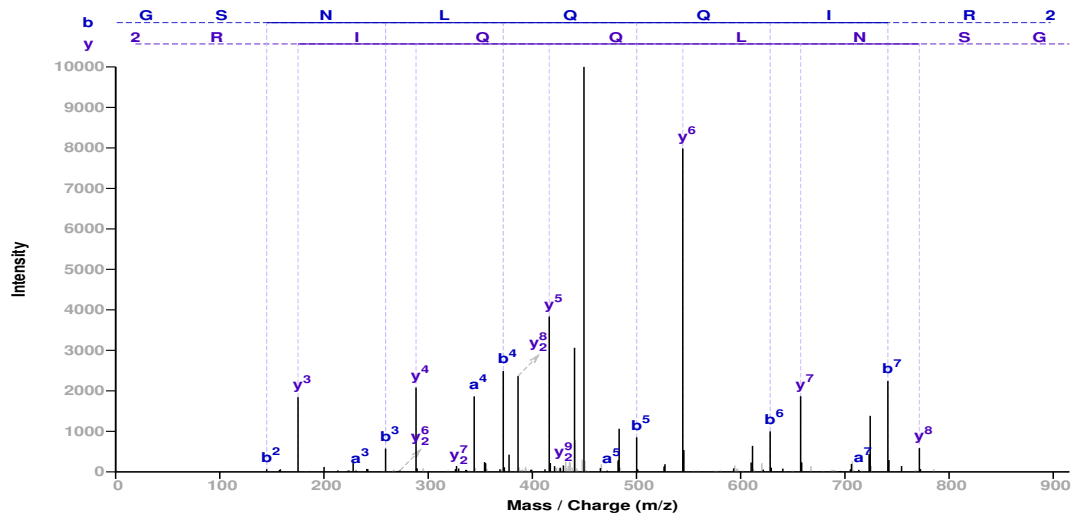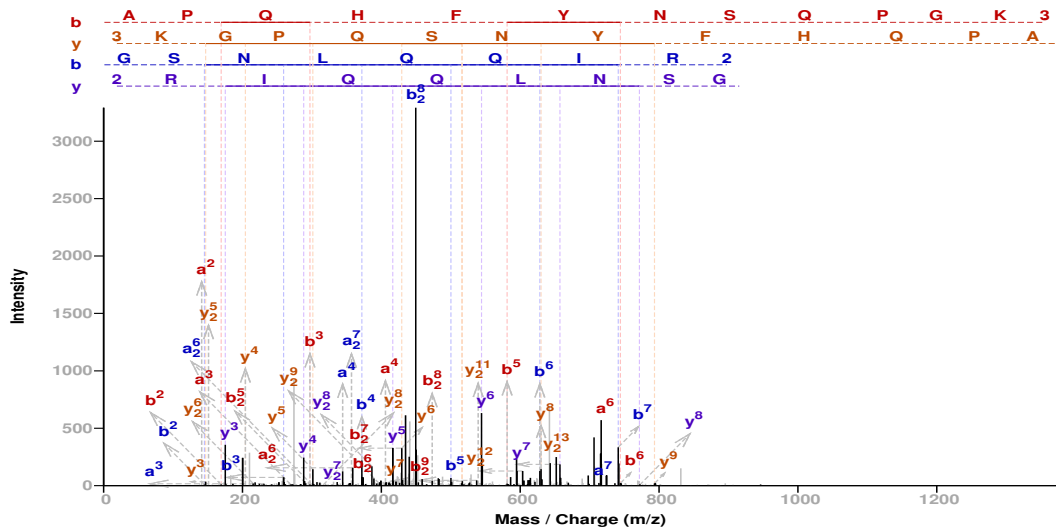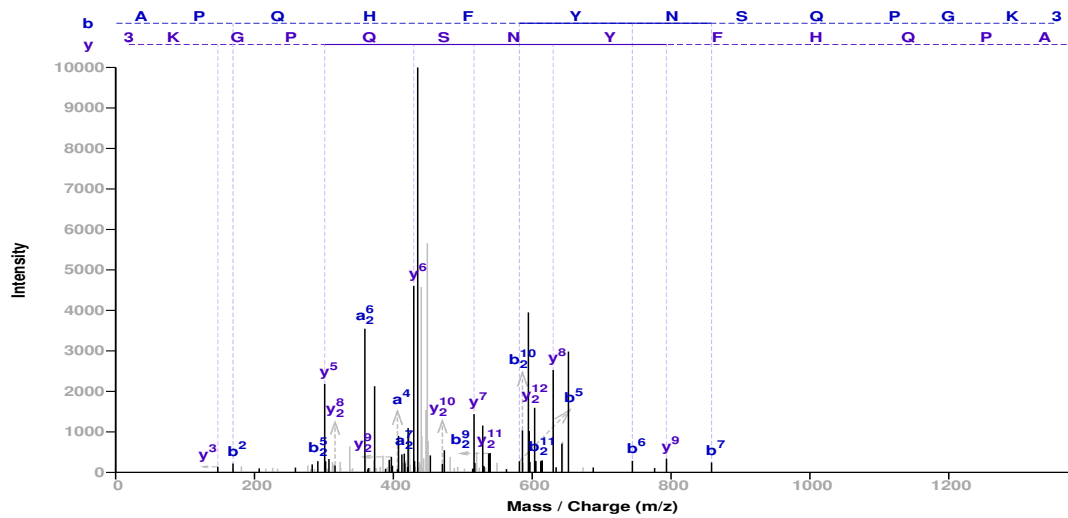

yeast2\_Scan\_Number\_1513 Precursor m/z: 562.727 cosine: 0.882  $\alpha$ : 0.493

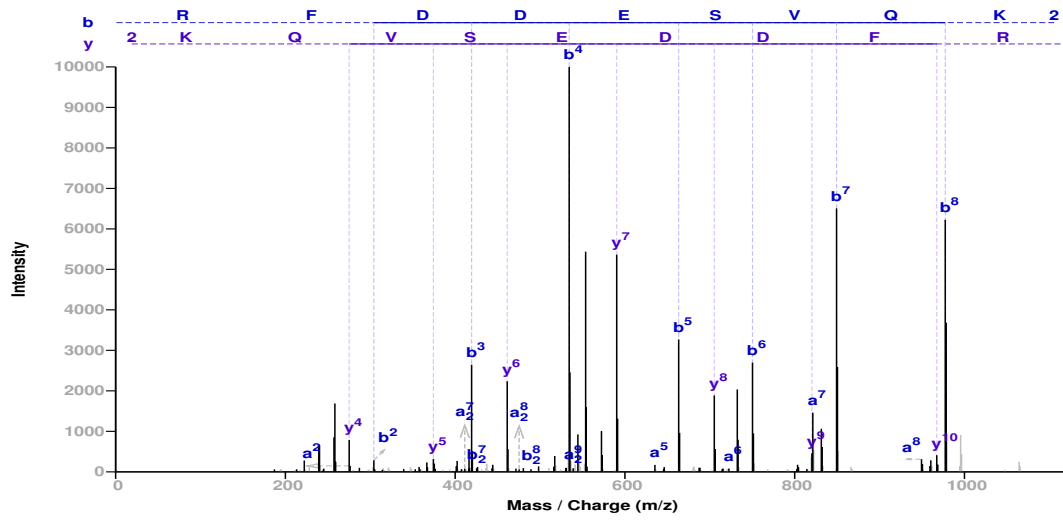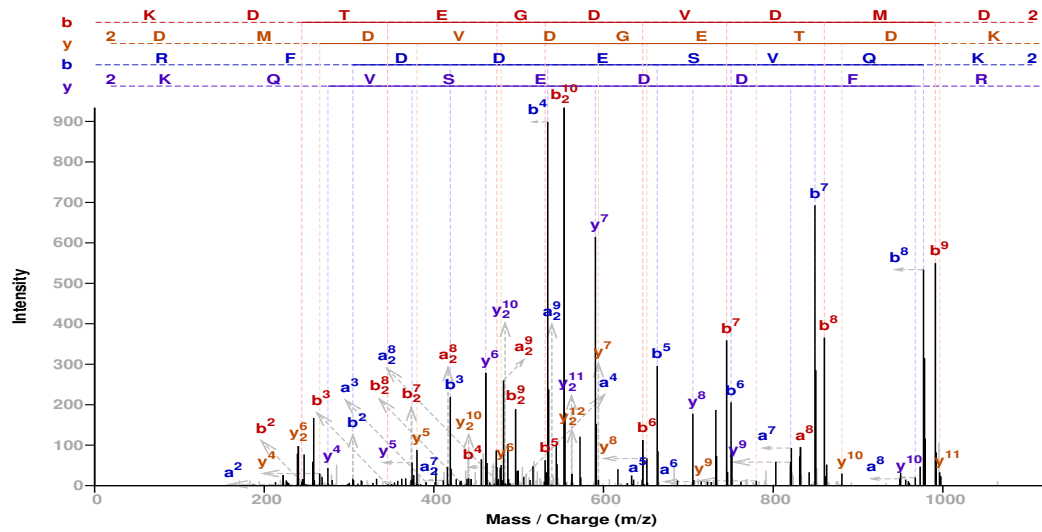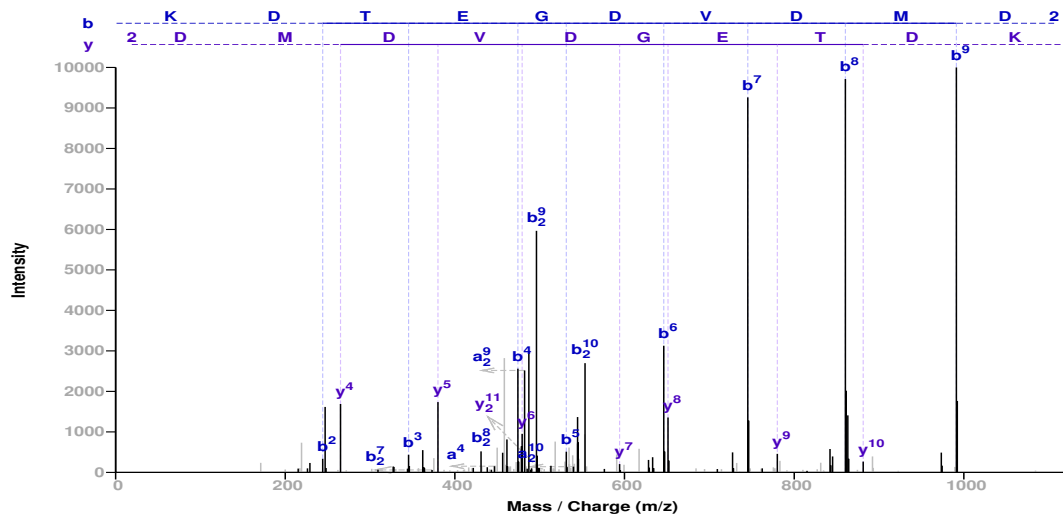

yeast2\_Scan\_Number\_676 Precursor m/z: 344.699 cosine: 0.904  $\alpha$ : 0.493

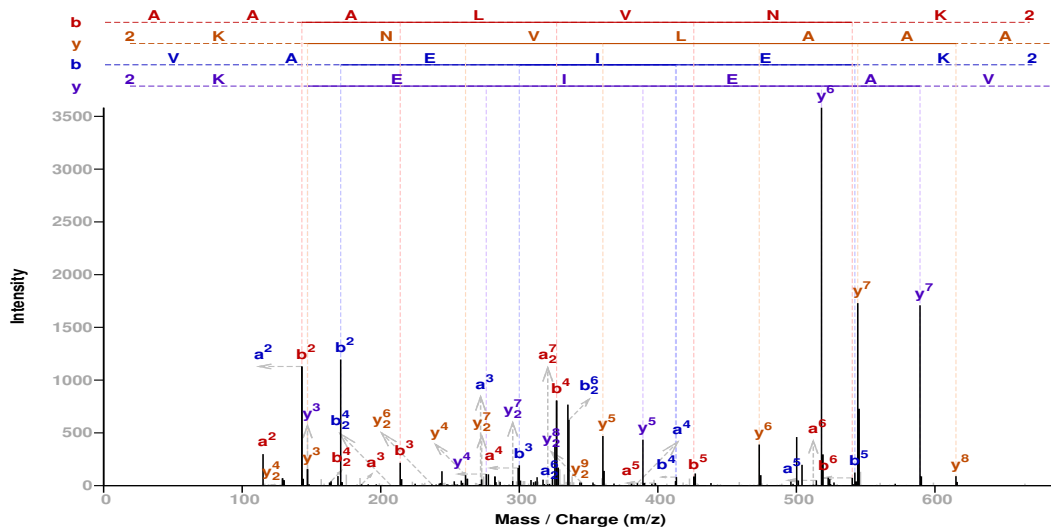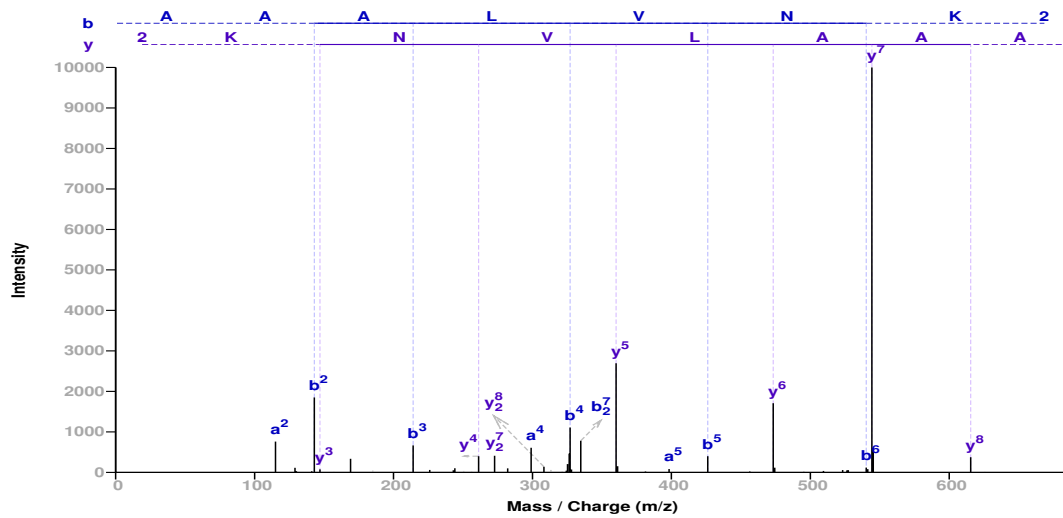

yeast2\_Scan\_Number\_6339 Precursor m/z: 722.891 cosine: 0.830  $\alpha$ : 0.487

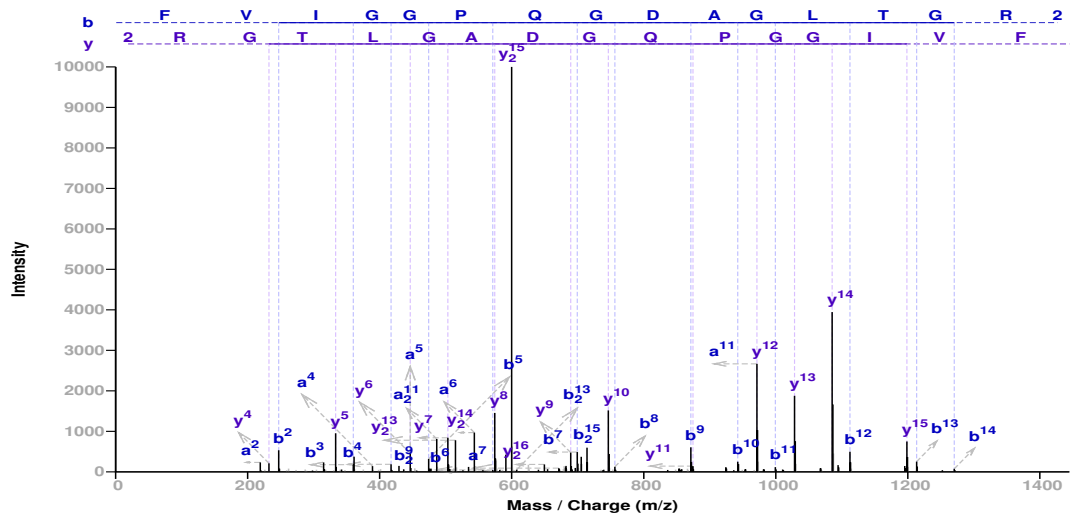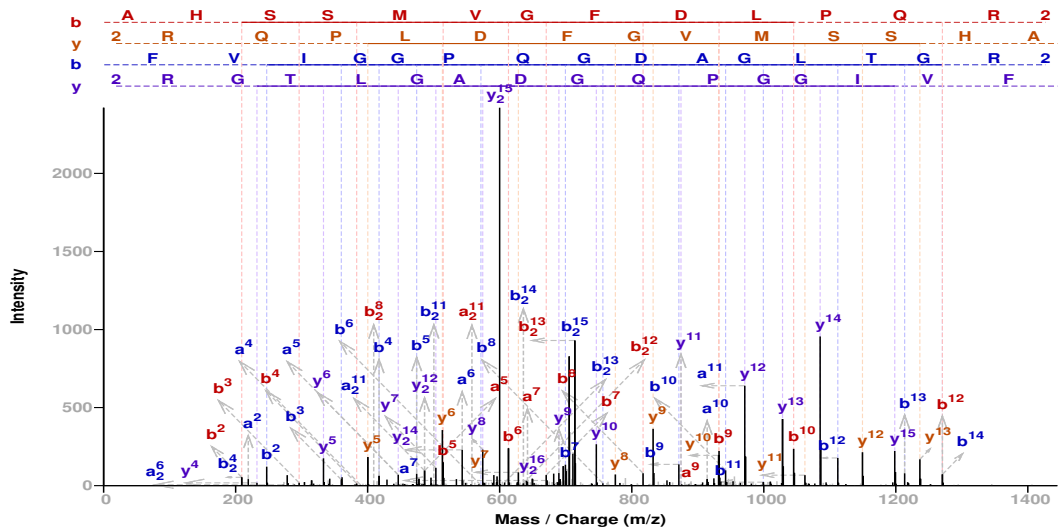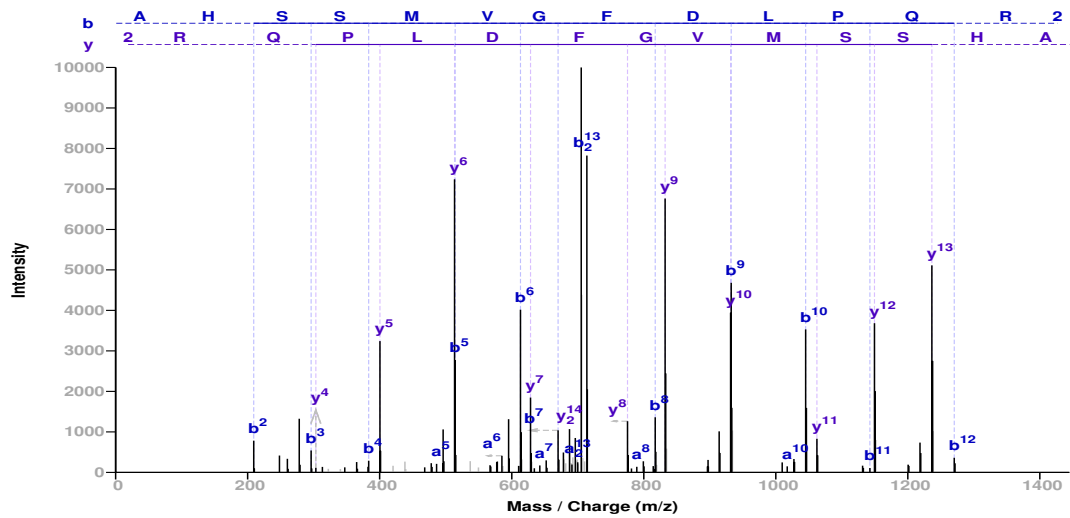



yeast2.Scan\_Number.2033 Precursor m/z: 486.774 cosine: 0.741  $\alpha$ : 0.478

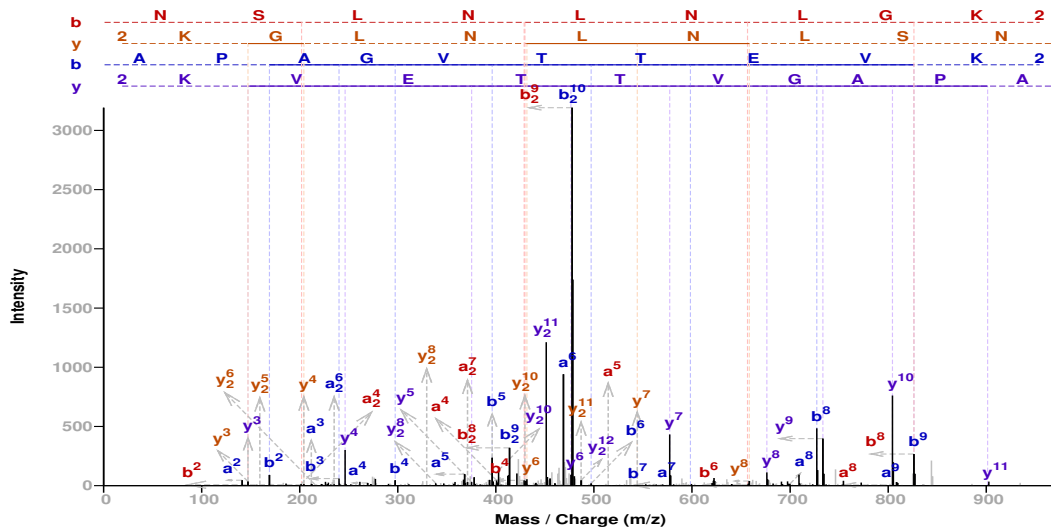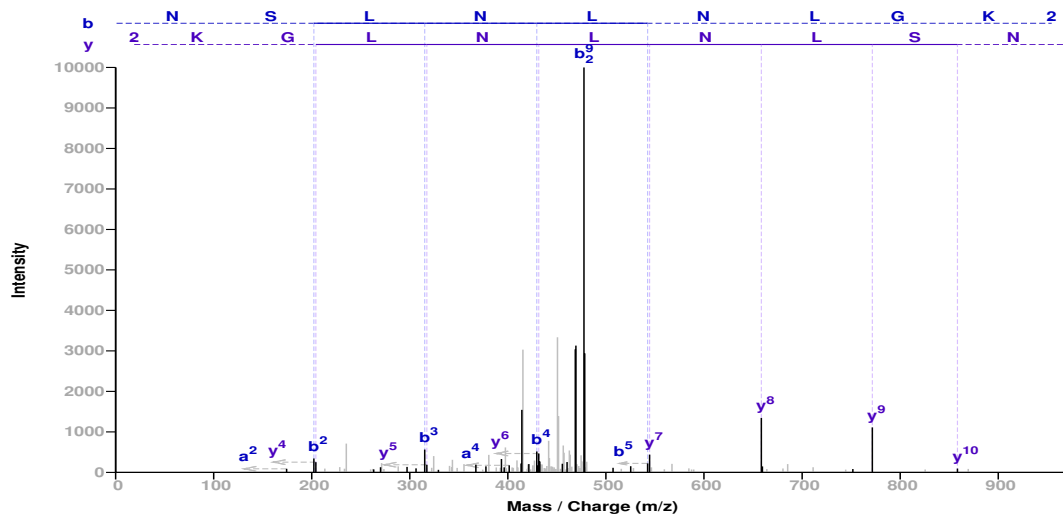

yeast2.Scan\_Number.1418 Precursor m/z: 466.750 cosine: 0.831  $\alpha$ : 0.475

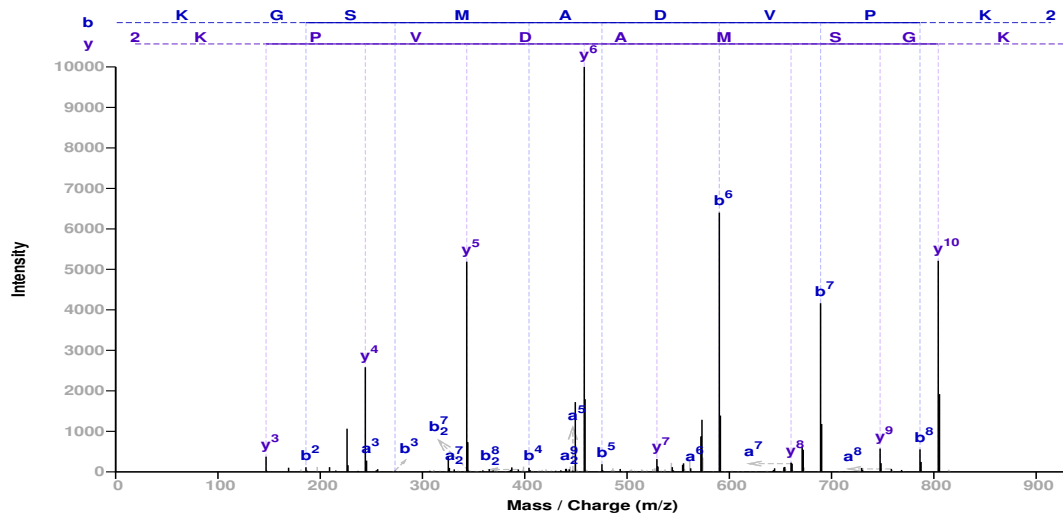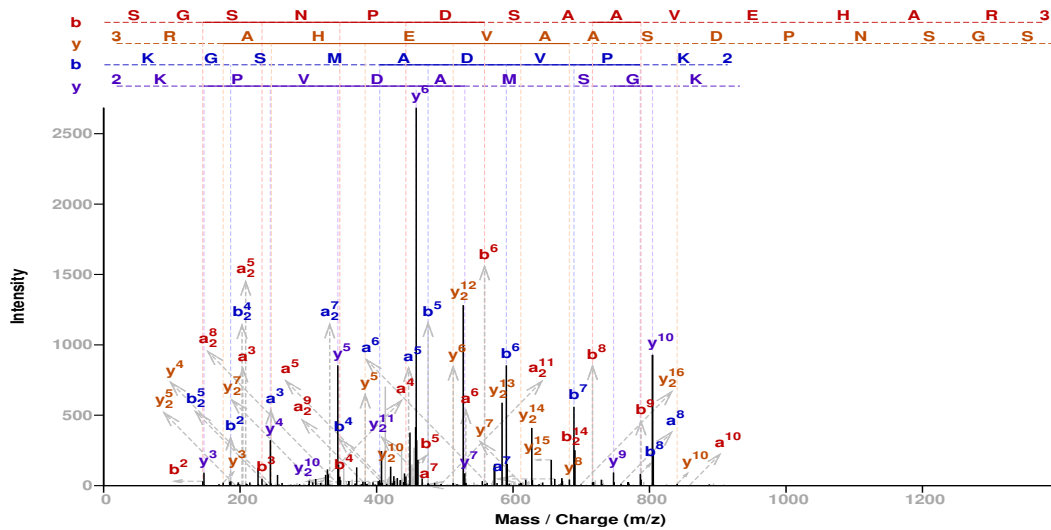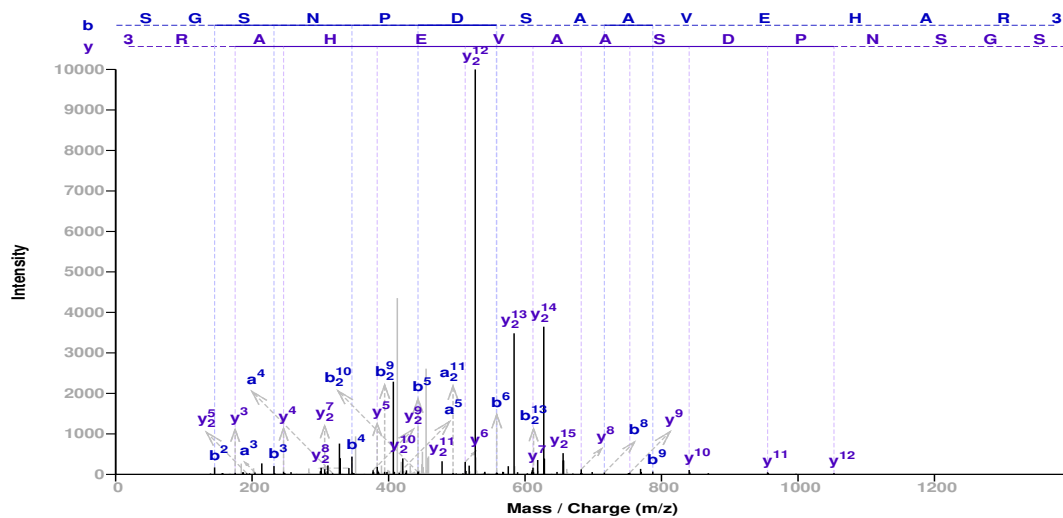

yeast2.Scan\_Number\_2553 Precursor m/z: 527.274 cosine: 0.736  $\alpha$ : 0.458

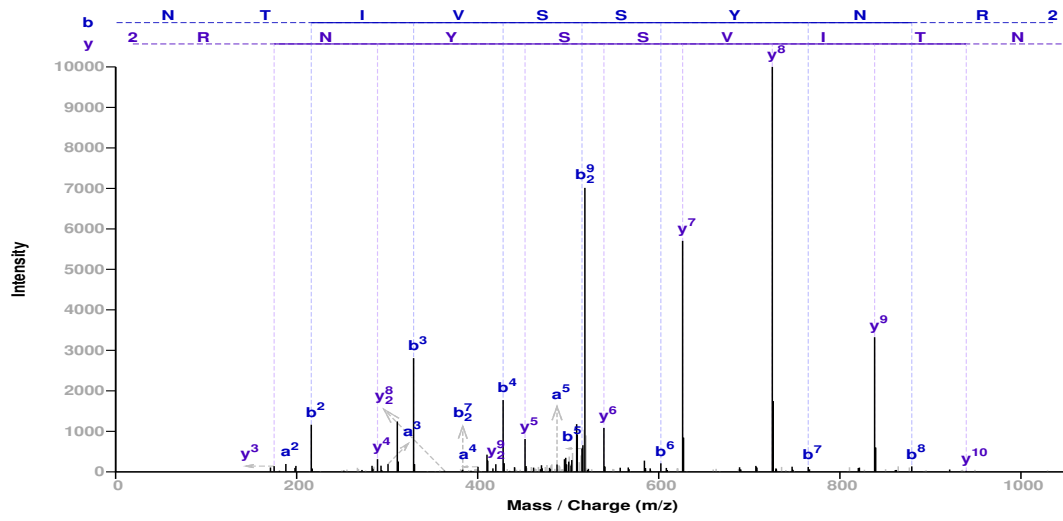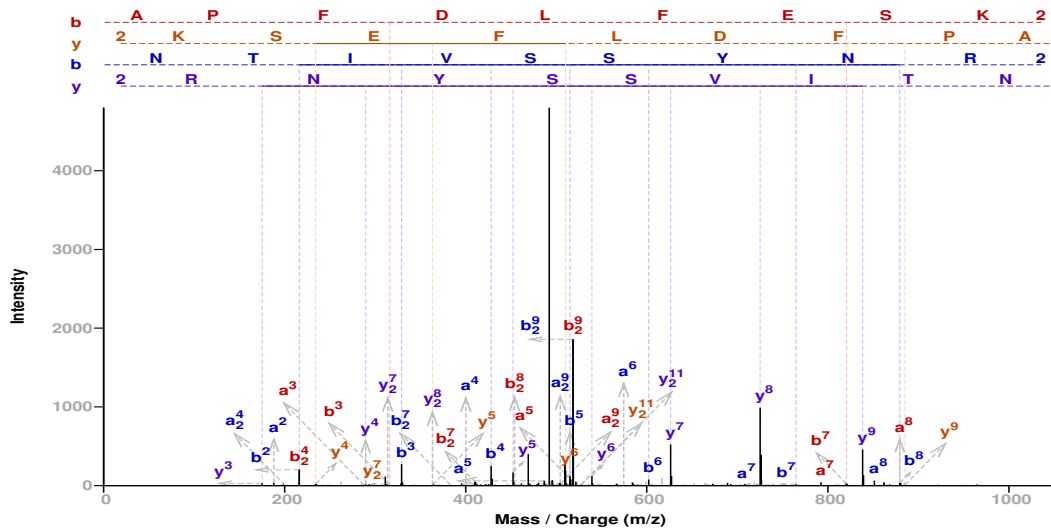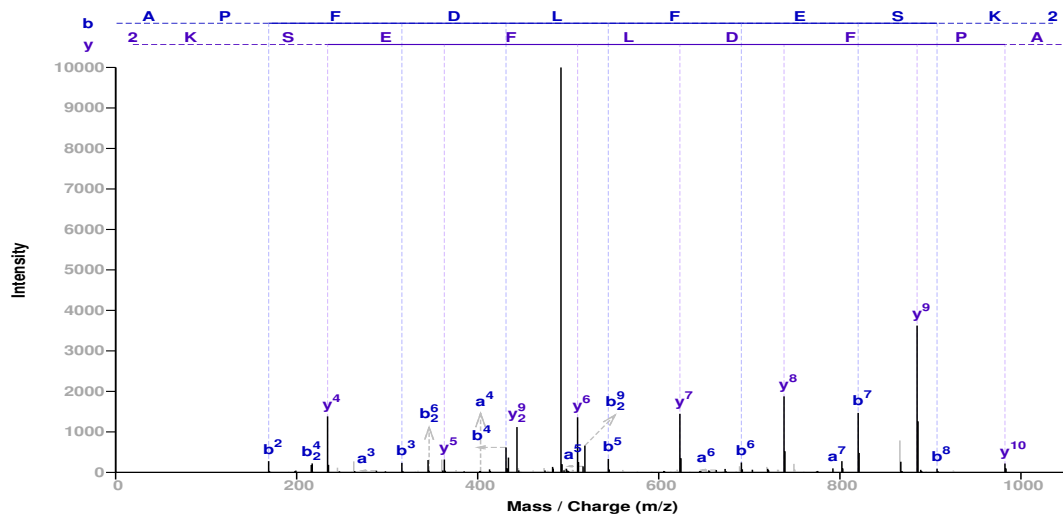



yeast2\_Scan\_Number\_2046 Precursor m/z: 690.338 cosine: 0.800  $\alpha$ : 0.455

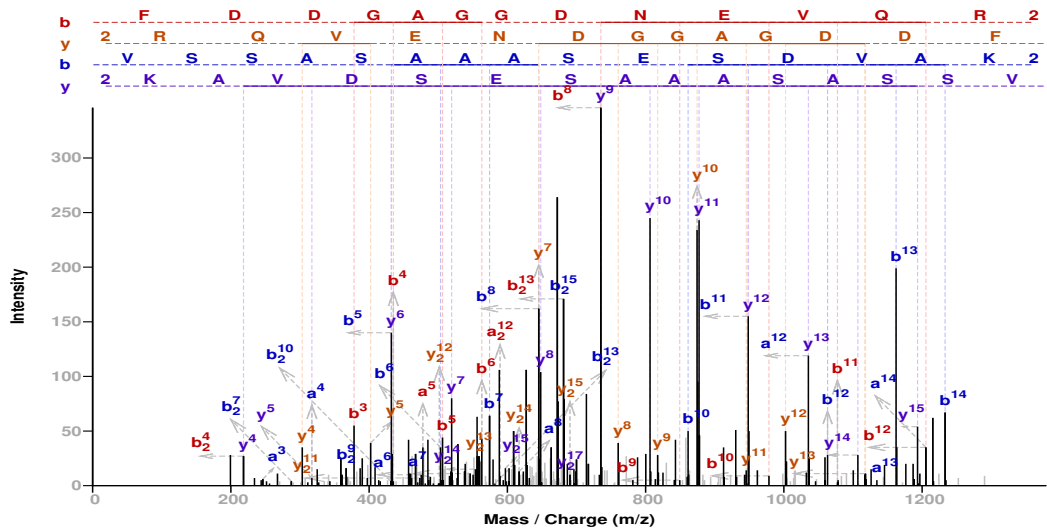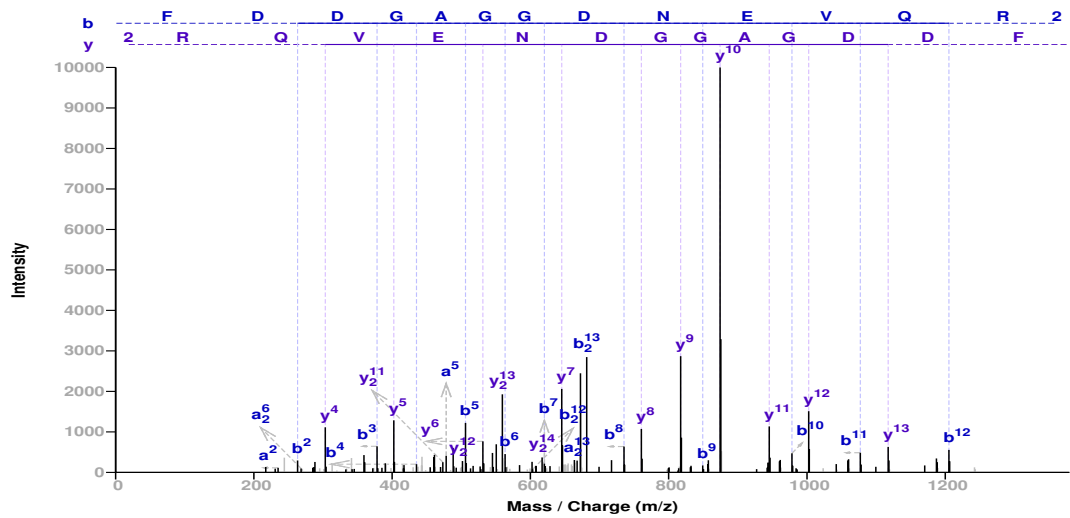

yeast2.Scan\_Number\_2448 Precursor m/z: 424.730 cosine: 0.832  $\alpha$ : 0.453

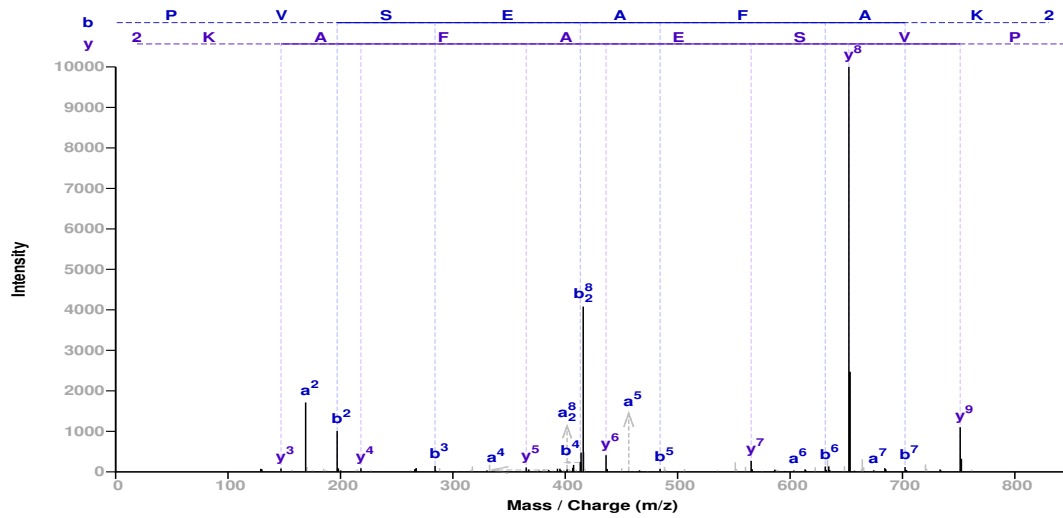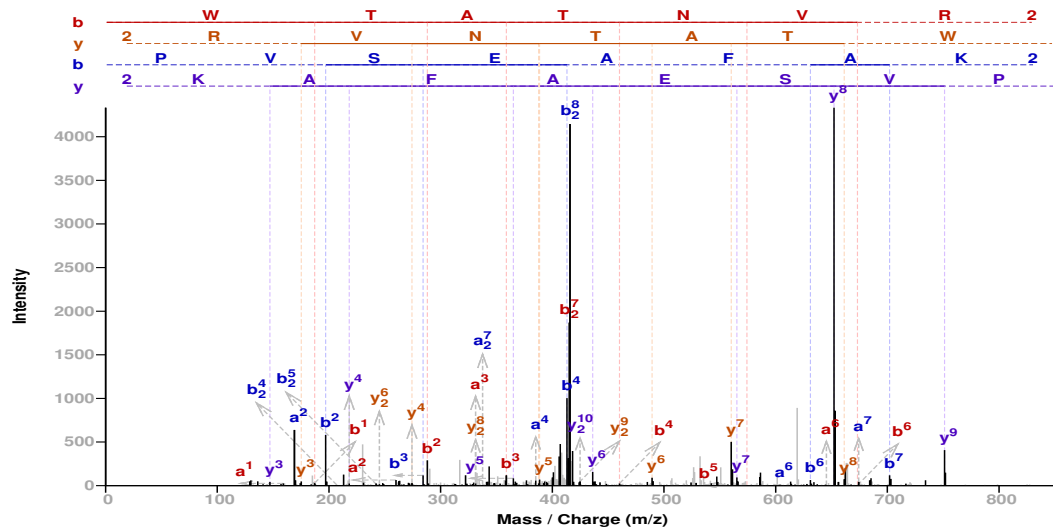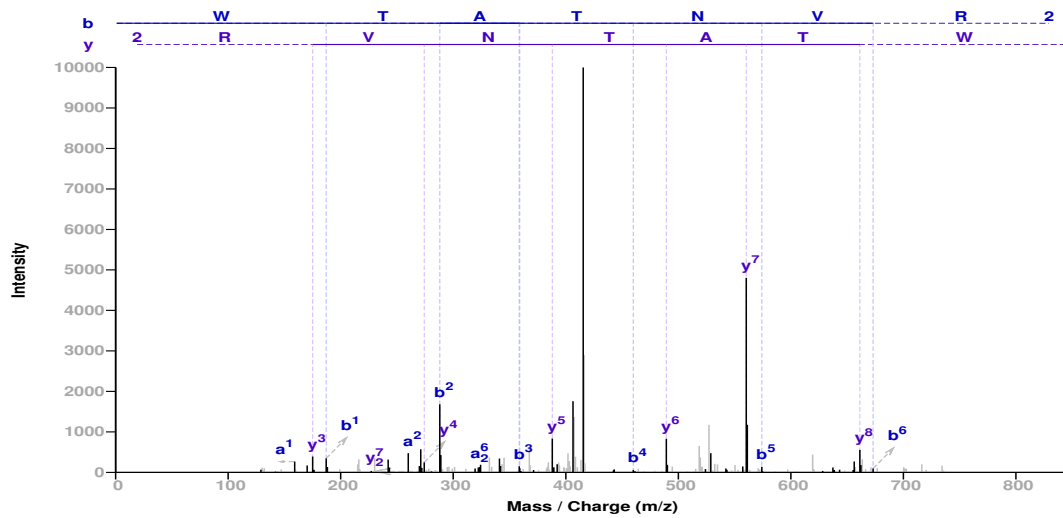

yeast2\_Scan\_Number\_1557 Precursor m/z: 466.251 cosine: 0.864  $\alpha$ : 0.449

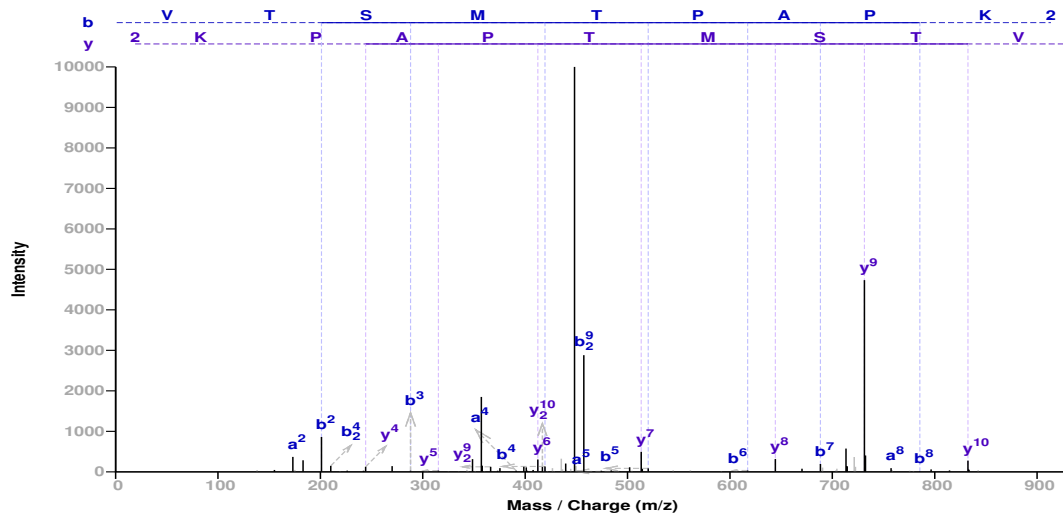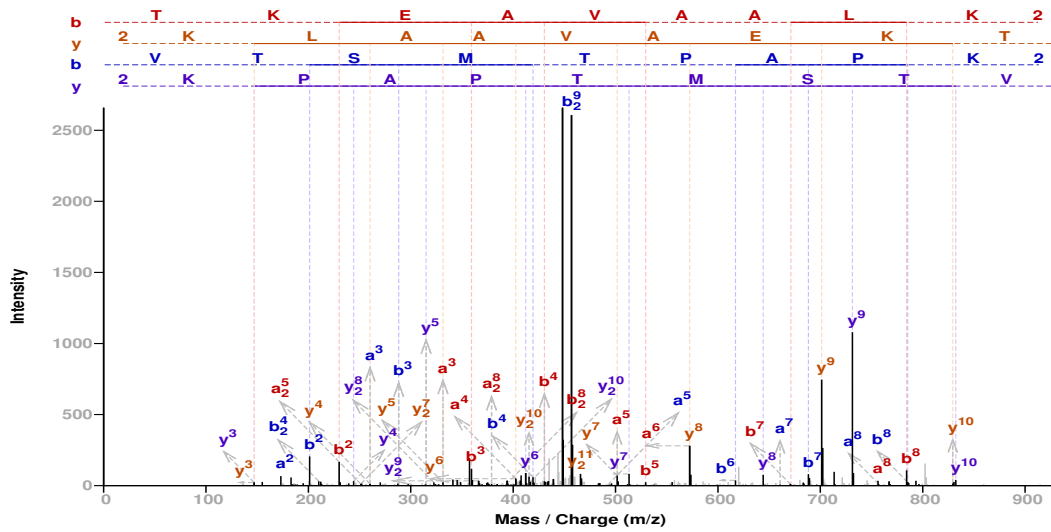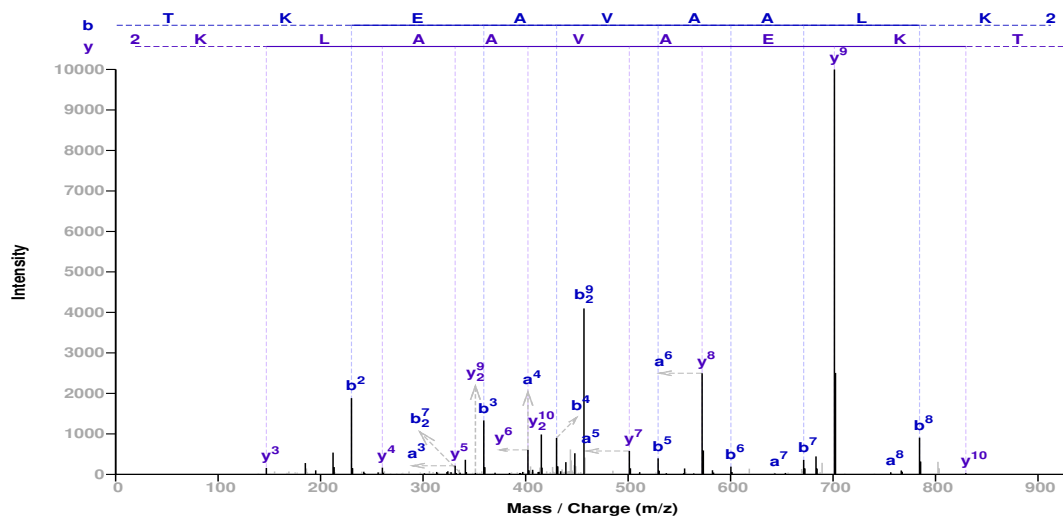



yeast2\_Scan\_Number\_3272 Precursor m/z: 380.510 cosine: 0.830  $\alpha$ : 0.447

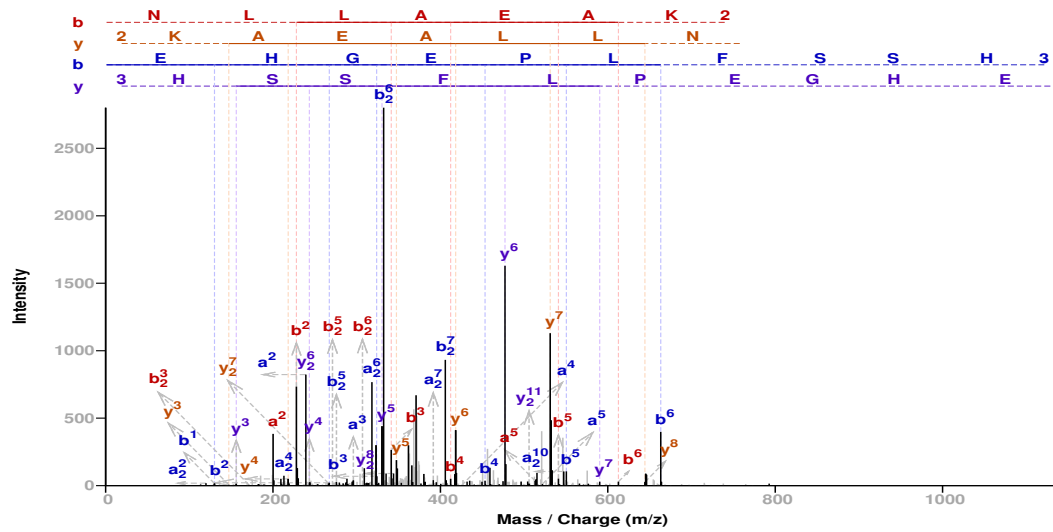



yeast2\_Scan\_Number\_7179 Precursor m/z: 406.570 cosine: 0.821  $\alpha$ : 0.431

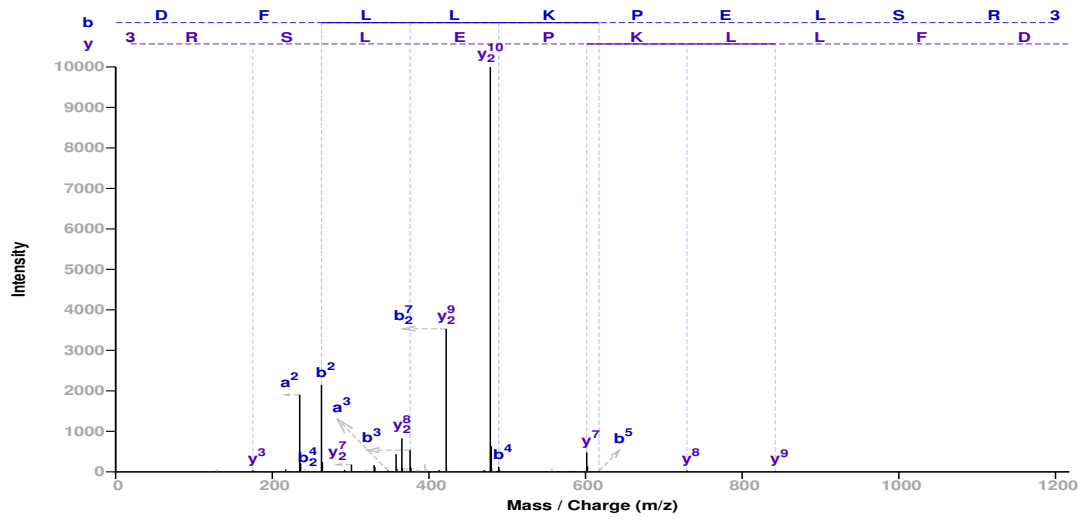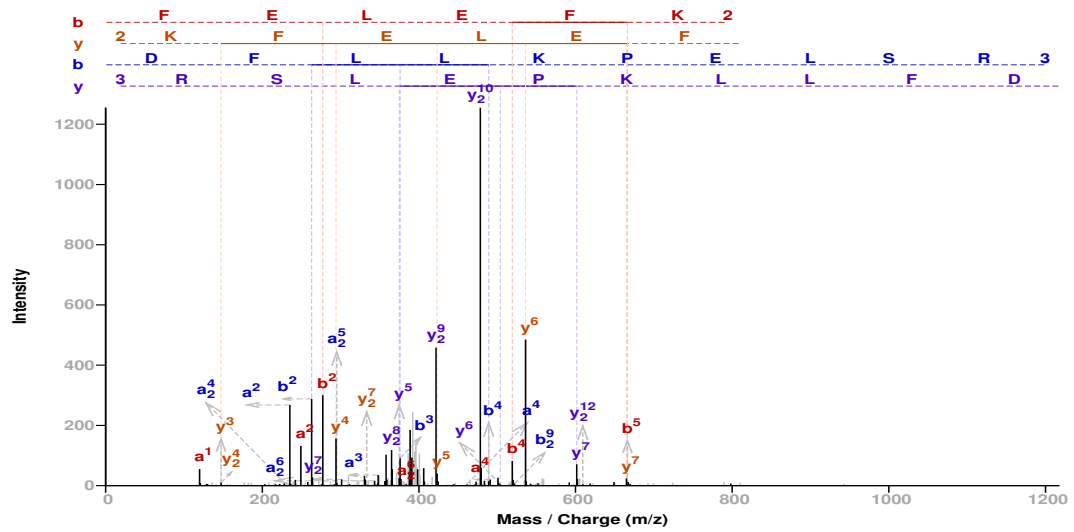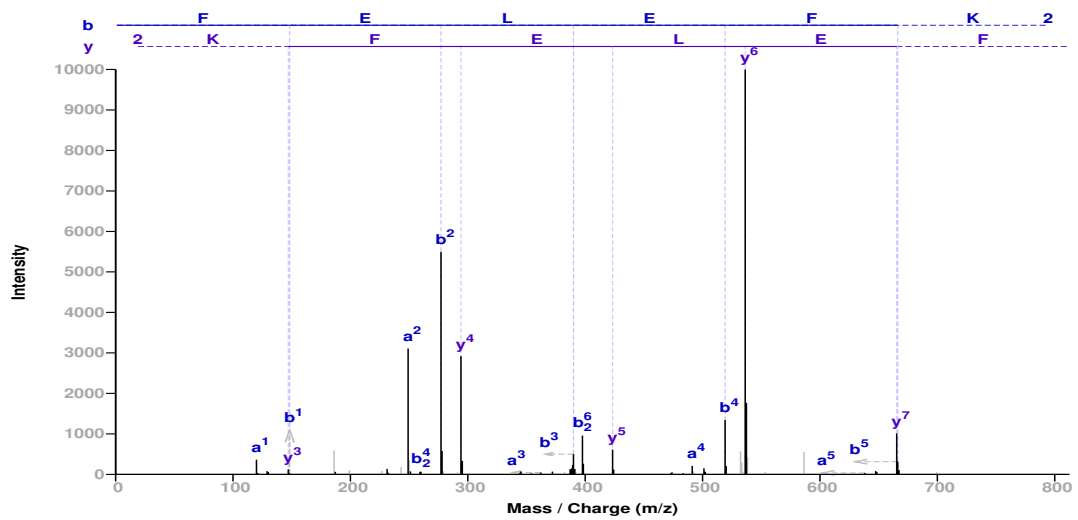

yeast2\_Scan\_Number\_4776 Precursor m/z: 466.738 cosine: 0.784  $\alpha$ : 0.430

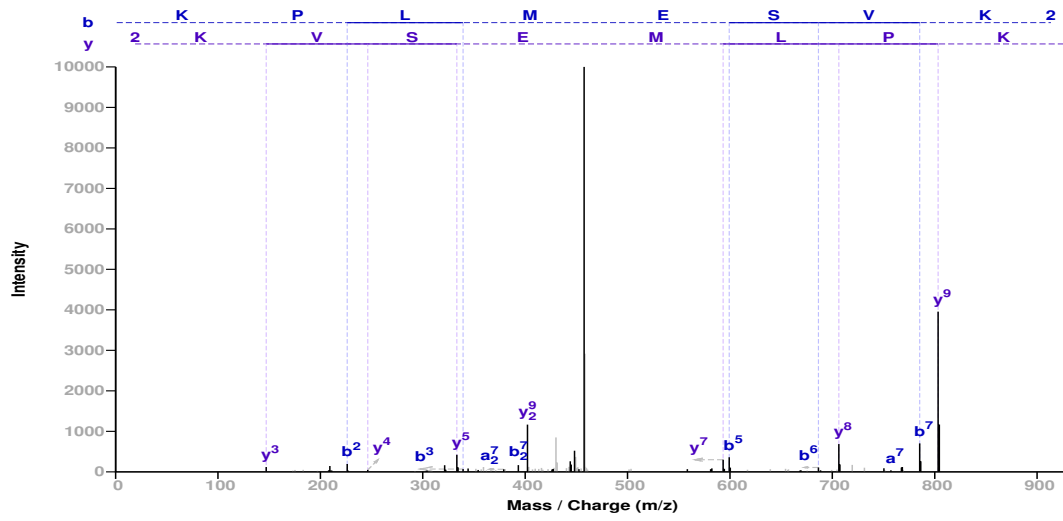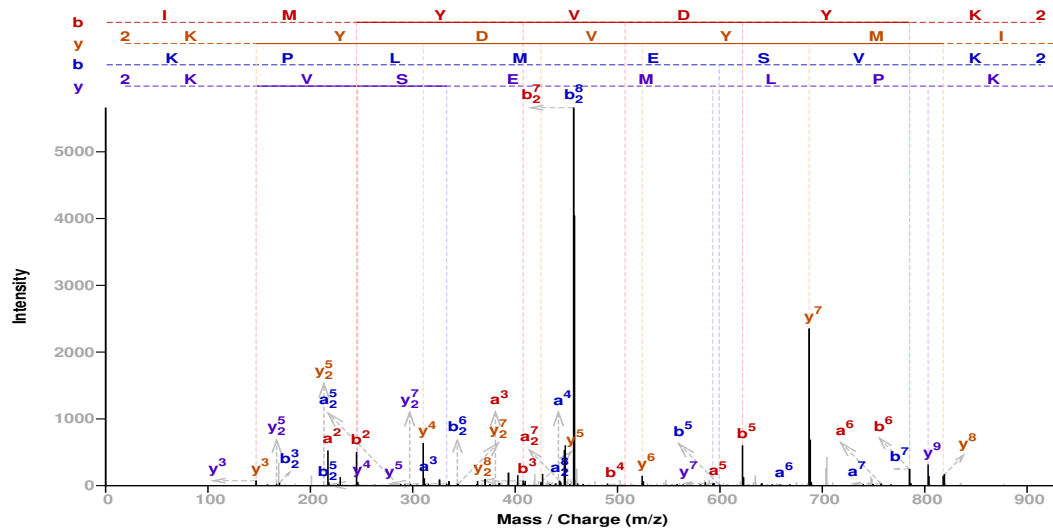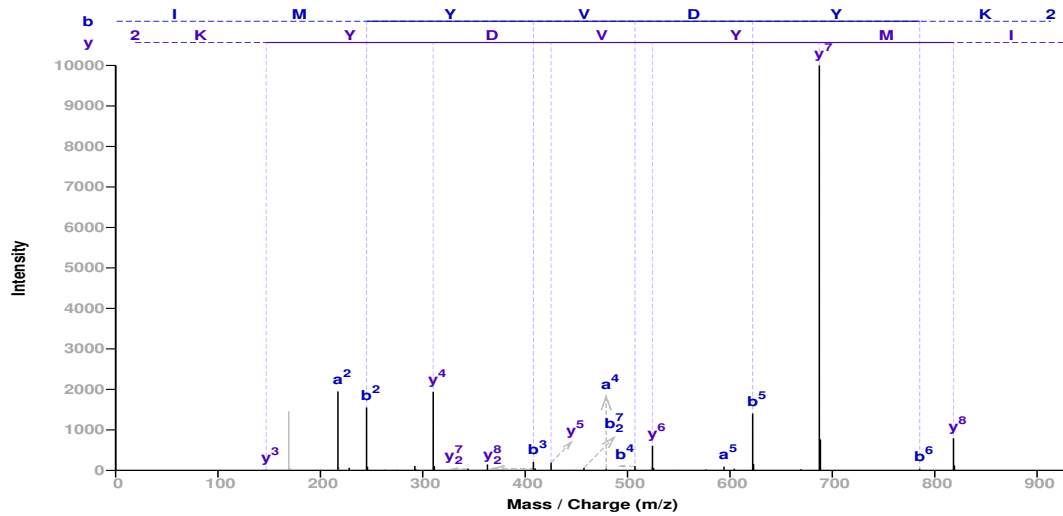



yeast2.Scan\_Number\_3664 Precursor m/z: 435.214 cosine: 0.820  $\alpha$ : 0.429

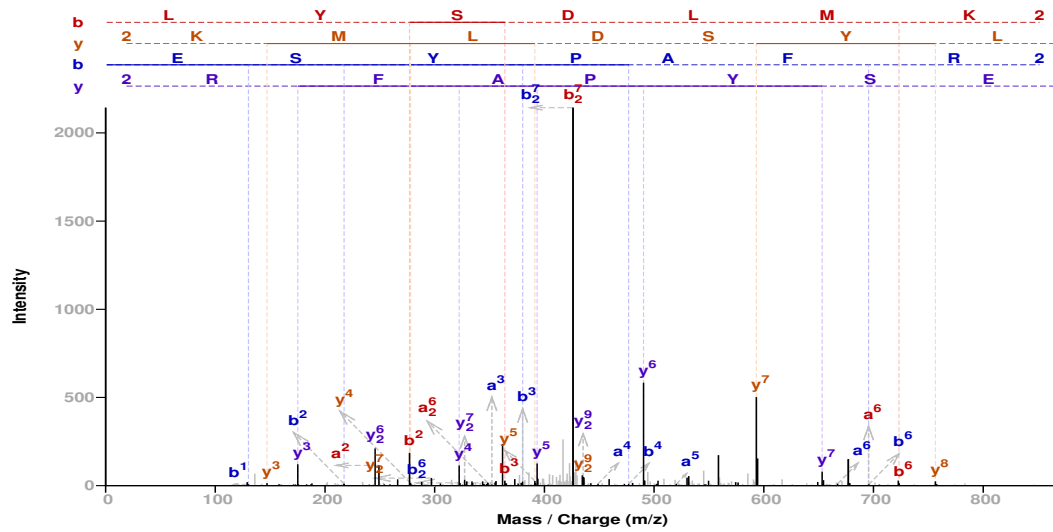

yeast2.Scan.Number.2830 Precursor m/z: 521.618 cosine: 0.809  $\alpha$ : 0.428

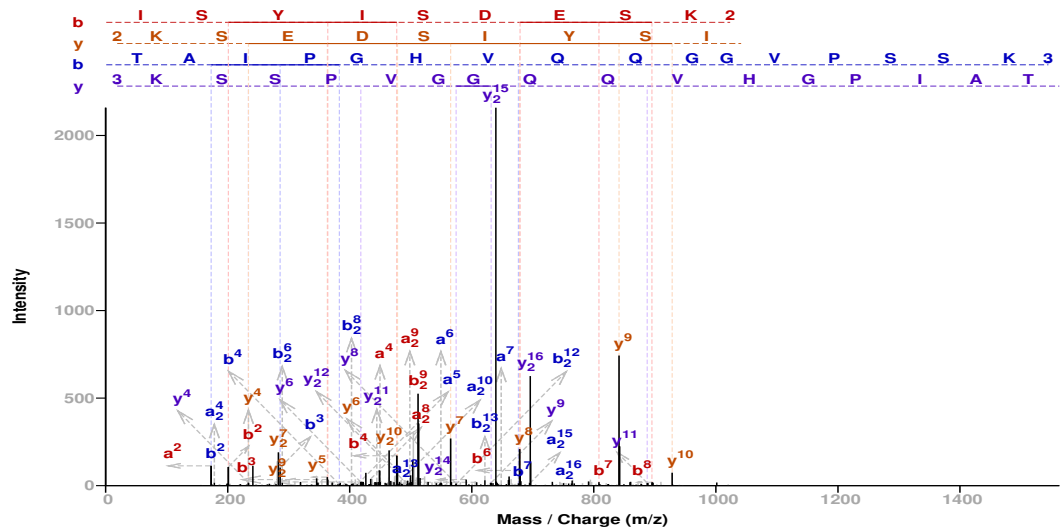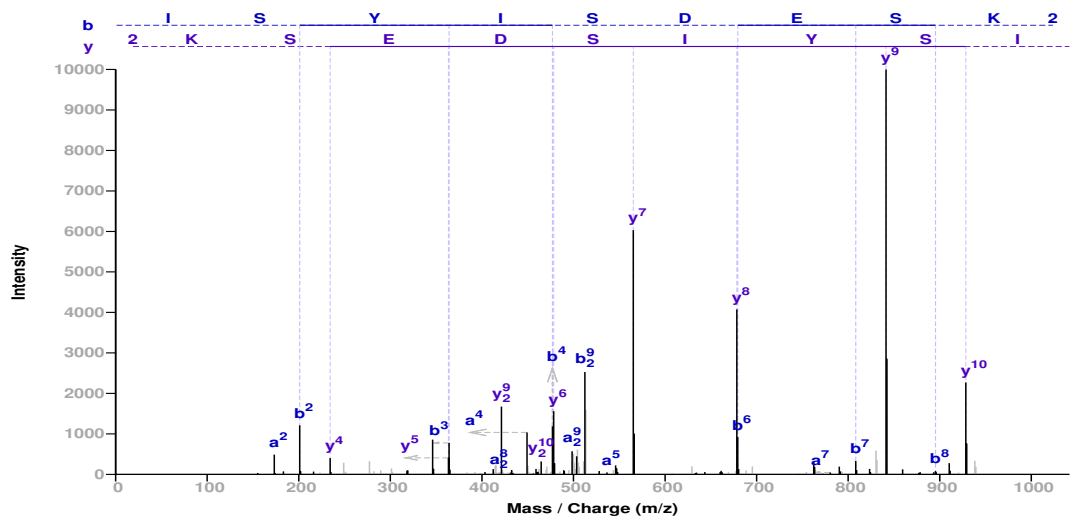

yeast2\_Scan\_Number\_1099 Precursor m/z: 406.552 cosine: 0.875  $\alpha$ : 0.417

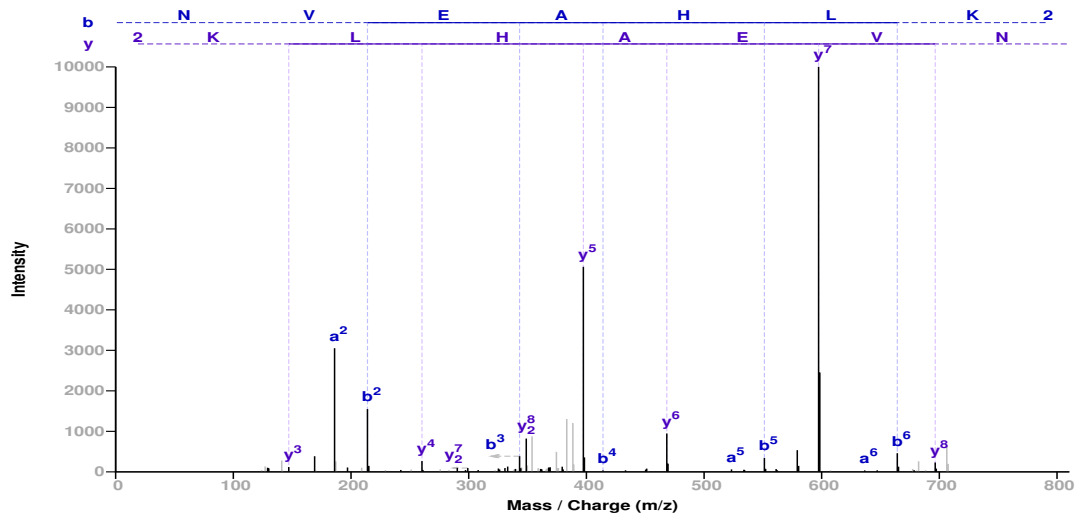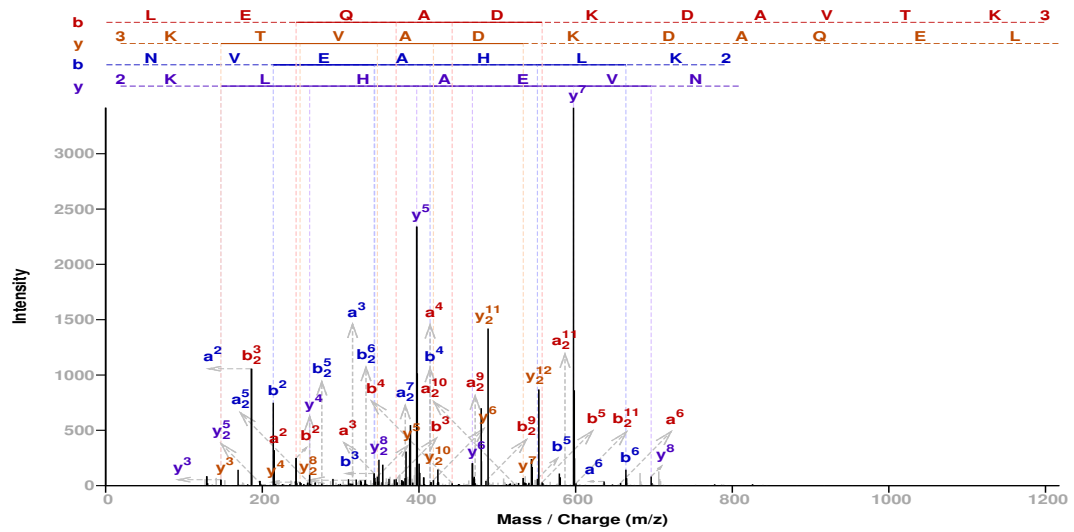

yeast2.Scan\_Number.1408 Precursor m/z: 396.718 cosine: 0.794  $\alpha$ : 0.415

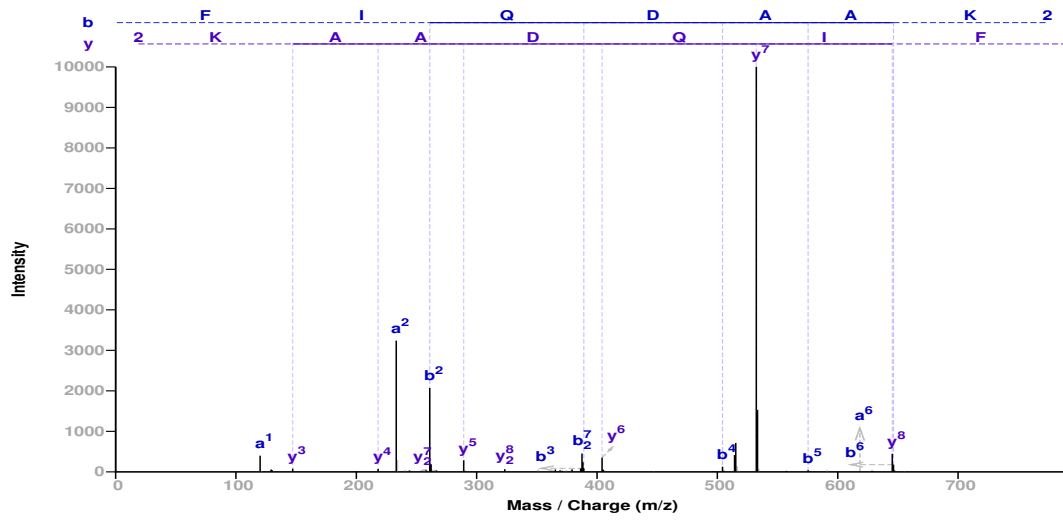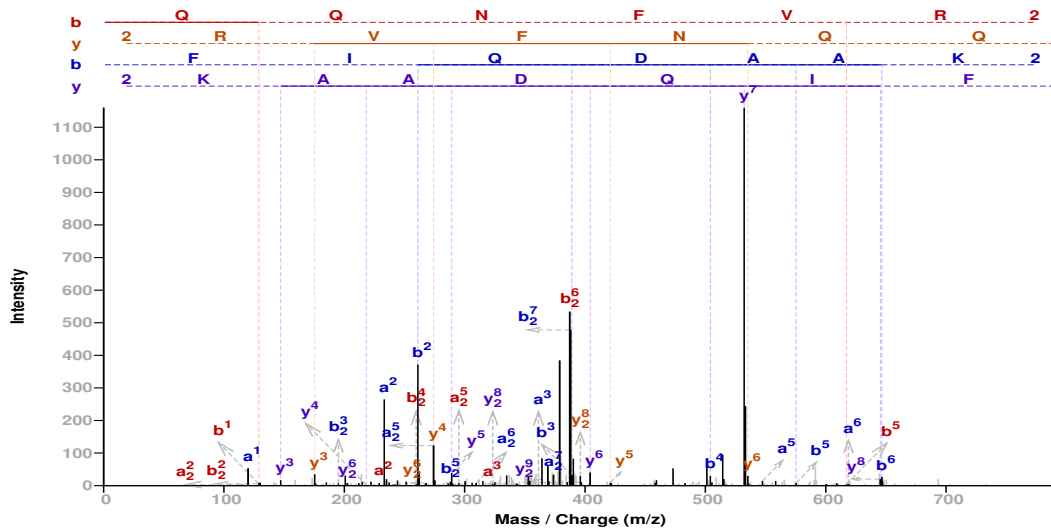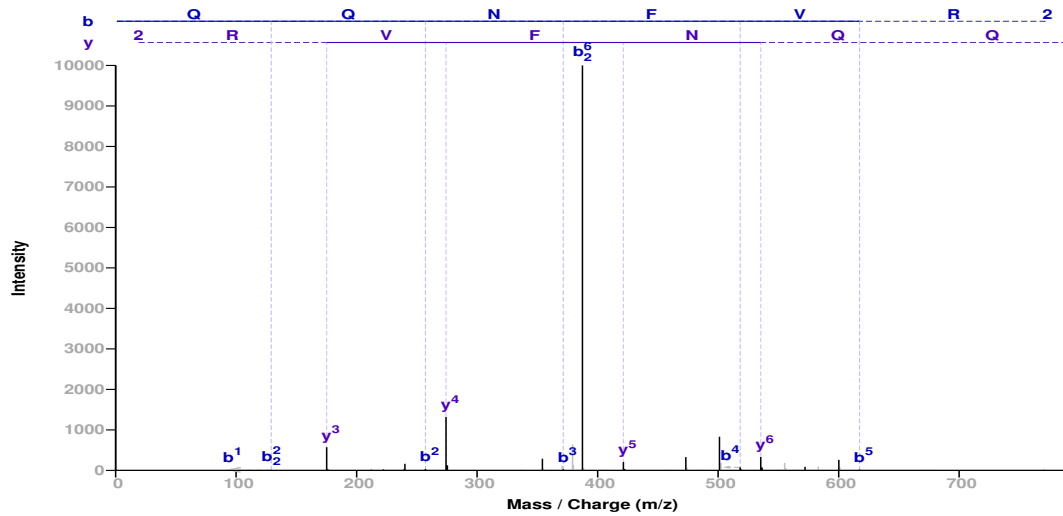

yeast2.Scan\_Number\_6411 Precursor m/z: 561.276 cosine: 0.779  $\alpha$ : 0.406

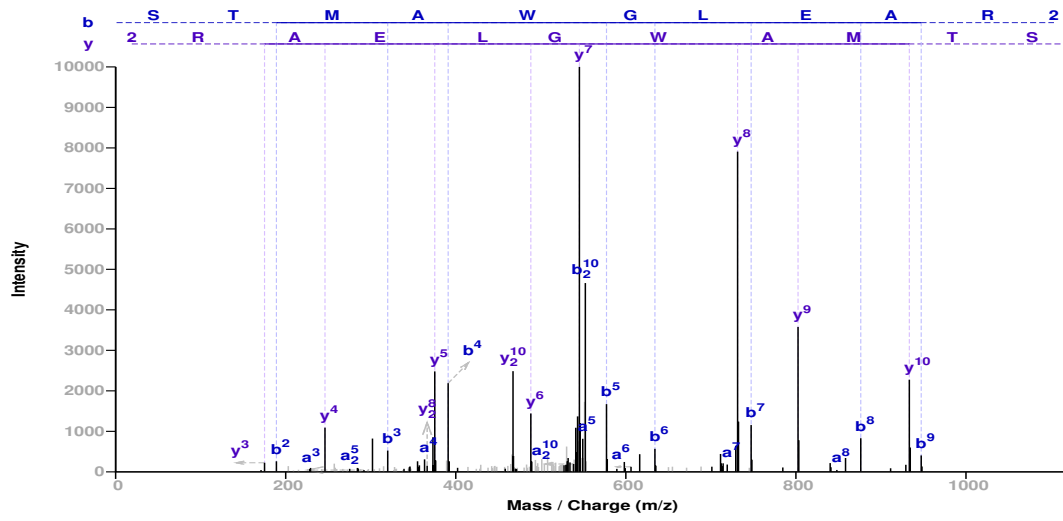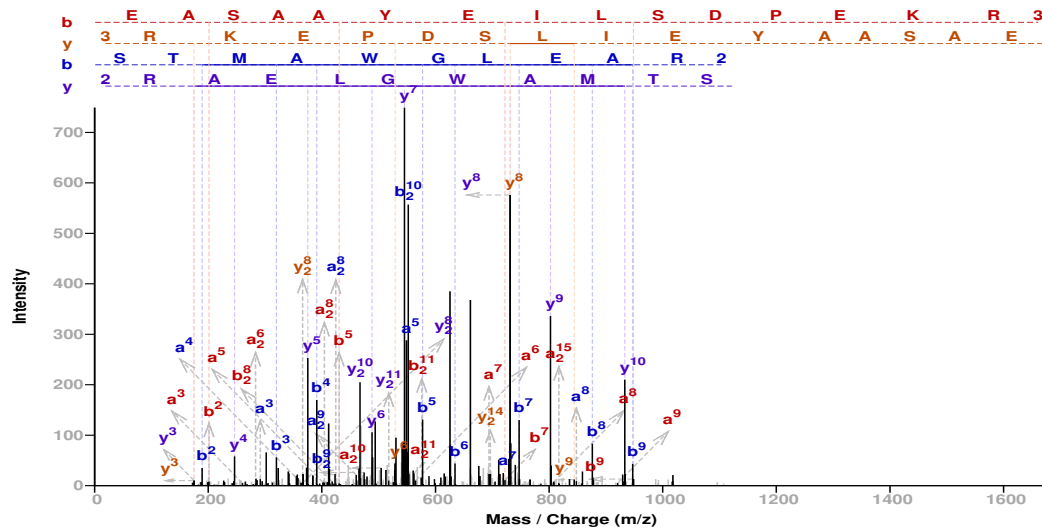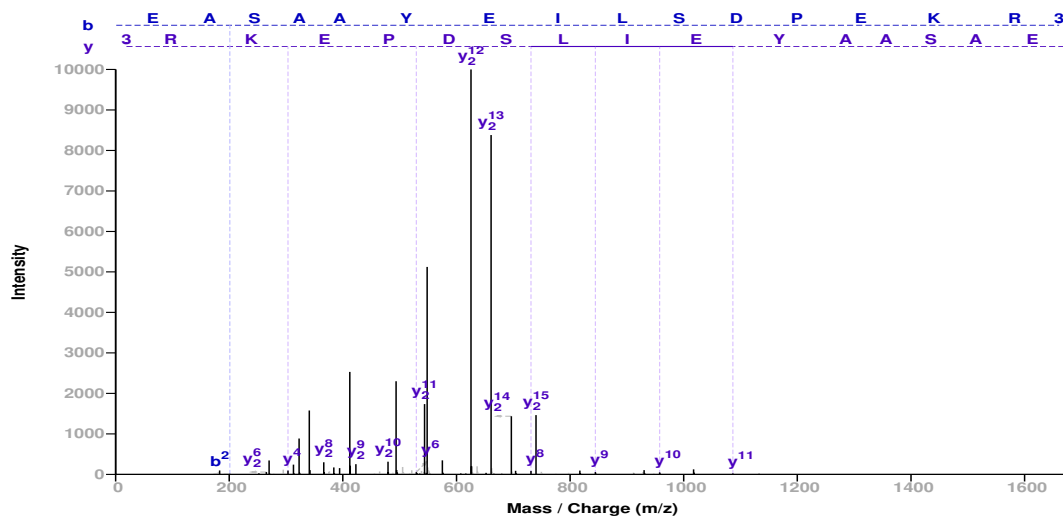



yeast2\_Scan\_Number\_3529 Precursor m/z: 389.709 cosine: 0.795  $\alpha$ : 0.403

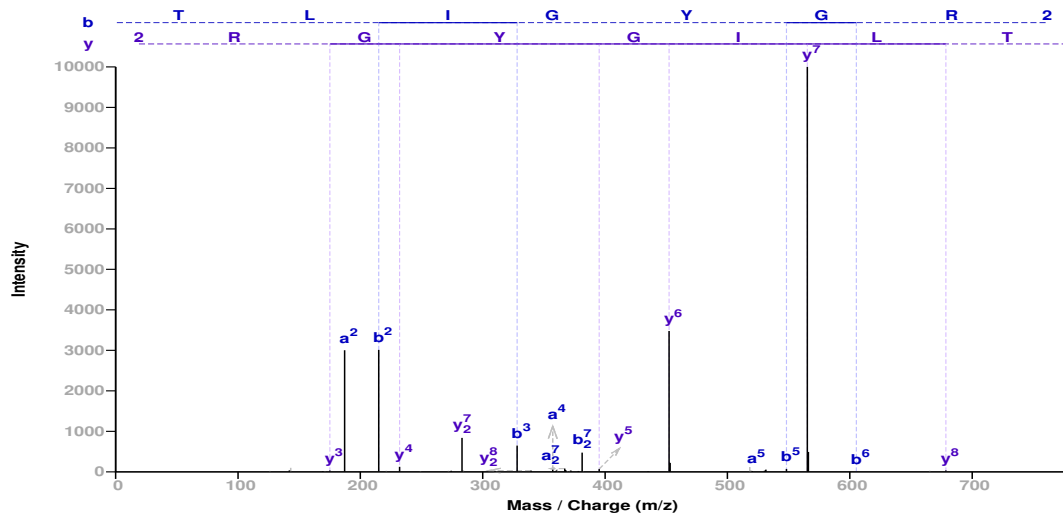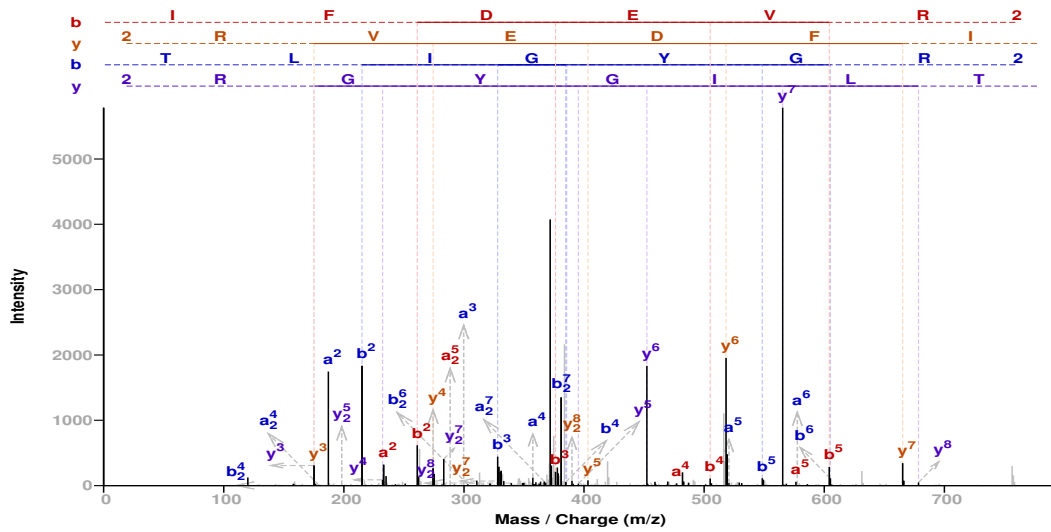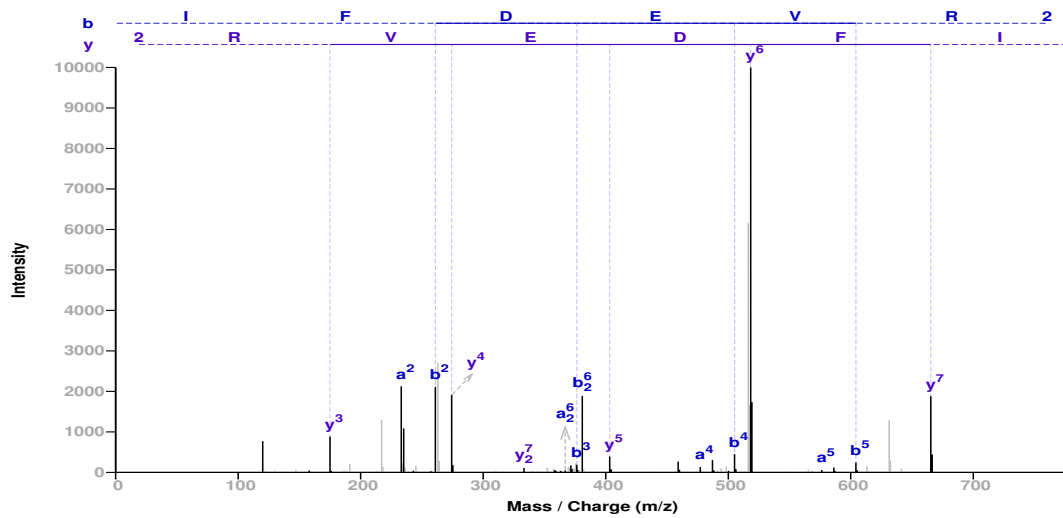





yeast2.Scan\_Number\_3458 Precursor m/z: 390.716 cosine: 0.780  $\alpha$ : 0.397

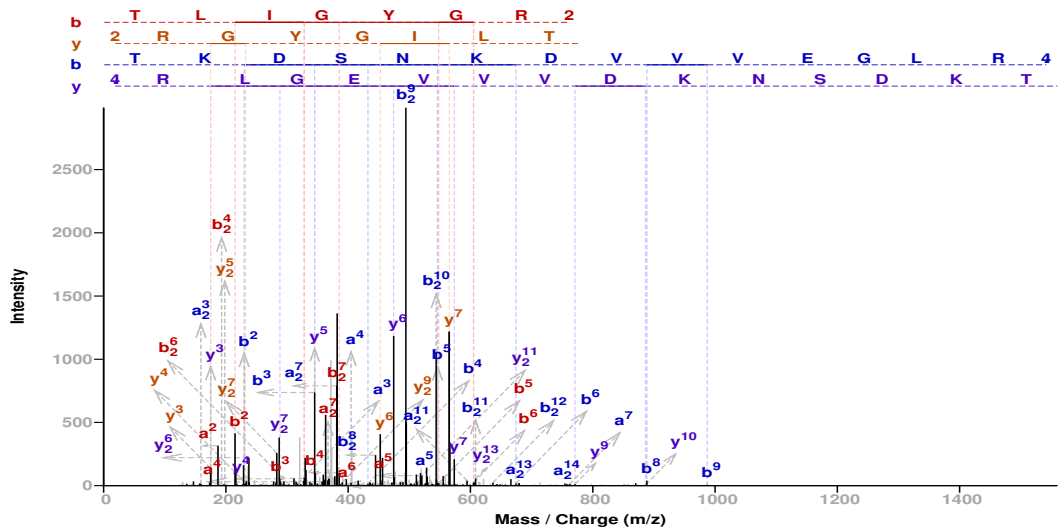

yeast2\_Scan\_Number\_2977 Precursor m/z: 423.241 cosine: 0.828  $\alpha$ : 0.389

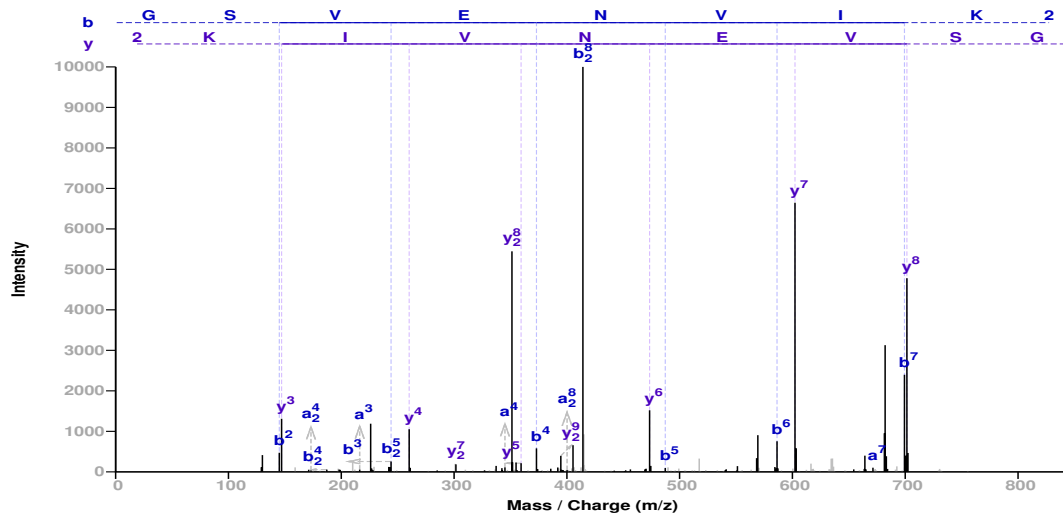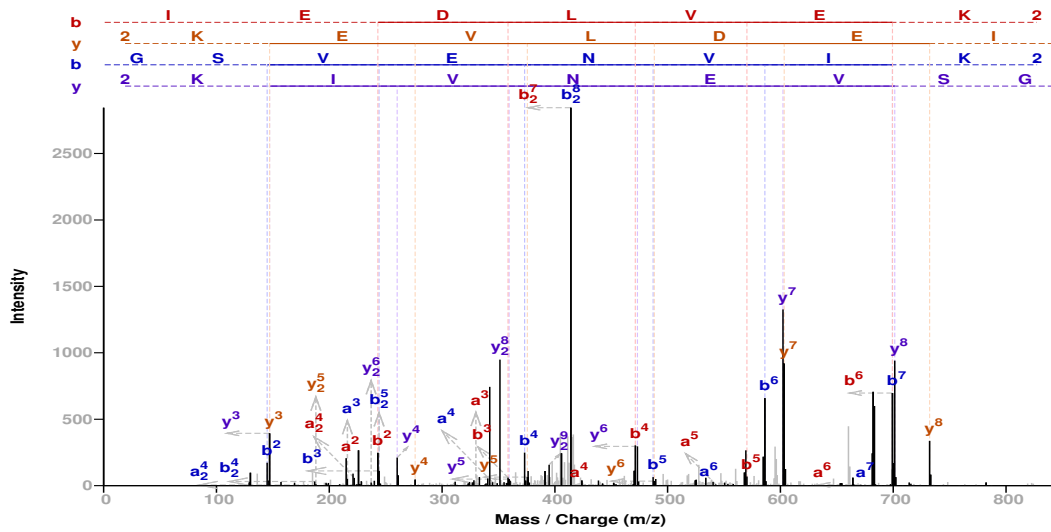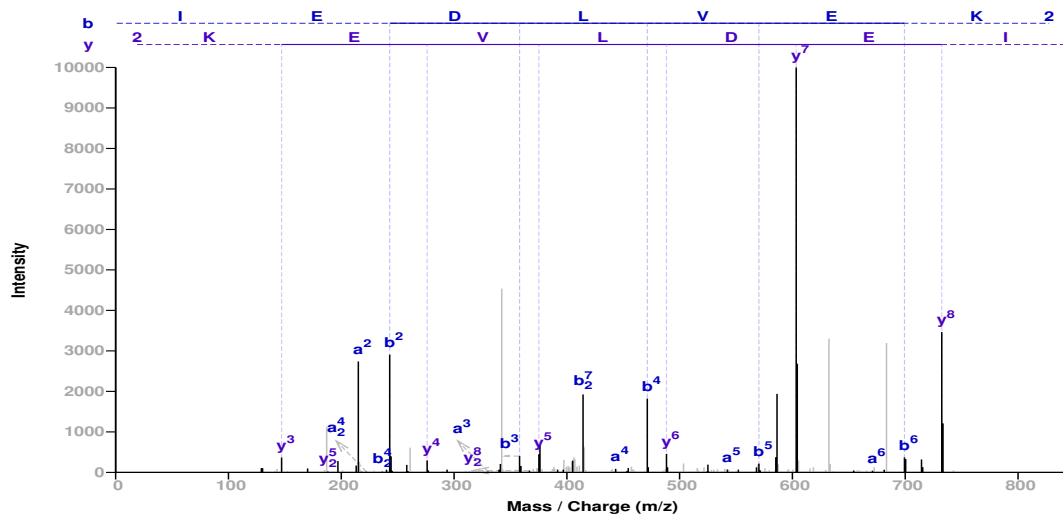

yeast2.Scan\_Number\_2797 Precursor m/z: 421.249 cosine: 0.738  $\alpha$ : 0.389

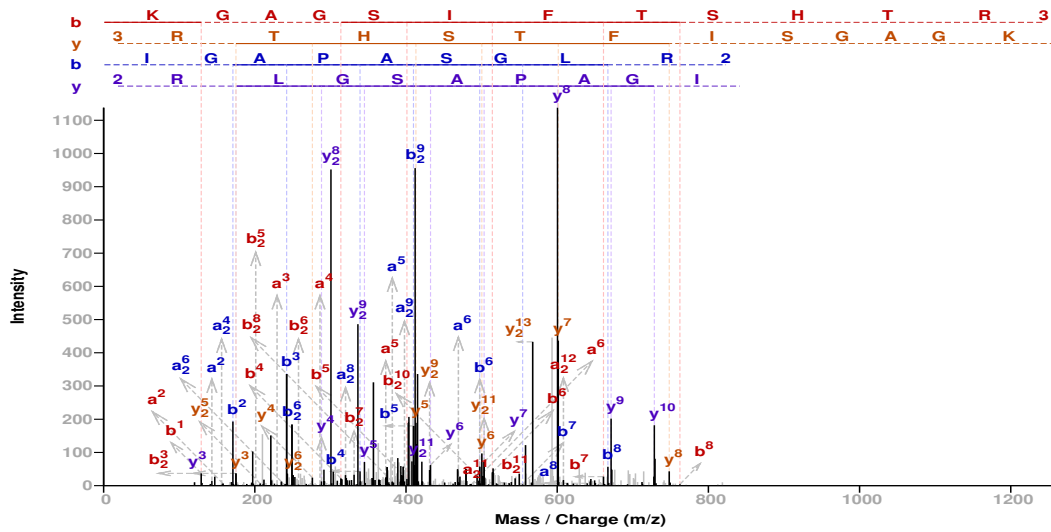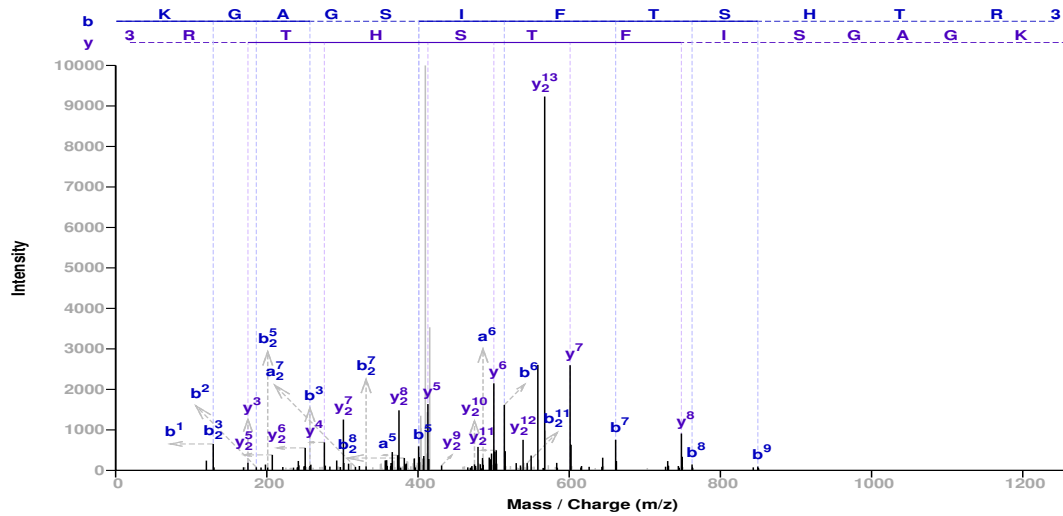

yeast2\_Scan\_Number\_4312 Precursor m/z: 444.762 cosine: 0.910  $\alpha$ : 0.387

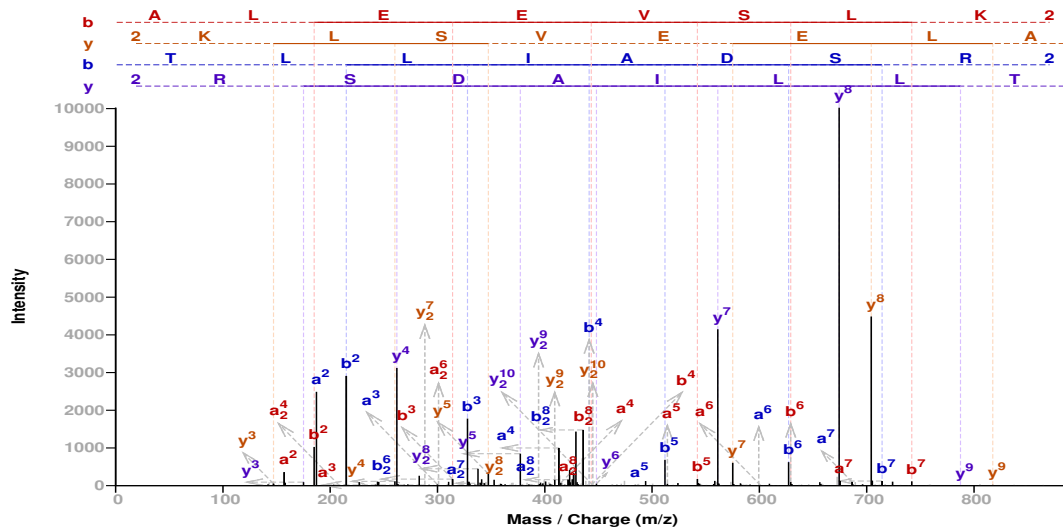



yeast2.Scan\_Number\_4411 Precursor m/z: 406.226 cosine: 0.812  $\alpha$ : 0.380

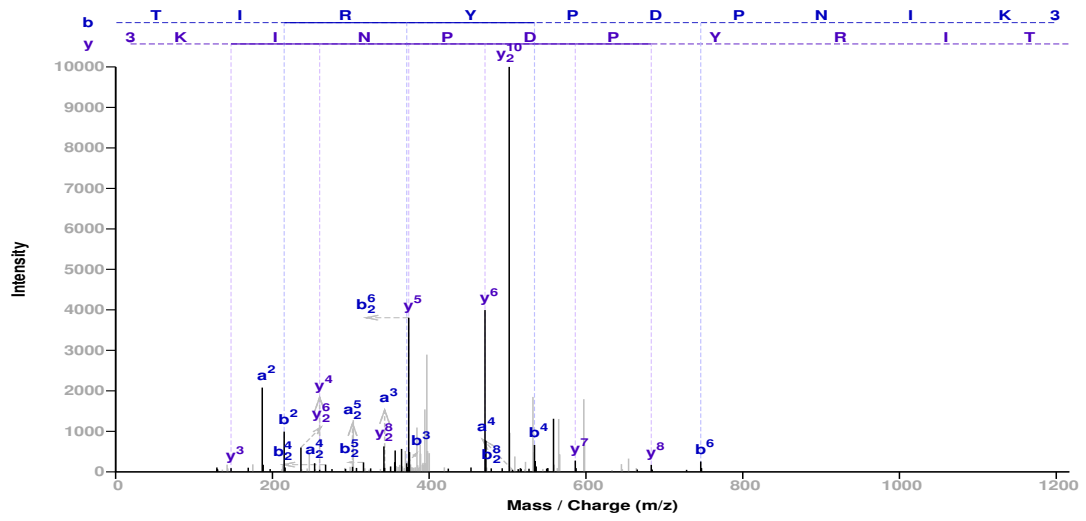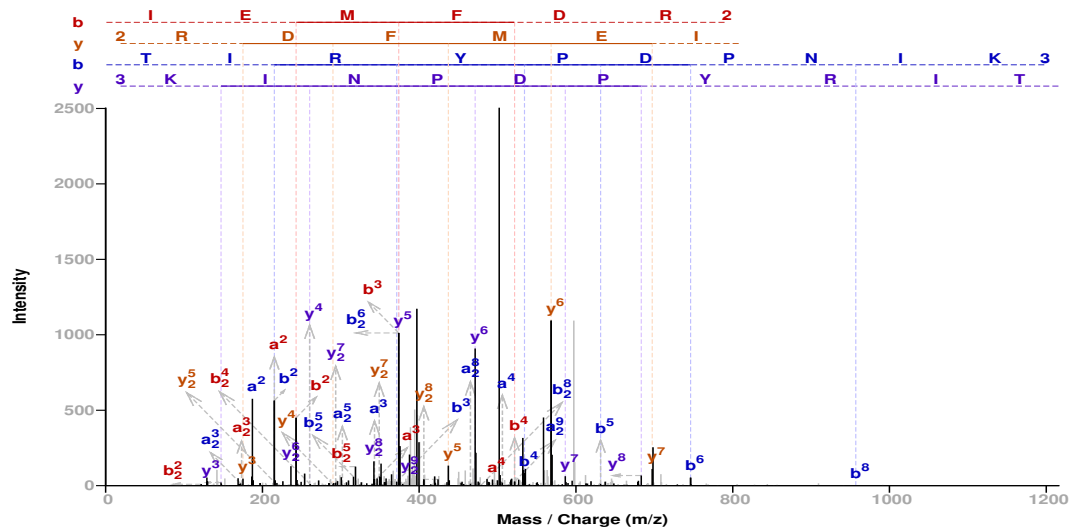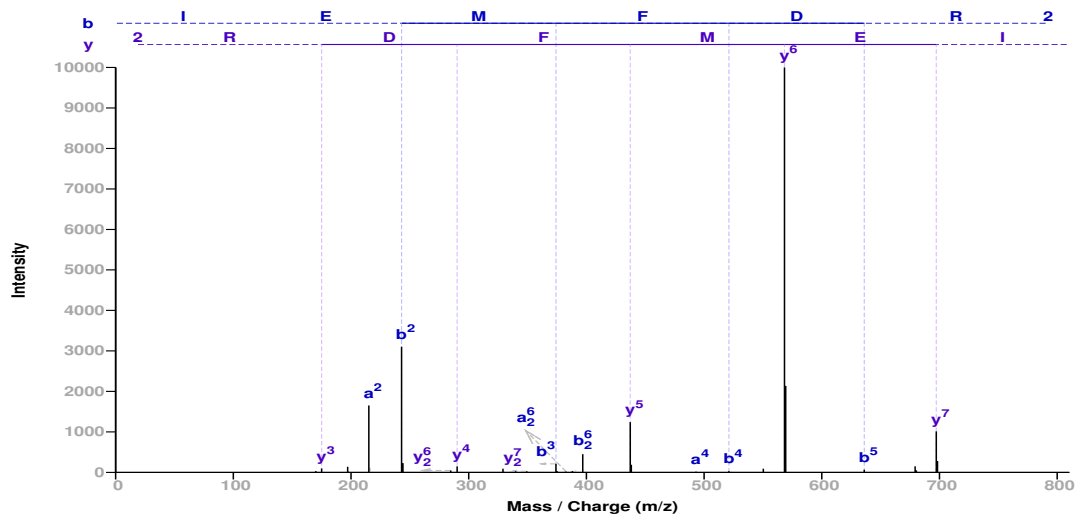

yeast2\_Scan\_Number\_4488 Precursor m/z: 636.350 cosine: 0.792  $\alpha$ : 0.380

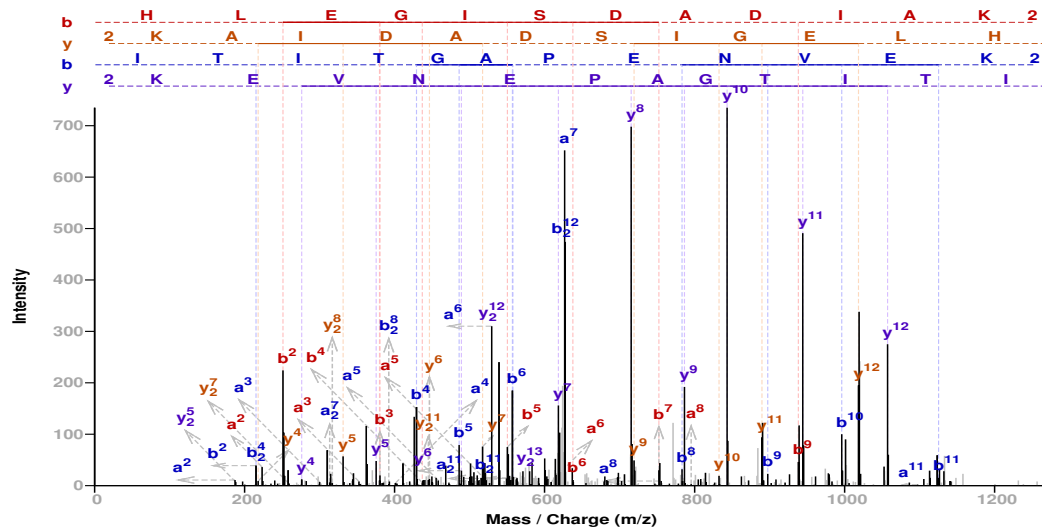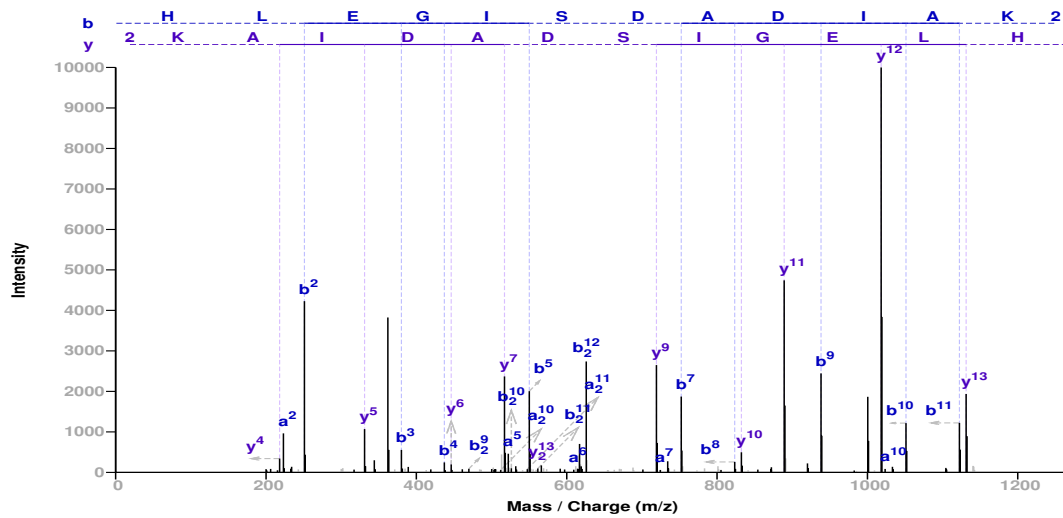

yeast2.Scan\_Number\_2941 Precursor m/z: 432.751 cosine: 0.801  $\alpha$ : 0.379

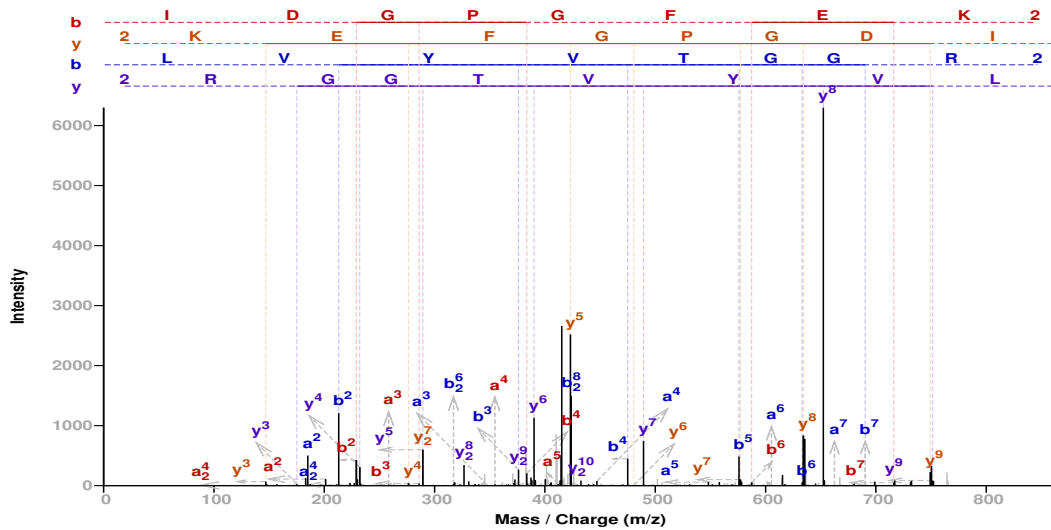



yeast2.Scan\_Number\_2347 Precursor m/z: 406.212 cosine: 0.758  $\alpha$ : 0.378

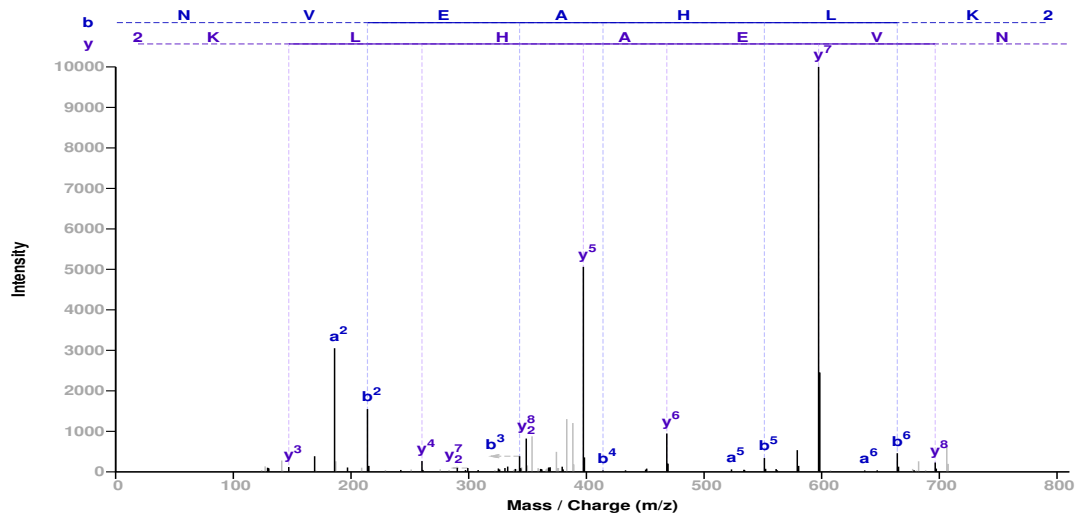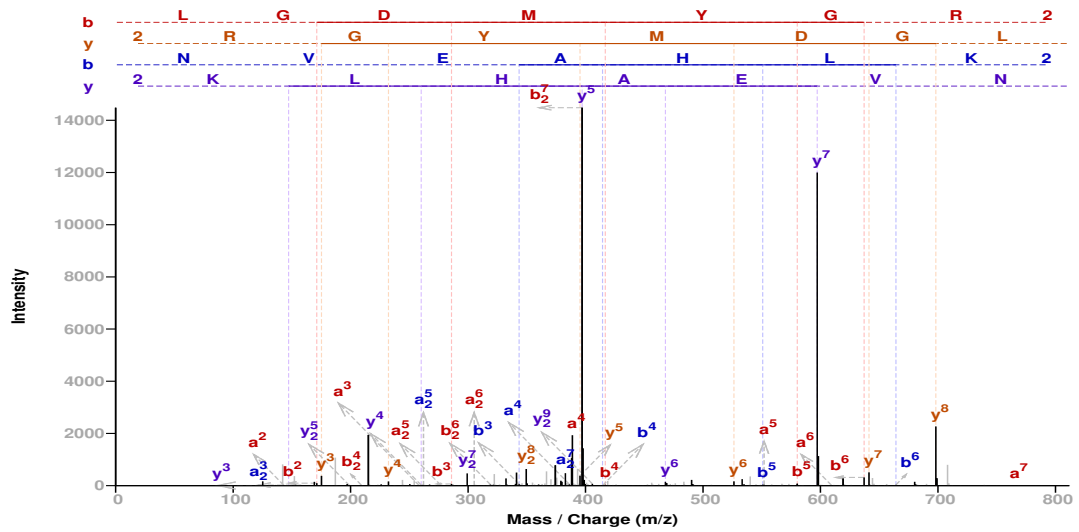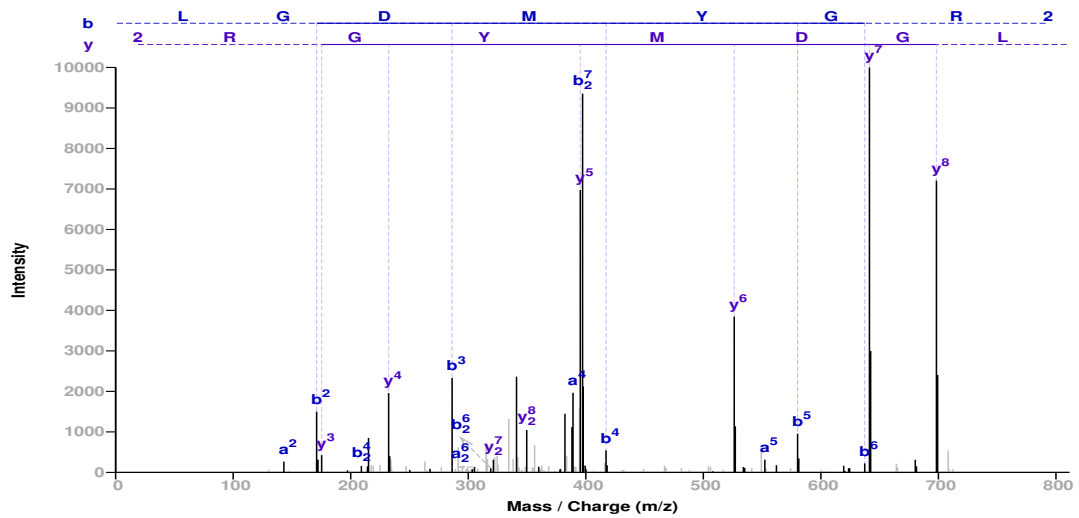

yeast2\_Scan\_Number\_2695 Precursor m/z: 568.292 cosine: 0.795  $\alpha$ : 0.378



yeast2\_Scan\_Number\_8082 Precursor m/z: 708.380 cosine: 0.771  $\alpha$ : 0.378

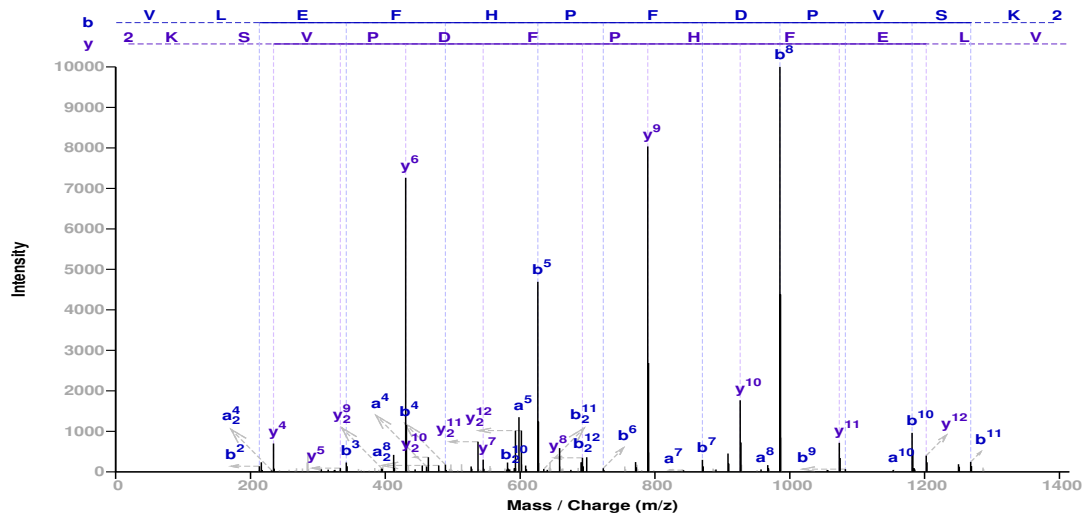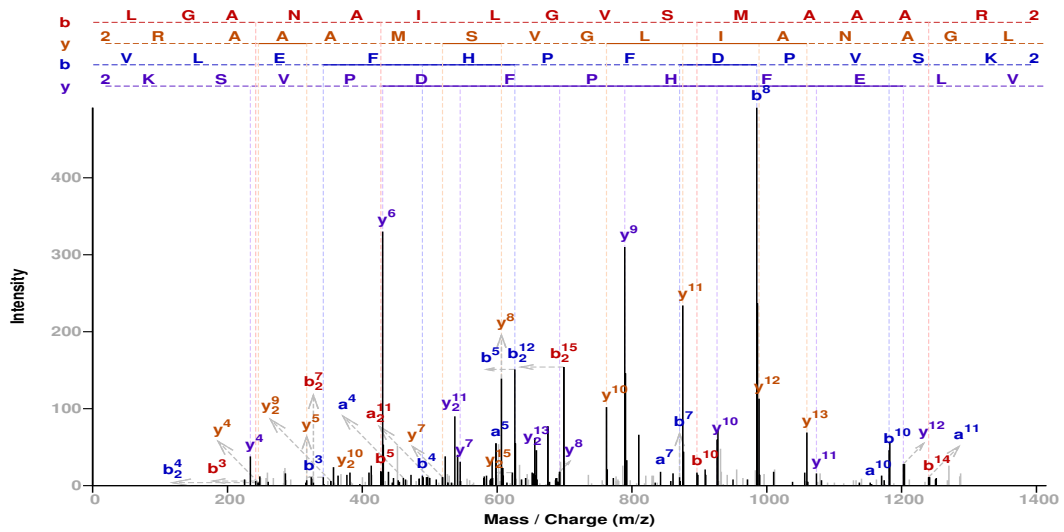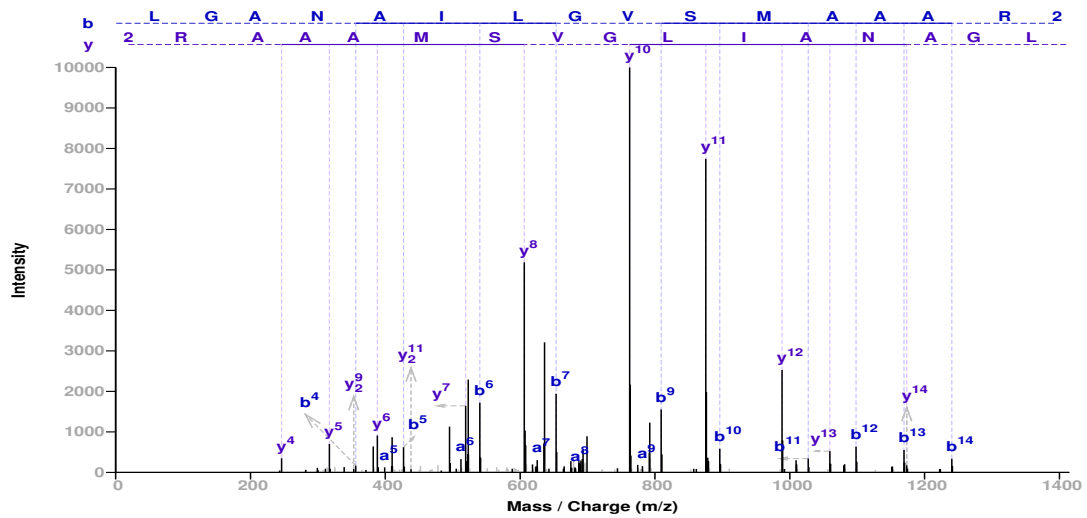

yeast2.Scan\_Number.1369 Precursor m/z: 495.899 cosine: 0.741  $\alpha$ : 0.375

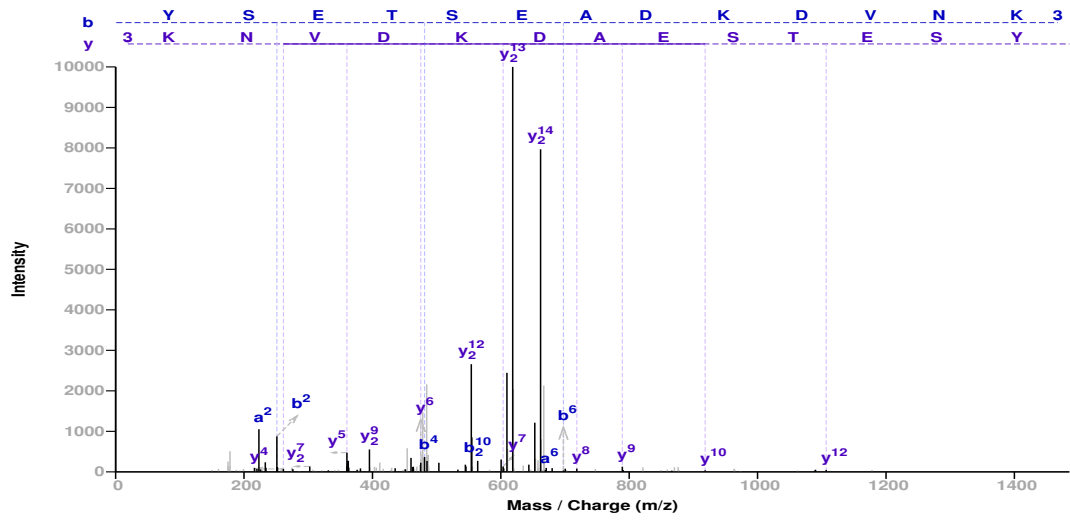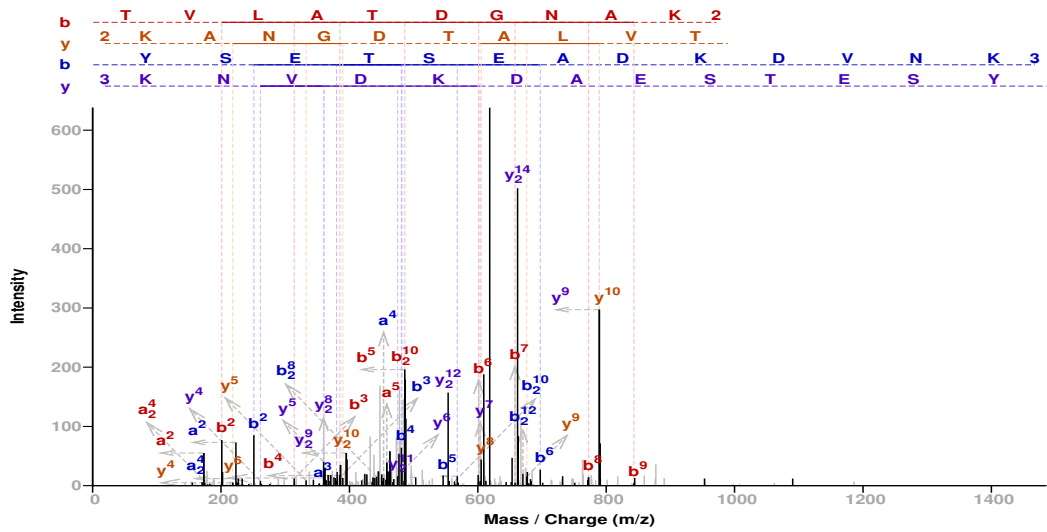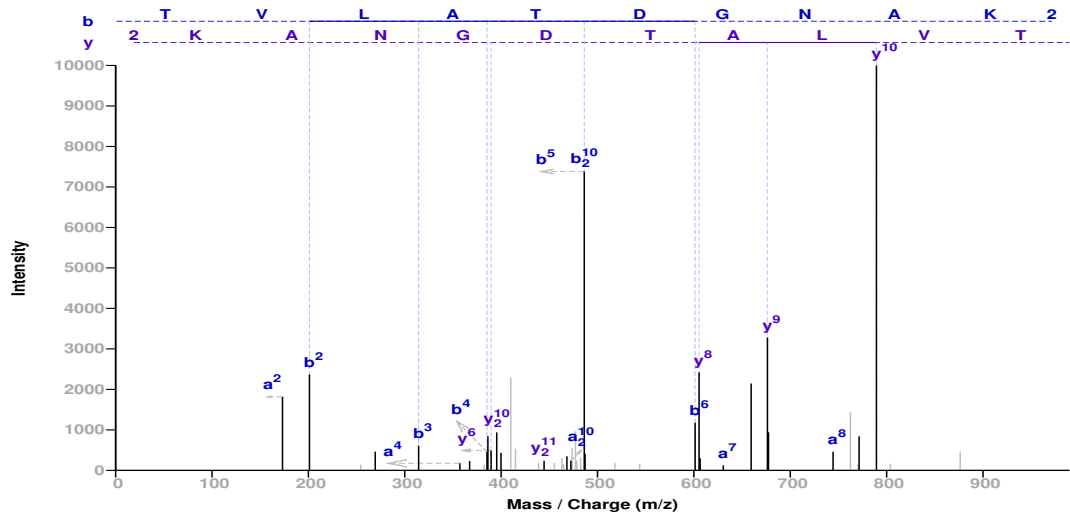

yeast2\_Scan\_Number\_9414 Precursor m/z: 639.836 cosine: 0.765  $\alpha$ : 0.373

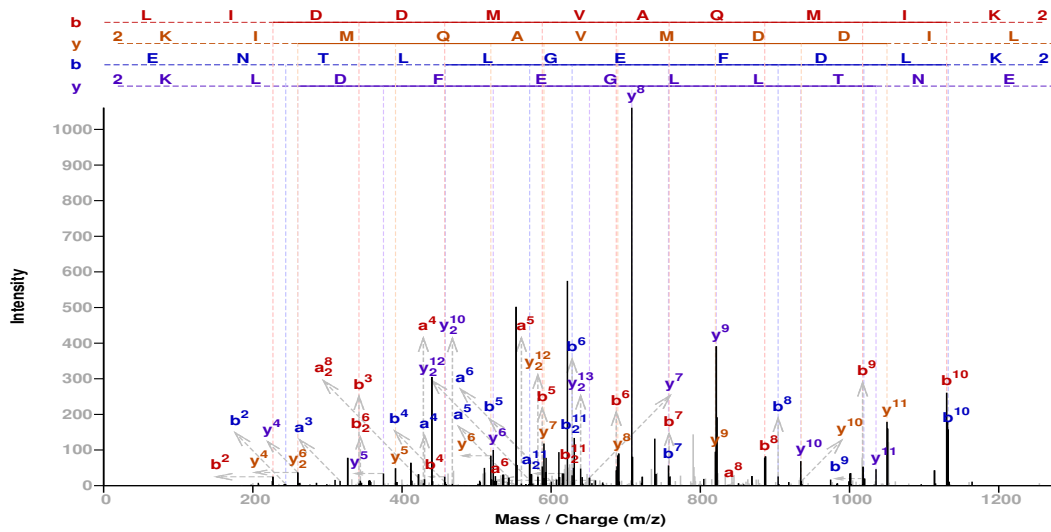

yeast2\_Scan\_Number\_6902 Precursor m/z: 909.911 cosine: 0.786  $\alpha$ : 0.369

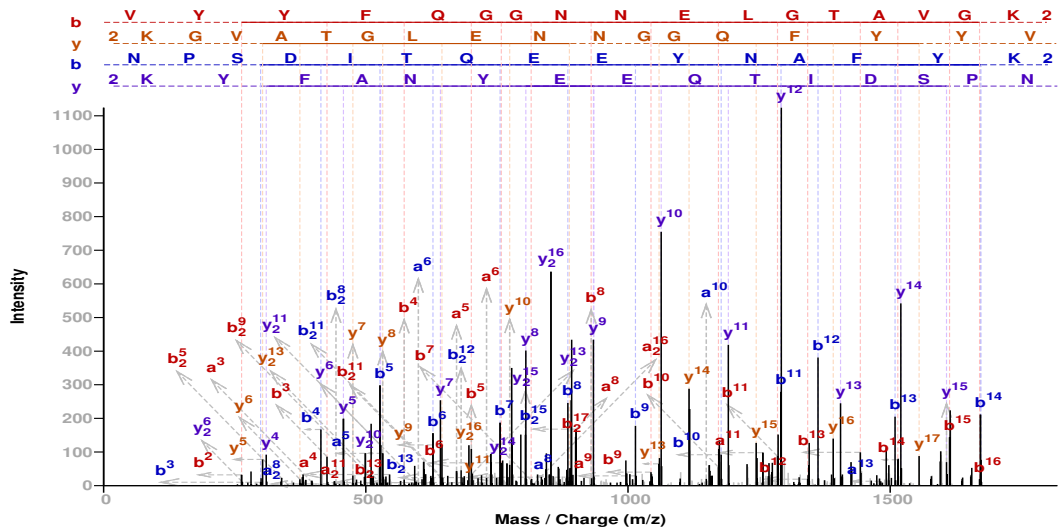

yeast2.Scan\_Number.1887 Precursor m/z: 415.199 cosine: 0.813  $\alpha$ : 0.366

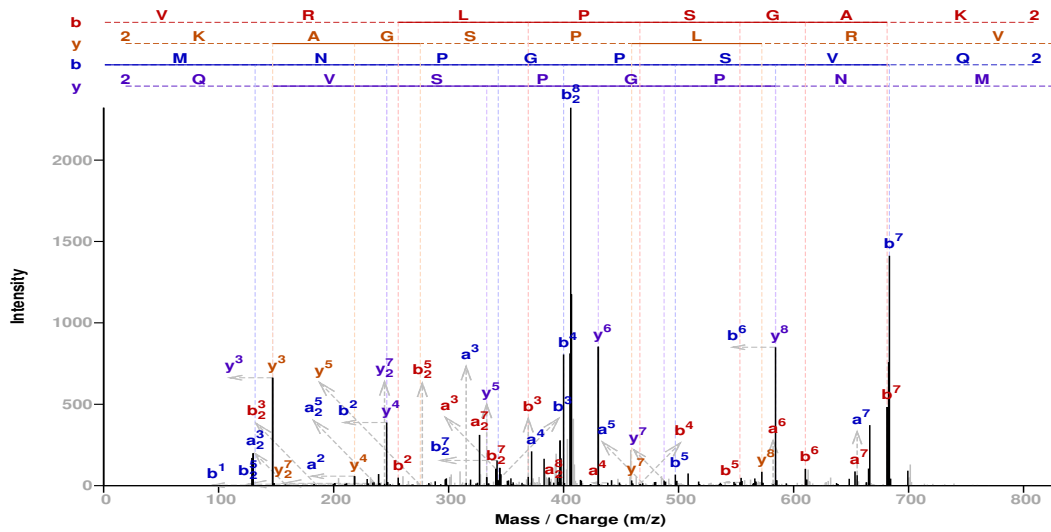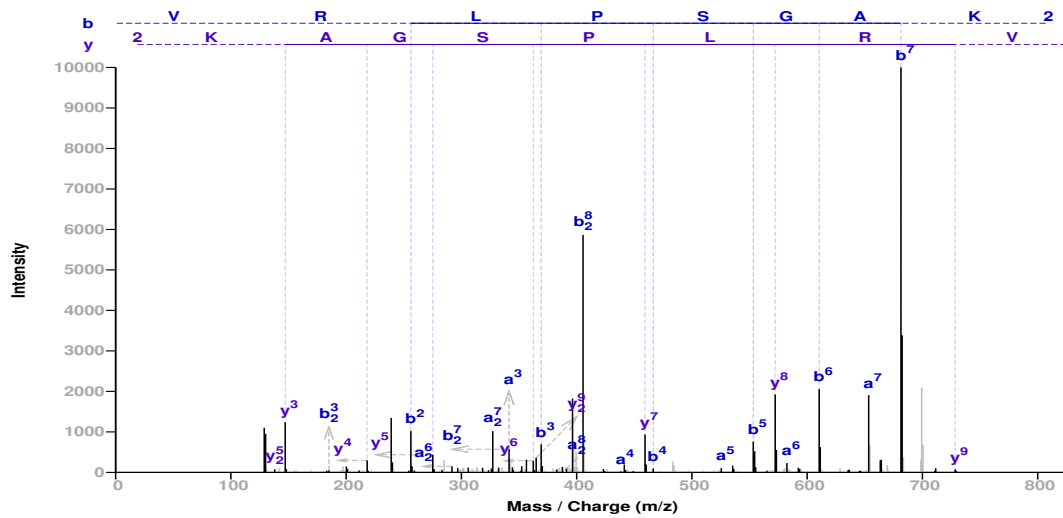

yeast2\_Scan\_Number\_4959 Precursor m/z: 769.886 cosine: 0.790  $\alpha$ : 0.365

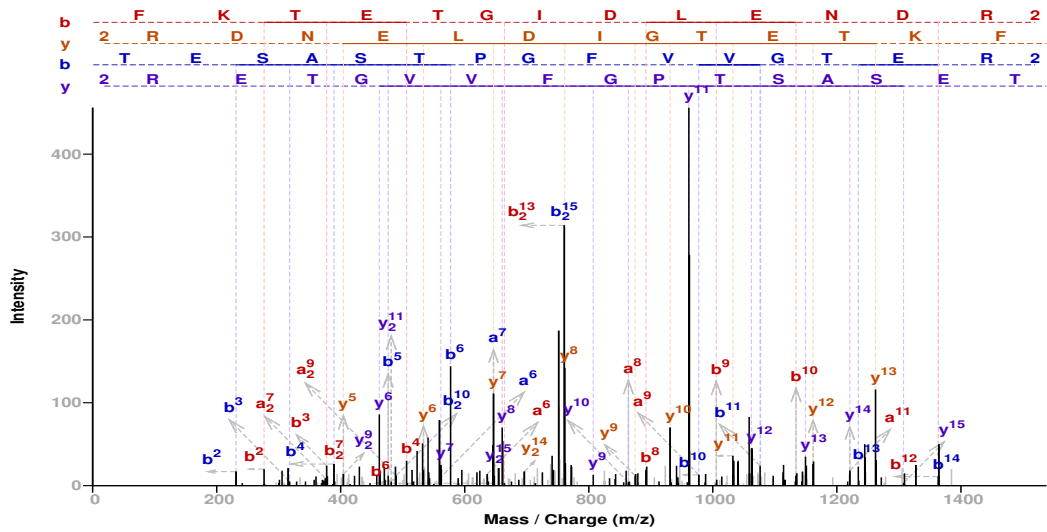



yeast2\_Scan\_Number\_8424 Precursor m/z: 642.792 cosine: 0.788  $\alpha$ : 0.363

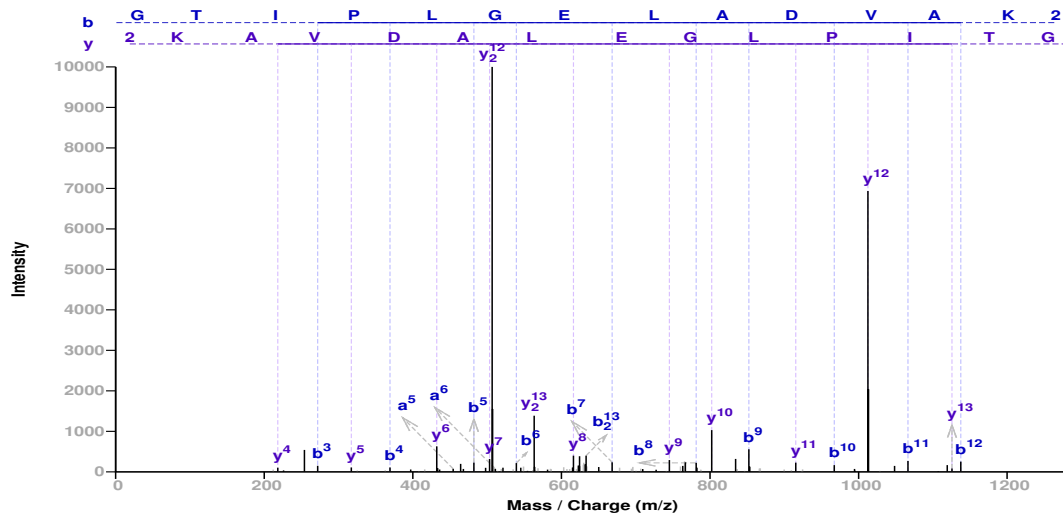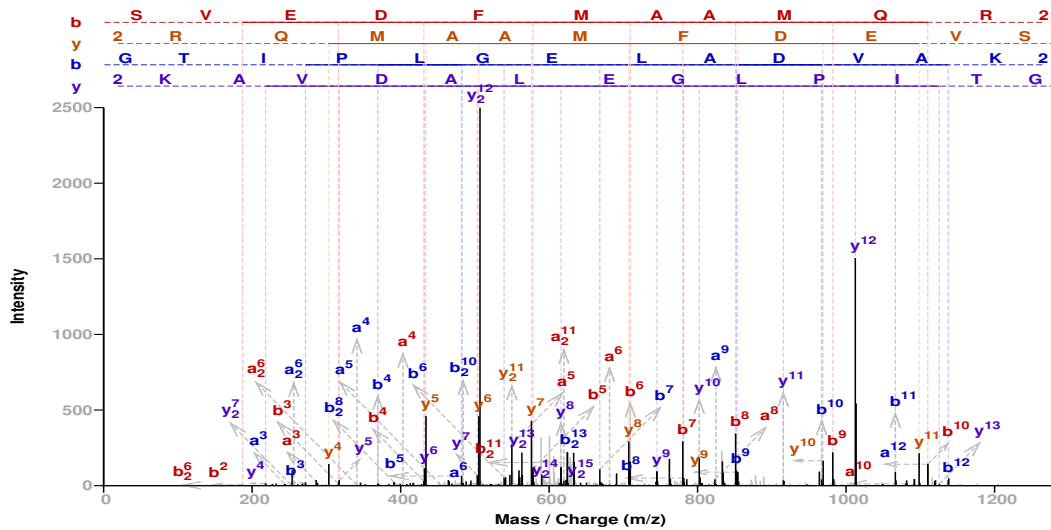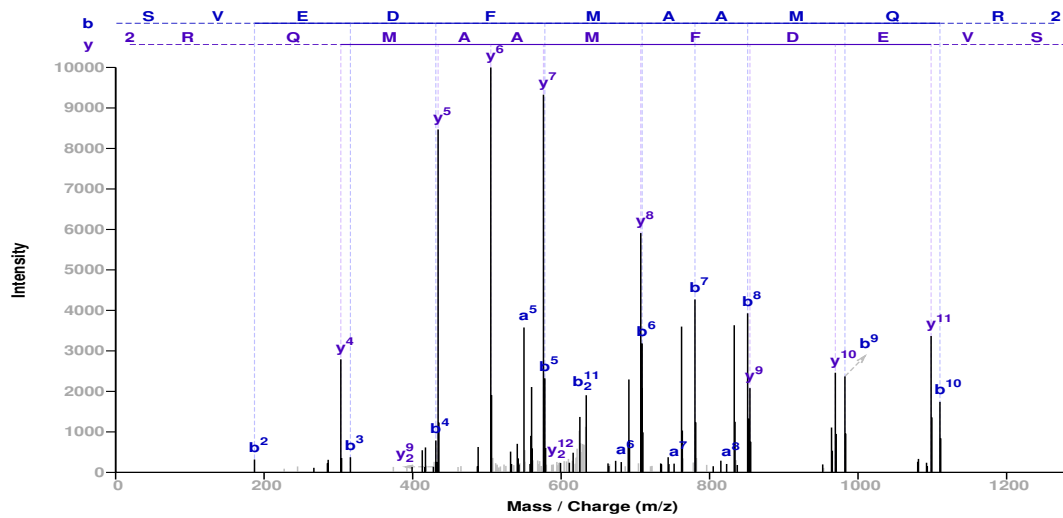

yeast2\_Scan\_Number\_1698 Precursor m/z: 480.261 cosine: 0.819  $\alpha$ : 0.363

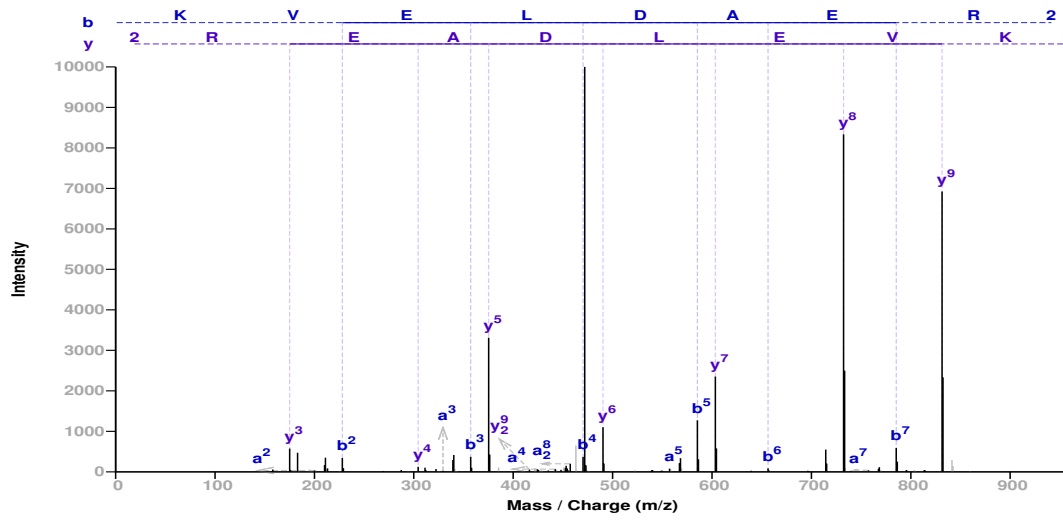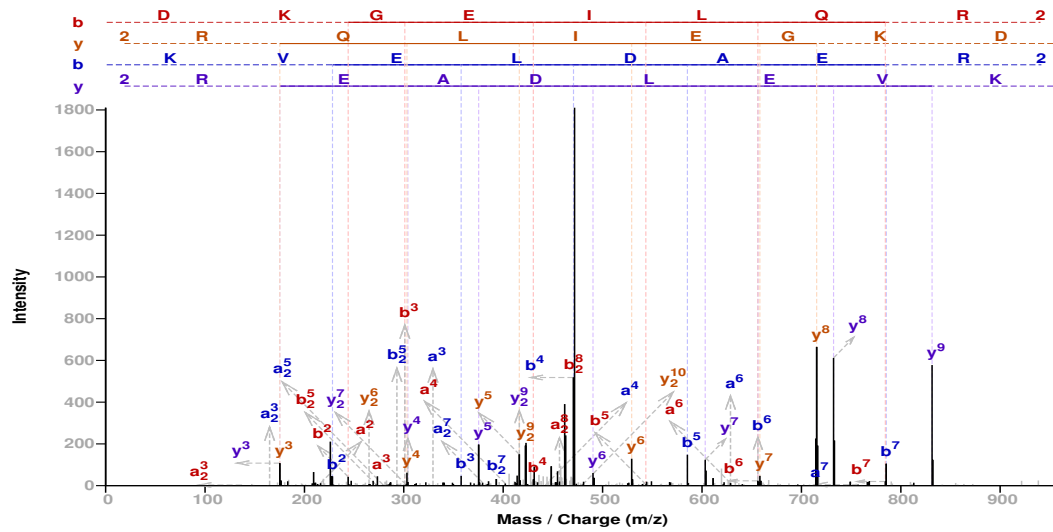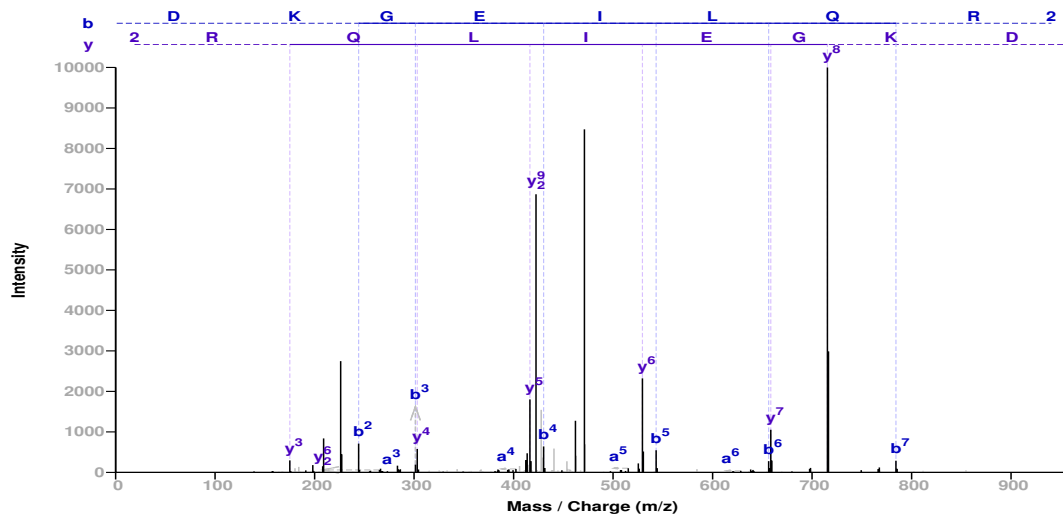

yeast2\_Scan\_Number\_6373 Precursor m/z: 537.310 cosine: 0.771  $\alpha$ : 0.362

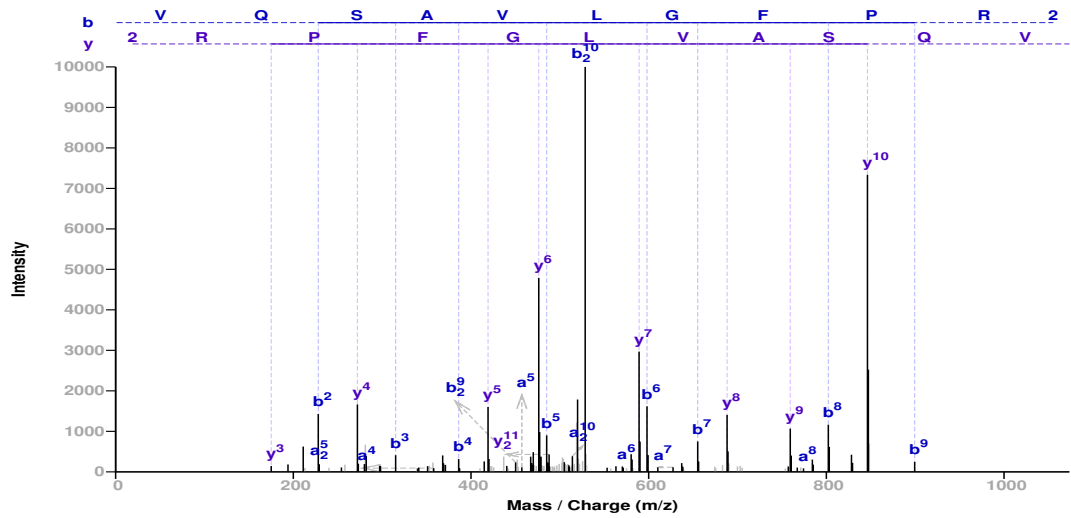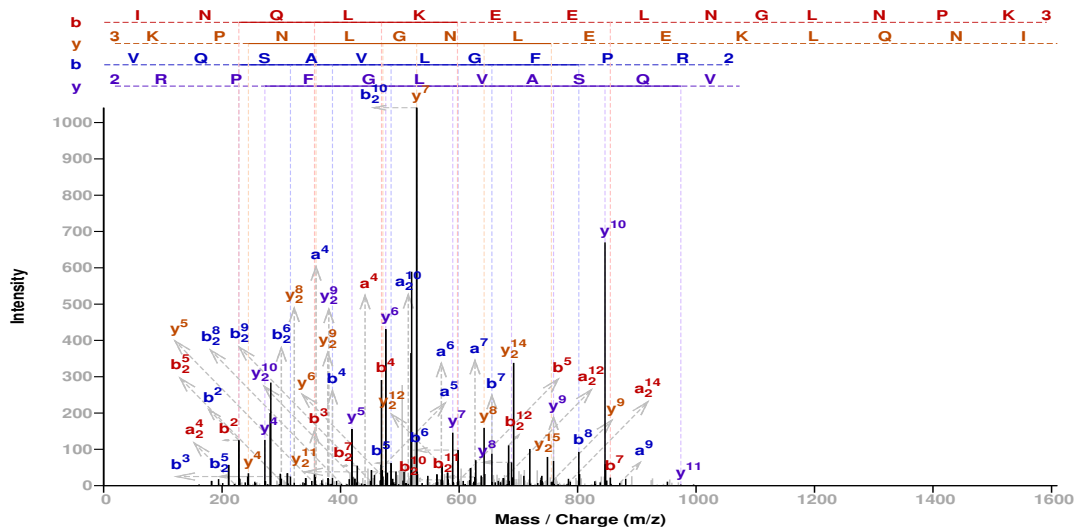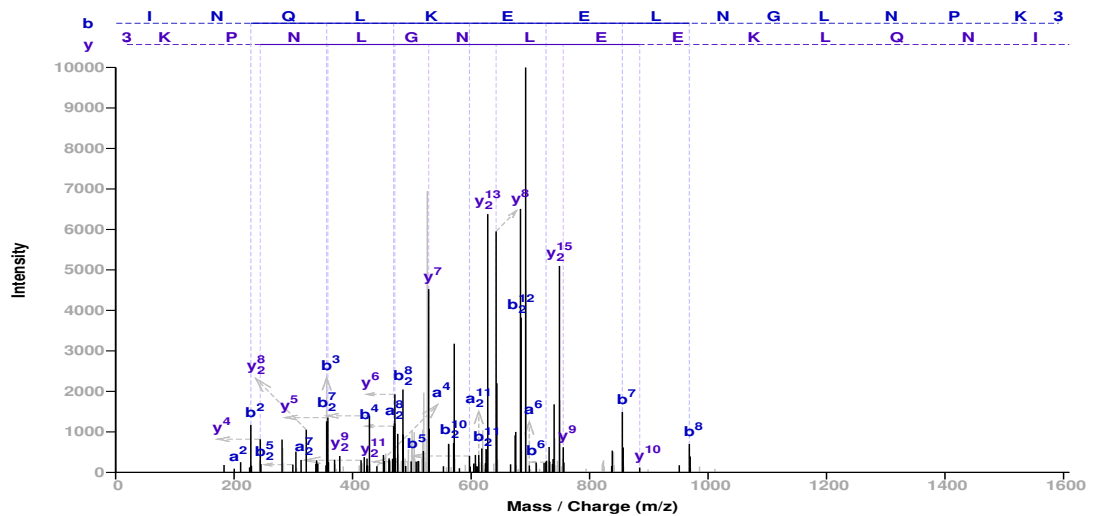

yeast2.Scan\_Number\_6605 Precursor m/z: 483.606 cosine: 0.744  $\alpha$ : 0.361

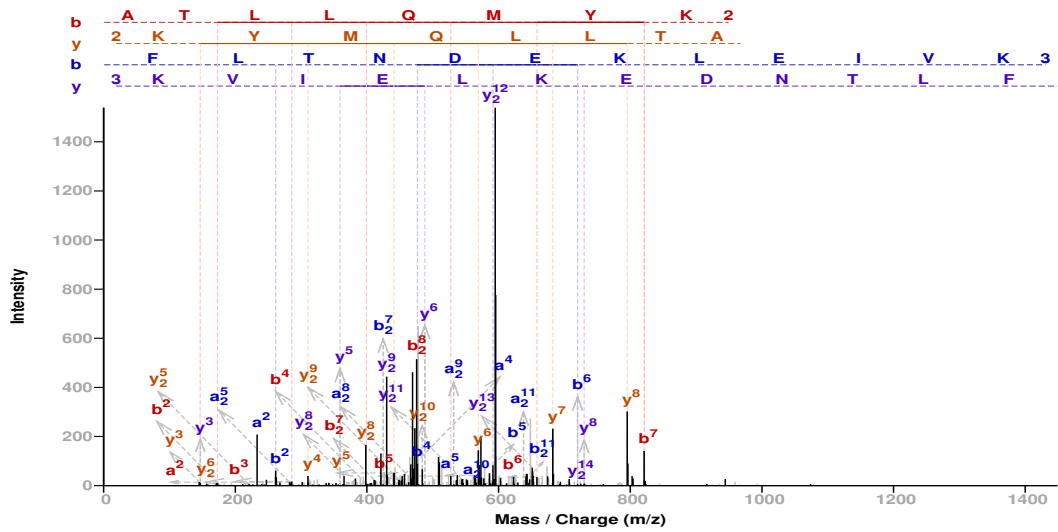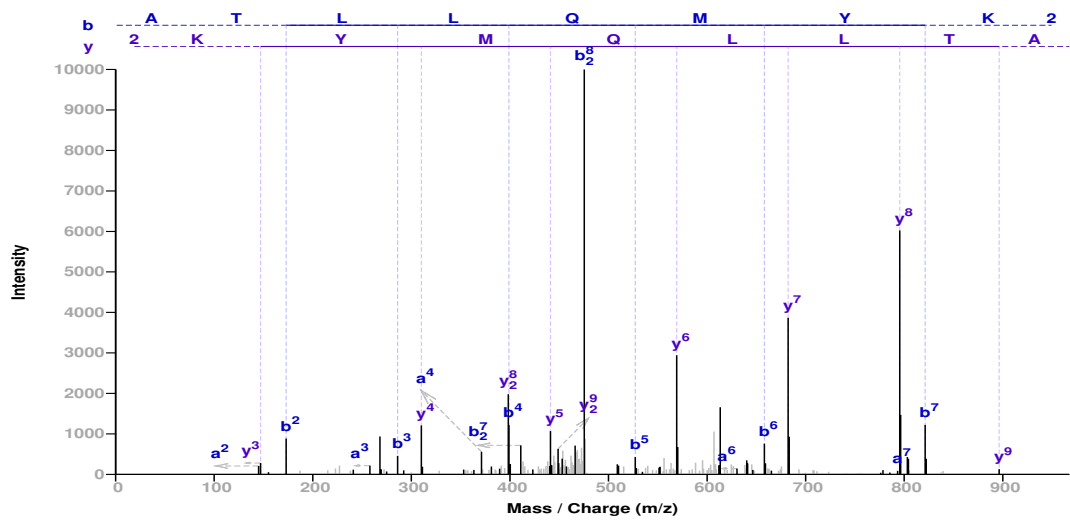

yeast2\_Scan\_Number\_5784 Precursor m/z: 582.307 cosine: 0.801  $\alpha$ : 0.360

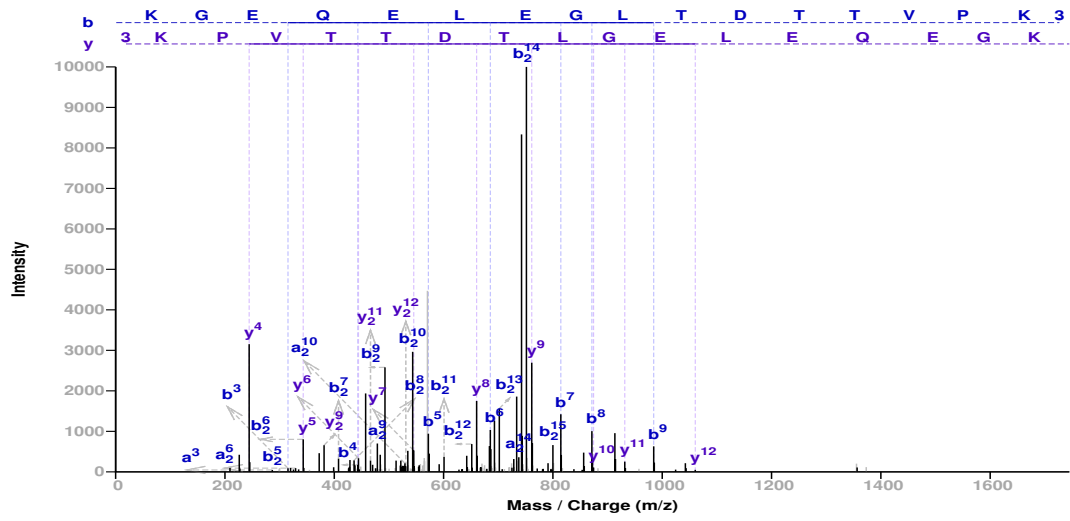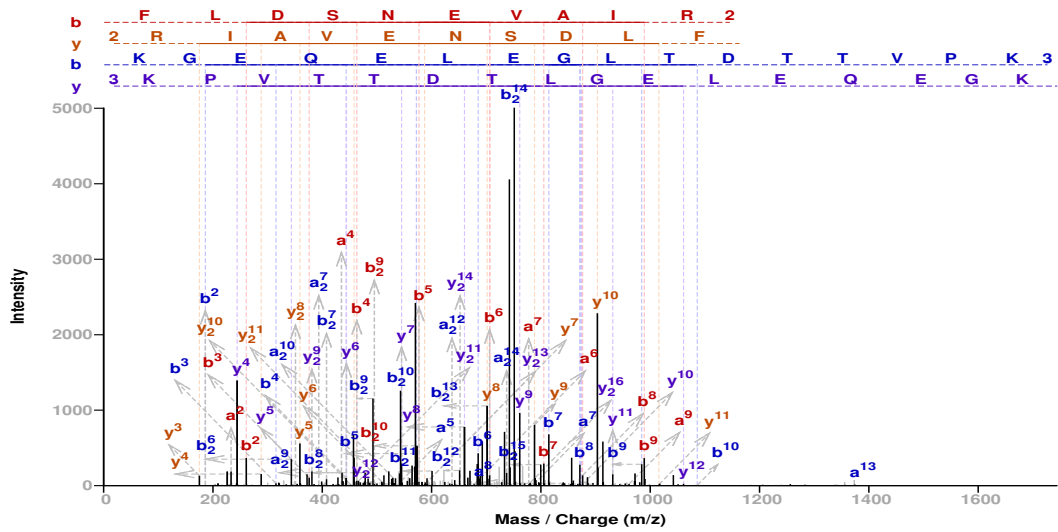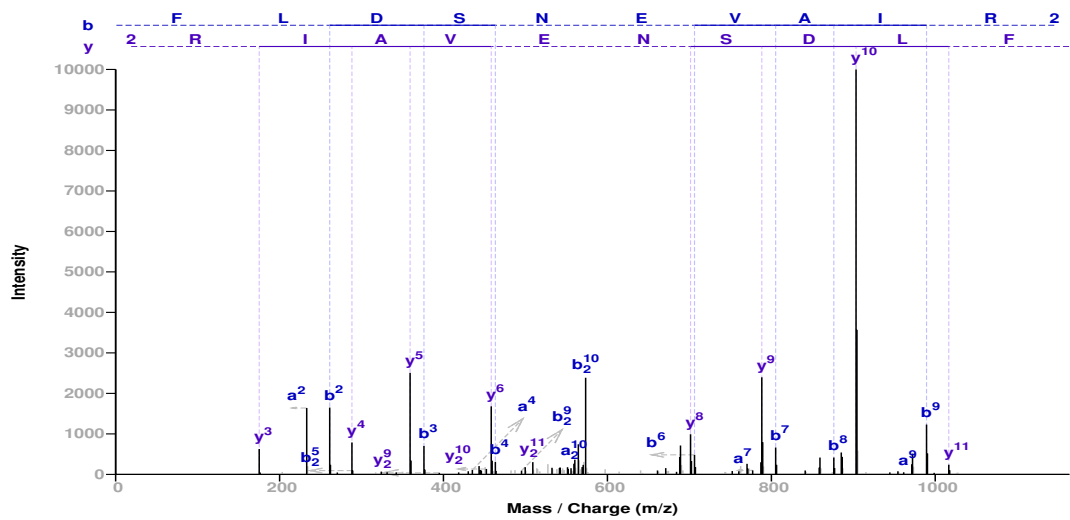

yeast2.Scan\_Number\_3953 Precursor m/z: 510.792 cosine: 0.734  $\alpha$ : 0.354

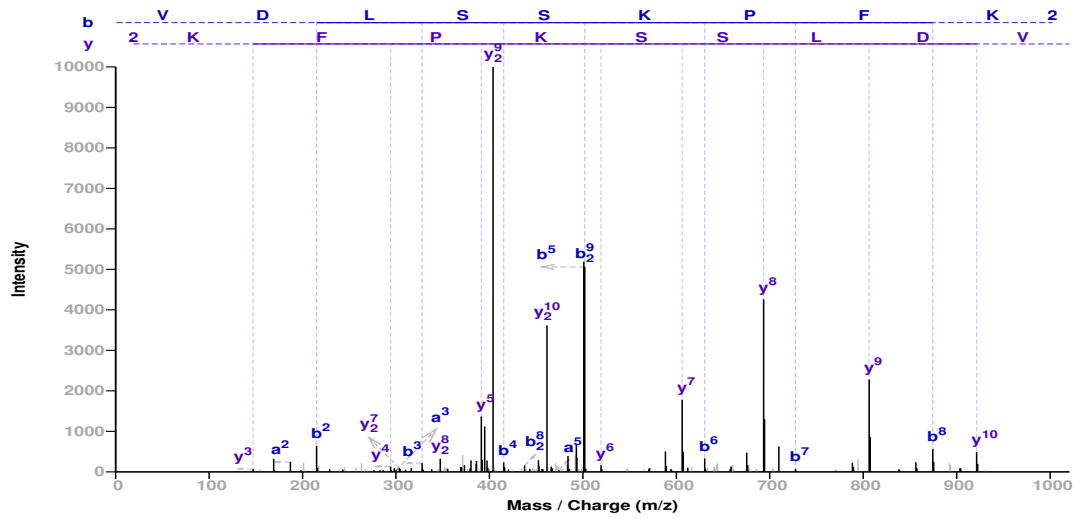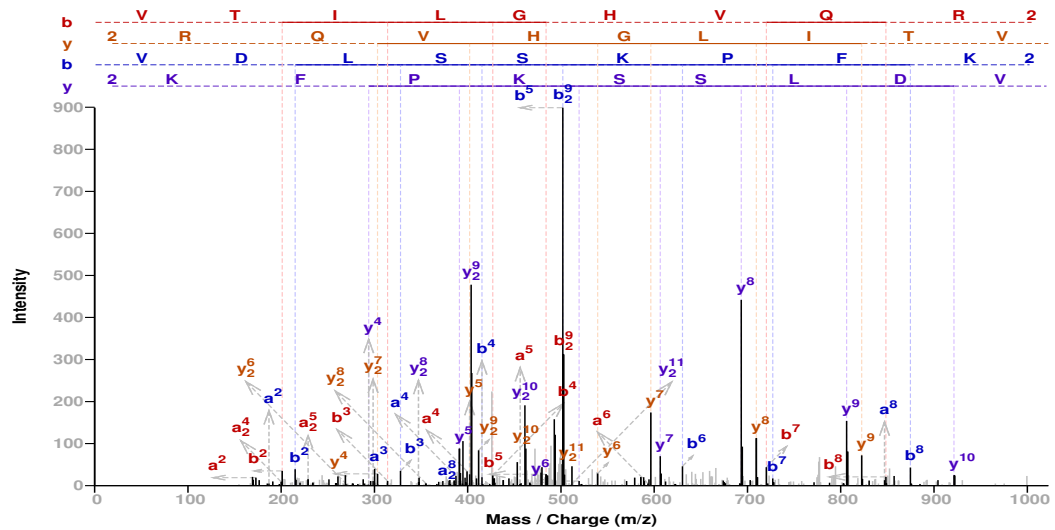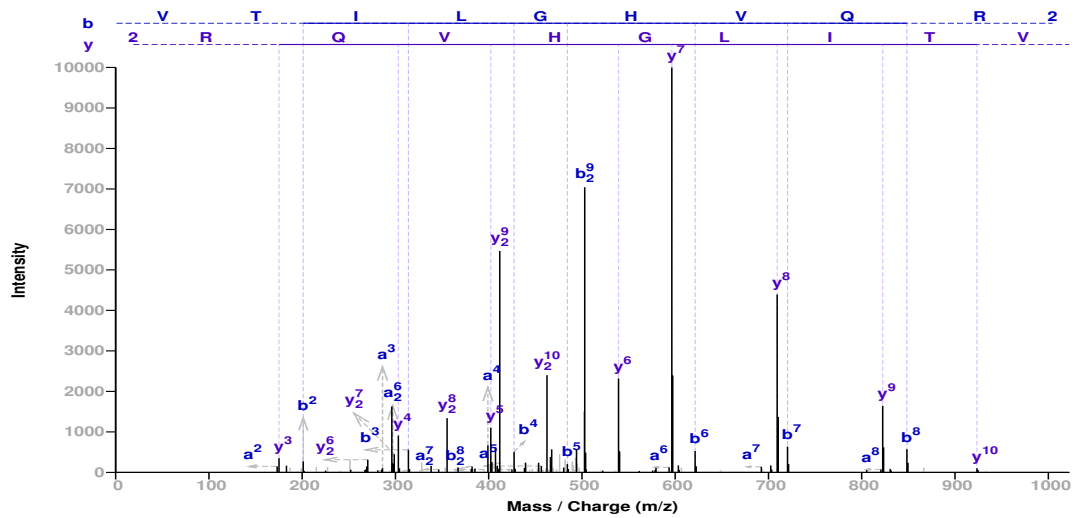

yeast2\_Scan\_Number\_3719 Precursor m/z: 424.749 cosine: 0.956  $\alpha$ : 0.352

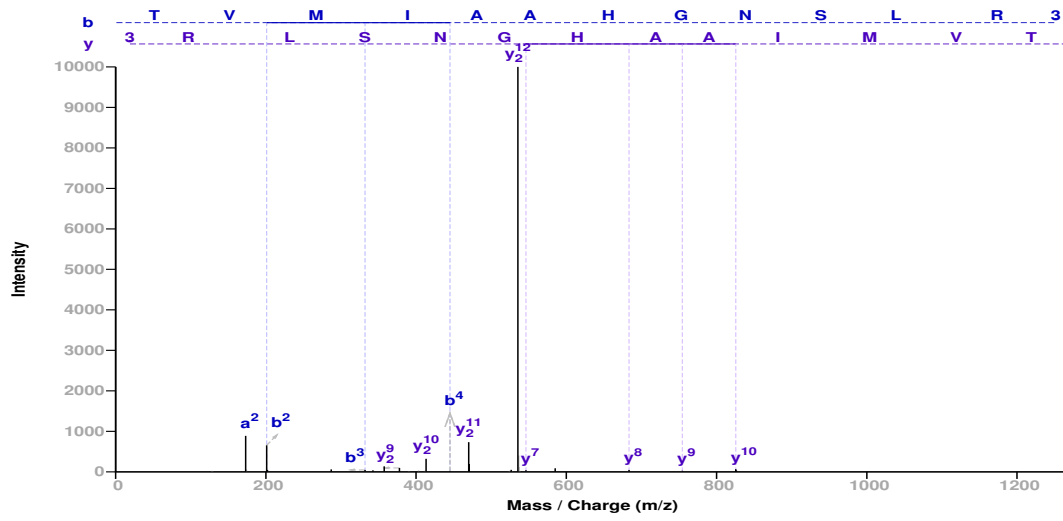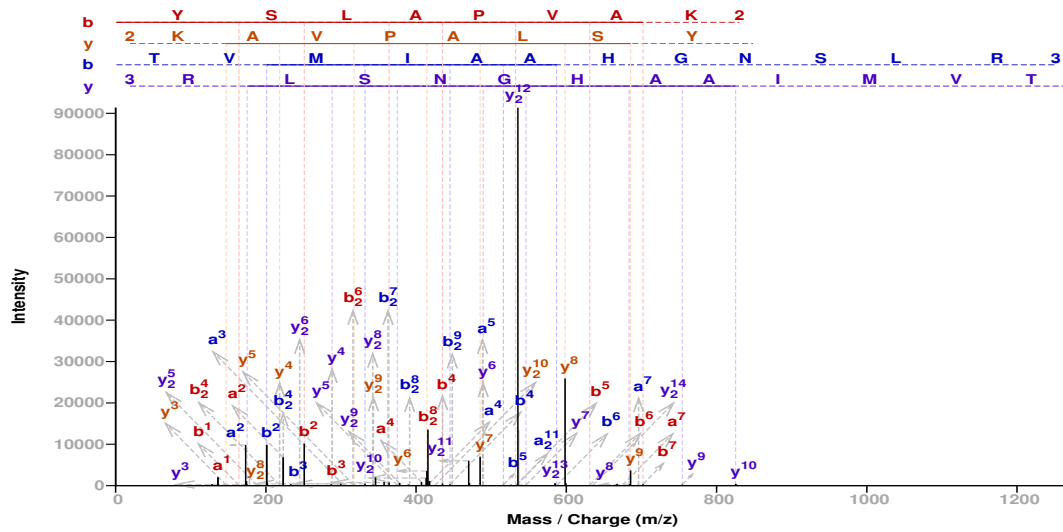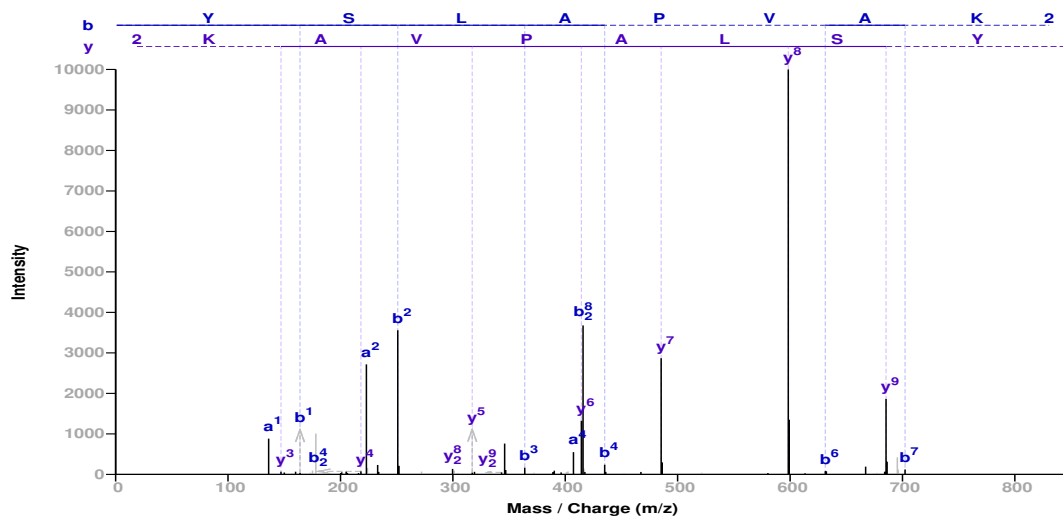







yeast2.Scan\_Number\_2675 Precursor m/z: 465.214 cosine: 0.755  $\alpha$ : 0.350

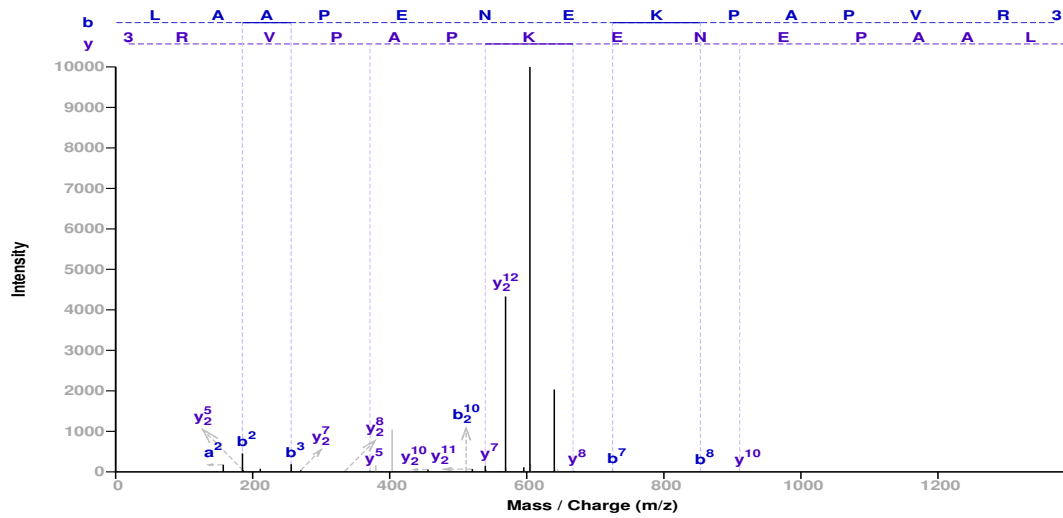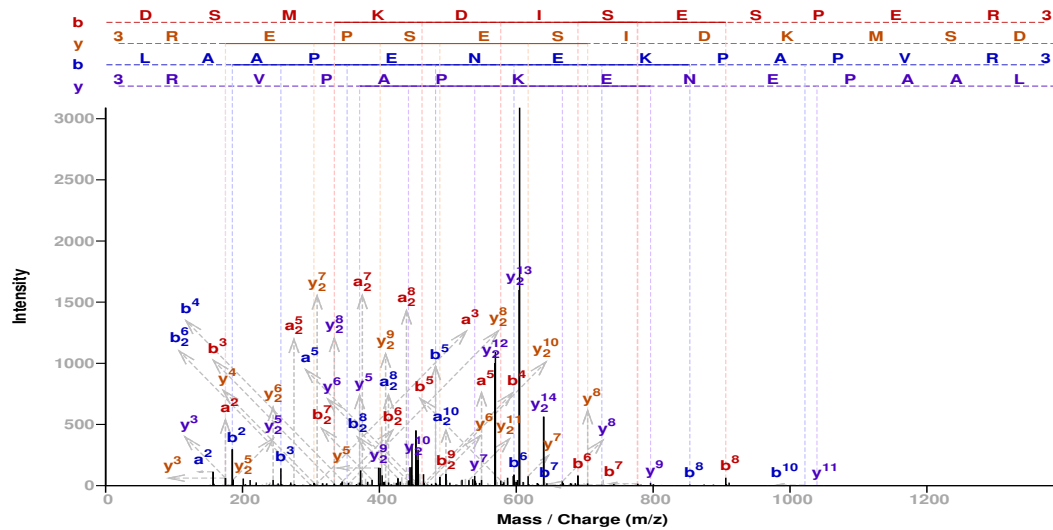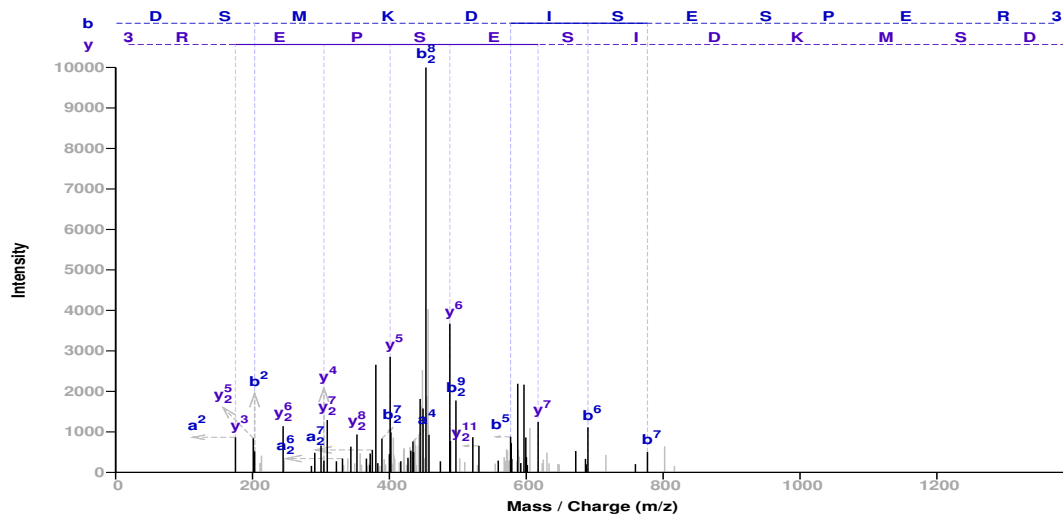

yeast2.Scan\_Number\_2607 Precursor m/z: 440.724 cosine: 0.792  $\alpha$ : 0.345

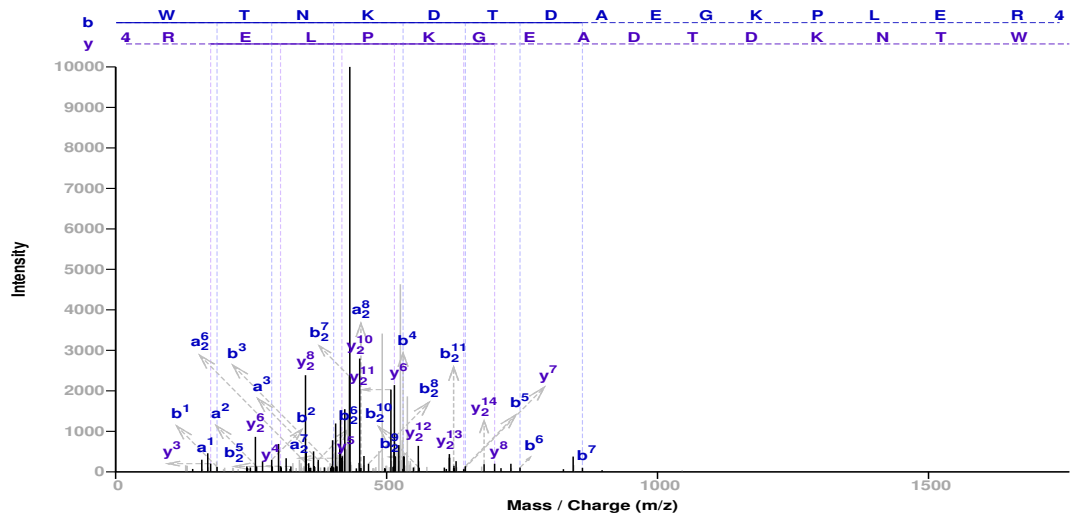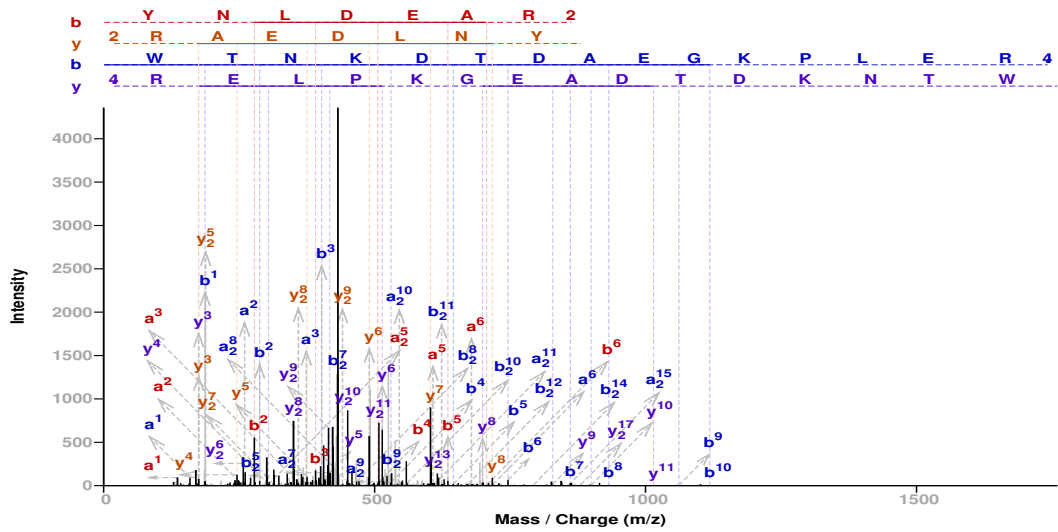

yeast2\_Scan\_Number\_2520 Precursor m/z: 702.856 cosine: 0.807  $\alpha$ : 0.345

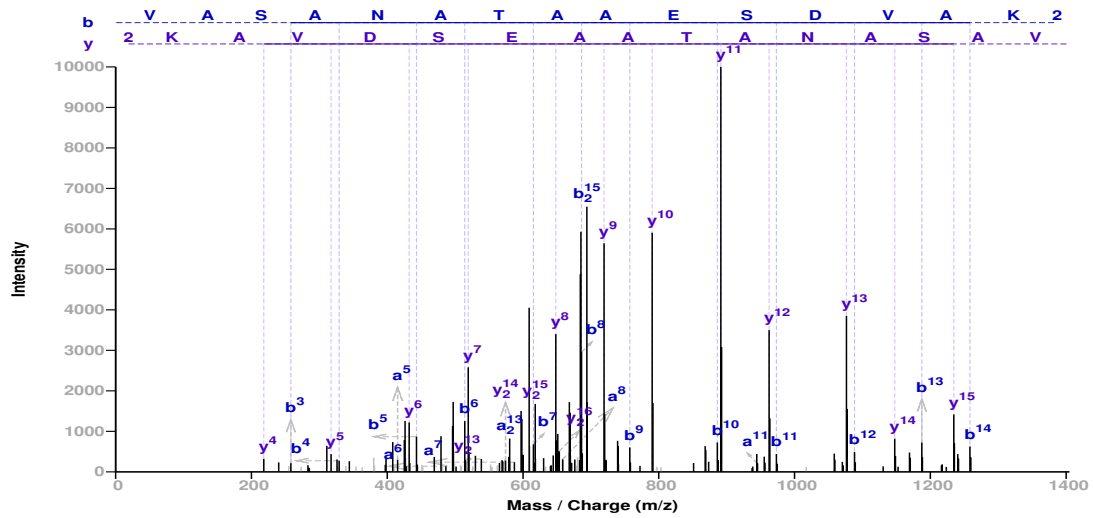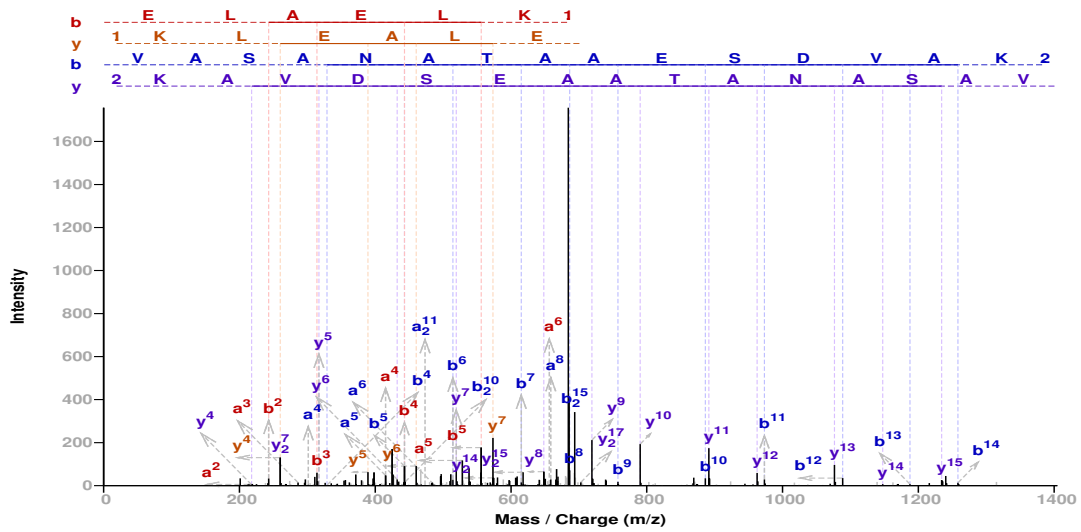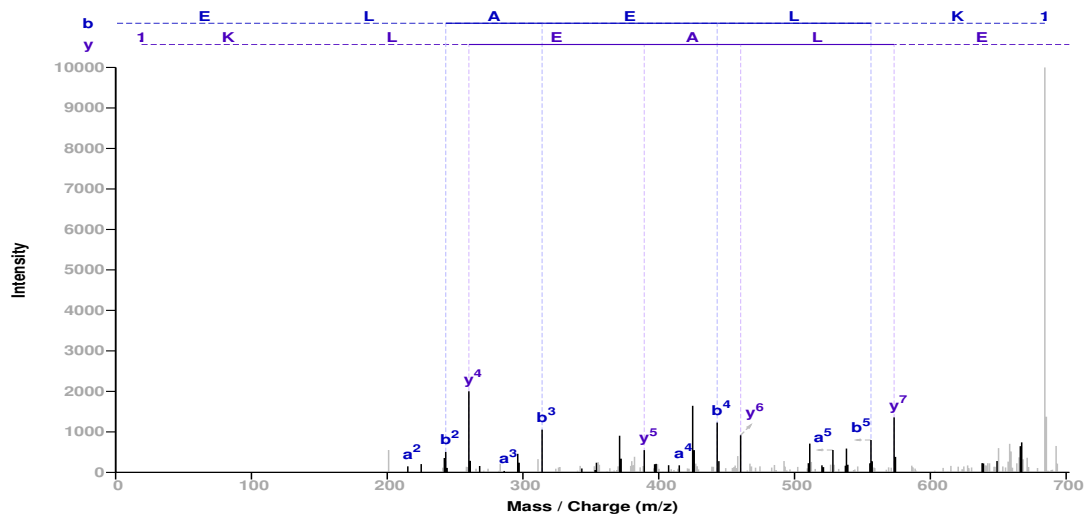

yeast2.Scan\_Number.2119 Precursor m/z: 497.909 cosine: 0.777  $\alpha$ : 0.344

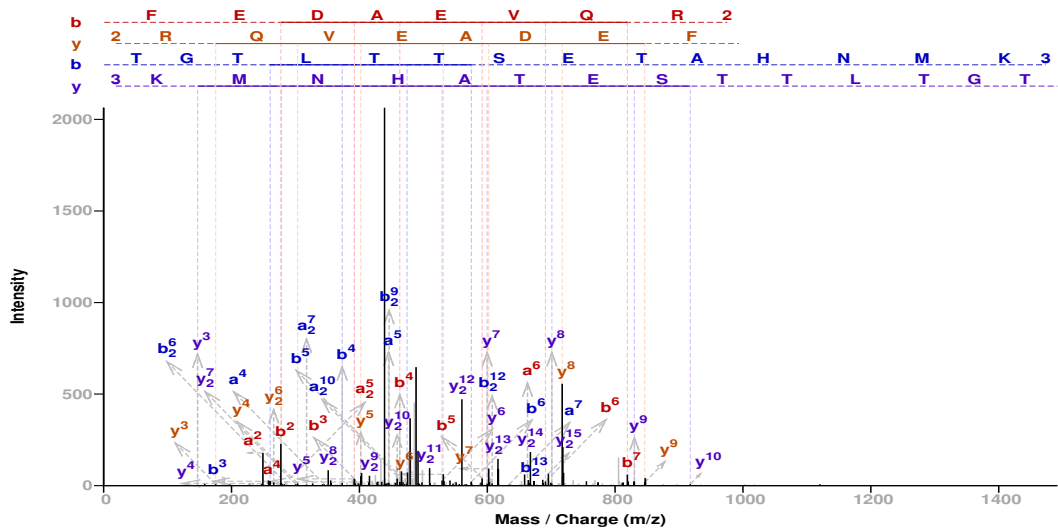

yeast2.Scan\_Number\_2070 Precursor m/z: 452.249 cosine: 0.788  $\alpha$ : 0.341

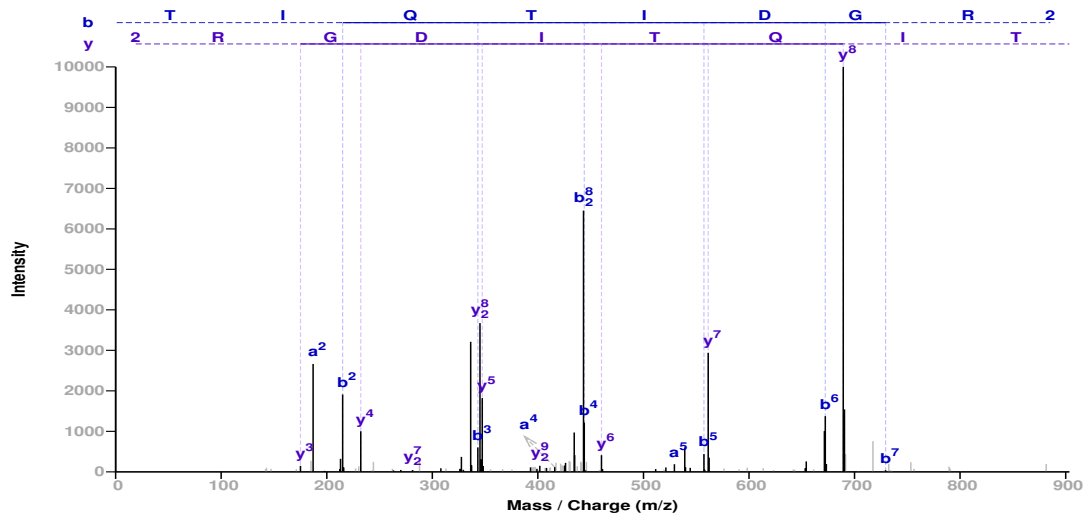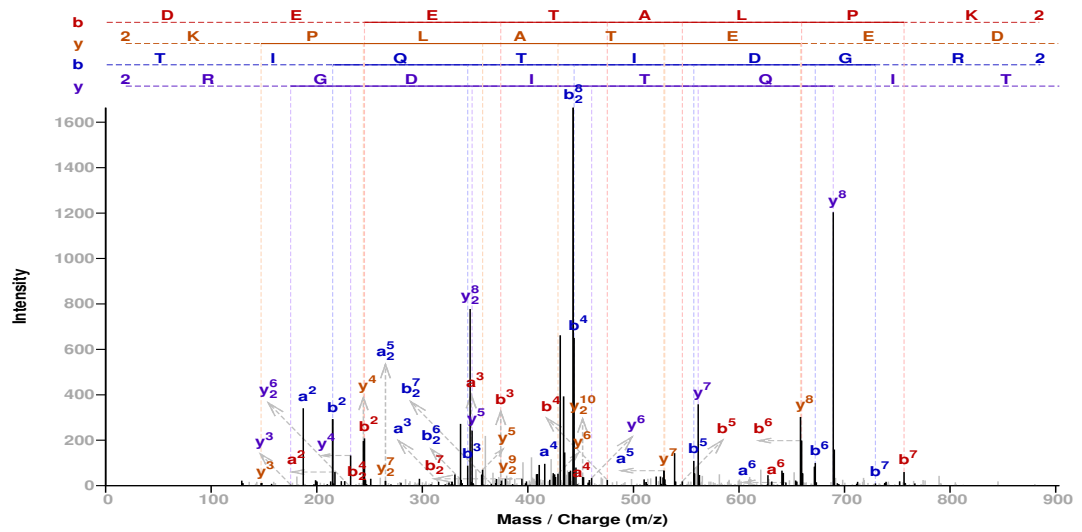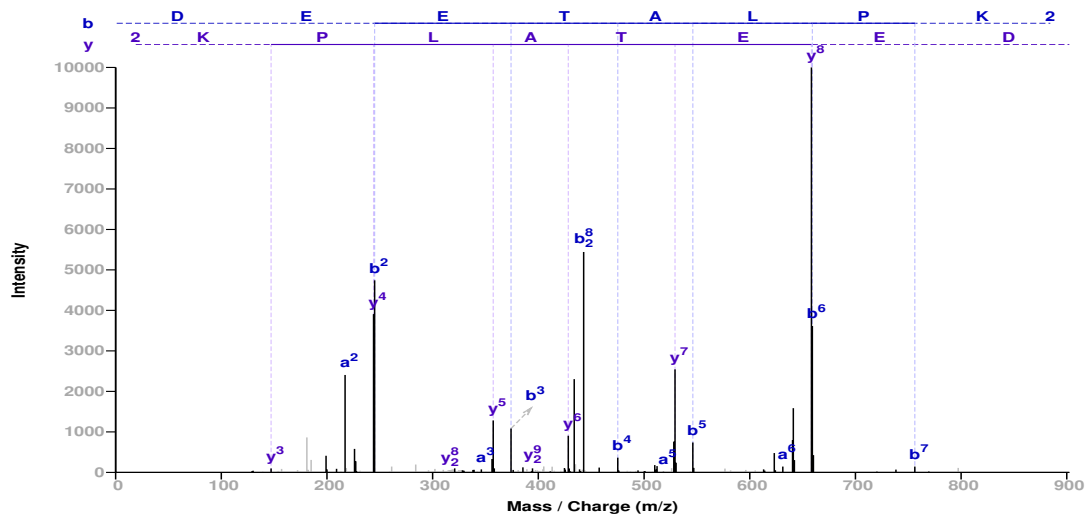

yeast2\_Scan\_Number\_9931 Precursor m/z: 594.845 cosine: 0.770  $\alpha$ : 0.340

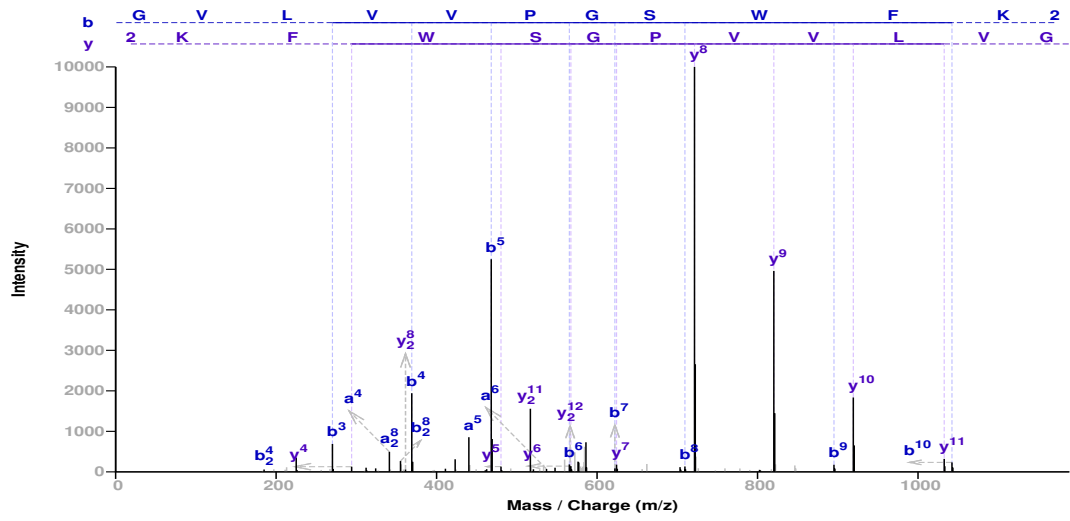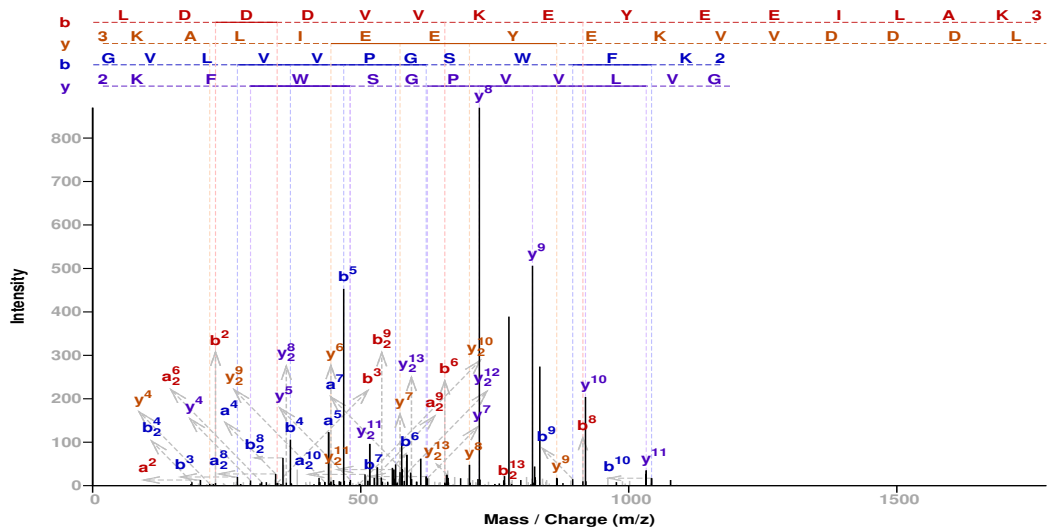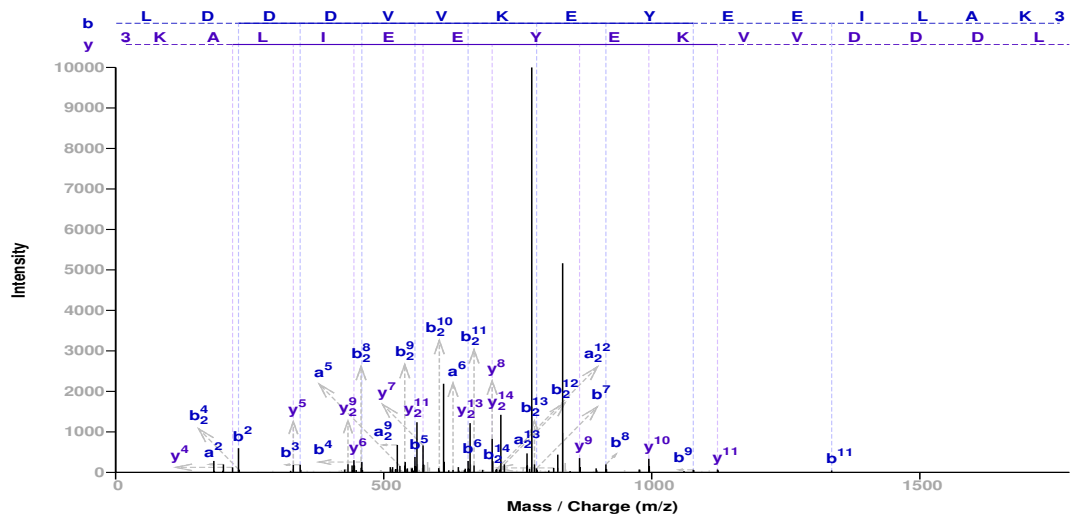

yeast2\_Scan\_Number\_4442 Precursor m/z: 432.735 cosine: 0.855  $\alpha$ : 0.333

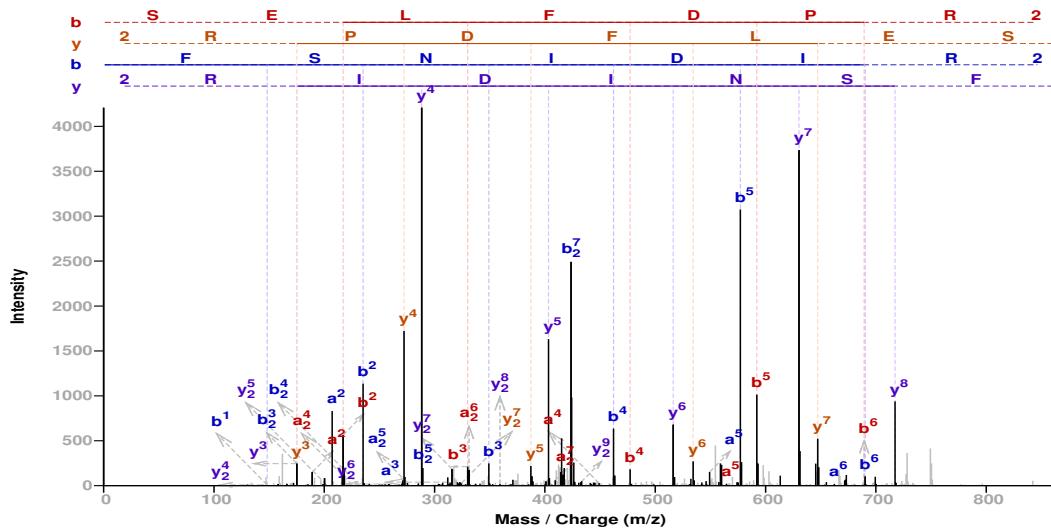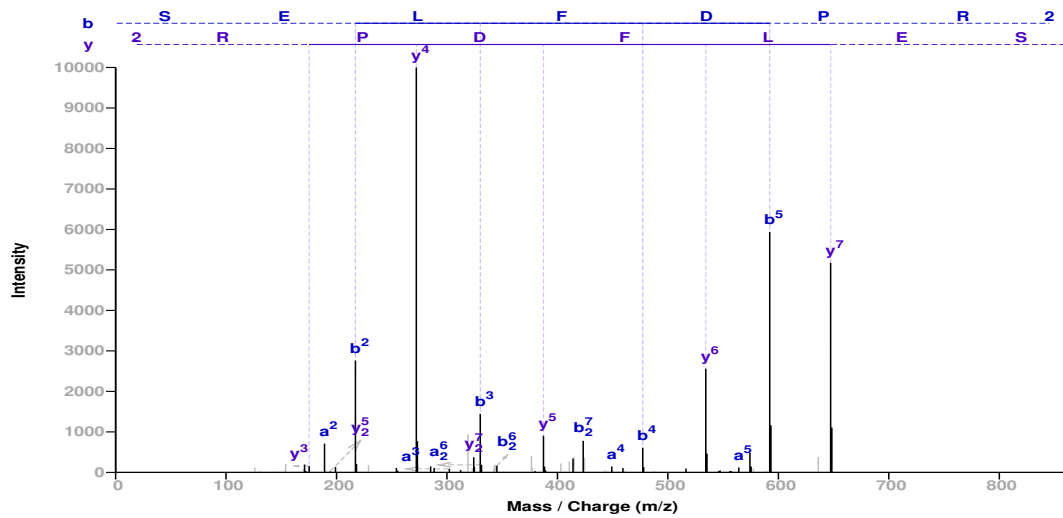



yeast2\_Scan\_Number\_6646 Precursor m/z: 475.242 cosine: 0.764  $\alpha$ : 0.332

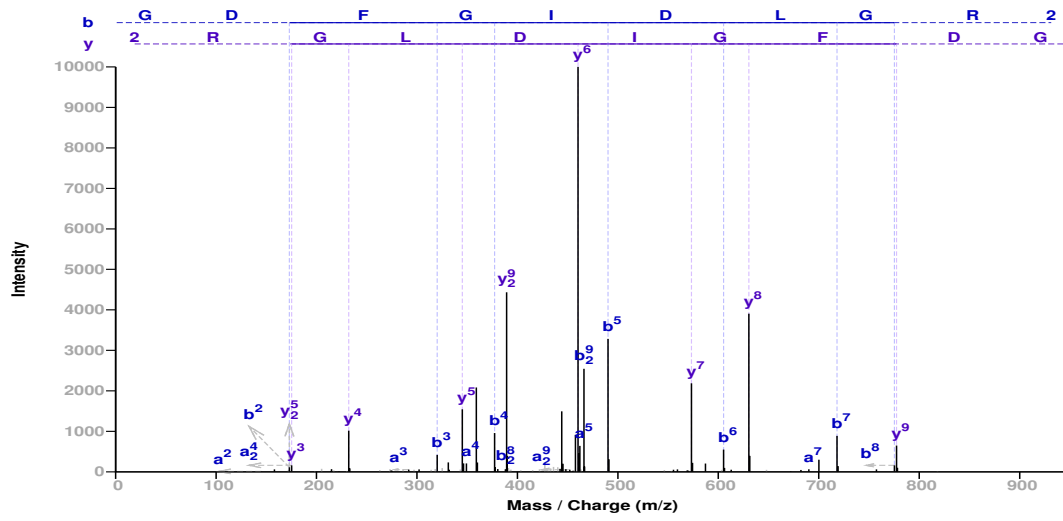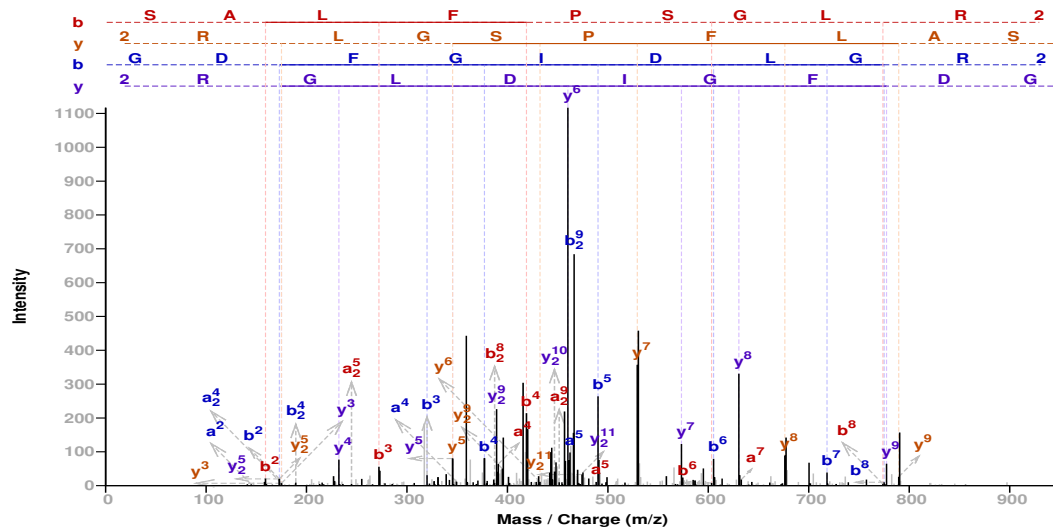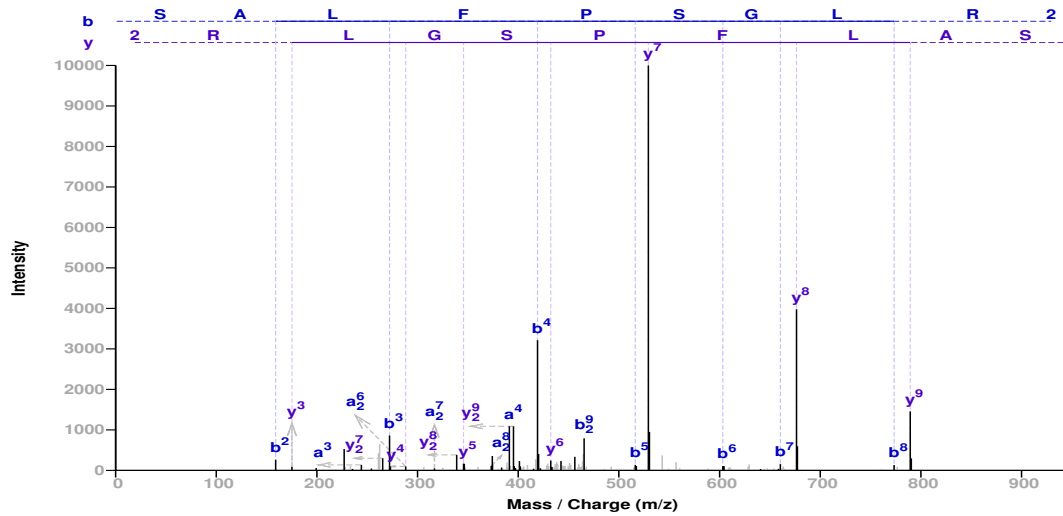

yeast2\_Scan\_Number\_9308 Precursor m/z: 763.438 cosine: 0.775  $\alpha$ : 0.332

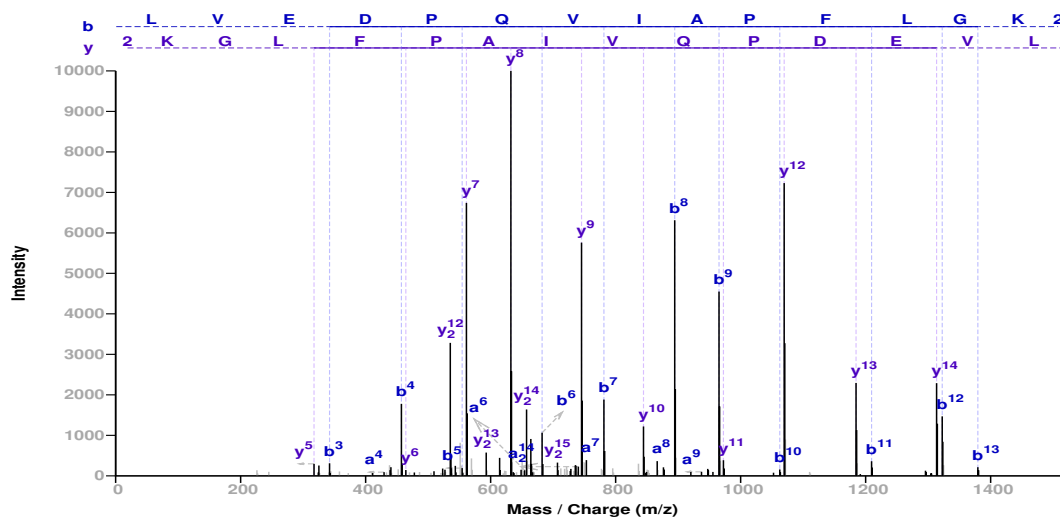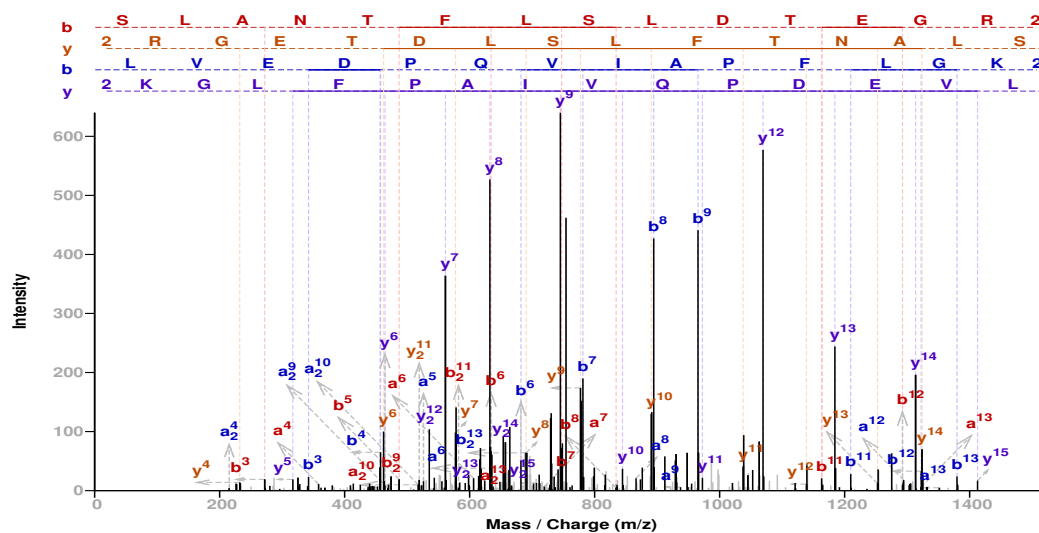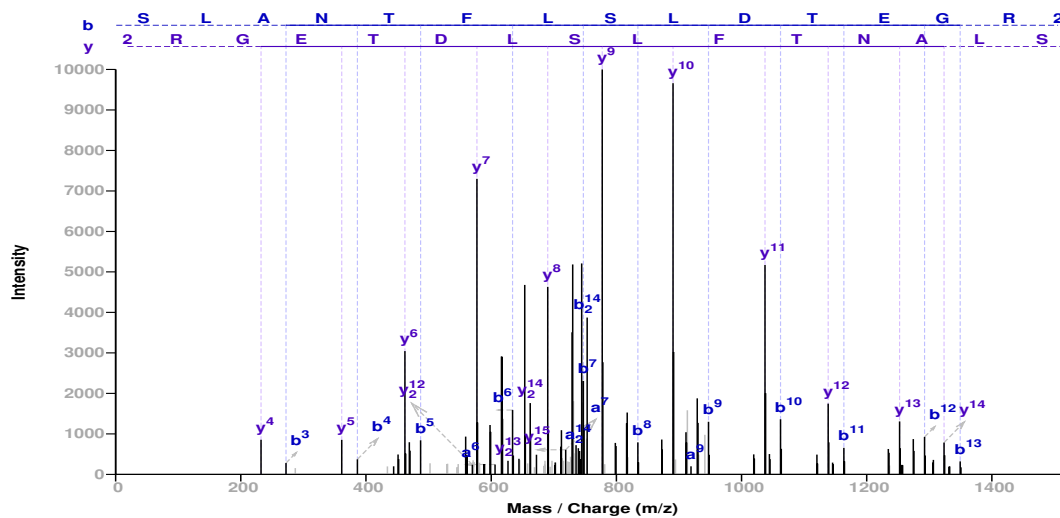

yeast2\_Scan\_Number\_3032 Precursor m/z: 479.748 cosine: 0.782  $\alpha$ : 0.332

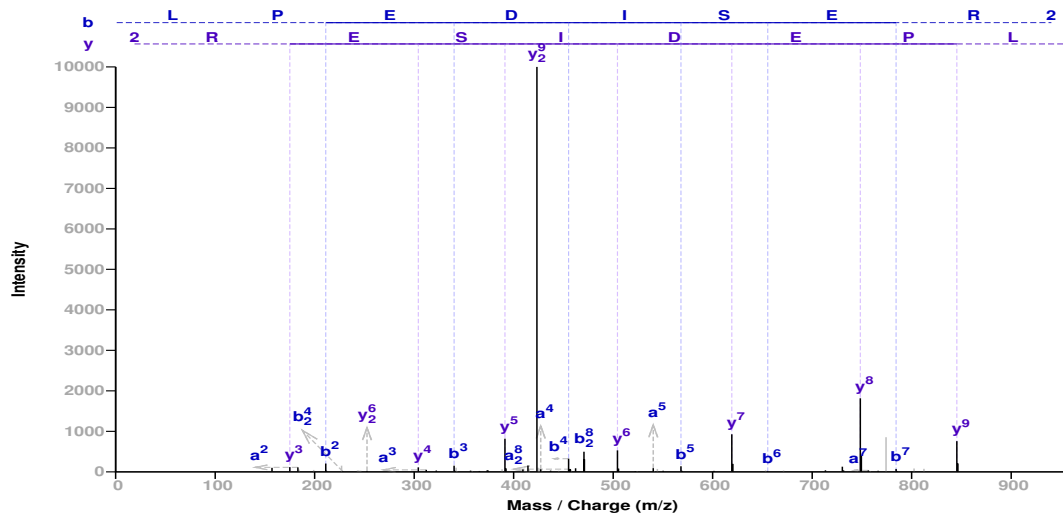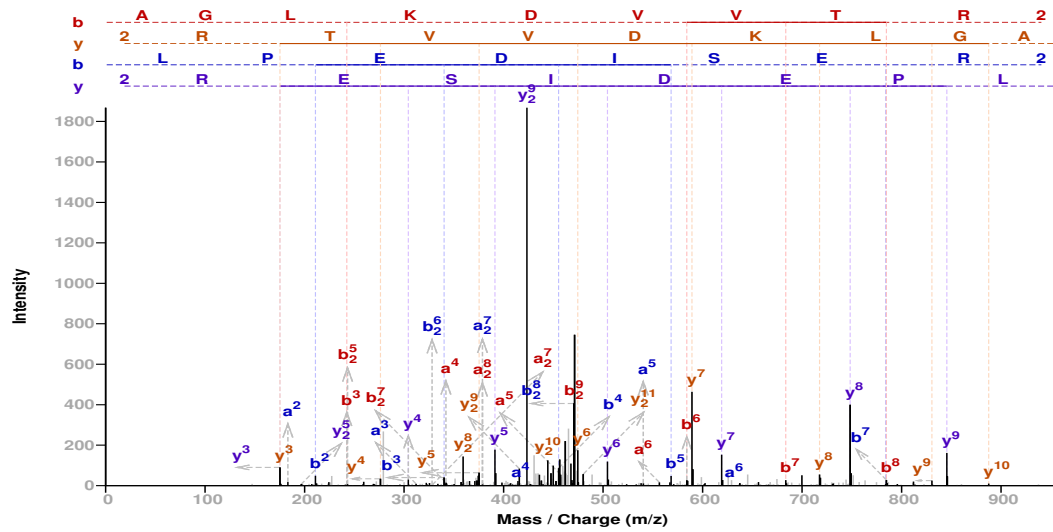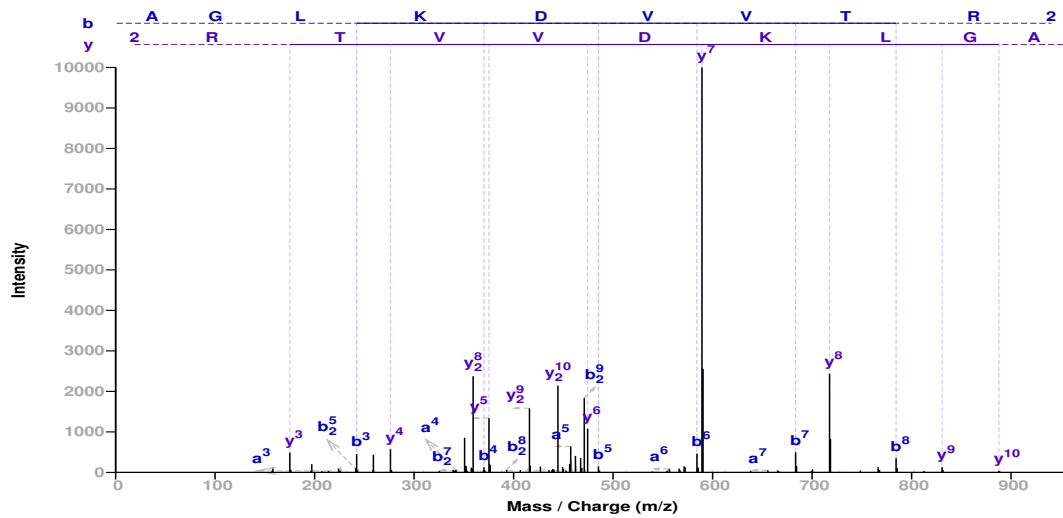

yeast2\_Scan\_Number\_4589 Precursor m/z: 473.267 cosine: 0.732  $\alpha$ : 0.329

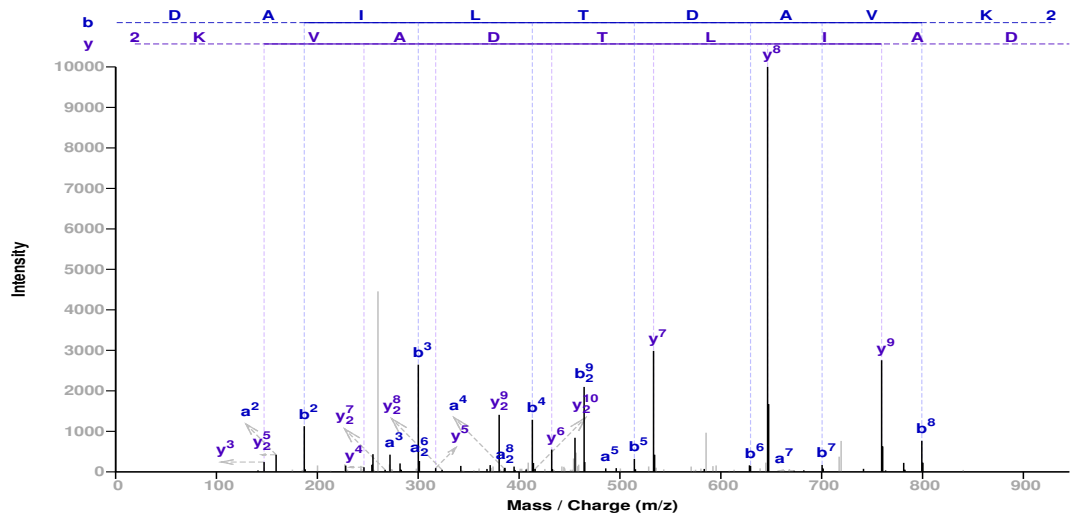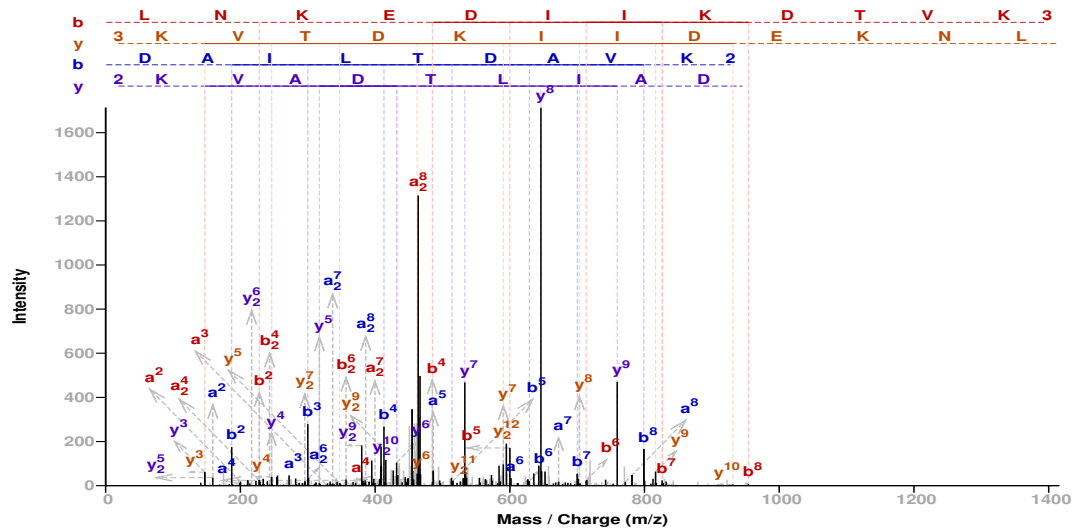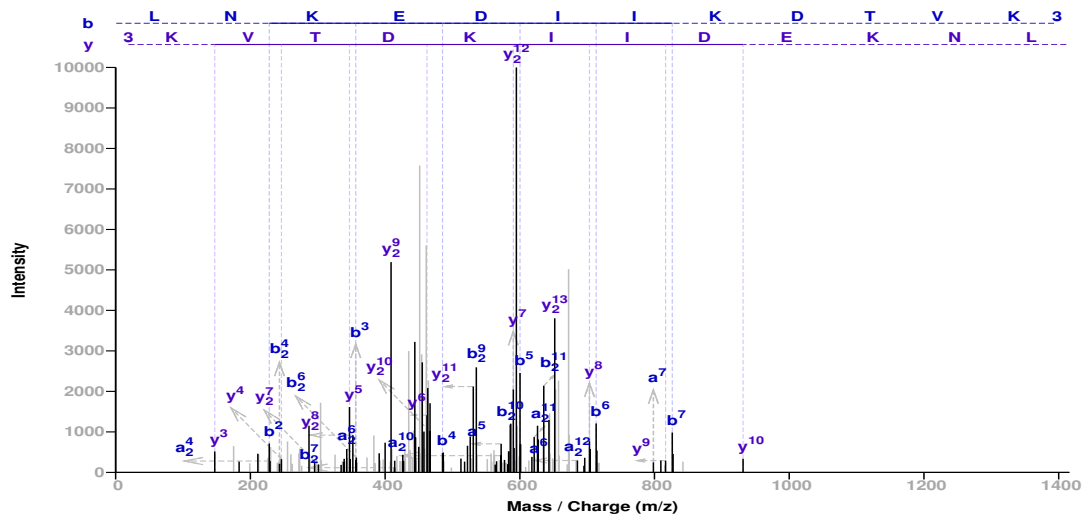



yeast2\_Scan\_Number\_1098 Precursor m/z: 443.279 cosine: 0.831  $\alpha$ : 0.327

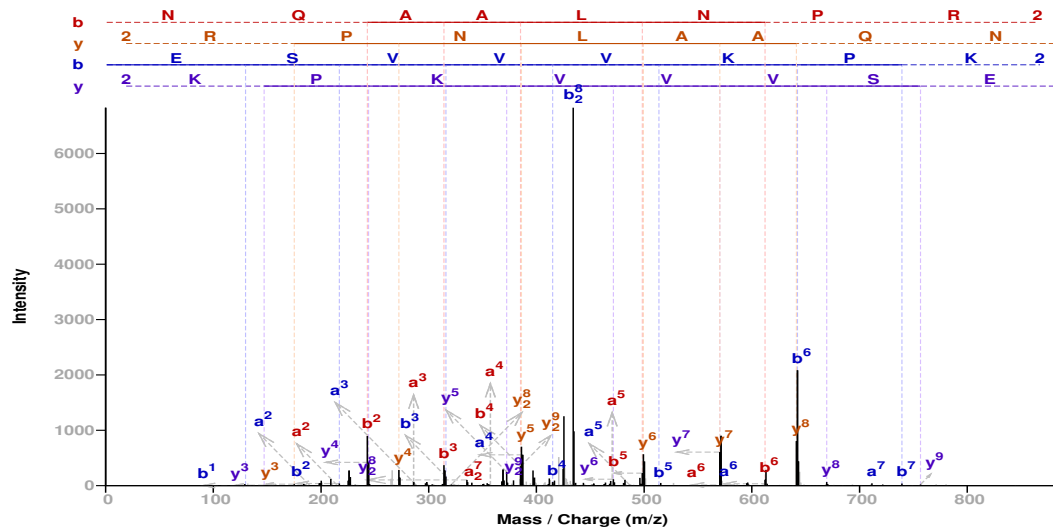

yeast2.Scan\_Number\_3160 Precursor m/z: 352.212 cosine: 0.927  $\alpha$ : 0.325

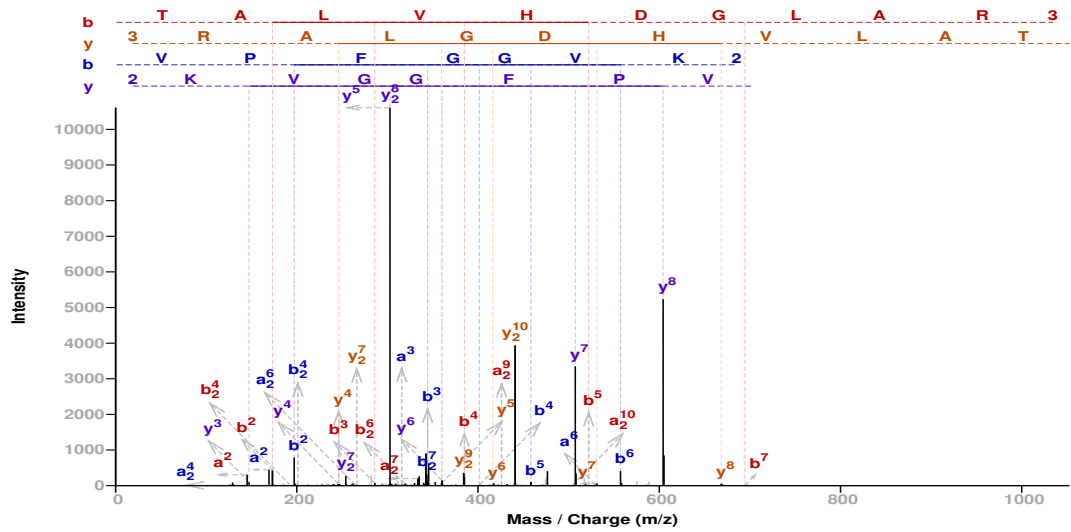

yeast2.Scan\_Number\_4823 Precursor m/z: 540.272 cosine: 0.759  $\alpha$ : 0.325

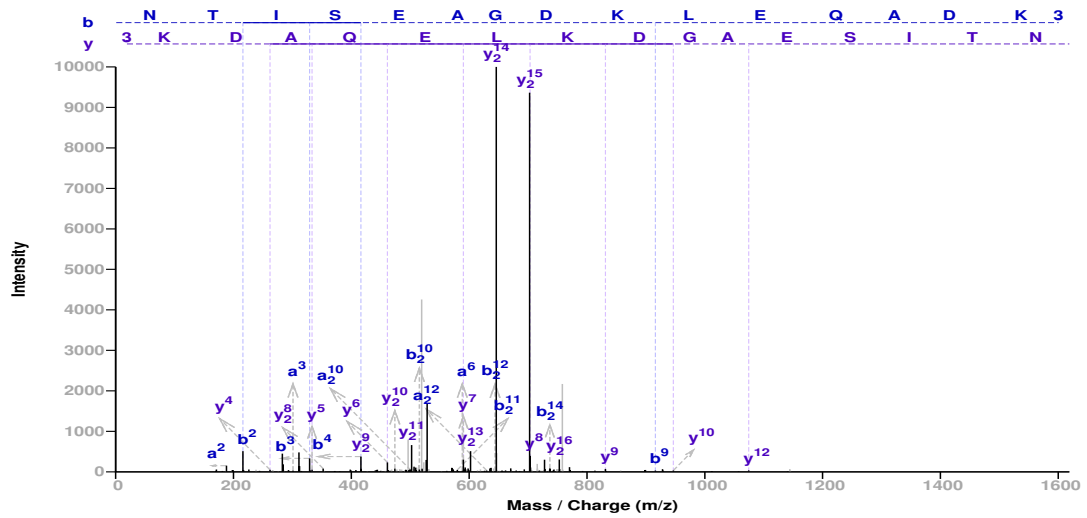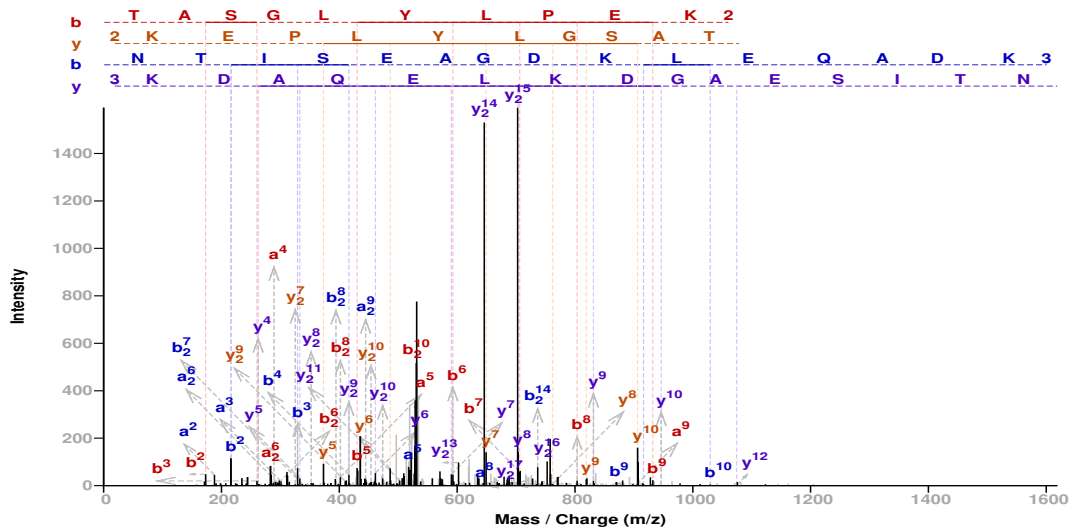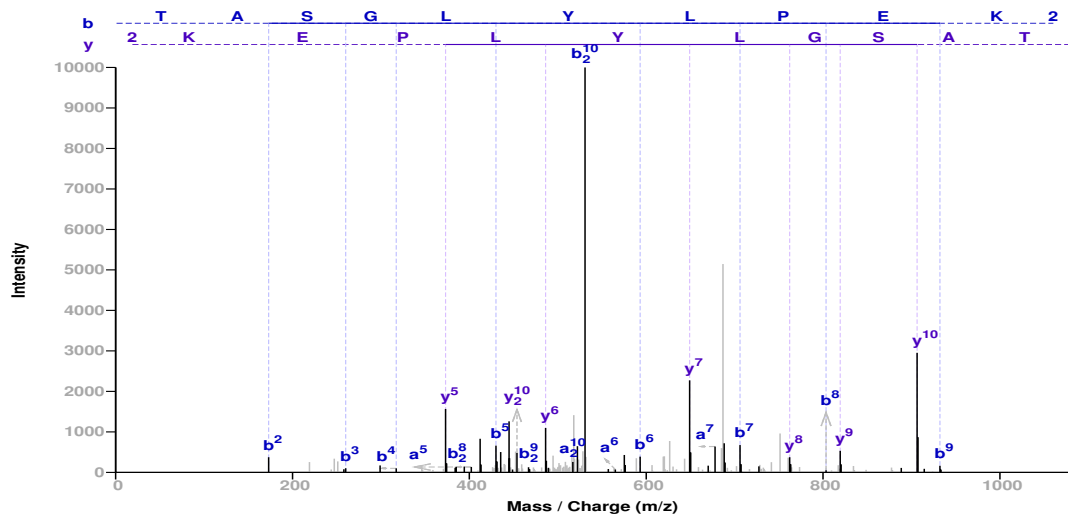



yeast2\_Scan\_Number\_4074 Precursor m/z: 480.214 cosine: 0.807  $\alpha$ : 0.324

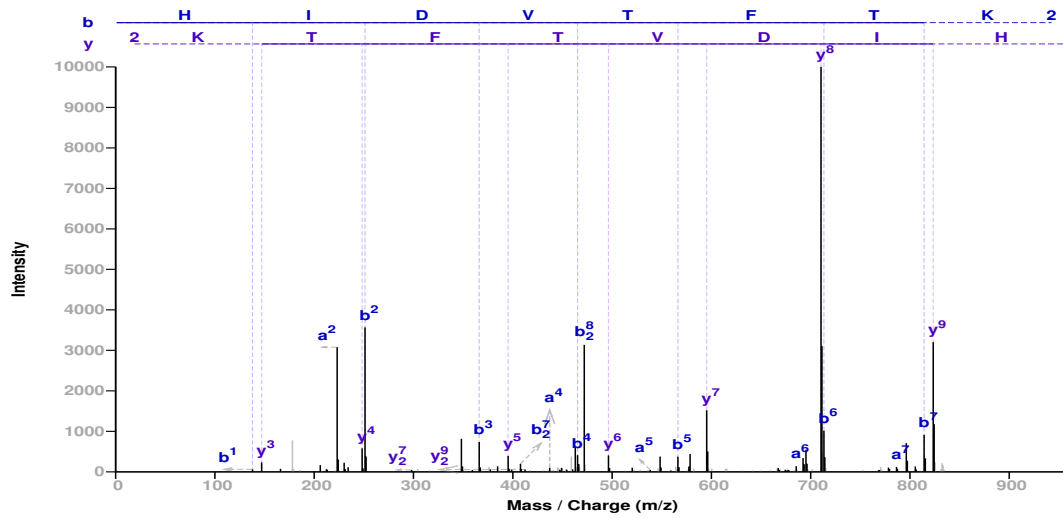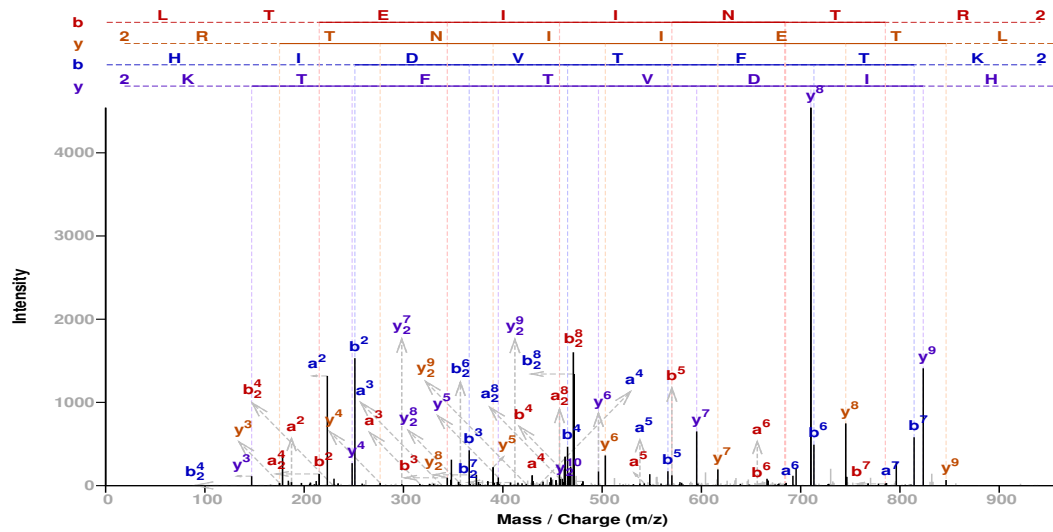

yeast2\_Scan\_Number\_848 Precursor m/z: 425.229 cosine: 0.826  $\alpha$ : 0.324

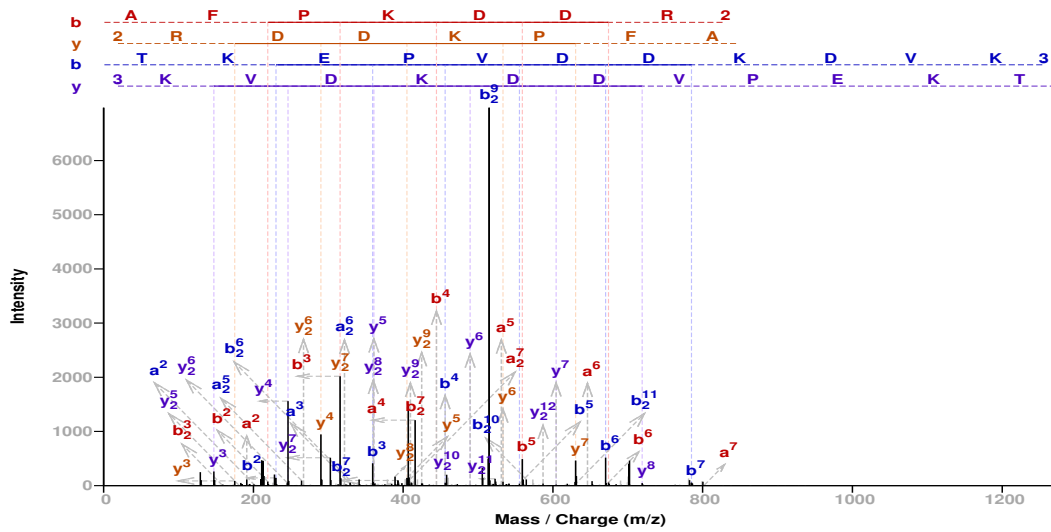

yeast2\_Scan\_Number\_2496 Precursor m/z: 426.747 cosine: 0.802  $\alpha$ : 0.320

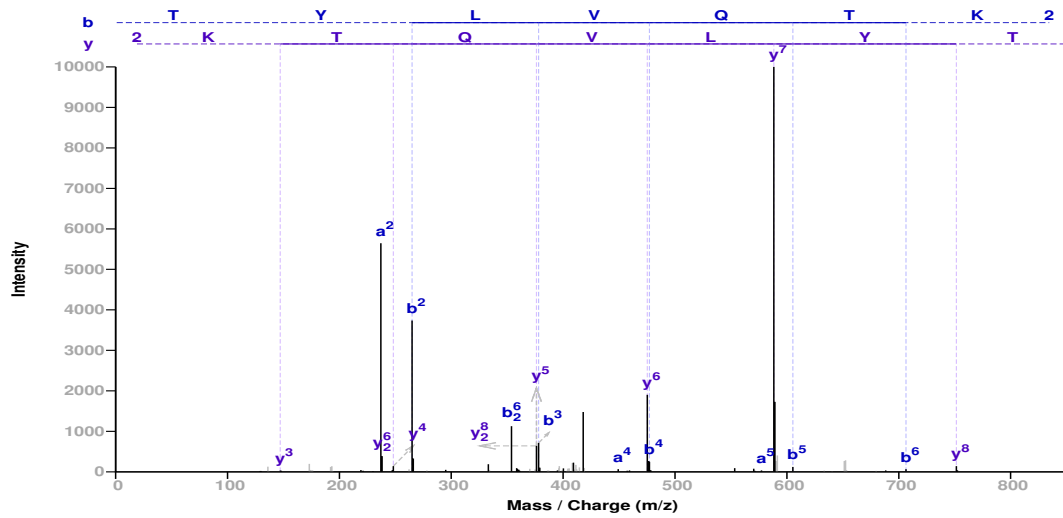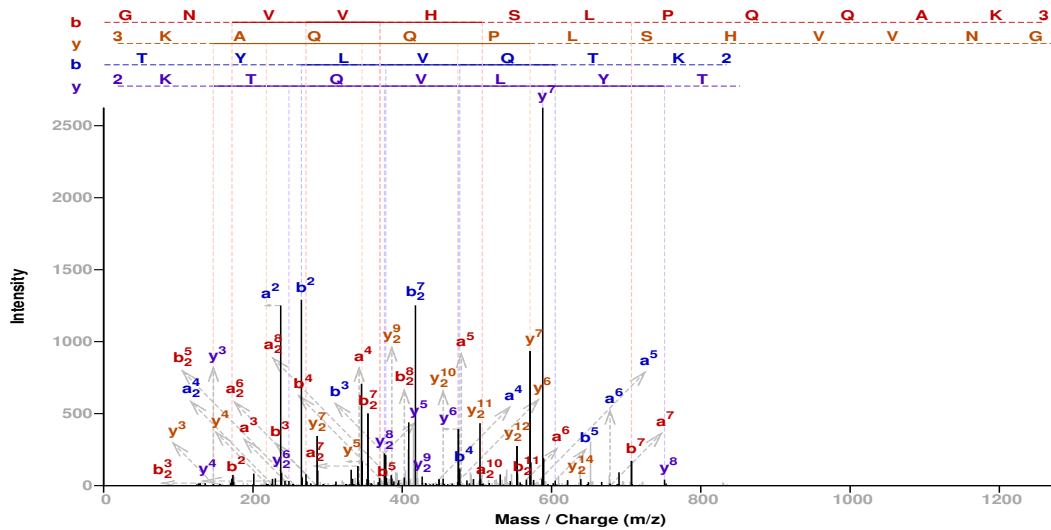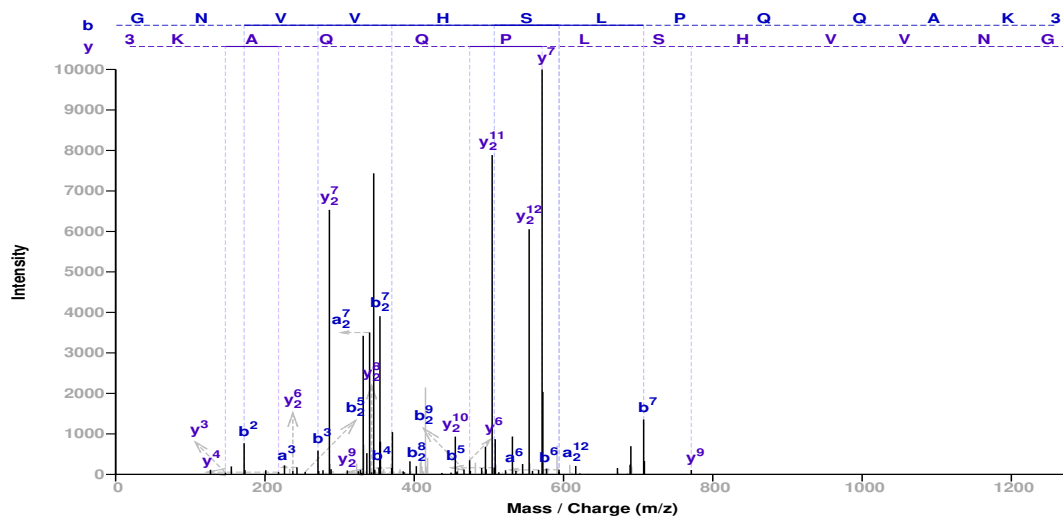

yeast2.Scan\_Number.1428 Precursor m/z: 530.298 cosine: 0.820  $\alpha$ : 0.319

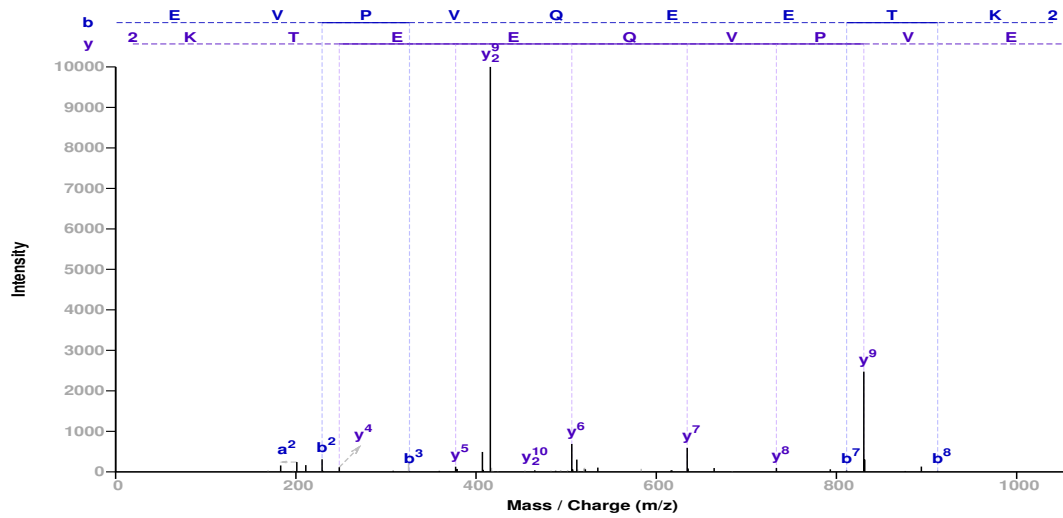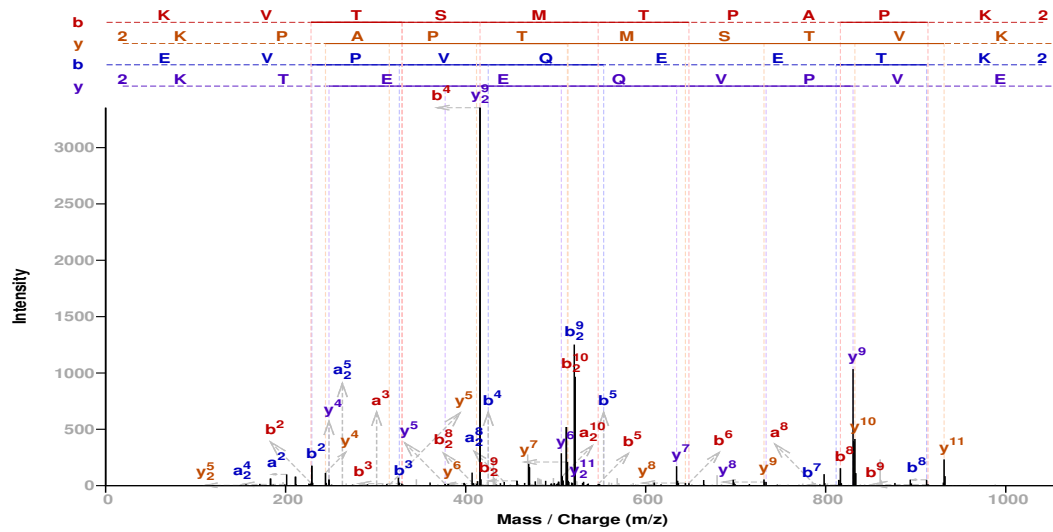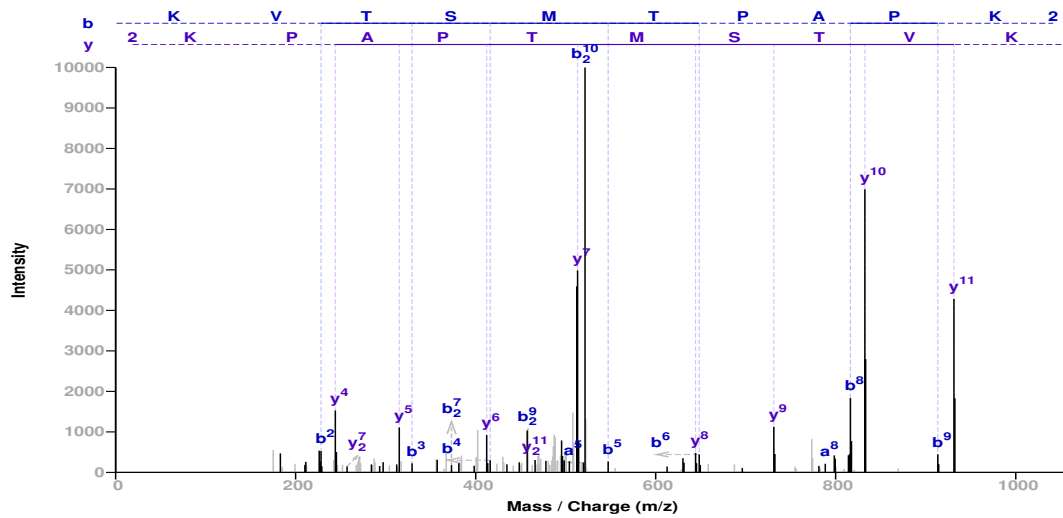

yeast2\_Scan\_Number\_3877 Precursor m/z: 512.950 cosine: 0.728  $\alpha$ : 0.315

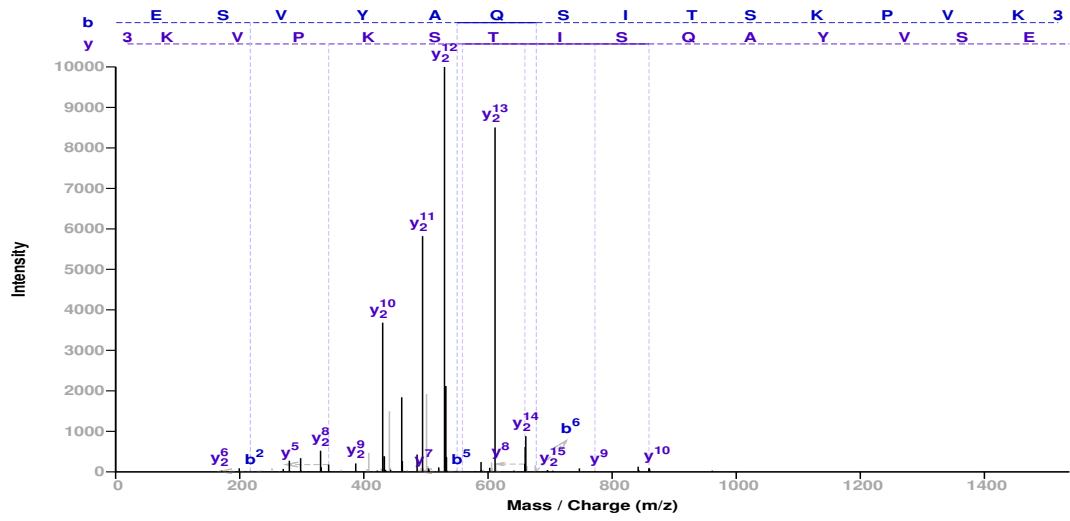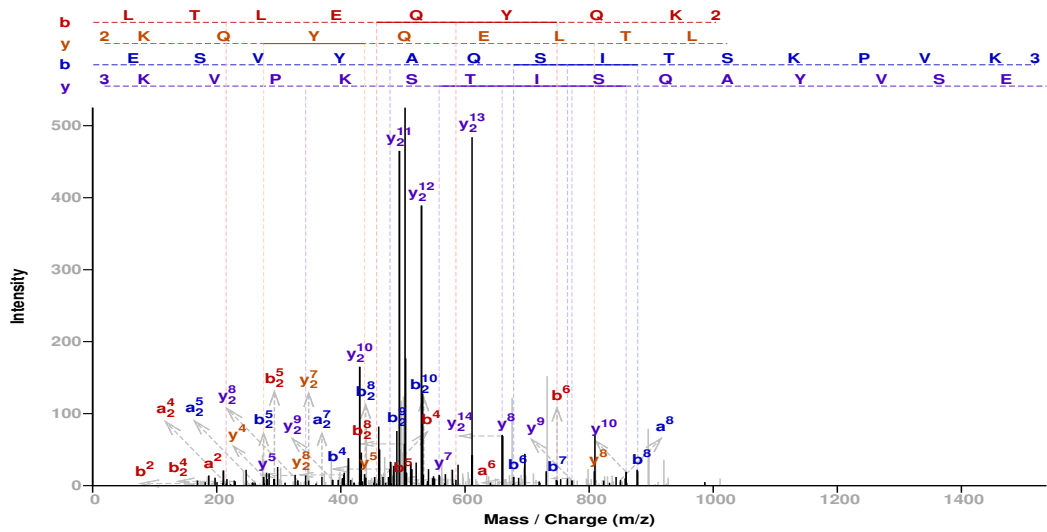

yeast2\_Scan\_Number\_8916 Precursor m/z: 724.377 cosine: 0.790  $\alpha$ : 0.314

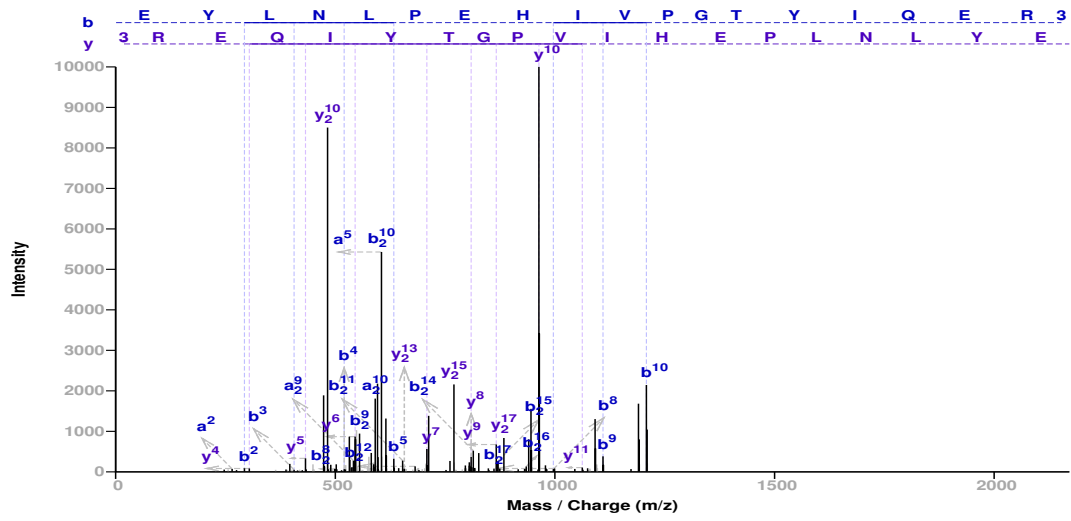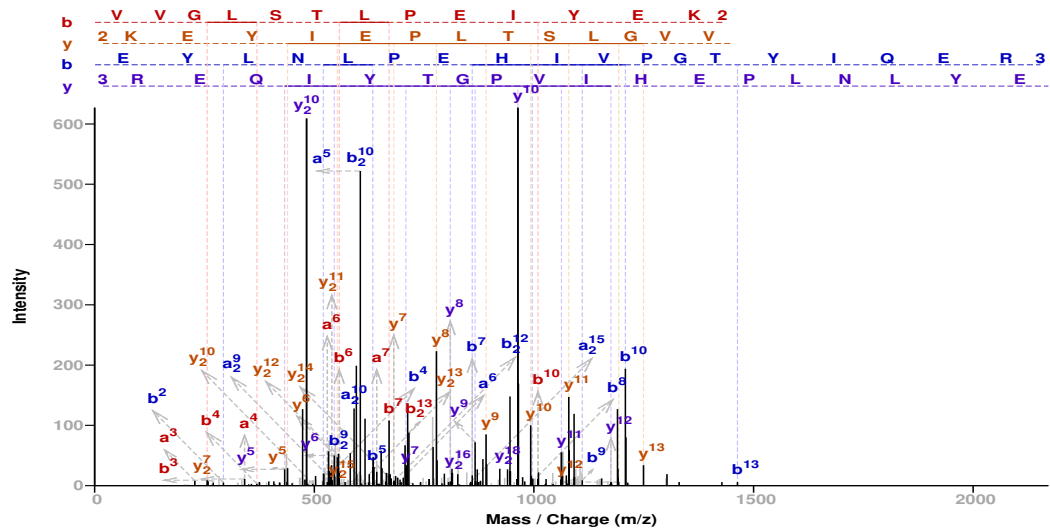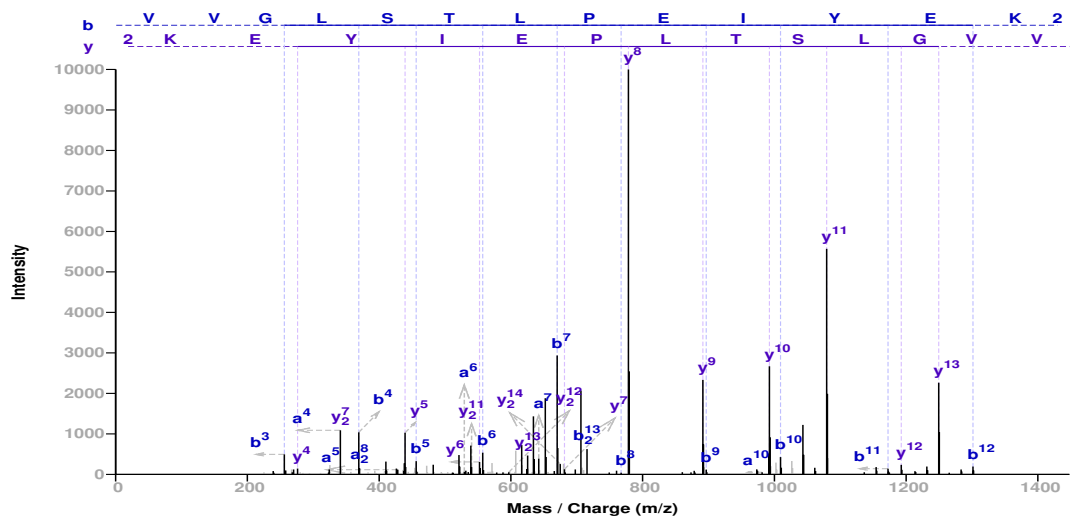

yeast2\_Scan\_Number\_6293 Precursor m/z: 598.817 cosine: 0.798  $\alpha$ : 0.312

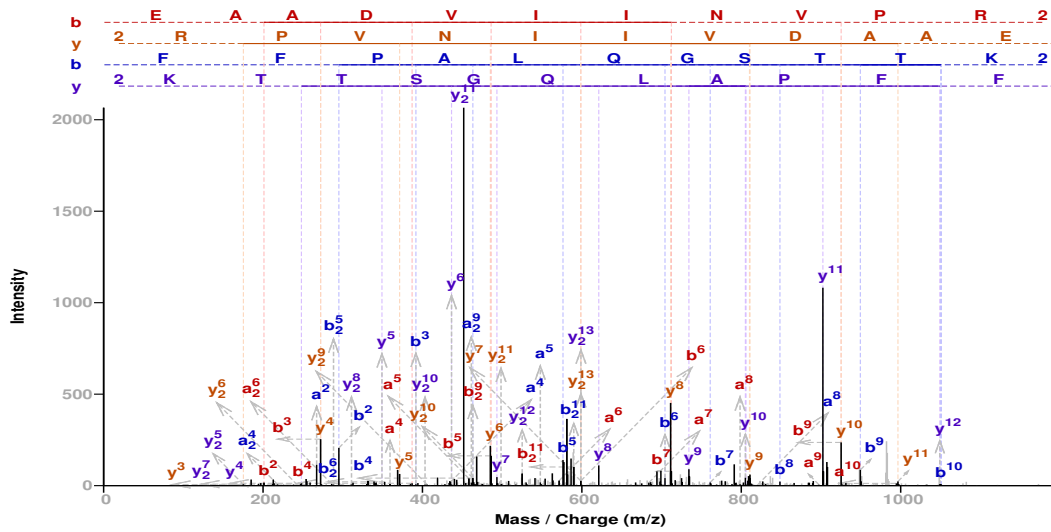

yeast2\_Scan\_Number\_2221 Precursor m/z: 795.049 cosine: 0.765  $\alpha$ : 0.298

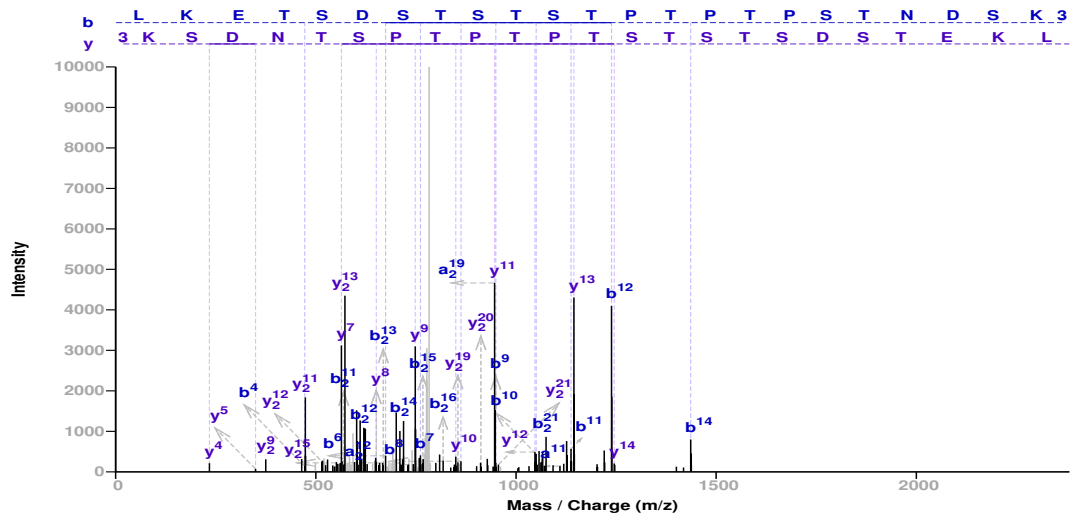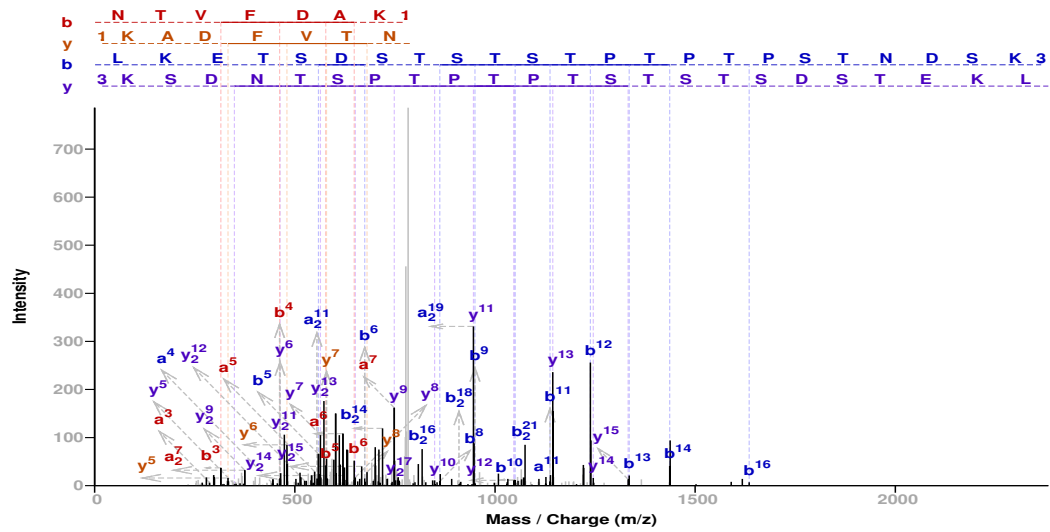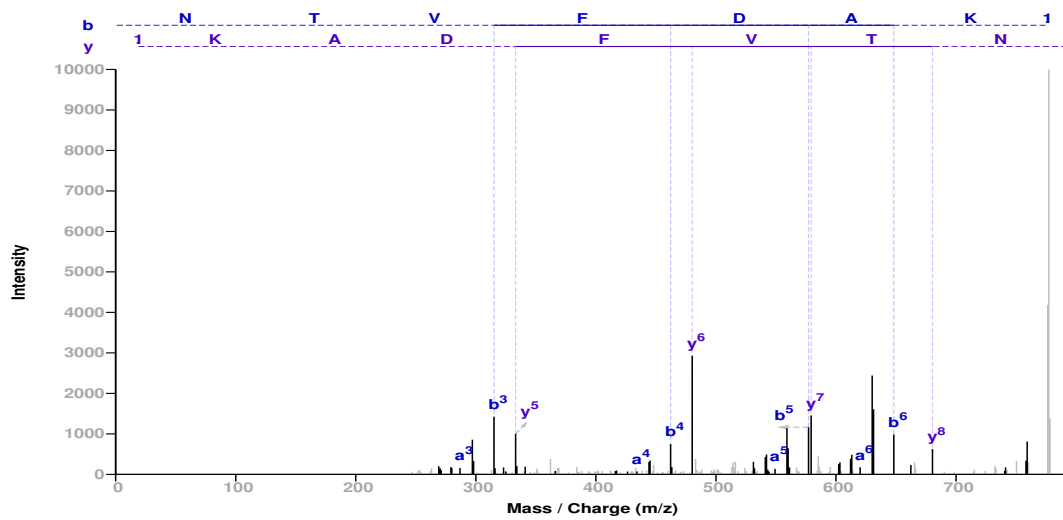



yeast2\_Scan\_Number\_4562 Precursor m/z: 554.822 cosine: 0.888  $\alpha$ : 0.297

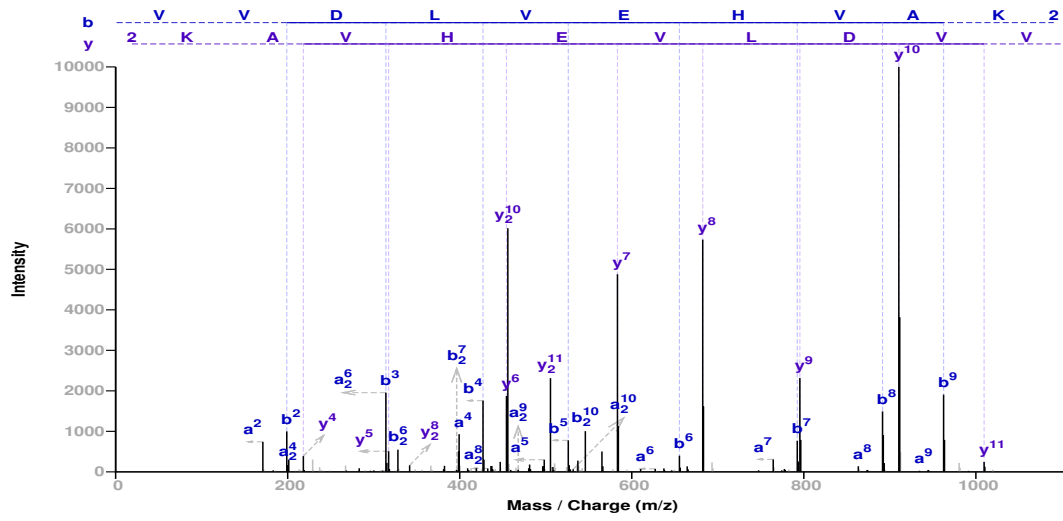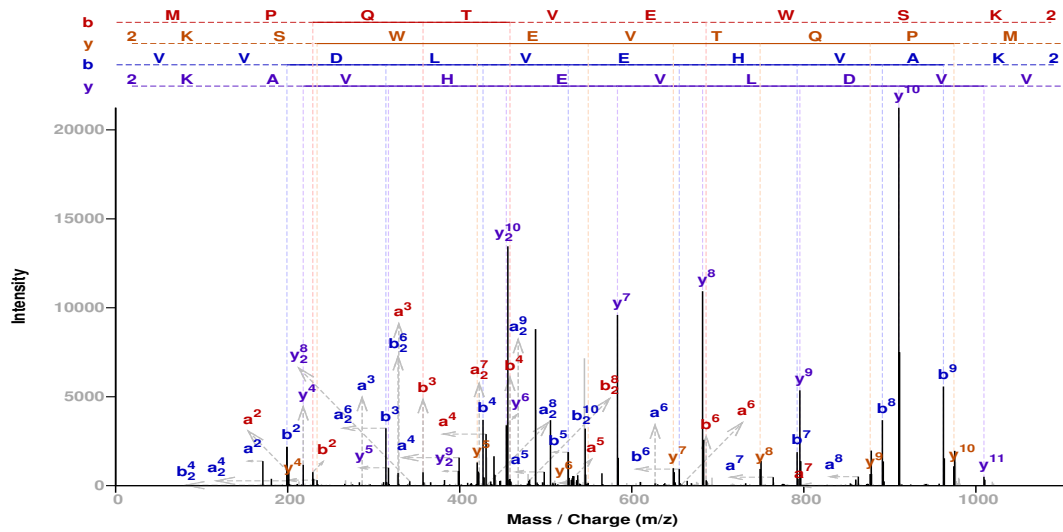

yeast2.Scan\_Number\_6526 Precursor m/z: 390.721 cosine: 0.848  $\alpha$ : 0.291

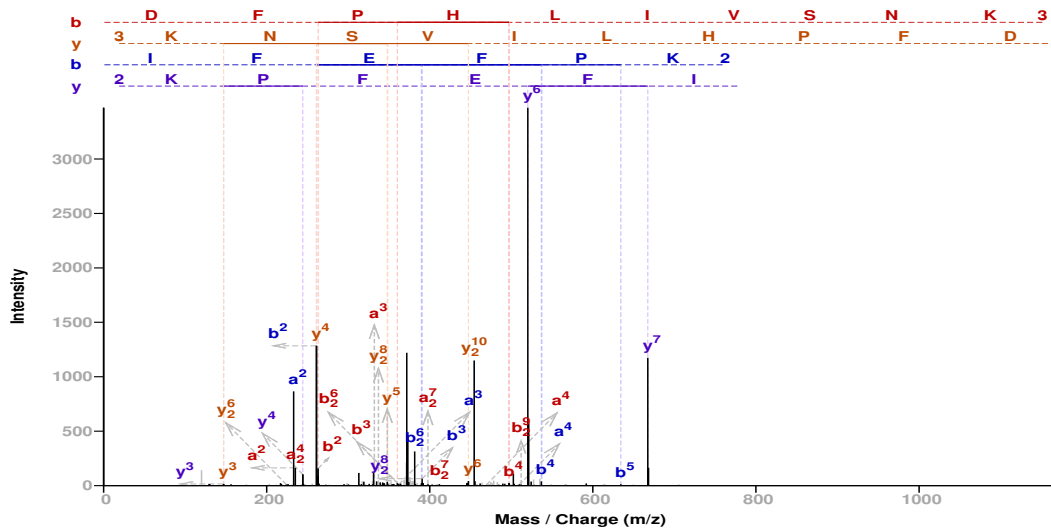

yeast2\_Scan\_Number\_2846 Precursor m/z: 423.897 cosine: 0.910  $\alpha$ : 0.290

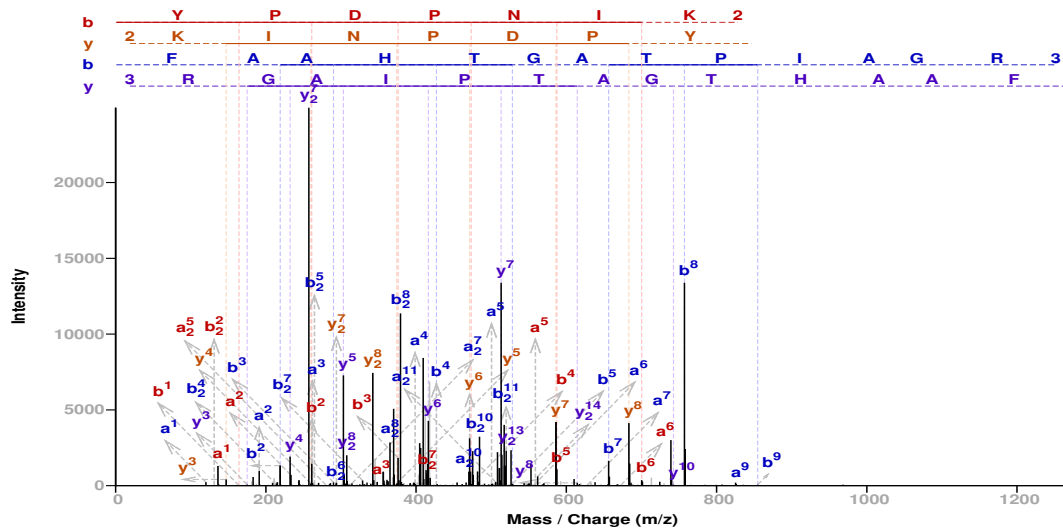

yeast2\_Scan\_Number\_577 Precursor m/z: 409.228 cosine: 0.816  $\alpha$ : 0.287

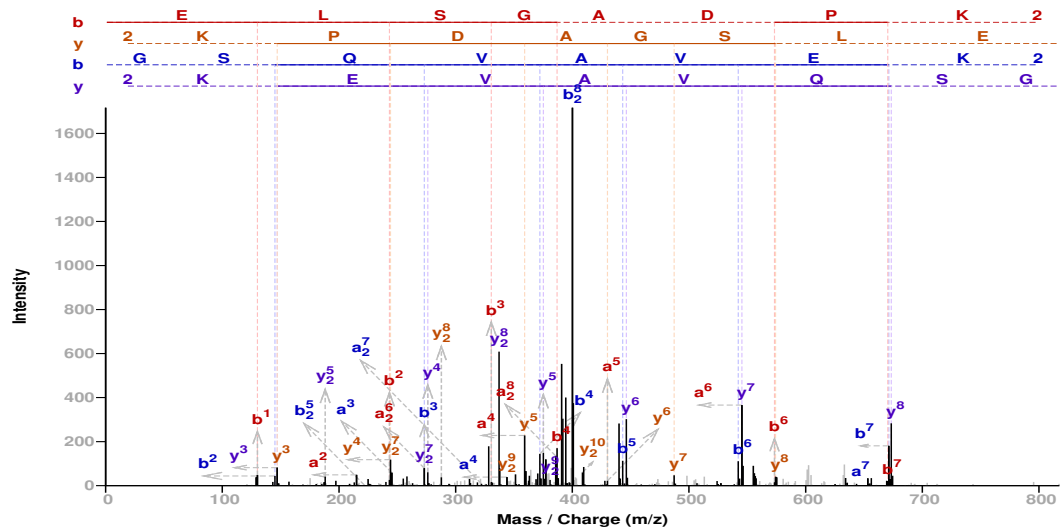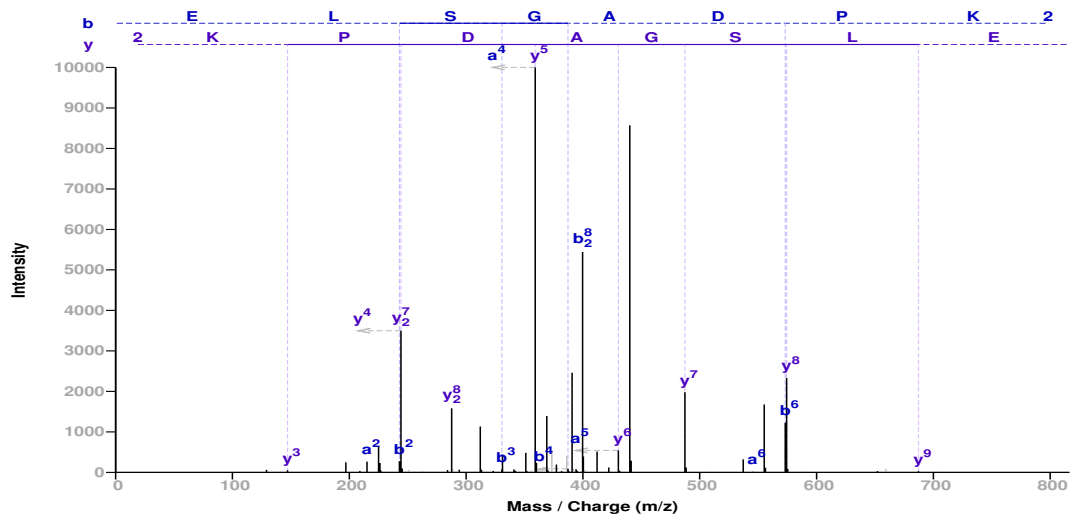

yeast2.Scan\_Number.1332 Precursor m/z: 406.216 cosine: 0.757  $\alpha$ : 0.286

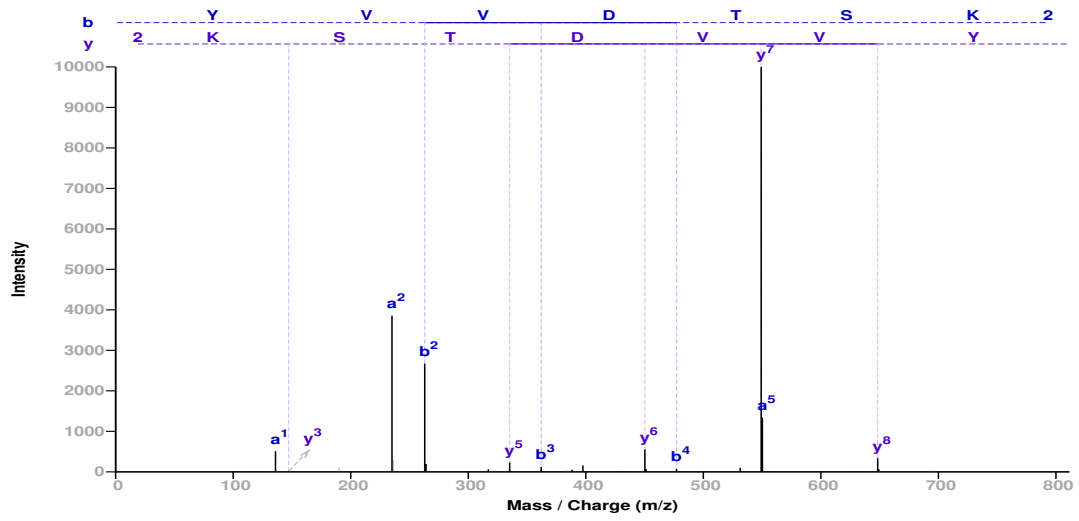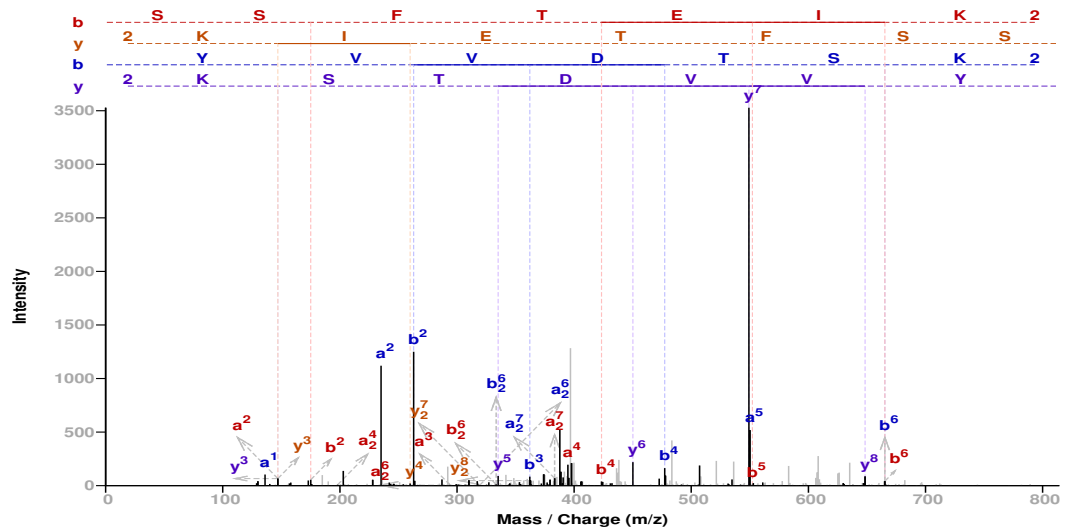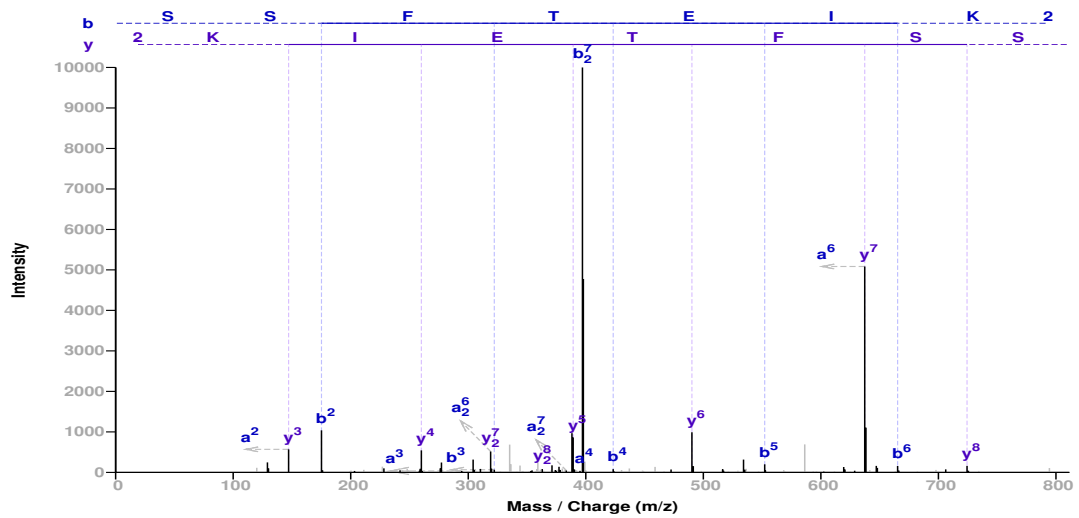

yeast2.Scan\_Number\_6517 Precursor m/z: 457.789 cosine: 0.764  $\alpha$ : 0.286

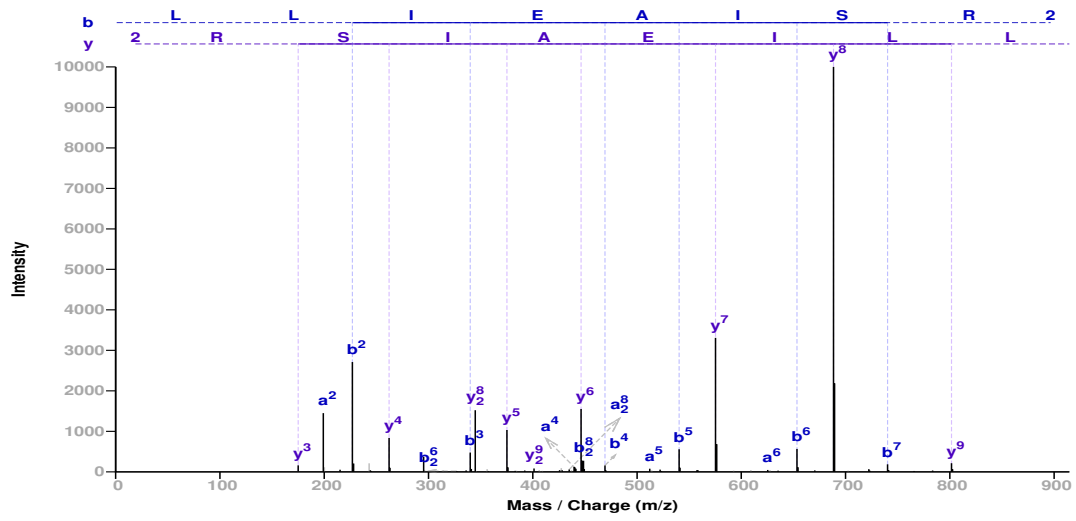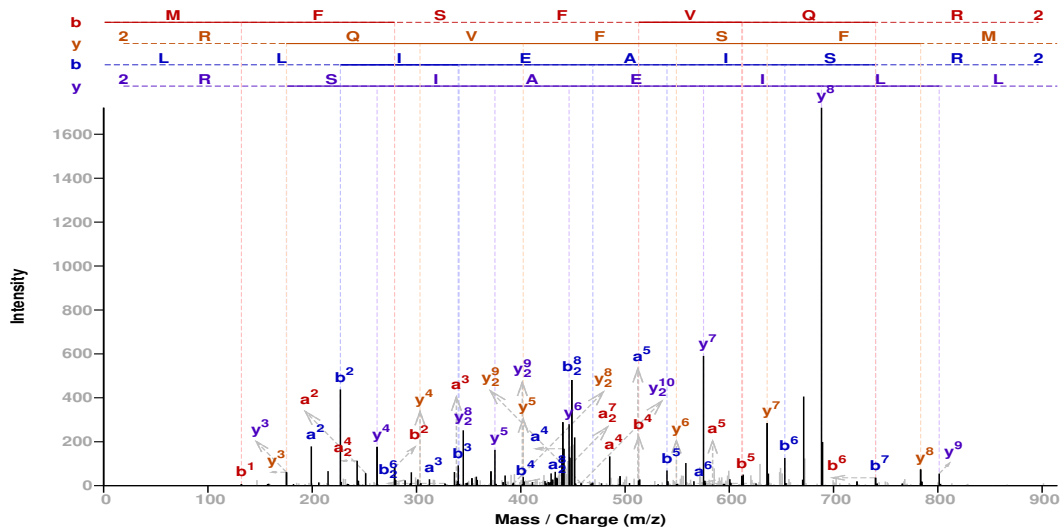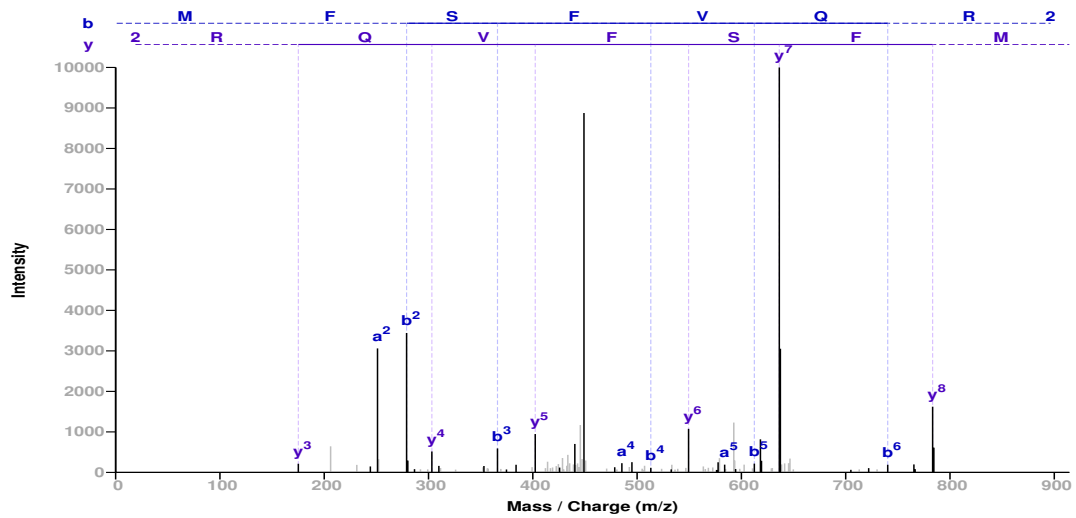



yeast2.Scan\_Number.2621 Precursor m/z: 520.259 cosine: 0.795  $\alpha$ : 0.281

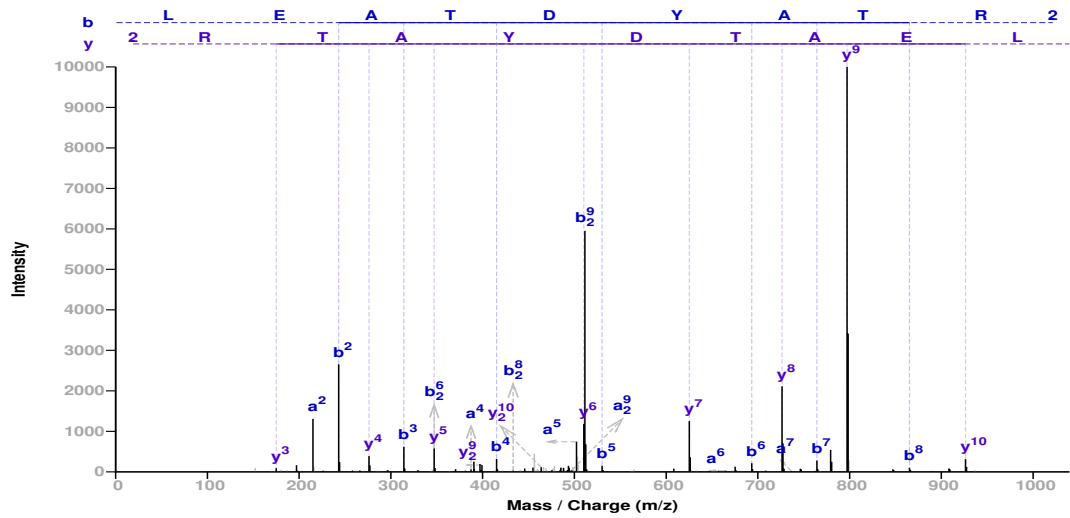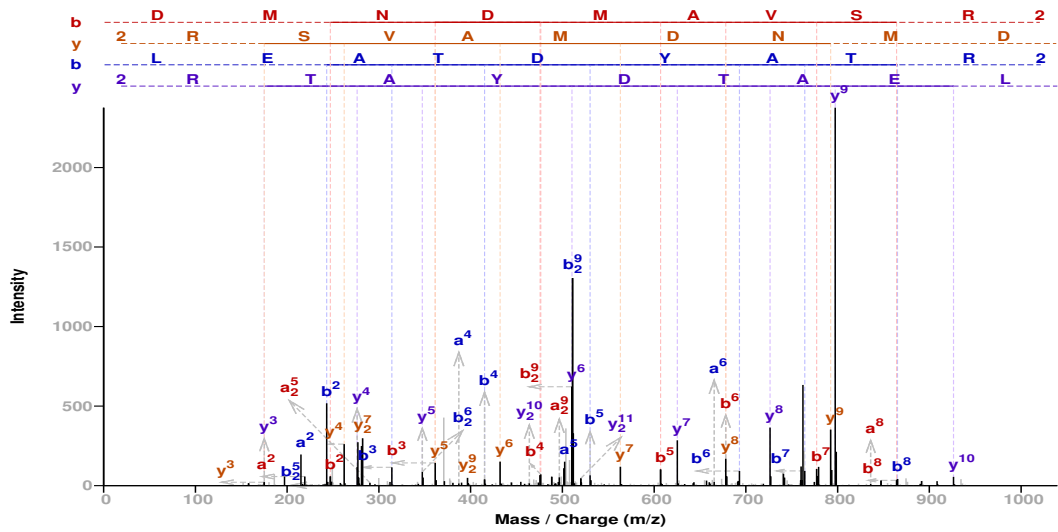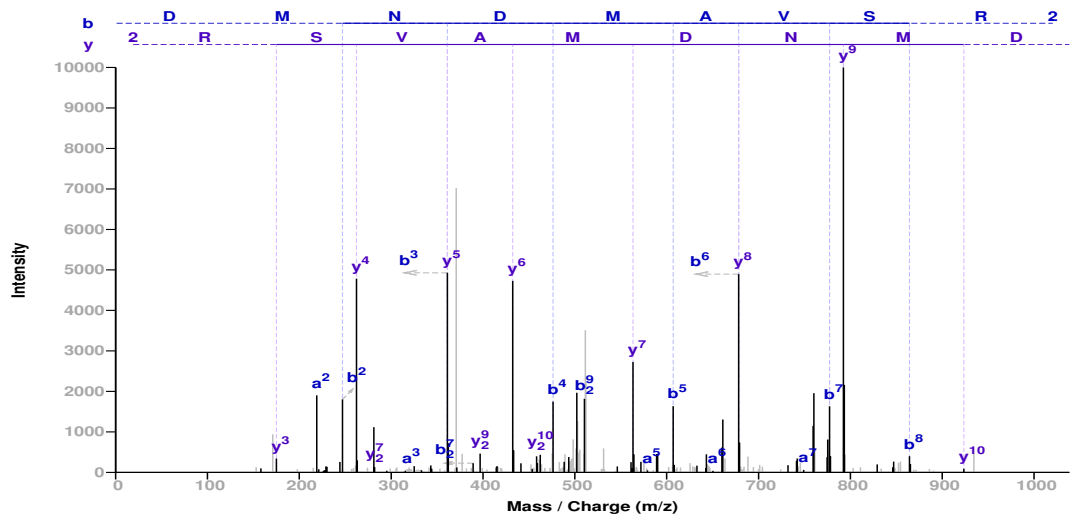



yeast2\_Scan\_Number\_2870 Precursor m/z: 480.753 cosine: 0.758  $\alpha$ : 0.273

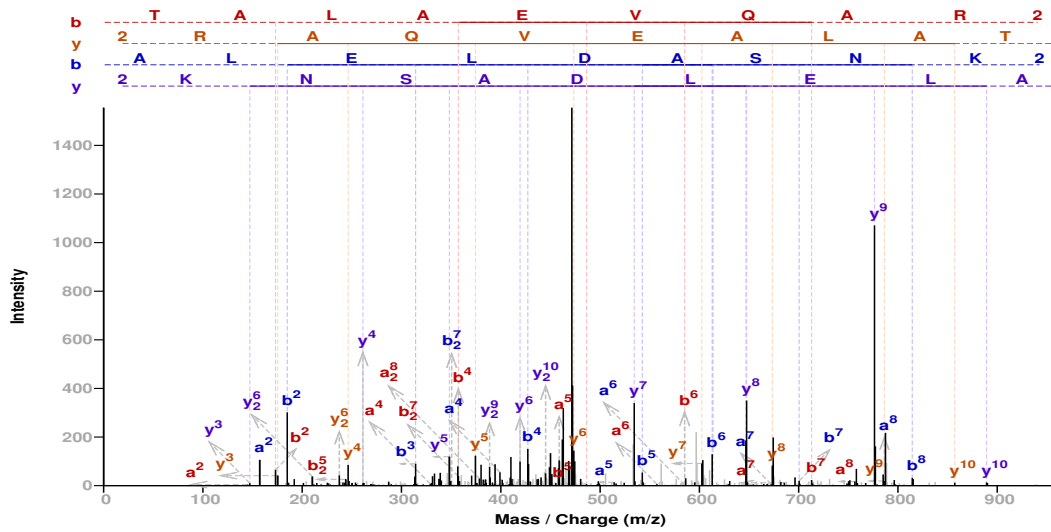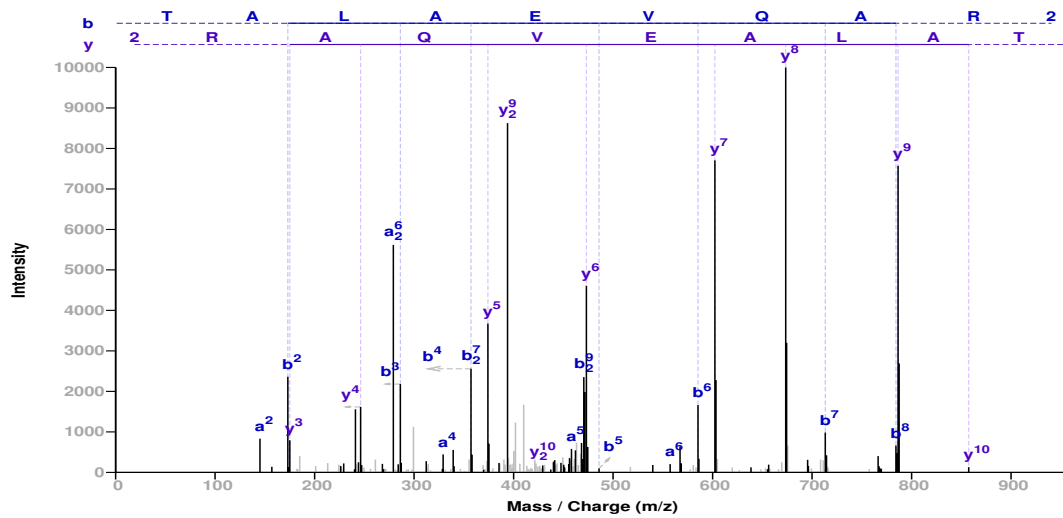

yeast2.Scan\_Number\_2292 Precursor m/z: 424.250 cosine: 0.924  $\alpha$ : 0.273

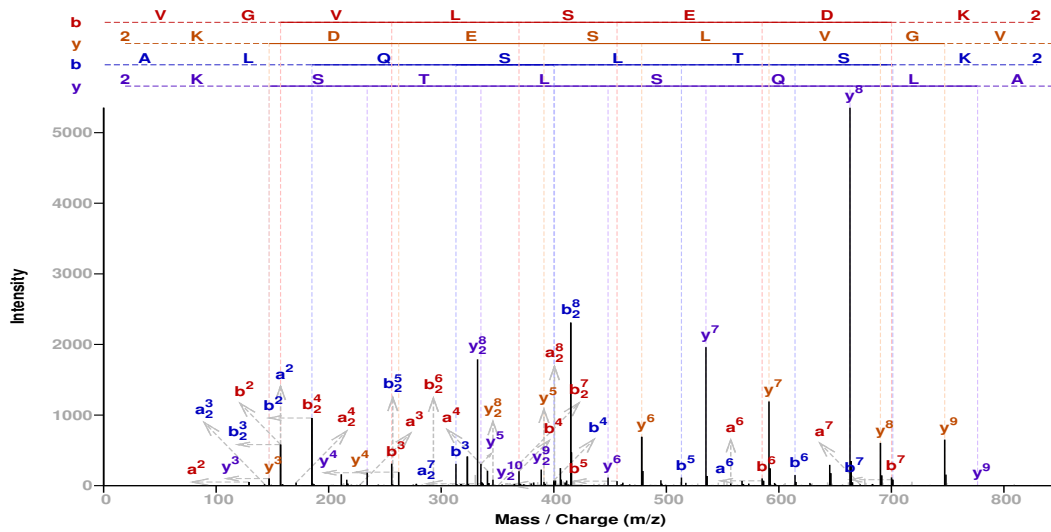



yeast2.Scan\_Number\_2709 Precursor m/z: 413.199 cosine: 0.769  $\alpha$ : 0.254

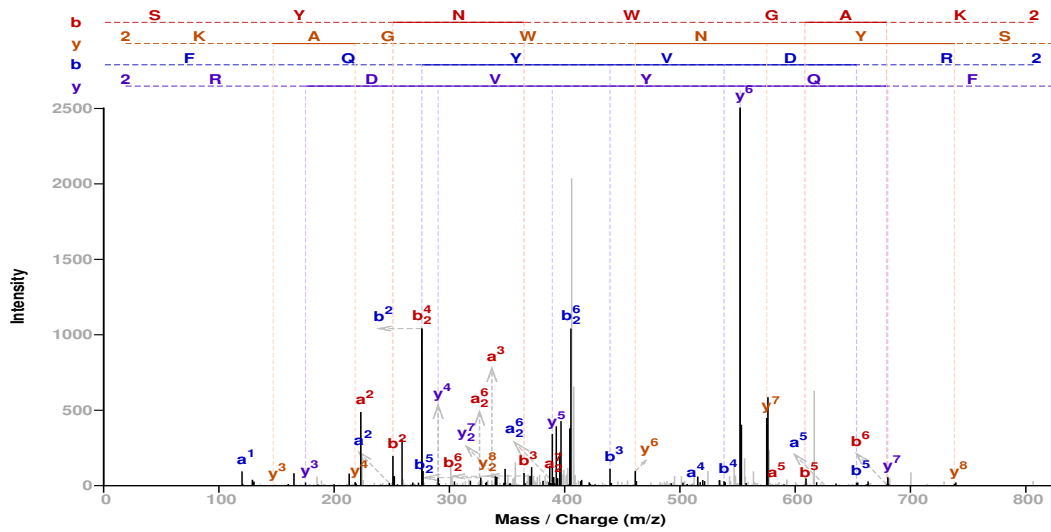

yeast2\_Scan\_Number\_3869 Precursor m/z: 479.255 cosine: 0.869  $\alpha$ : 0.253

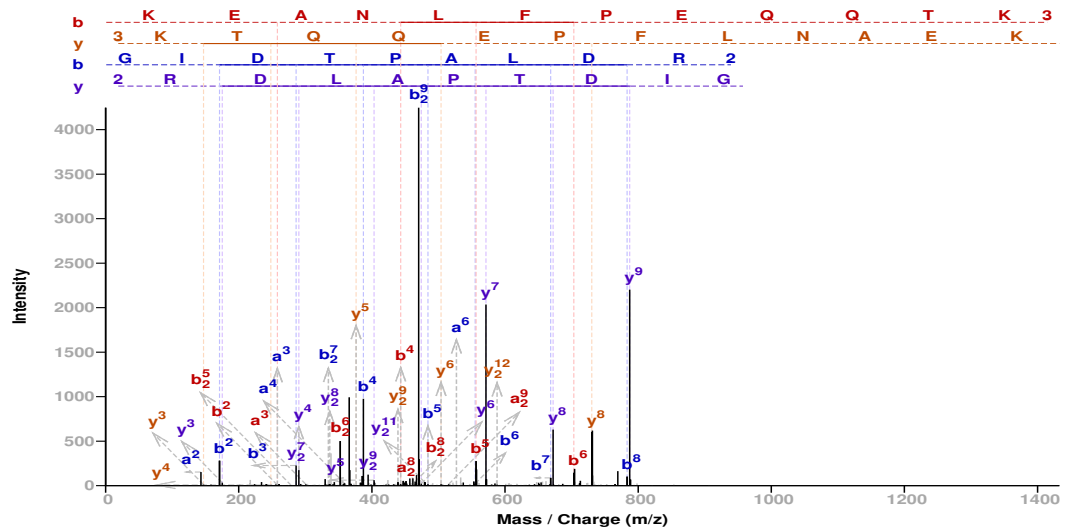

yeast2\_Scan\_Number\_2179 Precursor m/z: 388.221 cosine: 0.908  $\alpha$ : 0.243

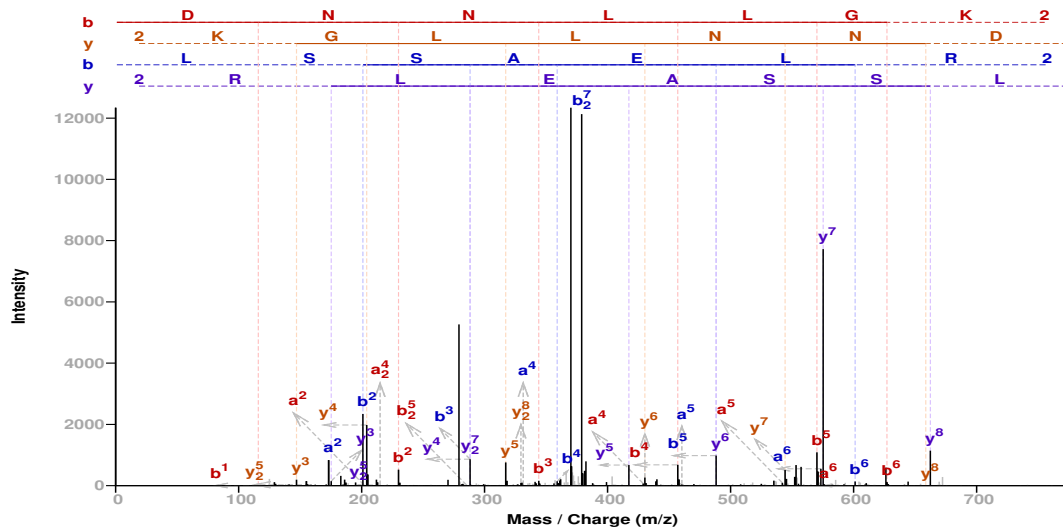

yeast2\_Scan\_Number\_2050 Precursor m/z: 509.260 cosine: 0.808  $\alpha$ : 0.241

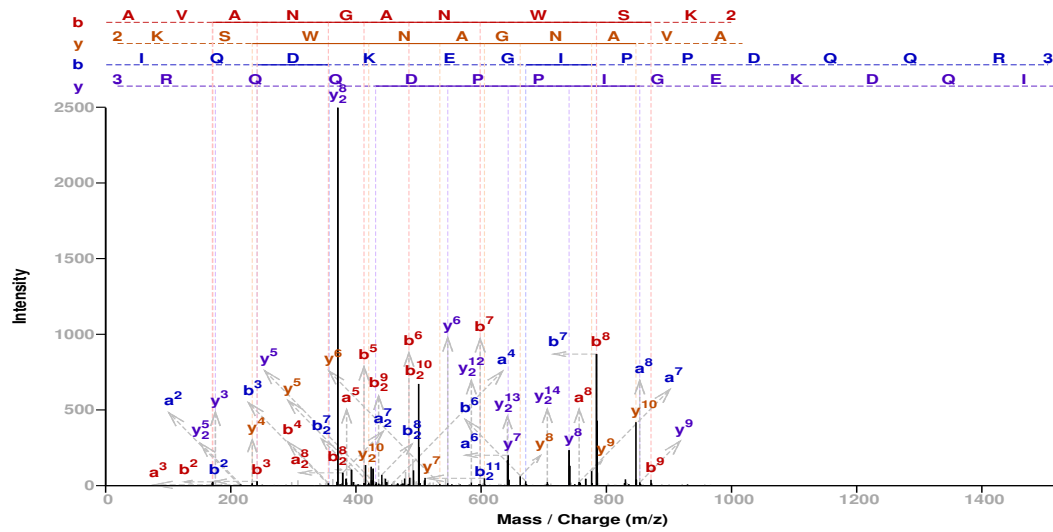

yeast2\_Scan\_Number\_6899 Precursor m/z: 477.307 cosine: 0.776  $\alpha$ : 0.240

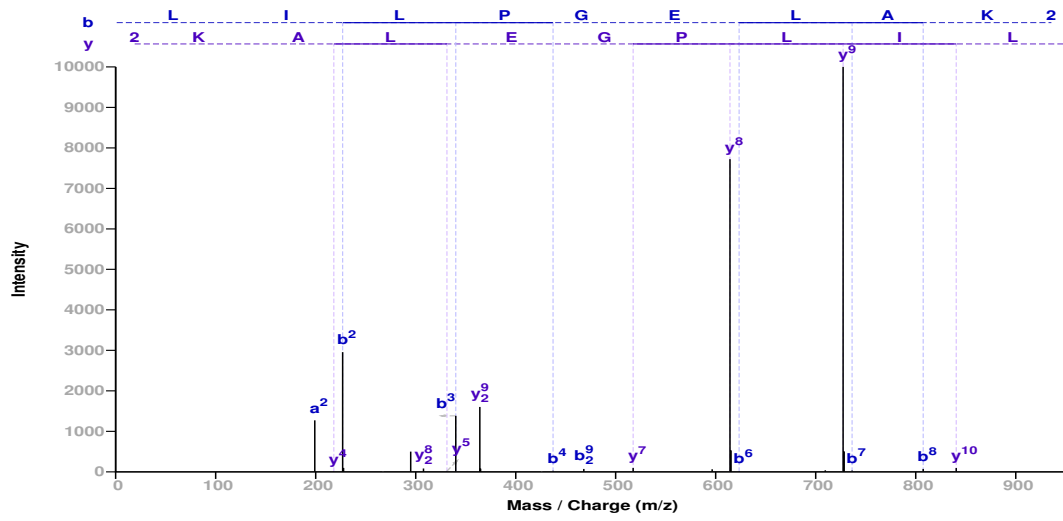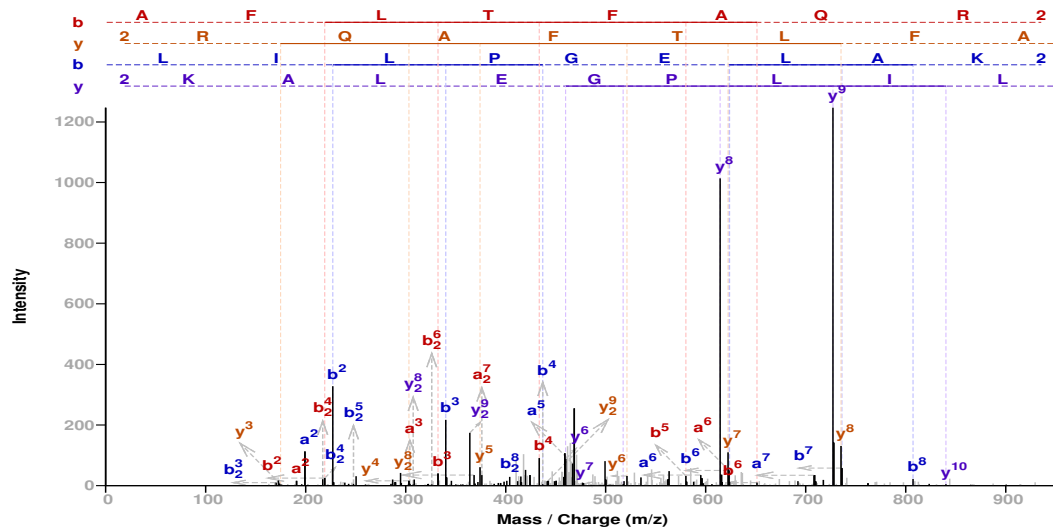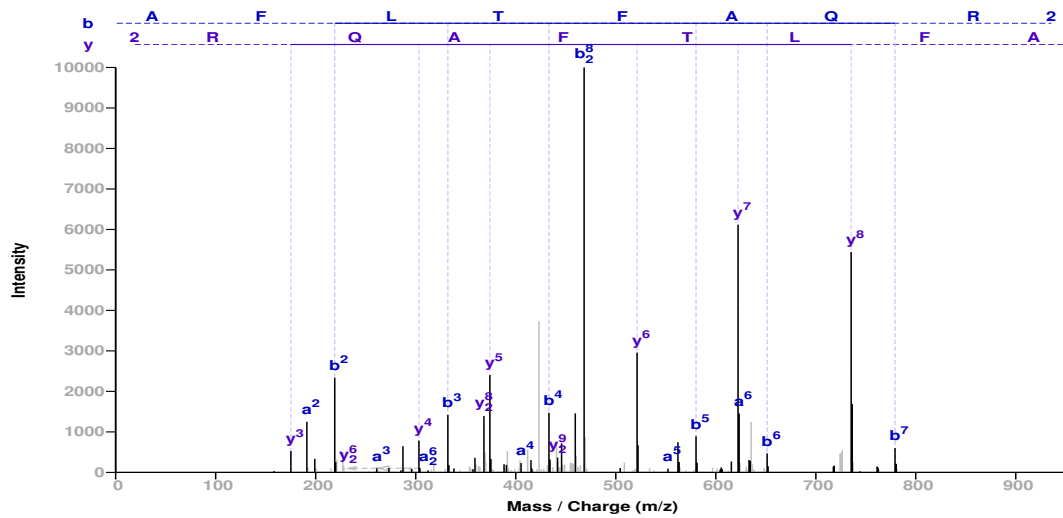



yeast2\_Scan\_Number\_5713 Precursor m/z: 478.296 cosine: 0.853  $\alpha$ : 0.238

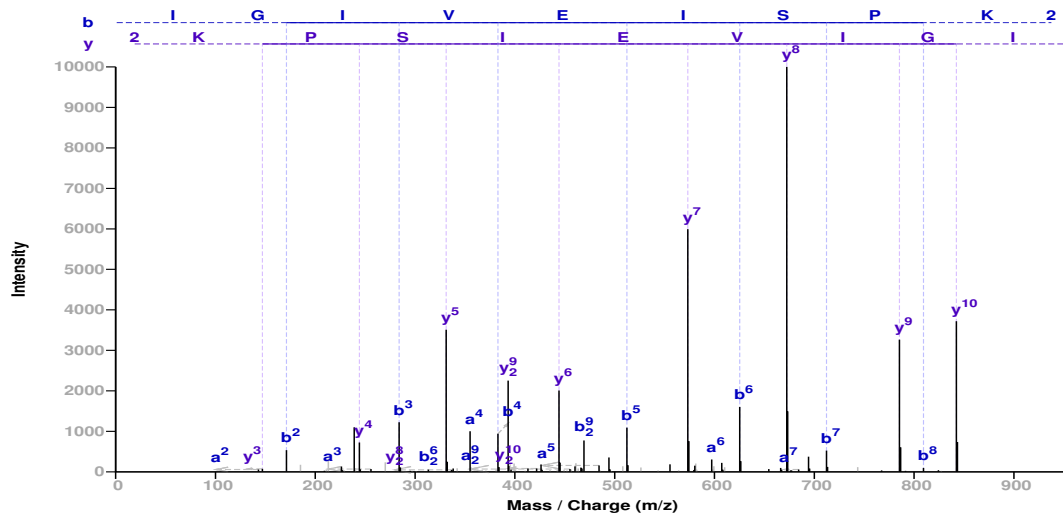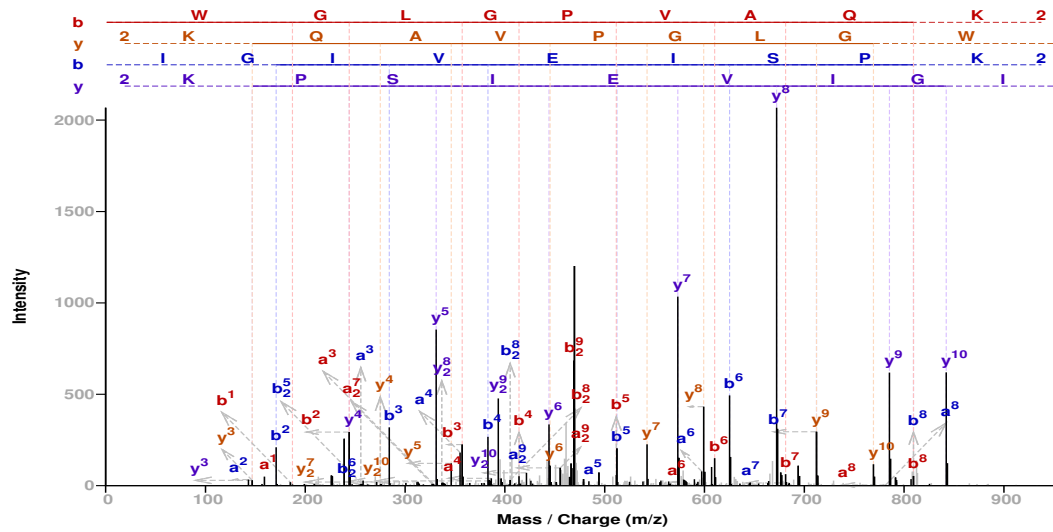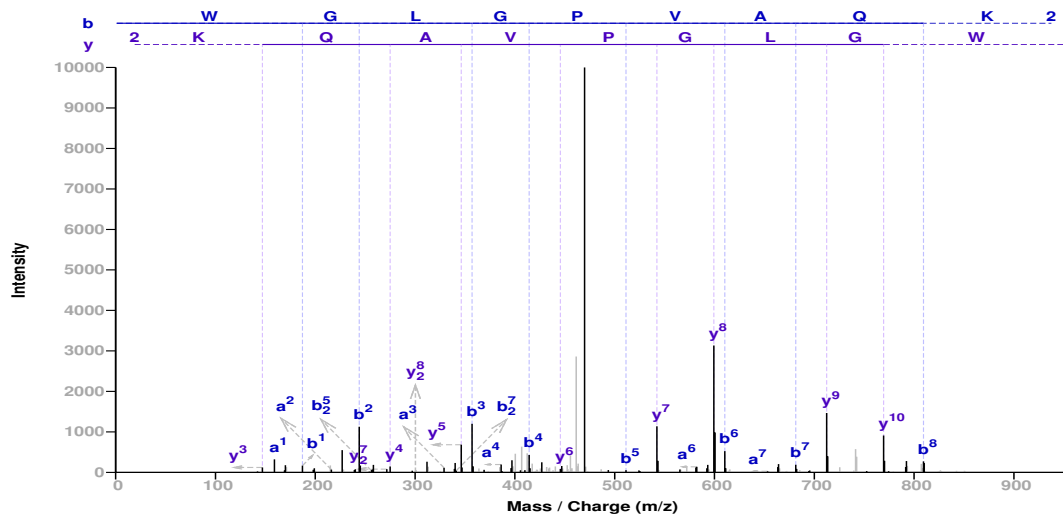

yeast2.Scan\_Number.2117 Precursor m/z: 480.278 cosine: 0.778  $\alpha$ : 0.236

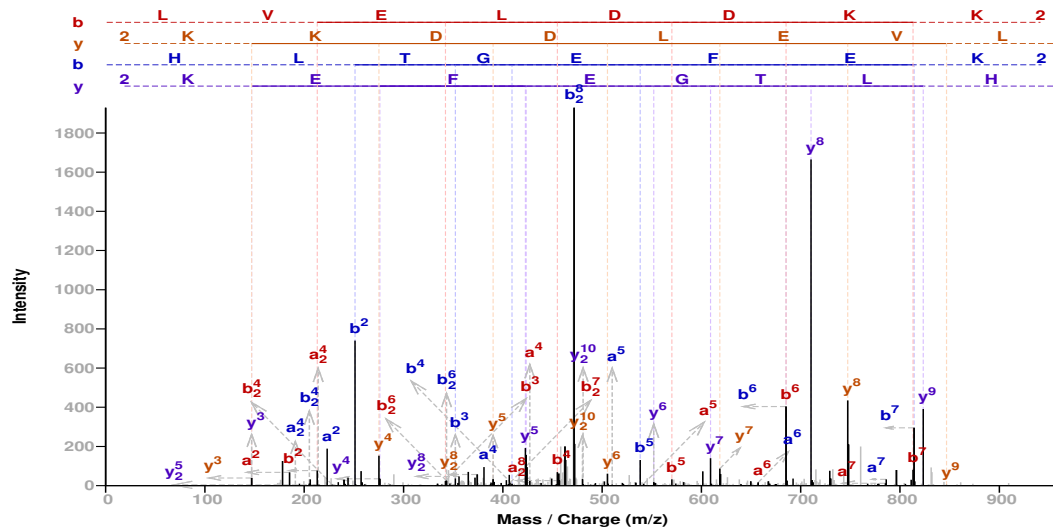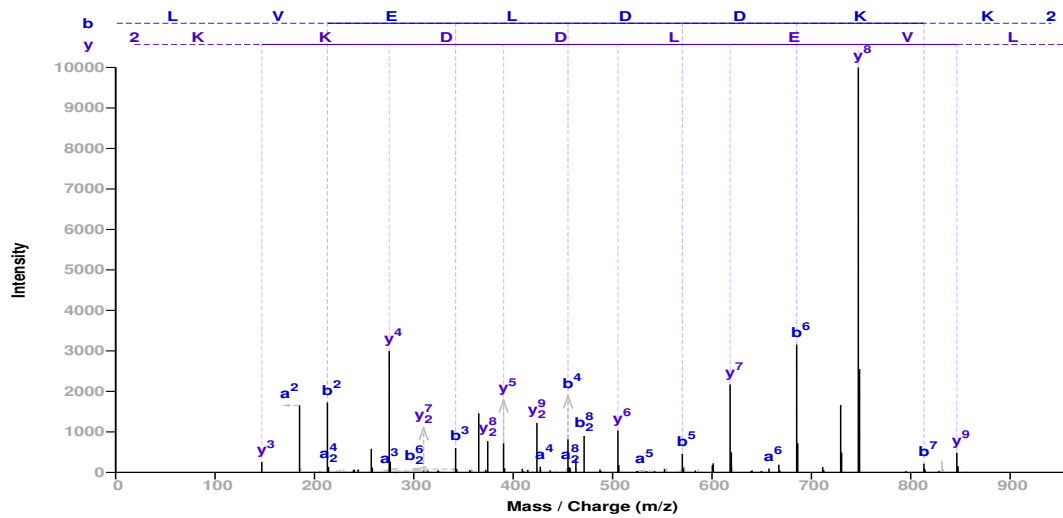



yeast2\_Scan\_Number\_4975 Precursor m/z: 579.327 cosine: 0.740  $\alpha$ : 0.235

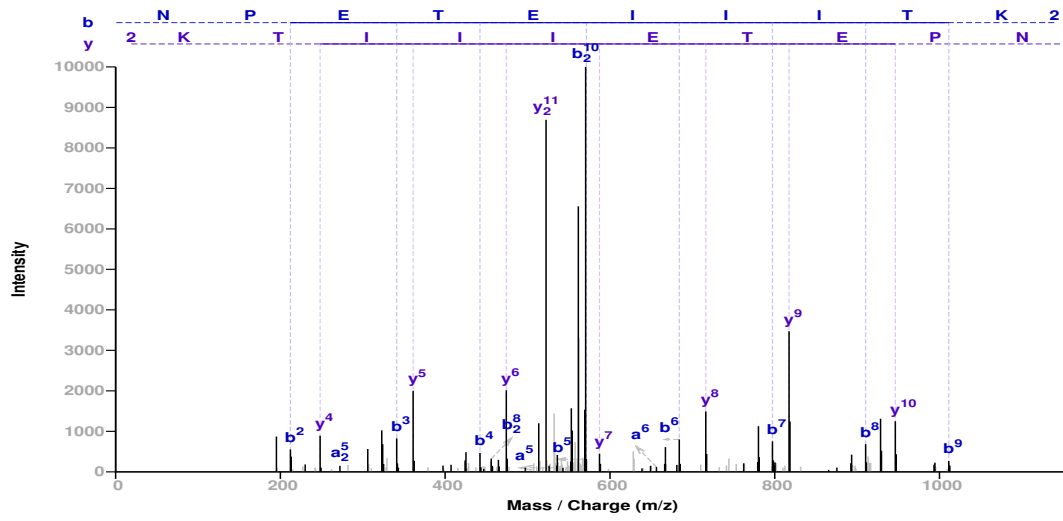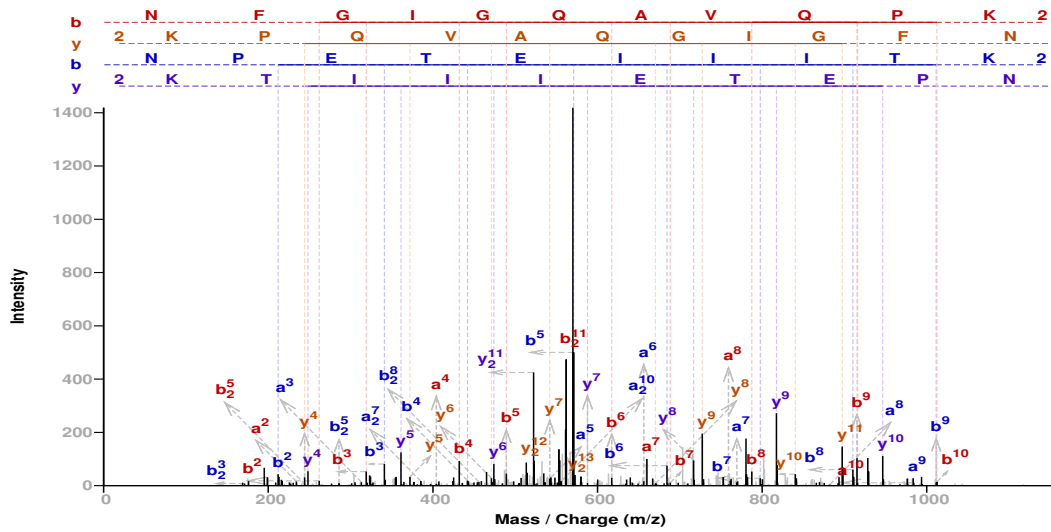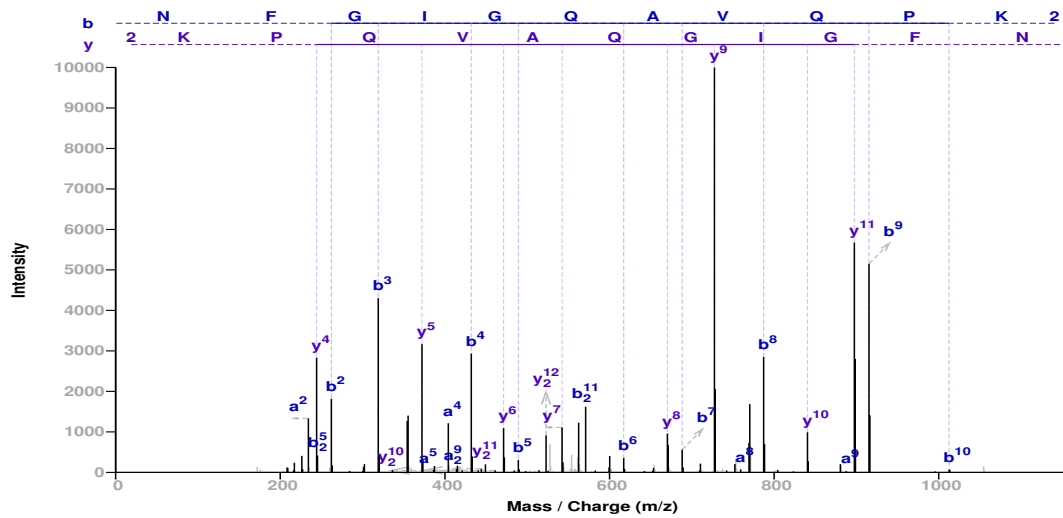

yeast2.Scan\_Number\_4710 Precursor m/z: 364.211 cosine: 0.868  $\alpha$ : 0.234

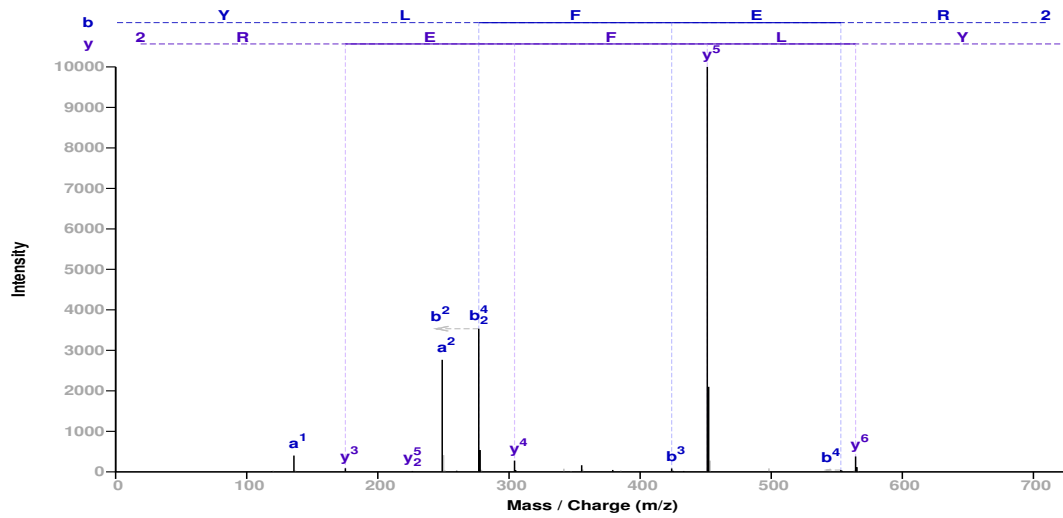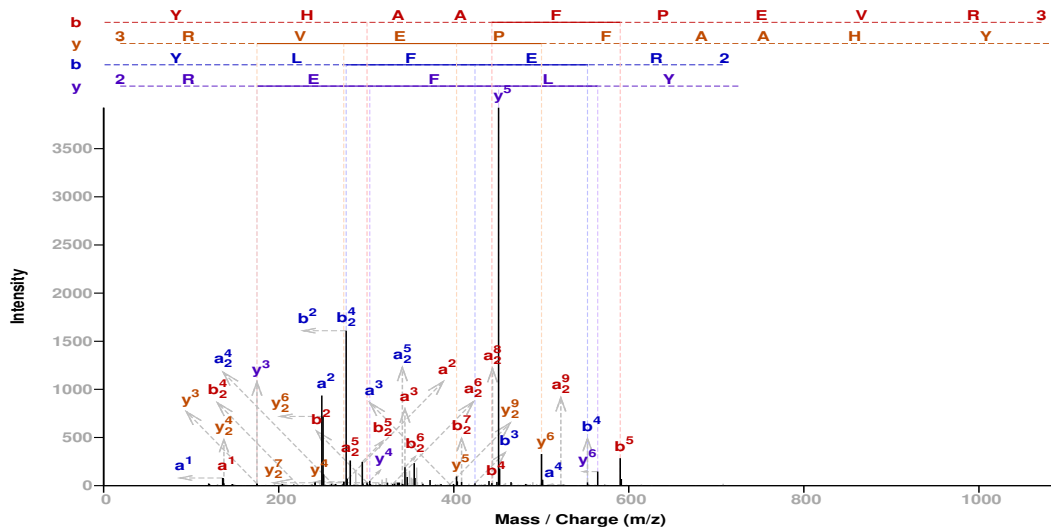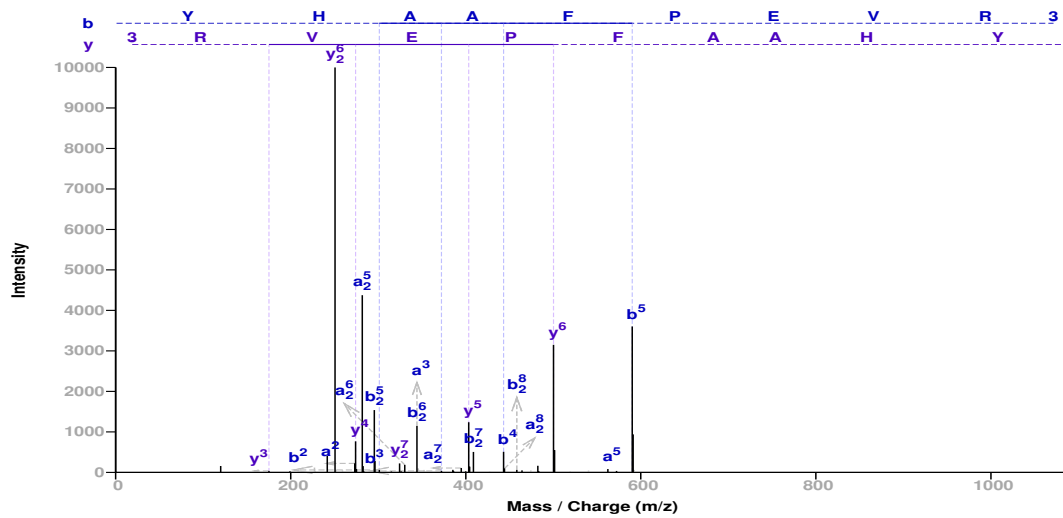

yeast2\_Scan\_Number\_3950 Precursor m/z: 473.271 cosine: 0.838  $\alpha$ : 0.234

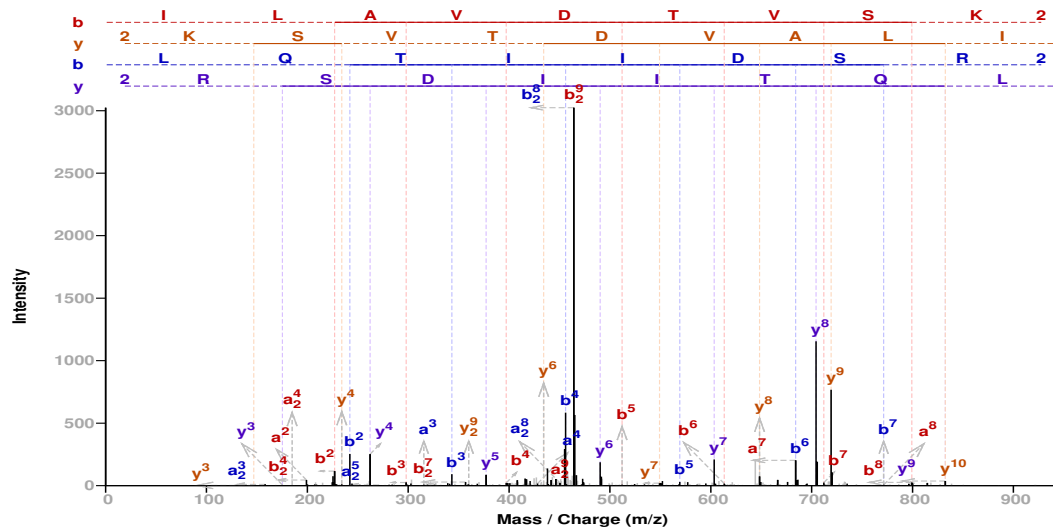

yeast2\_Scan\_Number\_982 Precursor m/z: 463.279 cosine: 0.801  $\alpha$ : 0.233

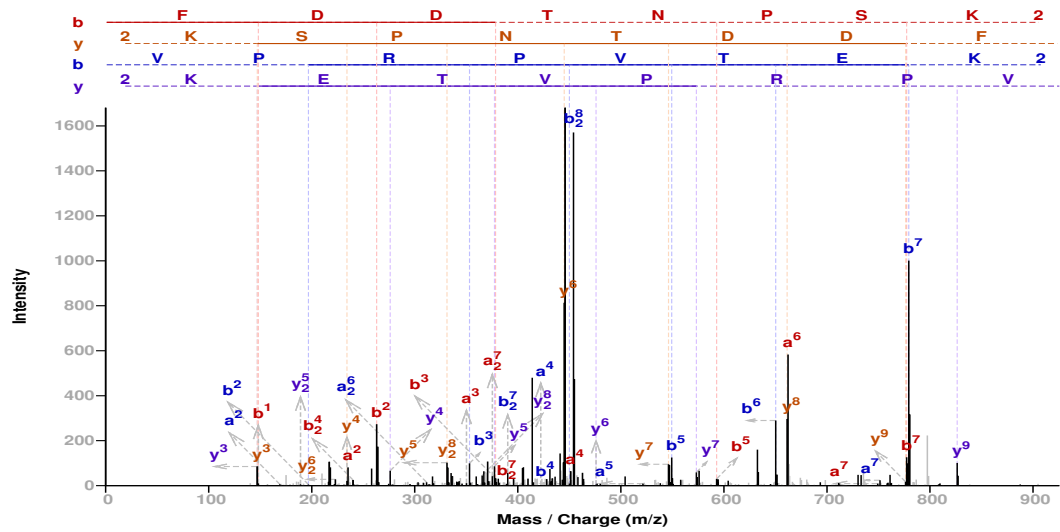

yeast2\_Scan\_Number\_3276 Precursor m/z: 570.263 cosine: 0.828  $\alpha$ : 0.230

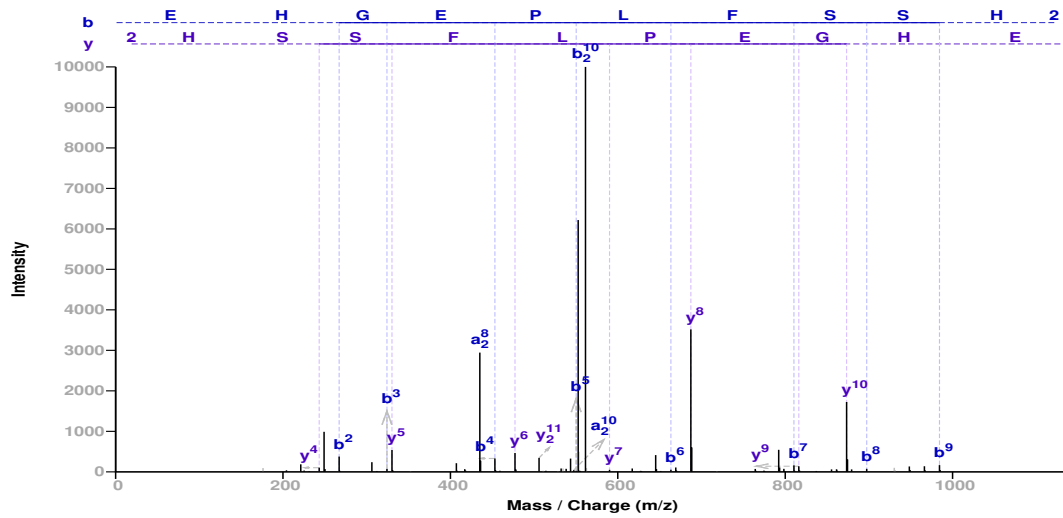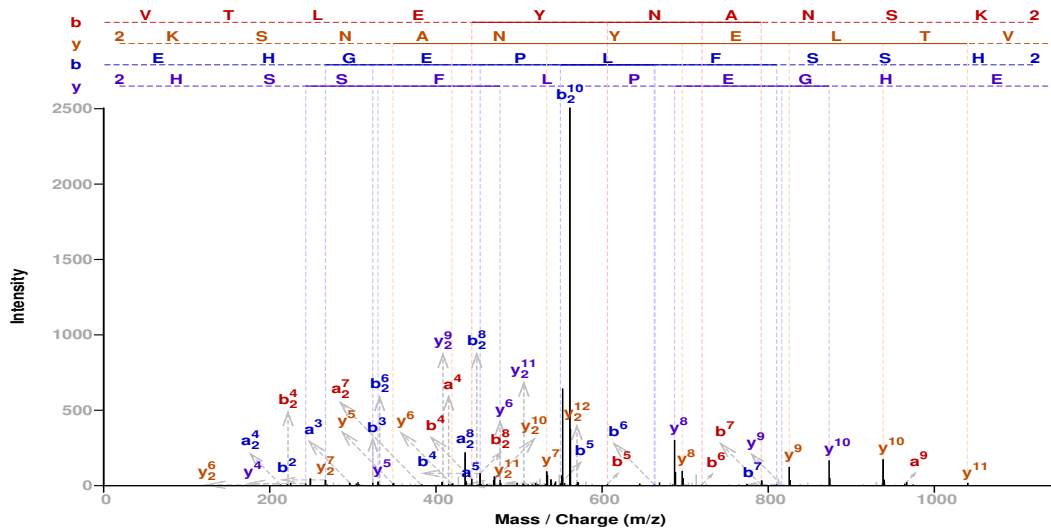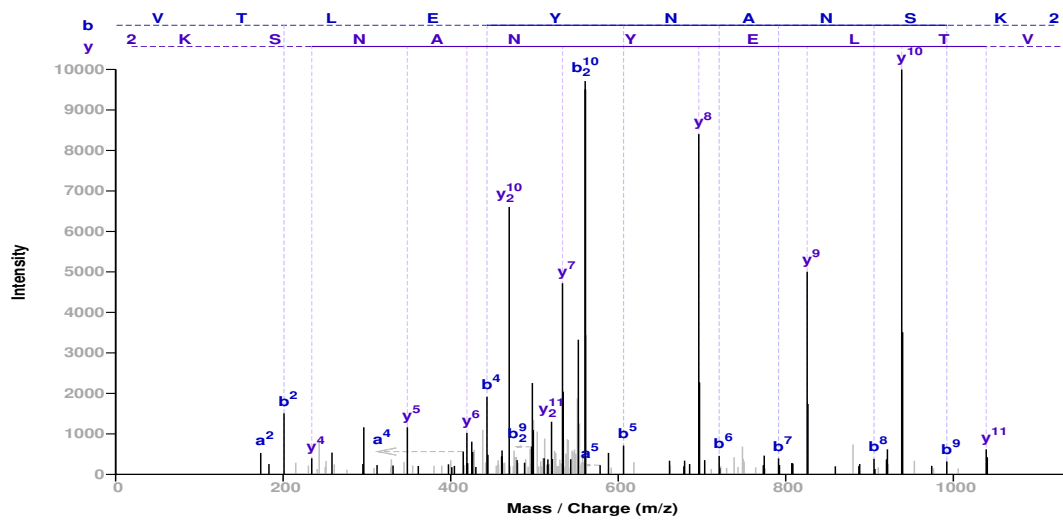



yeast2\_Scan\_Number\_2742 Precursor m/z: 529.312 cosine: 0.778  $\alpha$ : 0.228

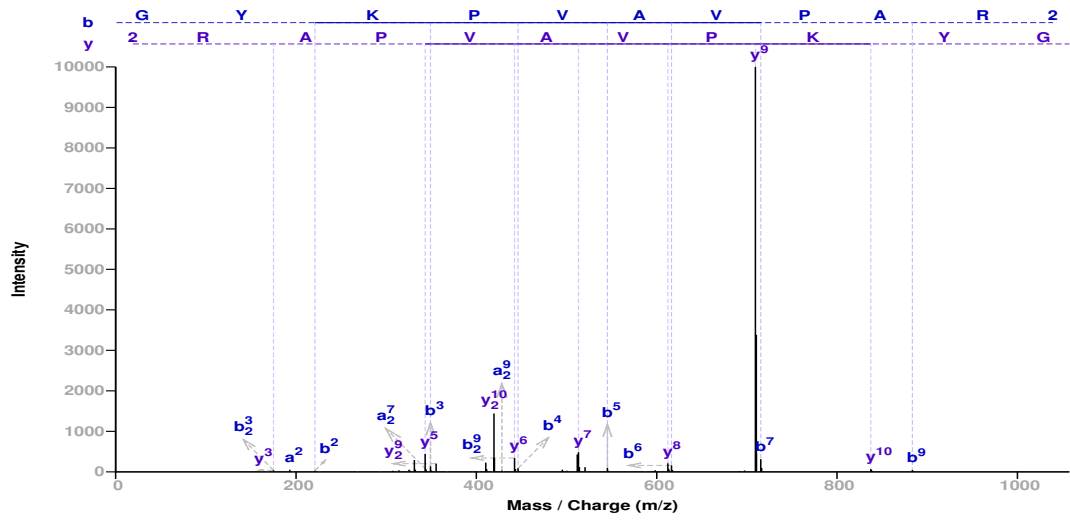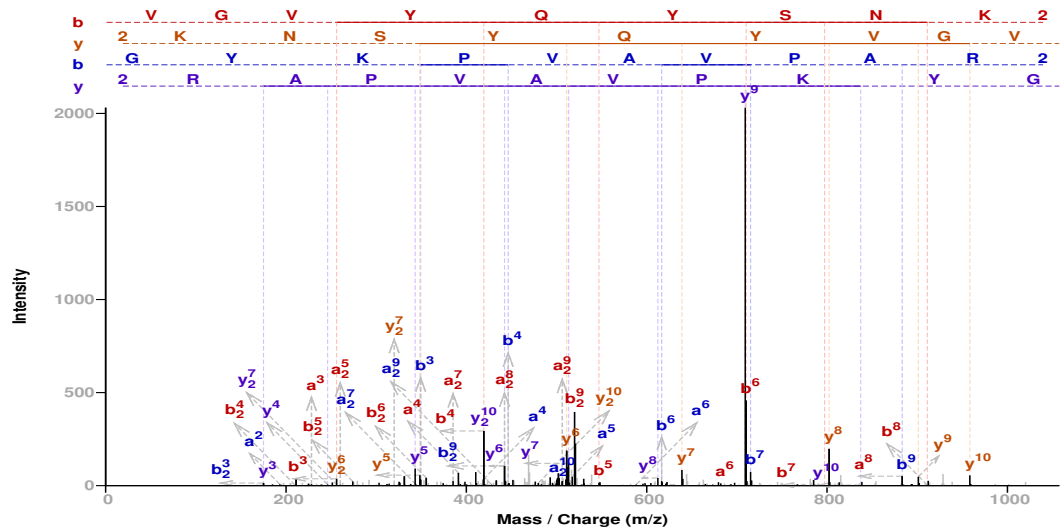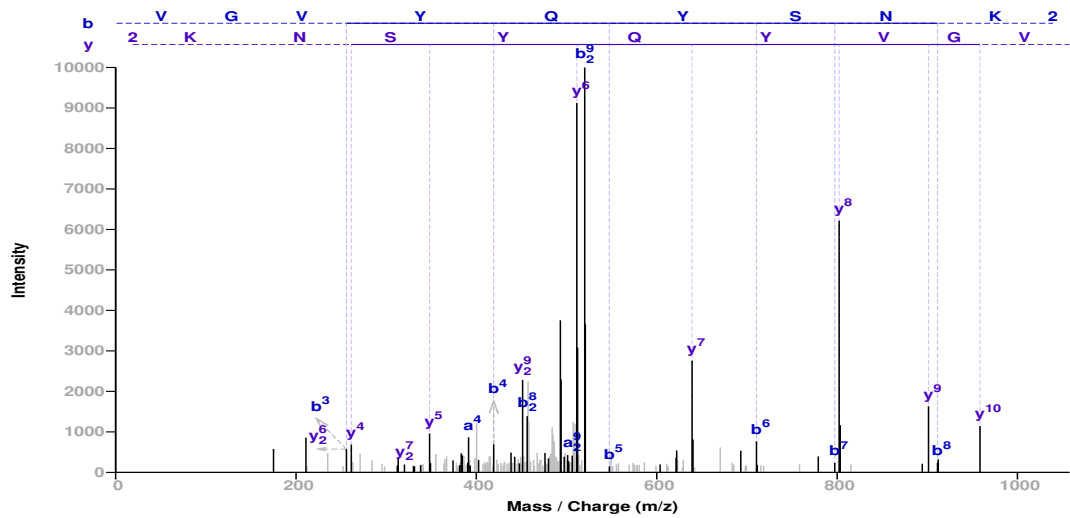

yeast2\_Scan\_Number\_3018 Precursor m/z: 416.234 cosine: 0.774  $\alpha$ : 0.226

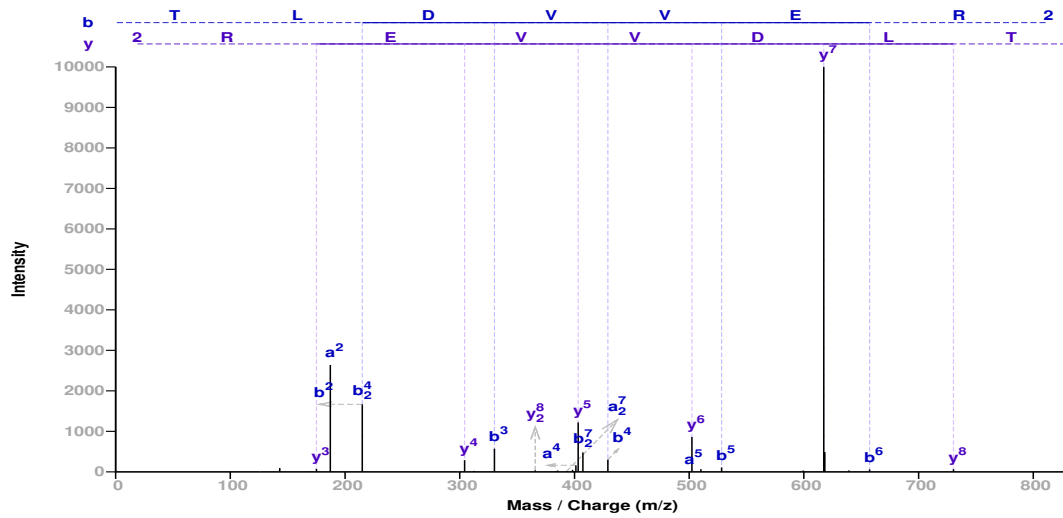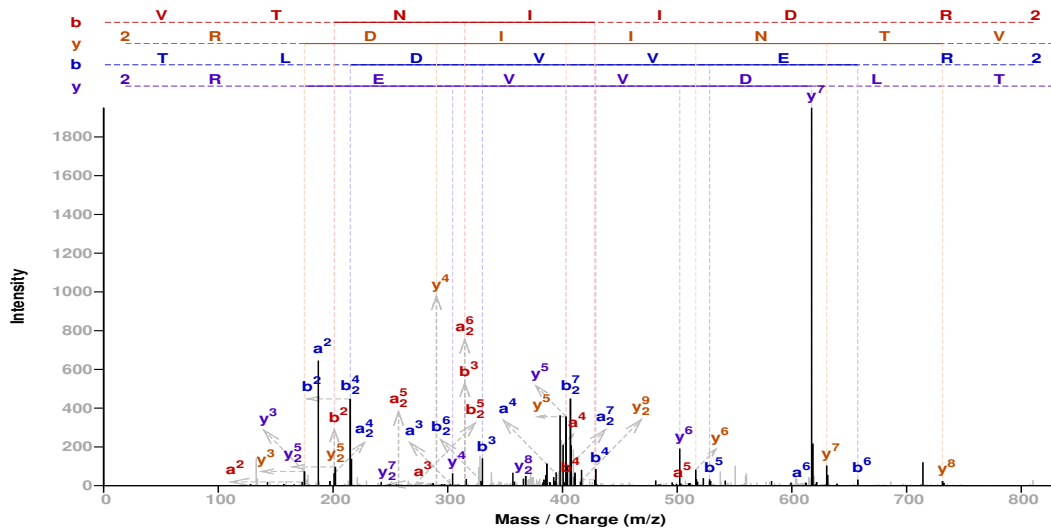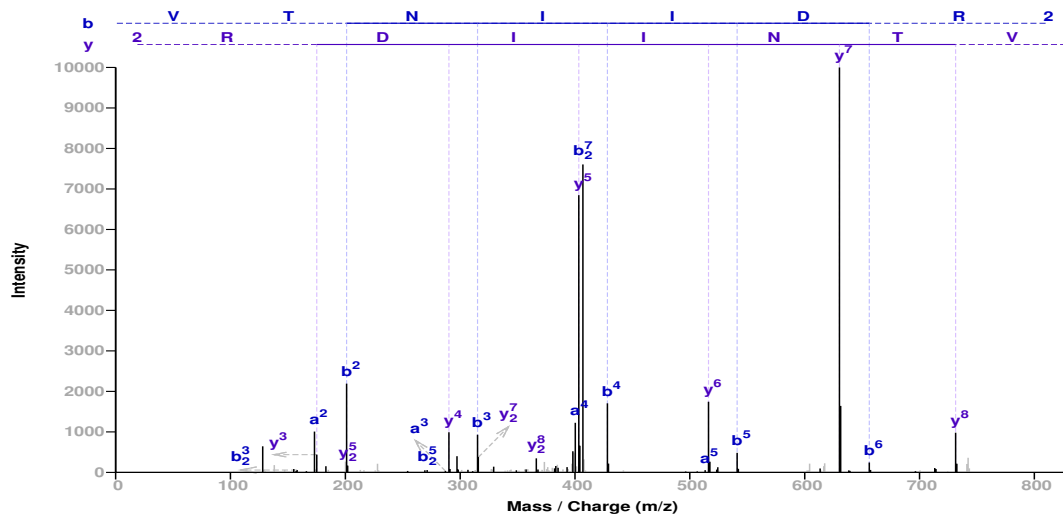

yeast2\_Scan\_Number\_6557 Precursor m/z: 574.325 cosine: 0.827  $\alpha$ : 0.225

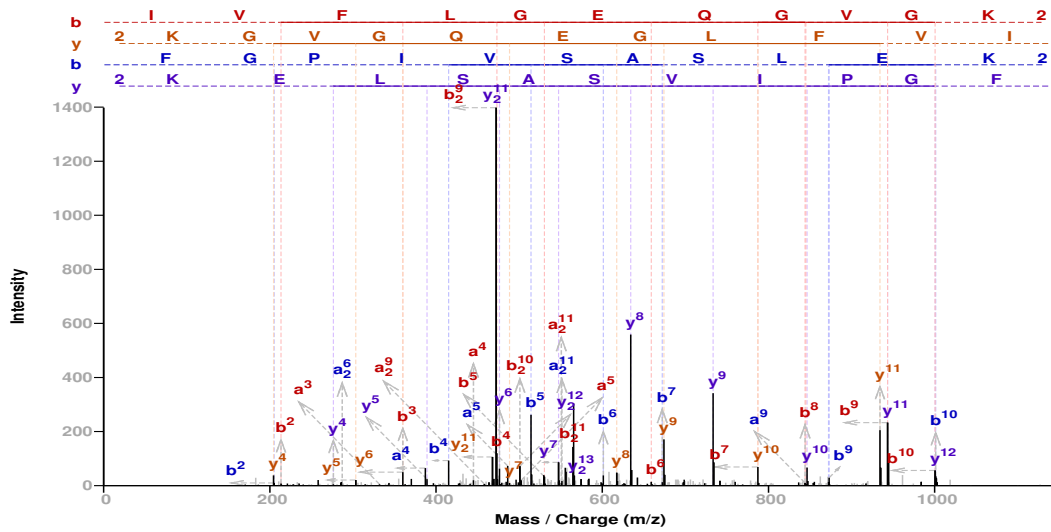



yeast2\_Scan\_Number\_2766 Precursor m/z: 396.718 cosine: 0.894  $\alpha$ : 0.221

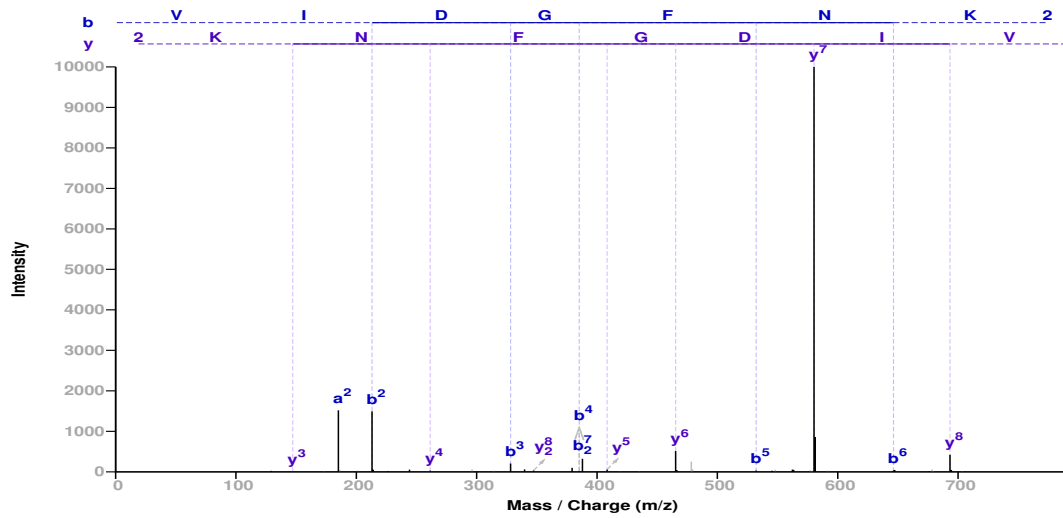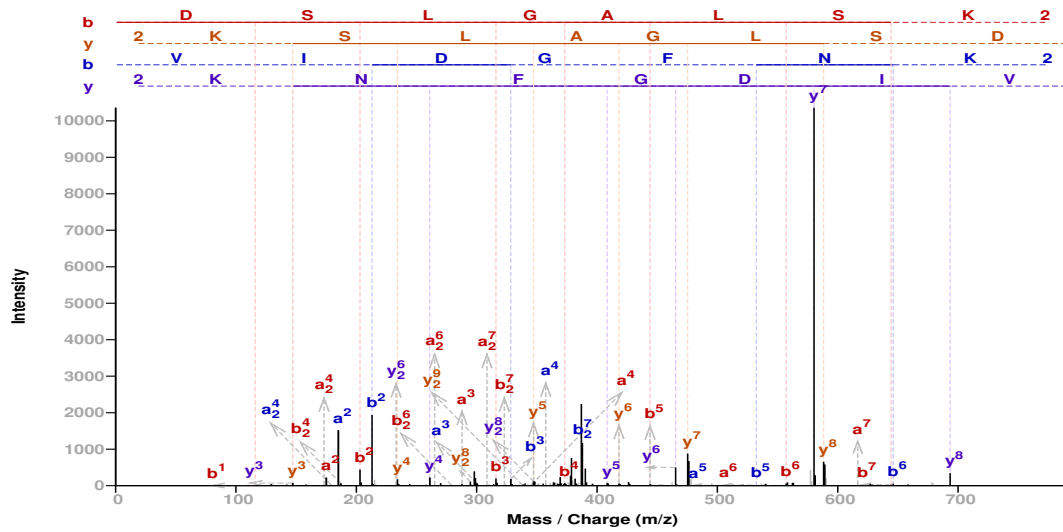

yeast2\_Scan\_Number\_3079 Precursor m/z: 447.278 cosine: 0.898  $\alpha$ : 0.212

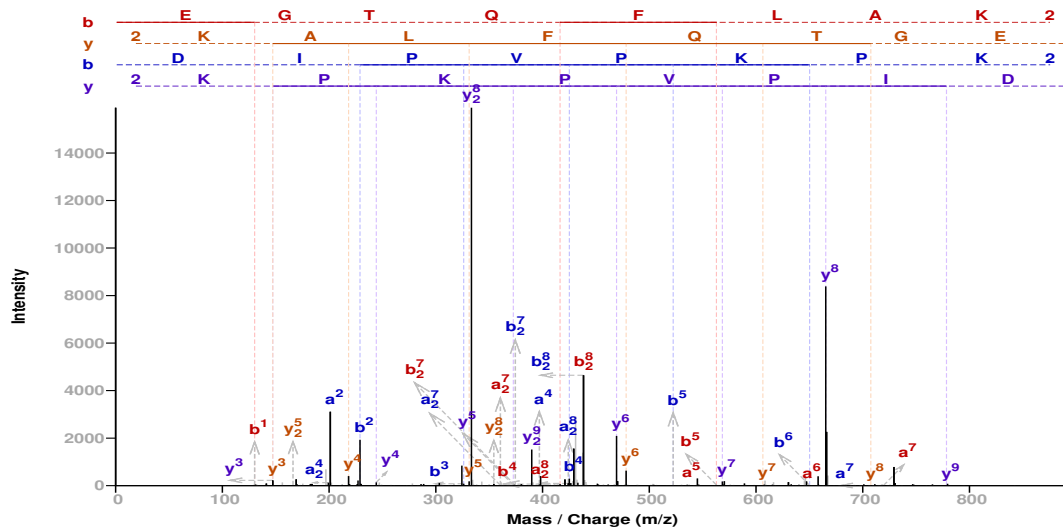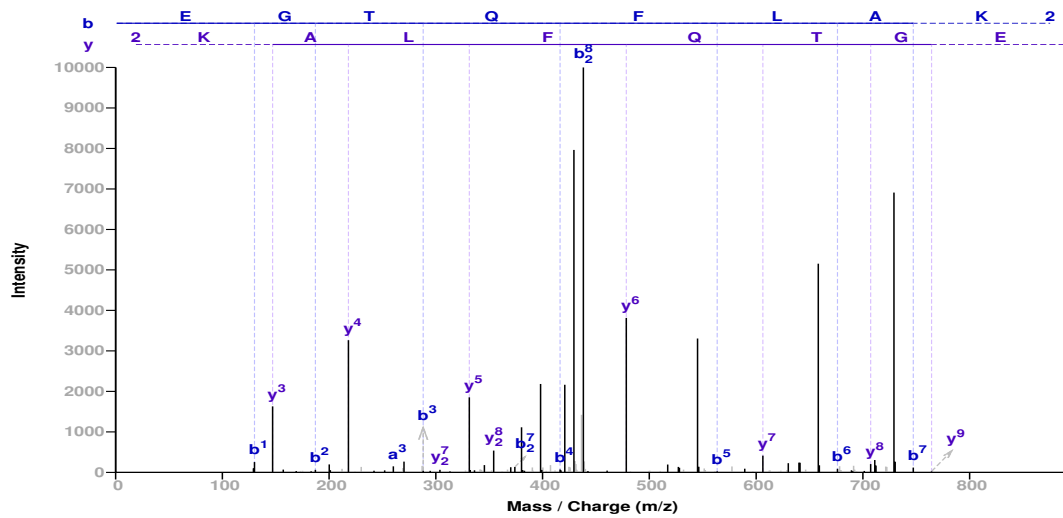

yeast2\_Scan\_Number\_7280 Precursor m/z: 617.357 cosine: 0.758  $\alpha$ : 0.211

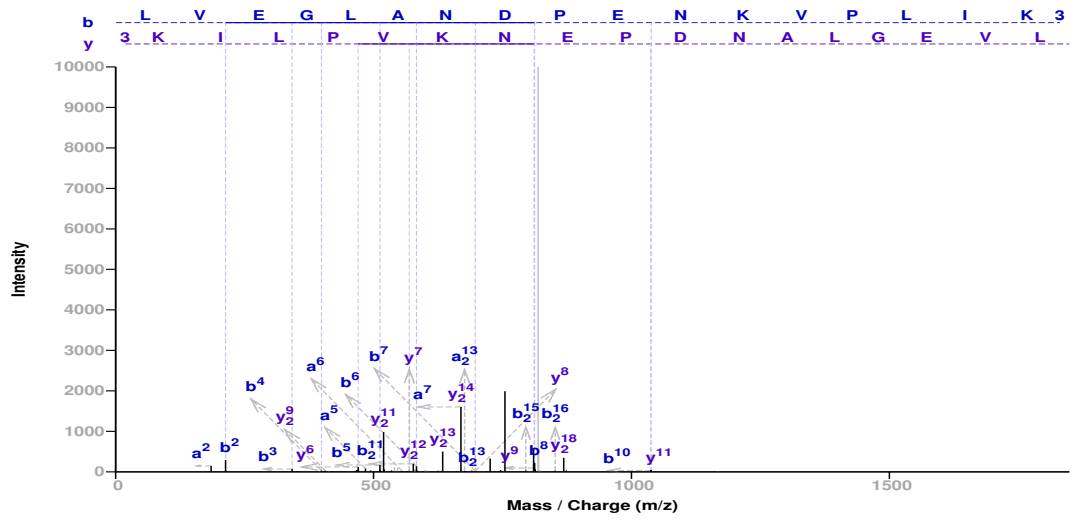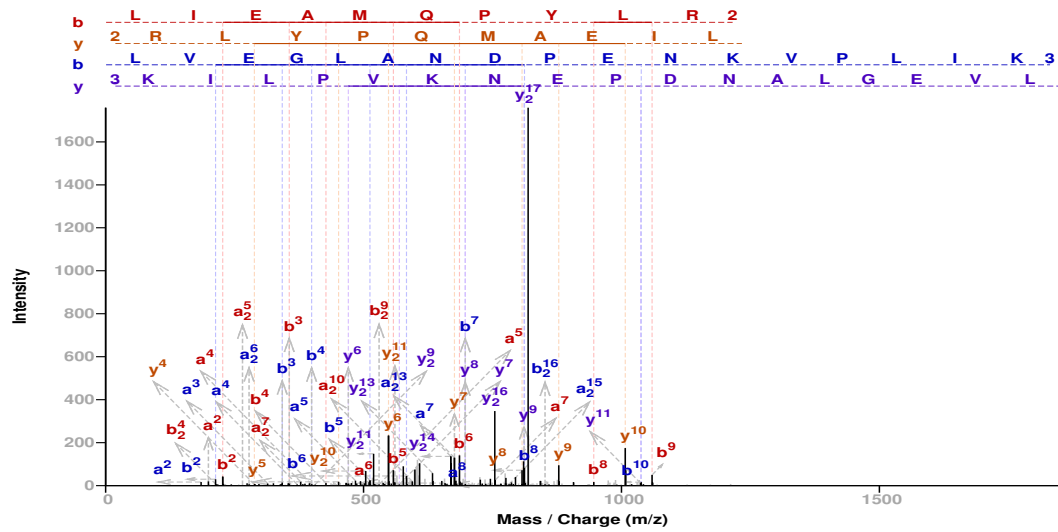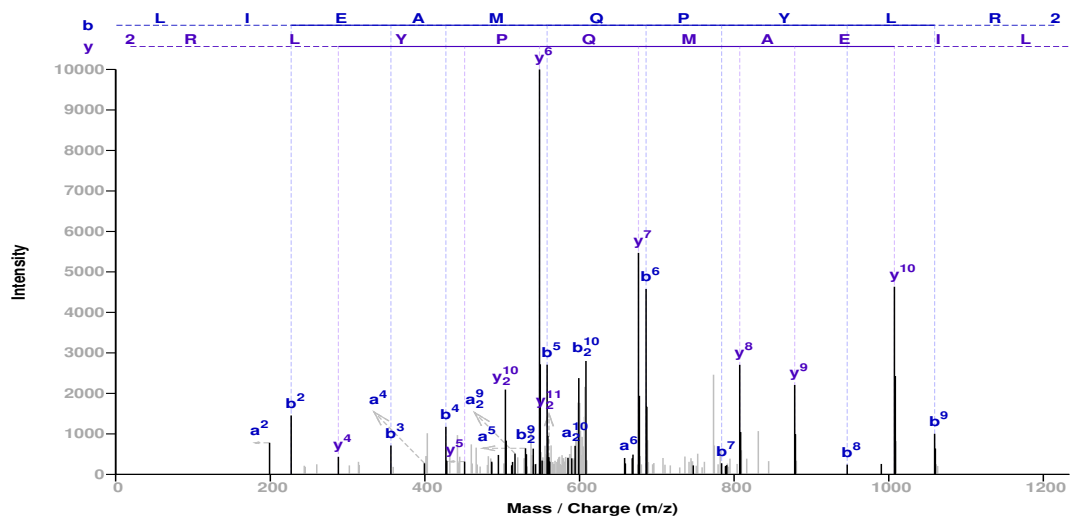

yeast2\_Scan\_Number\_6800 Precursor m/z: 449.273 cosine: 0.861  $\alpha$ : 0.207

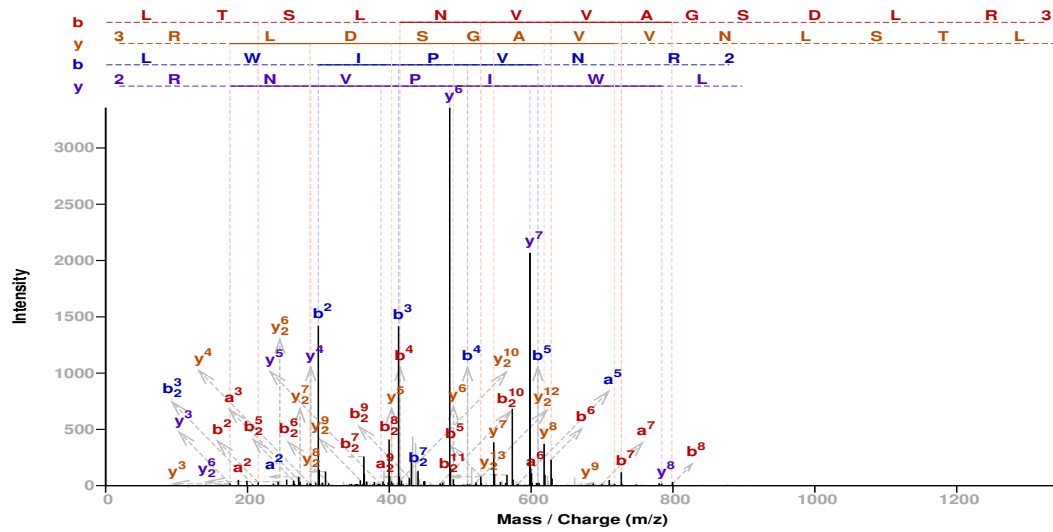



yeast2\_Scan\_Number\_5595 Precursor m/z: 569.295 cosine: 0.785  $\alpha$ : 0.204

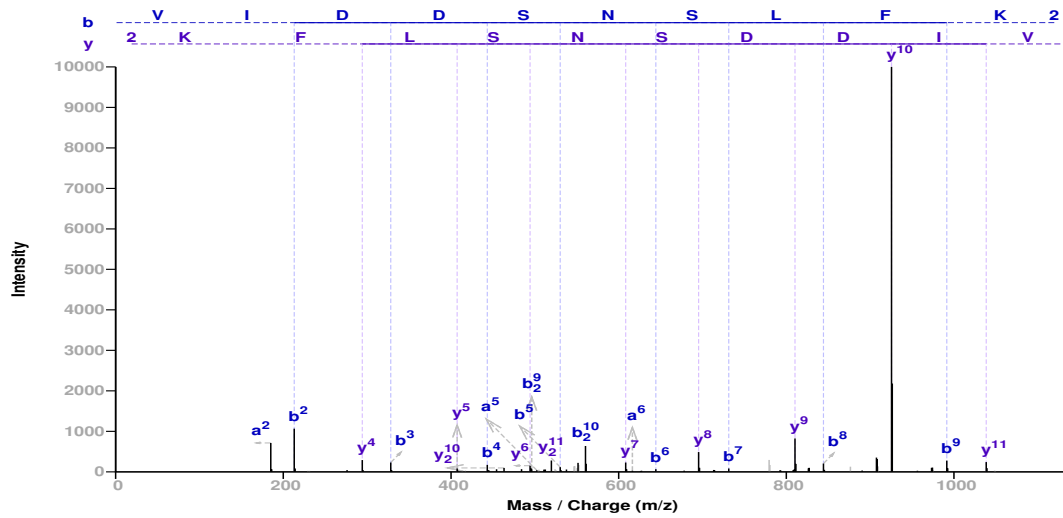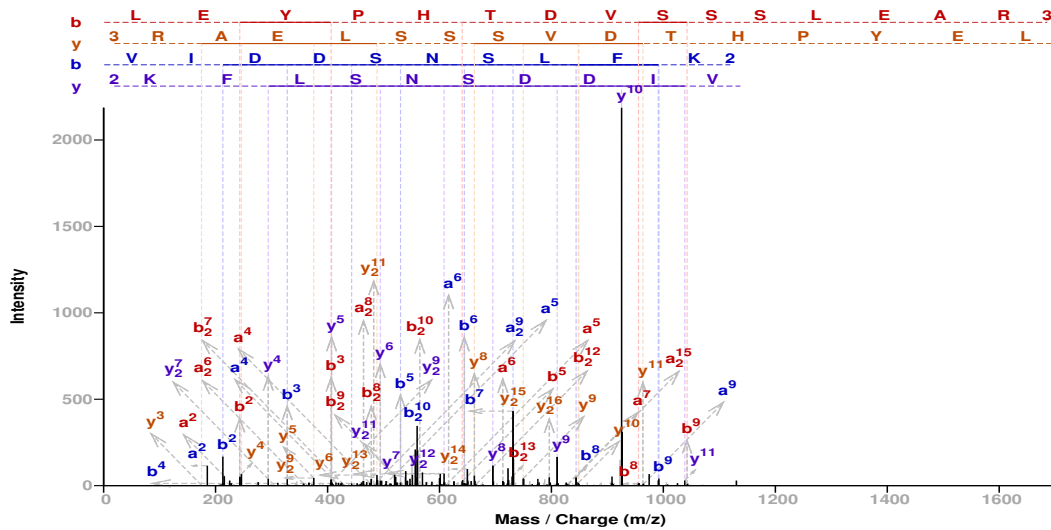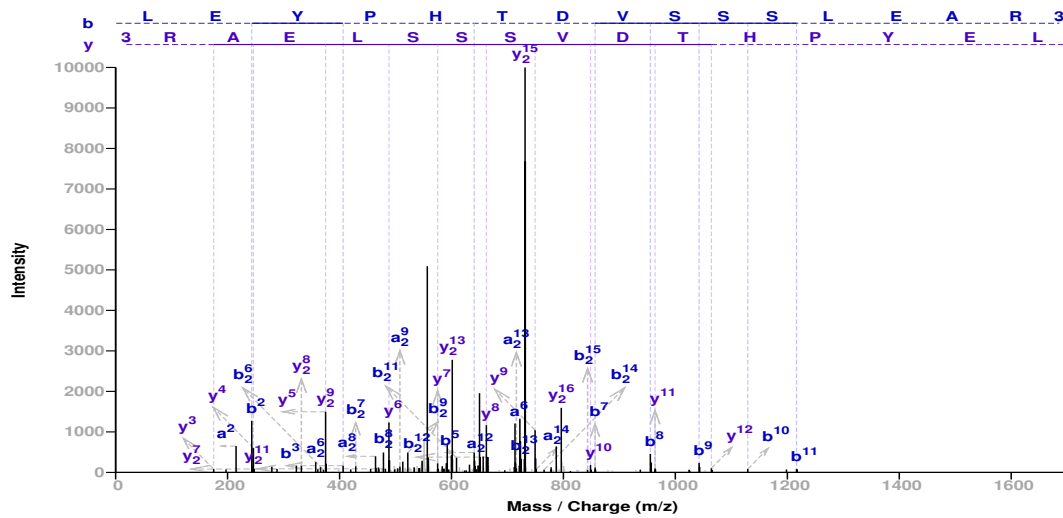

yeast2\_Scan\_Number\_7659 Precursor m/z: 600.343 cosine: 0.828  $\alpha$ : 0.203

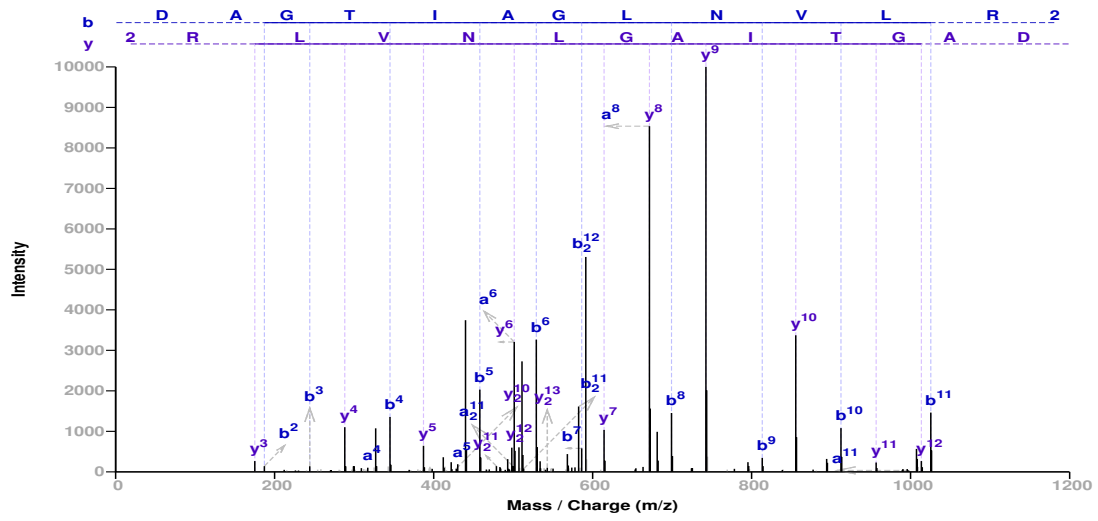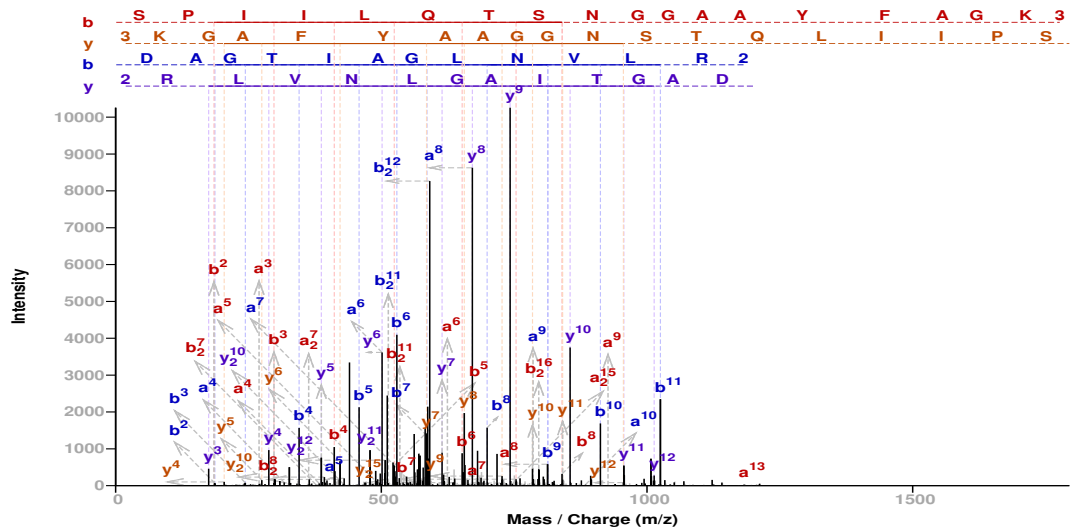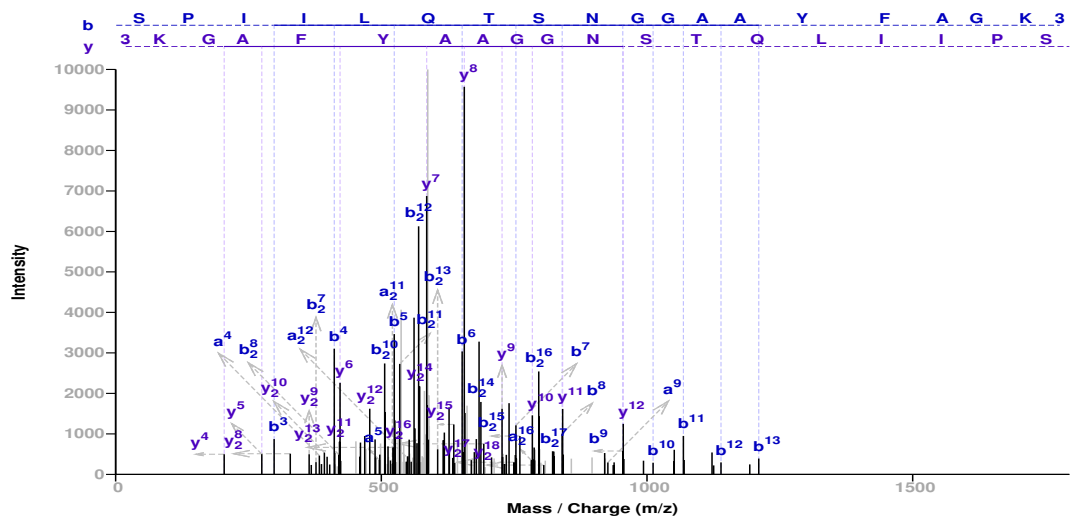

yeast2\_Scan\_Number\_4394 Precursor m/z: 415.249 cosine: 0.771  $\alpha$ : 0.196

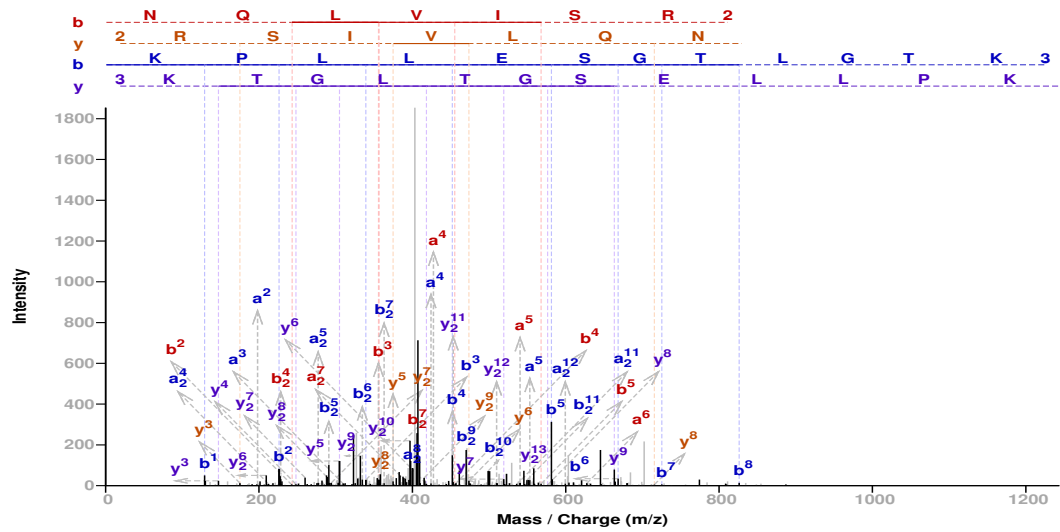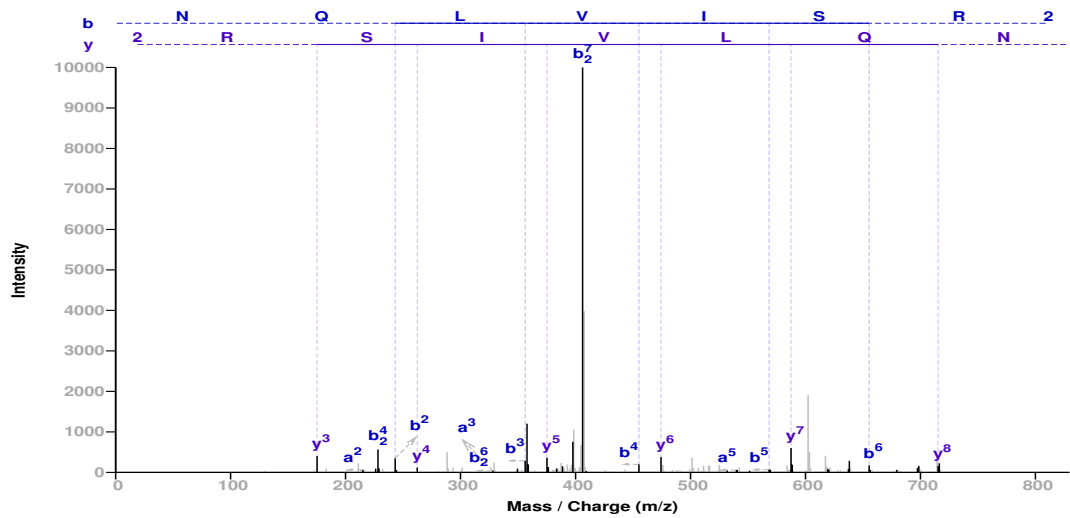

yeast2\_Scan\_Number\_5131 Precursor m/z: 835.397 cosine: 0.779  $\alpha$ : 0.195

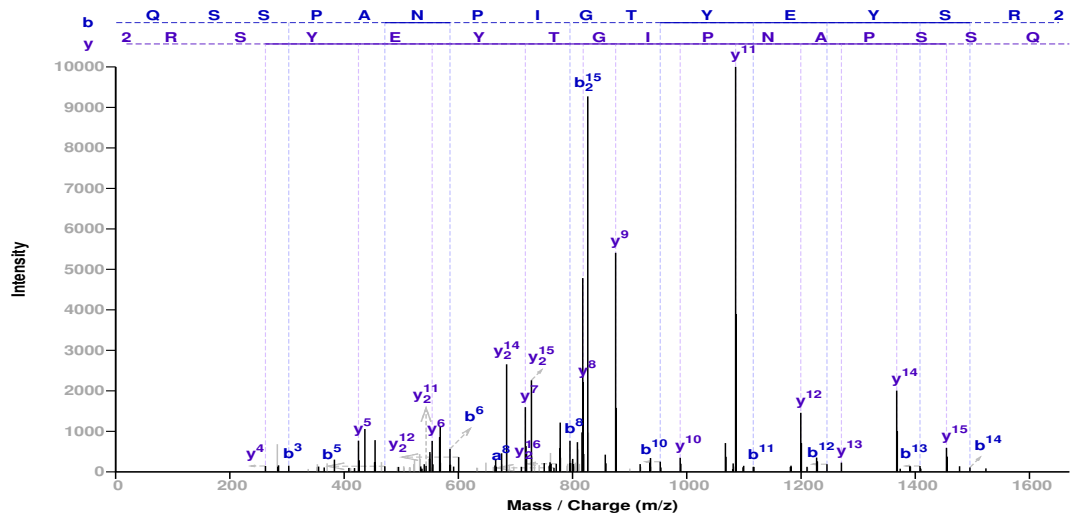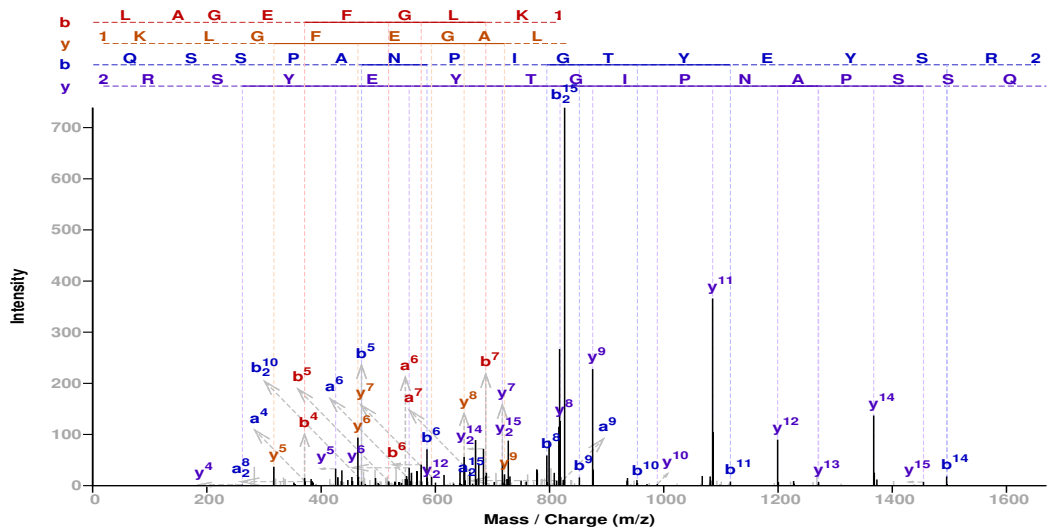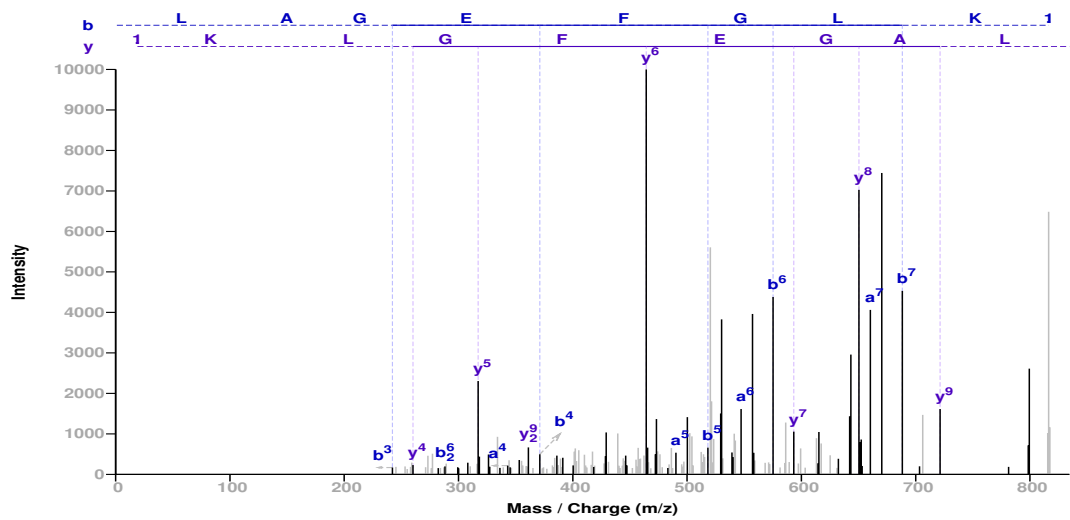

yeast2.Scan\_Number\_3964 Precursor m/z: 343.715 cosine: 0.812  $\alpha$ : 0.190

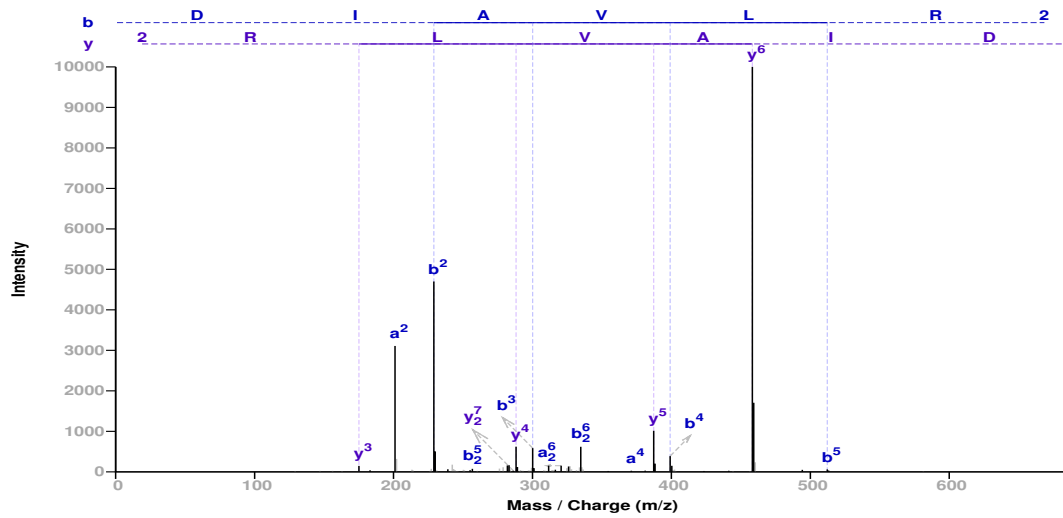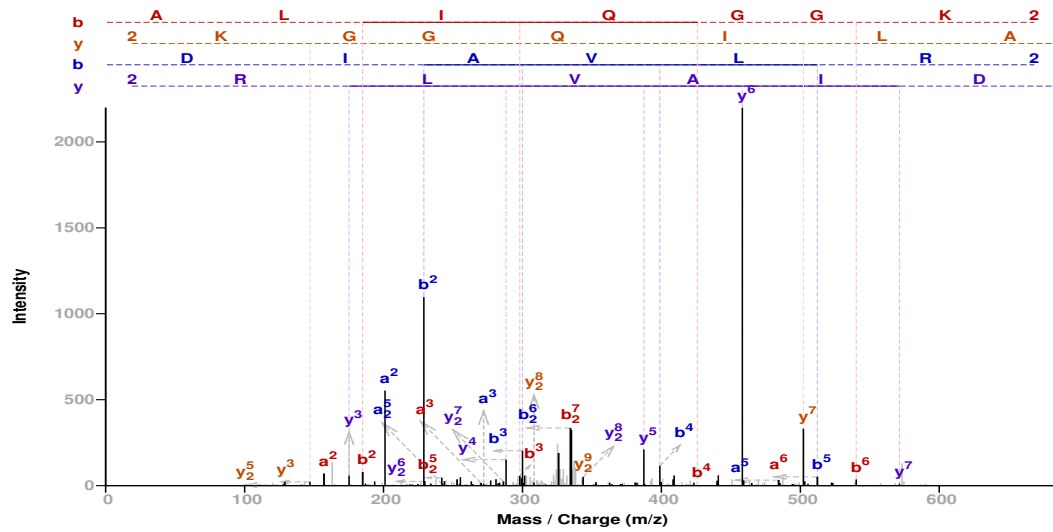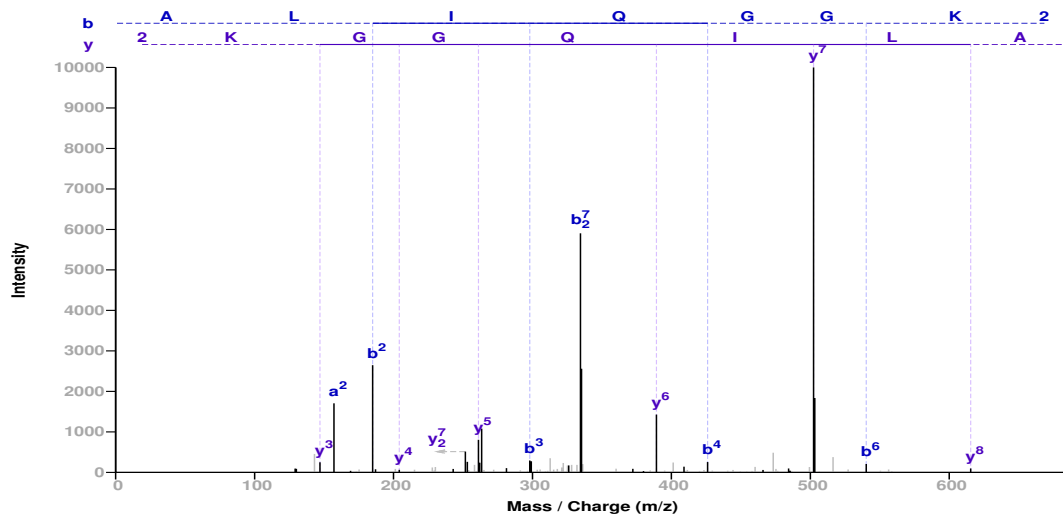



yeast2.Scan\_Number\_2532 Precursor m/z: 490.782 cosine: 0.797  $\alpha$ : 0.179

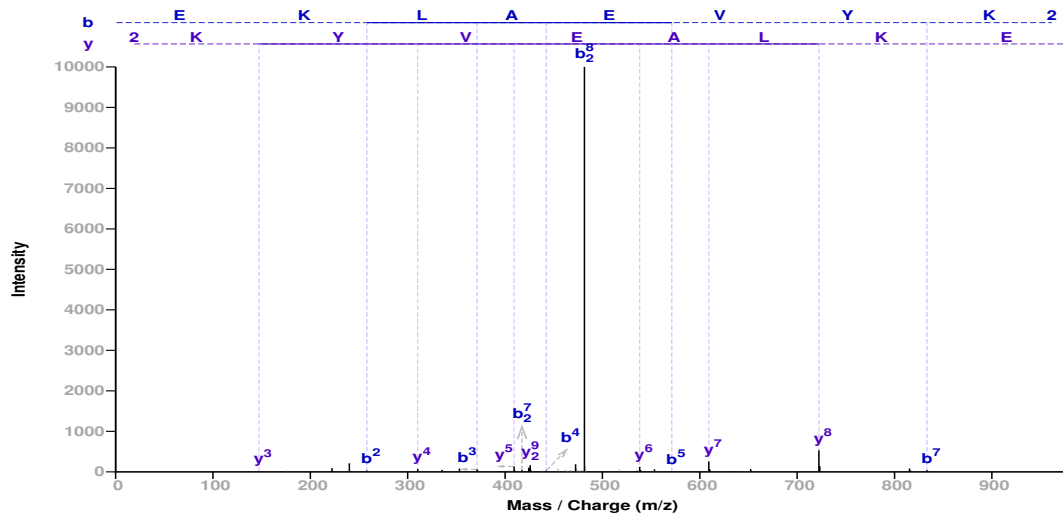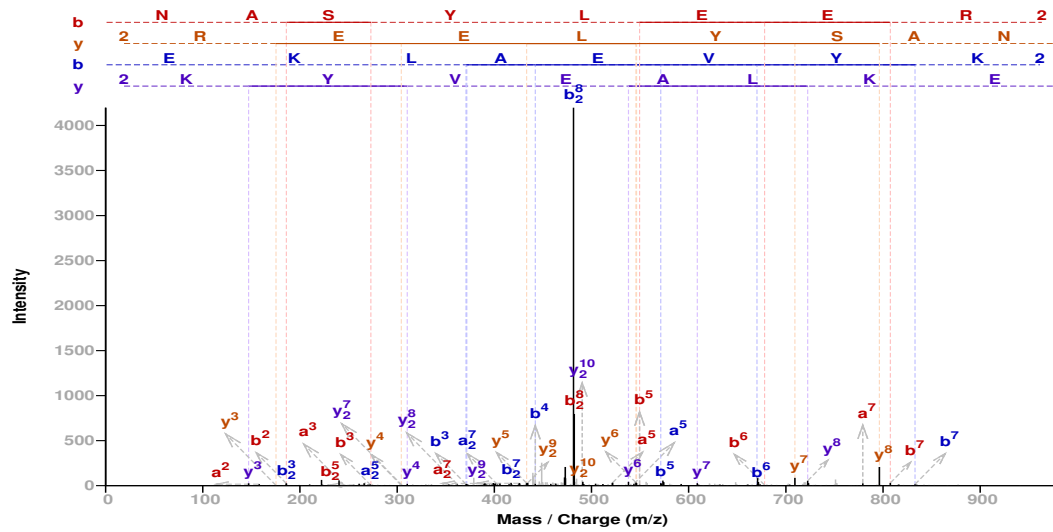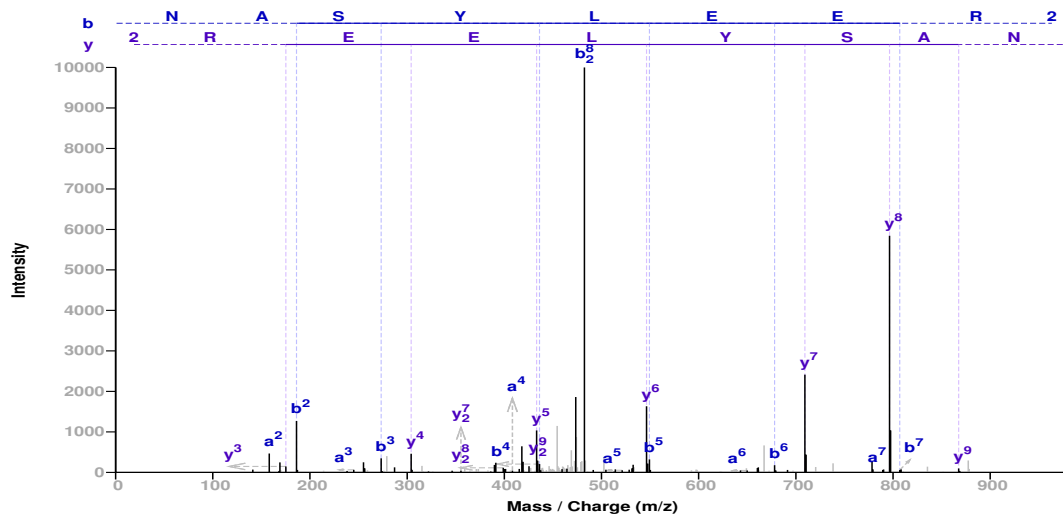

yeast2\_Scan\_Number\_6008 Precursor m/z: 534.940 cosine: 0.776  $\alpha$ : 0.176

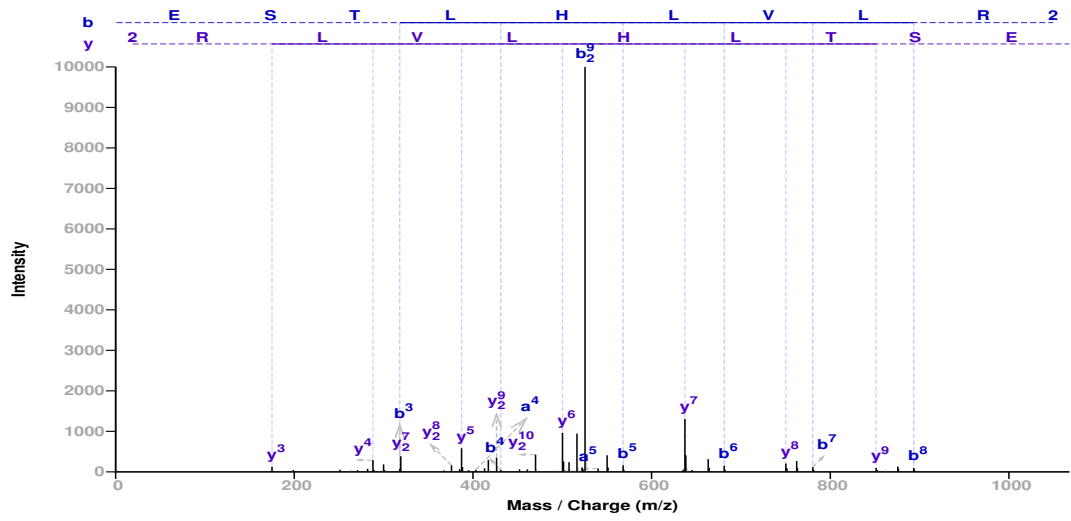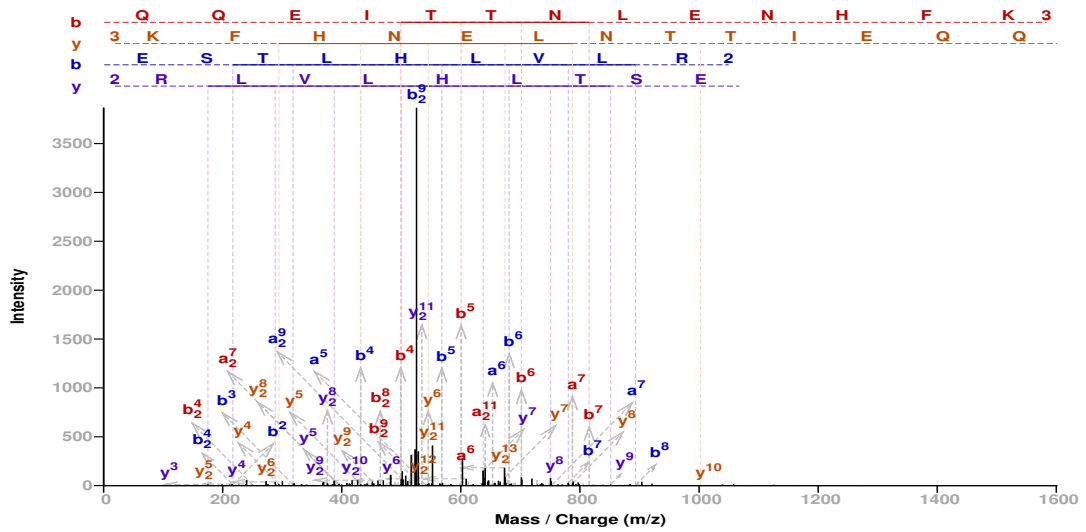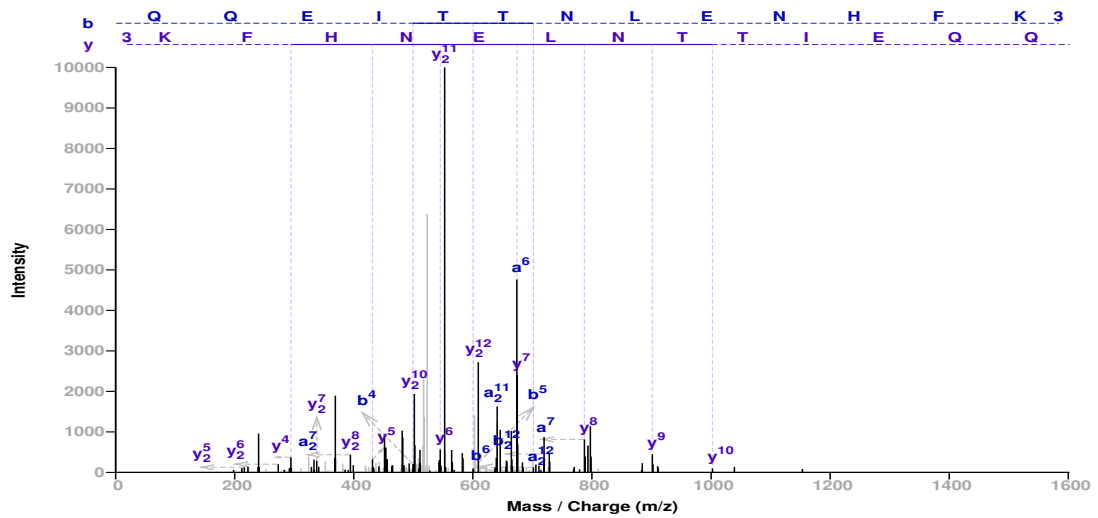



yeast2\_Scan\_Number\_3859 Precursor m/z: 509.270 cosine: 0.794  $\alpha$ : 0.175

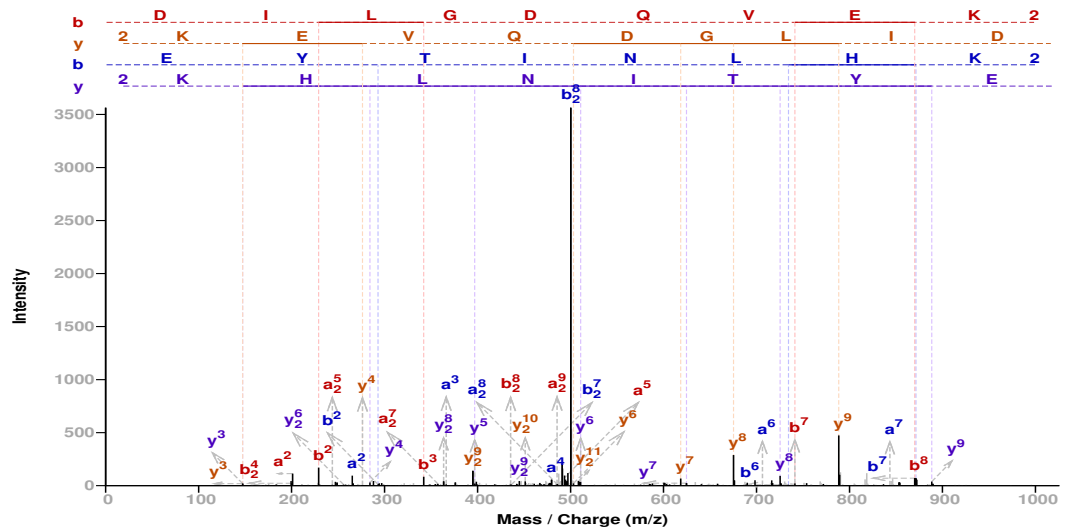

yeast2.Scan\_Number.1565 Precursor m/z: 520.264 cosine: 0.762  $\alpha$ : 0.167

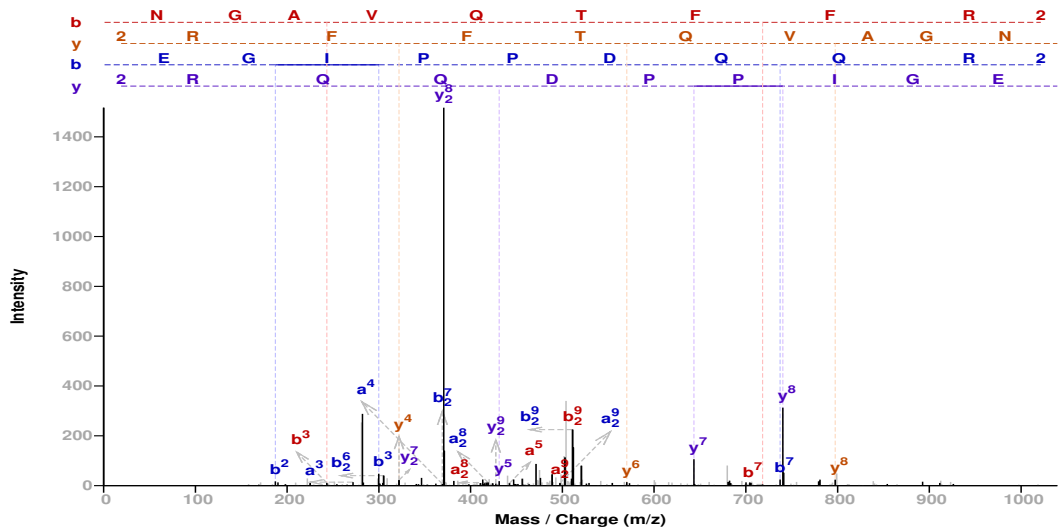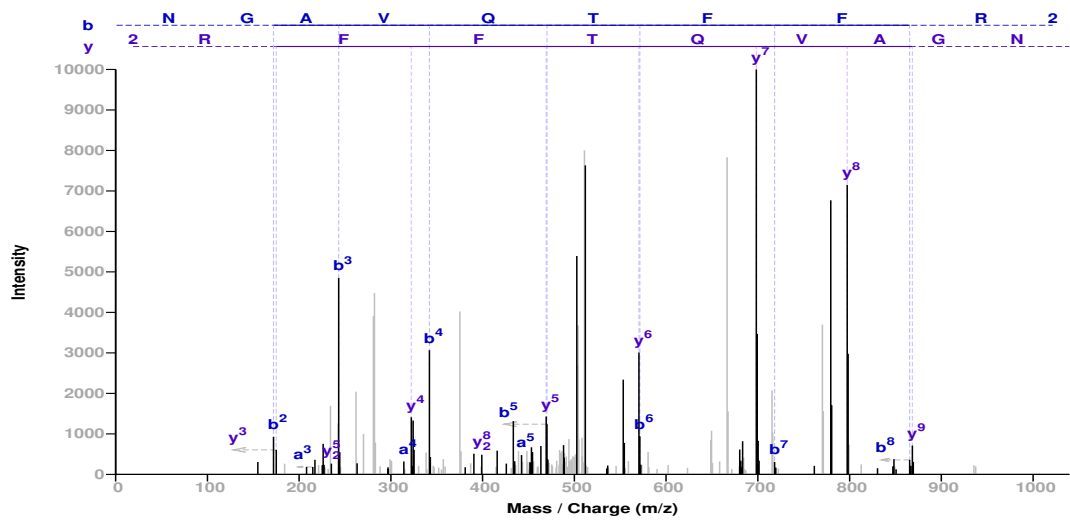

yeast2\_Scan\_Number\_645 Precursor m/z: 442.255 cosine: 0.876  $\alpha$ : 0.167

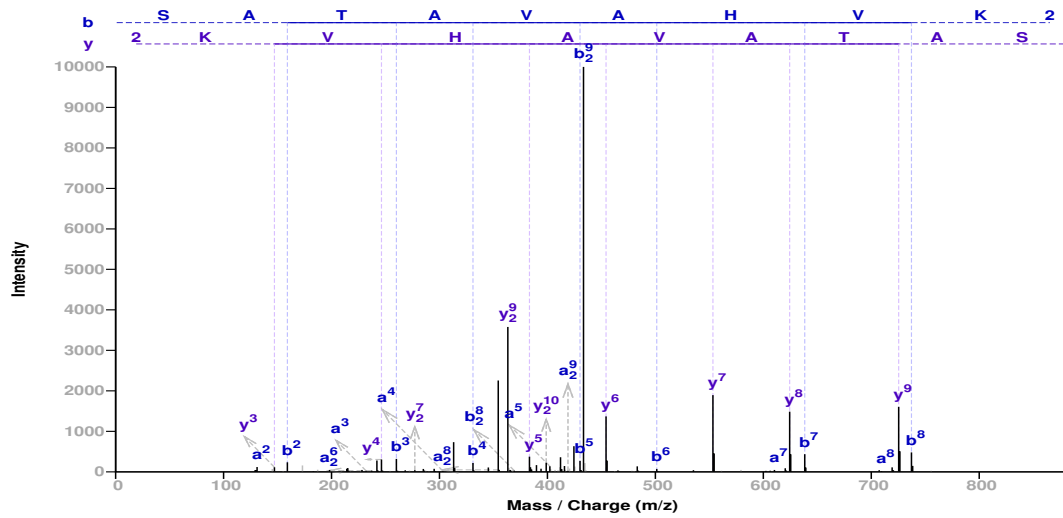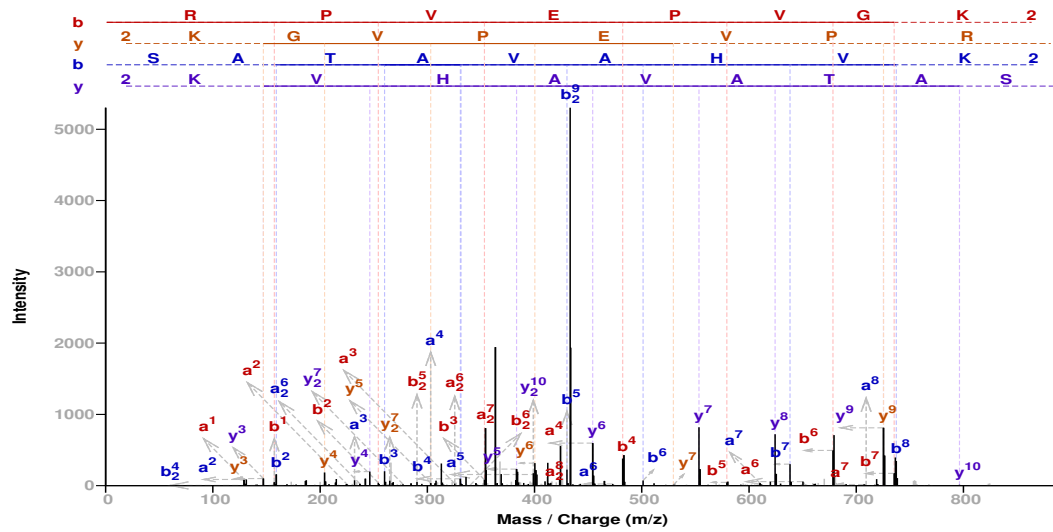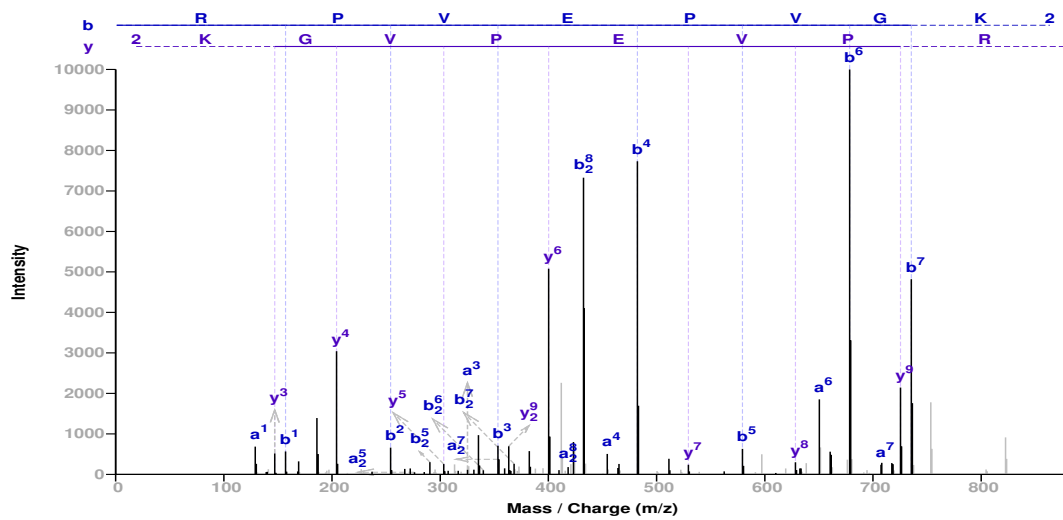



yeast2\_Scan\_Number\_746 Precursor m/z: 417.206 cosine: 0.902  $\alpha$ : 0.163

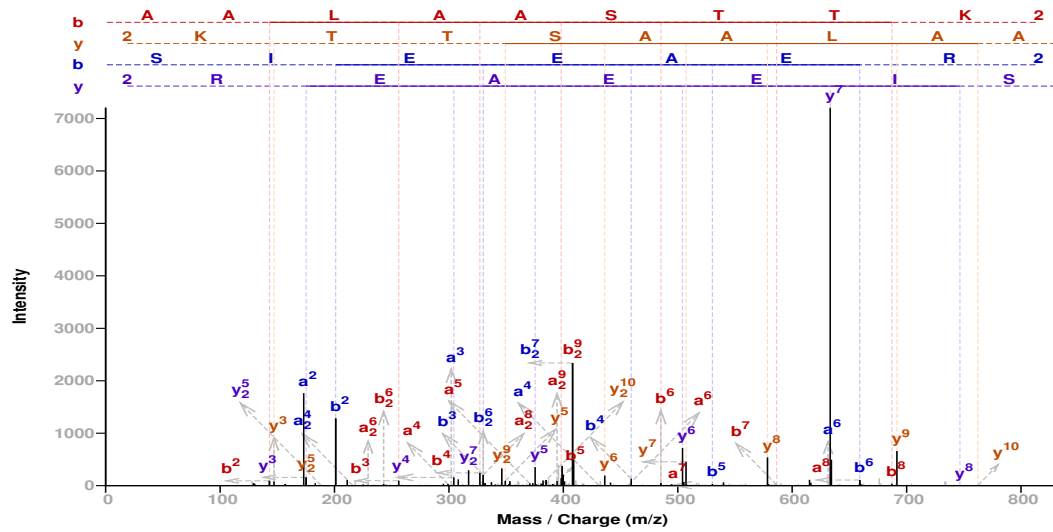

yeast2\_Scan\_Number\_2464 Precursor m/z: 504.774 cosine: 0.801  $\alpha$ : 0.158

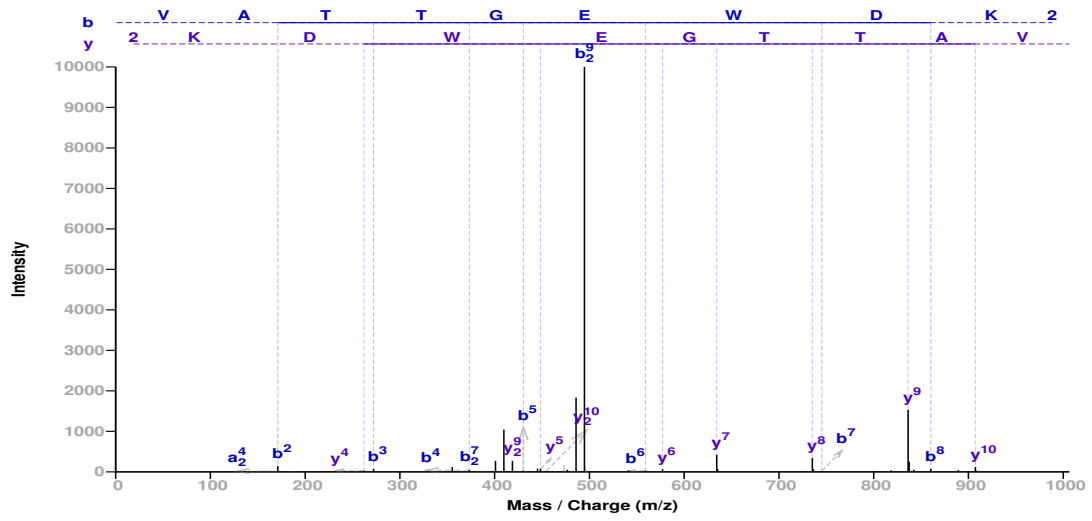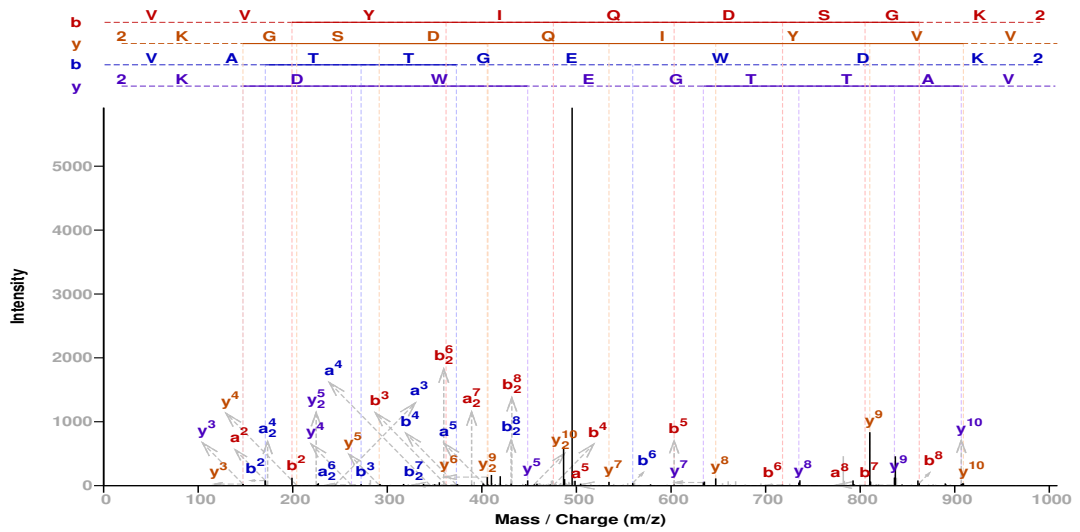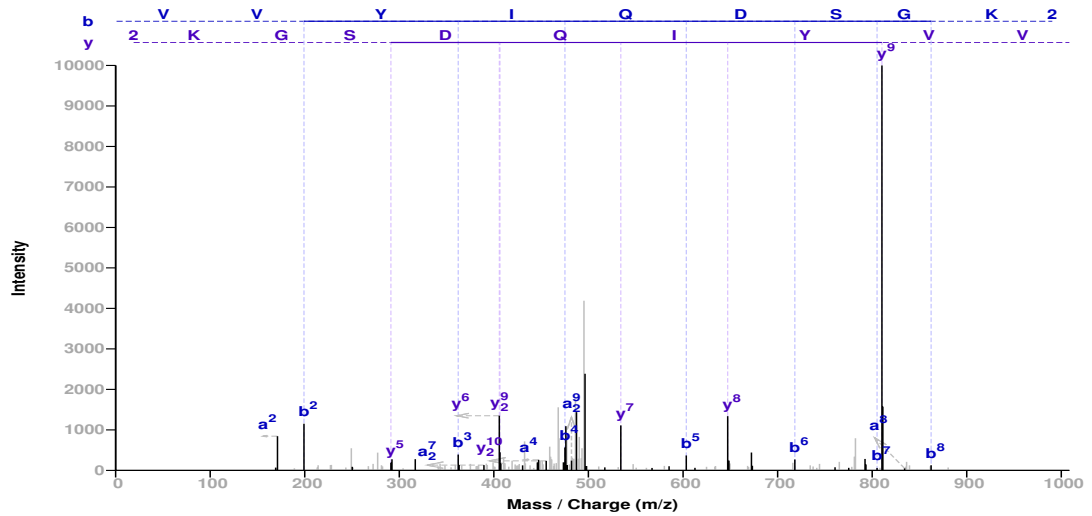

yeast2\_Scan\_Number\_4143 Precursor m/z: 379.531 cosine: 0.895  $\alpha$ : 0.158

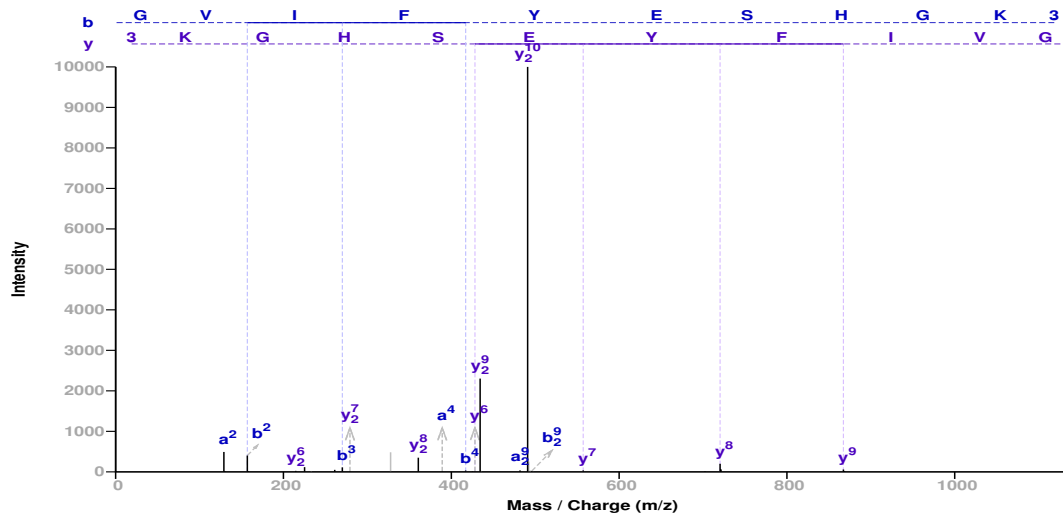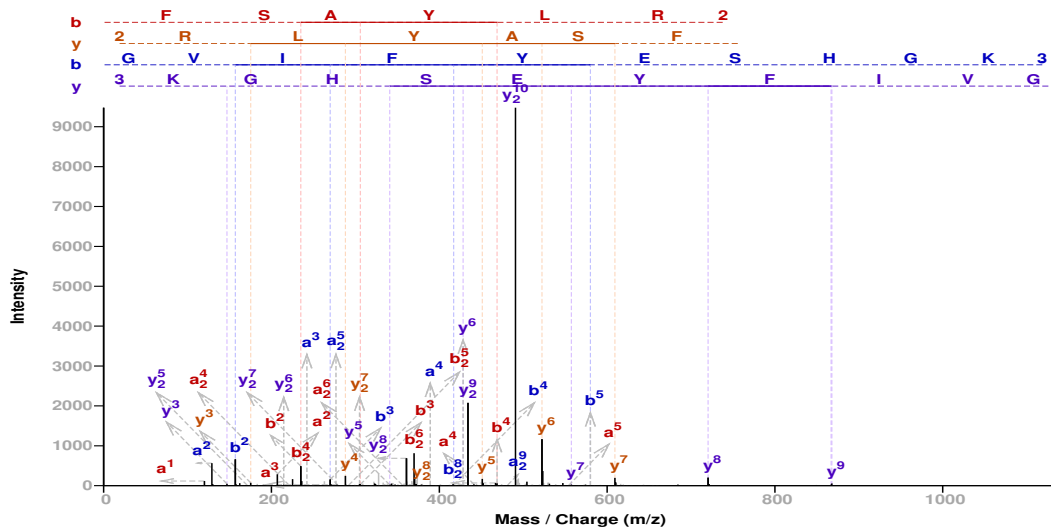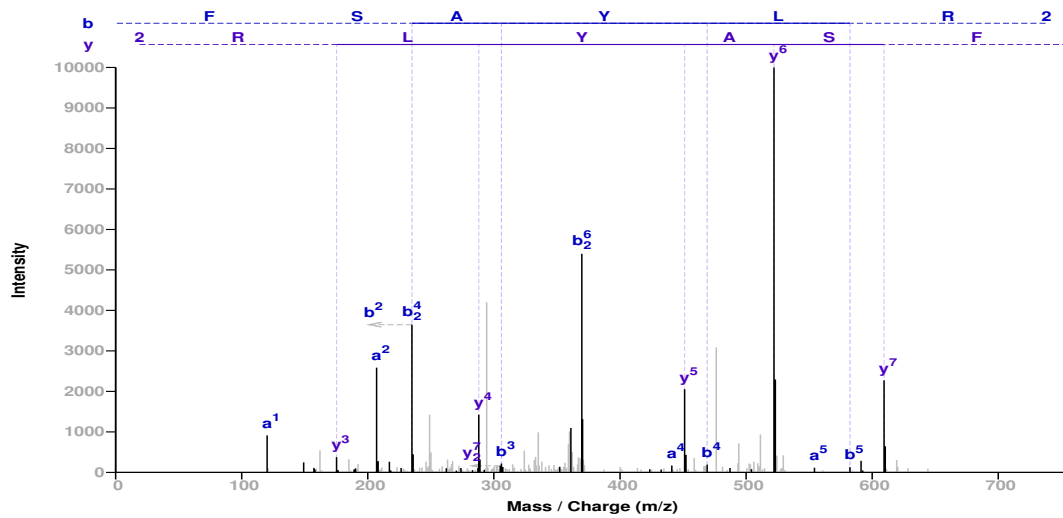





yeast2\_Scan\_Number\_6779 Precursor m/z: 583.289 cosine: 0.802  $\alpha$ : 0.144

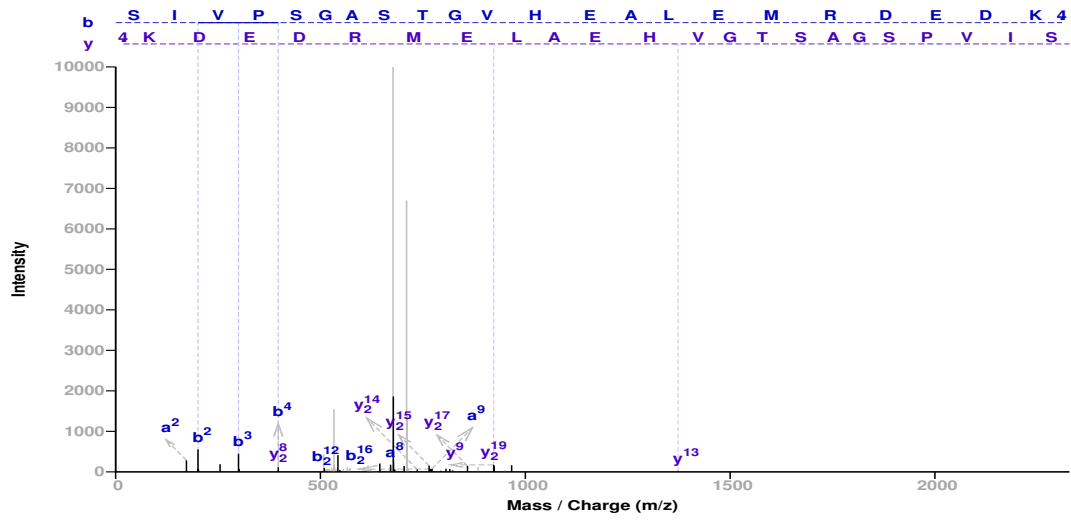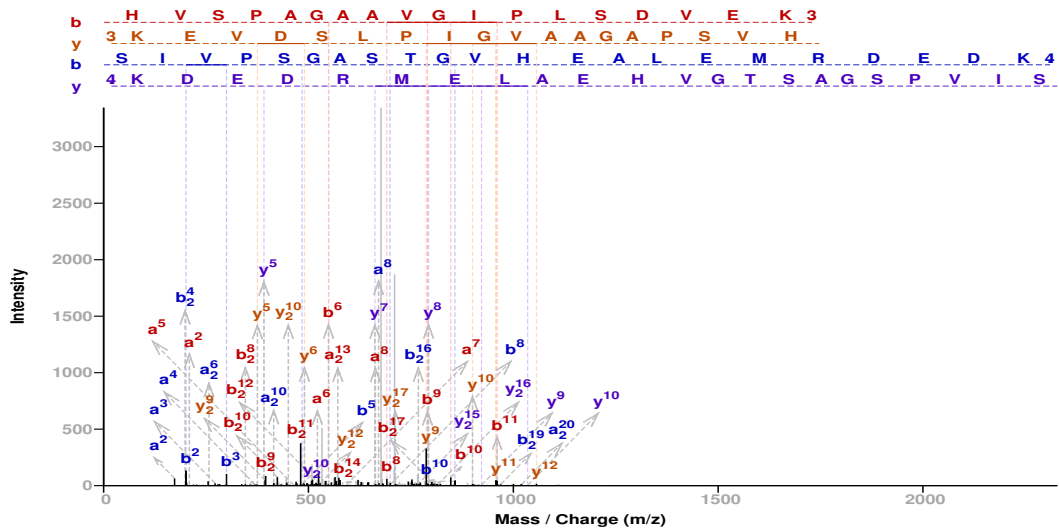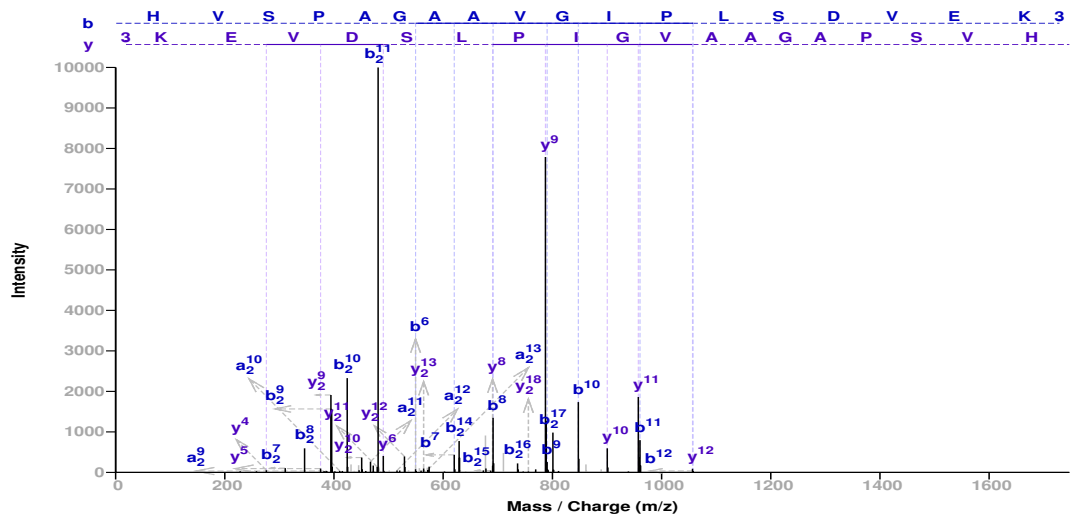

yeast2\_Scan\_Number\_6256 Precursor m/z: 436.584 cosine: 0.819  $\alpha$ : 0.142

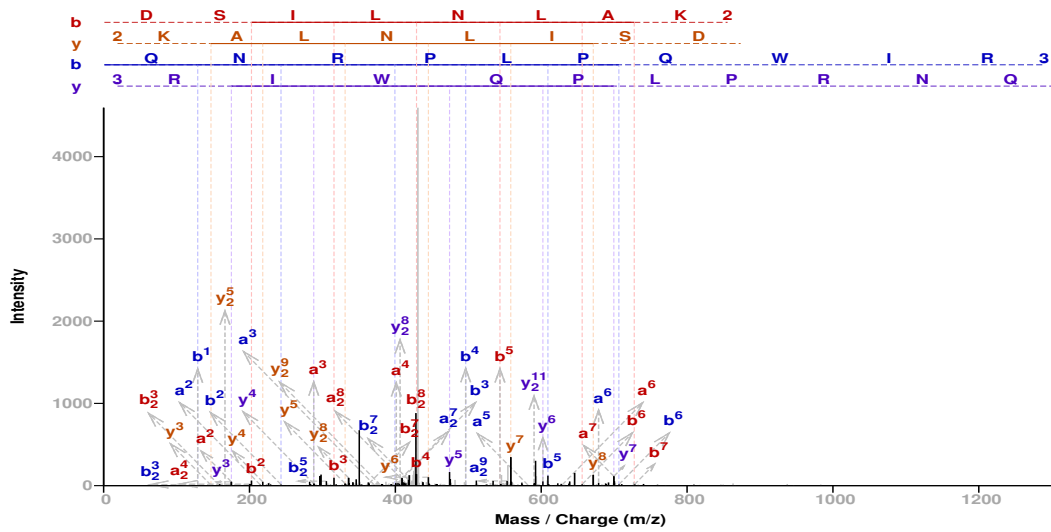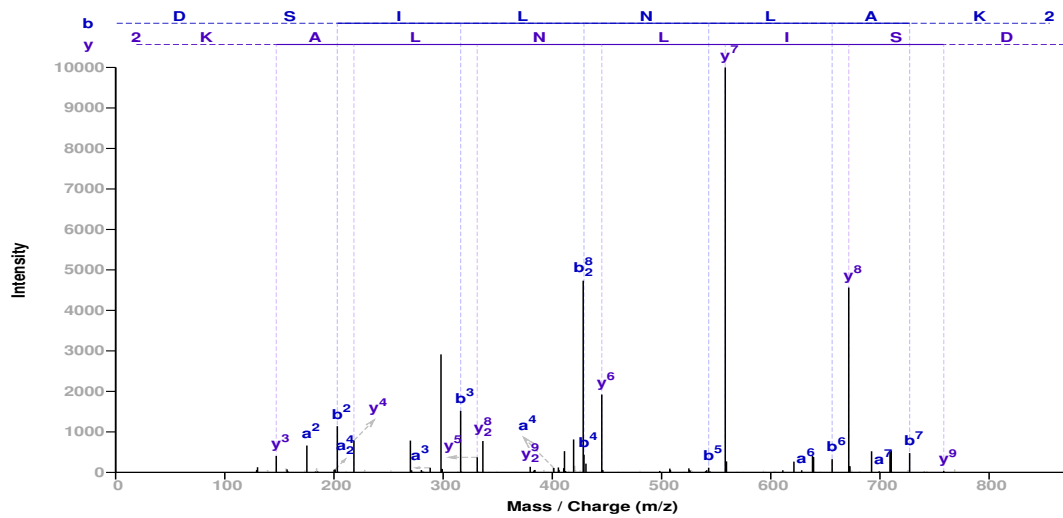

yeast2\_Scan\_Number\_7346 Precursor m/z: 433.251 cosine: 0.800  $\alpha$ : 0.140

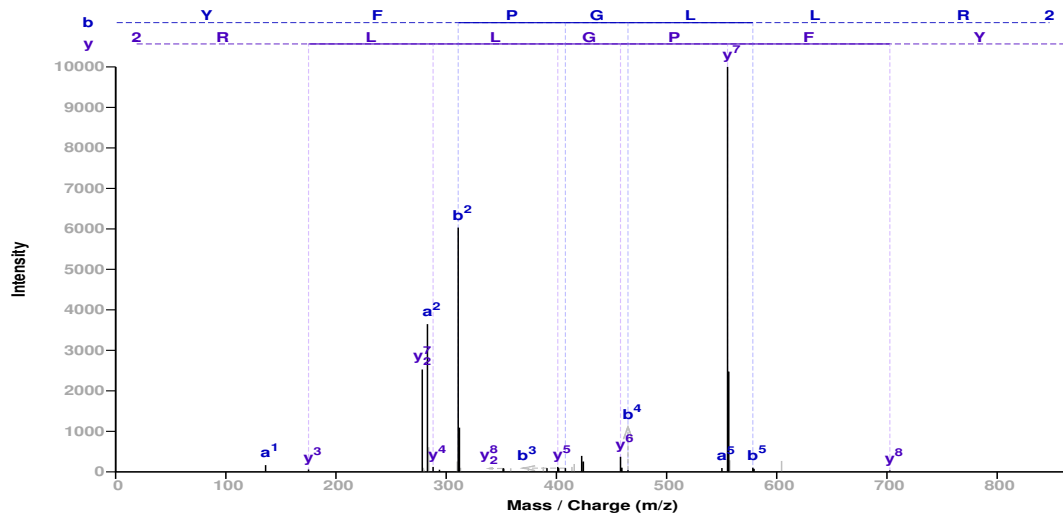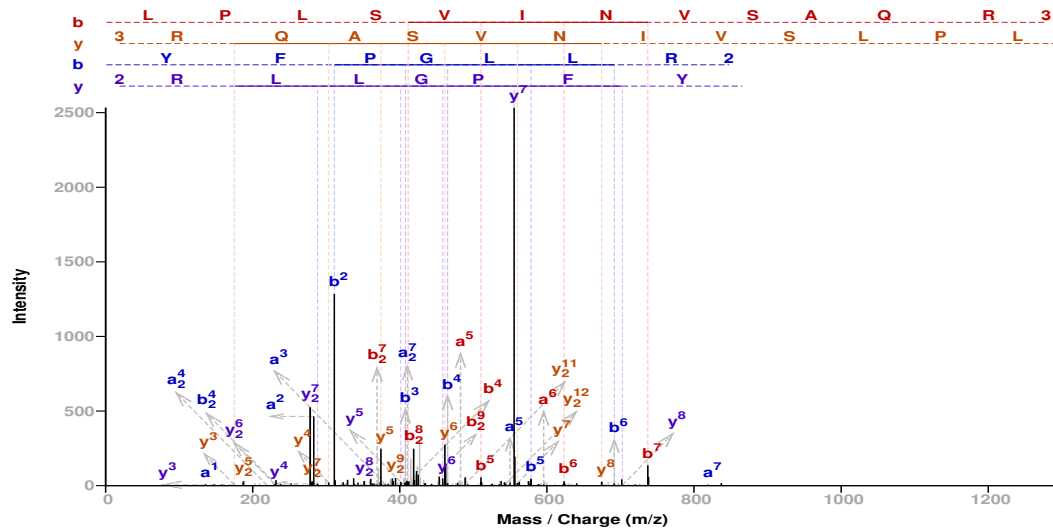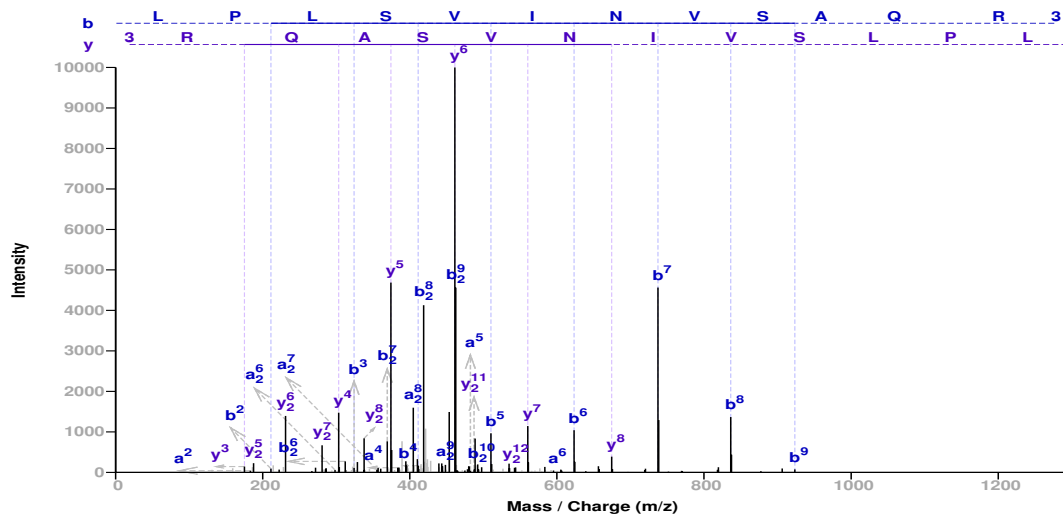

yeast2\_Scan\_Number\_874 Precursor m/z: 458.761 cosine: 0.781  $\alpha$ : 0.140

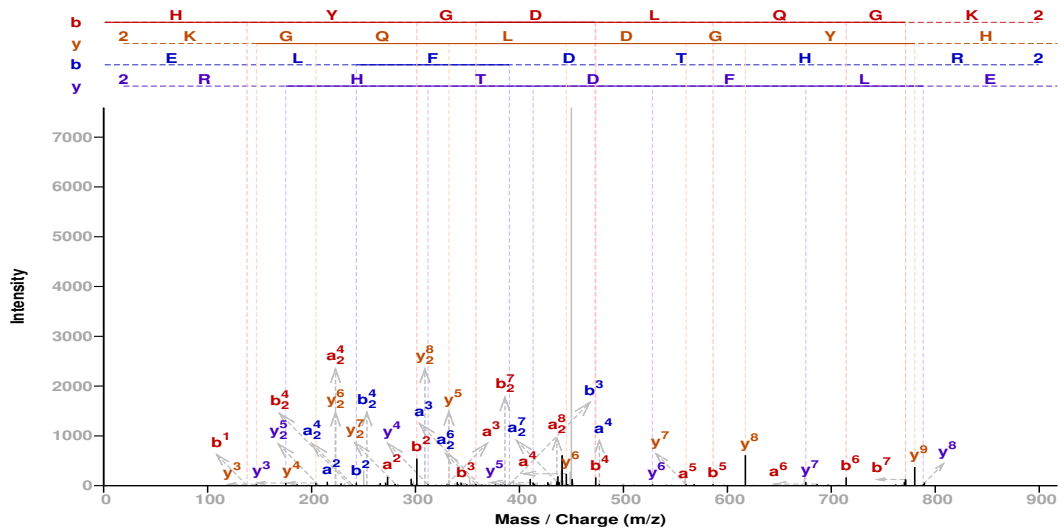

yeast2\_Scan\_Number\_1402 Precursor m/z: 348.527 cosine: 0.843  $\alpha$ : 0.129

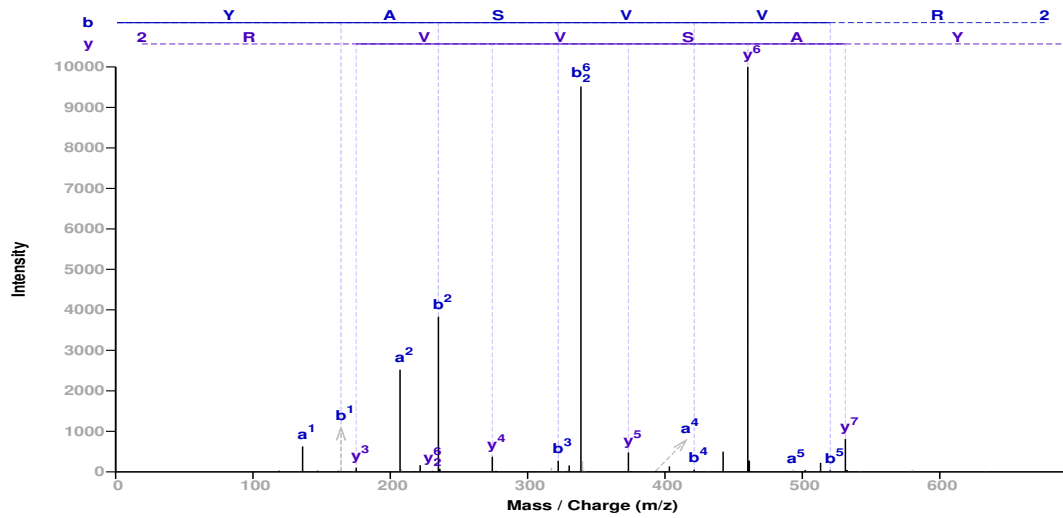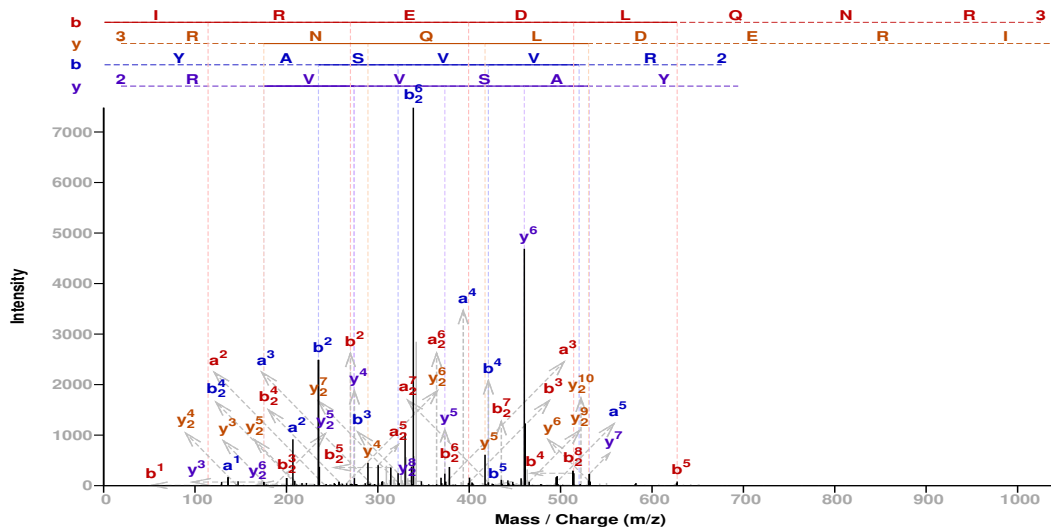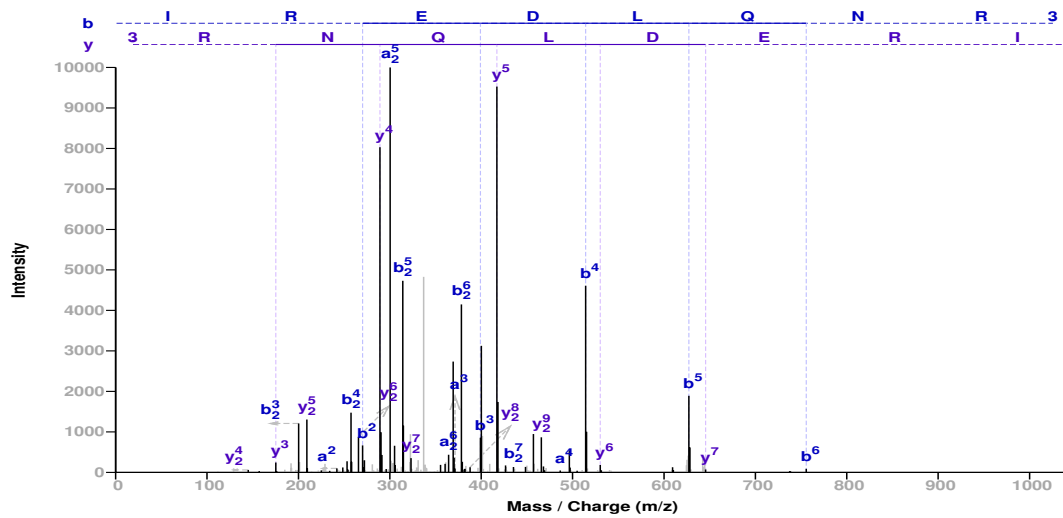

yeast2\_Scan\_Number\_3230 Precursor m/z: 427.888 cosine: 0.874  $\alpha$ : 0.126

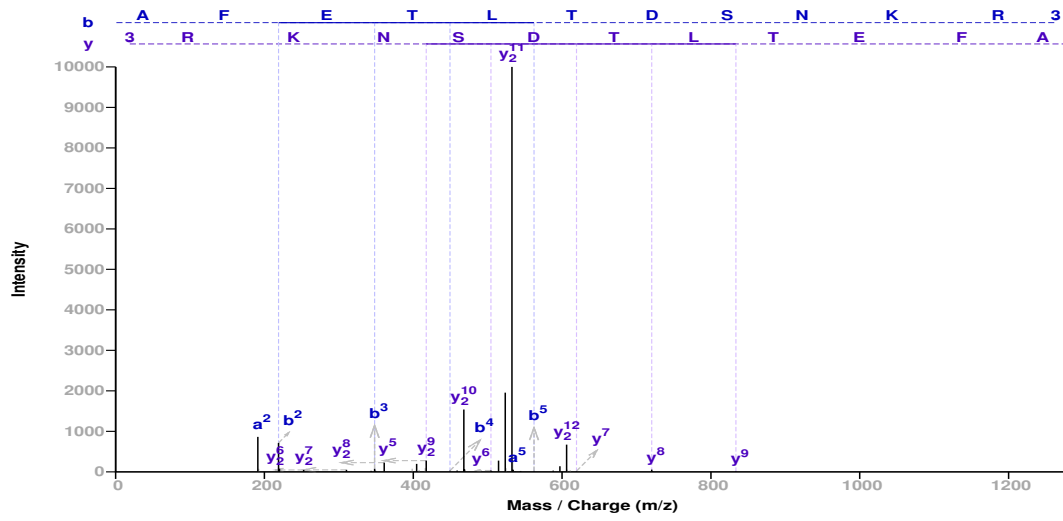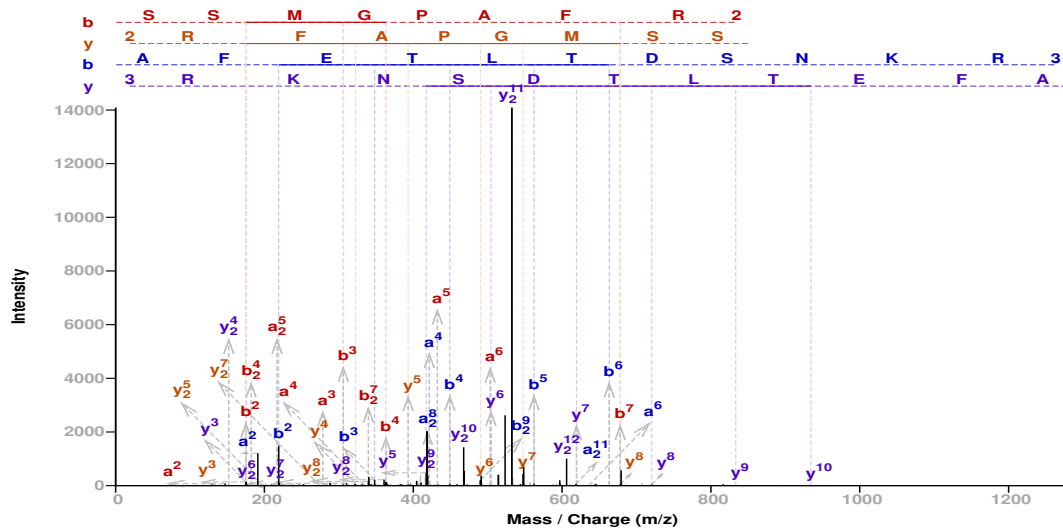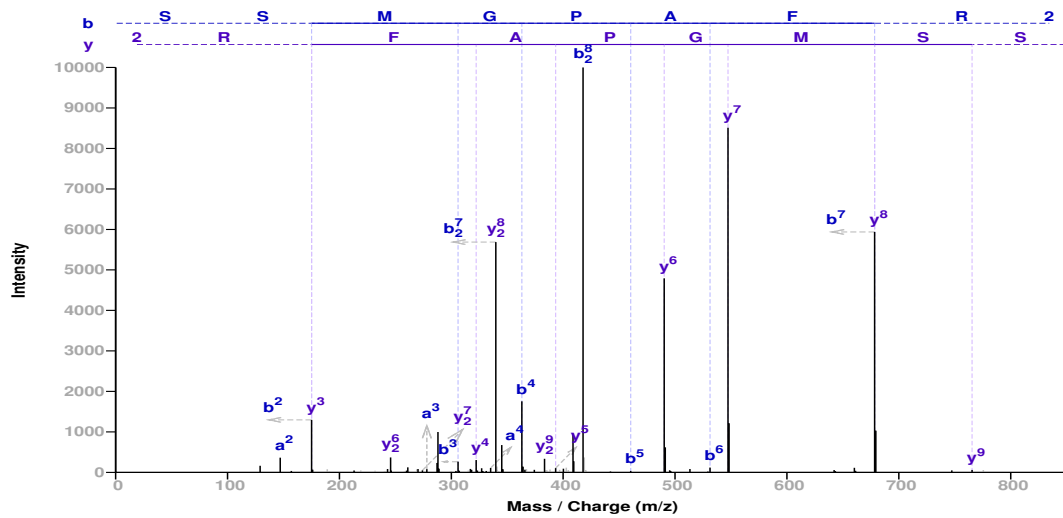

yeast2\_Scan\_Number\_4097 Precursor m/z: 545.285 cosine: 0.853  $\alpha$ : 0.100

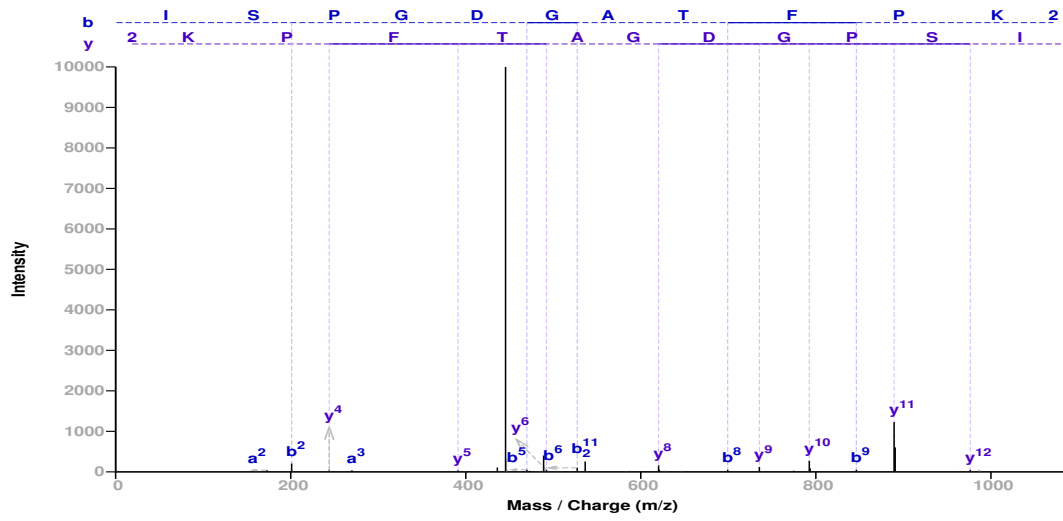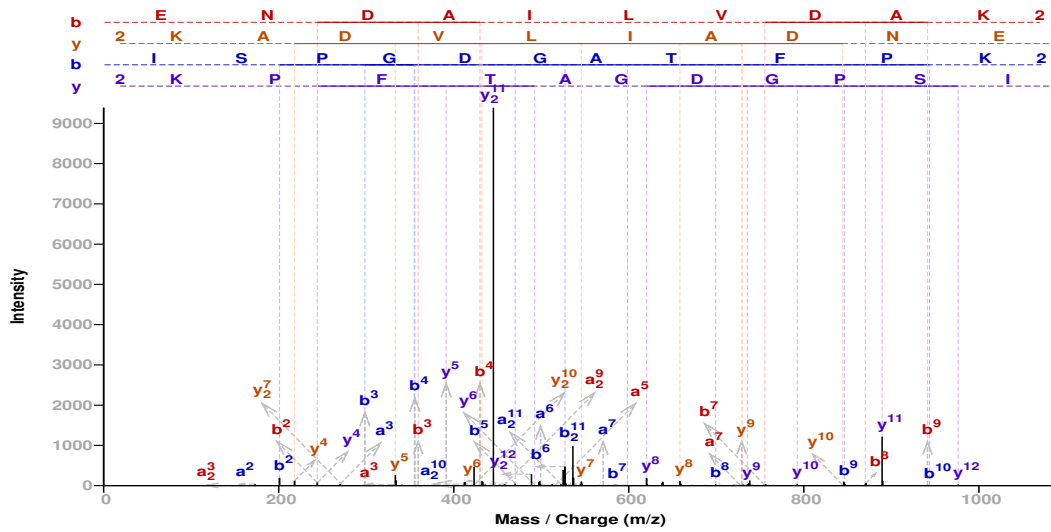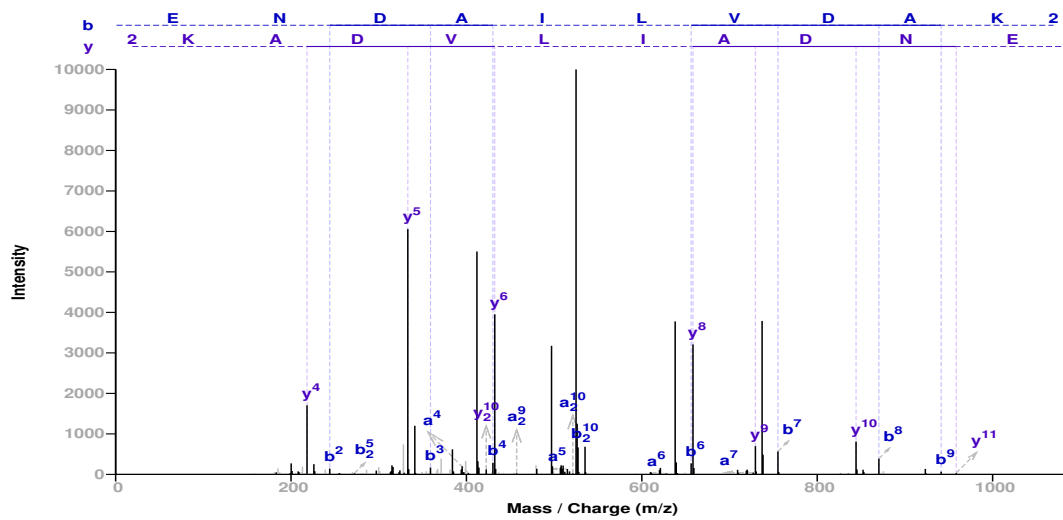

yeast2\_Scan\_Number\_5025 Precursor m/z: 501.295 cosine: 0.929  $\alpha$ : 0.100

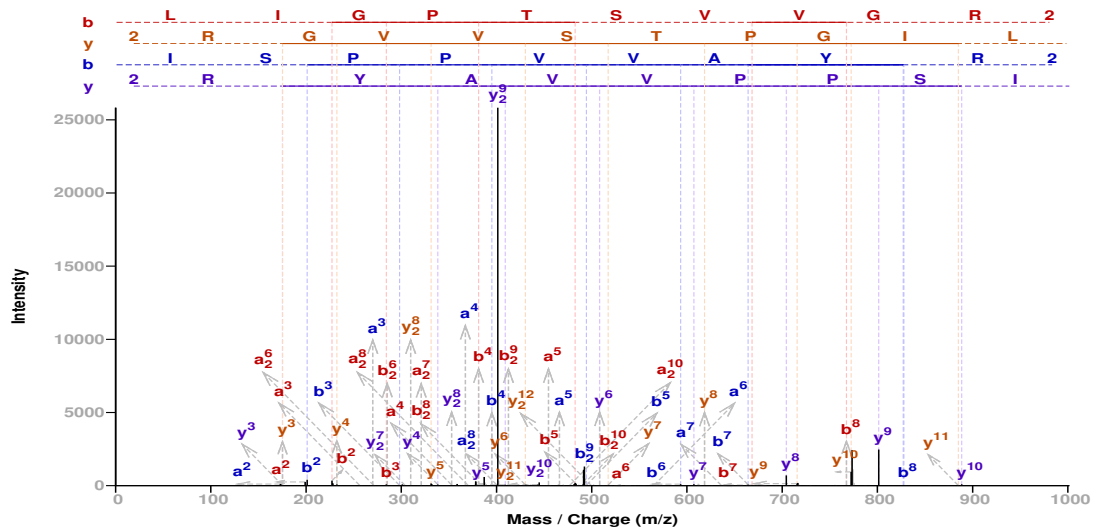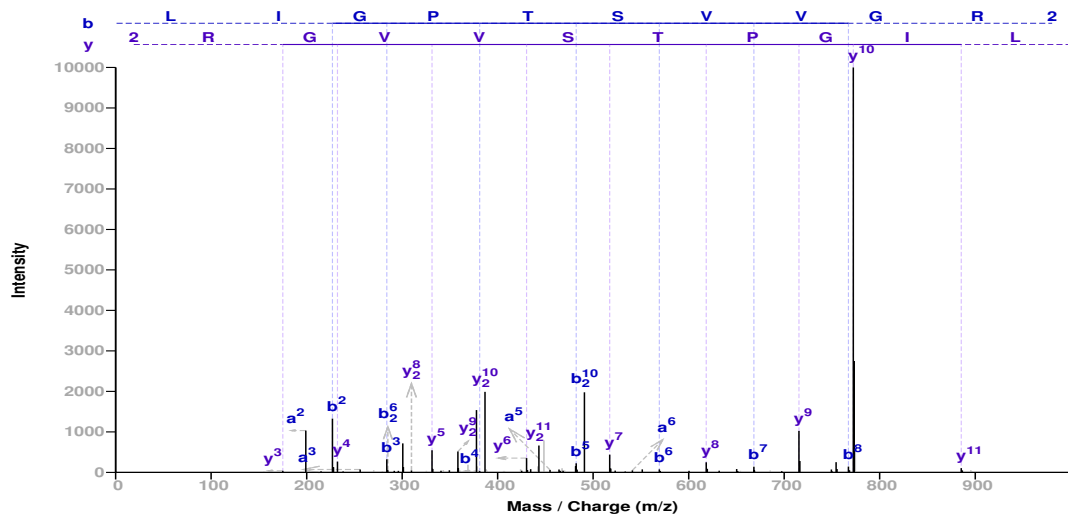



yeast3\_Scan\_Number.1856 Precursor m/z: 502.760 cosine: 0.771  $\alpha$ : 0.993

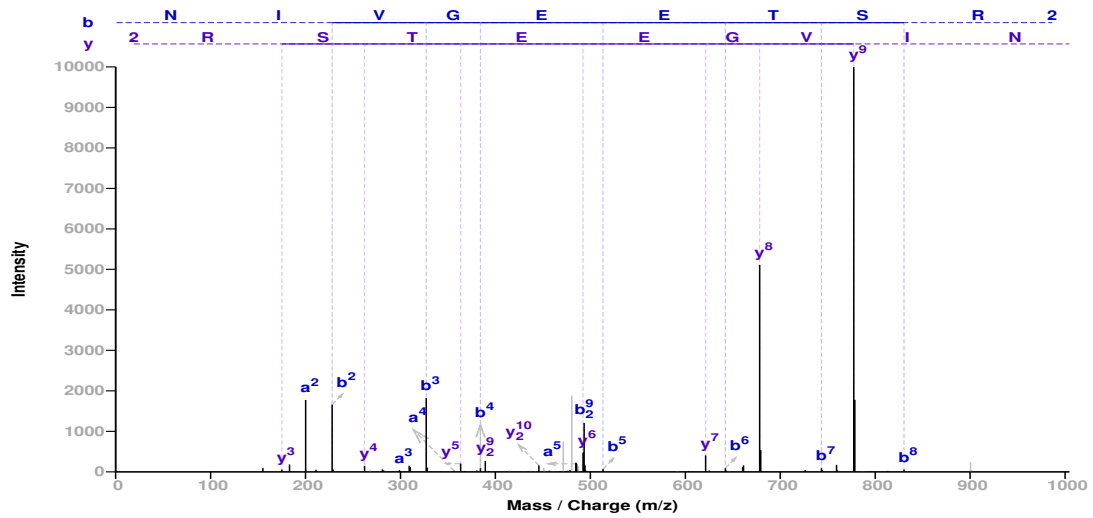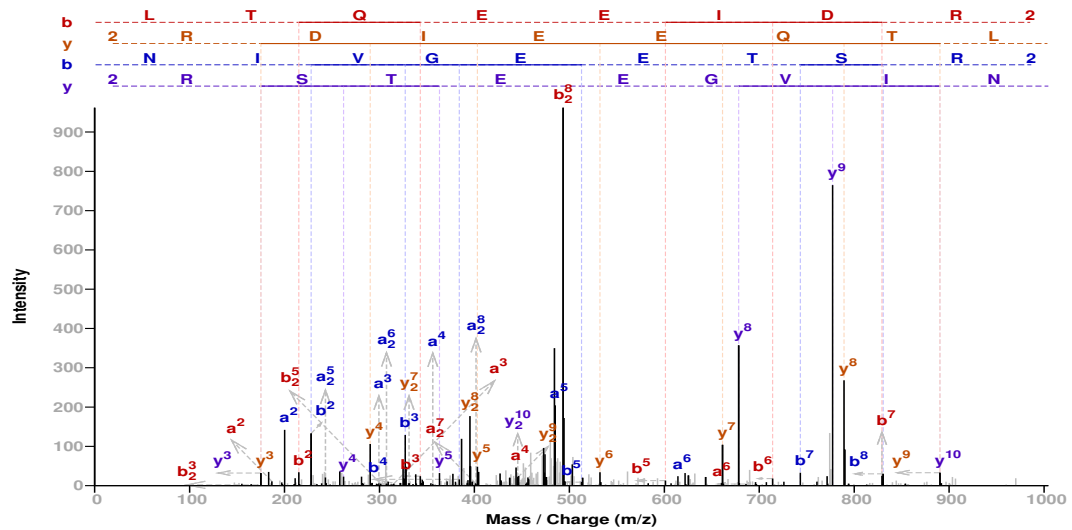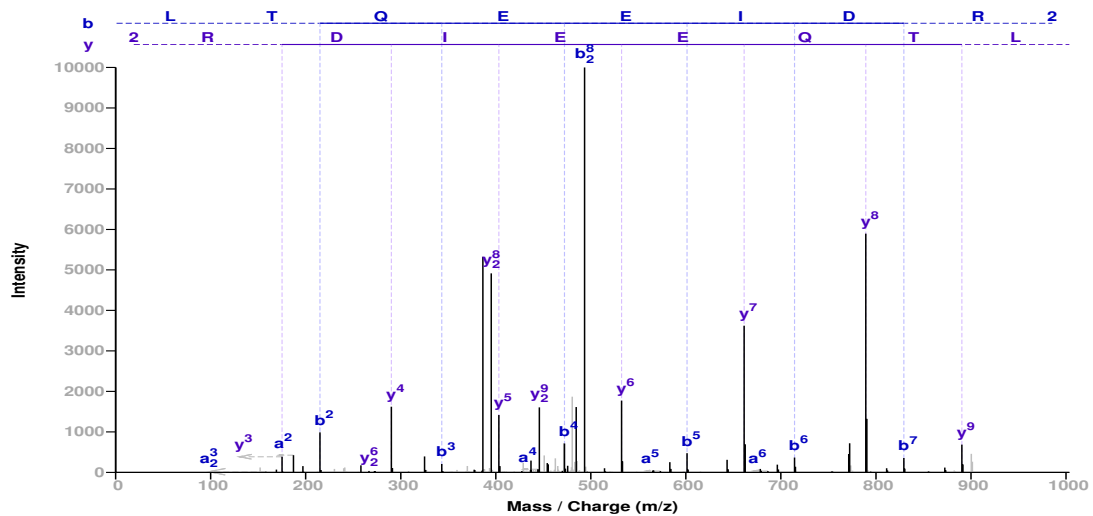

yeast3\_Scan\_Number\_7425 Precursor m/z: 593.340 cosine: 0.901  $\alpha$ : 0.971

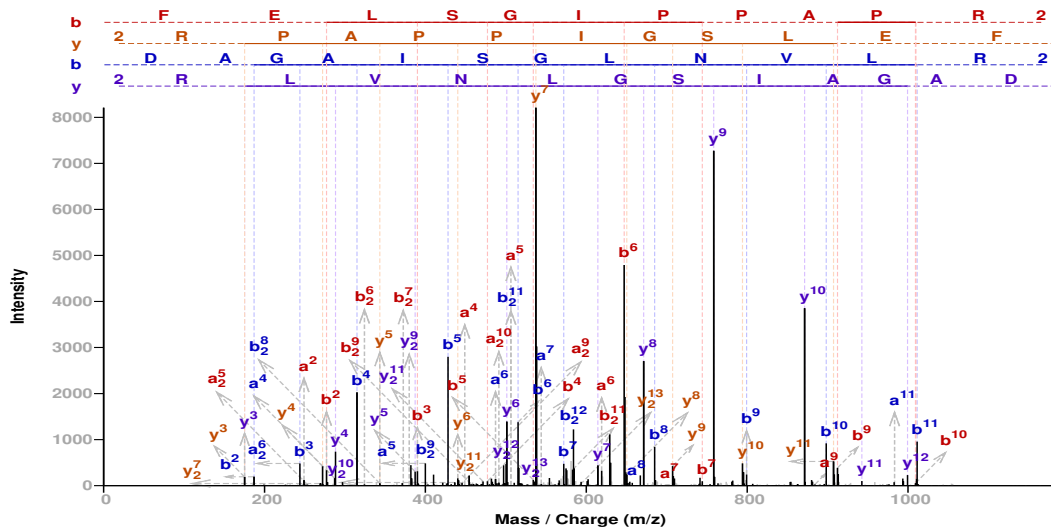

yeast3\_Scan\_Number\_6716 Precursor m/z: 757.403 cosine: 0.780  $\alpha$ : 0.966

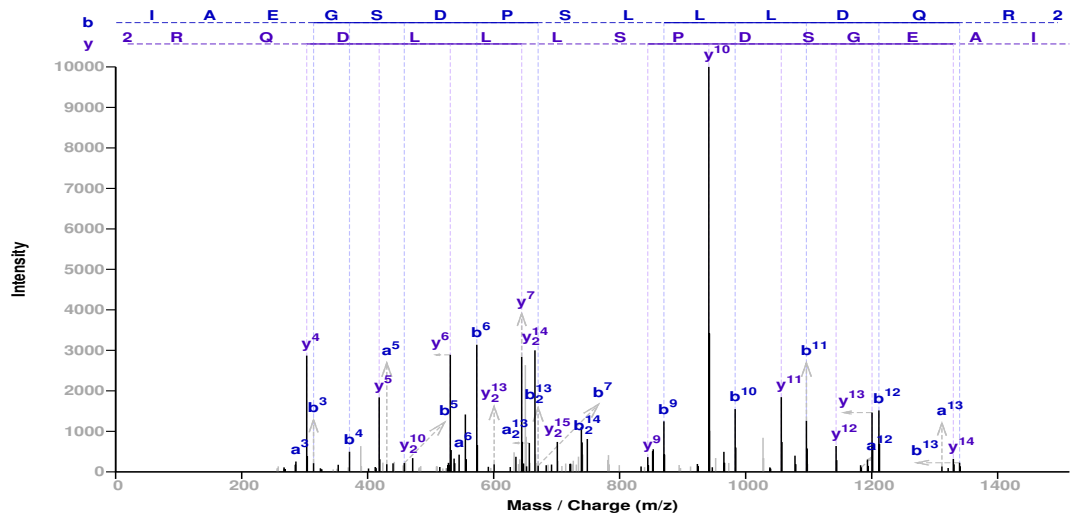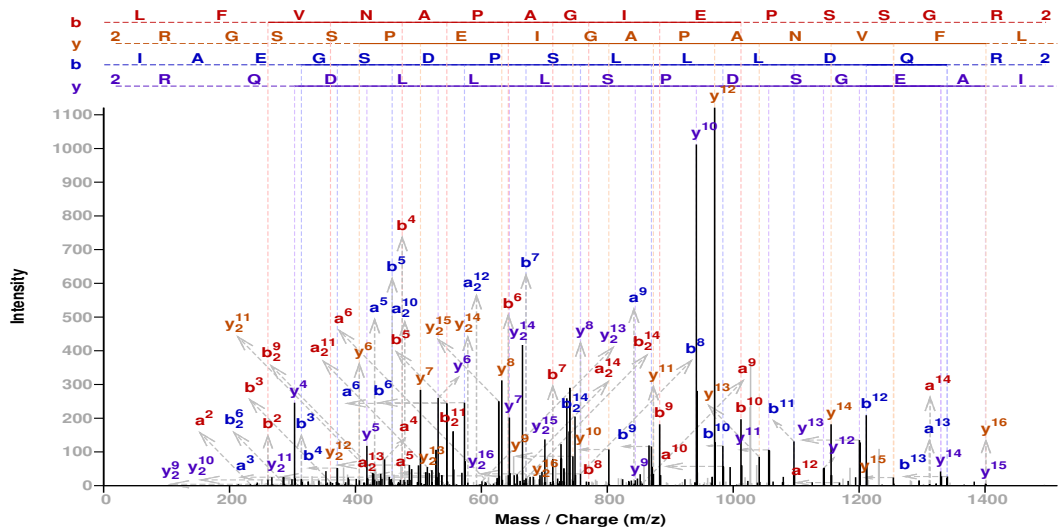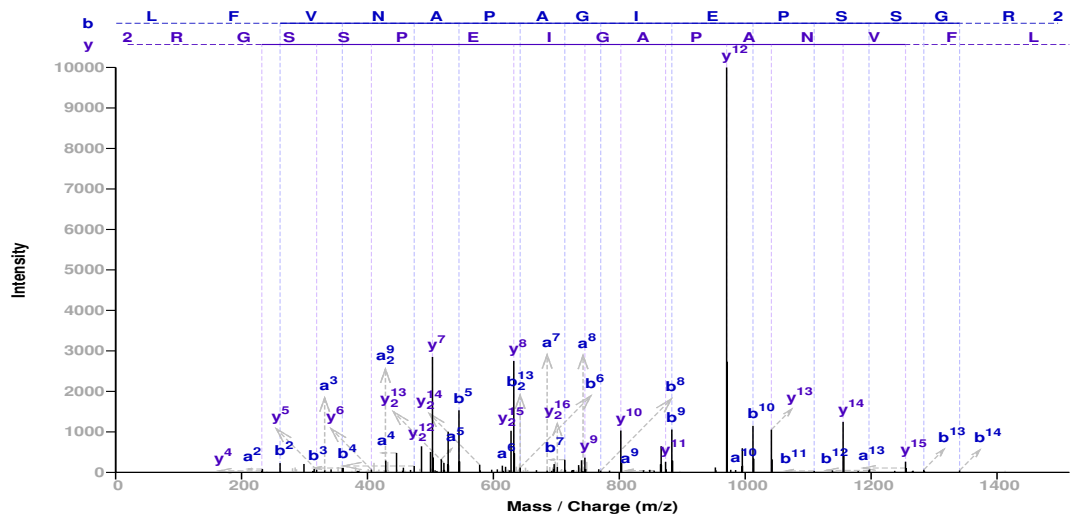

yeast3\_Scan\_Number\_7389 Precursor m/z: 574.640 cosine: 0.766  $\alpha$ : 0.964

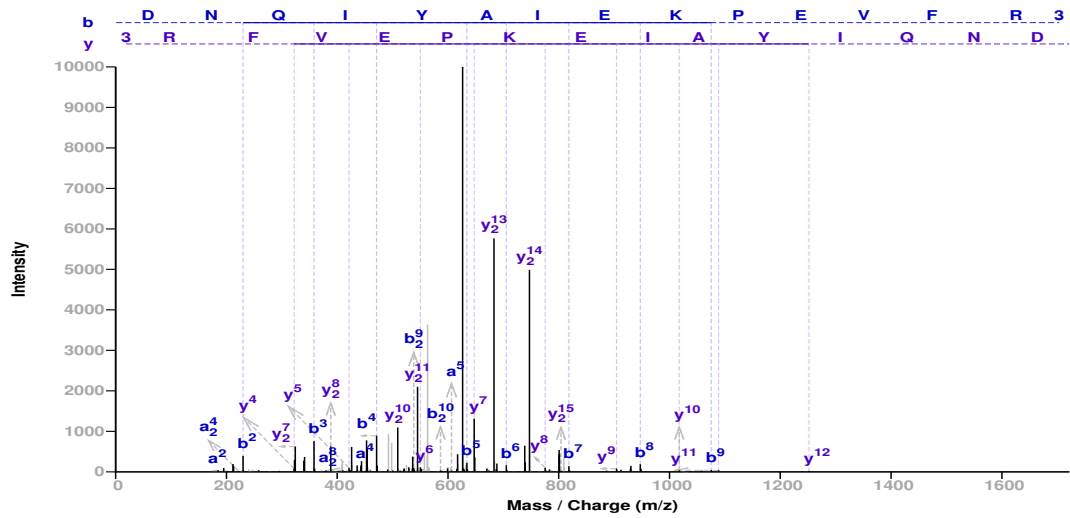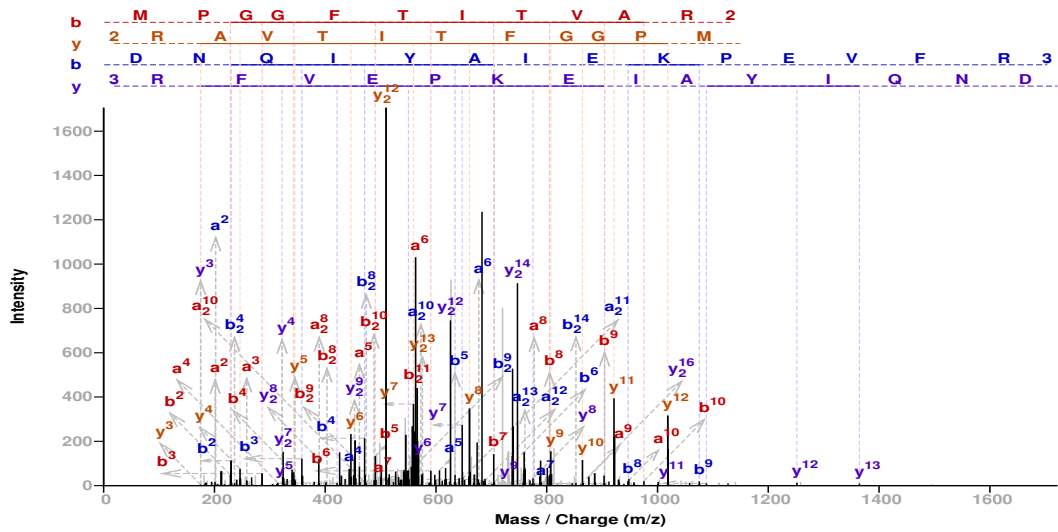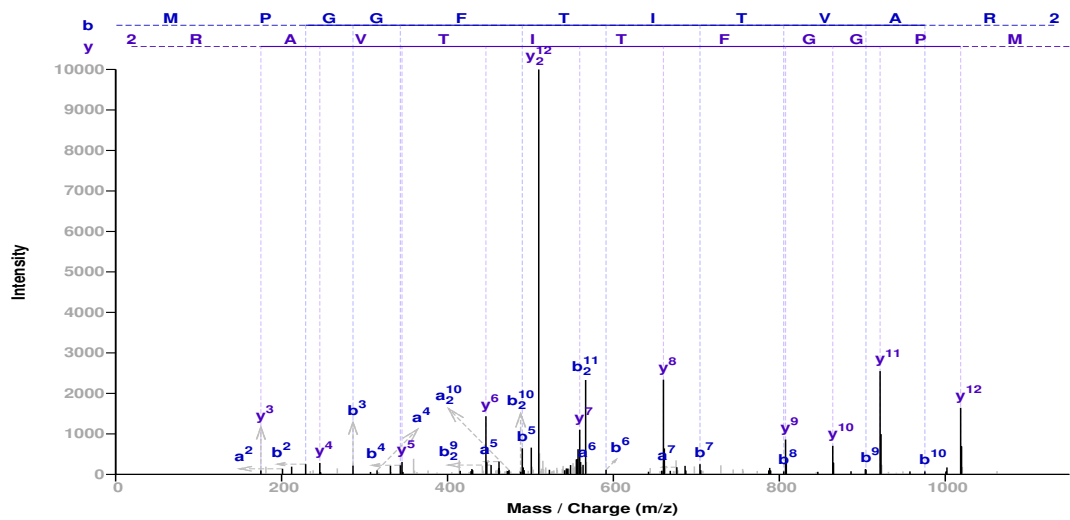

yeast3\_Scan\_Number\_2869 Precursor m/z: 613.343 cosine: 0.802  $\alpha$ : 0.949

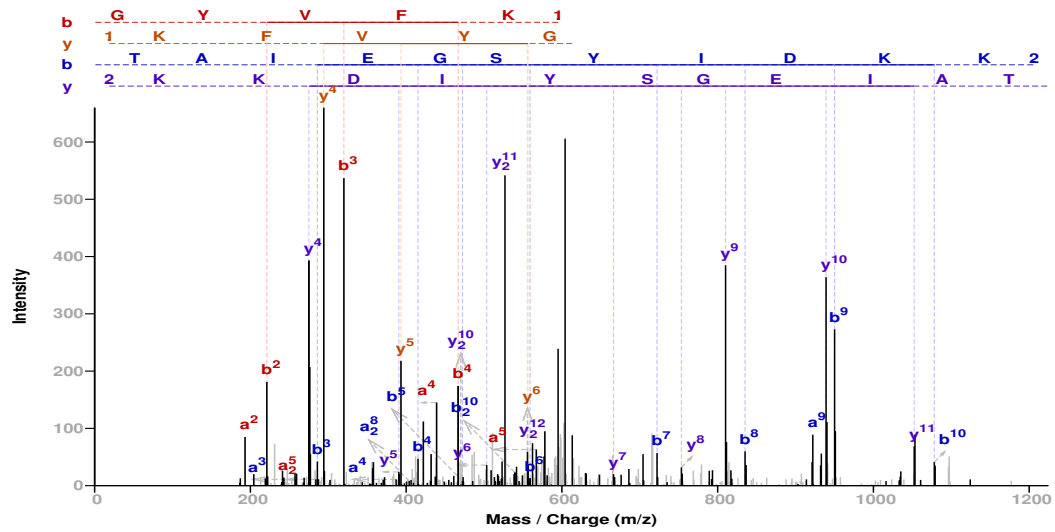

yeast3\_Scan\_Number\_2329 Precursor m/z: 424.735 cosine: 0.748  $\alpha$ : 0.946

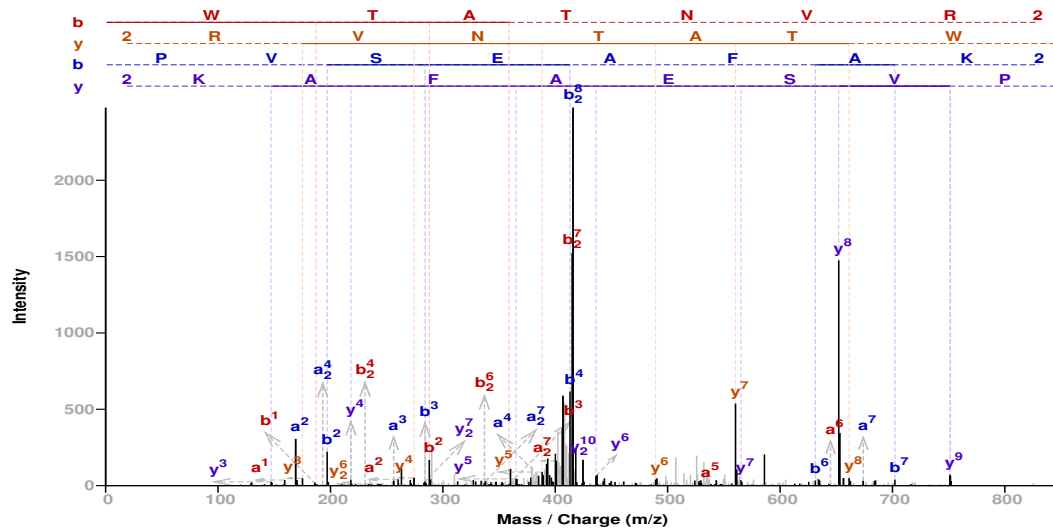

yeast3\_Scan\_Number\_4327 Precursor m/z: 444.764 cosine: 0.888  $\alpha$ : 0.926

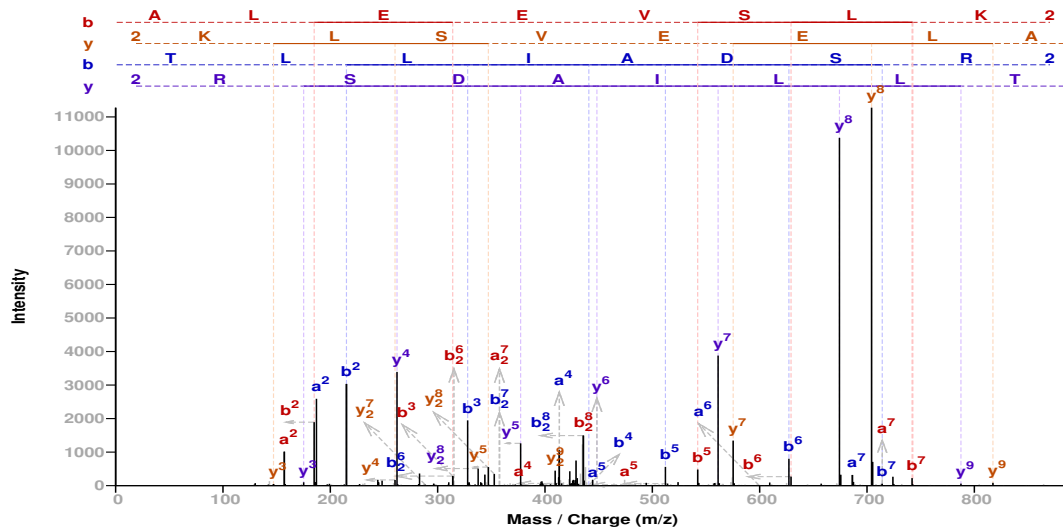

yeast3\_Scan\_Number\_5078 Precursor m/z: 531.256 cosine: 0.724  $\alpha$ : 0.919

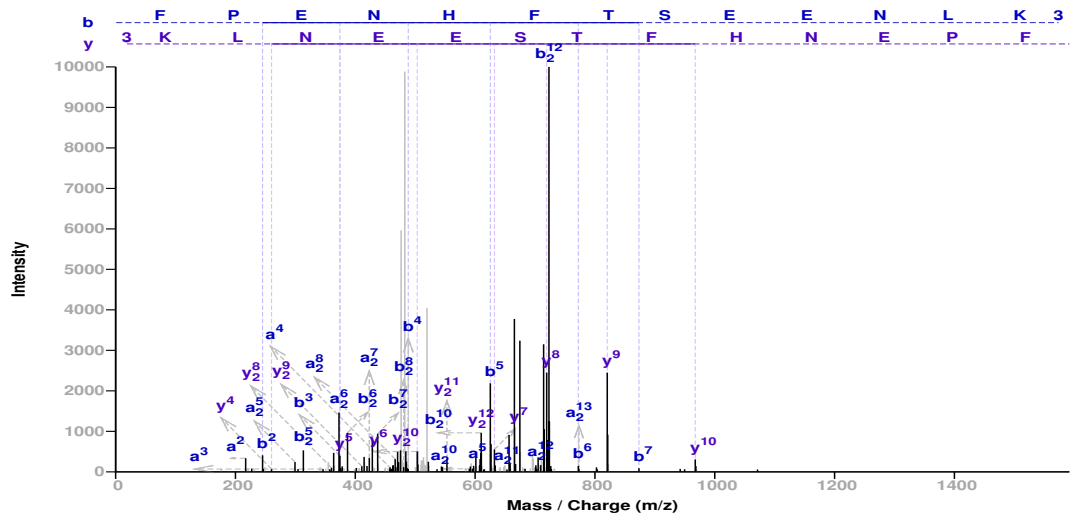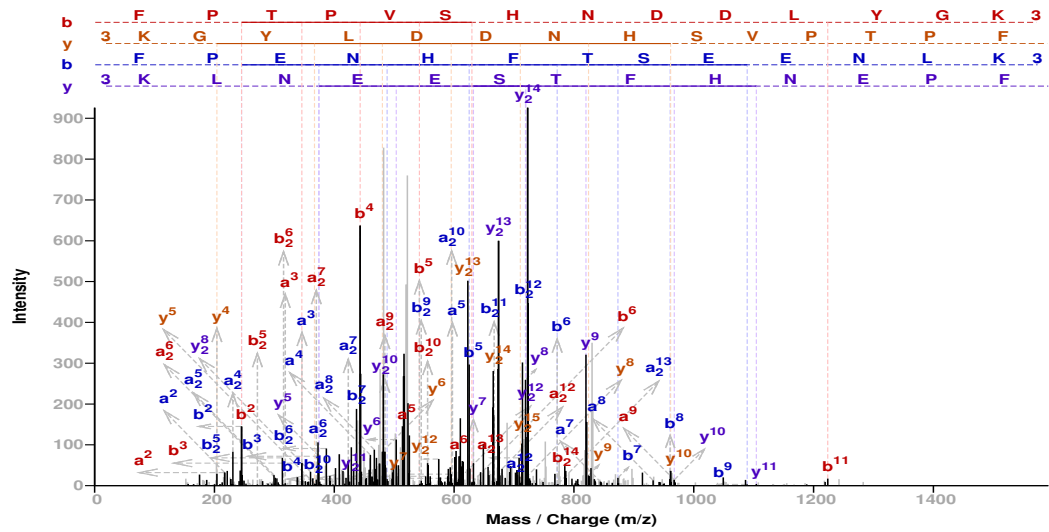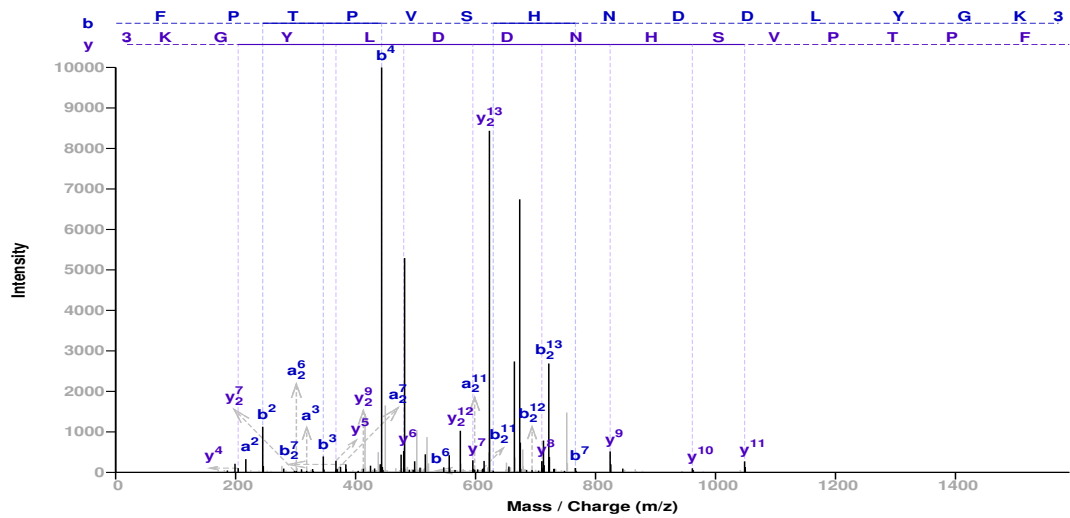



yeast3\_Scan\_Number\_5622 Precursor m/z: 773.424 cosine: 0.805  $\alpha$ : 0.909

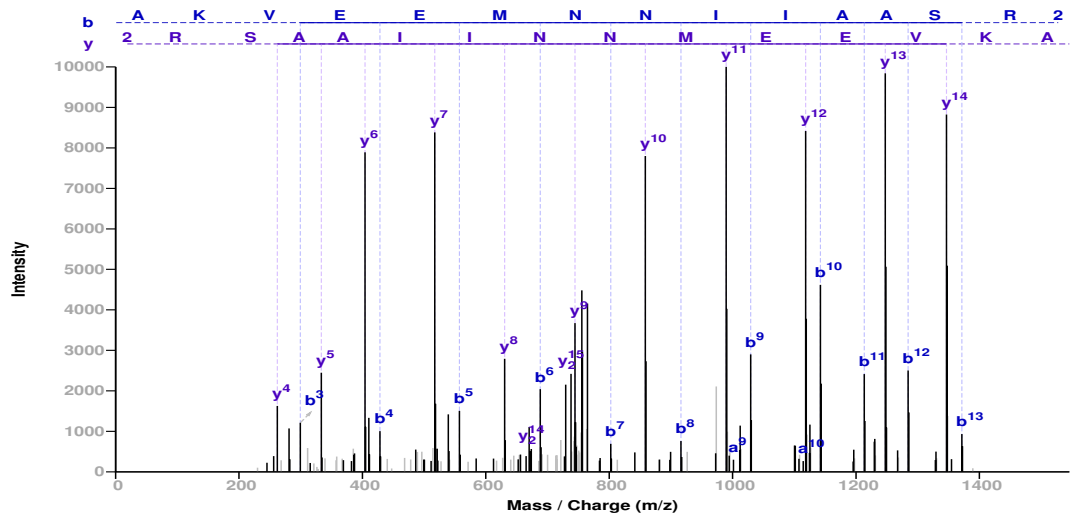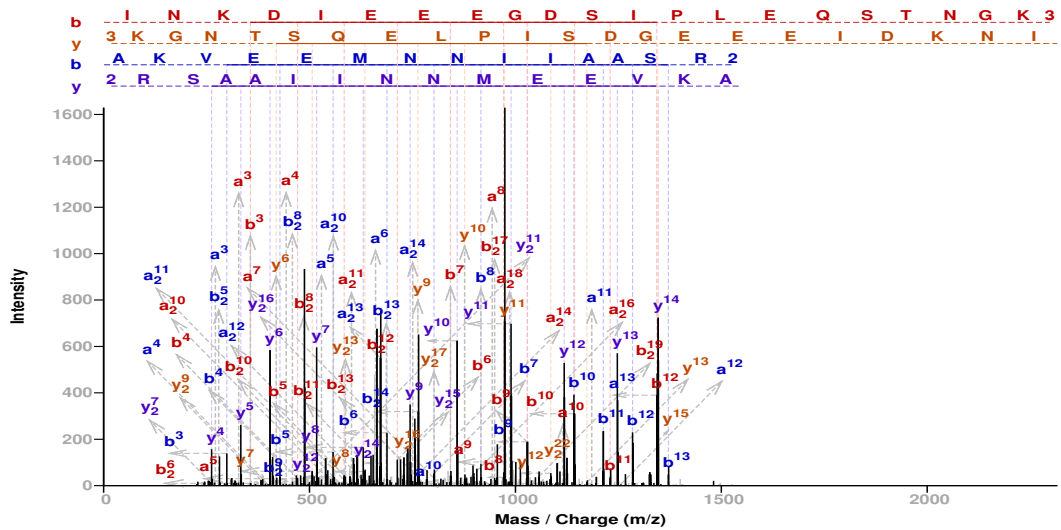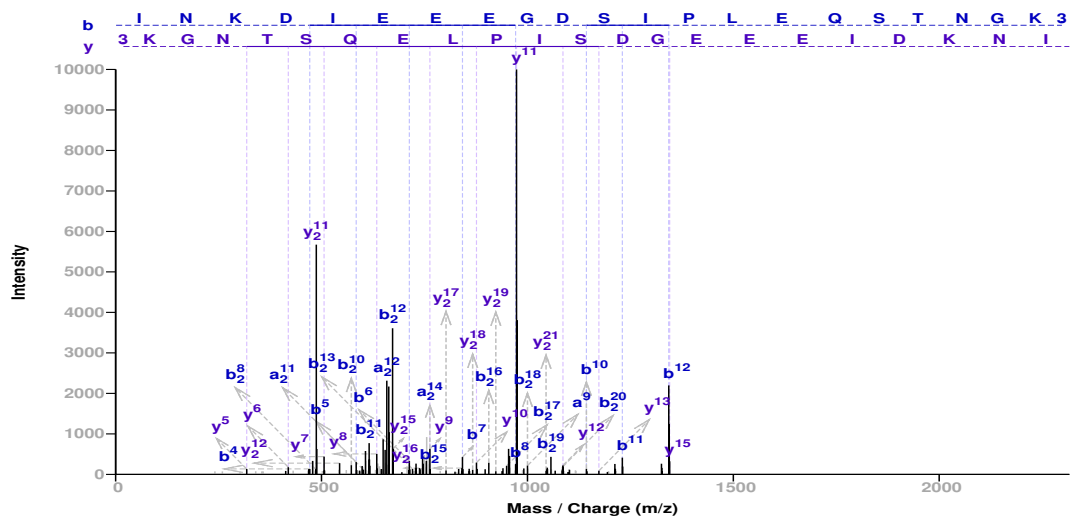

yeast3\_Scan\_Number\_3378 Precursor m/z: 407.221 cosine: 0.765  $\alpha$ : 0.907

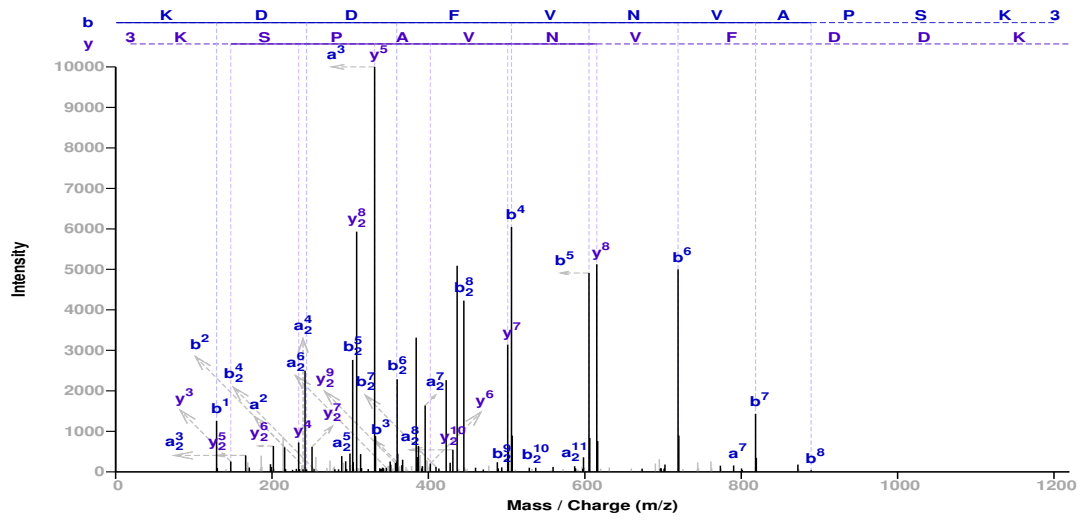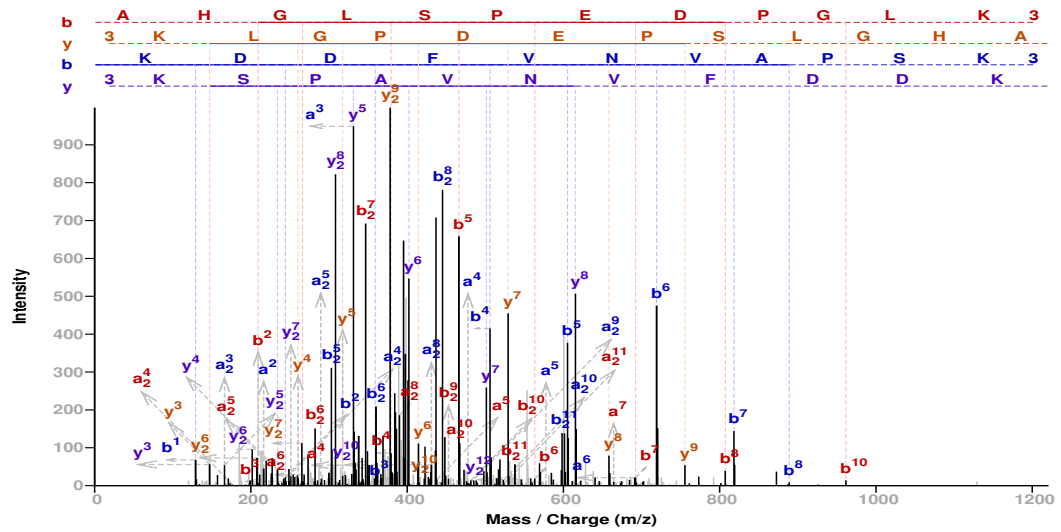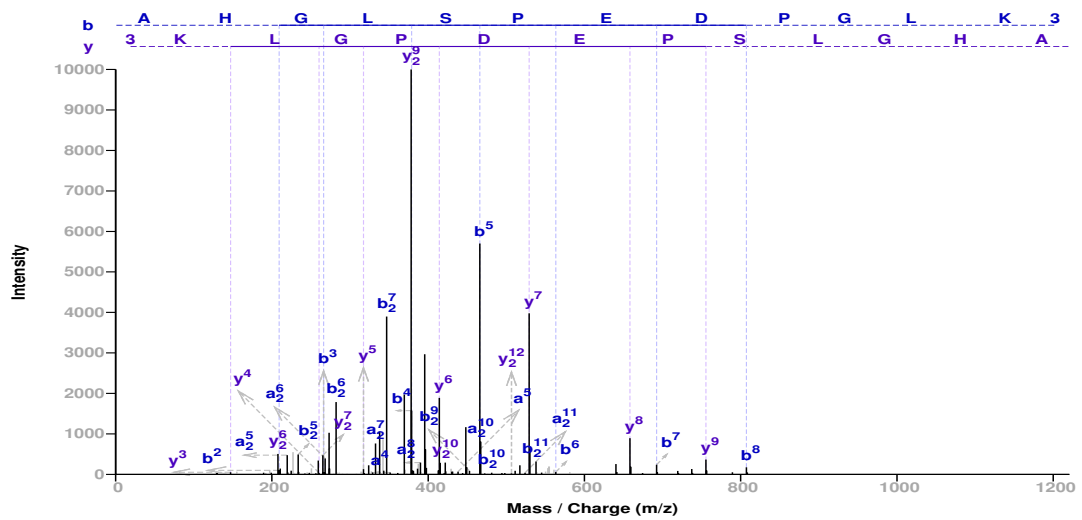

yeast3.Scan\_Number\_2241 Precursor m/z: 463.248 cosine: 0.750  $\alpha$ : 0.901

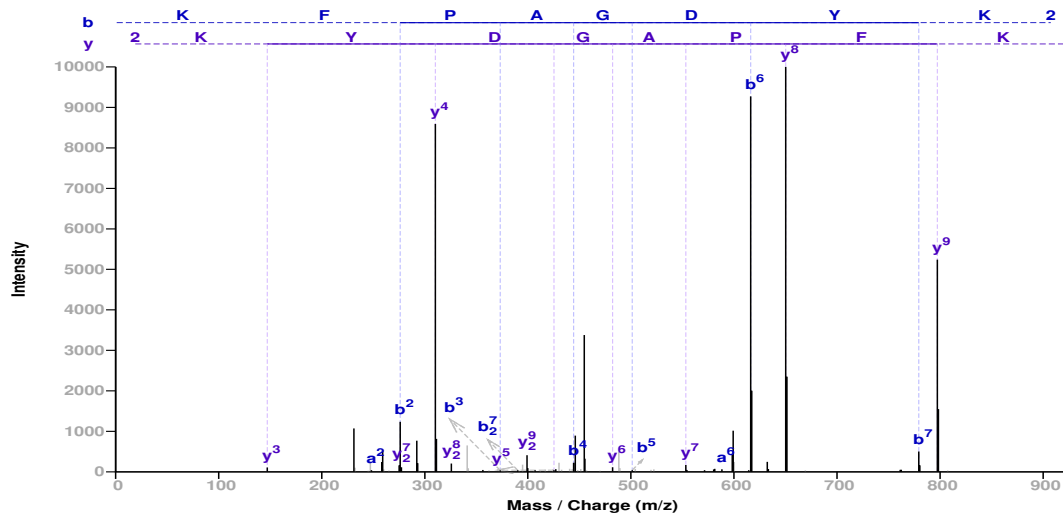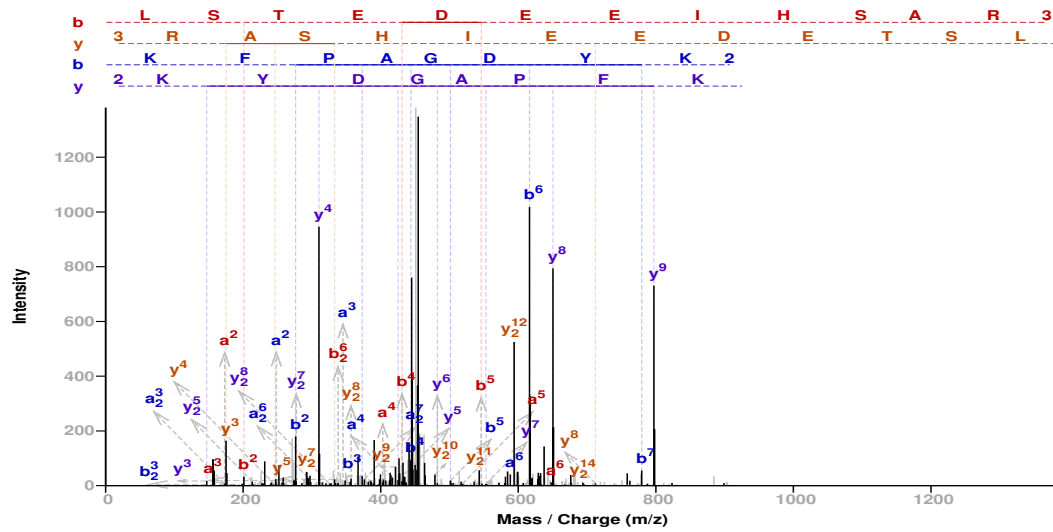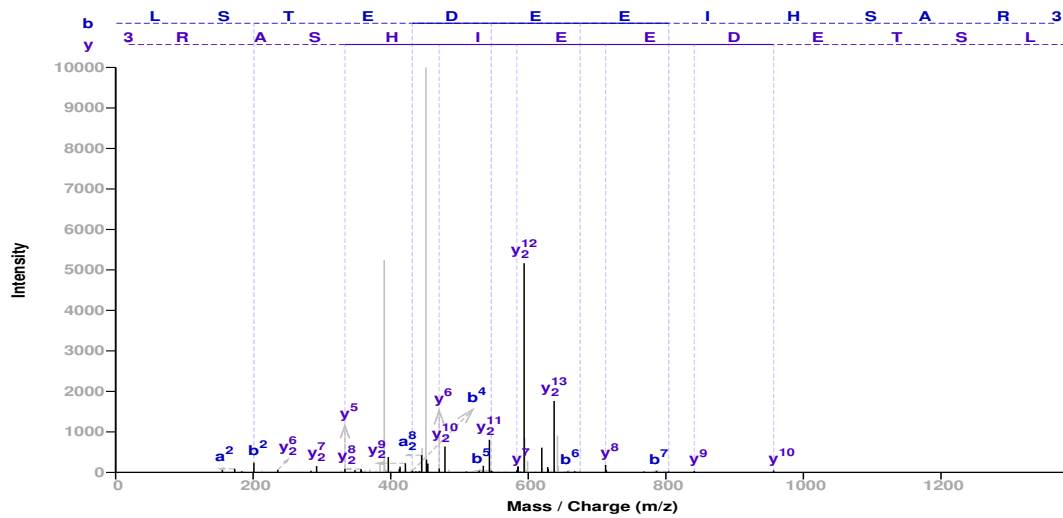

yeast3\_Scan\_Number\_5071 Precursor m/z: 650.846 cosine: 0.774  $\alpha$ : 0.888

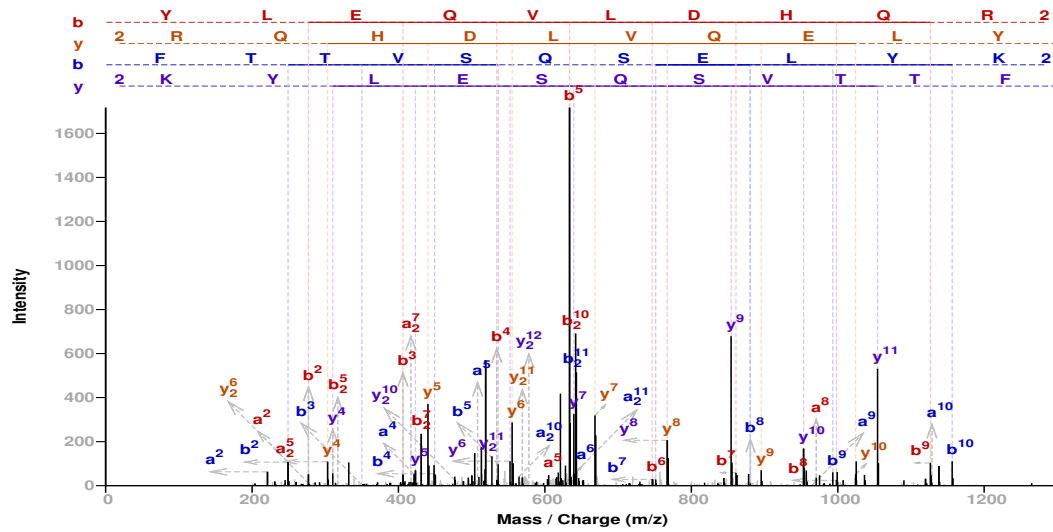

yeast3\_Scan\_Number\_2946 Precursor m/z: 501.801 cosine: 0.760  $\alpha$ : 0.881

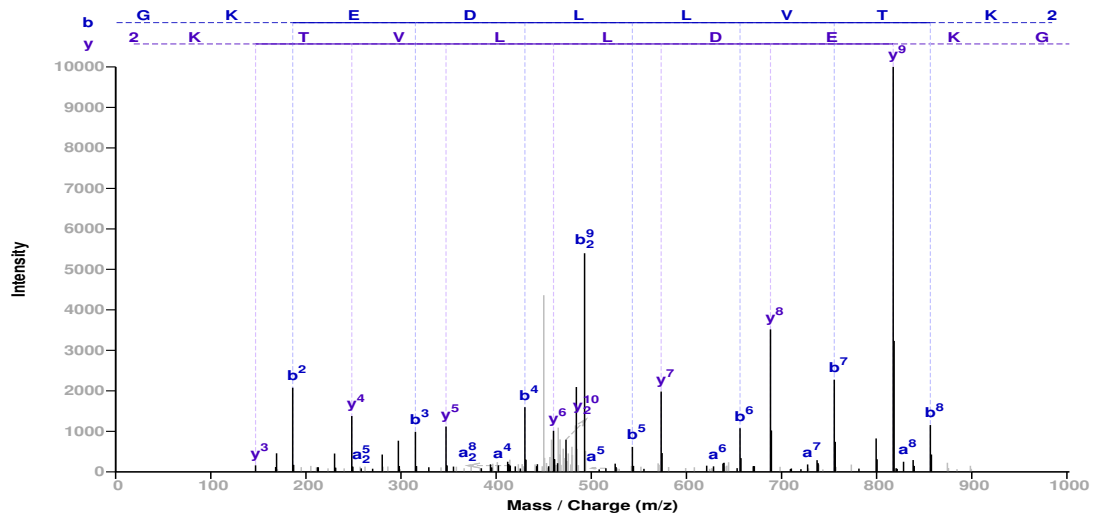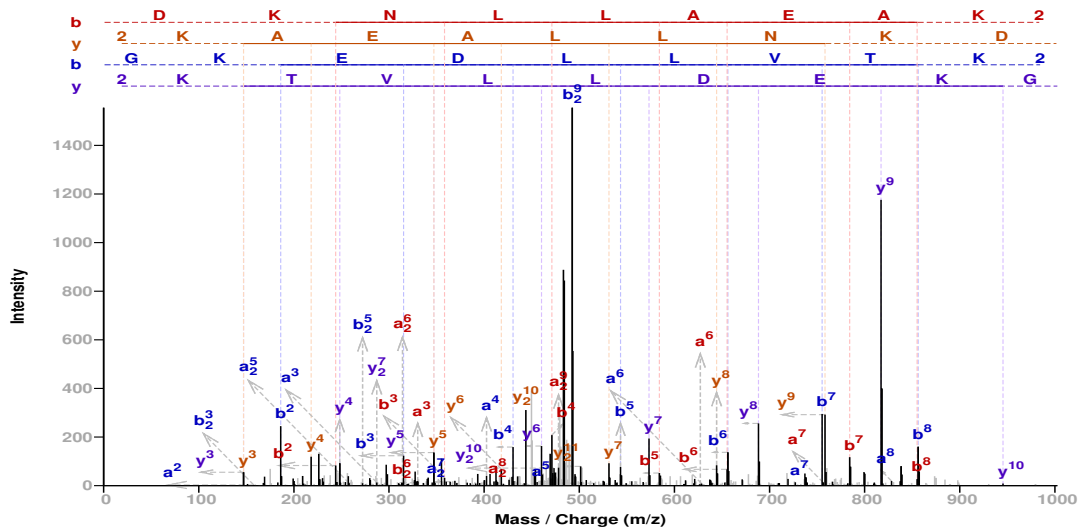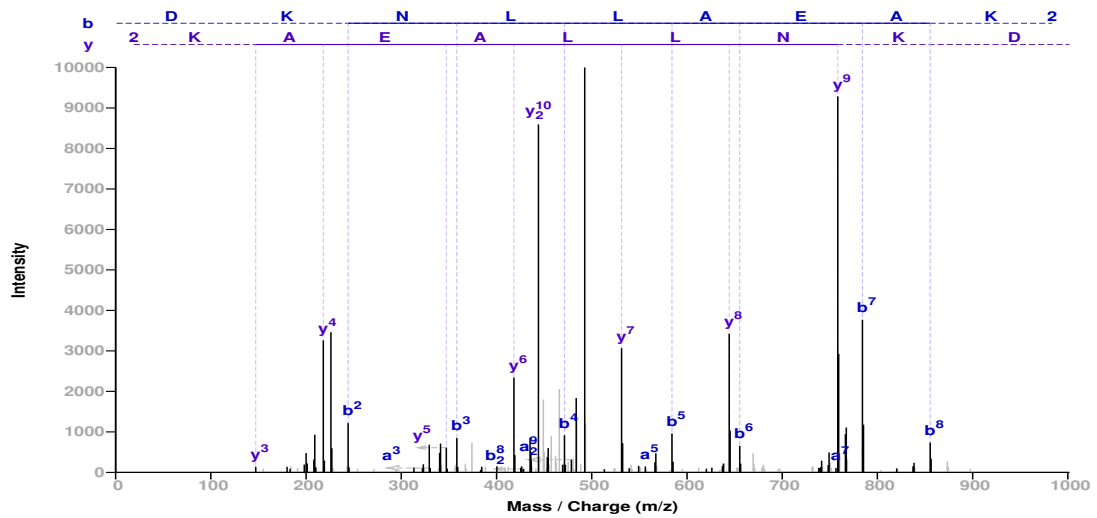

yeast3\_Scan\_Number.1621 Precursor m/z: 365.221 cosine: 0.751  $\alpha$ : 0.863

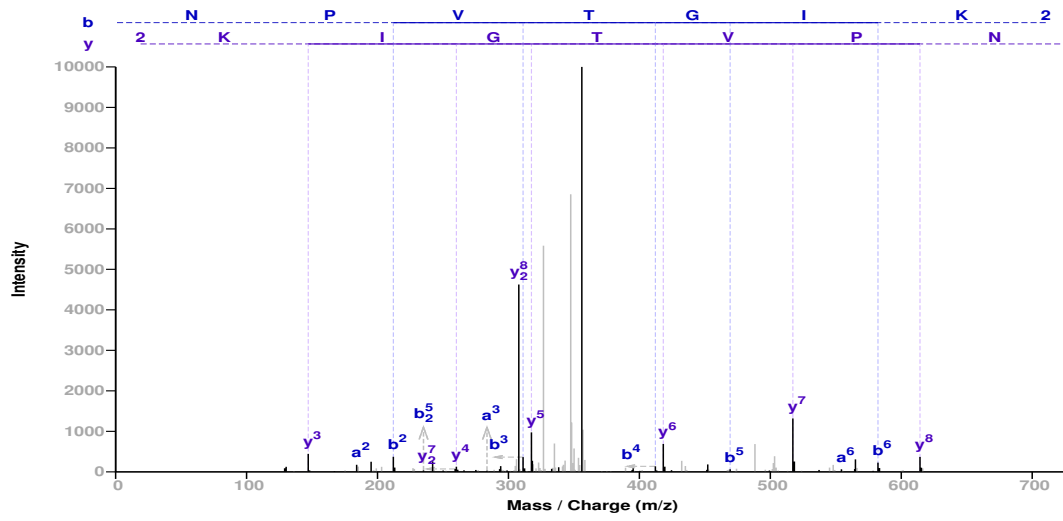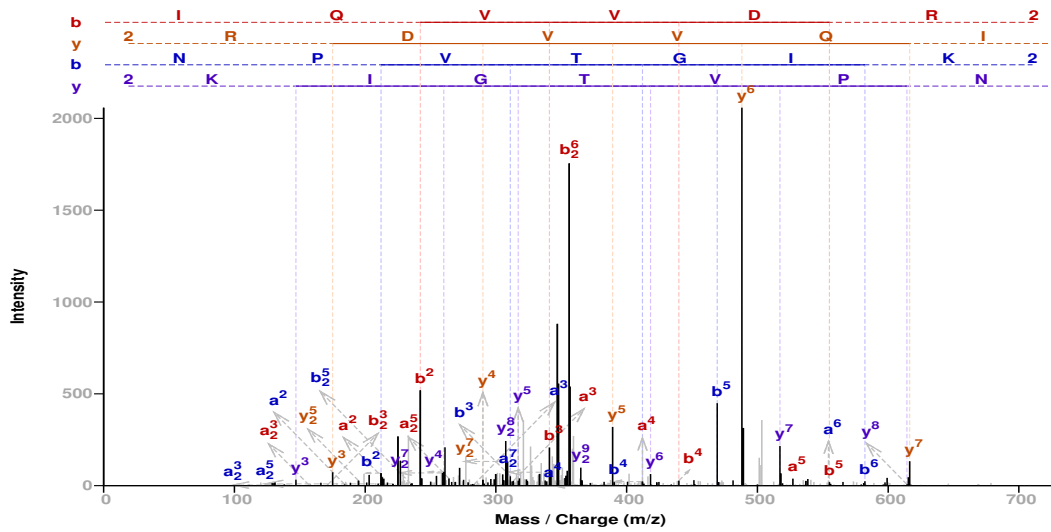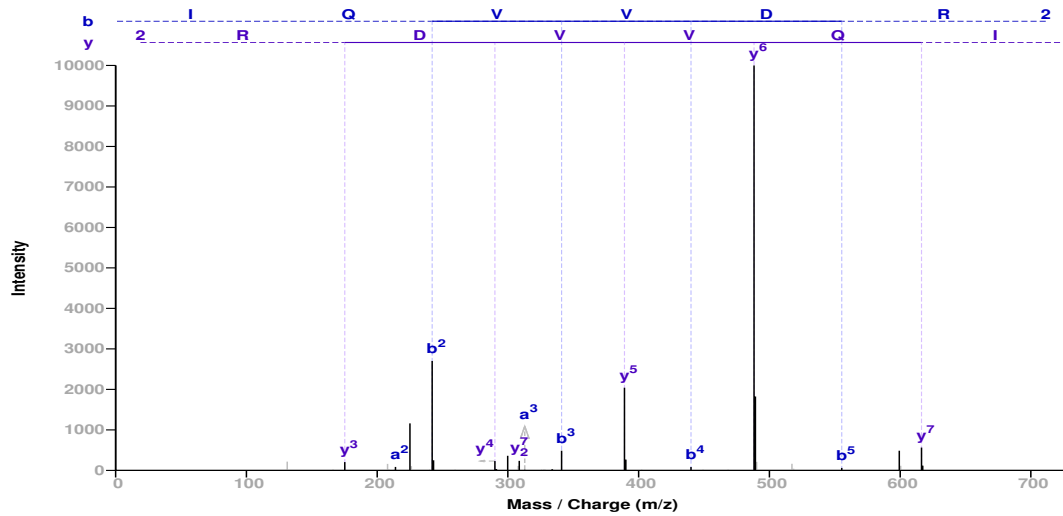

yeast3\_Scan\_Number\_6016 Precursor m/z: 471.293 cosine: 0.895  $\alpha$ : 0.854

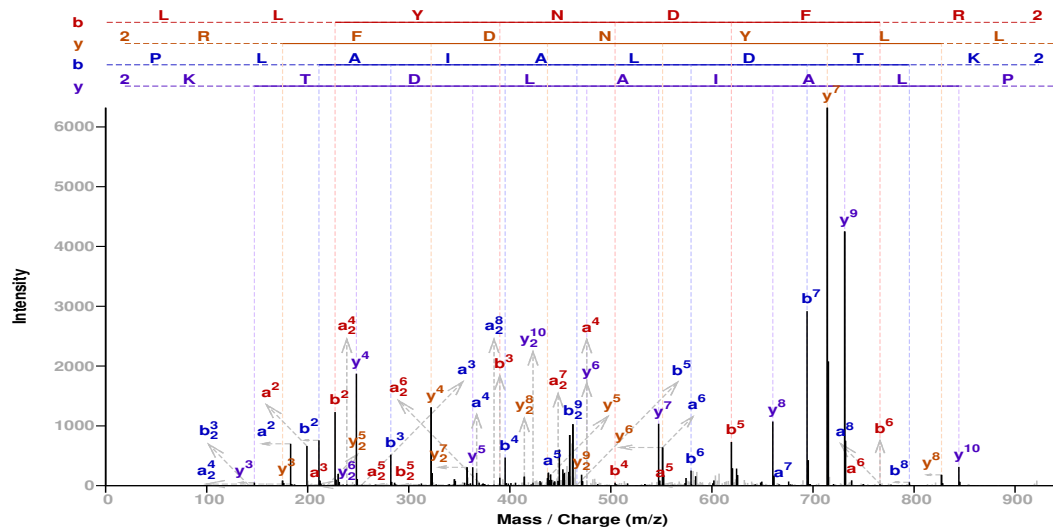





yeast3\_Scan\_Number\_3432 Precursor m/z: 557.310 cosine: 0.751  $\alpha$ : 0.843

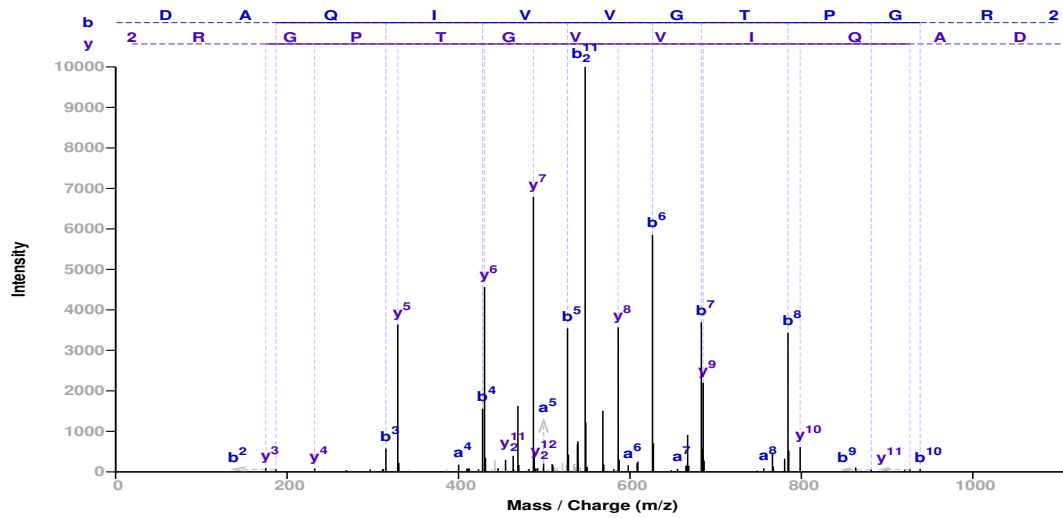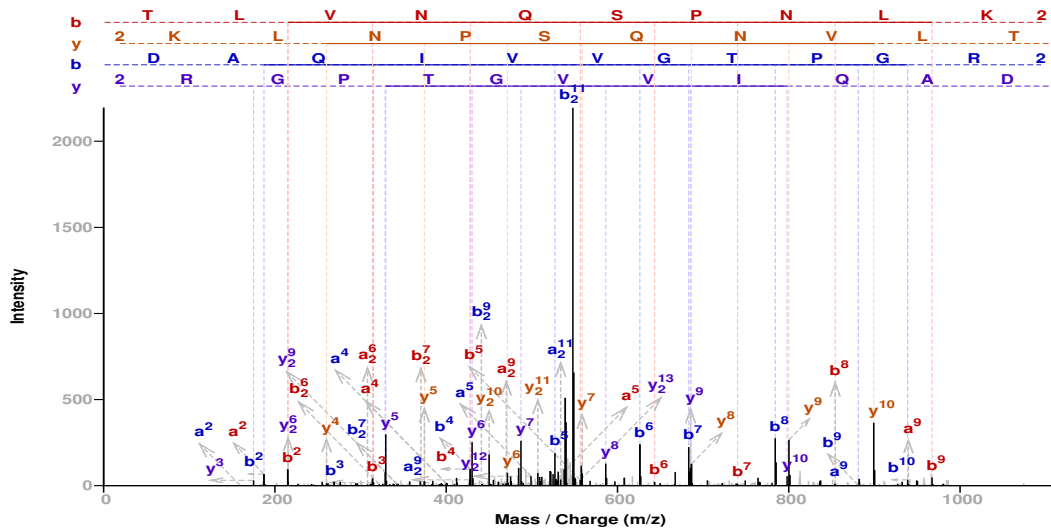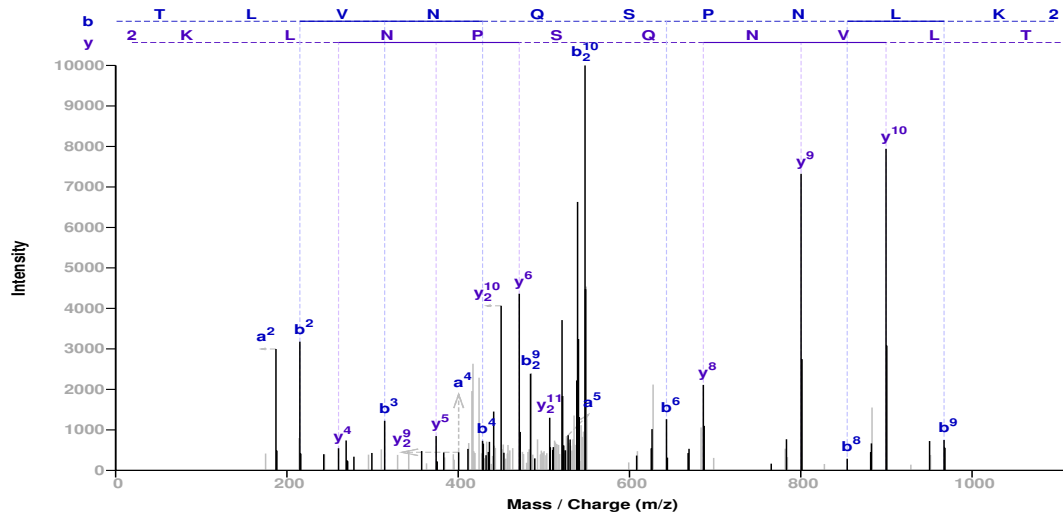

yeast3\_Scan\_Number\_5398 Precursor m/z: 623.337 cosine: 0.765  $\alpha$ : 0.839

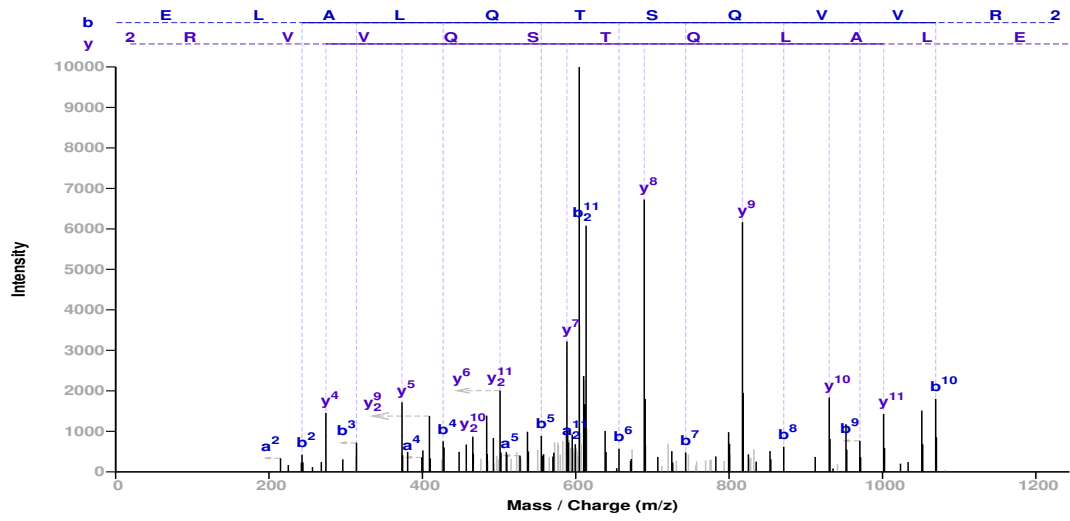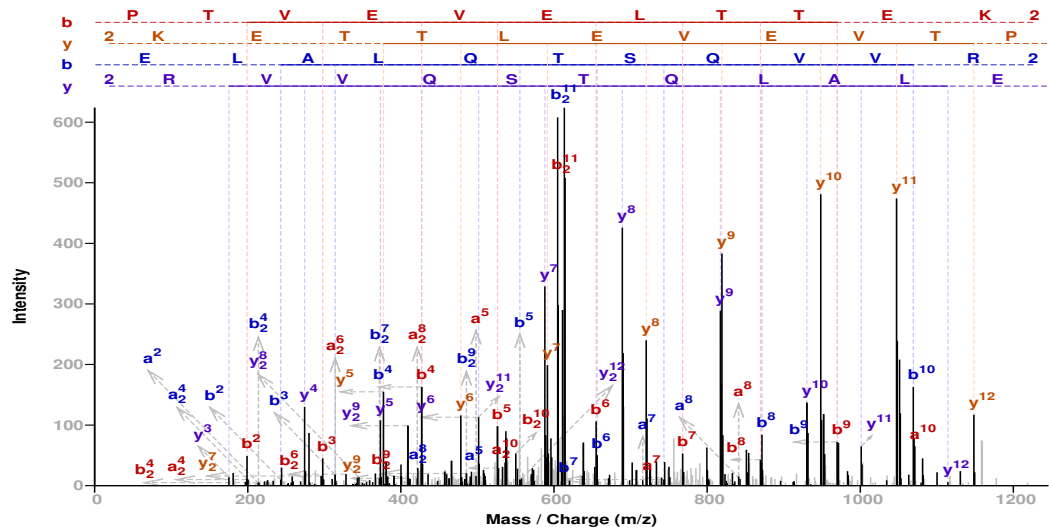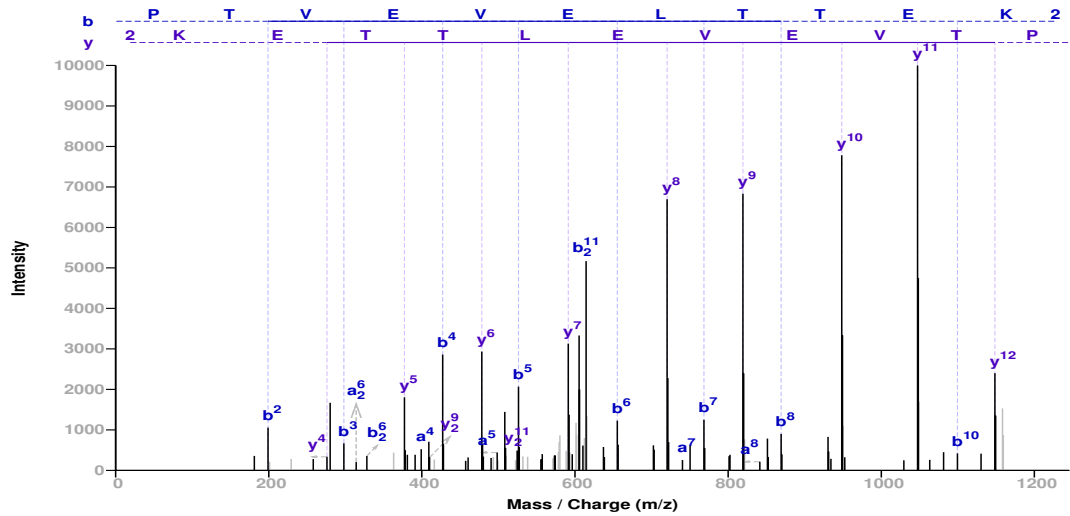

yeast3\_Scan\_Number\_7161 Precursor m/z: 628.872 cosine: 0.758  $\alpha$ : 0.819

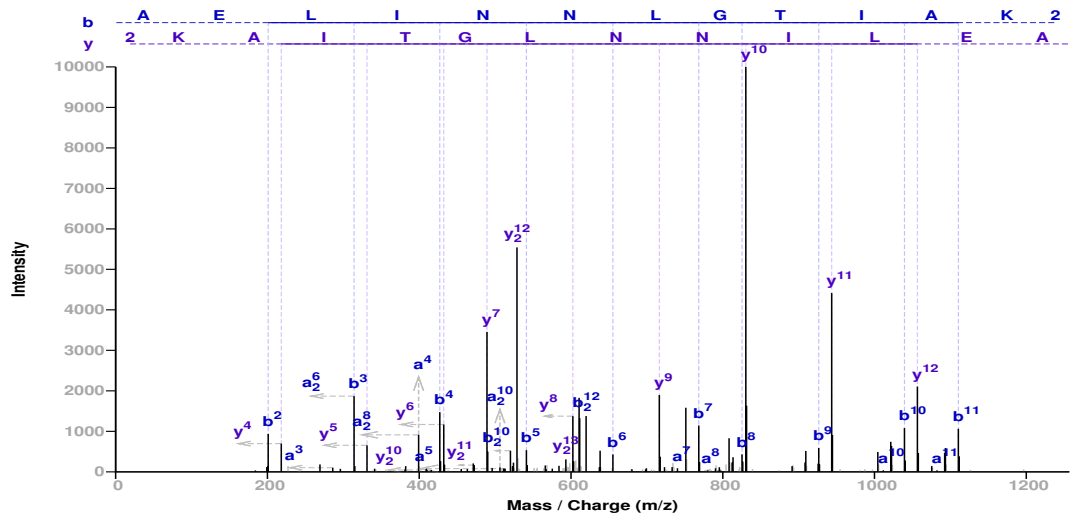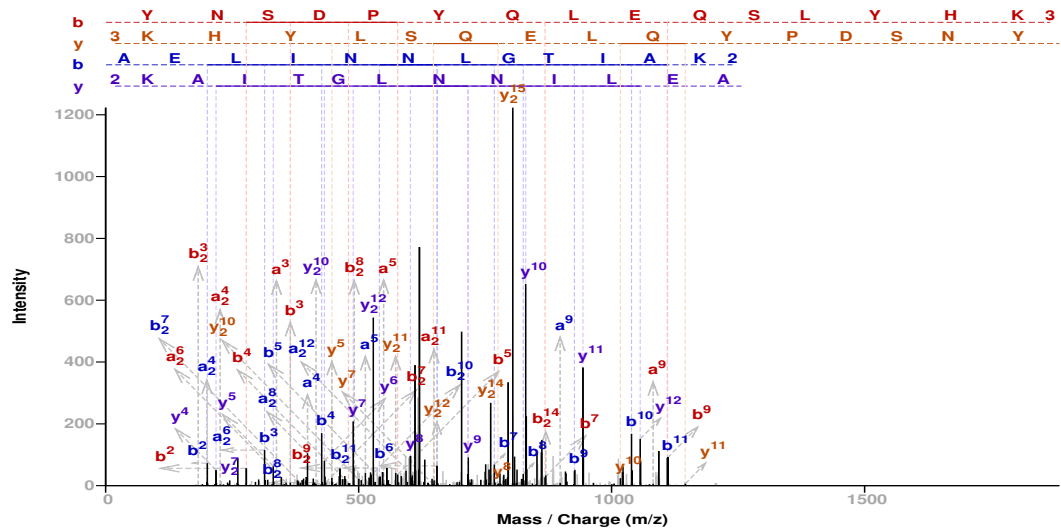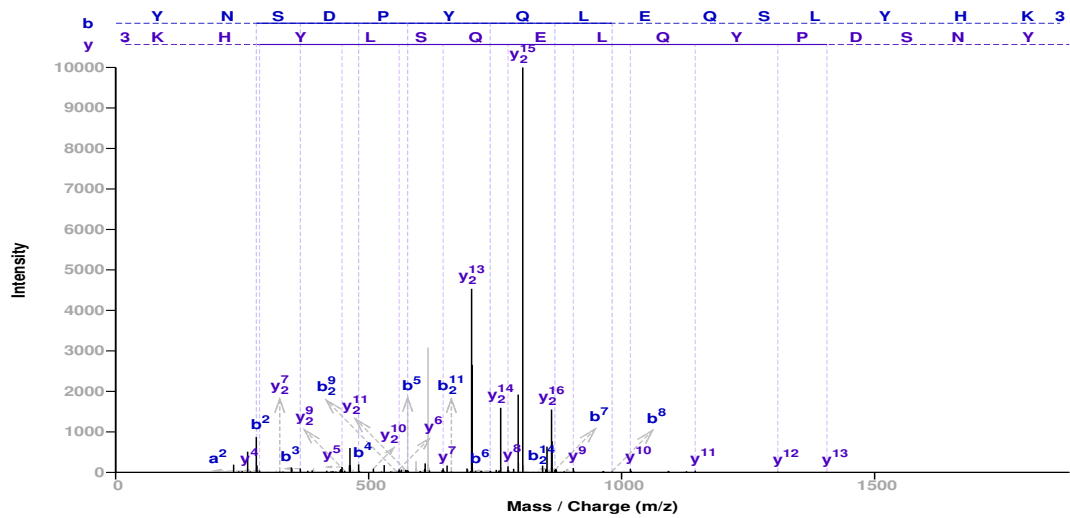

yeast3.Scan\_Number\_3192 Precursor m/z: 641.327 cosine: 0.780  $\alpha$ : 0.811

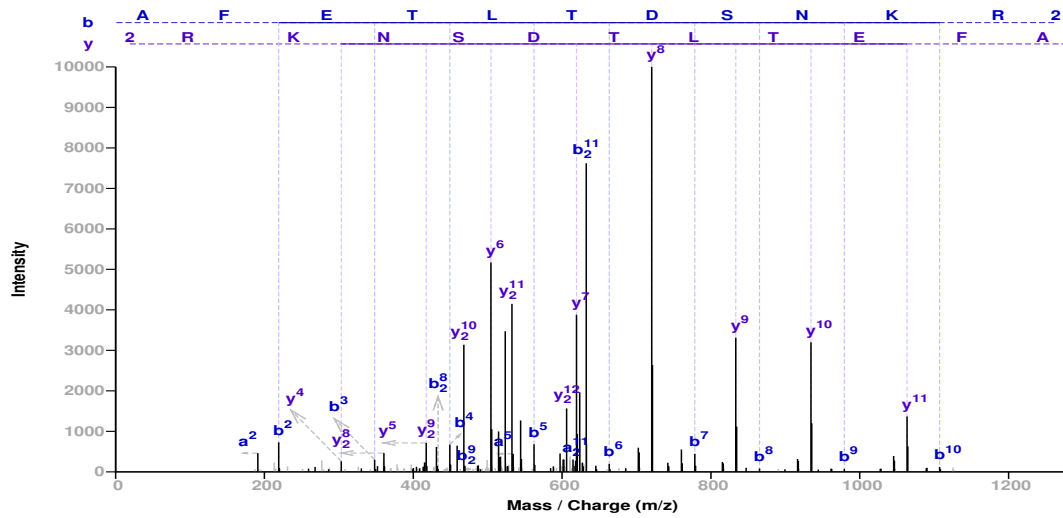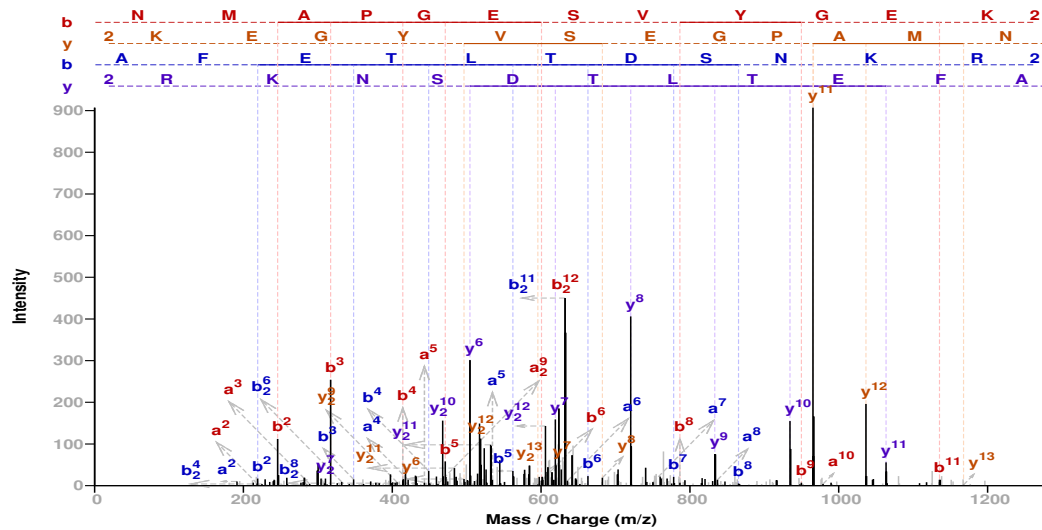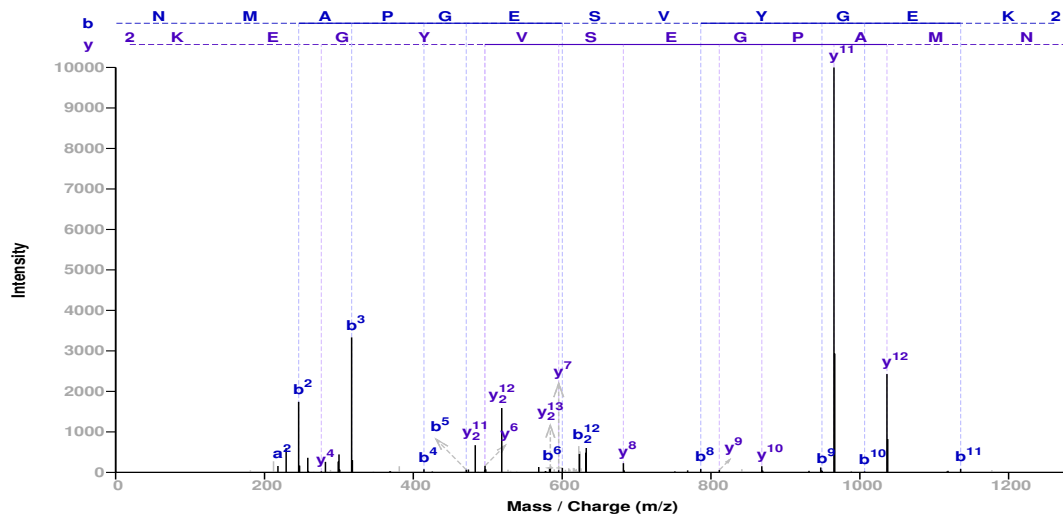

yeast3\_Scan\_Number\_5645 Precursor m/z: 664.832 cosine: 0.745  $\alpha$ : 0.802

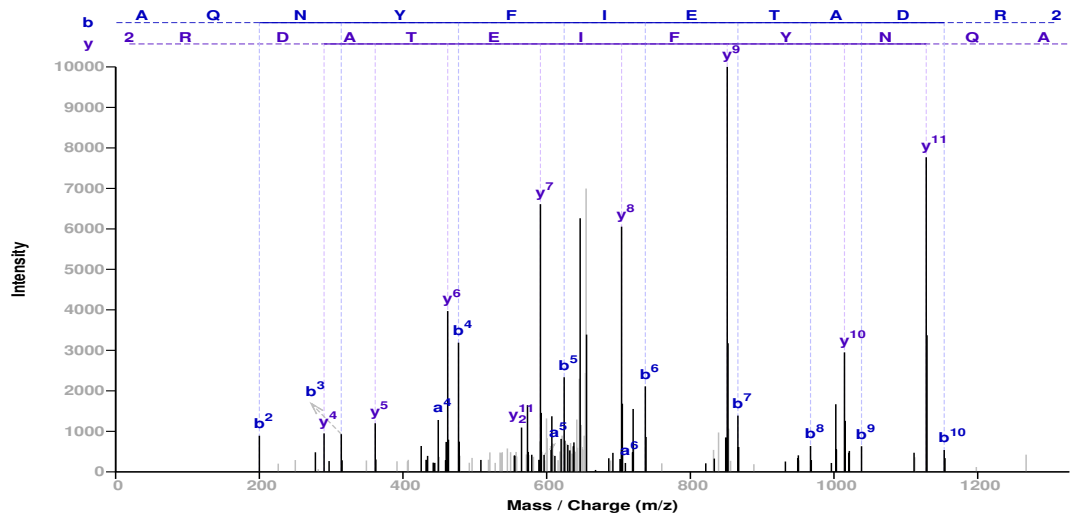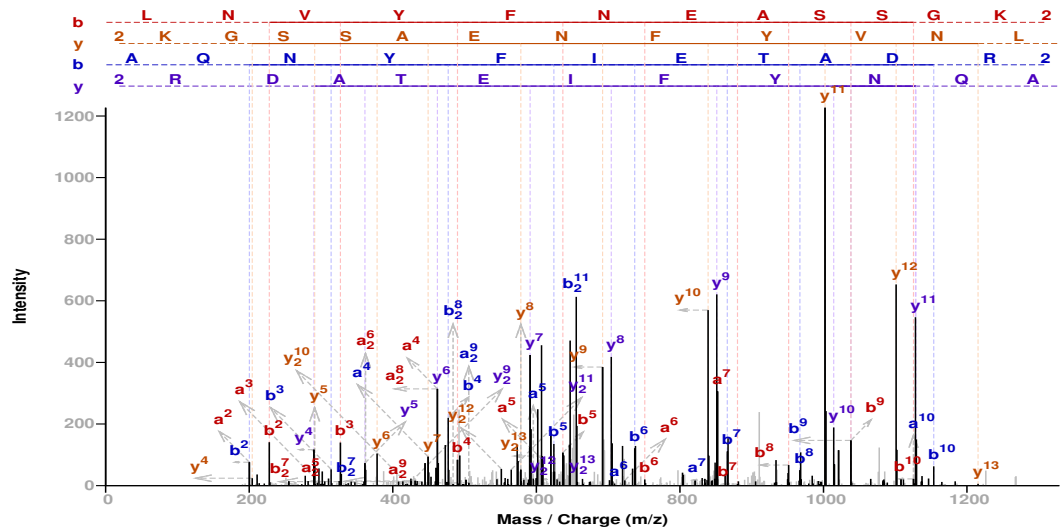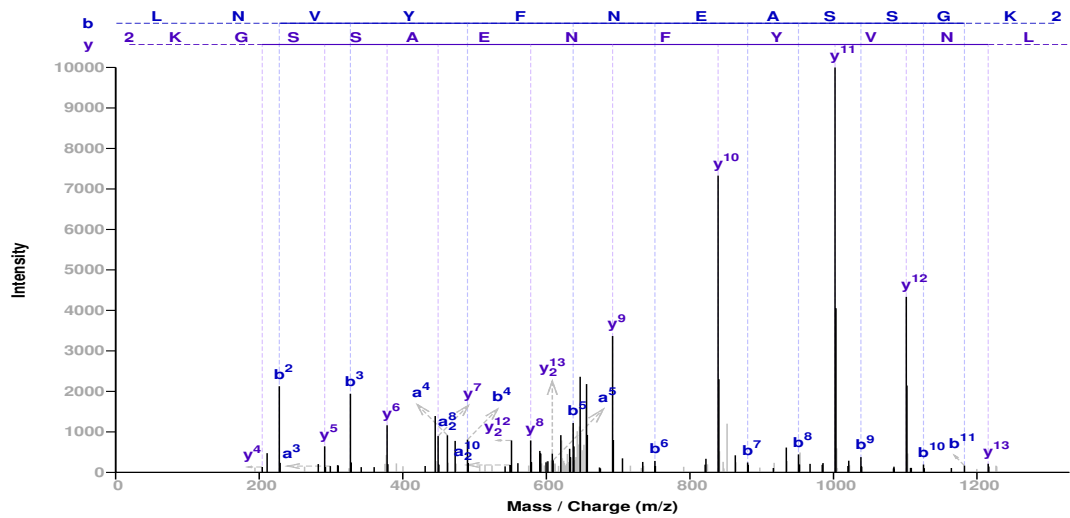

yeast3.Scan\_Number.1168 Precursor m/z: 441.750 cosine: 0.790  $\alpha$ : 0.765

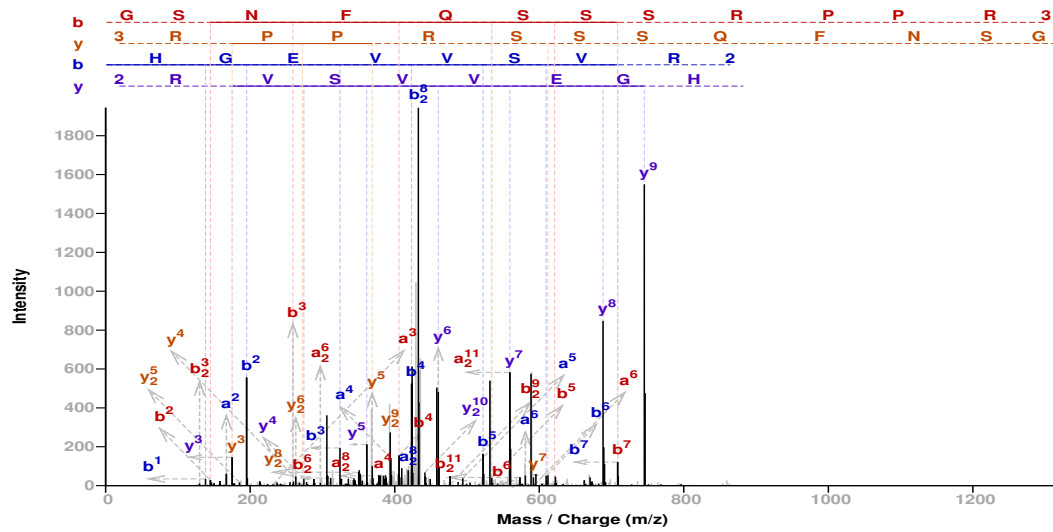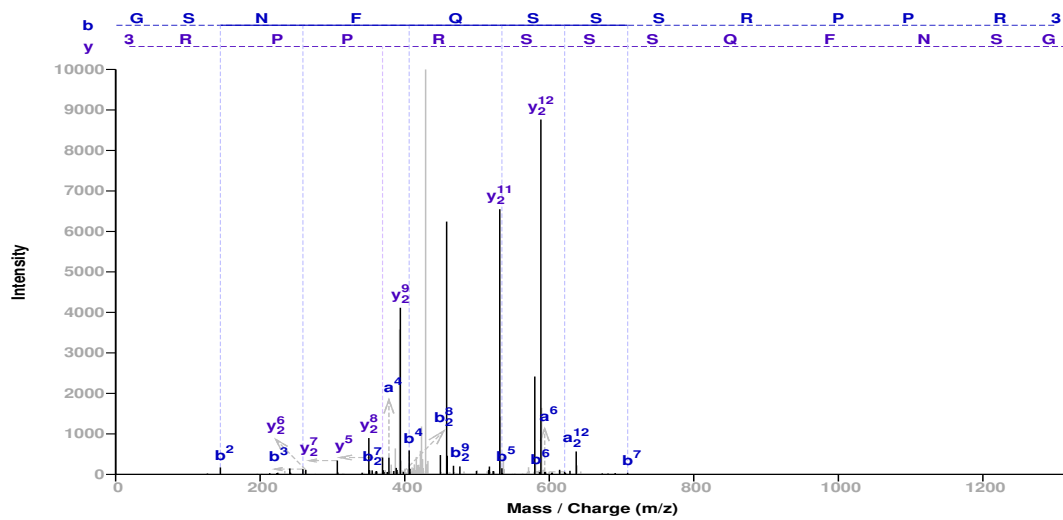

yeast3\_Scan\_Number\_2364 Precursor m/z: 519.747 cosine: 0.833  $\alpha$ : 0.756

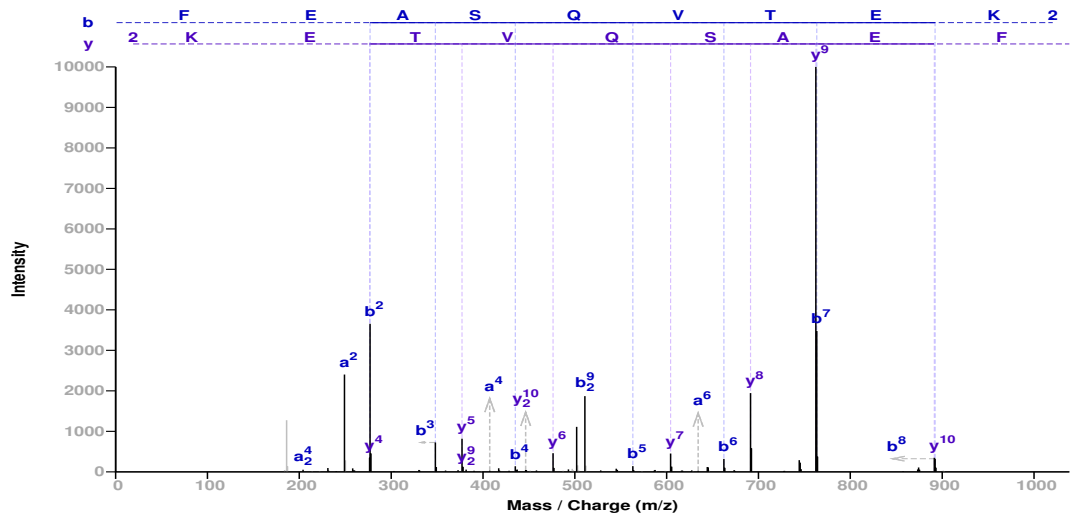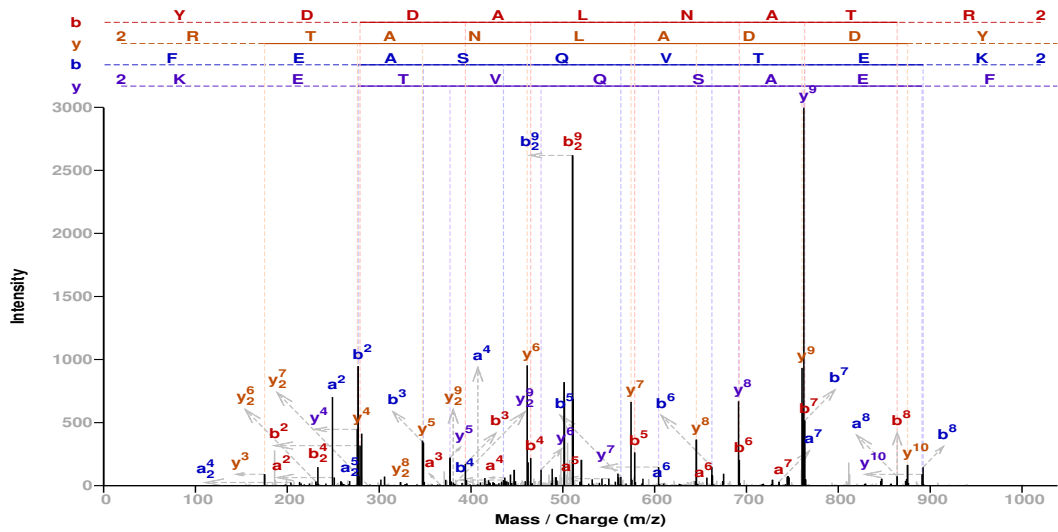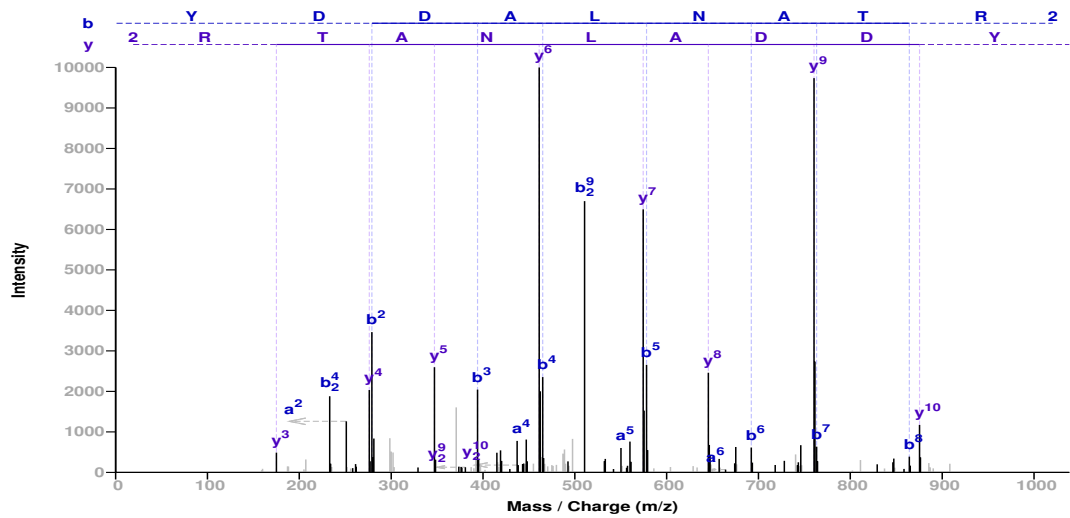

yeast3\_Scan\_Number\_2373 Precursor m/z: 404.229 cosine: 0.780  $\alpha$ : 0.751

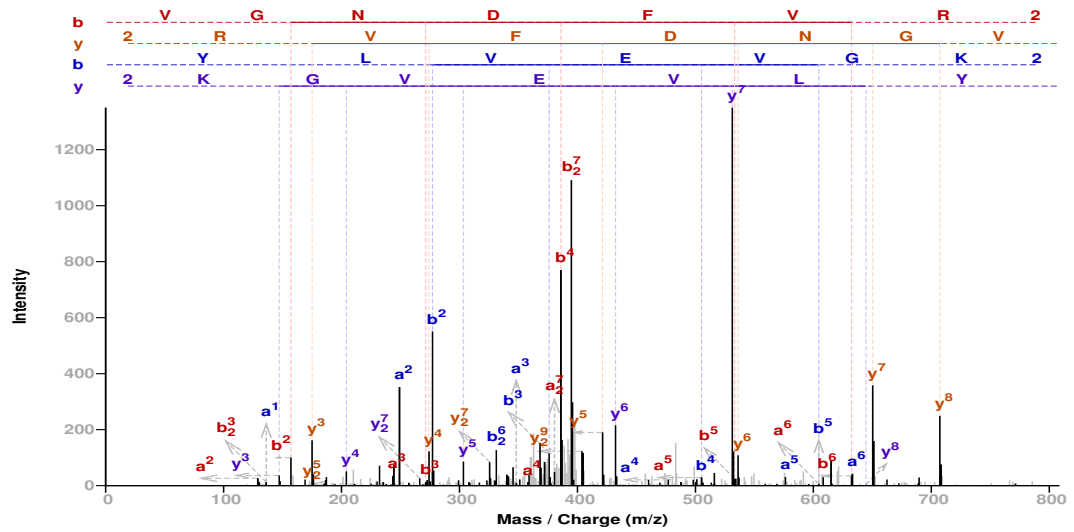



yeast3\_Scan\_Number\_2044 Precursor m/z: 480.749 cosine: 0.823  $\alpha$ : 0.751

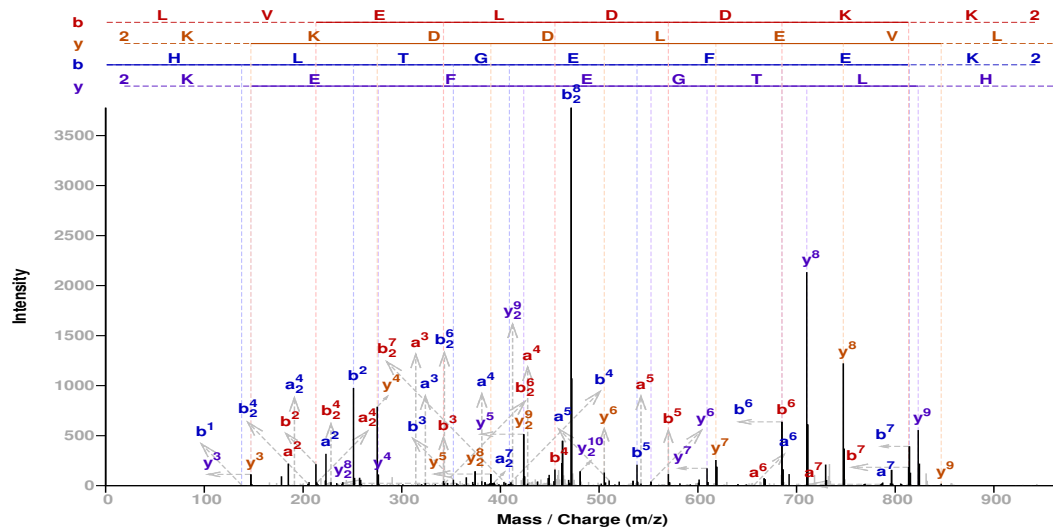

yeast3\_Scan\_Number\_8029 Precursor m/z: 643.879 cosine: 0.782  $\alpha$ : 0.735

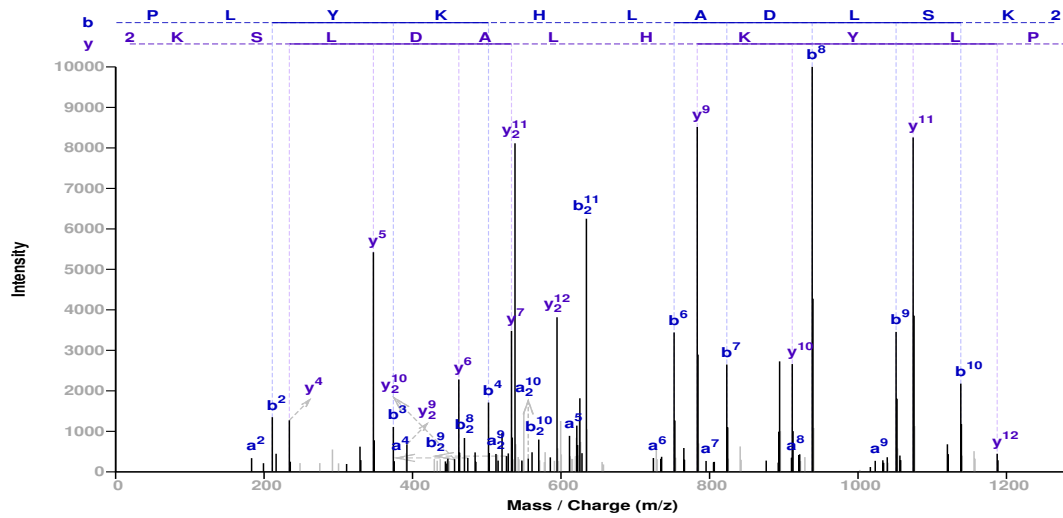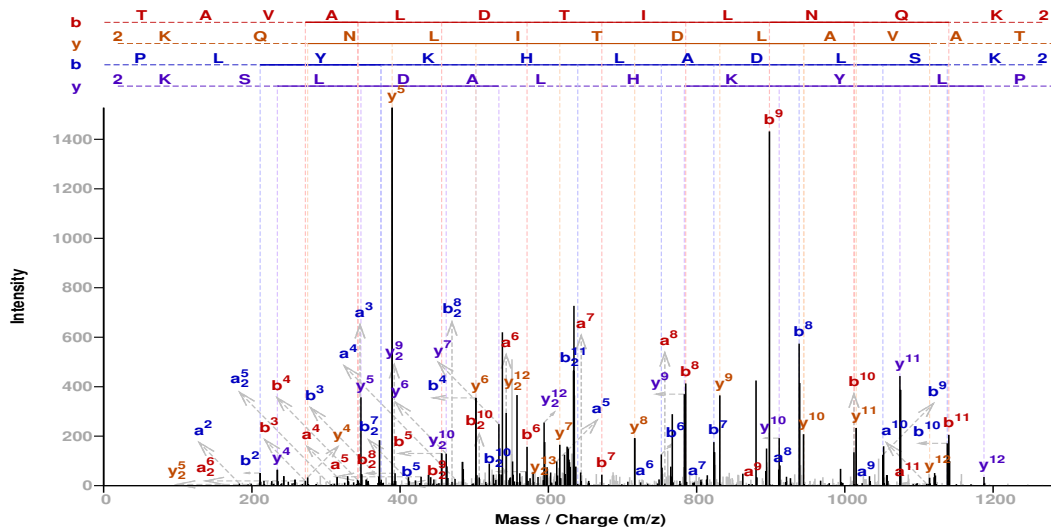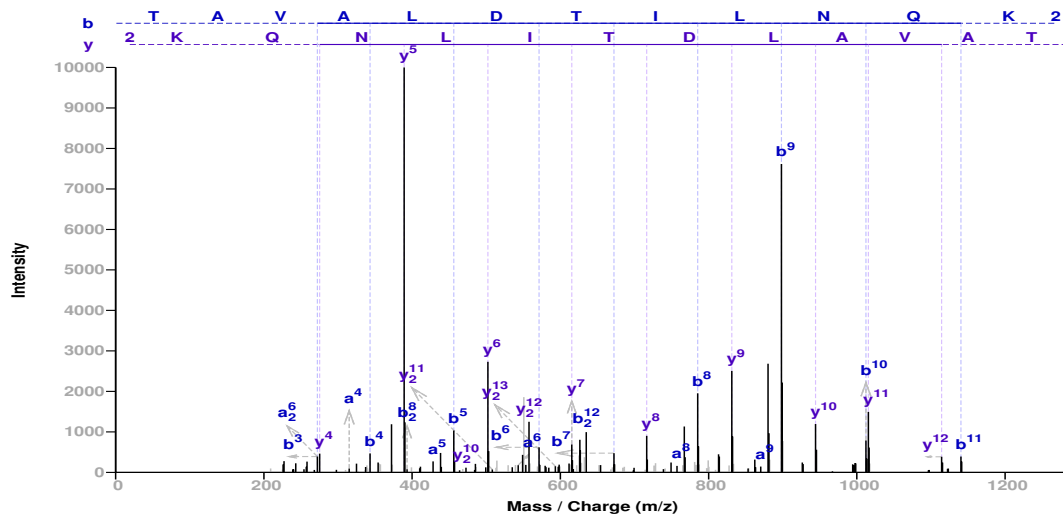

yeast3\_Scan\_Number\_5680 Precursor m/z: 573.336 cosine: 0.811  $\alpha$ : 0.717

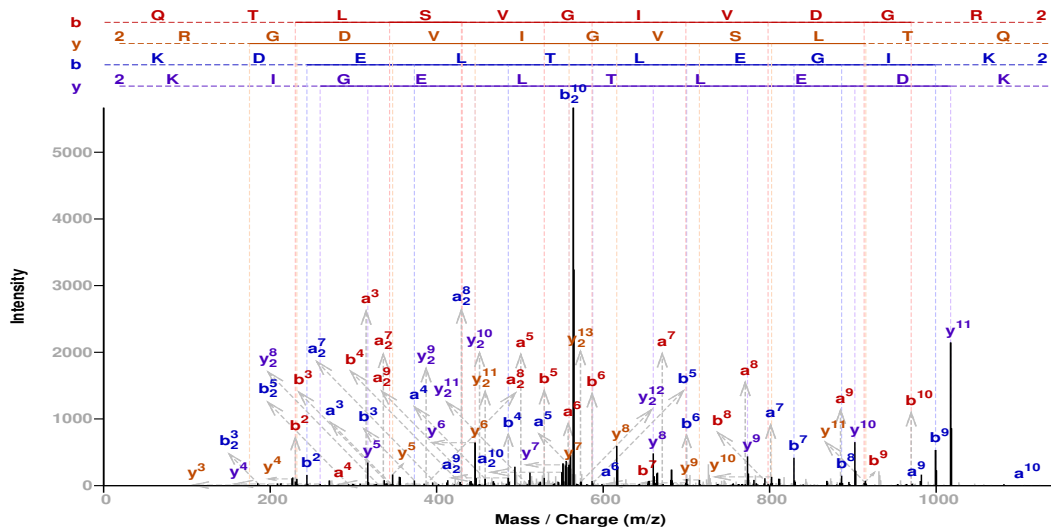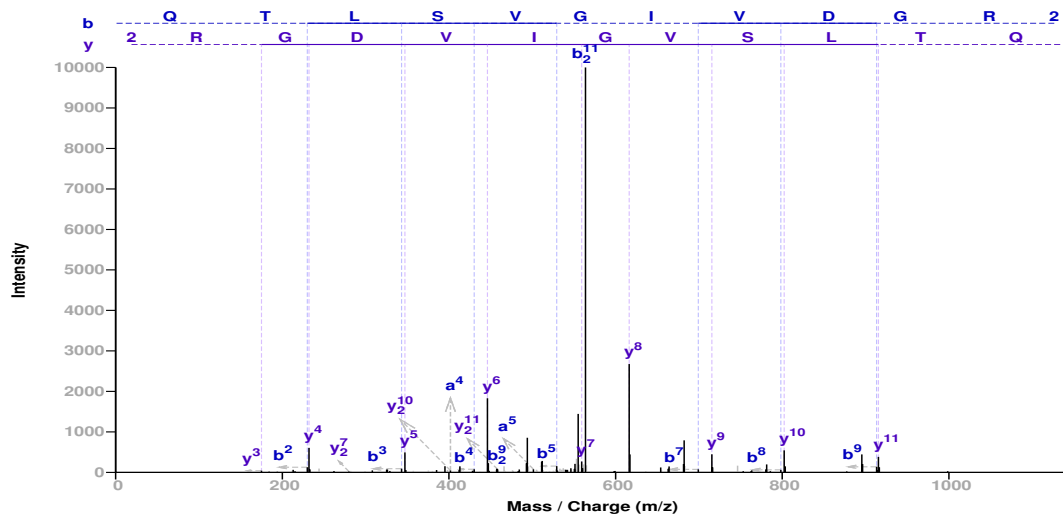

yeast3\_Scan\_Number\_1456 Precursor m/z: 443.762 cosine: 0.728  $\alpha$ : 0.713

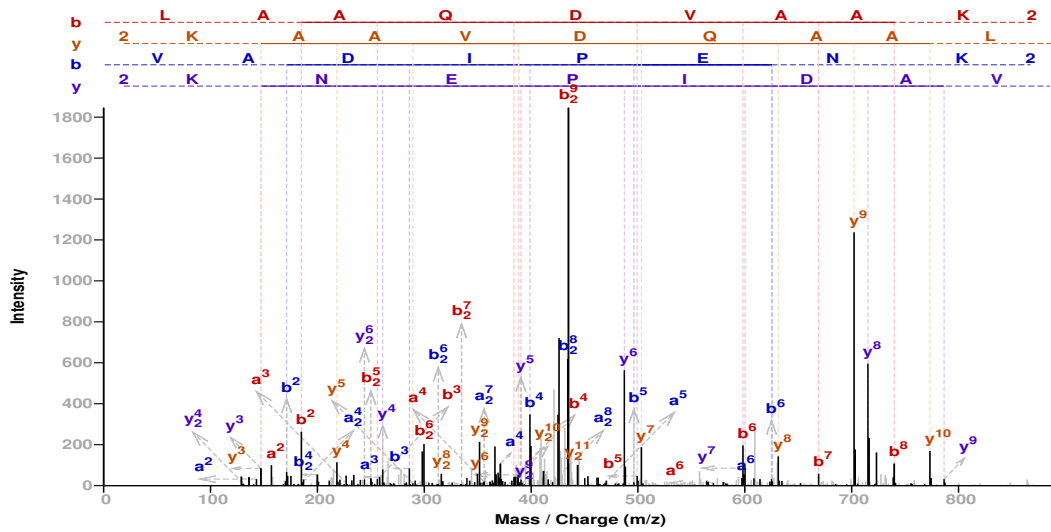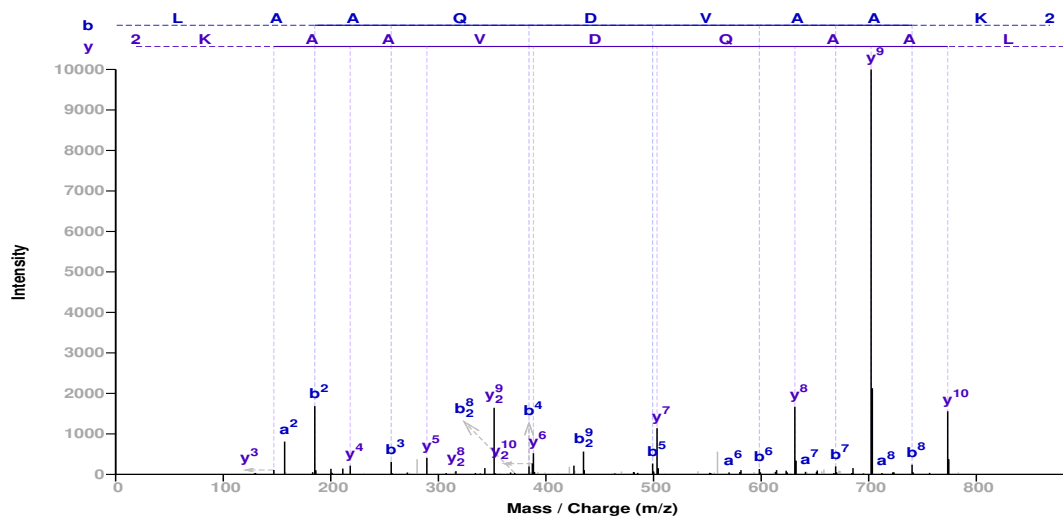



yeast3\_Scan\_Number\_2186 Precursor m/z: 450.768 cosine: 0.743  $\alpha$ : 0.707

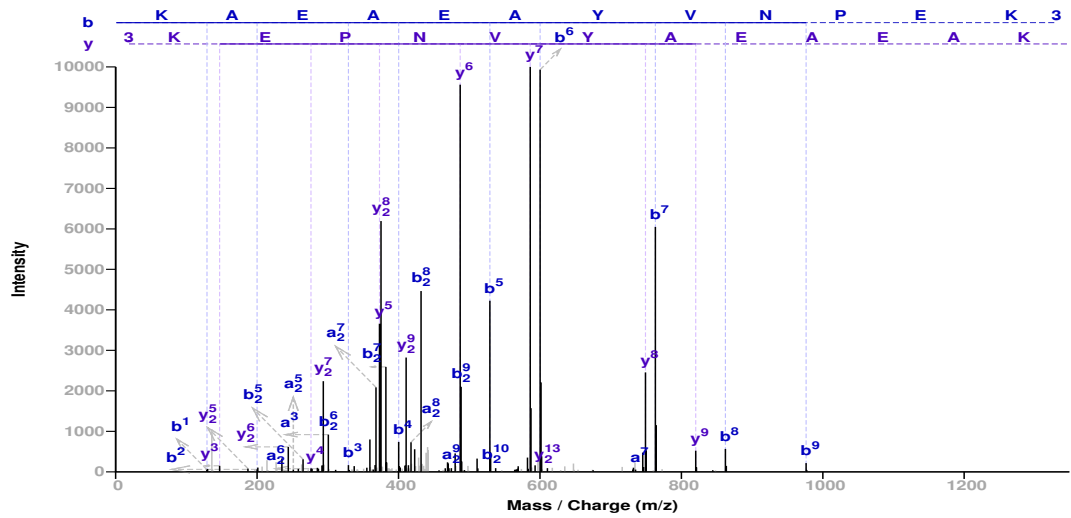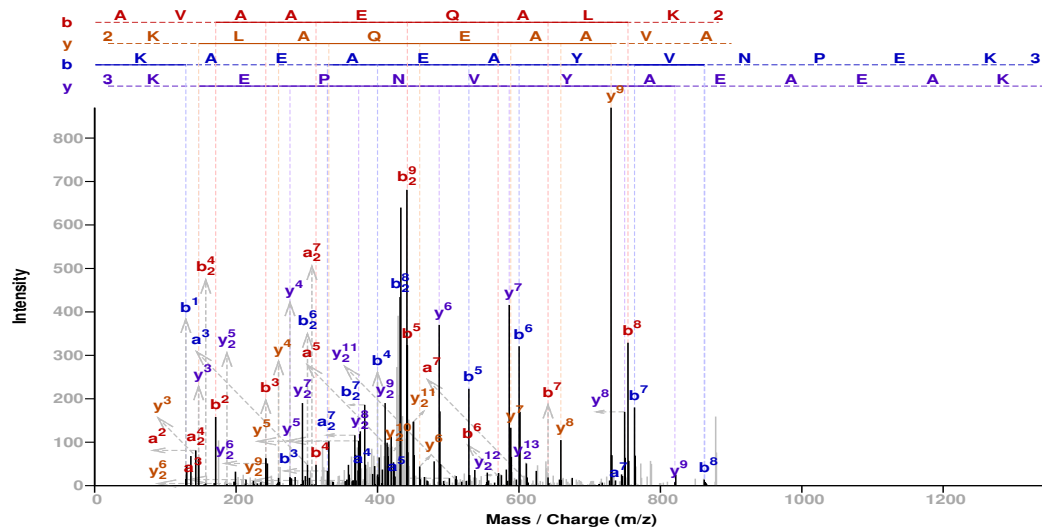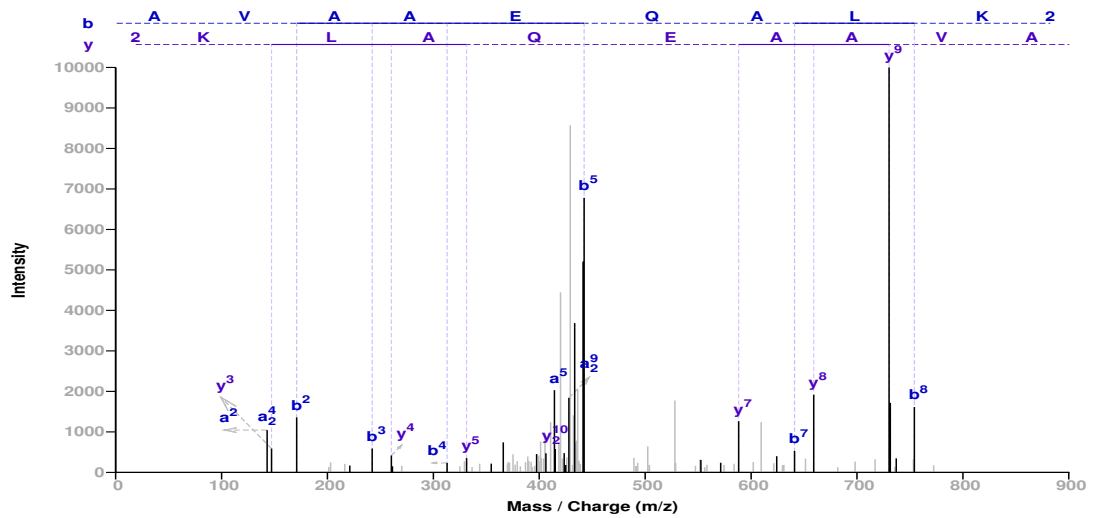

yeast3\_Scan\_Number\_2648 Precursor m/z: 498.276 cosine: 0.826  $\alpha$ : 0.707

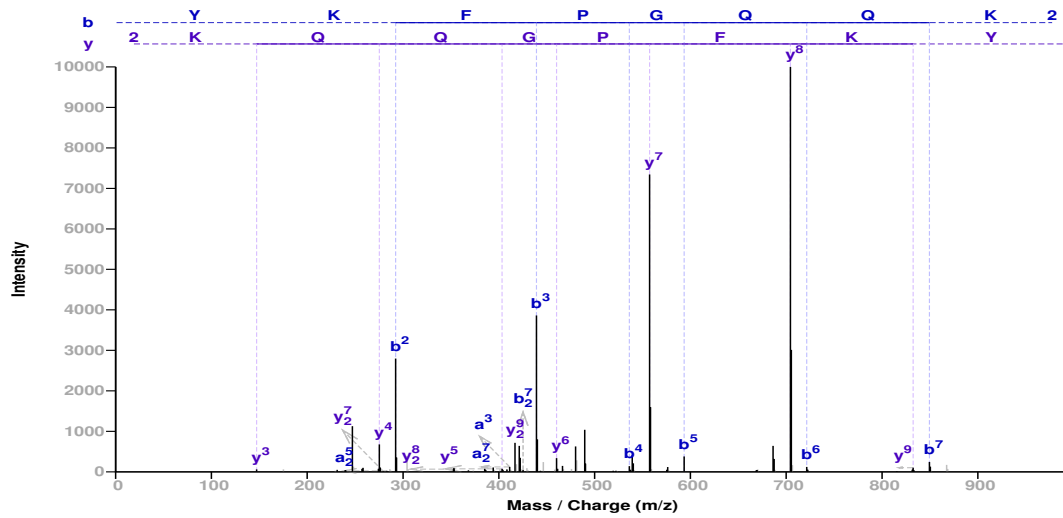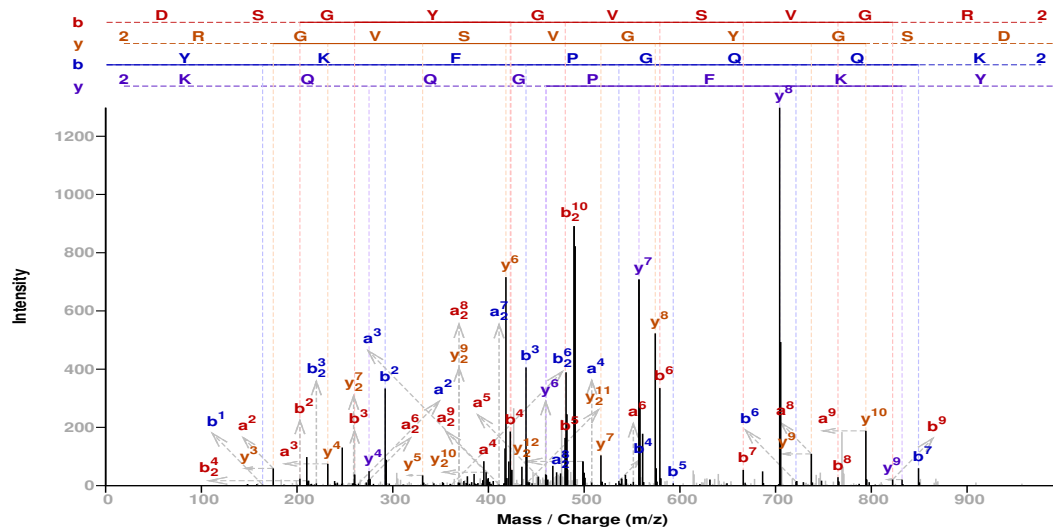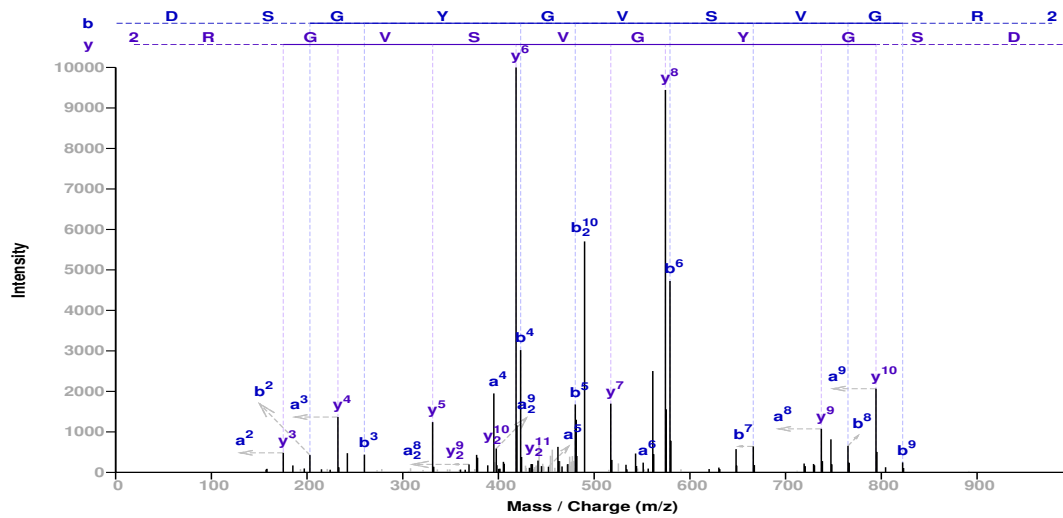





yeast3\_Scan\_Number\_2702 Precursor m/z: 730.838 cosine: 0.794  $\alpha$ : 0.679

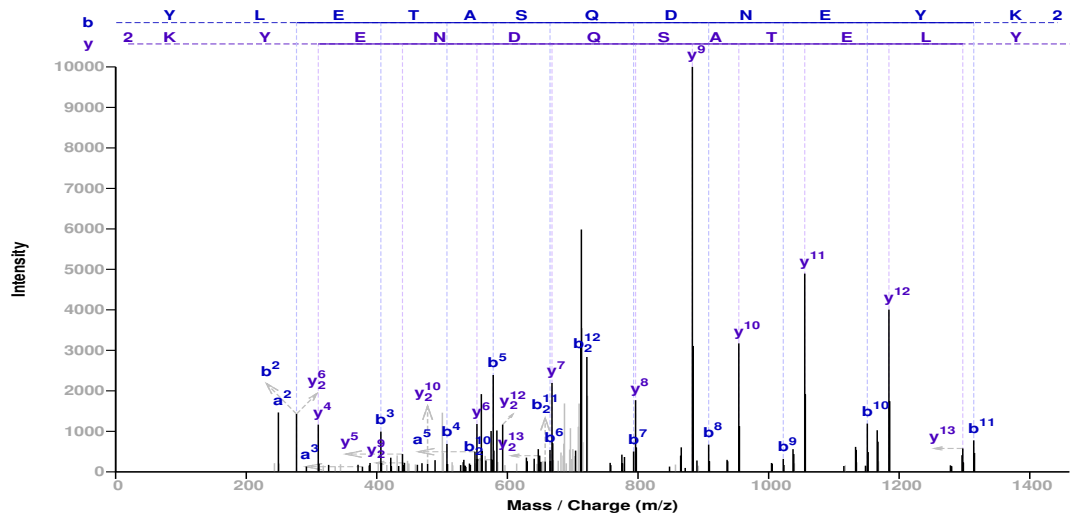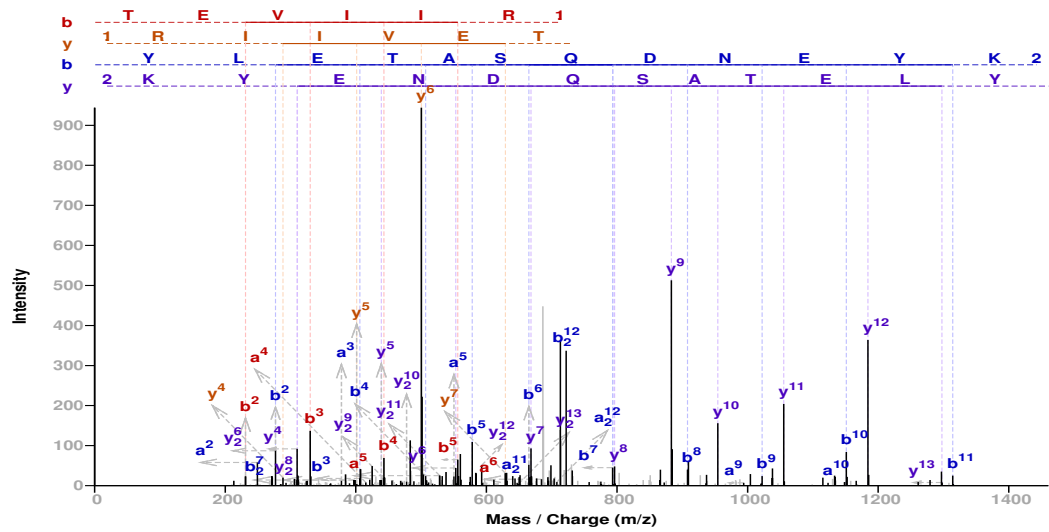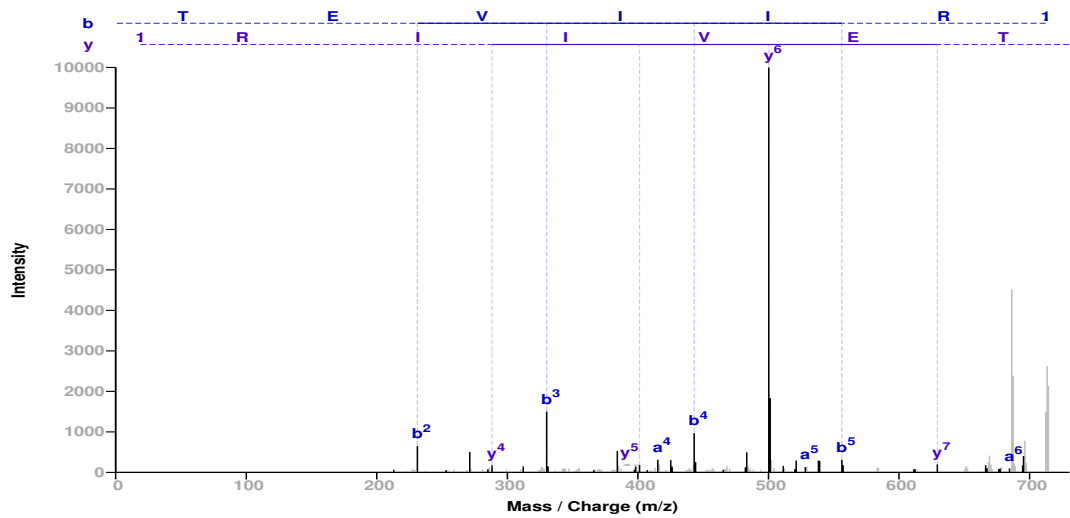

yeast3\_Scan\_Number\_3344 Precursor m/z: 581.270 cosine: 0.864  $\alpha$ : 0.678

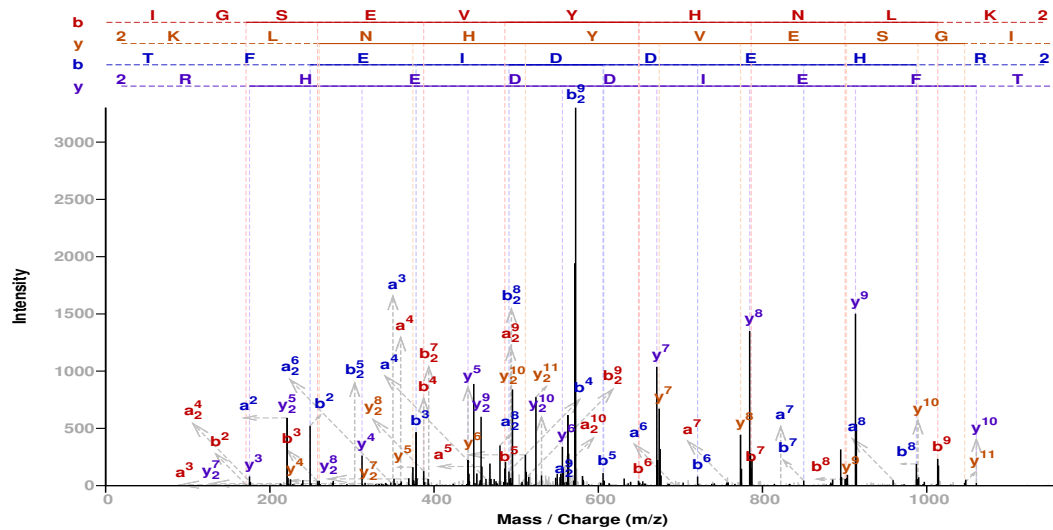

yeast3\_Scan\_Number\_8021 Precursor m/z: 633.880 cosine: 0.910  $\alpha$ : 0.667

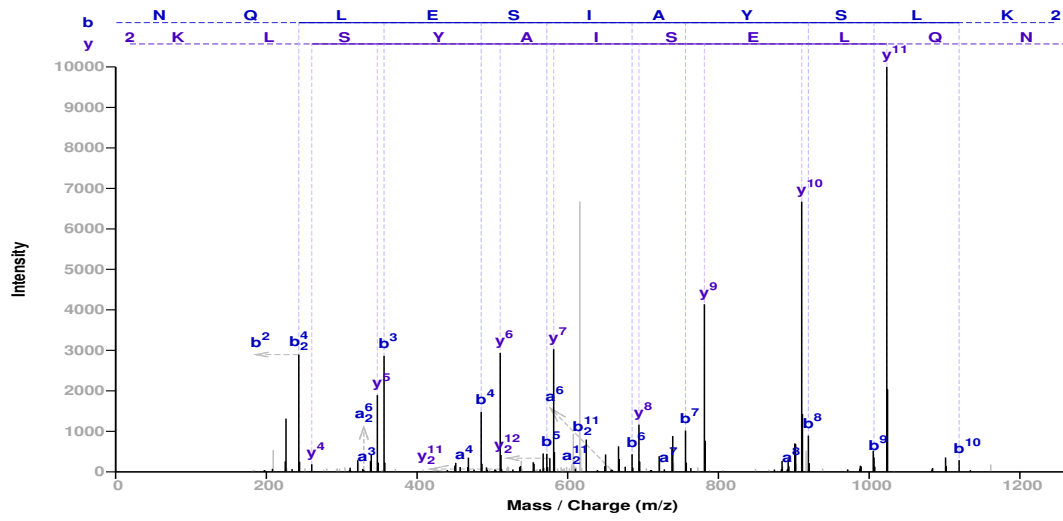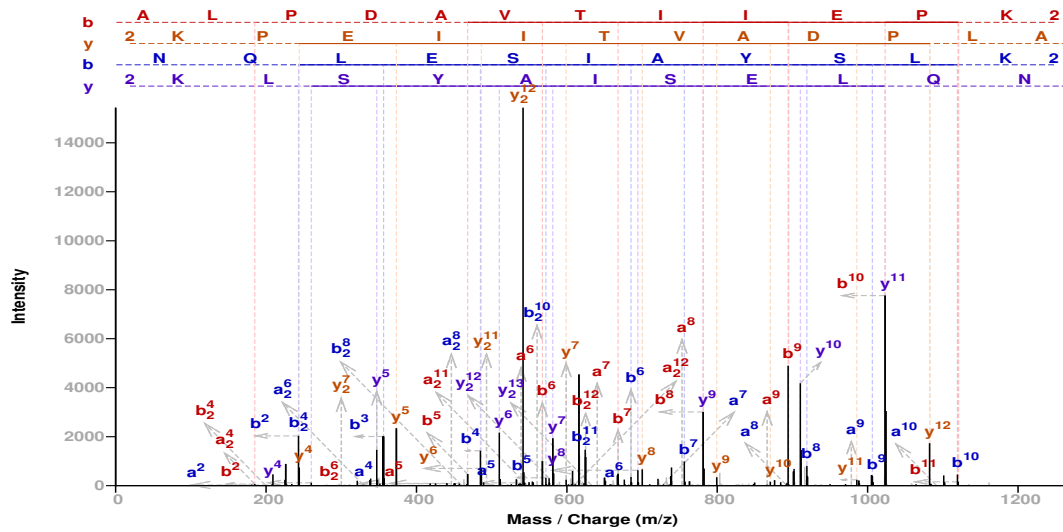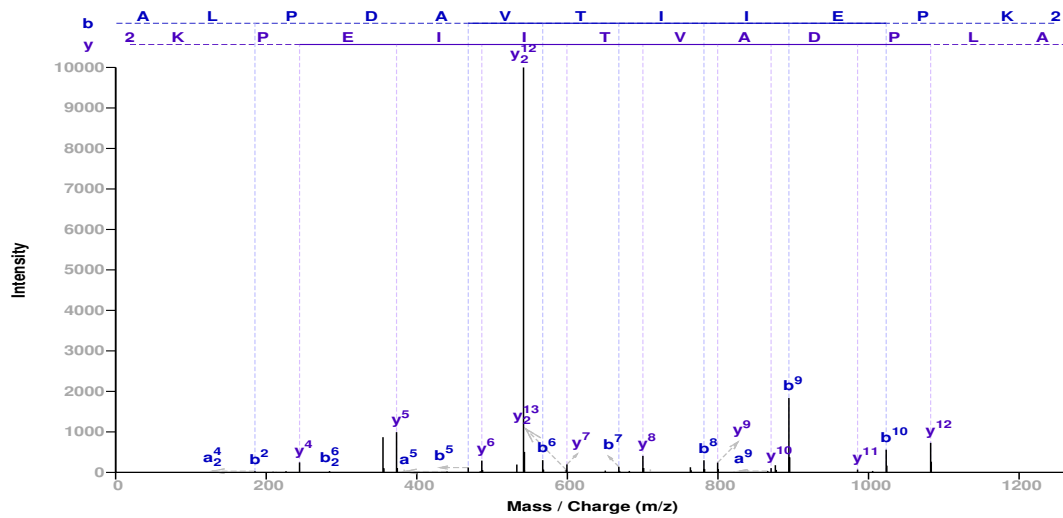

yeast3\_Scan\_Number\_6418 Precursor m/z: 367.213 cosine: 0.767  $\alpha$ : 0.666

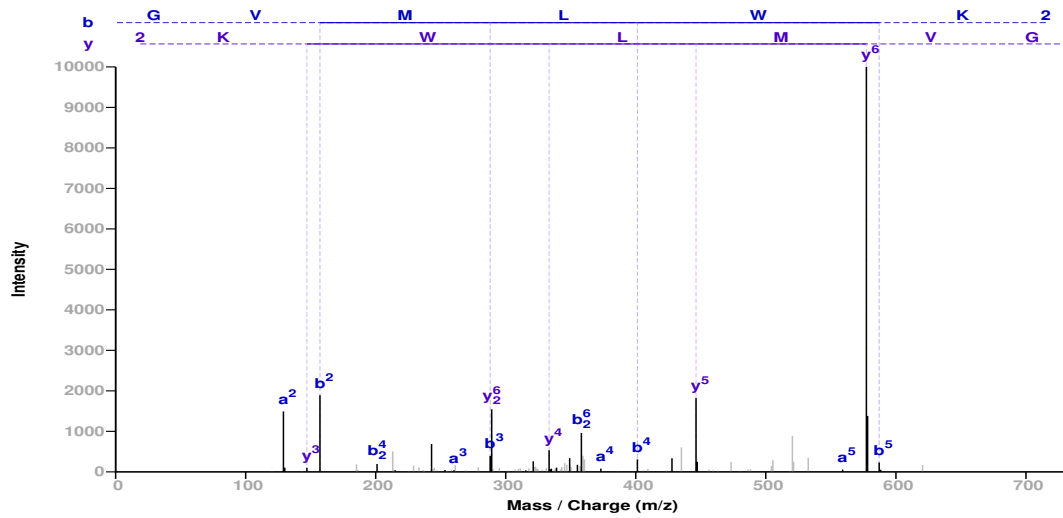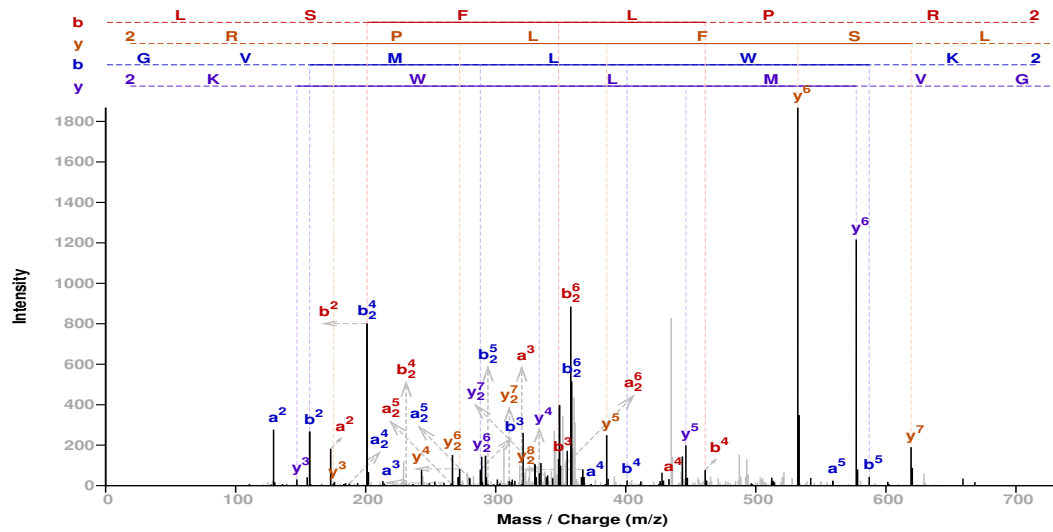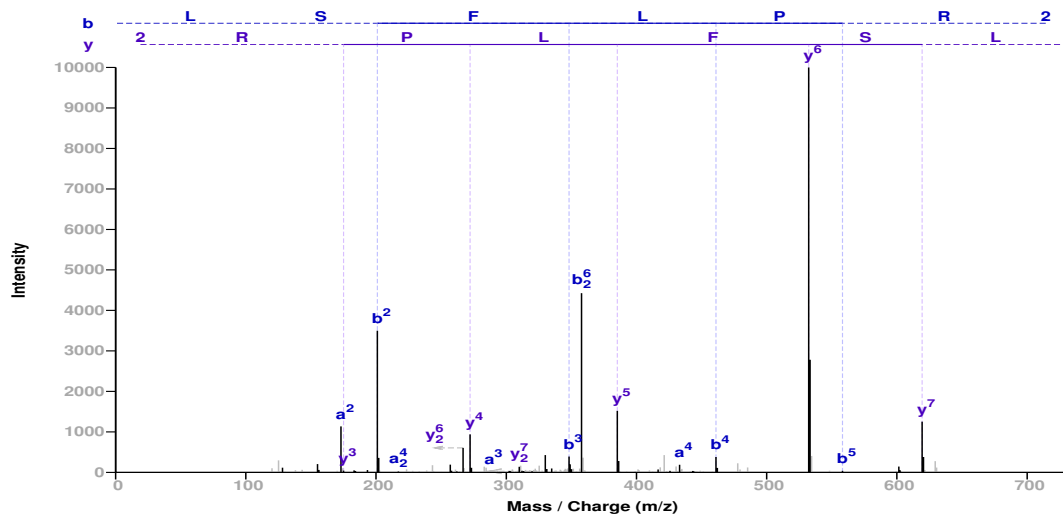

yeast3\_Scan\_Number\_2387 Precursor m/z: 492.287 cosine: 0.799  $\alpha$ : 0.658

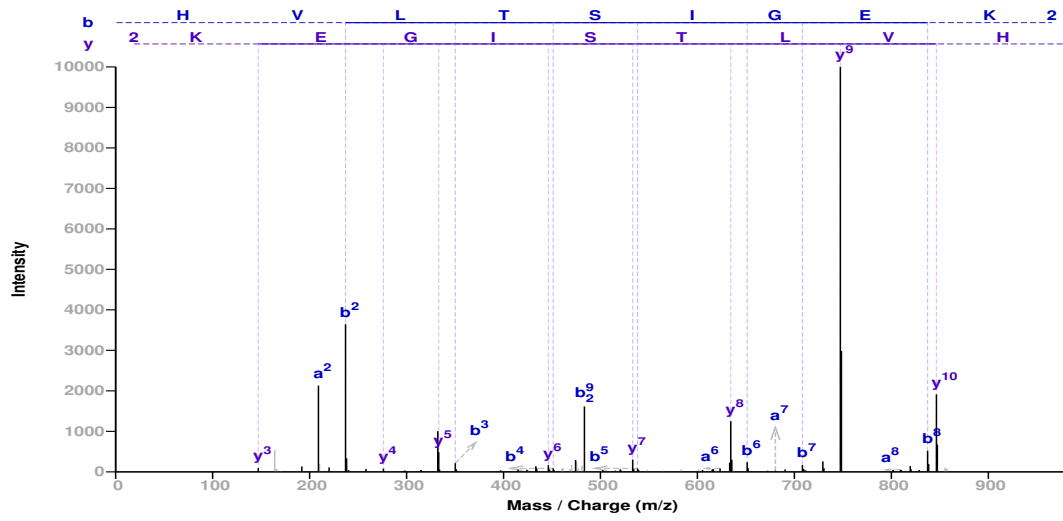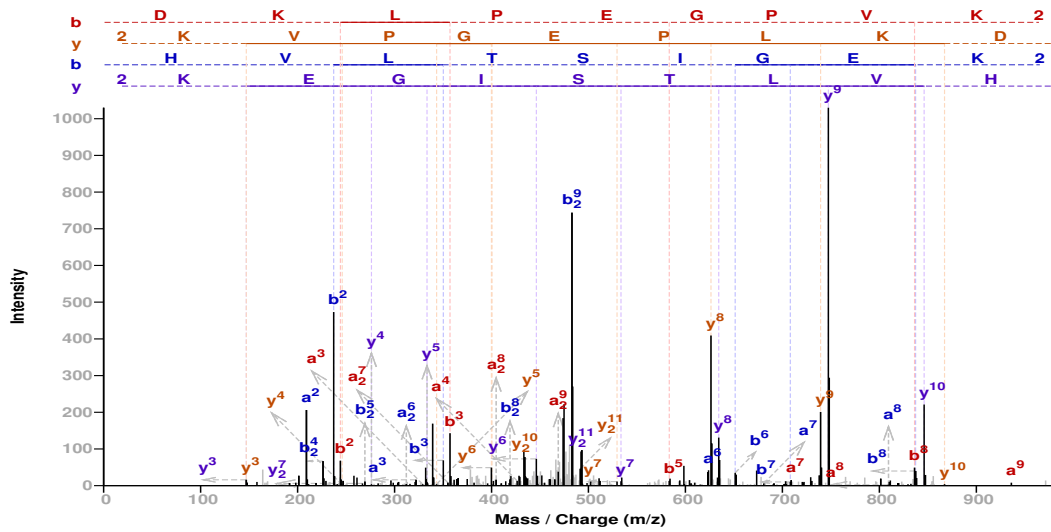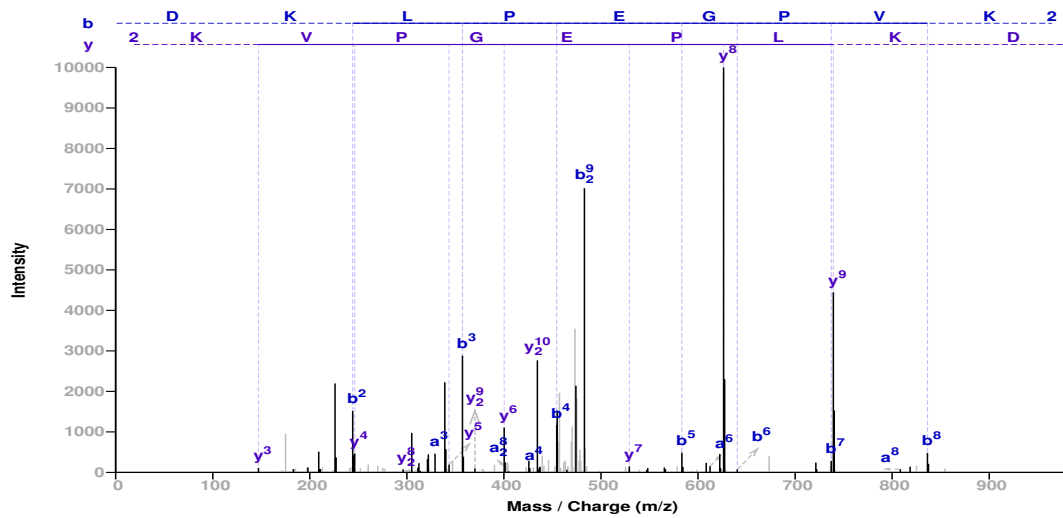

yeast3\_Scan\_Number\_5654 Precursor m/z: 412.568 cosine: 0.885  $\alpha$ : 0.656

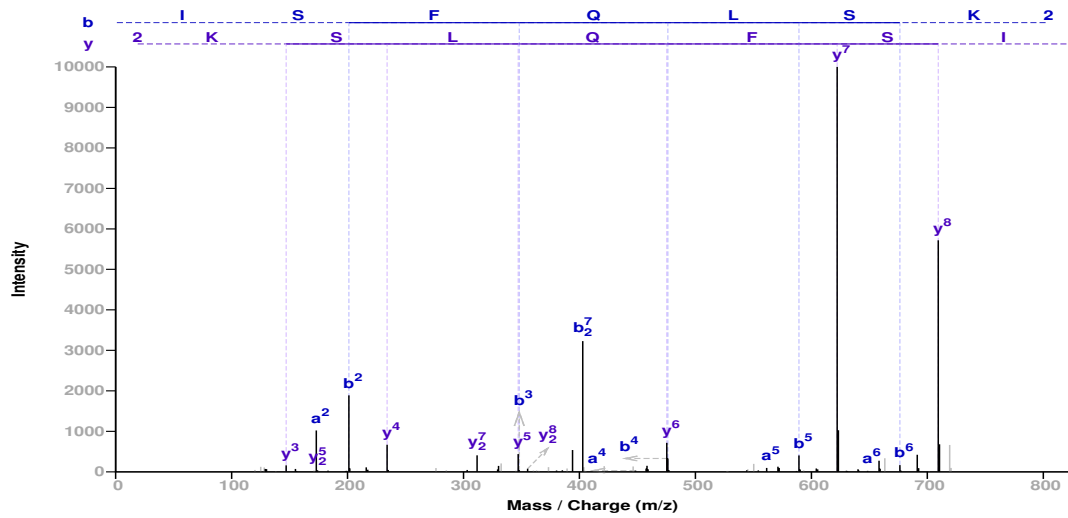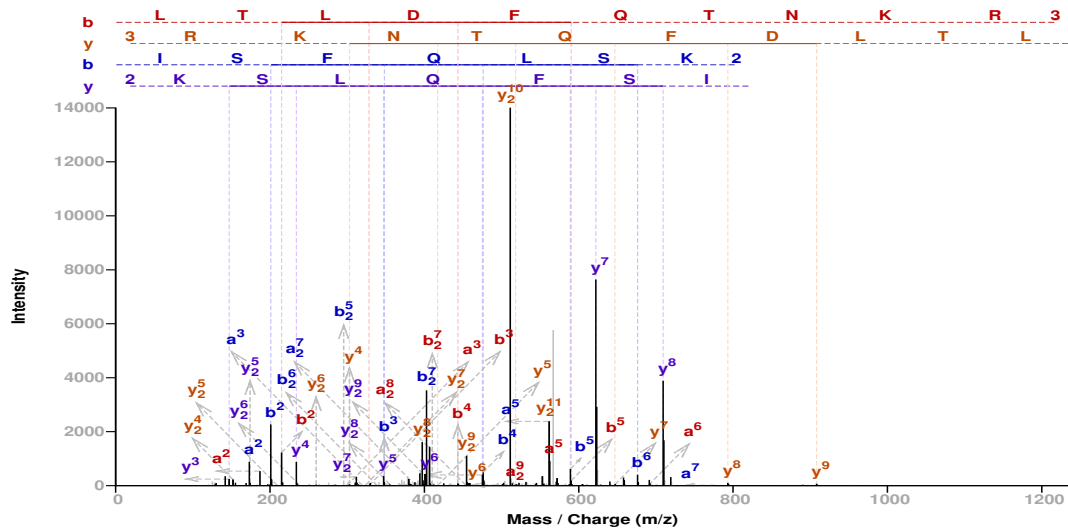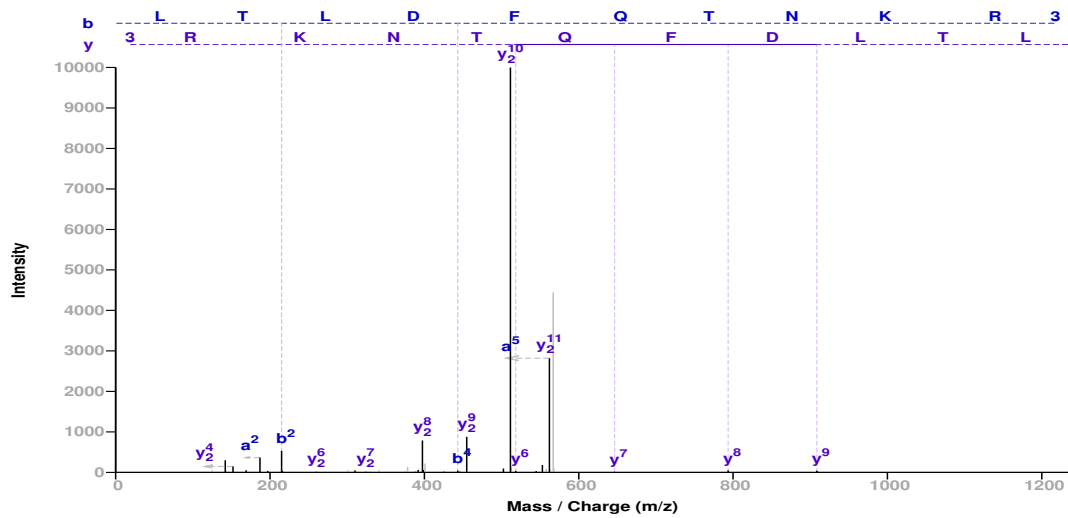

yeast3\_Scan\_Number\_2224 Precursor m/z: 625.844 cosine: 0.771  $\alpha$ : 0.652

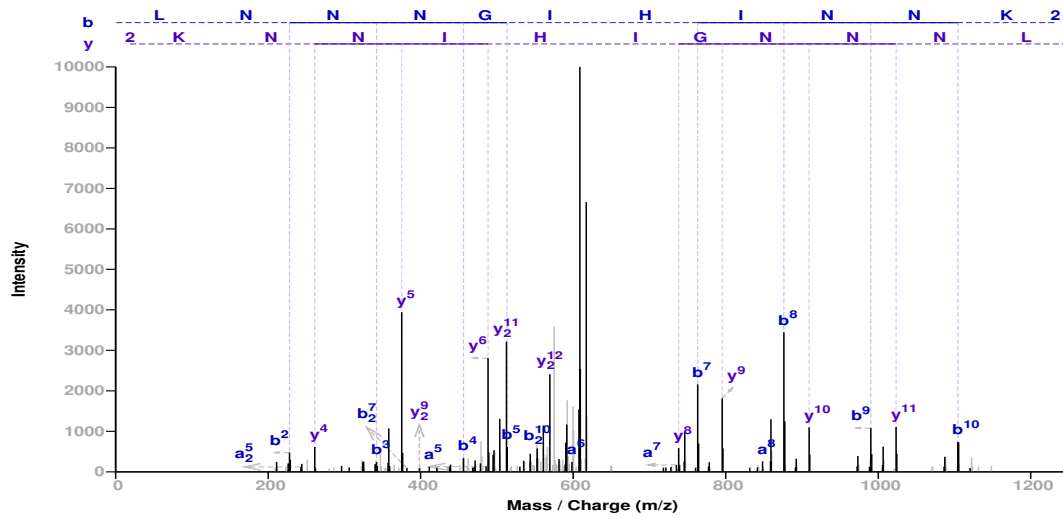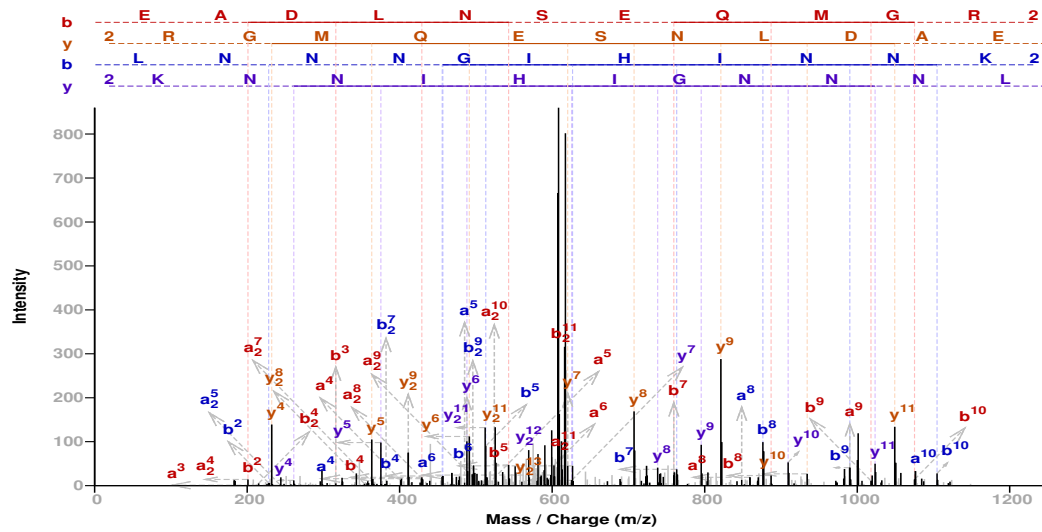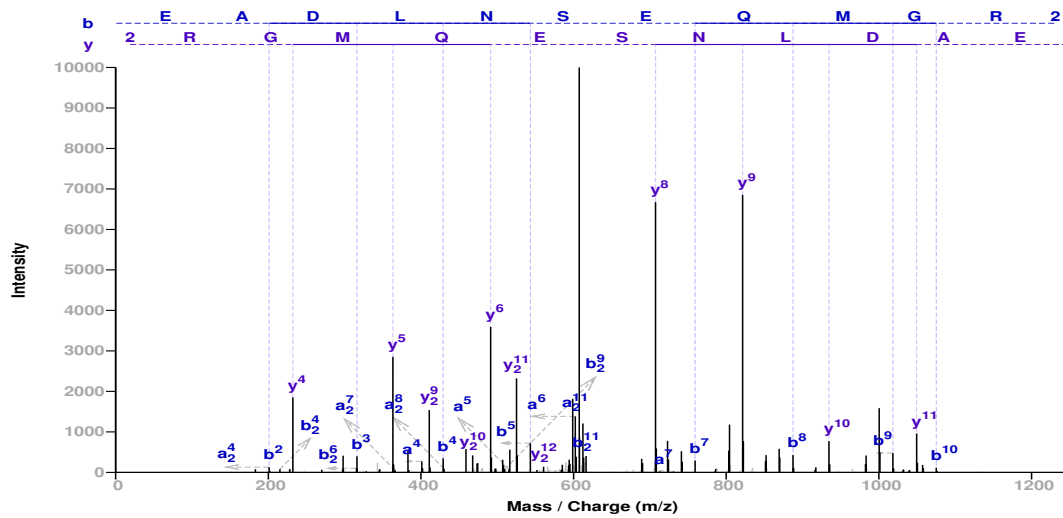

yeast3\_Scan\_Number\_8715 Precursor m/z: 483.279 cosine: 0.816  $\alpha$ : 0.651

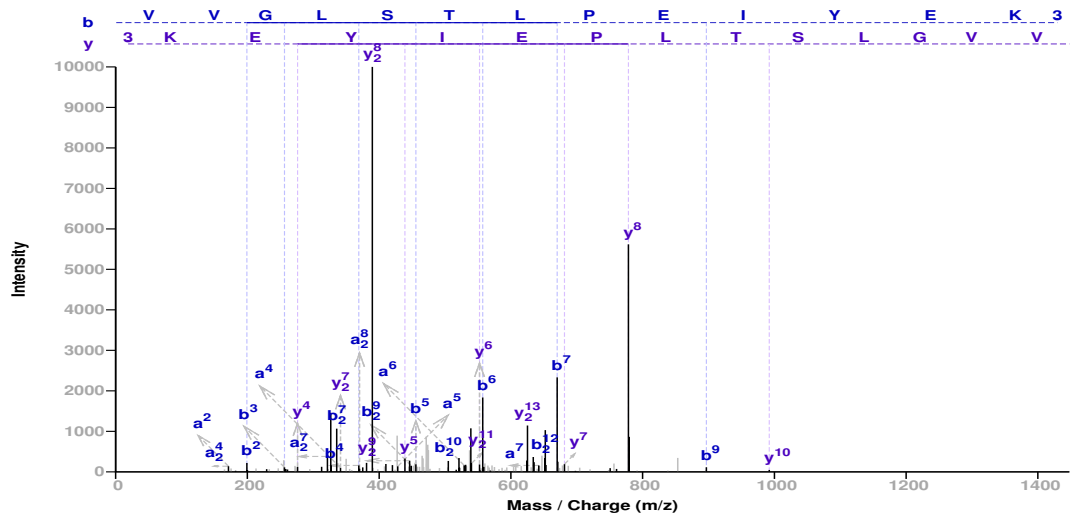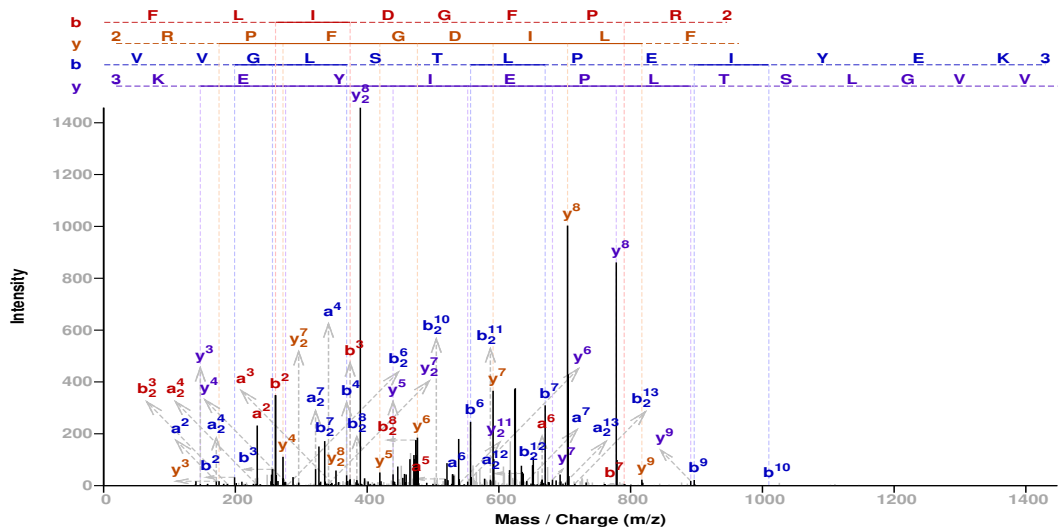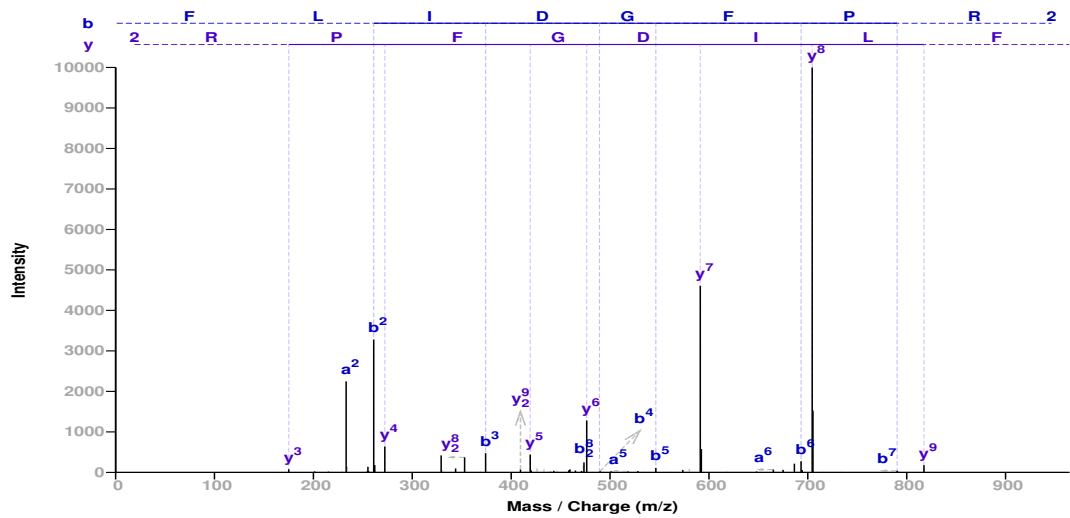





yeast3\_Scan\_Number\_5939 Precursor m/z: 536.292 cosine: 0.774  $\alpha$ : 0.648

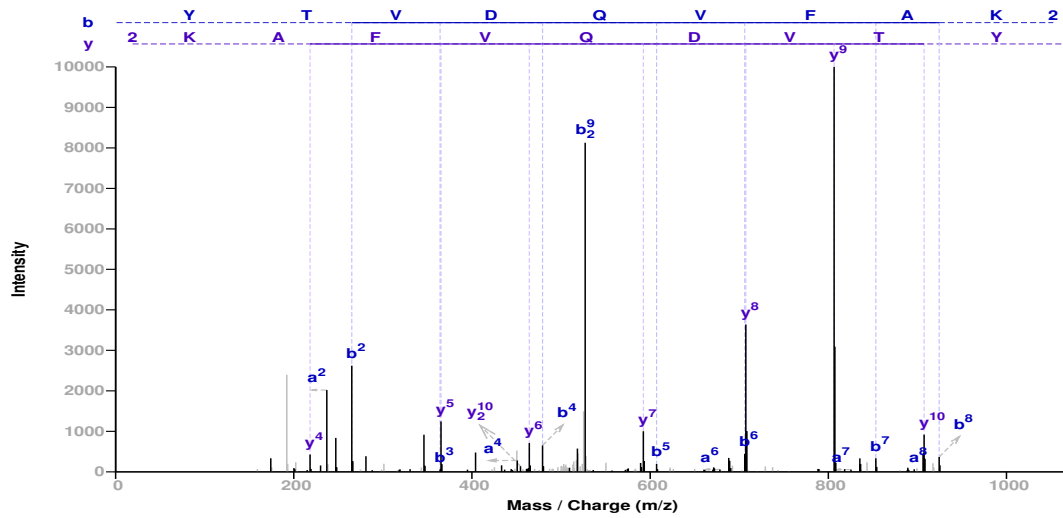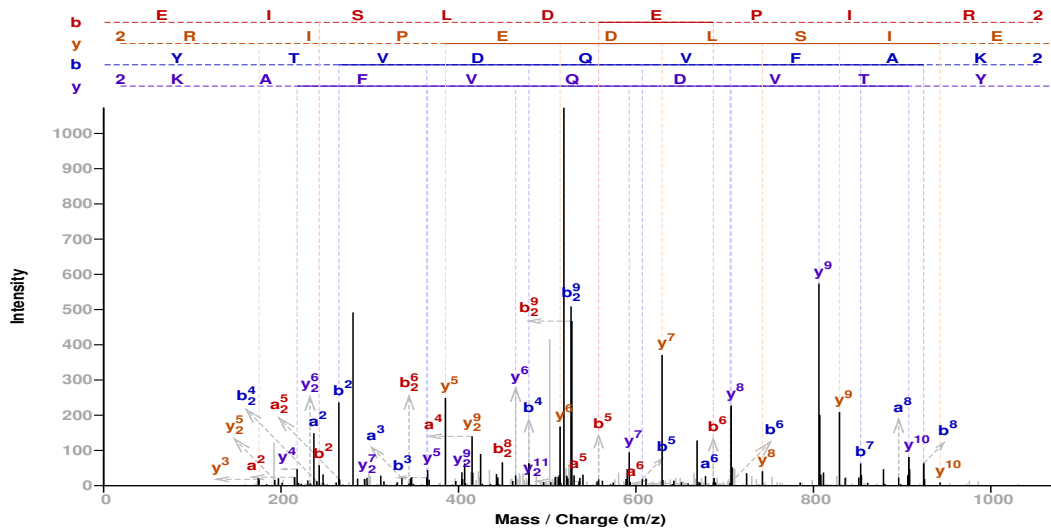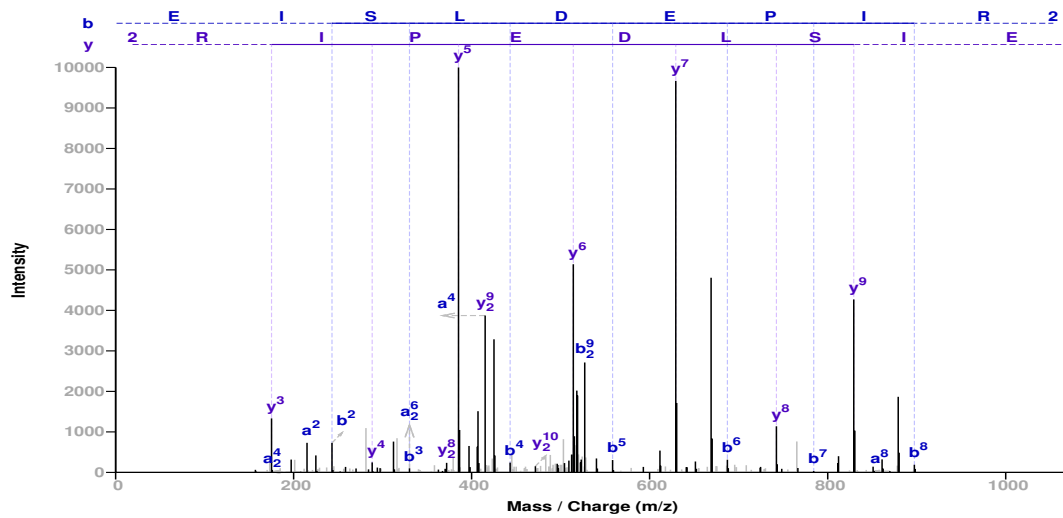

yeast3\_Scan\_Number\_3811 Precursor m/z: 531.763 cosine: 0.907  $\alpha$ : 0.645

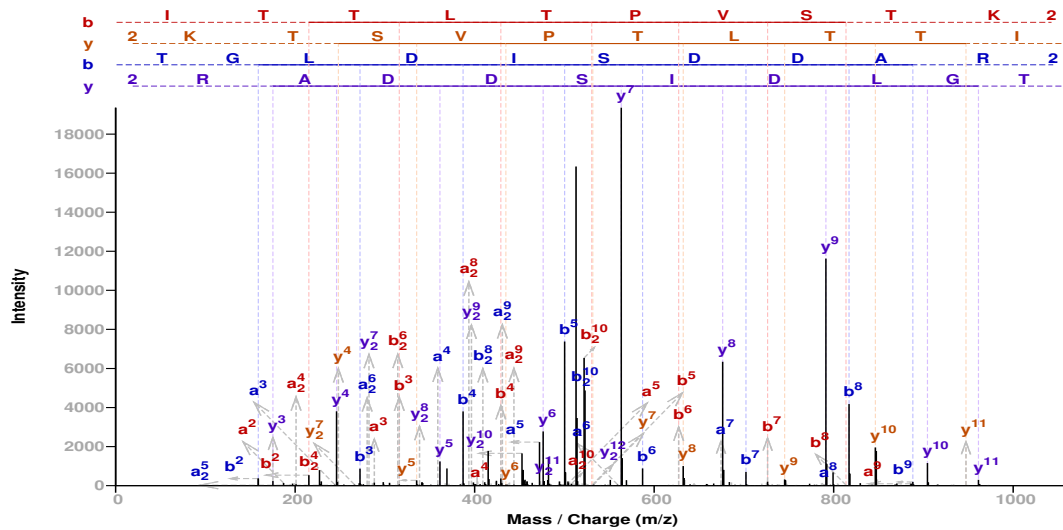

yeast3.Scan\_Number.2541 Precursor m/z: 520.262 cosine: 0.804  $\alpha$ : 0.645

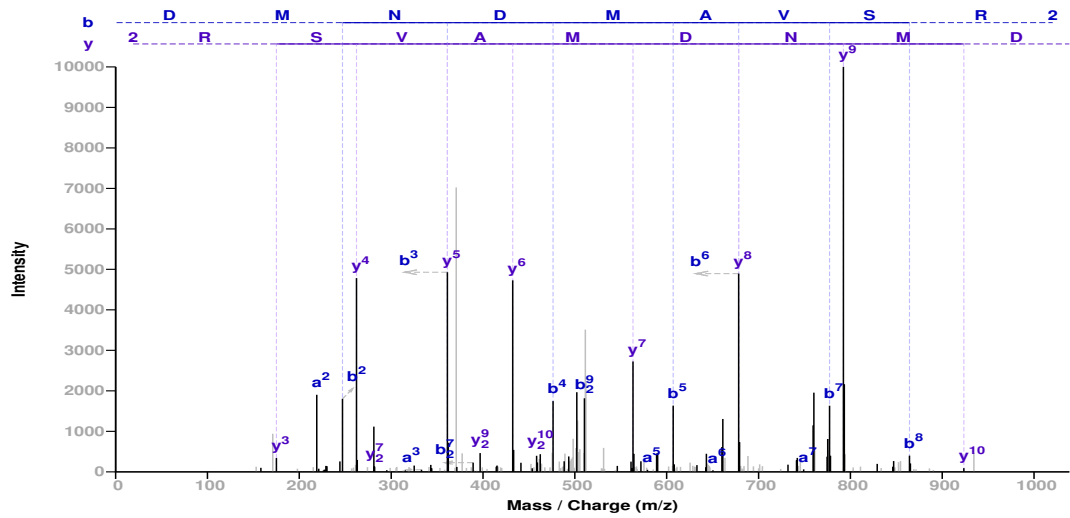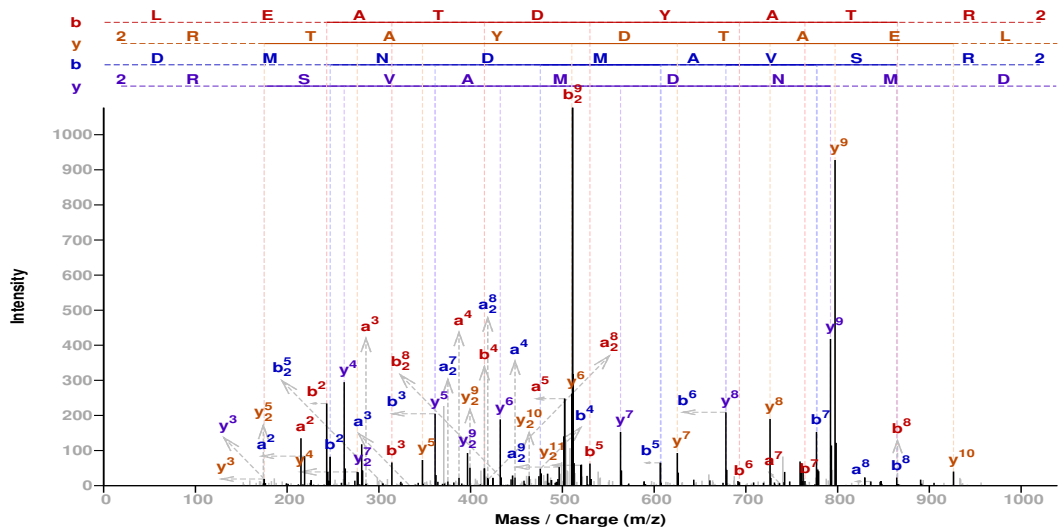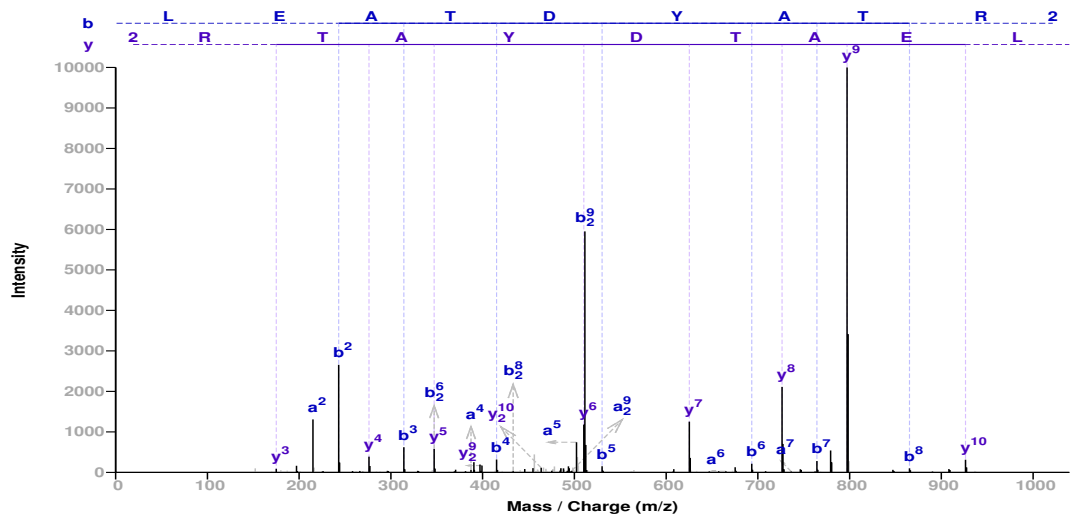

yeast3.Scan\_Number.1004 Precursor m/z: 459.710 cosine: 0.819  $\alpha$ : 0.640

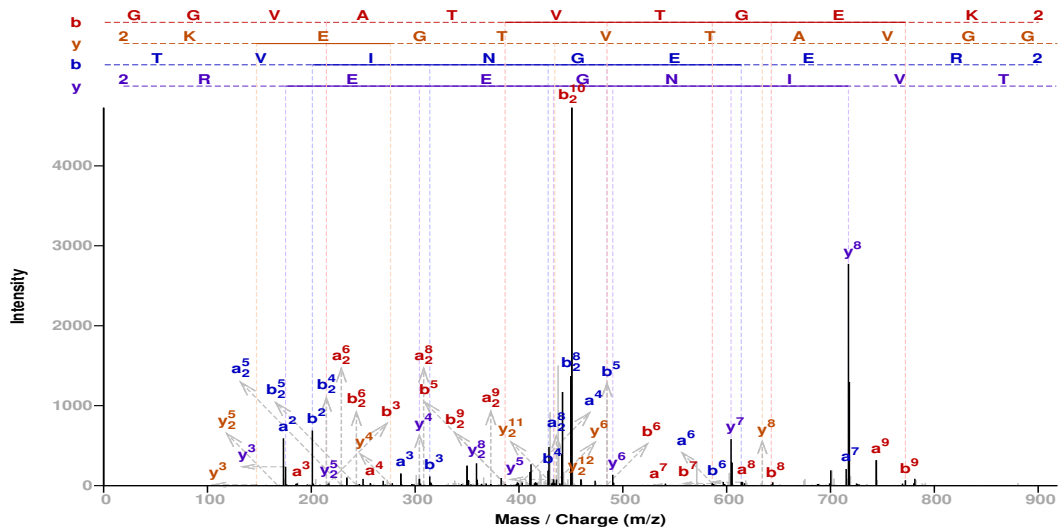

yeast3\_Scan\_Number\_8865 Precursor m/z: 779.083 cosine: 0.752  $\alpha$ : 0.636

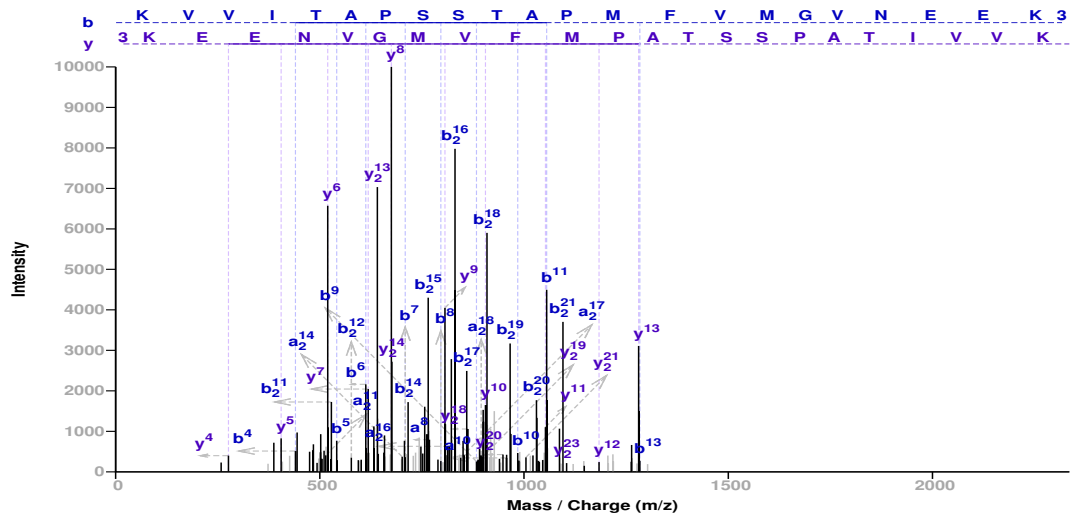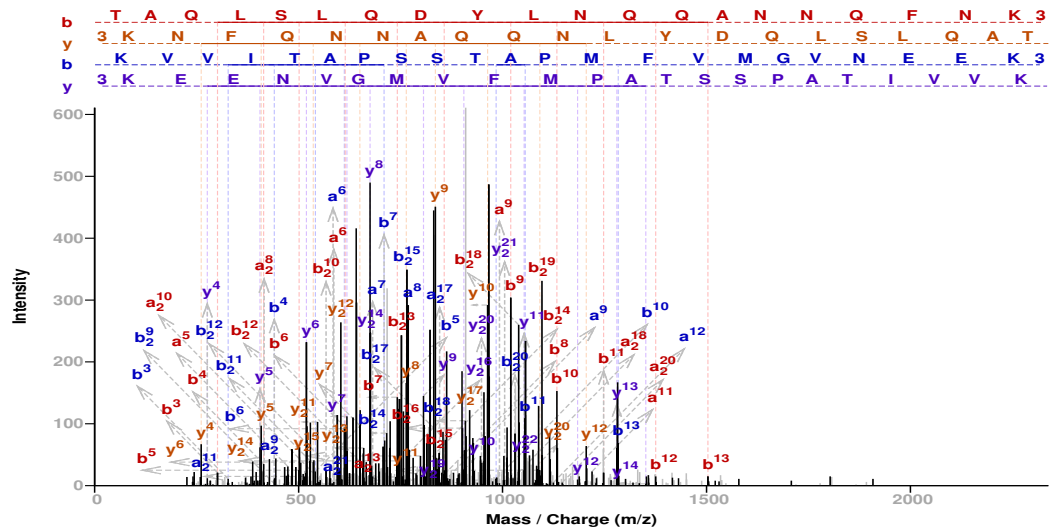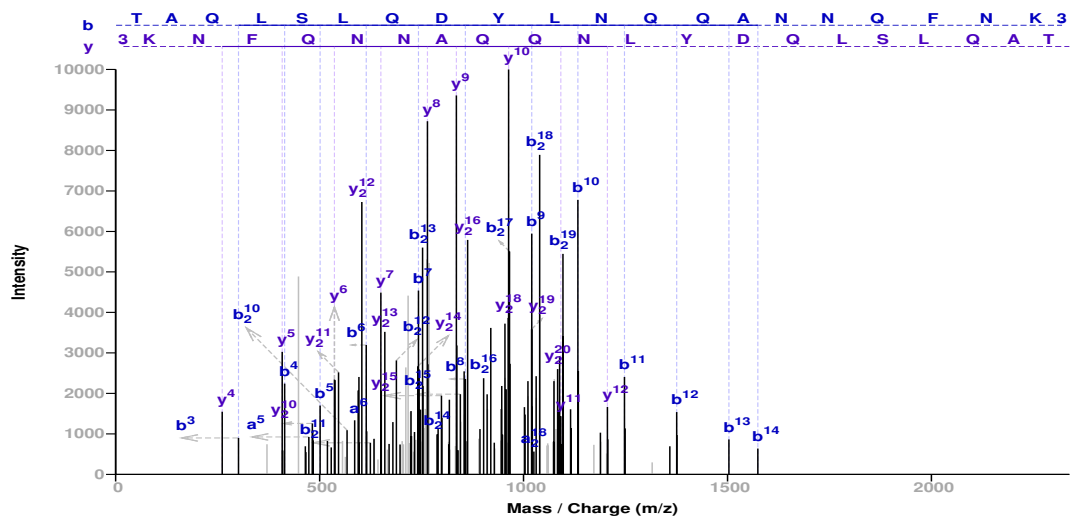

yeast3\_Scan\_Number\_3743 Precursor m/z: 400.216 cosine: 0.740  $\alpha$ : 0.612

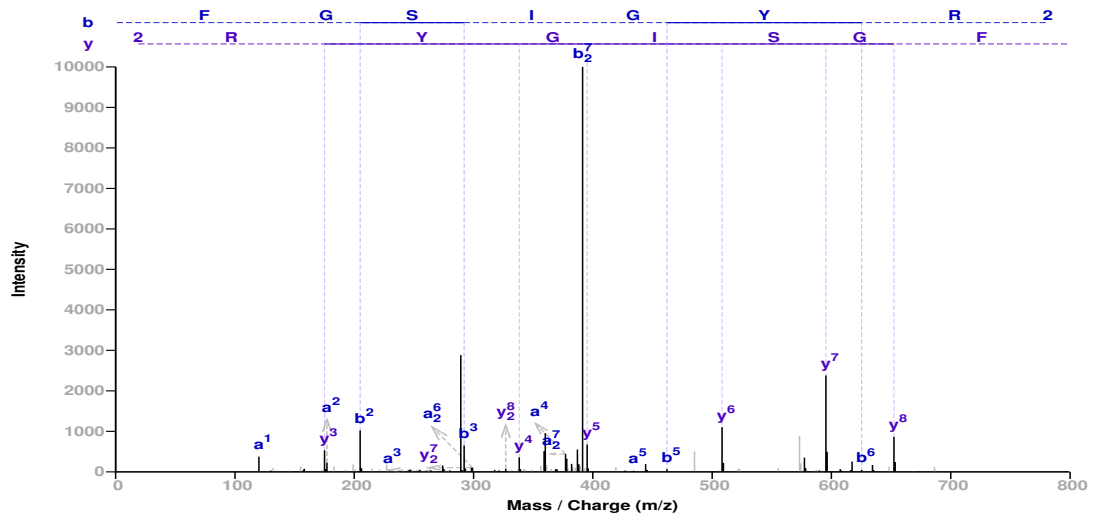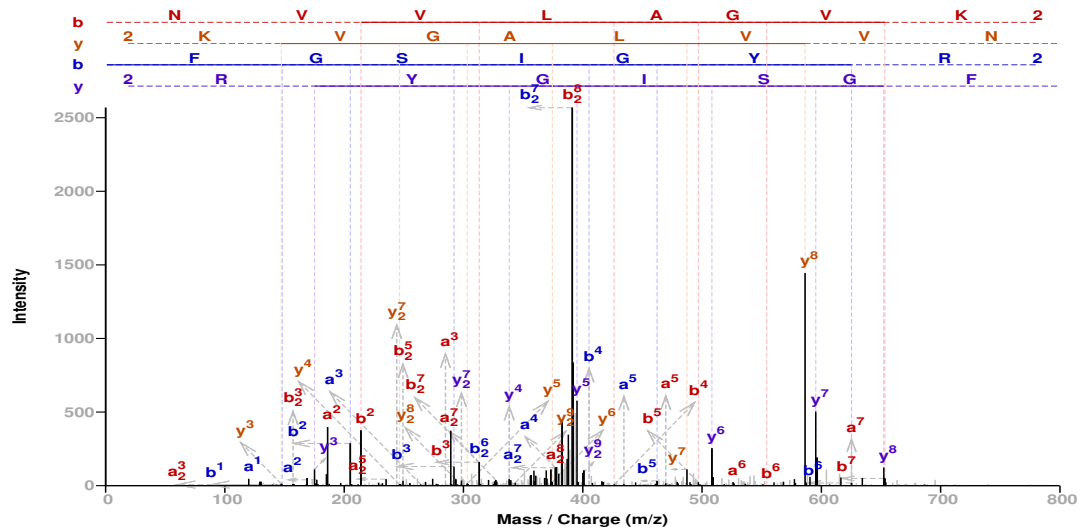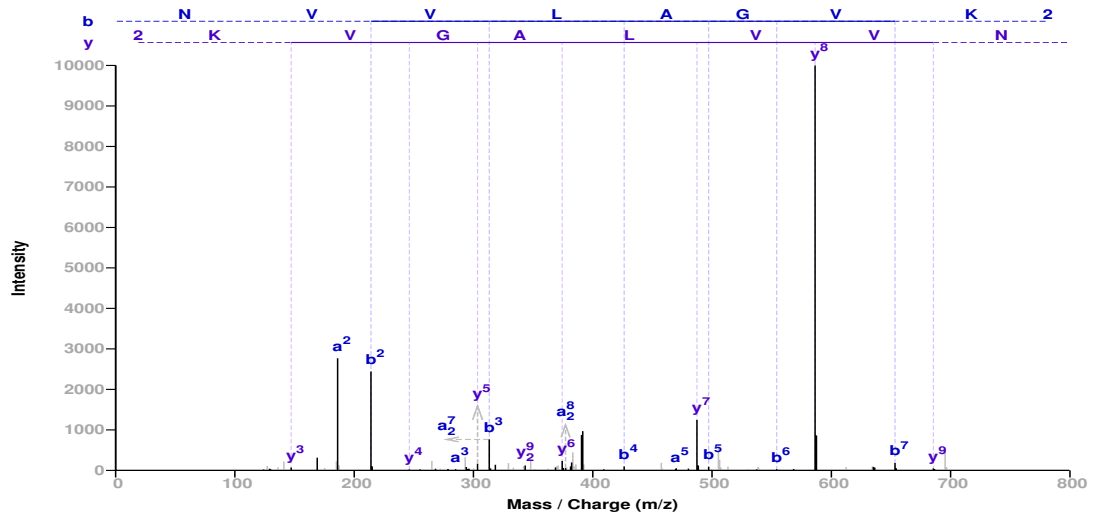





yeast3\_Scan\_Number\_3786 Precursor m/z: 457.769 cosine: 0.791  $\alpha$ : 0.600

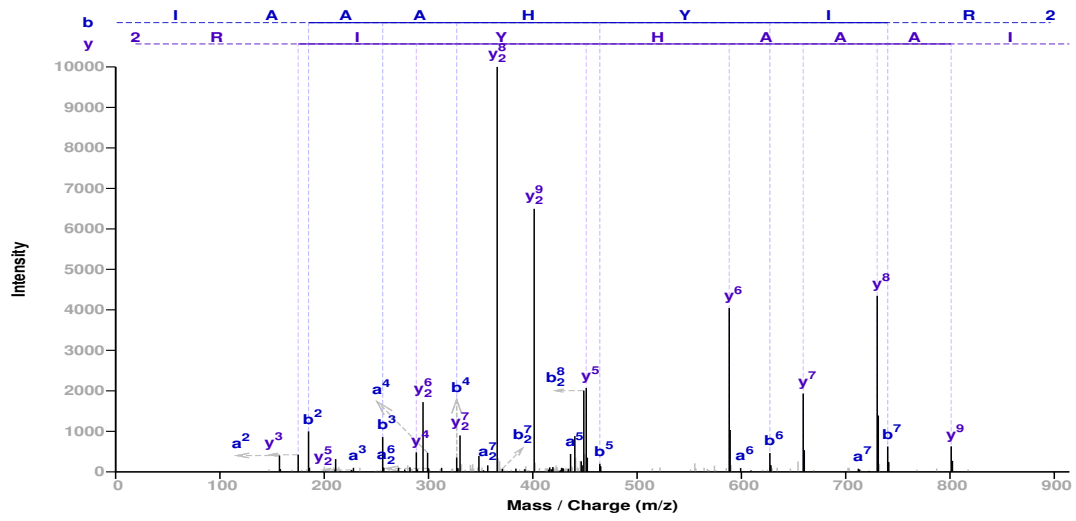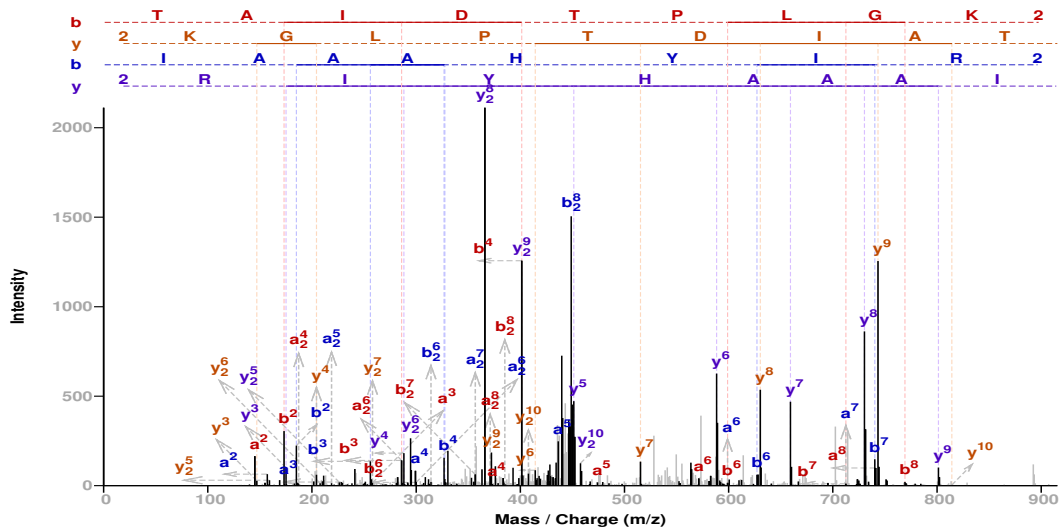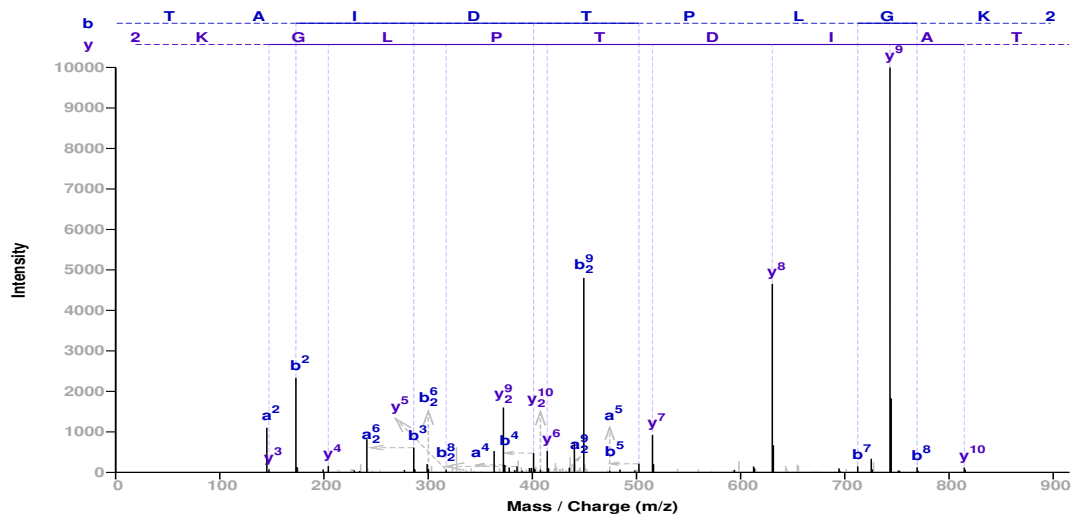



yeast3\_Scan\_Number\_791 Precursor m/z: 430.233 cosine: 0.803  $\alpha$ : 0.597

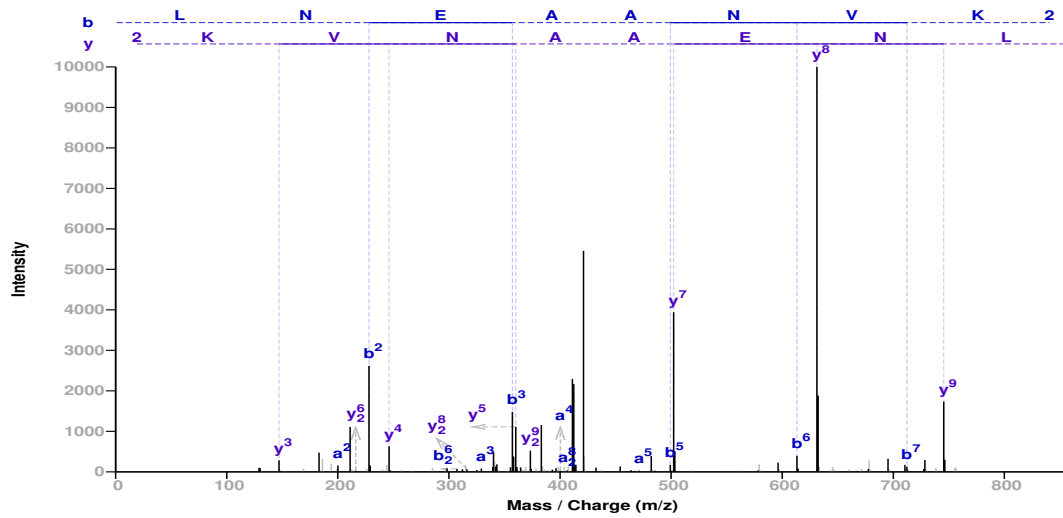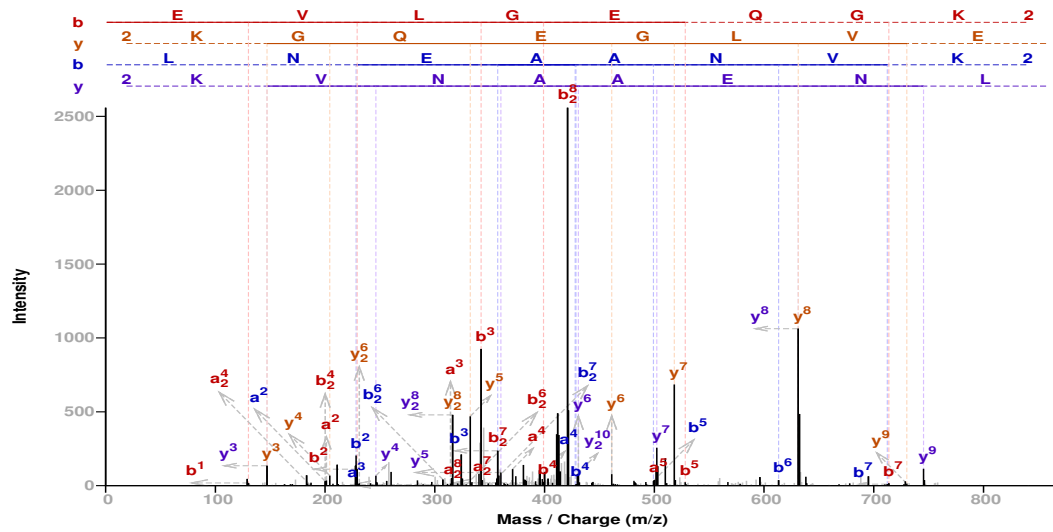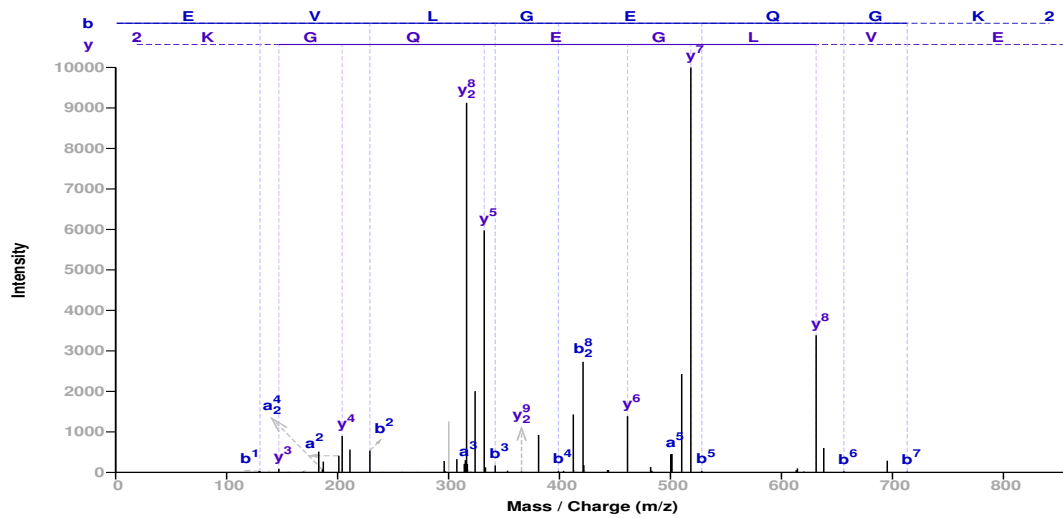



yeast3\_Scan\_Number\_7940 Precursor m/z: 651.372 cosine: 0.870  $\alpha$ : 0.582

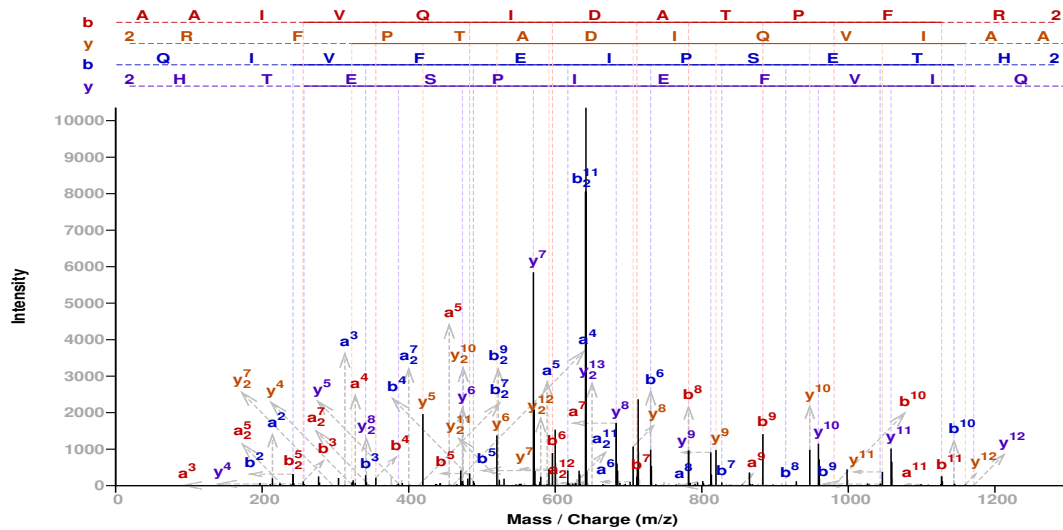

yeast3\_Scan\_Number\_7813 Precursor m/z: 603.310 cosine: 0.797  $\alpha$ : 0.571

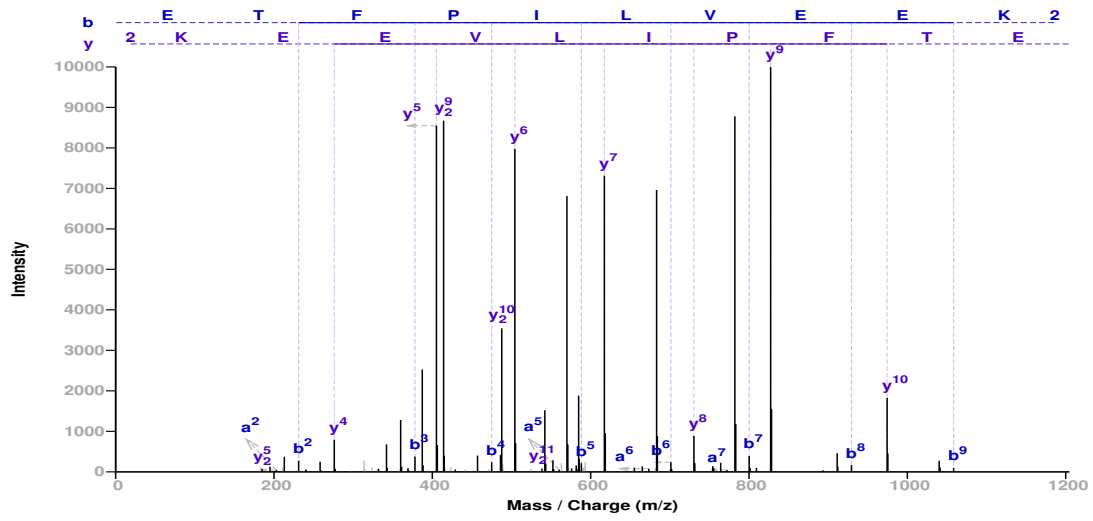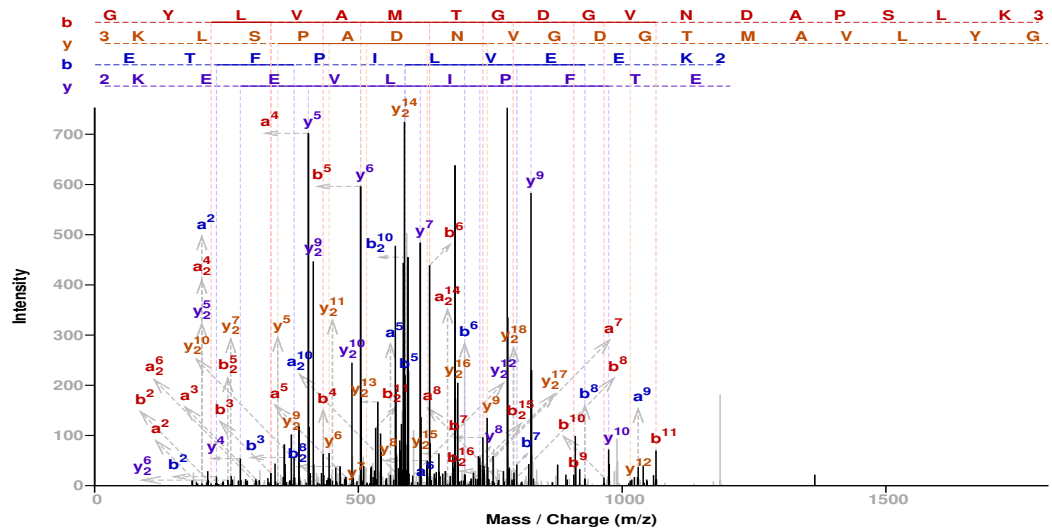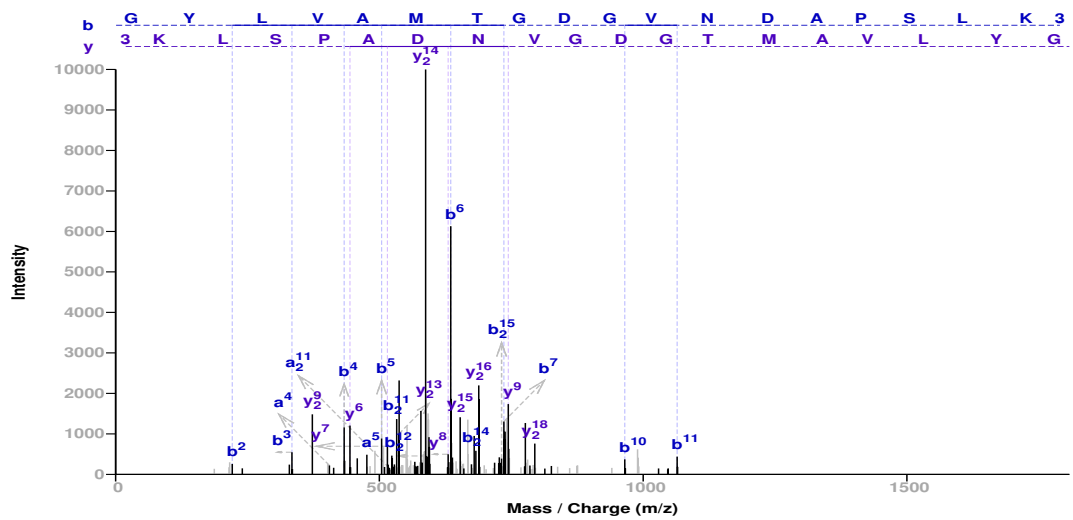

yeast3\_Scan\_Number\_2798 Precursor m/z: 483.305 cosine: 0.735  $\alpha$ : 0.548

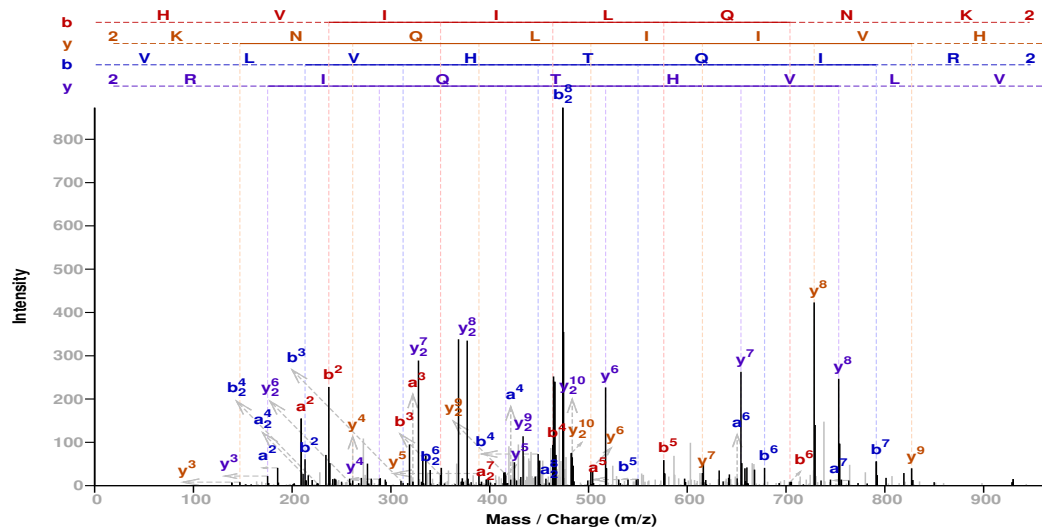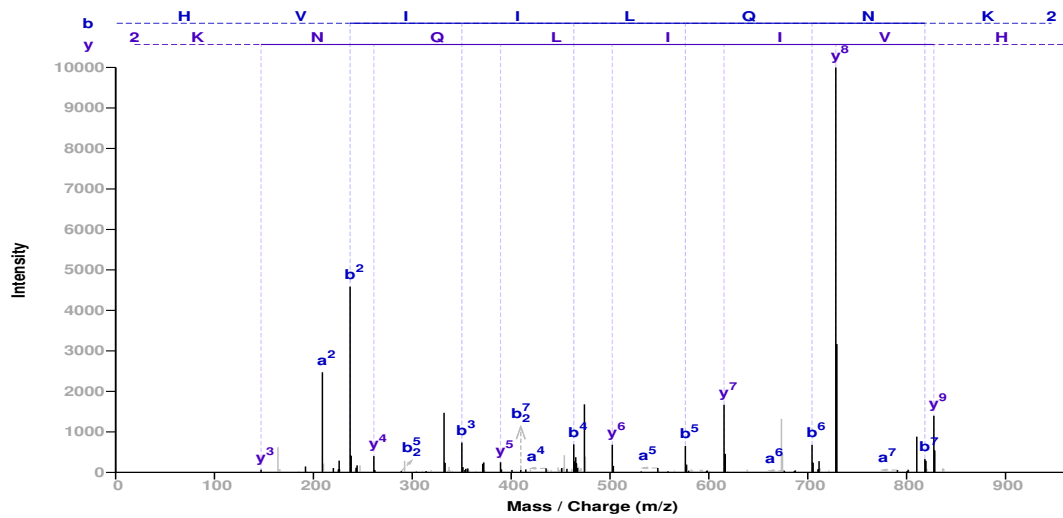

yeast3\_Scan\_Number\_6733 Precursor m/z: 452.608 cosine: 0.733  $\alpha$ : 0.547

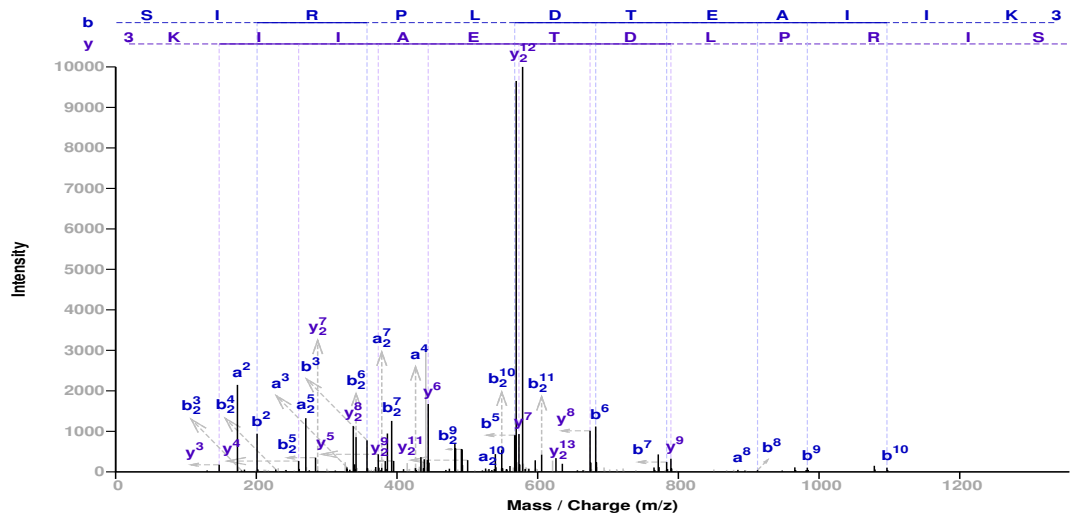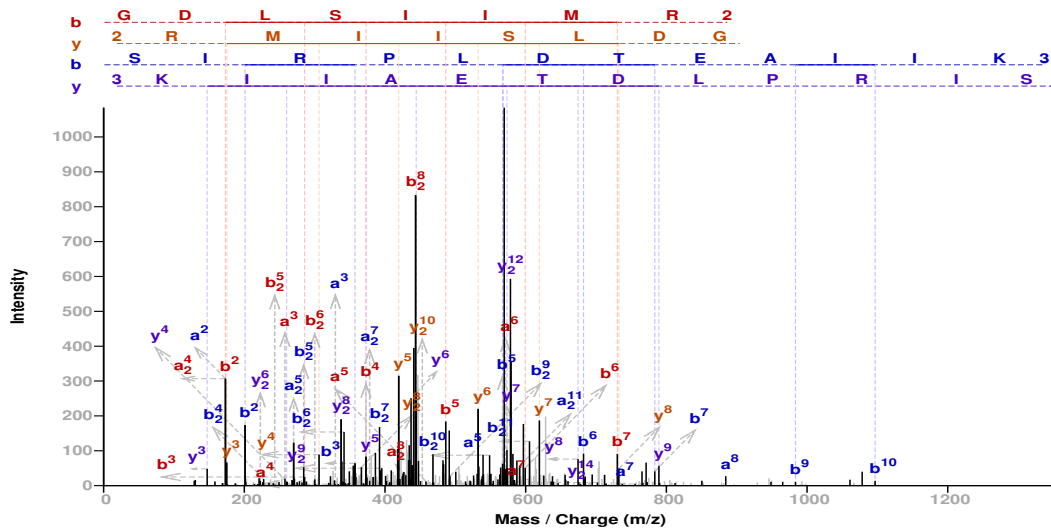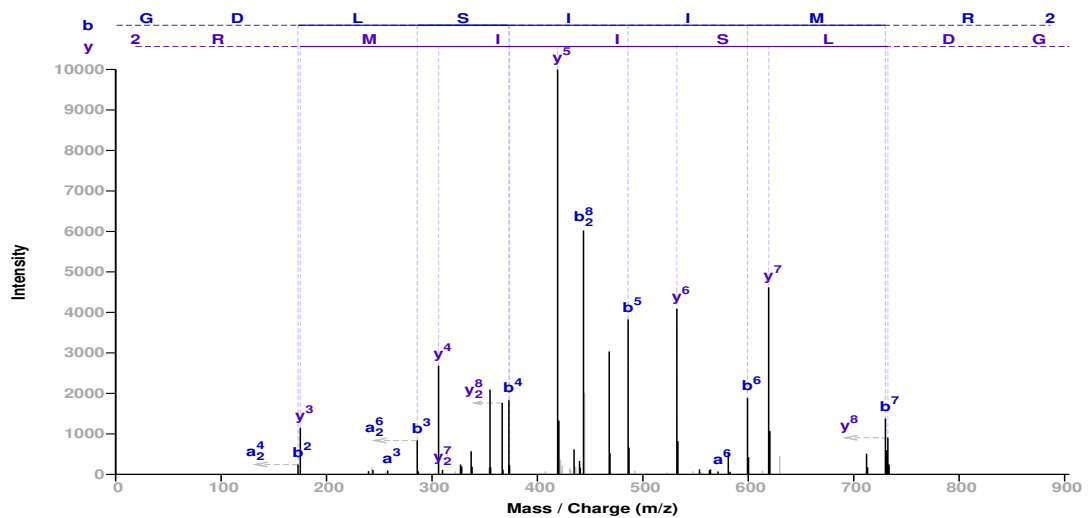



yeast3\_Scan\_Number\_4165 Precursor m/z: 418.588 cosine: 0.793  $\alpha$ : 0.545

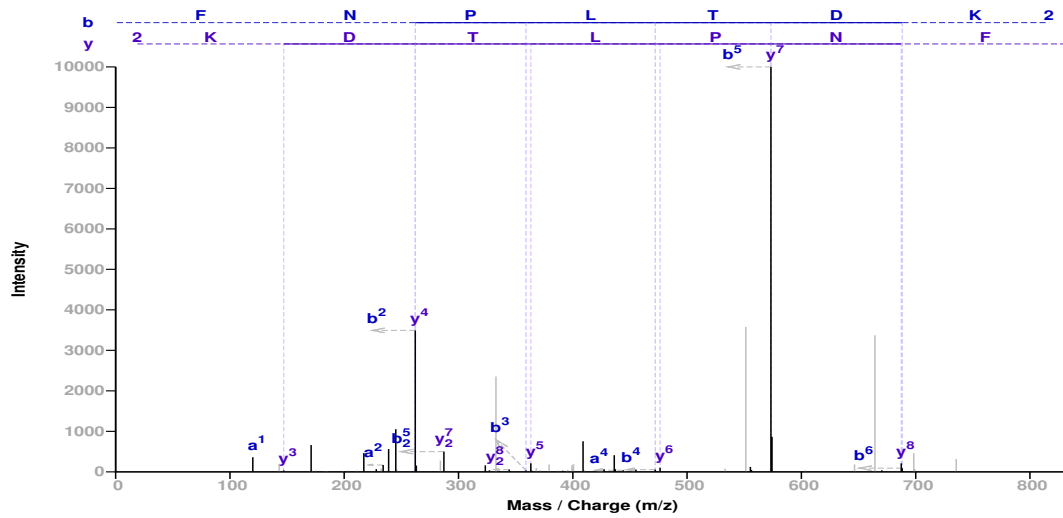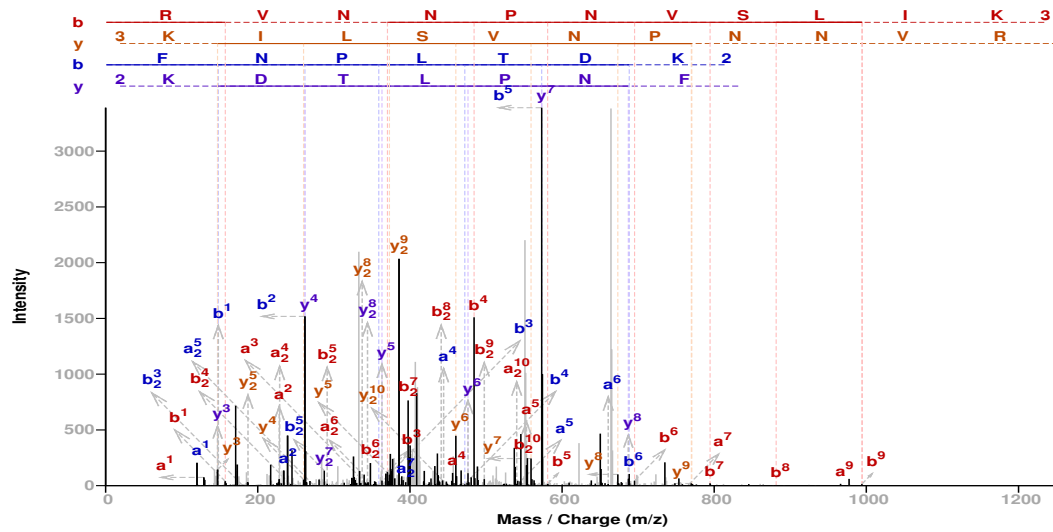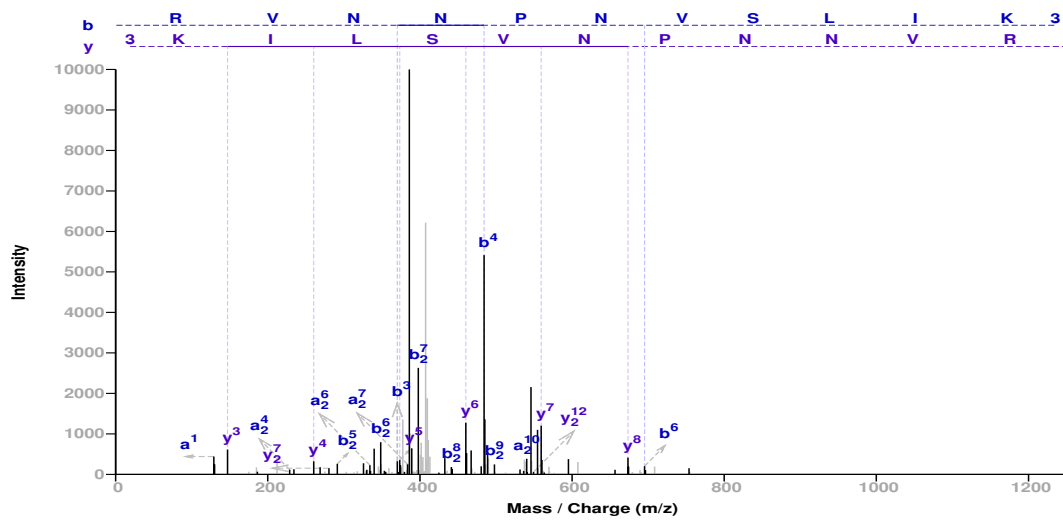

yeast3\_Scan\_Number\_2167 Precursor m/z: 509.778 cosine: 0.781  $\alpha$ : 0.536

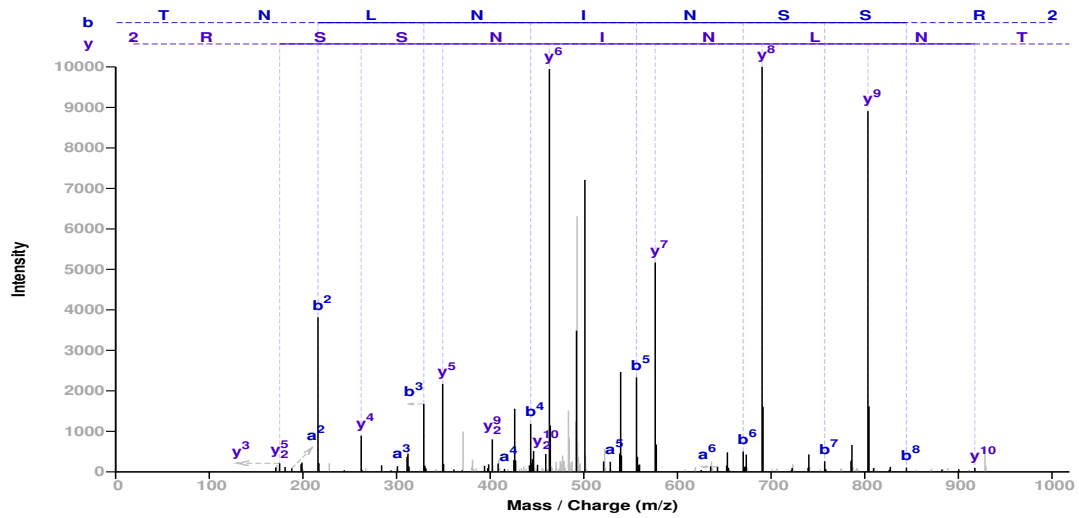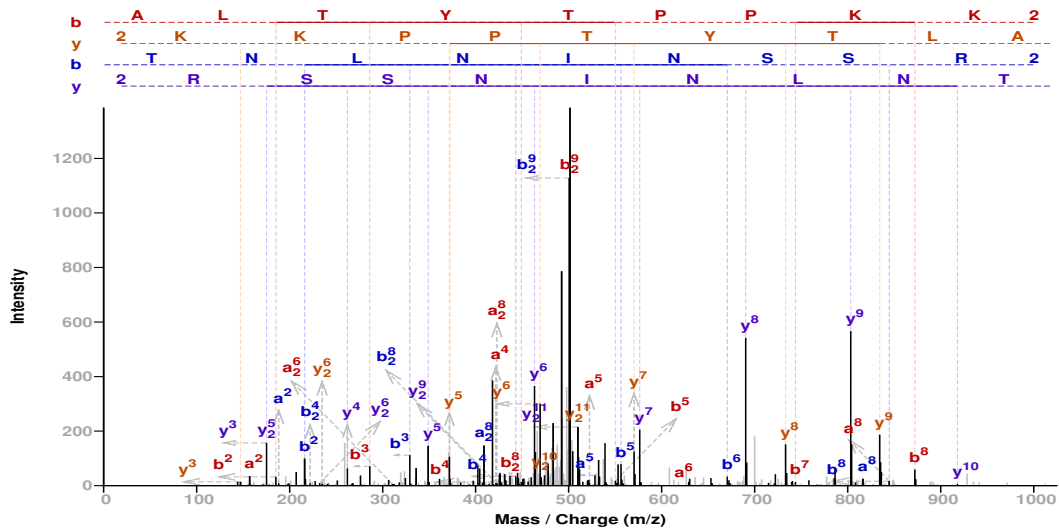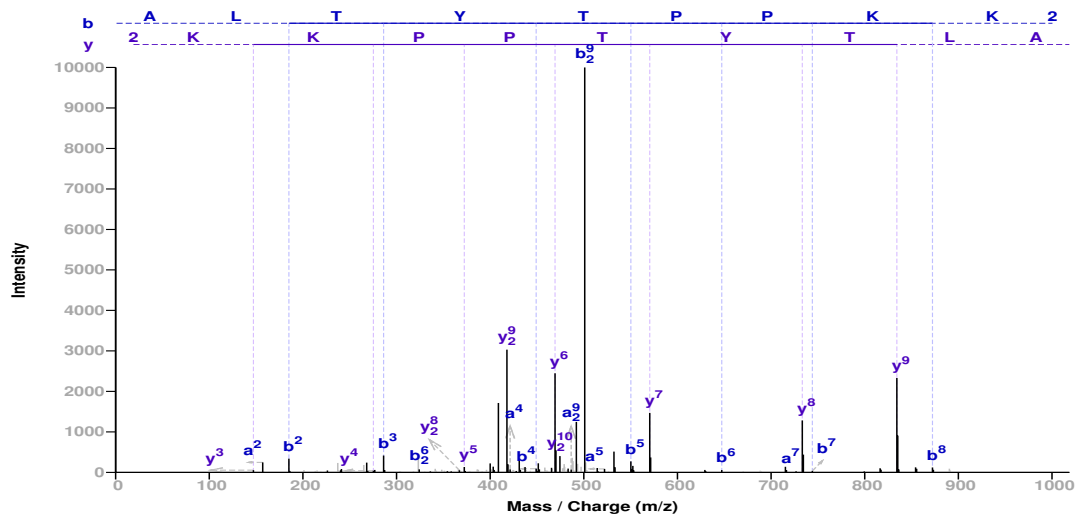



yeast3\_Scan\_Number\_4005 Precursor m/z: 619.346 cosine: 0.724  $\alpha$ : 0.528

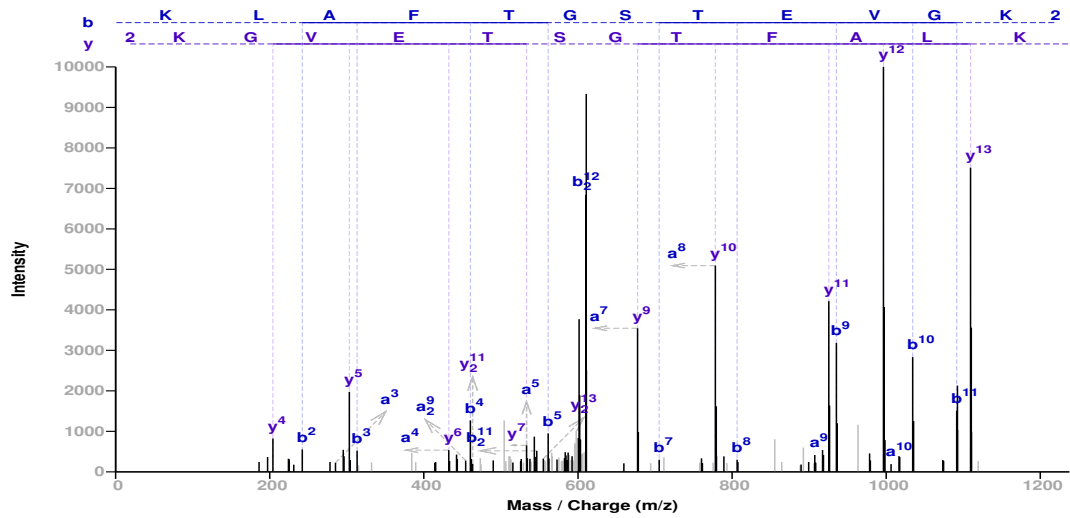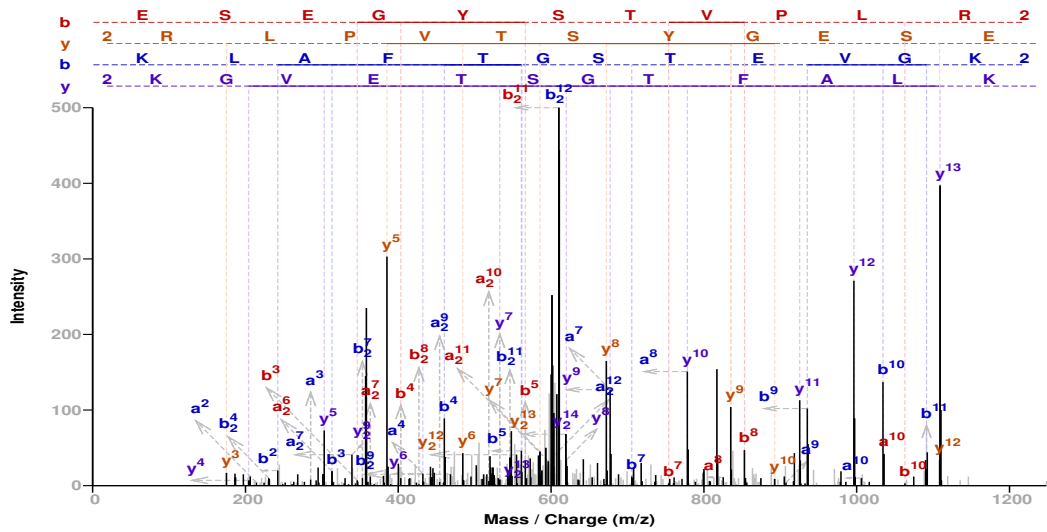

yeast3\_Scan\_Number\_2707 Precursor m/z: 568.774 cosine: 0.827  $\alpha$ : 0.519

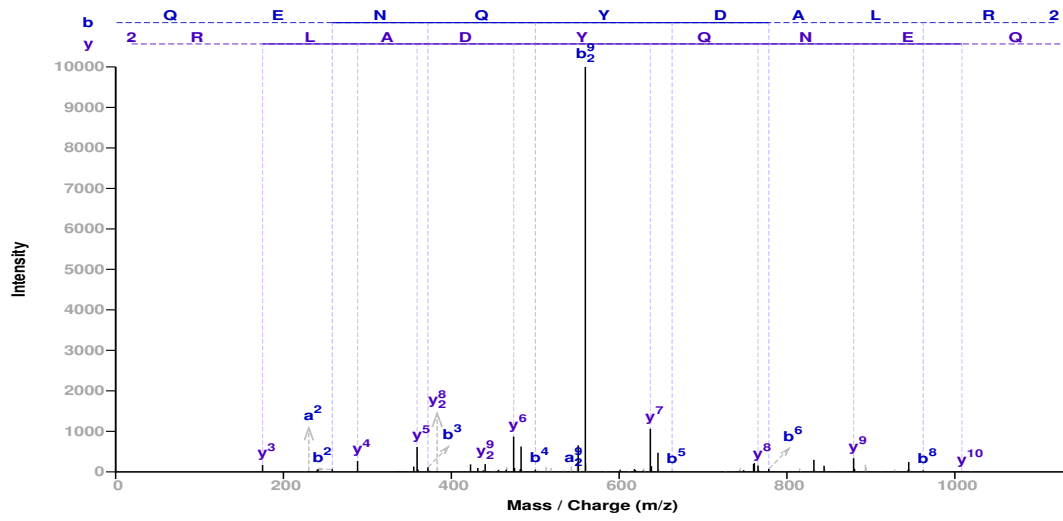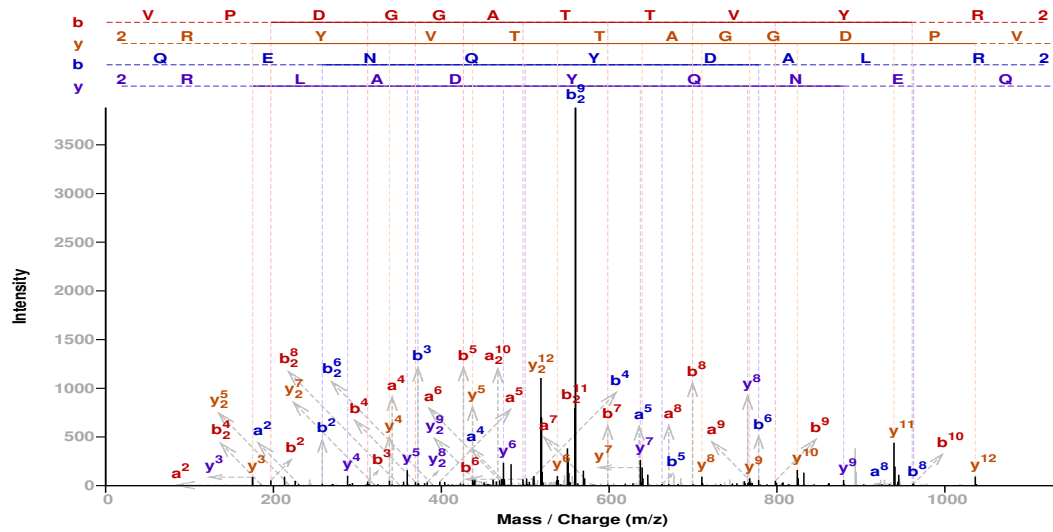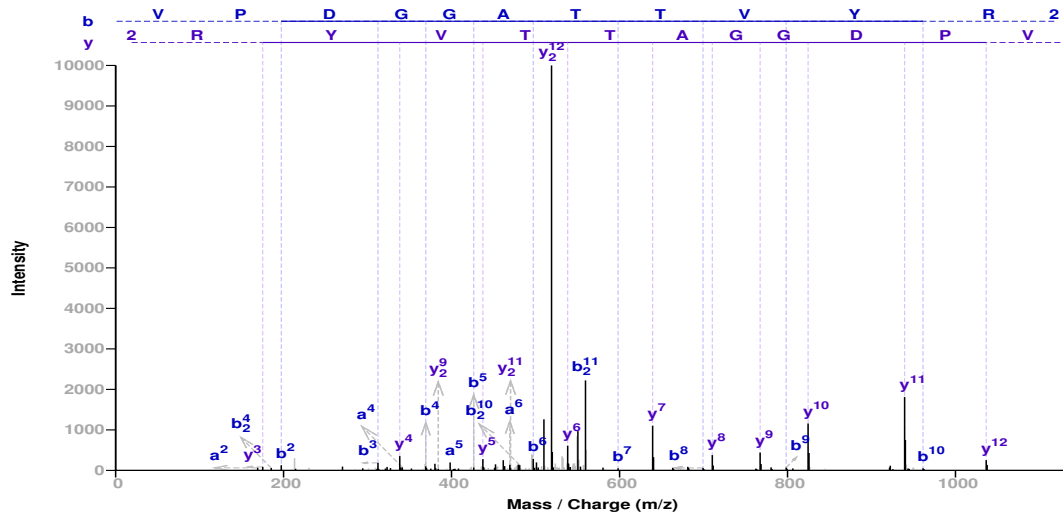

yeast3\_Scan\_Number\_8261 Precursor m/z: 661.364 cosine: 0.727  $\alpha$ : 0.518

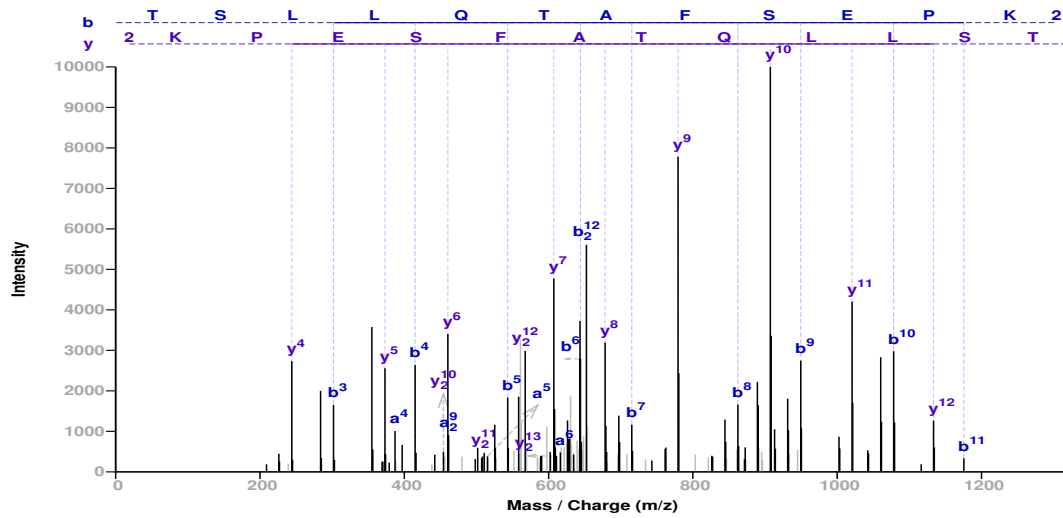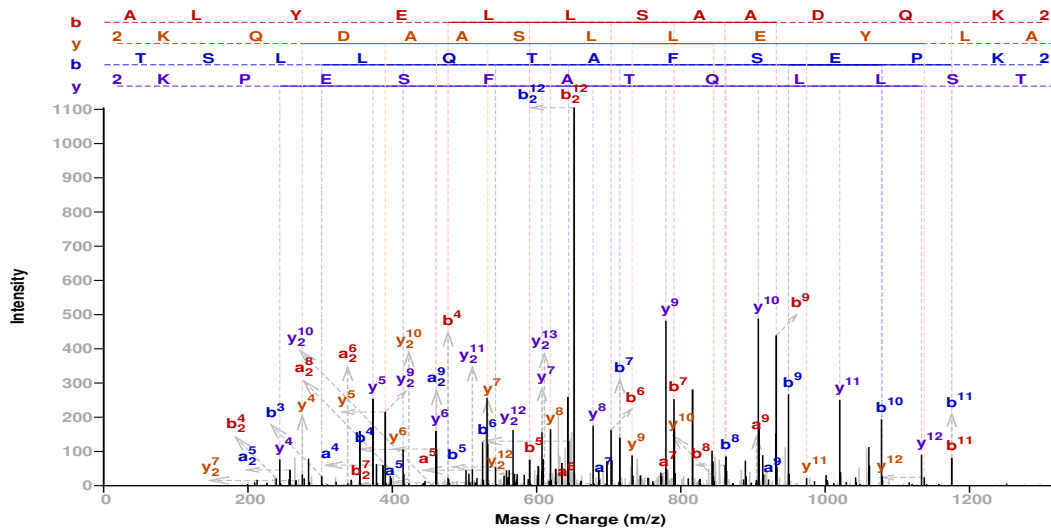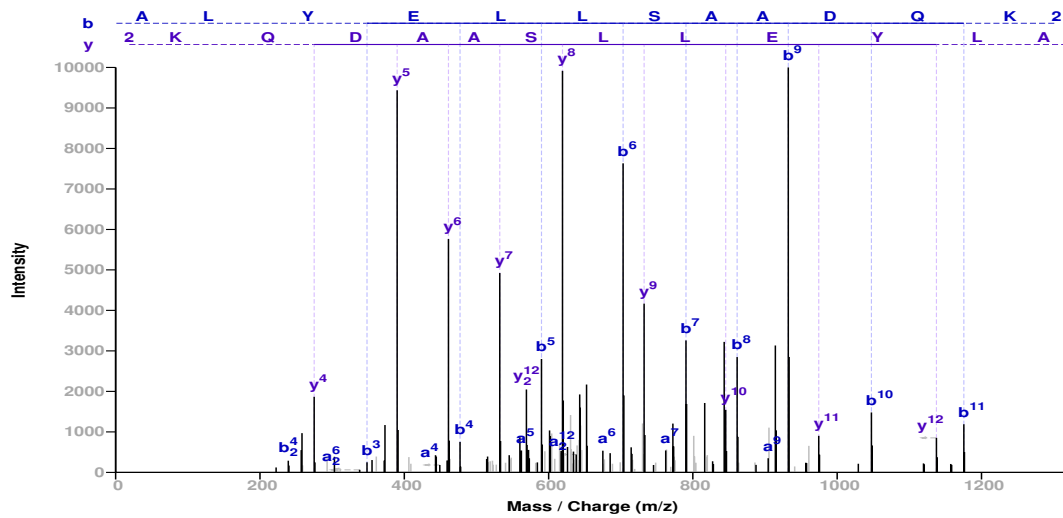

yeast3.Scan\_Number\_5616 Precursor m/z: 562.814 cosine: 0.746  $\alpha$ : 0.515

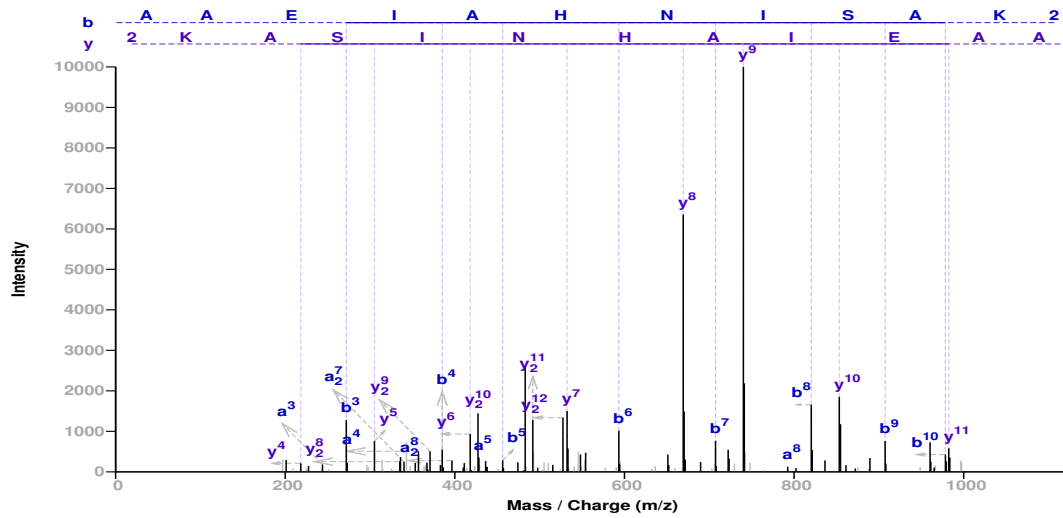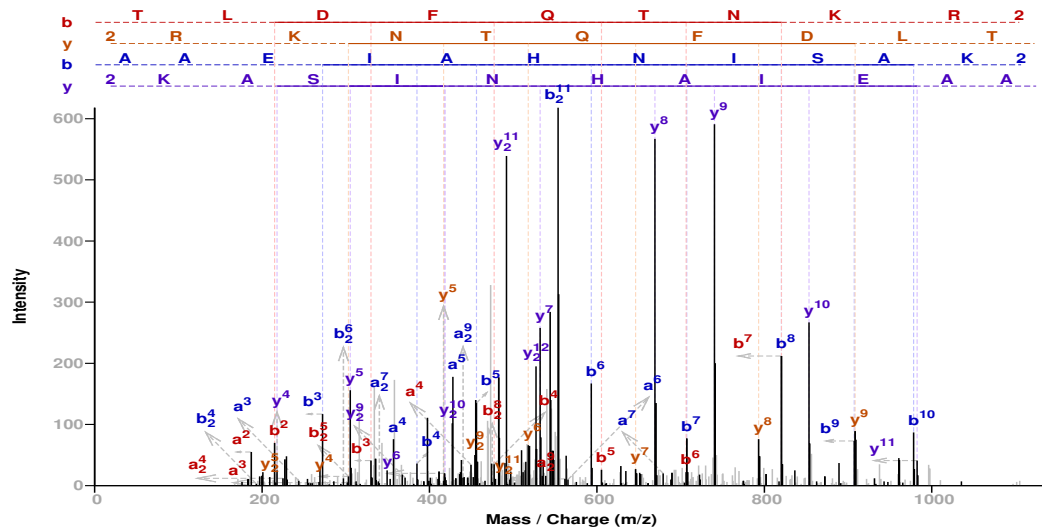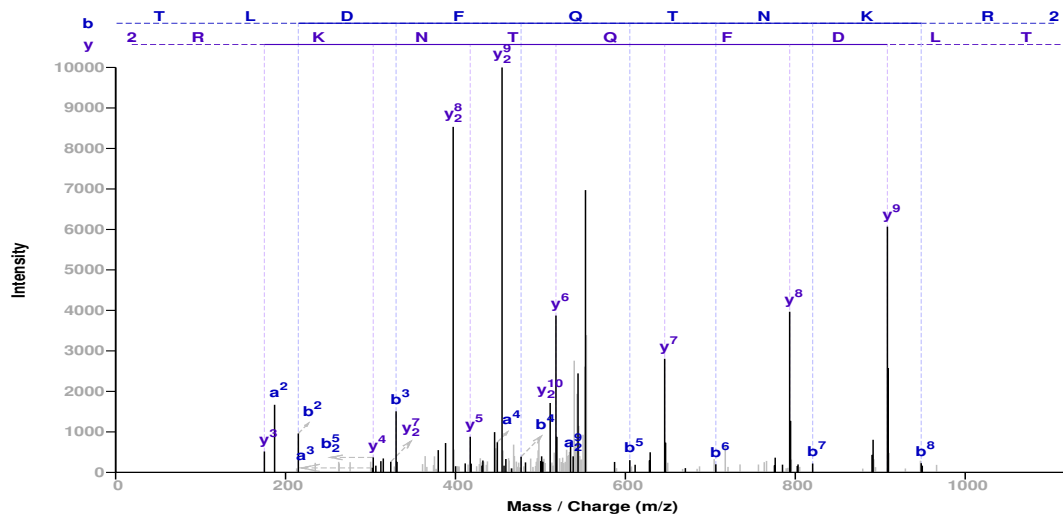

yeast3\_Scan\_Number\_3745 Precursor m/z: 565.319 cosine: 0.750  $\alpha$ : 0.511

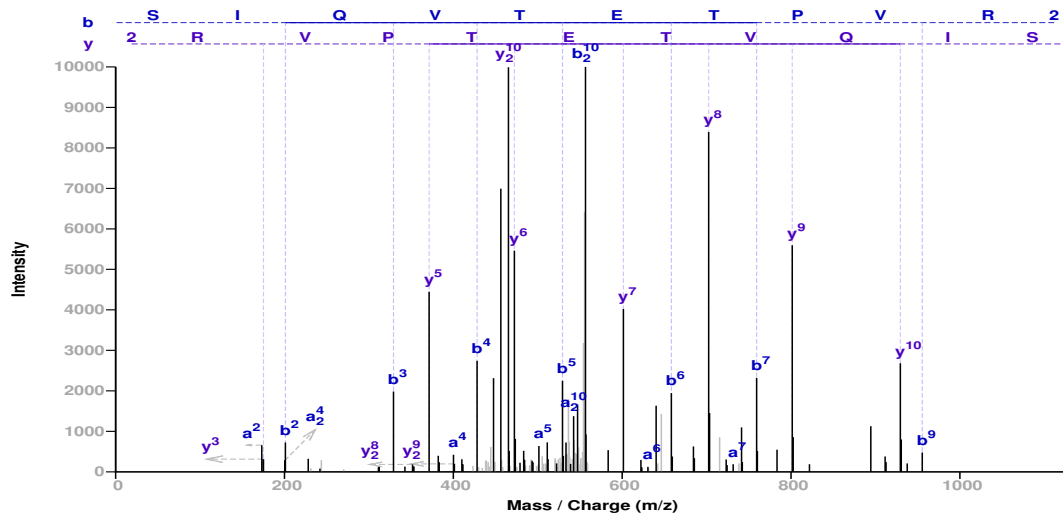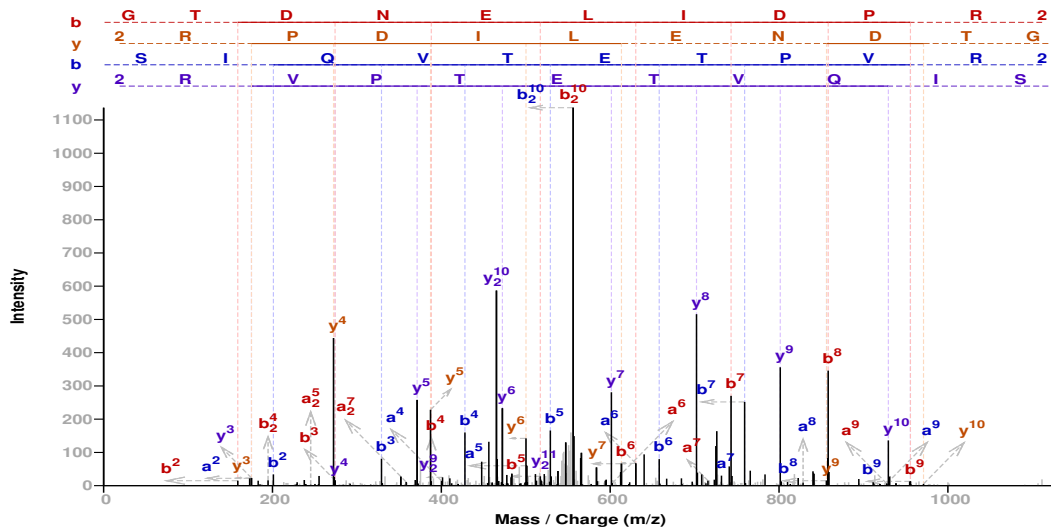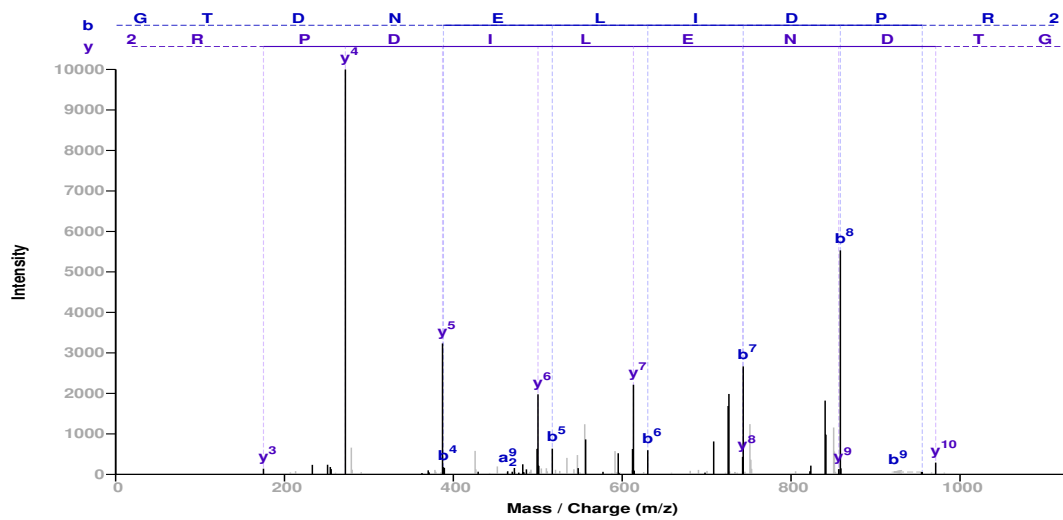





yeast3\_Scan\_Number\_5054 Precursor m/z: 596.313 cosine: 0.847  $\alpha$ : 0.510

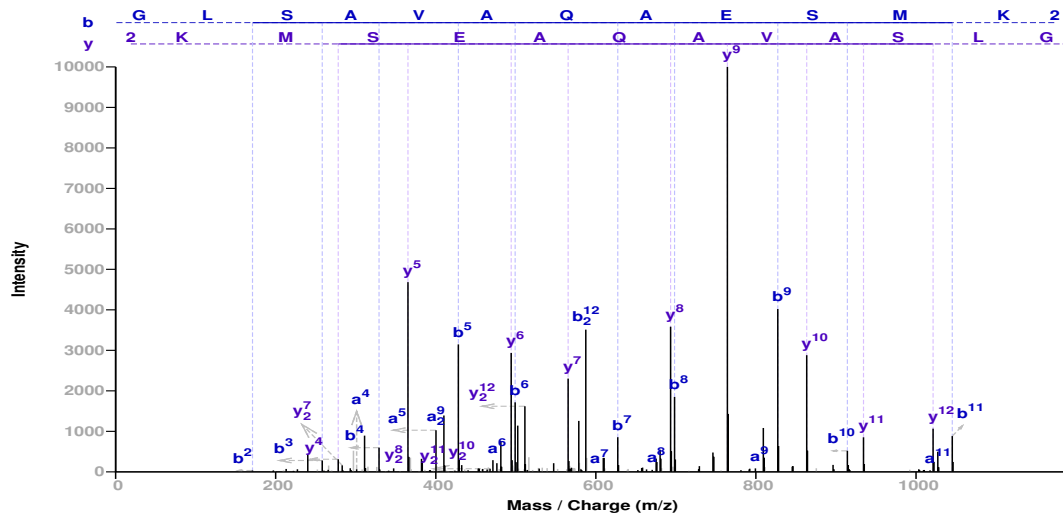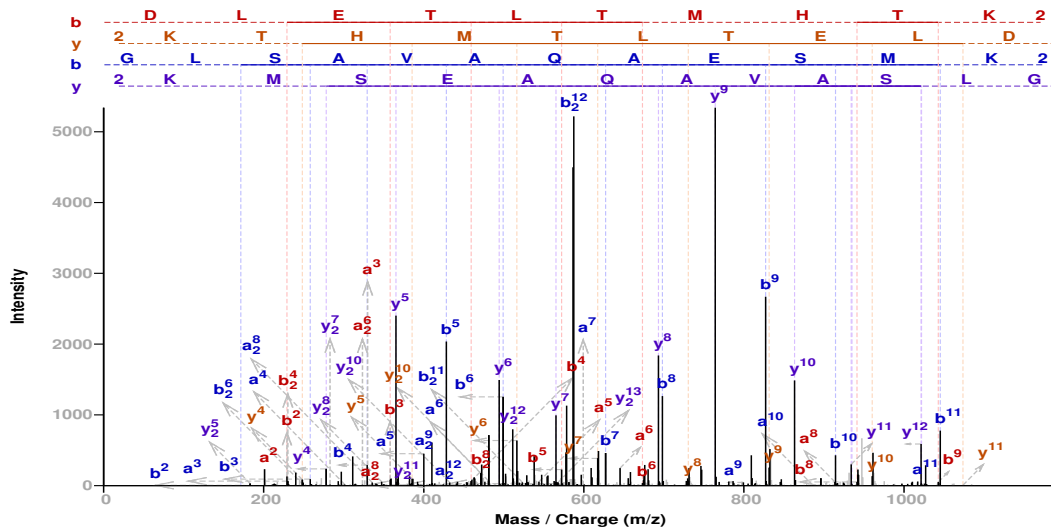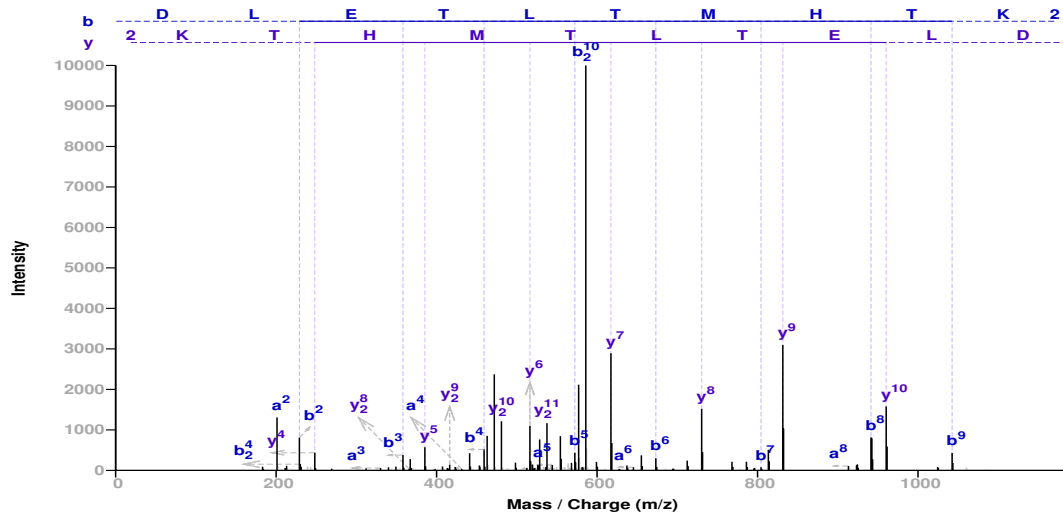

yeast3\_Scan\_Number\_5849 Precursor m/z: 799.918 cosine: 0.866  $\alpha$ : 0.499

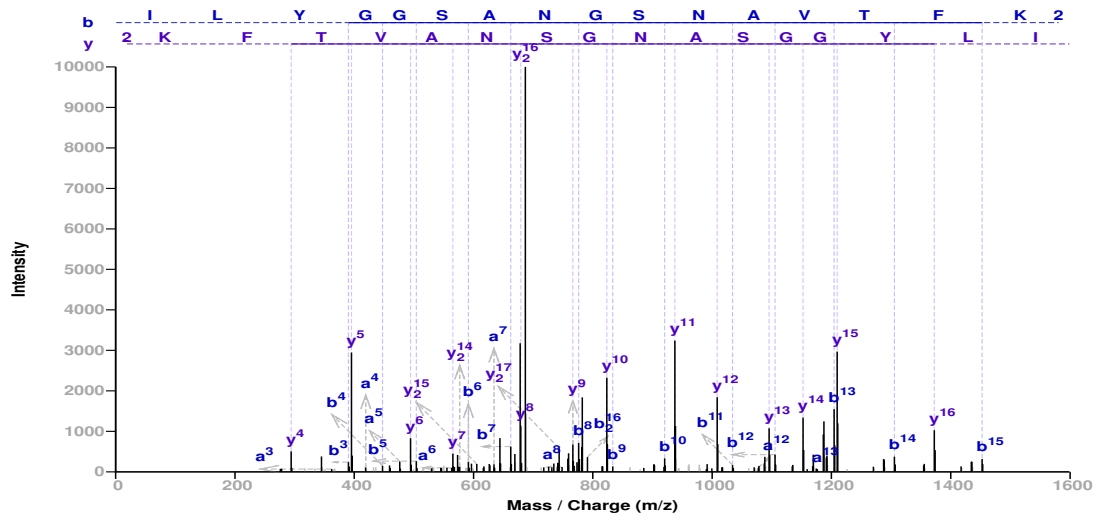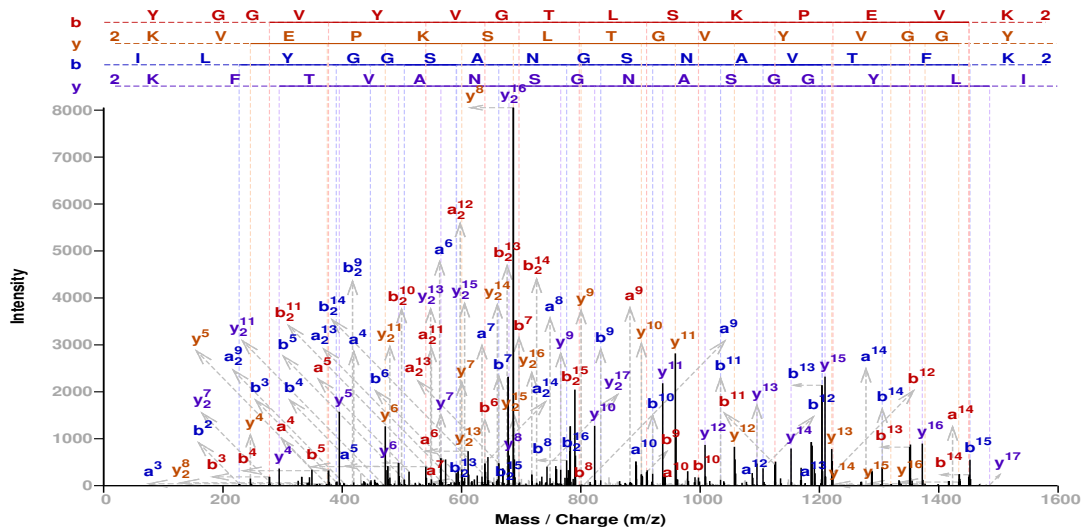

yeast3\_Scan\_Number\_1881 Precursor m/z: 467.745 cosine: 0.835  $\alpha$ : 0.495

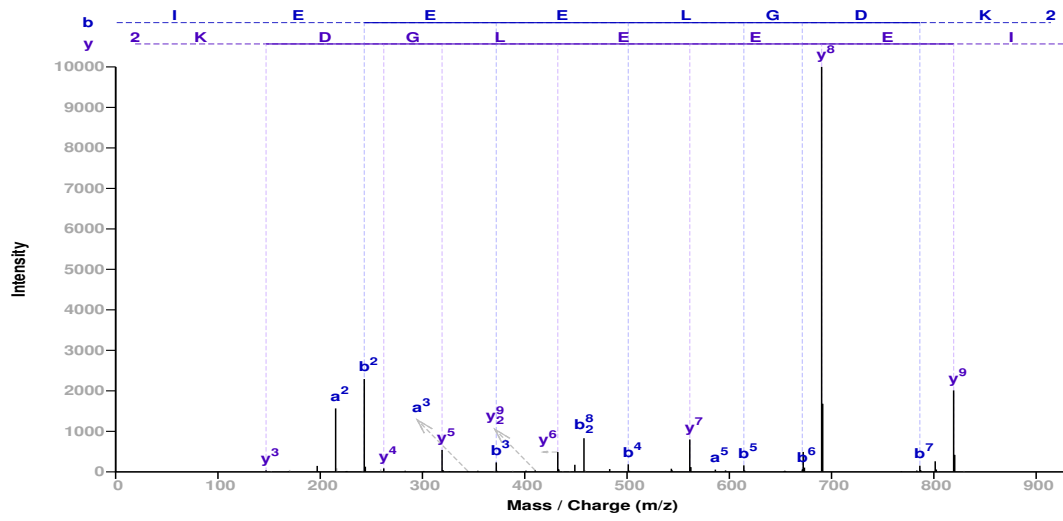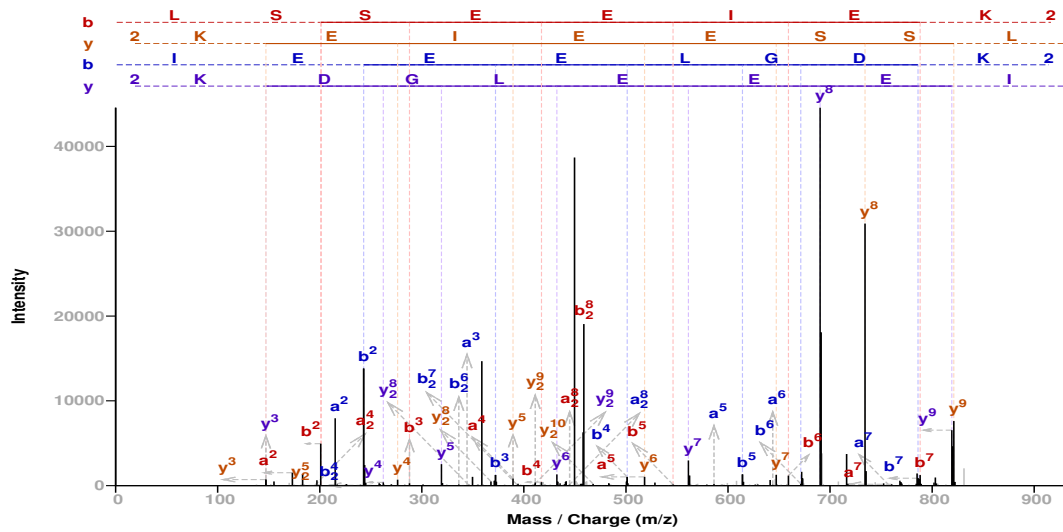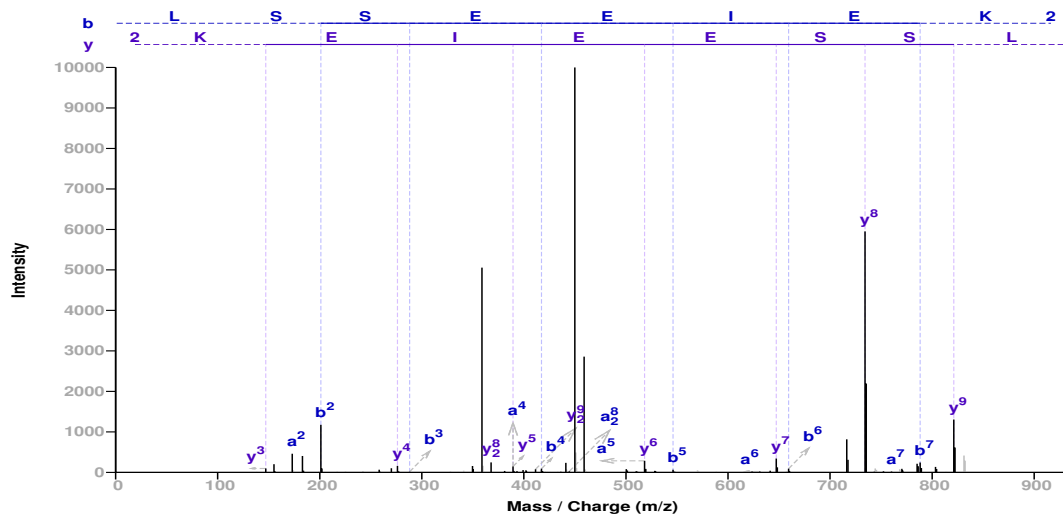

yeast3.Scan\_Number\_2616 Precursor m/z: 567.768 cosine: 0.809  $\alpha$ : 0.480

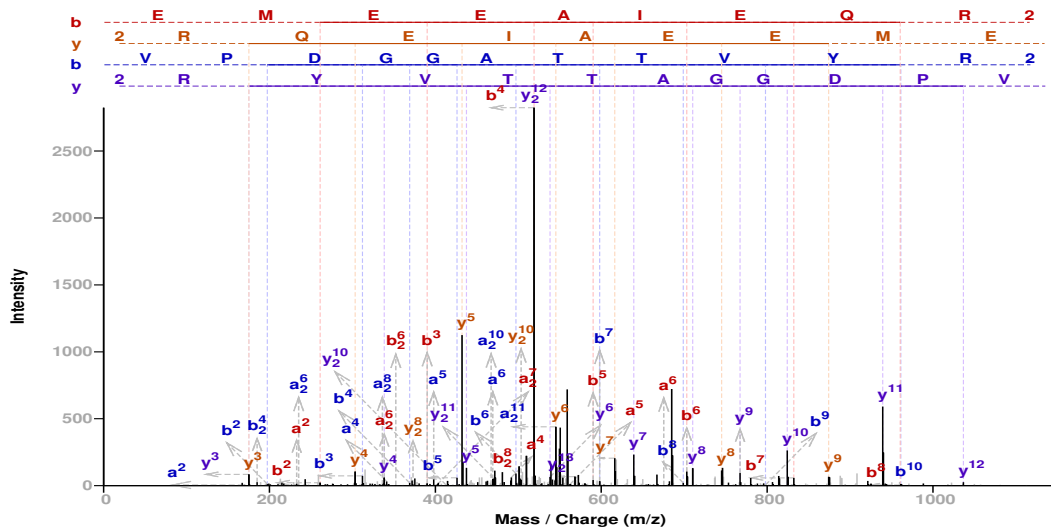

yeast3\_Scan\_Number\_2948 Precursor m/z: 335.539 cosine: 0.809  $\alpha$ : 0.475

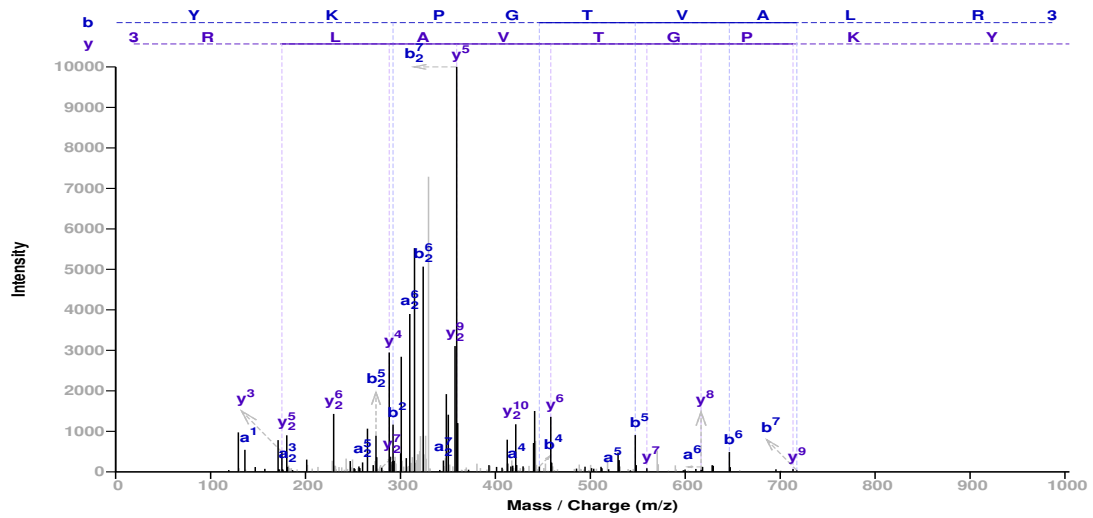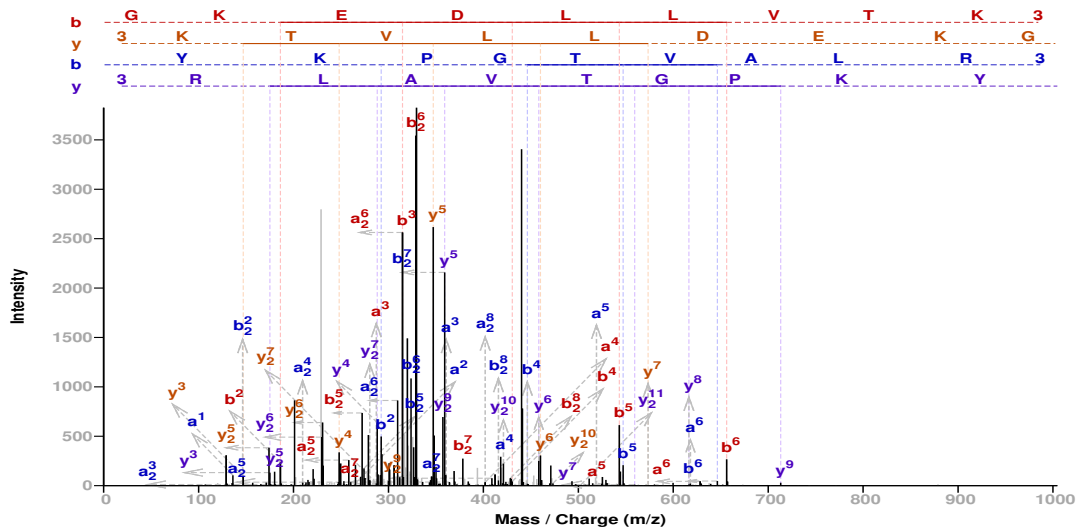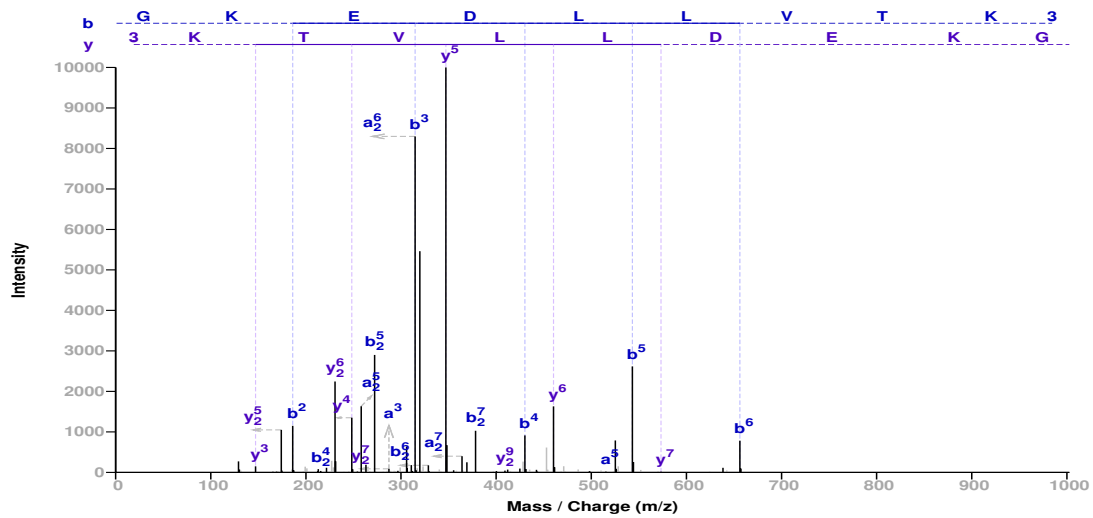

yeast3\_Scan\_Number\_7371 Precursor m/z: 446.763 cosine: 0.922  $\alpha$ : 0.470

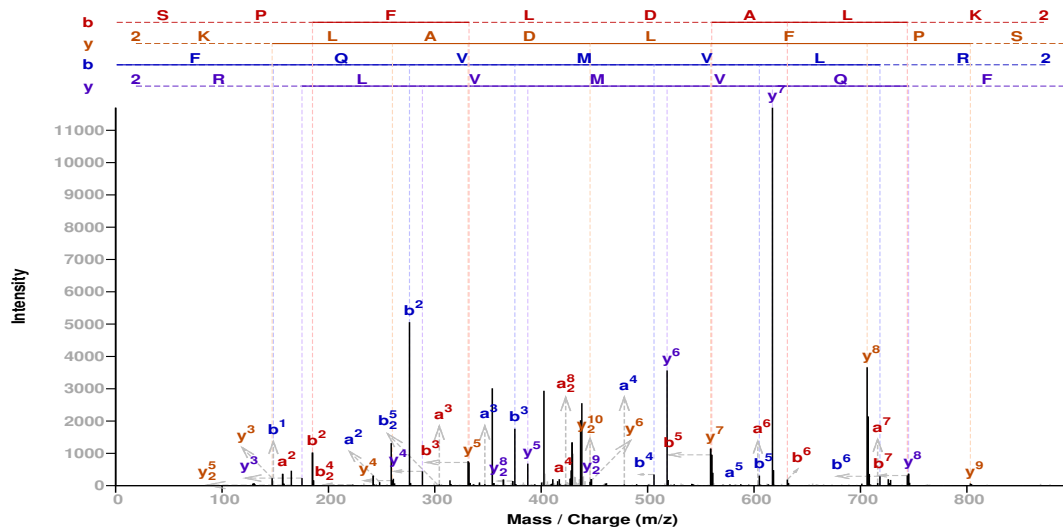

yeast3.Scan\_Number\_2086 Precursor m/z: 441.889 cosine: 0.747  $\alpha$ : 0.469

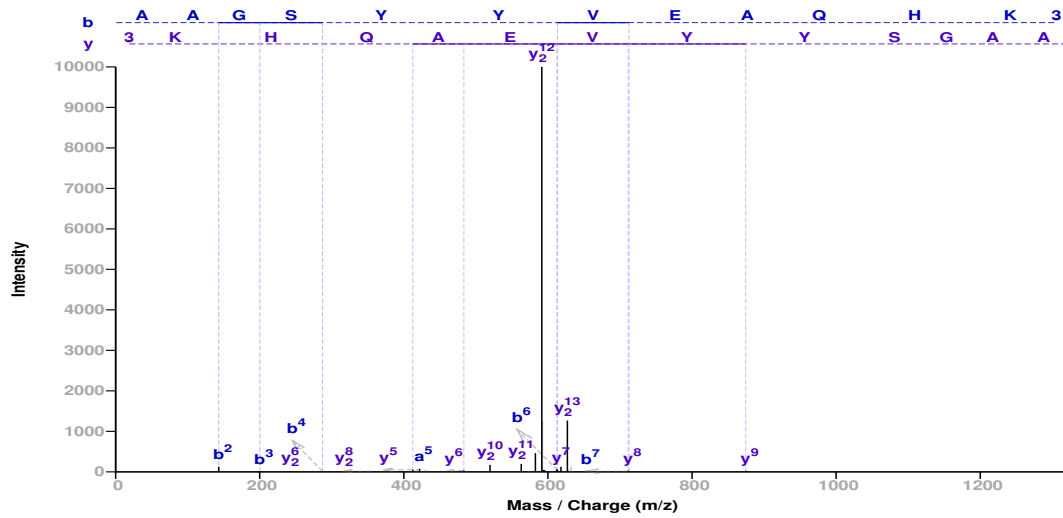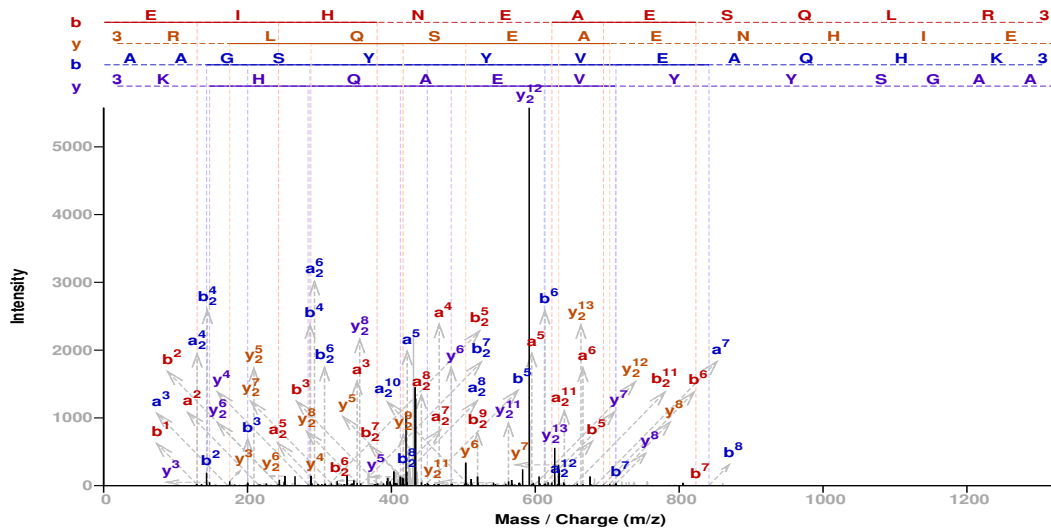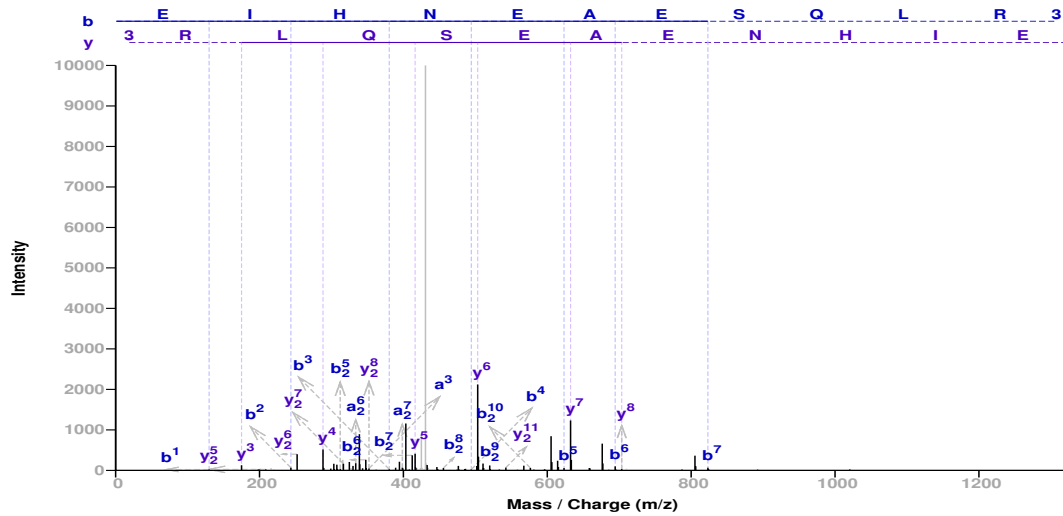



yeast3\_Scan\_Number\_4689 Precursor m/z: 462.579 cosine: 0.884  $\alpha$ : 0.465

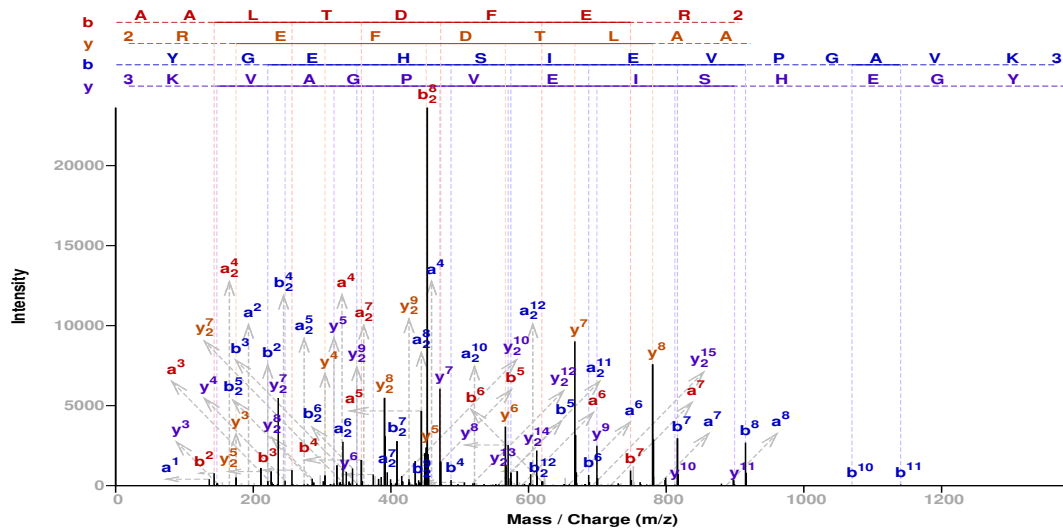

yeast3\_Scan\_Number\_3676 Precursor m/z: 435.217 cosine: 0.792  $\alpha$ : 0.463

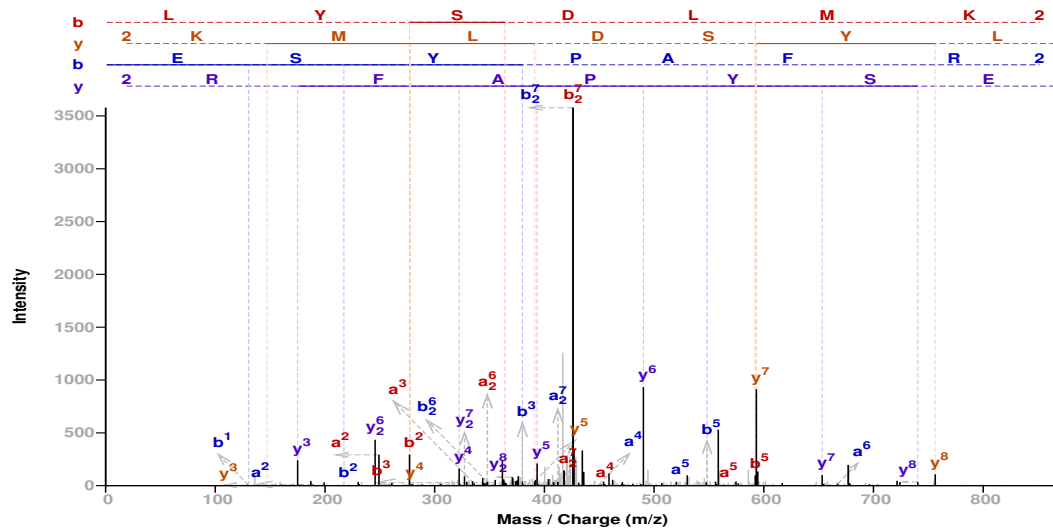

yeast3\_Scan\_Number\_7441 Precursor m/z: 609.317 cosine: 0.731  $\alpha$ : 0.454

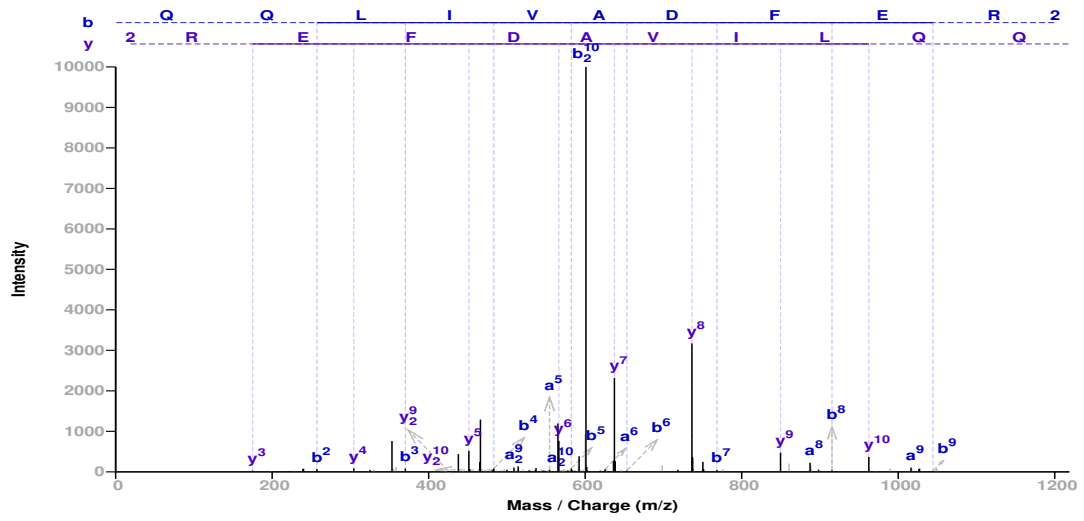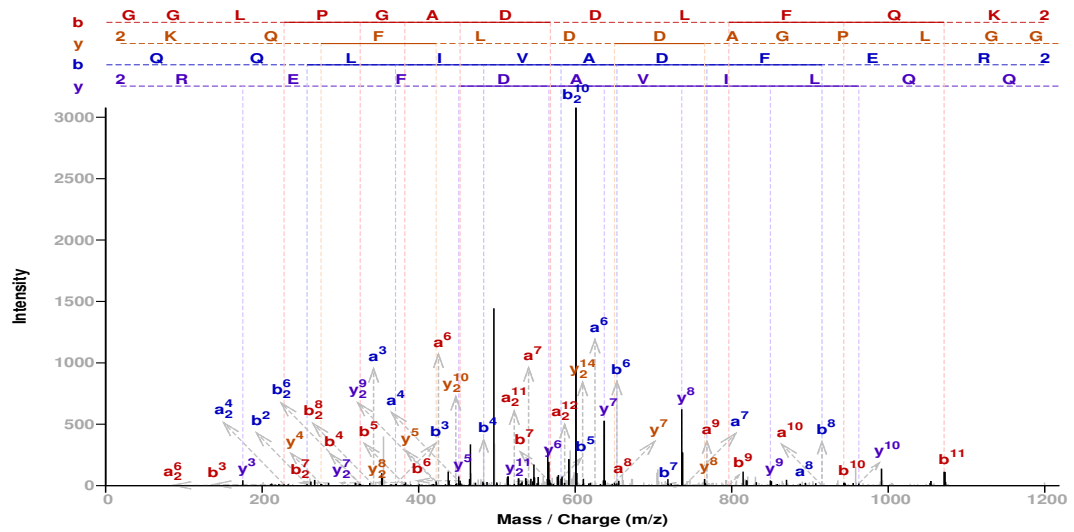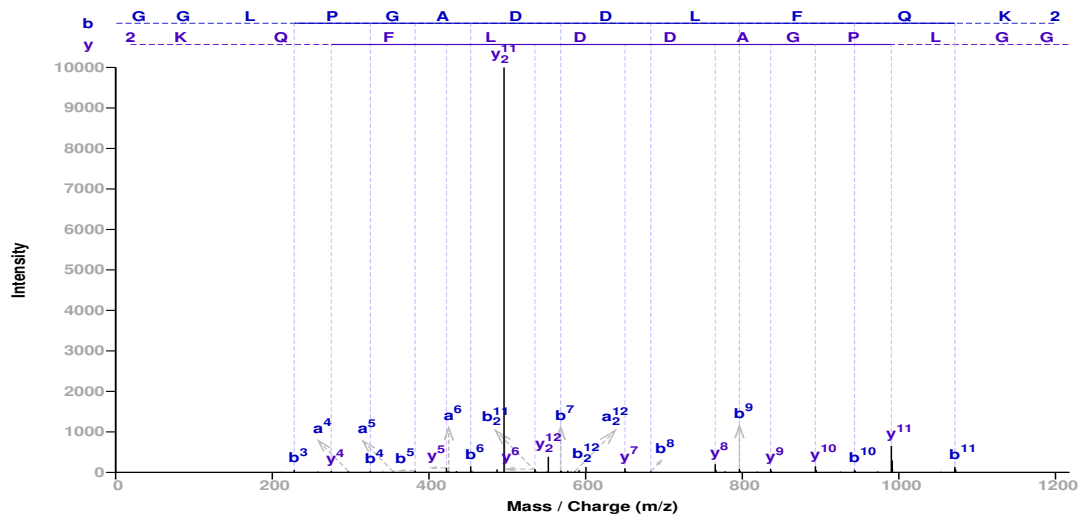

yeast3\_Scan\_Number\_3623 Precursor m/z: 511.254 cosine: 0.767  $\alpha$ : 0.450

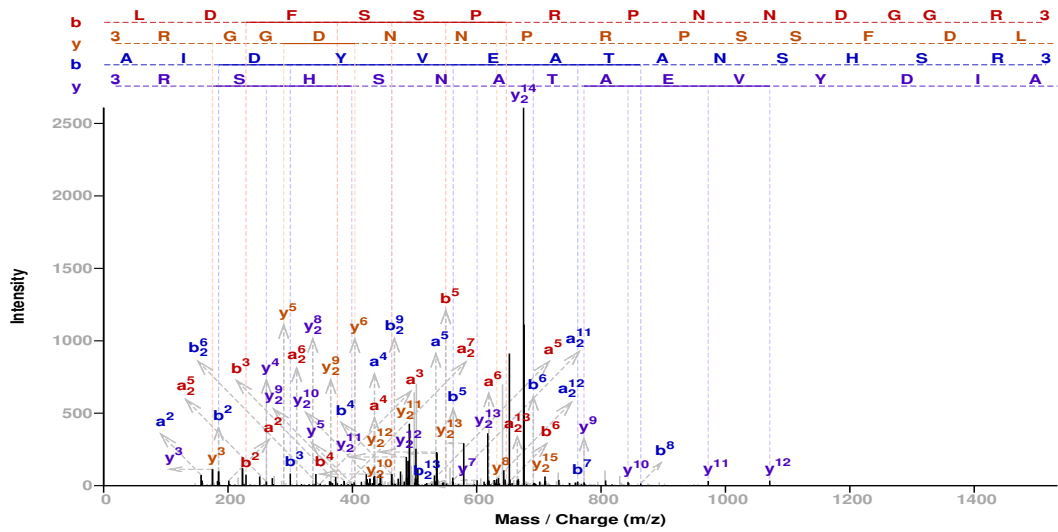

yeast3\_Scan\_Number\_2651 Precursor m/z: 409.230 cosine: 0.887  $\alpha$ : 0.447

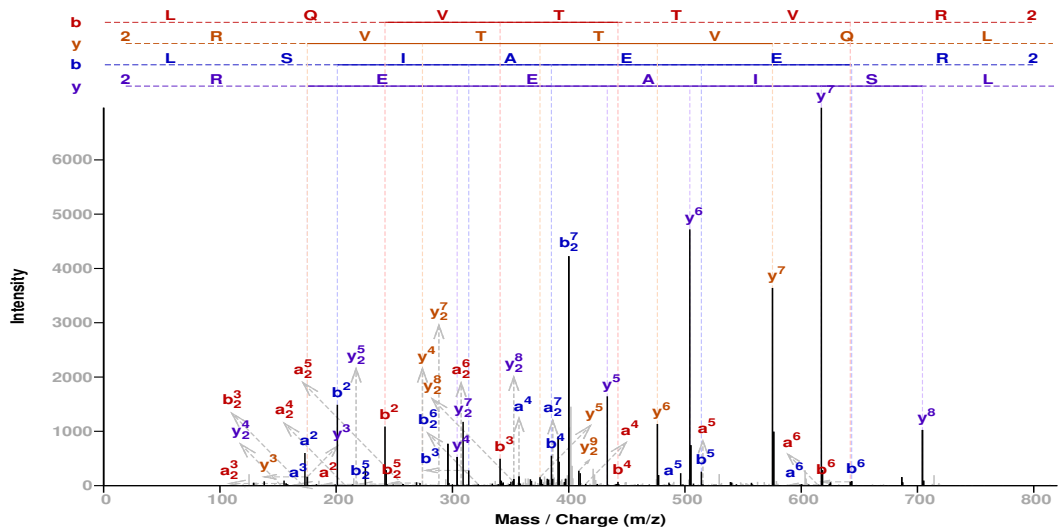

yeast3\_Scan\_Number\_5044 Precursor m/z: 488.276 cosine: 0.771  $\alpha$ : 0.445

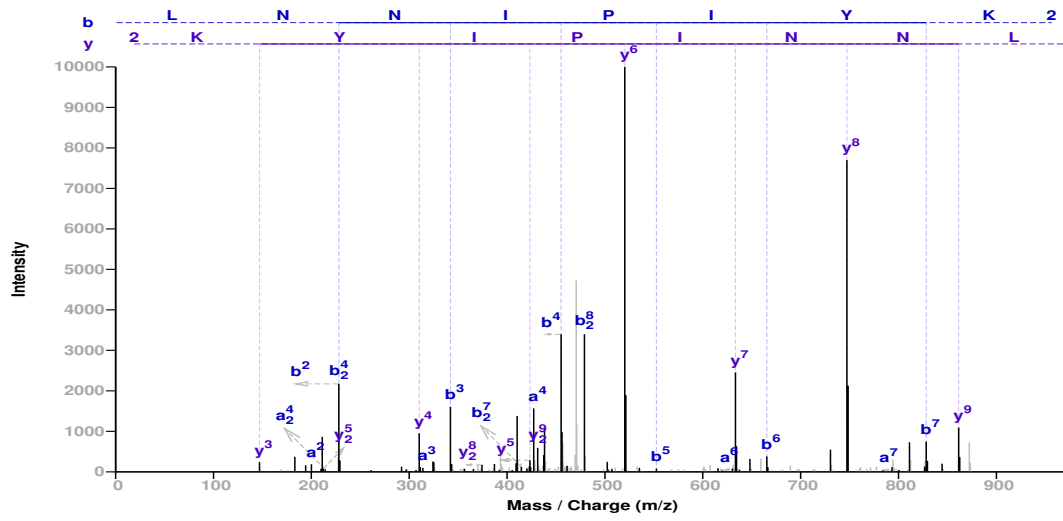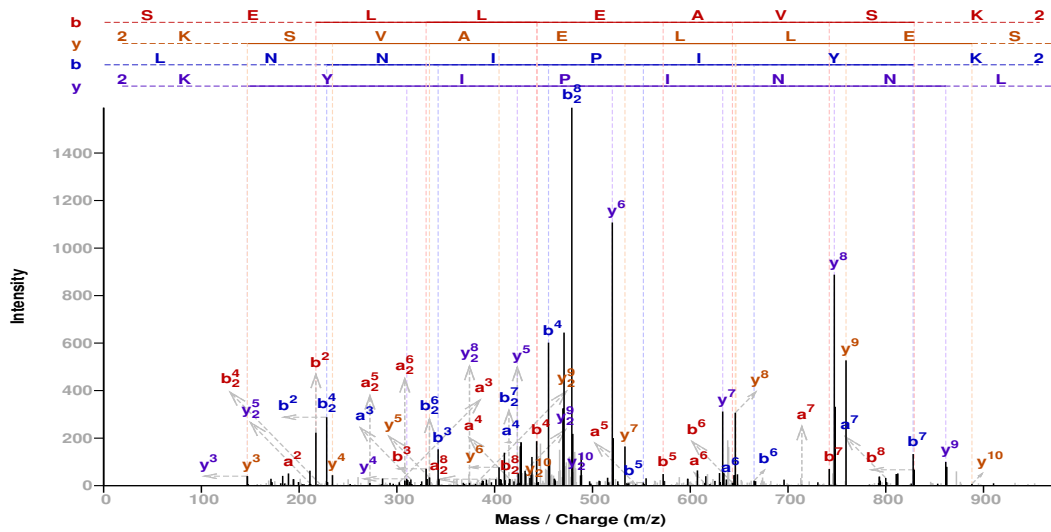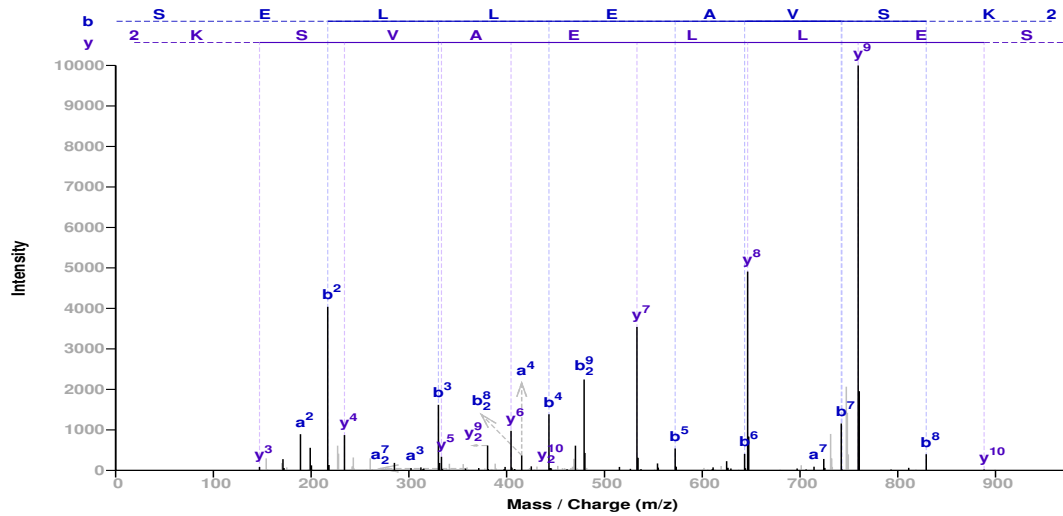

yeast3\_Scan\_Number\_6062 Precursor m/z: 555.357 cosine: 0.849  $\alpha$ : 0.432

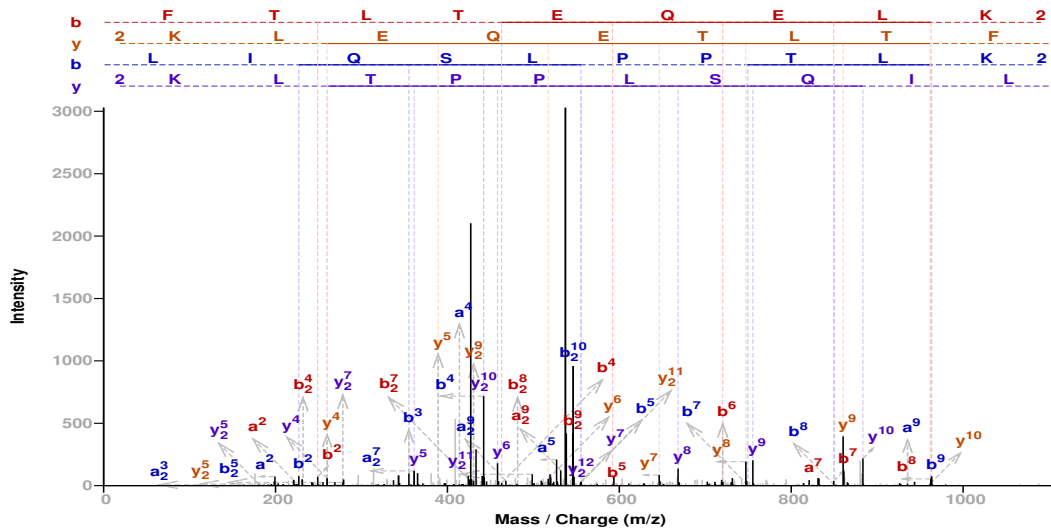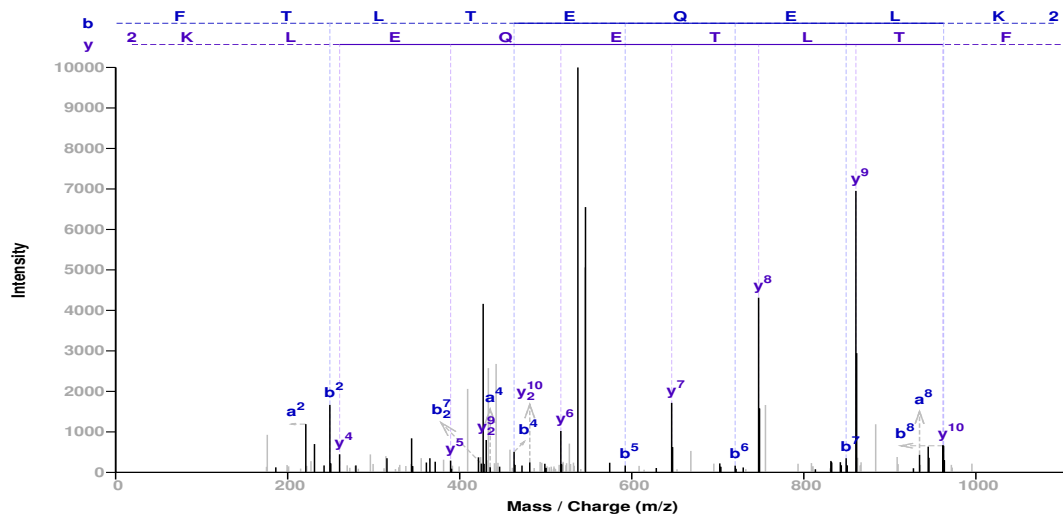

yeast3\_Scan\_Number\_4483 Precursor m/z: 636.356 cosine: 0.801  $\alpha$ : 0.427

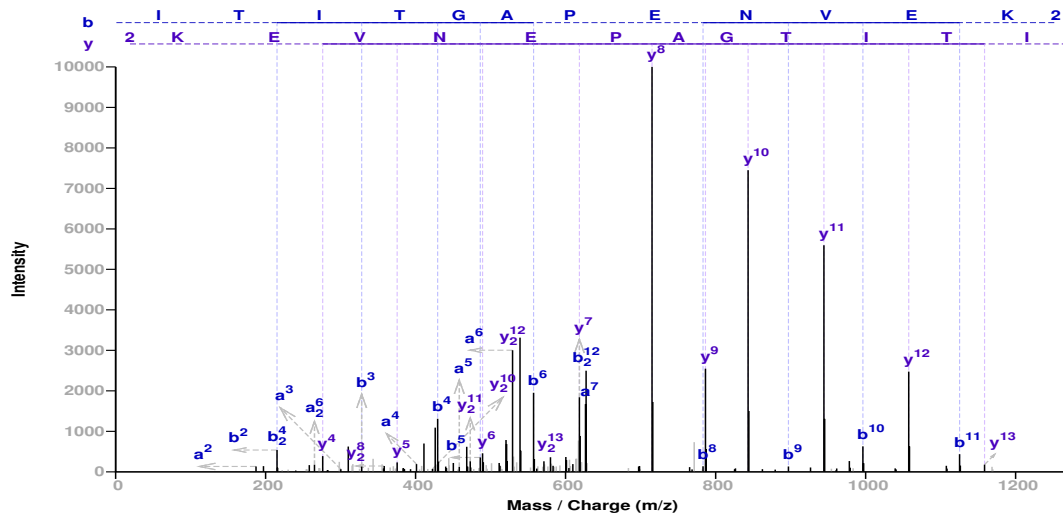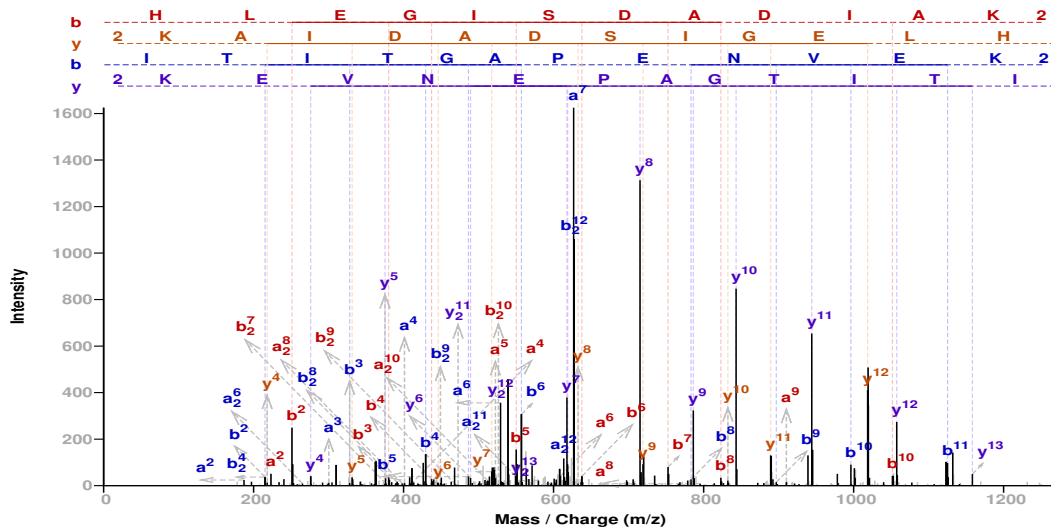



yeast3\_Scan\_Number\_3814 Precursor m/z: 627.828 cosine: 0.799  $\alpha$ : 0.427

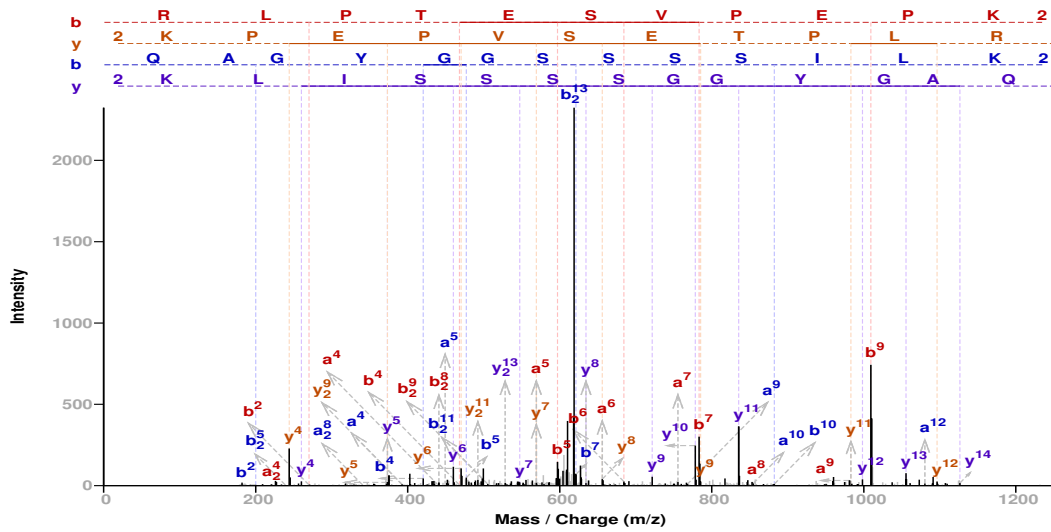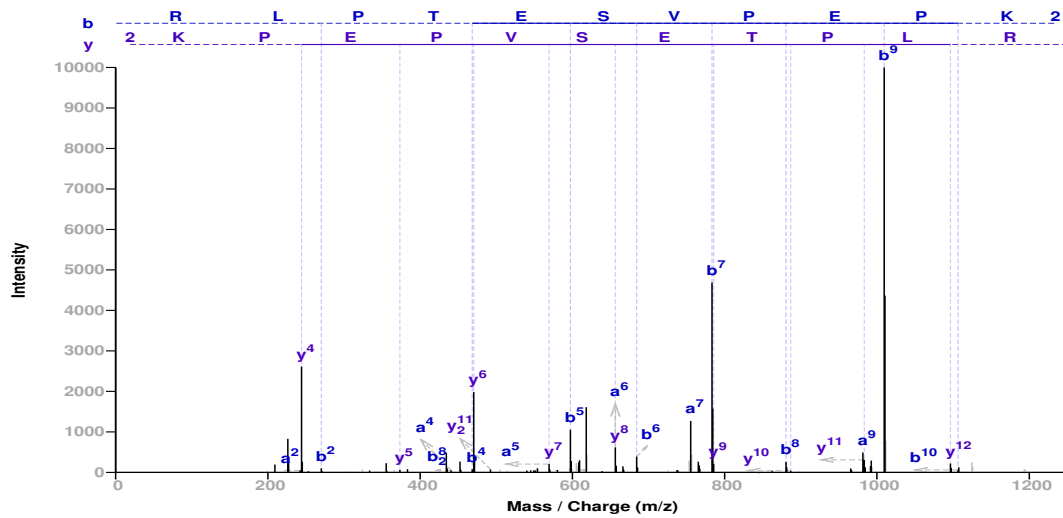



yeast3\_Scan\_Number\_10041 Precursor m/z: 789.916 cosine: 0.769  $\alpha$ : 0.426

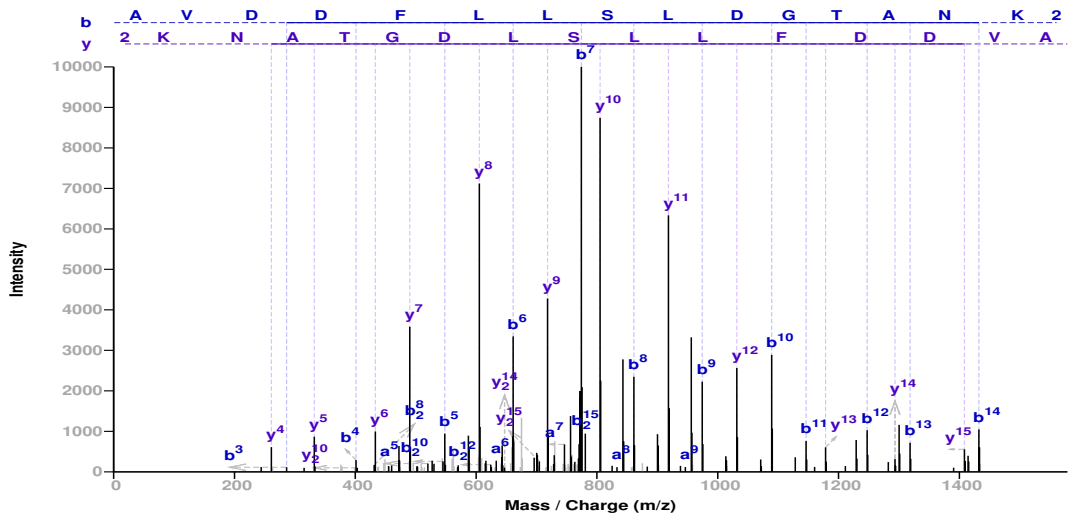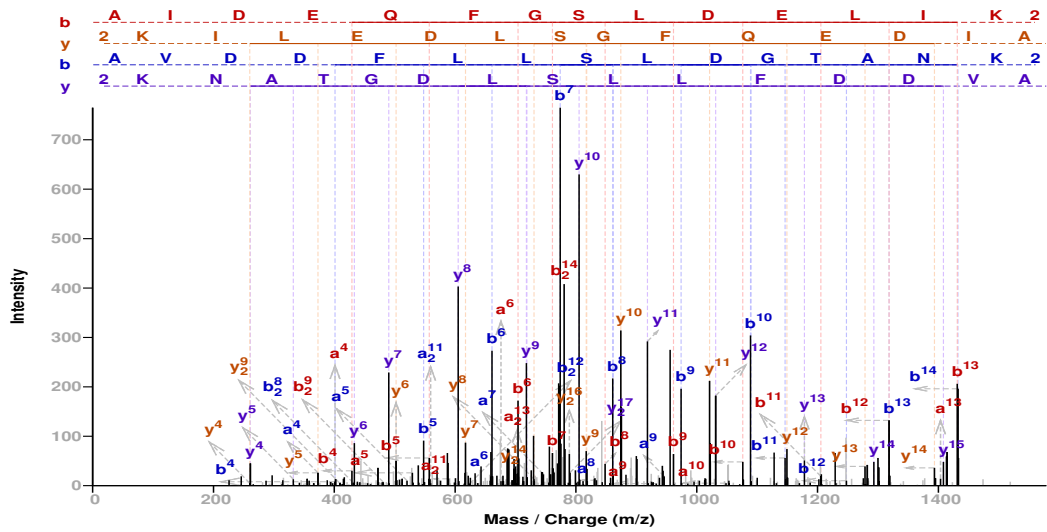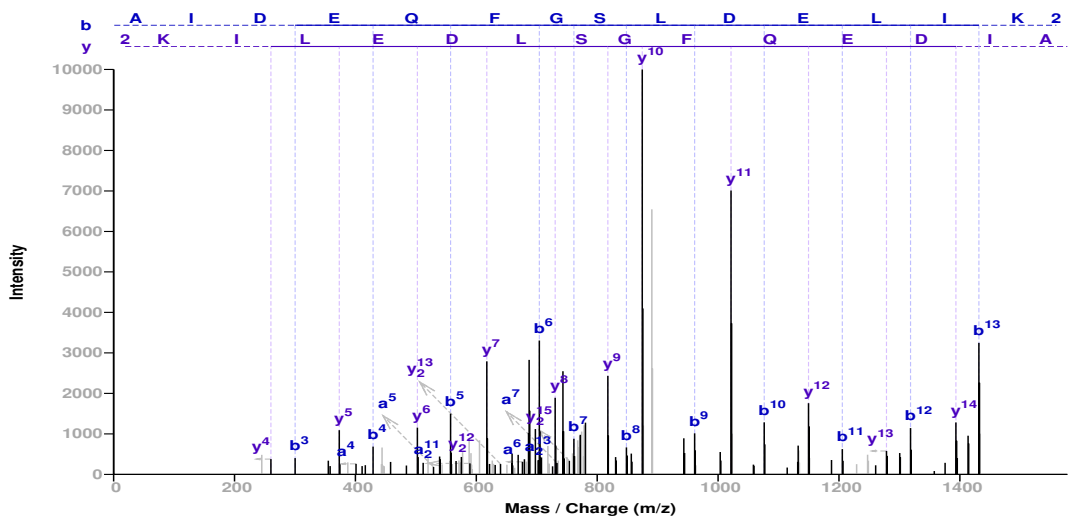

yeast3\_Scan\_Number\_2384 Precursor m/z: 399.200 cosine: 0.814  $\alpha$ : 0.426

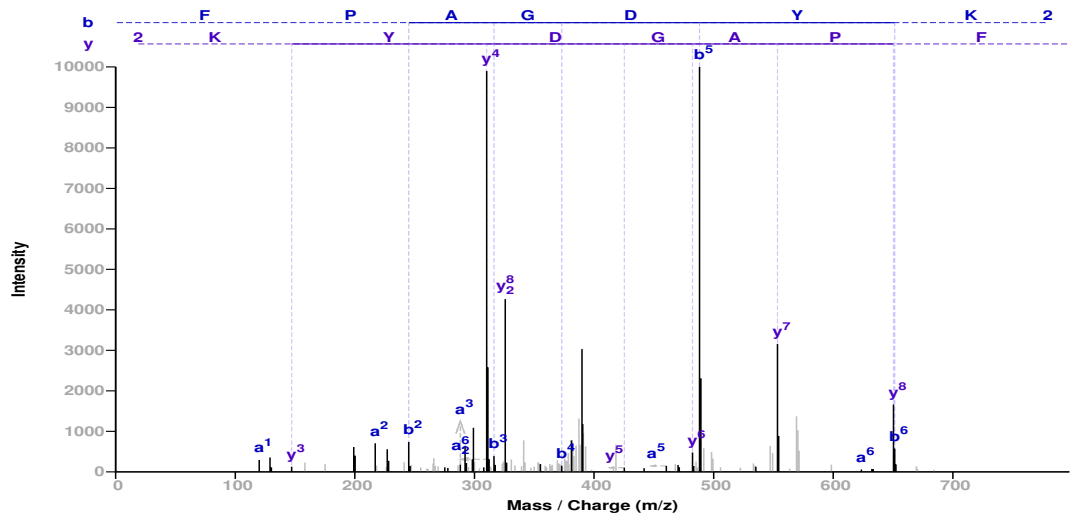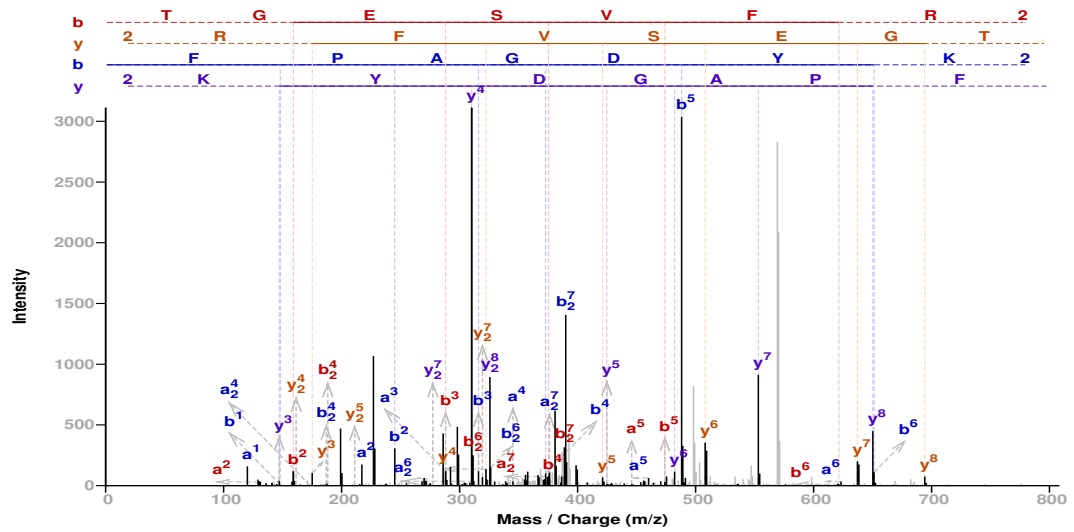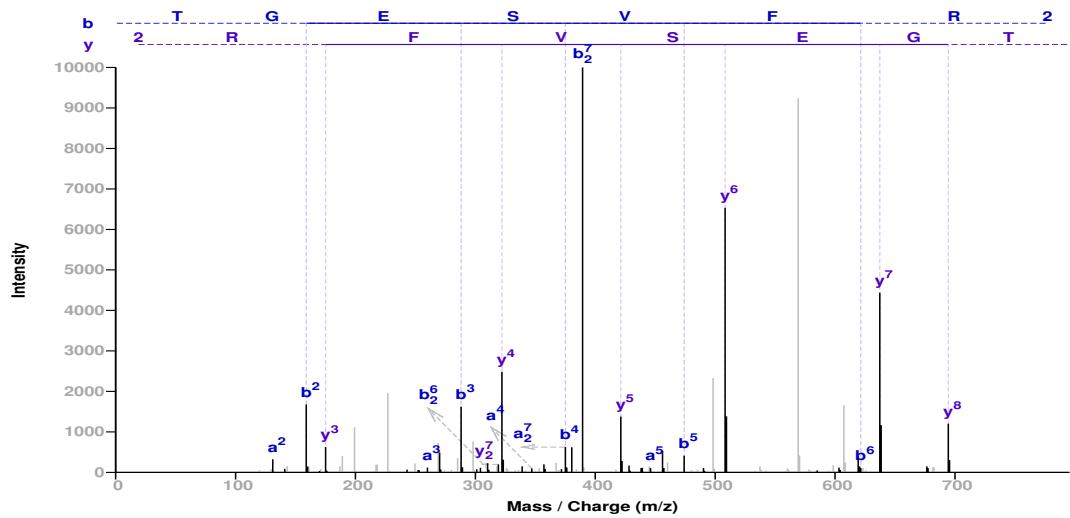



yeast3\_Scan\_Number\_8009 Precursor m/z: 558.832 cosine: 0.791  $\alpha$ : 0.418

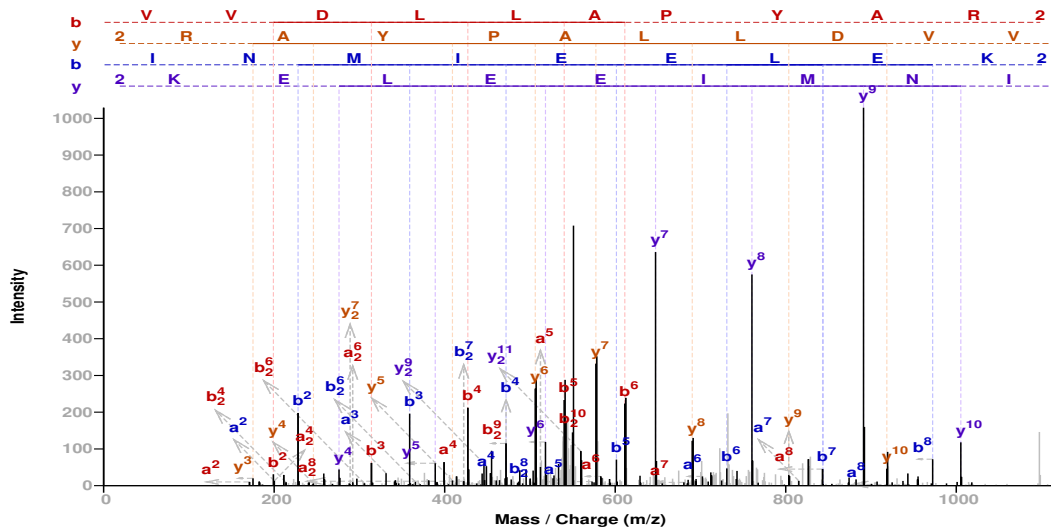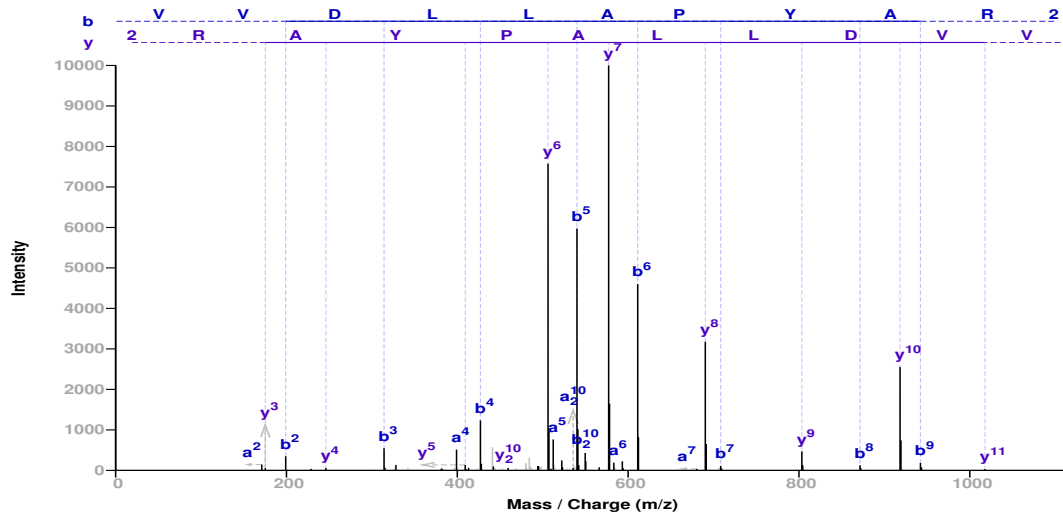

yeast3.Scan\_Number\_5231 Precursor m/z: 388.742 cosine: 0.756  $\alpha$ : 0.417

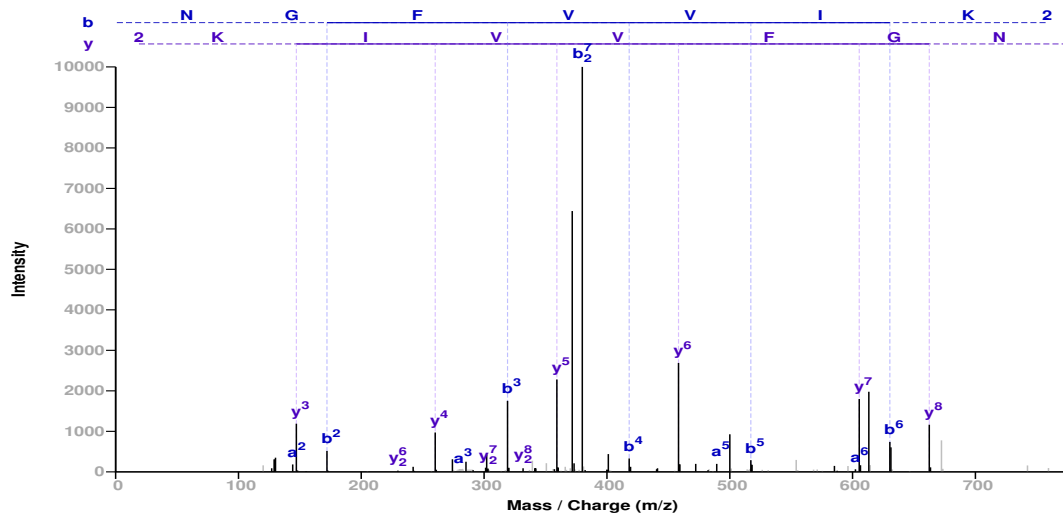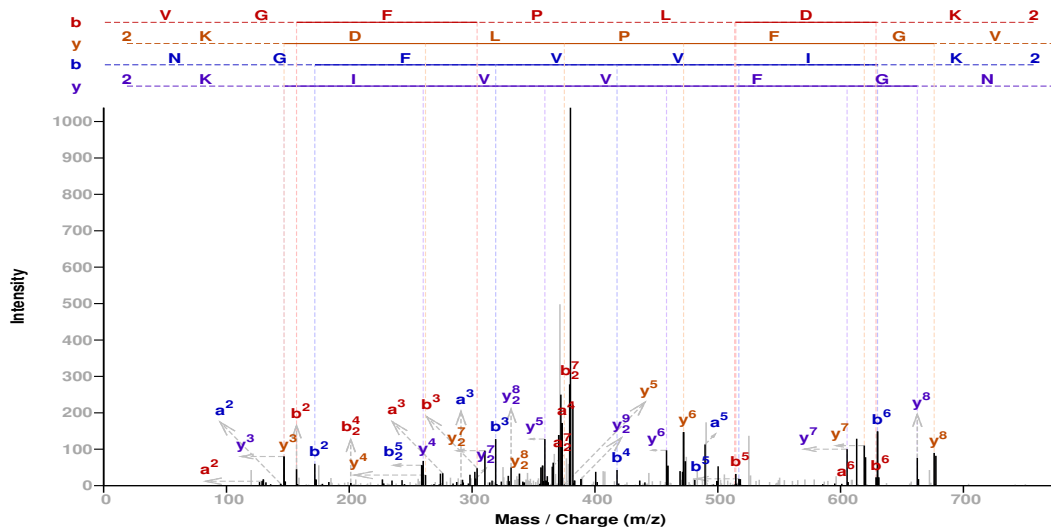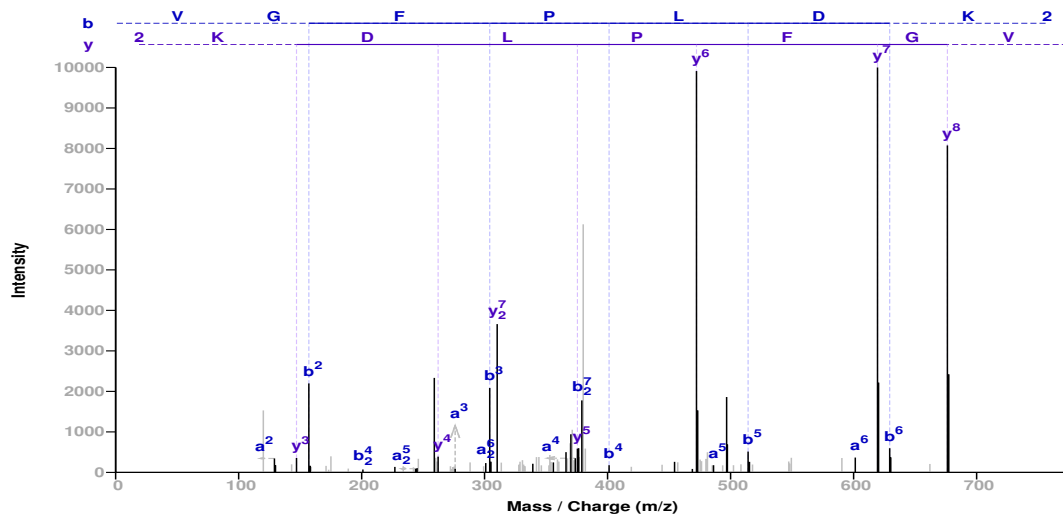

yeast3\_Scan\_Number\_6646 Precursor m/z: 530.768 cosine: 0.835  $\alpha$ : 0.414

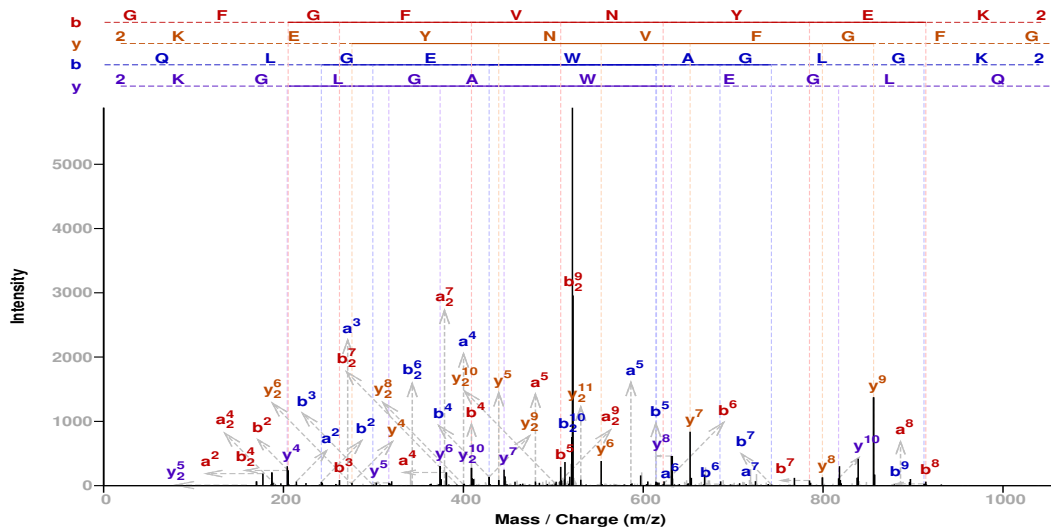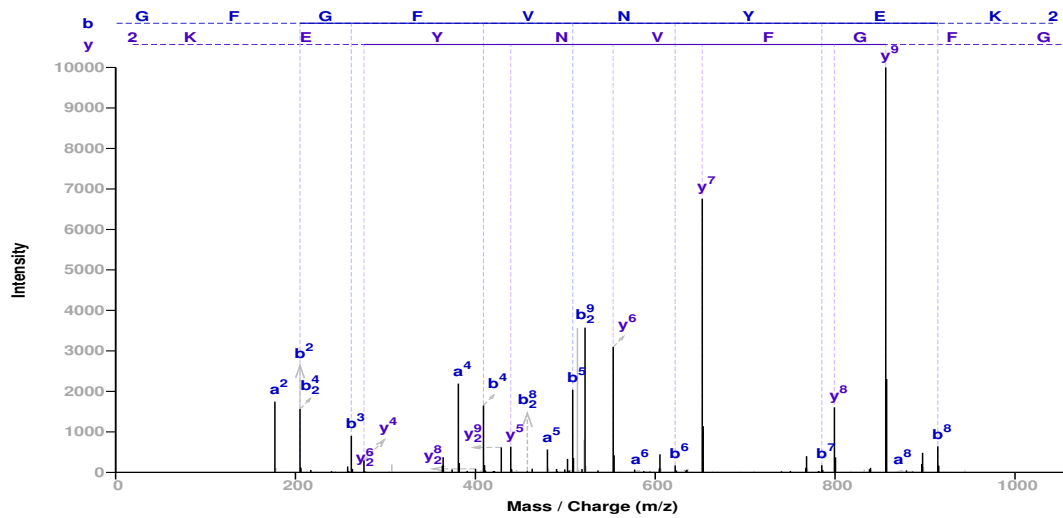



yeast3\_Scan\_Number\_4909 Precursor m/z: 530.312 cosine: 0.772  $\alpha$ : 0.414

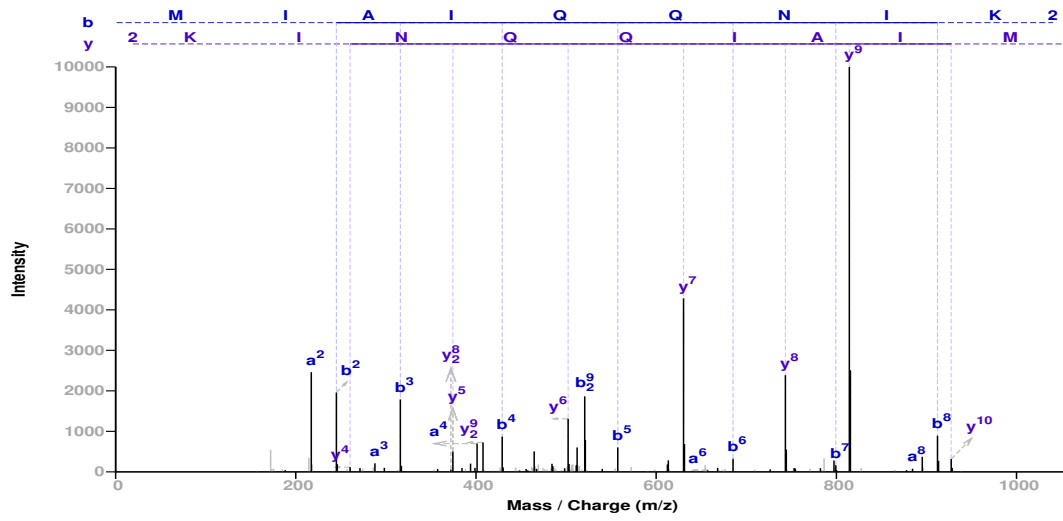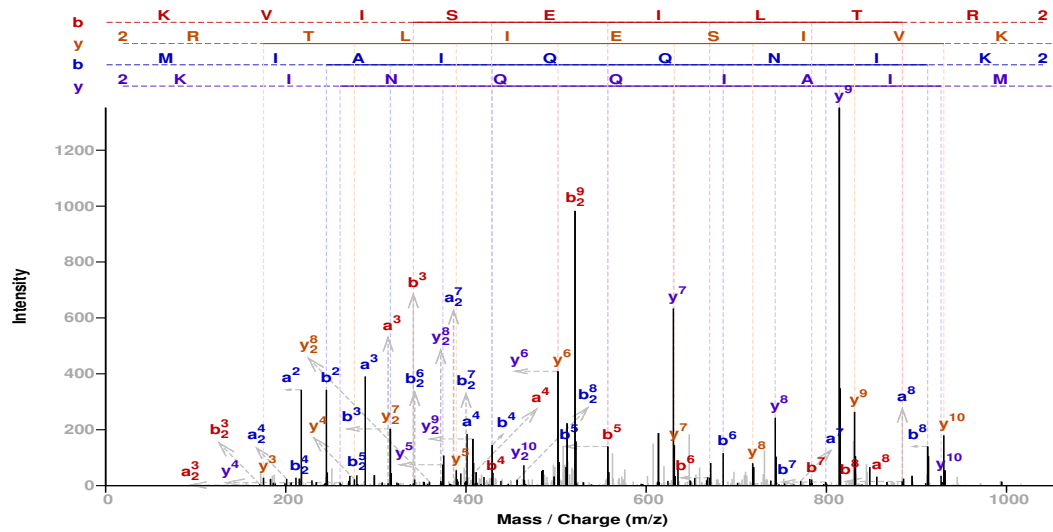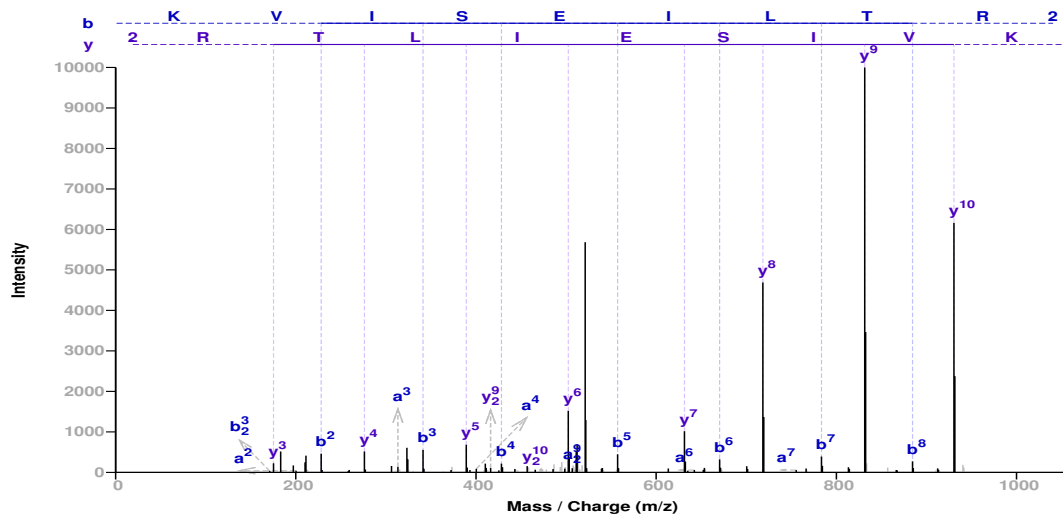



yeast3\_Scan\_Number\_4809 Precursor m/z: 566.272 cosine: 0.748  $\alpha$ : 0.408

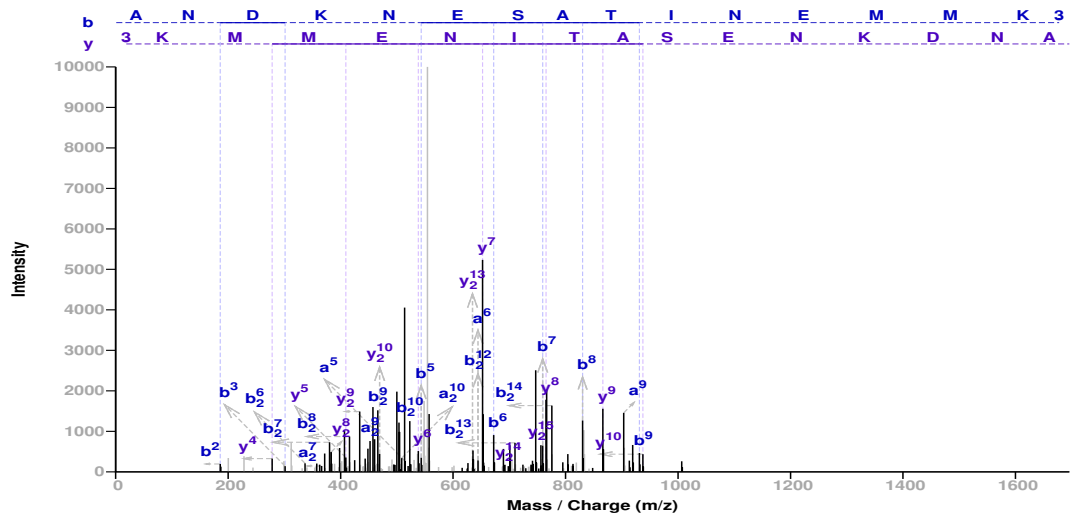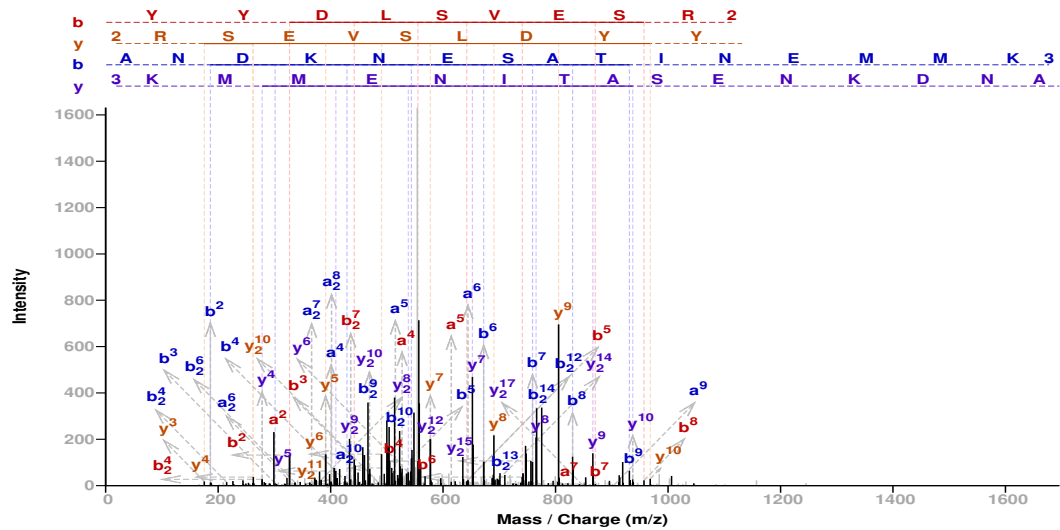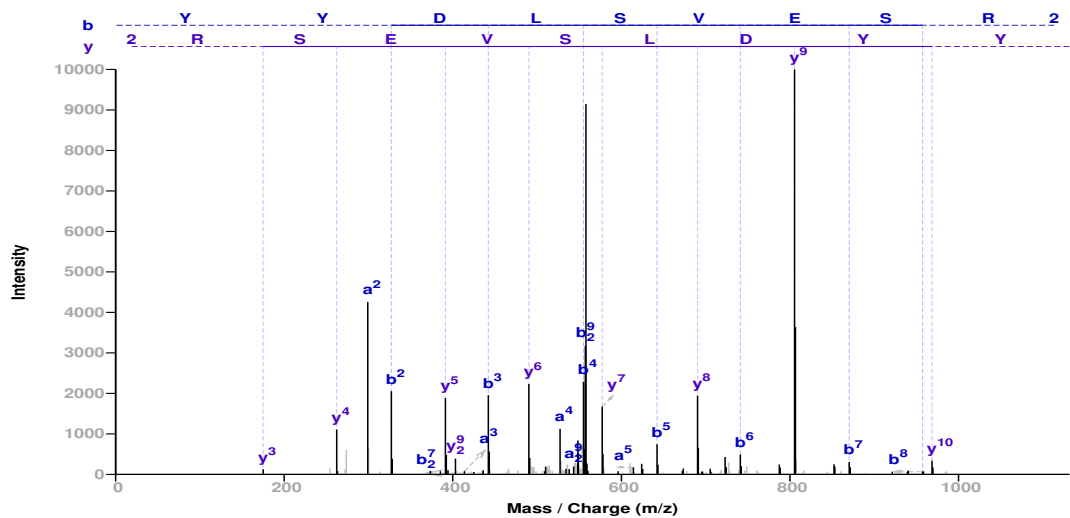

yeast3\_Scan\_Number\_5742 Precursor m/z: 561.794 cosine: 0.783  $\alpha$ : 0.405

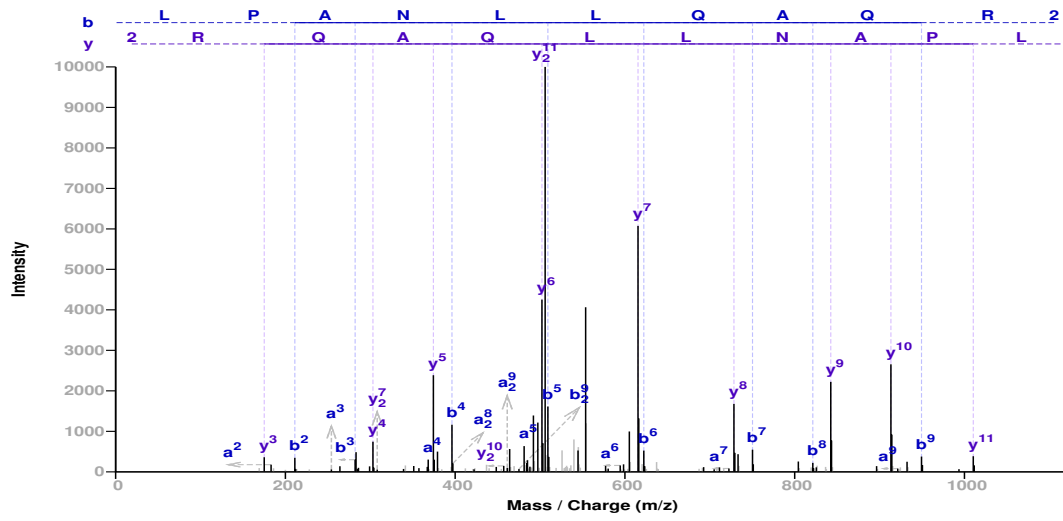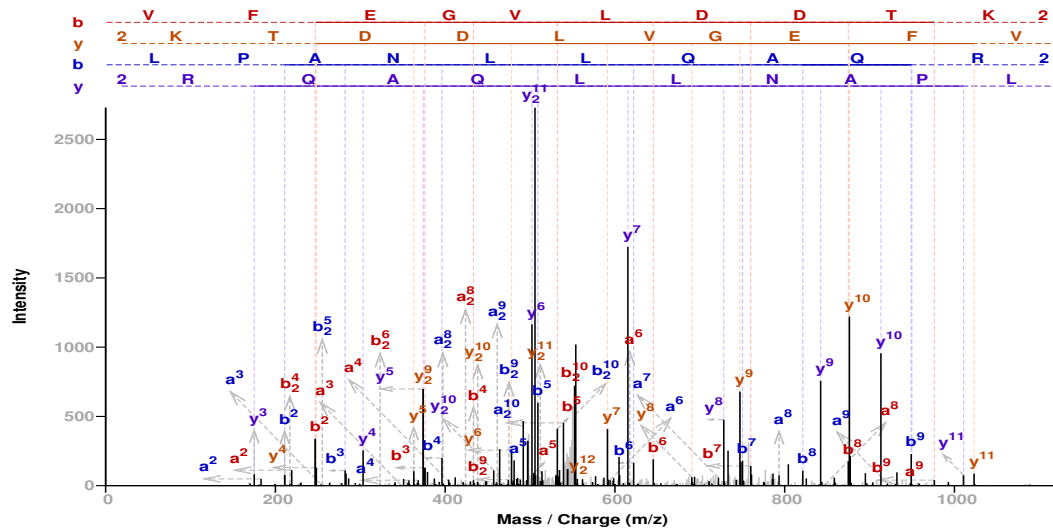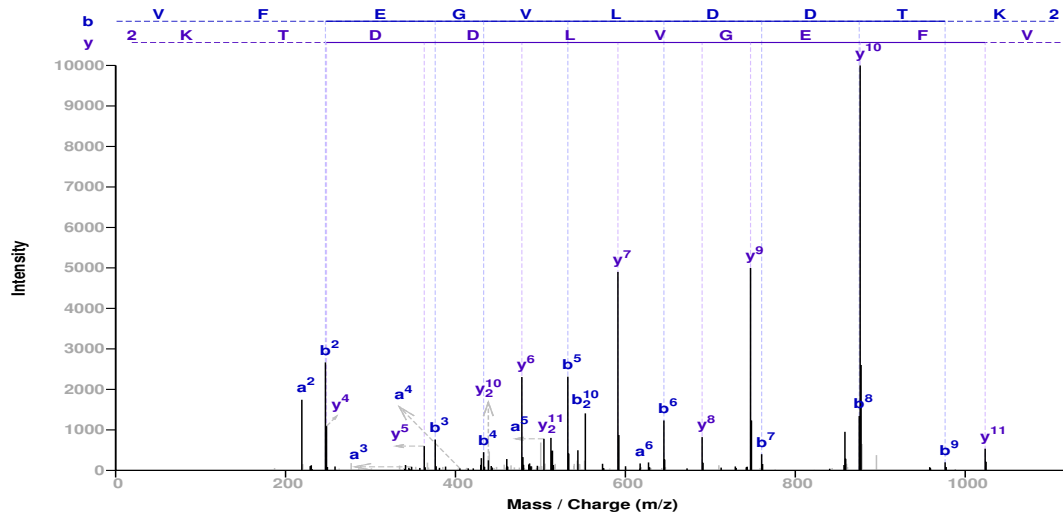

yeast3\_Scan\_Number\_5018 Precursor m/z: 769.890 cosine: 0.784  $\alpha$ : 0.404

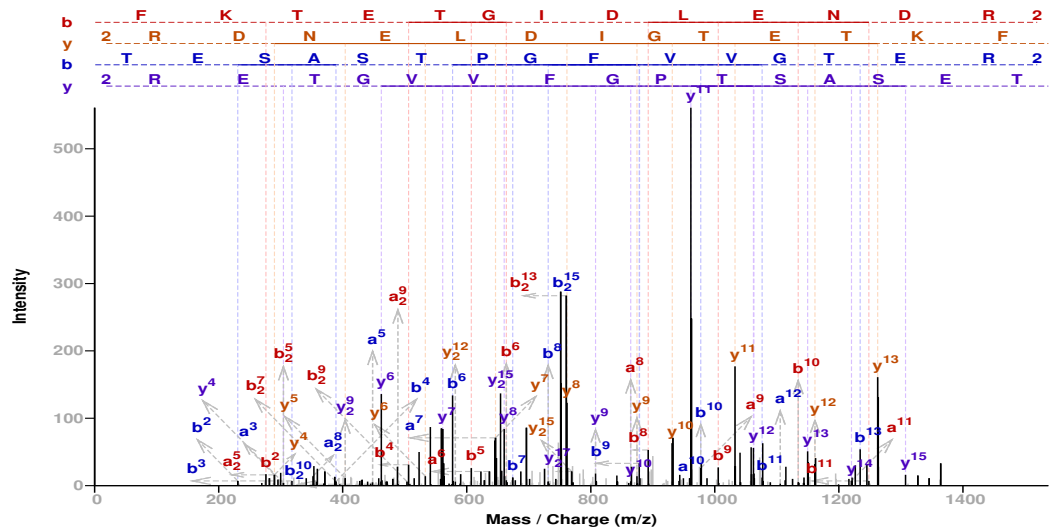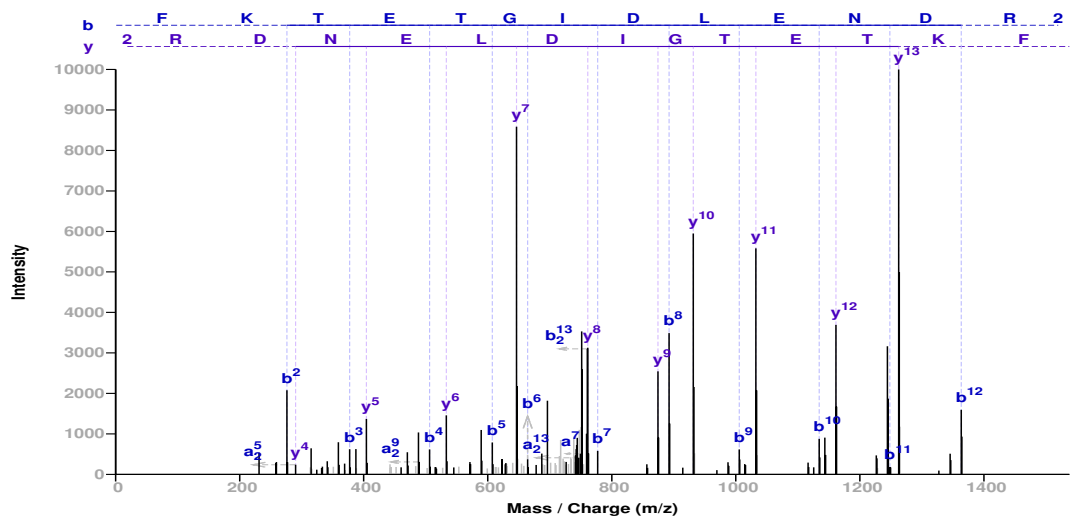

yeast3\_Scan\_Number\_5021 Precursor m/z: 434.231 cosine: 0.800  $\alpha$ : 0.400

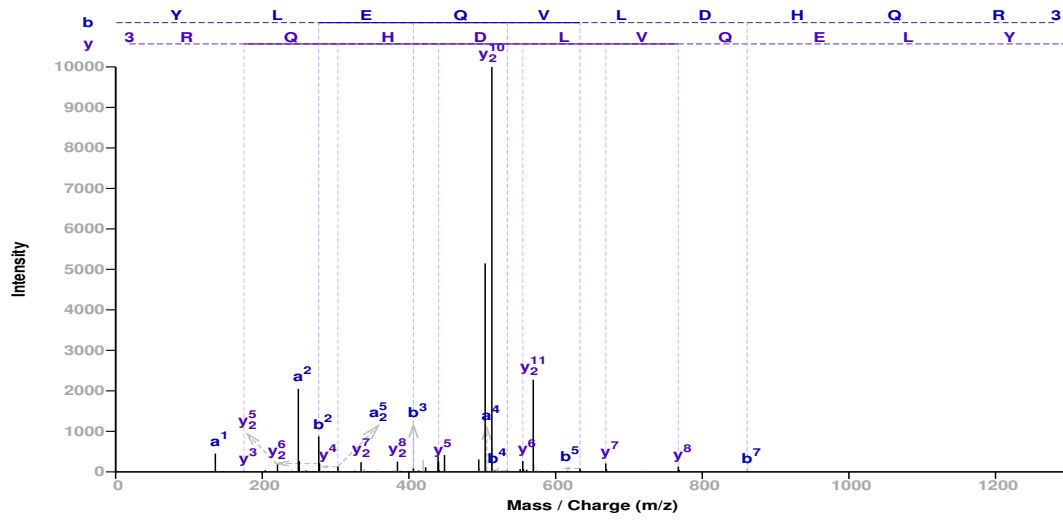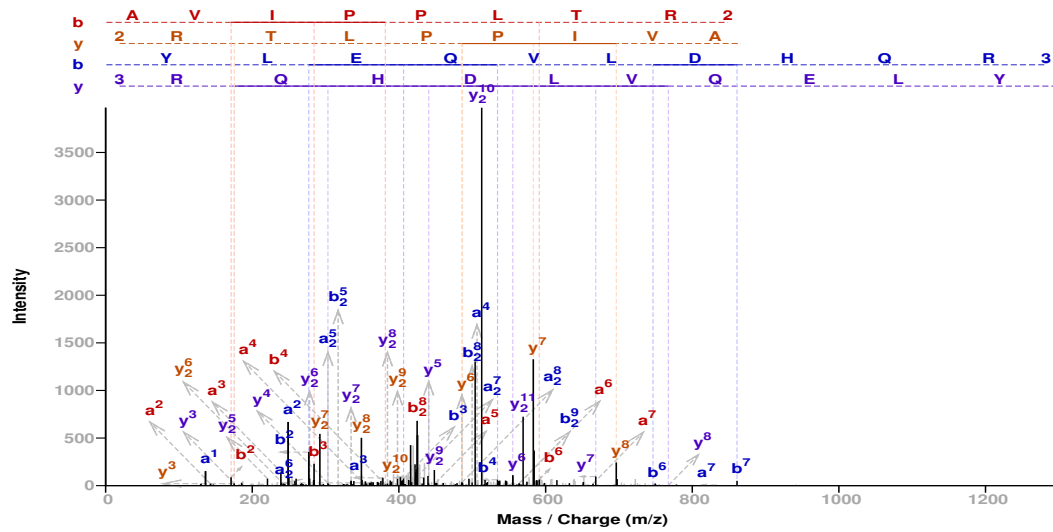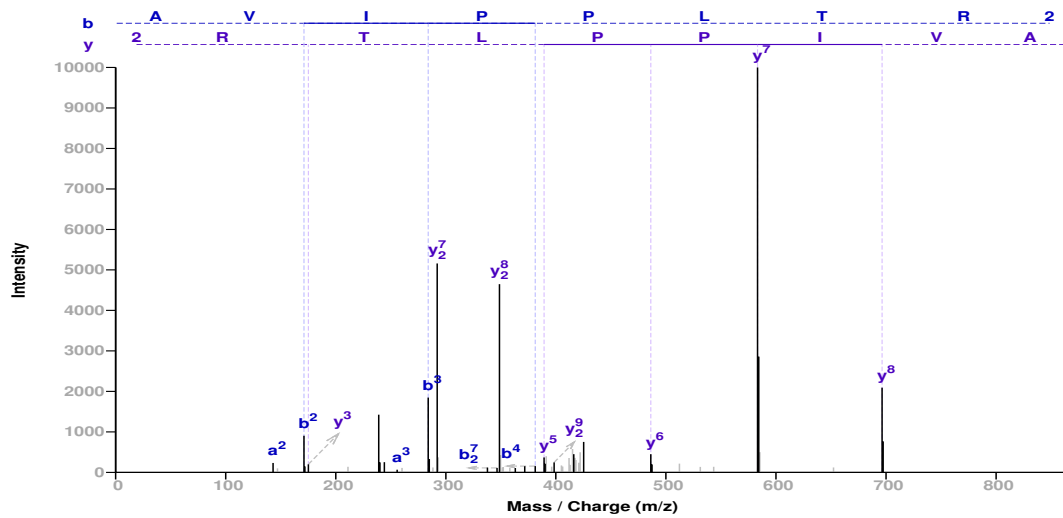

yeast3\_Scan\_Number\_8190 Precursor m/z: 623.338 cosine: 0.771  $\alpha$ : 0.395

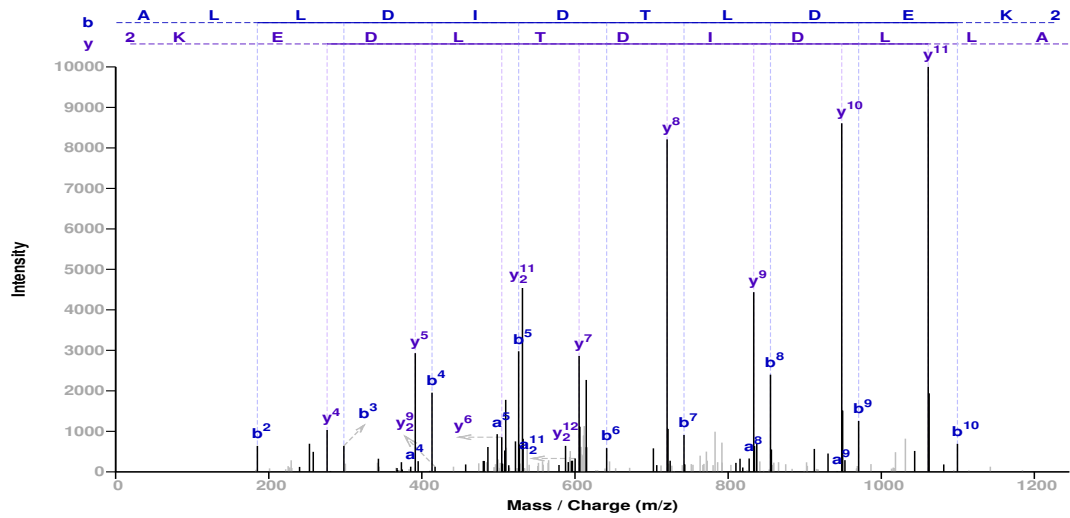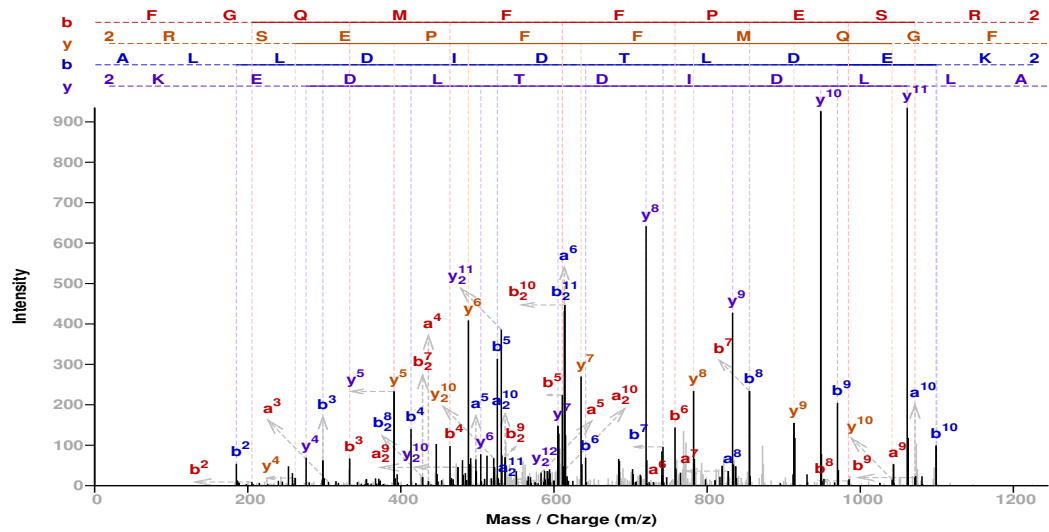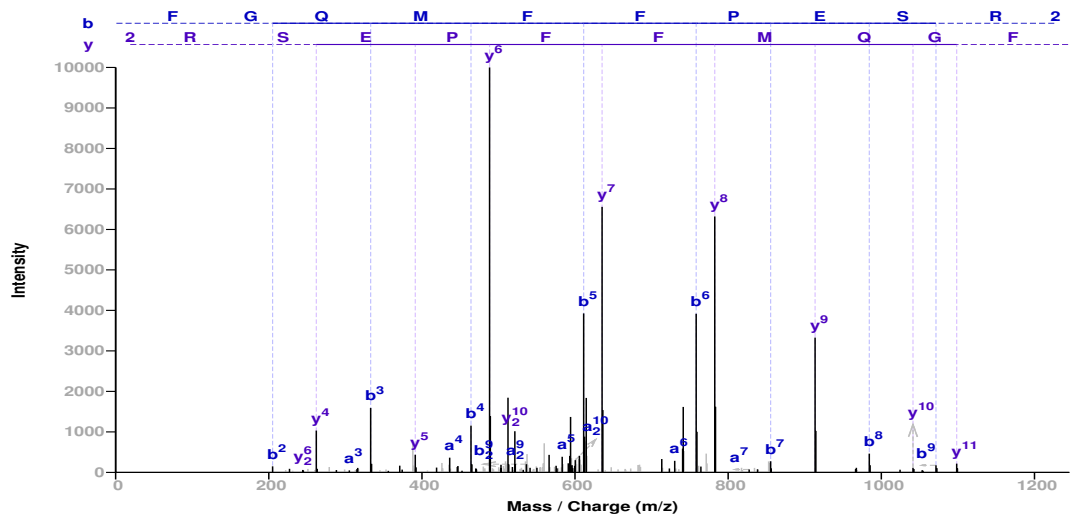





yeast3\_Scan\_Number\_4137 Precursor m/z: 609.833 cosine: 0.788  $\alpha$ : 0.382

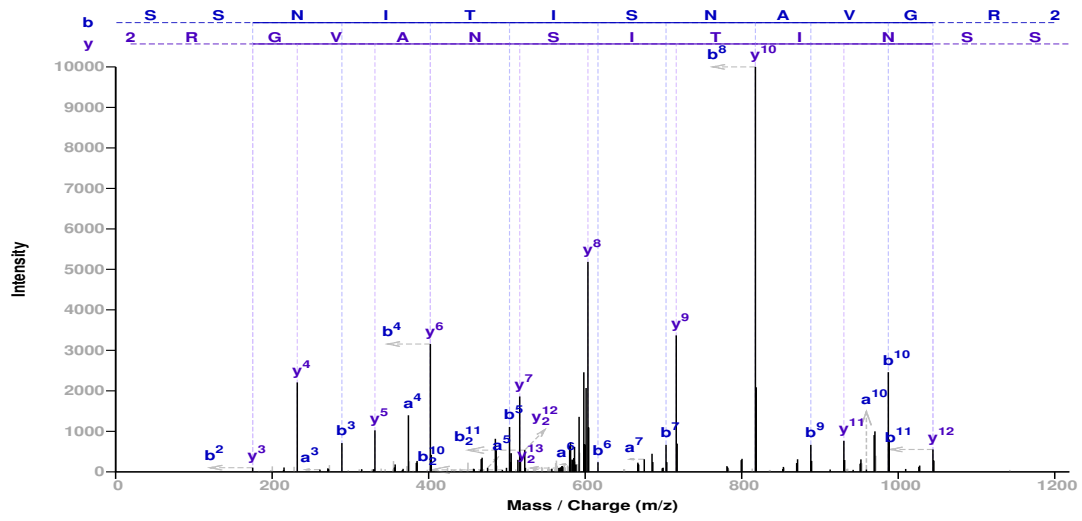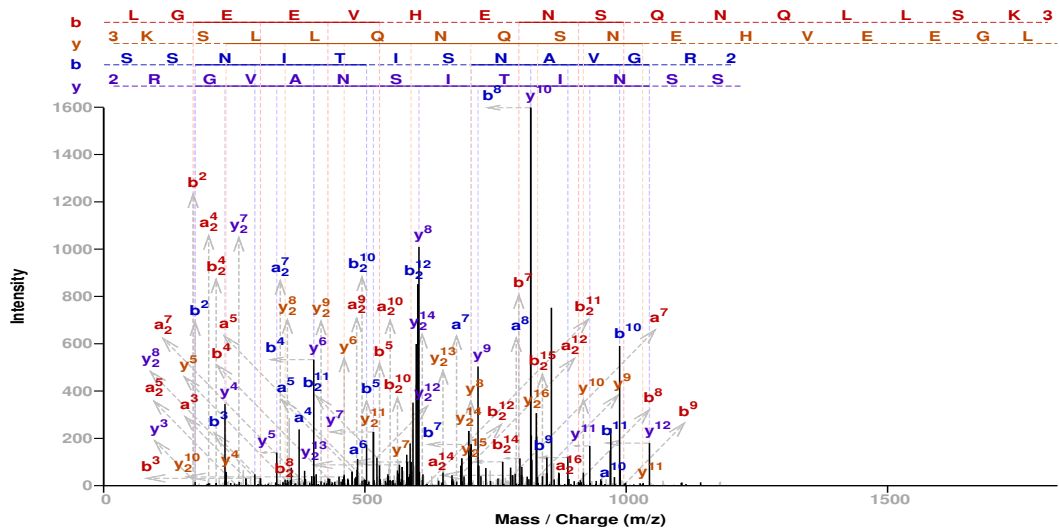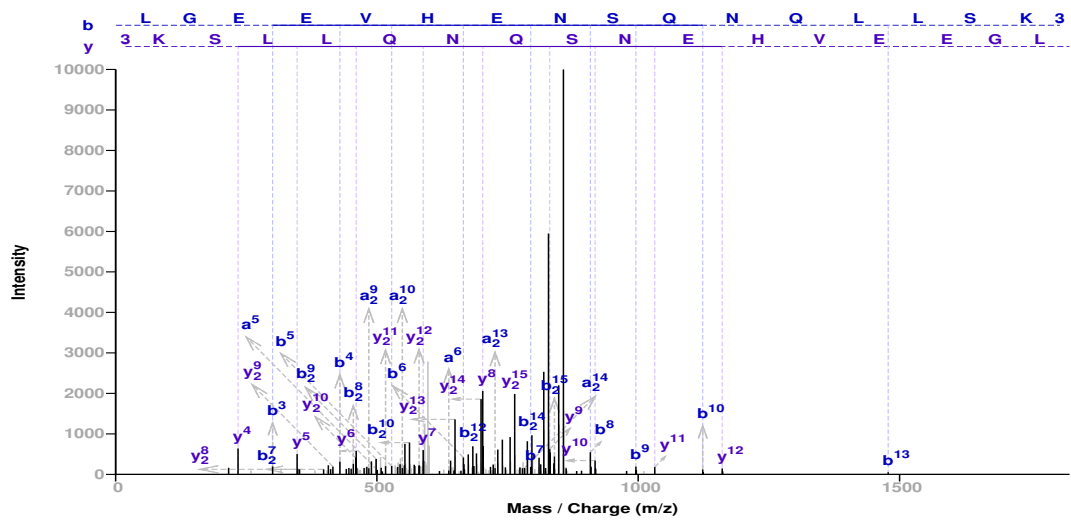

yeast3\_Scan\_Number\_5122 Precursor m/z: 508.300 cosine: 0.828  $\alpha$ : 0.381

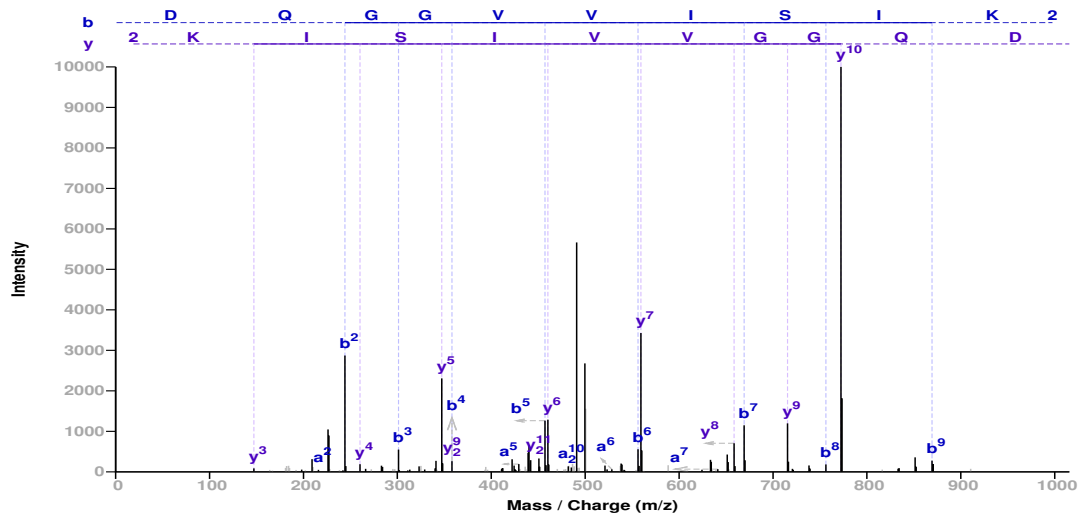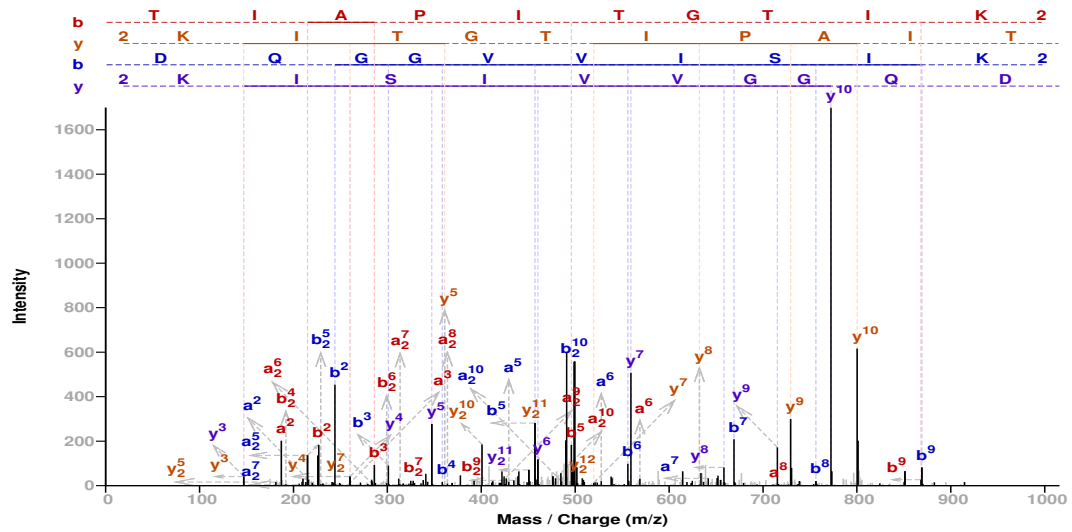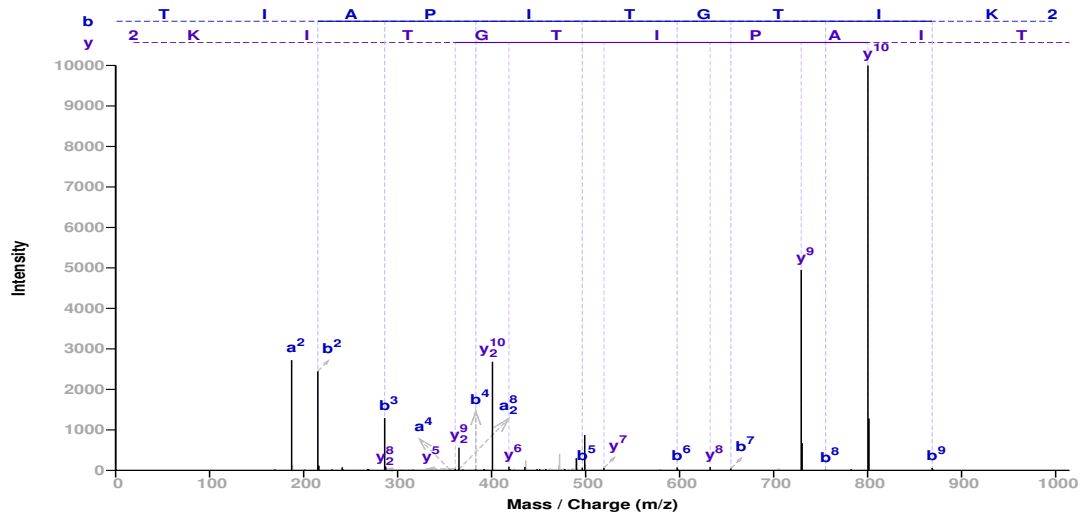

yeast3\_Scan\_Number\_65 Precursor m/z: 332.180 cosine: 0.766  $\alpha$ : 0.380

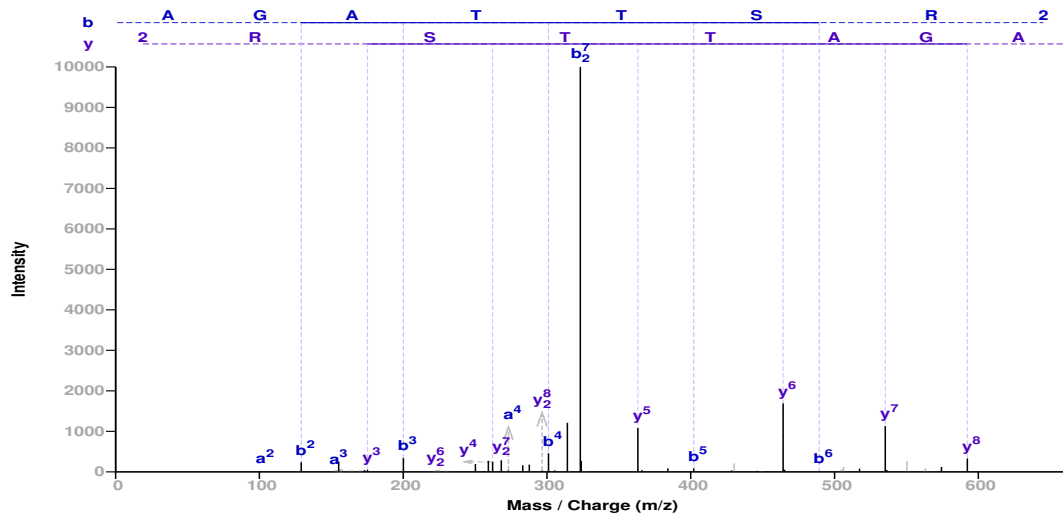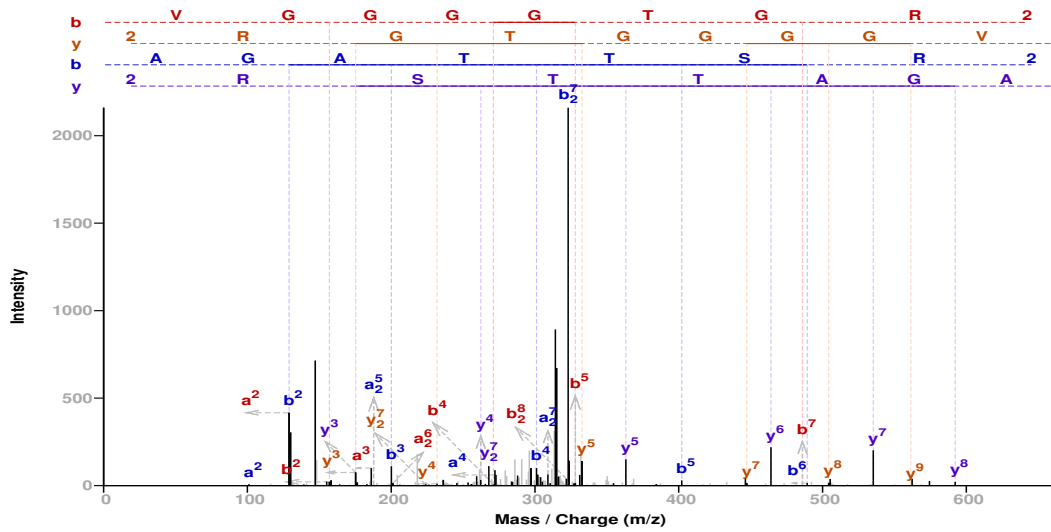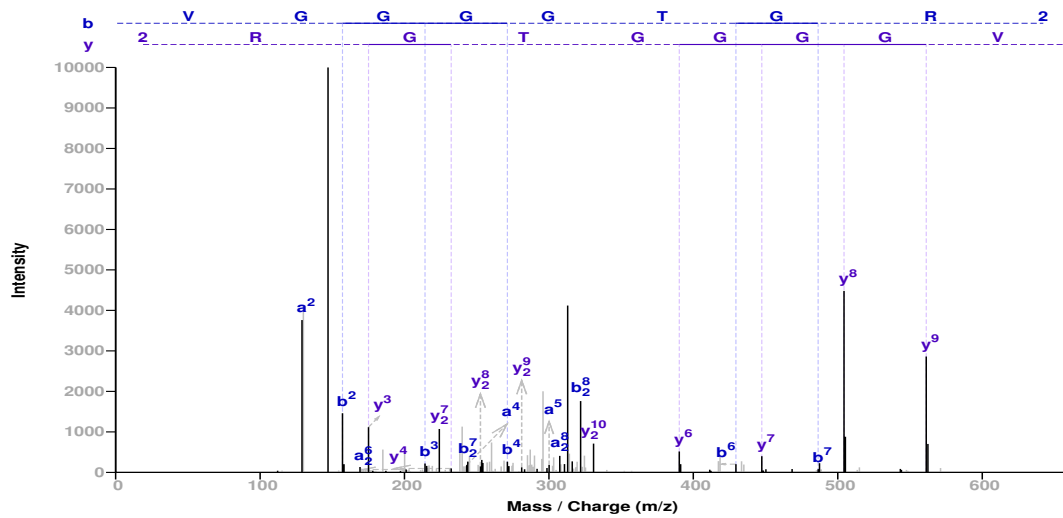

yeast3\_Scan\_Number\_7888 Precursor m/z: 592.358 cosine: 0.733  $\alpha$ : 0.379

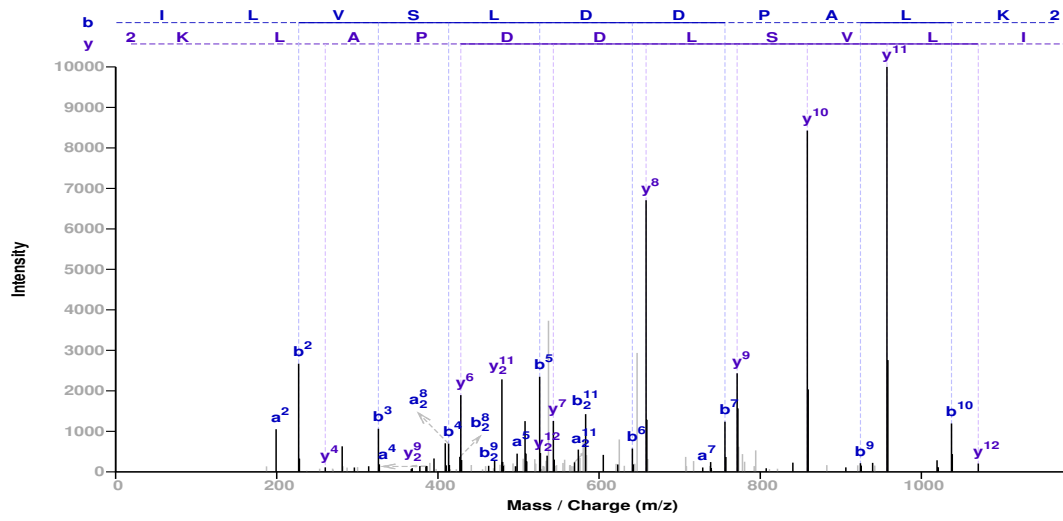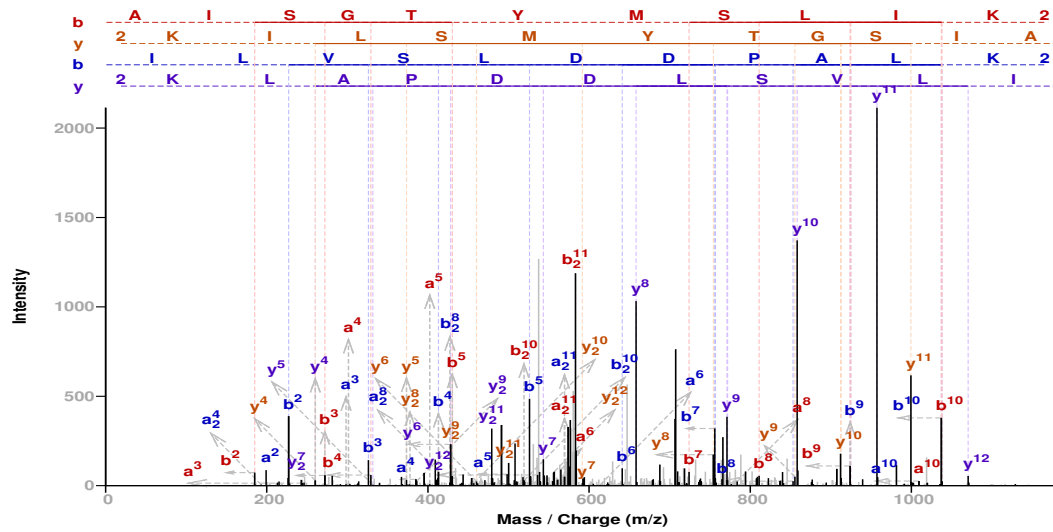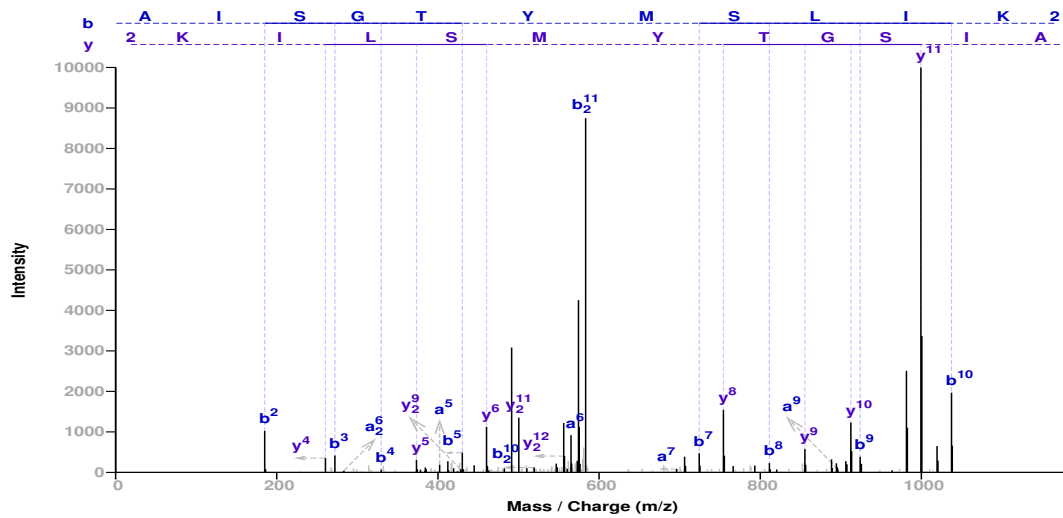

yeast3\_Scan\_Number\_4990 Precursor m/z: 715.870 cosine: 0.781  $\alpha$ : 0.378

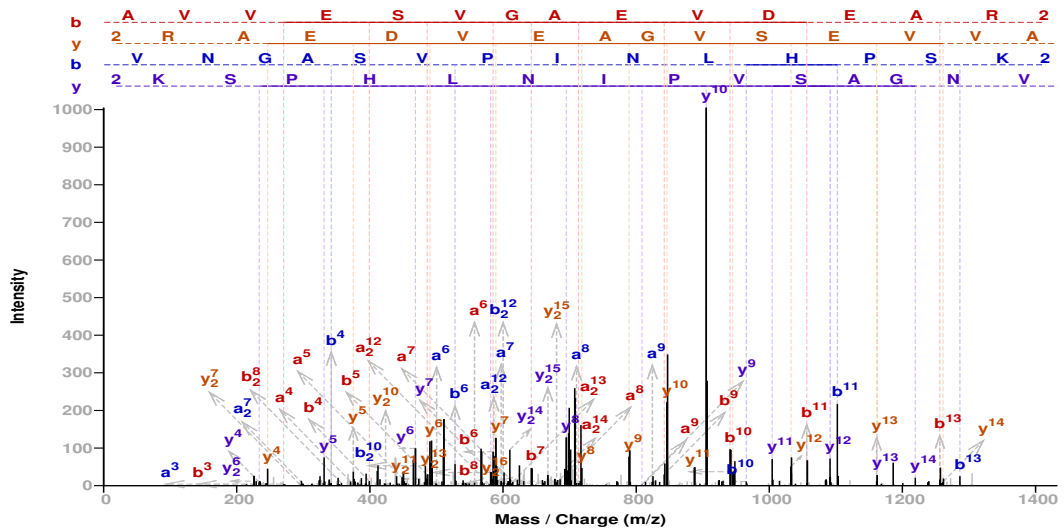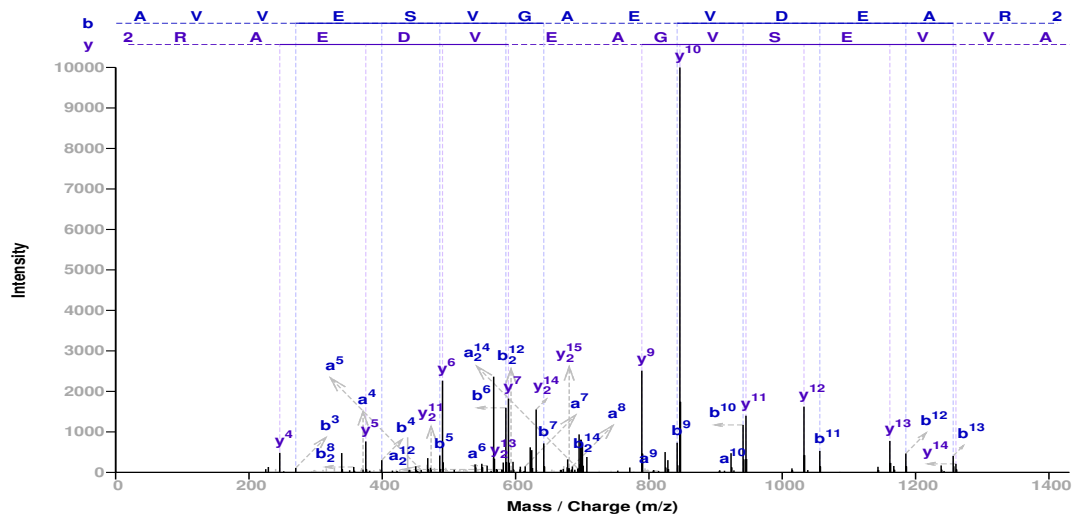

yeast3\_Scan\_Number\_1793 Precursor m/z: 405.204 cosine: 0.764  $\alpha$ : 0.358

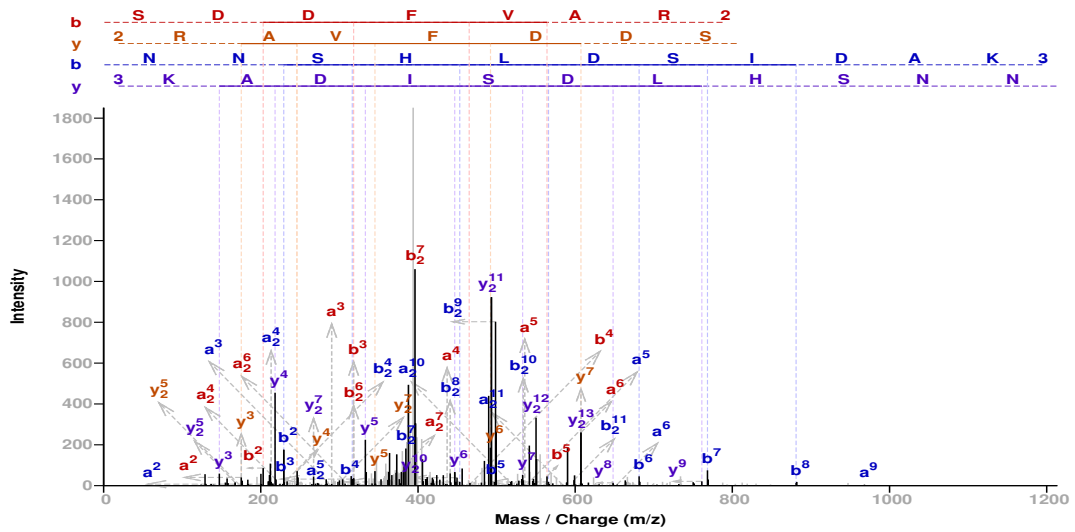

yeast3\_Scan\_Number\_4152 Precursor m/z: 472.755 cosine: 0.777  $\alpha$ : 0.343

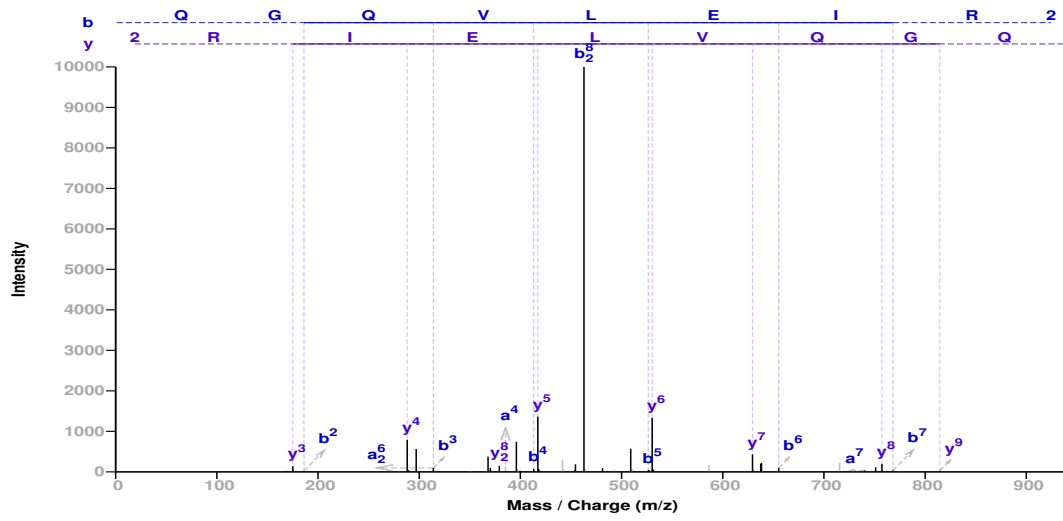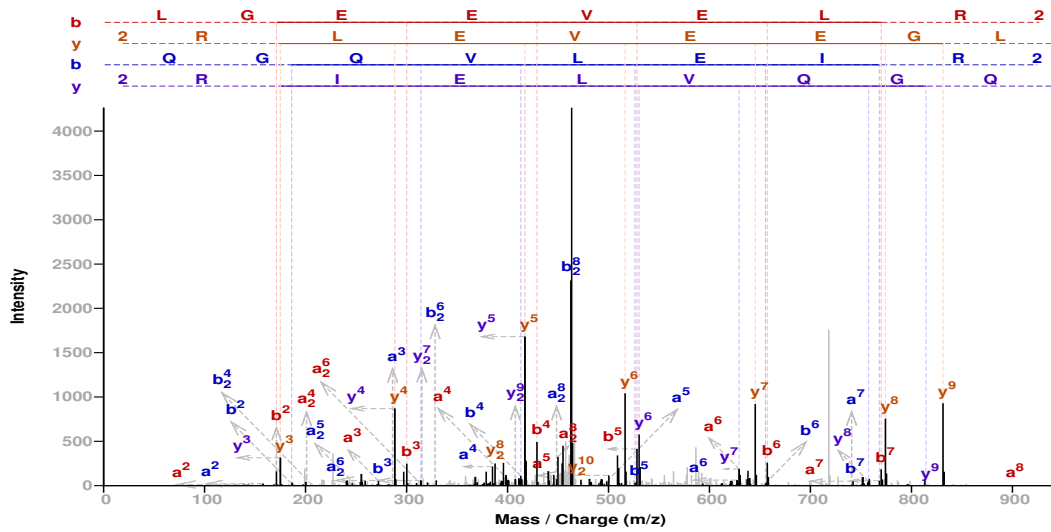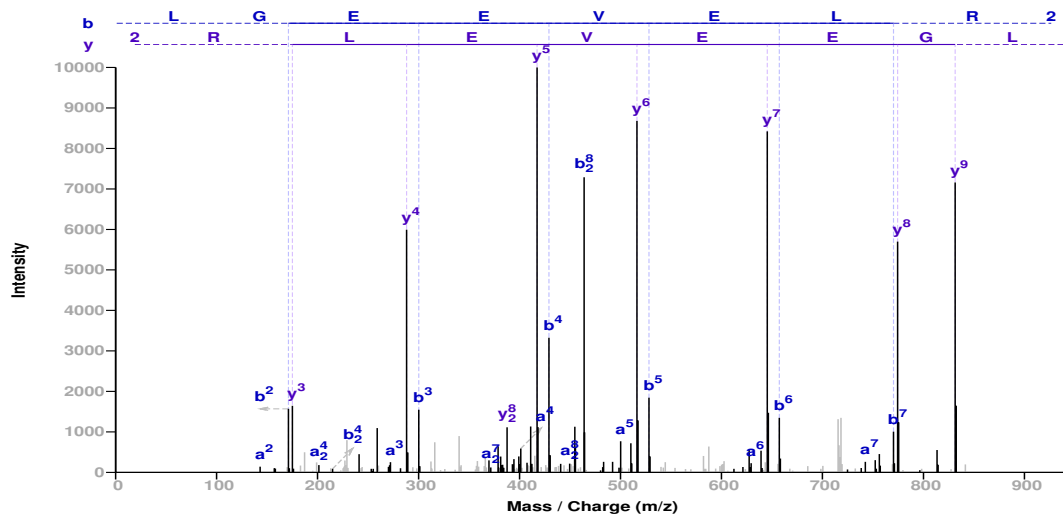

yeast3\_Scan\_Number\_3790 Precursor m/z: 633.335 cosine: 0.798  $\alpha$ : 0.342

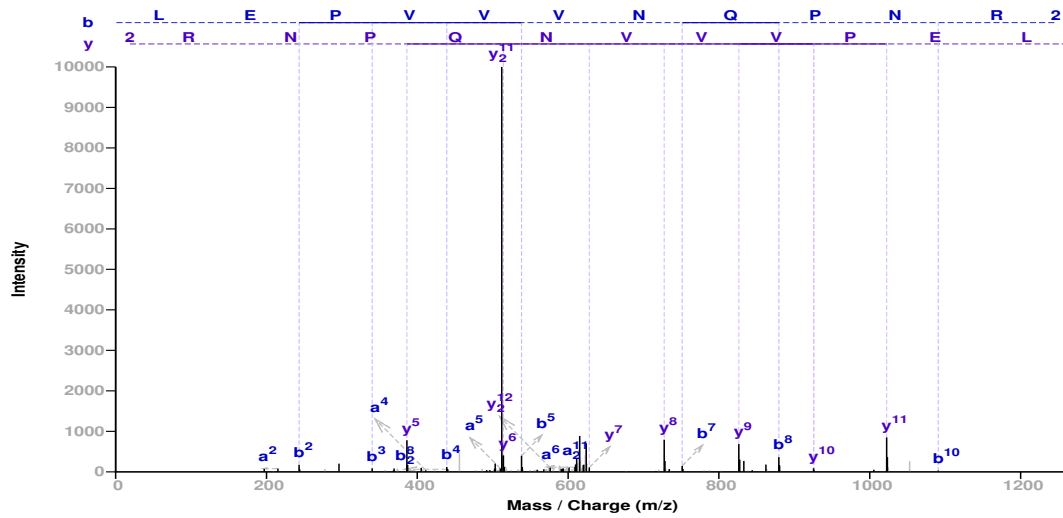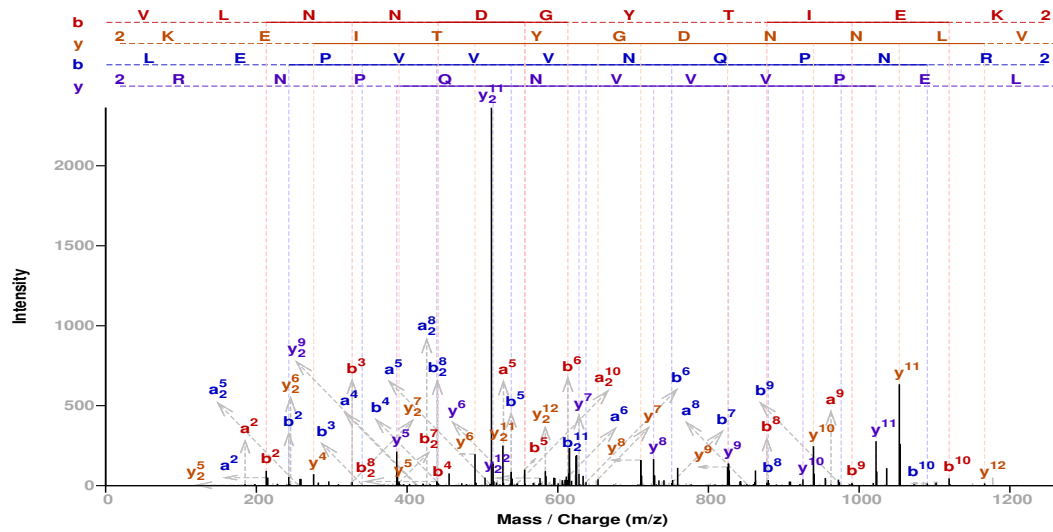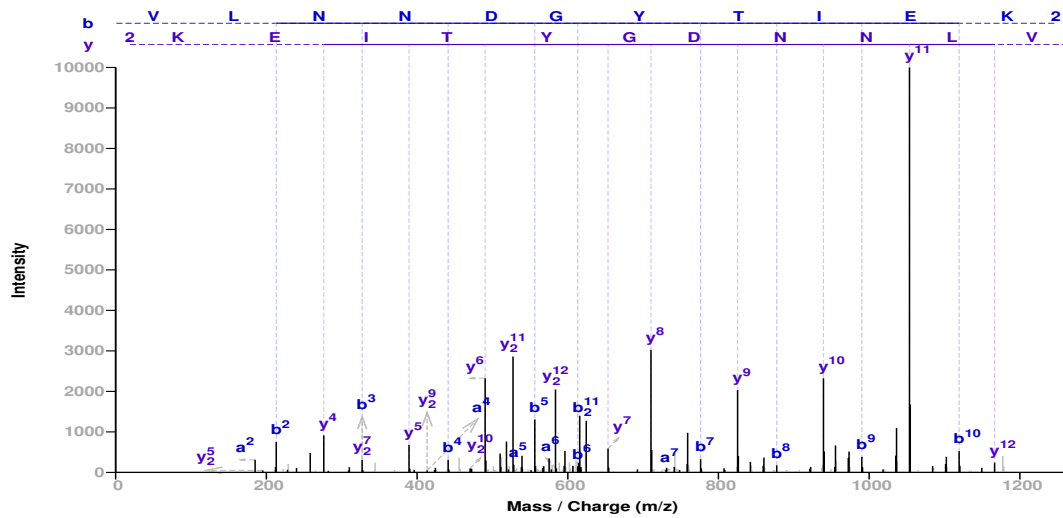



yeast3\_Scan\_Number\_3817 Precursor m/z: 380.239 cosine: 0.773  $\alpha$ : 0.339

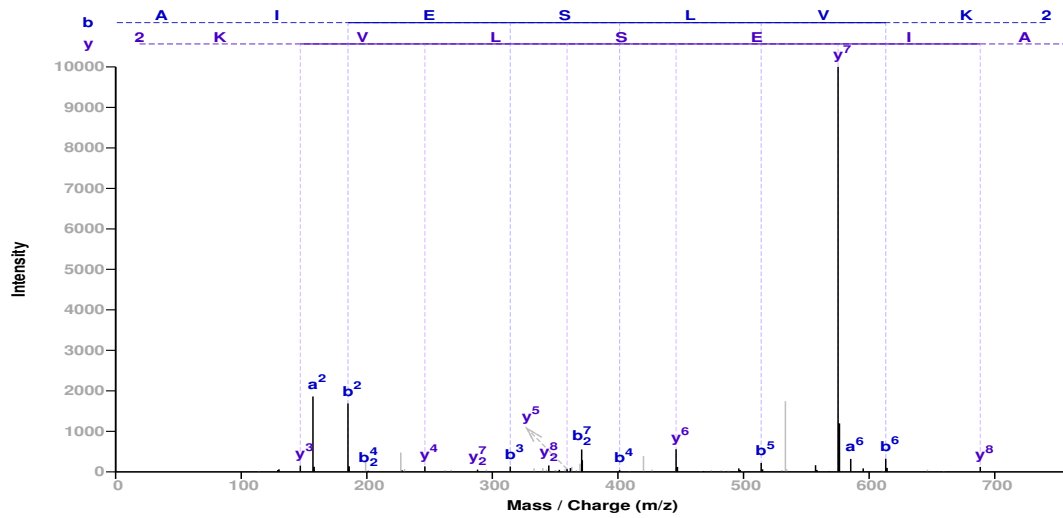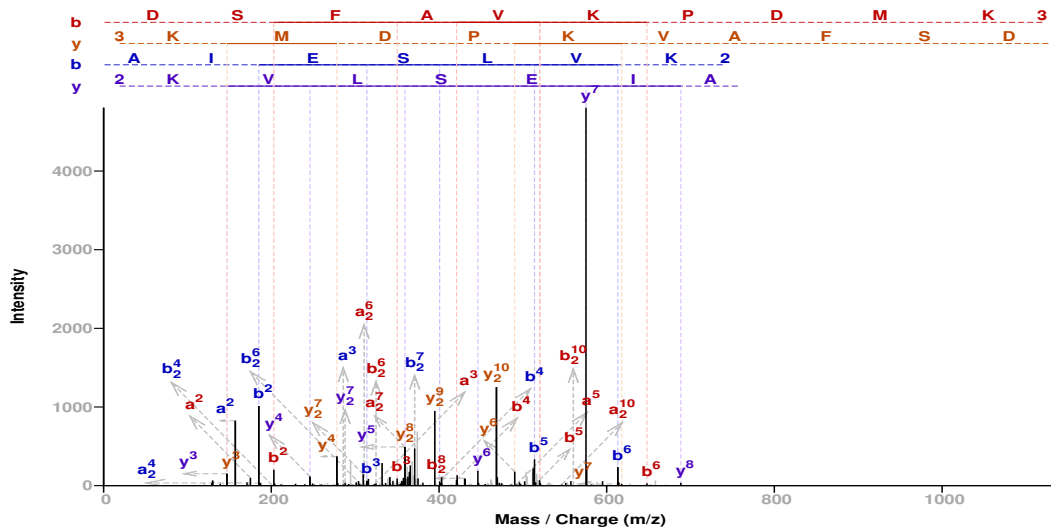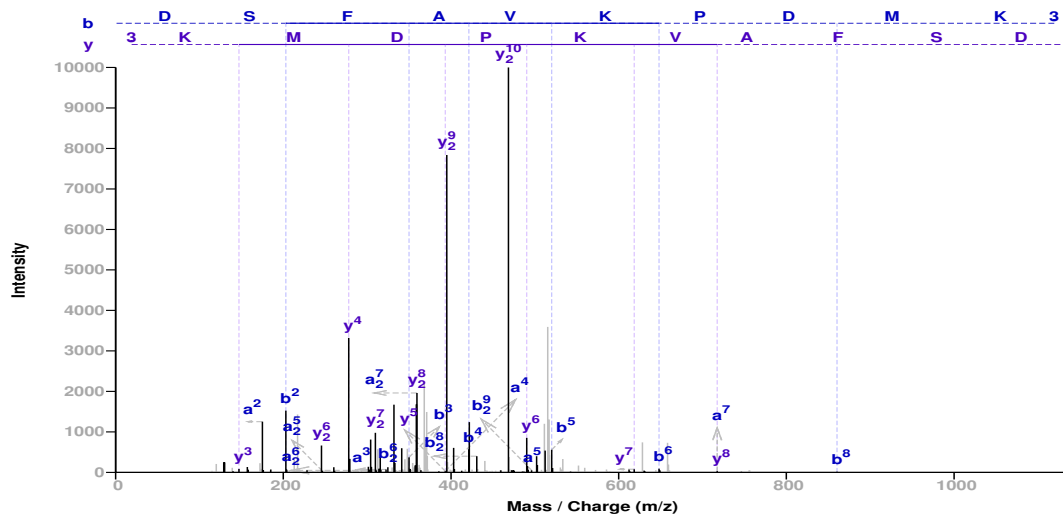

yeast3\_Scan\_Number\_6434 Precursor m/z: 851.453 cosine: 0.753  $\alpha$ : 0.334

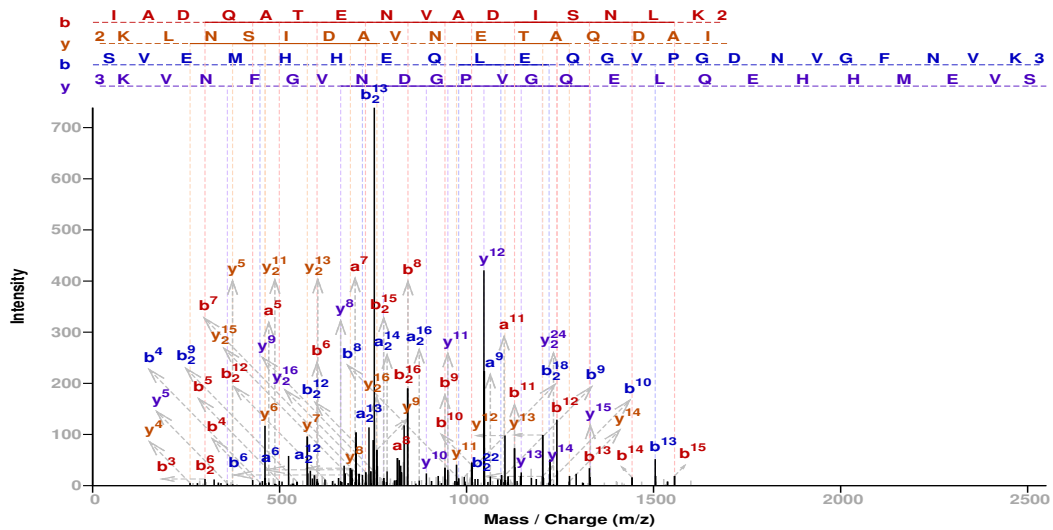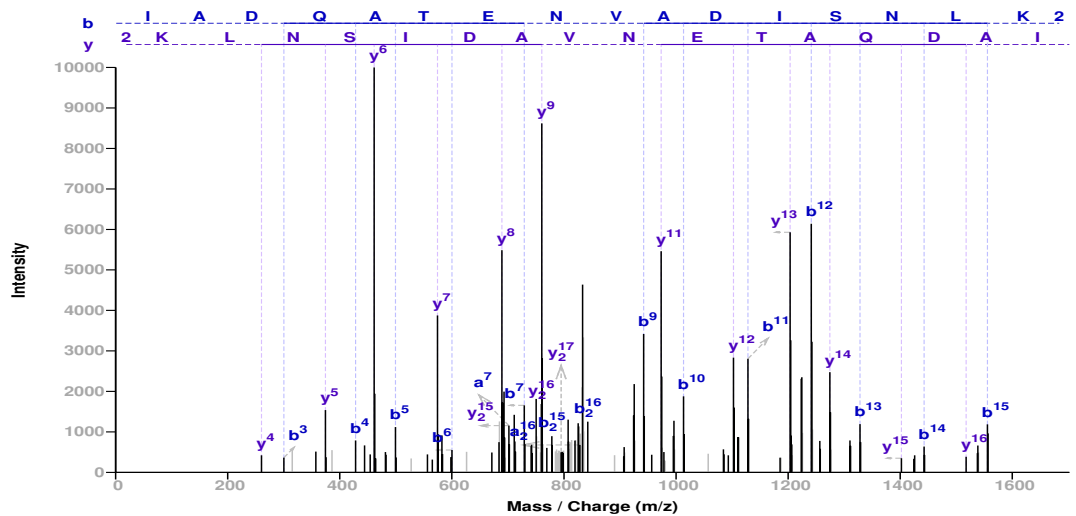

yeast3\_Scan\_Number\_8445 Precursor m/z: 481.794 cosine: 0.829  $\alpha$ : 0.328

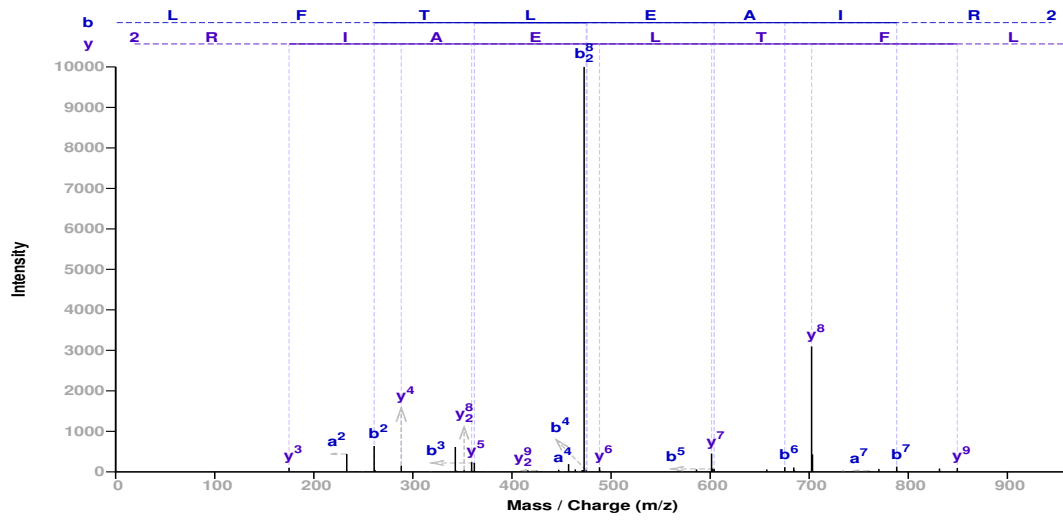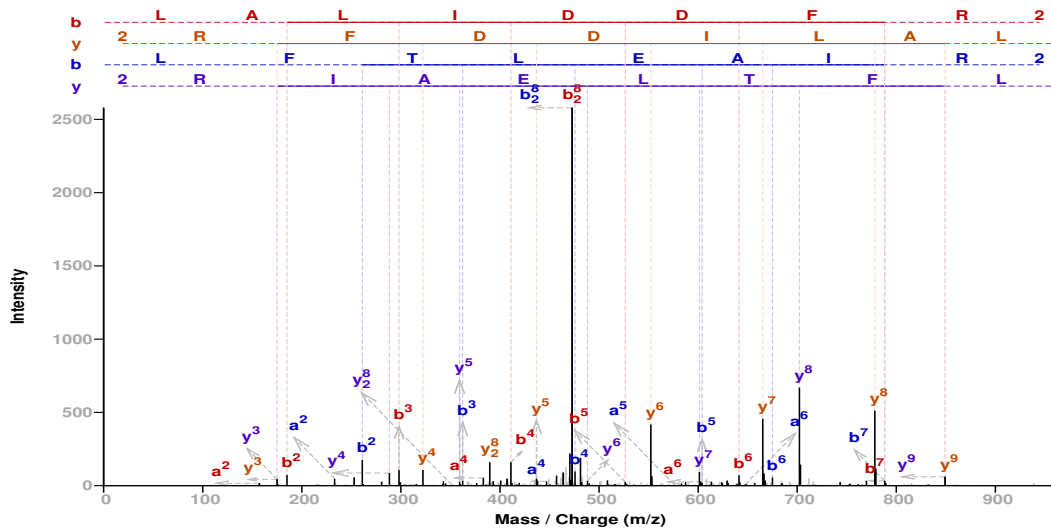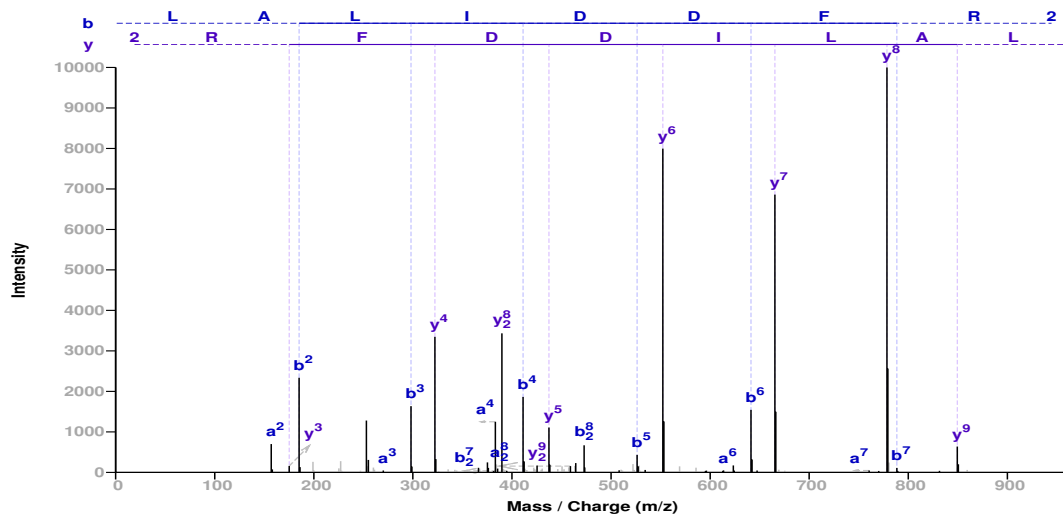

yeast3\_Scan\_Number\_5681 Precursor m/z: 328.743 cosine: 0.807  $\alpha$ : 0.326

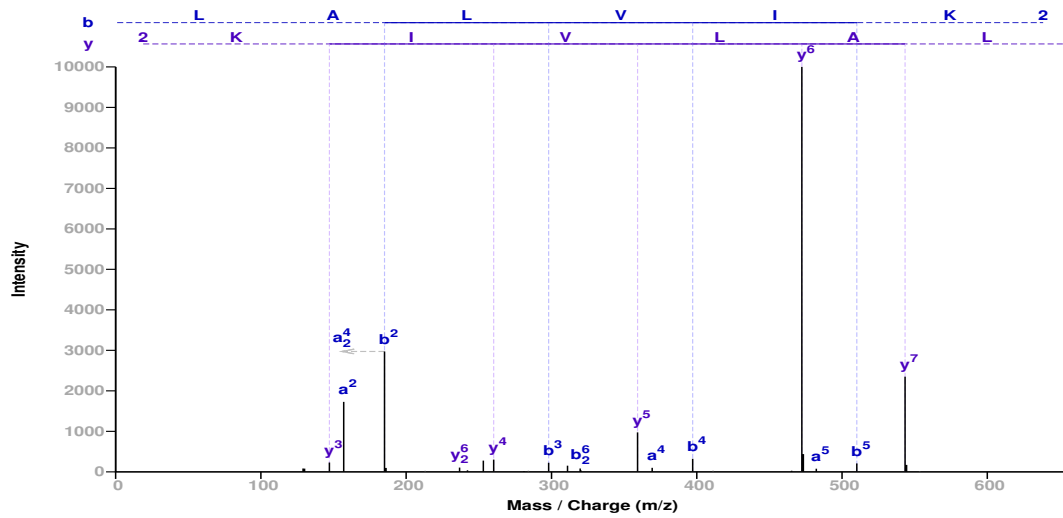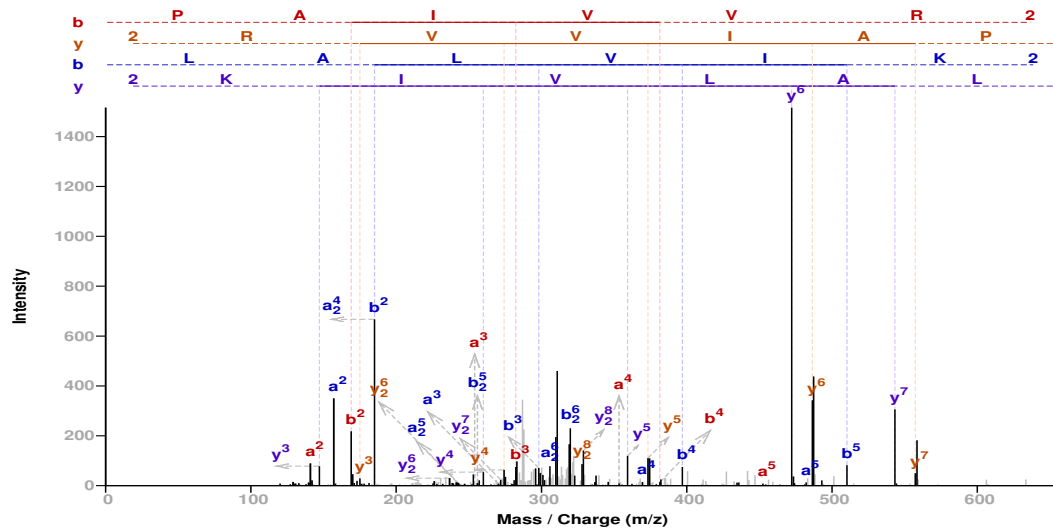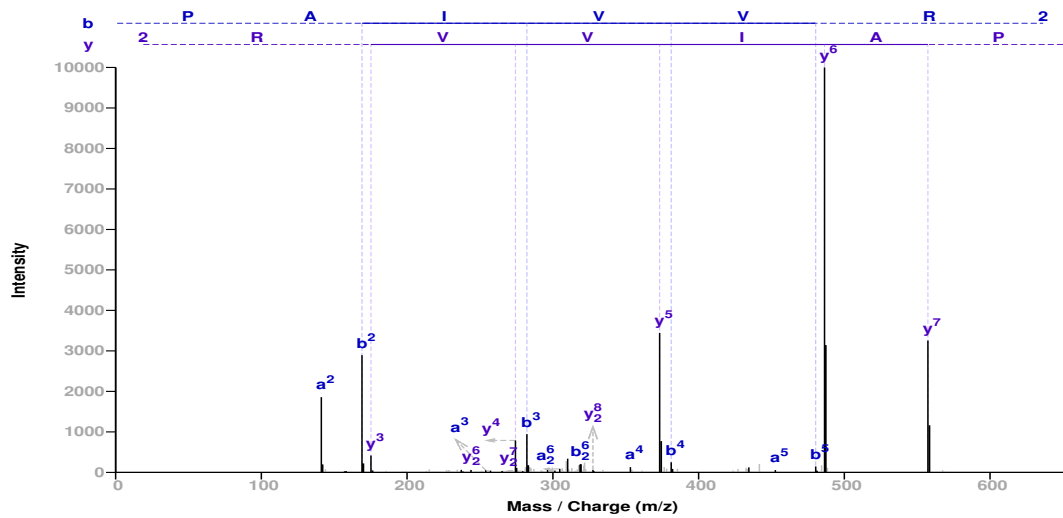

yeast3\_Scan\_Number\_1468 Precursor m/z: 458.752 cosine: 0.787  $\alpha$ : 0.317

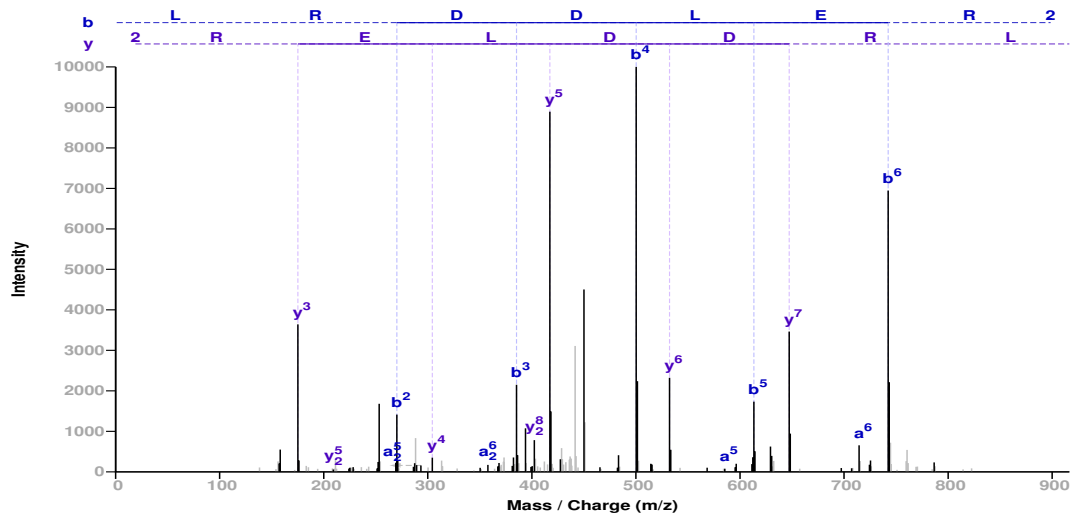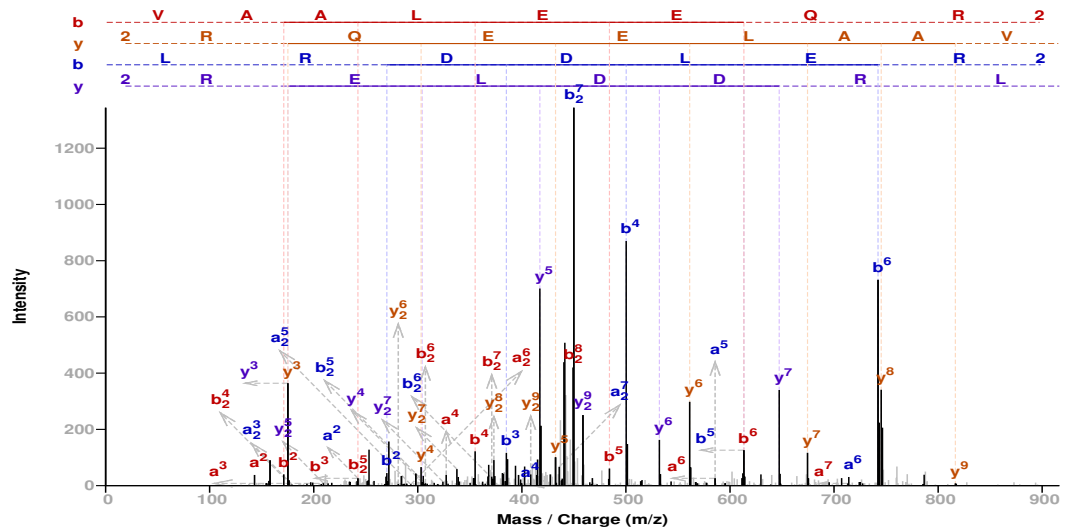

yeast3\_Scan\_Number\_949 Precursor m/z: 391.237 cosine: 0.857  $\alpha$ : 0.314

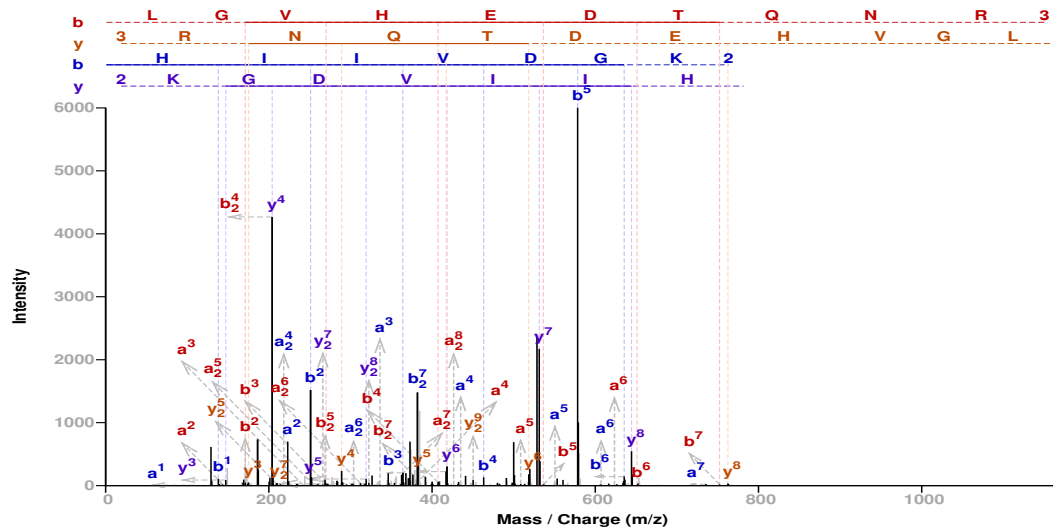

yeast3\_Scan\_Number\_6321 Precursor m/z: 631.336 cosine: 0.759  $\alpha$ : 0.313

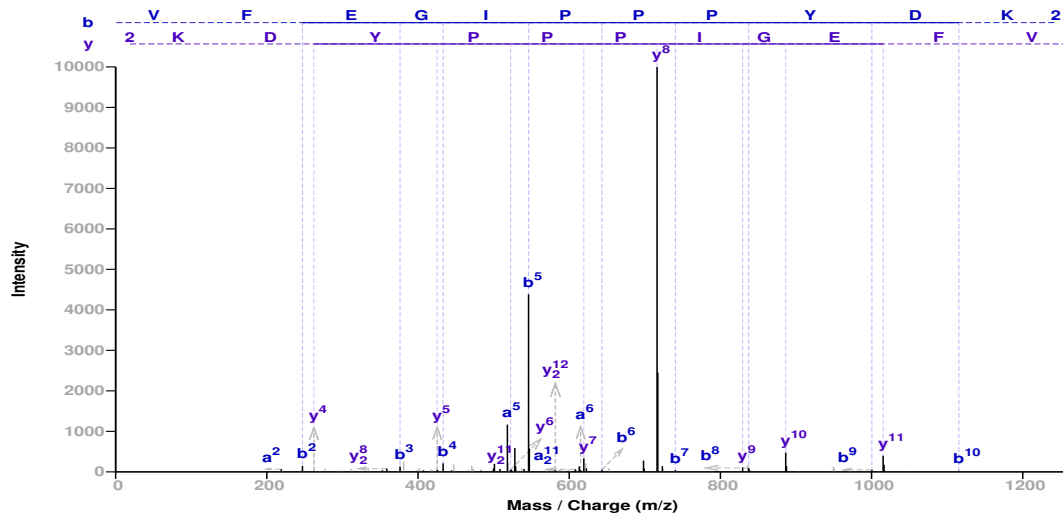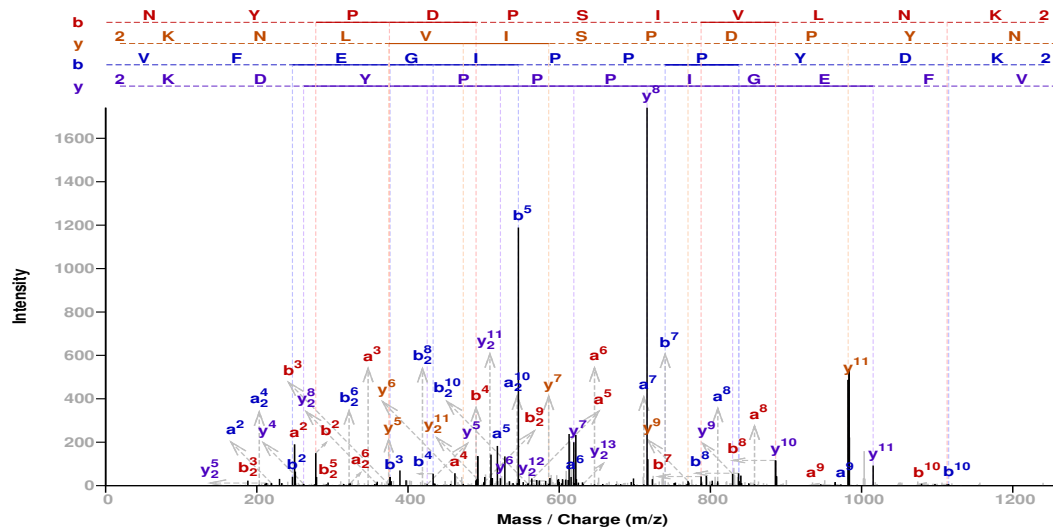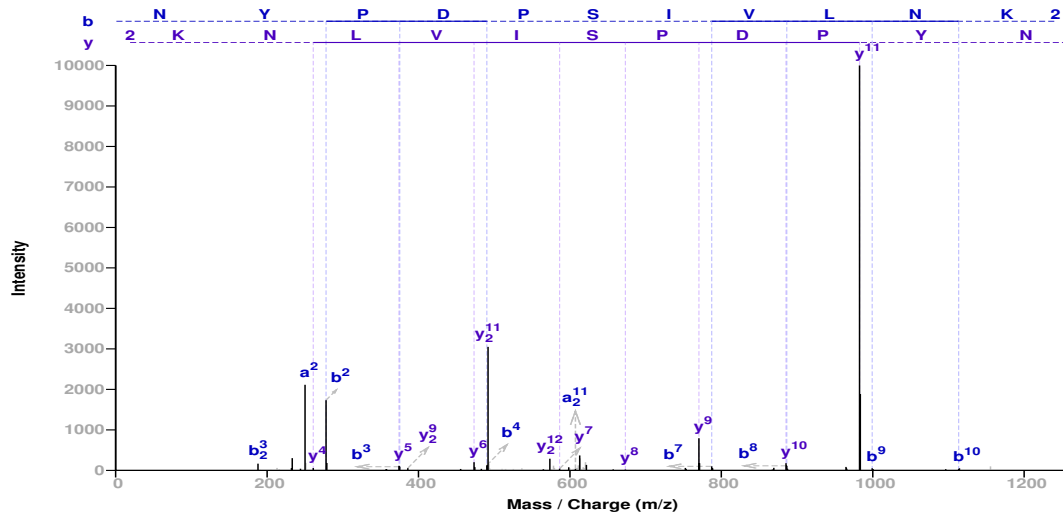

yeast3\_Scan\_Number\_3526 Precursor m/z: 508.288 cosine: 0.771  $\alpha$ : 0.311

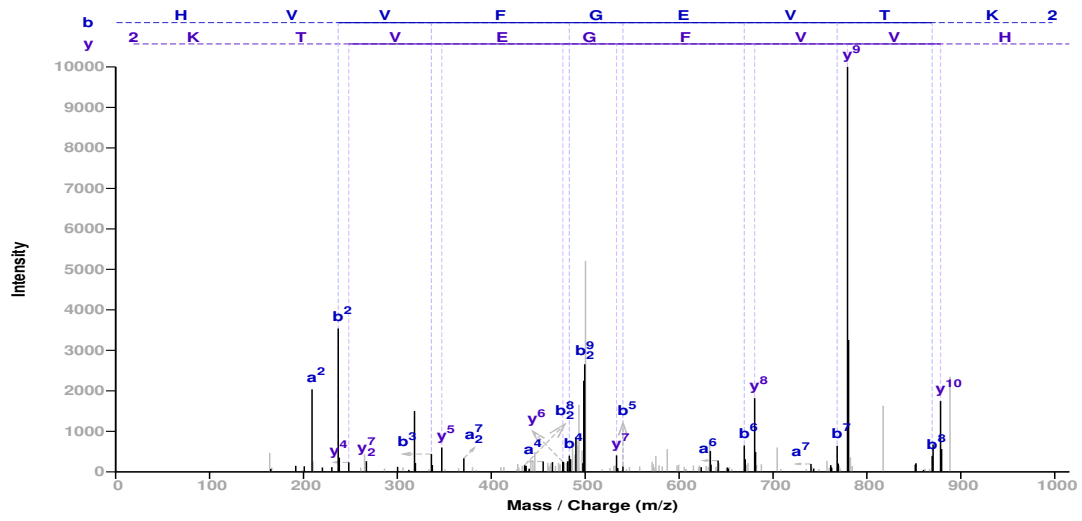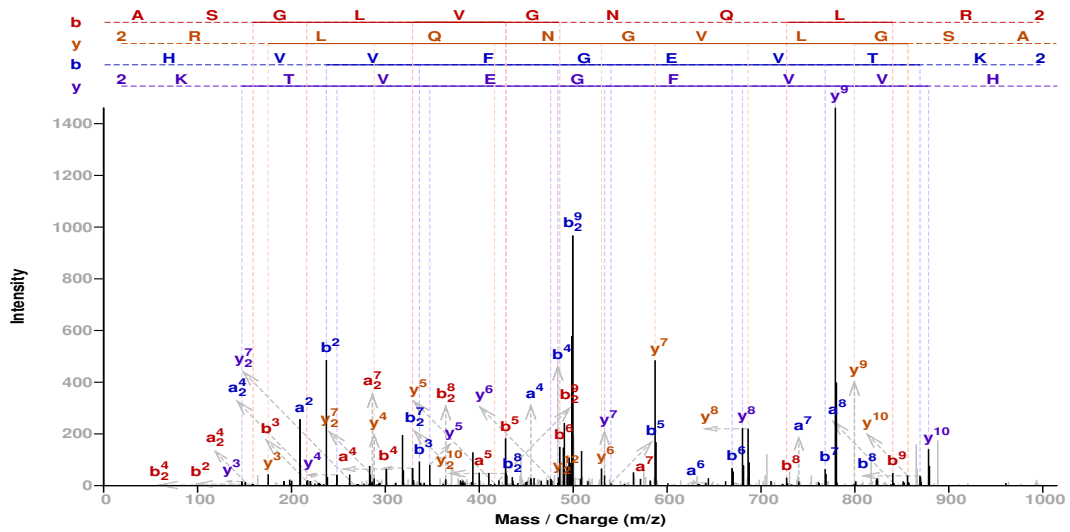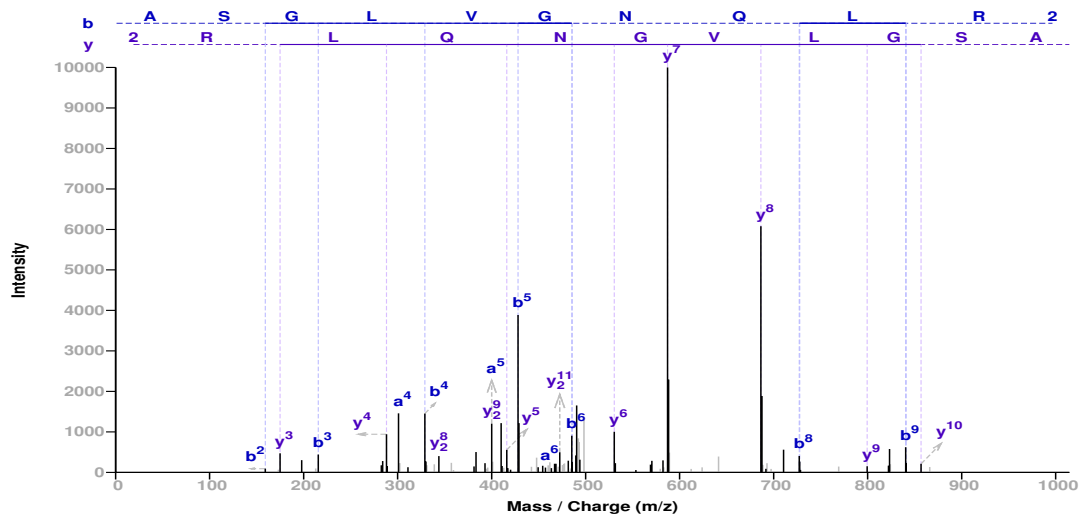



yeast3\_Scan\_Number\_1217 Precursor m/z: 530.284 cosine: 0.781  $\alpha$ : 0.309

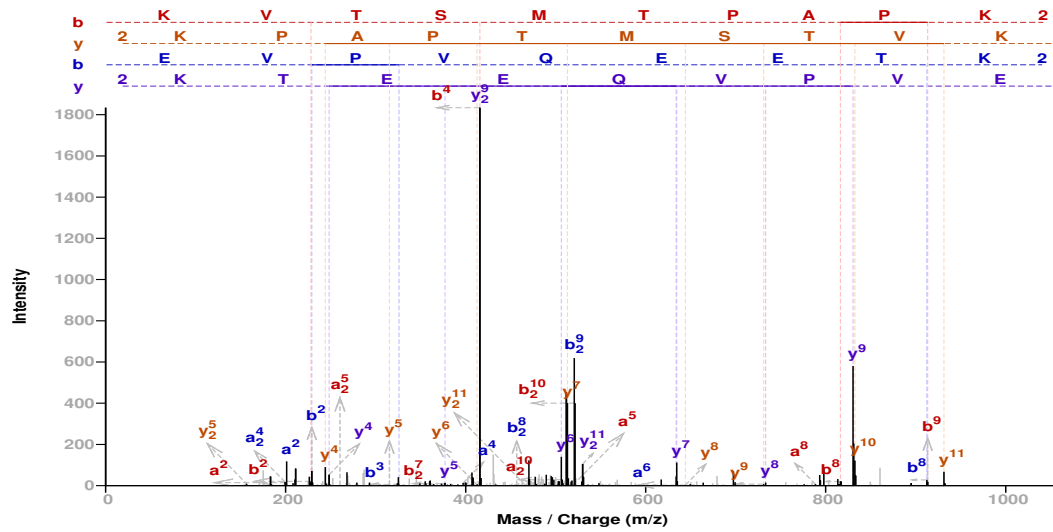

yeast3\_Scan\_Number\_7870 Precursor m/z: 819.755 cosine: 0.776  $\alpha$ : 0.303

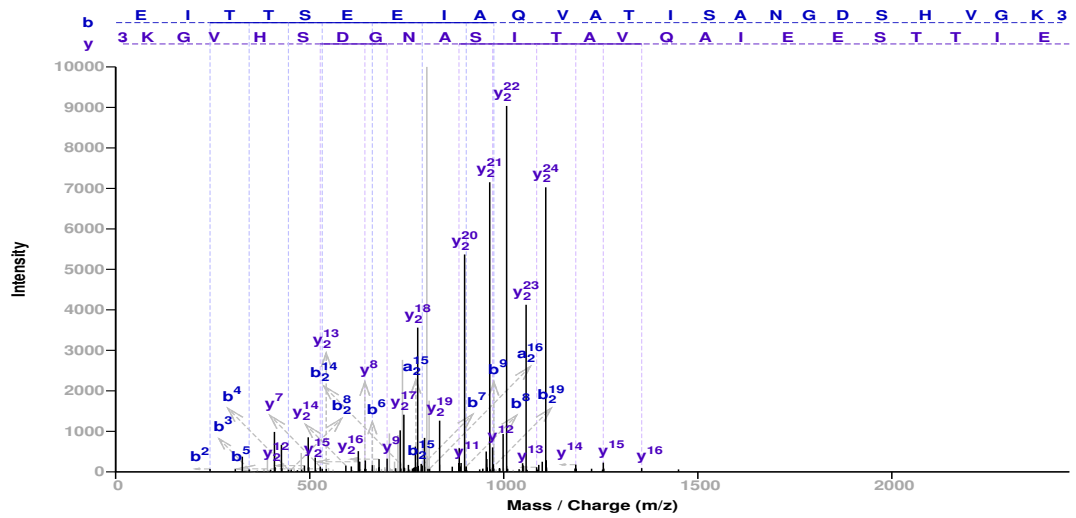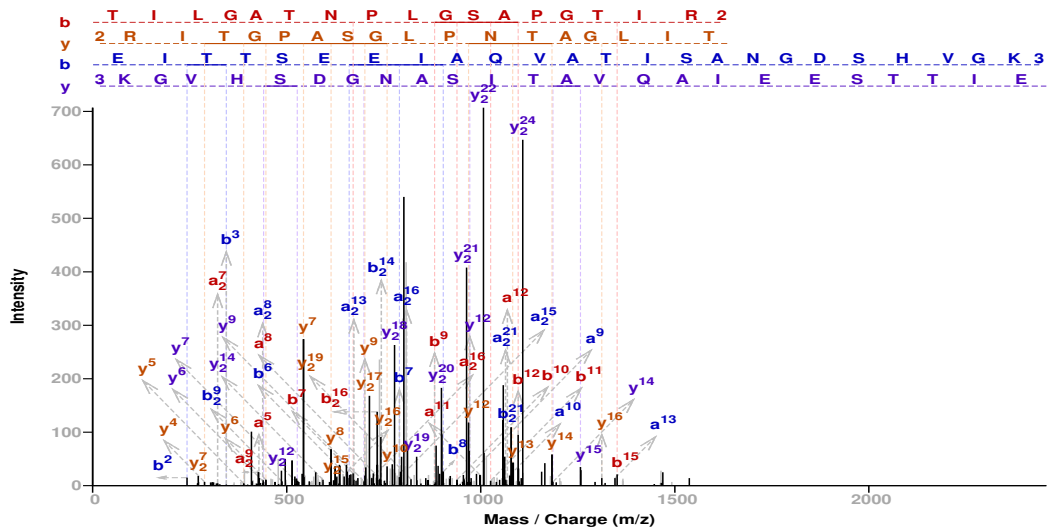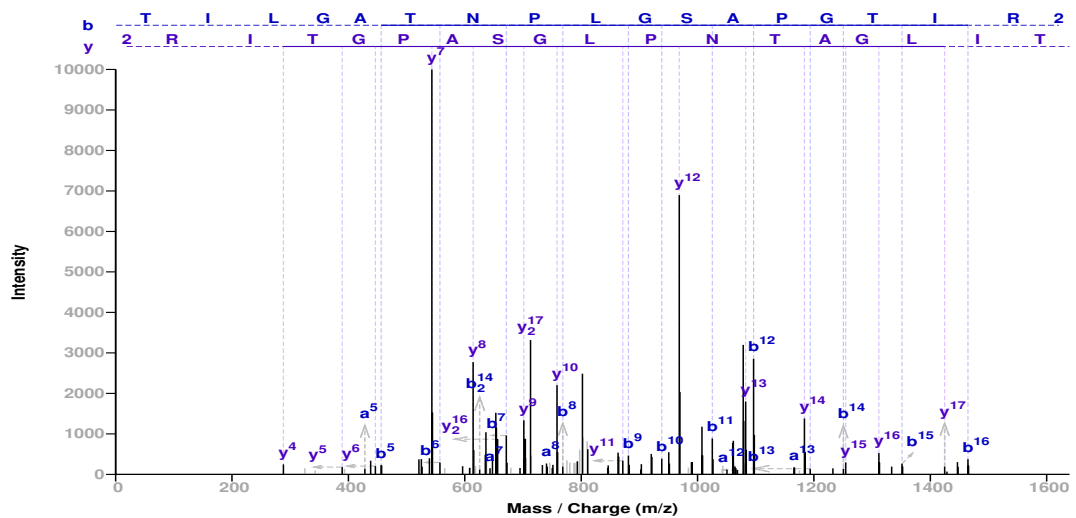

yeast3.Scan\_Number.1246 Precursor m/z: 452.219 cosine: 0.742  $\alpha$ : 0.296

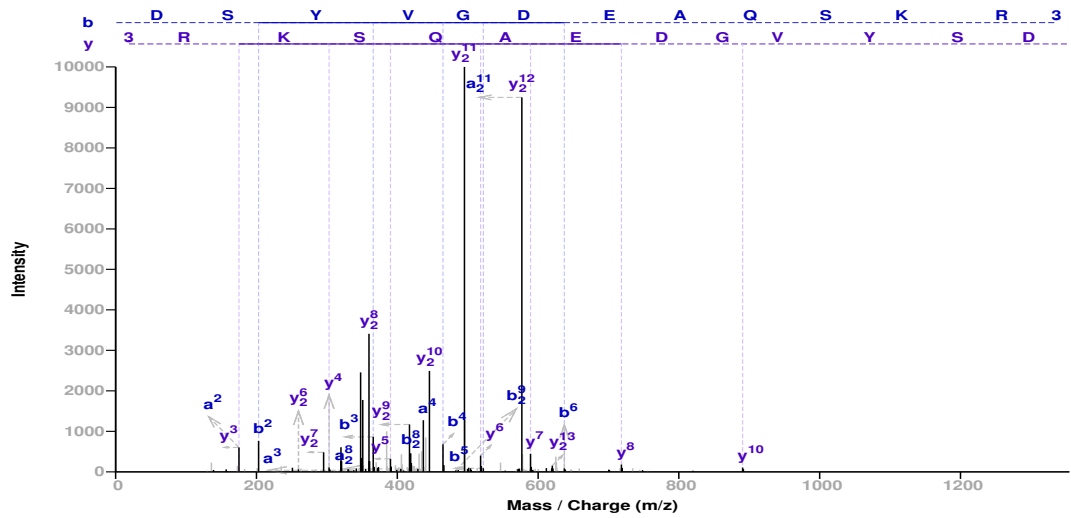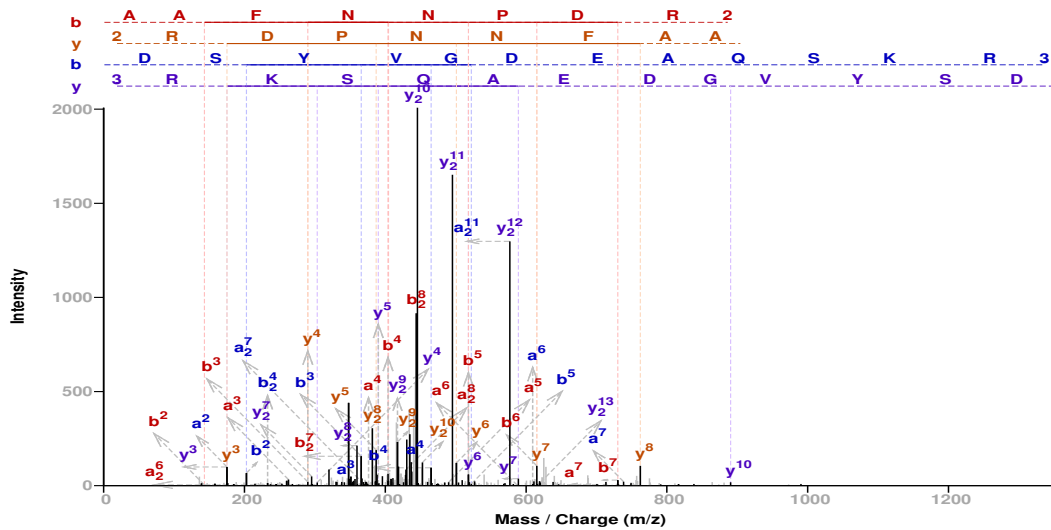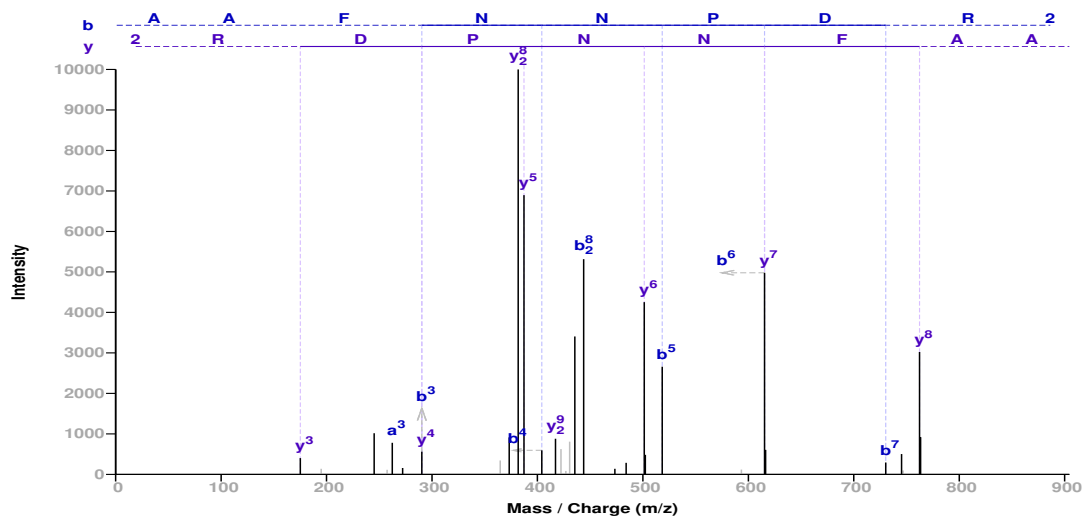

yeast3\_Scan\_Number\_1982 Precursor m/z: 412.565 cosine: 0.831  $\alpha$ : 0.289

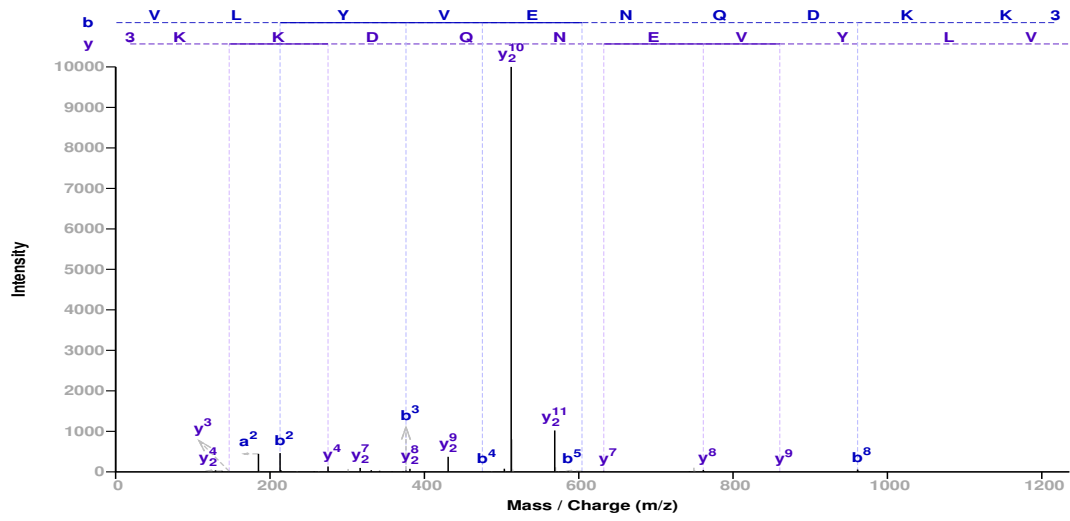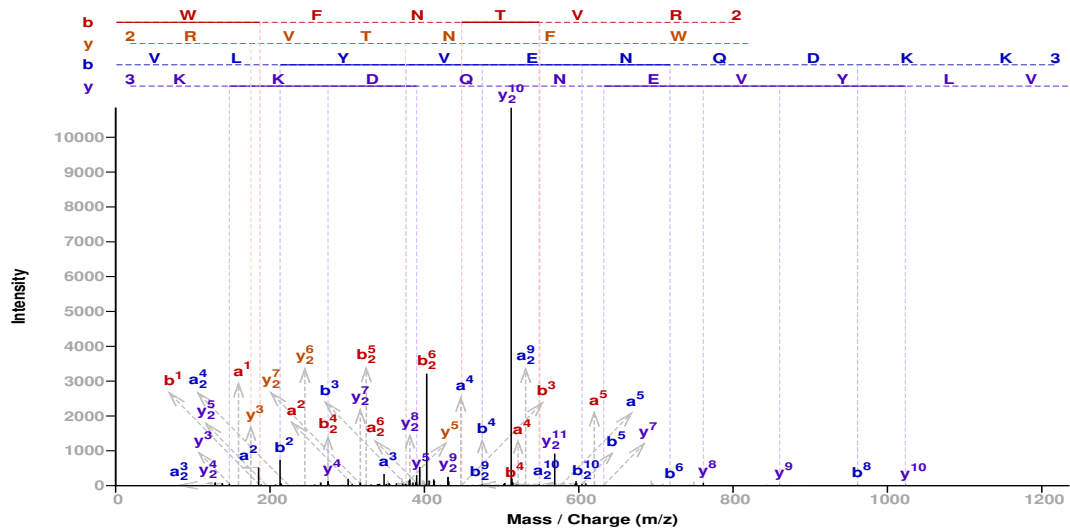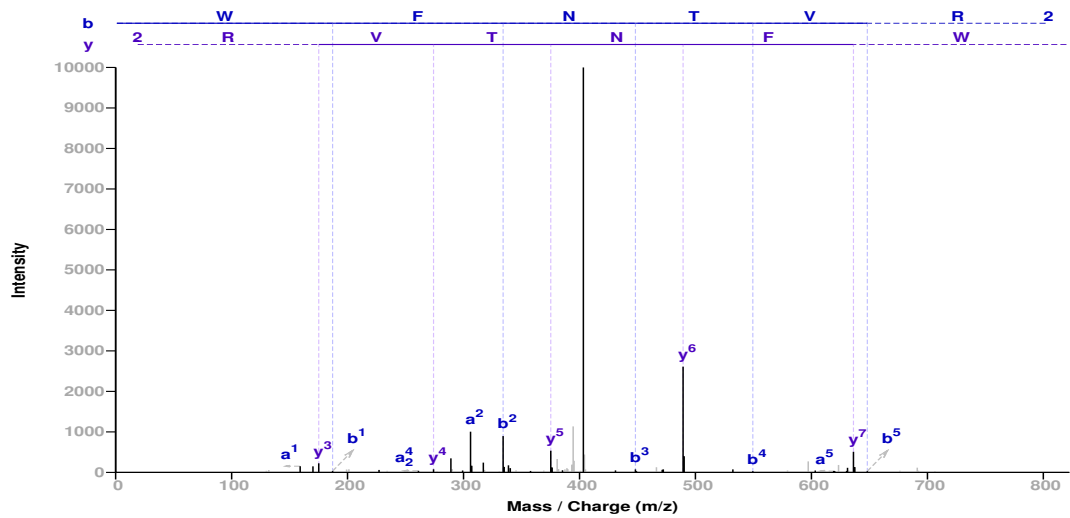



yeast3\_Scan\_Number\_508 Precursor m/z: 344.702 cosine: 0.774  $\alpha$ : 0.280

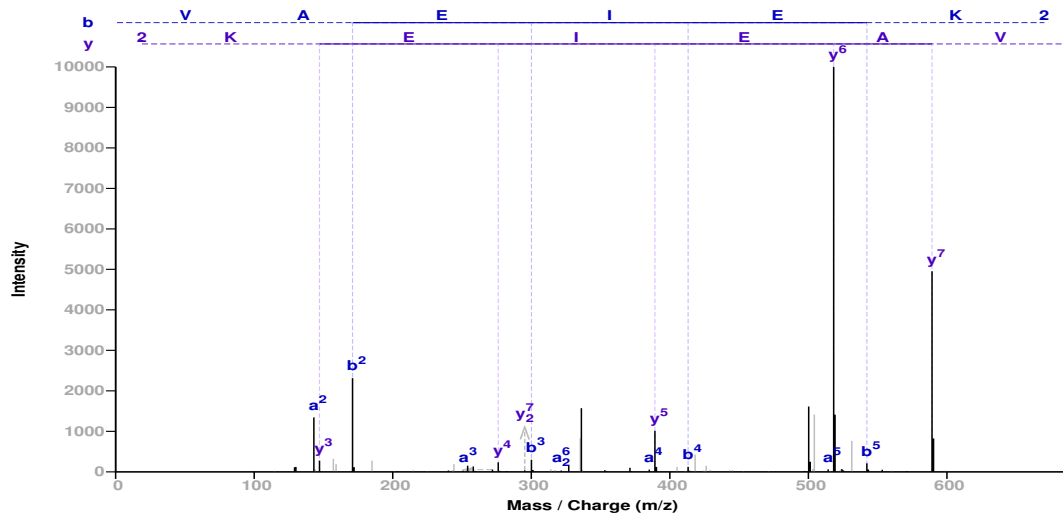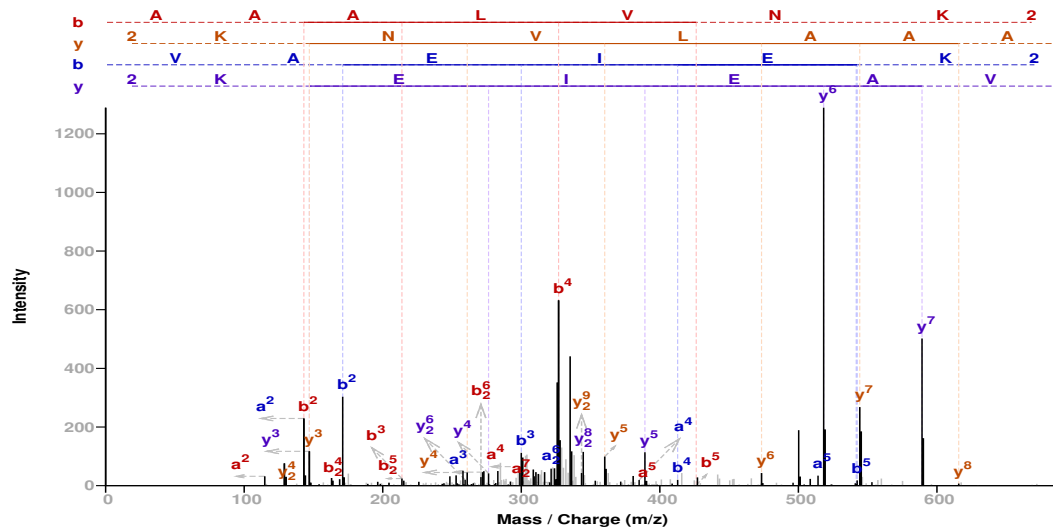



yeast3\_Scan\_Number\_2681 Precursor m/z: 396.721 cosine: 0.857  $\alpha$ : 0.273

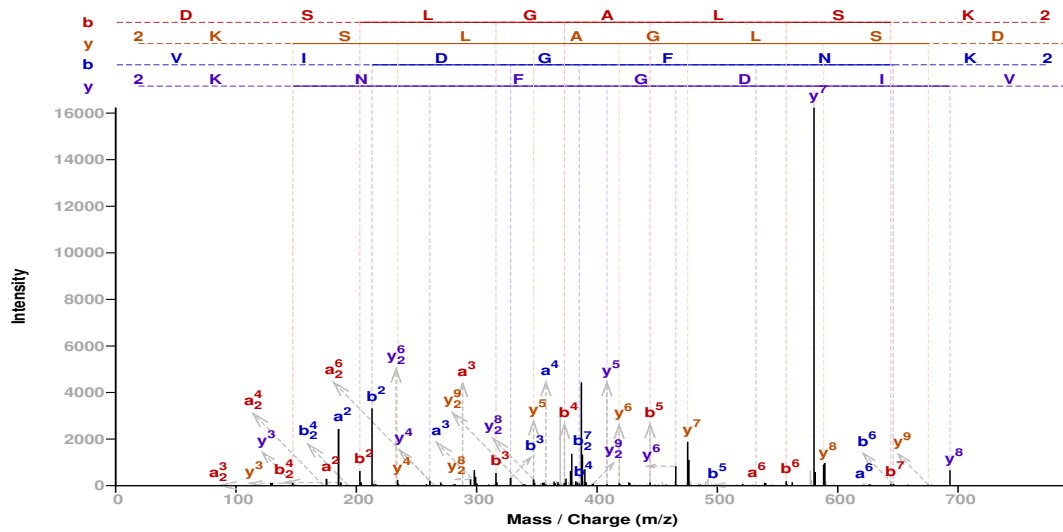



yeast3\_Scan\_Number\_2238 Precursor m/z: 480.767 cosine: 0.744  $\alpha$ : 0.273

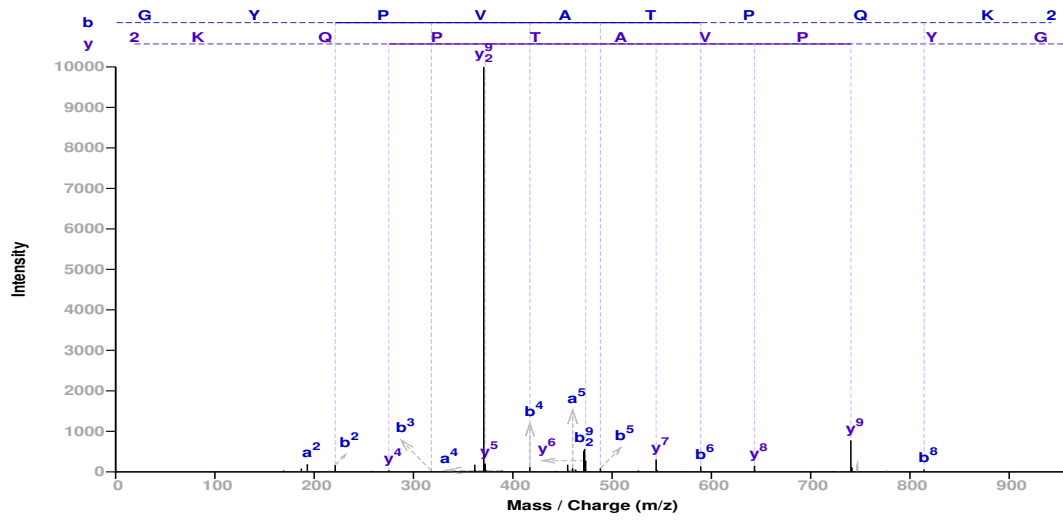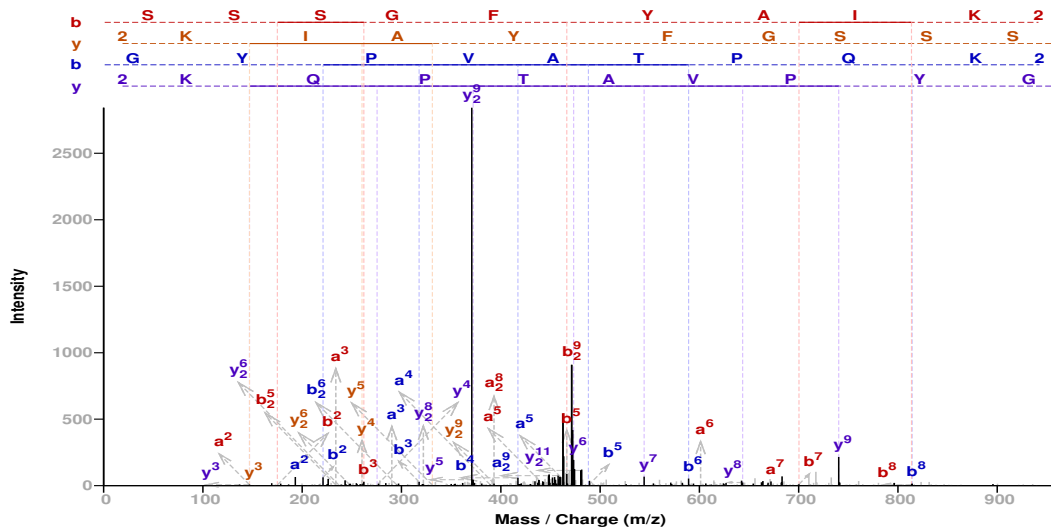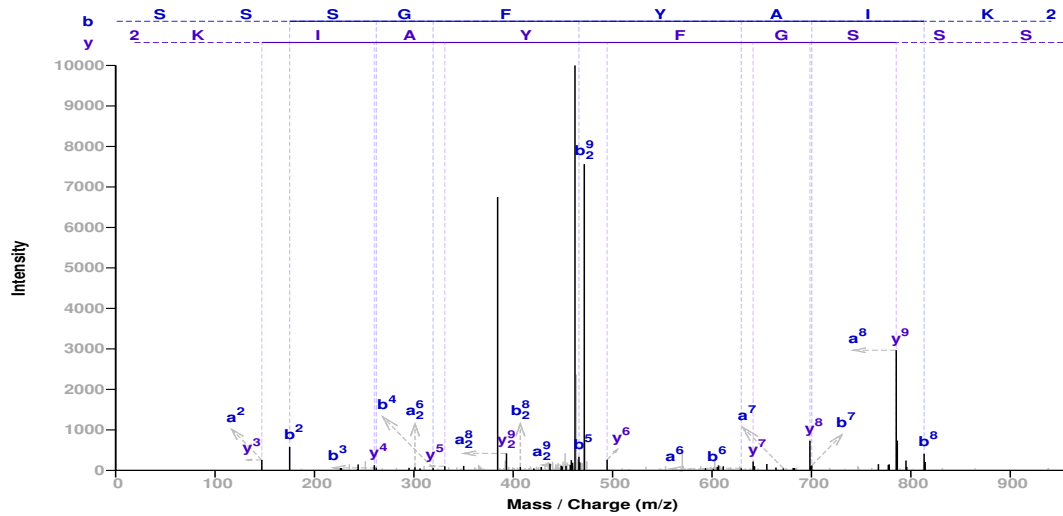

yeast3\_Scan\_Number\_633 Precursor m/z: 402.738 cosine: 0.759  $\alpha$ : 0.272

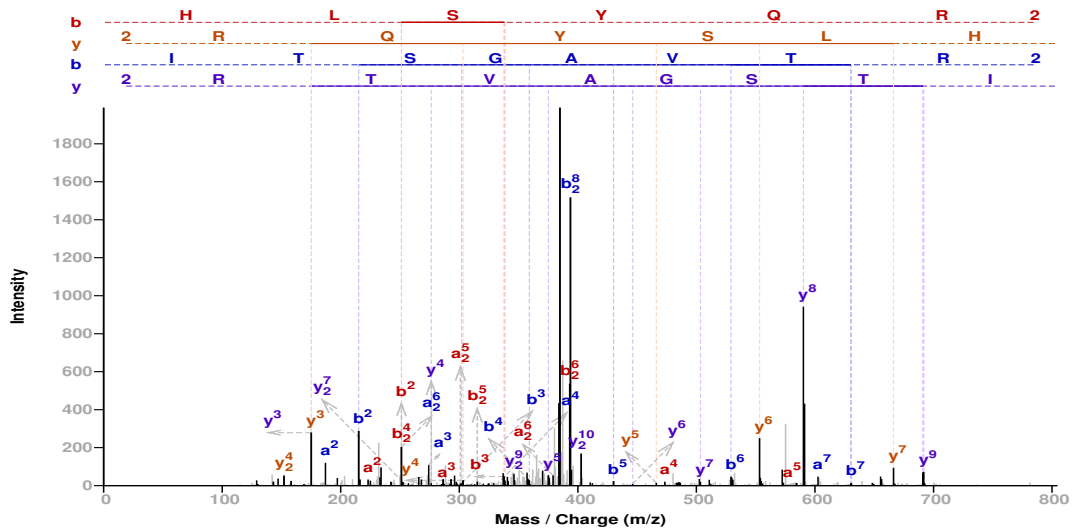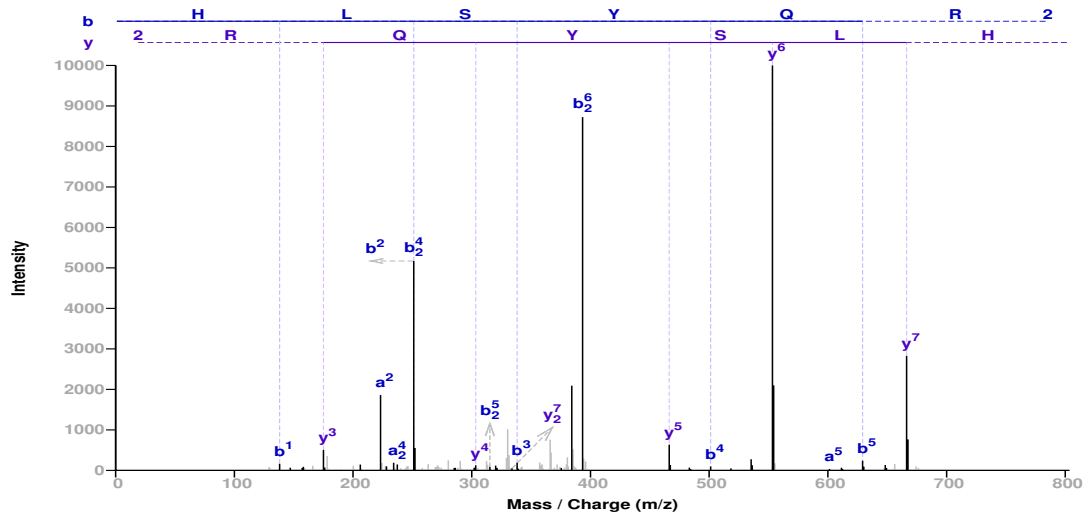

yeast3\_Scan\_Number\_4147 Precursor m/z: 412.882 cosine: 0.932  $\alpha$ : 0.269

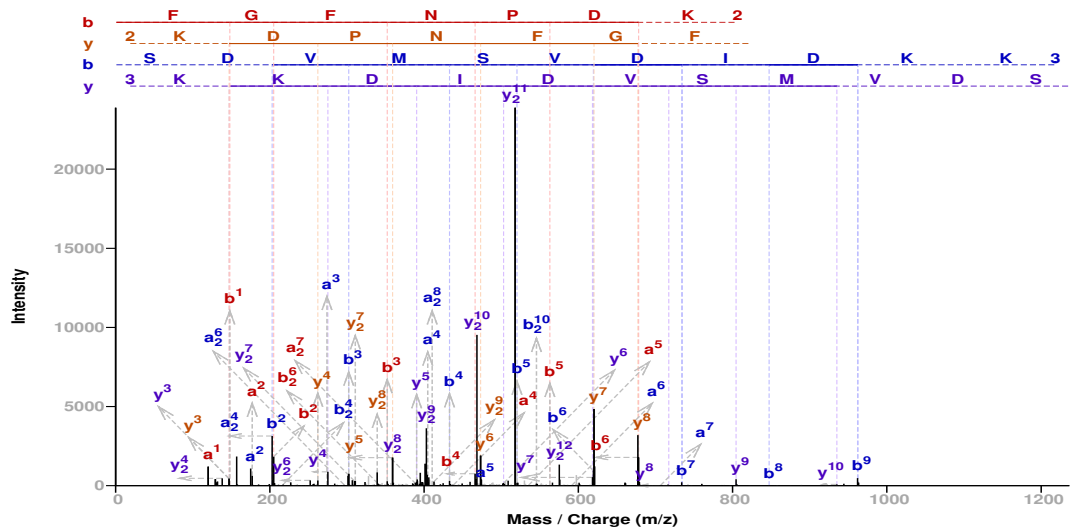

yeast3.Scan\_Number\_6459 Precursor m/z: 537.315 cosine: 0.757  $\alpha$ : 0.267

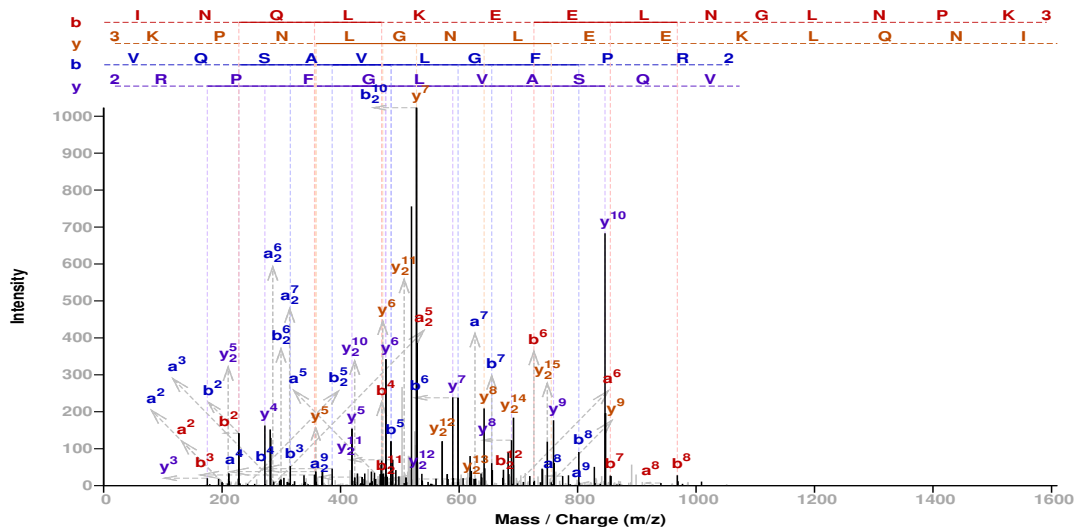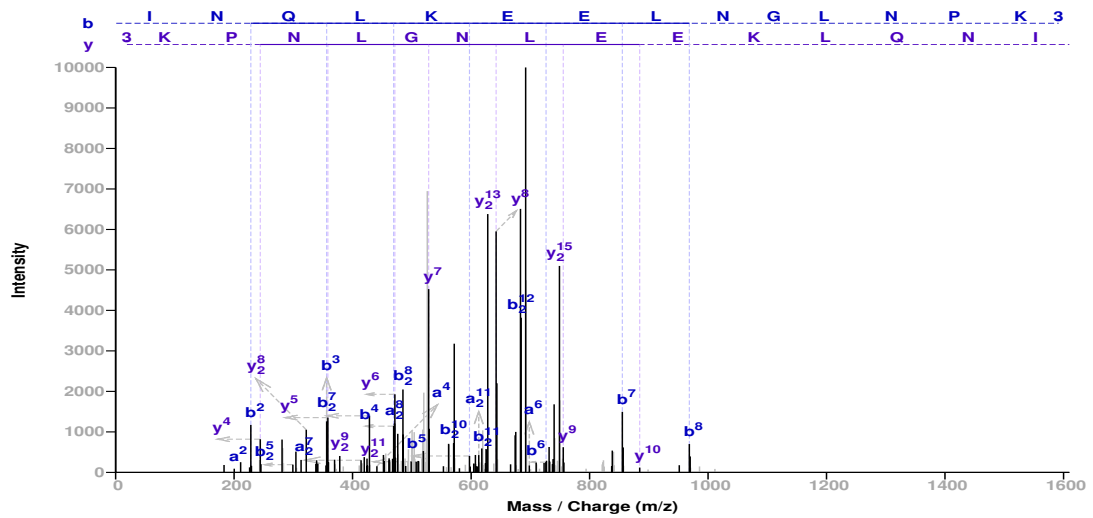

yeast3\_Scan\_Number\_2698 Precursor m/z: 428.198 cosine: 0.833  $\alpha$ : 0.266

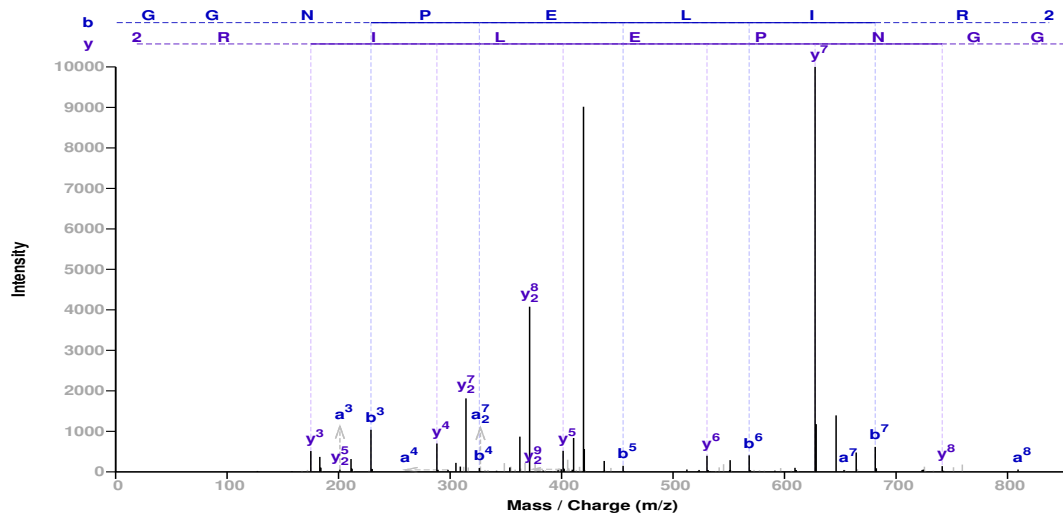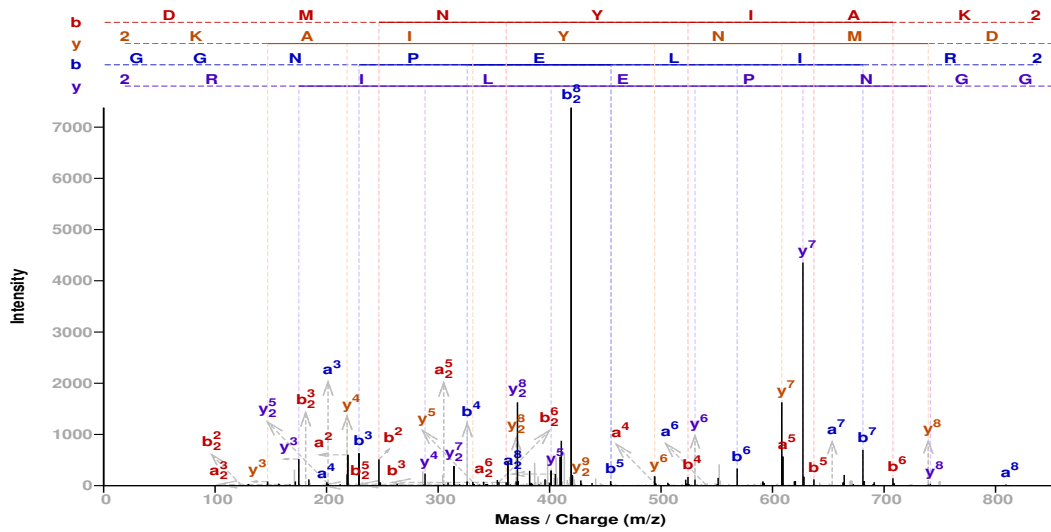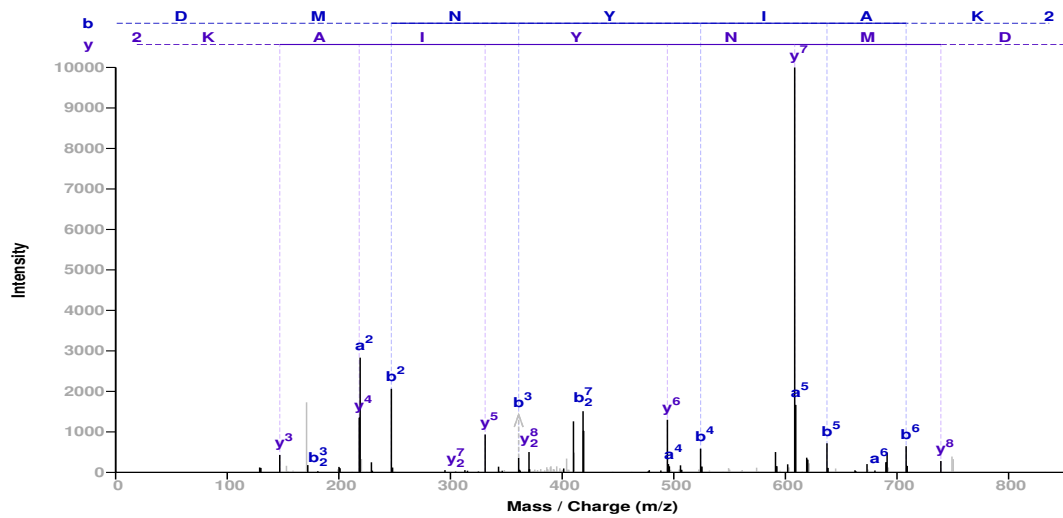

yeast3.Scan\_Number\_2760 Precursor m/z: 521.622 cosine: 0.780  $\alpha$ : 0.266

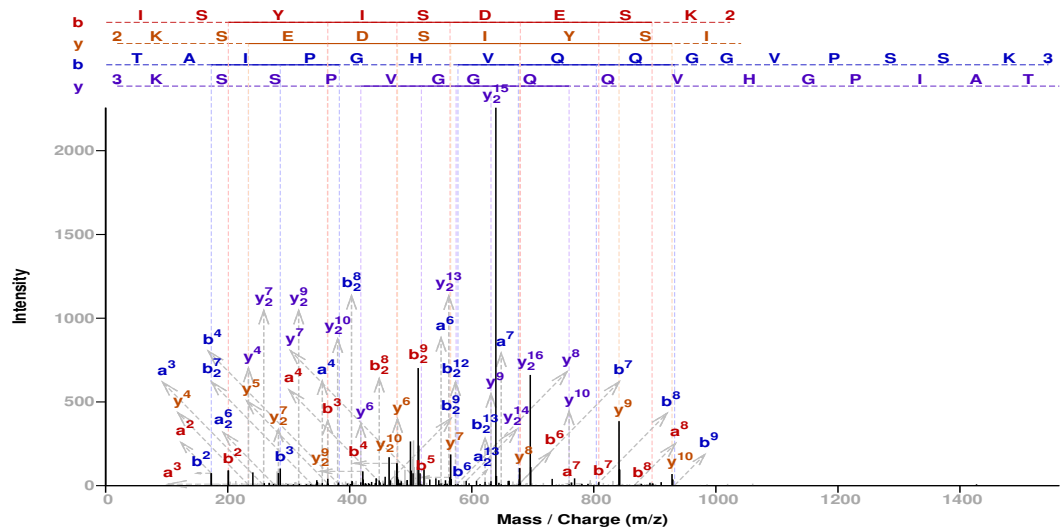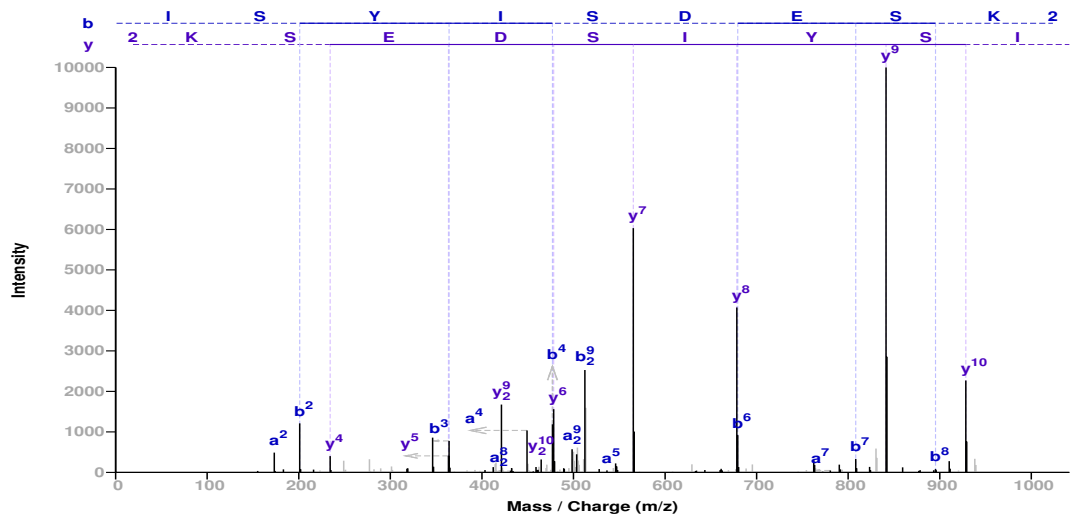

yeast3\_Scan\_Number\_3988 Precursor m/z: 530.293 cosine: 0.860  $\alpha$ : 0.260

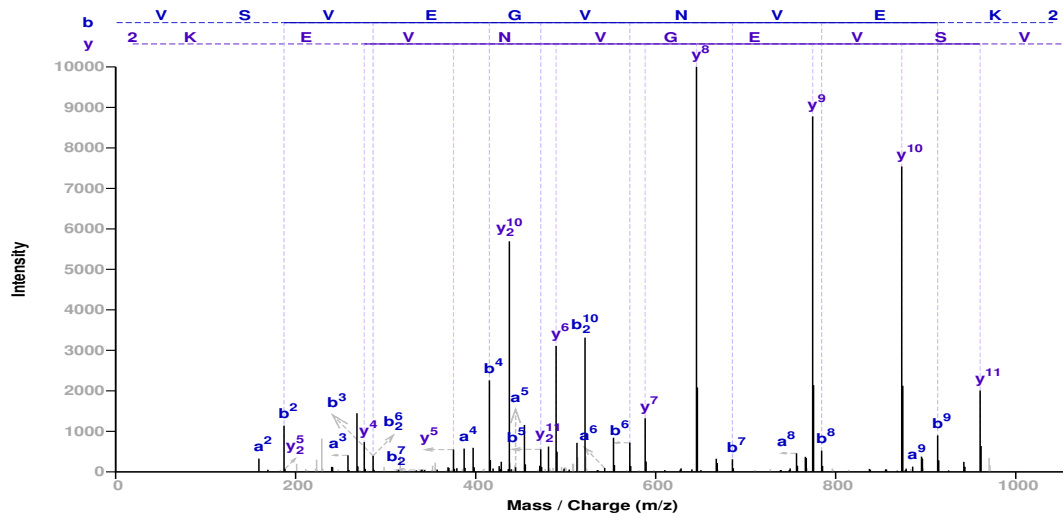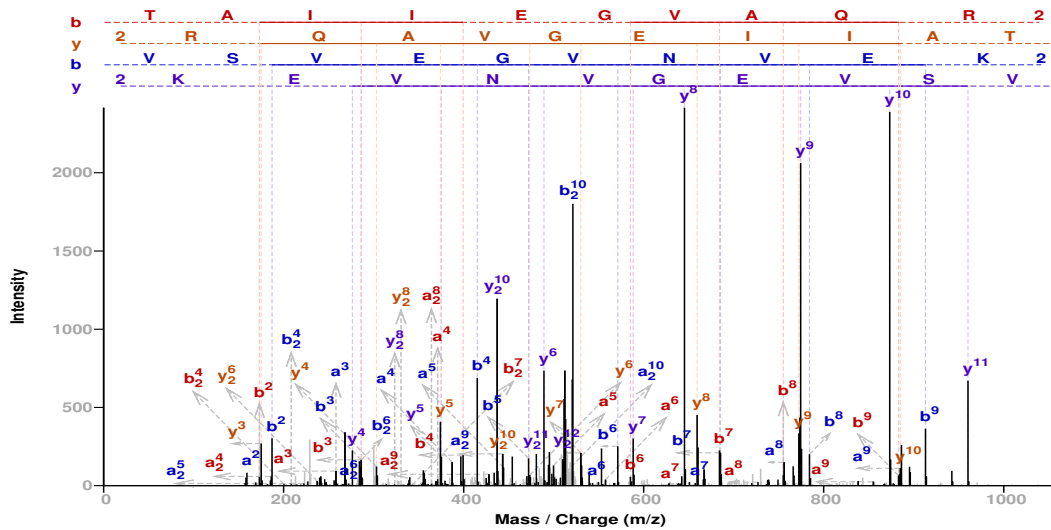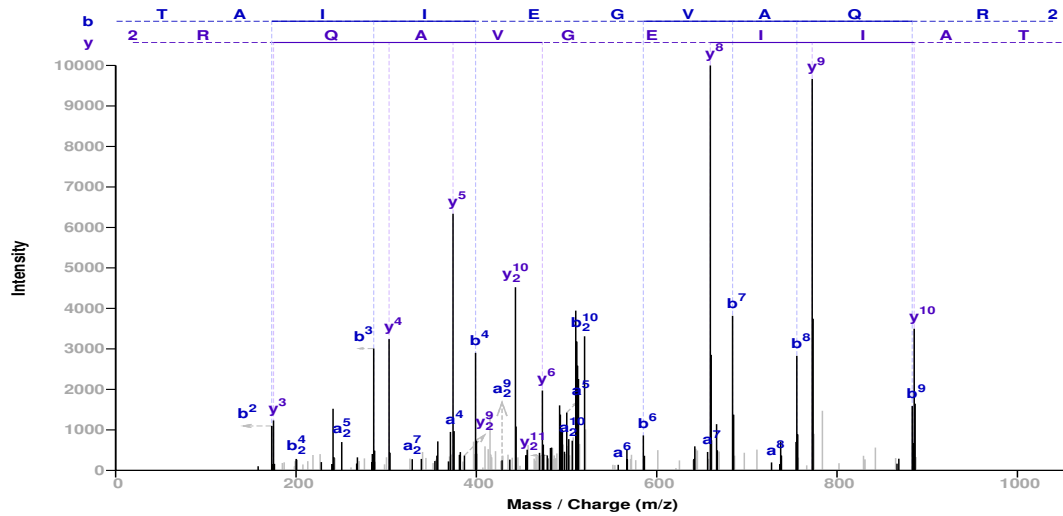

yeast3\_Scan\_Number\_1696 Precursor m/z: 552.790 cosine: 0.778  $\alpha$ : 0.259

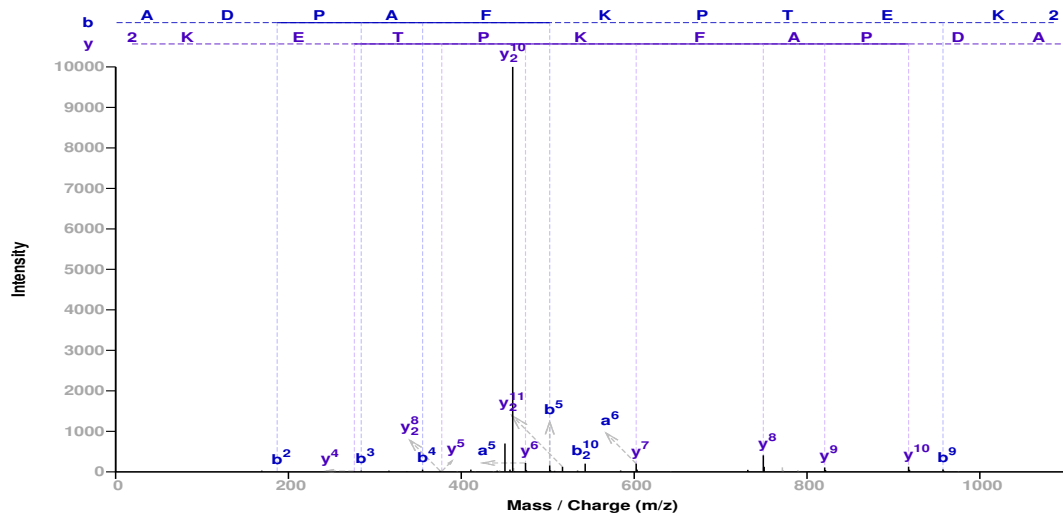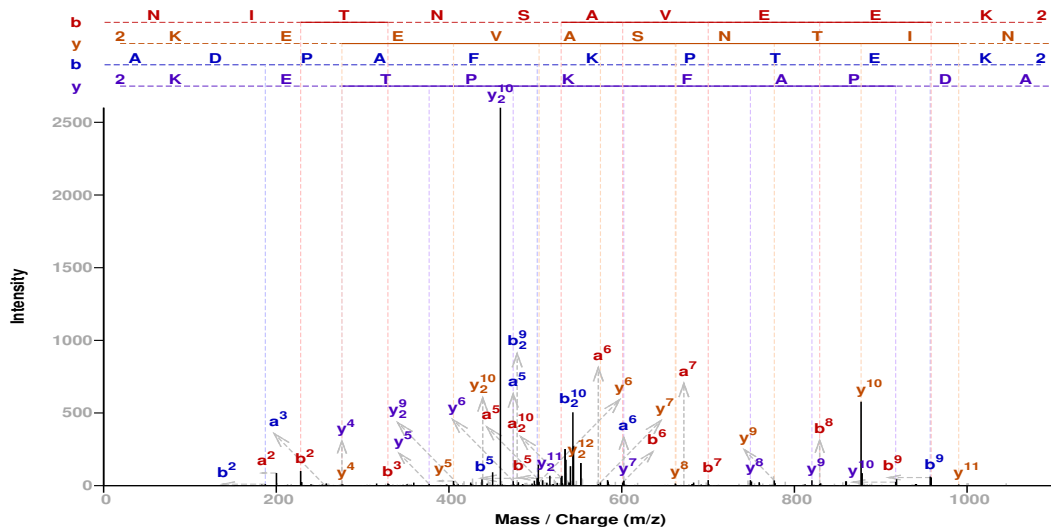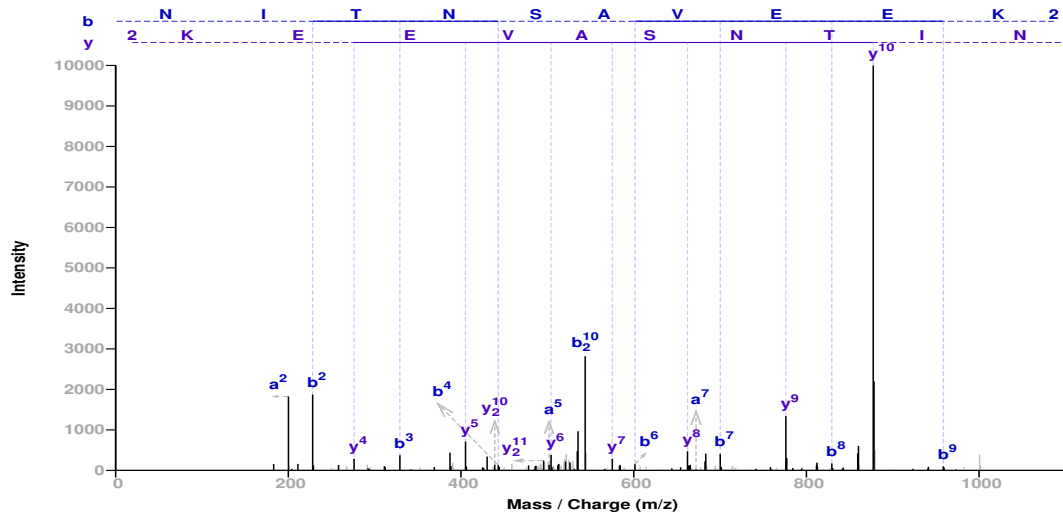



yeast3\_Scan\_Number\_9441 Precursor m/z: 664.384 cosine: 0.742  $\alpha$ : 0.256

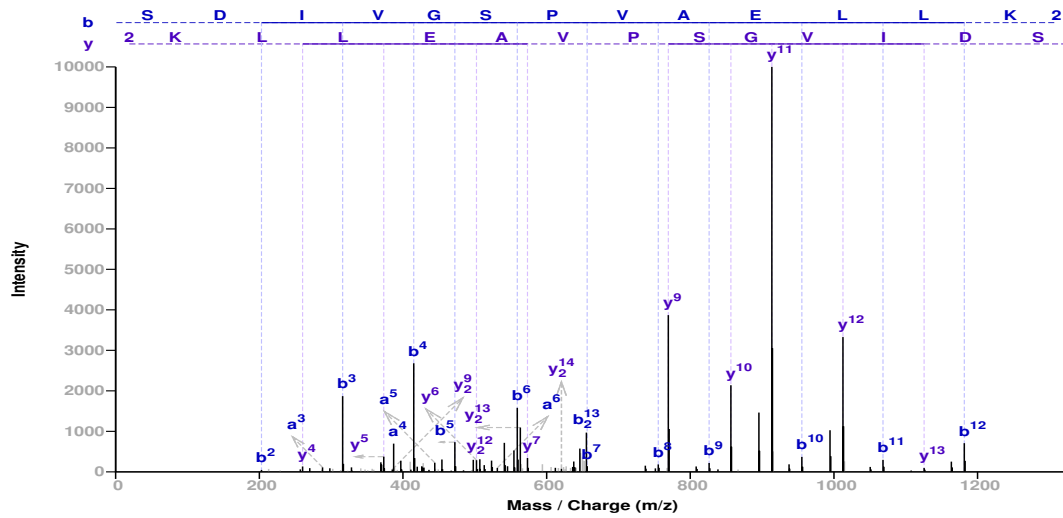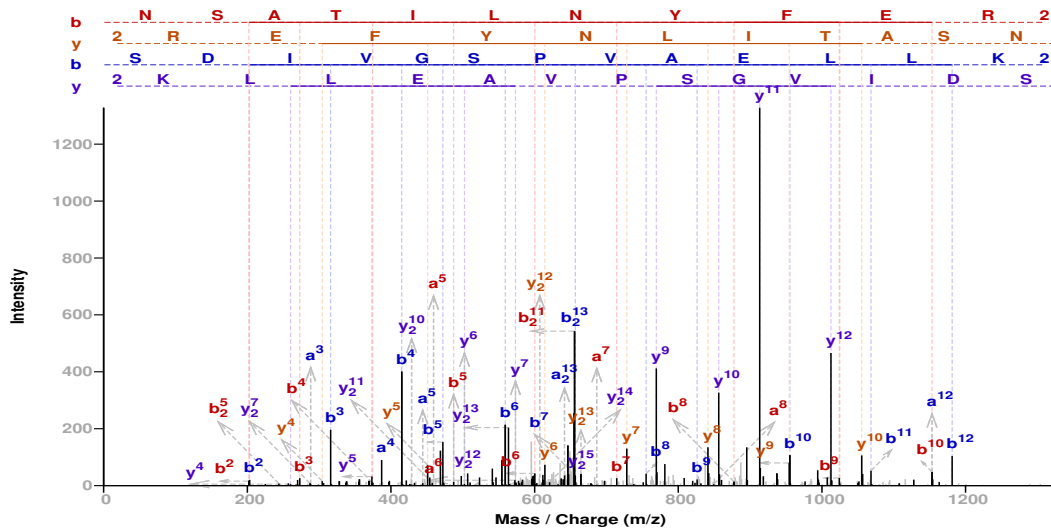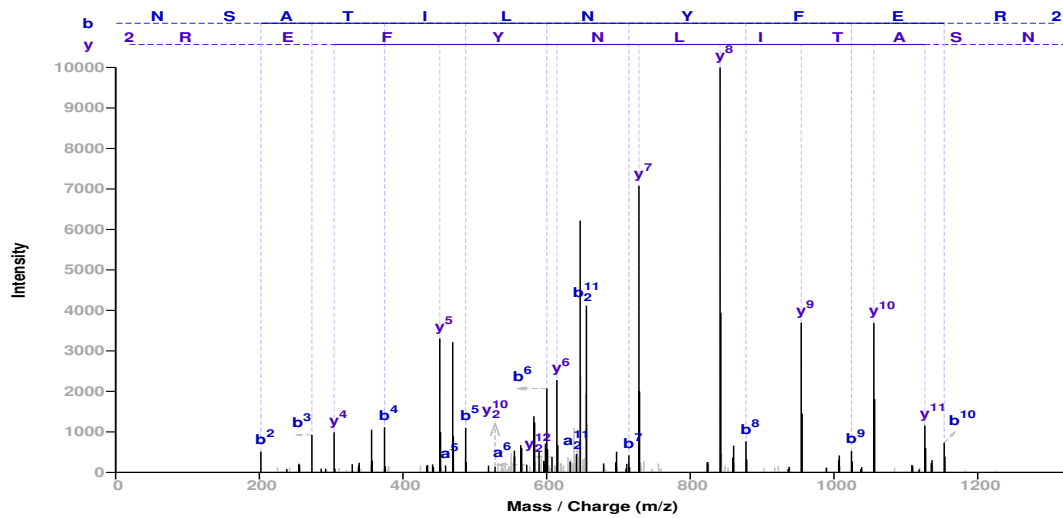

yeast3\_Scan\_Number.1914 Precursor m/z: 509.268 cosine: 0.760  $\alpha$ : 0.255

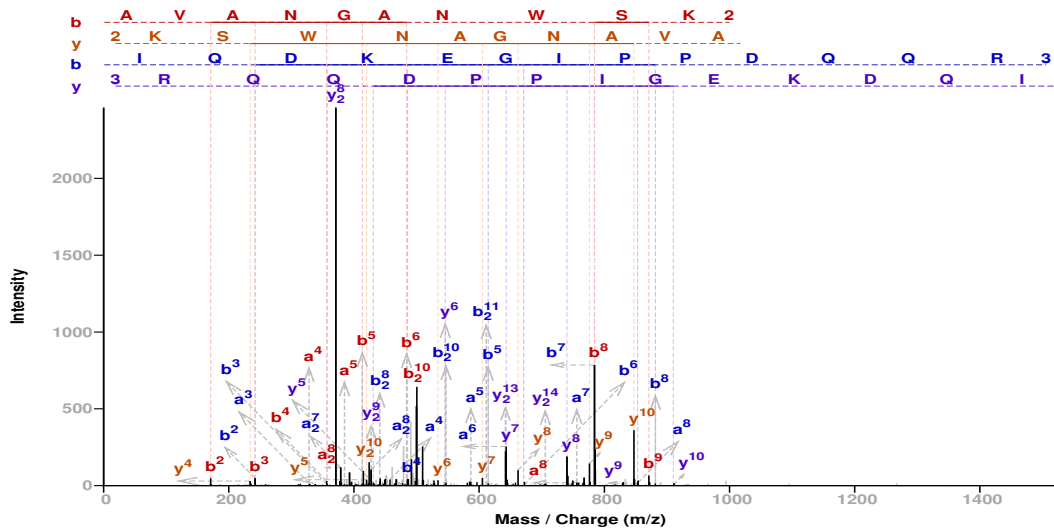

yeast3\_Scan\_Number\_3739 Precursor m/z: 442.769 cosine: 0.767  $\alpha$ : 0.251

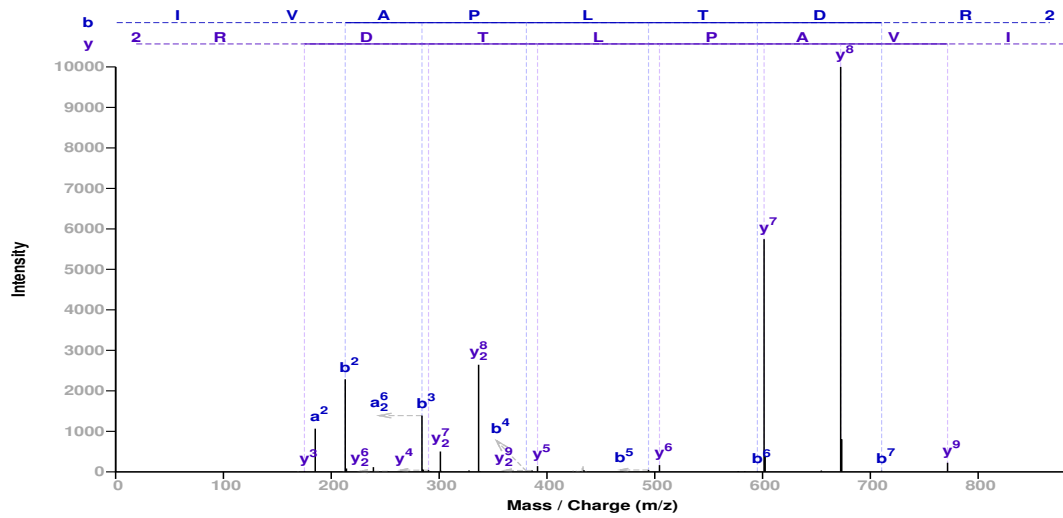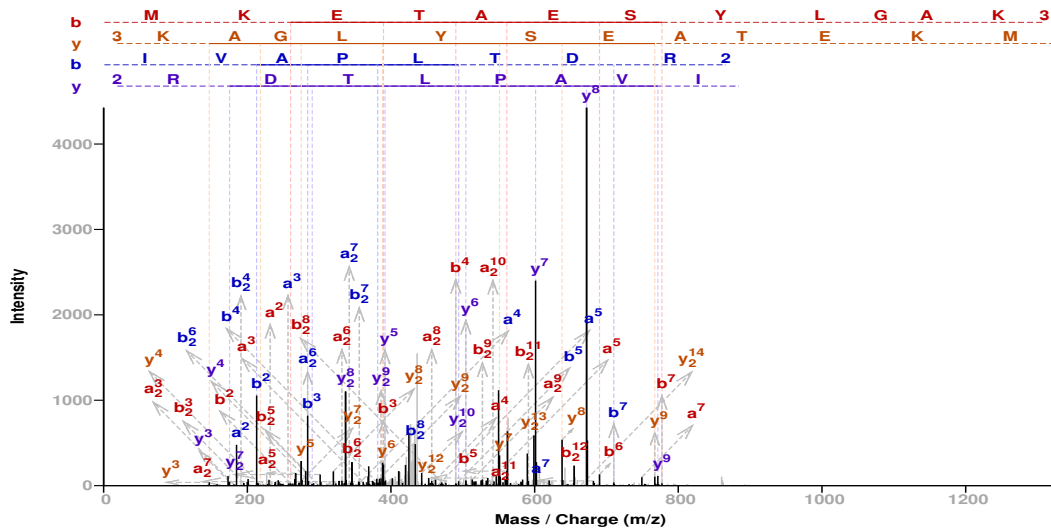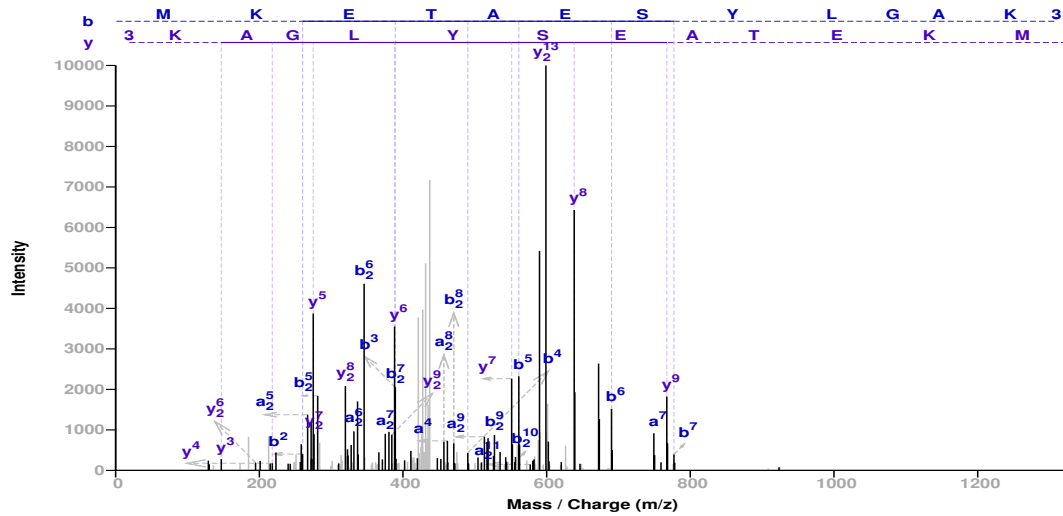

yeast3.Scan\_Number\_7219 Precursor m/z: 687.692 cosine: 0.761  $\alpha$ : 0.246

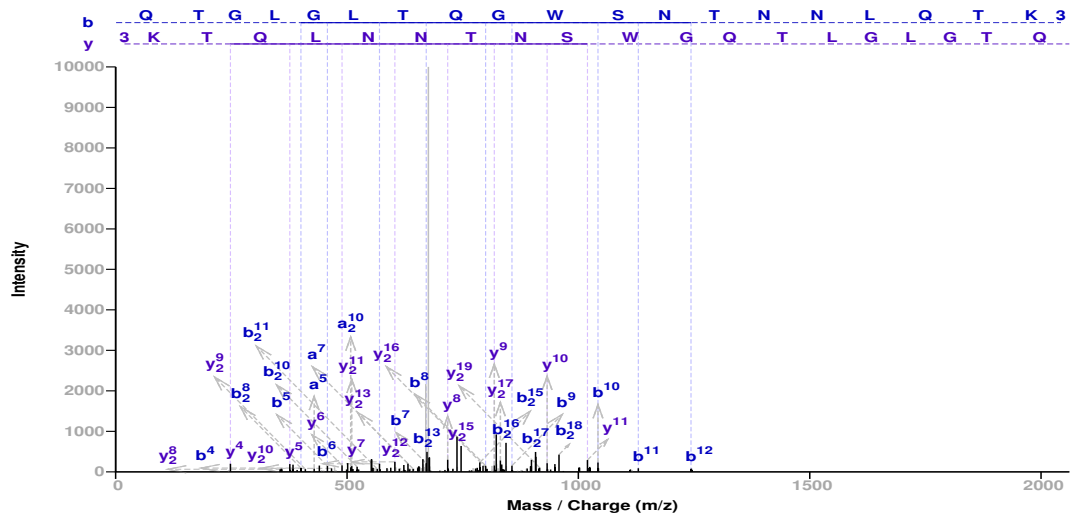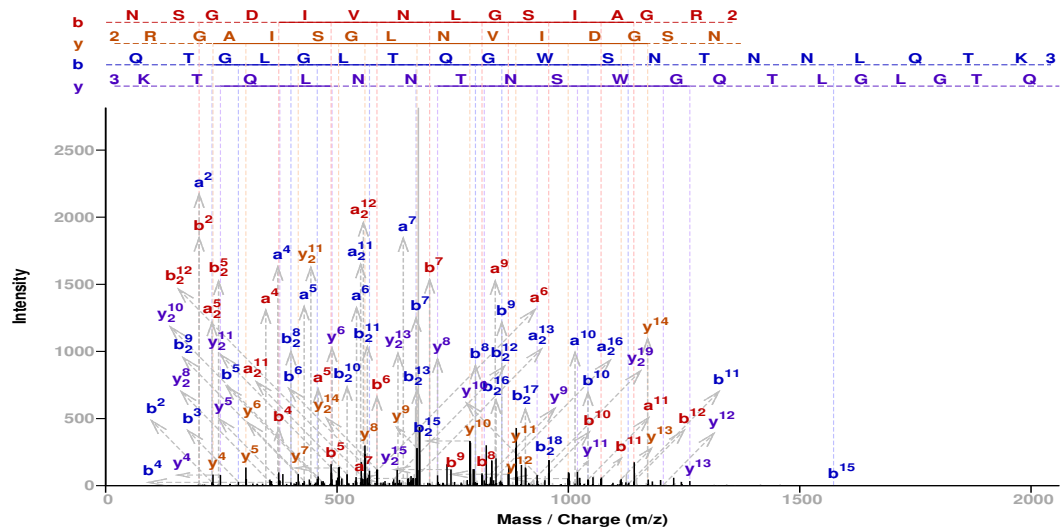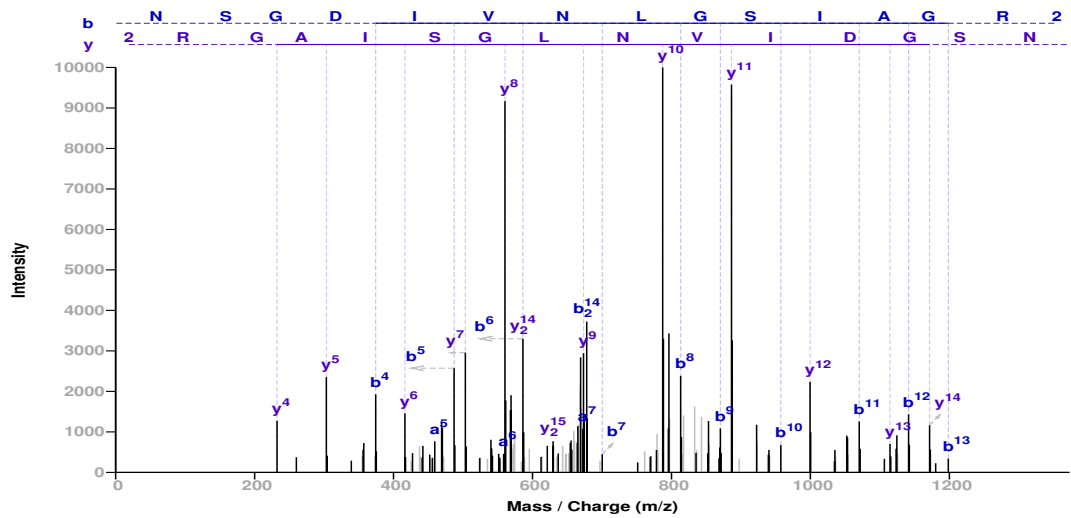

yeast3\_Scan\_Number\_770 Precursor m/z: 405.746 cosine: 0.837  $\alpha$ : 0.240

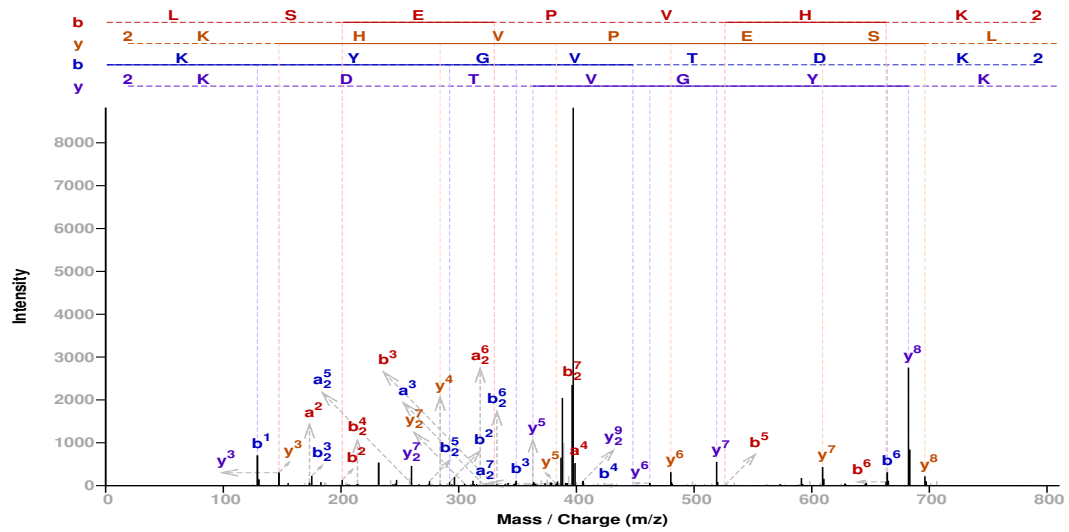

yeast3\_Scan\_Number\_3878 Precursor m/z: 479.260 cosine: 0.852  $\alpha$ : 0.237

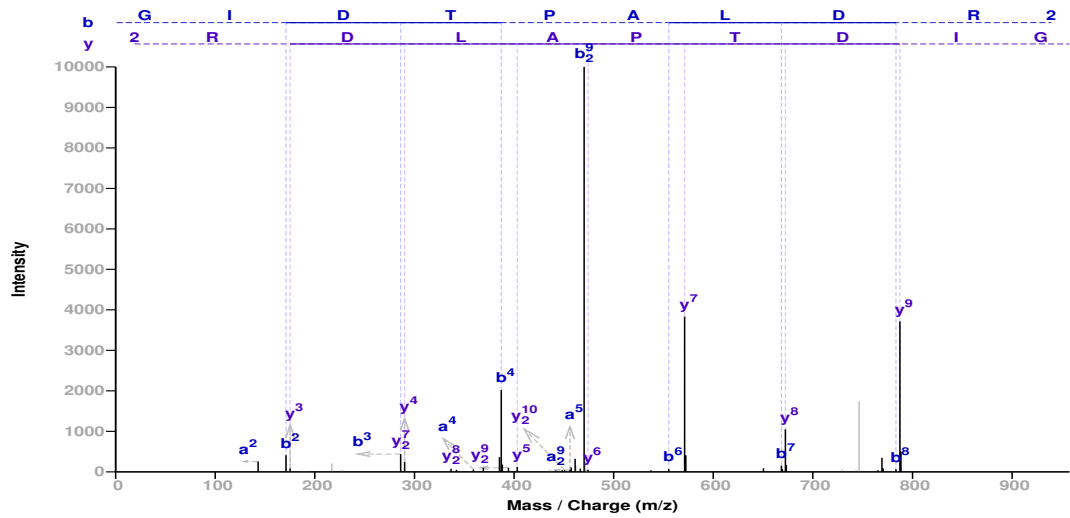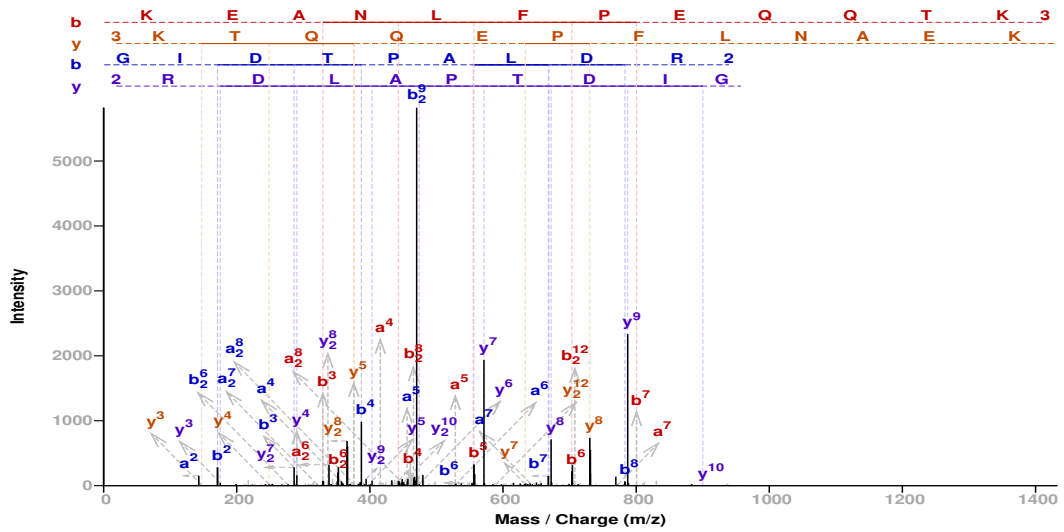

yeast3.Scan\_Number\_2630 Precursor m/z: 365.732 cosine: 0.850  $\alpha$ : 0.232

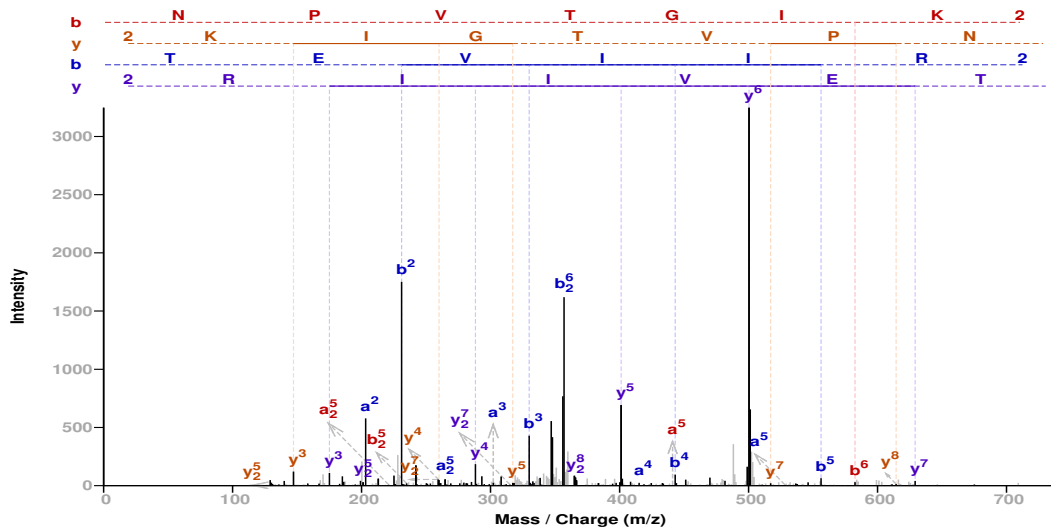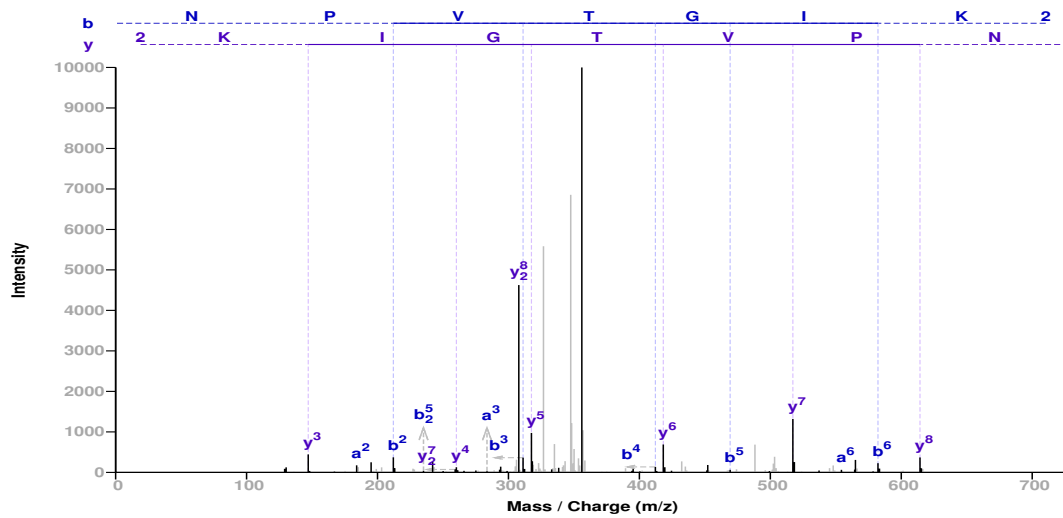

yeast3\_Scan\_Number\_2169 Precursor m/z: 424.254 cosine: 0.949  $\alpha$ : 0.224

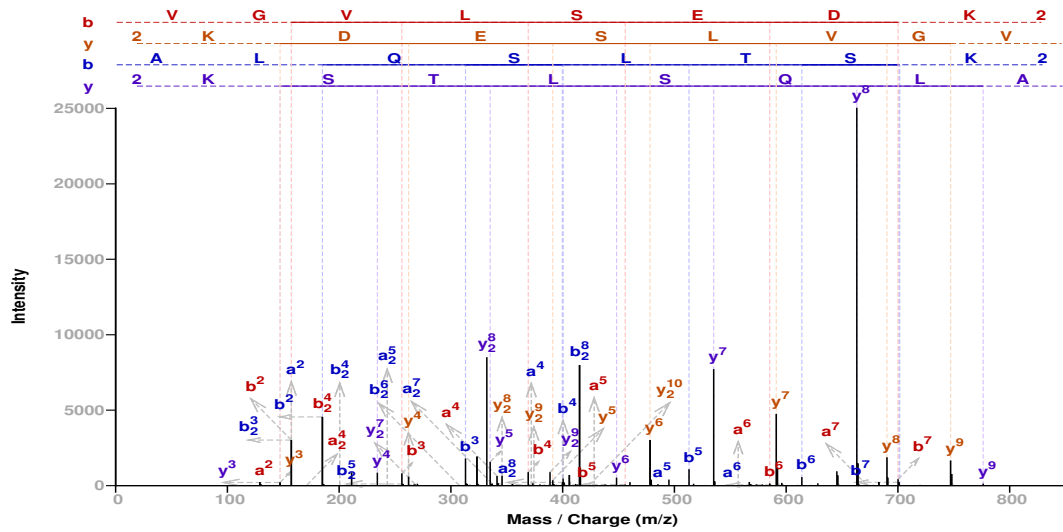



yeast3\_Scan\_Number\_3818 Precursor m/z: 449.229 cosine: 0.870  $\alpha$ : 0.216

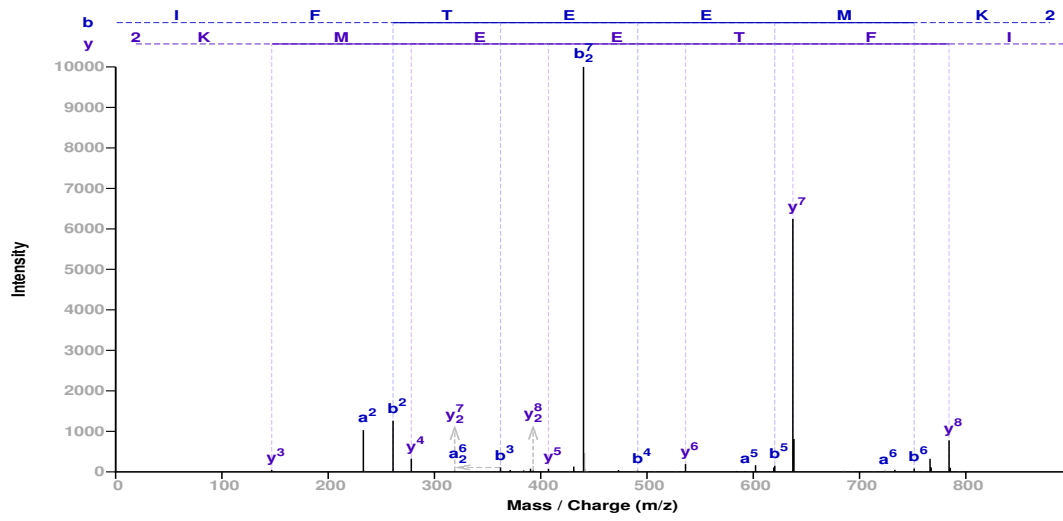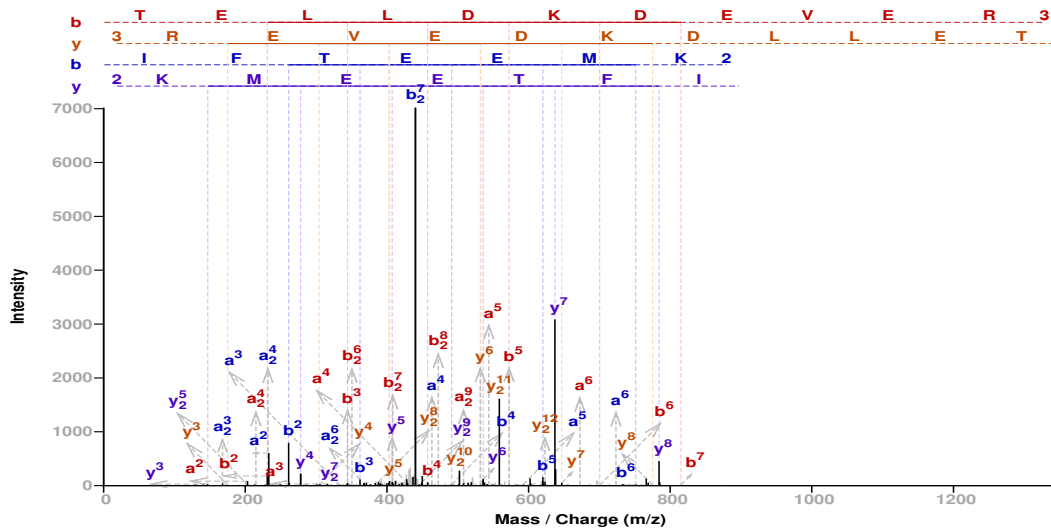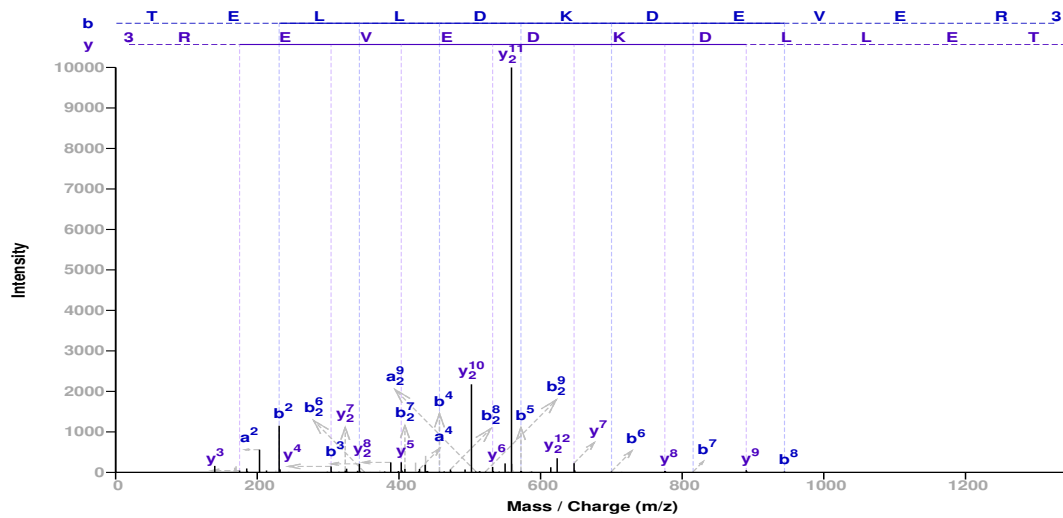

yeast3\_Scan\_Number\_6390 Precursor m/z: 813.372 cosine: 0.806  $\alpha$ : 0.210

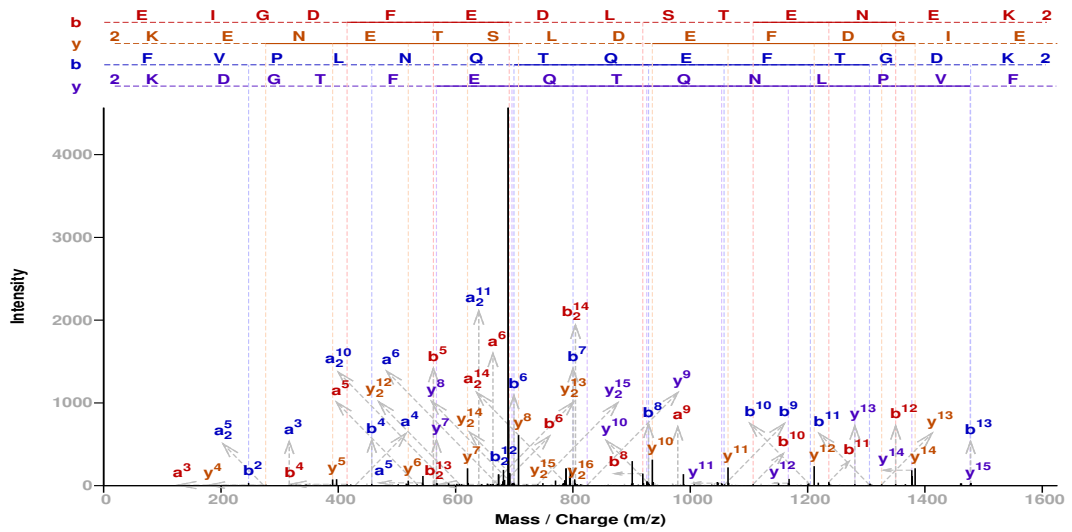

yeast3\_Scan\_Number\_1282 Precursor m/z: 355.705 cosine: 0.858  $\alpha$ : 0.209

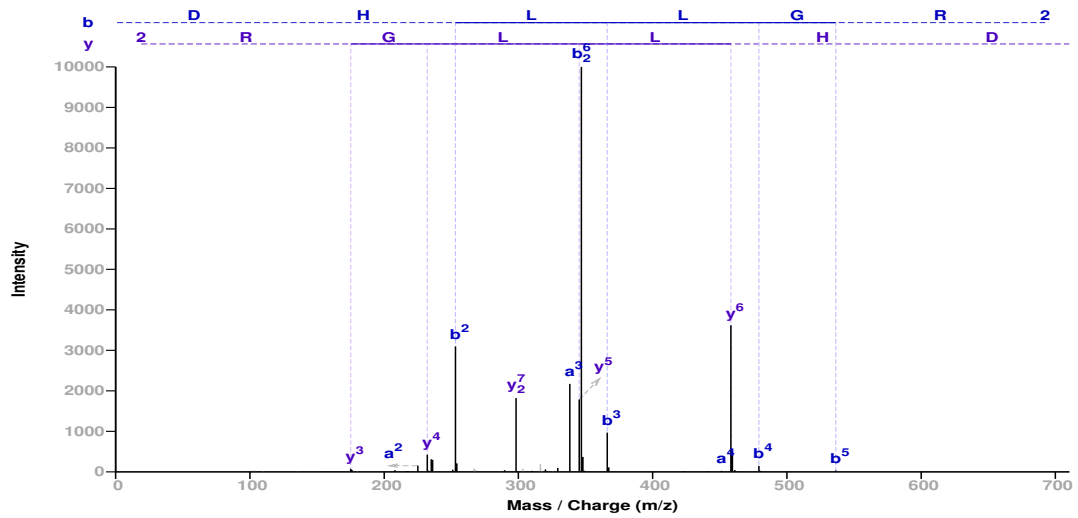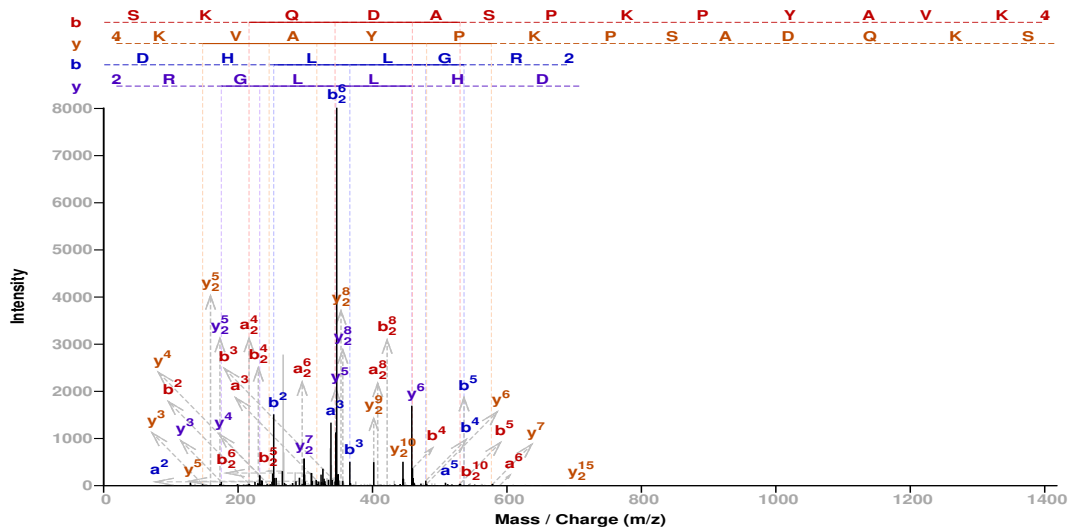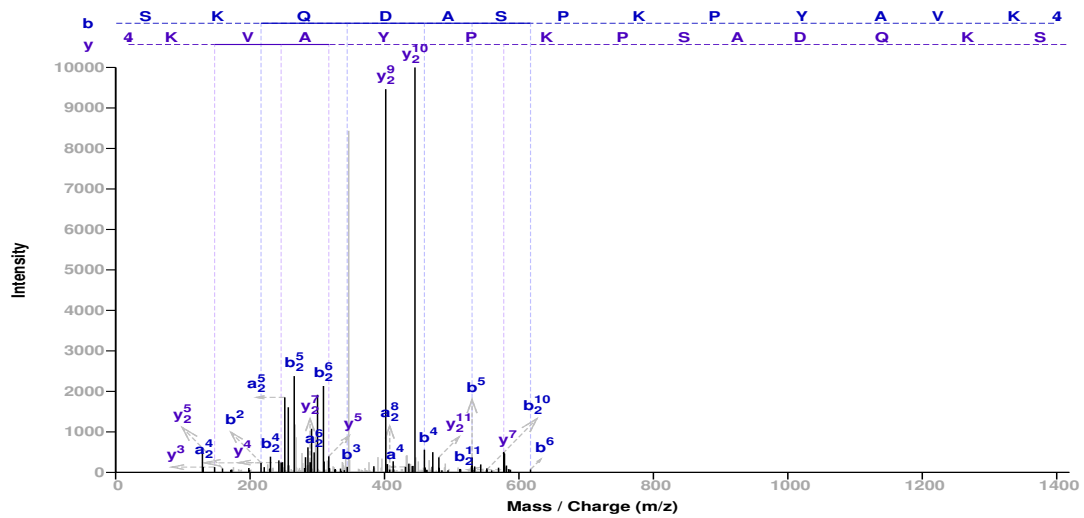



yeast3.Scan\_Number\_3566 Precursor m/z: 511.922 cosine: 0.809  $\alpha$ : 0.201

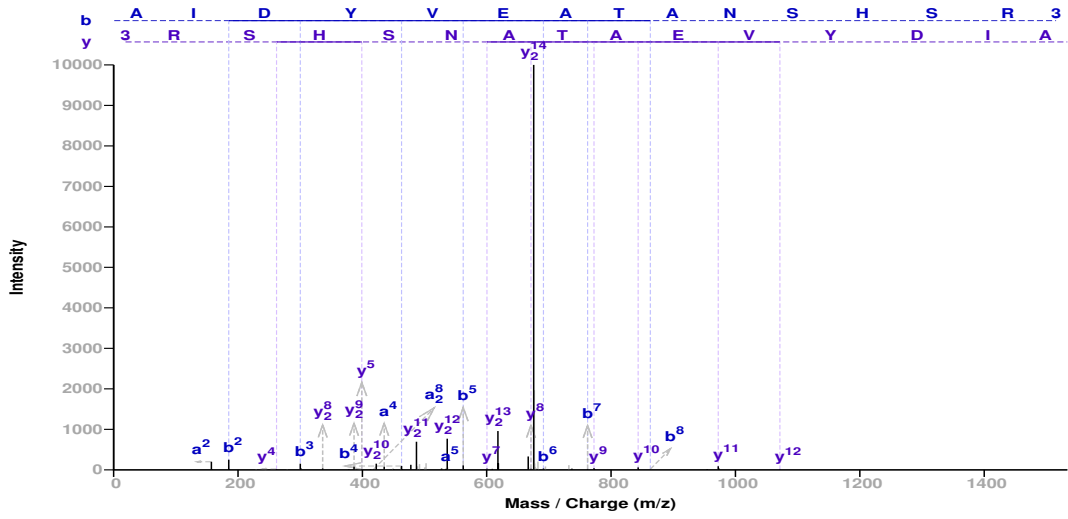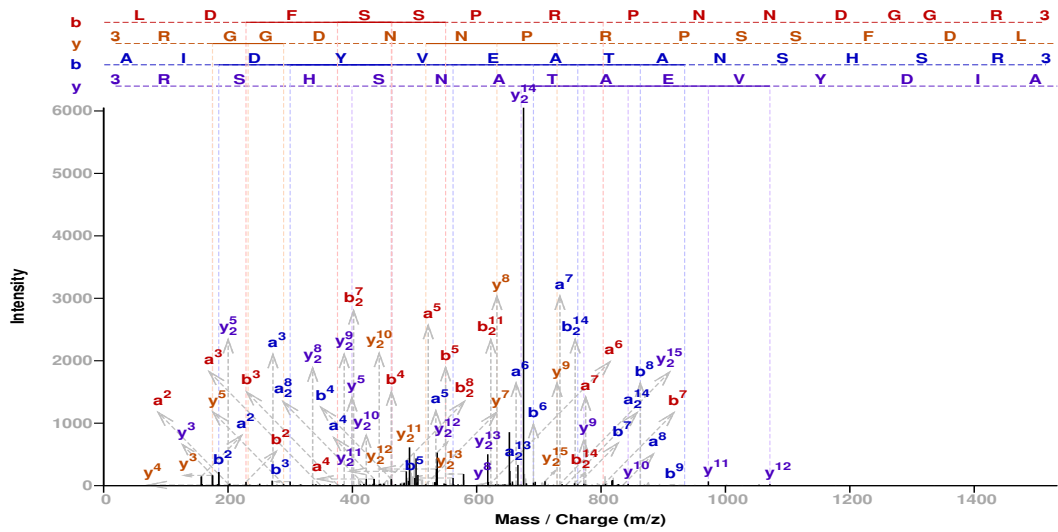

yeast3\_Scan\_Number\_3423 Precursor m/z: 519.766 cosine: 0.815  $\alpha$ : 0.189

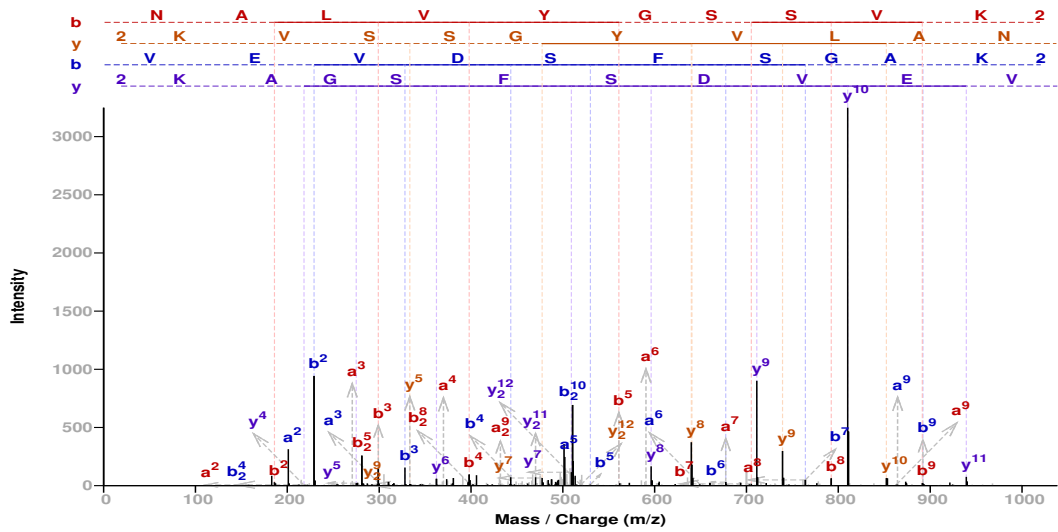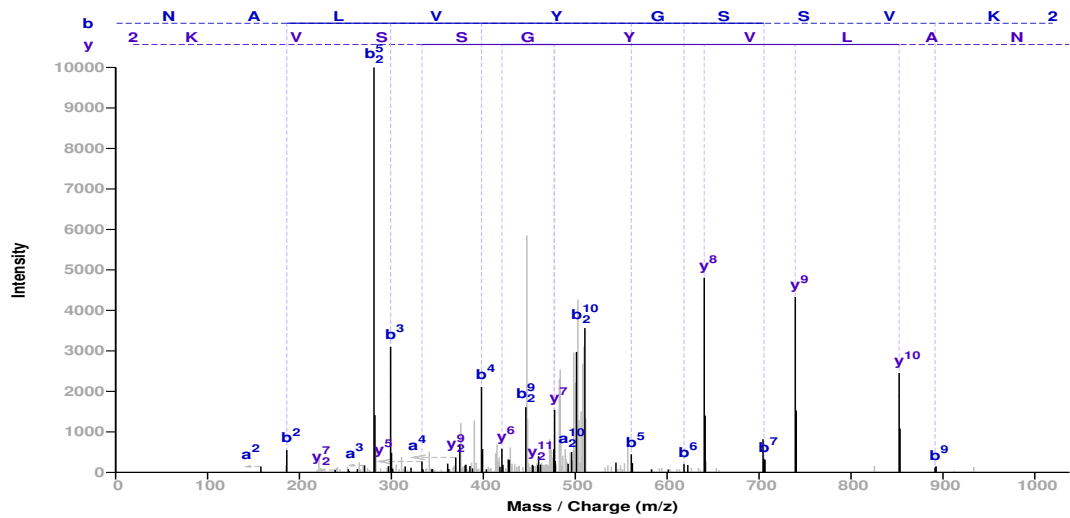

yeast3\_Scan\_Number\_5204 Precursor m/z: 538.297 cosine: 0.881  $\alpha$ : 0.177

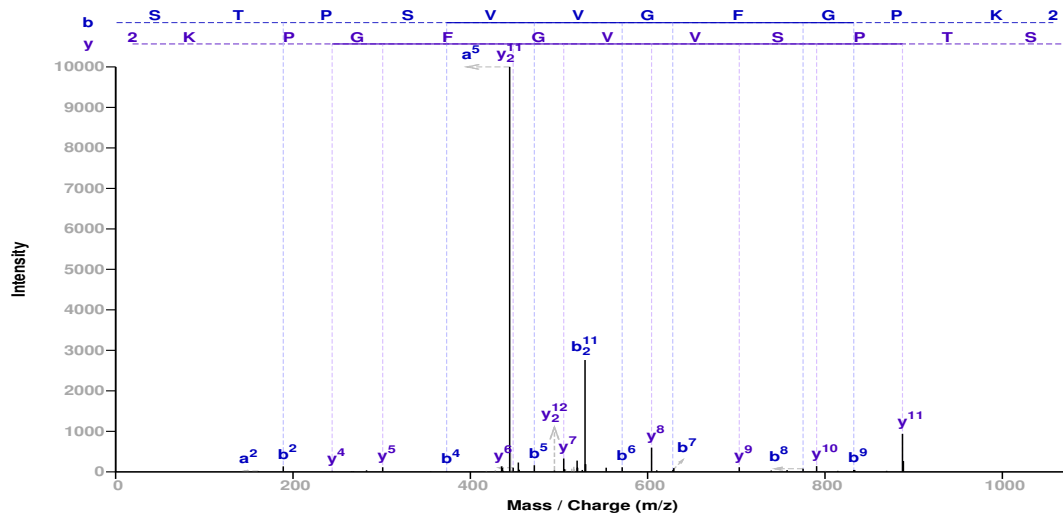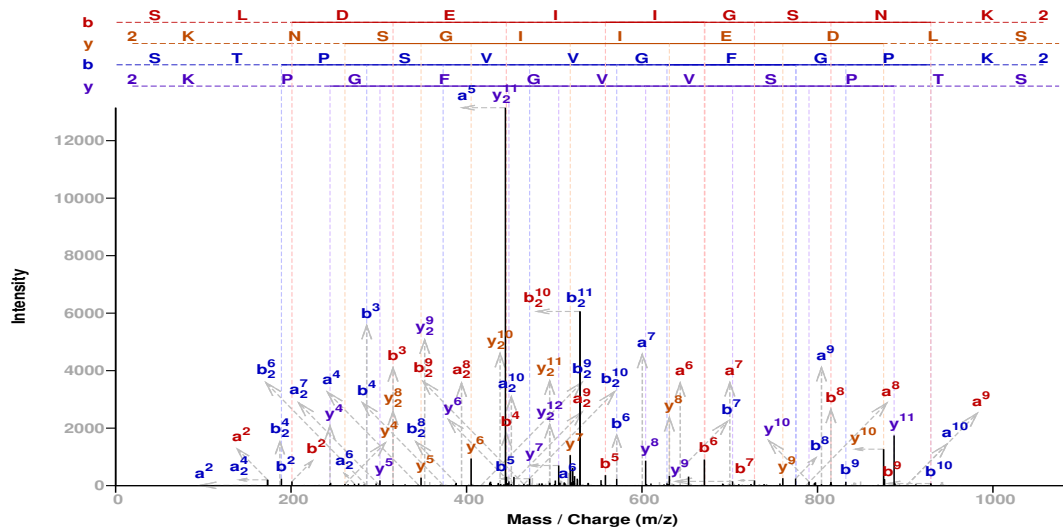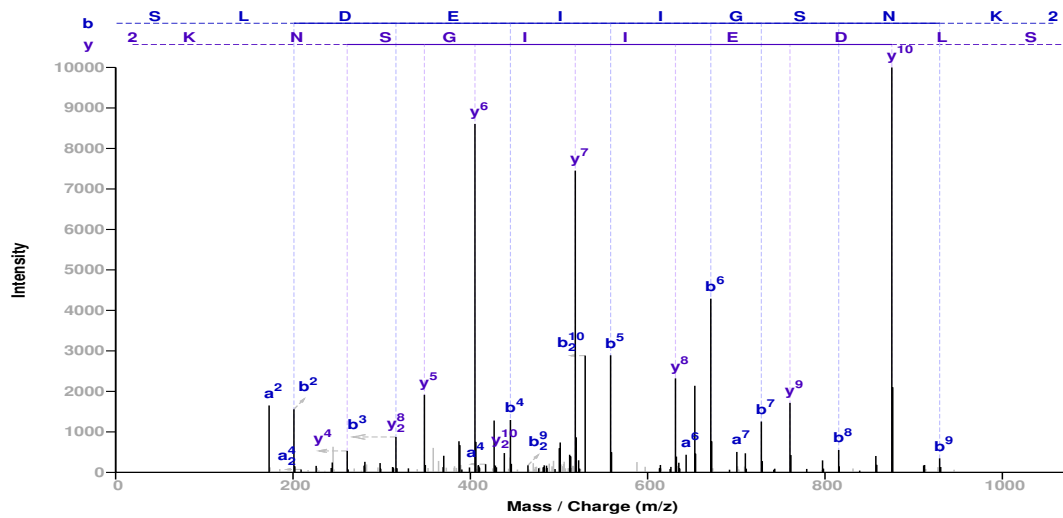





yeast3.Scan\_Number\_3171 Precursor m/z: 352.215 cosine: 0.931  $\alpha$ : 0.174

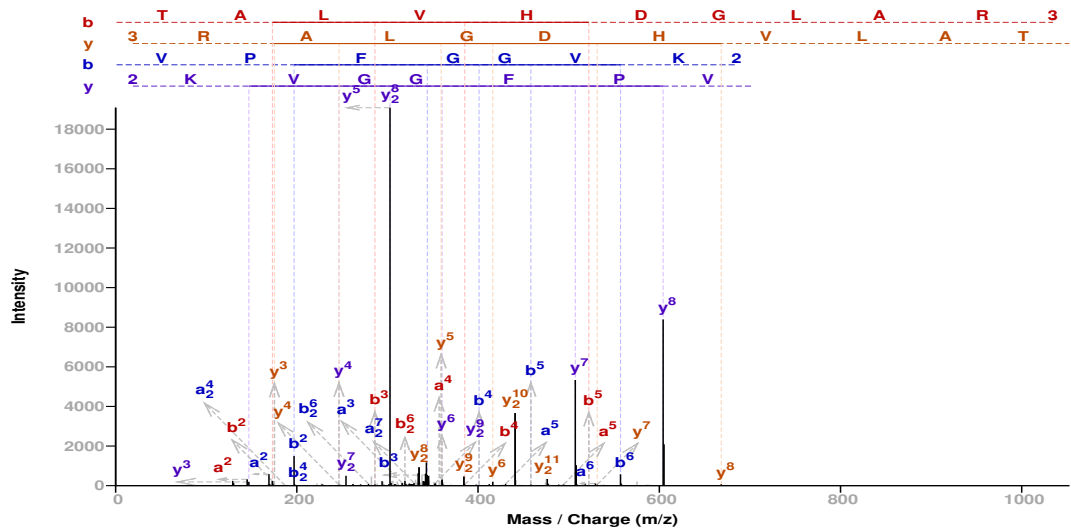

yeast3\_Scan\_Number\_6607 Precursor m/z: 638.345 cosine: 0.753  $\alpha$ : 0.170

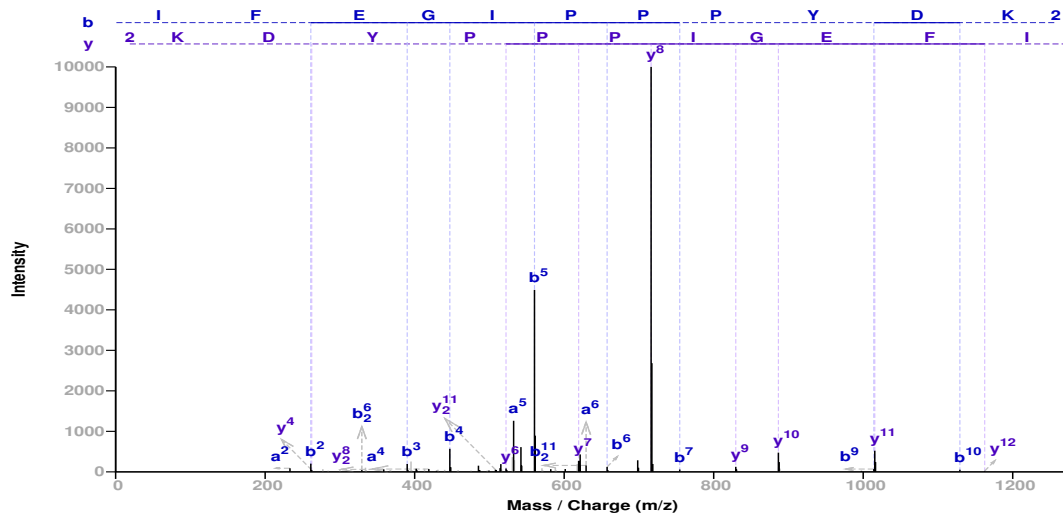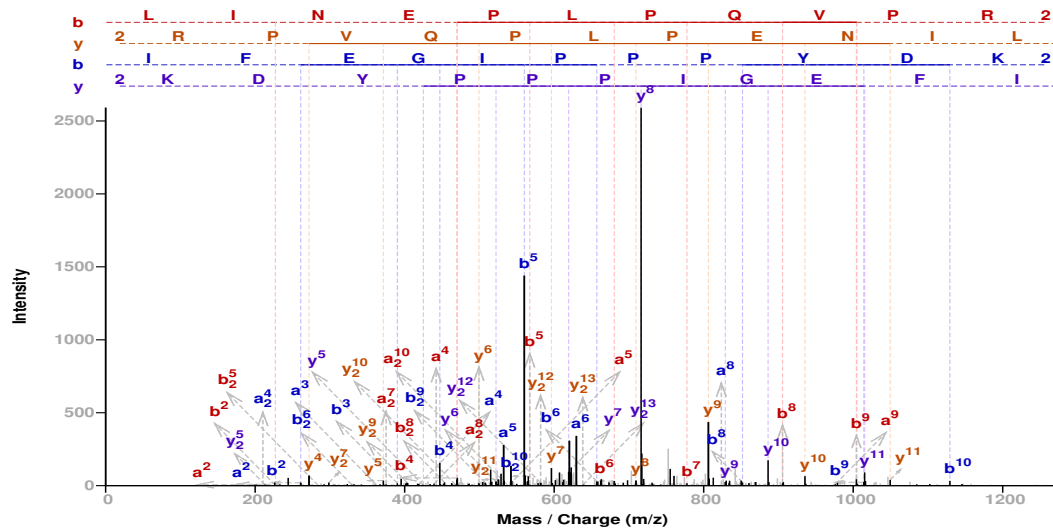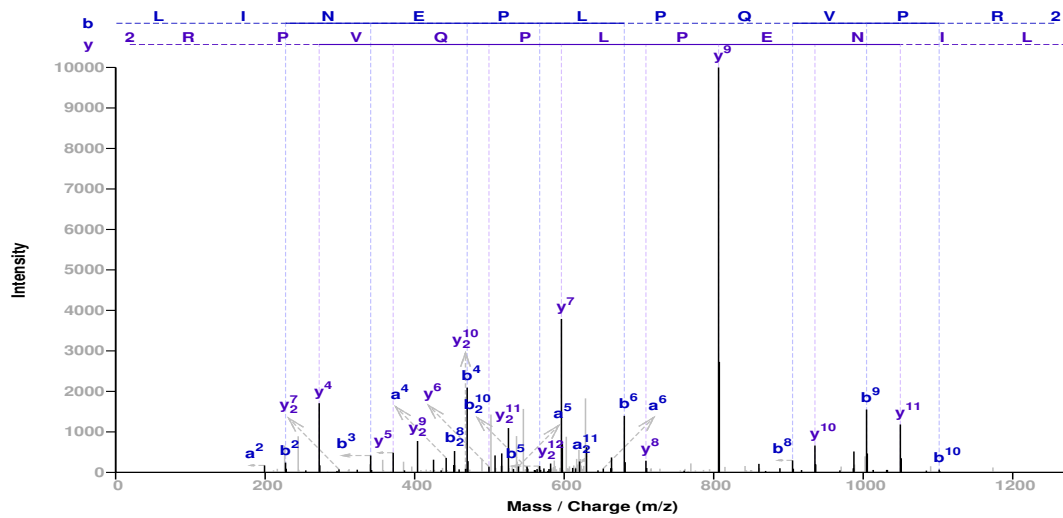

yeast3\_Scan\_Number\_5700 Precursor m/z: 529.624 cosine: 0.806  $\alpha$ : 0.154

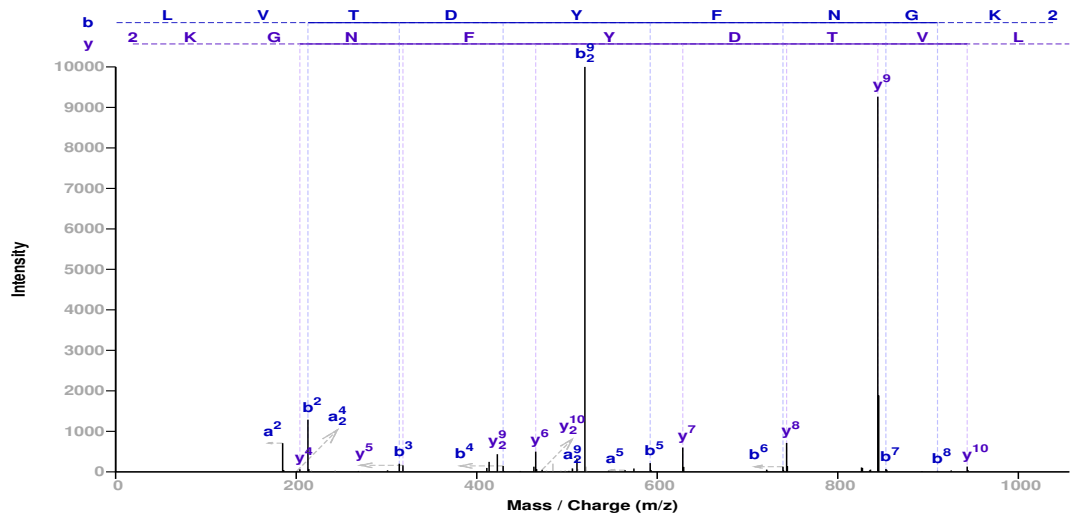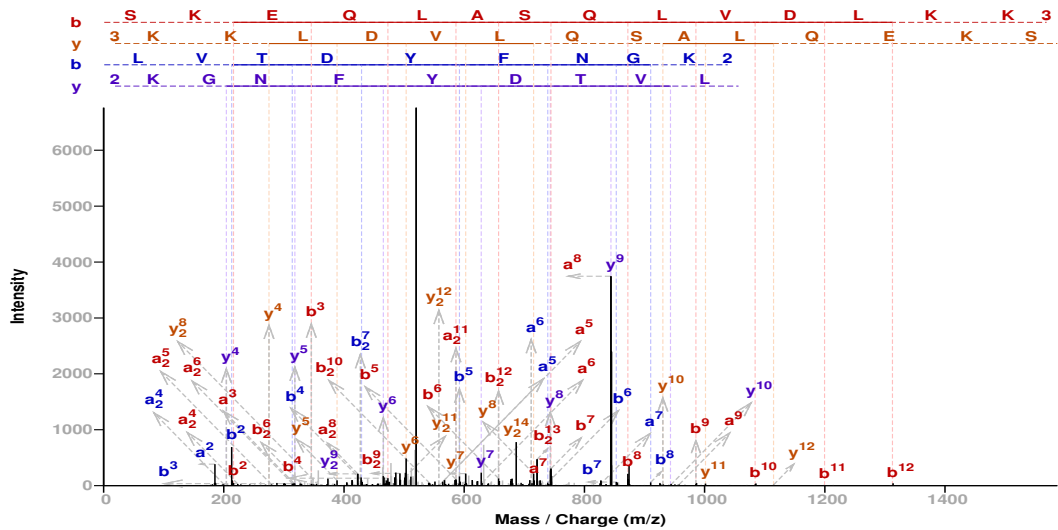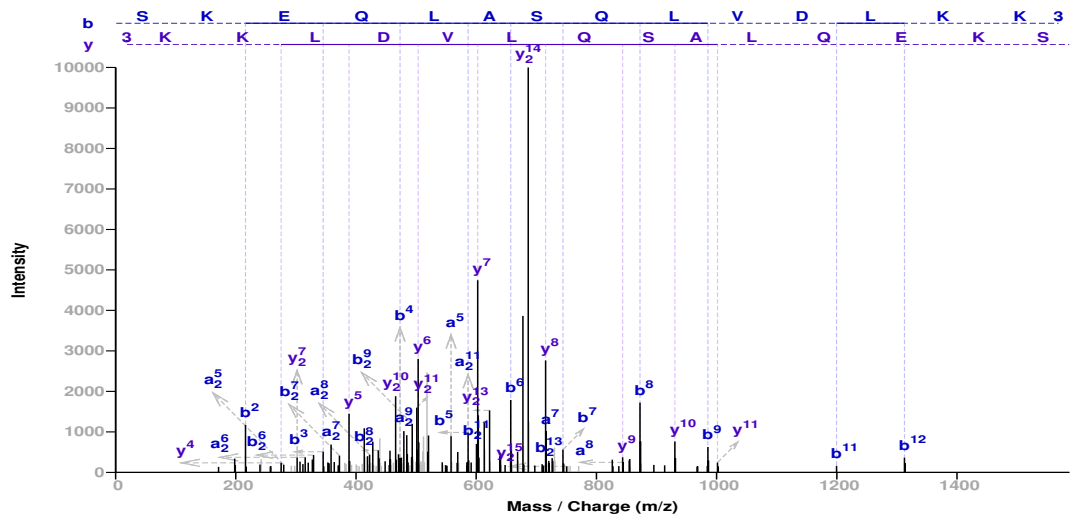



yeast3.Scan\_Number\_5124 Precursor m/z: 501.299 cosine: 0.913  $\alpha$ : 0.138

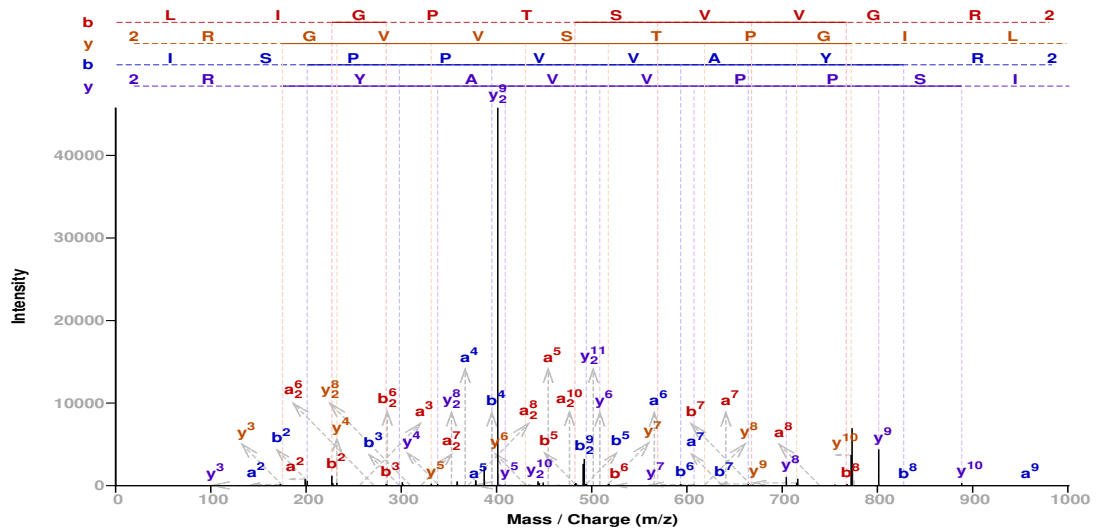

yeast4.Scan\_Number.4479 Precursor m/z: 462.578 cosine: 0.866  $\alpha$ : 0.999

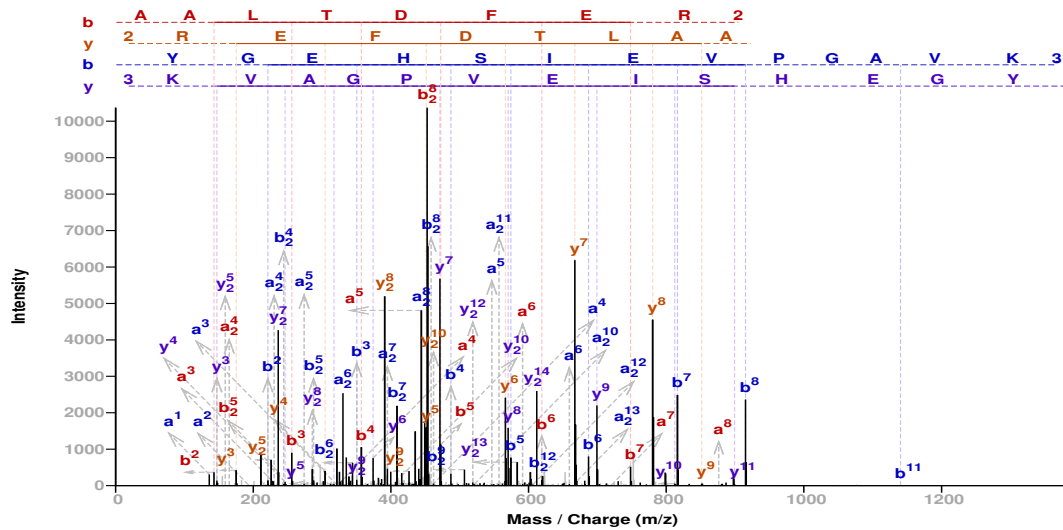

yeast4\_Scan\_Number\_2586 Precursor m/z: 505.252 cosine: 0.849  $\alpha$ : 0.992

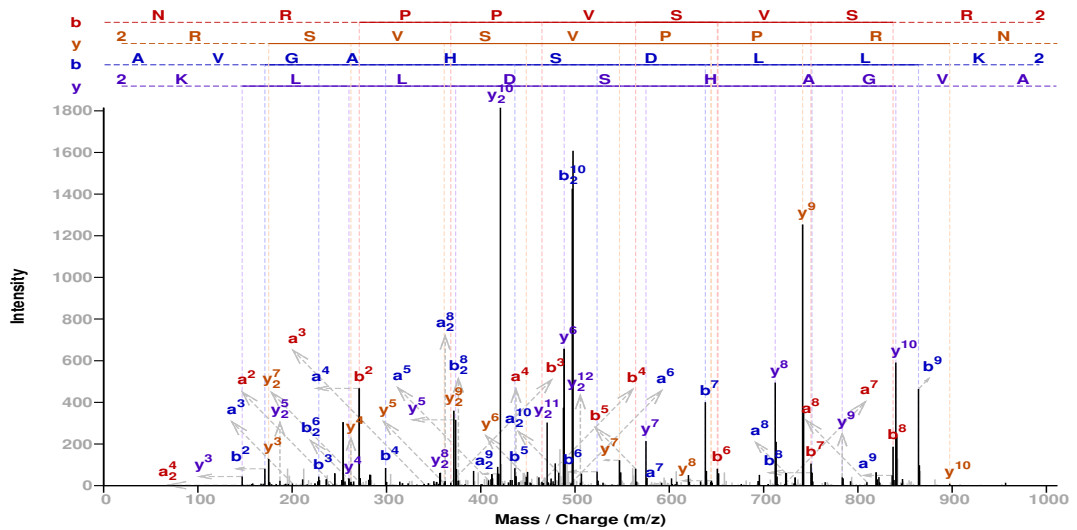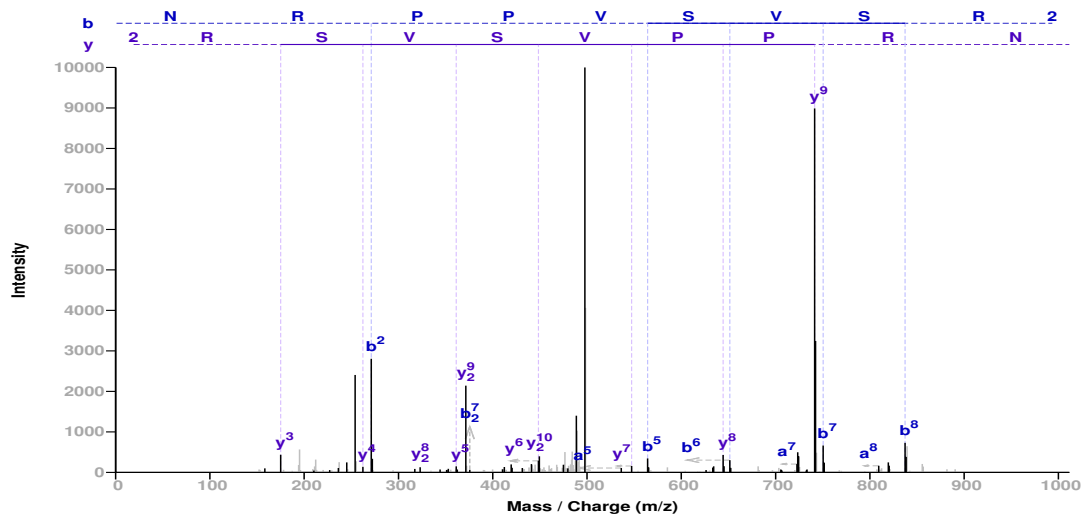

yeast4.Scan\_Number\_4573 Precursor m/z: 452.579 cosine: 0.816  $\alpha$ : 0.964

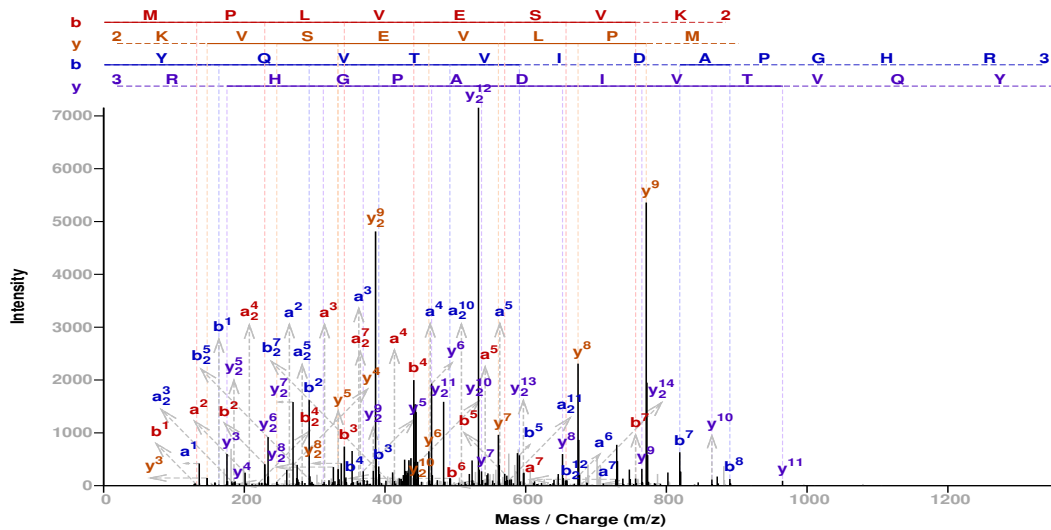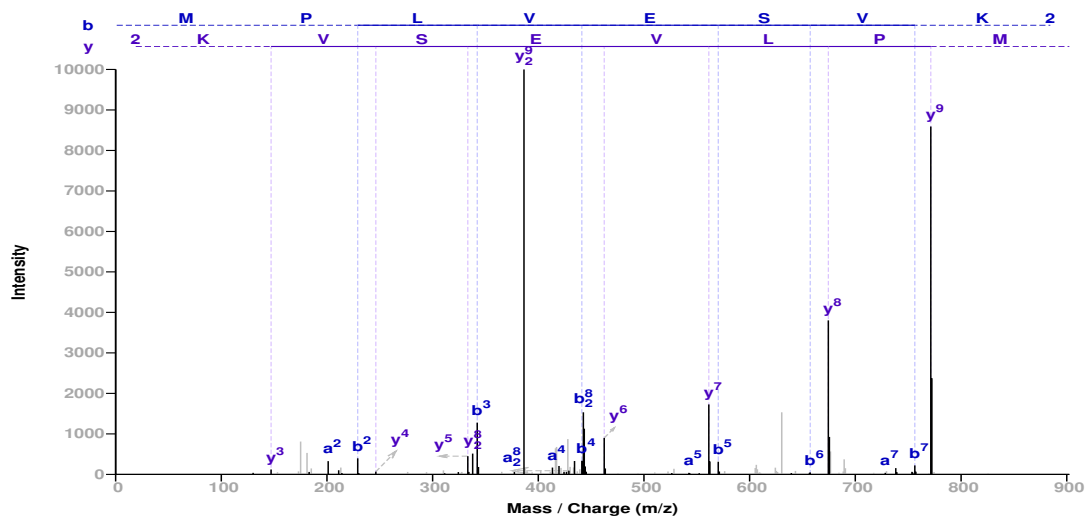



yeast4\_Scan\_Number\_3179 Precursor m/z: 349.238 cosine: 0.767  $\alpha$ : 0.958

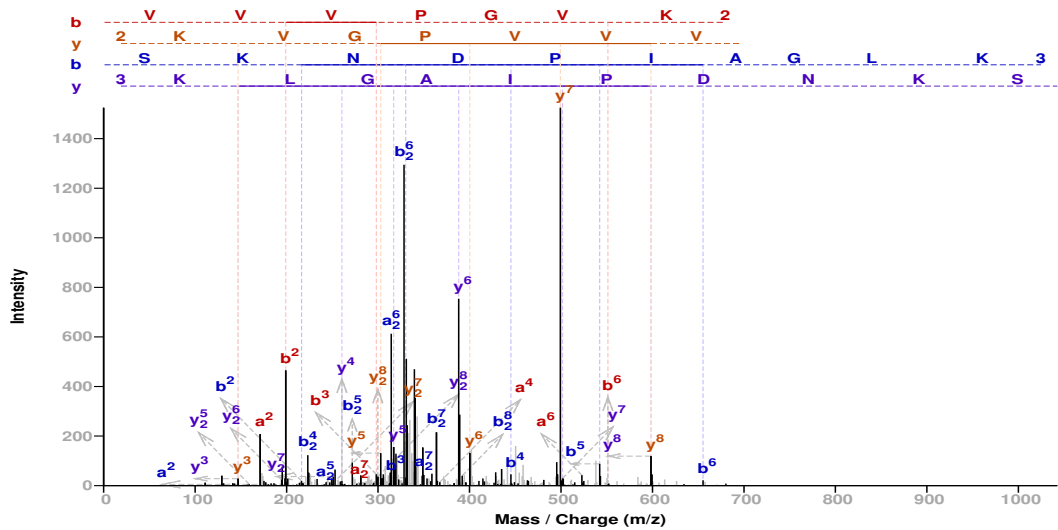

yeast4\_Scan\_Number\_1959 Precursor m/z: 471.570 cosine: 0.836  $\alpha$ : 0.952

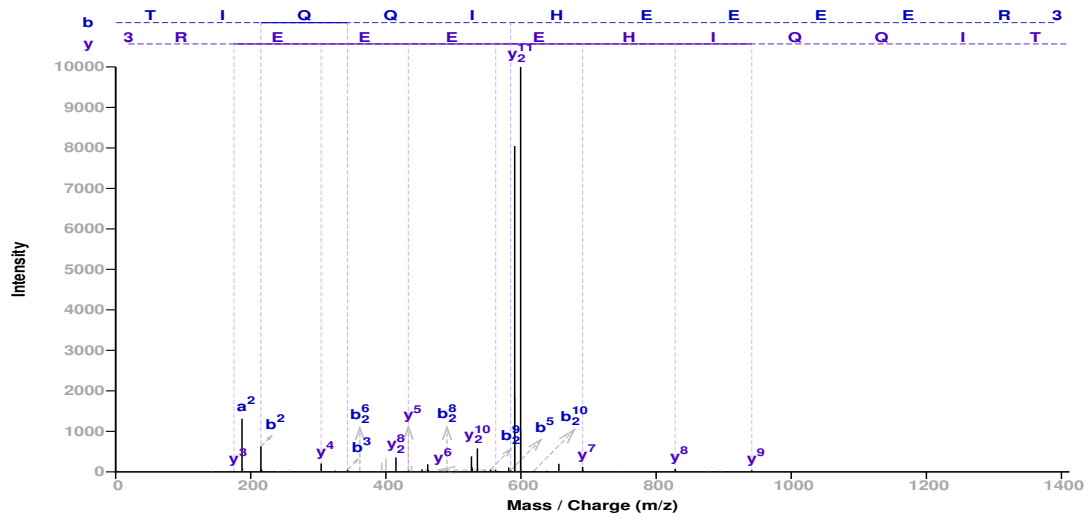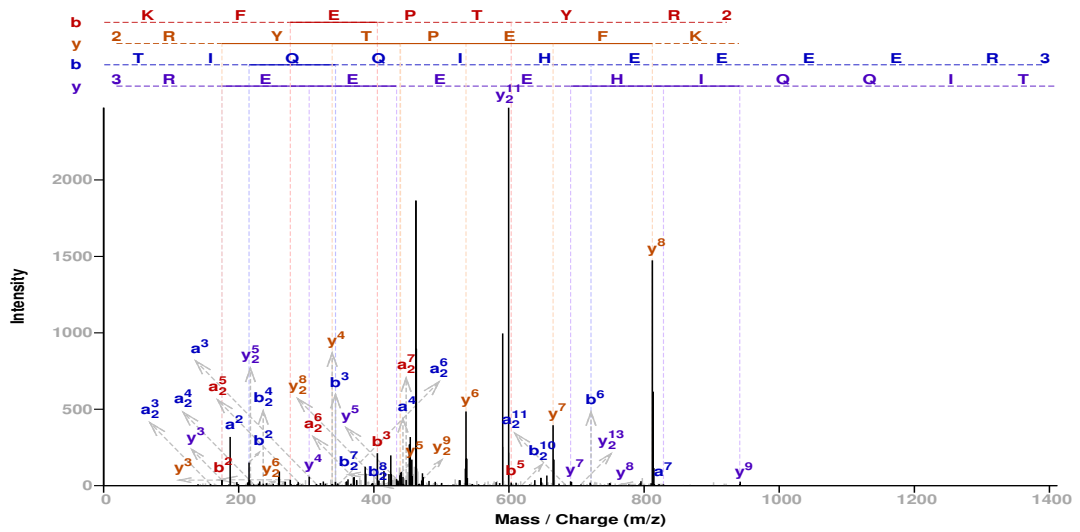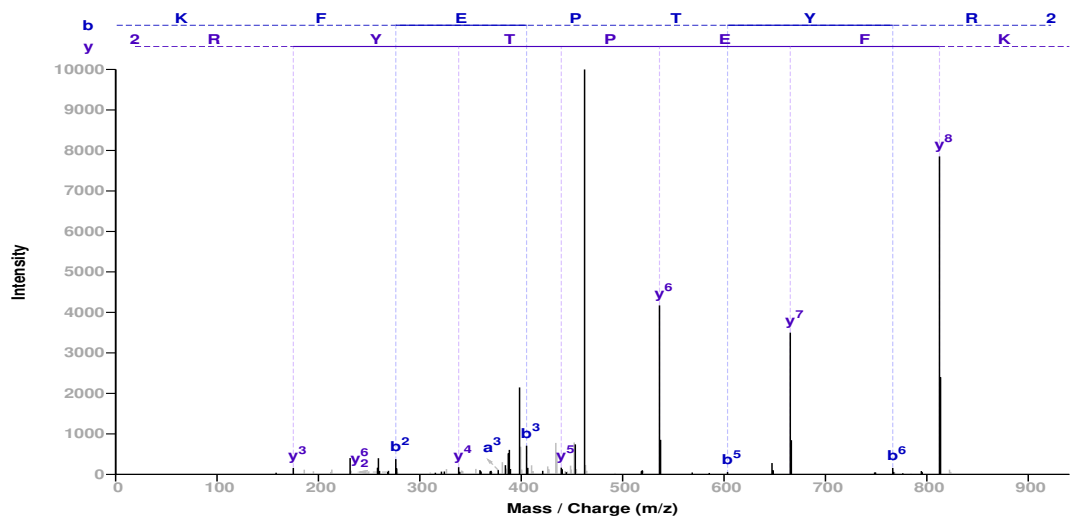

yeast4.Scan\_Number\_4100 Precursor m/z: 540.775 cosine: 0.759  $\alpha$ : 0.951

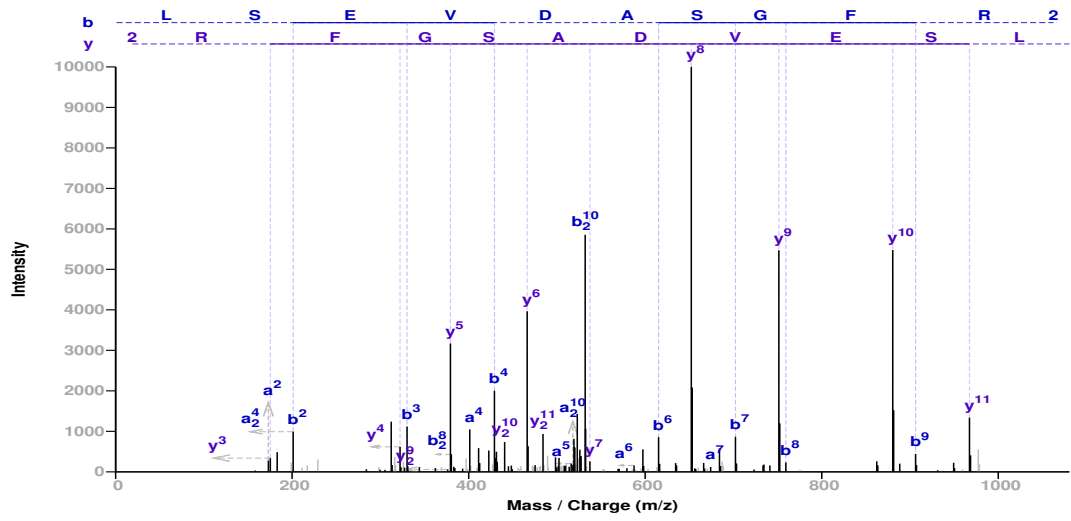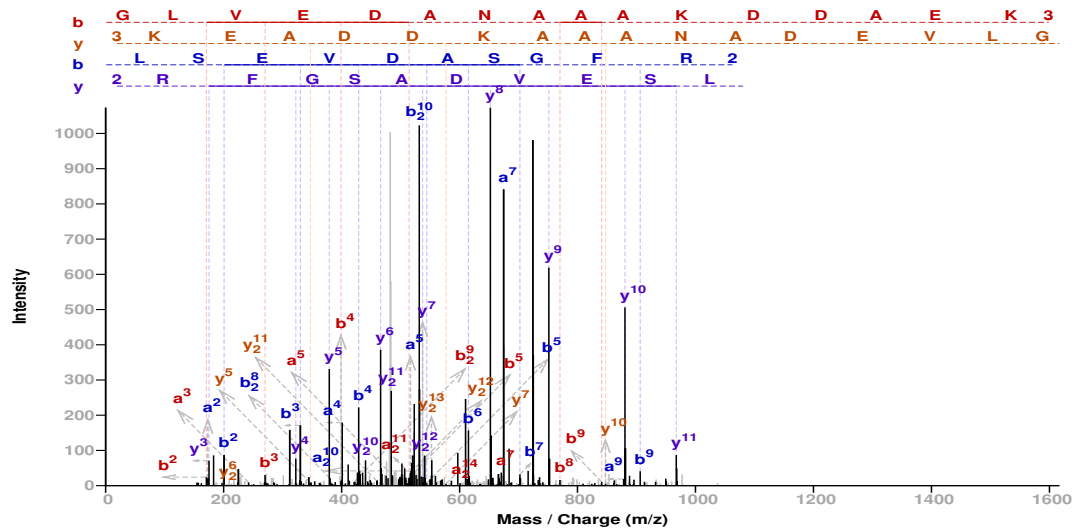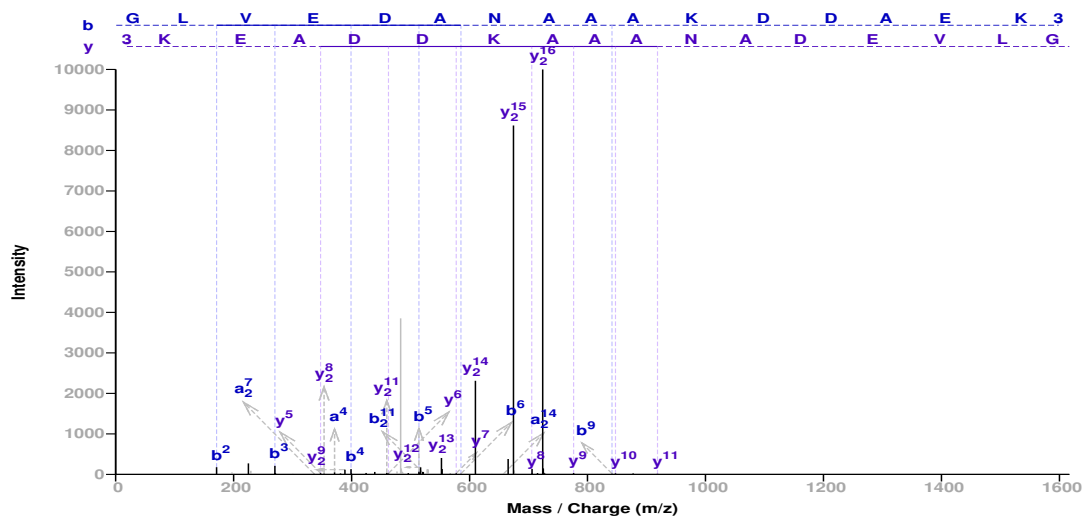

yeast4\_Scan\_Number\_2758 Precursor m/z: 501.800 cosine: 0.740  $\alpha$ : 0.927

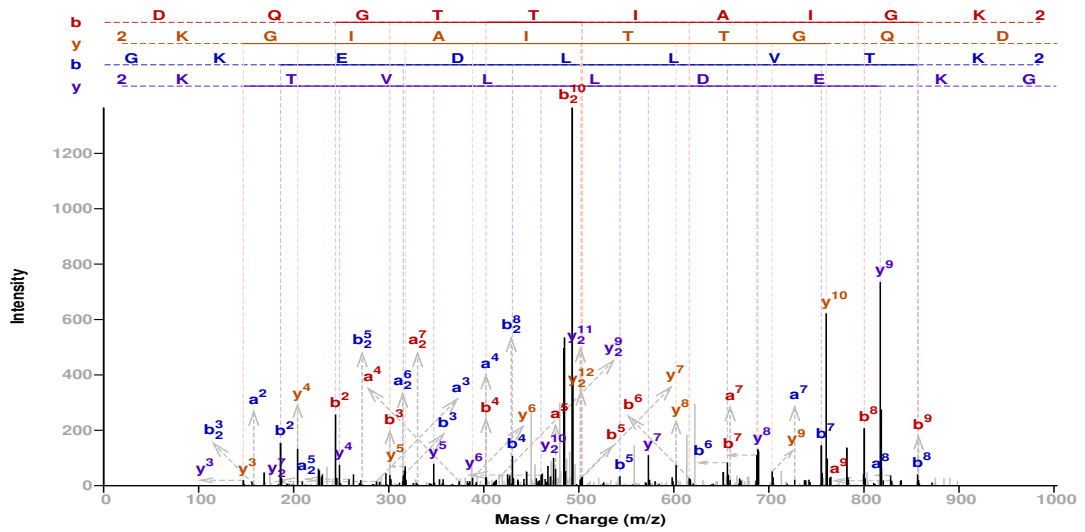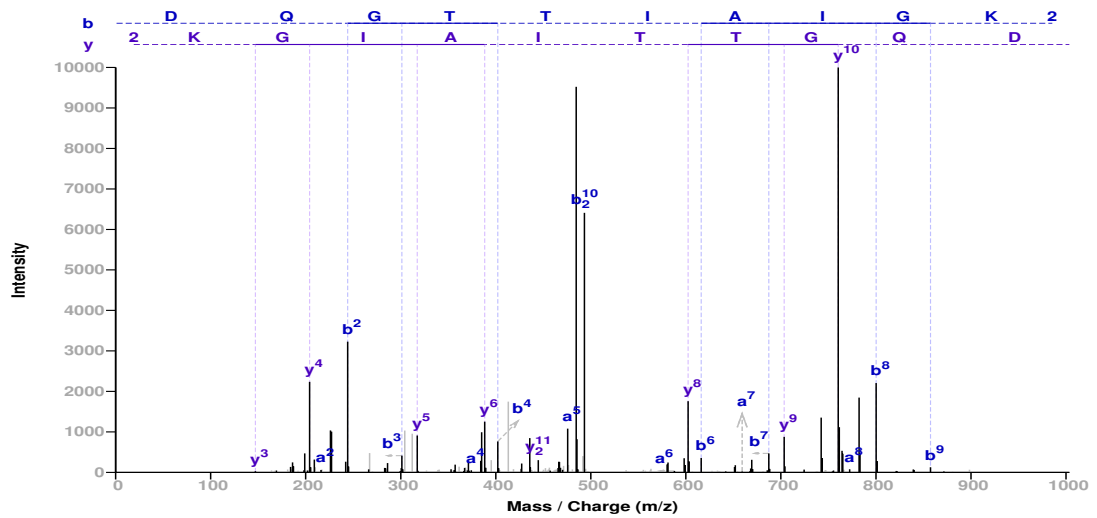

yeast4\_Scan\_Number\_7238 Precursor m/z: 593.339 cosine: 0.897  $\alpha$ : 0.919

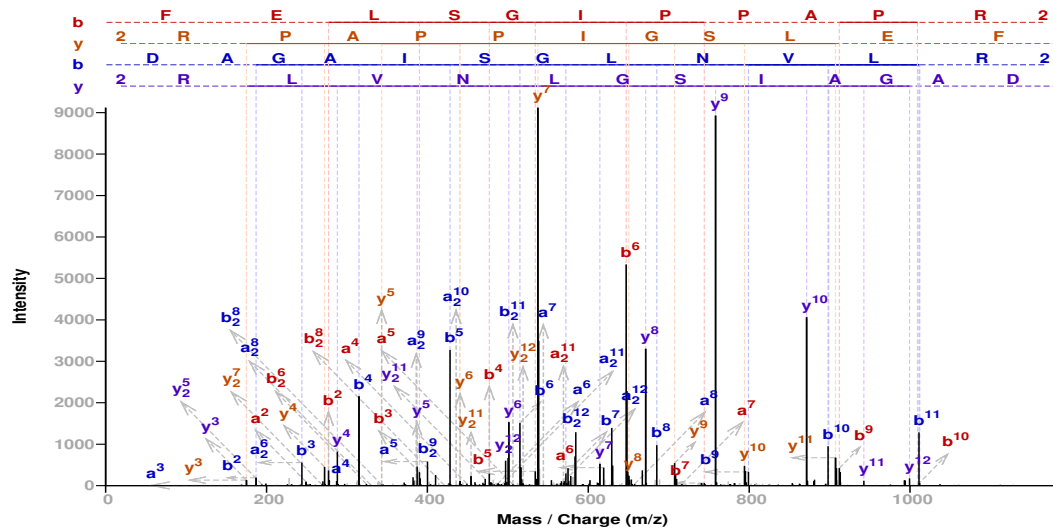

yeast4\_Scan\_Number\_3139 Precursor m/z: 343.238 cosine: 0.851  $\alpha$ : 0.896

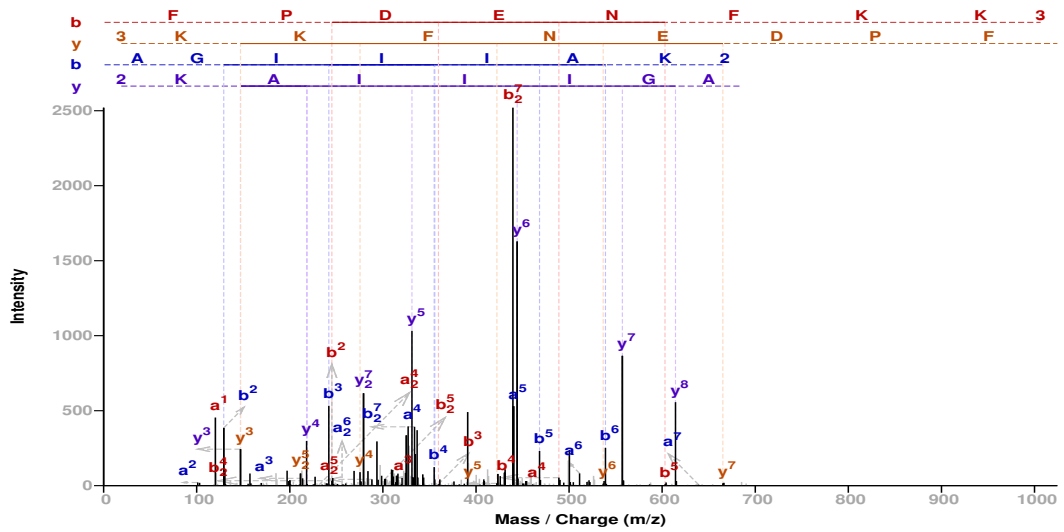

yeast4.Scan\_Number\_5619 Precursor m/z: 582.310 cosine: 0.763  $\alpha$ : 0.895

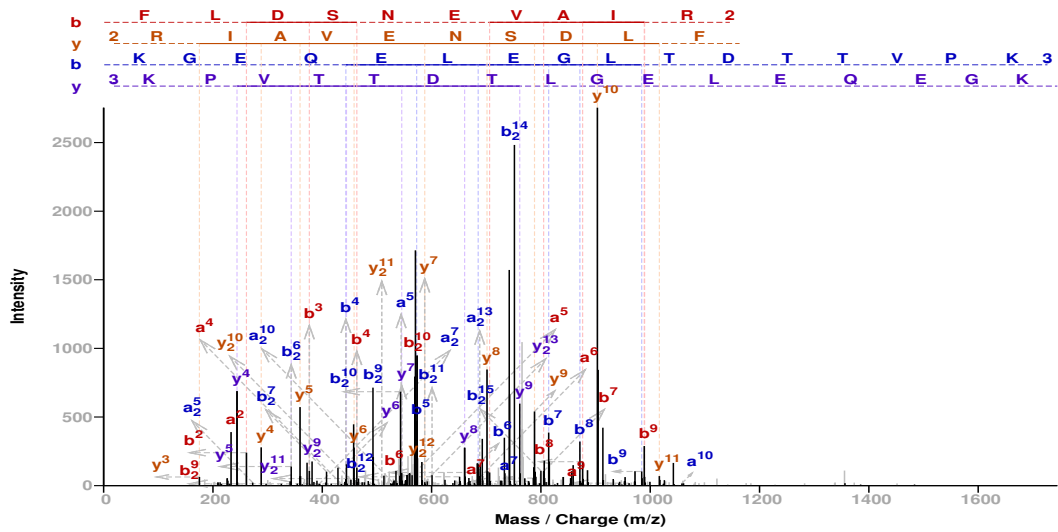

yeast4\_Scan\_Number\_558 Precursor m/z: 474.722 cosine: 0.863  $\alpha$ : 0.887

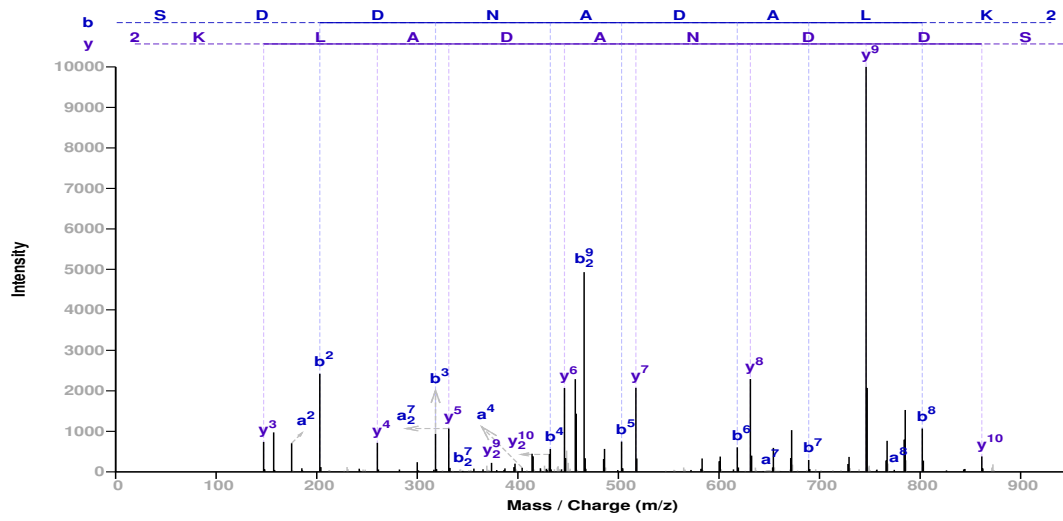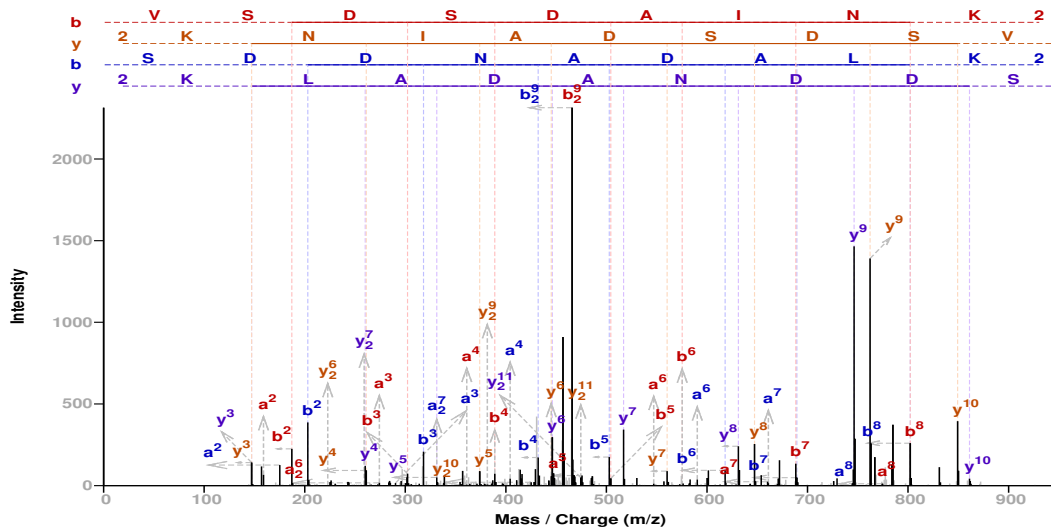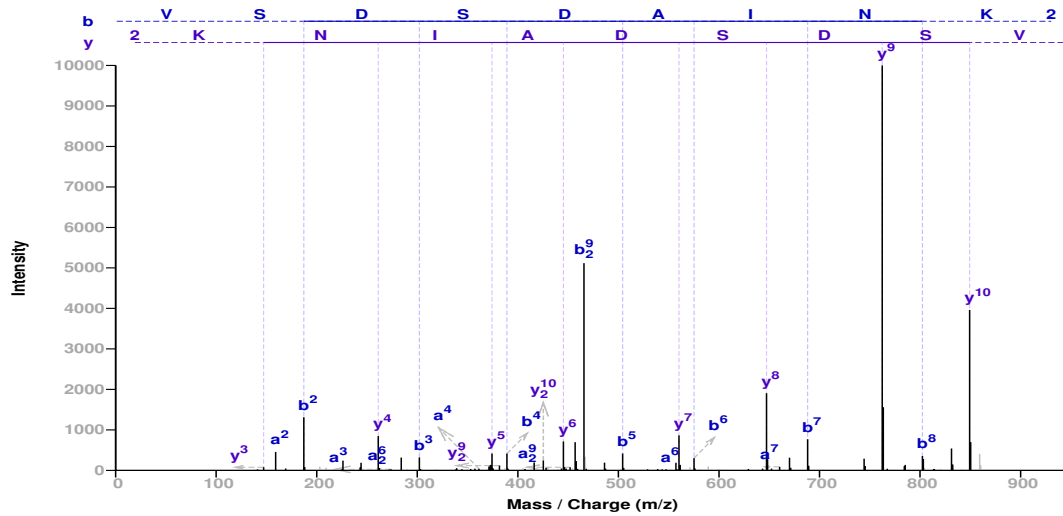



yeast4\_Scan\_Number\_4335 Precursor m/z: 633.831 cosine: 0.775  $\alpha$ : 0.870

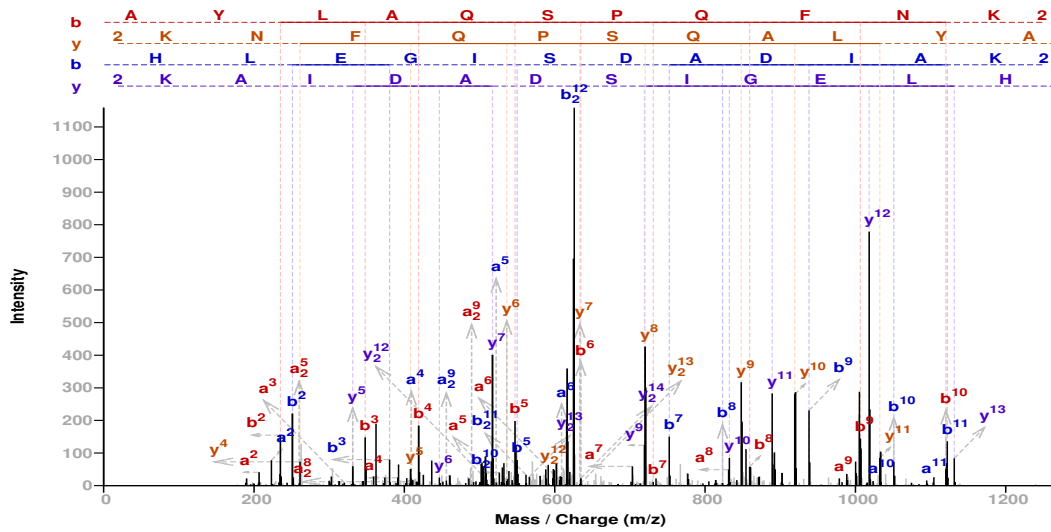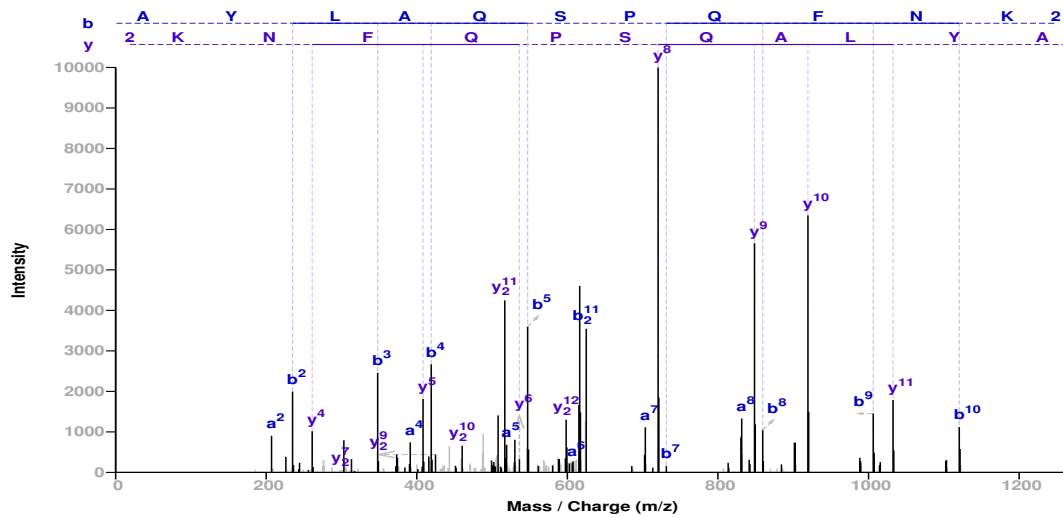

yeast4\_Scan\_Number\_4205 Precursor m/z: 439.248 cosine: 0.797  $\alpha$ : 0.854

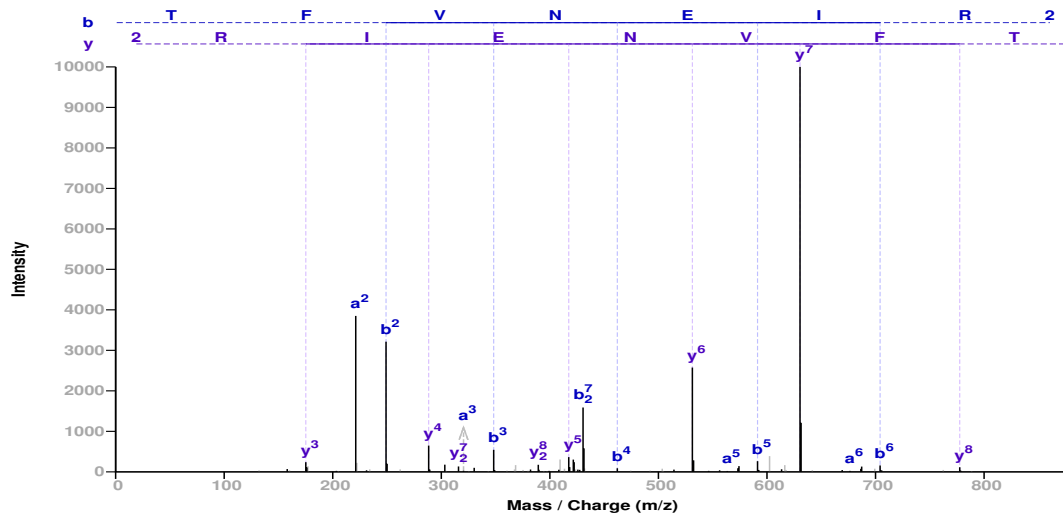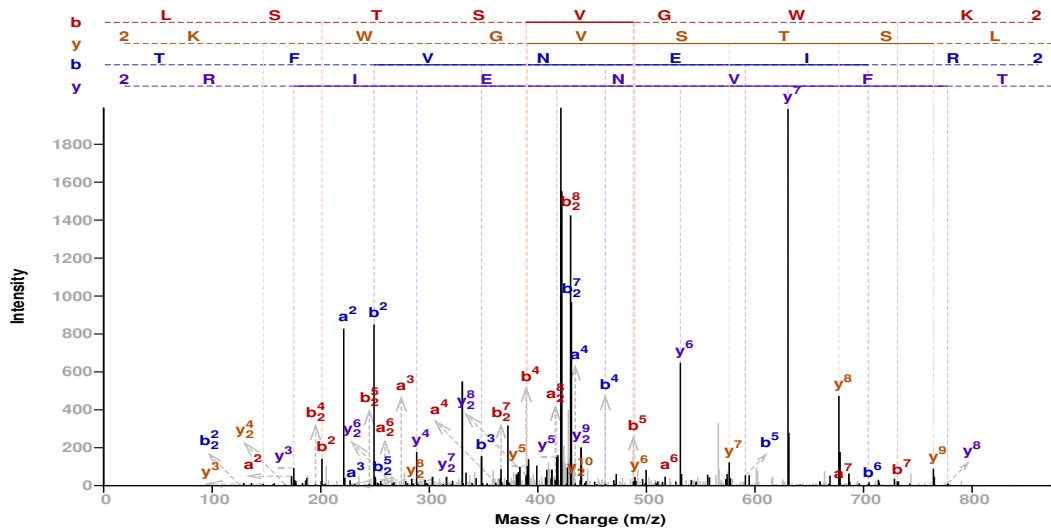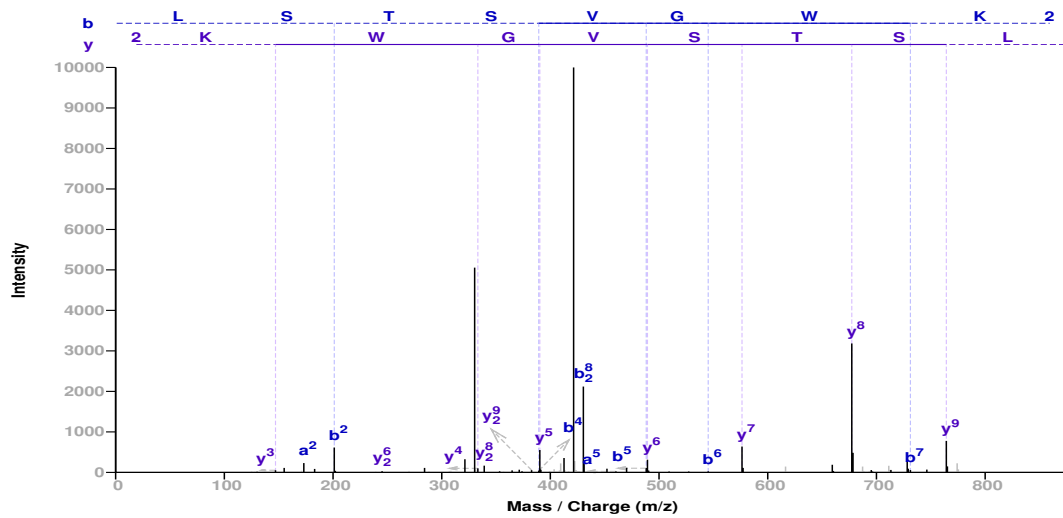



yeast4\_Scan\_Number\_2224 Precursor m/z: 474.260 cosine: 0.768  $\alpha$ : 0.816

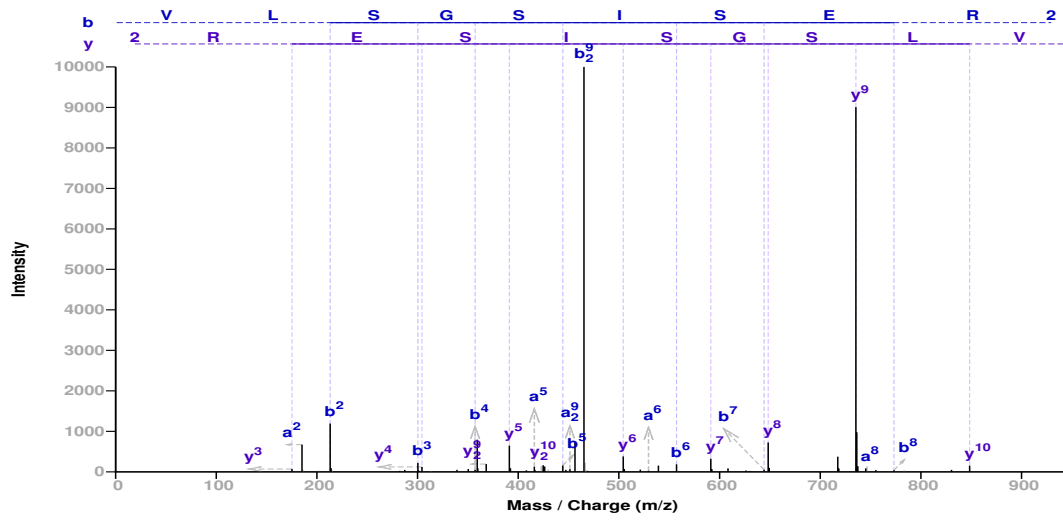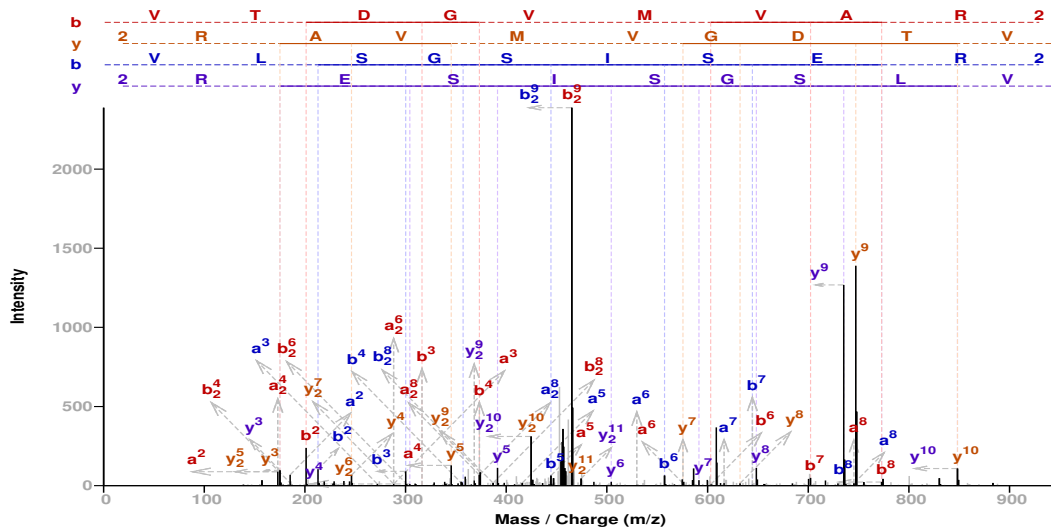

yeast4.Scan\_Number.2759 Precursor m/z: 432.755 cosine: 0.755  $\alpha$ : 0.811

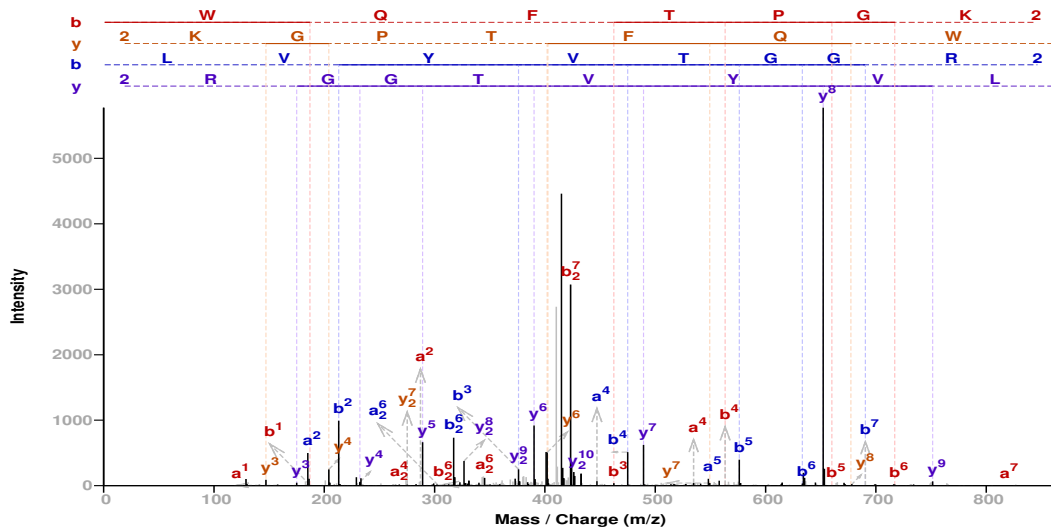



yeast4\_Scan\_Number\_4163 Precursor m/z: 444.762 cosine: 0.891  $\alpha$ : 0.801

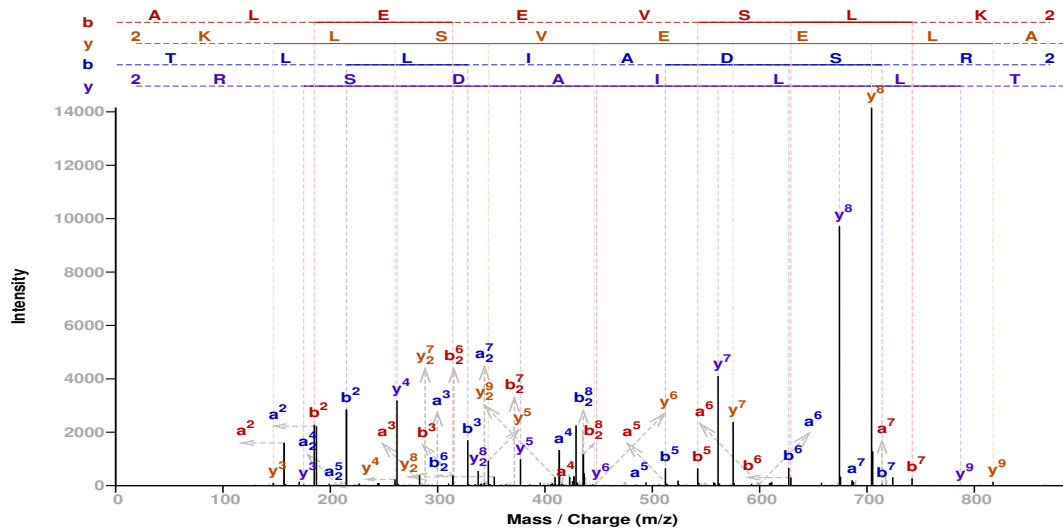

yeast4\_Scan\_Number\_9863 Precursor m/z: 789.916 cosine: 0.808  $\alpha$ : 0.797

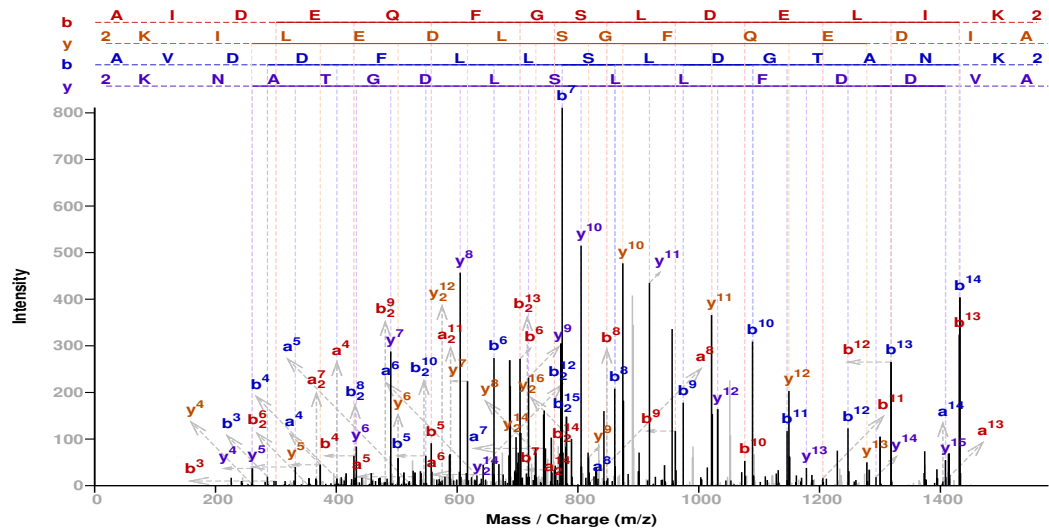



yeast4\_Scan\_Number\_2687 Precursor m/z: 565.936 cosine: 0.749  $\alpha$ : 0.766

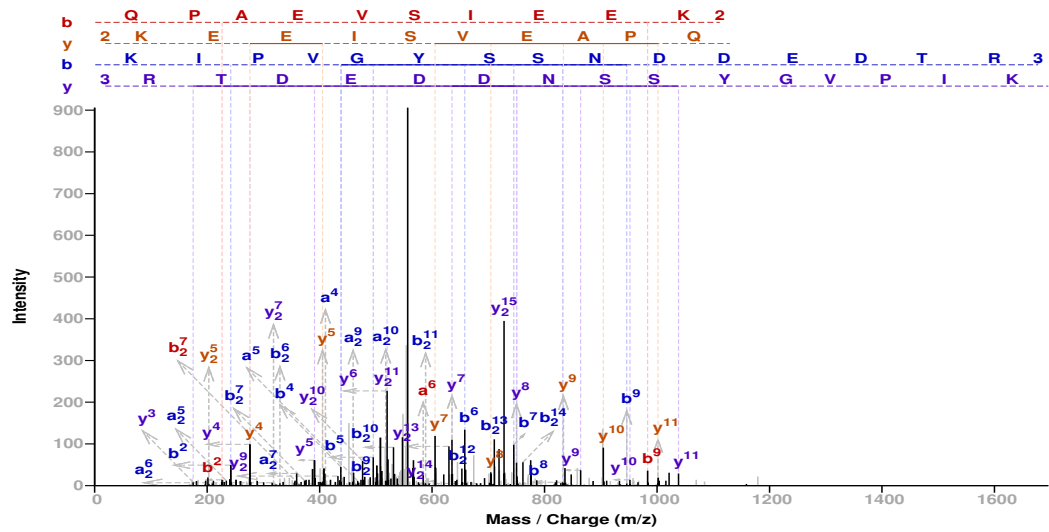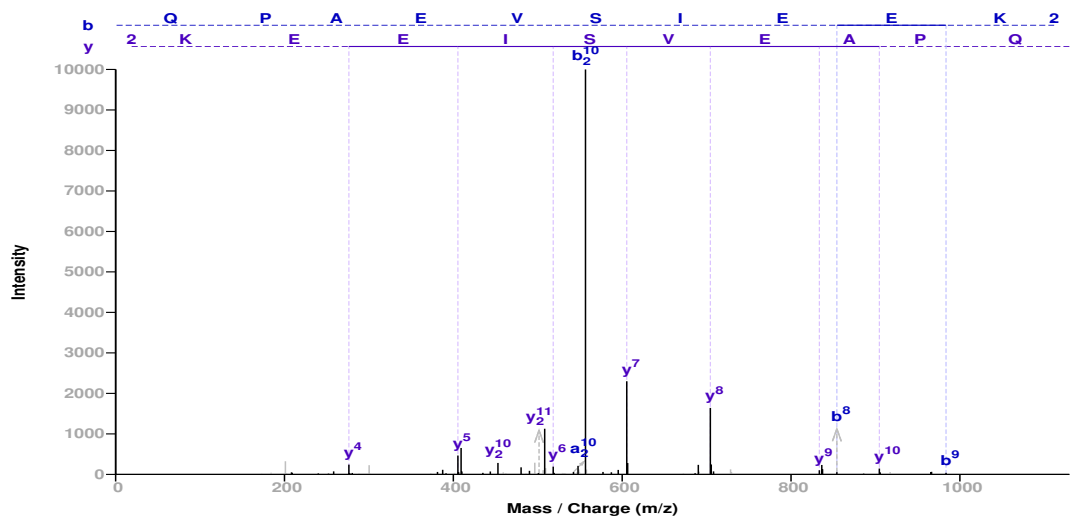

yeast4\_Scan\_Number\_6525 Precursor m/z: 730.875 cosine: 0.884  $\alpha$ : 0.765

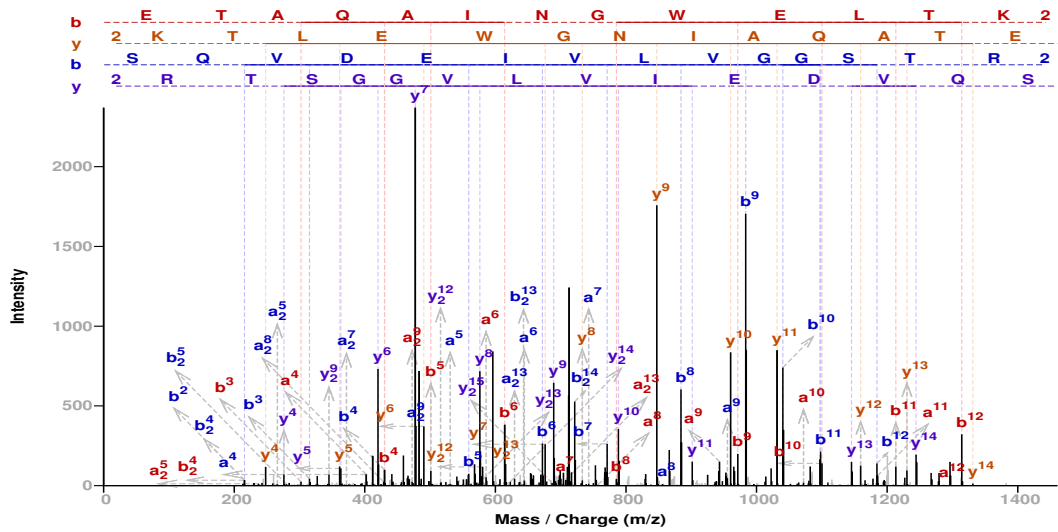



yeast4\_Scan\_Number\_1895 Precursor m/z: 742.840 cosine: 0.747  $\alpha$ : 0.758

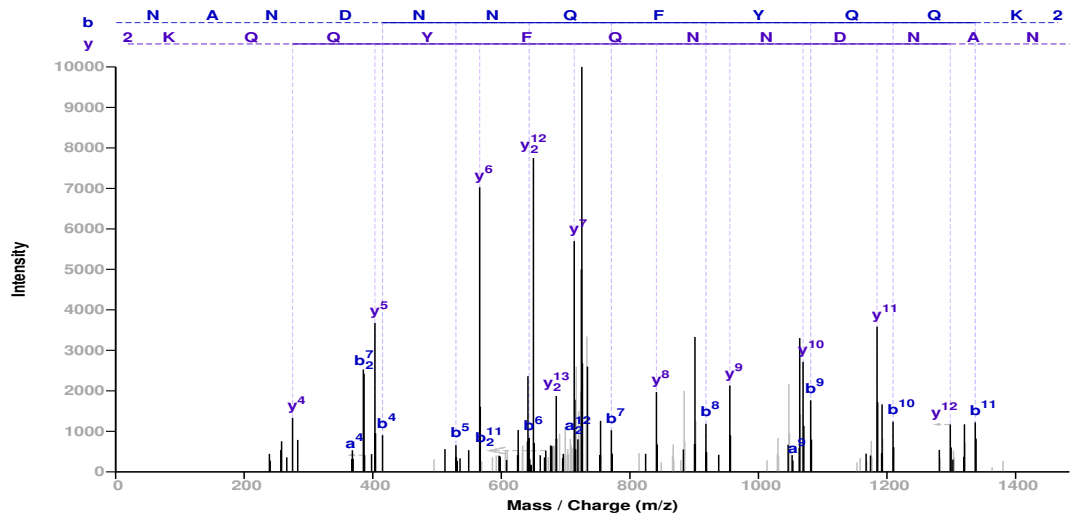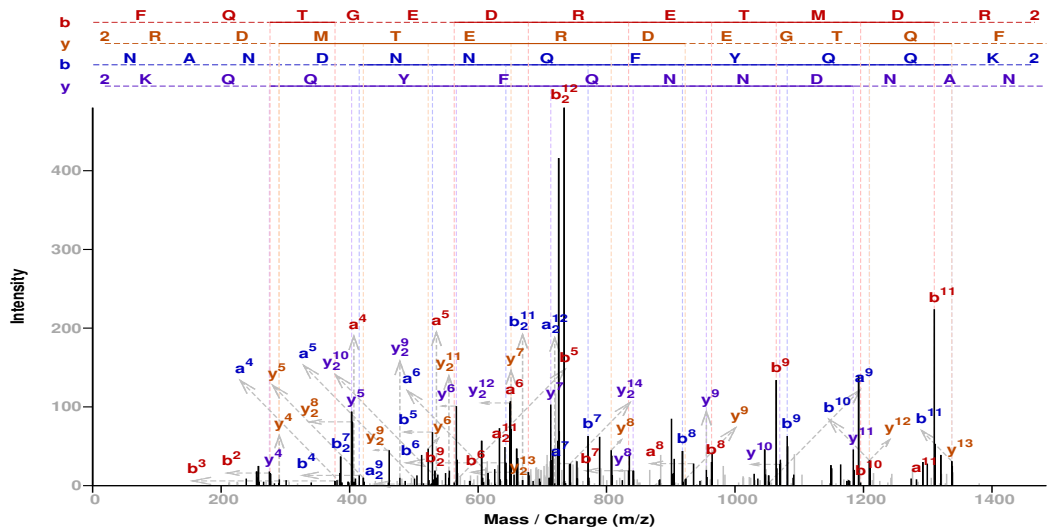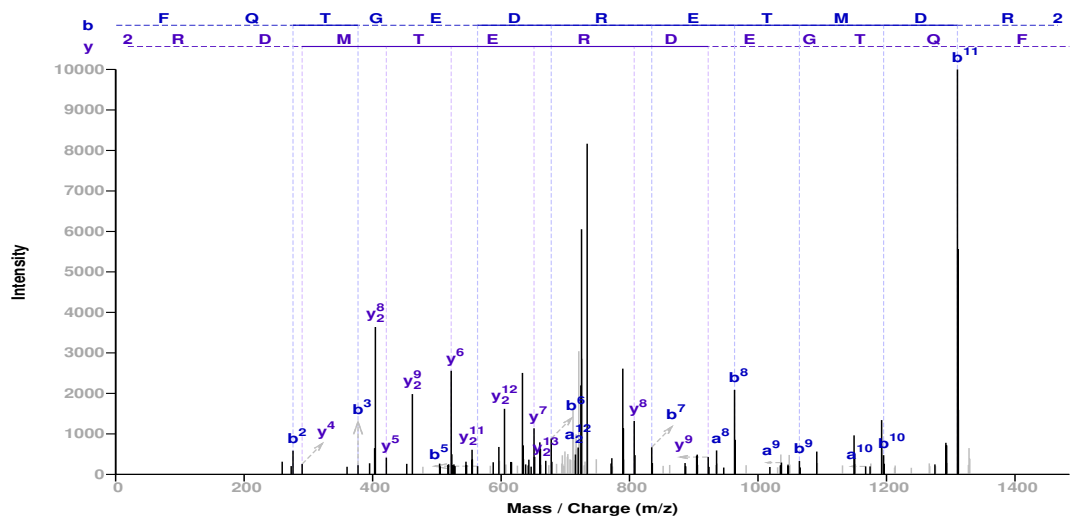

yeast4.Scan\_Number\_4563 Precursor m/z: 404.239 cosine: 0.779  $\alpha$ : 0.754

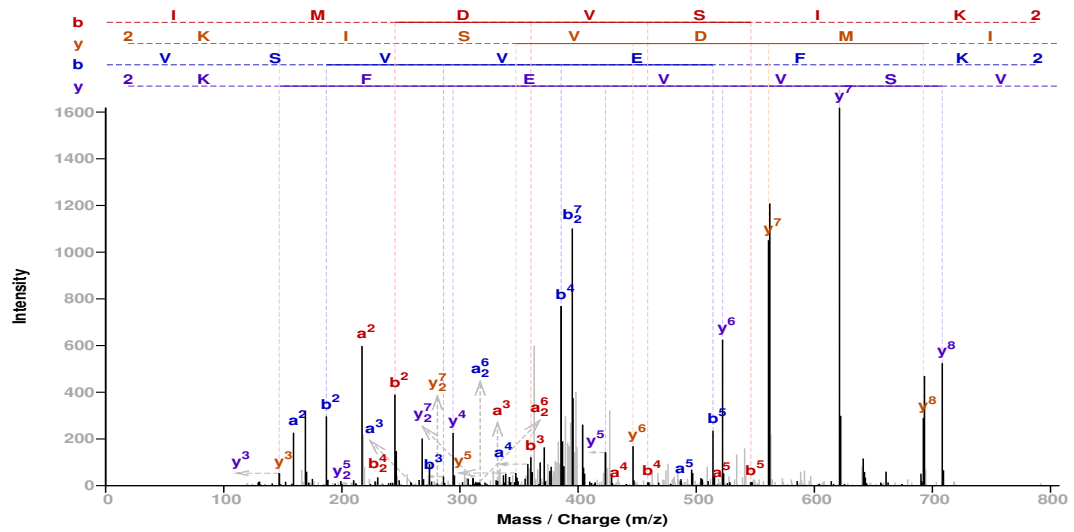

yeast4\_Scan\_Number\_5203 Precursor m/z: 411.226 cosine: 0.777  $\alpha$ : 0.753

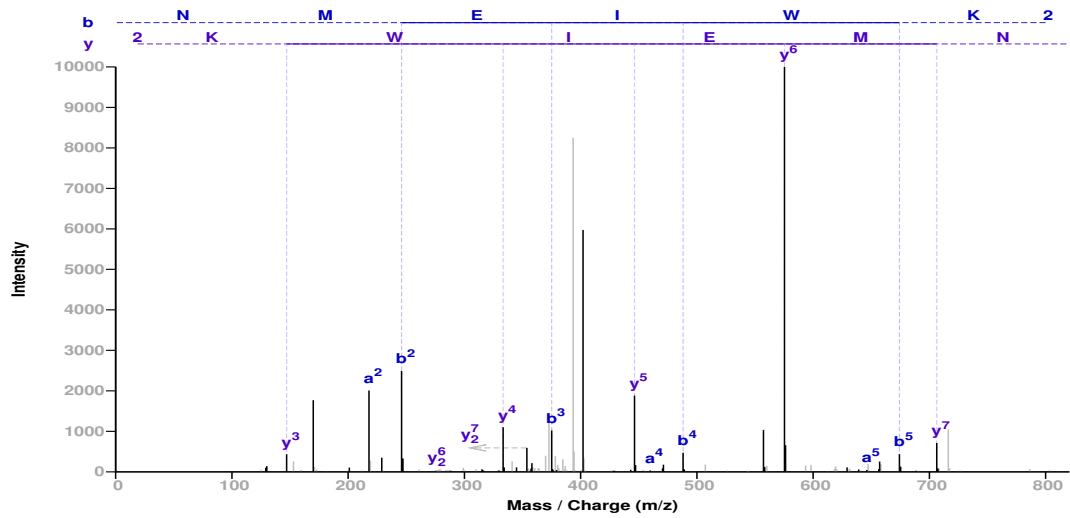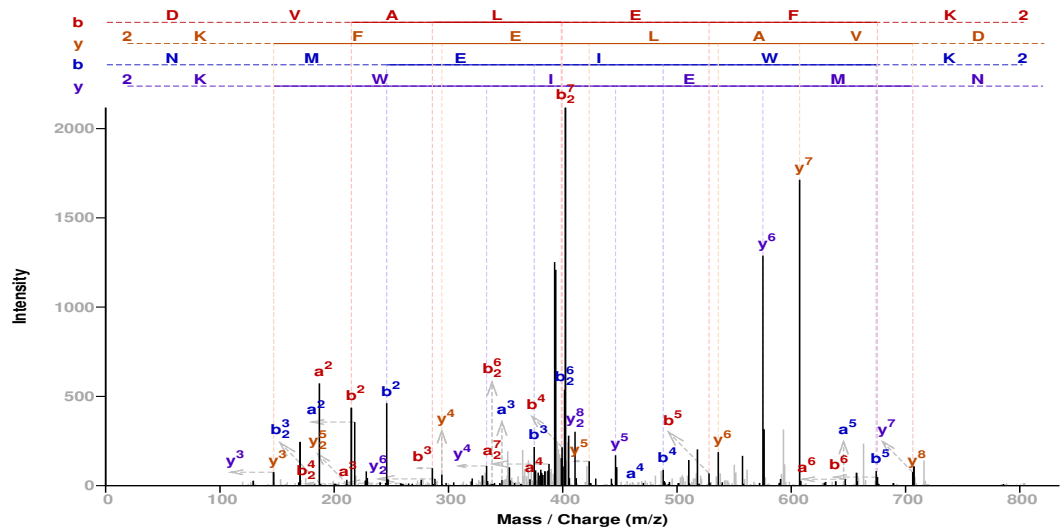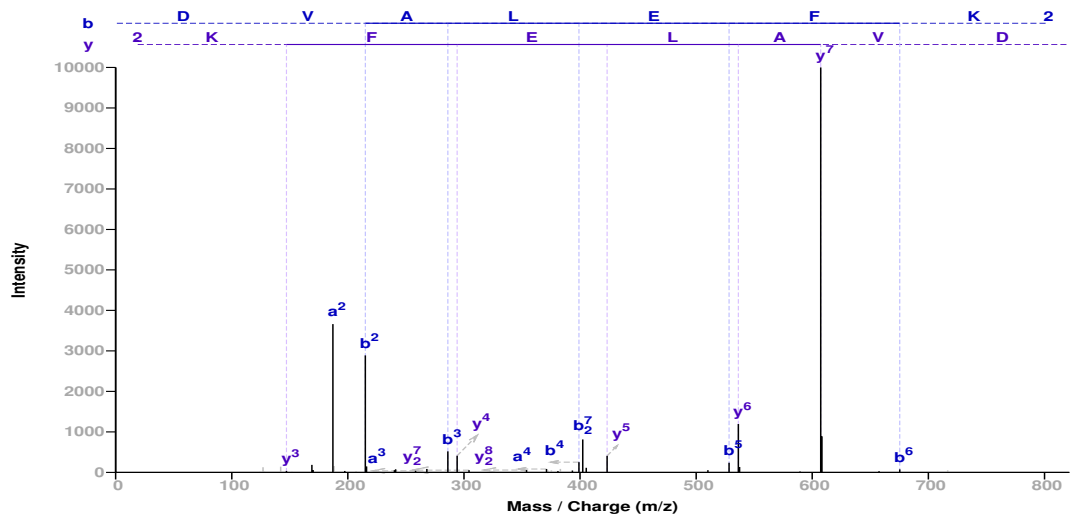

yeast4\_Scan\_Number\_5009 Precursor m/z: 593.333 cosine: 0.814  $\alpha$ : 0.744

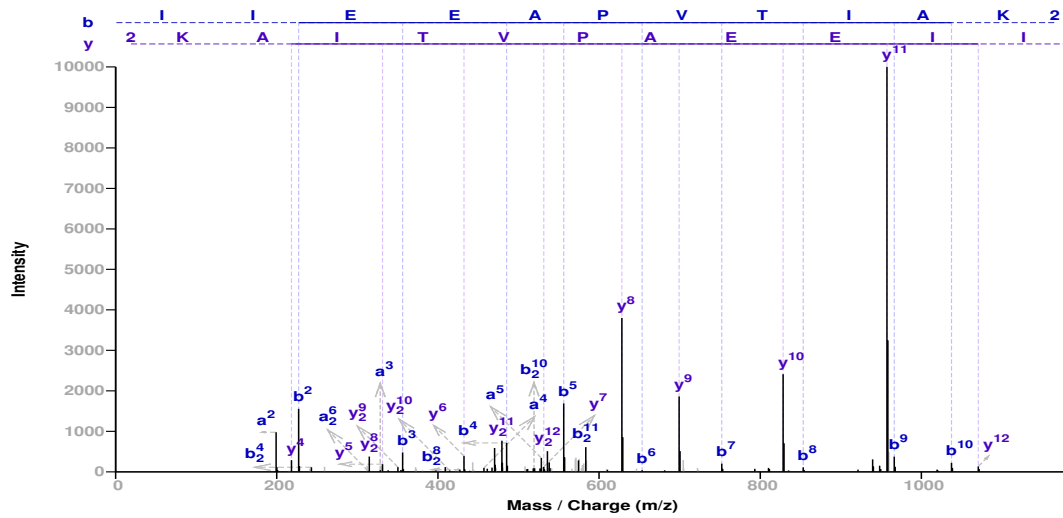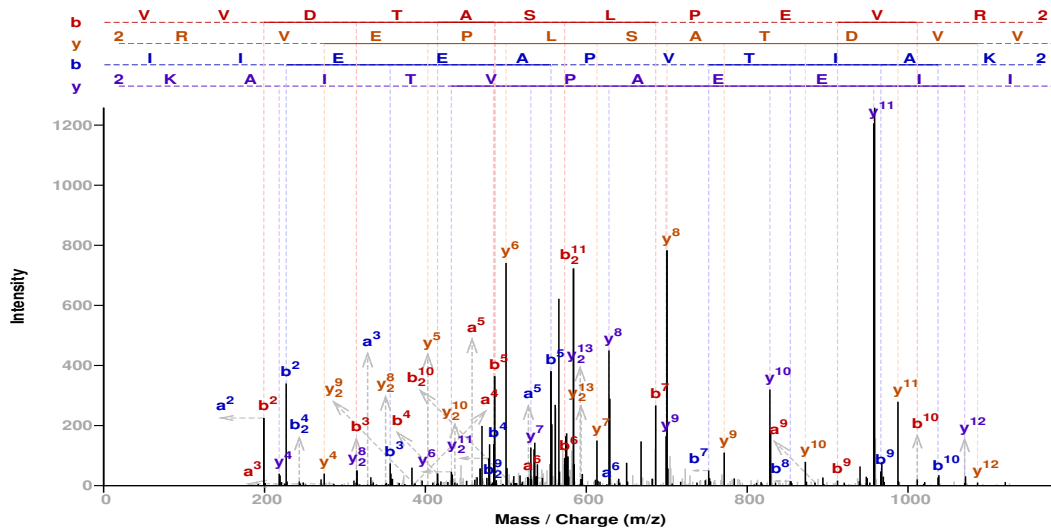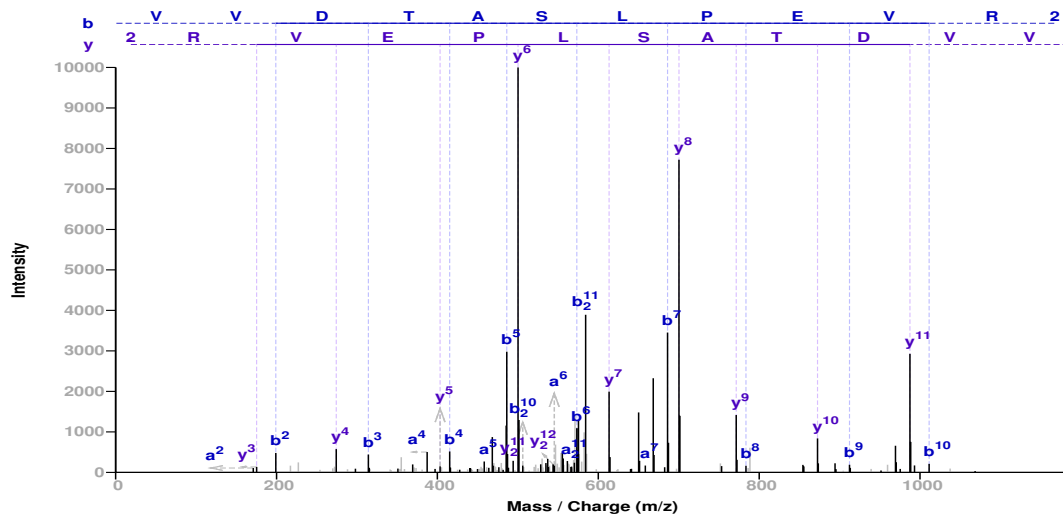

yeast4\_Scan\_Number\_4826 Precursor m/z: 478.271 cosine: 0.828  $\alpha$ : 0.739

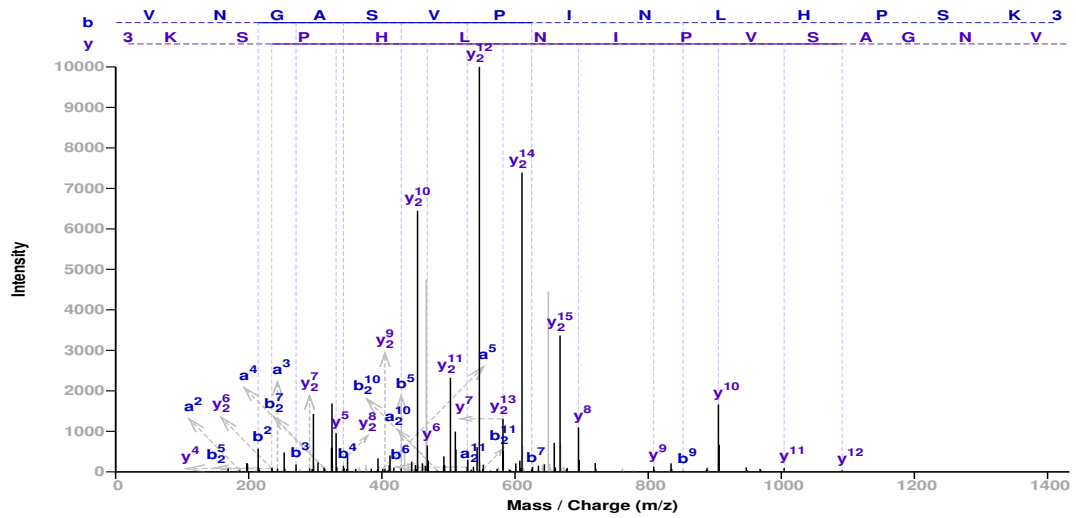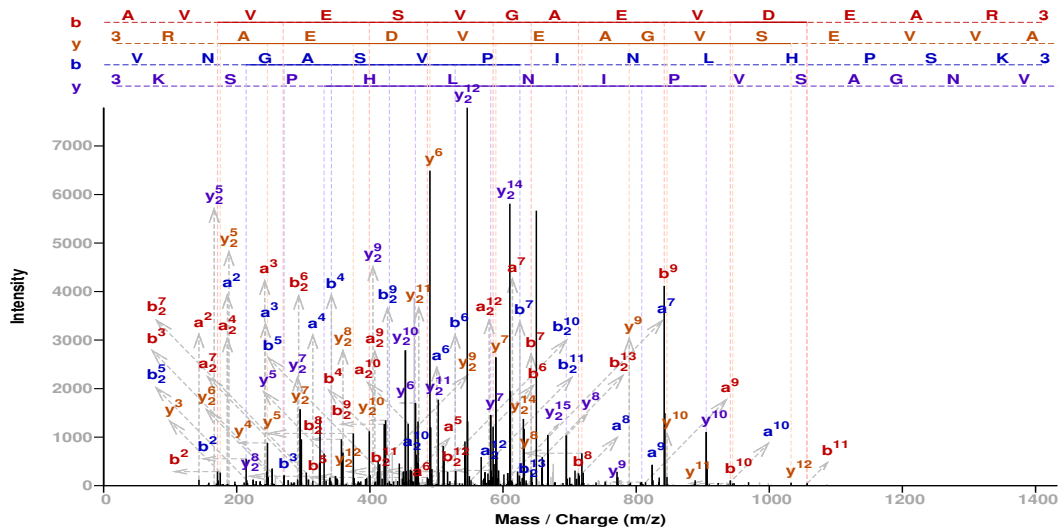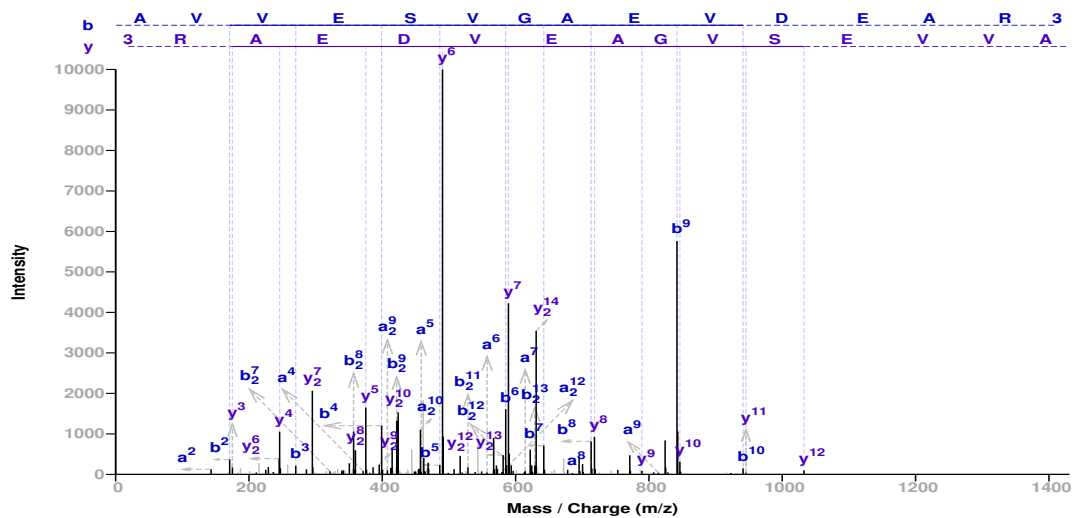



yeast4\_Scan\_Number\_3324 Precursor m/z: 556.812 cosine: 0.850  $\alpha$ : 0.717

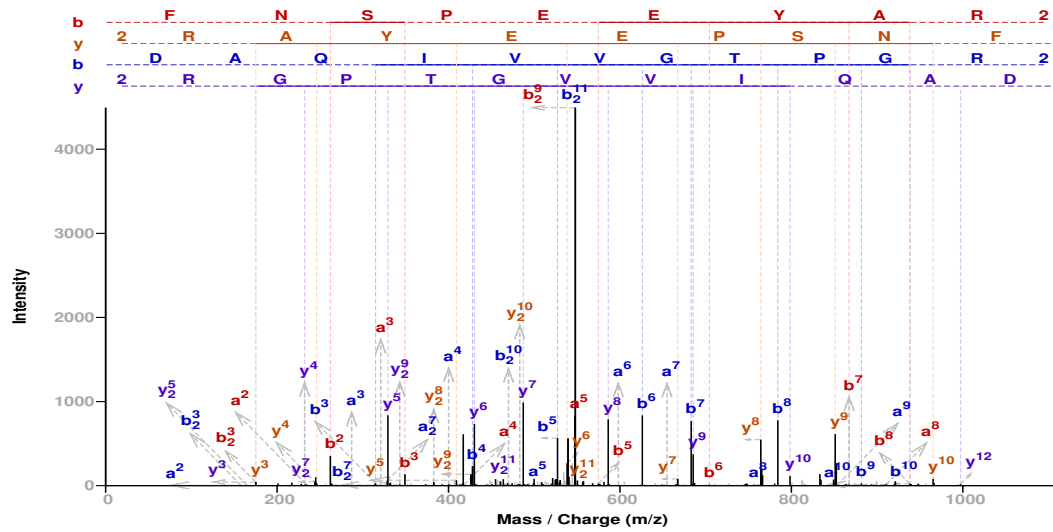

yeast4\_Scan\_Number\_7359 Precursor m/z: 813.464 cosine: 0.834  $\alpha$ : 0.715

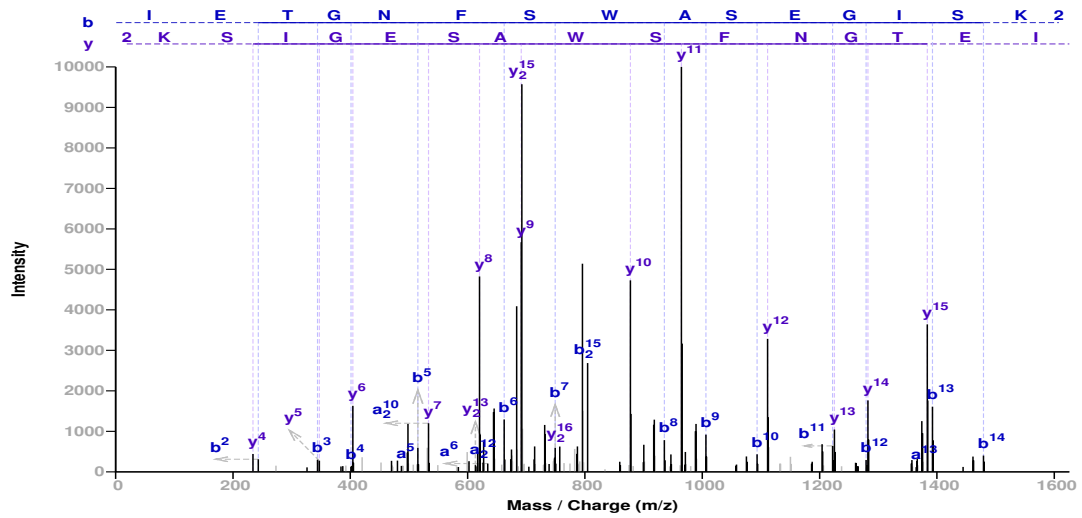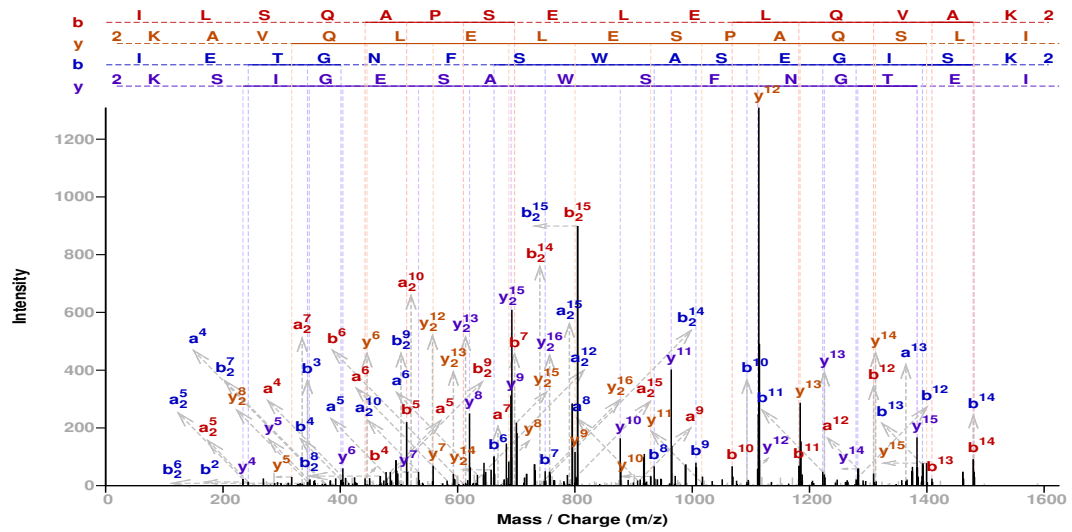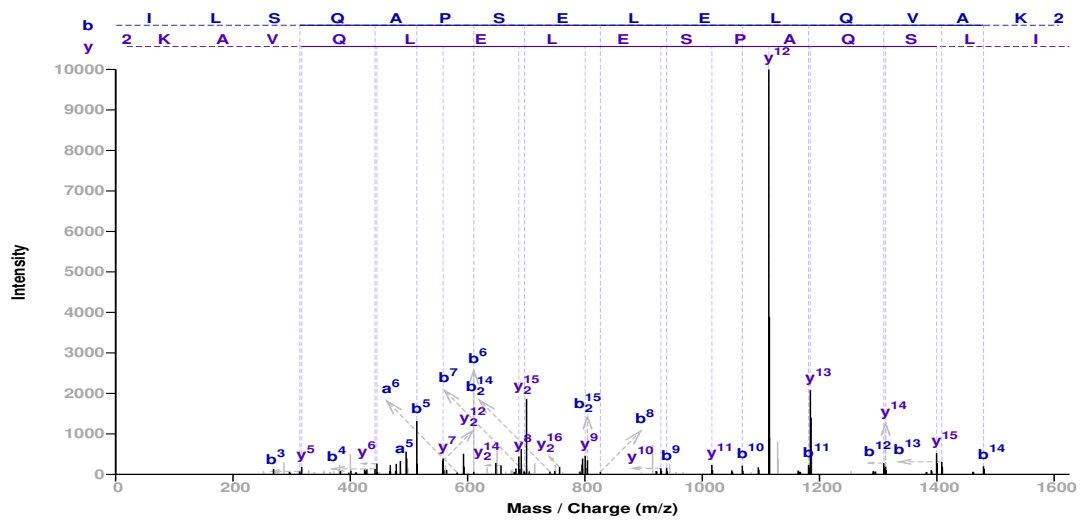

yeast4\_Scan\_Number\_4810 Precursor m/z: 596.312 cosine: 0.858  $\alpha$ : 0.708

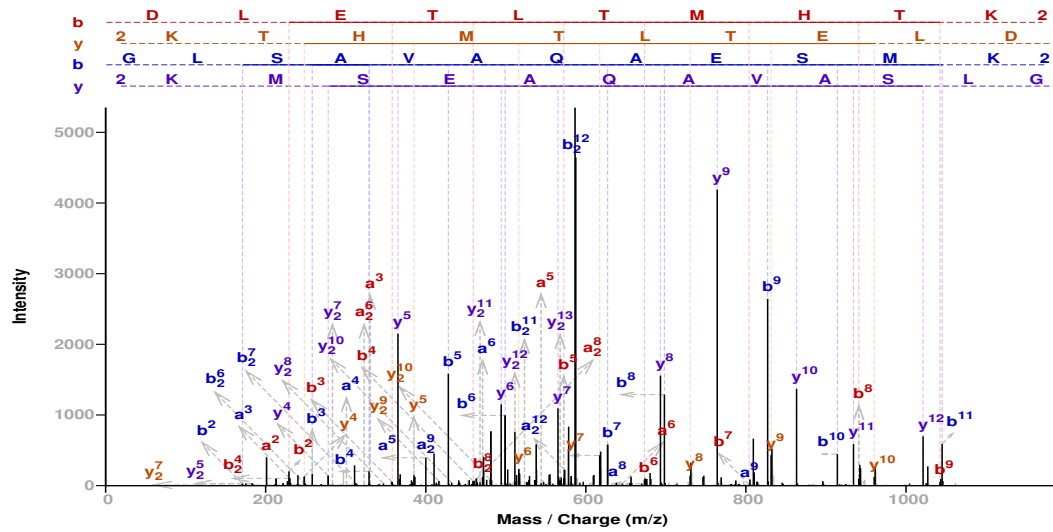

yeast4\_Scan\_Number\_5509 Precursor m/z: 562.340 cosine: 0.830  $\alpha$ : 0.701

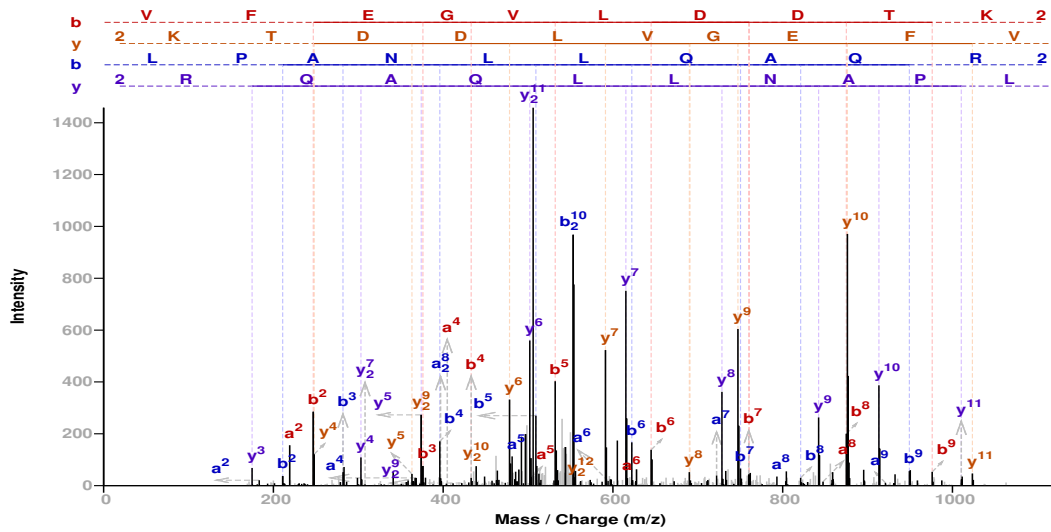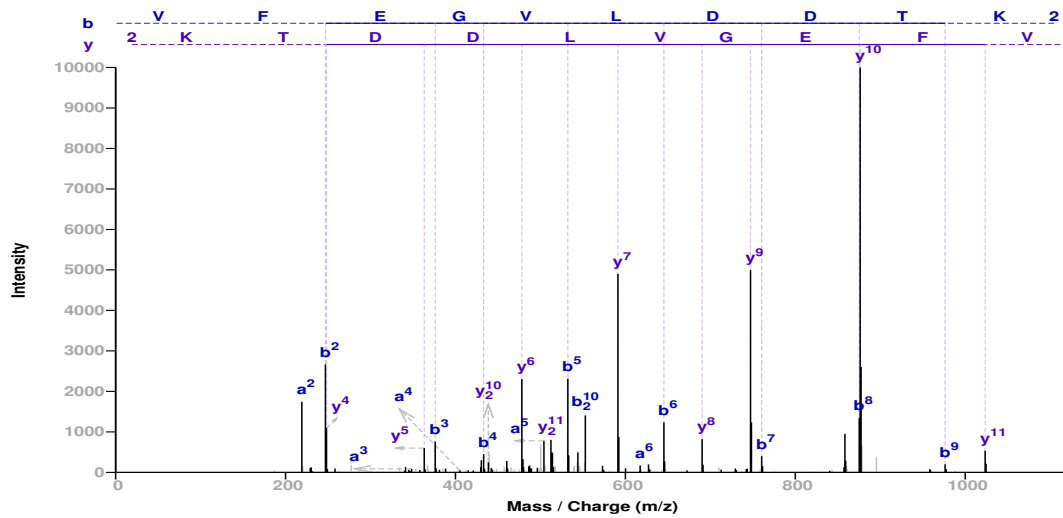

yeast4.Scan\_Number\_4651 Precursor m/z: 547.777 cosine: 0.722  $\alpha$ : 0.700

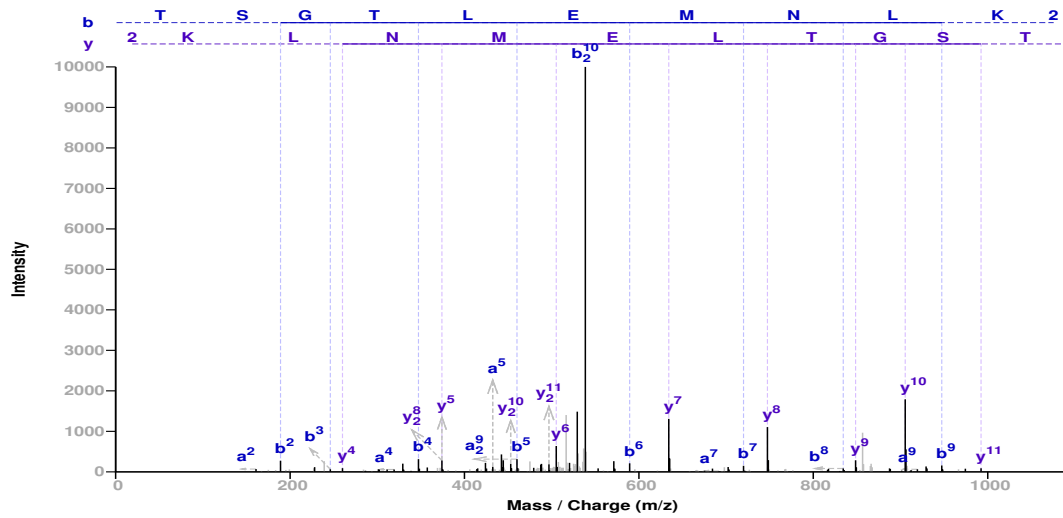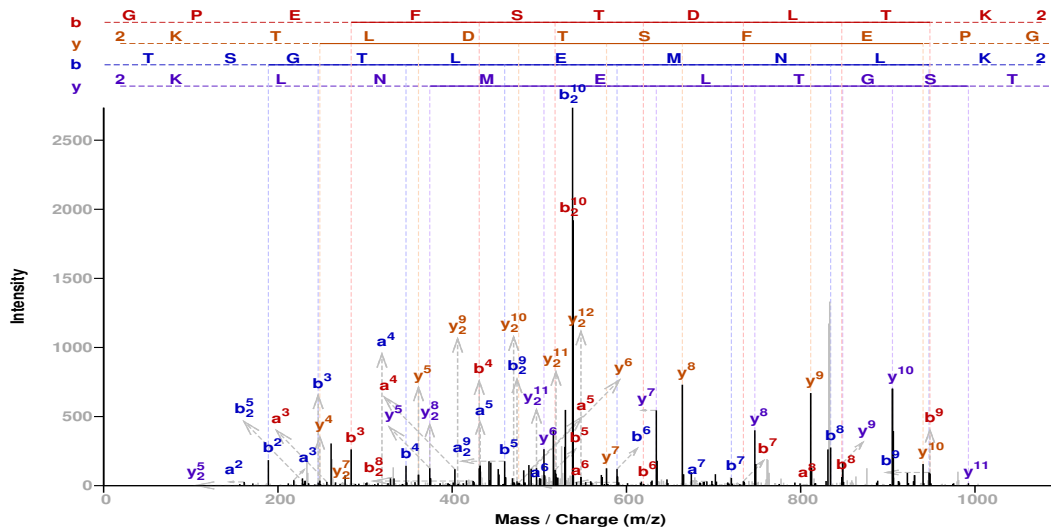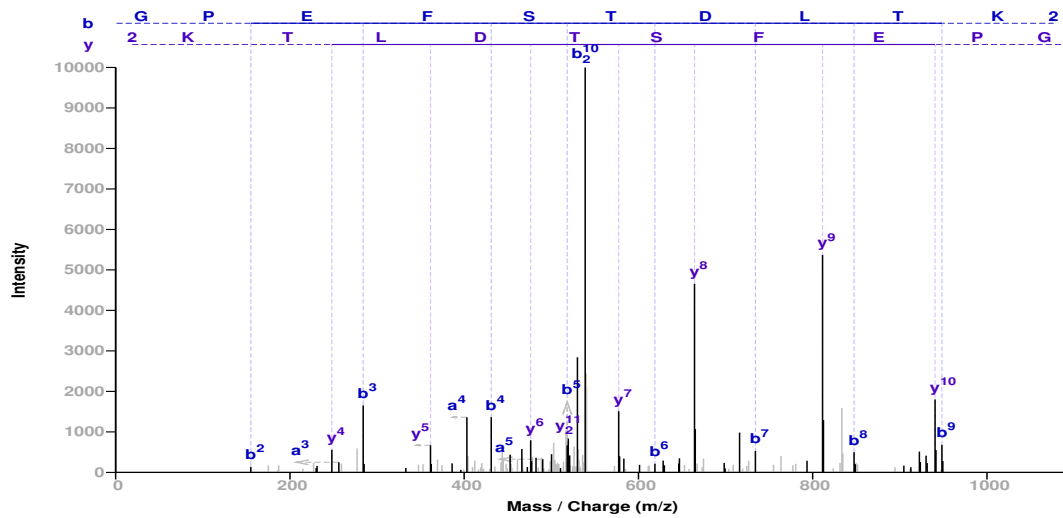

yeast4\_Scan\_Number\_4733 Precursor m/z: 355.684 cosine: 0.804  $\alpha$ : 0.685

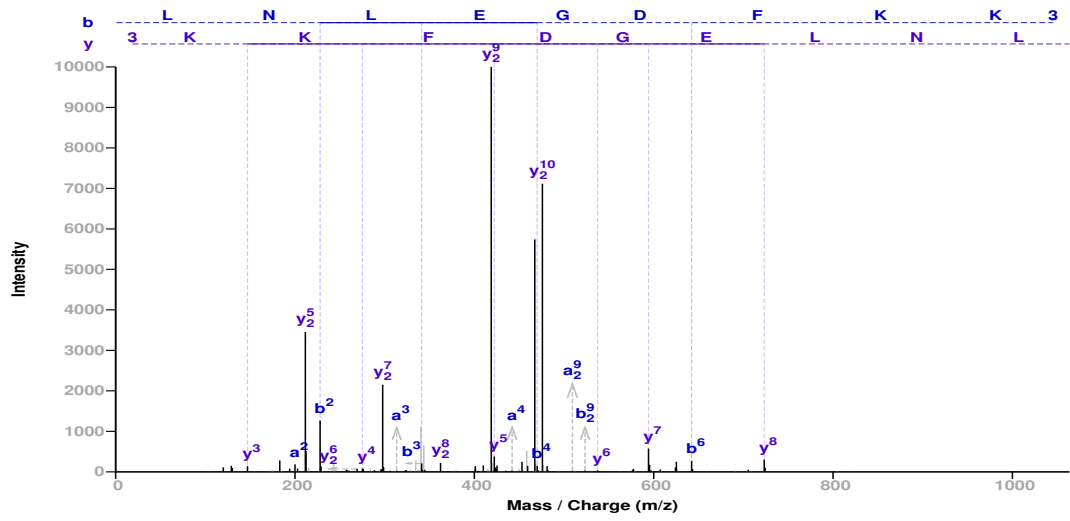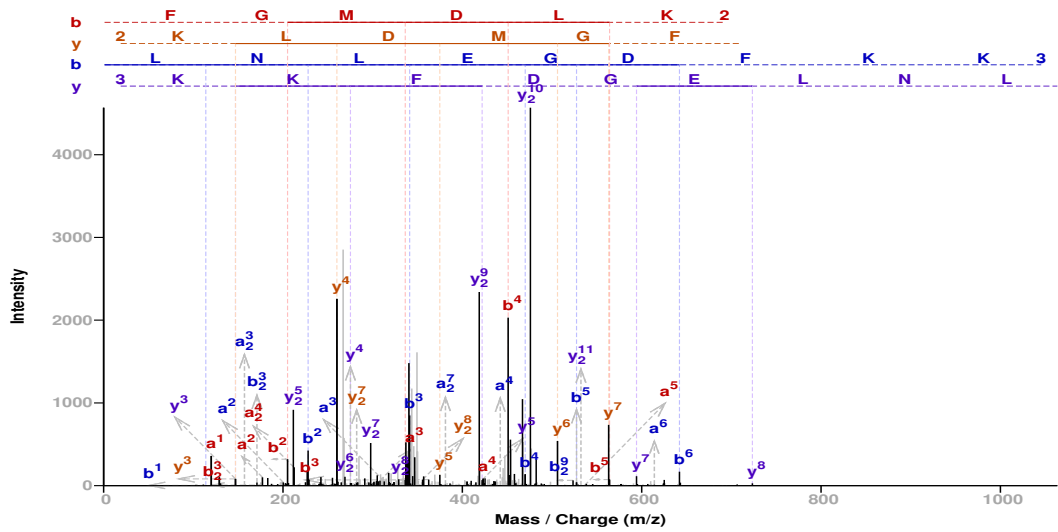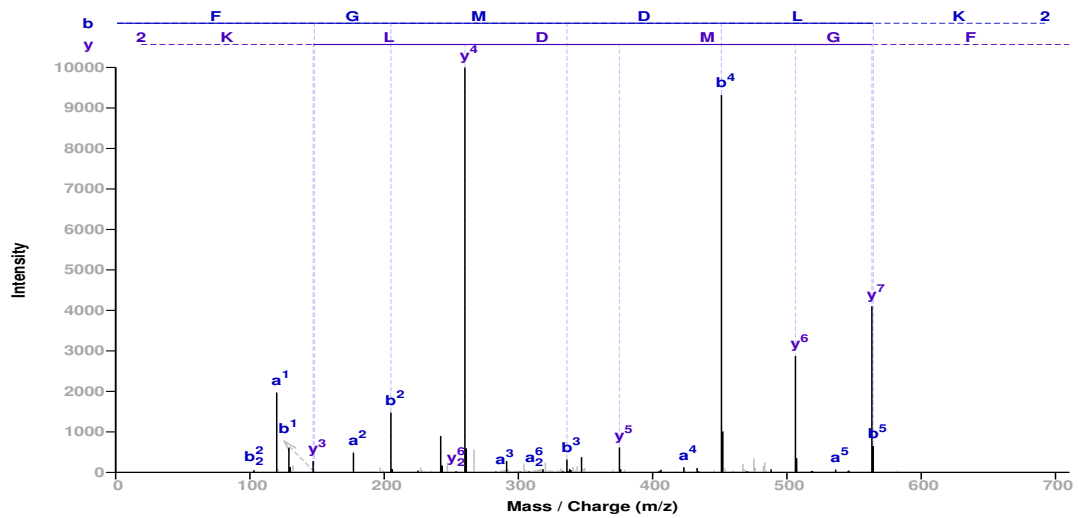

yeast4\_Scan\_Number\_1201 Precursor m/z: 433.229 cosine: 0.765  $\alpha$ : 0.673

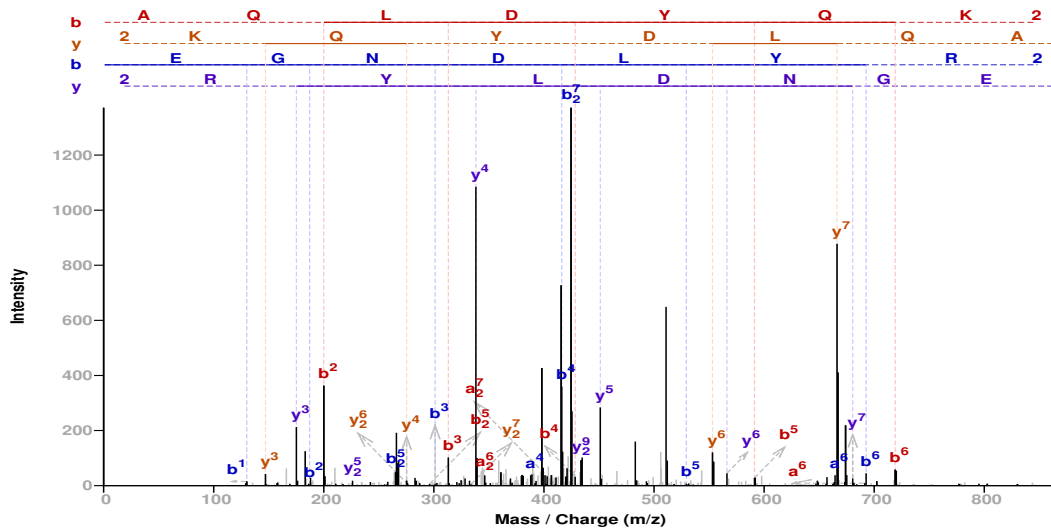

yeast4\_Scan\_Number\_971 Precursor m/z: 516.277 cosine: 0.766  $\alpha$ : 0.664

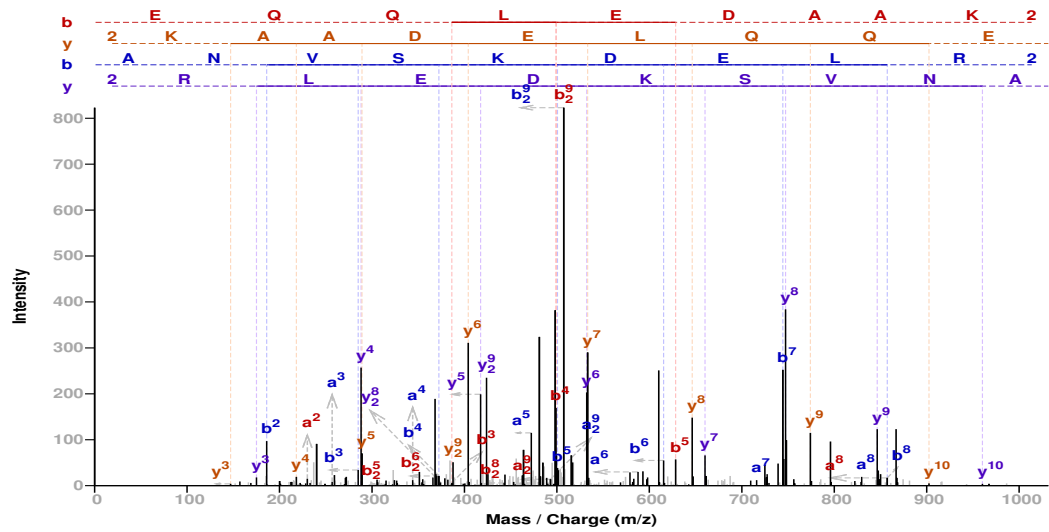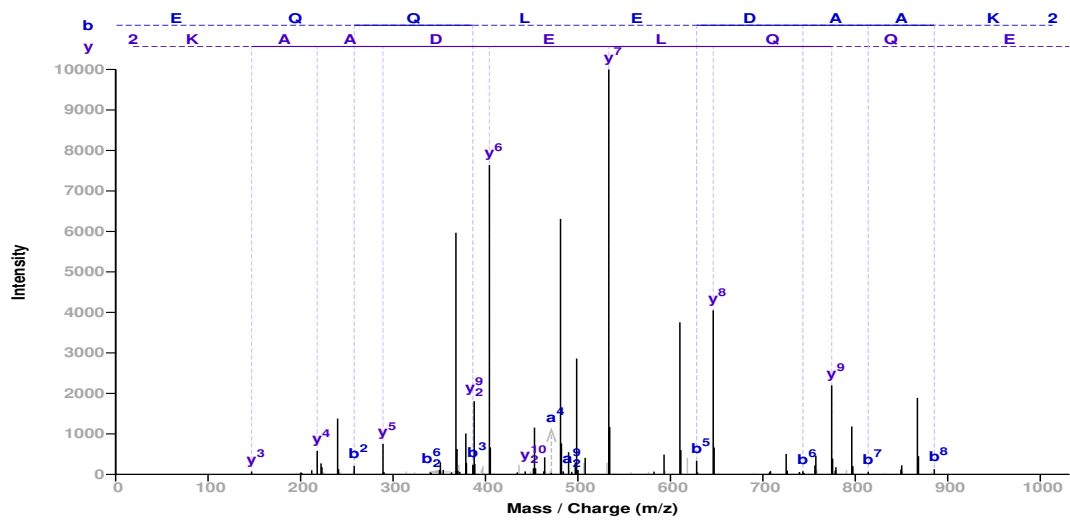



yeast4\_Scan\_Number\_5788 Precursor m/z: 478.777 cosine: 0.843  $\alpha$ : 0.646

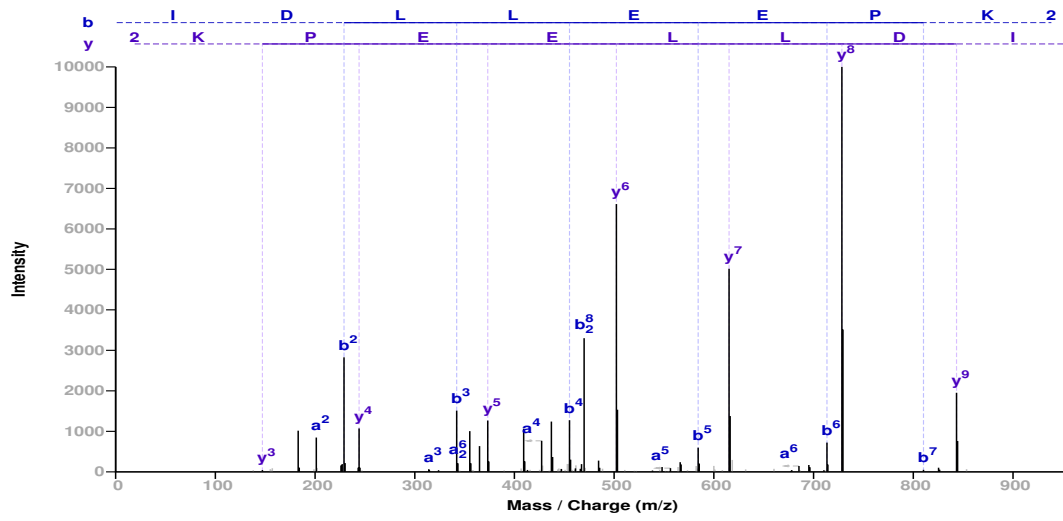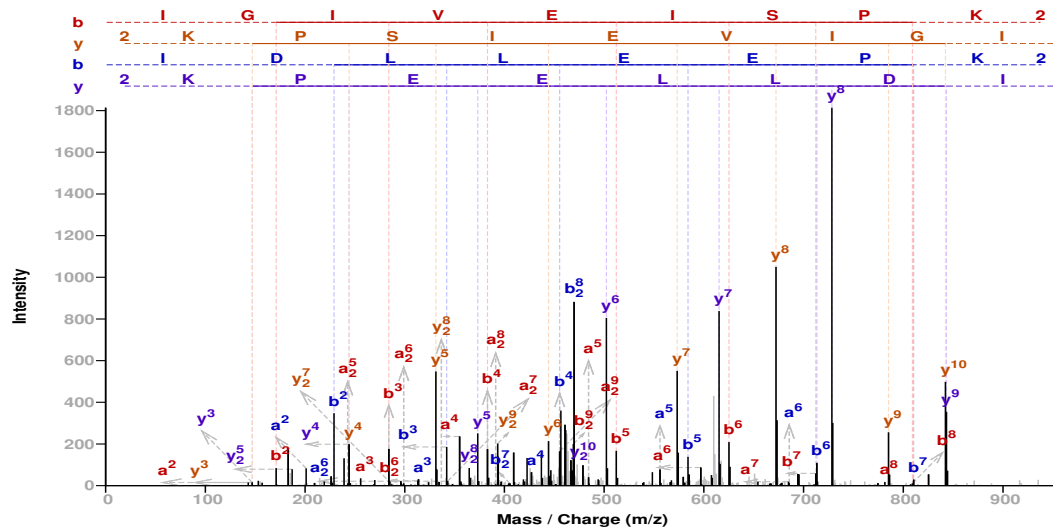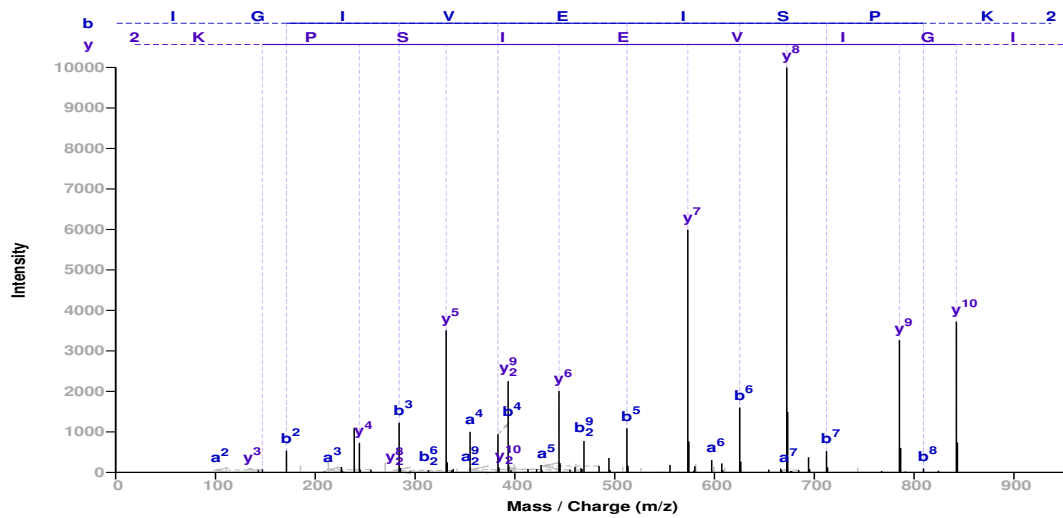

yeast4\_Scan\_Number\_2706 Precursor m/z: 613.341 cosine: 0.797  $\alpha$ : 0.640

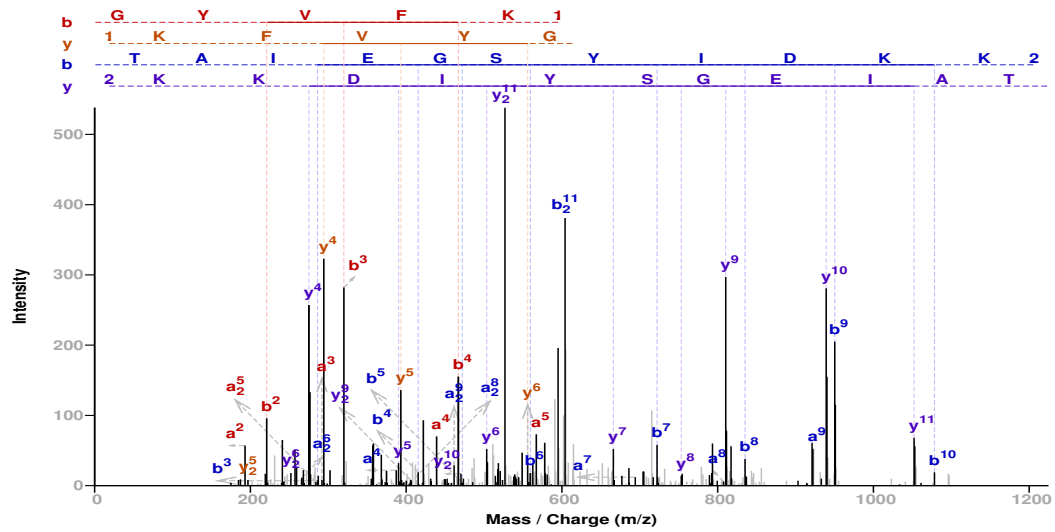

yeast4\_Scan\_Number\_3193 Precursor m/z: 581.257 cosine: 0.727  $\alpha$ : 0.638

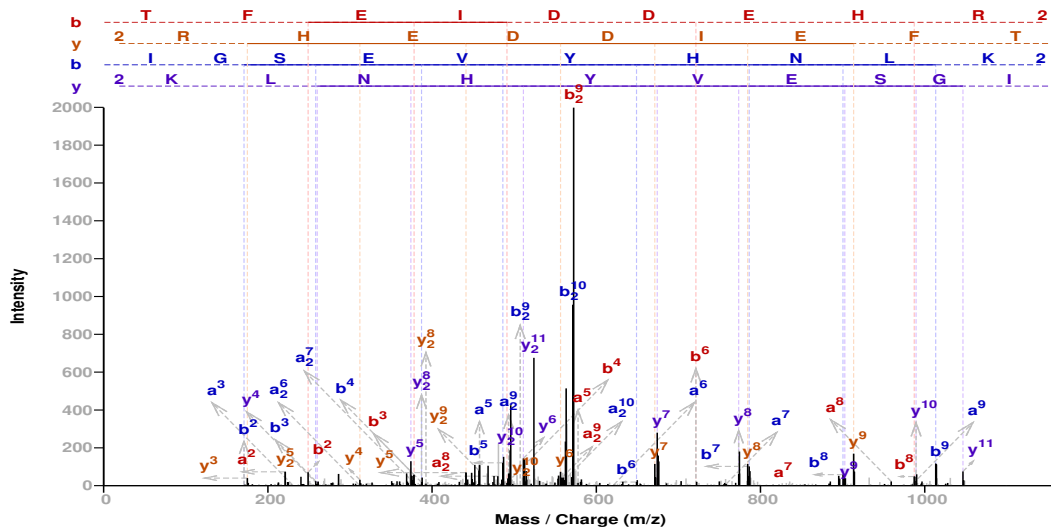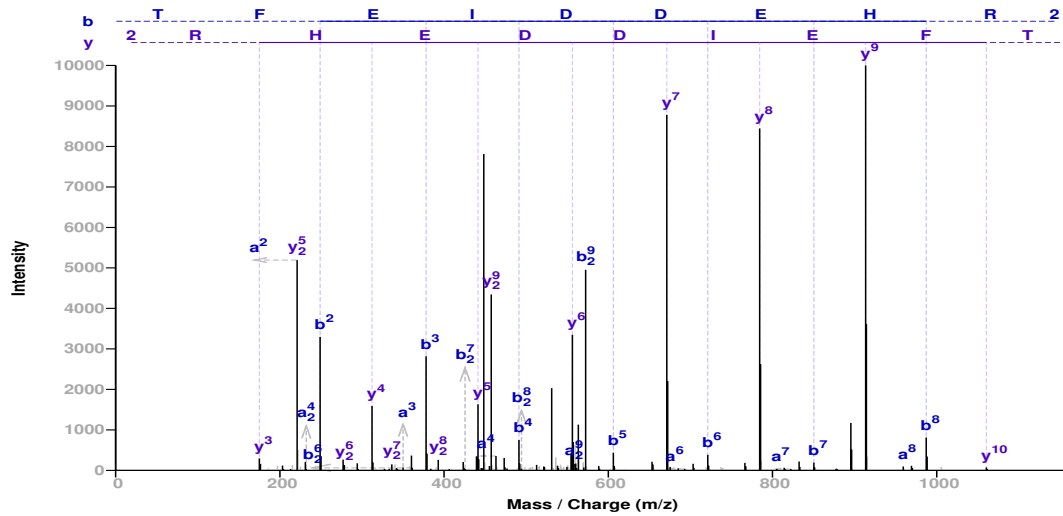

yeast4\_Scan\_Number\_7830 Precursor m/z: 643.877 cosine: 0.802  $\alpha$ : 0.637

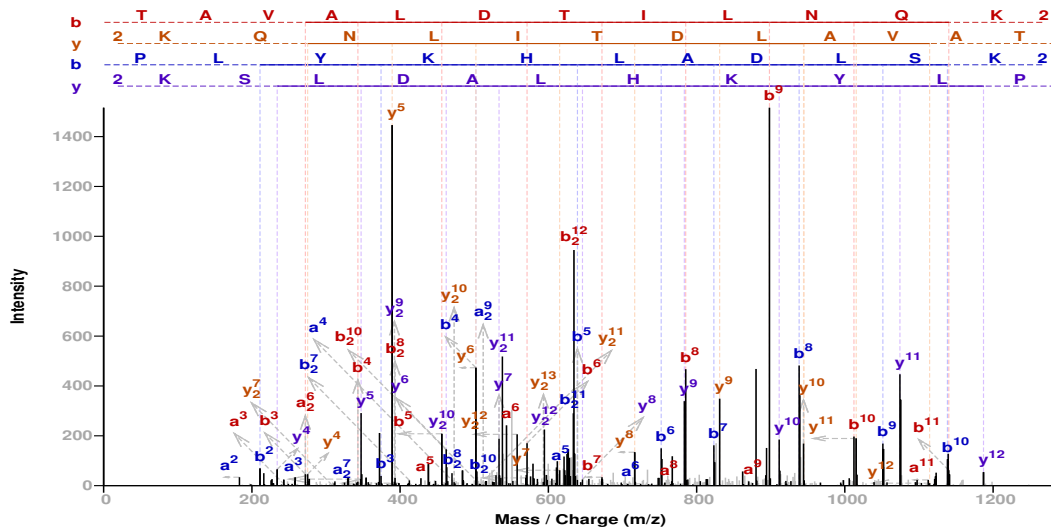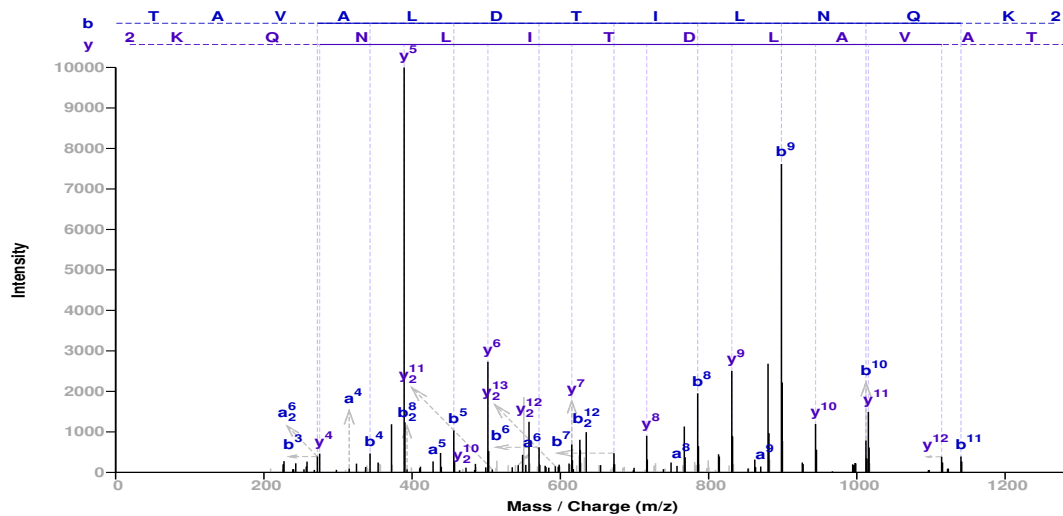



yeast4.Scan\_Number\_6615 Precursor m/z: 435.792 cosine: 0.794  $\alpha$ : 0.630

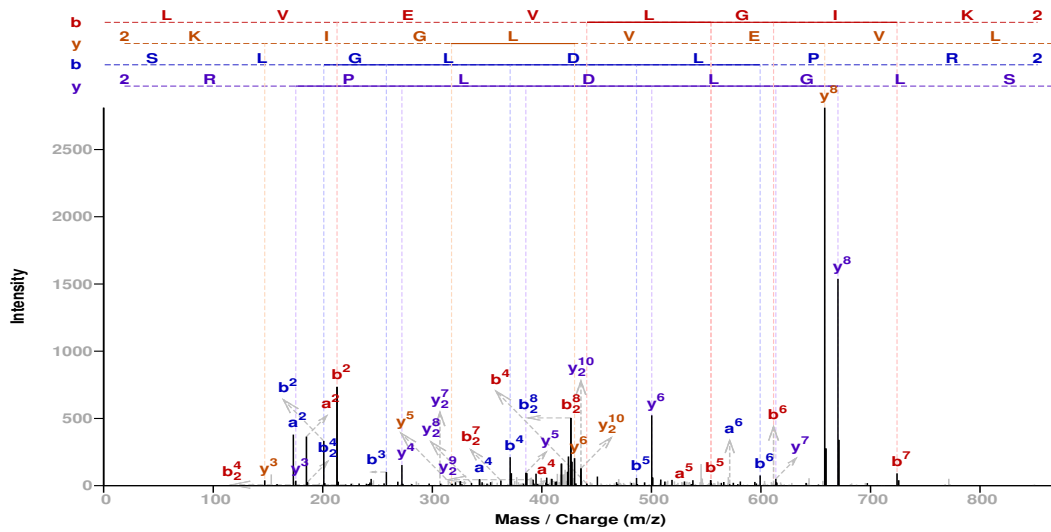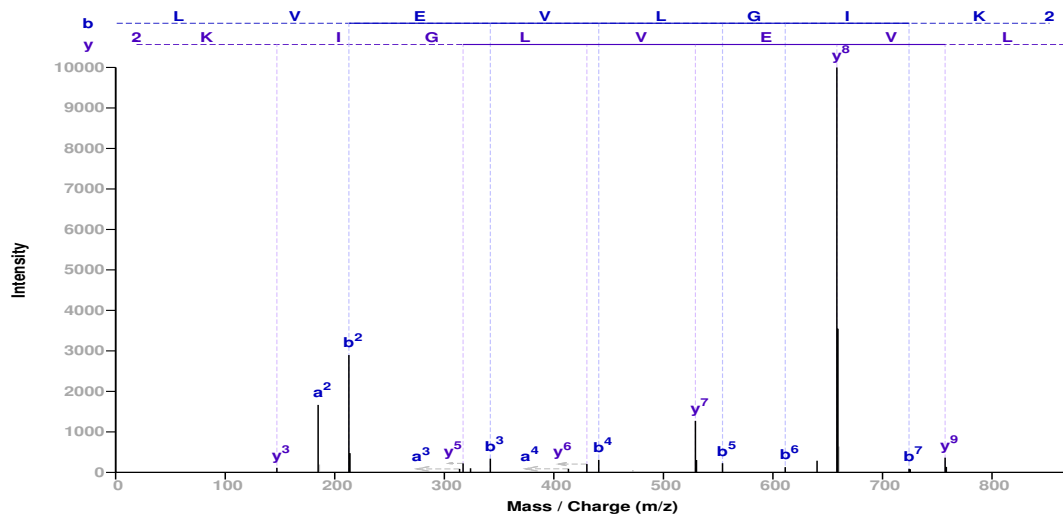

yeast4\_Scan\_Number\_3298 Precursor m/z: 389.713 cosine: 0.744  $\alpha$ : 0.616

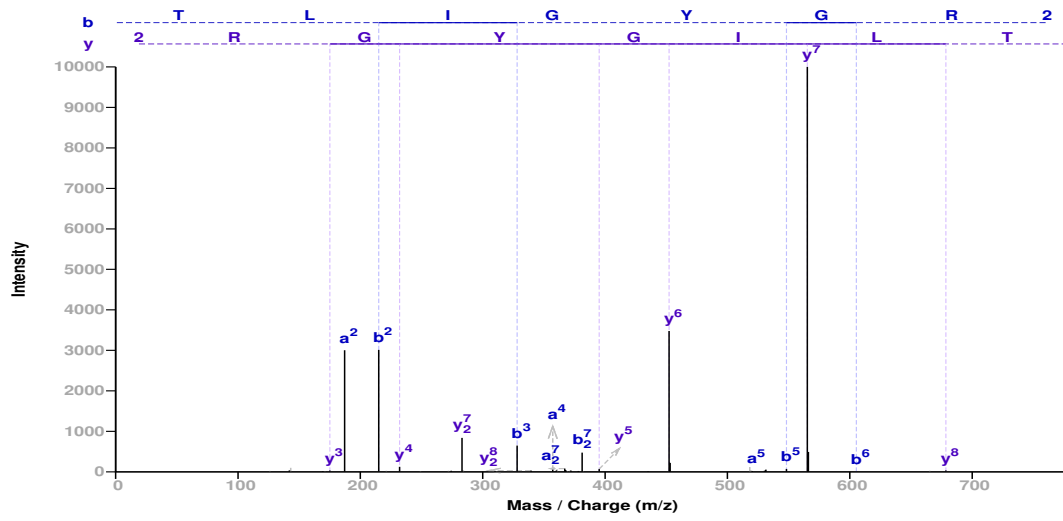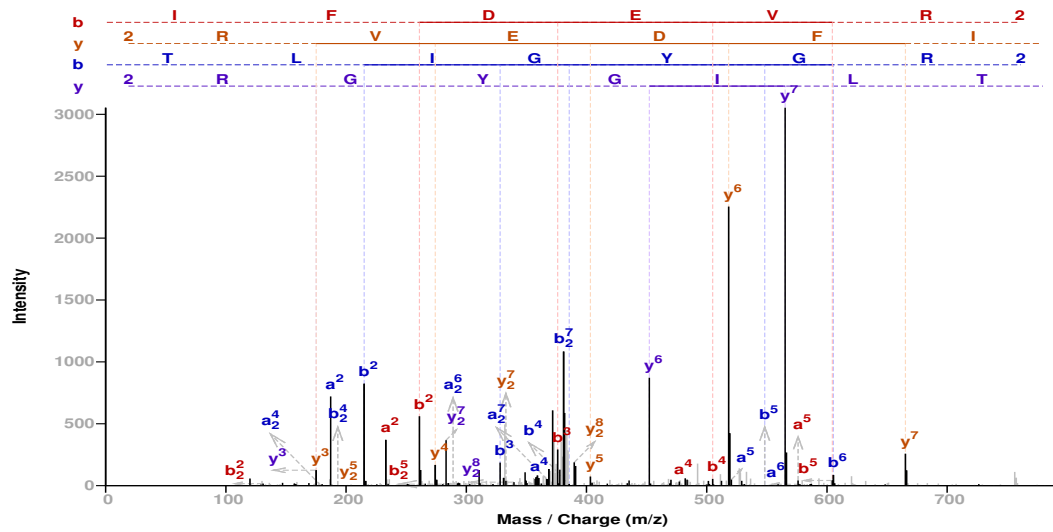





yeast4\_Scan\_Number\_3314 Precursor m/z: 447.246 cosine: 0.756  $\alpha$ : 0.601

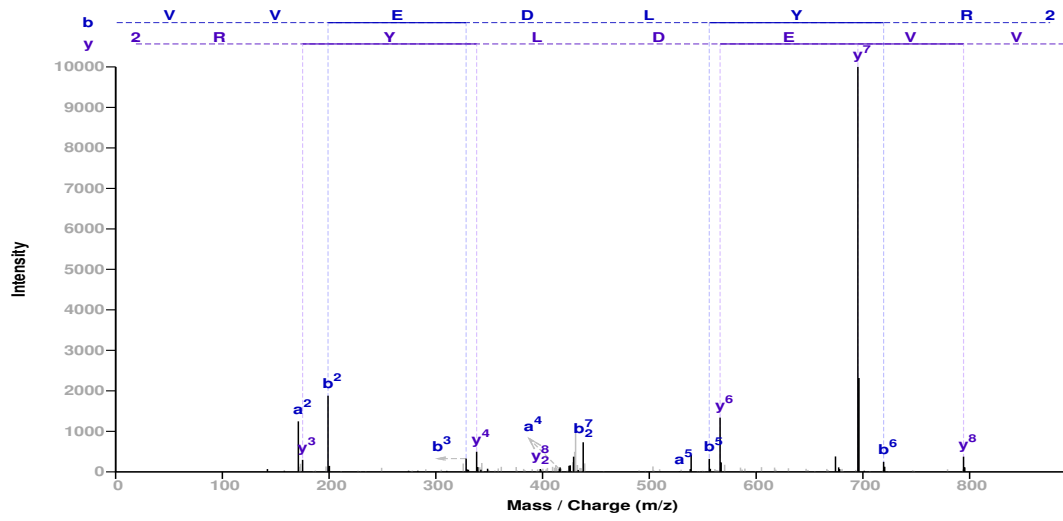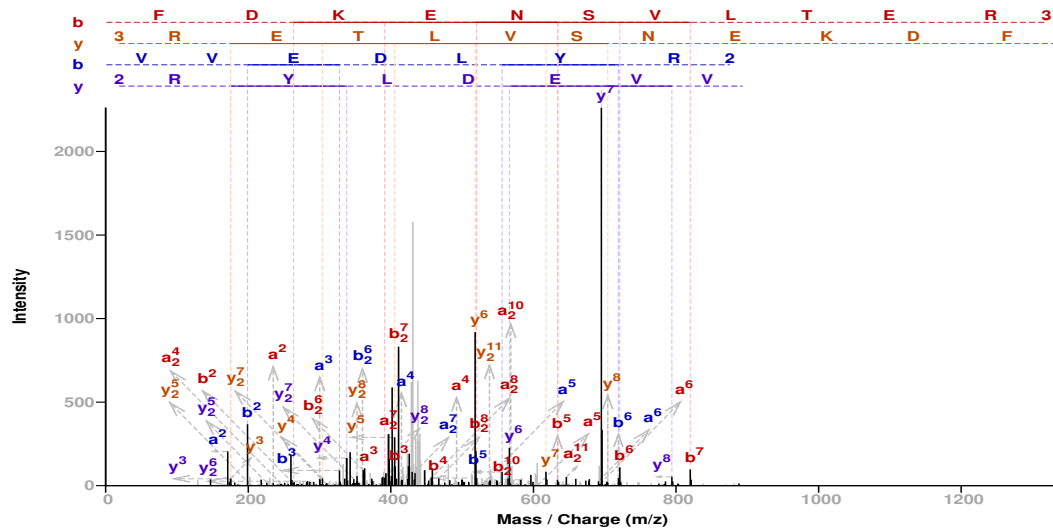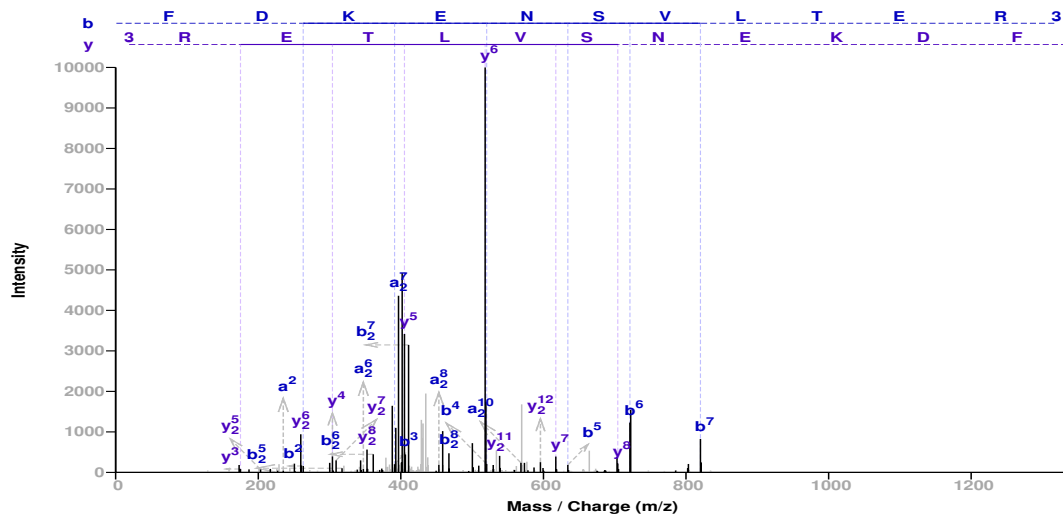

yeast4\_Scan\_Number\_2585 Precursor m/z: 421.254 cosine: 0.738  $\alpha$ : 0.559

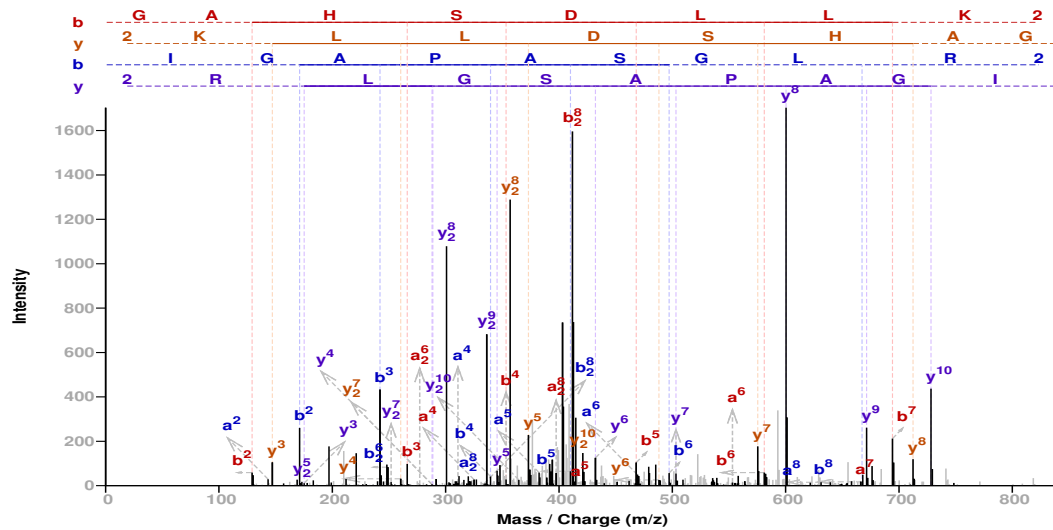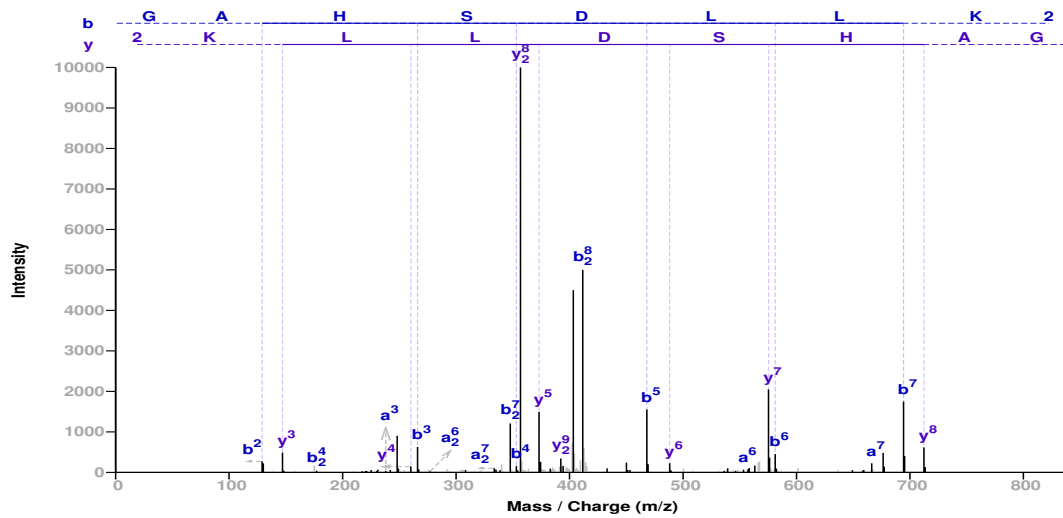

yeast4\_Scan\_Number\_3007 Precursor m/z: 641.805 cosine: 0.803  $\alpha$ : 0.541

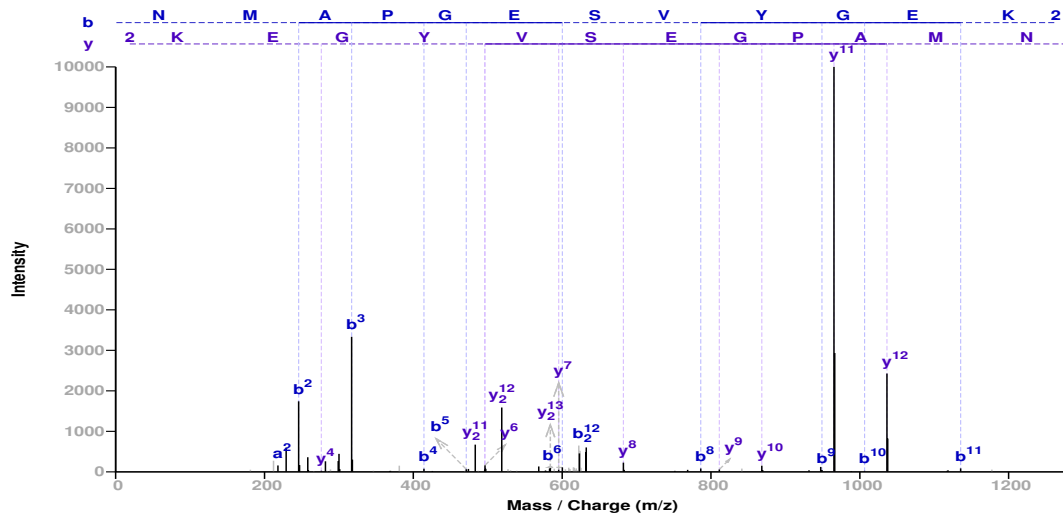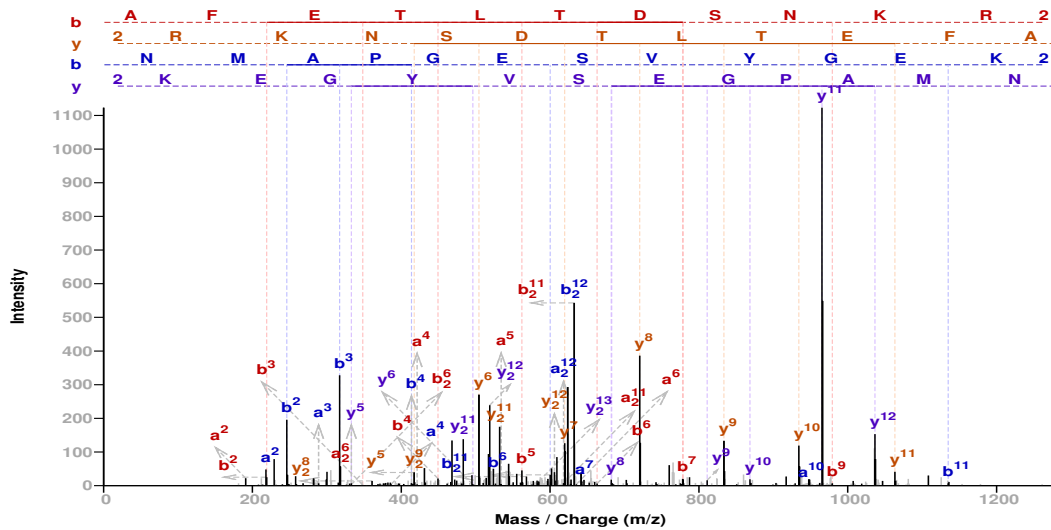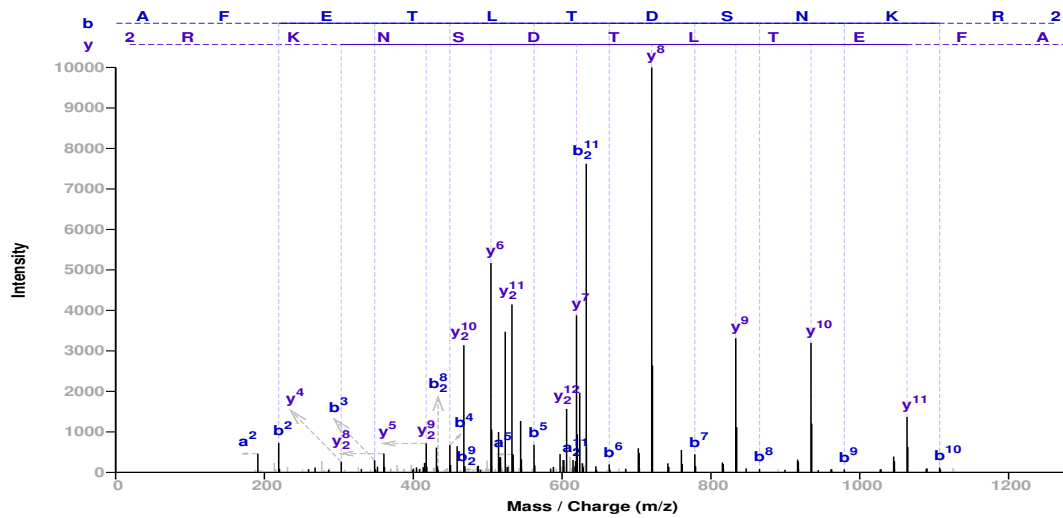

yeast4\_Scan\_Number\_7582 Precursor m/z: 587.339 cosine: 0.753  $\alpha$ : 0.537

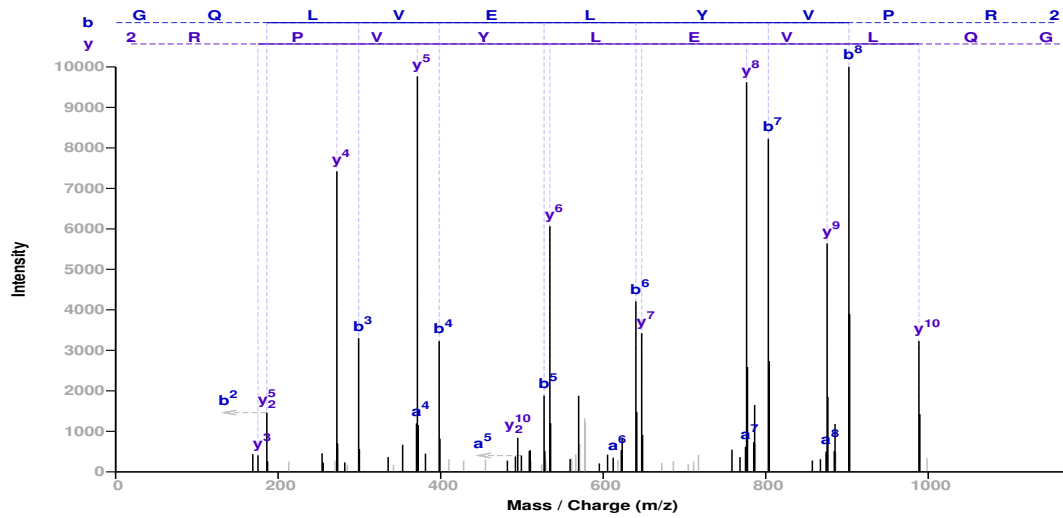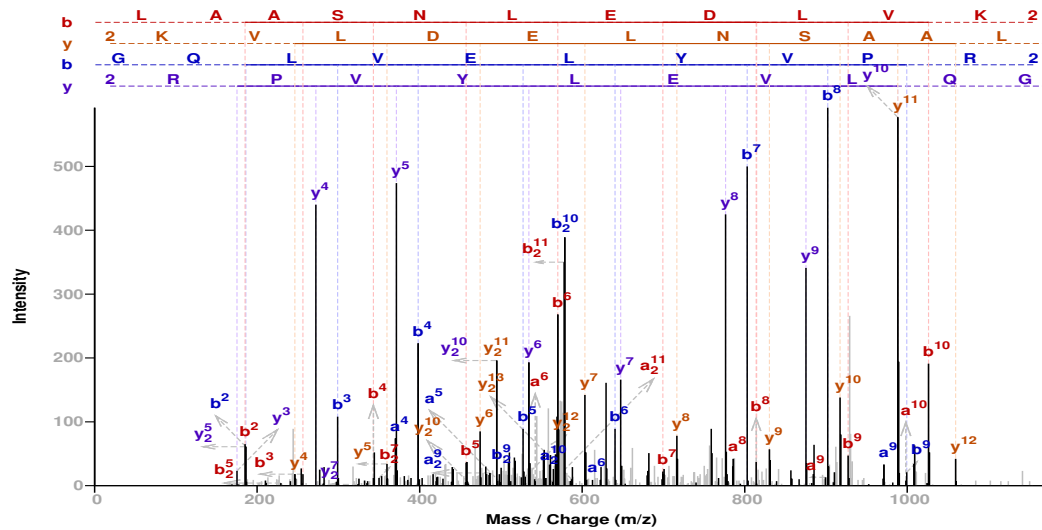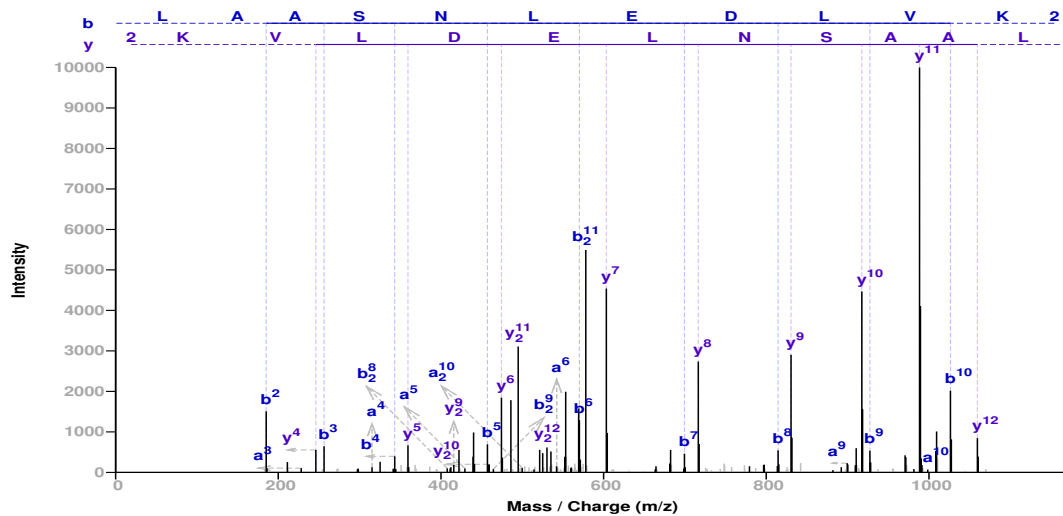

yeast4\_Scan\_Number\_1931 Precursor m/z: 380.718 cosine: 0.731  $\alpha$ : 0.528

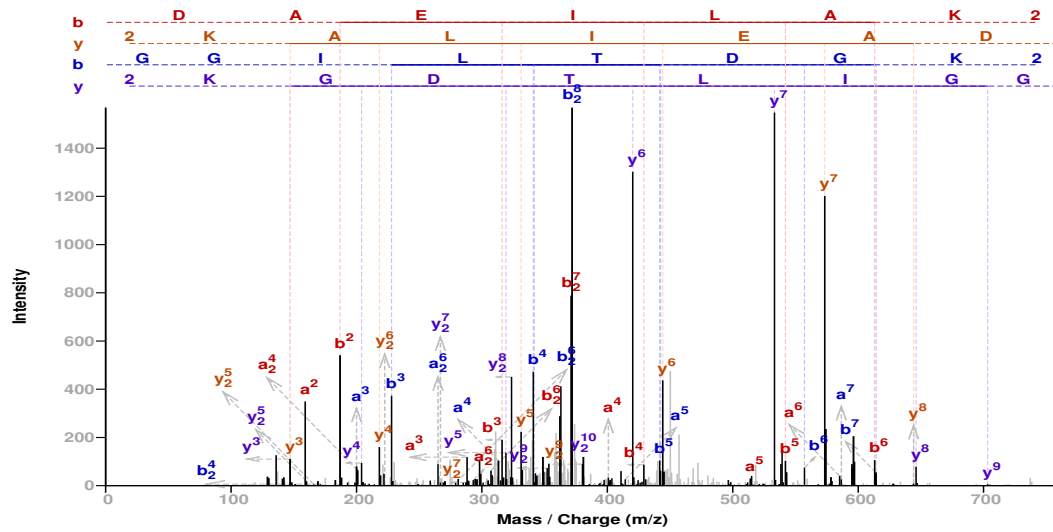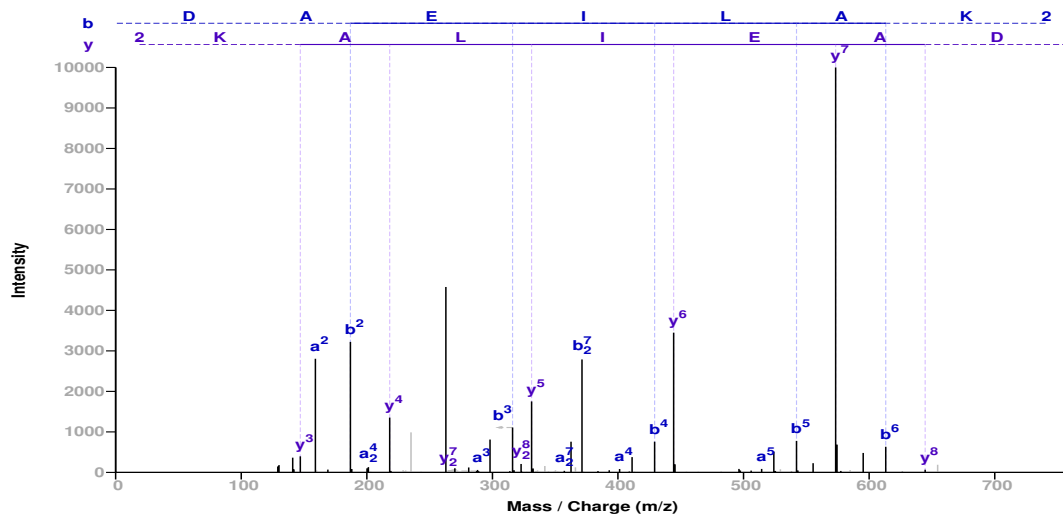

yeast4\_Scan\_Number\_7191 Precursor m/z: 813.449 cosine: 0.757  $\alpha$ : 0.516

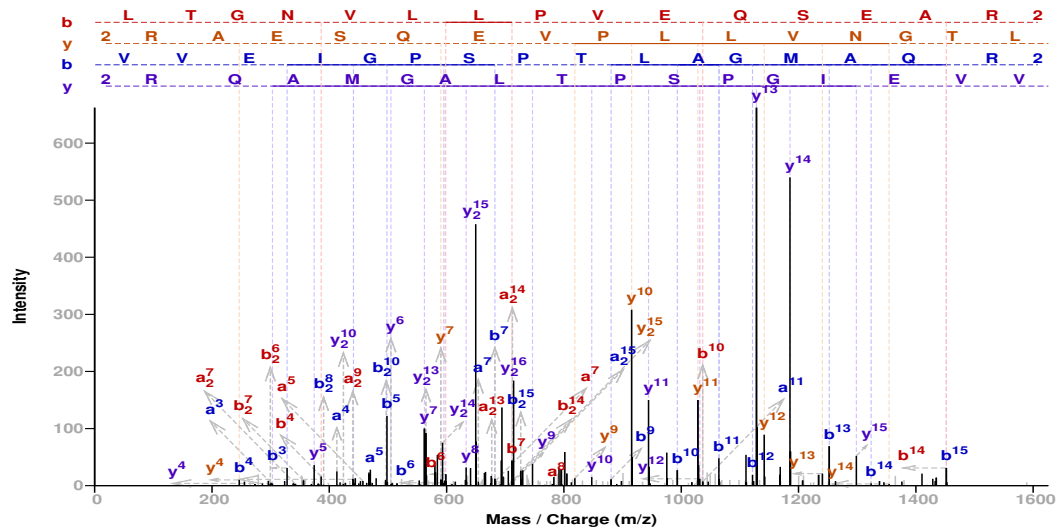

yeast4\_Scan\_Number\_3779 Precursor m/z: 546.781 cosine: 0.765  $\alpha$ : 0.508

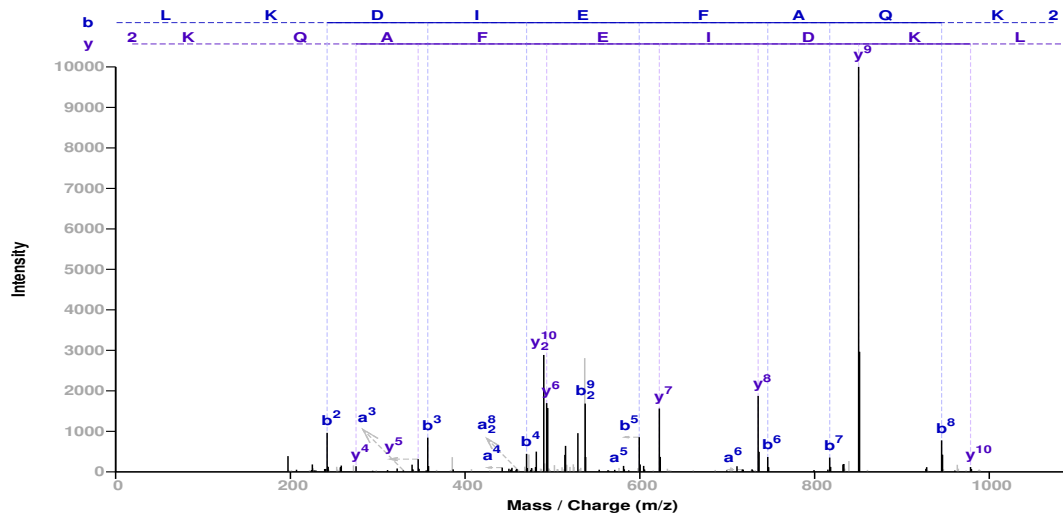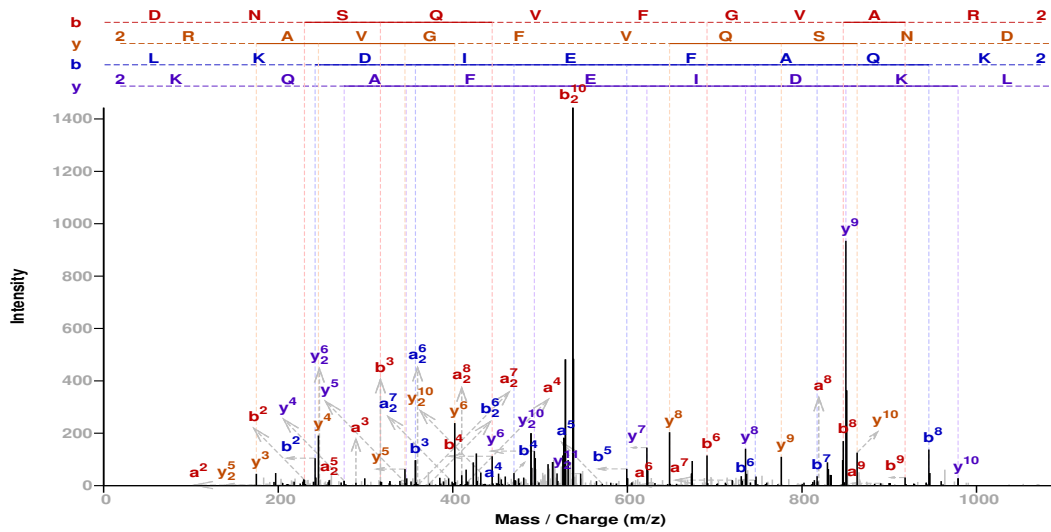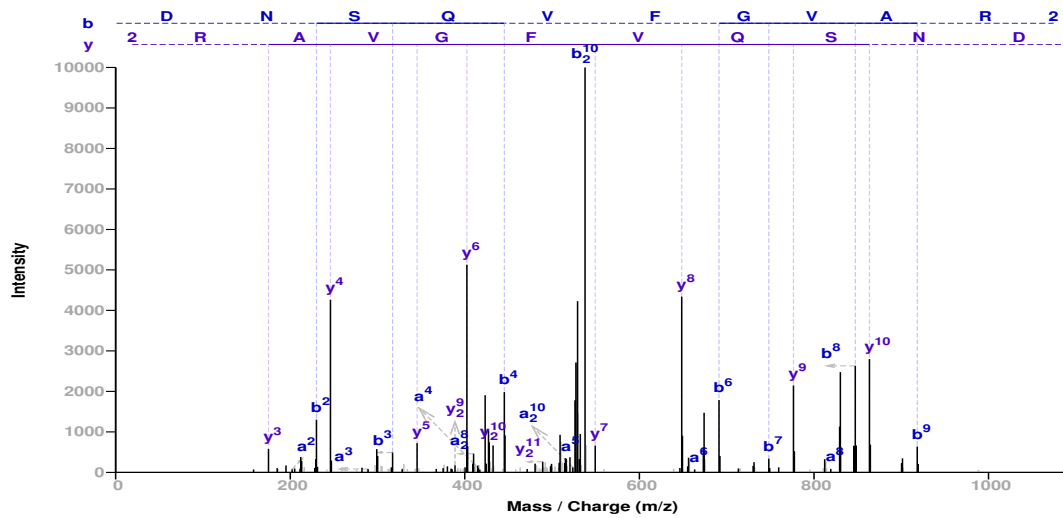

yeast4\_Scan\_Number\_3087 Precursor m/z: 484.744 cosine: 0.846  $\alpha$ : 0.507

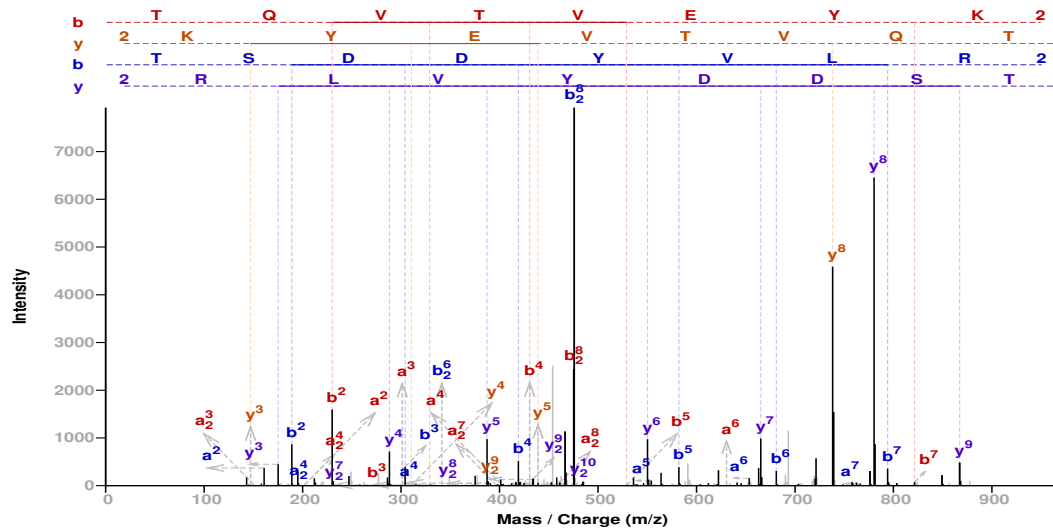





yeast4\_Scan\_Number\_3426 Precursor m/z: 378.744 cosine: 0.873  $\alpha$ : 0.490

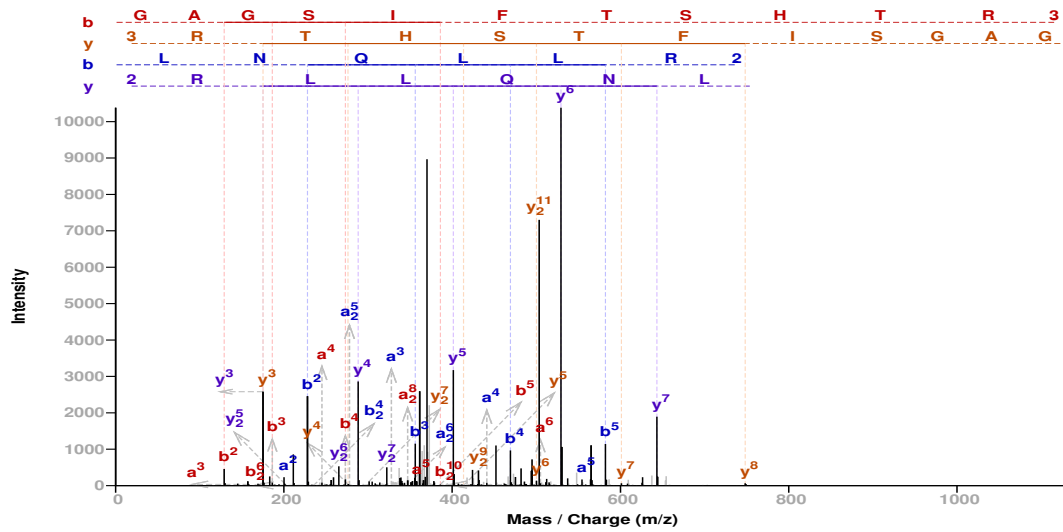

yeast4.Scan\_Number\_5429 Precursor m/z: 412.567 cosine: 0.862  $\alpha$ : 0.487

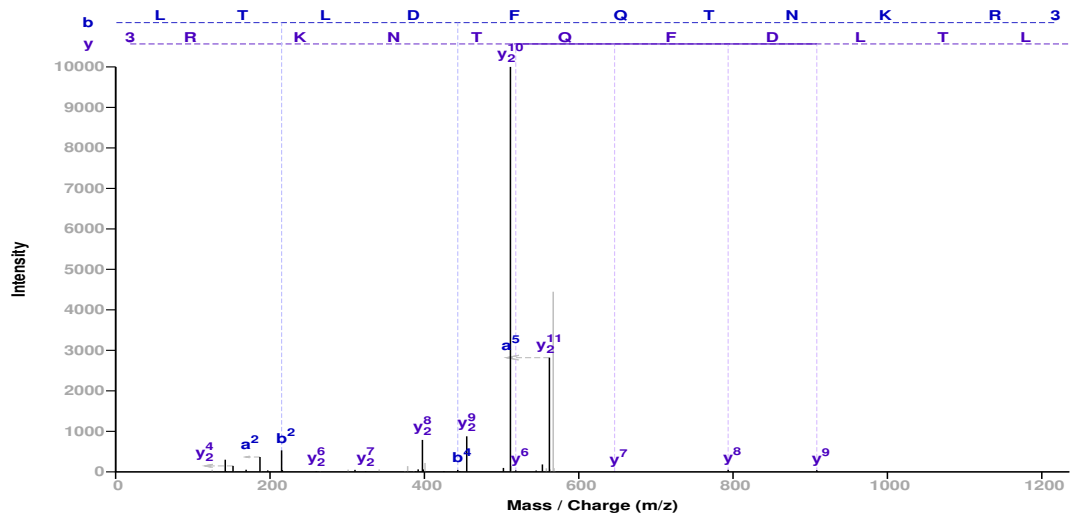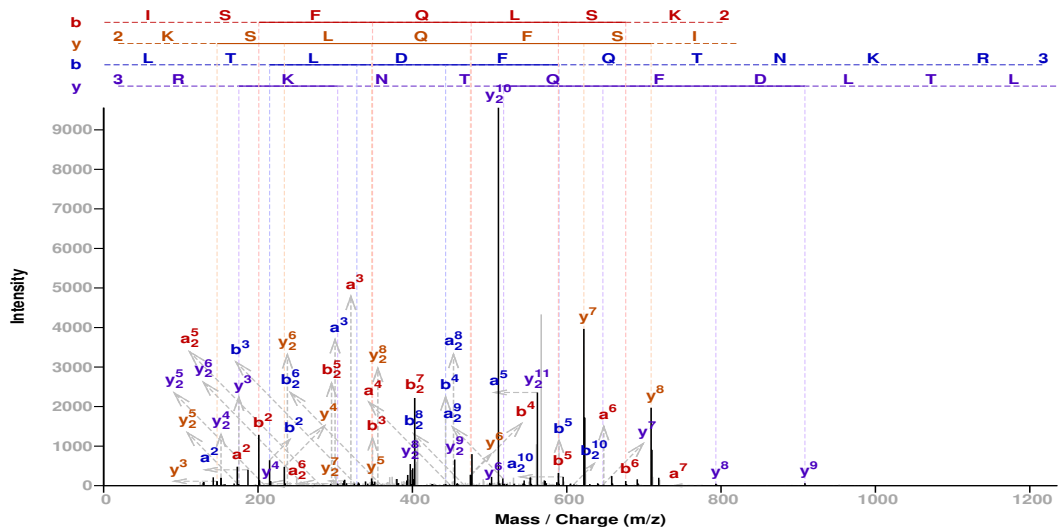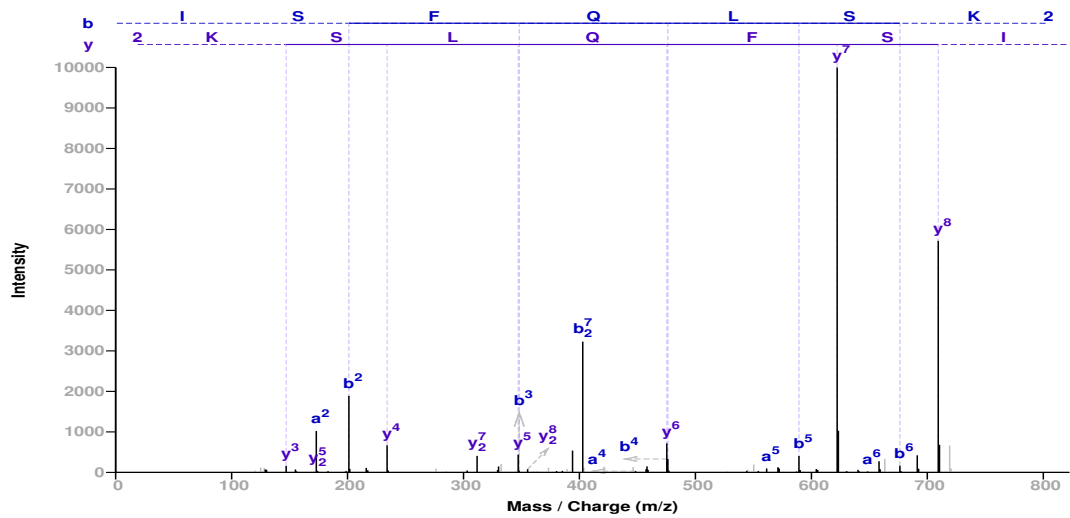

yeast4\_Scan\_Number\_5280 Precursor m/z: 488.285 cosine: 0.756  $\alpha$ : 0.482

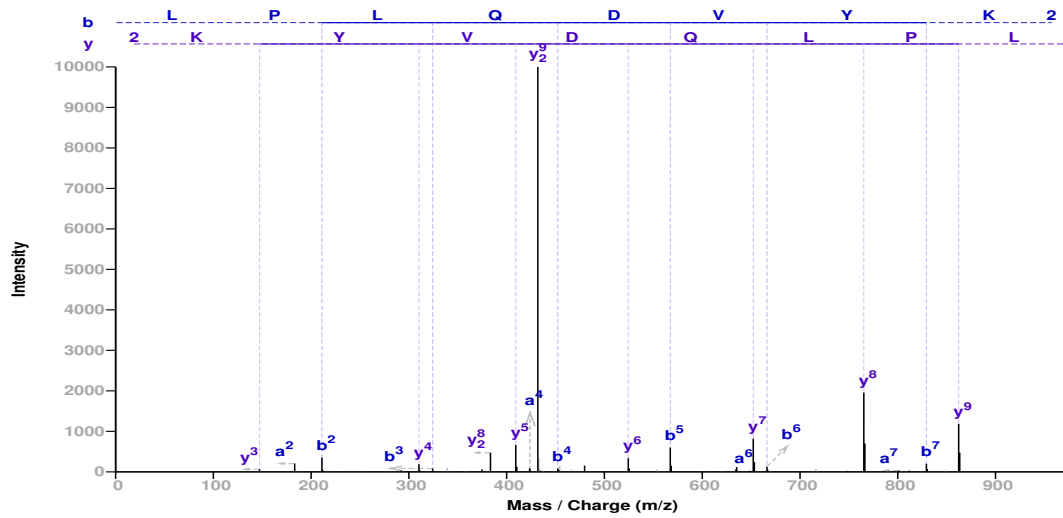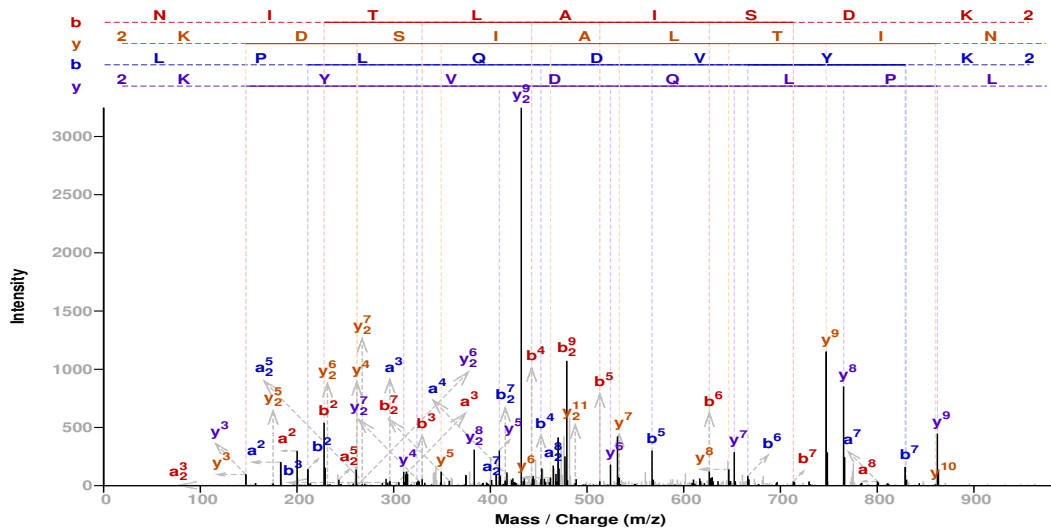



yeast4\_Scan\_Number\_5943 Precursor m/z: 556.302 cosine: 0.792  $\alpha$ : 0.477

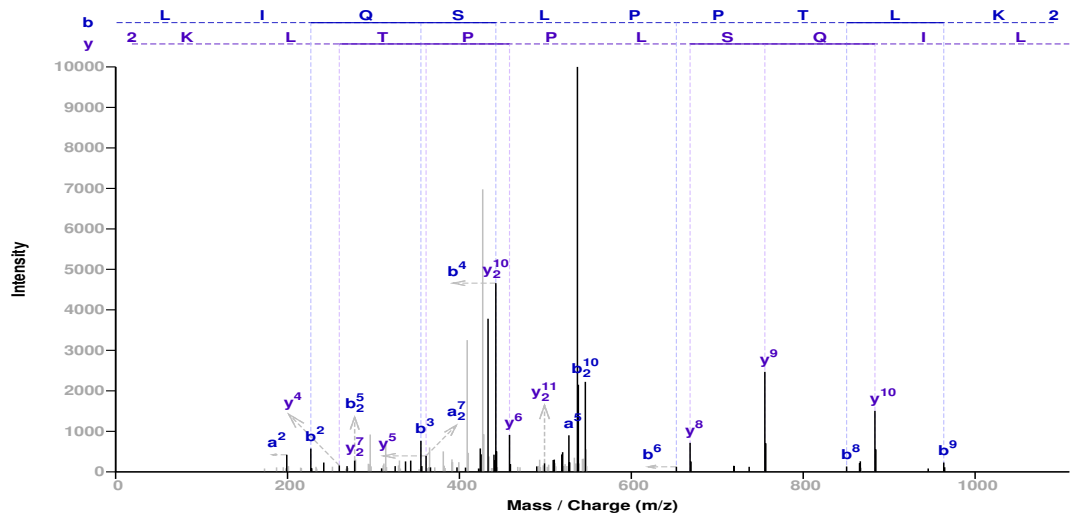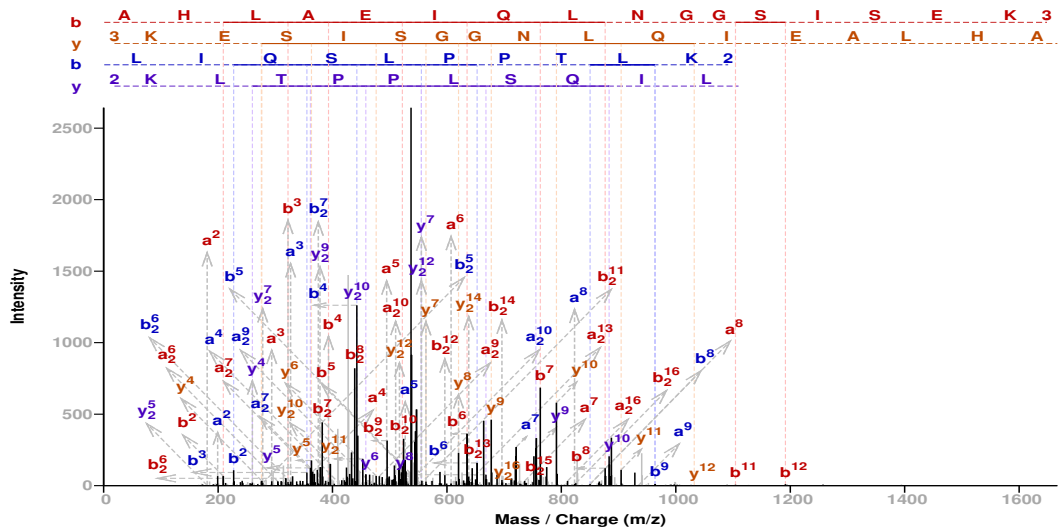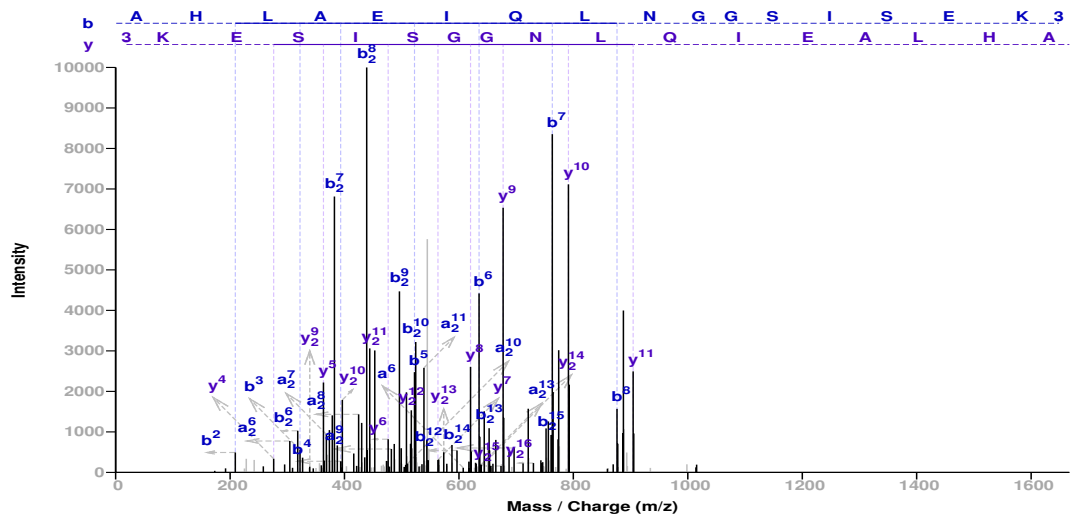

yeast4\_Scan\_Number\_3990 Precursor m/z: 418.587 cosine: 0.769  $\alpha$ : 0.474

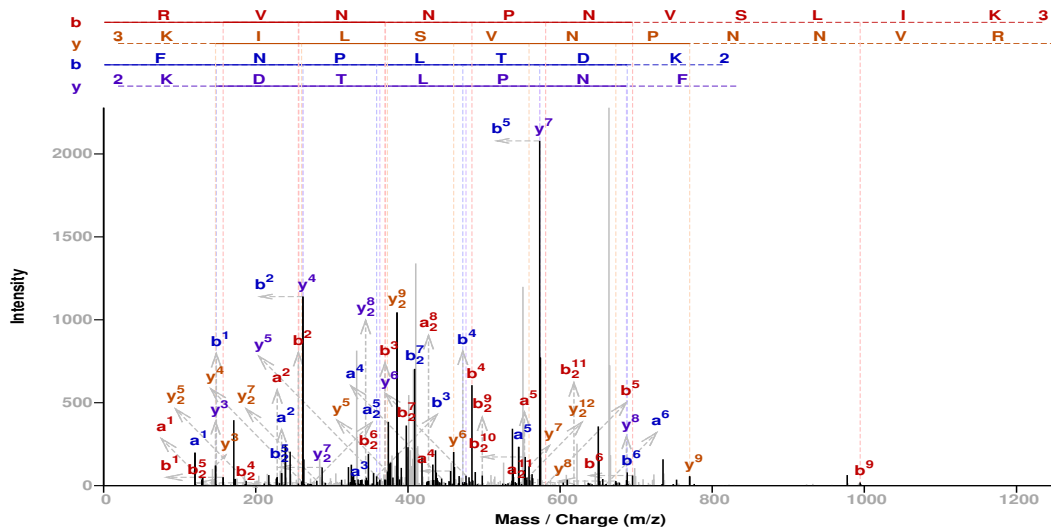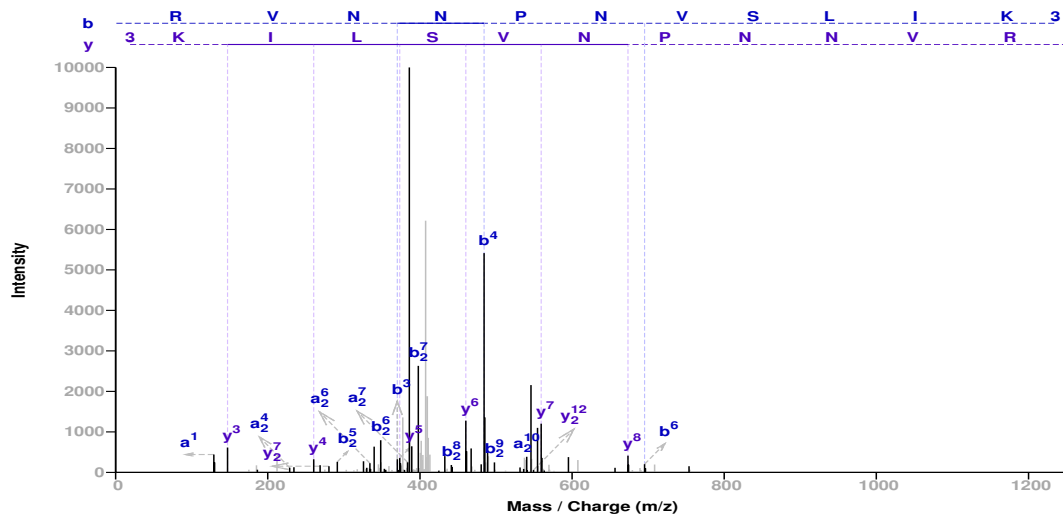

yeast4\_Scan\_Number\_980 Precursor m/z: 494.264 cosine: 0.752  $\alpha$ : 0.474

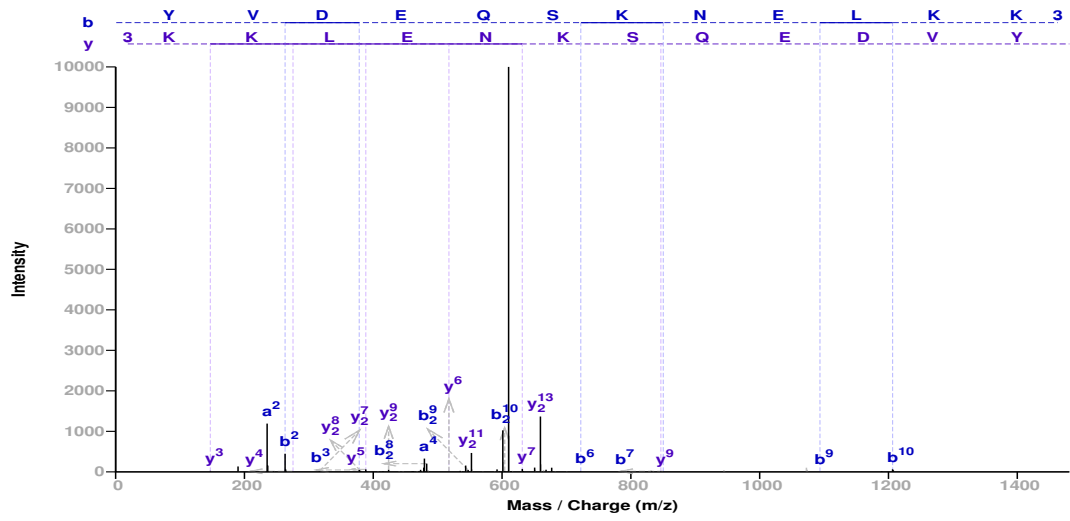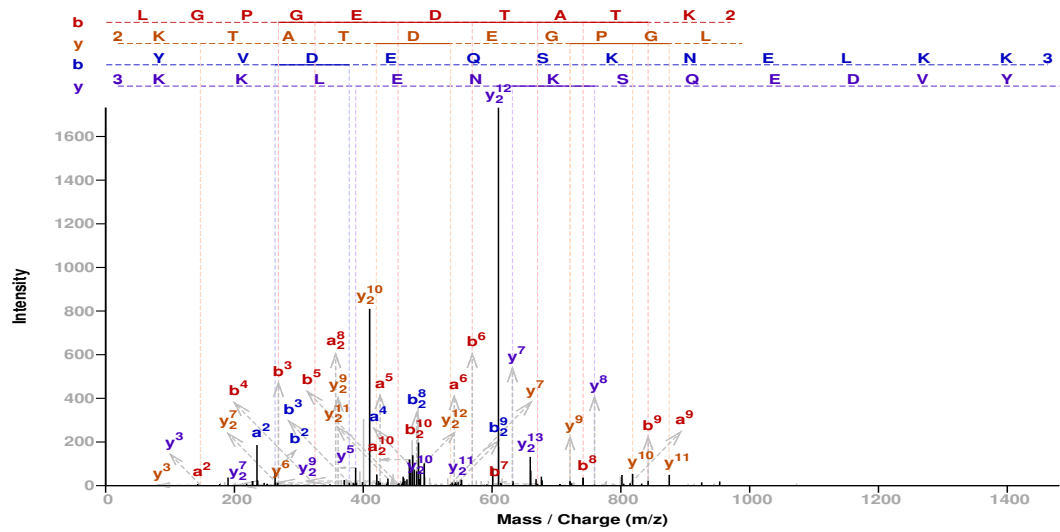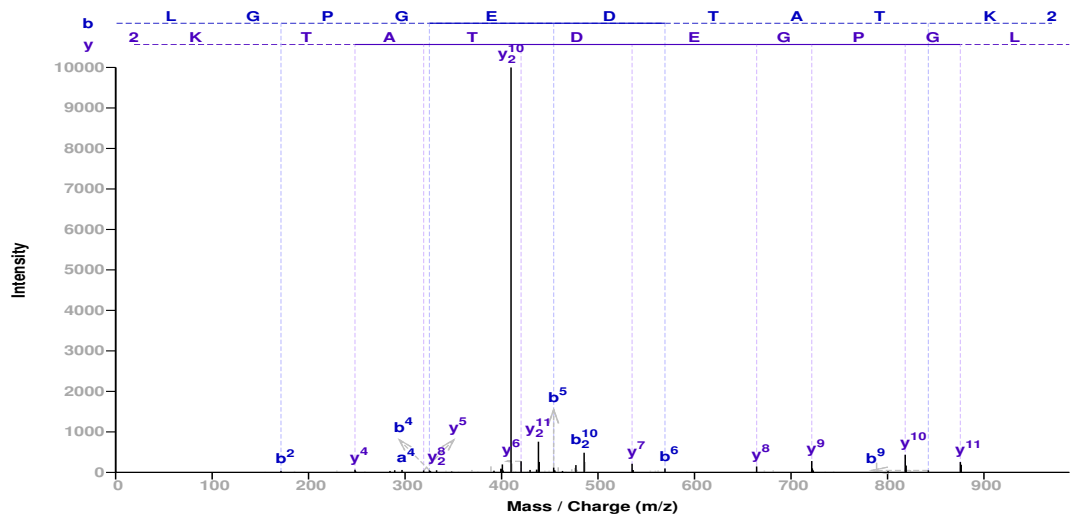



yeast4\_Scan\_Number\_3951 Precursor m/z: 522.788 cosine: 0.732  $\alpha$ : 0.469

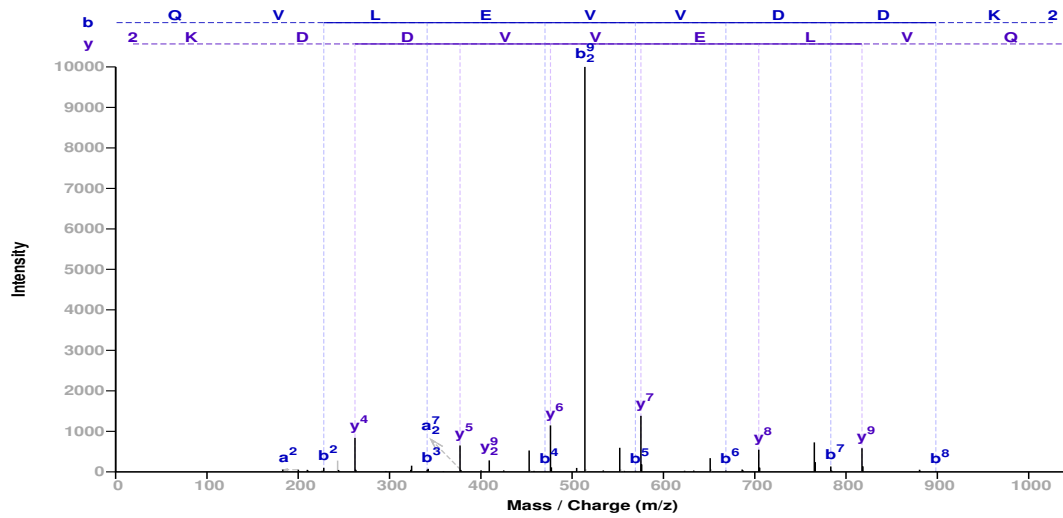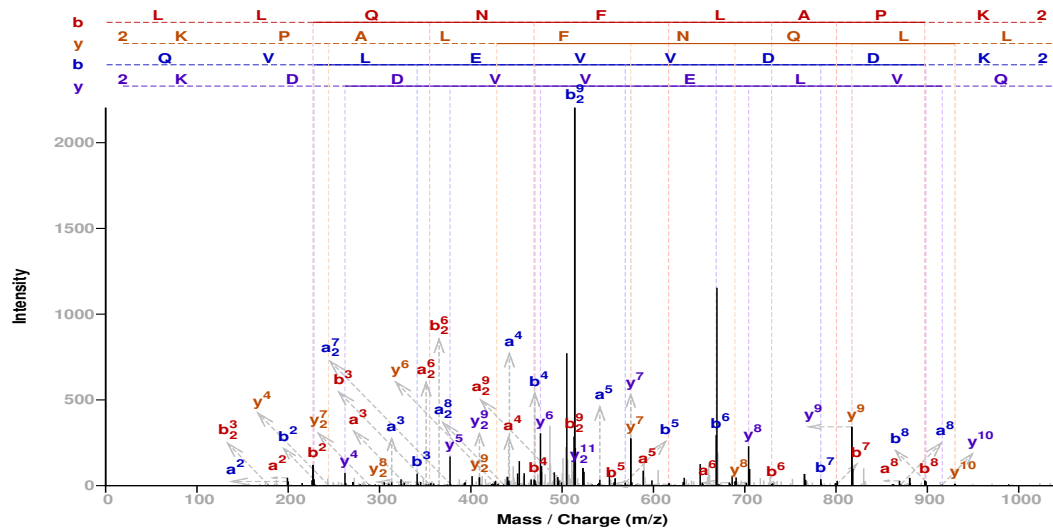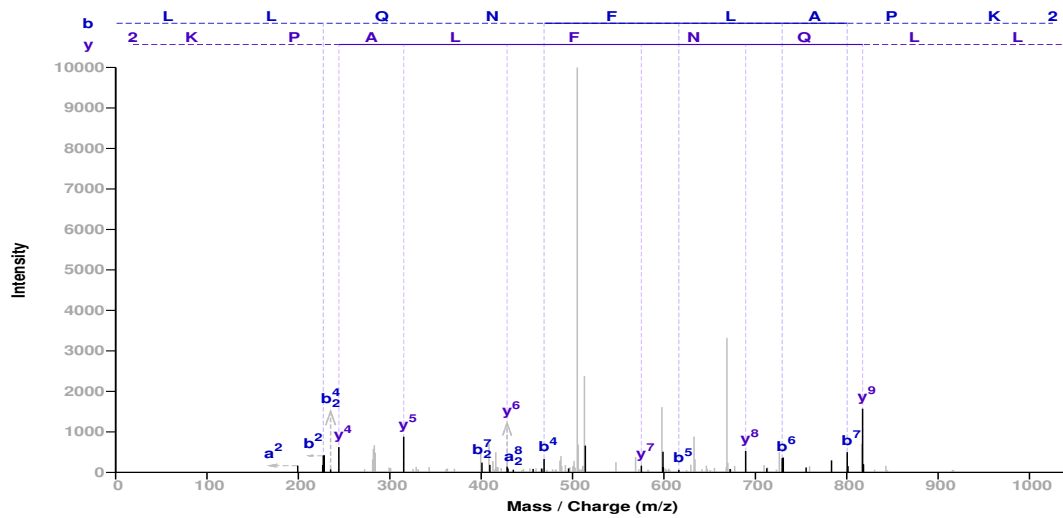

yeast4.Scan\_Number\_2402 Precursor m/z: 543.239 cosine: 0.817  $\alpha$ : 0.469

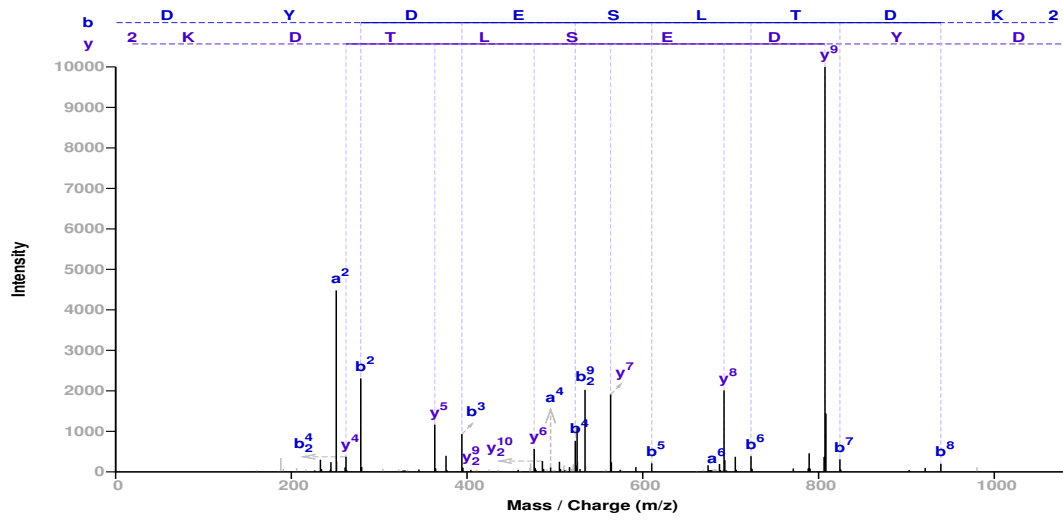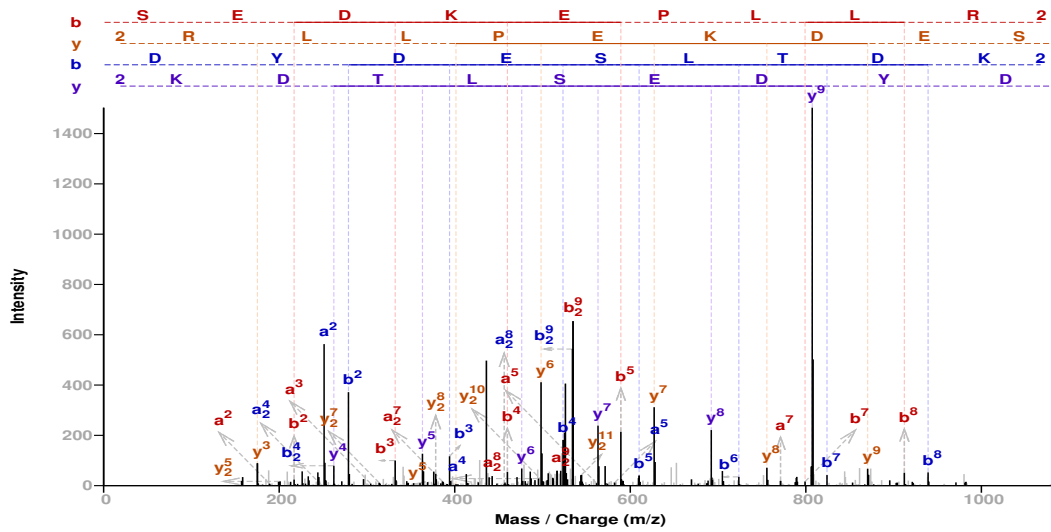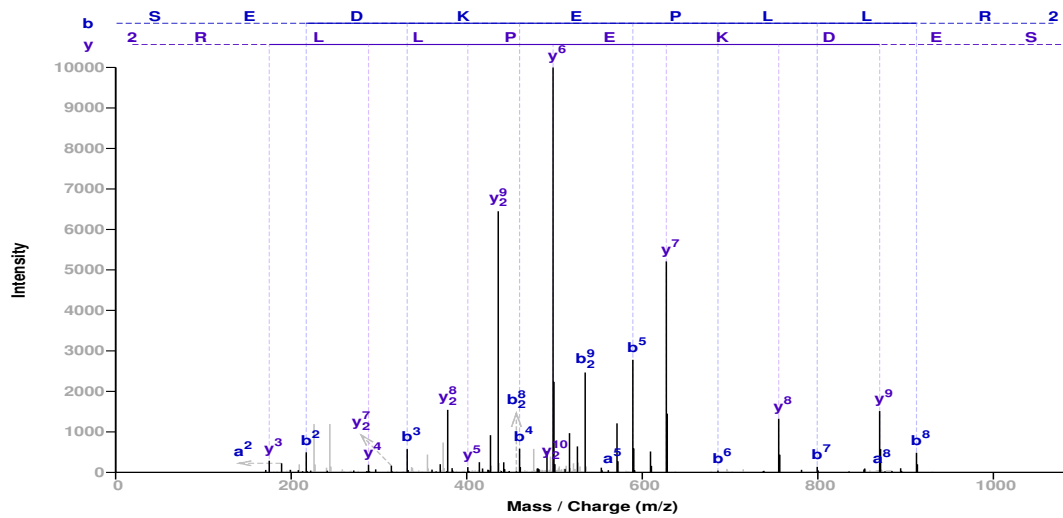

yeast4\_Scan\_Number\_659 Precursor m/z: 430.235 cosine: 0.793  $\alpha$ : 0.466

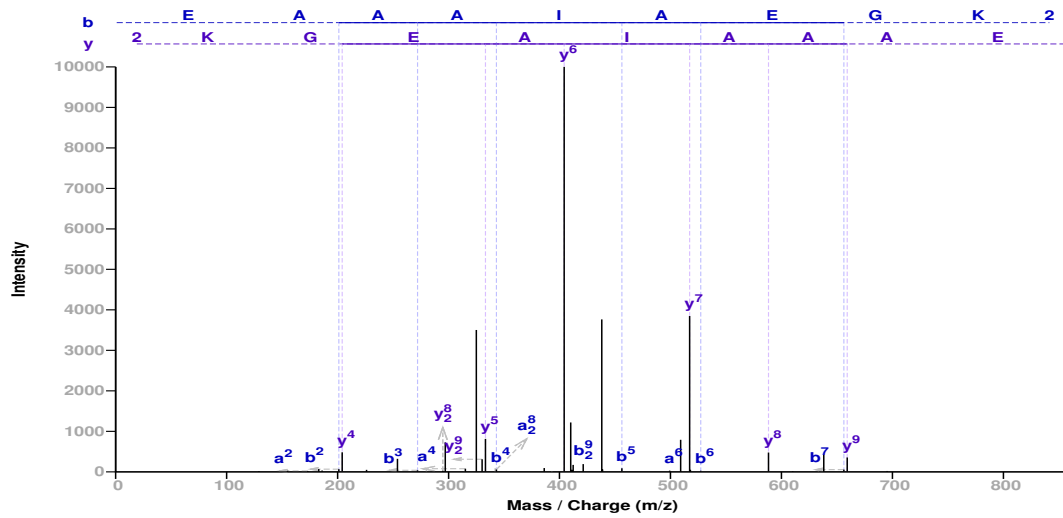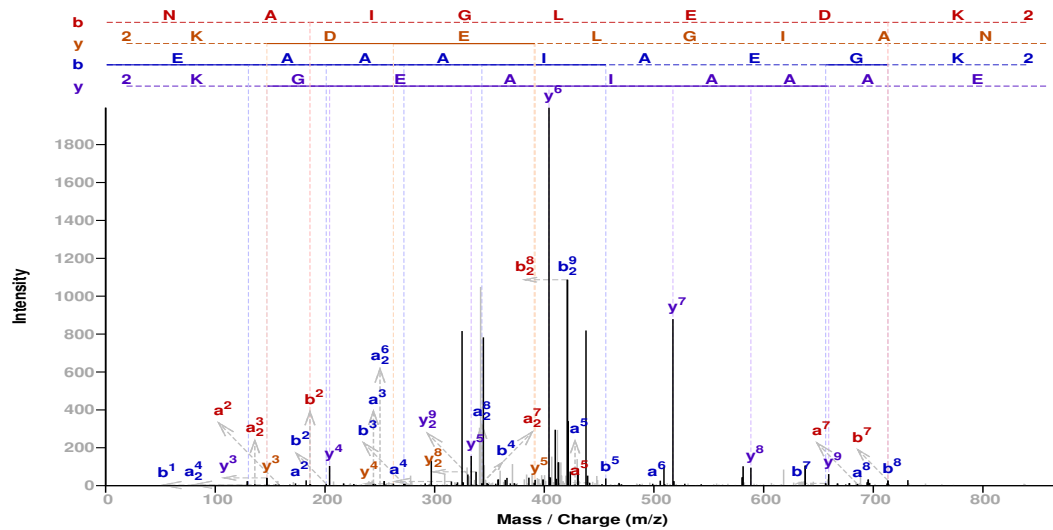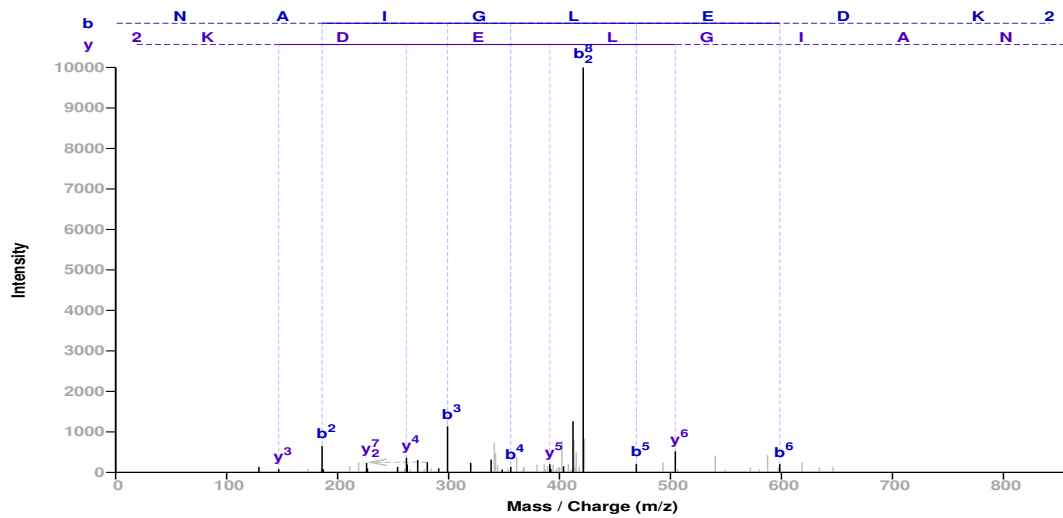

yeast4\_Scan\_Number\_4232 Precursor m/z: 447.594 cosine: 0.738  $\alpha$ : 0.464

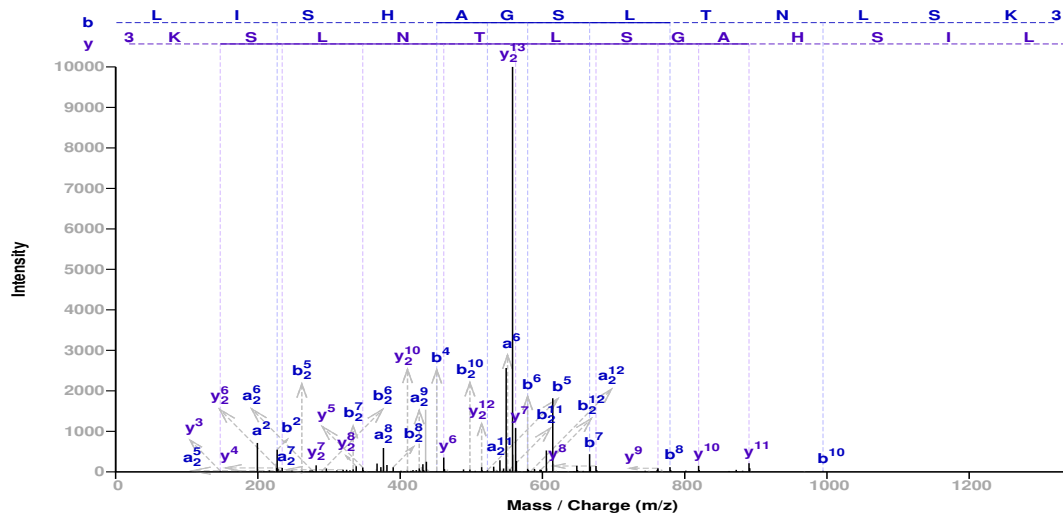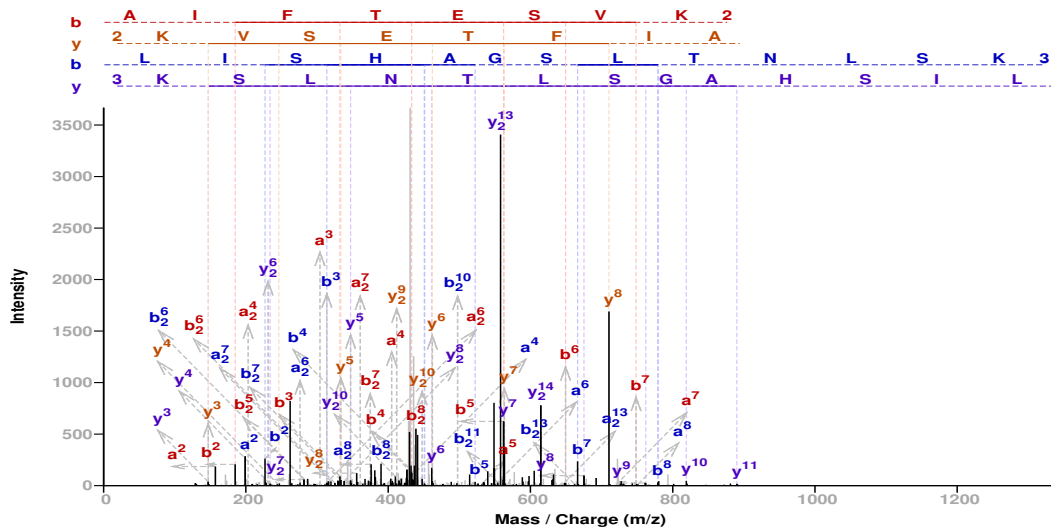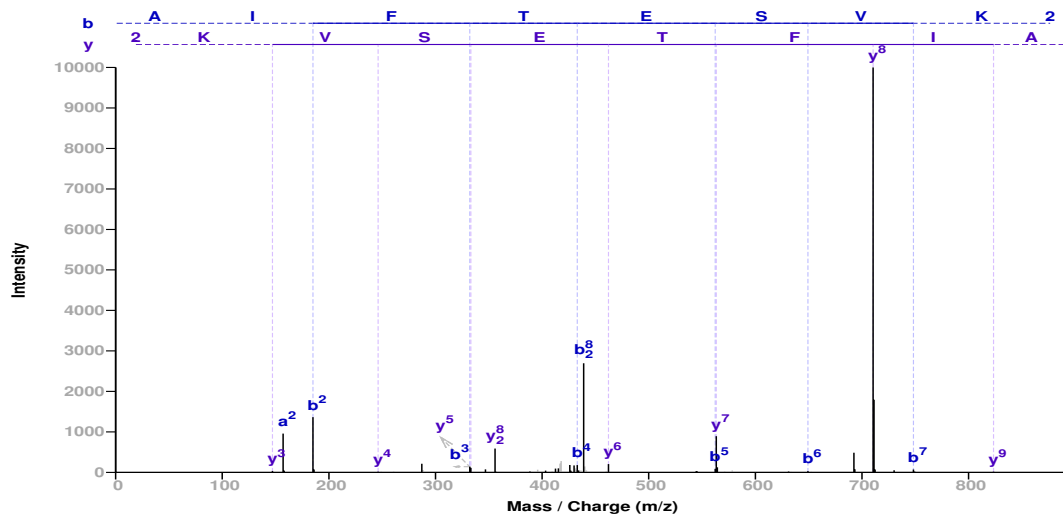

yeast4\_Scan\_Number\_5331 Precursor m/z: 640.842 cosine: 0.751  $\alpha$ : 0.462

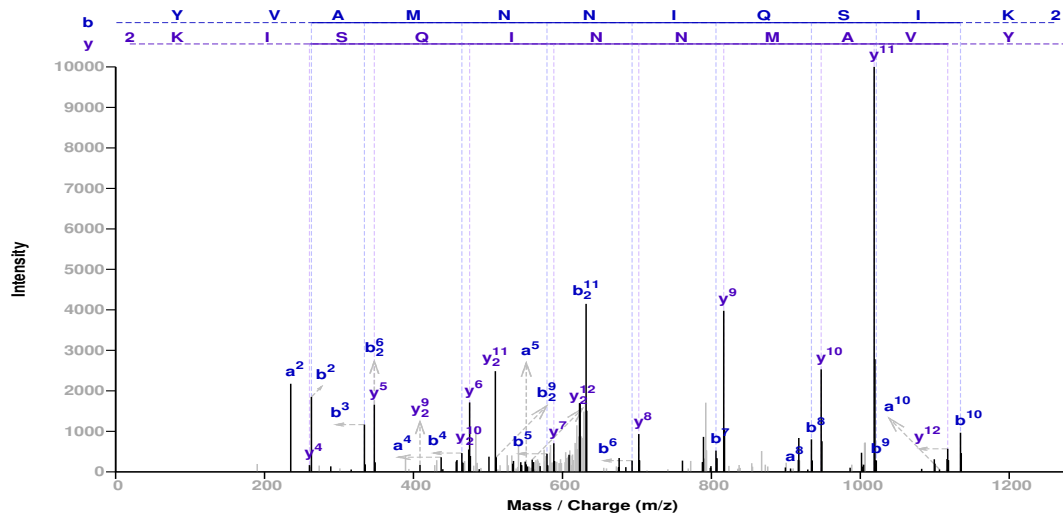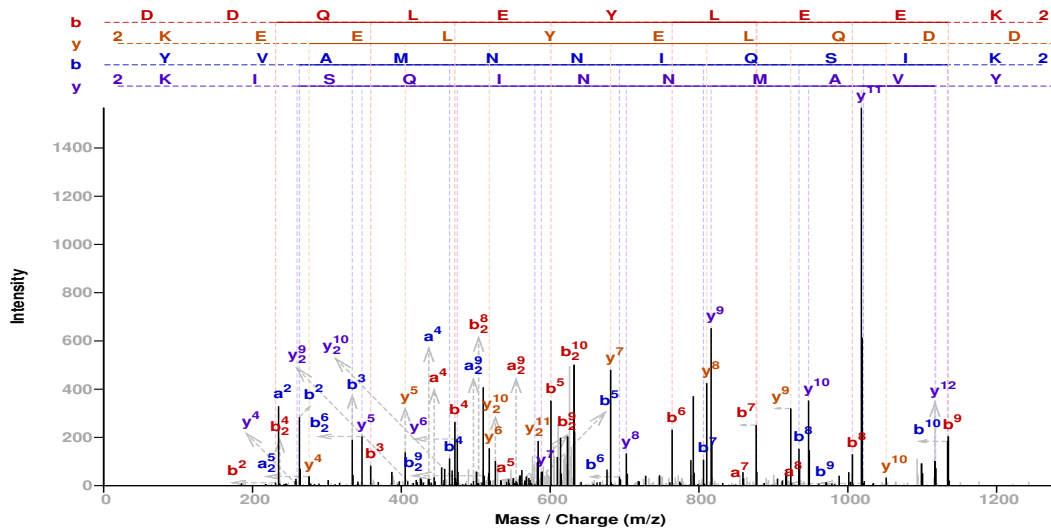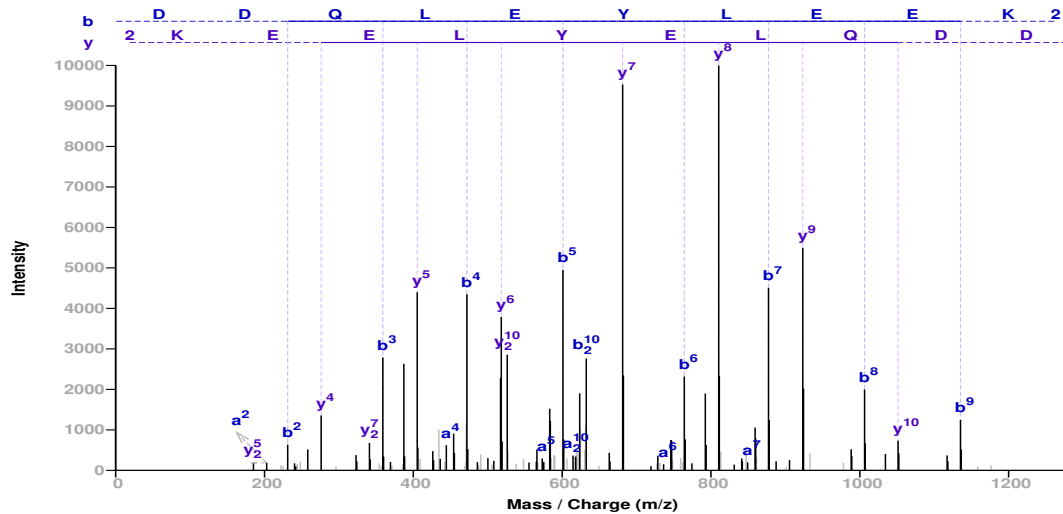

yeast4\_Scan\_Number\_3636 Precursor m/z: 518.782 cosine: 0.786  $\alpha$ : 0.457

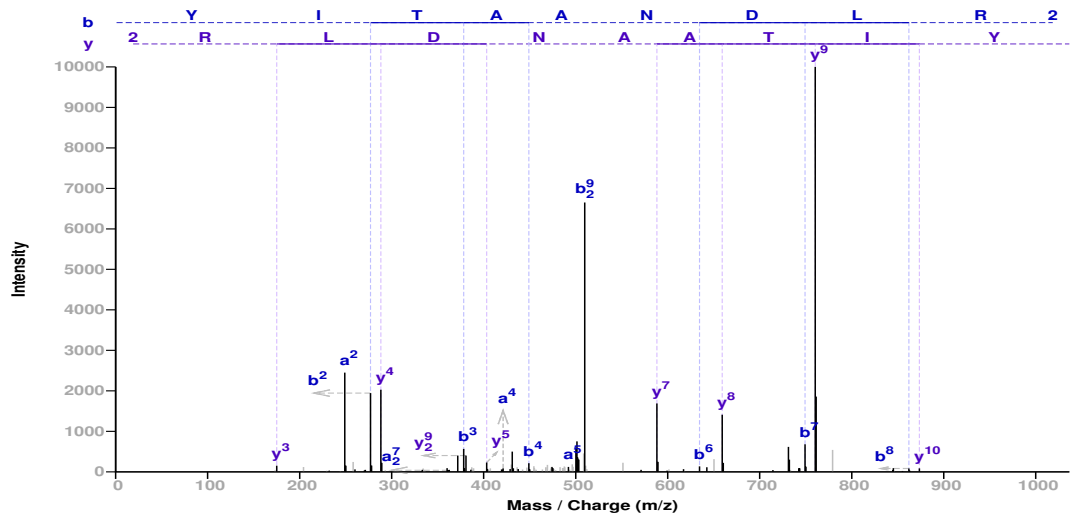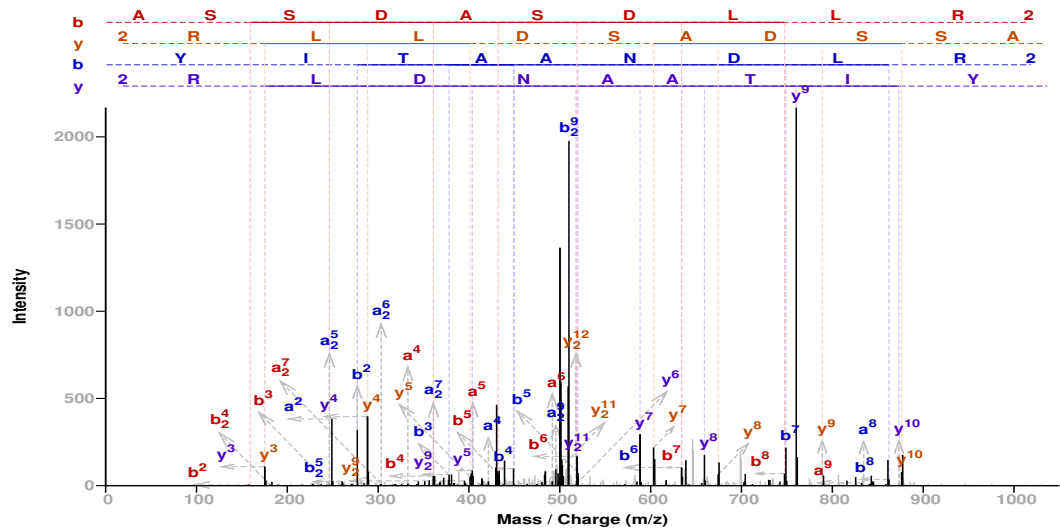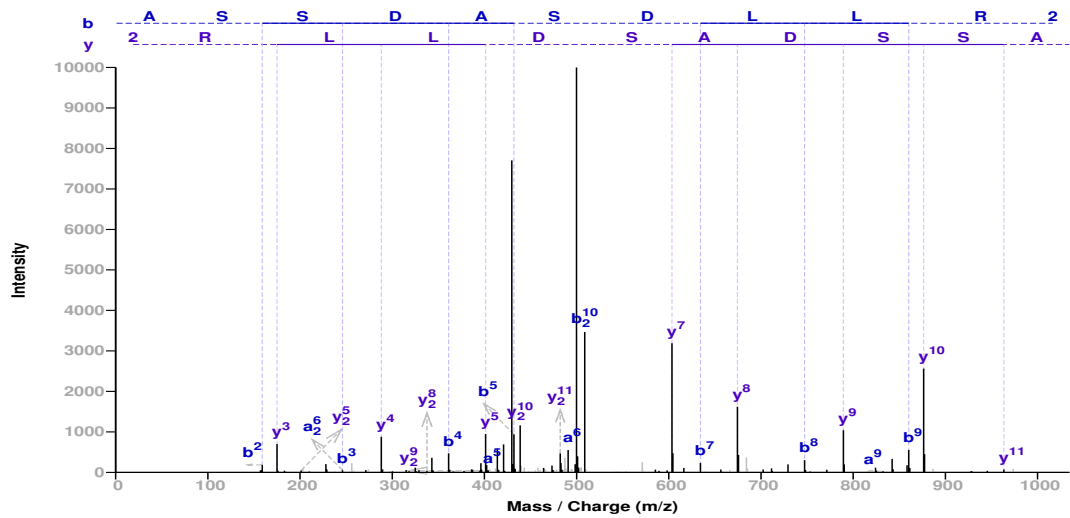

yeast4\_Scan\_Number\_3977 Precursor m/z: 472.756 cosine: 0.797  $\alpha$ : 0.446

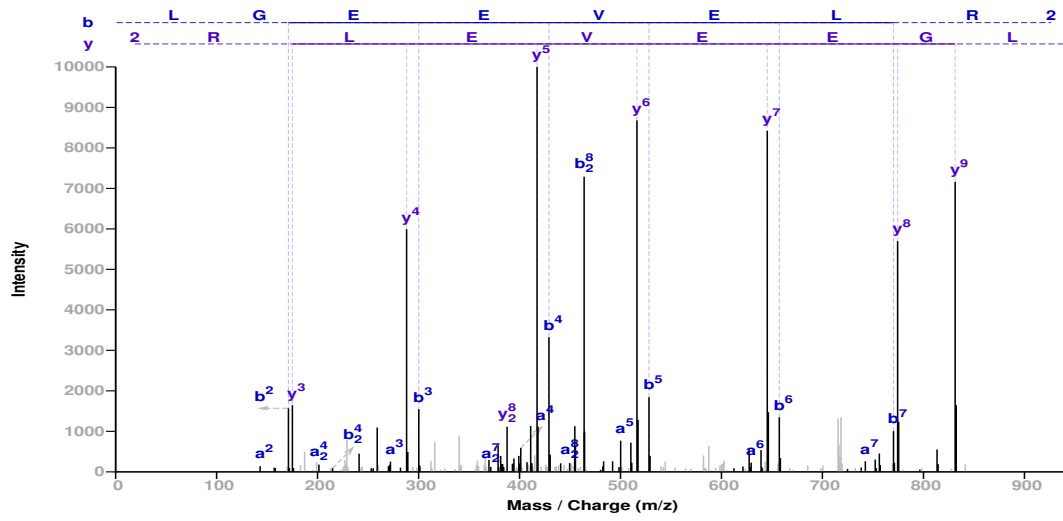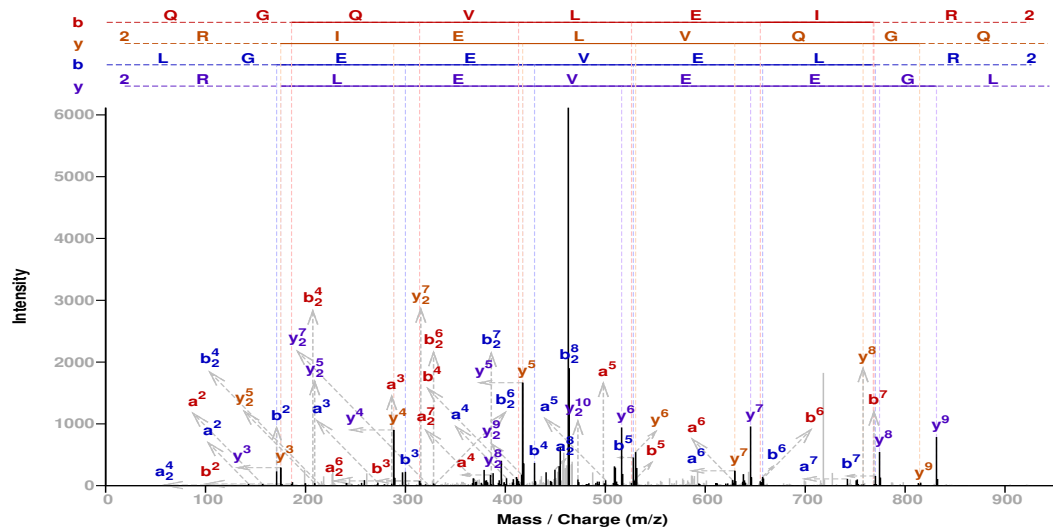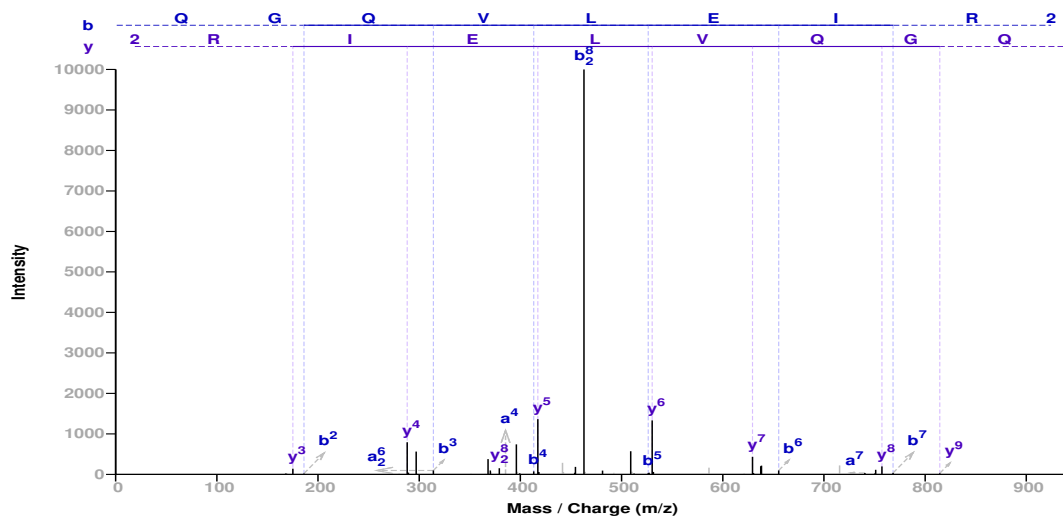

yeast4\_Scan\_Number\_3750 Precursor m/z: 478.258 cosine: 0.796  $\alpha$ : 0.446

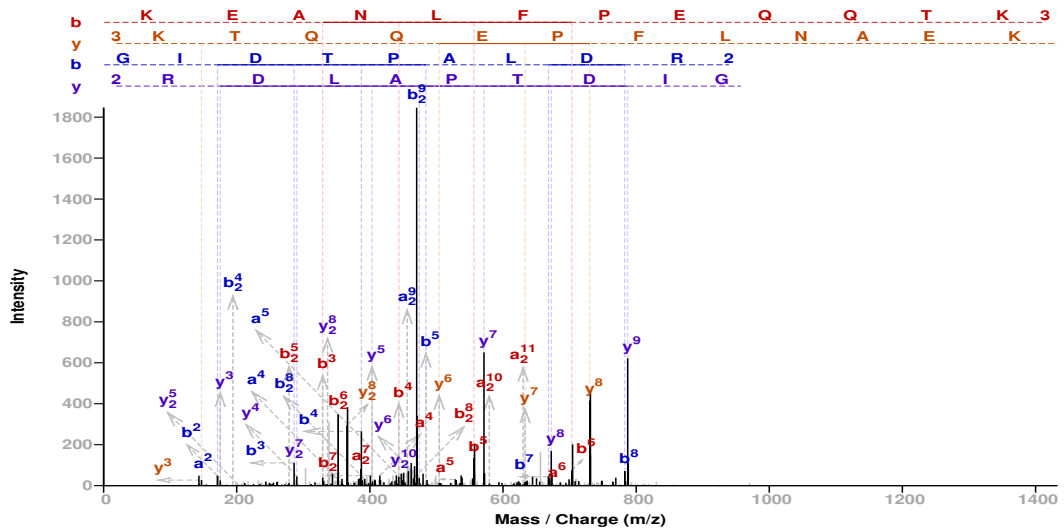



yeast4\_Scan\_Number\_3965 Precursor m/z: 609.832 cosine: 0.762  $\alpha$ : 0.443

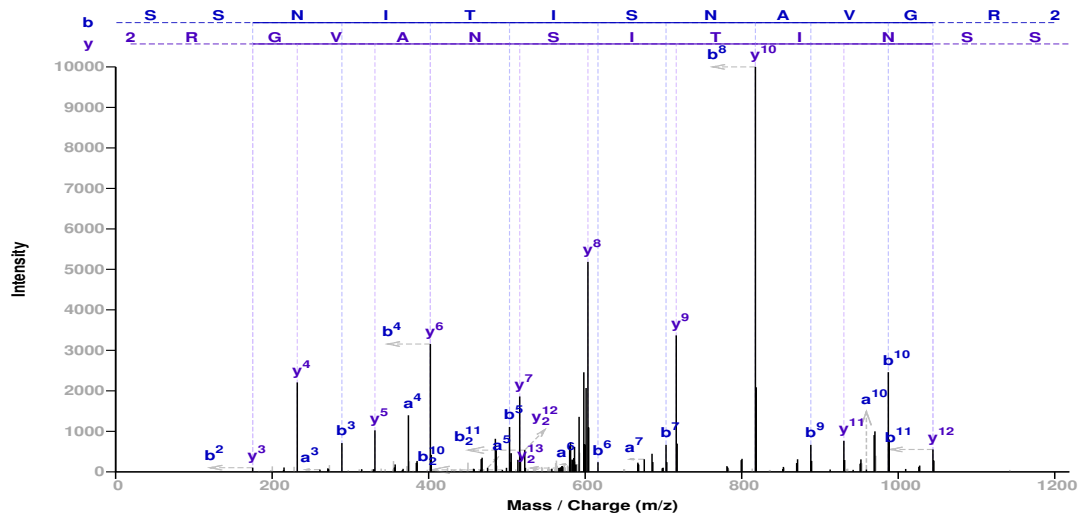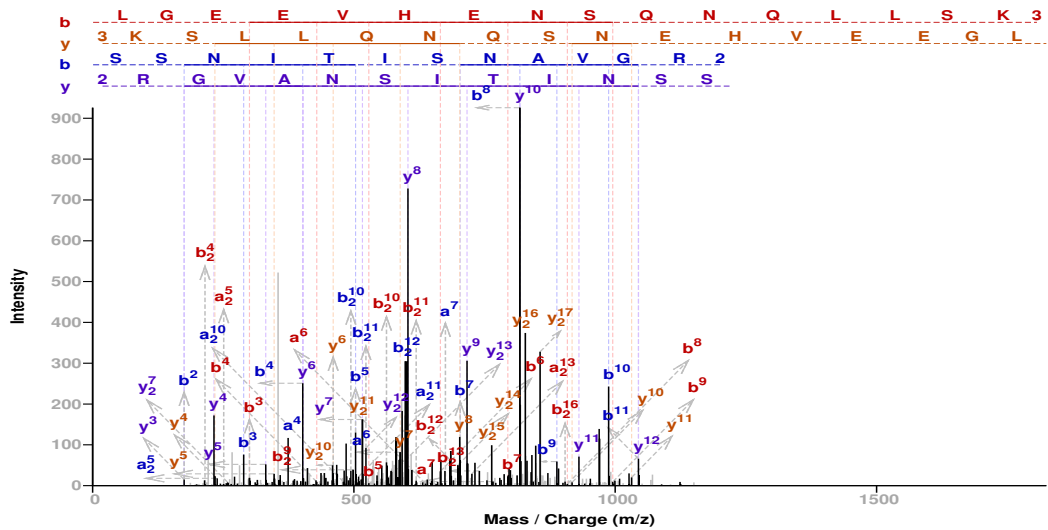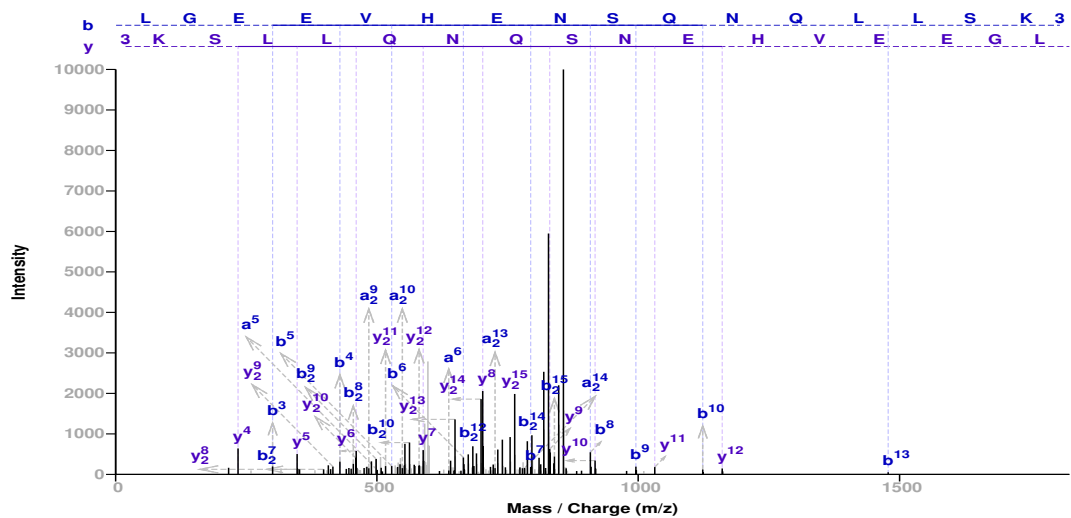

yeast4\_Scan\_Number\_7768 Precursor m/z: 651.373 cosine: 0.858  $\alpha$ : 0.442

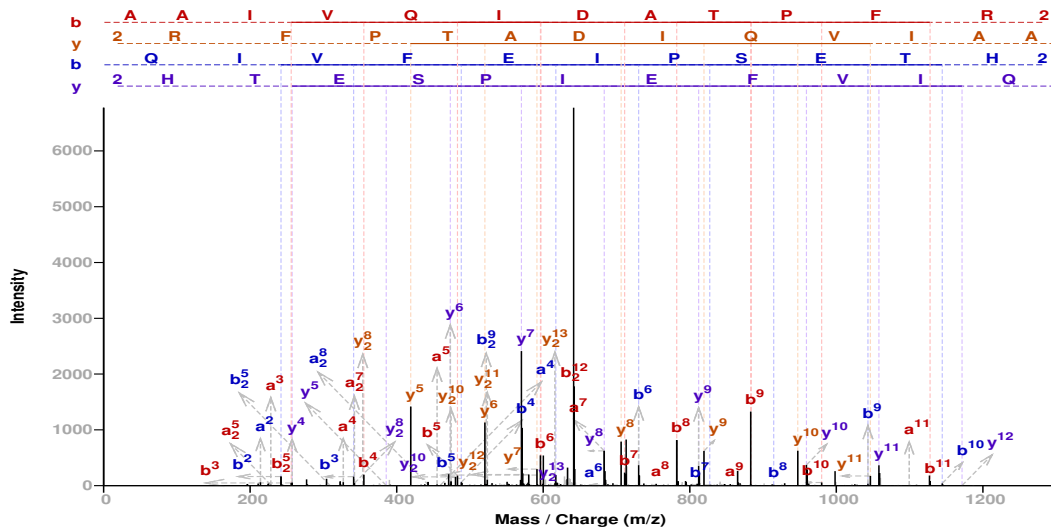

yeast4.Scan\_Number.1728 Precursor m/z: 502.760 cosine: 0.804  $\alpha$ : 0.434

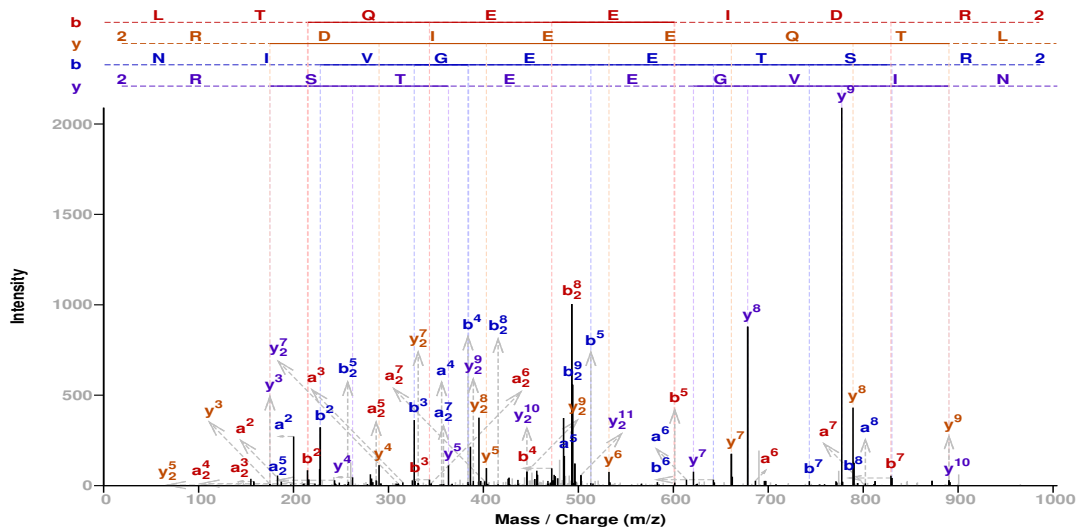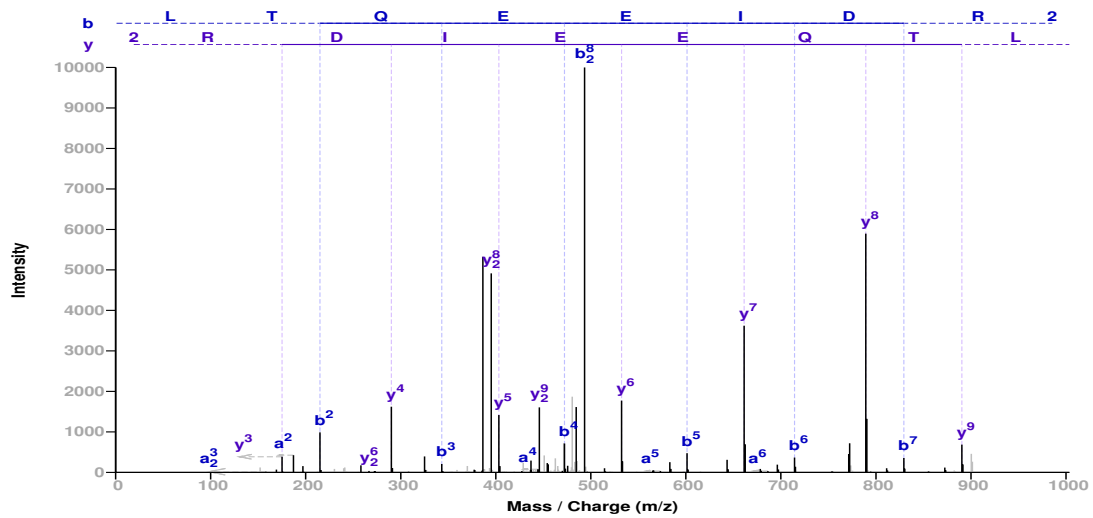

yeast4\_Scan\_Number\_4565 Precursor m/z: 485.289 cosine: 0.758  $\alpha$ : 0.433

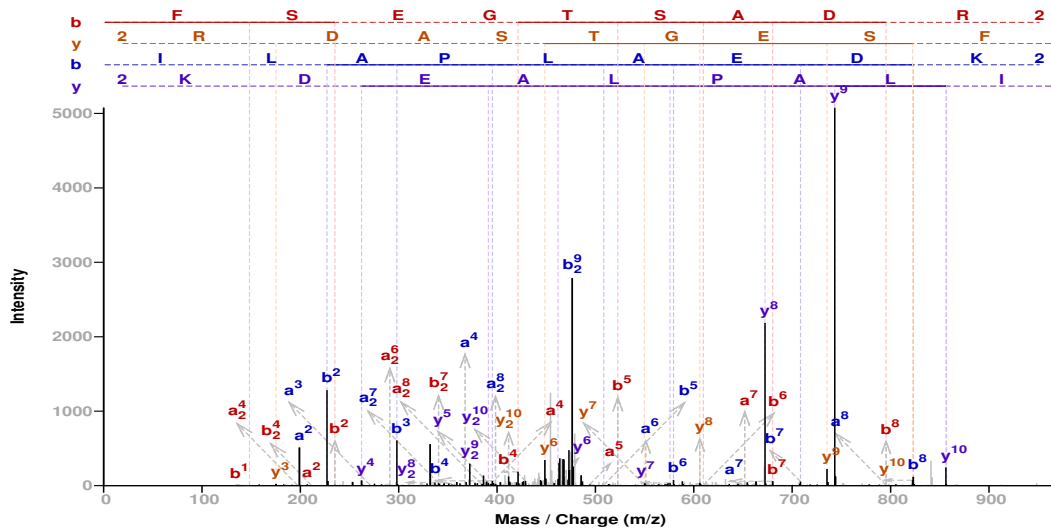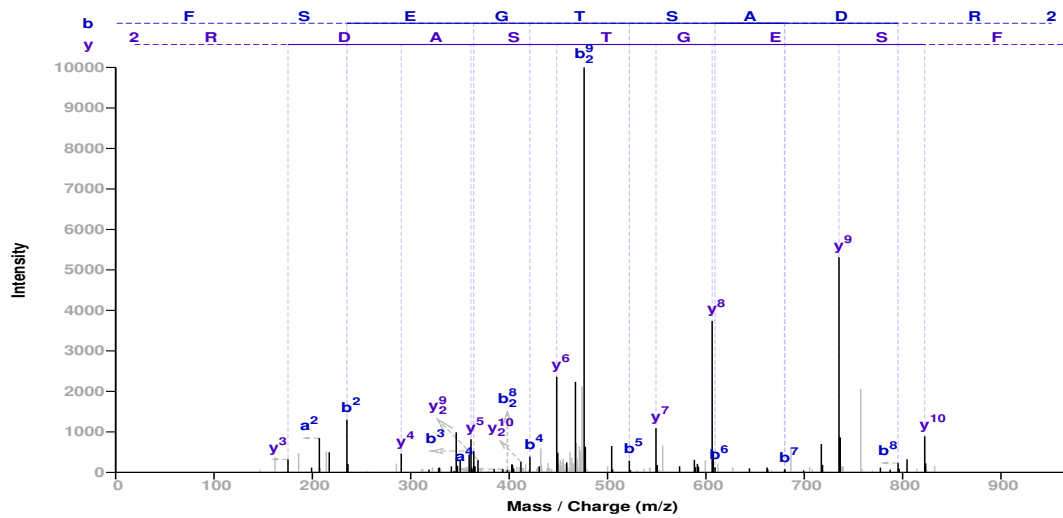

yeast4\_Scan\_Number\_1929 Precursor m/z: 611.306 cosine: 0.770  $\alpha$ : 0.417

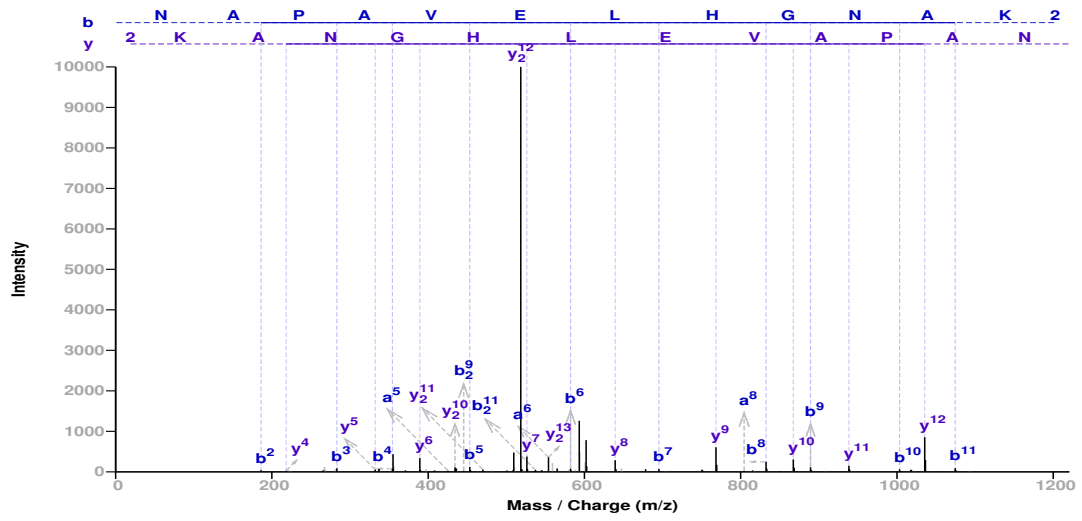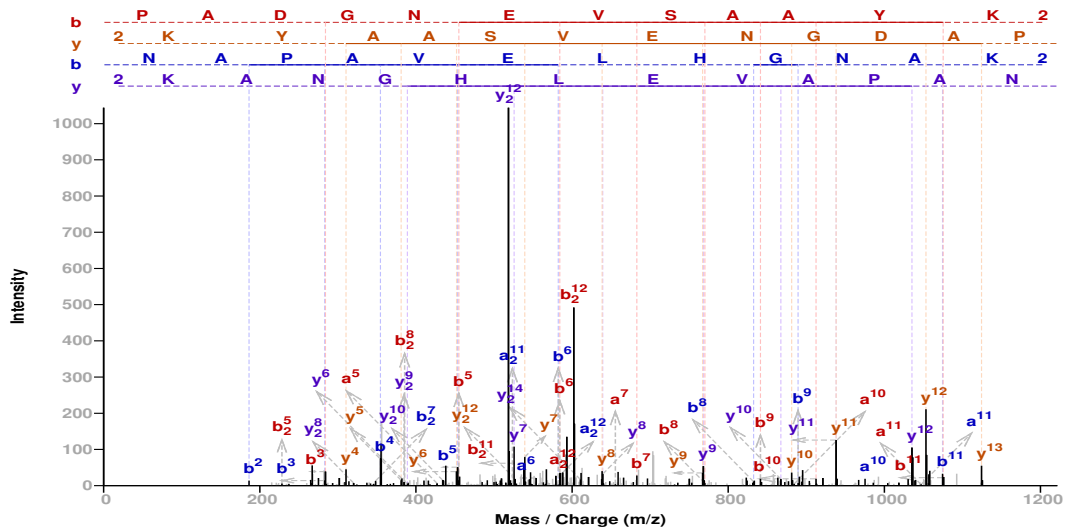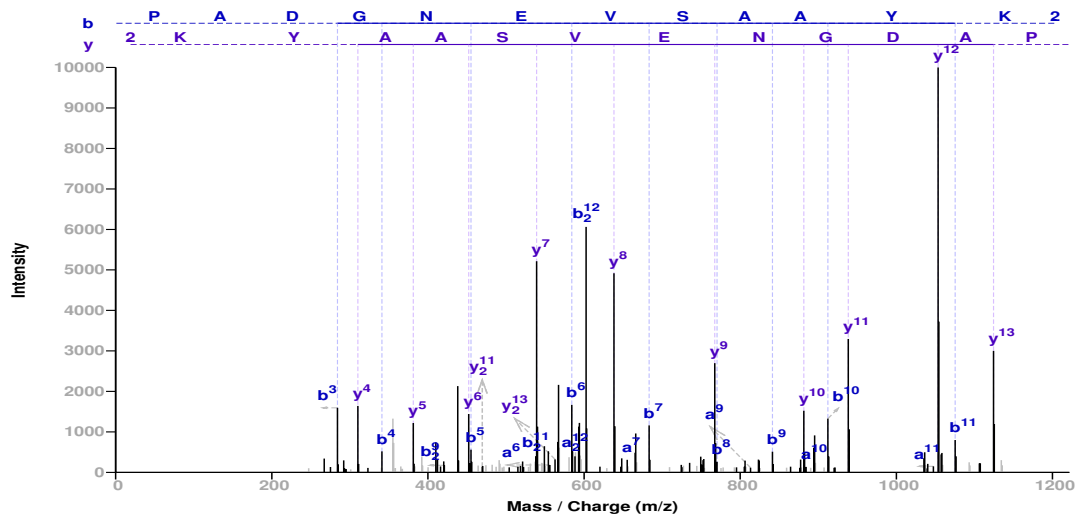

yeast4\_Scan\_Number\_2514 Precursor m/z: 562.833 cosine: 0.776  $\alpha$ : 0.415

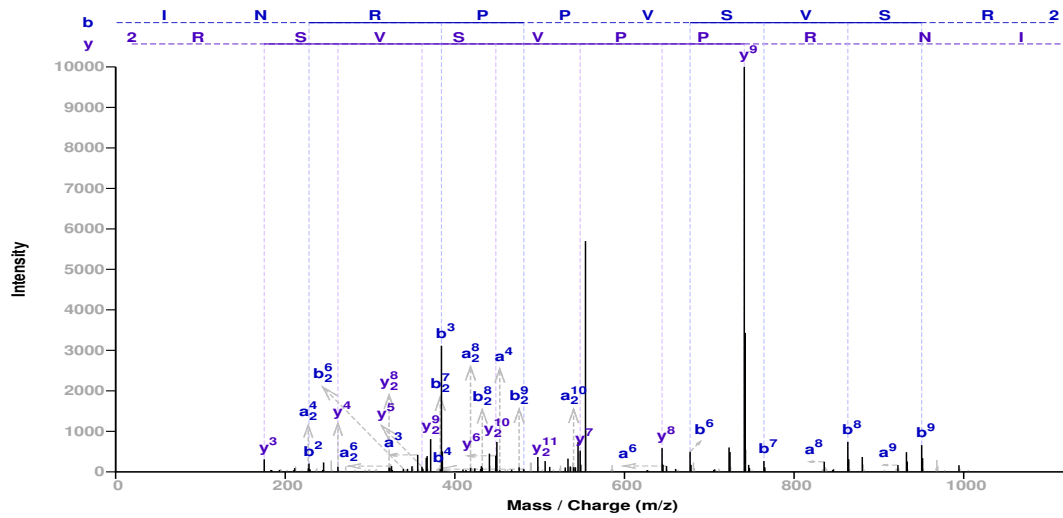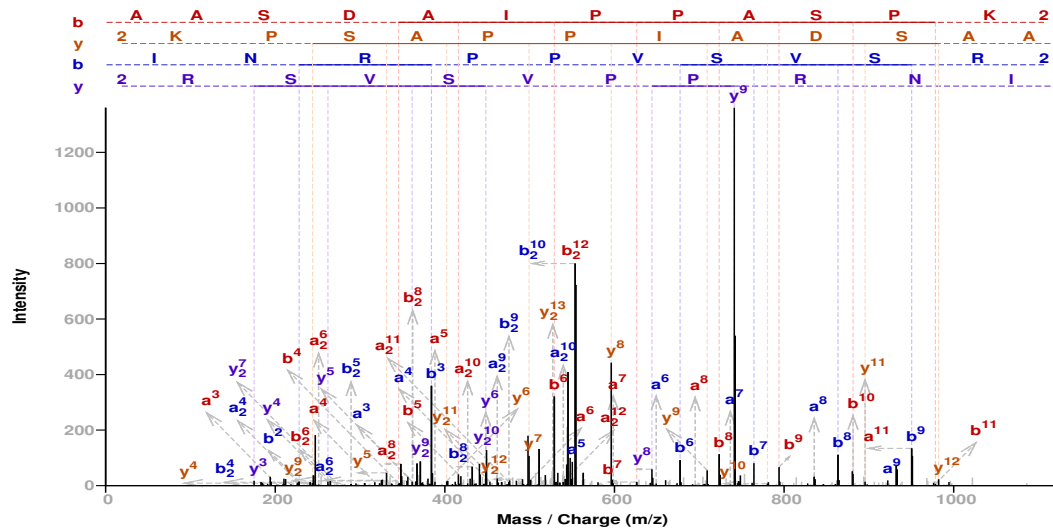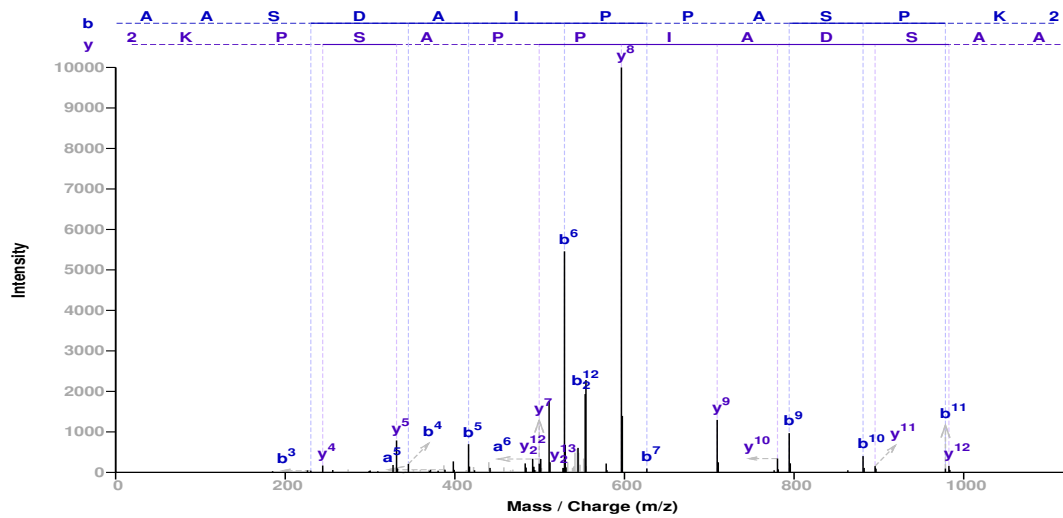



yeast4\_Scan\_Number\_895 Precursor m/z: 459.245 cosine: 0.759  $\alpha$ : 0.405

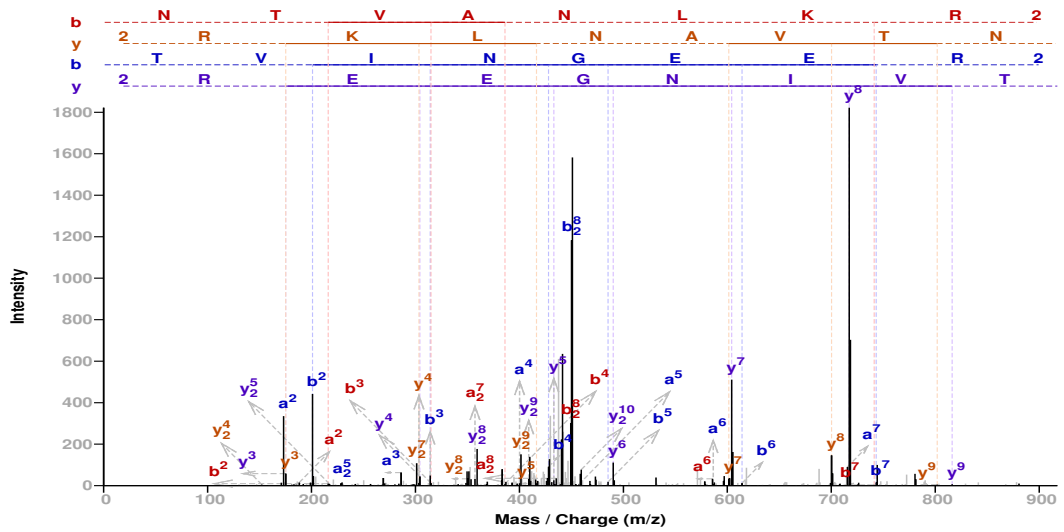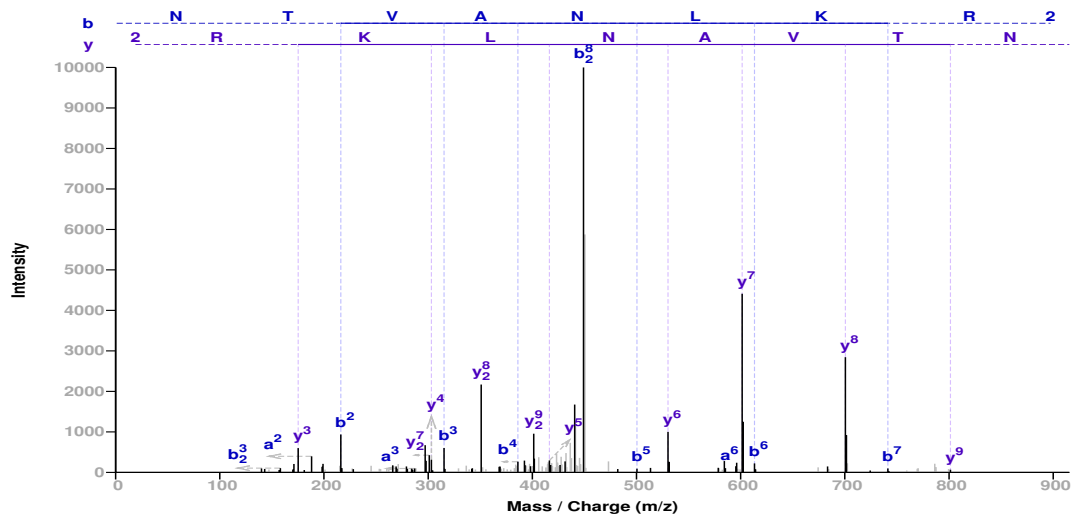



yeast4\_Scan\_Number\_6658 Precursor m/z: 541.306 cosine: 0.774  $\alpha$ : 0.396

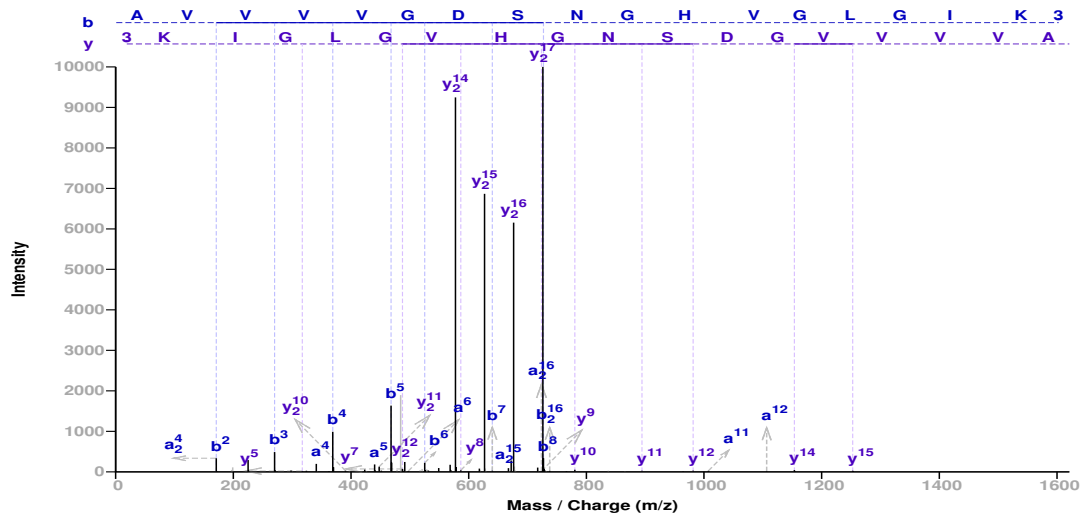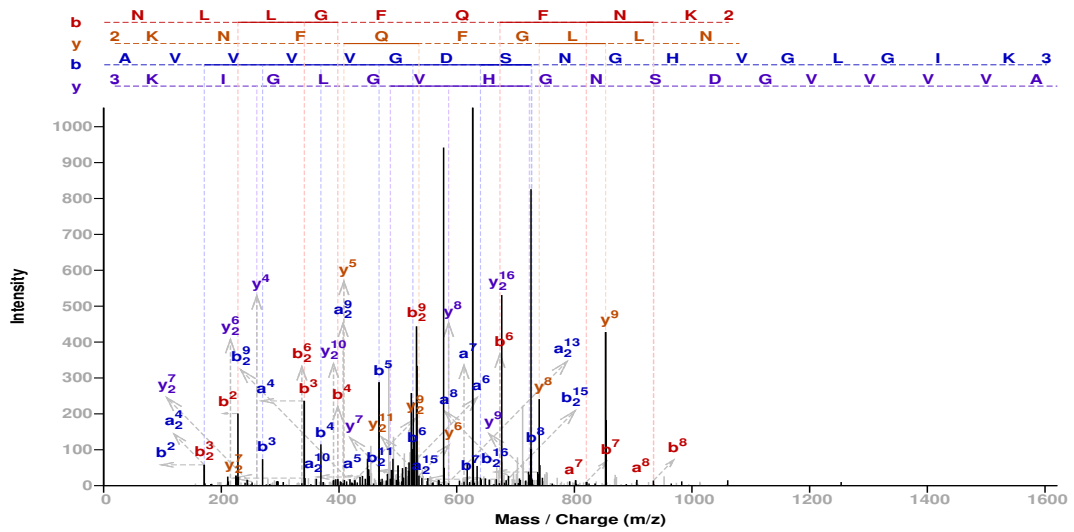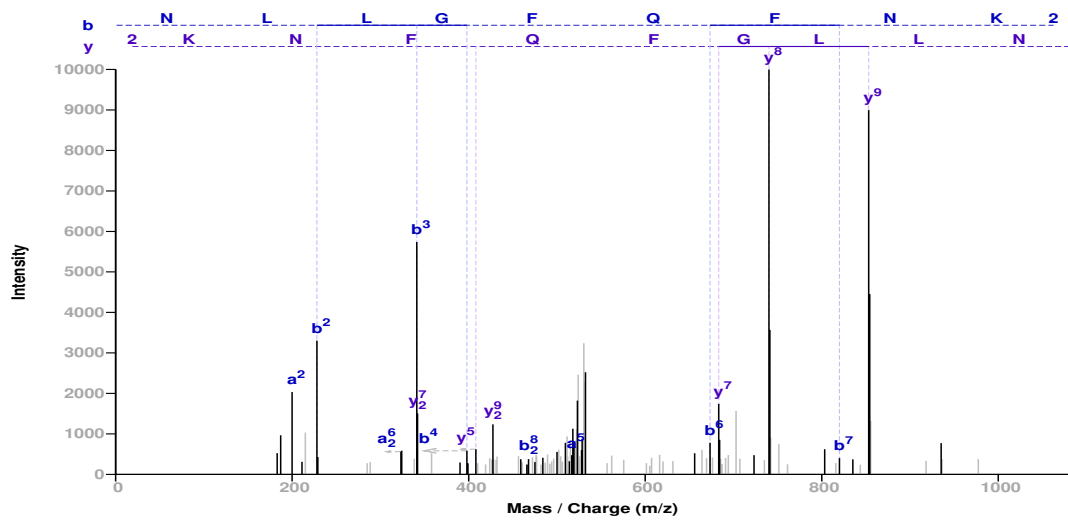

yeast4\_Scan\_Number\_6537 Precursor m/z: 658.027 cosine: 0.805  $\alpha$ : 0.388

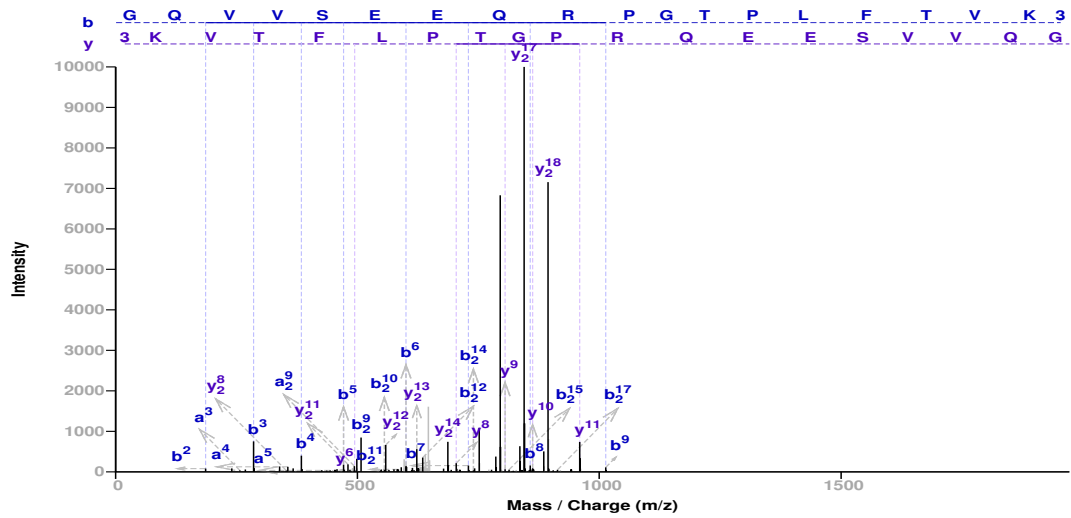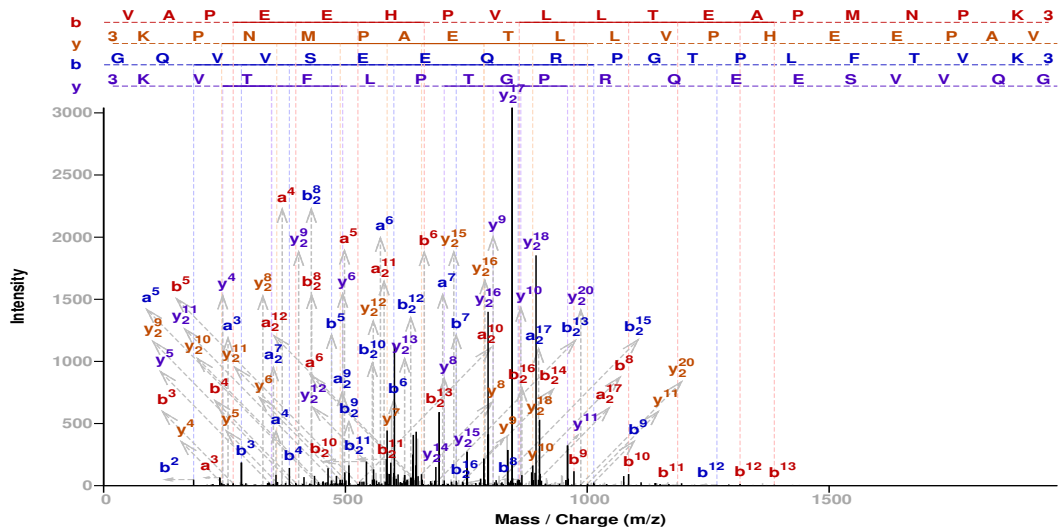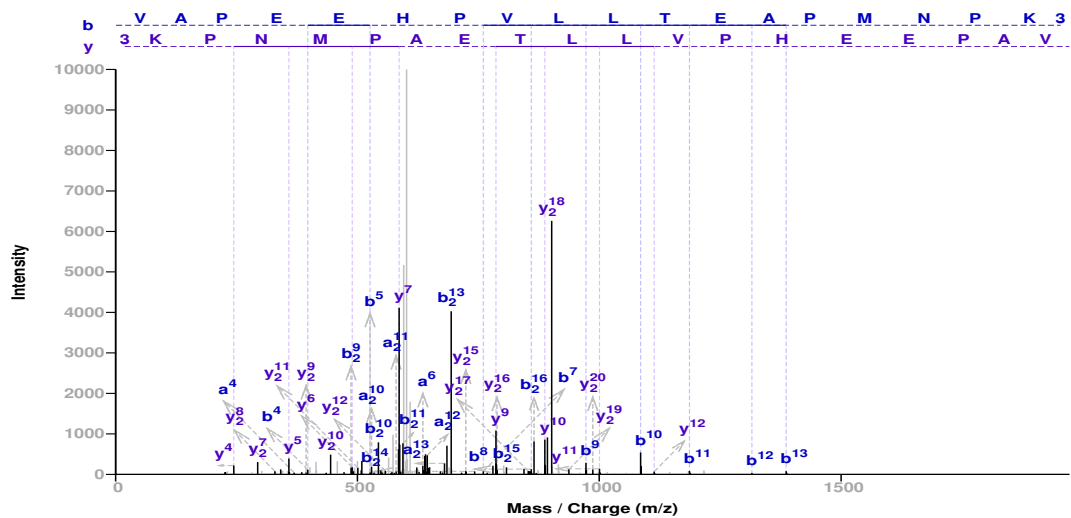

yeast4\_Scan\_Number\_4581 Precursor m/z: 453.732 cosine: 0.759  $\alpha$ : 0.386

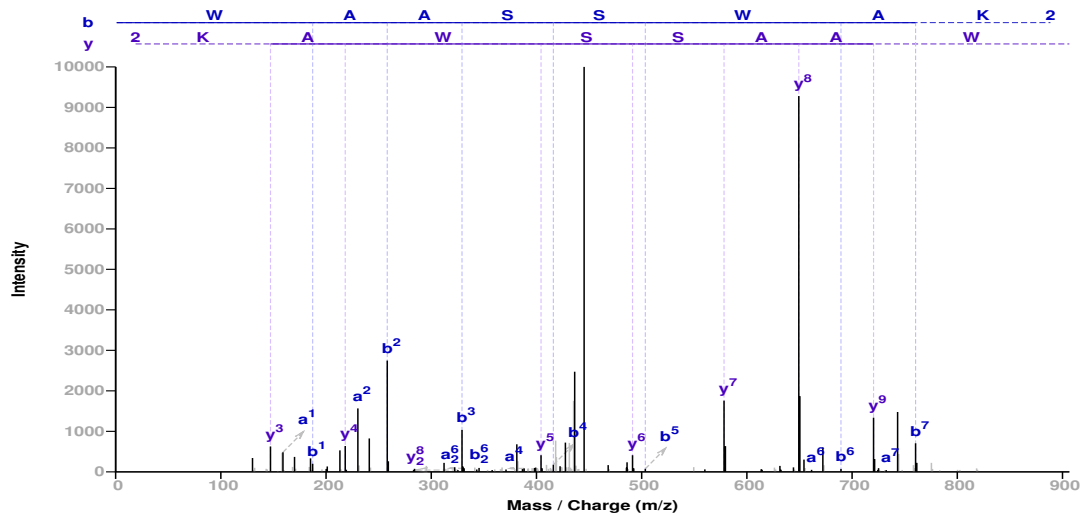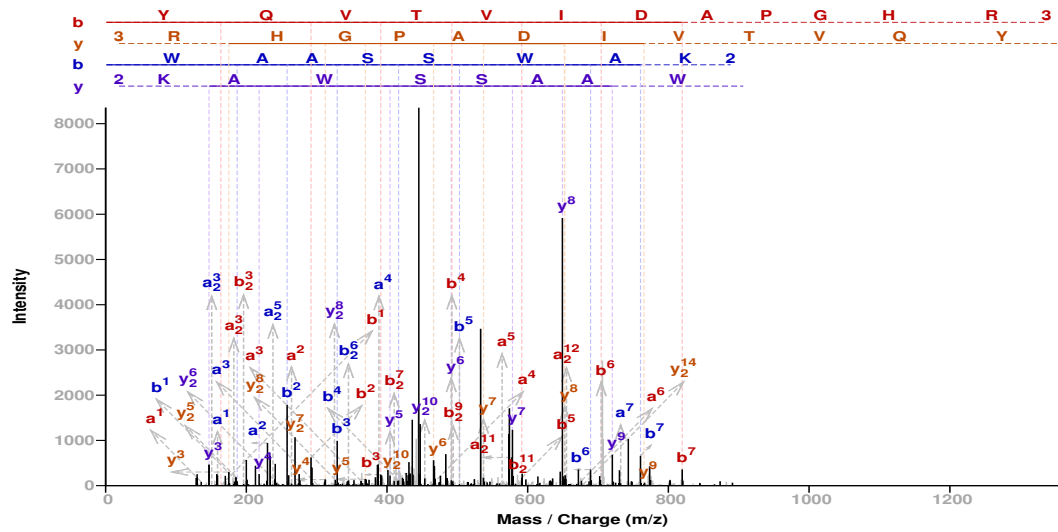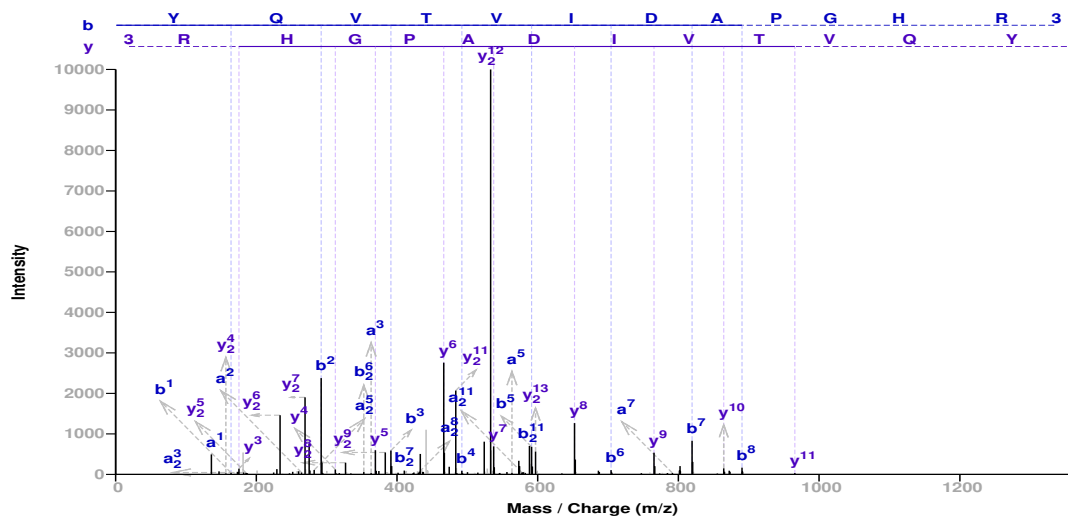

yeast4\_Scan\_Number\_3474 Precursor m/z: 571.303 cosine: 0.758  $\alpha$ : 0.378

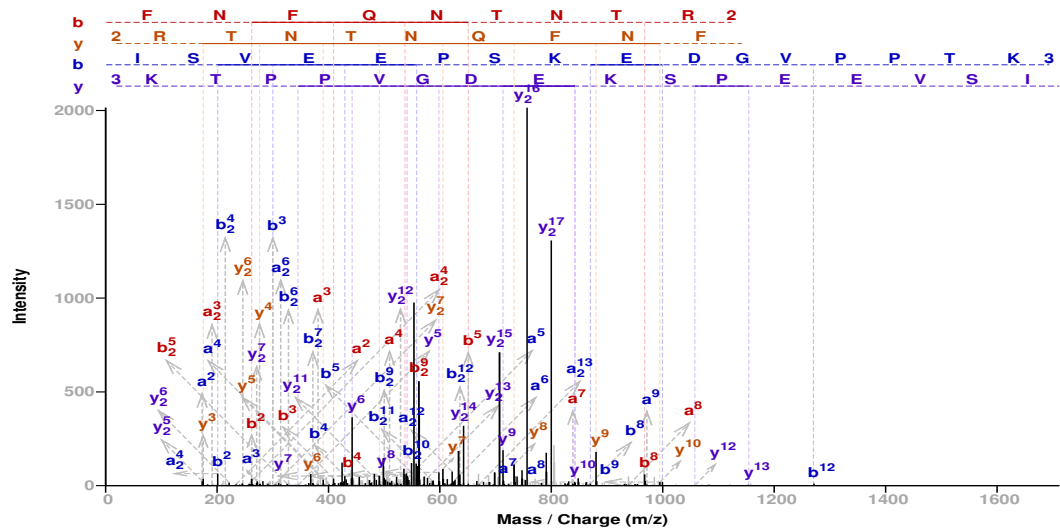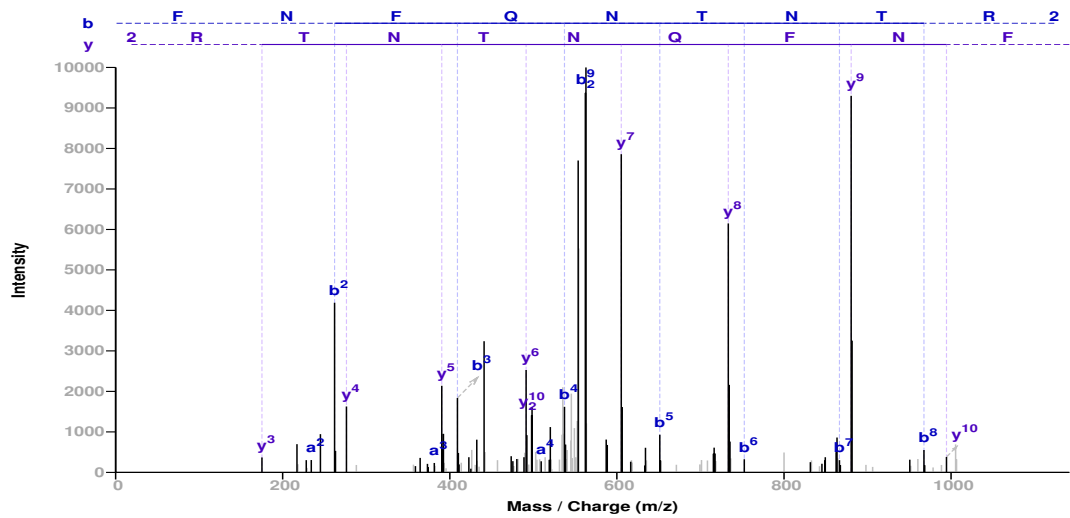

yeast4.Scan\_Number\_4930 Precursor m/z: 505.758 cosine: 0.775  $\alpha$ : 0.378

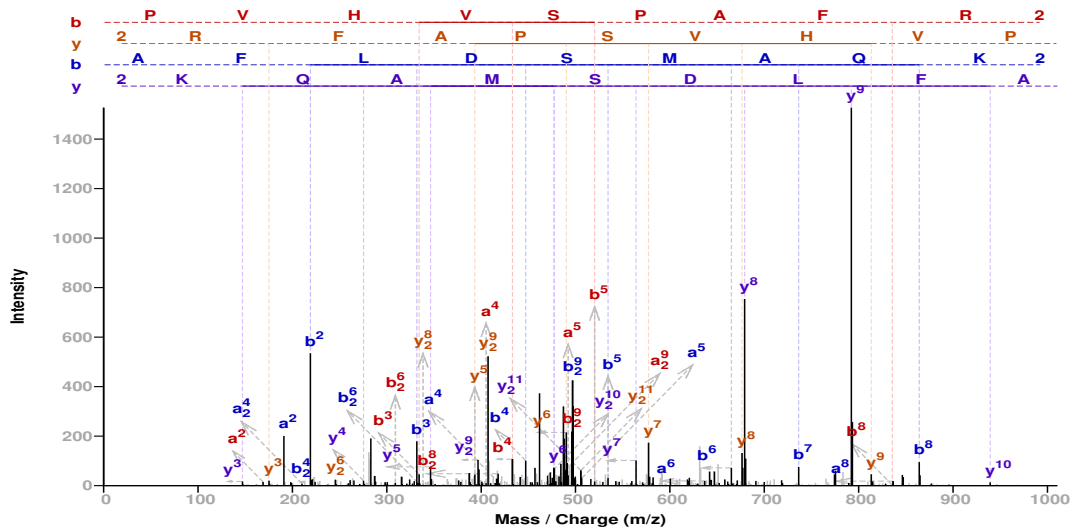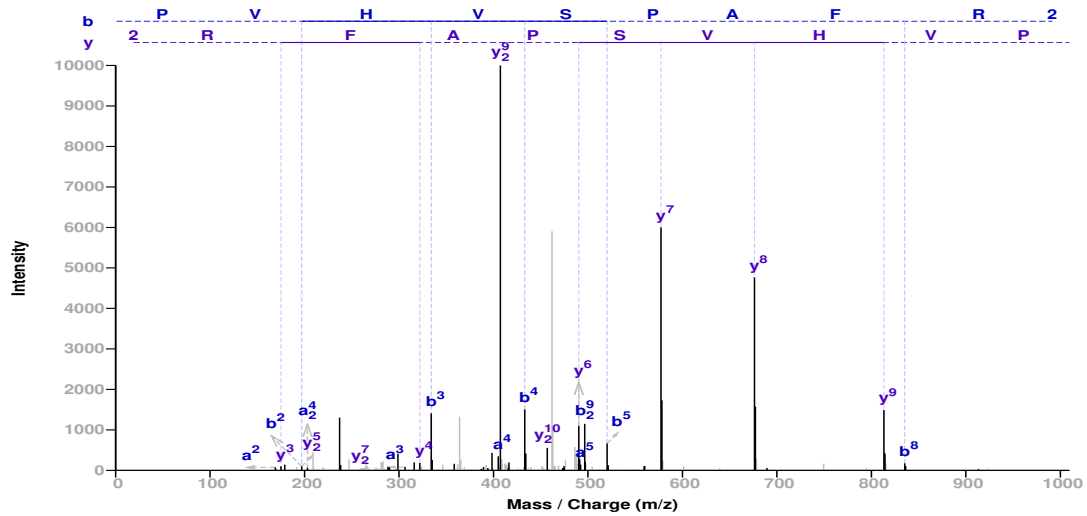

yeast4\_Scan\_Number\_1773 Precursor m/z: 467.745 cosine: 0.893  $\alpha$ : 0.368

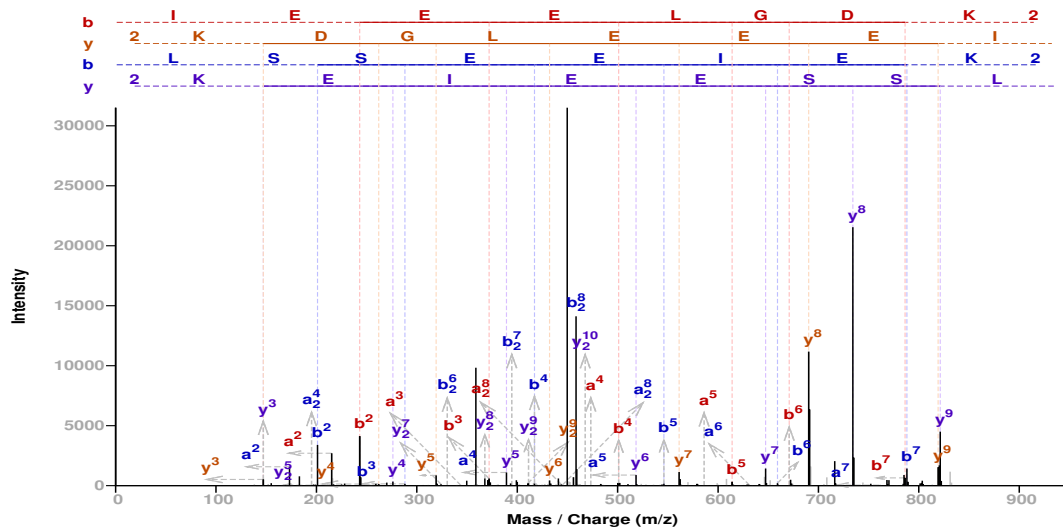

yeast4\_Scan\_Number\_6624 Precursor m/z: 639.346 cosine: 0.804  $\alpha$ : 0.359

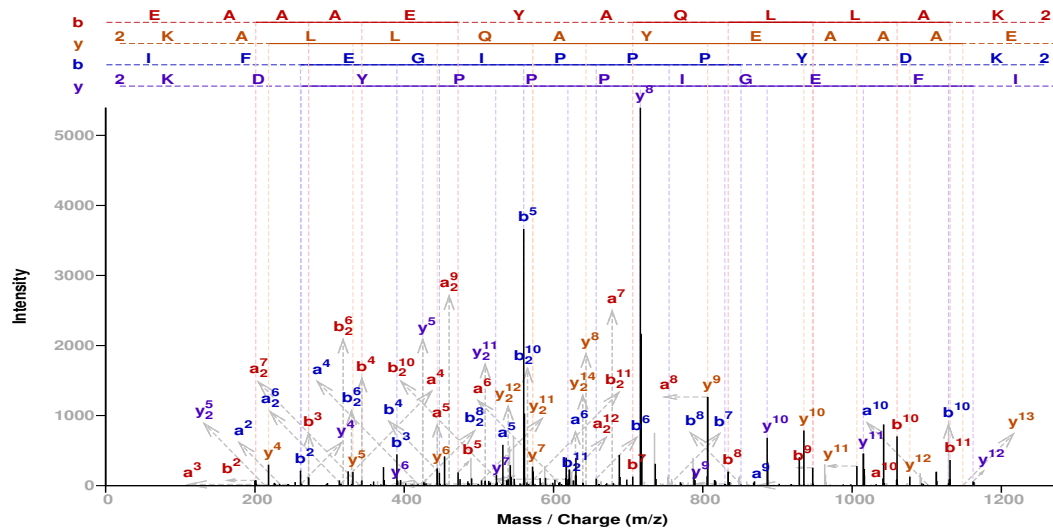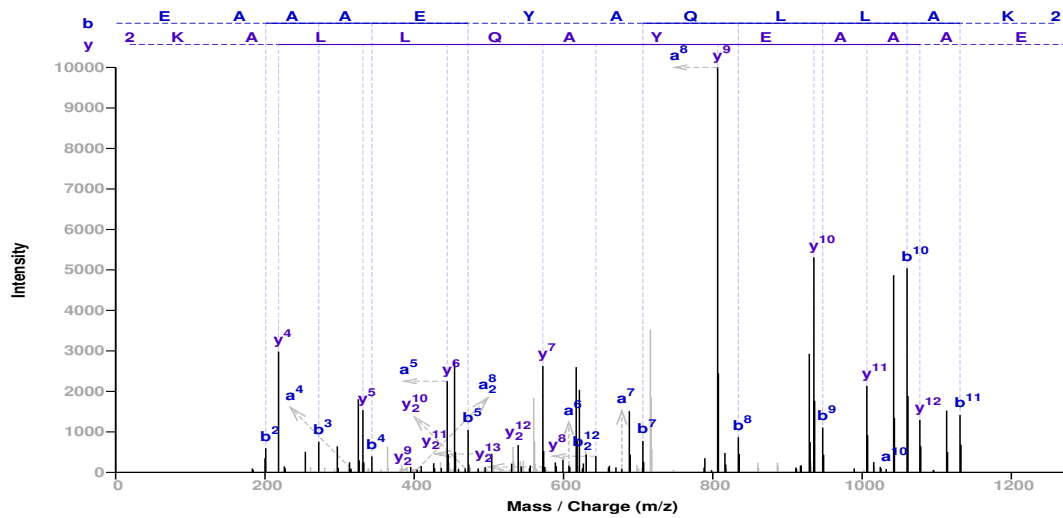

yeast4.Scan\_Number.2625 Precursor m/z: 394.236 cosine: 0.791  $\alpha$ : 0.357

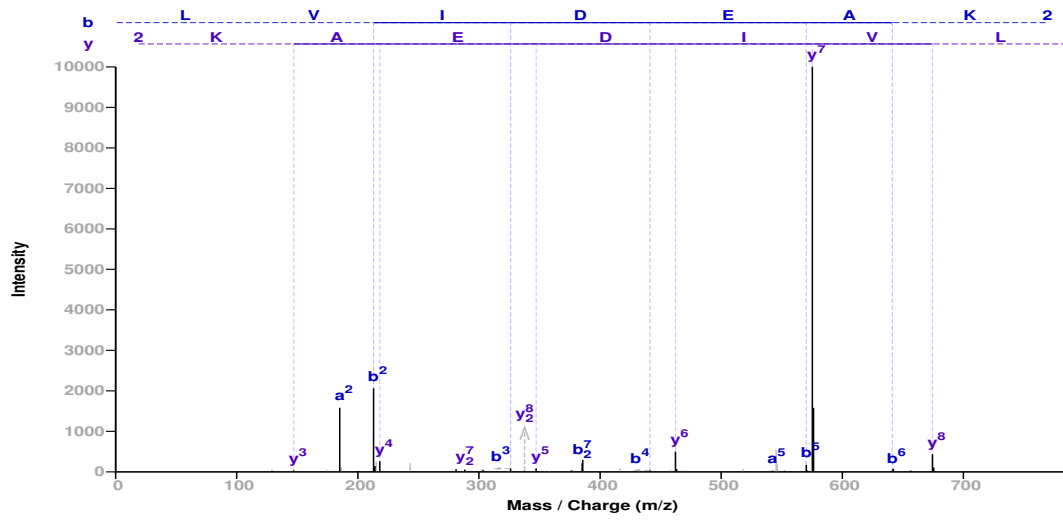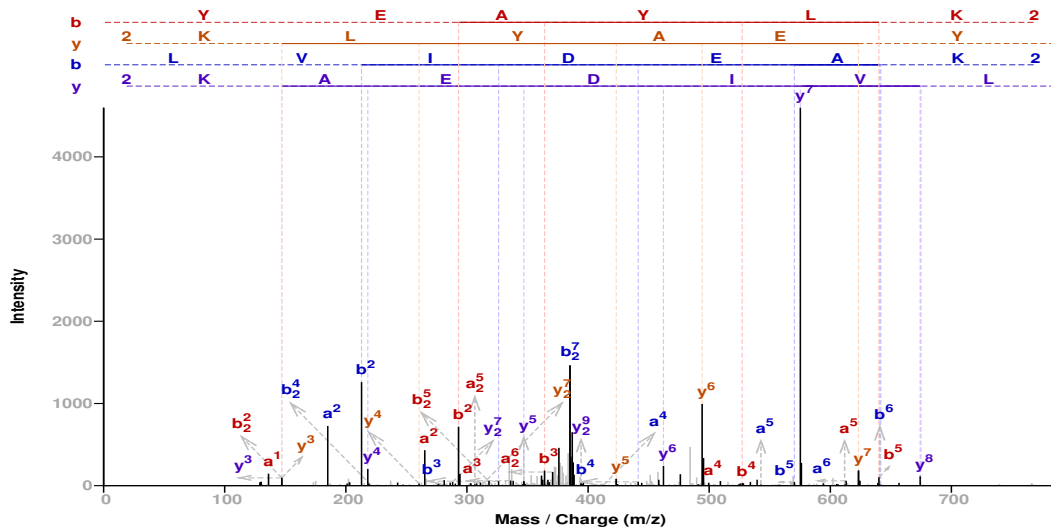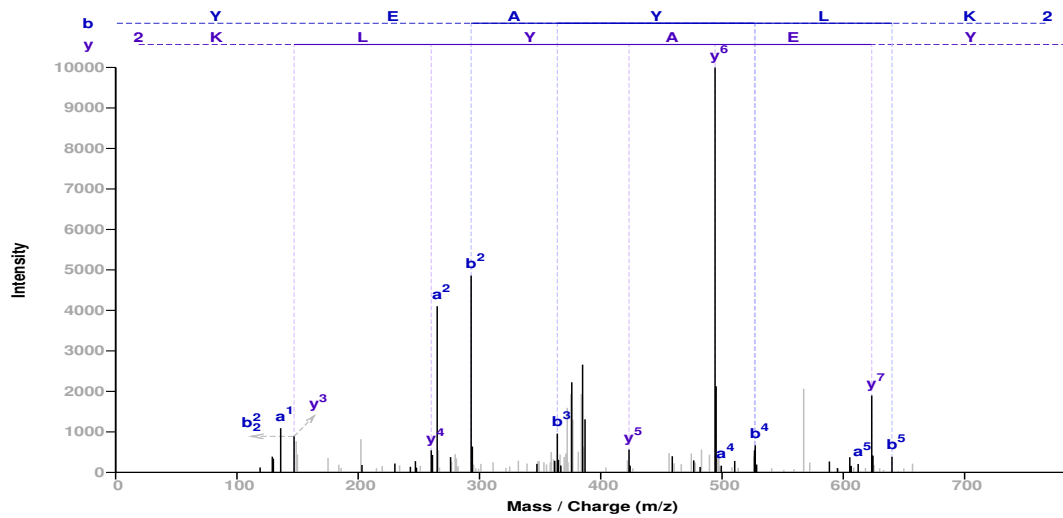



yeast4\_Scan\_Number\_6999 Precursor m/z: 735.398 cosine: 0.833  $\alpha$ : 0.346

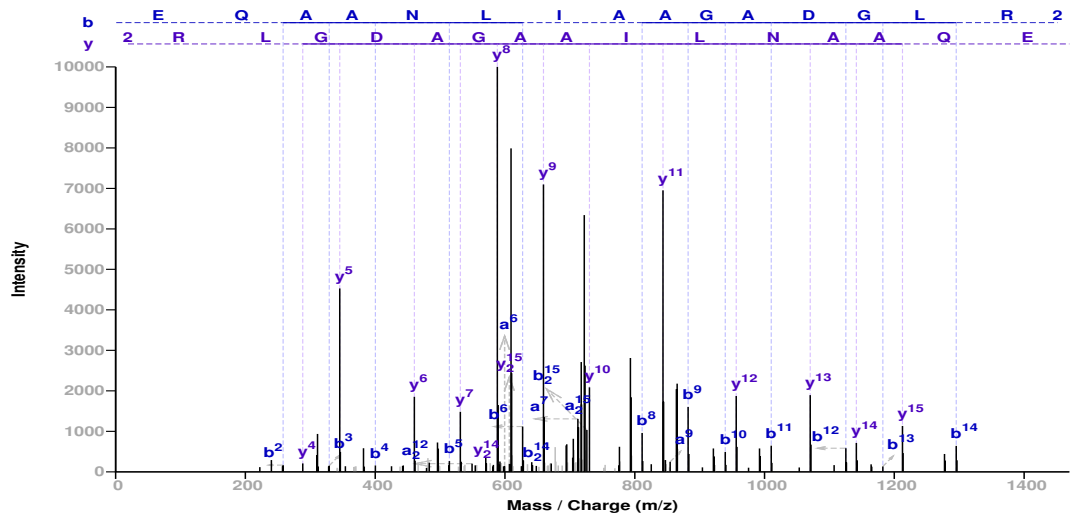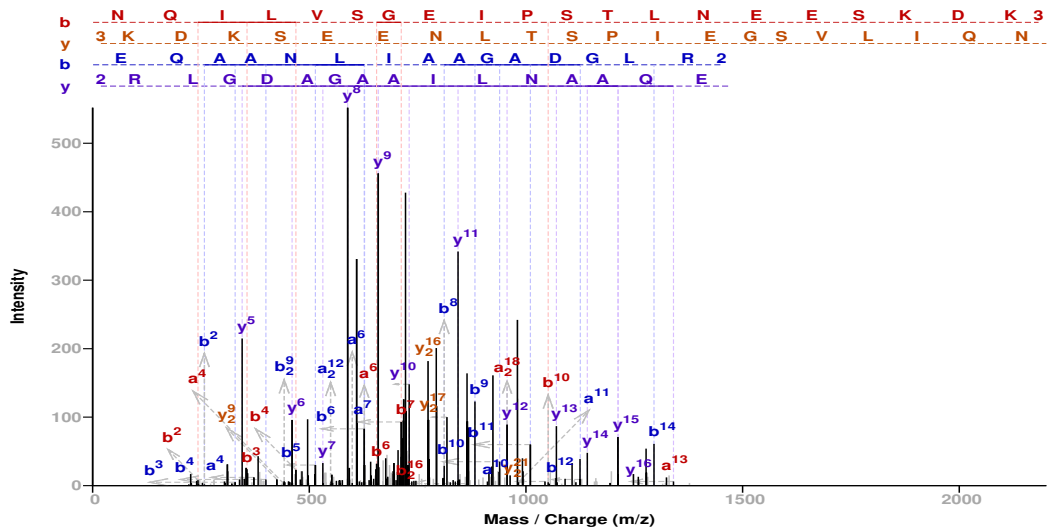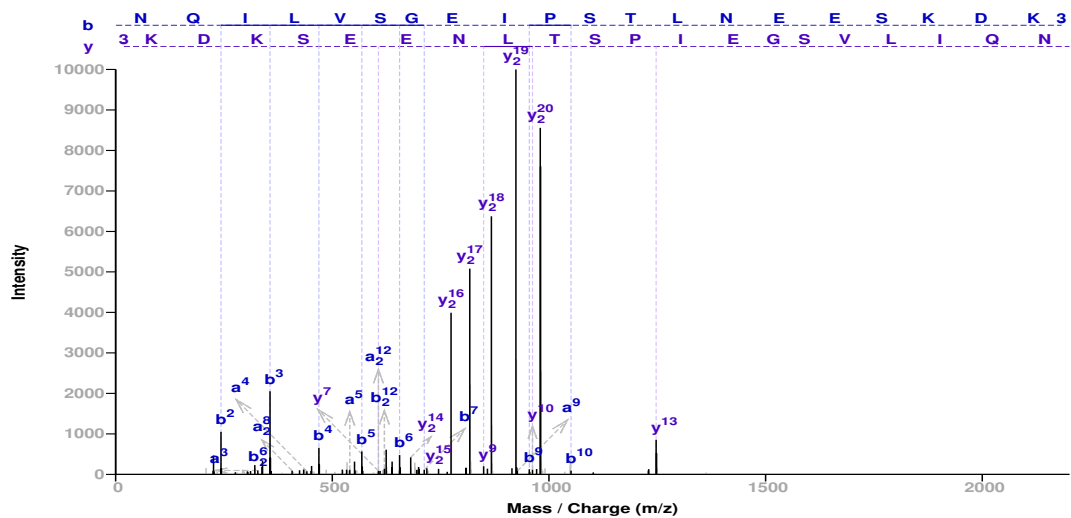

yeast4.Scan\_Number\_4221 Precursor m/z: 441.533 cosine: 0.747  $\alpha$ : 0.341

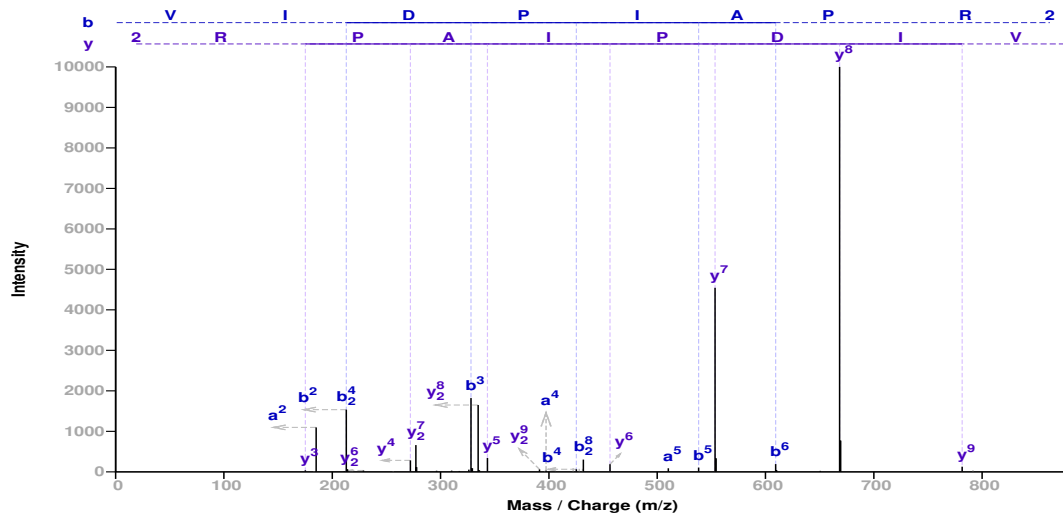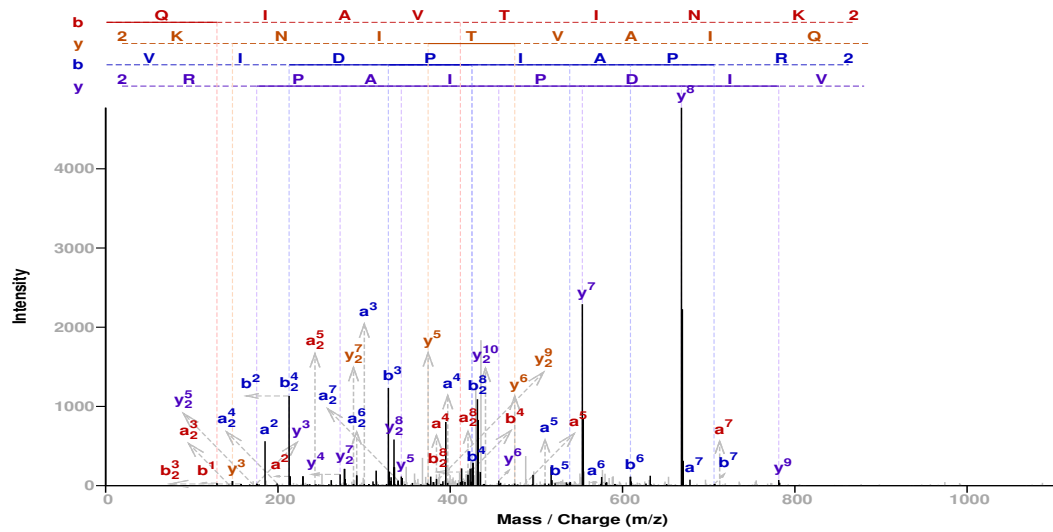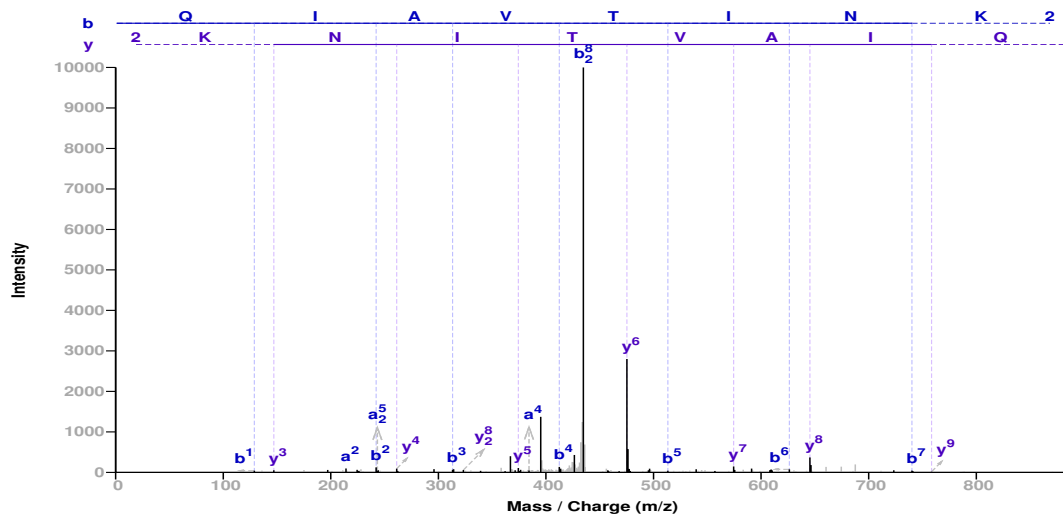

yeast4\_Scan\_Number\_4803 Precursor m/z: 425.221 cosine: 0.735  $\alpha$ : 0.339

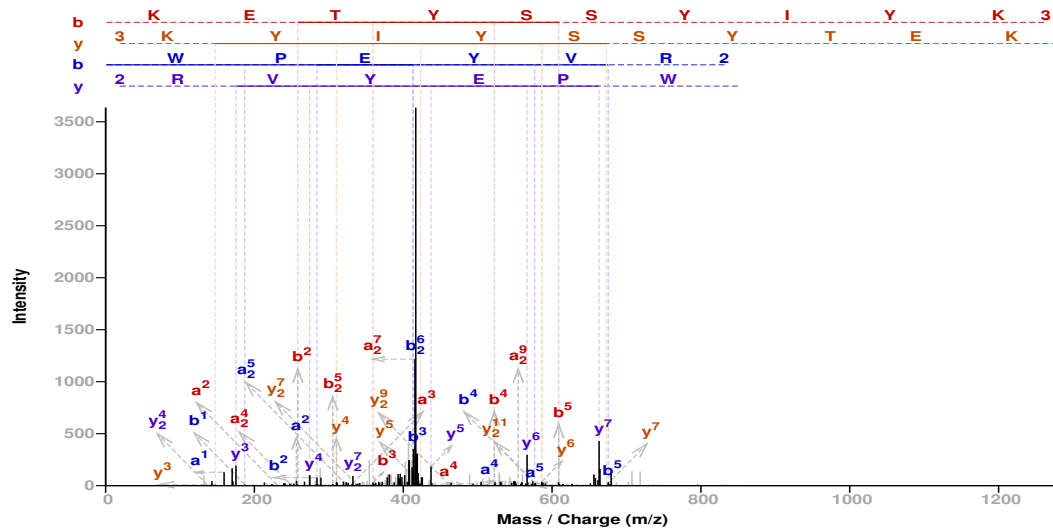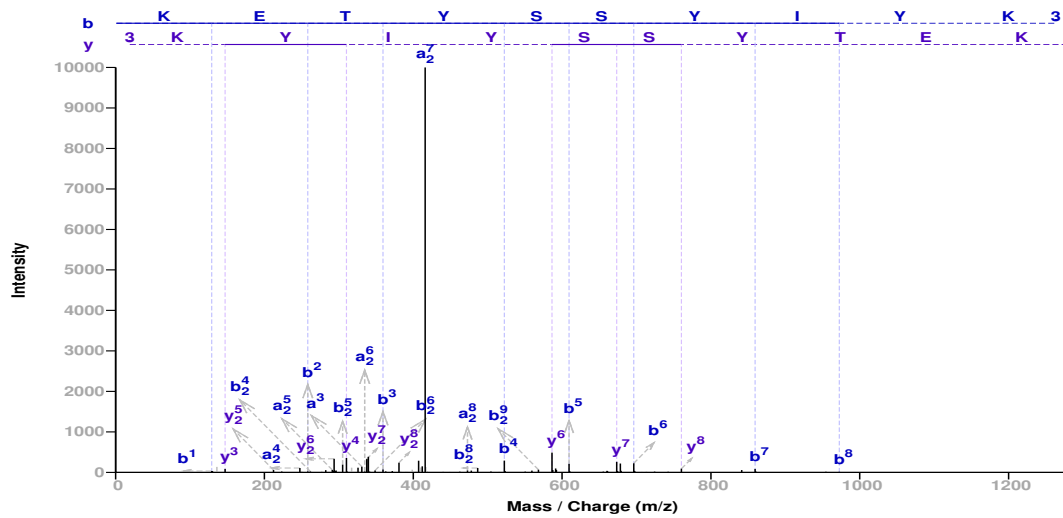

yeast4\_Scan\_Number\_2572 Precursor m/z: 529.317 cosine: 0.796  $\alpha$ : 0.338

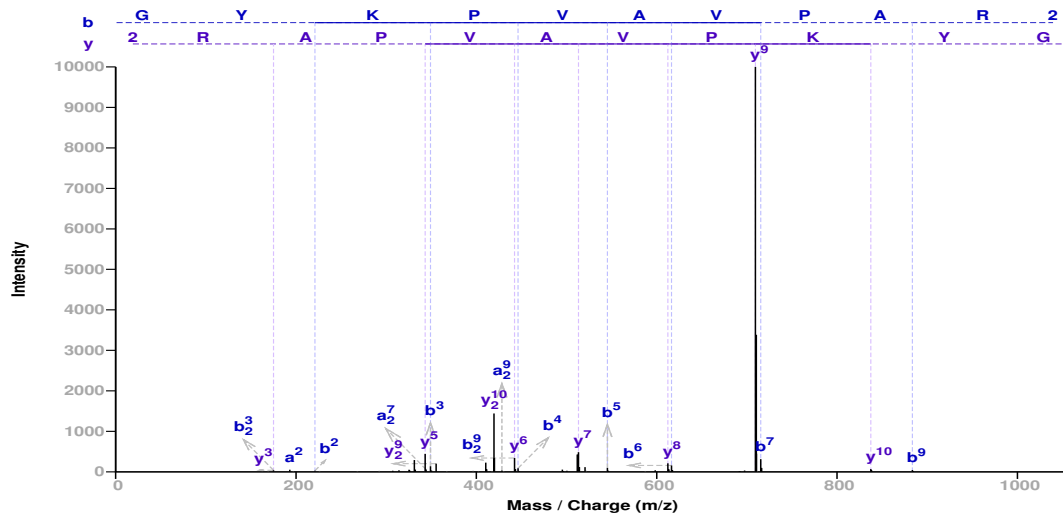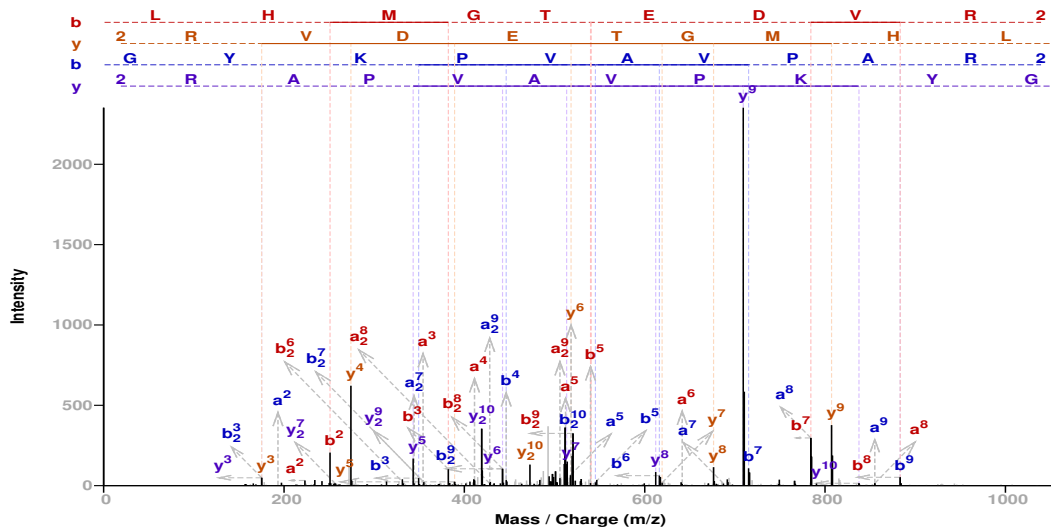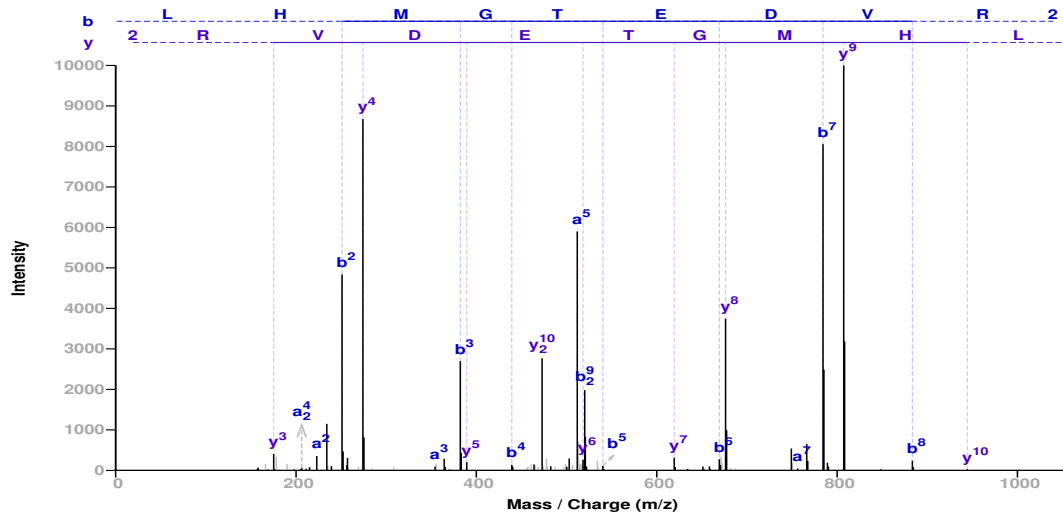

yeast4\_Scan\_Number\_5109 Precursor m/z: 466.756 cosine: 0.832  $\alpha$ : 0.338

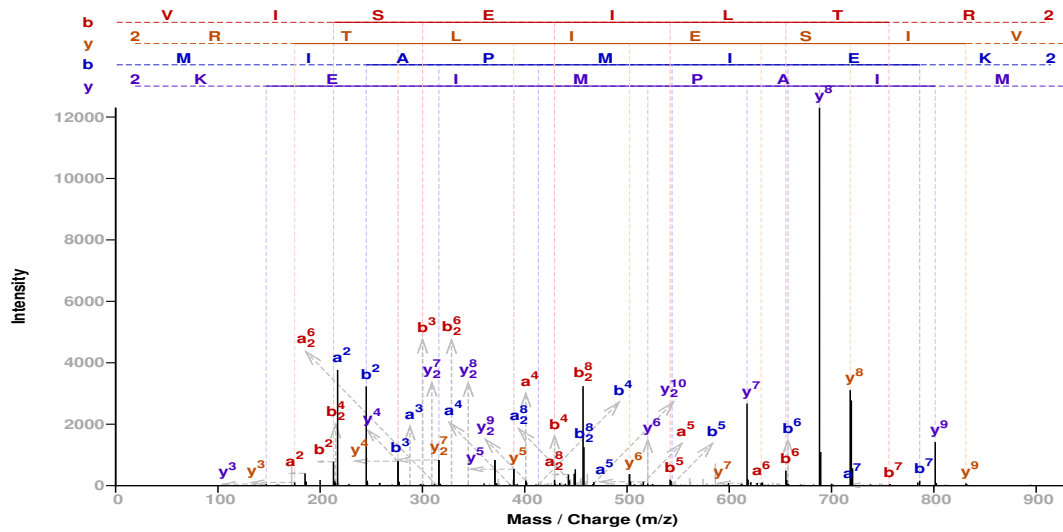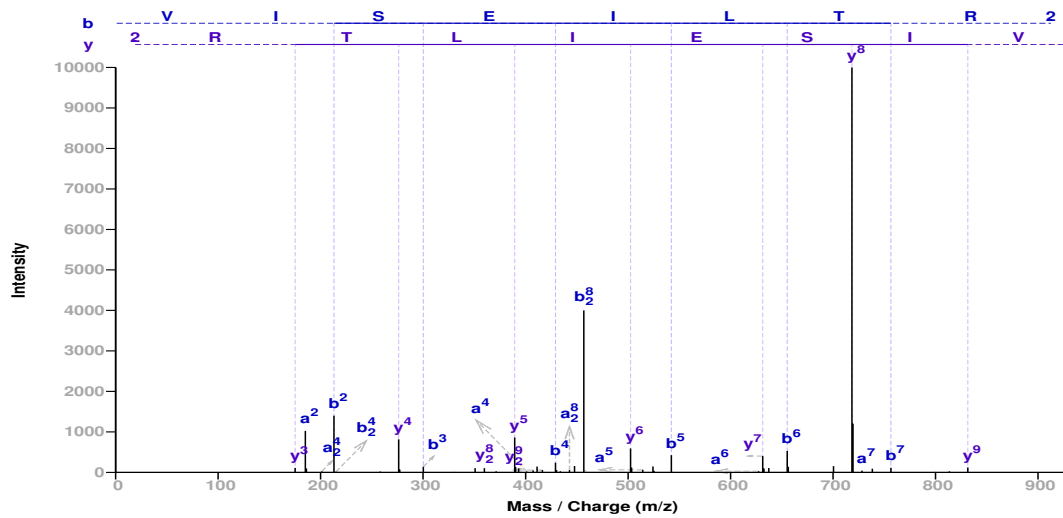

yeast4\_Scan\_Number\_4036 Precursor m/z: 378.876 cosine: 0.858  $\alpha$ : 0.337

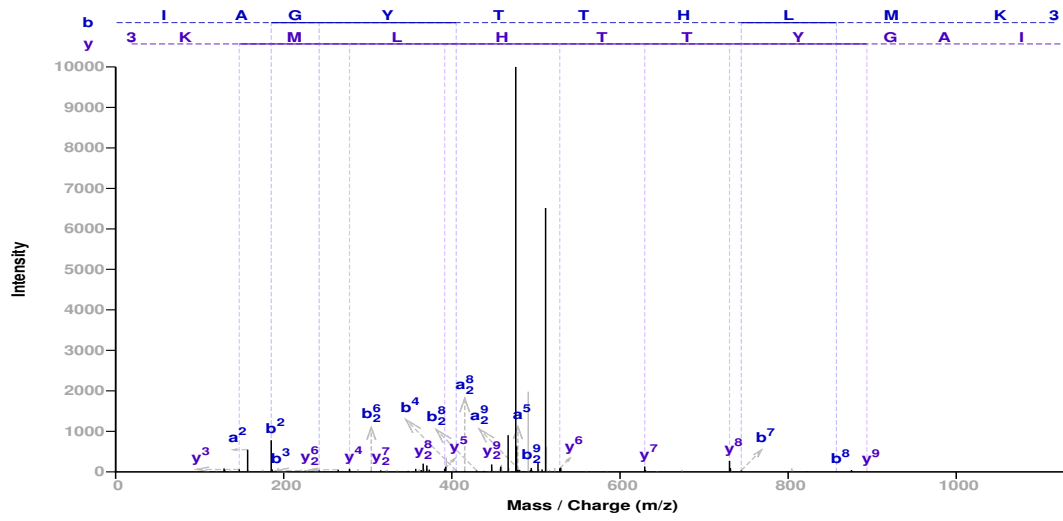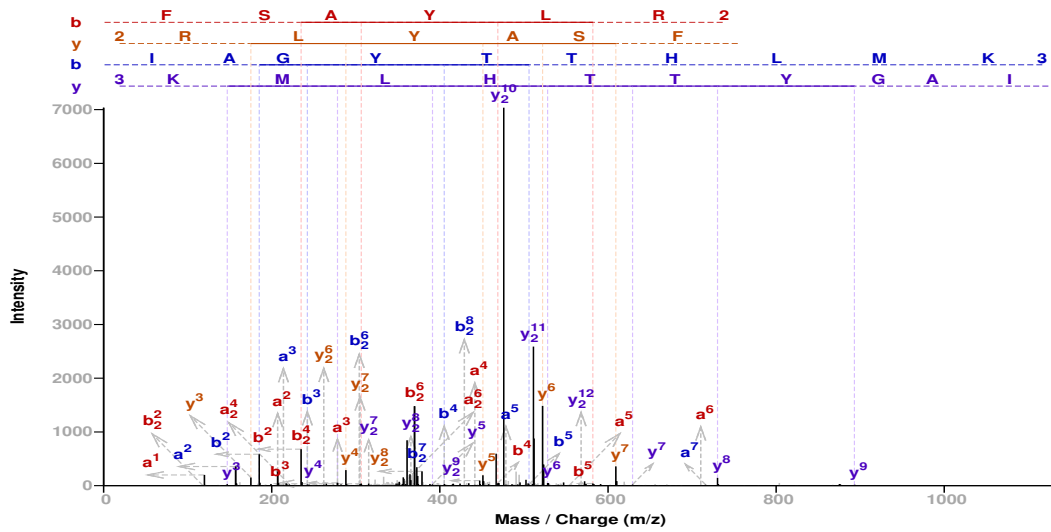

yeast4.Scan\_Number\_3465 Precursor m/z: 435.215 cosine: 0.740  $\alpha$ : 0.332

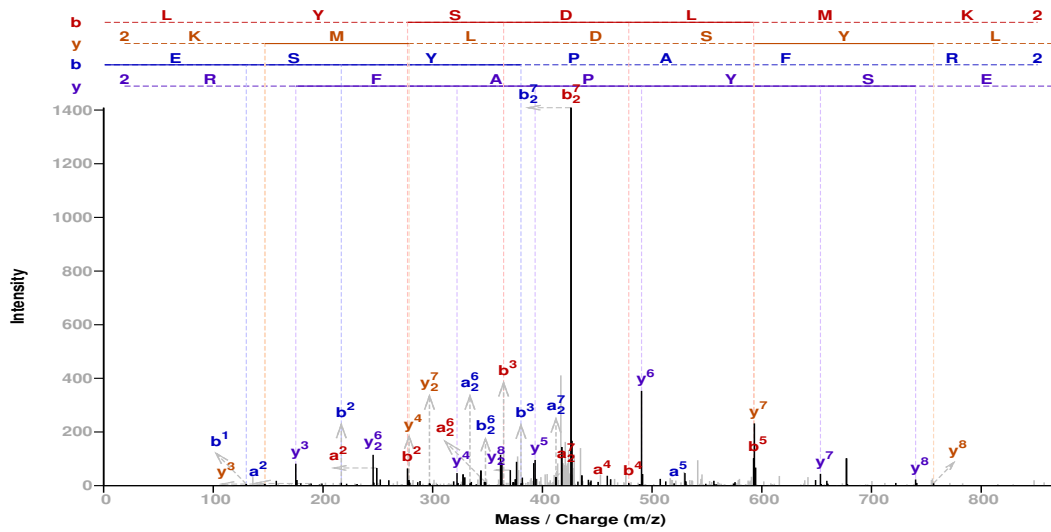

yeast4\_Scan\_Number\_3206 Precursor m/z: 472.759 cosine: 0.760  $\alpha$ : 0.328

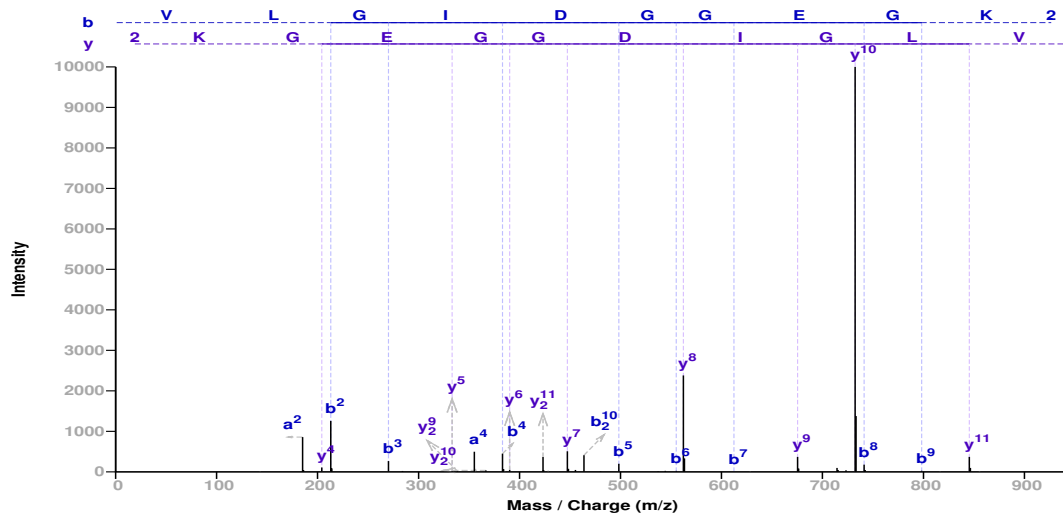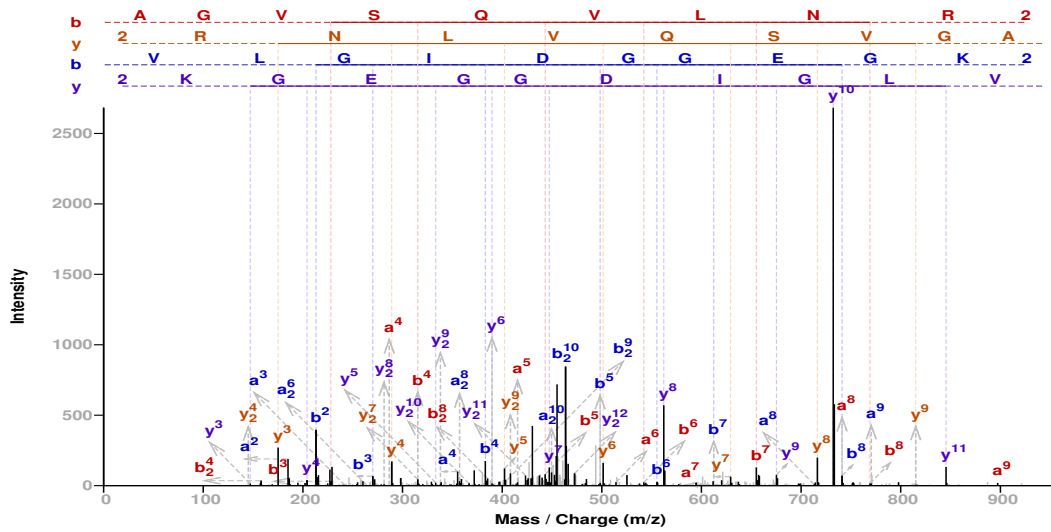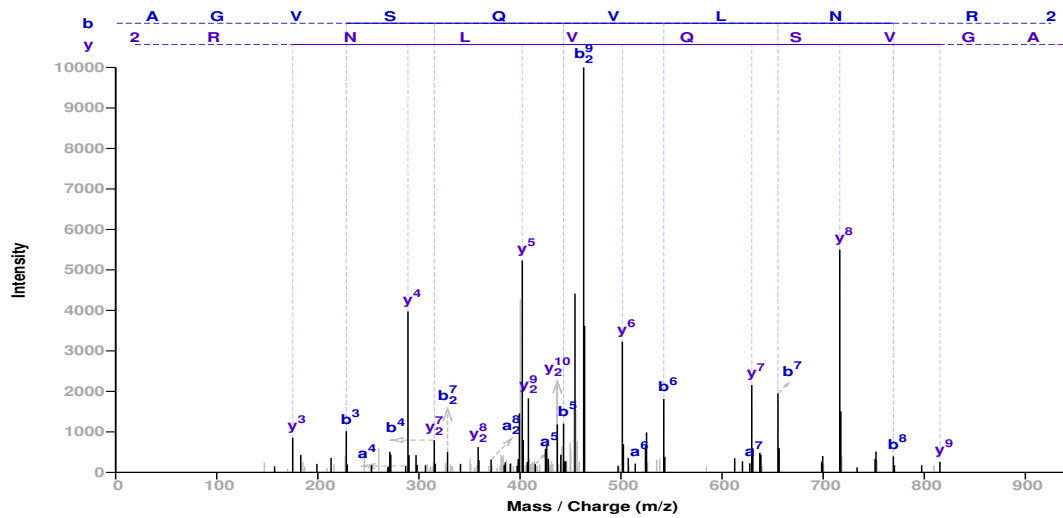







yeast4\_Scan\_Number\_6845 Precursor m/z: 618.328 cosine: 0.777  $\alpha$ : 0.300

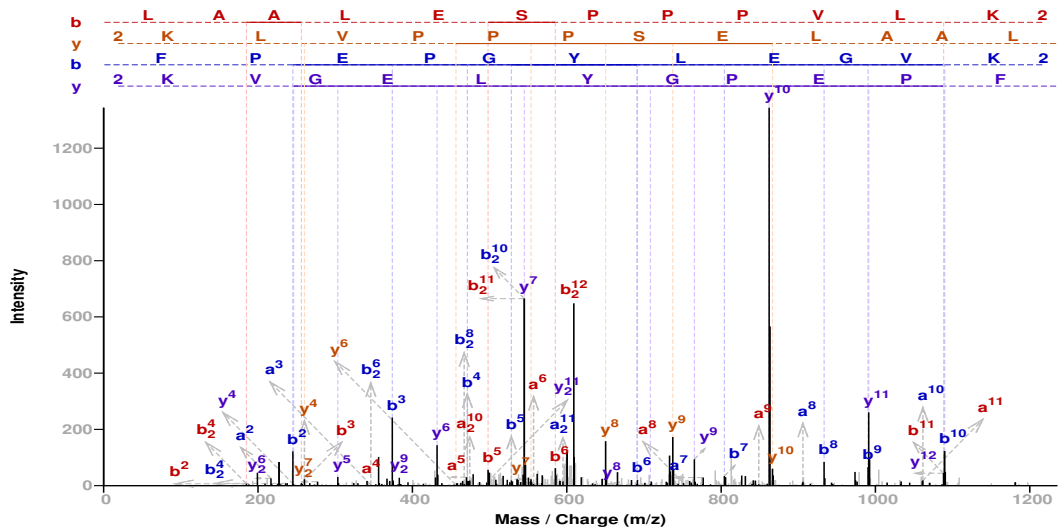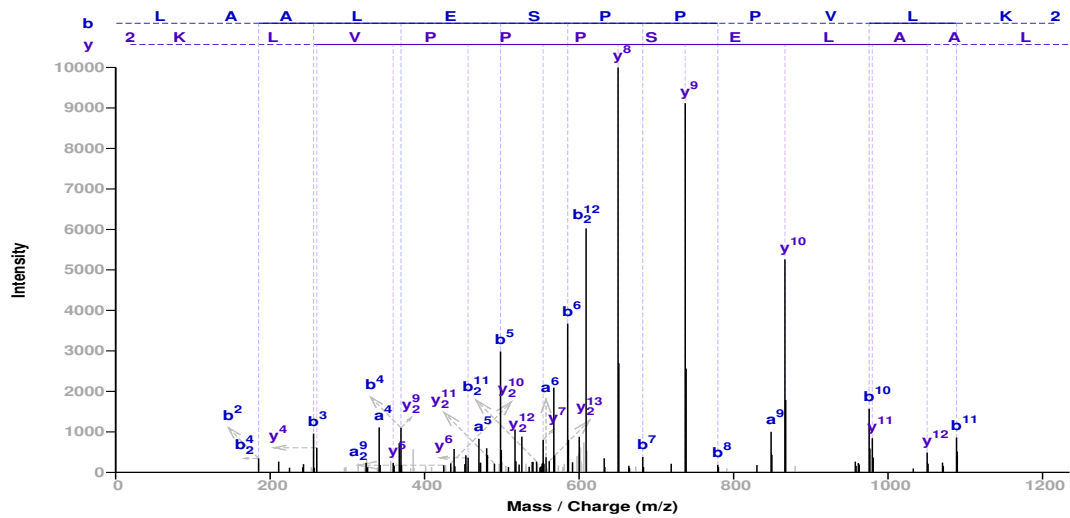

yeast4.Scan\_Number.1034 Precursor m/z: 406.217 cosine: 0.769  $\alpha$ : 0.299

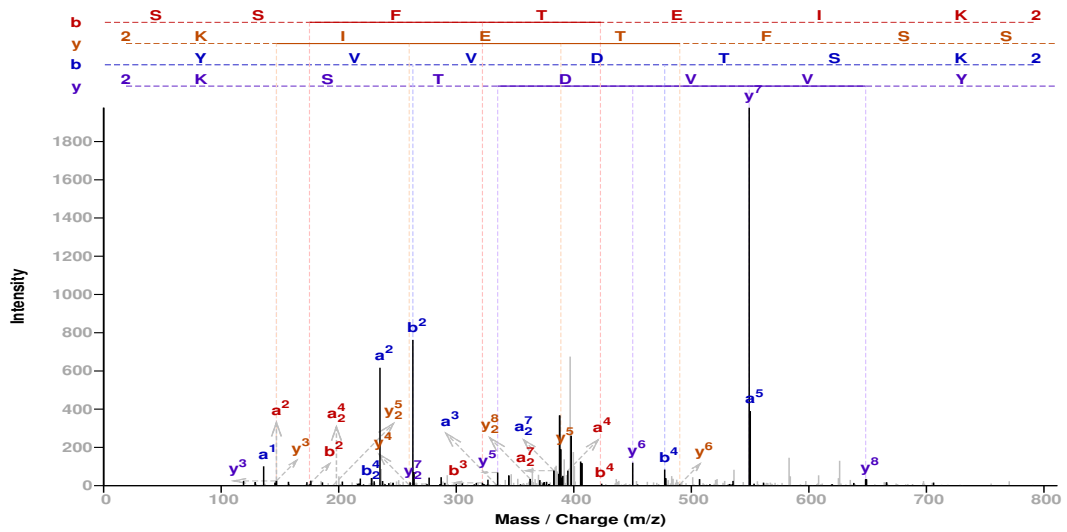

yeast4\_Scan\_Number\_5024 Precursor m/z: 506.621 cosine: 0.810  $\alpha$ : 0.298

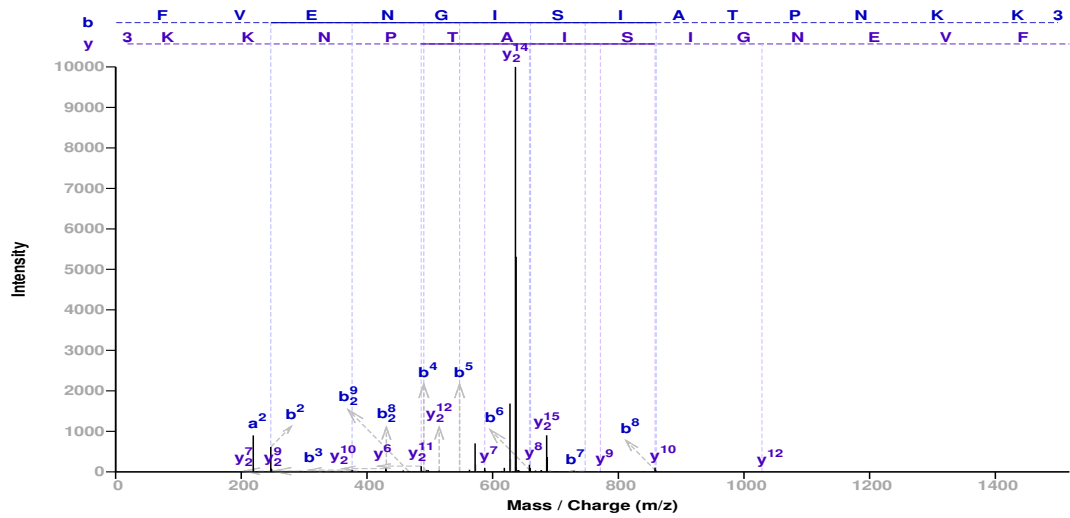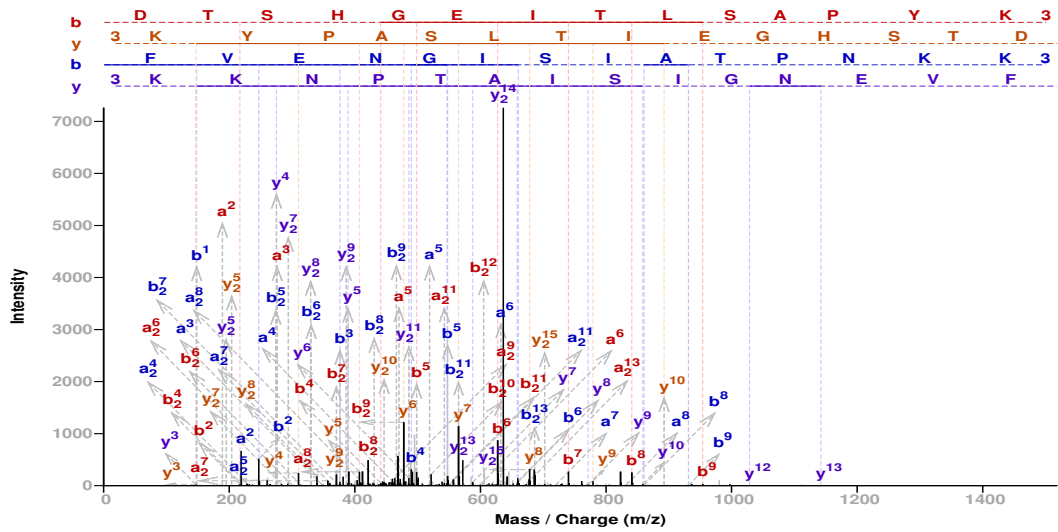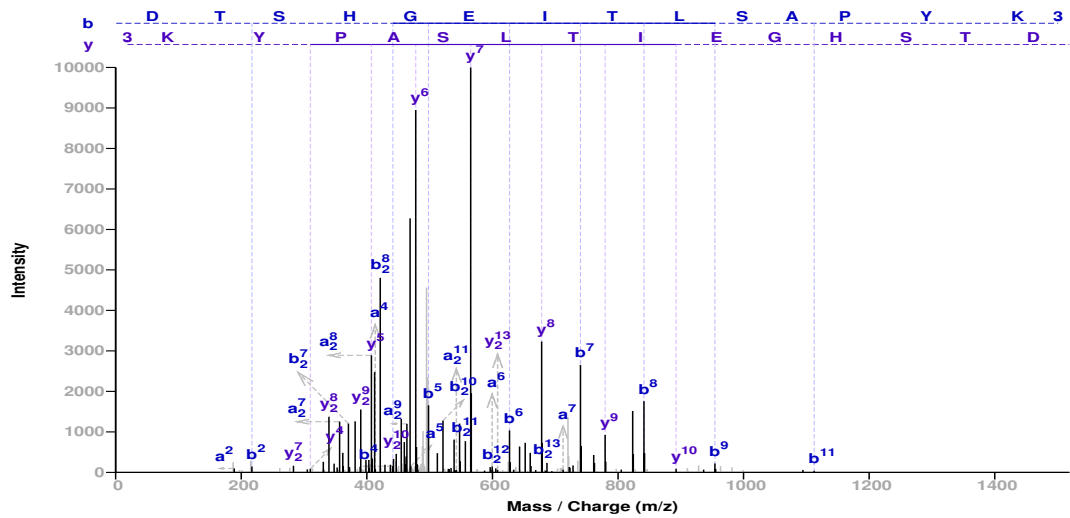

yeast4\_Scan\_Number\_1619 Precursor m/z: 415.202 cosine: 0.849  $\alpha$ : 0.298

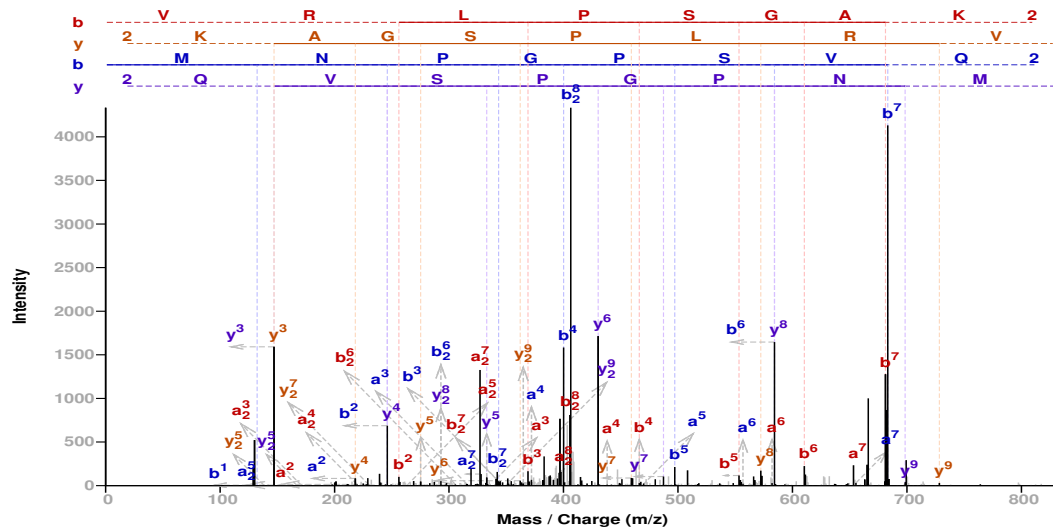

yeast4\_Scan\_Number\_2047 Precursor m/z: 340.694 cosine: 0.832  $\alpha$ : 0.292

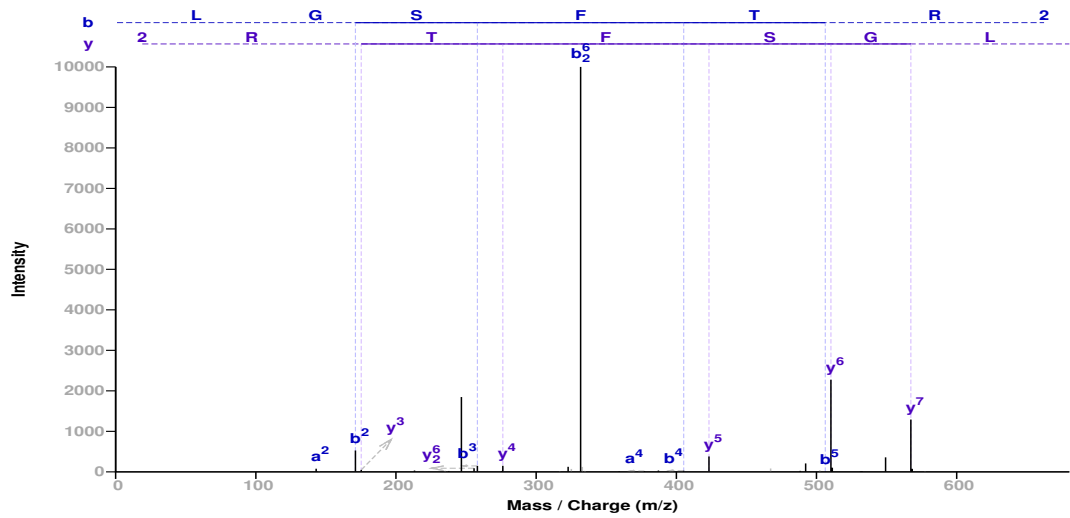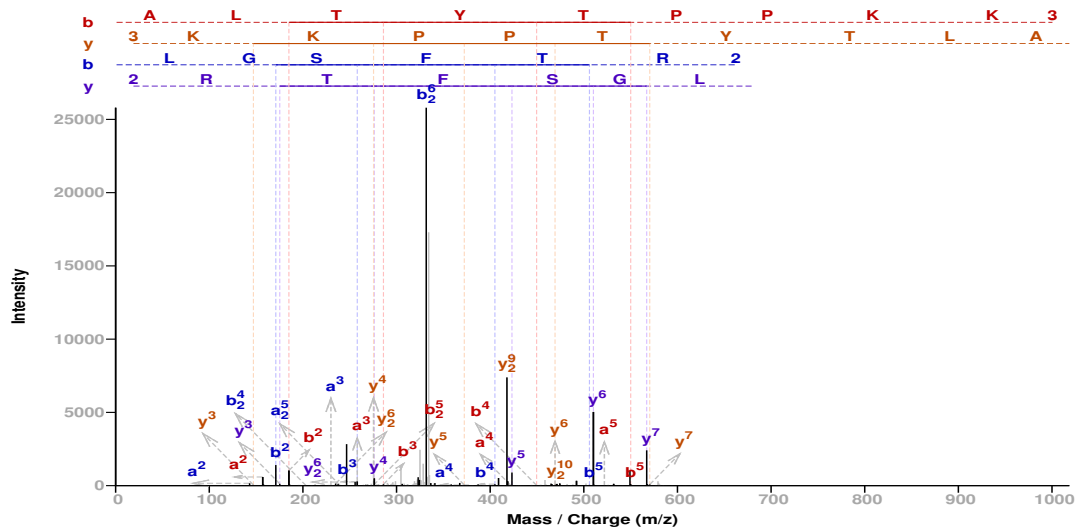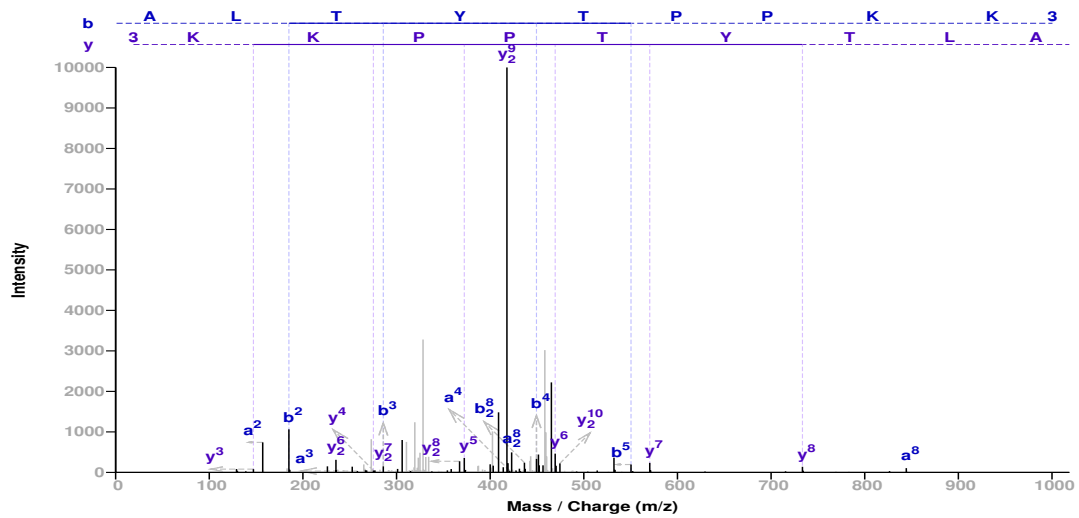

yeast4\_Scan\_Number\_3694 Precursor m/z: 580.279 cosine: 0.747  $\alpha$ : 0.291

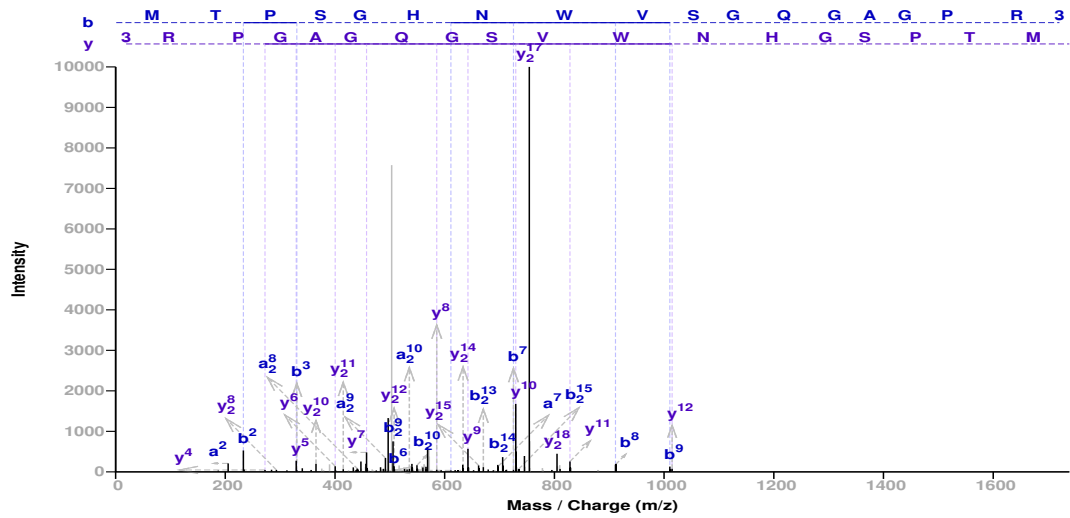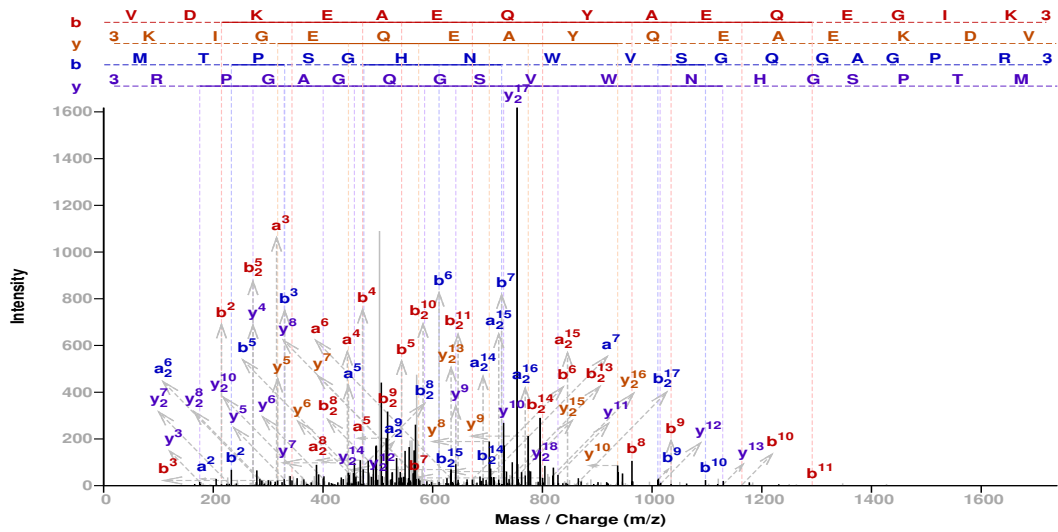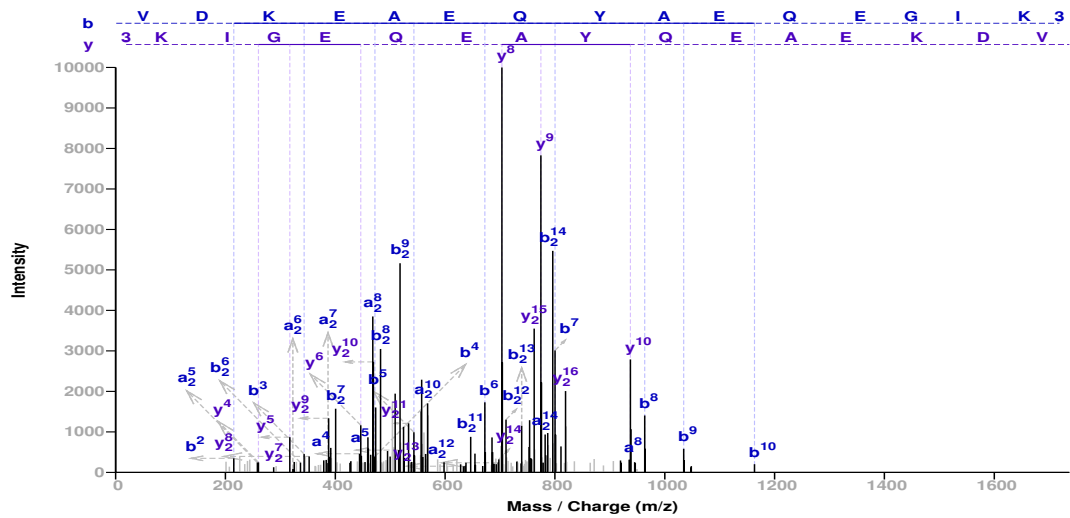



yeast4\_Scan\_Number\_8242 Precursor m/z: 481.795 cosine: 0.767  $\alpha$ : 0.290

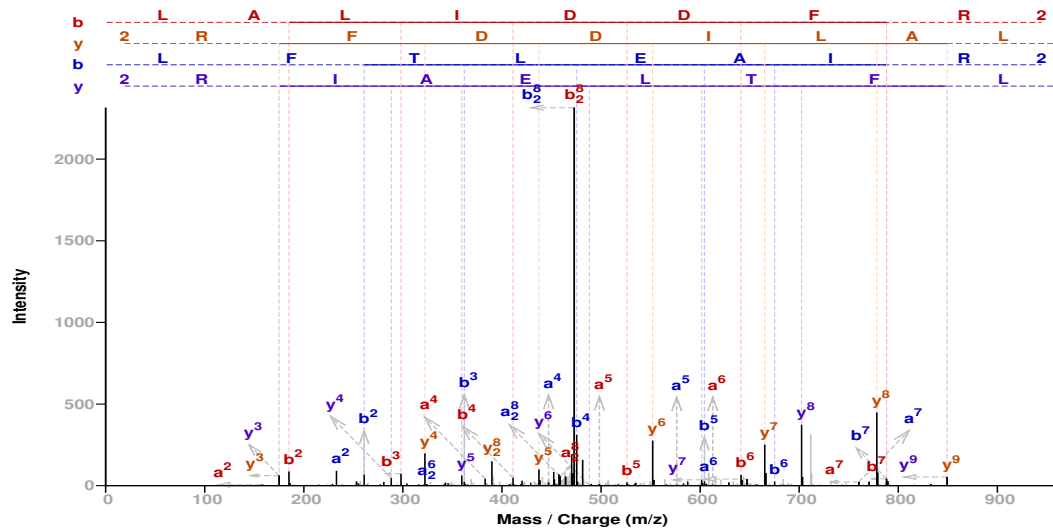

yeast4.Scan\_Number.2529 Precursor m/z: 396.721 cosine: 0.838  $\alpha$ : 0.290

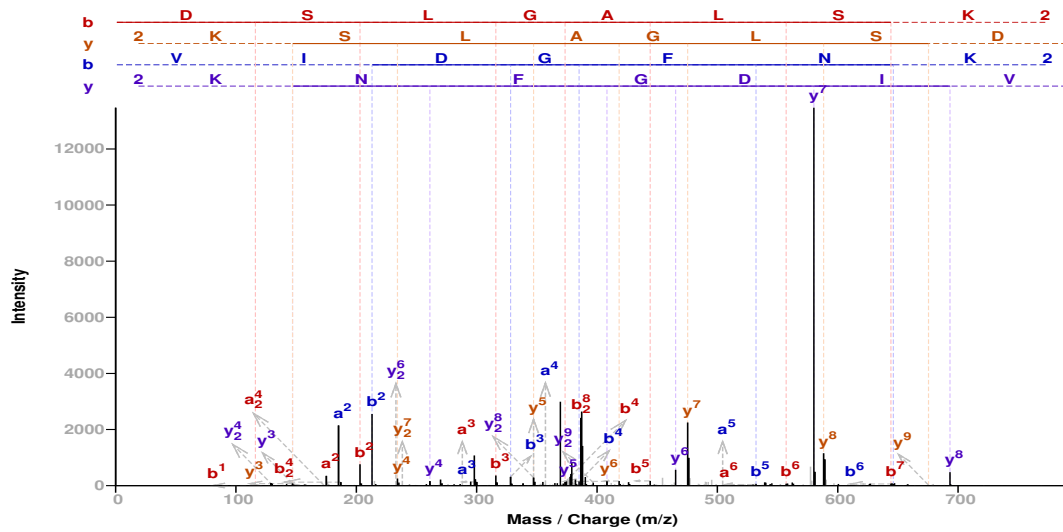

yeast4\_Scan\_Number\_3173 Precursor m/z: 480.284 cosine: 0.768  $\alpha$ : 0.287

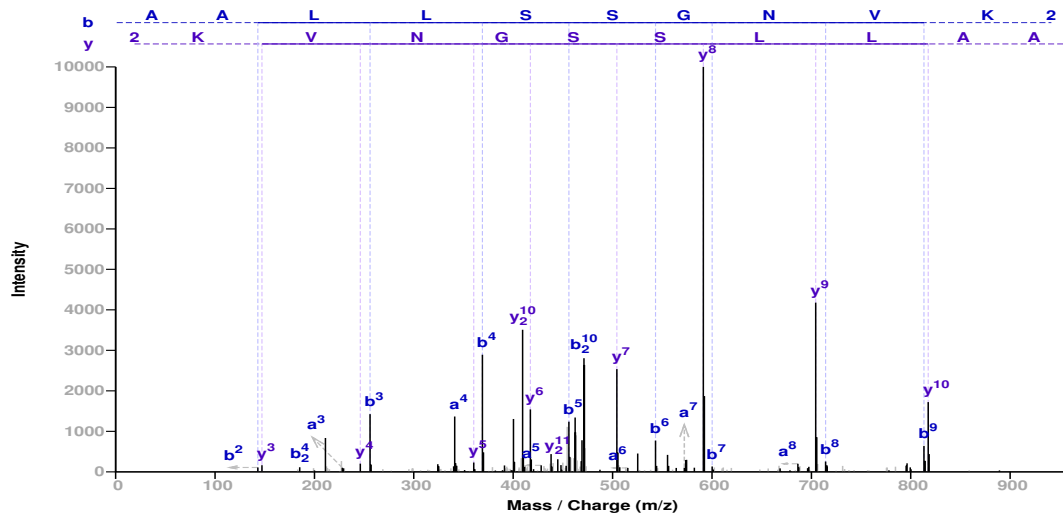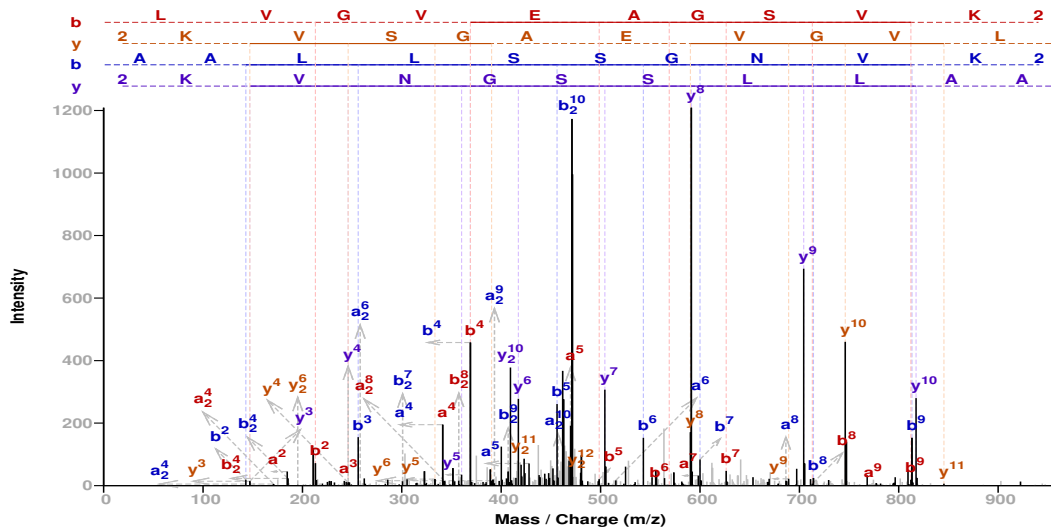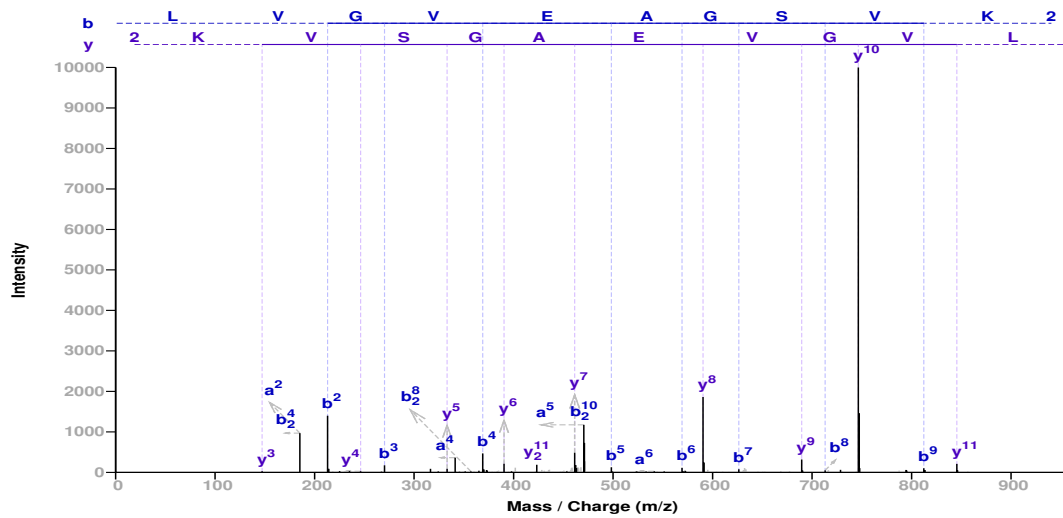

yeast4\_Scan\_Number\_987 Precursor m/z: 337.694 cosine: 0.930  $\alpha$ : 0.286

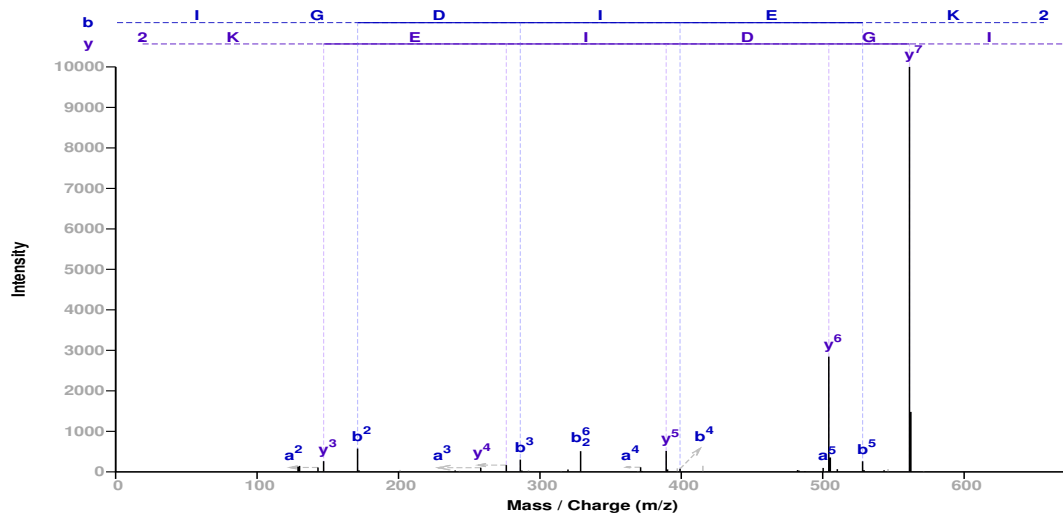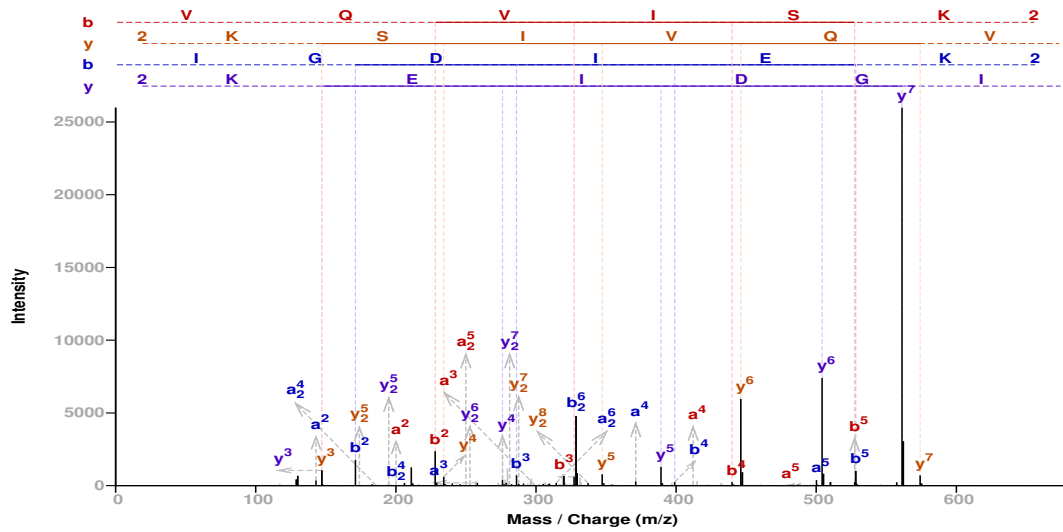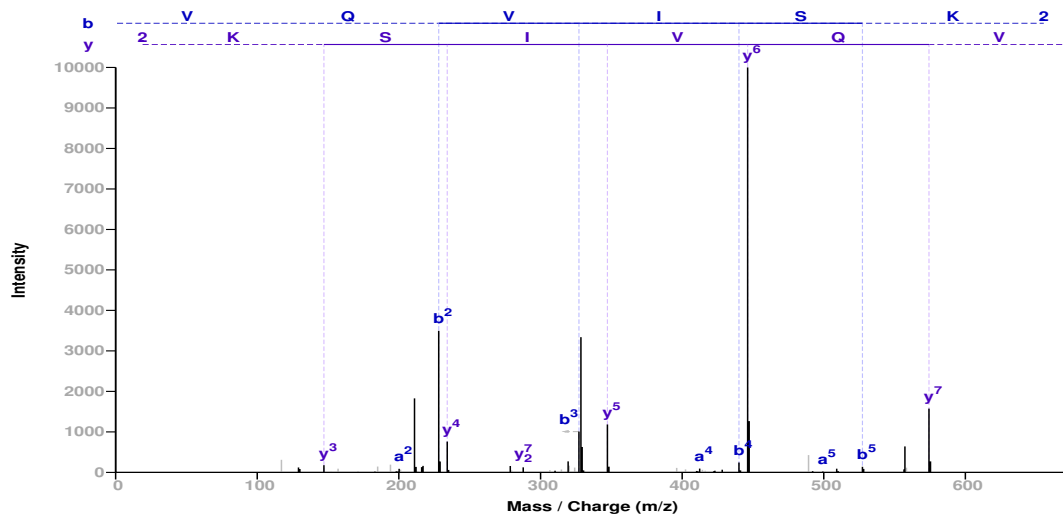

yeast4\_Scan\_Number\_7256 Precursor m/z: 632.836 cosine: 0.785  $\alpha$ : 0.279

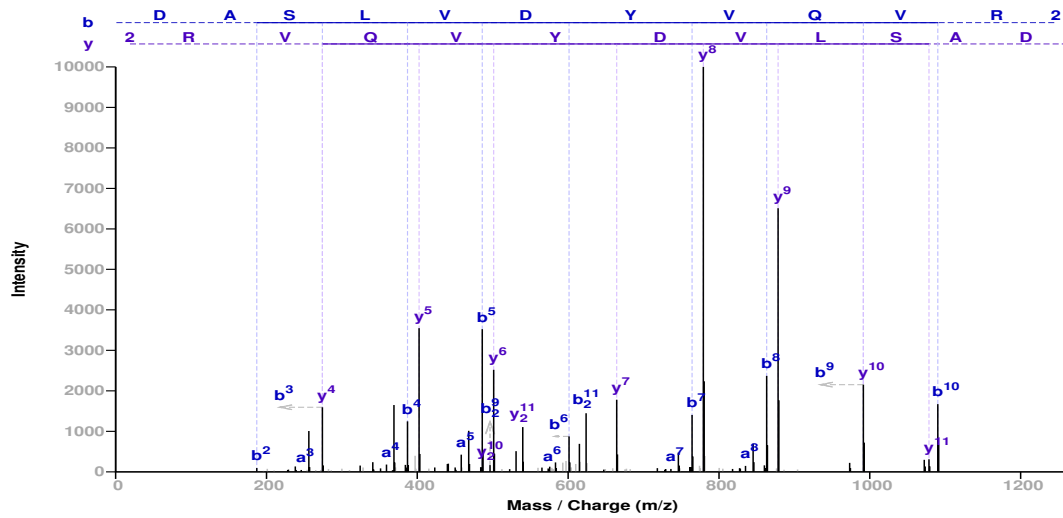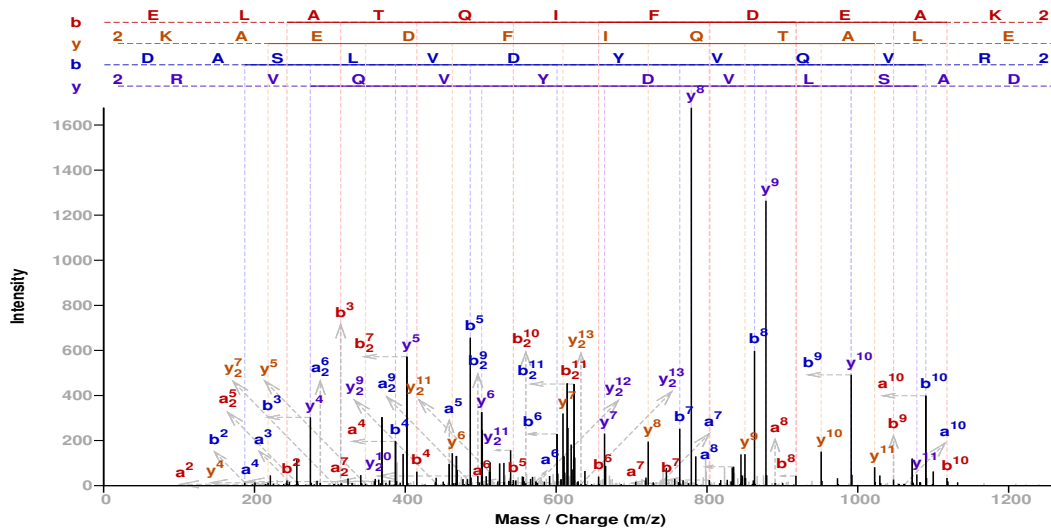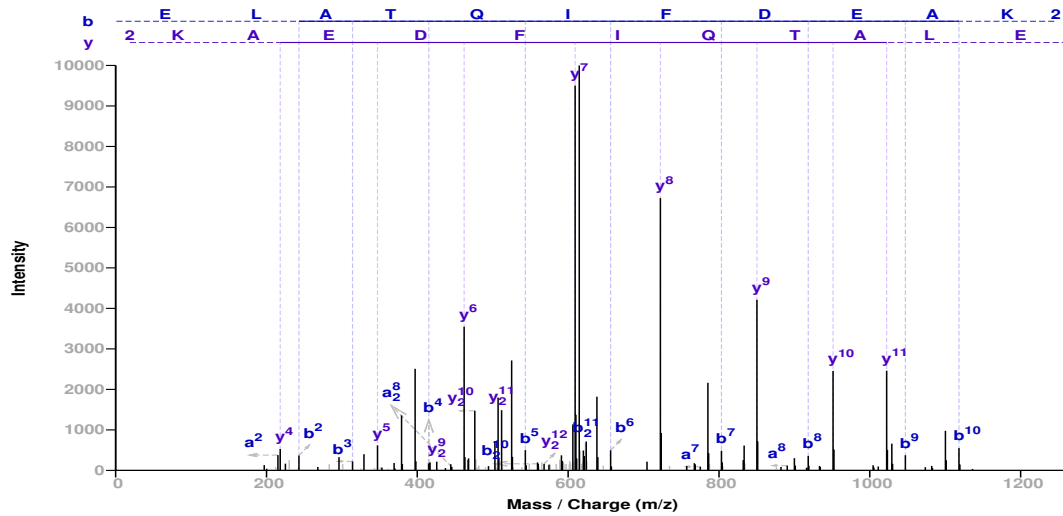

yeast4\_Scan\_Number\_5542 Precursor m/z: 471.245 cosine: 0.837  $\alpha$ : 0.278

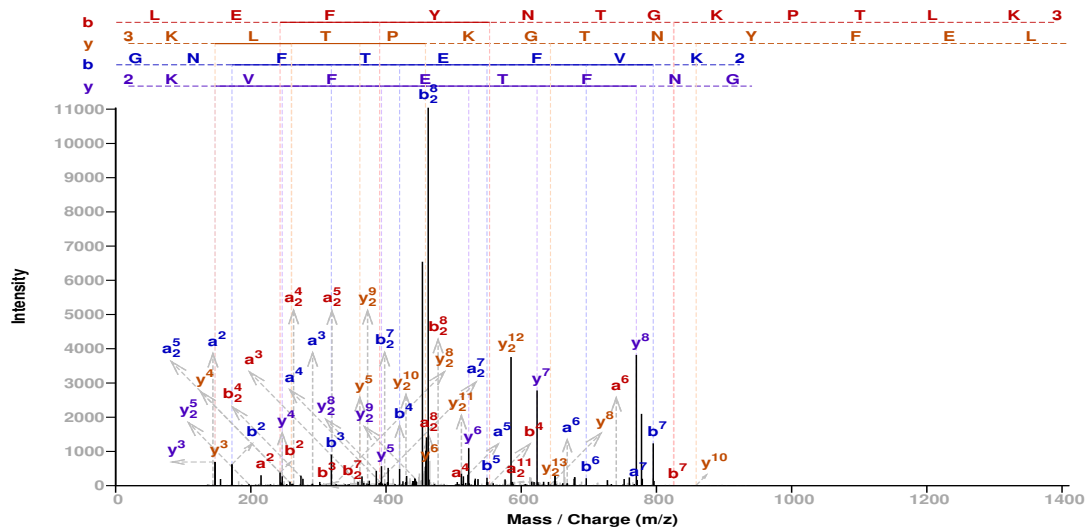

yeast4\_Scan\_Number\_7873 Precursor m/z: 749.416 cosine: 0.812  $\alpha$ : 0.275

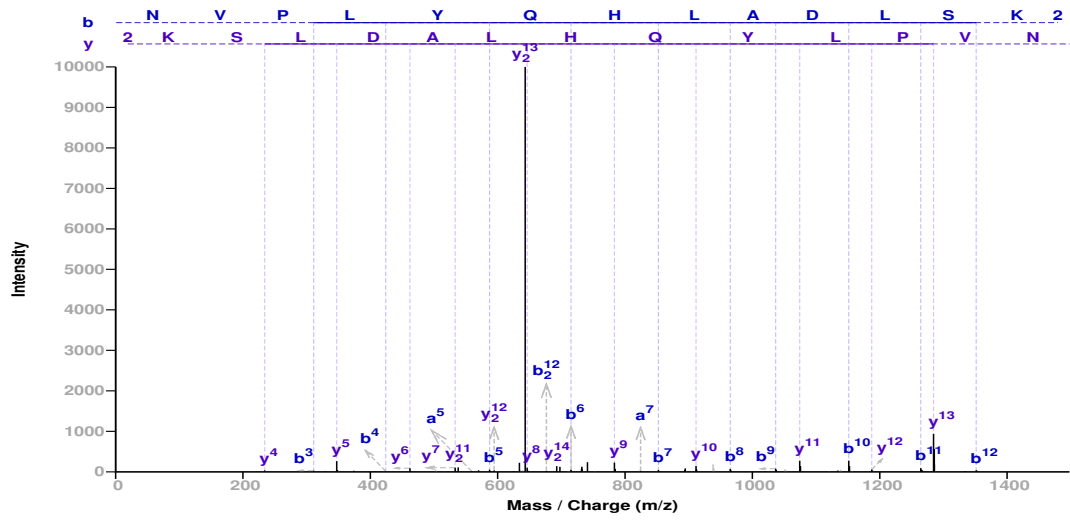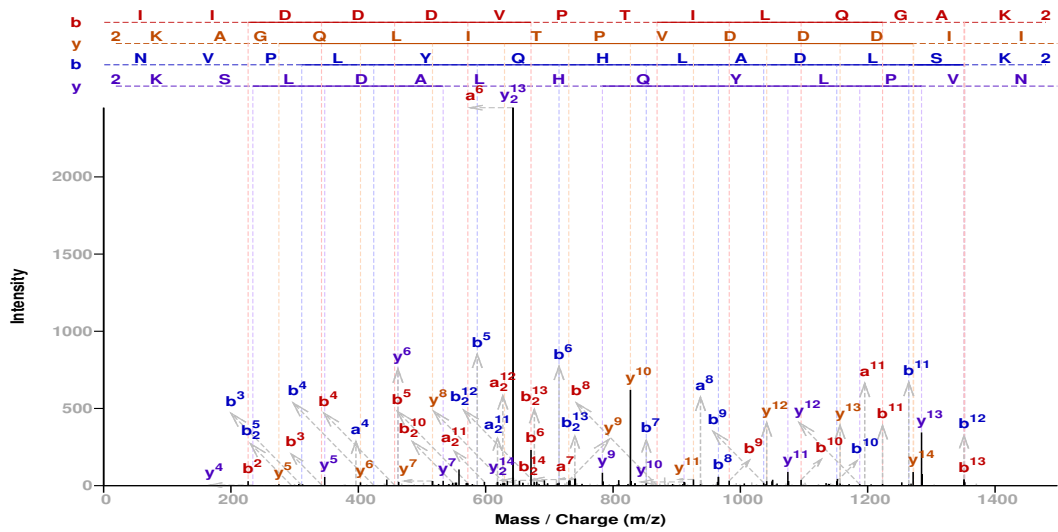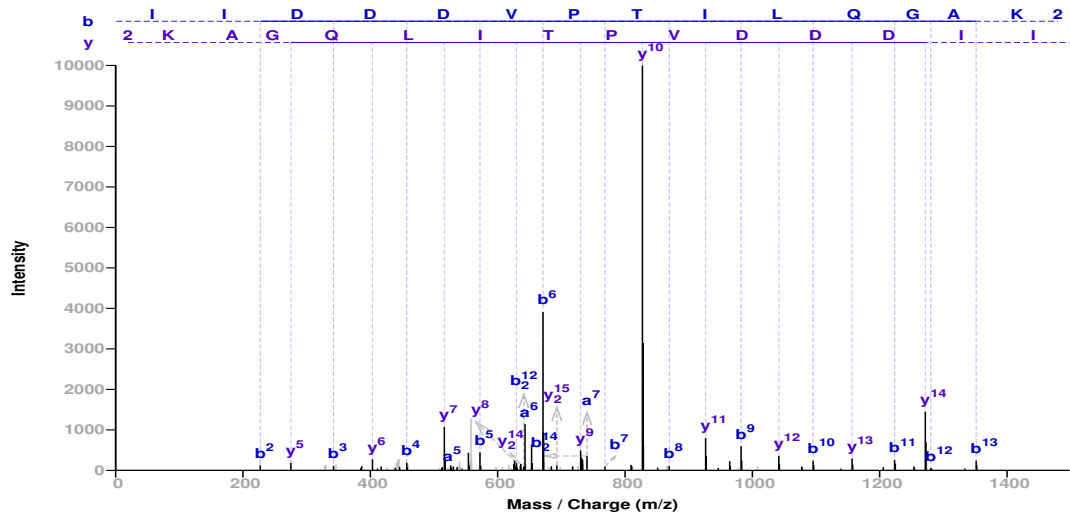

yeast4.Scan\_Number\_6545 Precursor m/z: 758.878 cosine: 0.767  $\alpha$ : 0.268

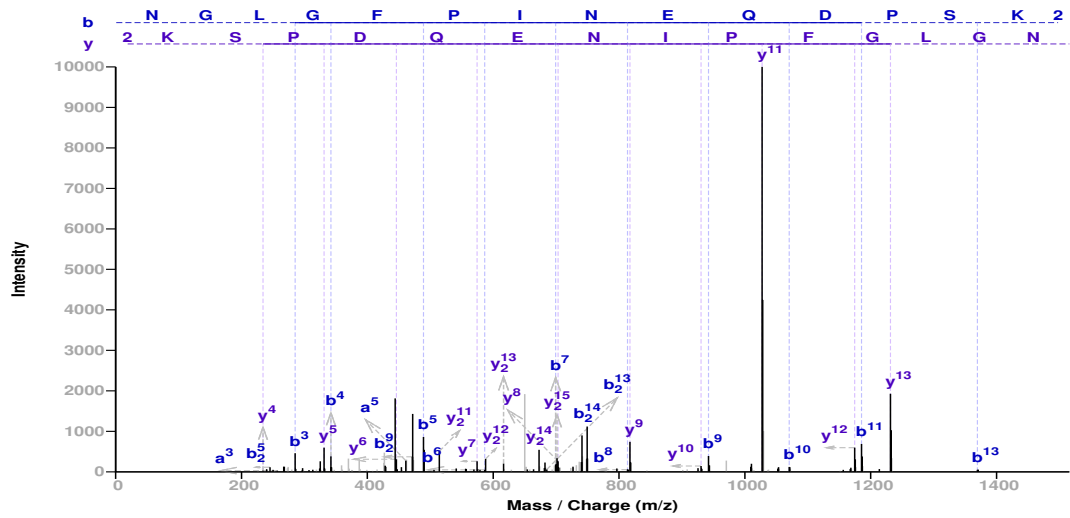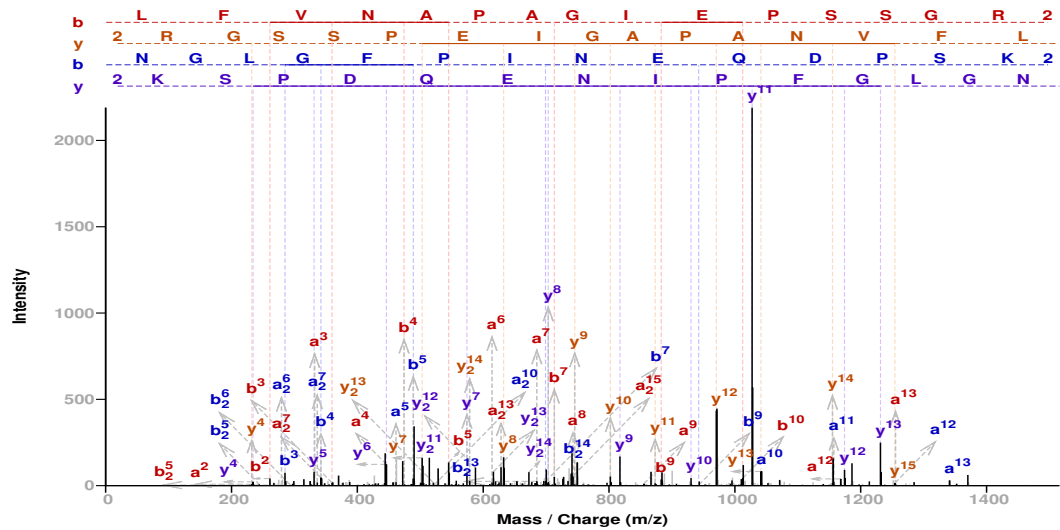



yeast4\_Scan\_Number\_2296 Precursor m/z: 492.284 cosine: 0.813  $\alpha$ : 0.263

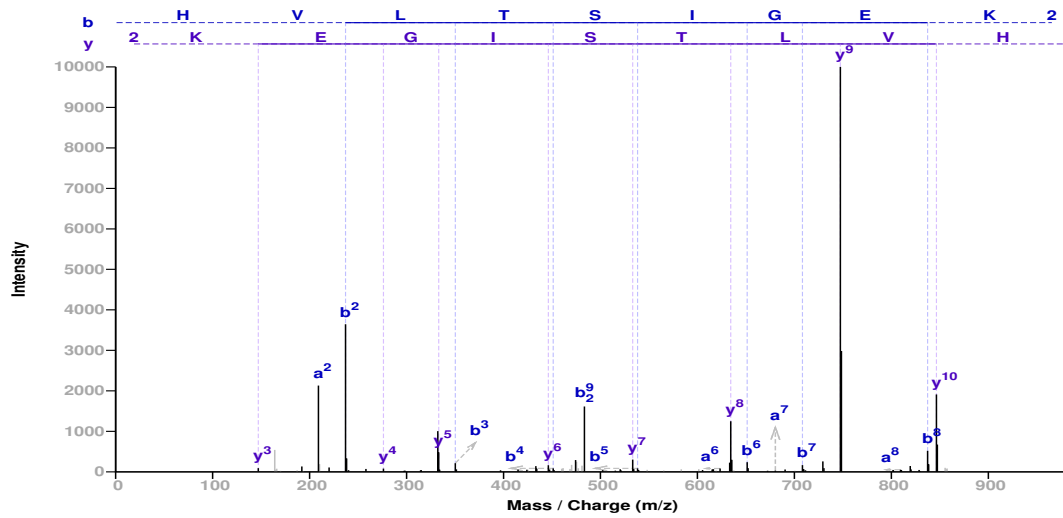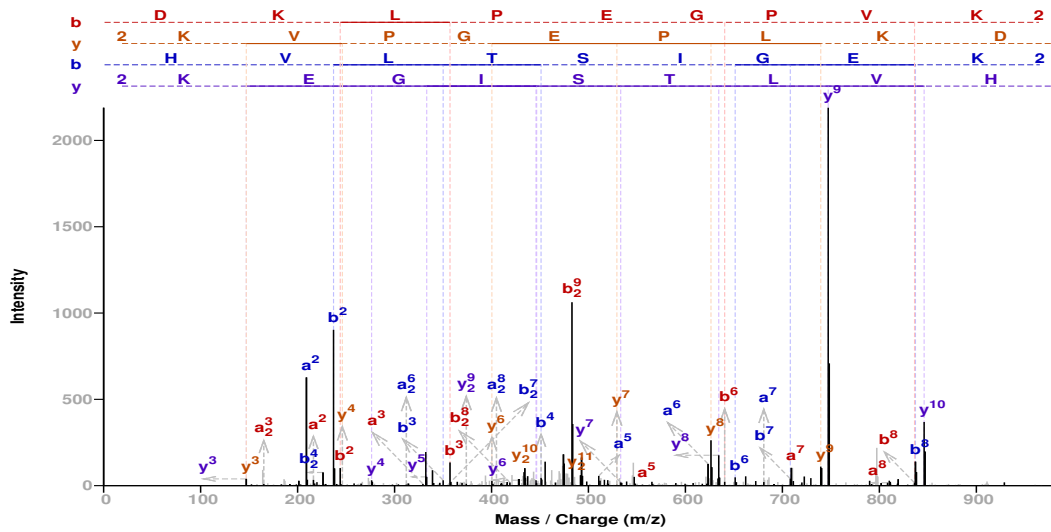

yeast4.Scan\_Number.1154 Precursor m/z: 529.776 cosine: 0.756  $\alpha$ : 0.258

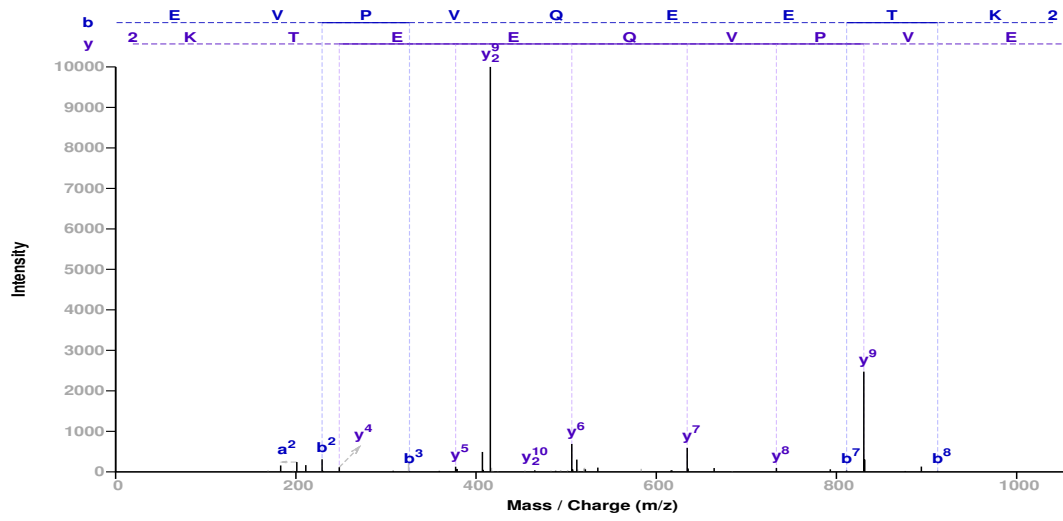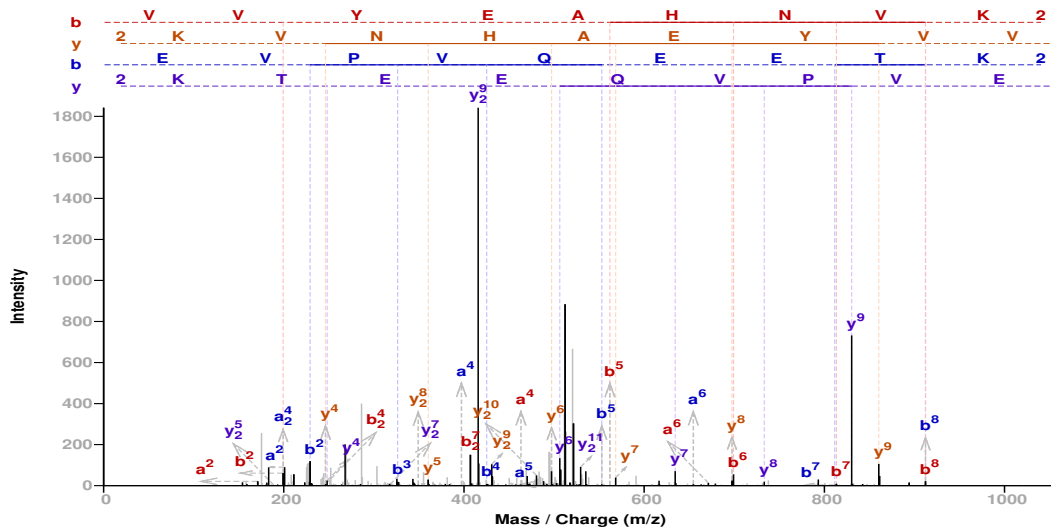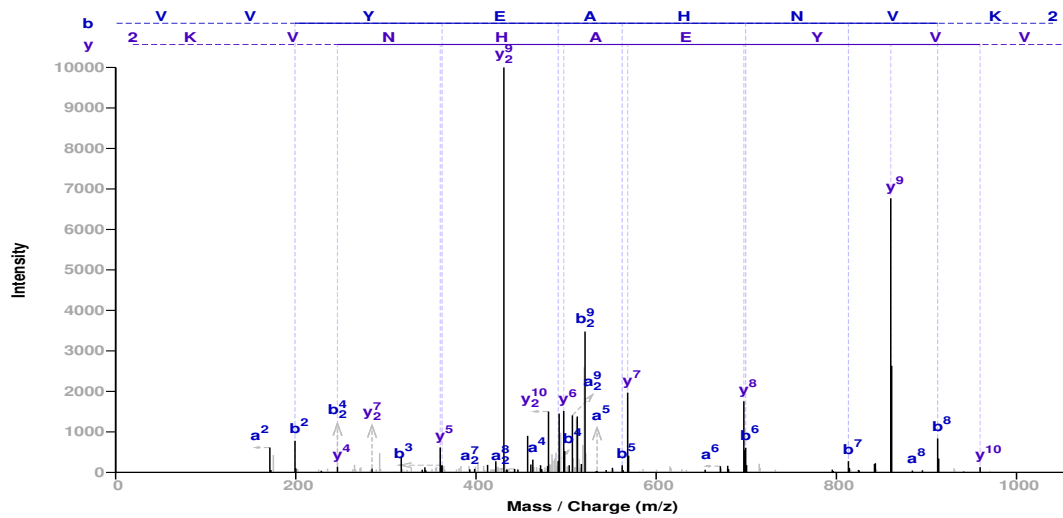

yeast4.Scan\_Number\_6112 Precursor m/z: 631.334 cosine: 0.789  $\alpha$ : 0.256

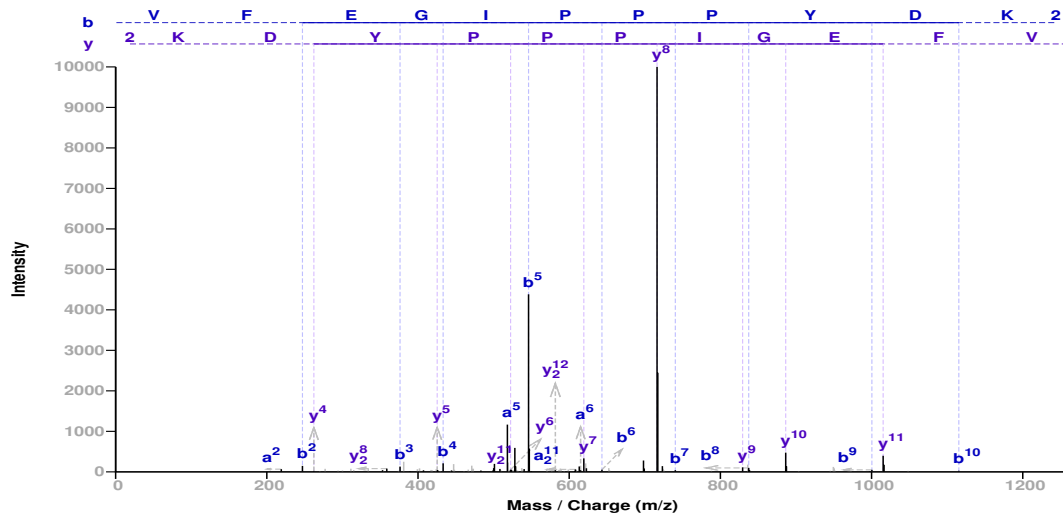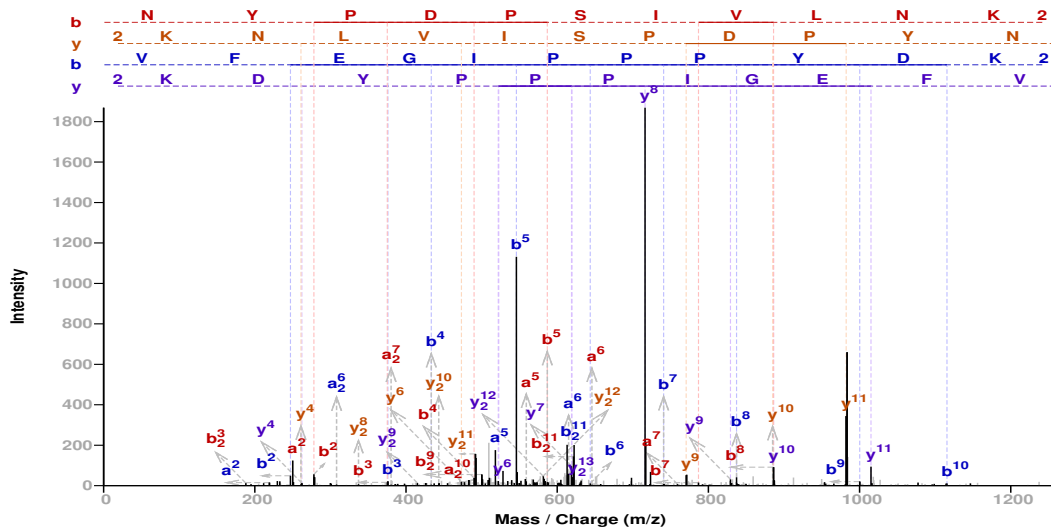

yeast4\_Scan\_Number\_8016 Precursor m/z: 623.337 cosine: 0.792  $\alpha$ : 0.251

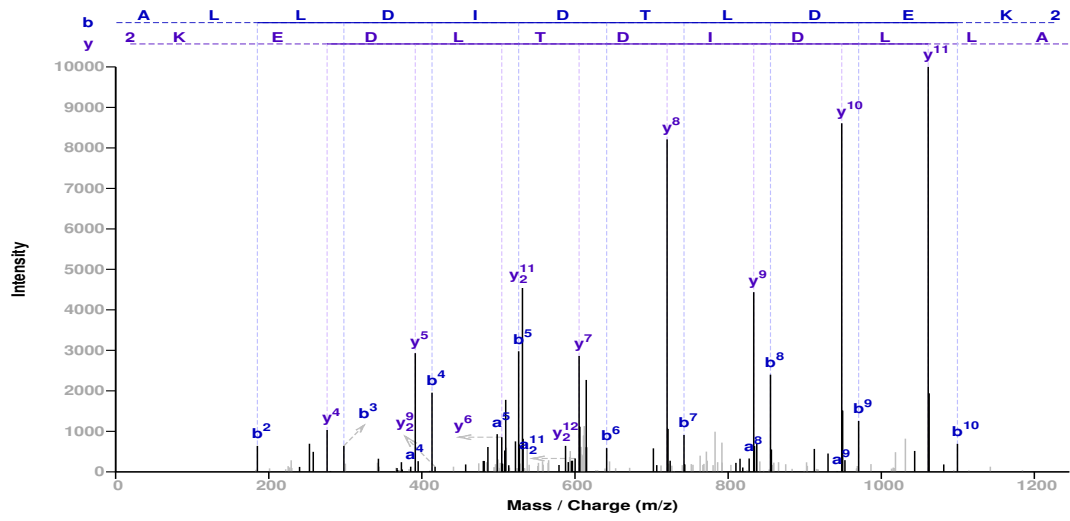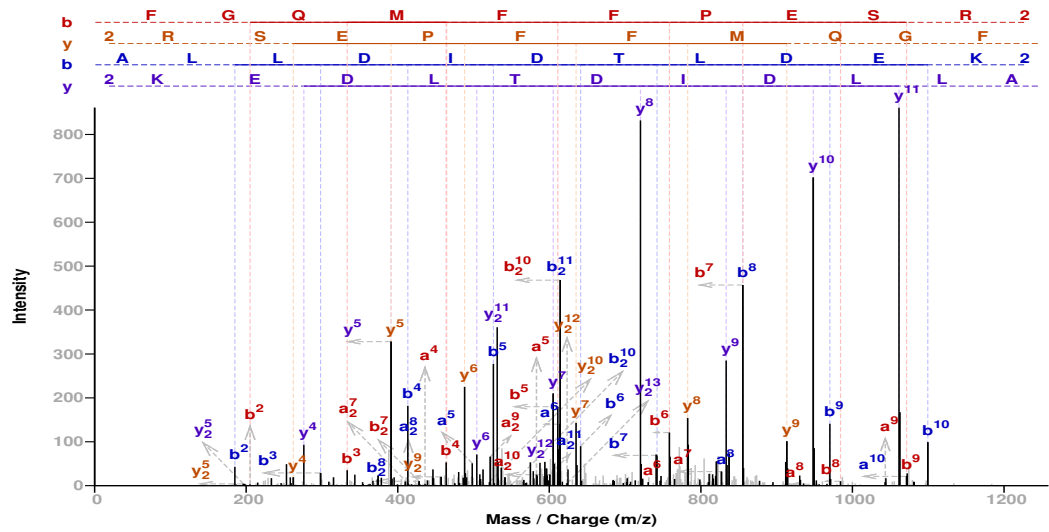

yeast4\_Scan\_Number\_2044 Precursor m/z: 424.253 cosine: 0.946  $\alpha$ : 0.250

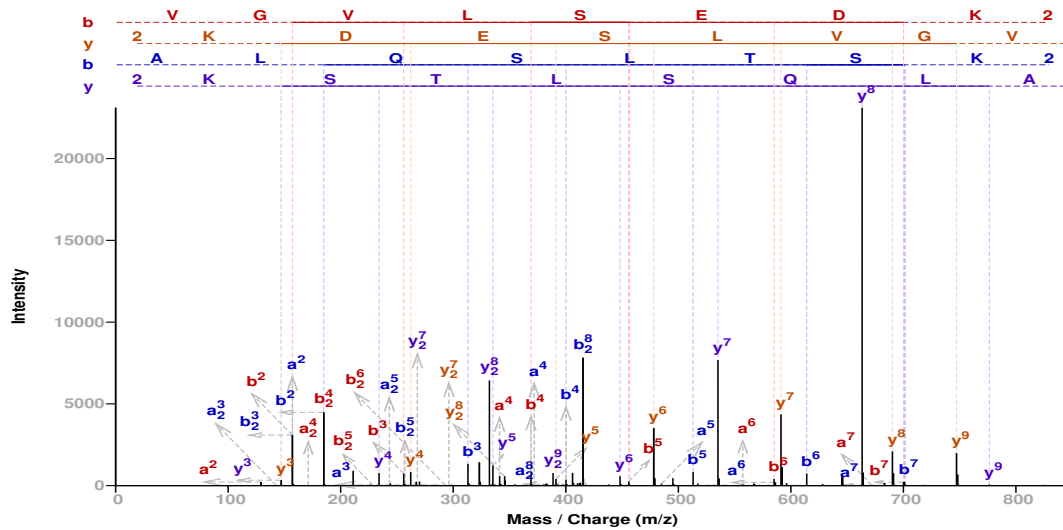

yeast4.Scan\_Number\_3881 Precursor m/z: 428.221 cosine: 0.746  $\alpha$ : 0.249

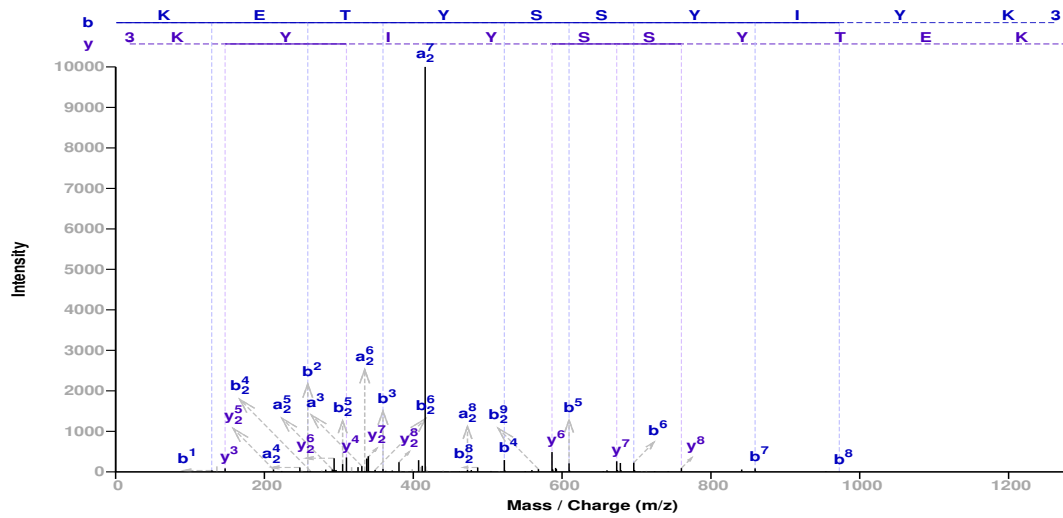

yeast4.Scan\_Number.2352 Precursor m/z: 499.248 cosine: 0.755  $\alpha$ : 0.249

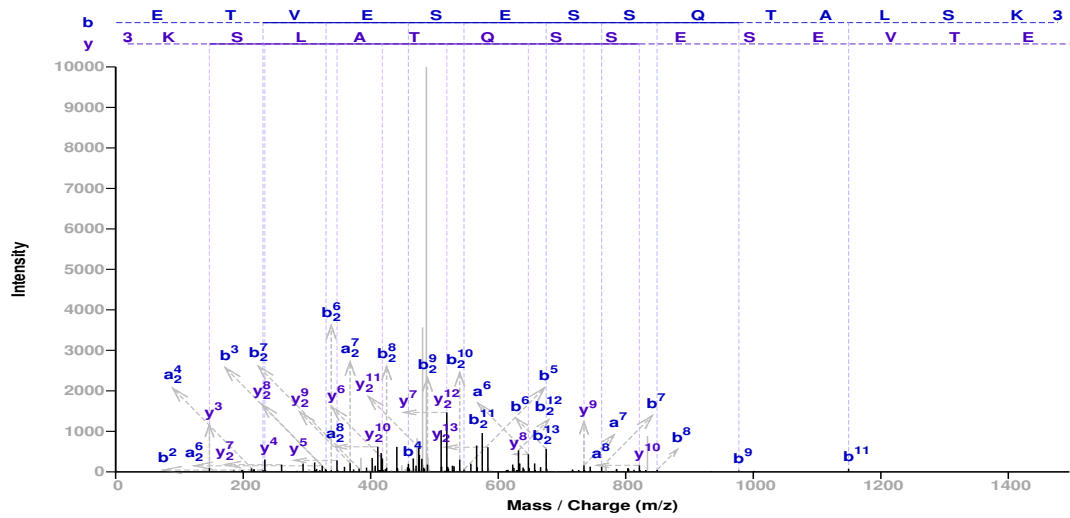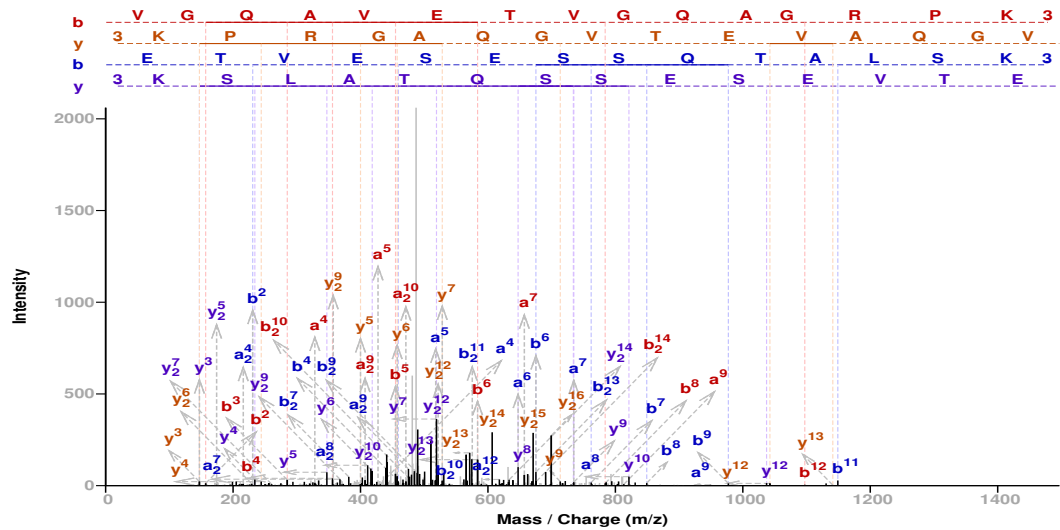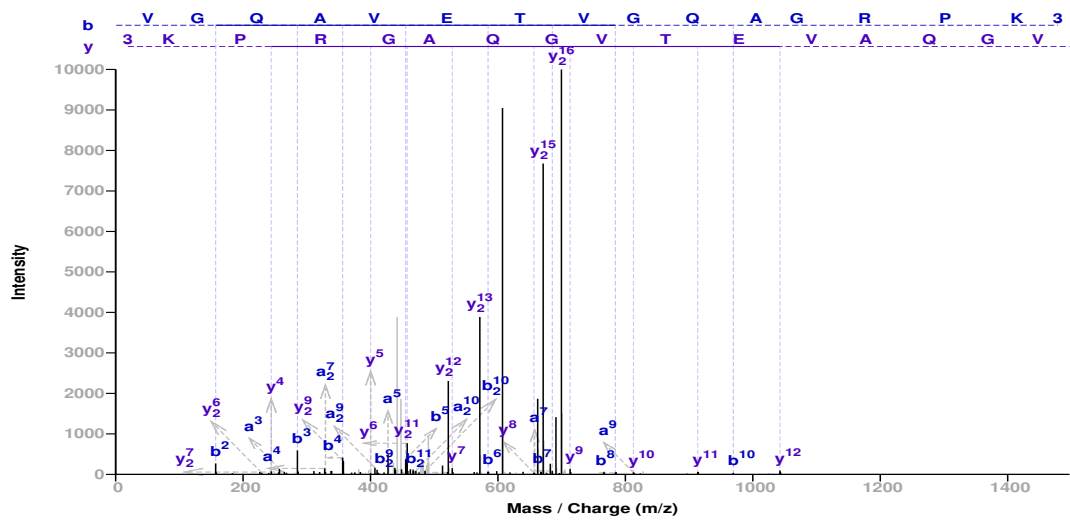

yeast4\_Scan\_Number\_3014 Precursor m/z: 352.215 cosine: 0.936  $\alpha$ : 0.247

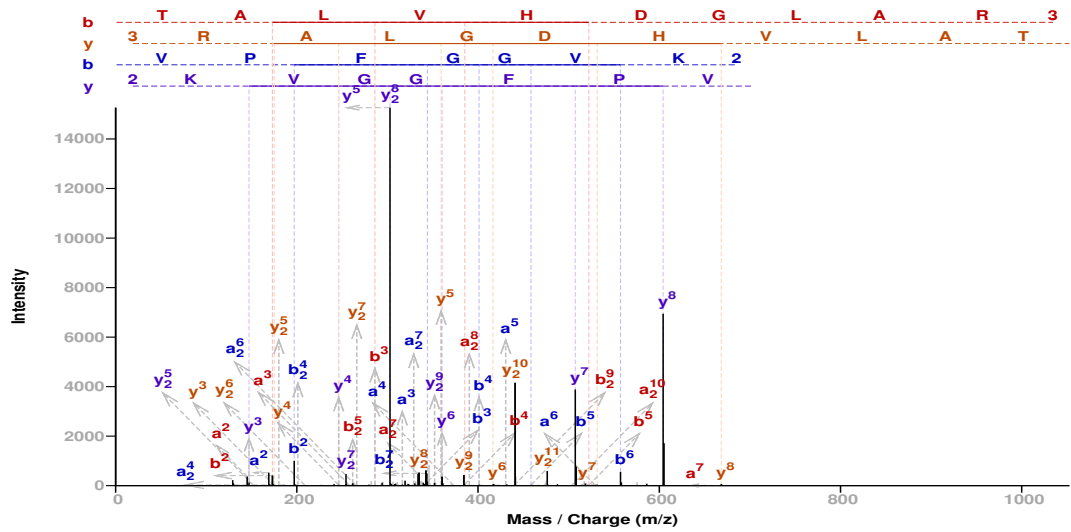



yeast4\_Scan\_Number\_4842 Precursor m/z: 612.344 cosine: 0.772  $\alpha$ : 0.244

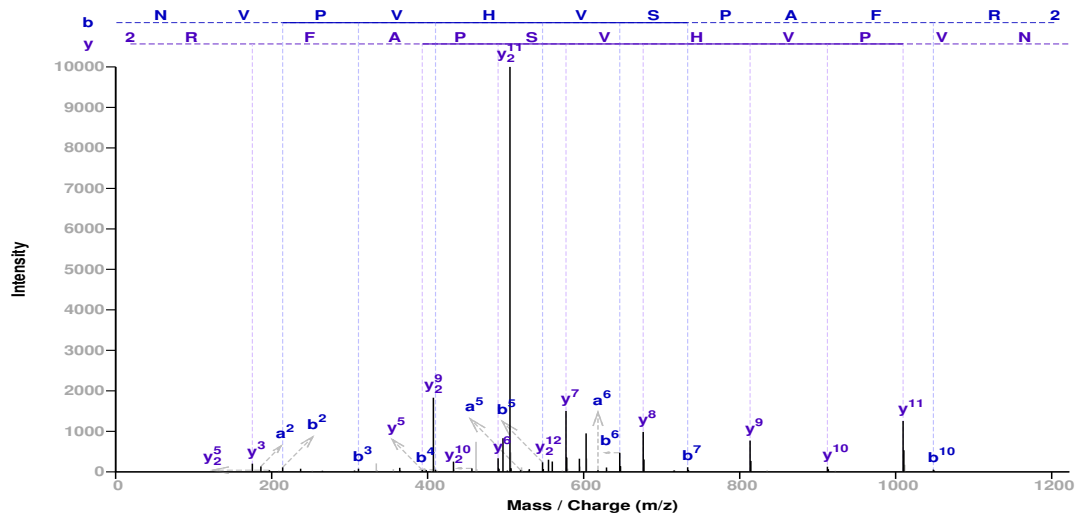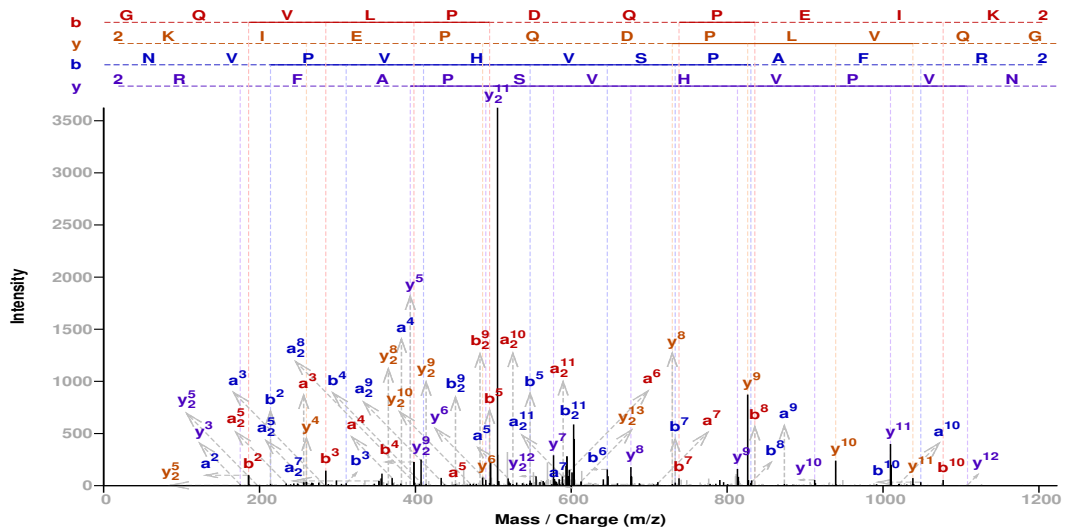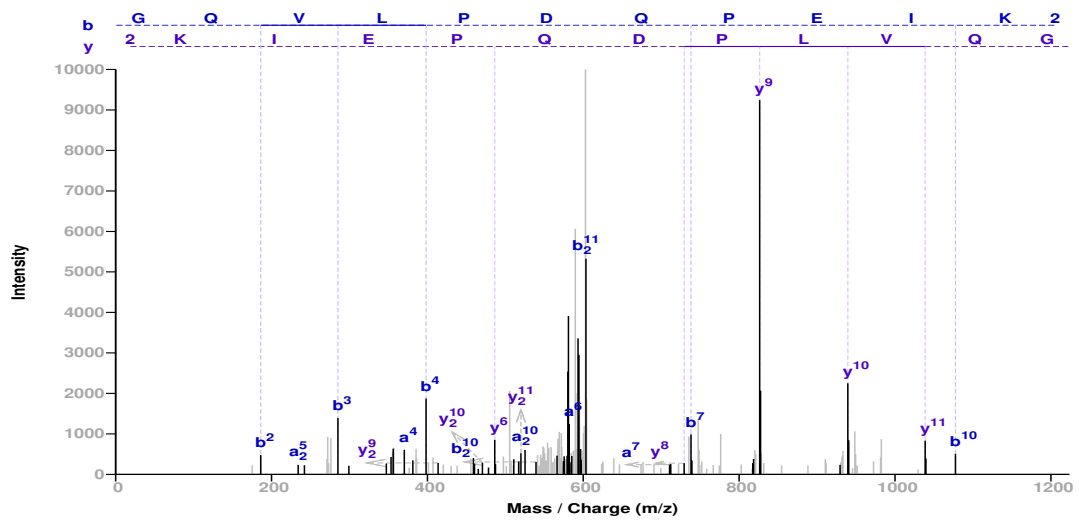

yeast4\_Scan\_Number.1667 Precursor m/z: 540.261 cosine: 0.778  $\alpha$ : 0.240

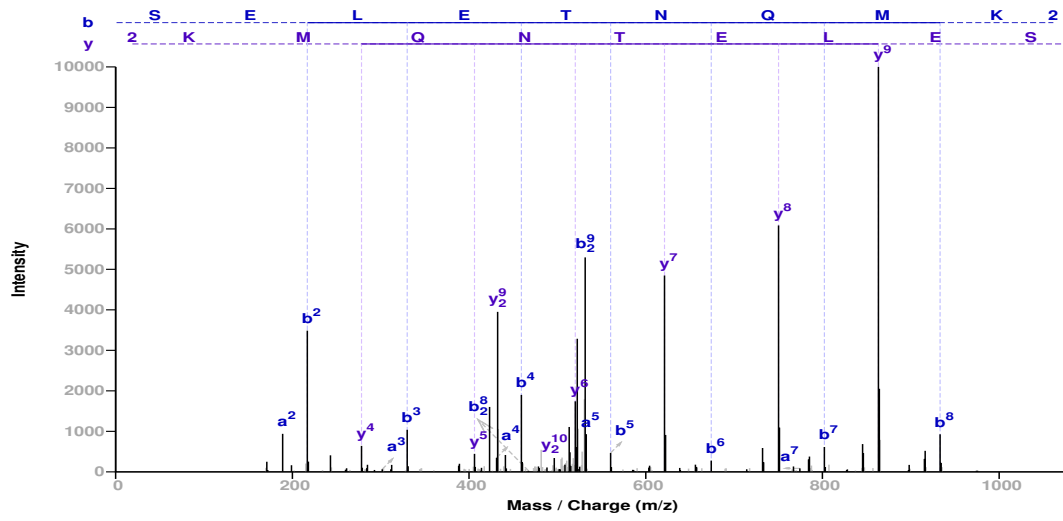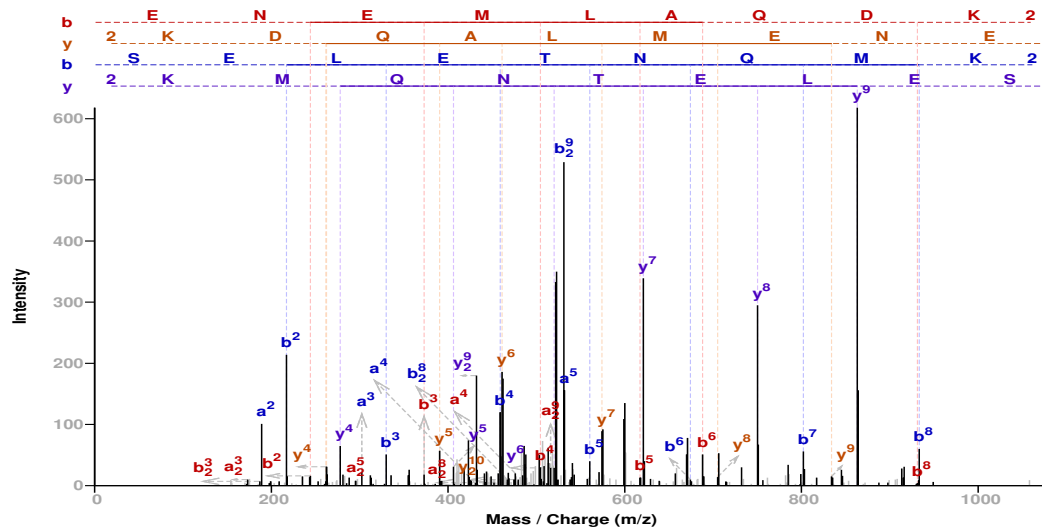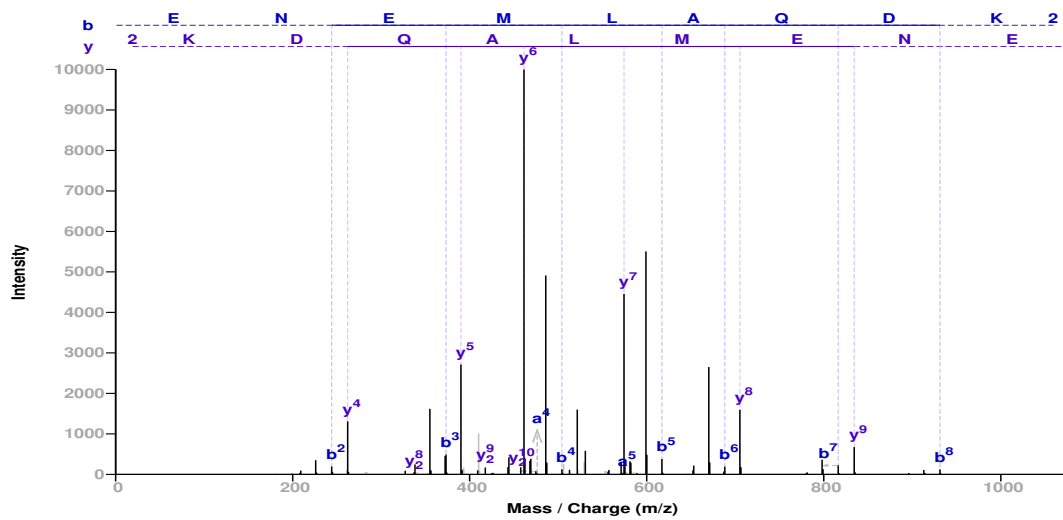

yeast4\_Scan\_Number\_6408 Precursor m/z: 530.767 cosine: 0.874  $\alpha$ : 0.228

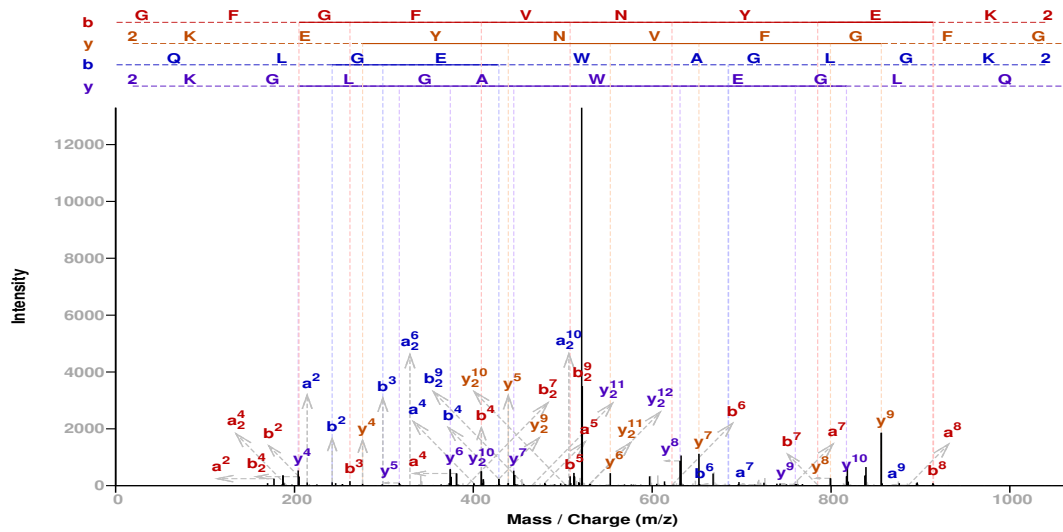

yeast4\_Scan\_Number\_6463 Precursor m/z: 574.327 cosine: 0.785  $\alpha$ : 0.223

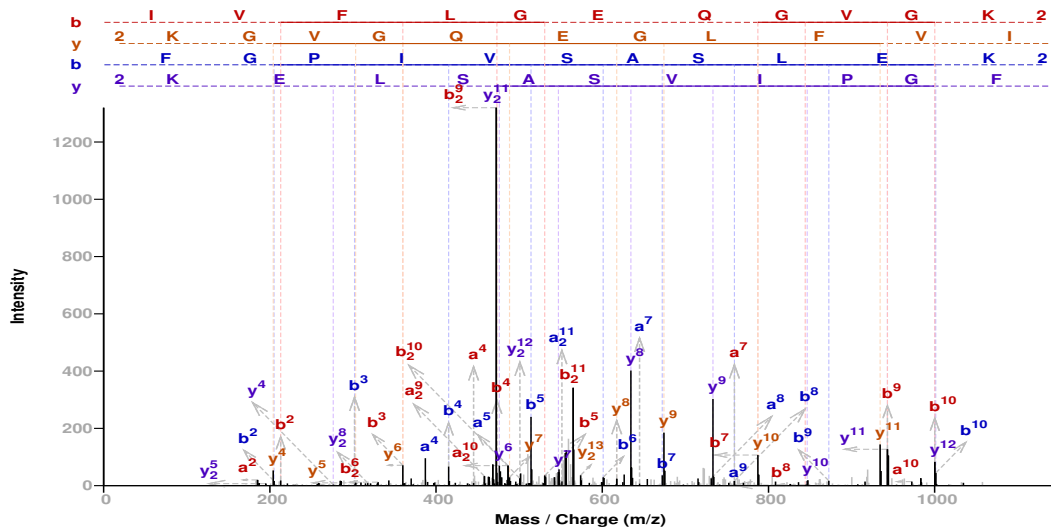

yeast4\_Scan\_Number\_6786 Precursor m/z: 662.865 cosine: 0.803  $\alpha$ : 0.221

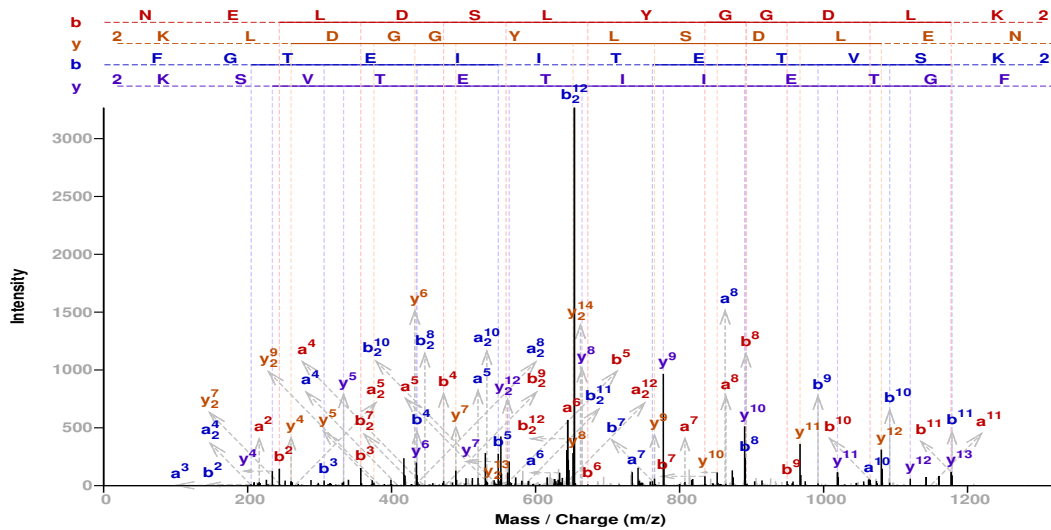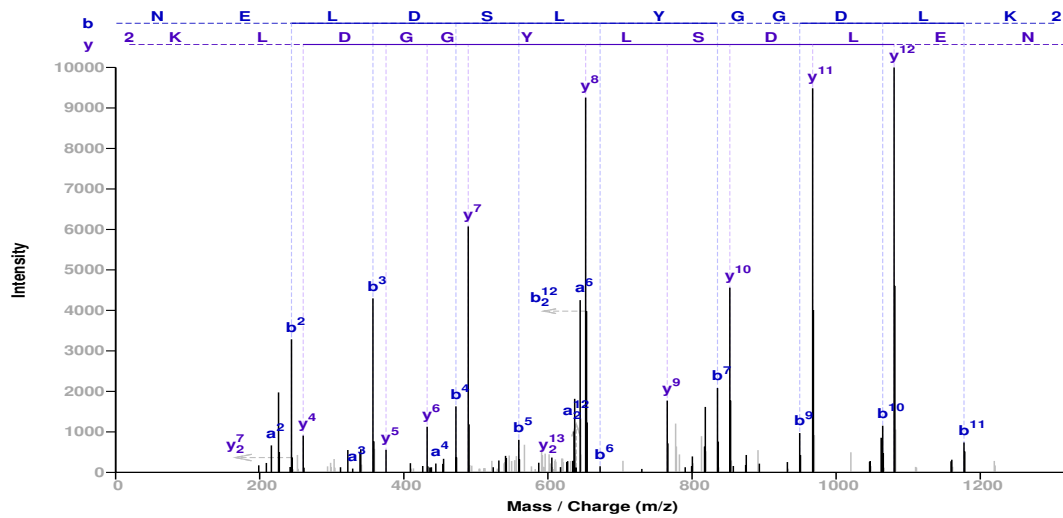

yeast4\_Scan\_Number\_677 Precursor m/z: 457.224 cosine: 0.752  $\alpha$ : 0.219

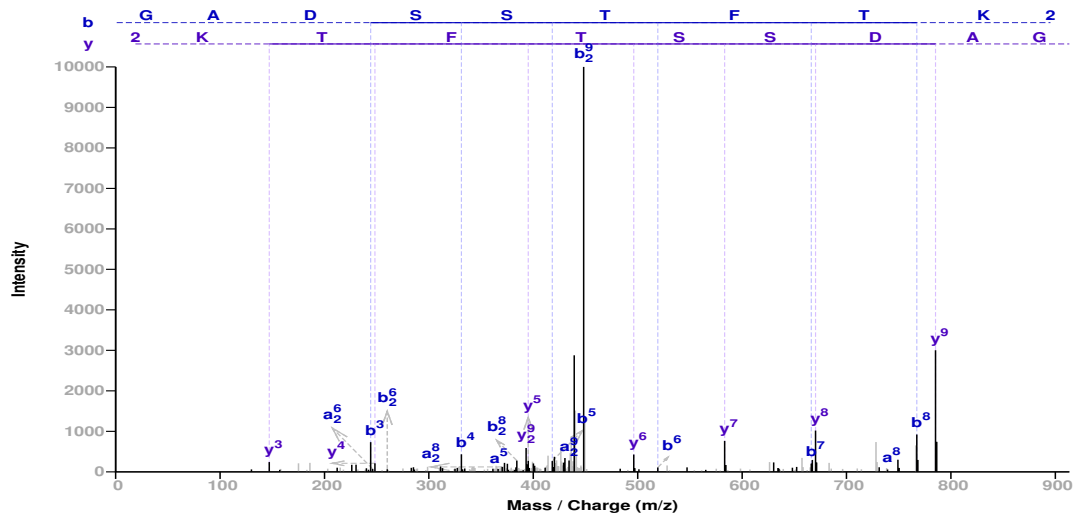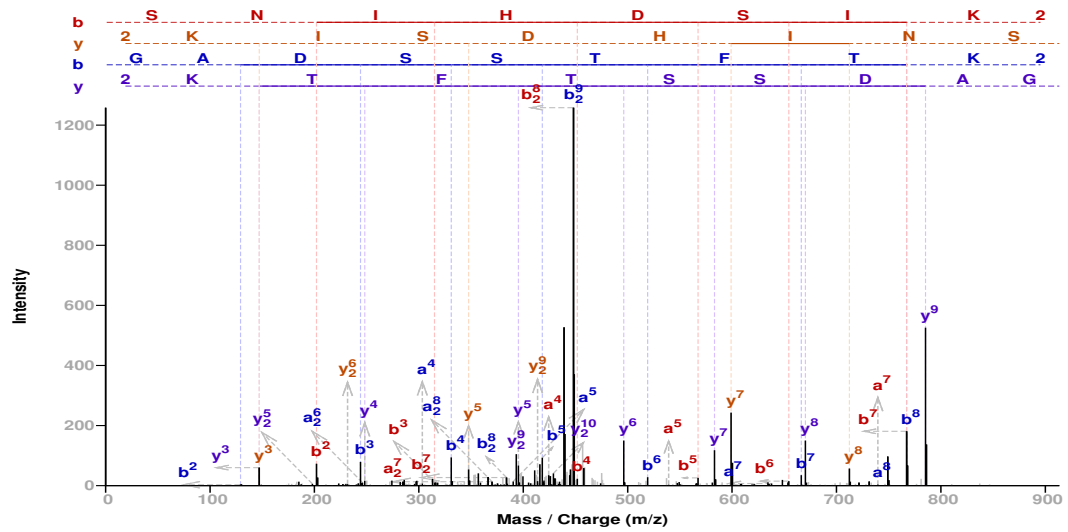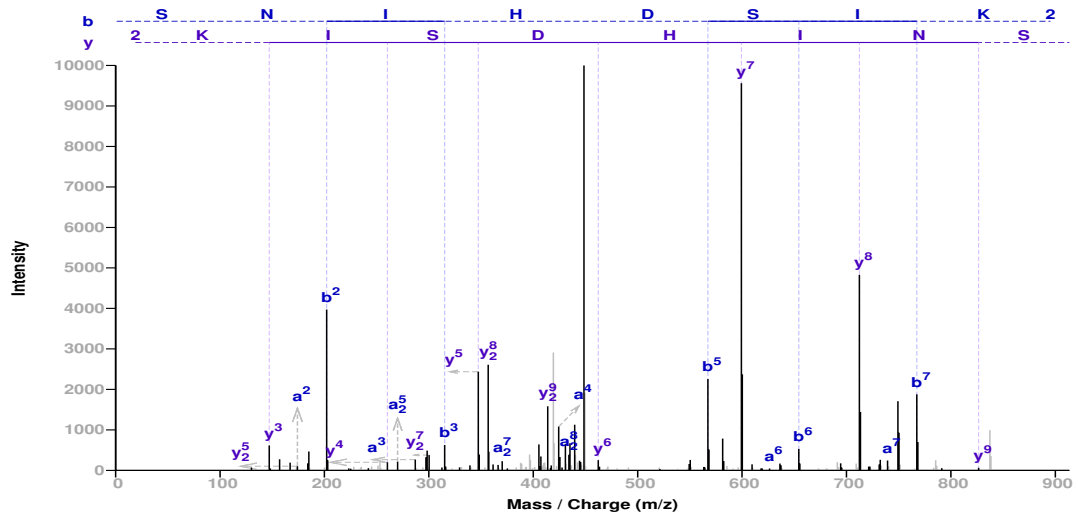

yeast4\_Scan\_Number\_1195 Precursor m/z: 355.705 cosine: 0.785  $\alpha$ : 0.217

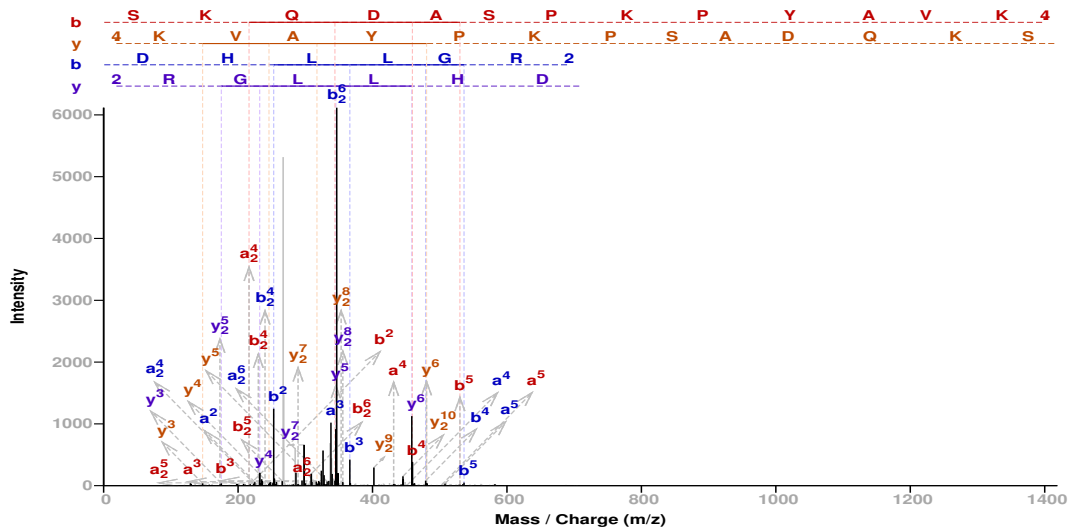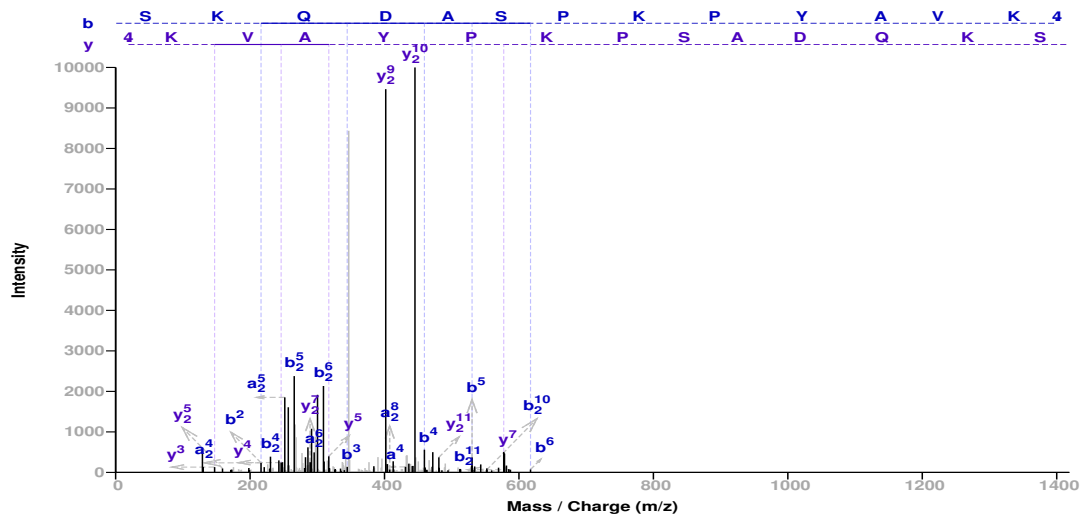

yeast4\_Scan\_Number\_3888 Precursor m/z: 508.296 cosine: 0.806  $\alpha$ : 0.212

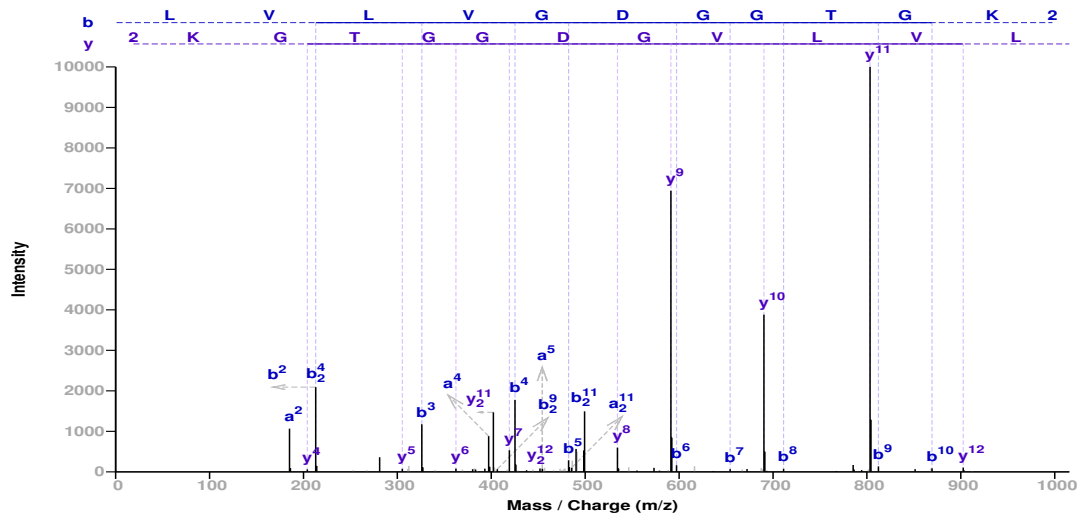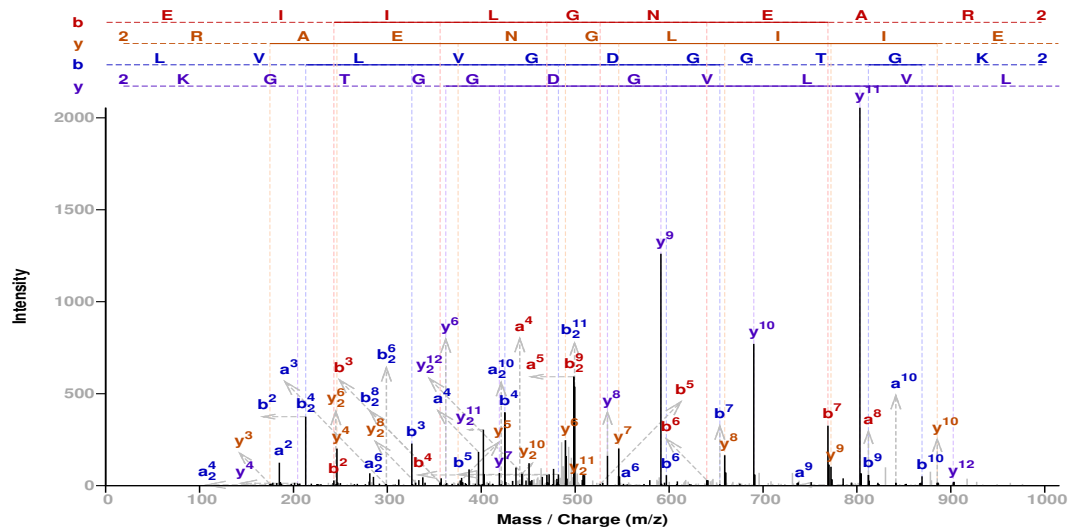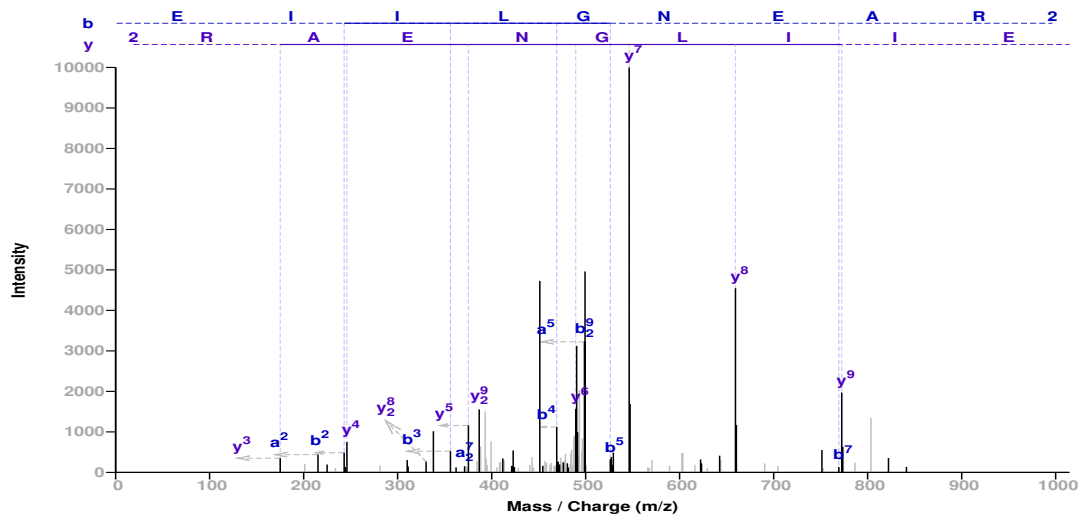



yeast4.Scan\_Number\_2539 Precursor m/z: 409.229 cosine: 0.948  $\alpha$ : 0.212

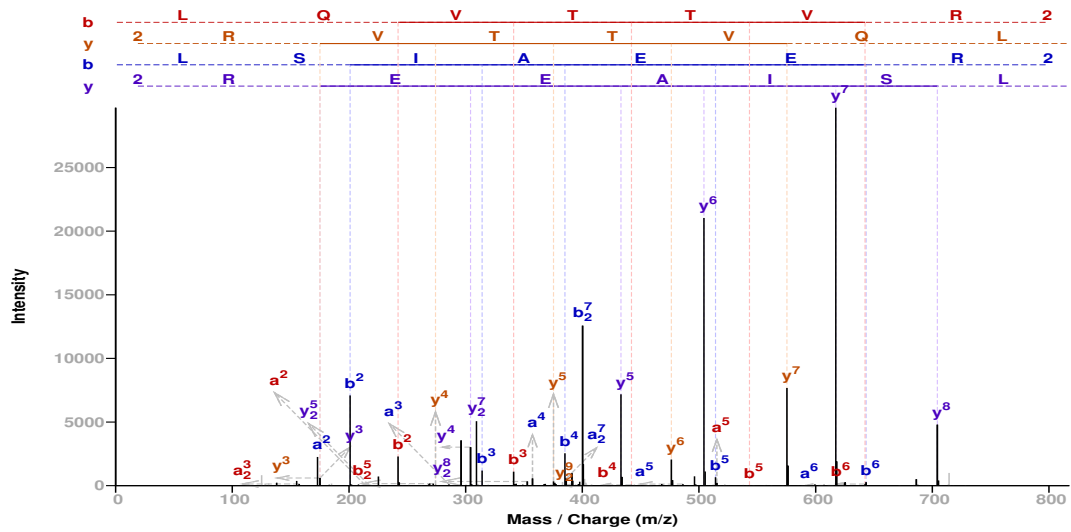

yeast4.Scan\_Number\_3577 Precursor m/z: 509.817 cosine: 0.779  $\alpha$ : 0.204

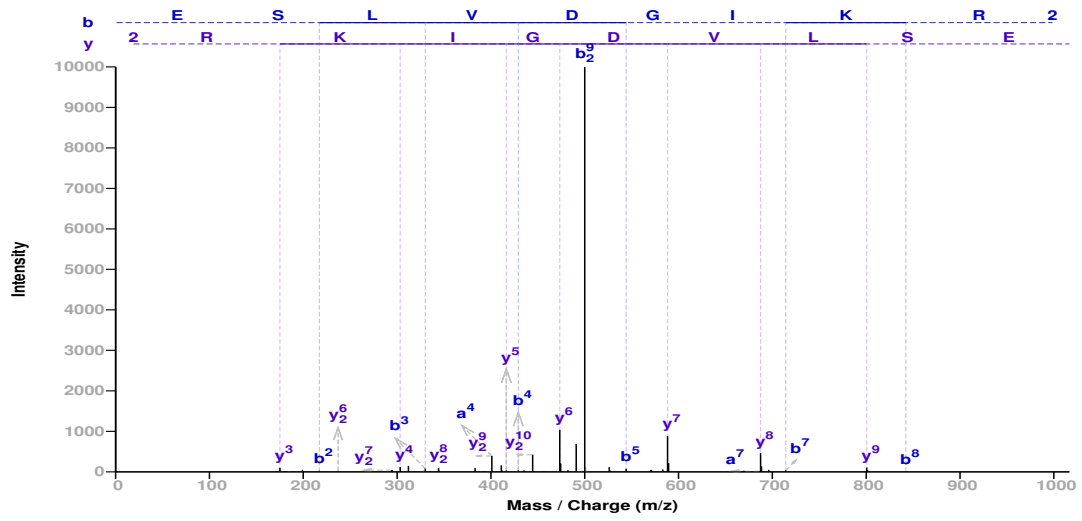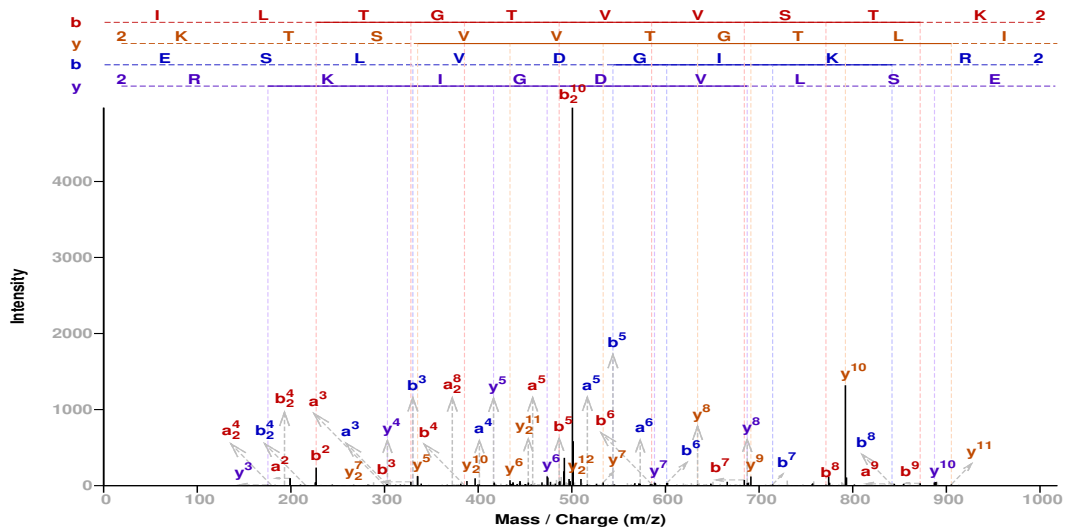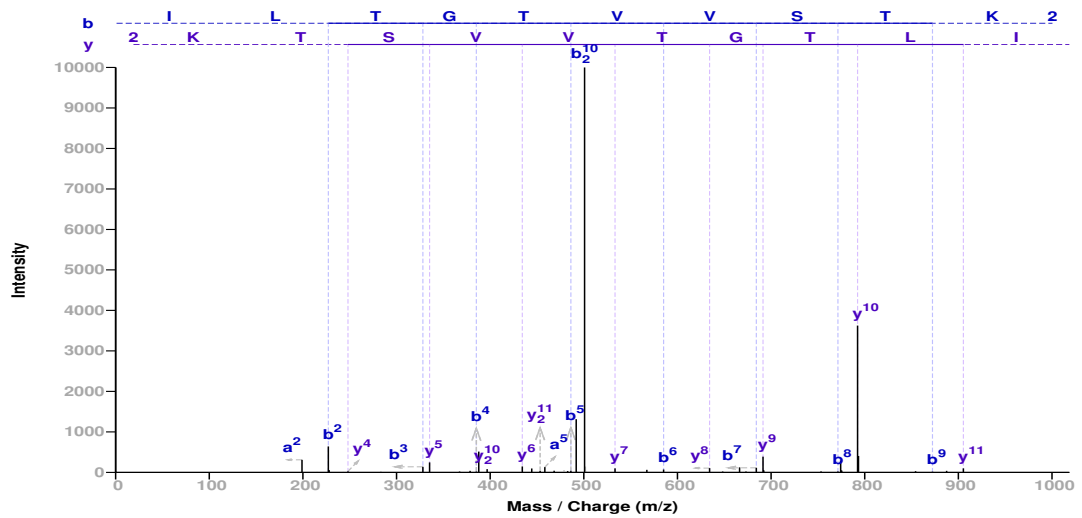

yeast4\_Scan\_Number\_4280 Precursor m/z: 398.218 cosine: 0.844  $\alpha$ : 0.203

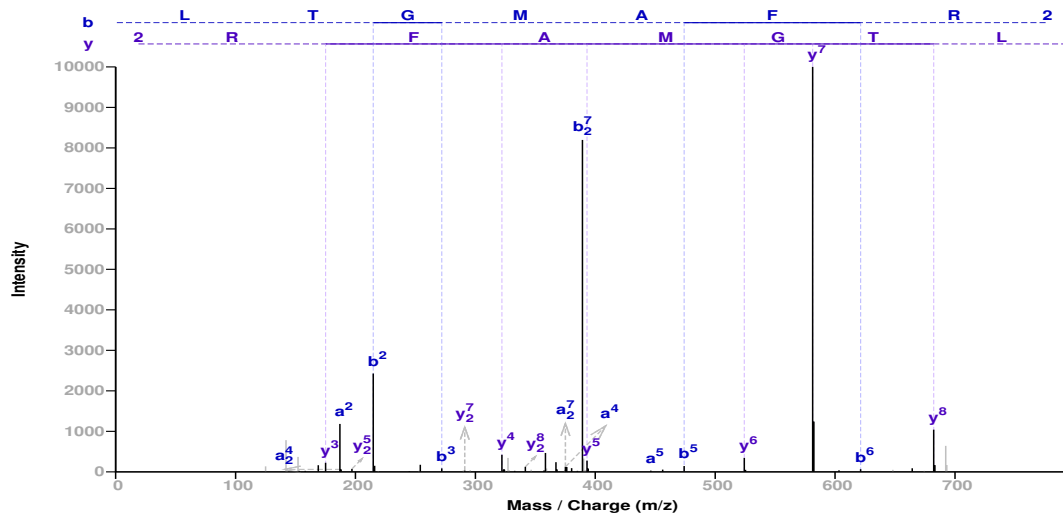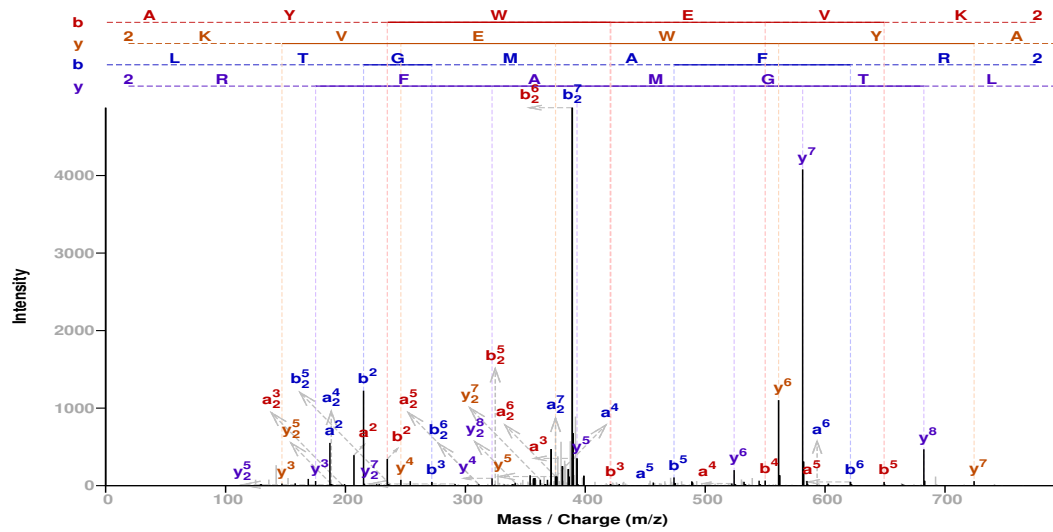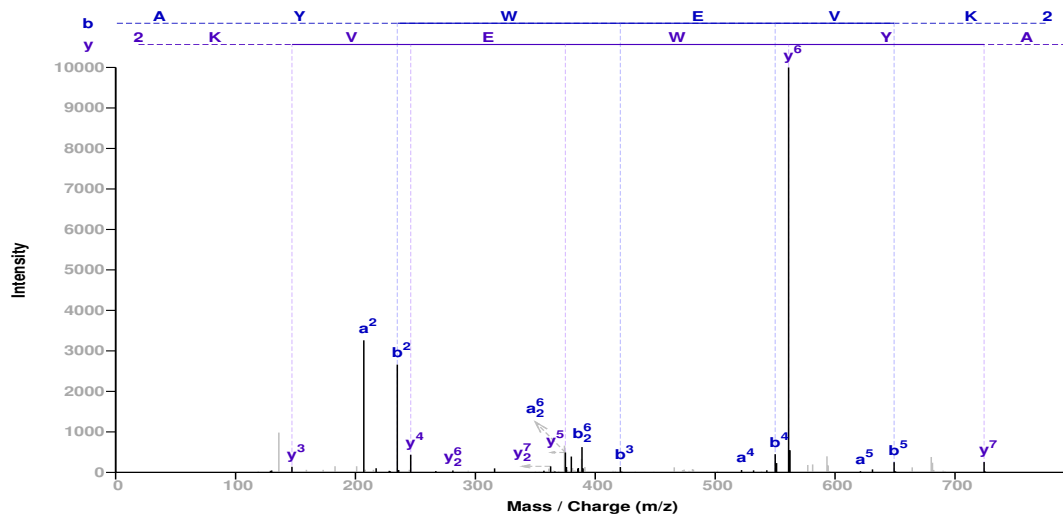

yeast4\_Scan\_Number\_4834 Precursor m/z: 463.295 cosine: 0.814  $\alpha$ : 0.201

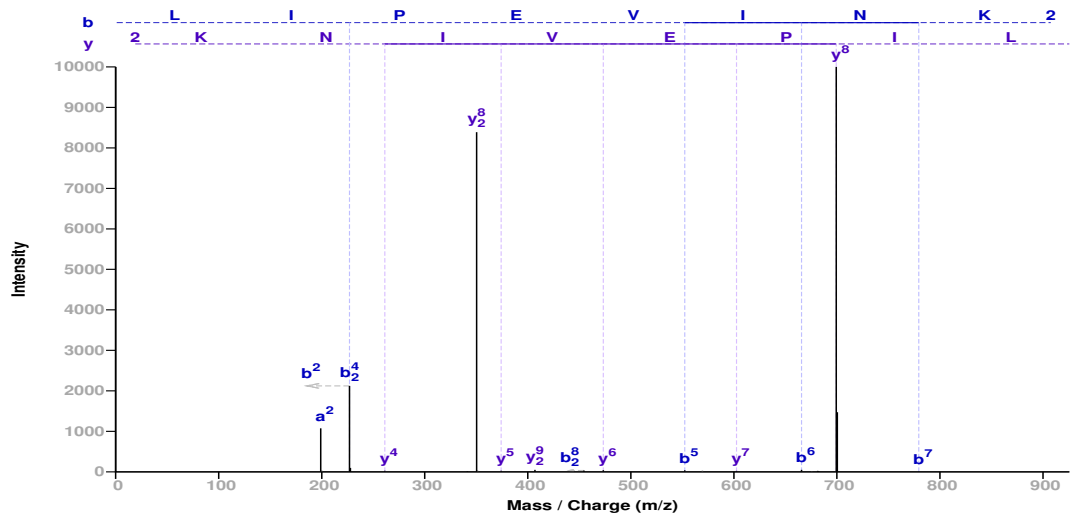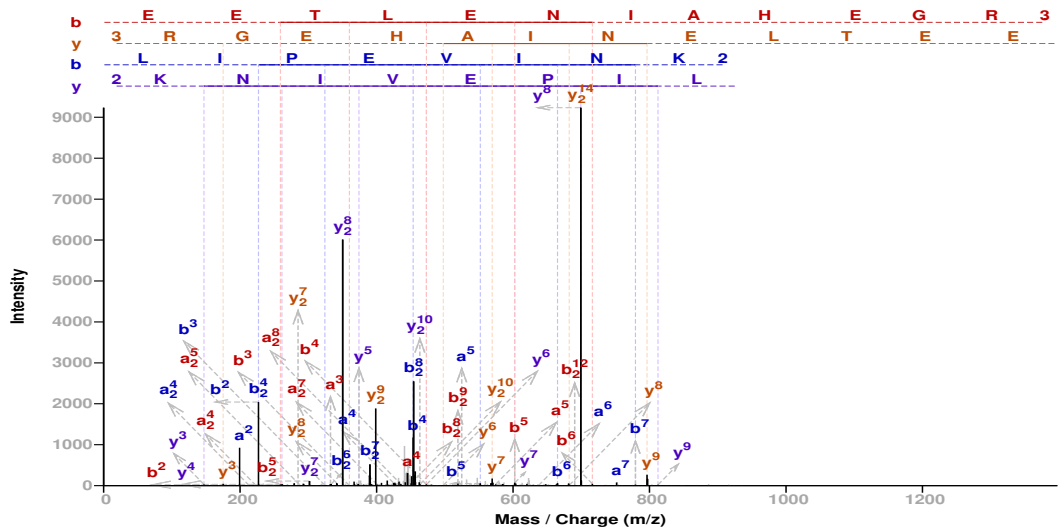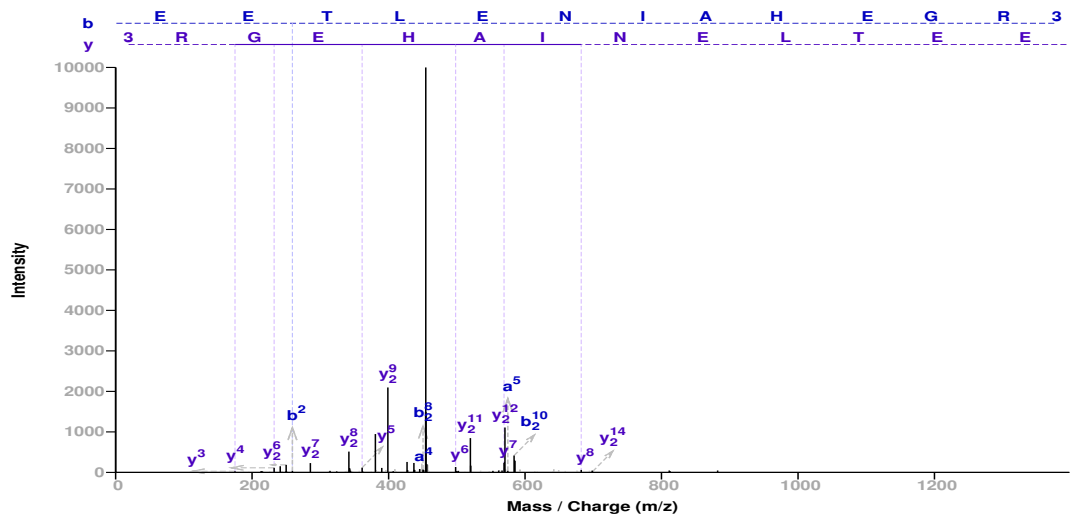

yeast4\_Scan\_Number\_2356 Precursor m/z: 520.262 cosine: 0.855  $\alpha$ : 0.197

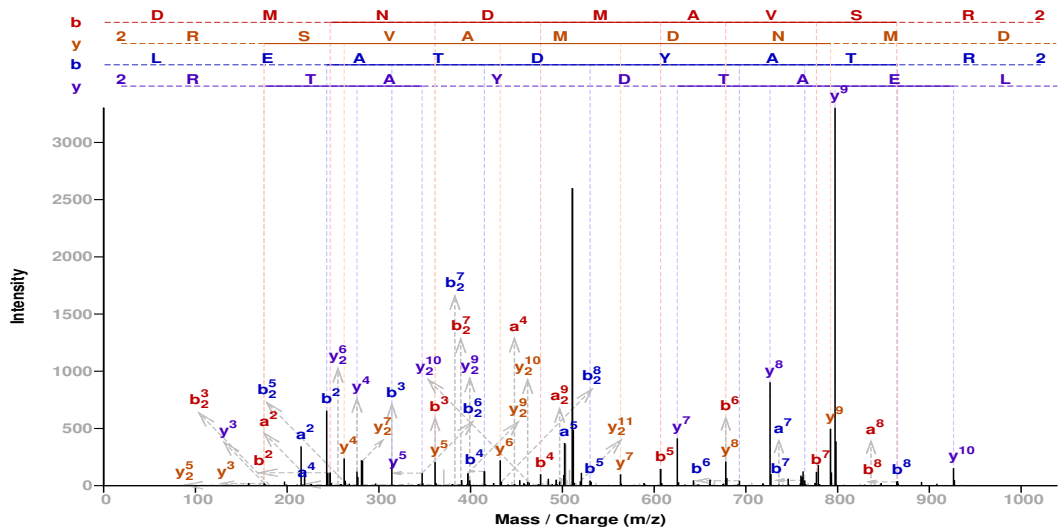

yeast4.Scan\_Number.1765 Precursor m/z: 458.273 cosine: 0.815  $\alpha$ : 0.191

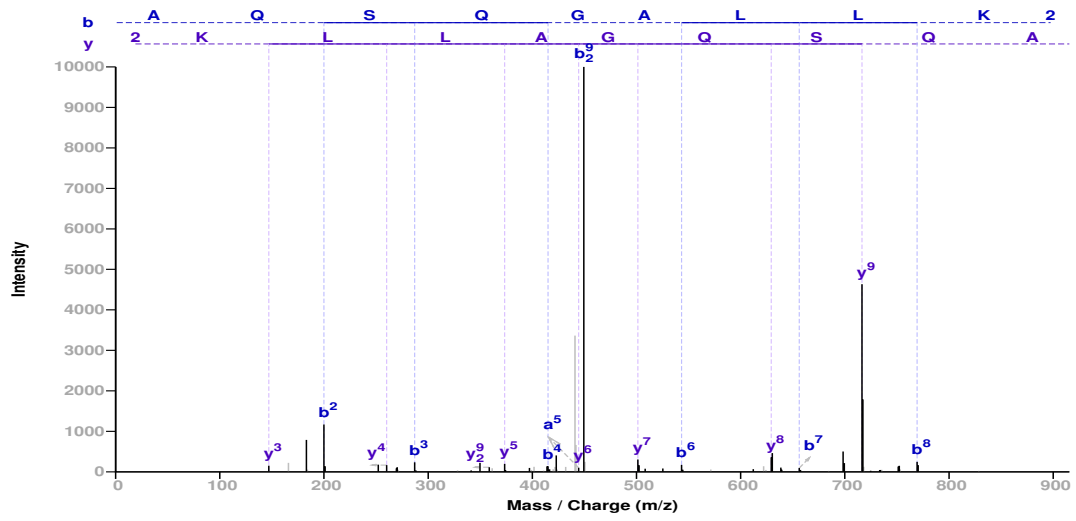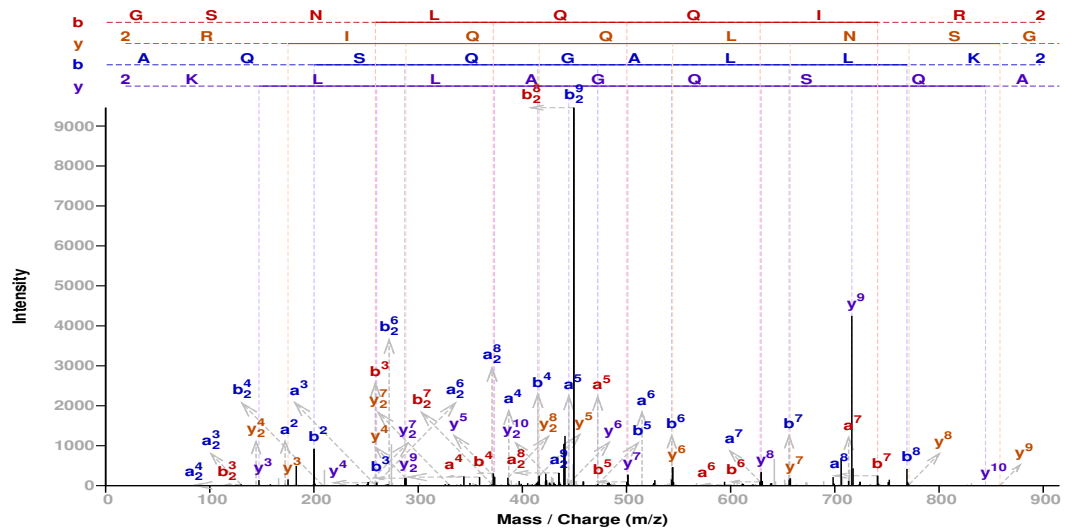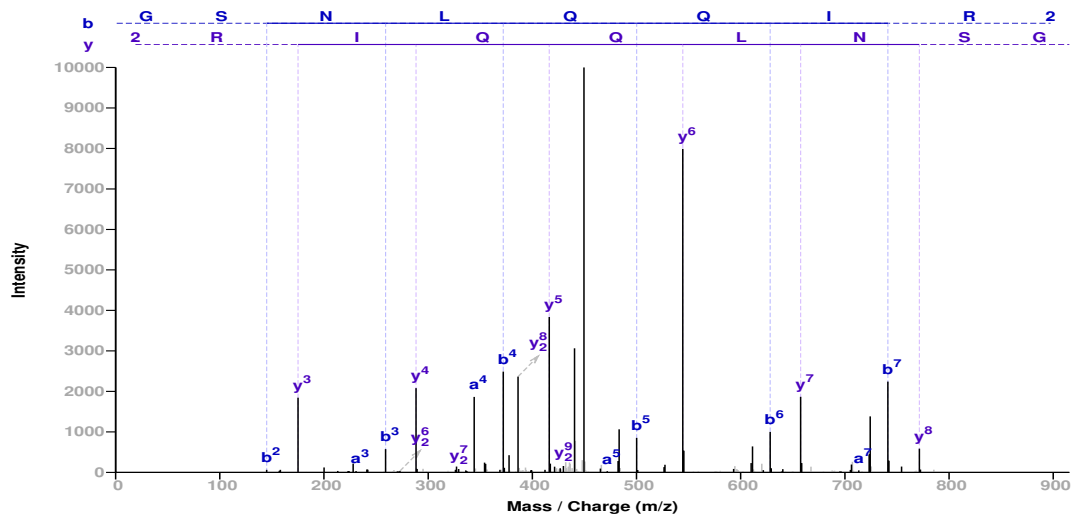



yeast4\_Scan\_Number\_6202 Precursor m/z: 598.823 cosine: 0.790  $\alpha$ : 0.188

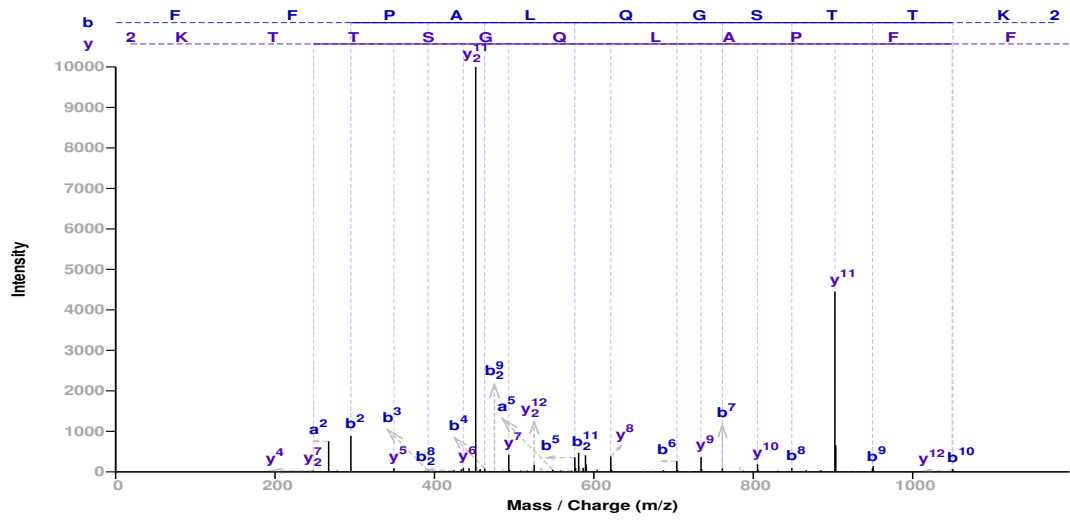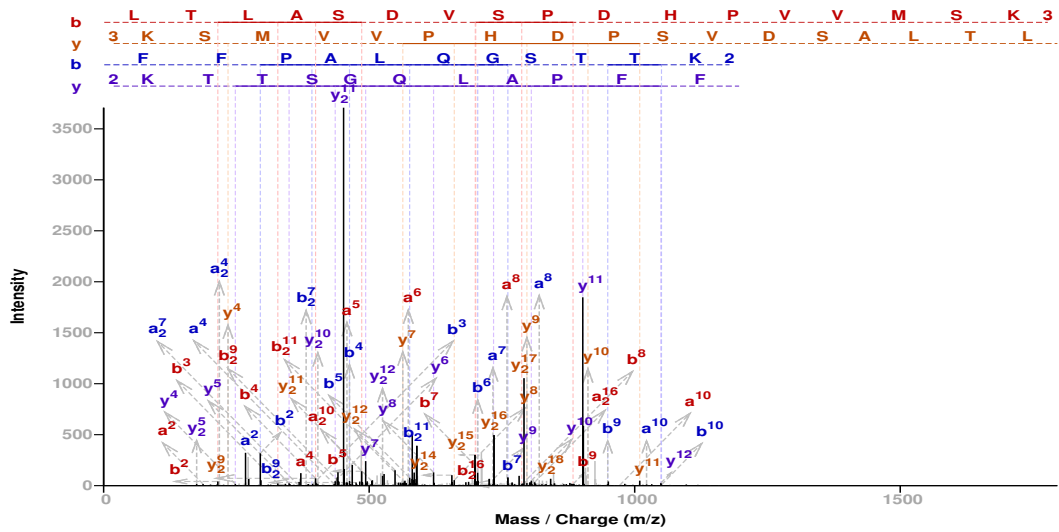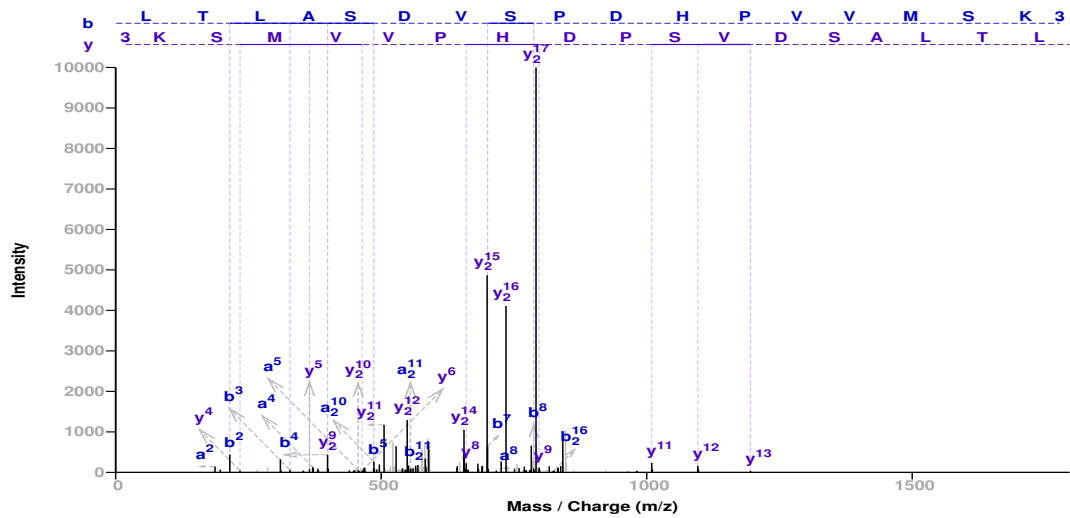



yeast4\_Scan\_Number\_1600 Precursor m/z: 552.294 cosine: 0.802  $\alpha$ : 0.187

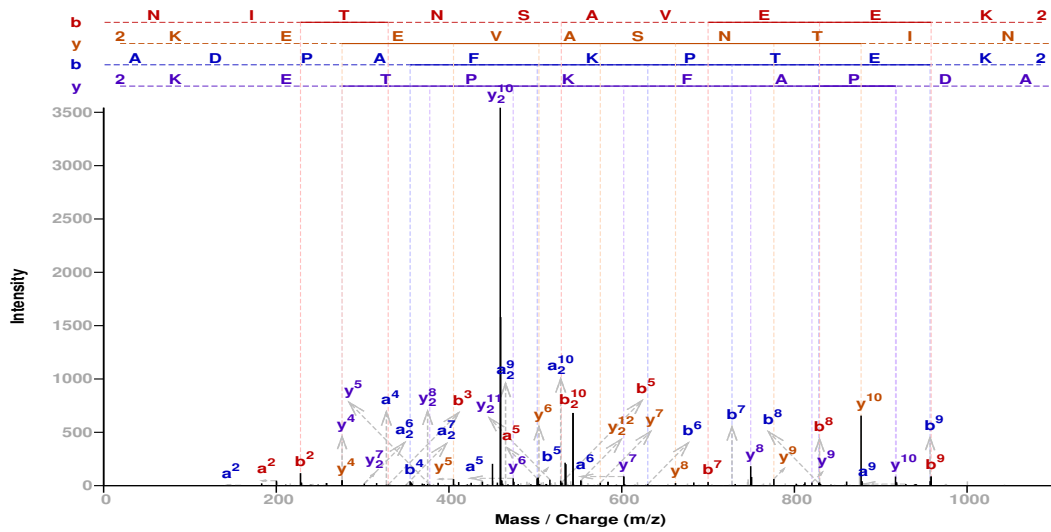

yeast4\_Scan\_Number\_1017 Precursor m/z: 422.740 cosine: 0.793  $\alpha$ : 0.185

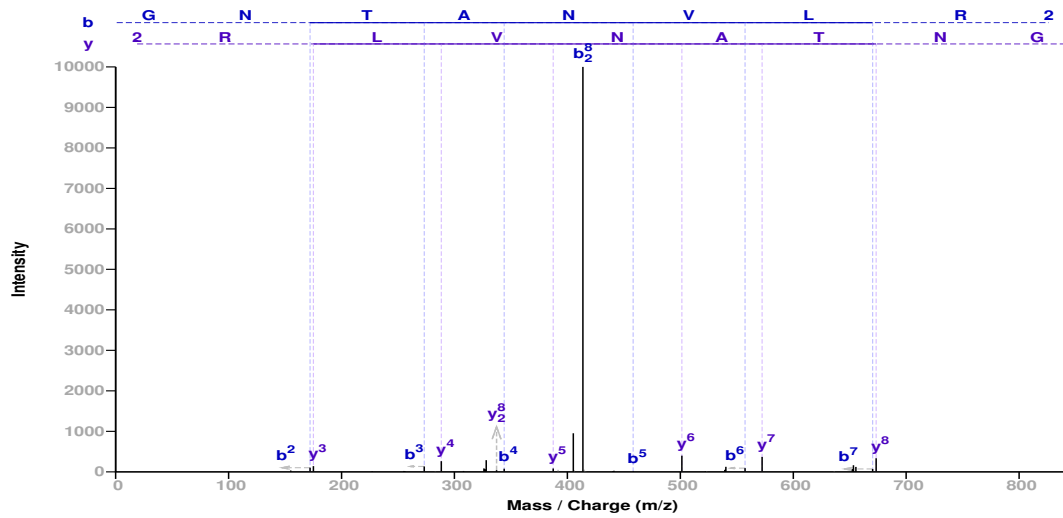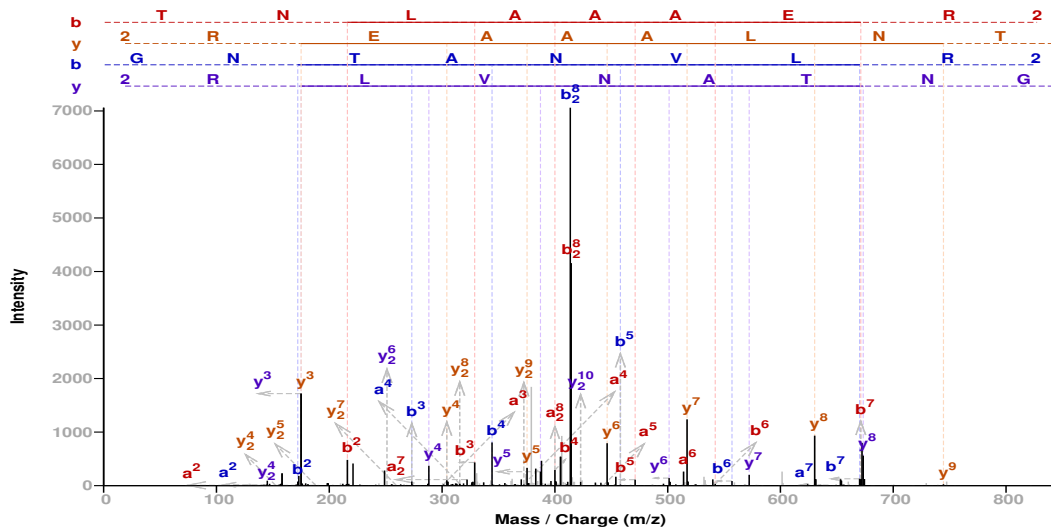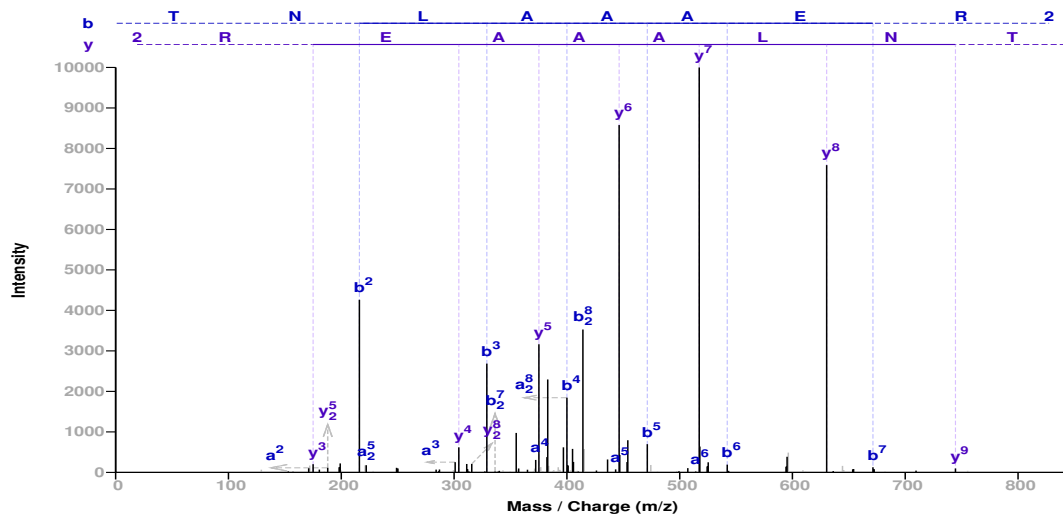

yeast4\_Scan\_Number\_4023 Precursor m/z: 557.783 cosine: 0.789  $\alpha$ : 0.179

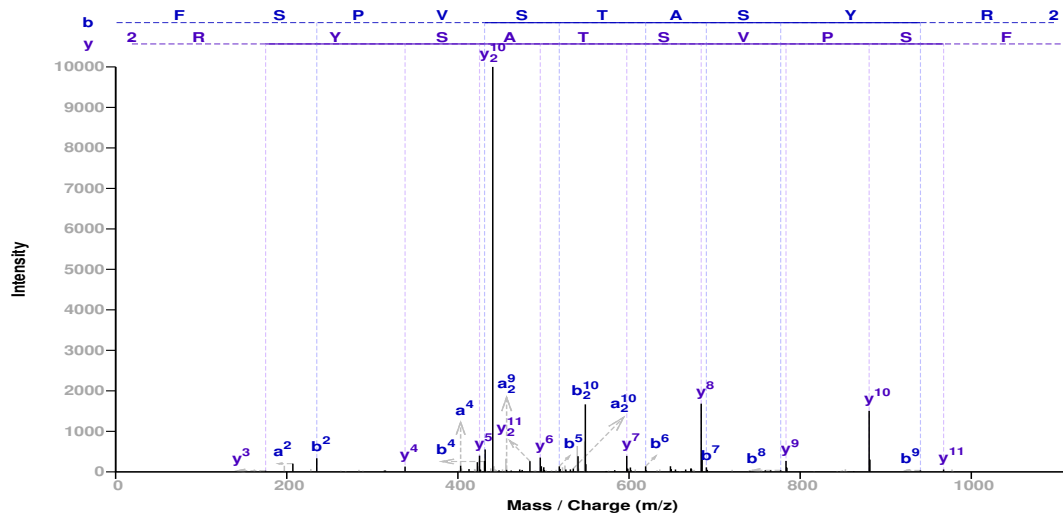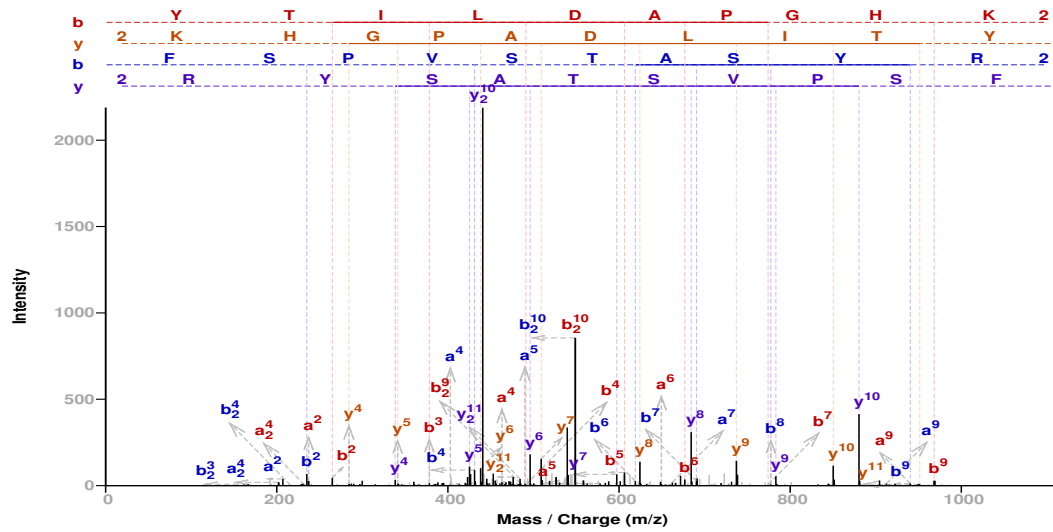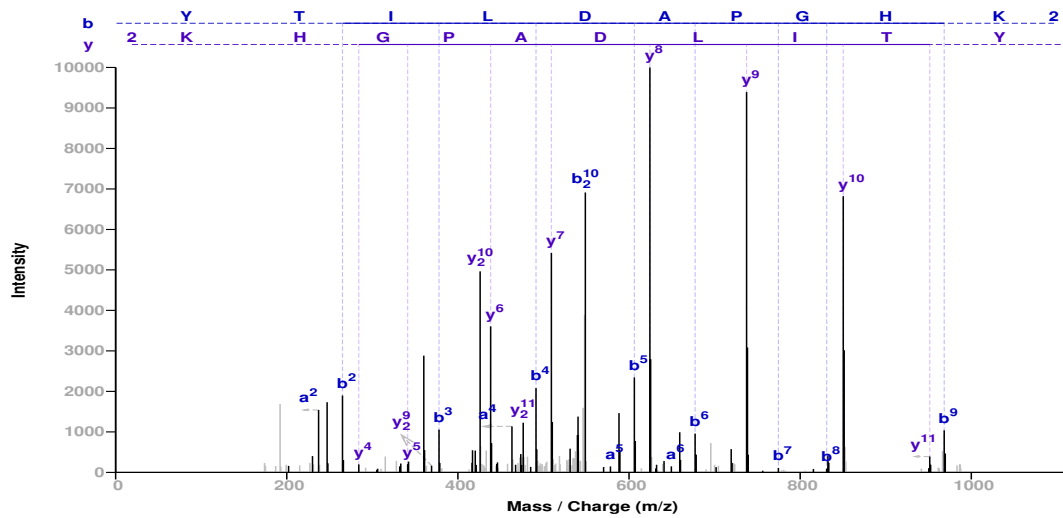

yeast4\_Scan\_Number\_3210 Precursor m/z: 493.933 cosine: 0.827  $\alpha$ : 0.171

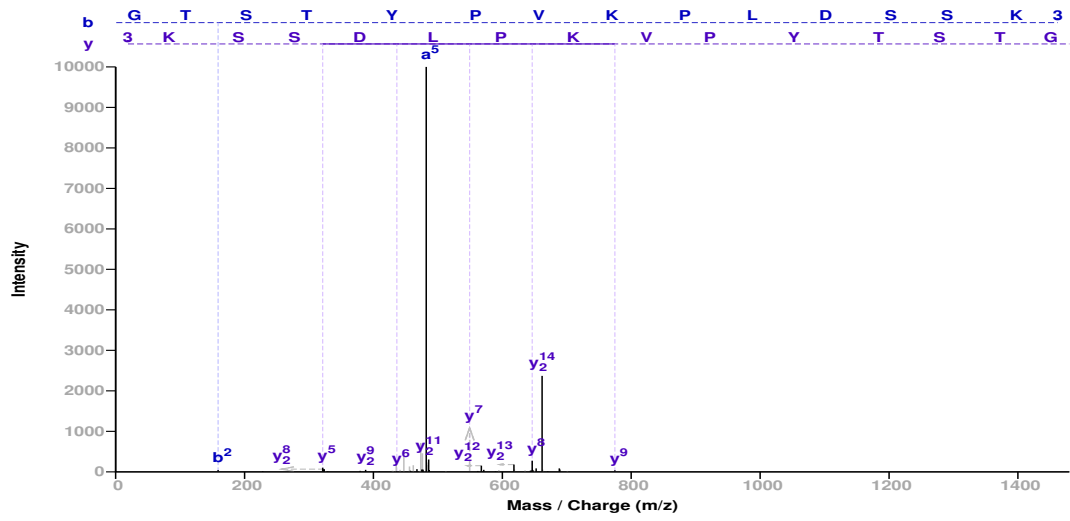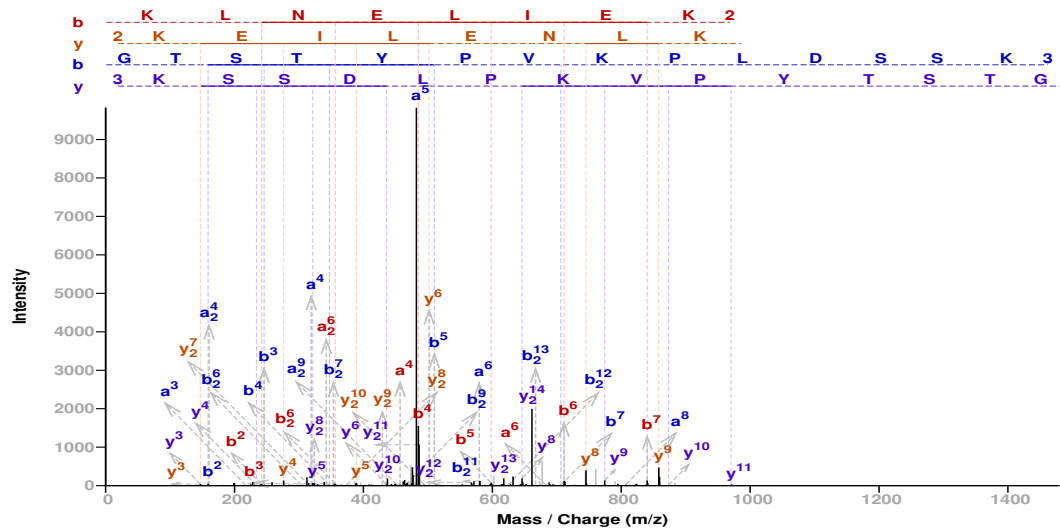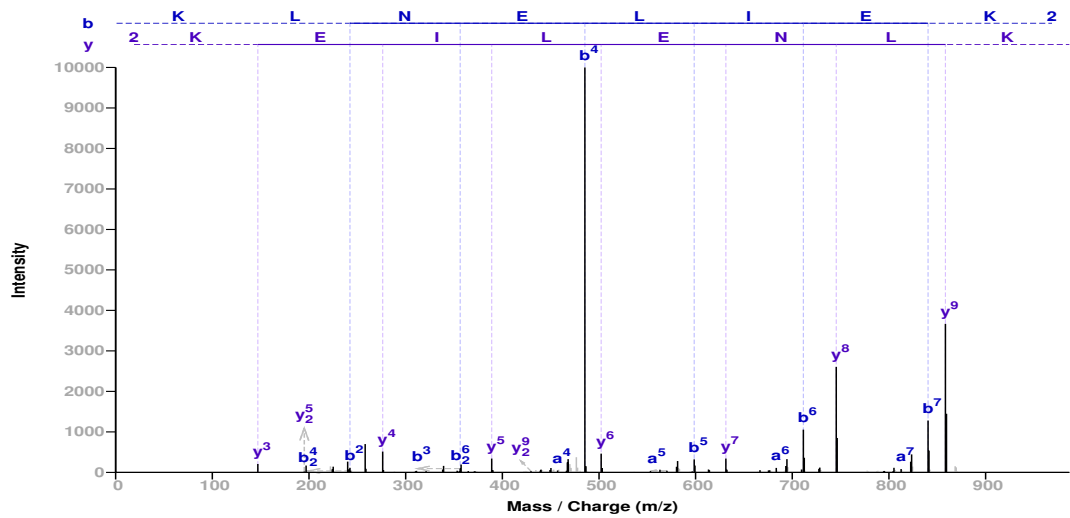

yeast4\_Scan\_Number\_5499 Precursor m/z: 328.743 cosine: 0.839  $\alpha$ : 0.164

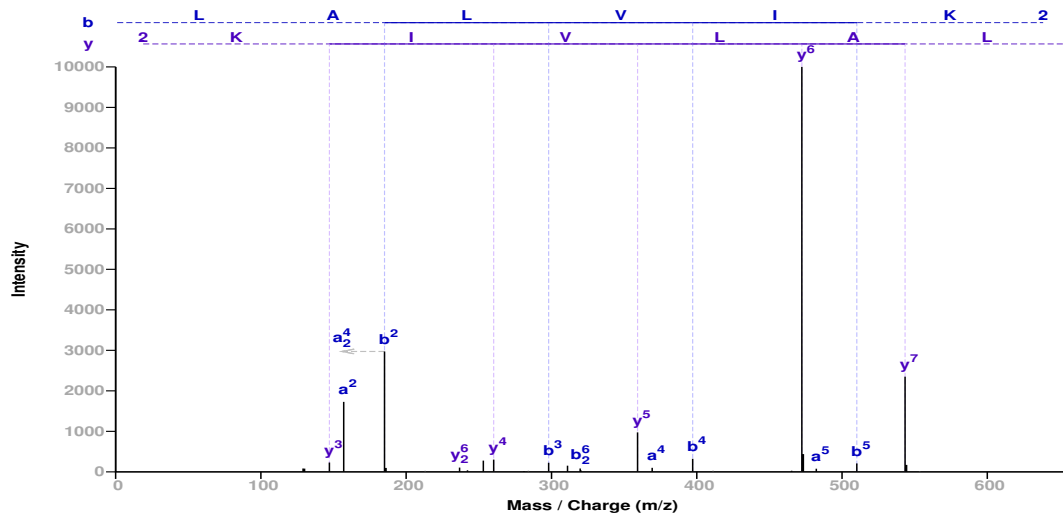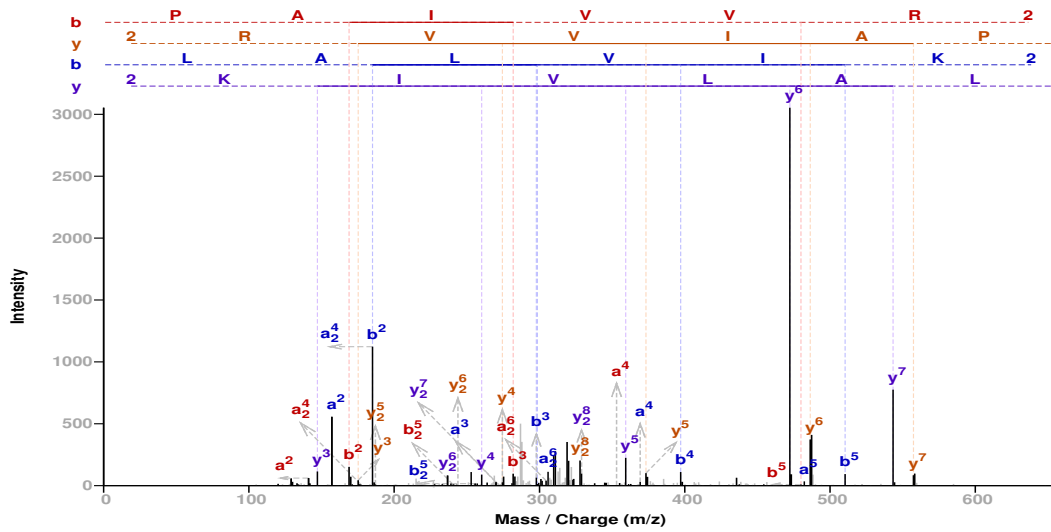

yeast4\_Scan\_Number\_4198 Precursor m/z: 440.771 cosine: 0.806  $\alpha$ : 0.153

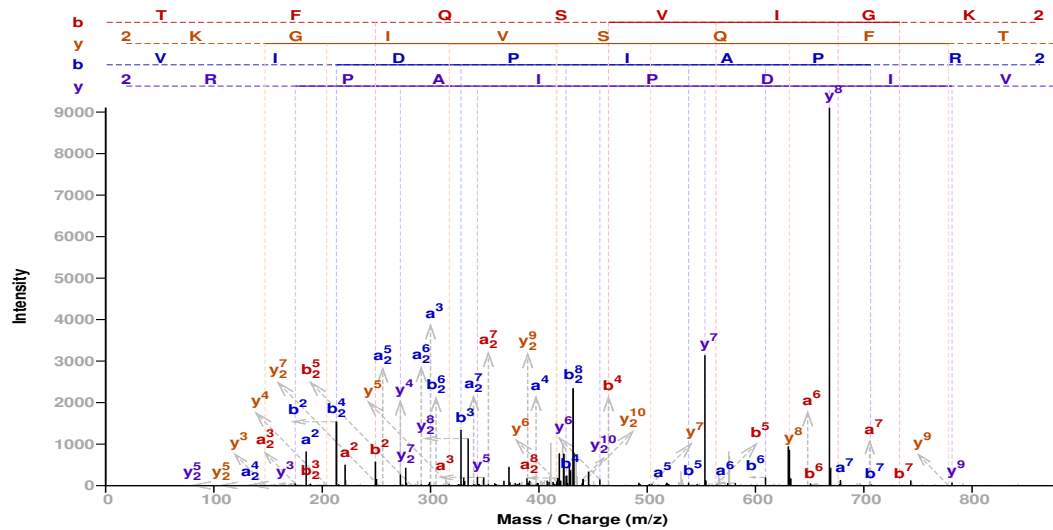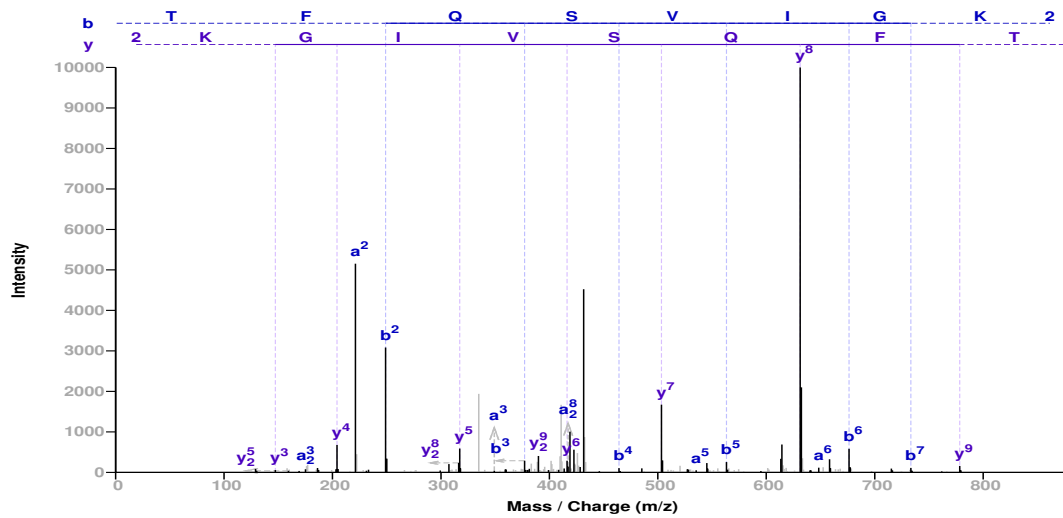

yeast4\_Scan\_Number\_7166 Precursor m/z: 446.762 cosine: 0.930  $\alpha$ : 0.152

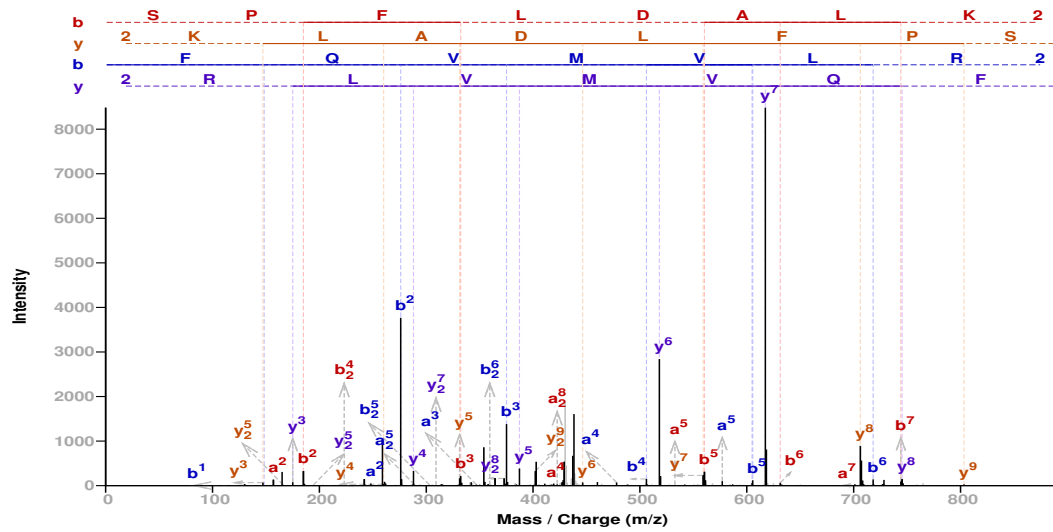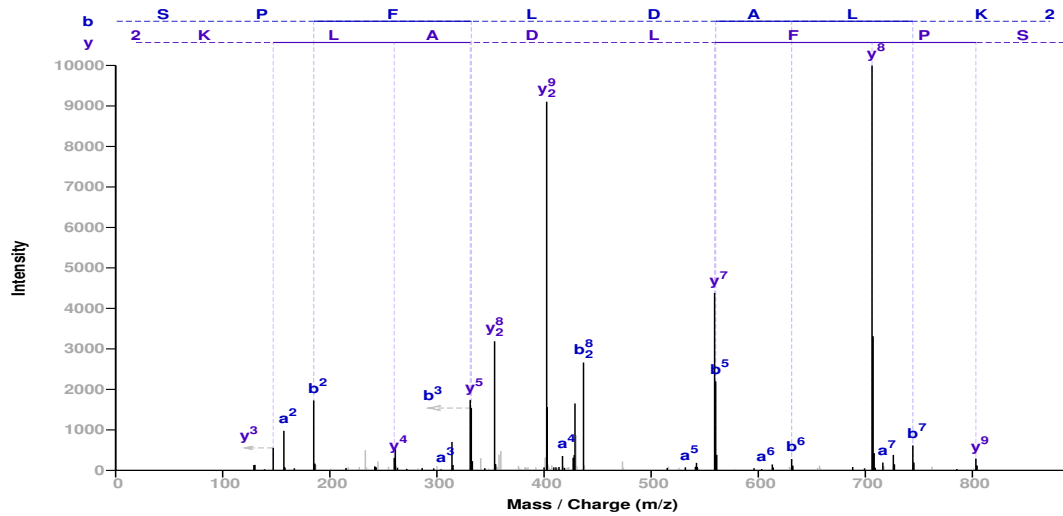

yeast4\_Scan\_Number\_862 Precursor m/z: 552.296 cosine: 0.784  $\alpha$ : 0.135

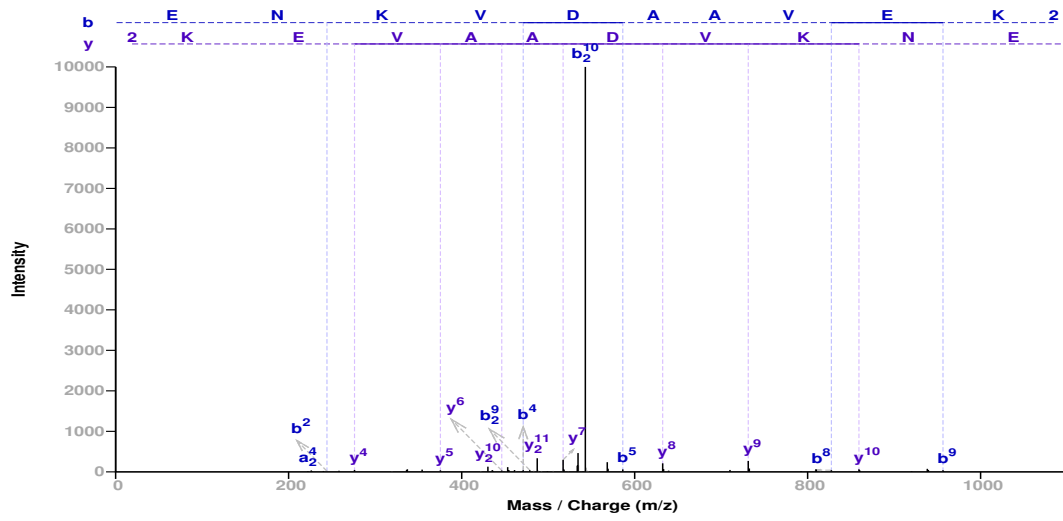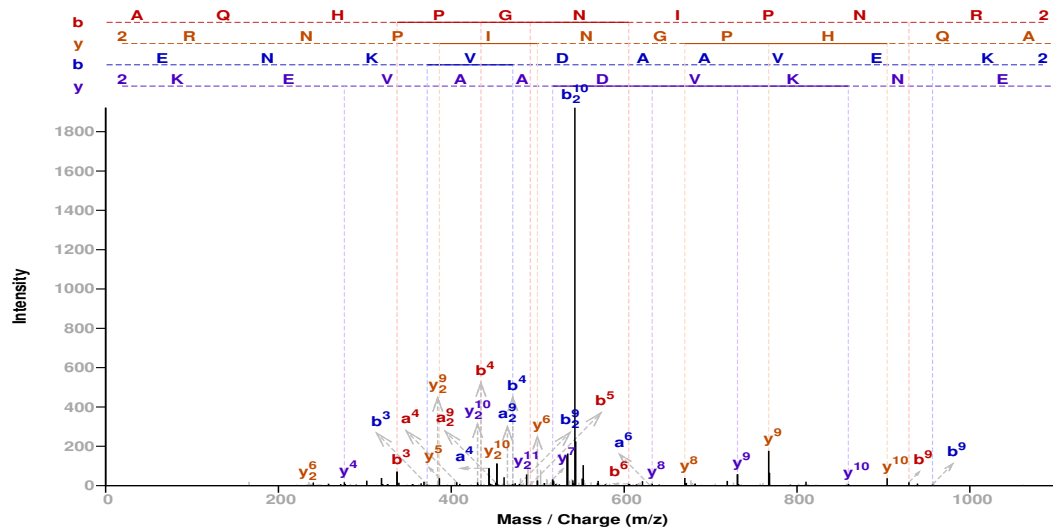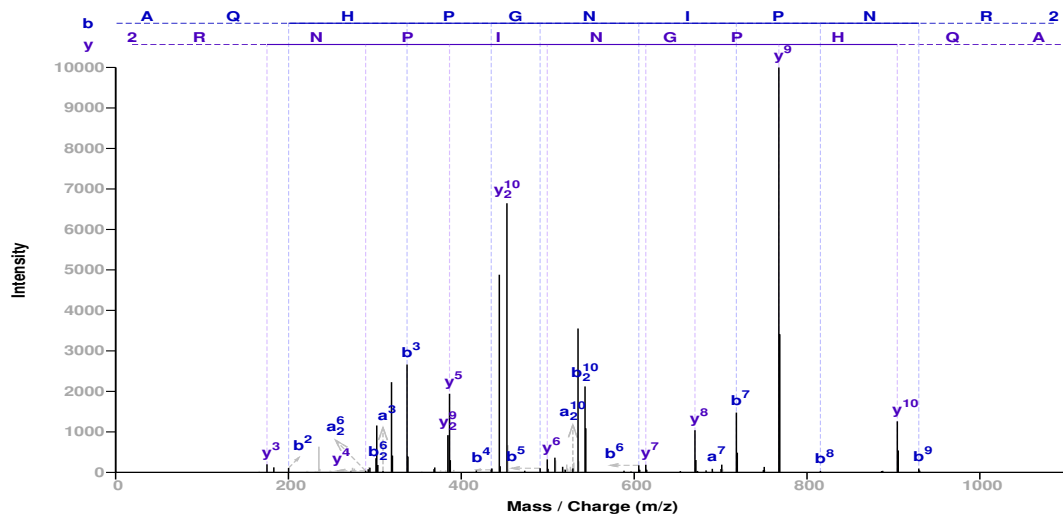



yeast4\_Scan\_Number\_3820 Precursor m/z: 442.271 cosine: 0.829  $\alpha$ : 0.134

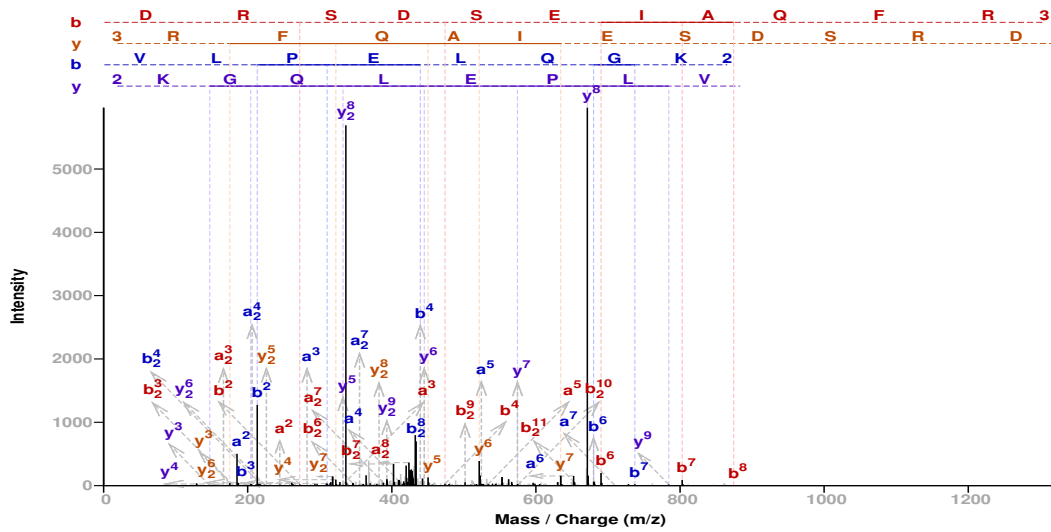

yeast4\_Scan\_Number\_1796 Precursor m/z: 434.219 cosine: 0.908  $\alpha$ : 0.125

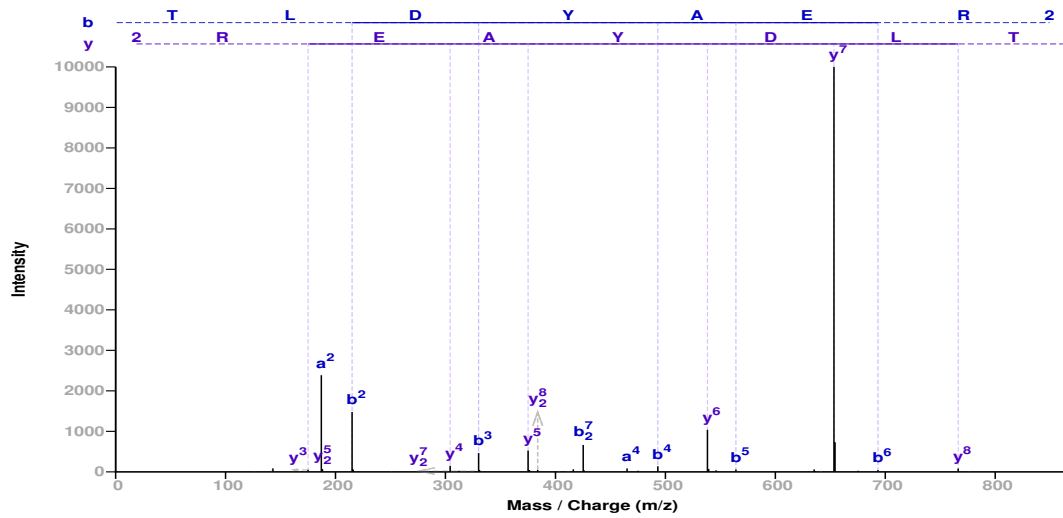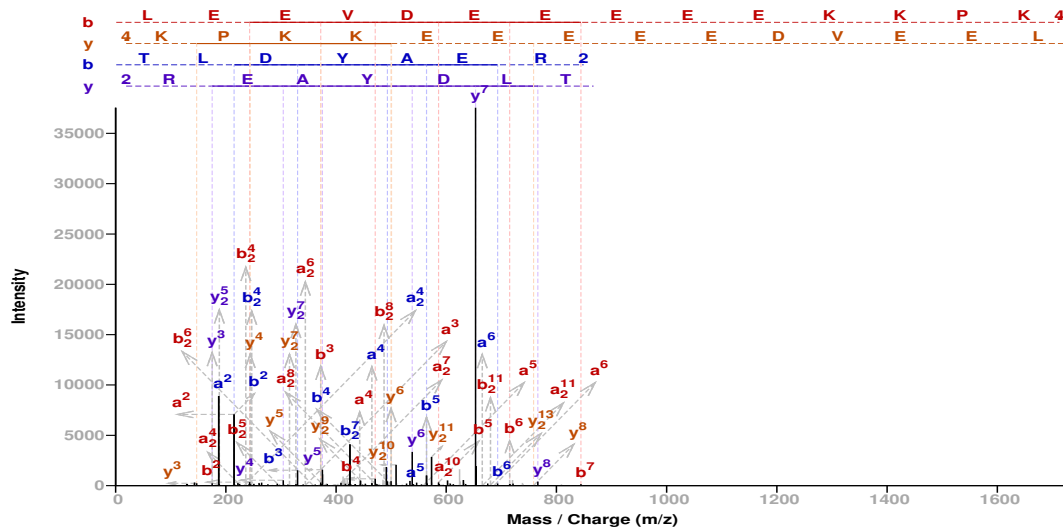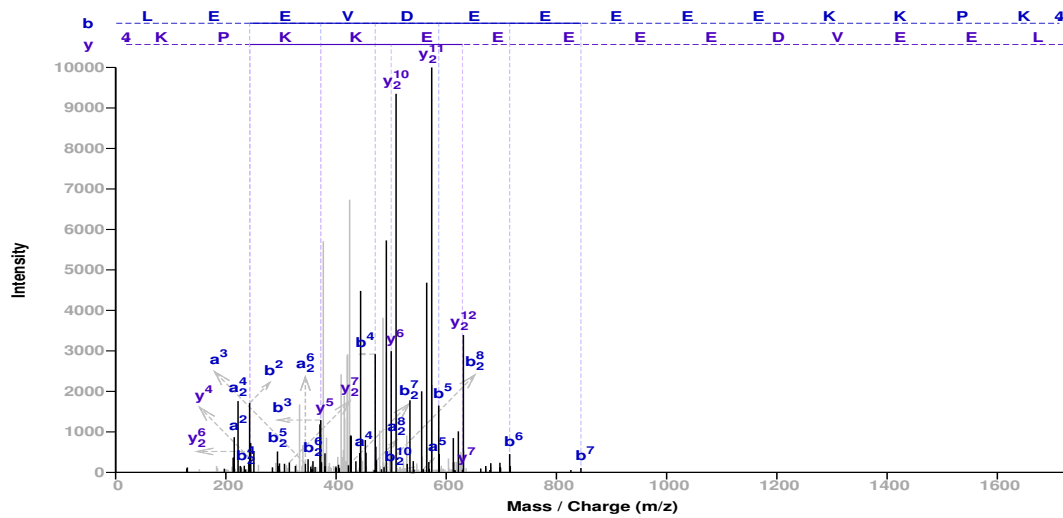

yeast4\_Scan\_Number\_3690 Precursor m/z: 479.259 cosine: 0.858  $\alpha$ : 0.123

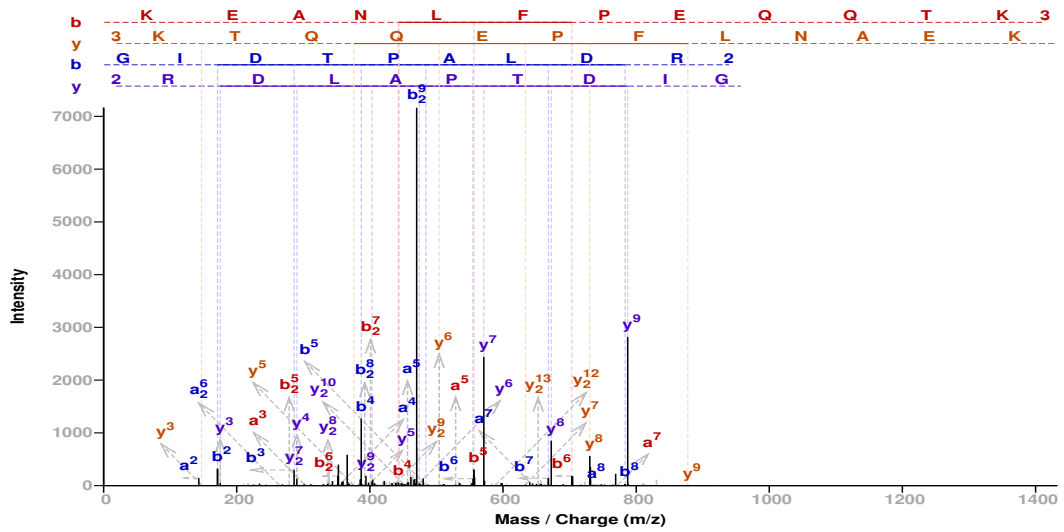

yeast4\_Scan\_Number\_3986 Precursor m/z: 412.880 cosine: 0.932  $\alpha$ : 0.100

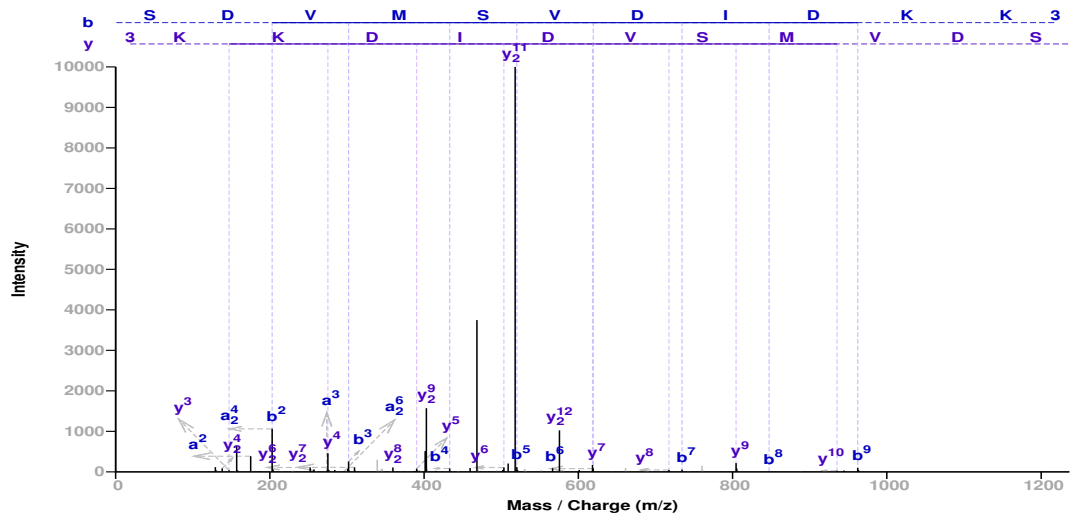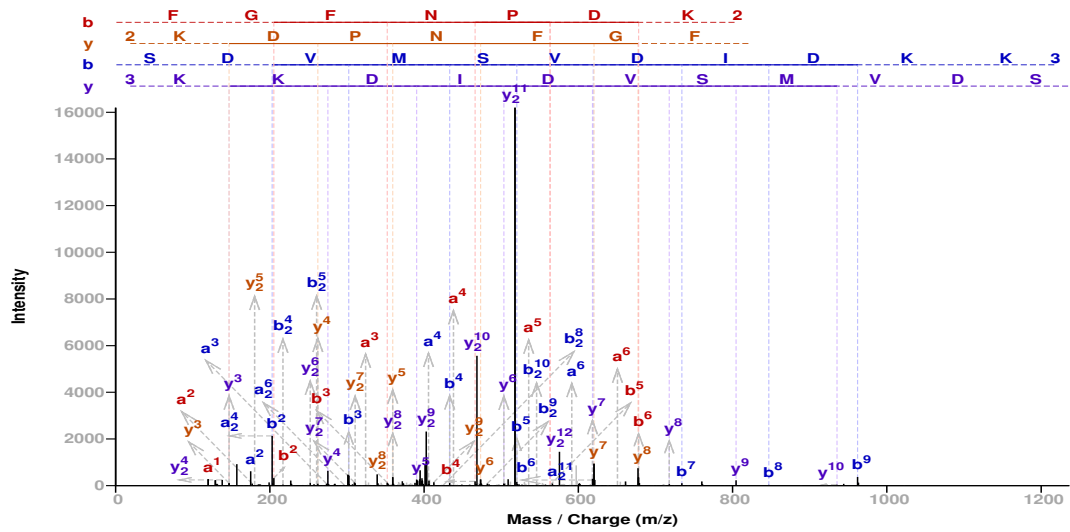

yeast5.Scan\_Number\_5791 Precursor m/z: 558.797 cosine: 0.751  $\alpha$ : 0.983

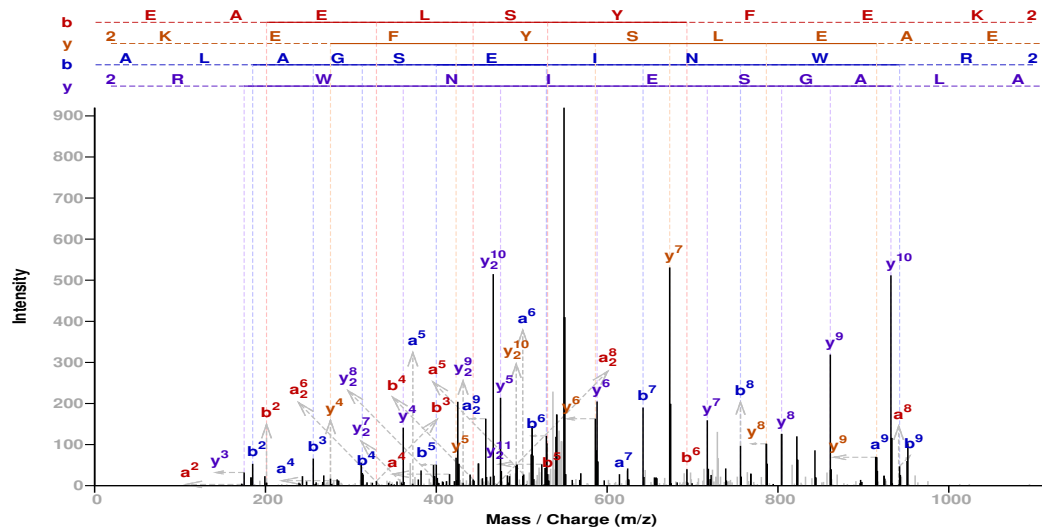



yeast5\_Scan\_Number\_3290 Precursor m/z: 581.266 cosine: 0.823  $\alpha$ : 0.944

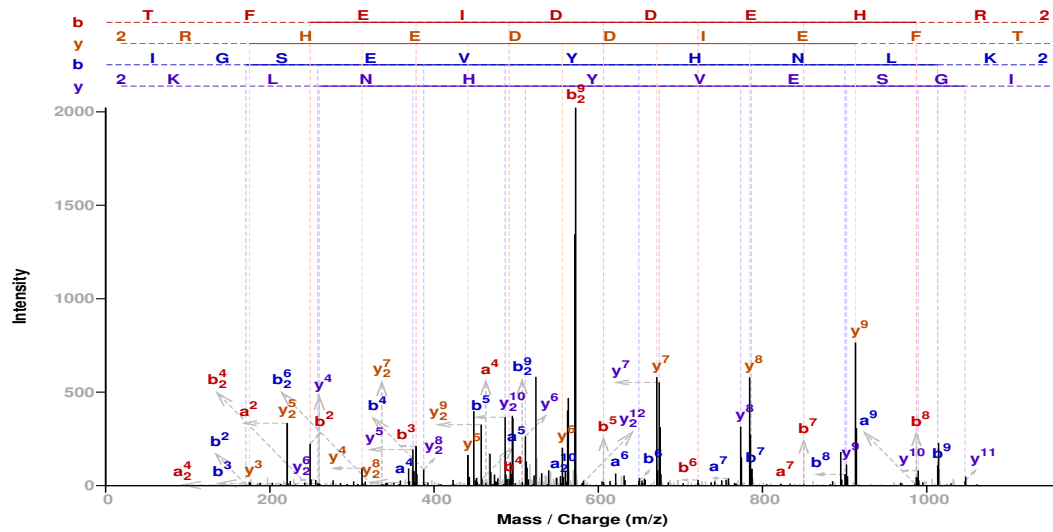

yeast5\_Scan\_Number\_3358 Precursor m/z: 557.316 cosine: 0.744  $\alpha$ : 0.915

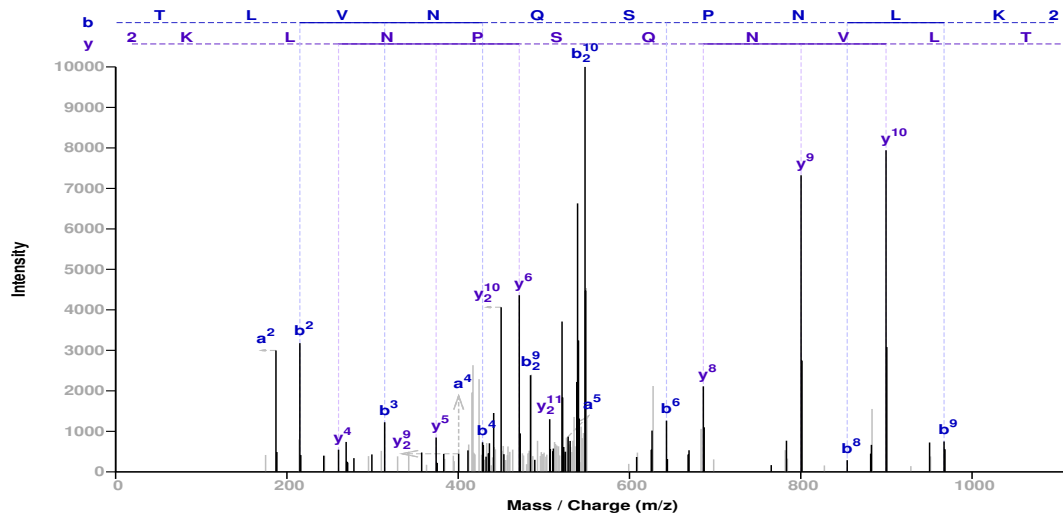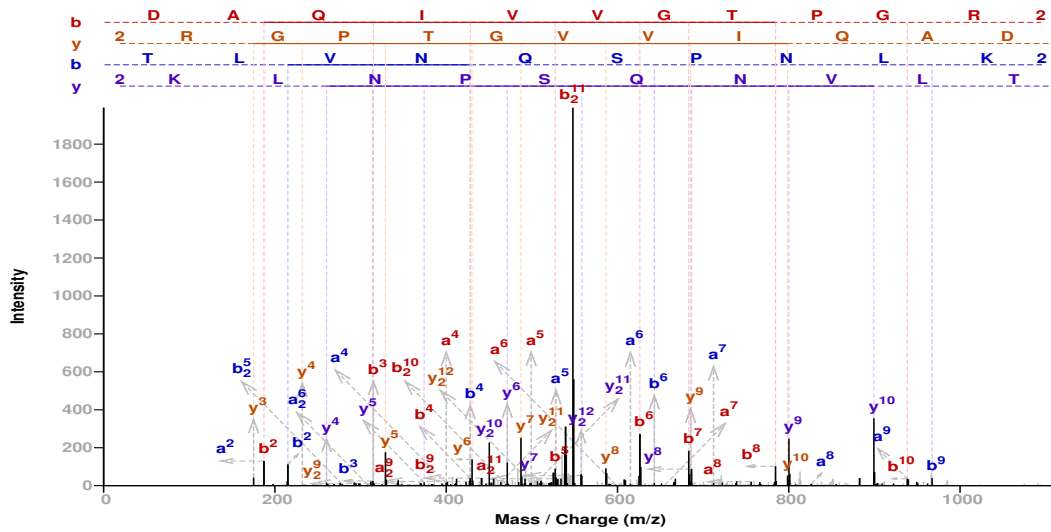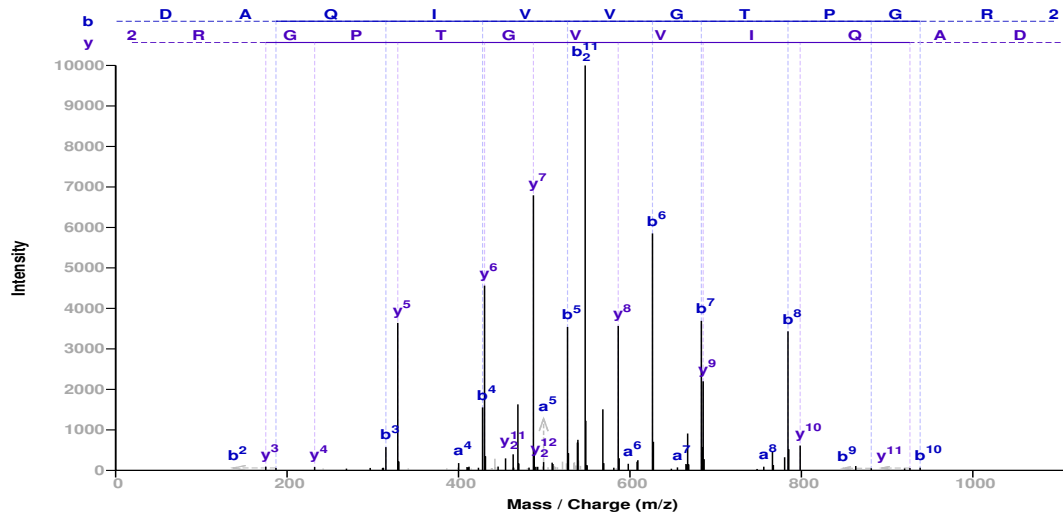



yeast5.Scan\_Number\_4818 Precursor m/z: 478.291 cosine: 0.795  $\alpha$ : 0.892

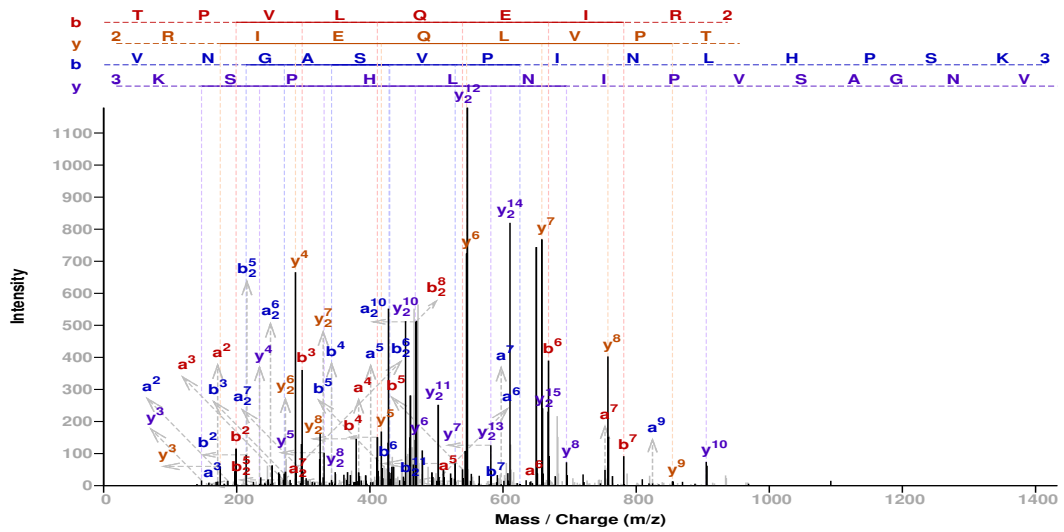

yeast5.Scan\_Number\_2909 Precursor m/z: 501.799 cosine: 0.767  $\alpha$ : 0.857

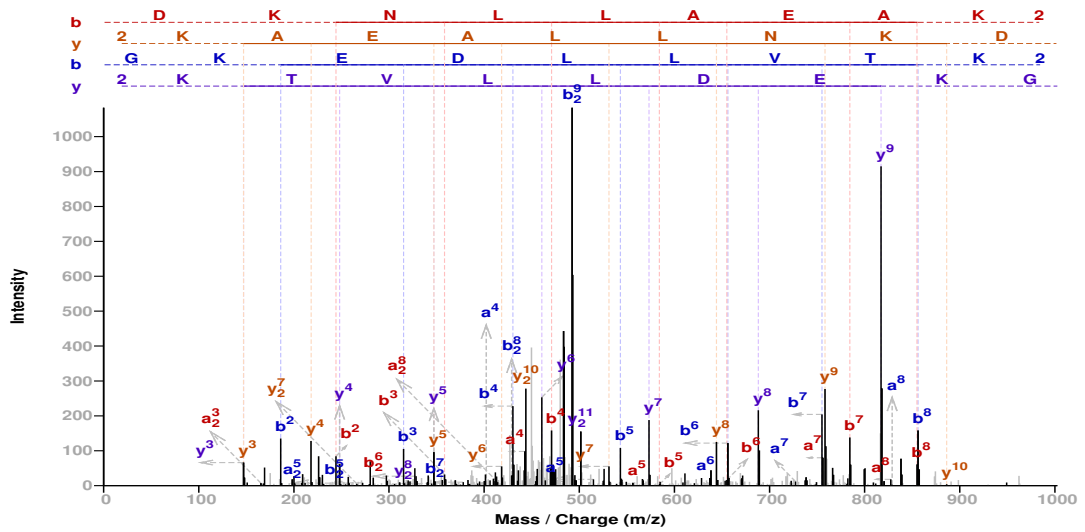

yeast5\_Scan\_Number\_9848 Precursor m/z: 789.912 cosine: 0.780  $\alpha$ : 0.853

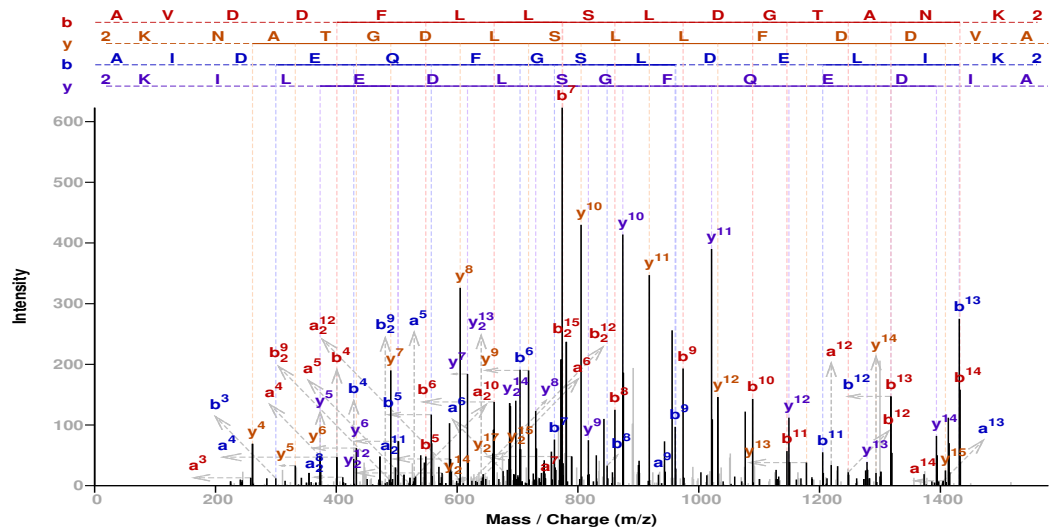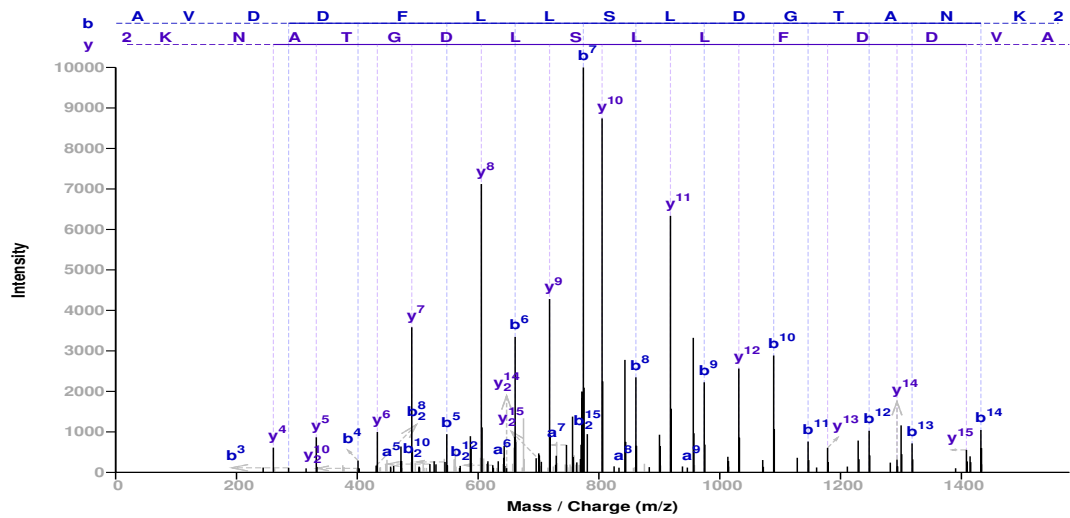

yeast5\_Scan\_Number\_2834 Precursor m/z: 480.759 cosine: 0.758  $\alpha$ : 0.837

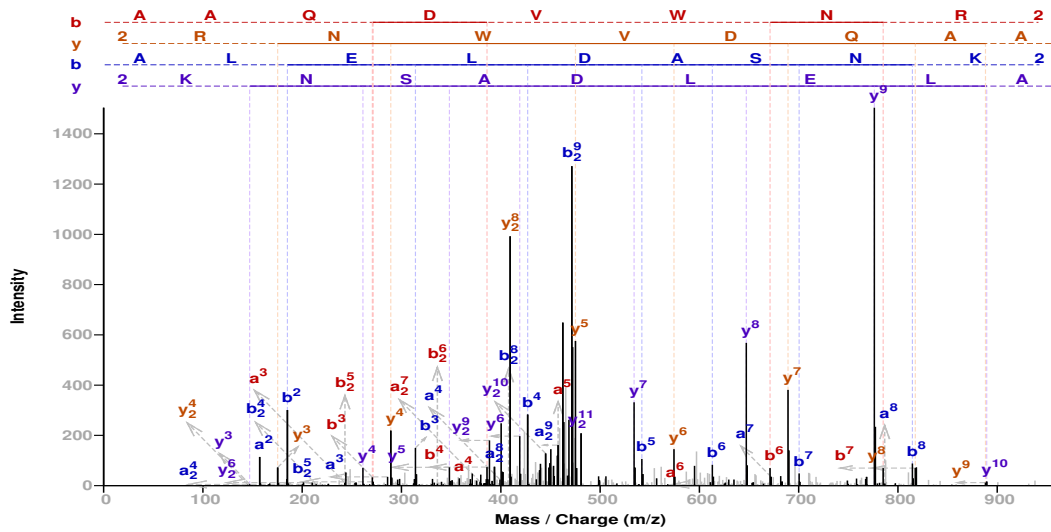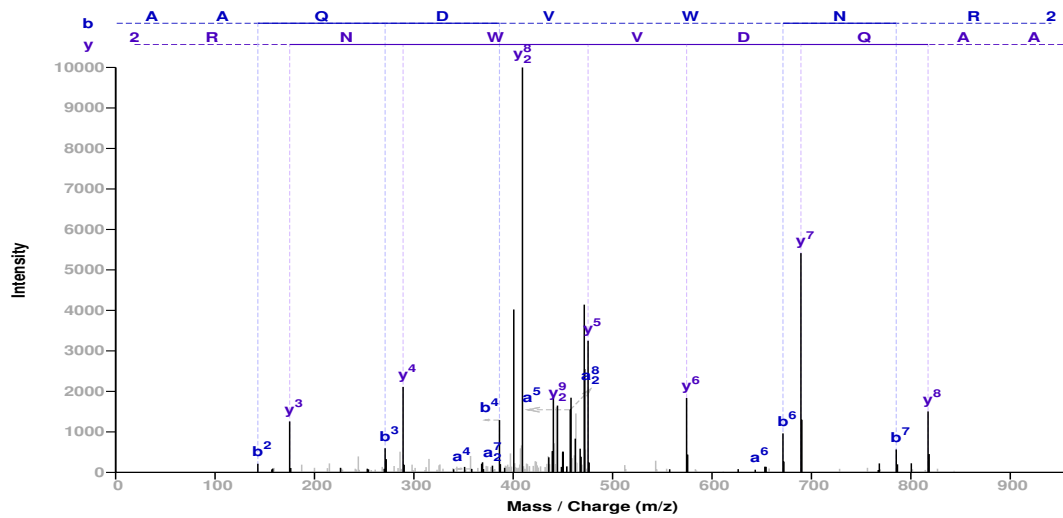

yeast5\_Scan\_Number\_5664 Precursor m/z: 602.320 cosine: 0.884  $\alpha$ : 0.831

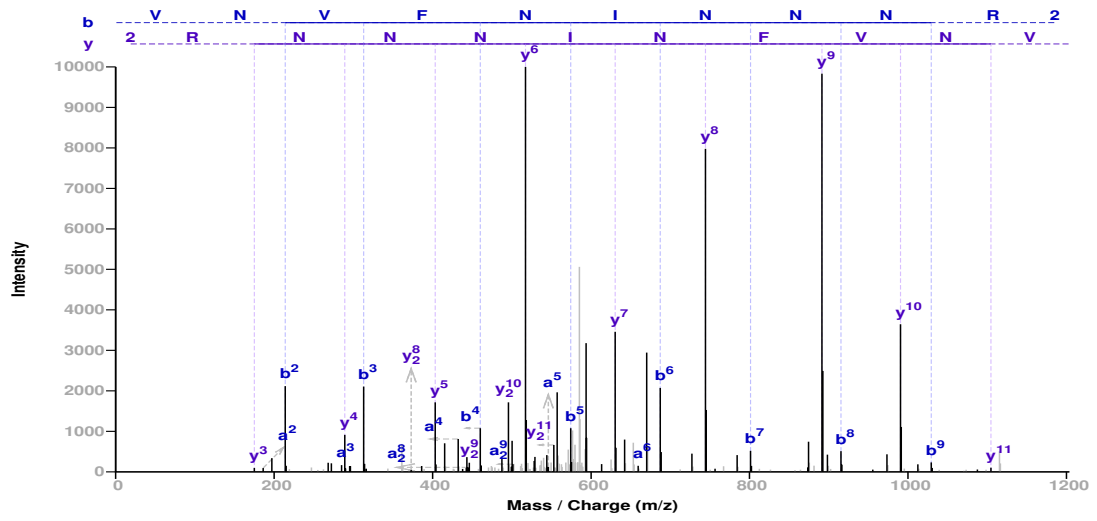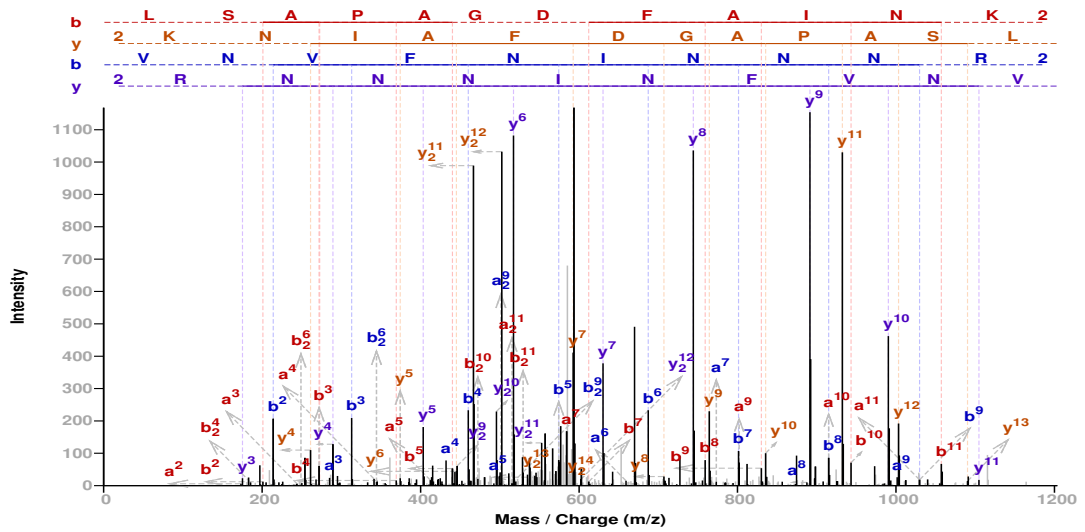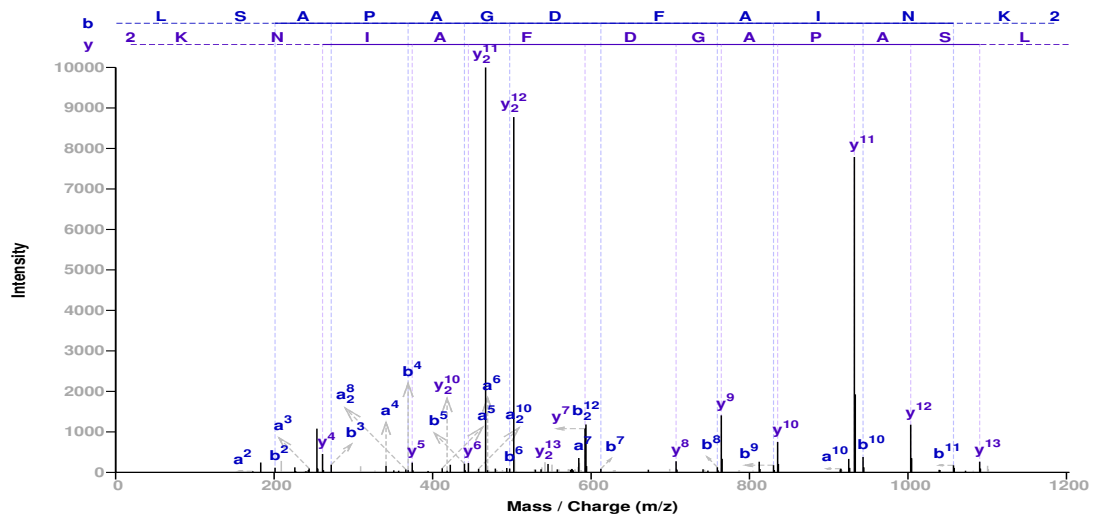

yeast5\_Scan\_Number\_3843 Precursor m/z: 379.232 cosine: 0.770  $\alpha$ : 0.830

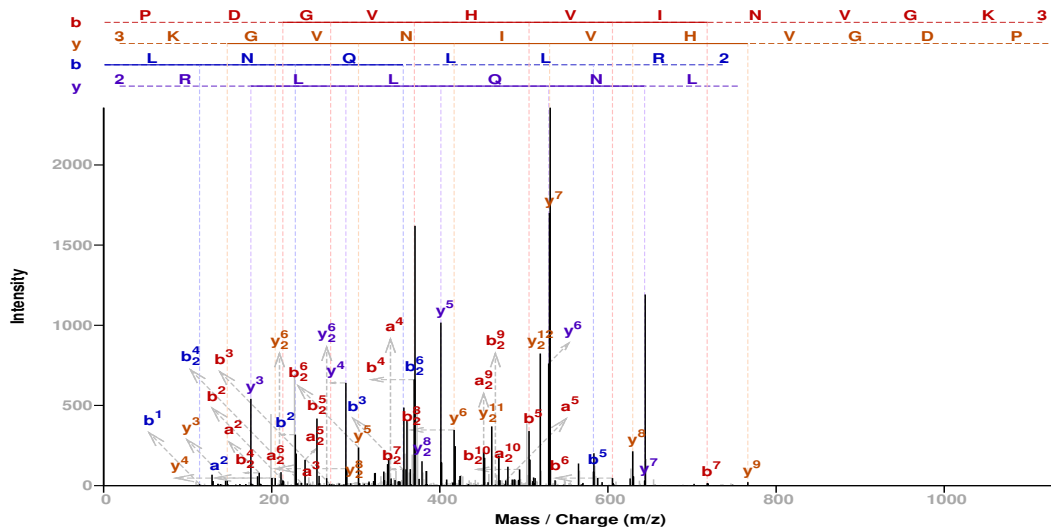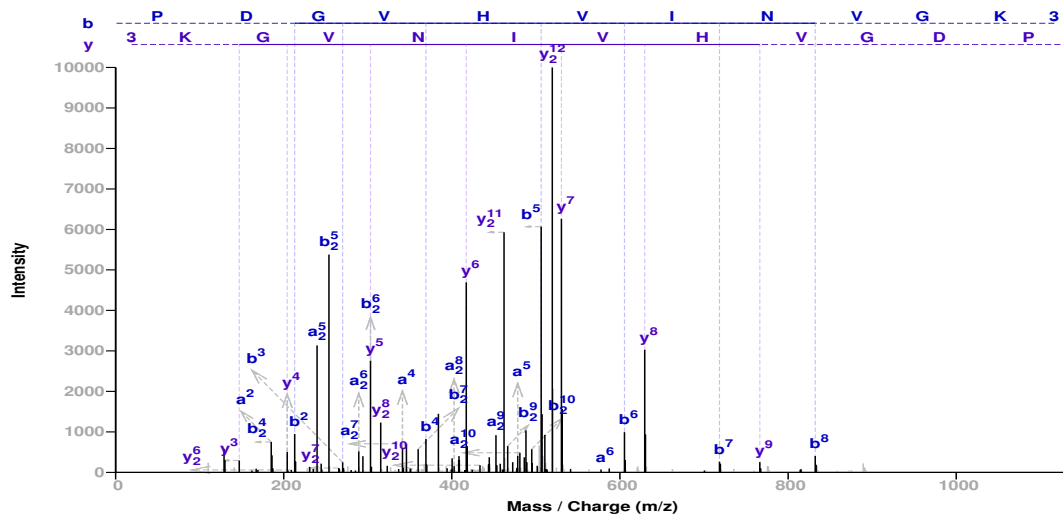

yeast5\_Scan\_Number\_693 Precursor m/z: 402.215 cosine: 0.800  $\alpha$ : 0.823

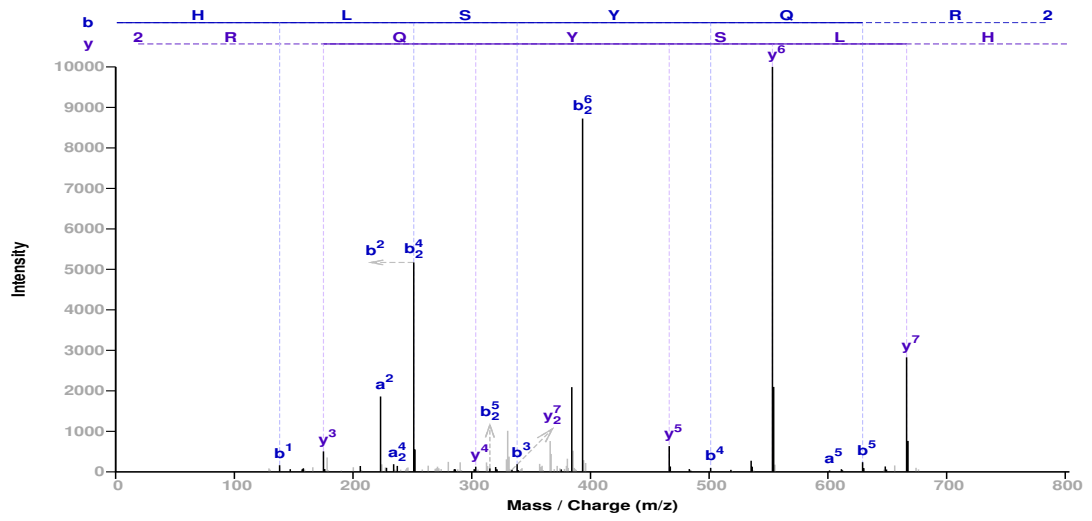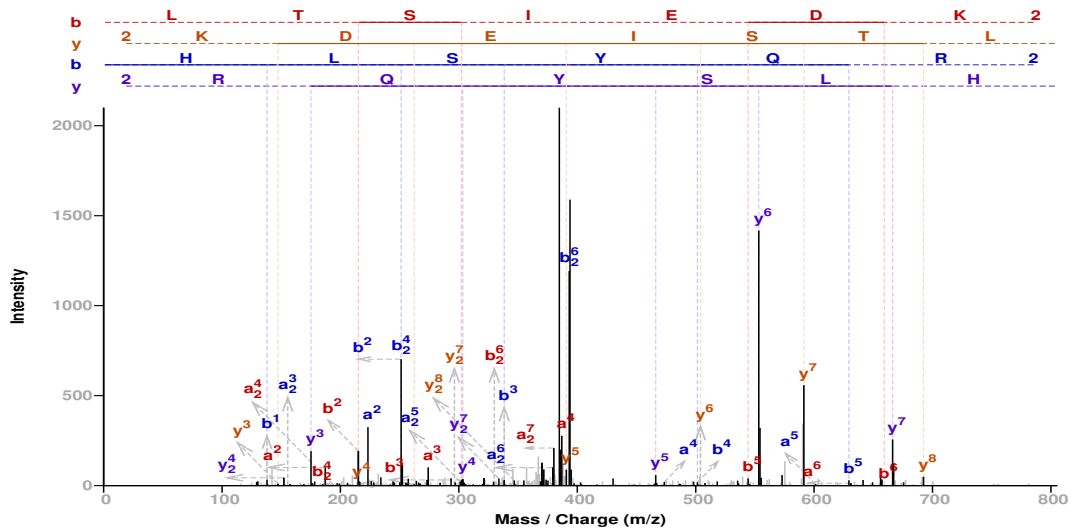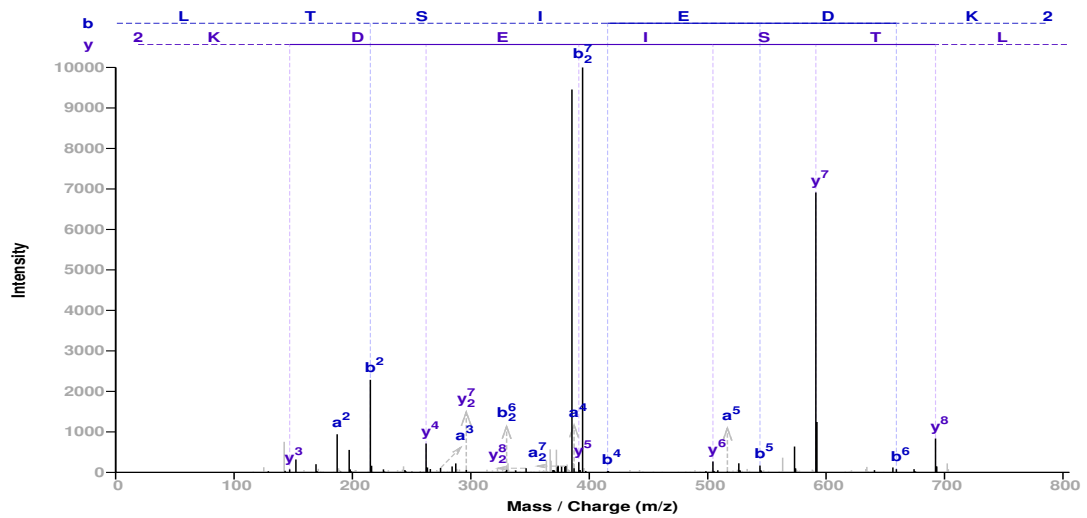

yeast5.Scan\_Number\_2710 Precursor m/z: 415.743 cosine: 0.790  $\alpha$ : 0.819

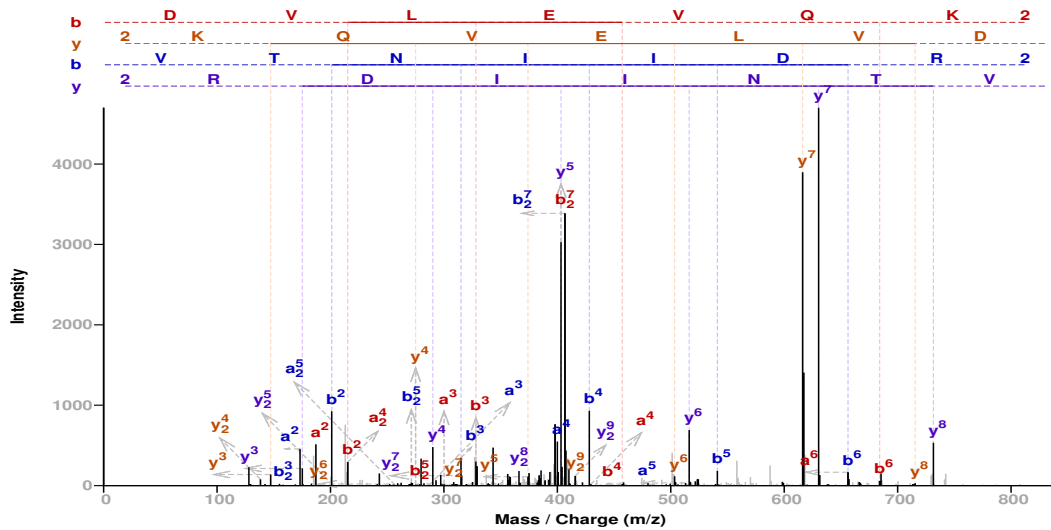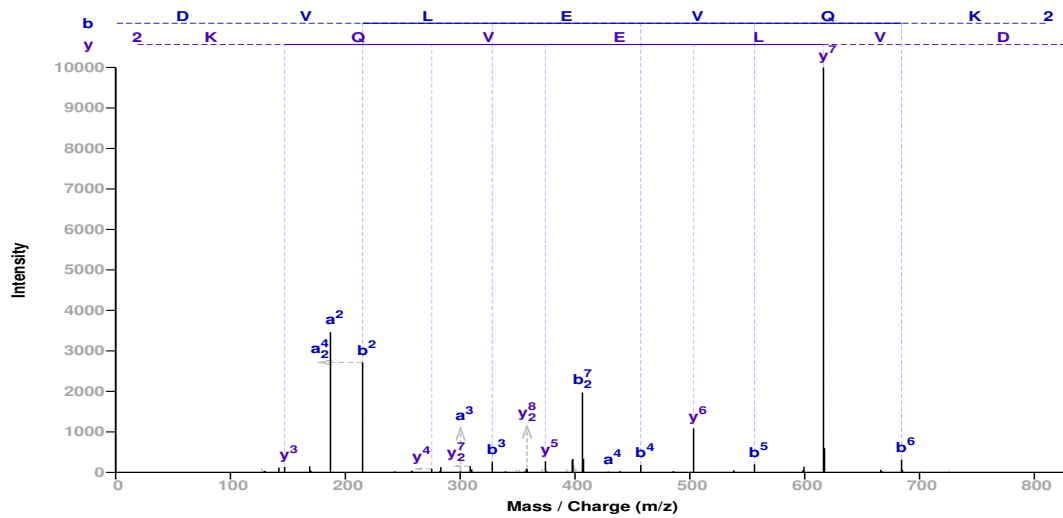



yeast5\_Scan\_Number\_4216 Precursor m/z: 444.763 cosine: 0.885  $\alpha$ : 0.798

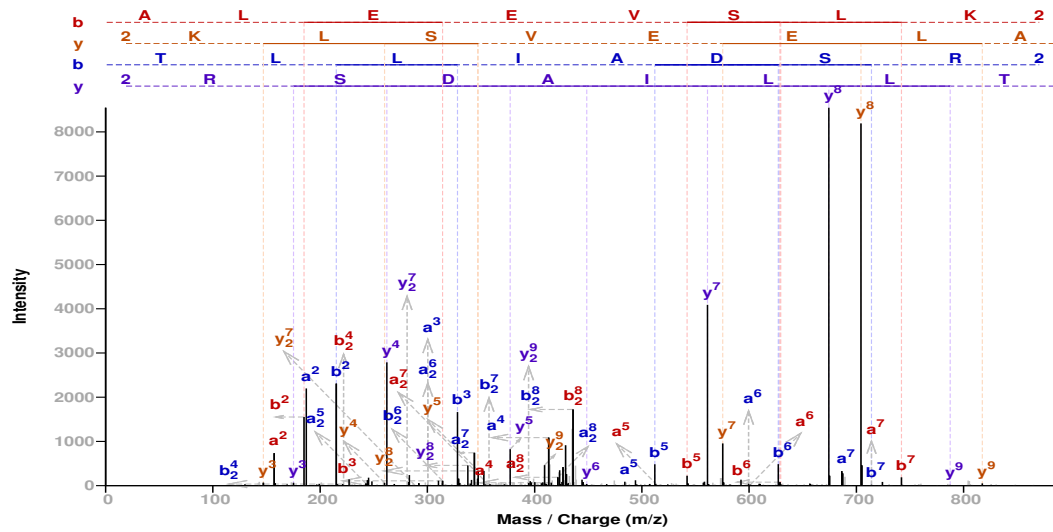

yeast5\_Scan\_Number\_1893 Precursor m/z: 393.725 cosine: 0.848  $\alpha$ : 0.792

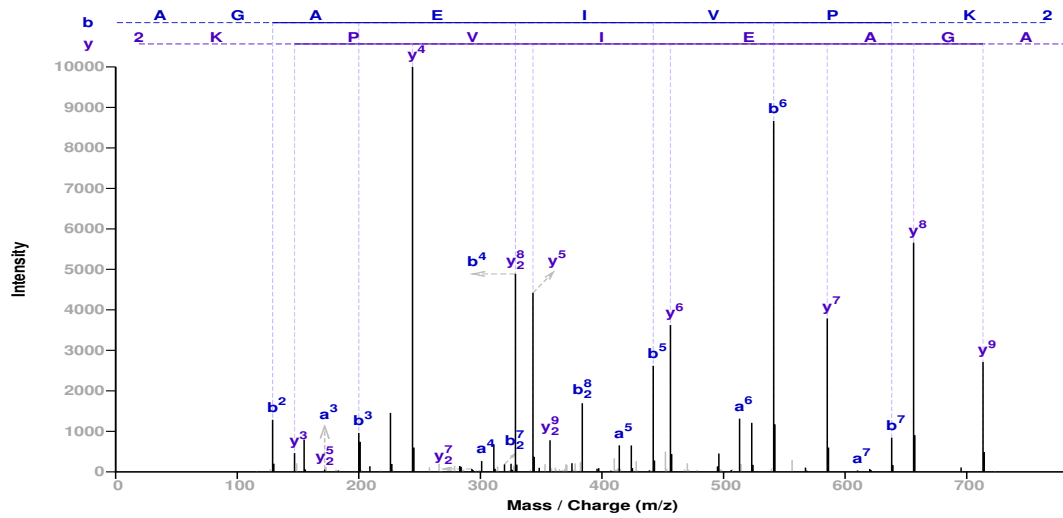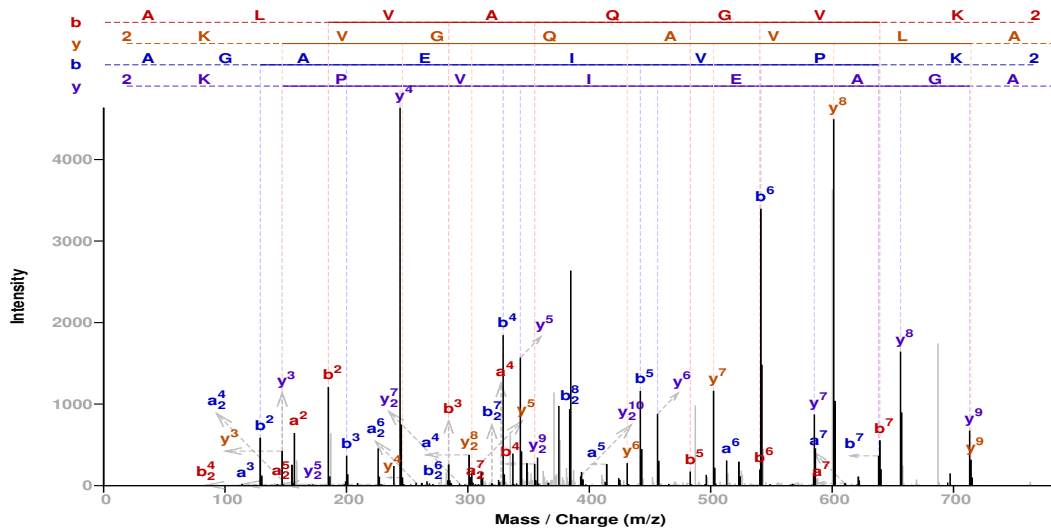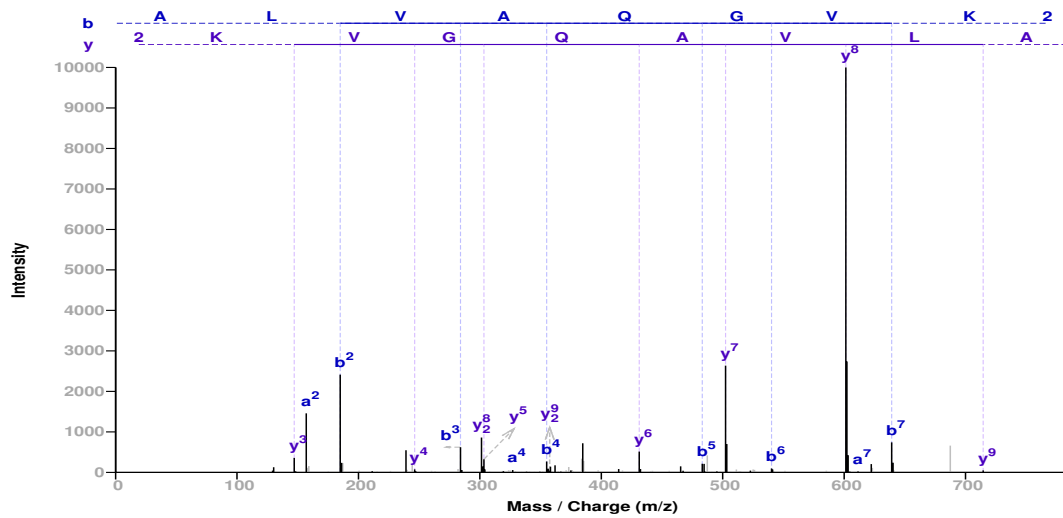

yeast5.Scan\_Number.1578 Precursor m/z: 516.755 cosine: 0.730  $\alpha$ : 0.791

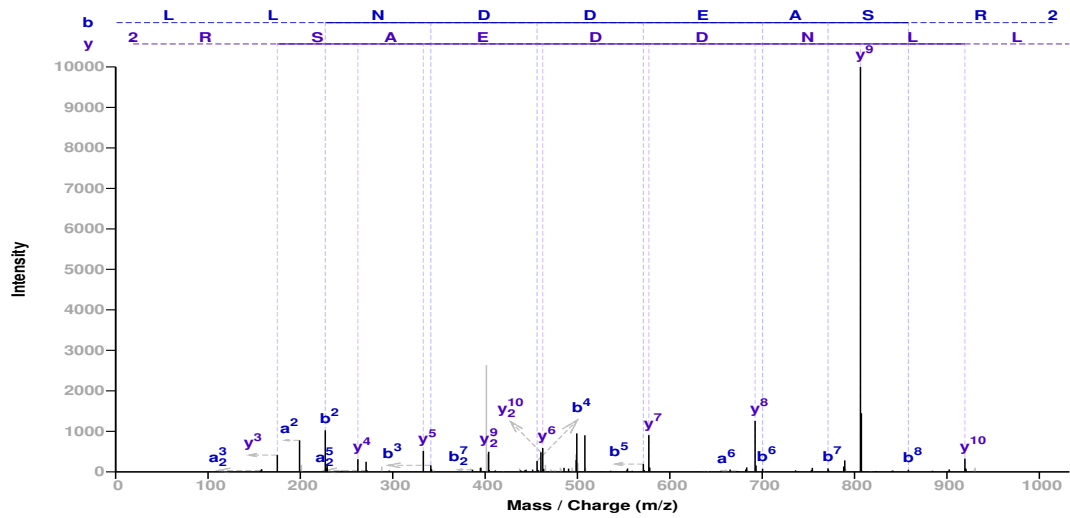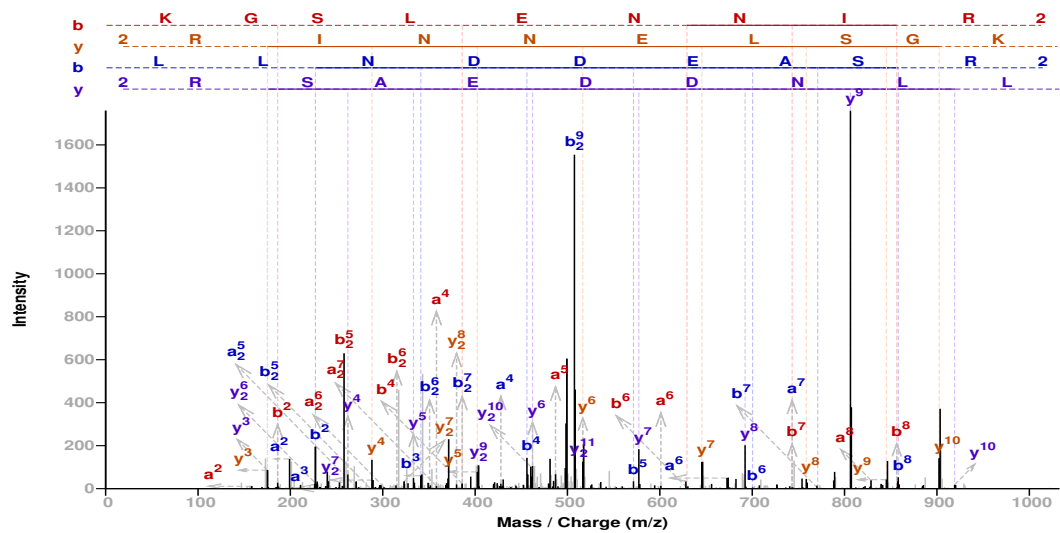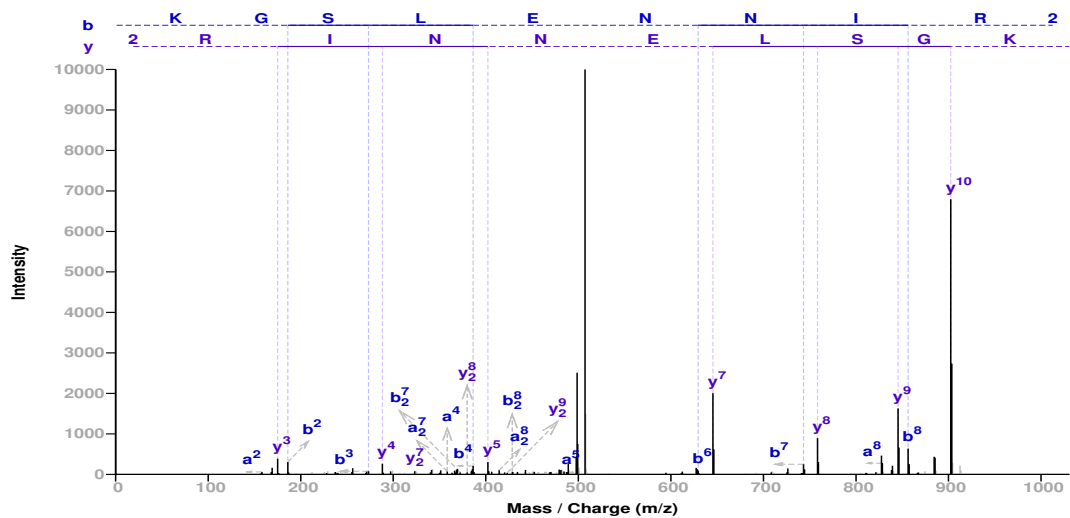

yeast5.Scan\_Number.2182 Precursor m/z: 450.764 cosine: 0.751  $\alpha$ : 0.784

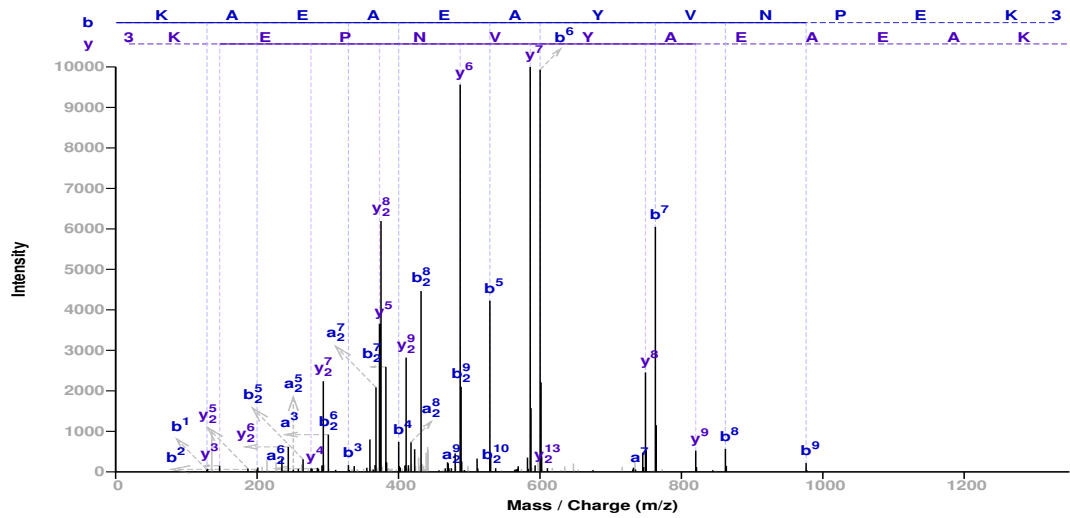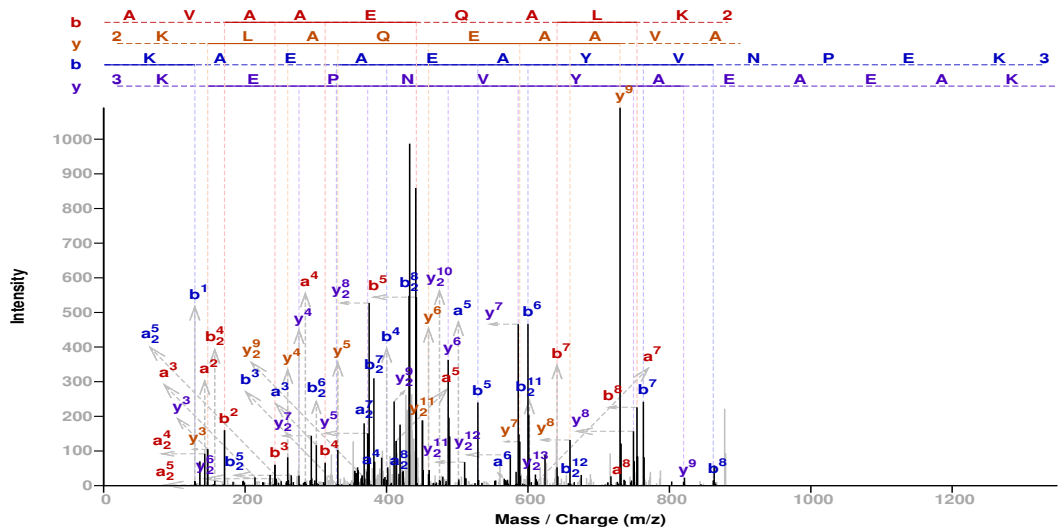

yeast5\_Scan\_Number\_4010 Precursor m/z: 480.766 cosine: 0.827  $\alpha$ : 0.775

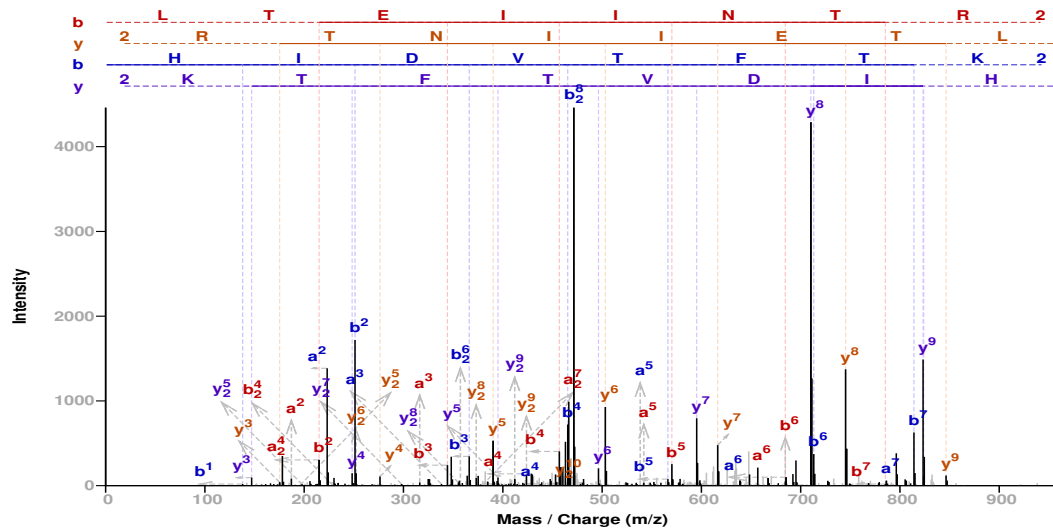

yeast5\_Scan\_Number\_7850 Precursor m/z: 559.799 cosine: 0.765  $\alpha$ : 0.762

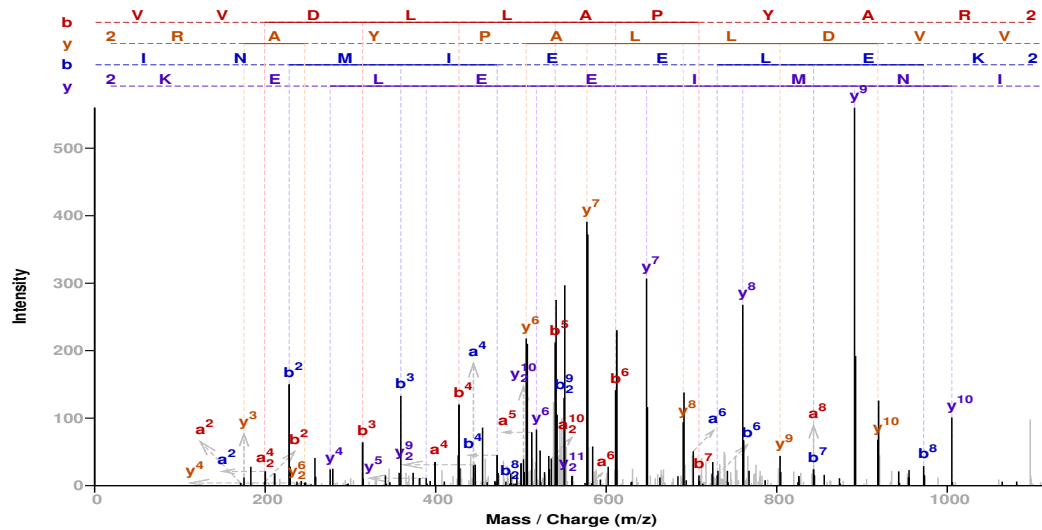

yeast5.Scan\_Number\_2618 Precursor m/z: 408.754 cosine: 0.834  $\alpha$ : 0.758

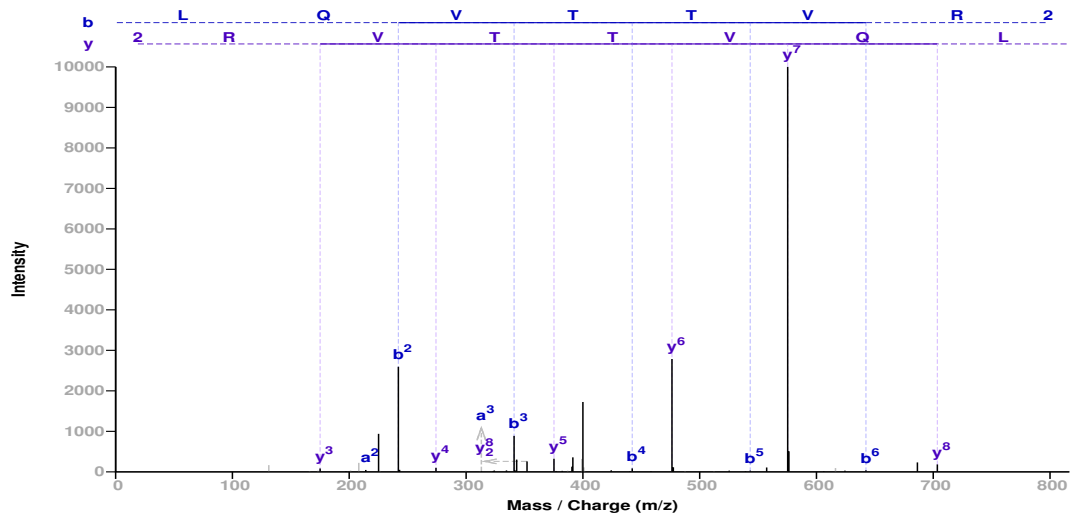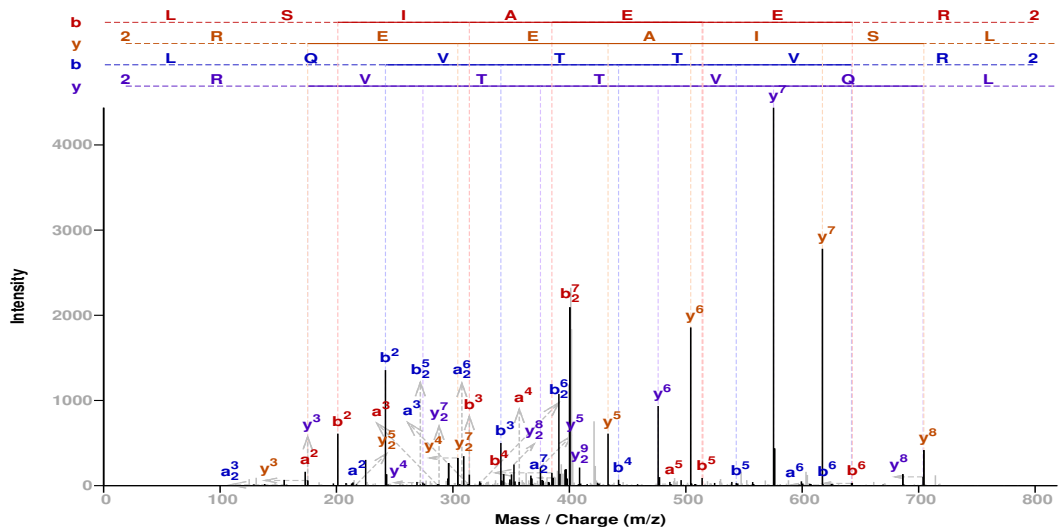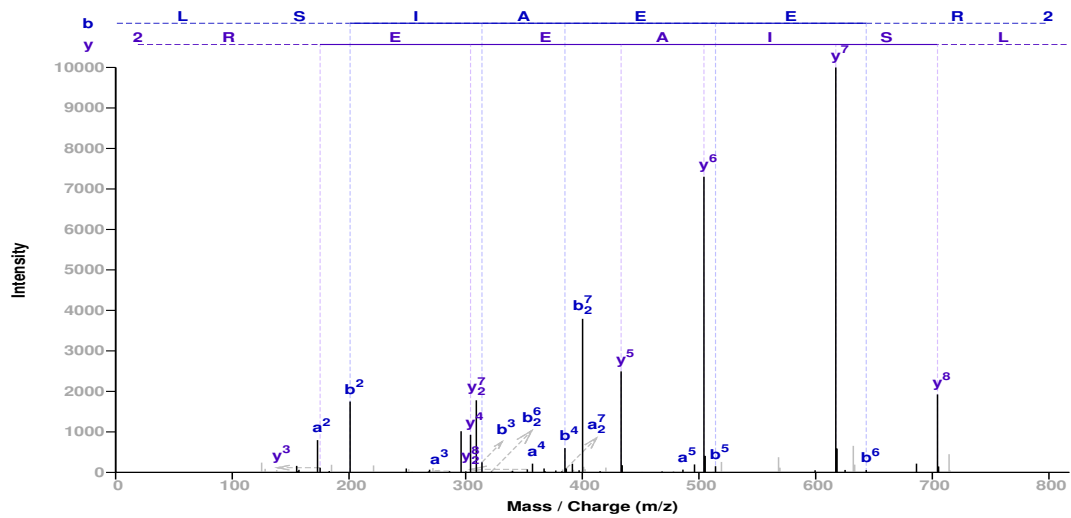

yeast5\_Scan\_Number\_7773 Precursor m/z: 599.318 cosine: 0.773  $\alpha$ : 0.738

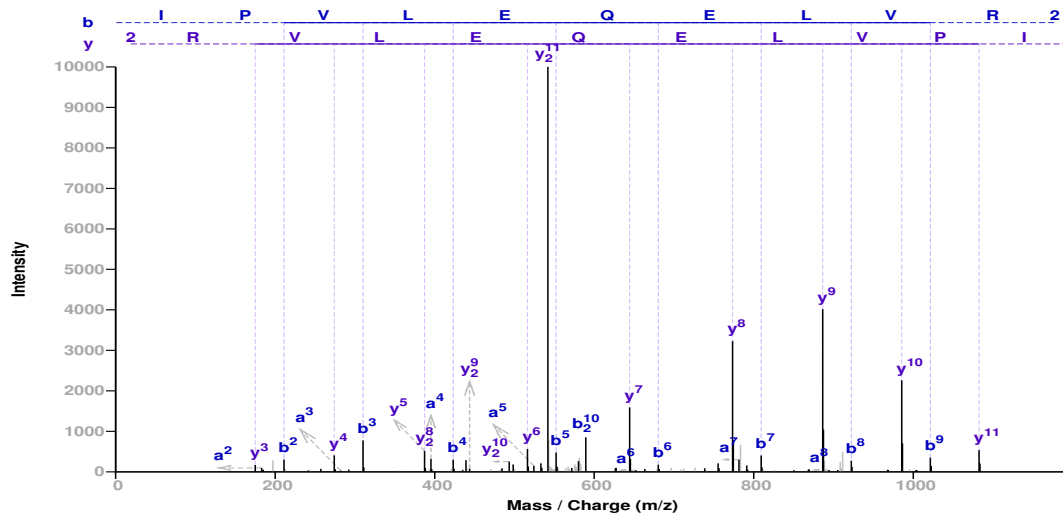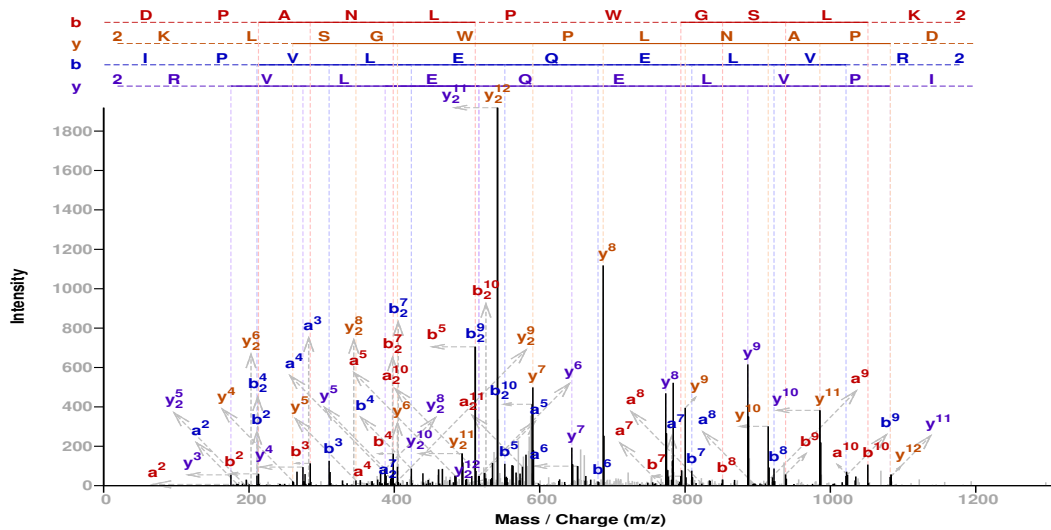



yeast5\_Scan\_Number\_4935 Precursor m/z: 596.310 cosine: 0.851  $\alpha$ : 0.736

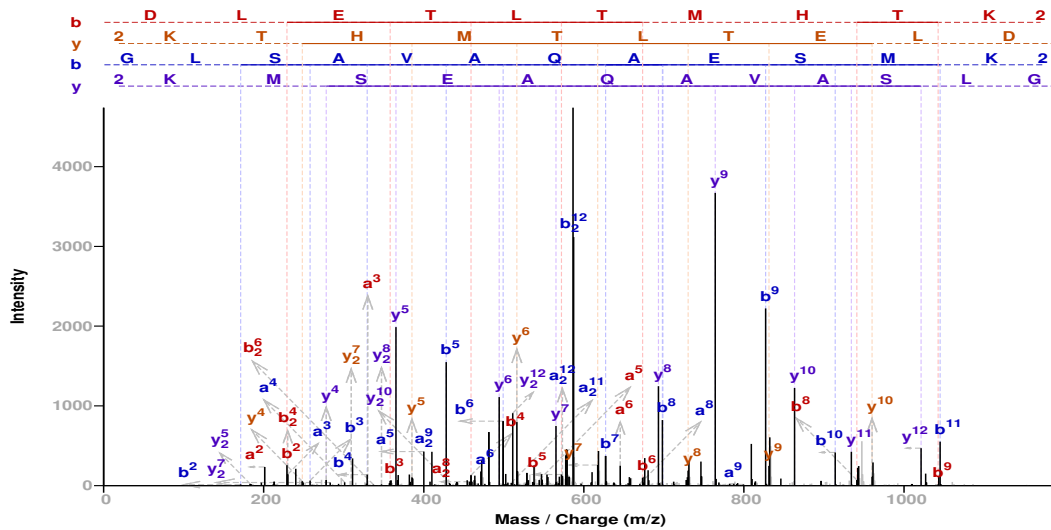

yeast5\_Scan\_Number\_3994 Precursor m/z: 618.817 cosine: 0.762  $\alpha$ : 0.726

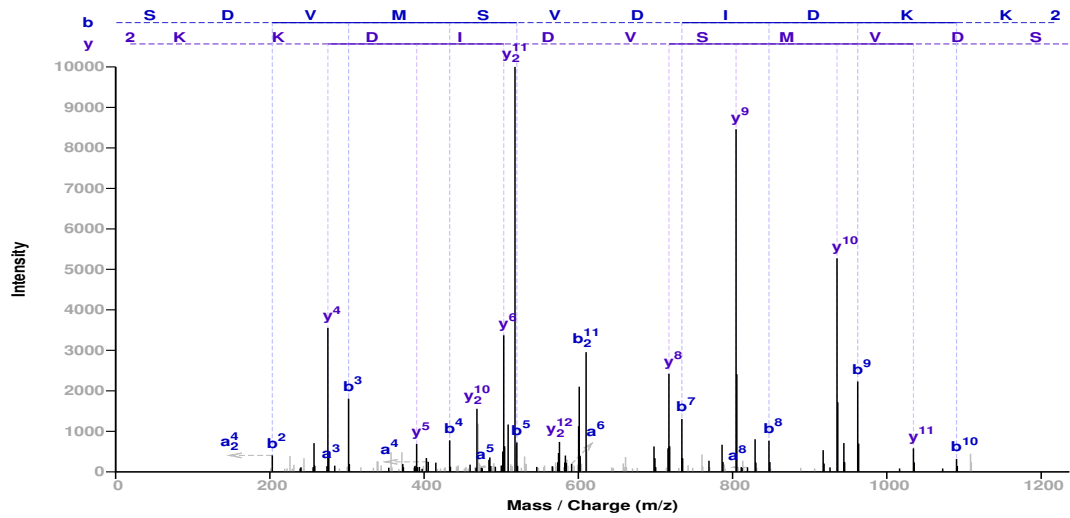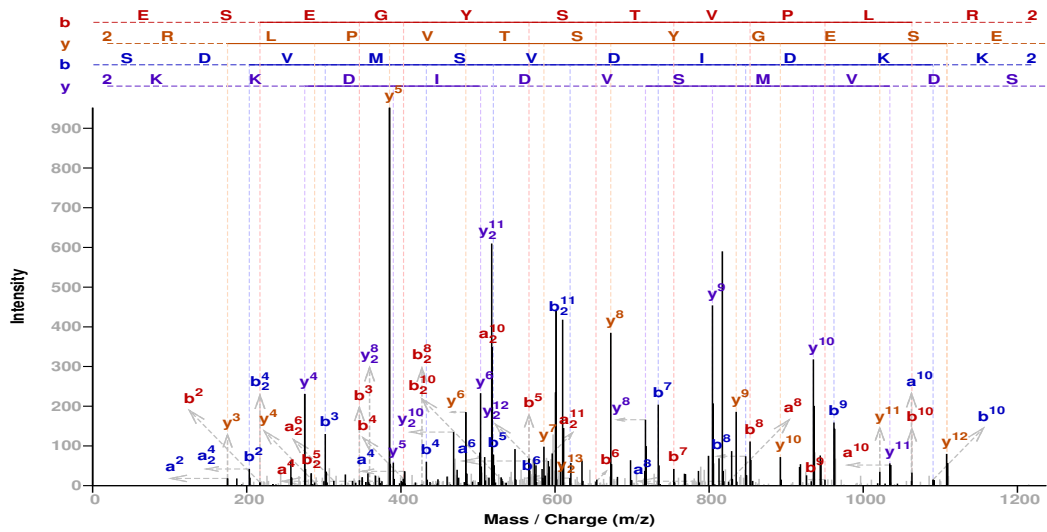

yeast5\_Scan\_Number\_4286 Precursor m/z: 506.291 cosine: 0.738  $\alpha$ : 0.723

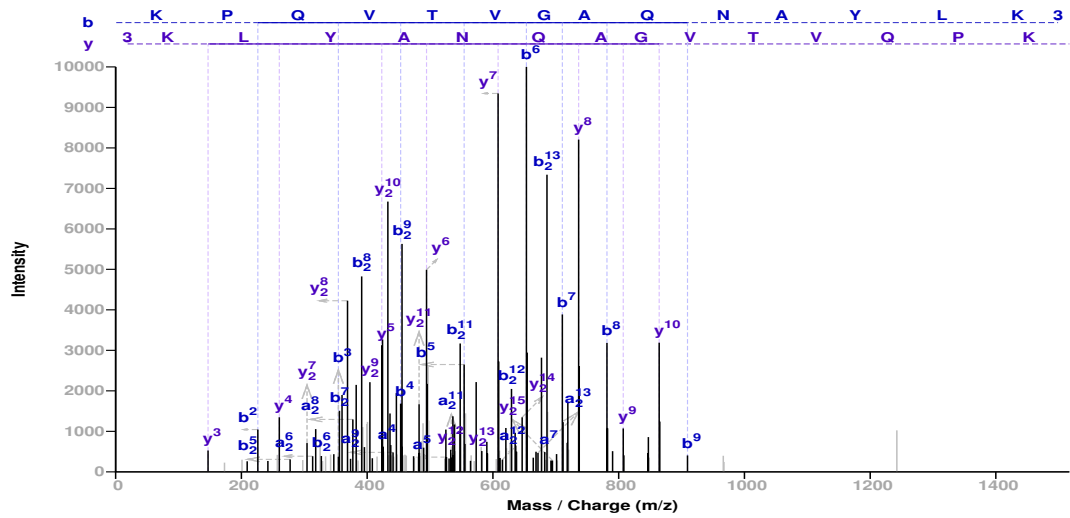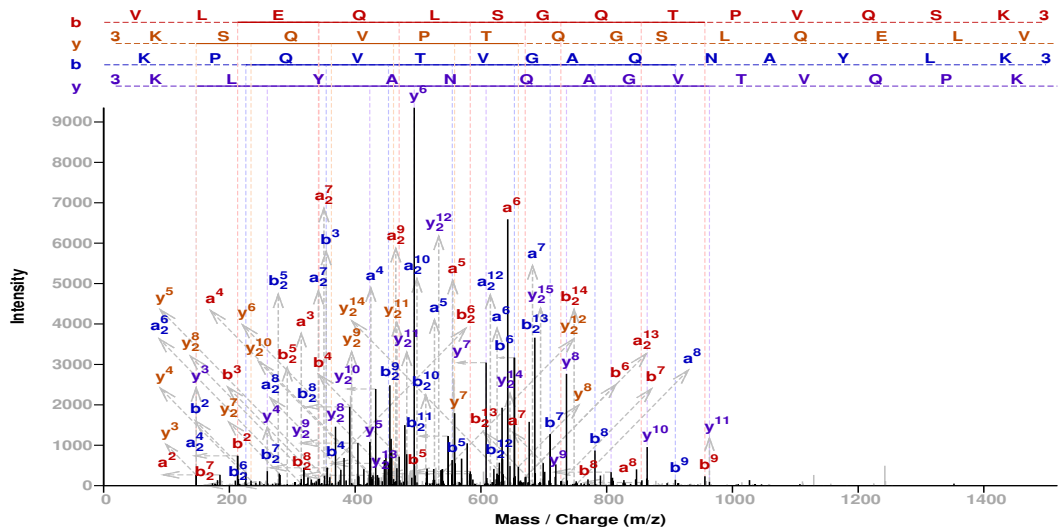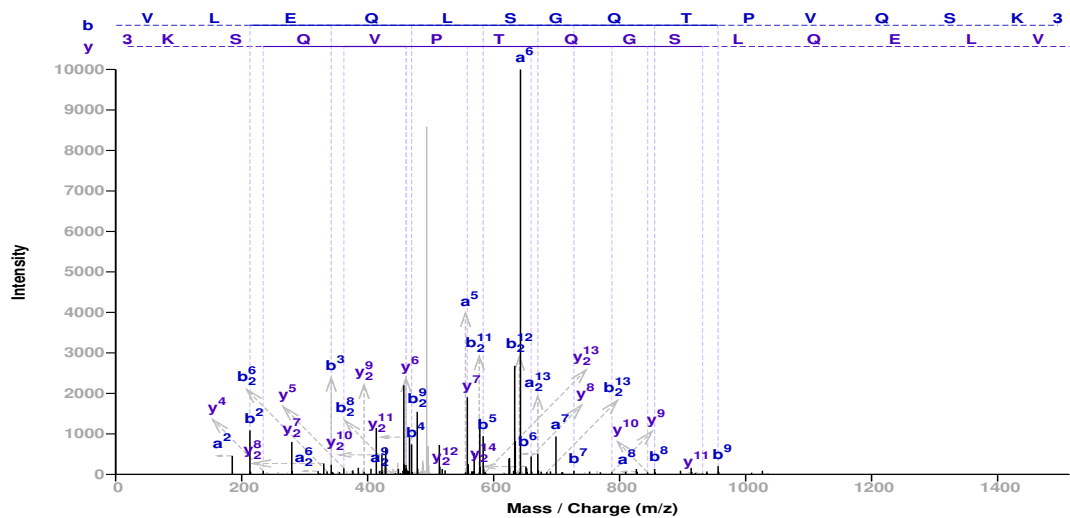

yeast5\_Scan\_Number\_5790 Precursor m/z: 536.290 cosine: 0.792  $\alpha$ : 0.716

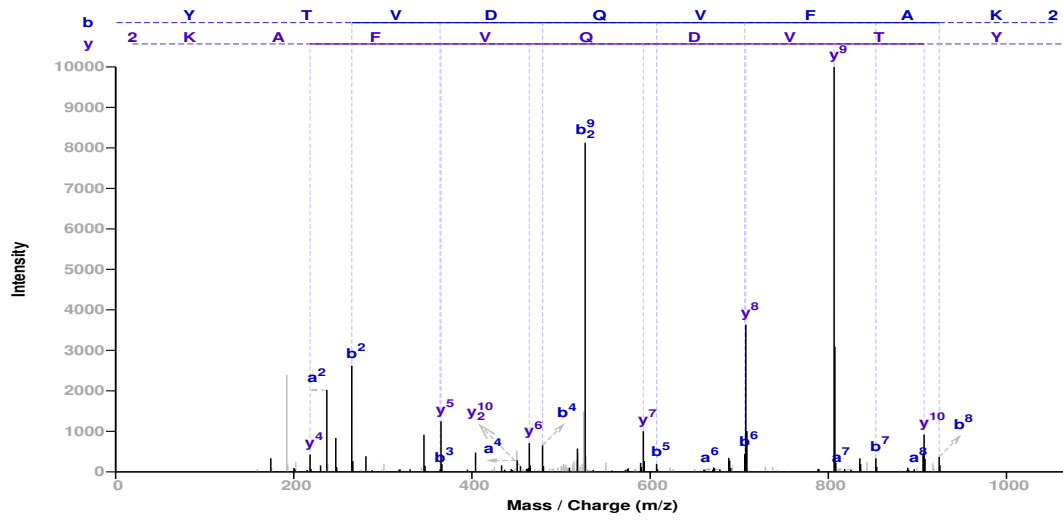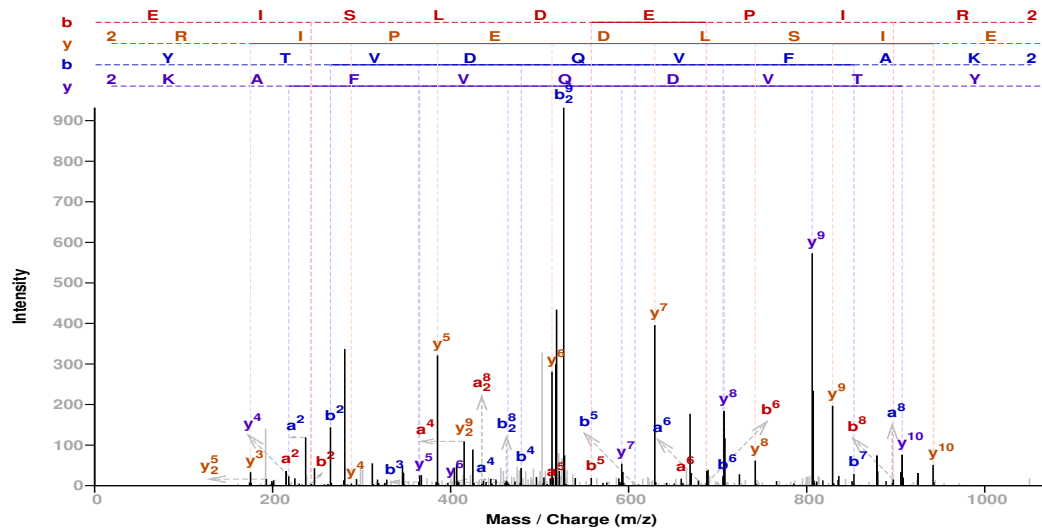

yeast5.Scan\_Number.4603 Precursor m/z: 462.577 cosine: 0.902  $\alpha$ : 0.714

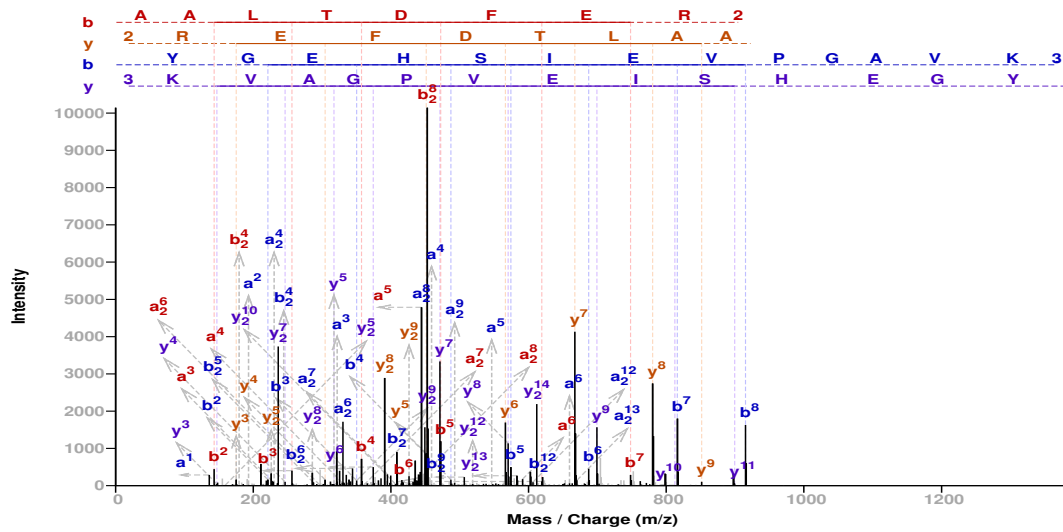

yeast5\_Scan\_Number\_2965 Precursor m/z: 409.729 cosine: 0.737  $\alpha$ : 0.712

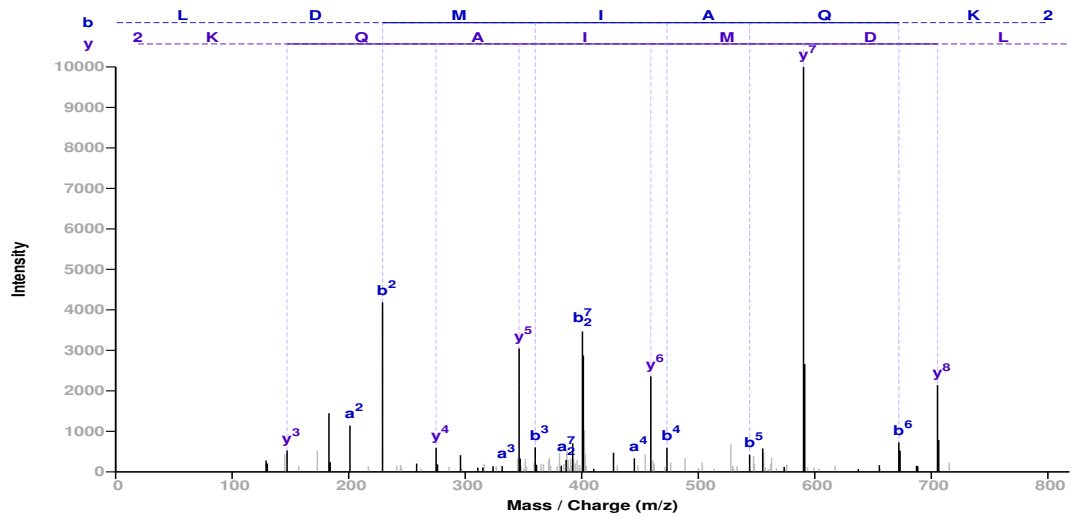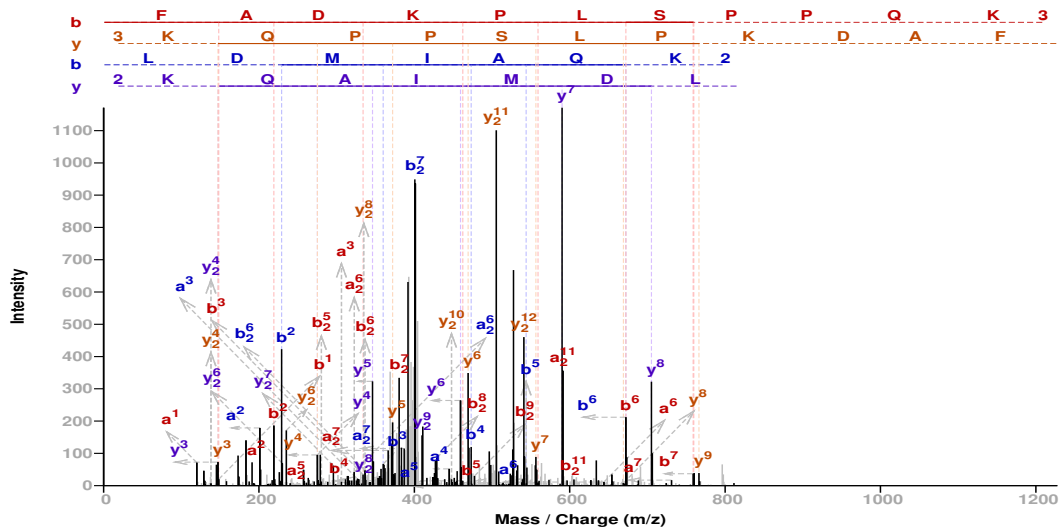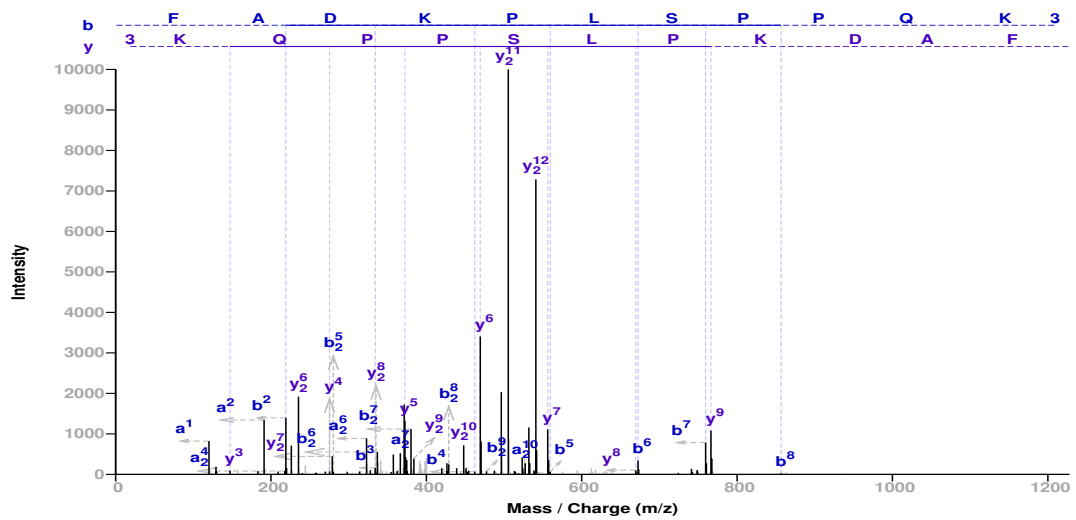

yeast5.Scan\_Number.1875 Precursor m/z: 502.758 cosine: 0.800  $\alpha$ : 0.711

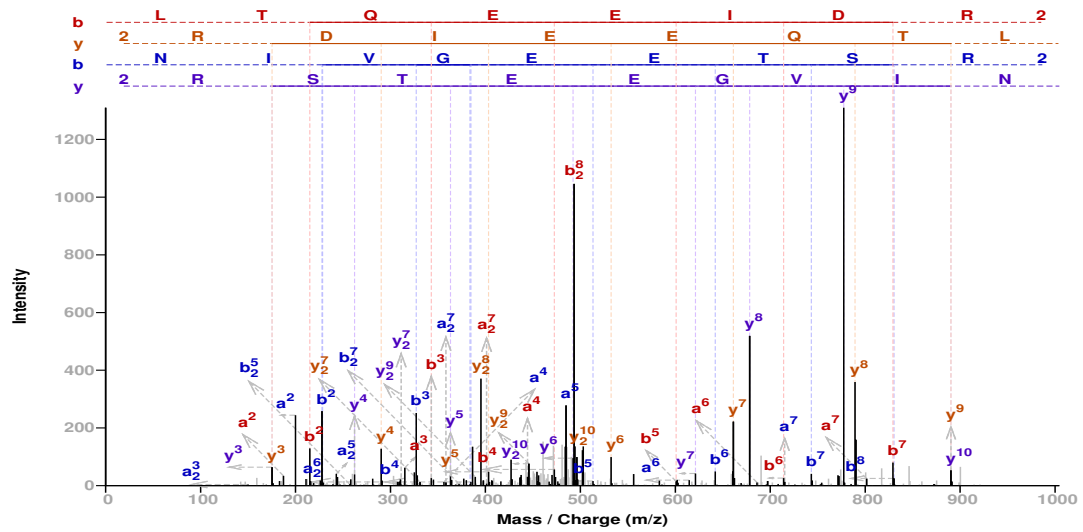

yeast5\_Scan\_Number\_1095 Precursor m/z: 516.280 cosine: 0.751  $\alpha$ : 0.668

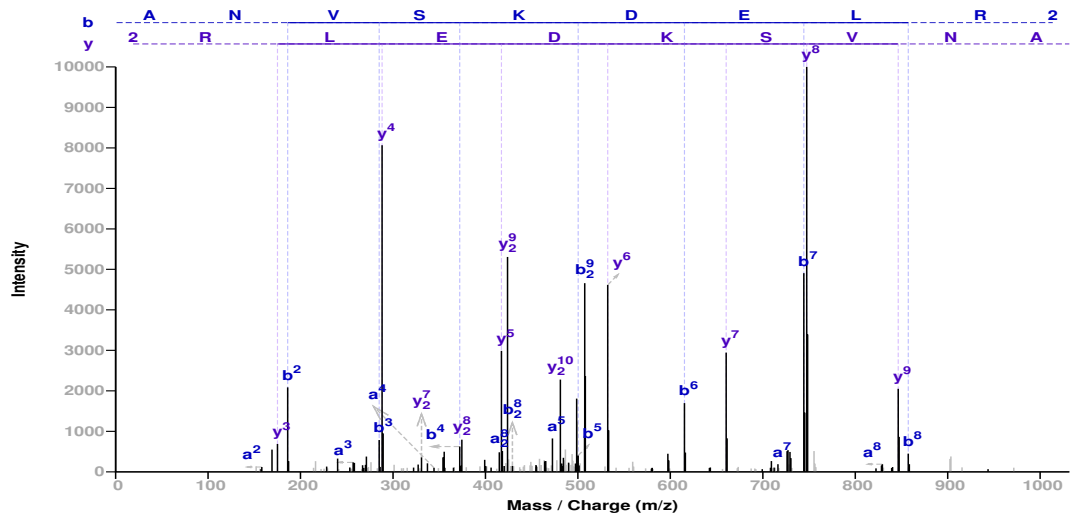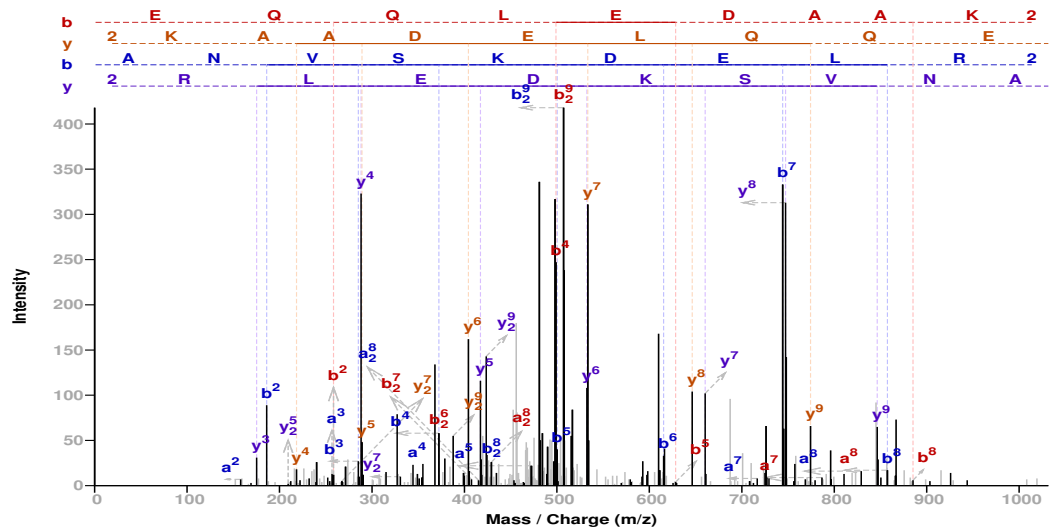



yeast5.Scan\_Number.2668 Precursor m/z: 498.745 cosine: 0.845  $\alpha$ : 0.662

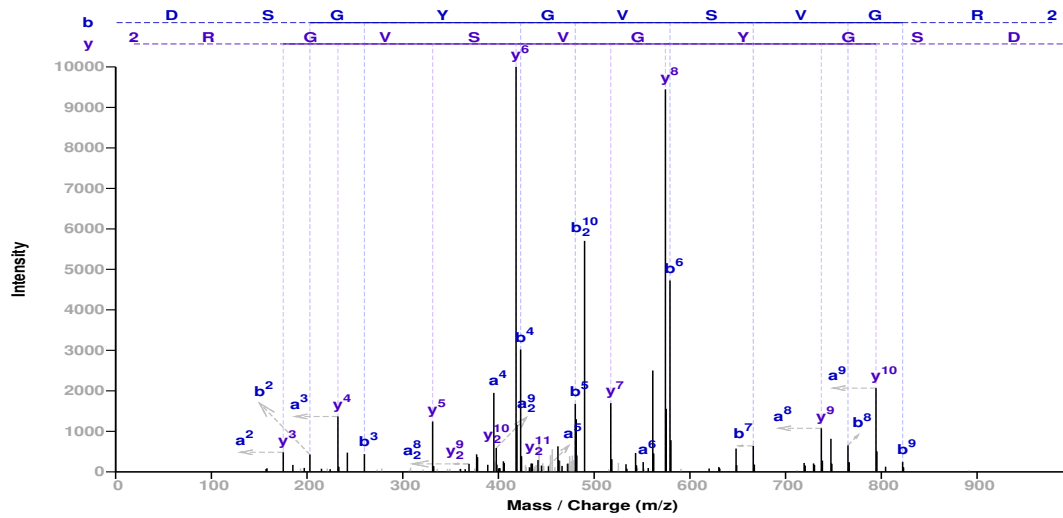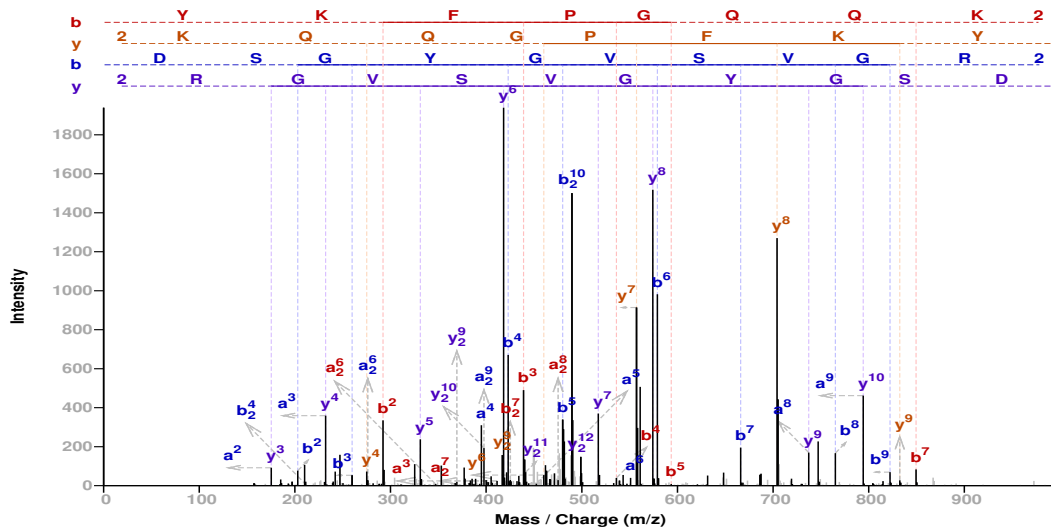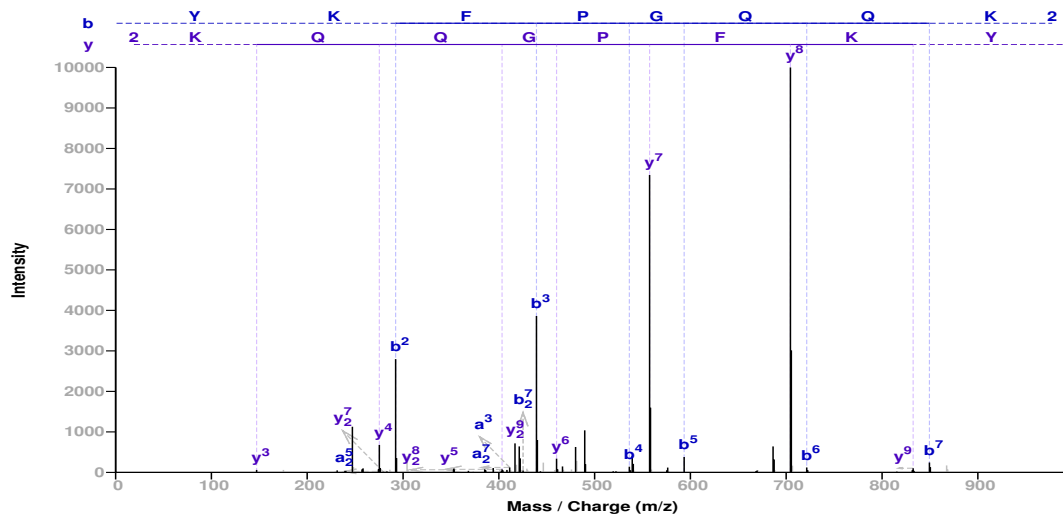

yeast5\_Scan\_Number\_2584 Precursor m/z: 568.293 cosine: 0.808  $\alpha$ : 0.659

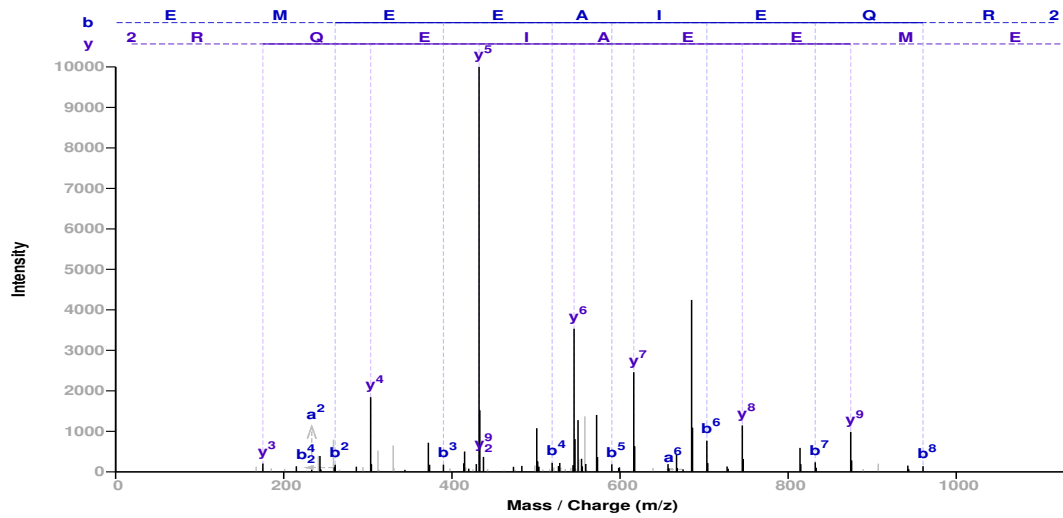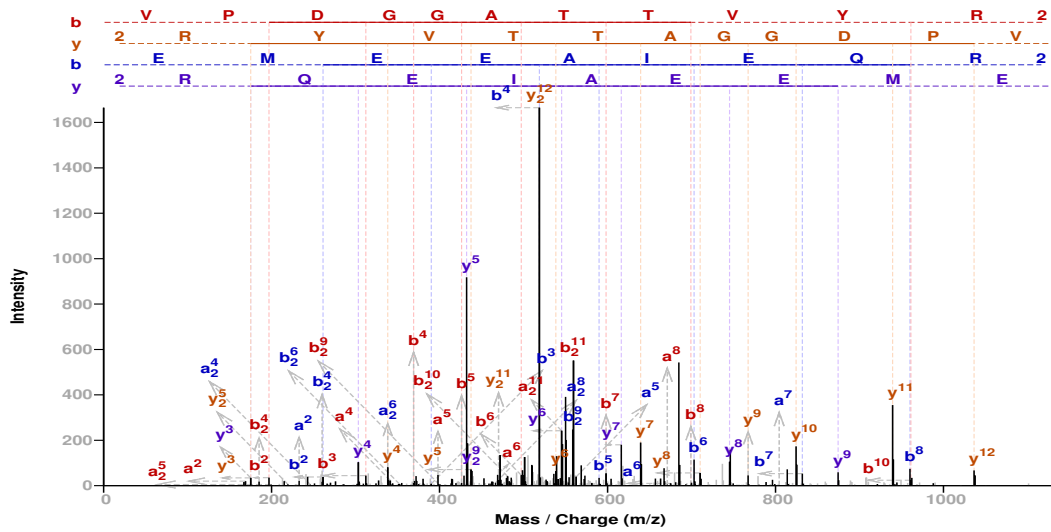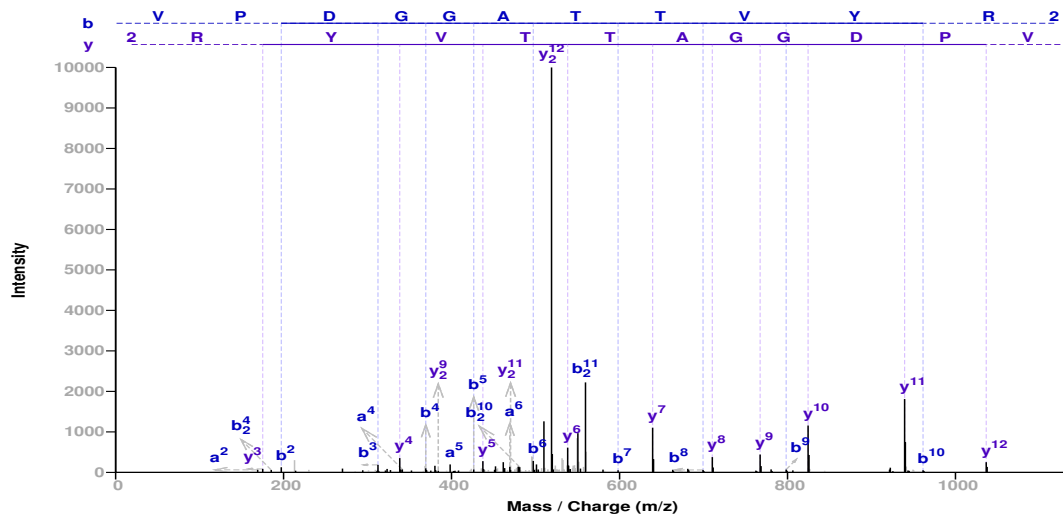

yeast5\_Scan\_Number\_1995 Precursor m/z: 387.219 cosine: 0.841  $\alpha$ : 0.653

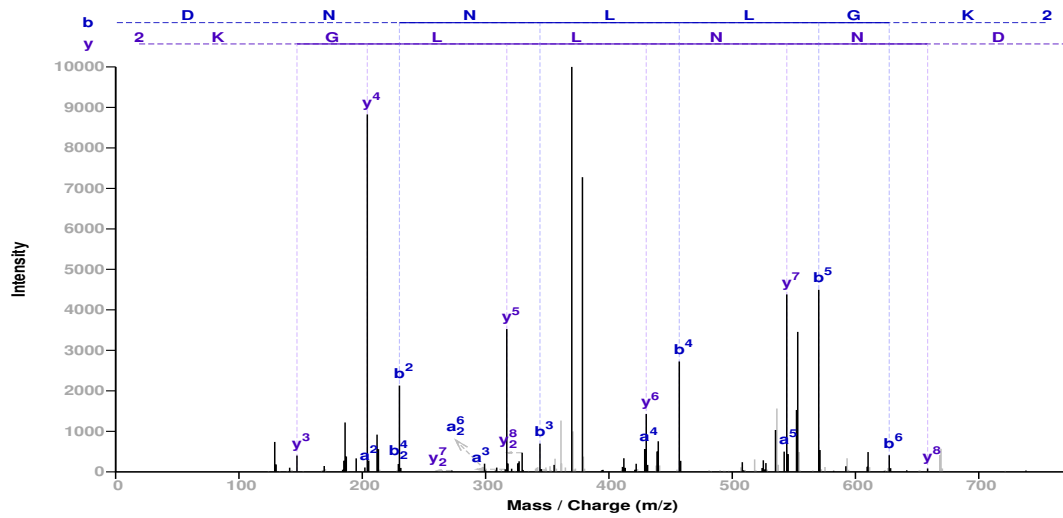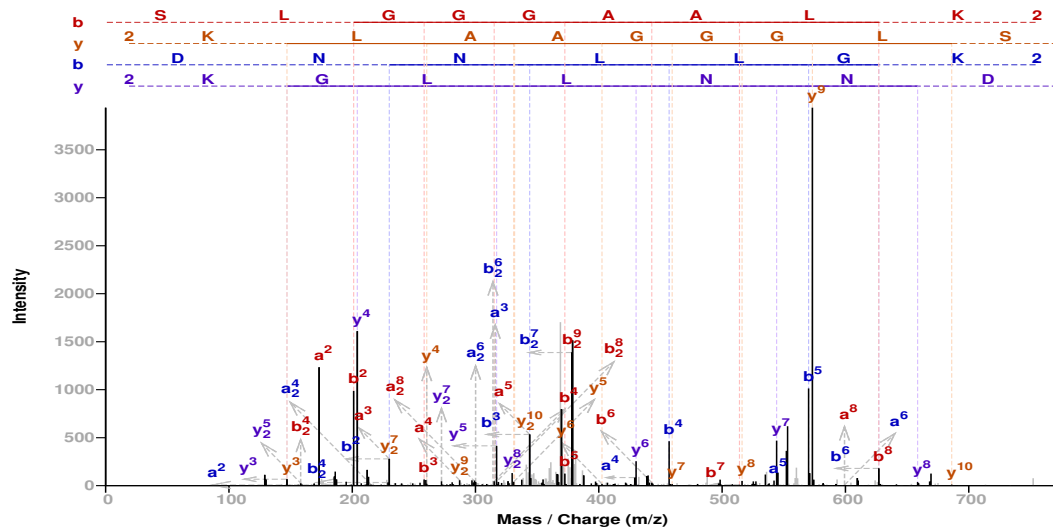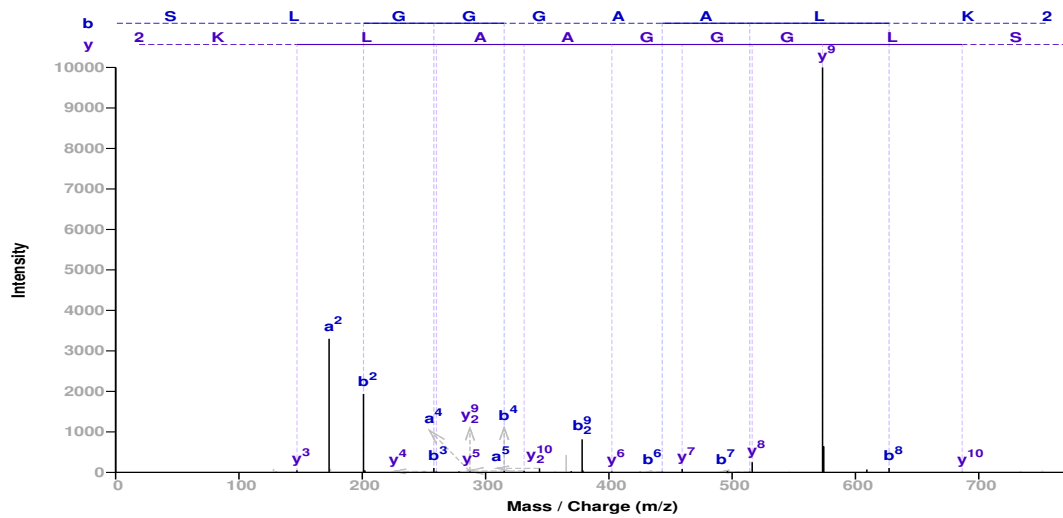

yeast5\_Scan\_Number\_1819 Precursor m/z: 405.201 cosine: 0.731  $\alpha$ : 0.645

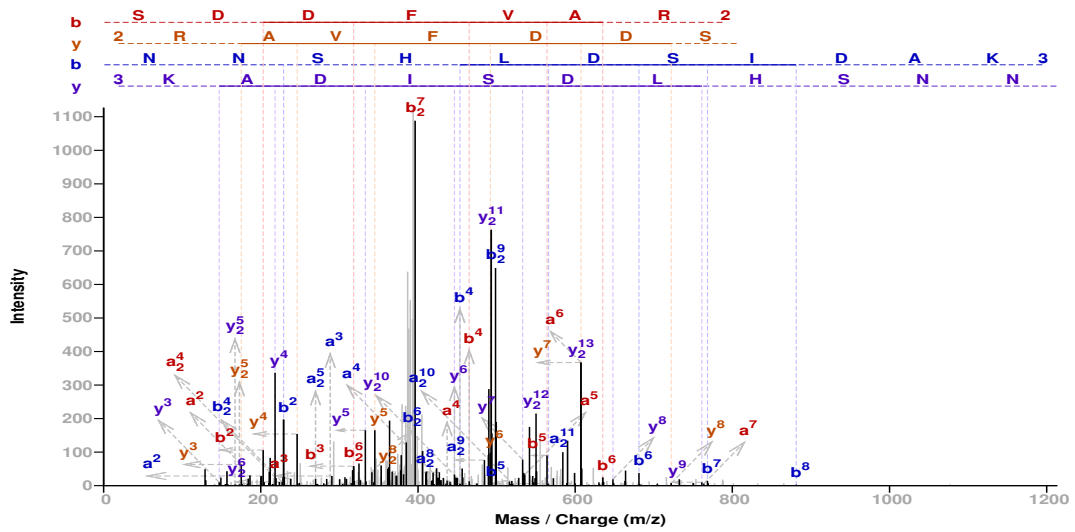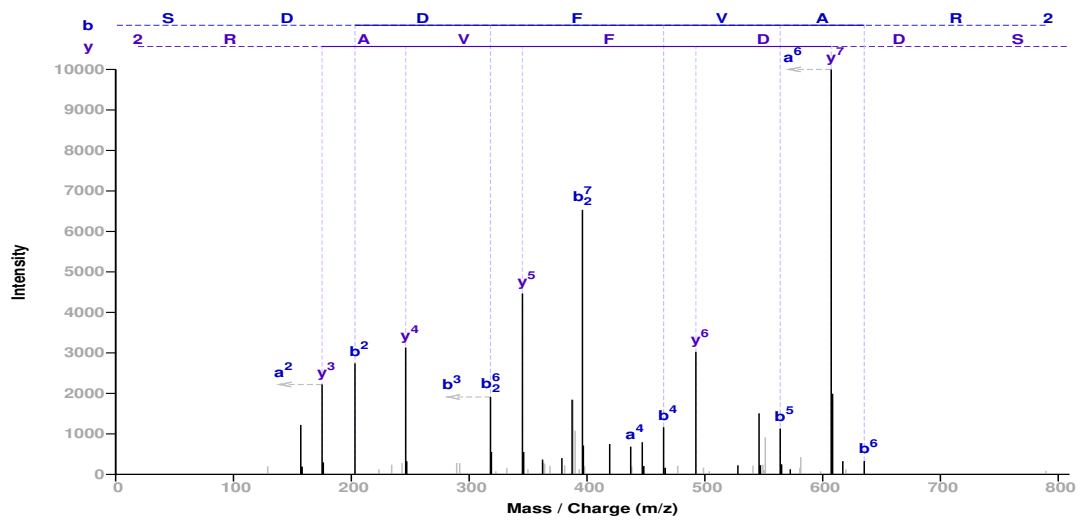

yeast5\_Scan\_Number\_5903 Precursor m/z: 469.738 cosine: 0.740  $\alpha$ : 0.643

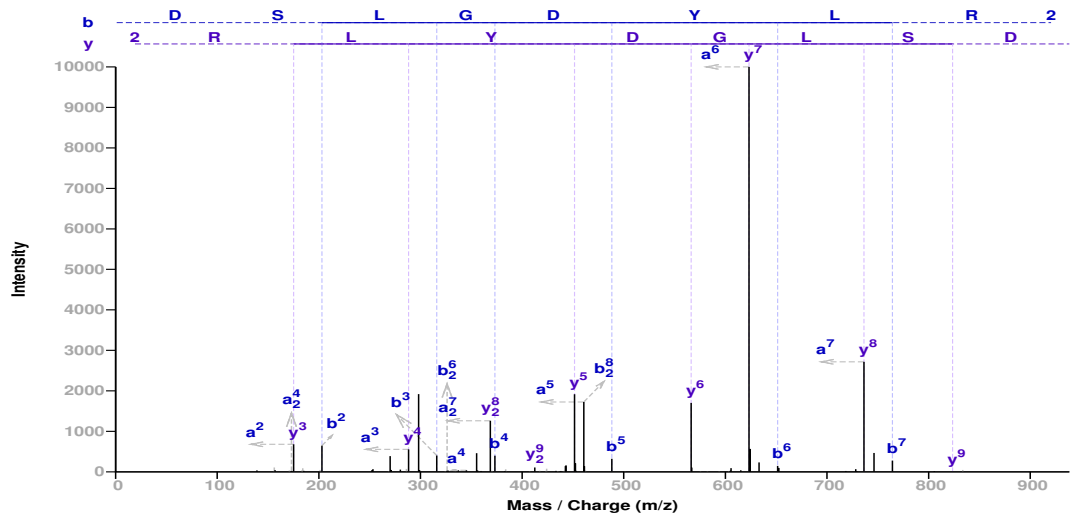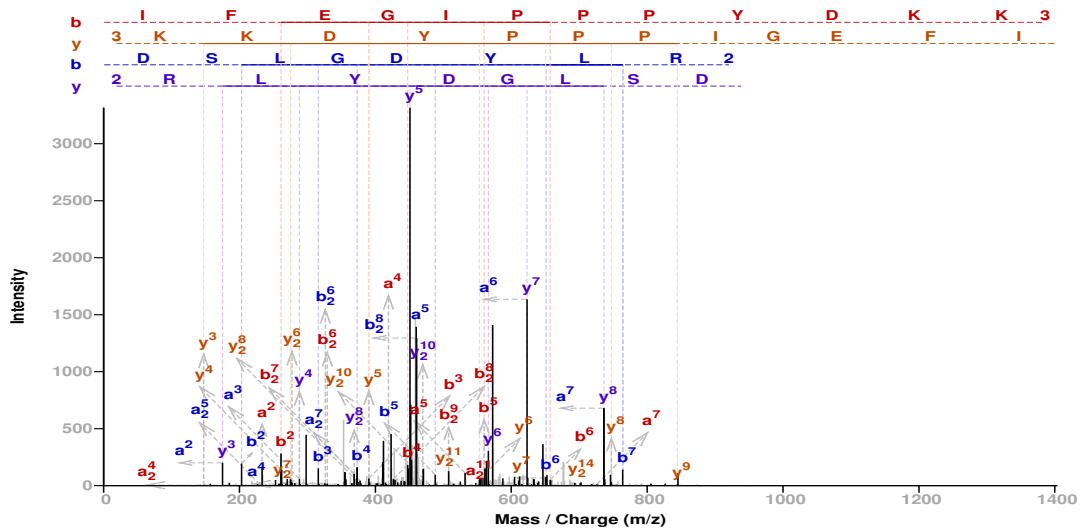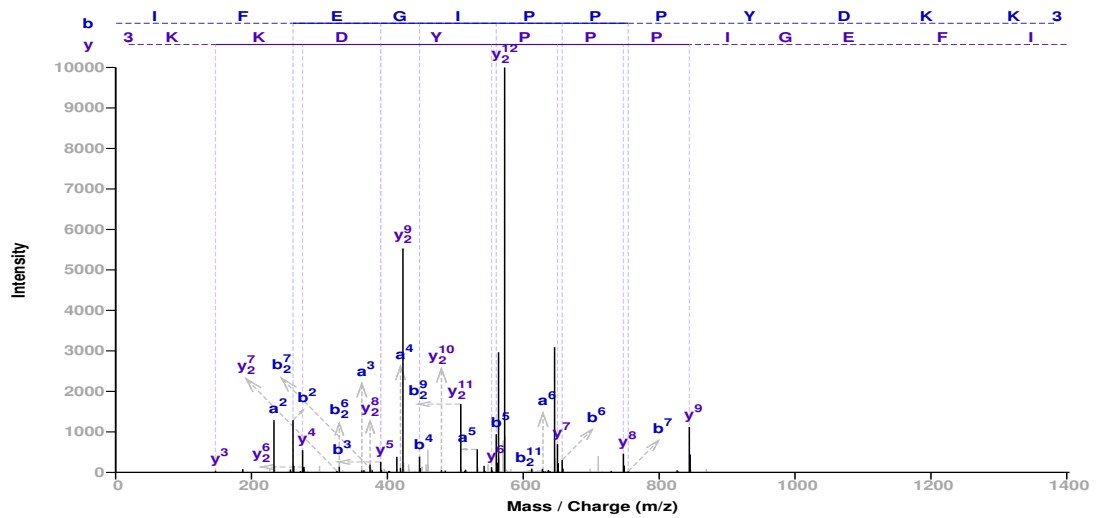

yeast5.Scan\_Number\_2323 Precursor m/z: 424.733 cosine: 0.809  $\alpha$ : 0.643

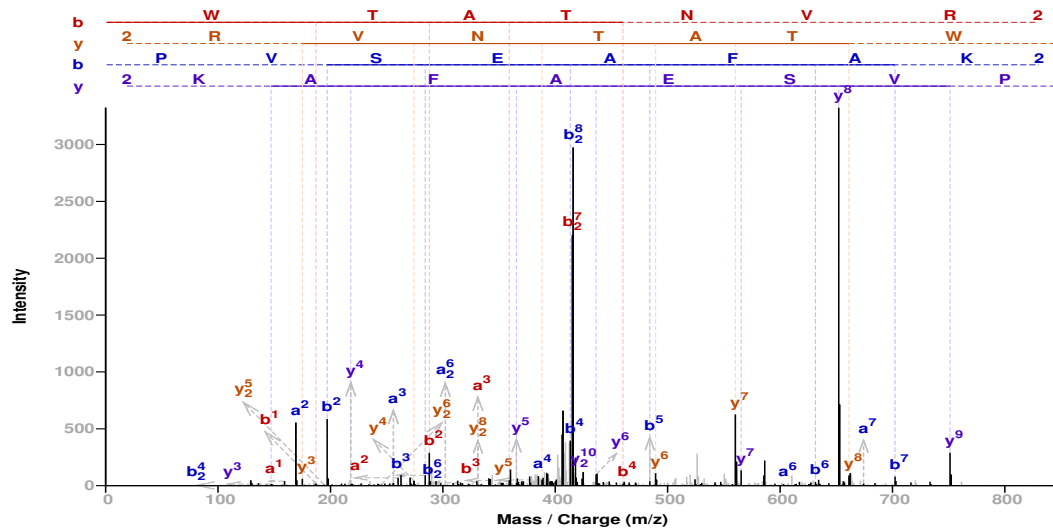

yeast5\_Scan\_Number\_3239 Precursor m/z: 560.274 cosine: 0.748  $\alpha$ : 0.619

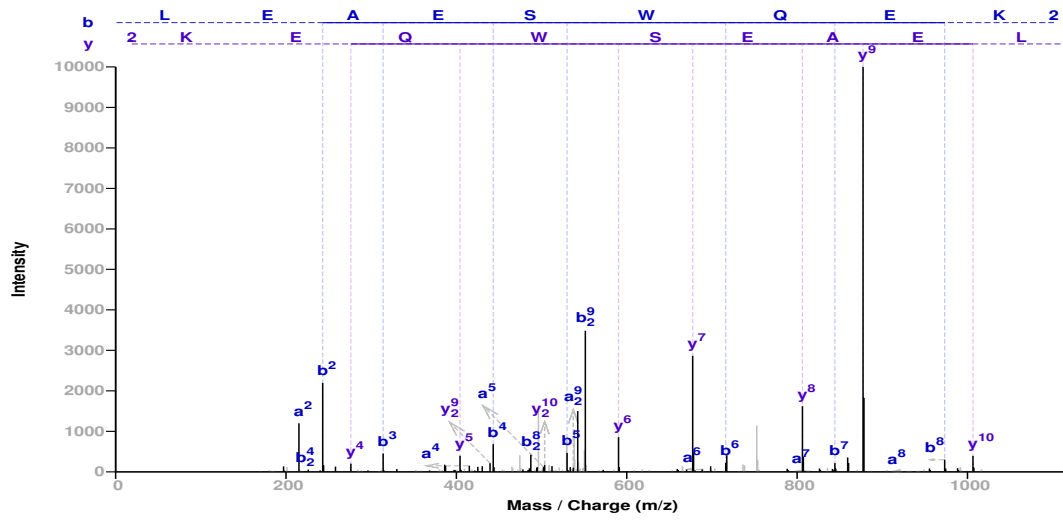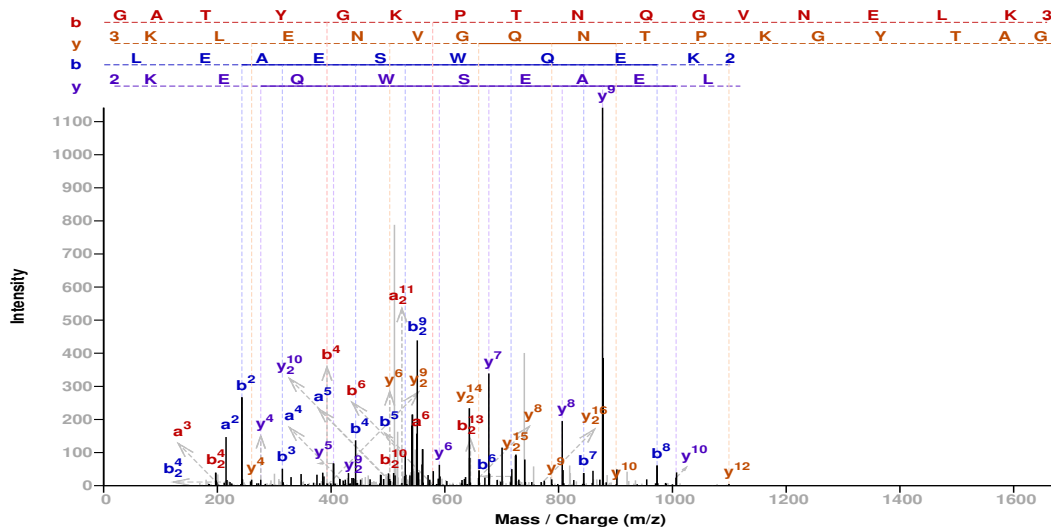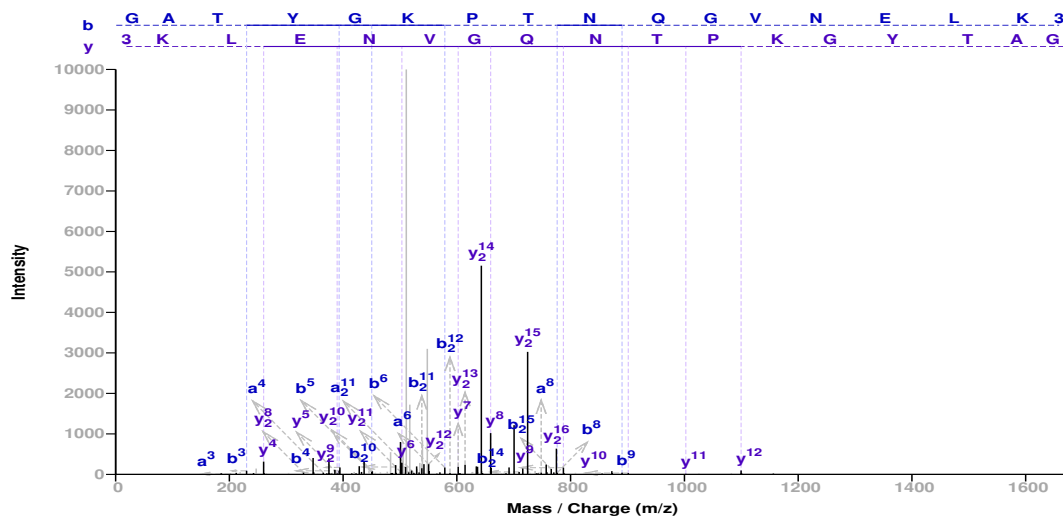

yeast5\_Scan\_Number\_1892 Precursor m/z: 392.735 cosine: 0.880  $\alpha$ : 0.603

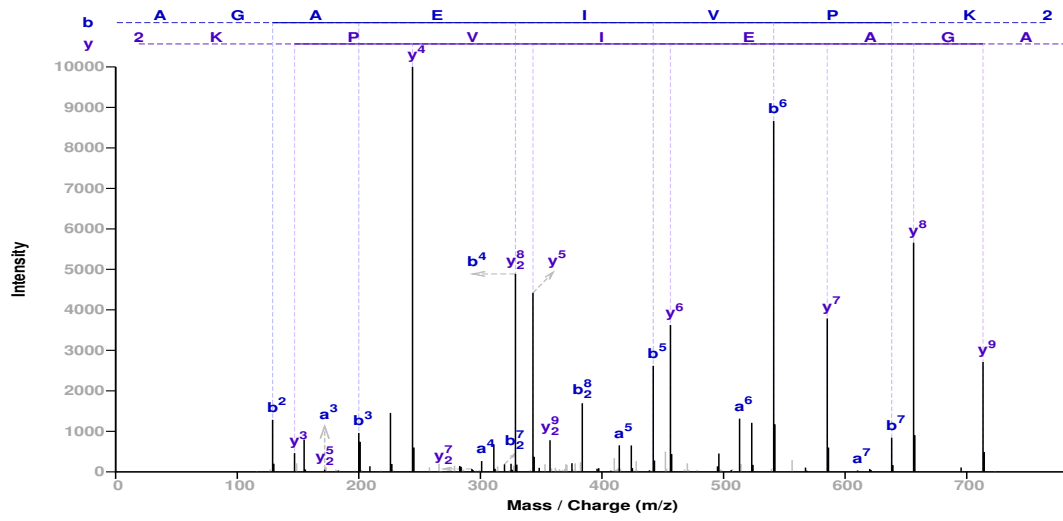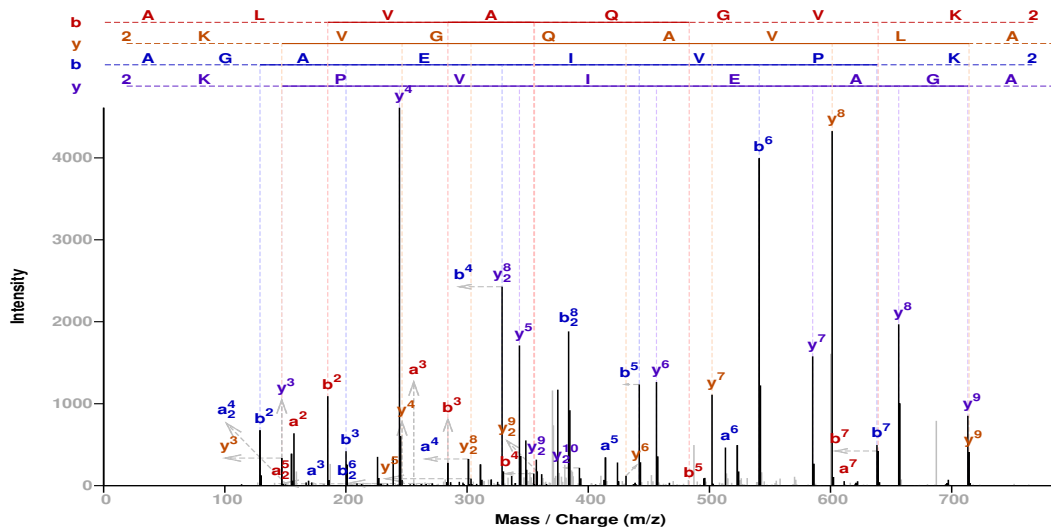



yeast5\_Scan\_Number\_3429 Precursor m/z: 465.259 cosine: 0.744  $\alpha$ : 0.597

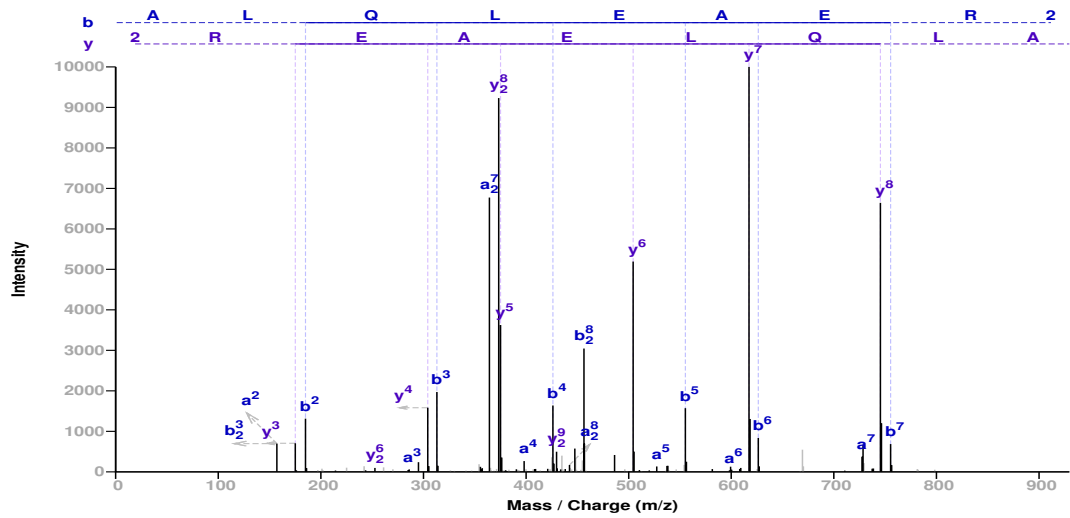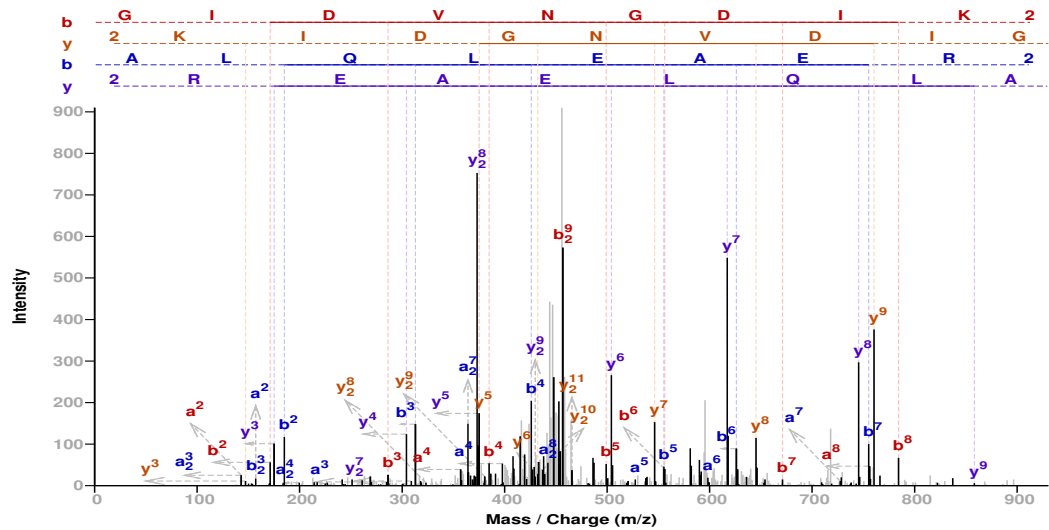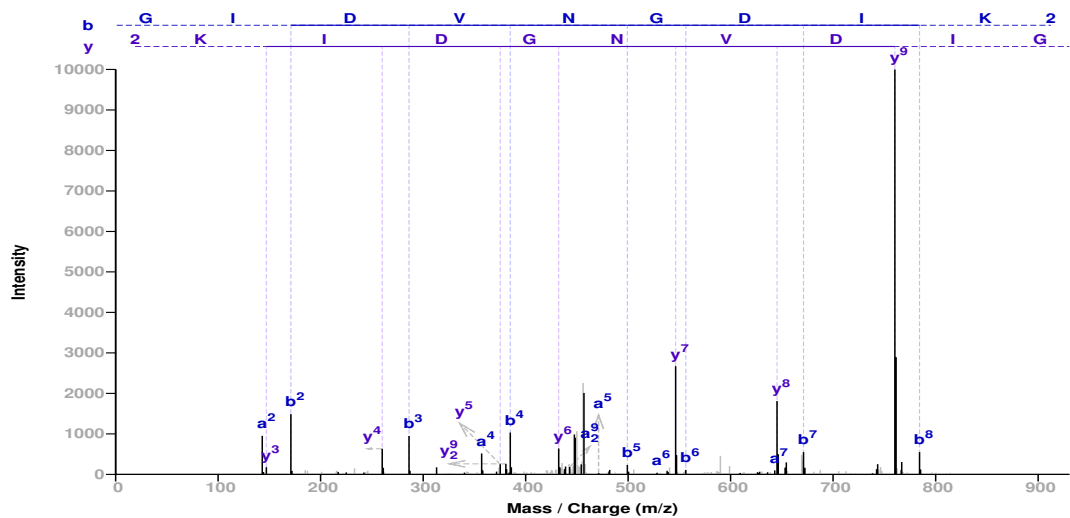

yeast5\_Scan\_Number\_7267 Precursor m/z: 593.337 cosine: 0.909  $\alpha$ : 0.587

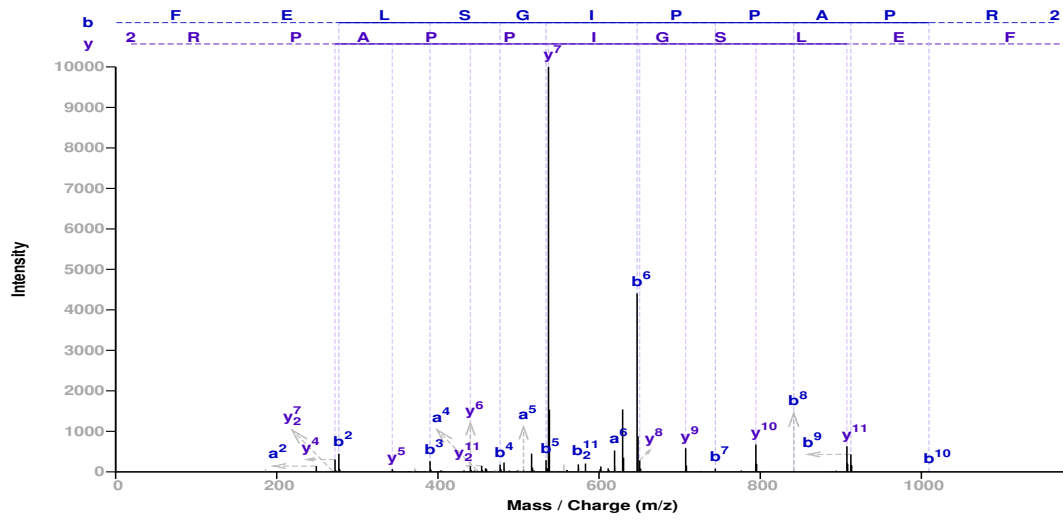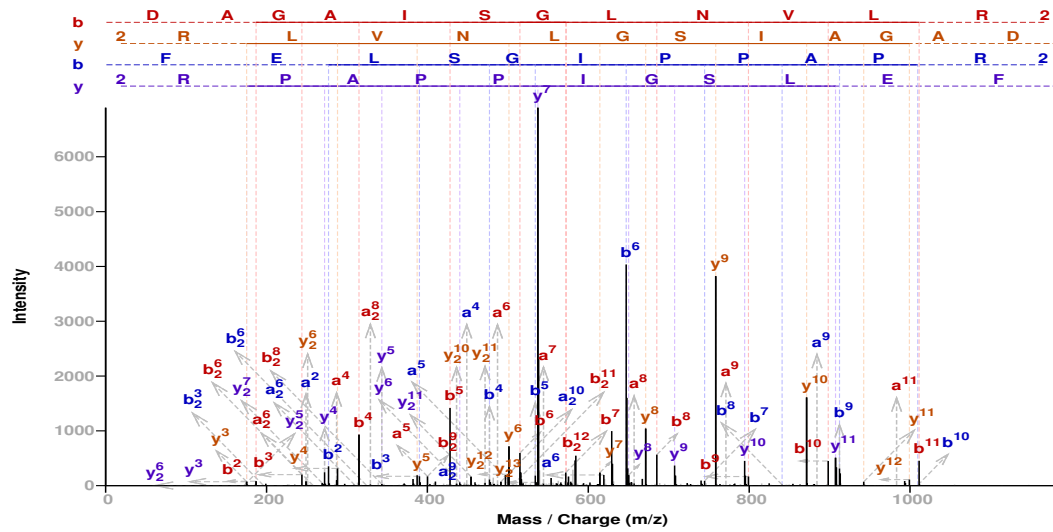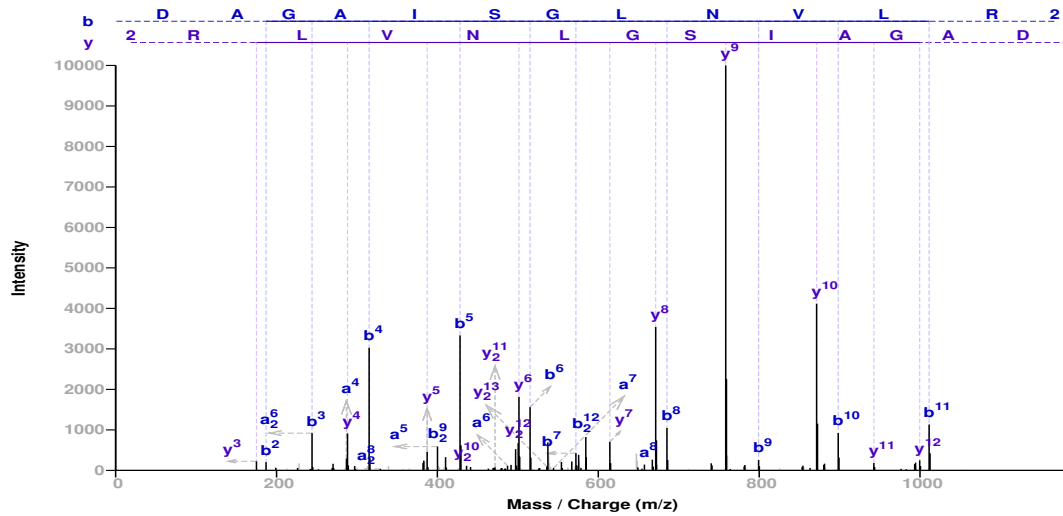

yeast5\_Scan\_Number\_6554 Precursor m/z: 514.813 cosine: 0.782  $\alpha$ : 0.586

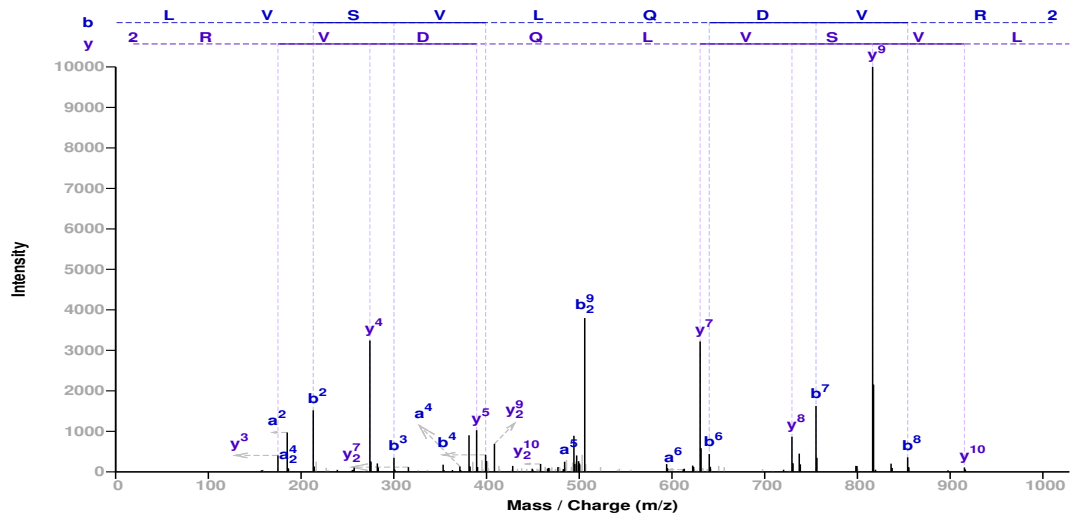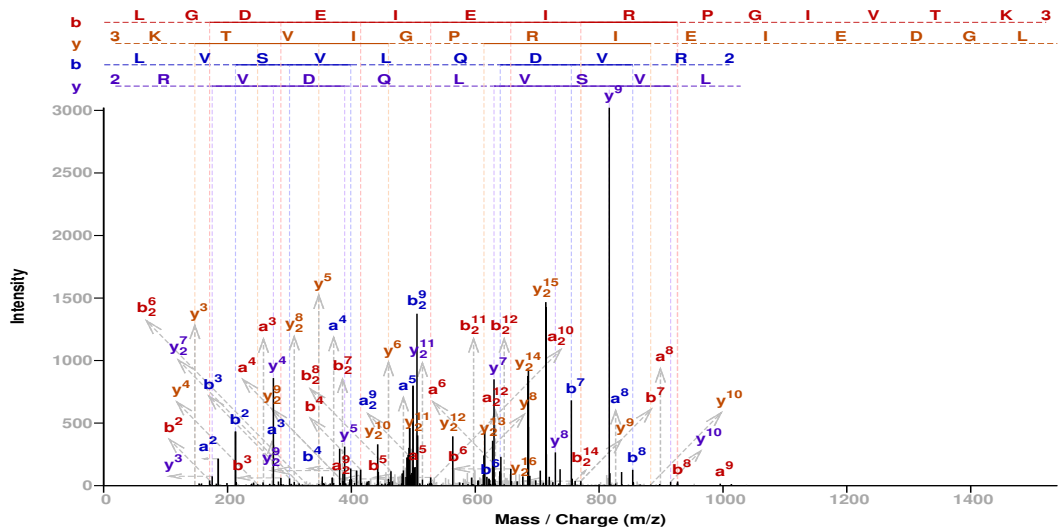

yeast5\_Scan\_Number\_3208 Precursor m/z: 398.875 cosine: 0.727  $\alpha$ : 0.584

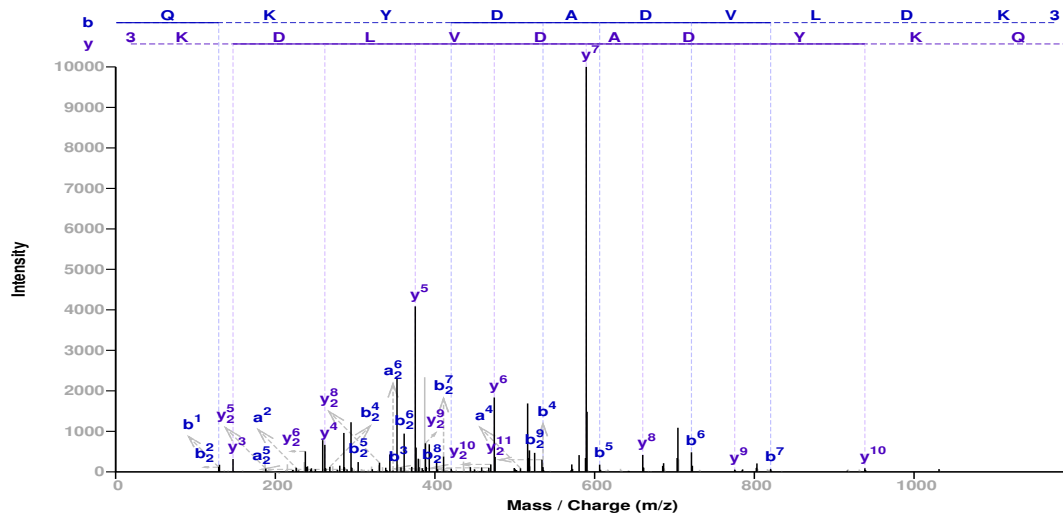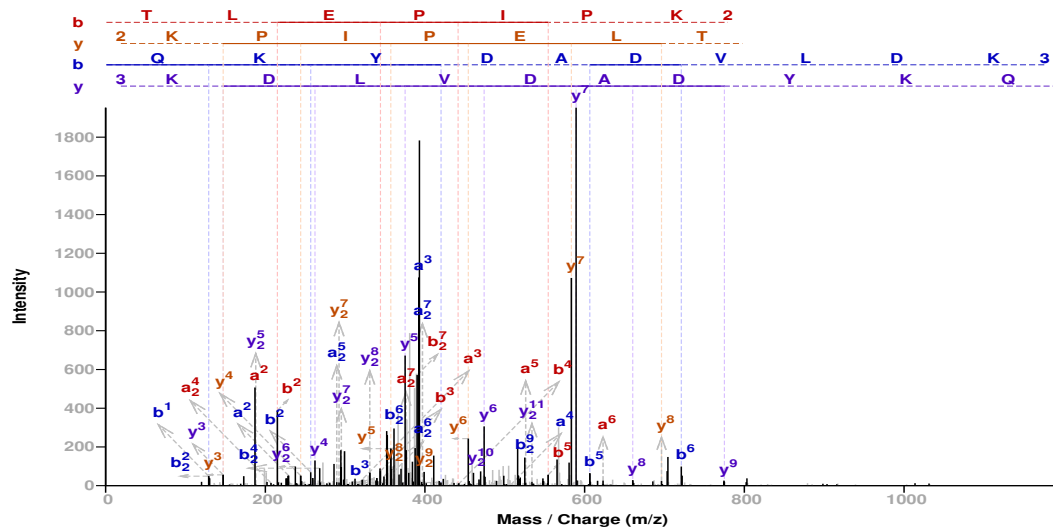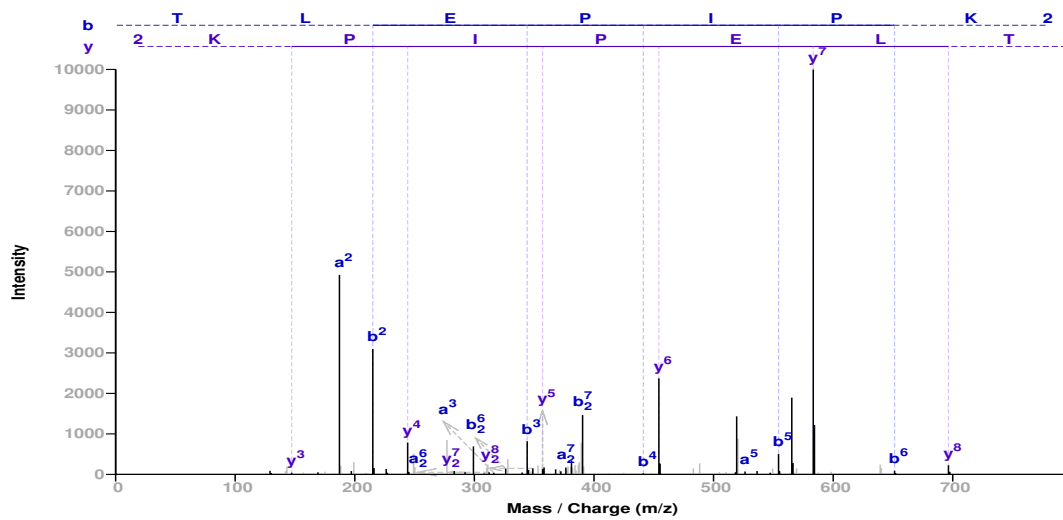

yeast5\_Scan\_Number\_4788 Precursor m/z: 529.808 cosine: 0.736  $\alpha$ : 0.580

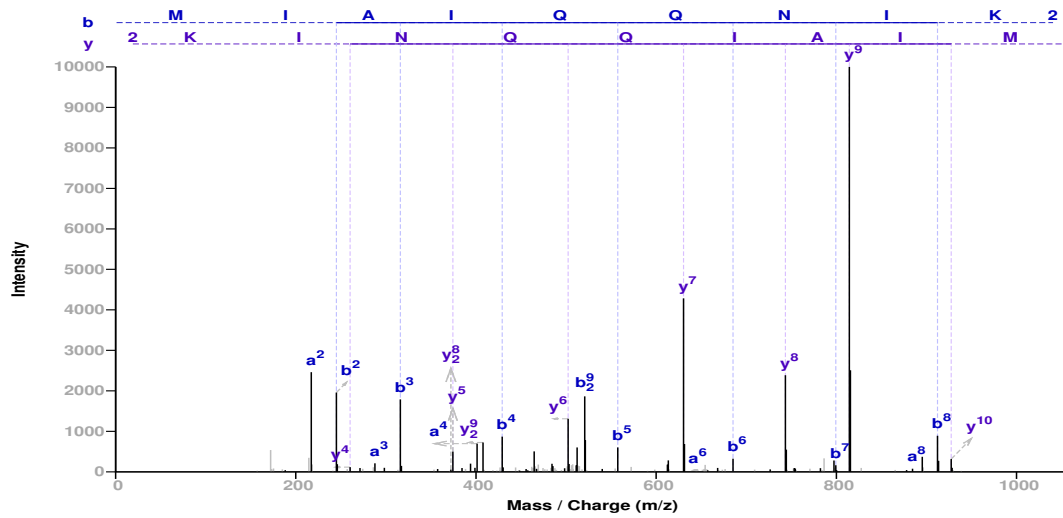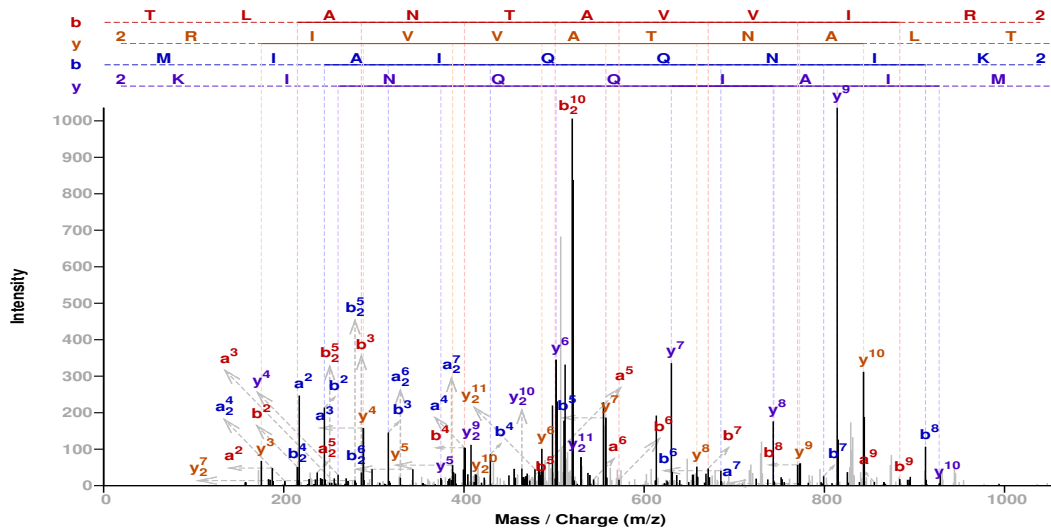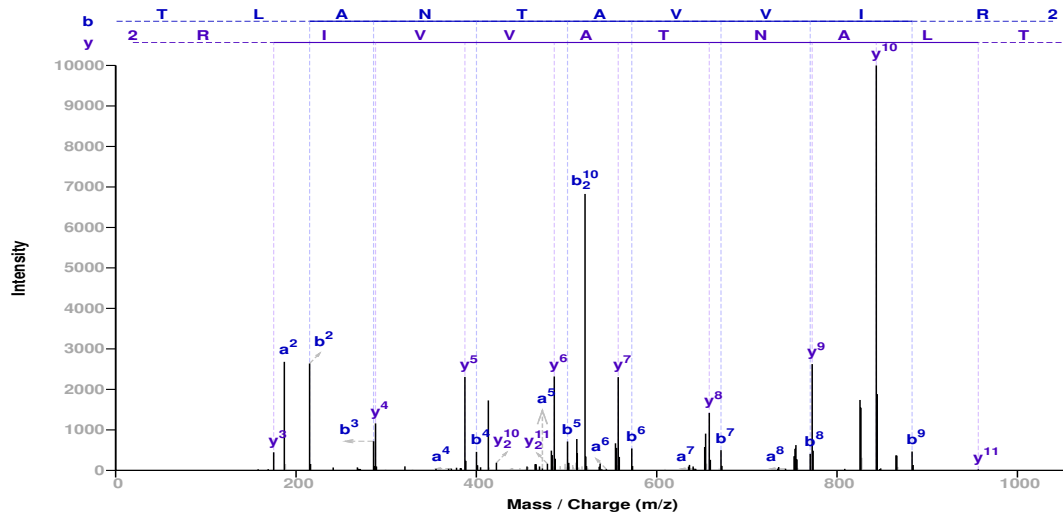

yeast5\_Scan\_Number\_5545 Precursor m/z: 573.332 cosine: 0.831  $\alpha$ : 0.573

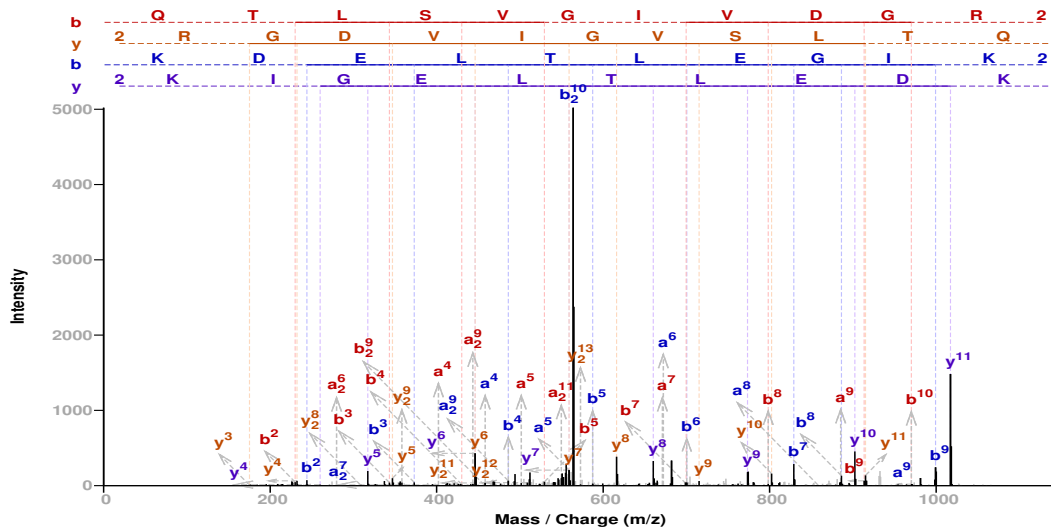

yeast5\_Scan\_Number\_832 Precursor m/z: 430.232 cosine: 0.852  $\alpha$ : 0.563

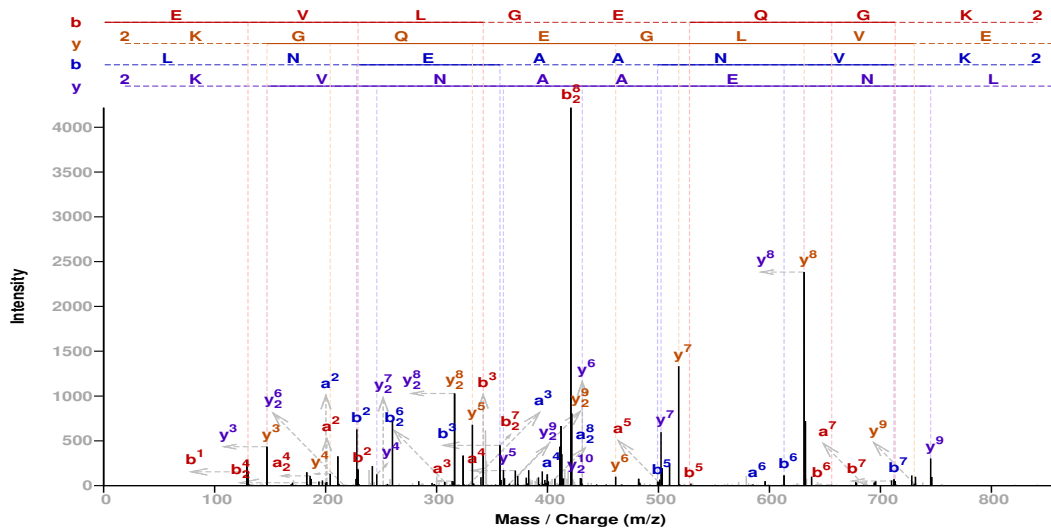

yeast5.Scan\_Number.1911 Precursor m/z: 518.307 cosine: 0.731  $\alpha$ : 0.547

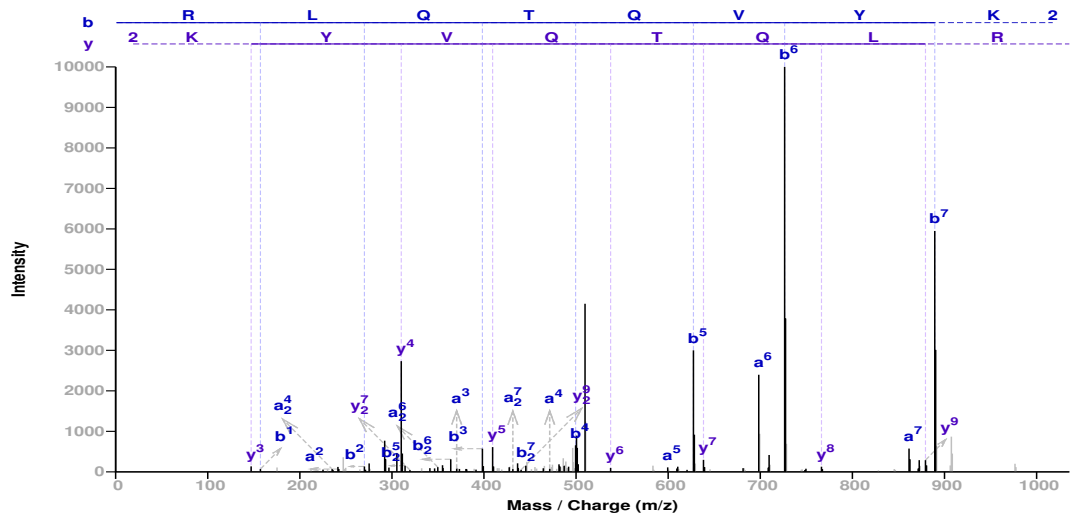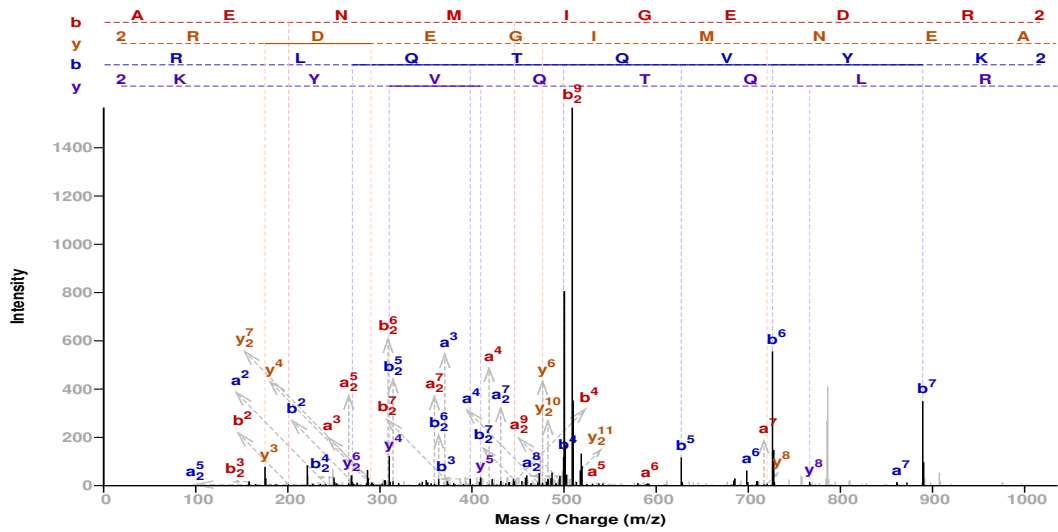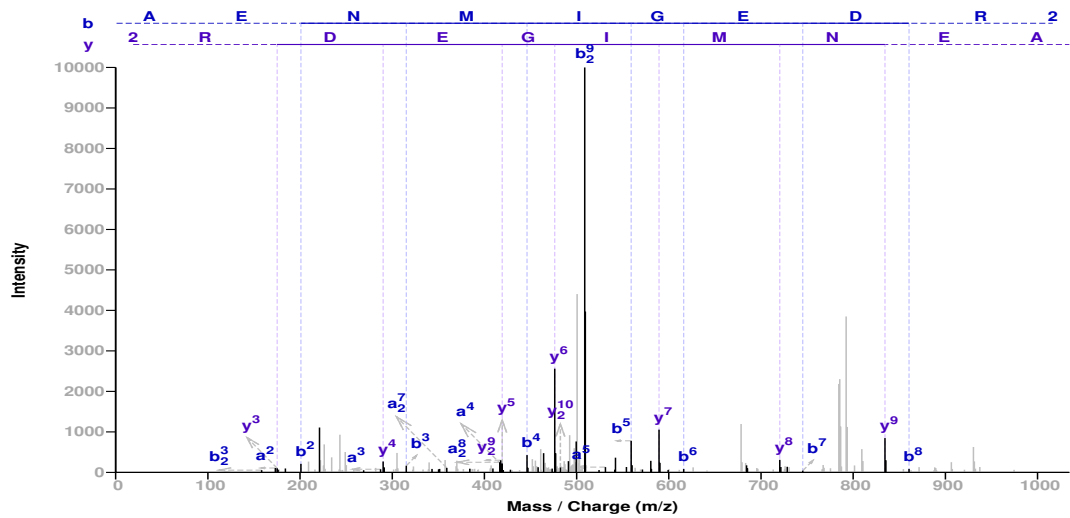



yeast5.Scan\_Number\_518 Precursor m/z: 442.749 cosine: 0.867  $\alpha$ : 0.539

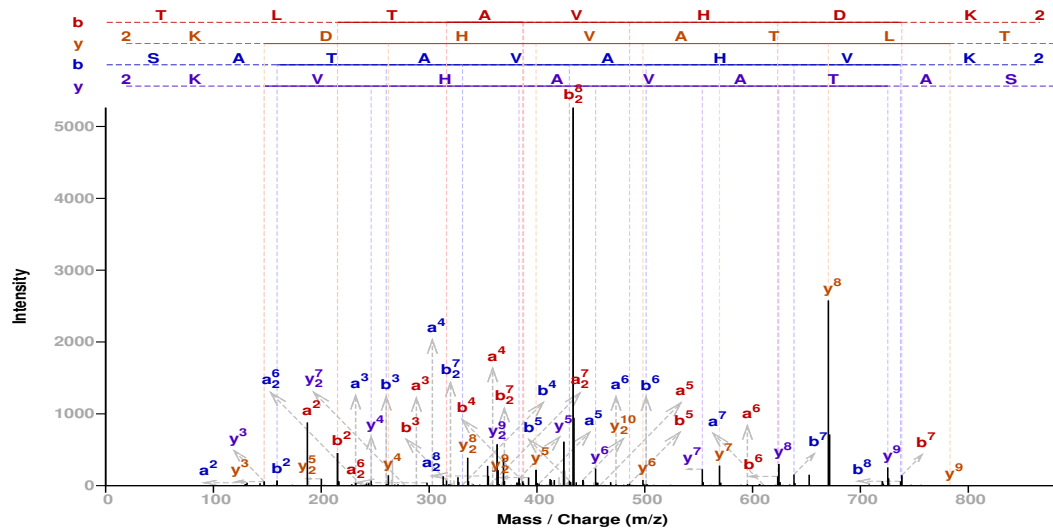



yeast5\_Scan\_Number\_7812 Precursor m/z: 657.336 cosine: 0.745  $\alpha$ : 0.532

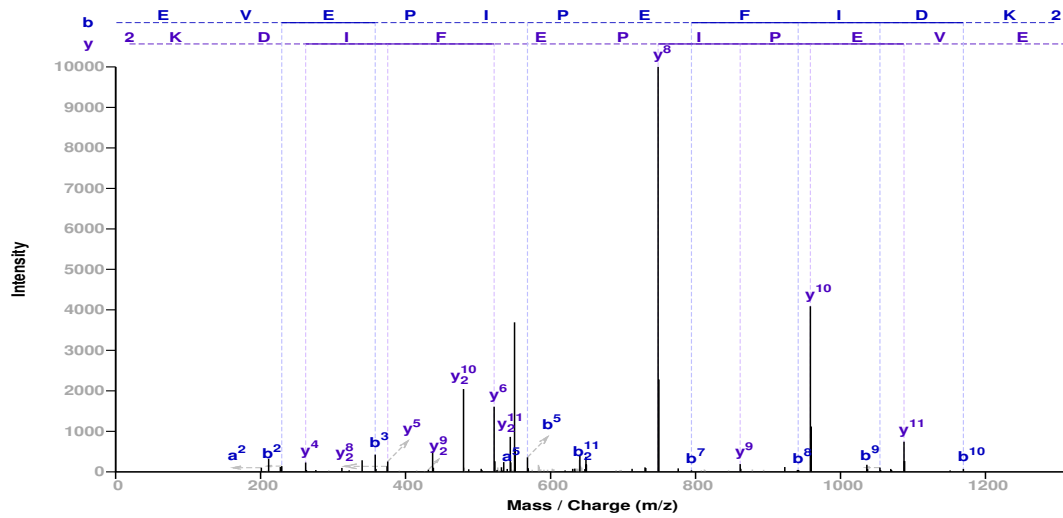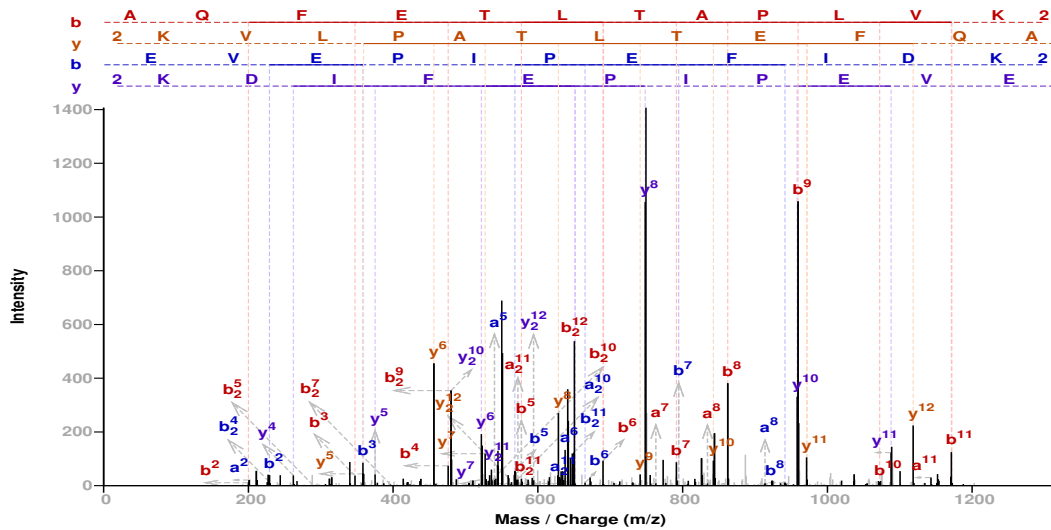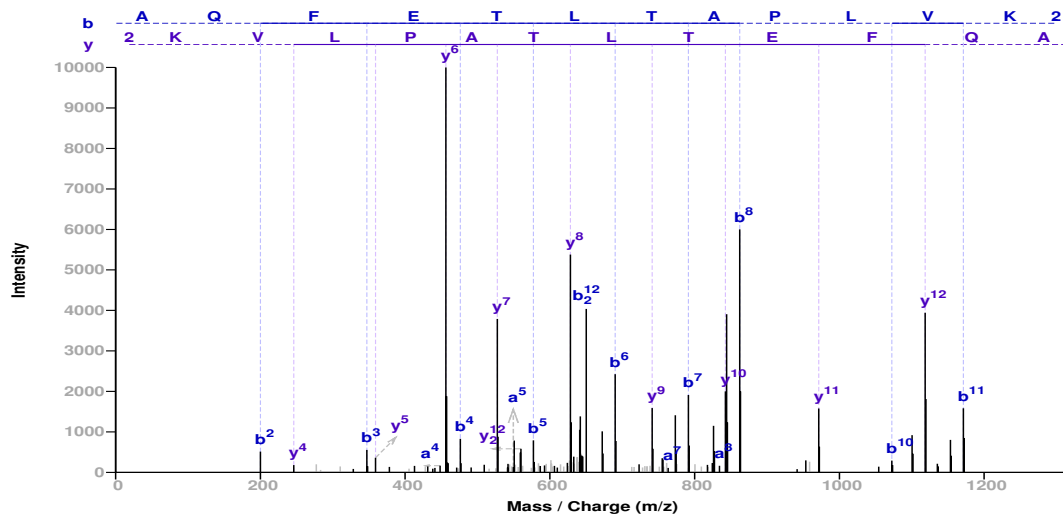

yeast5\_Scan\_Number\_3057 Precursor m/z: 447.231 cosine: 0.808  $\alpha$ : 0.531

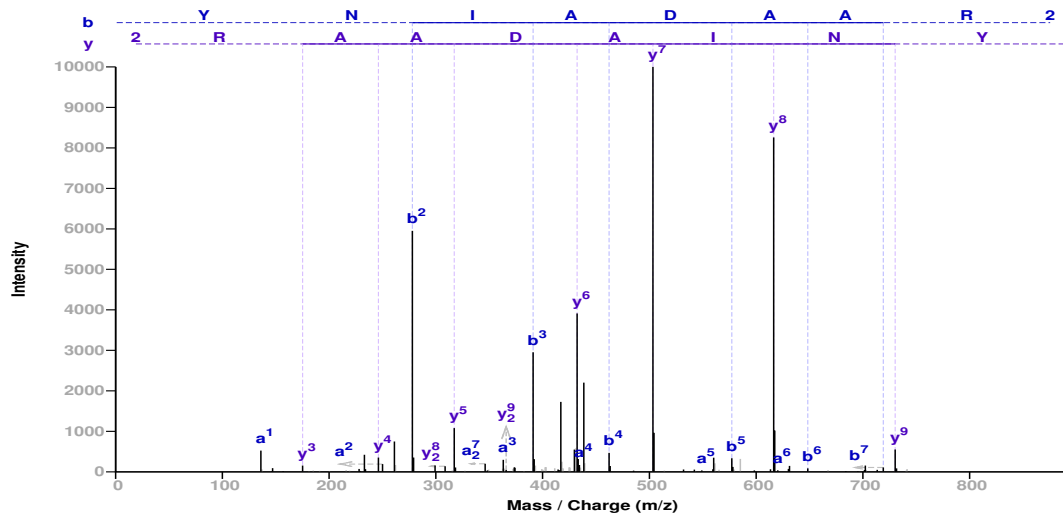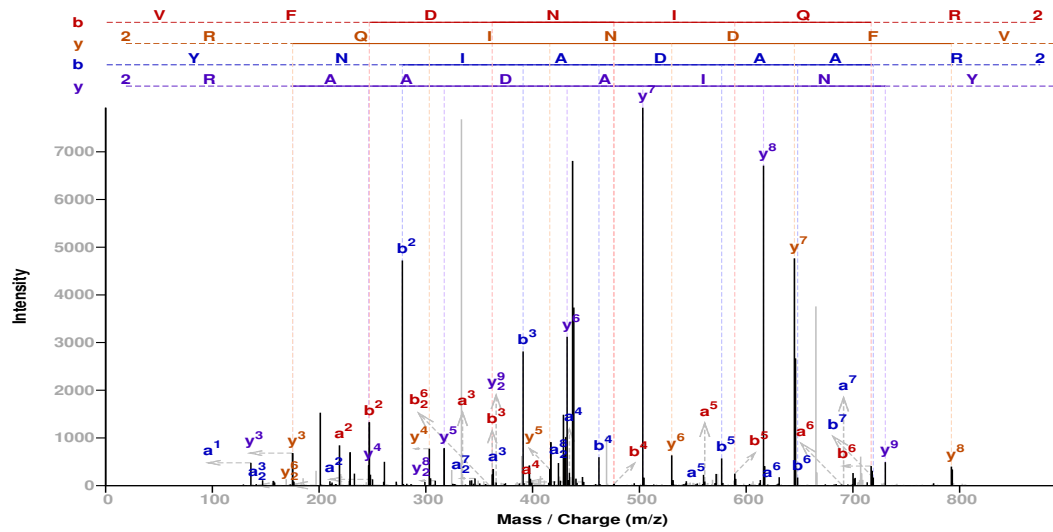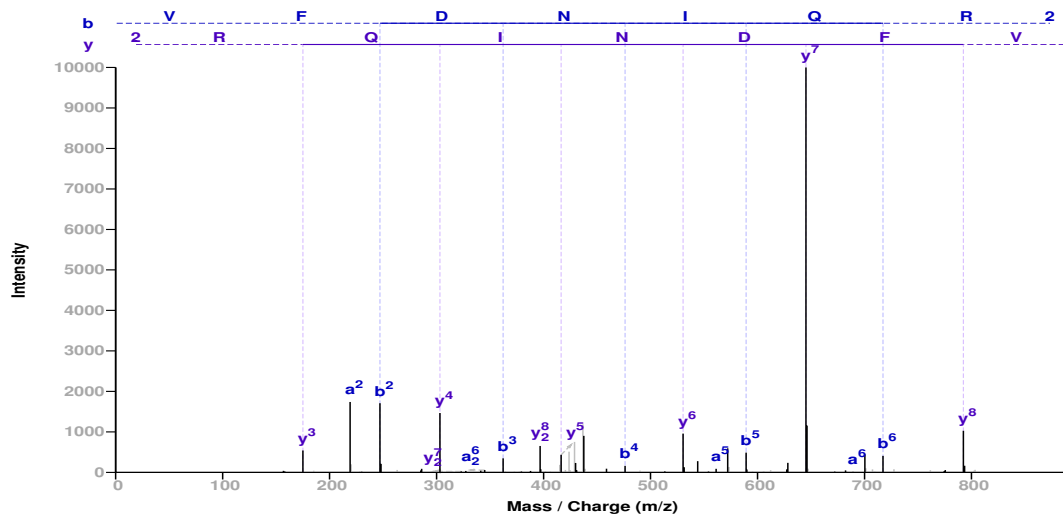

yeast5\_Scan\_Number\_1897 Precursor m/z: 467.743 cosine: 0.786  $\alpha$ : 0.524

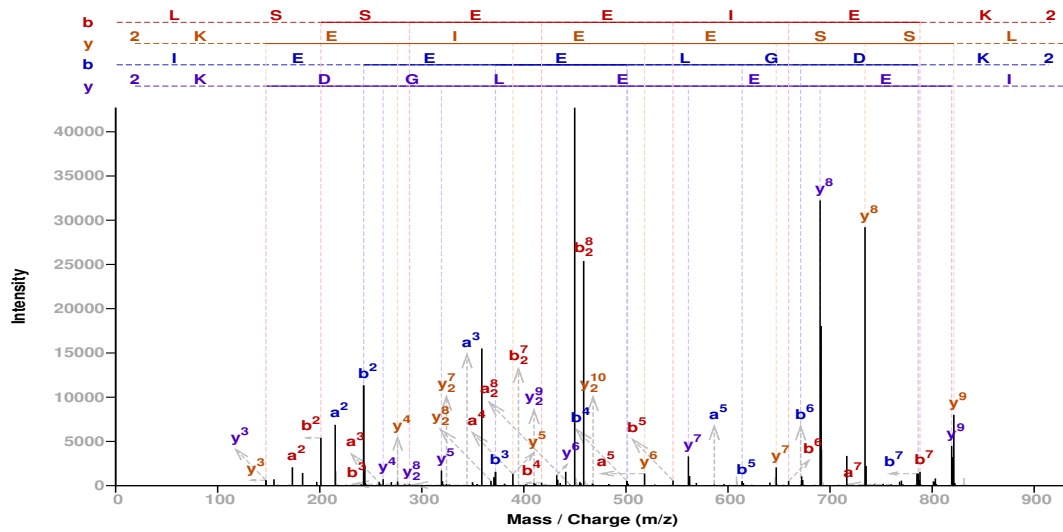

yeast5\_Scan\_Number\_2823 Precursor m/z: 613.340 cosine: 0.765  $\alpha$ : 0.518

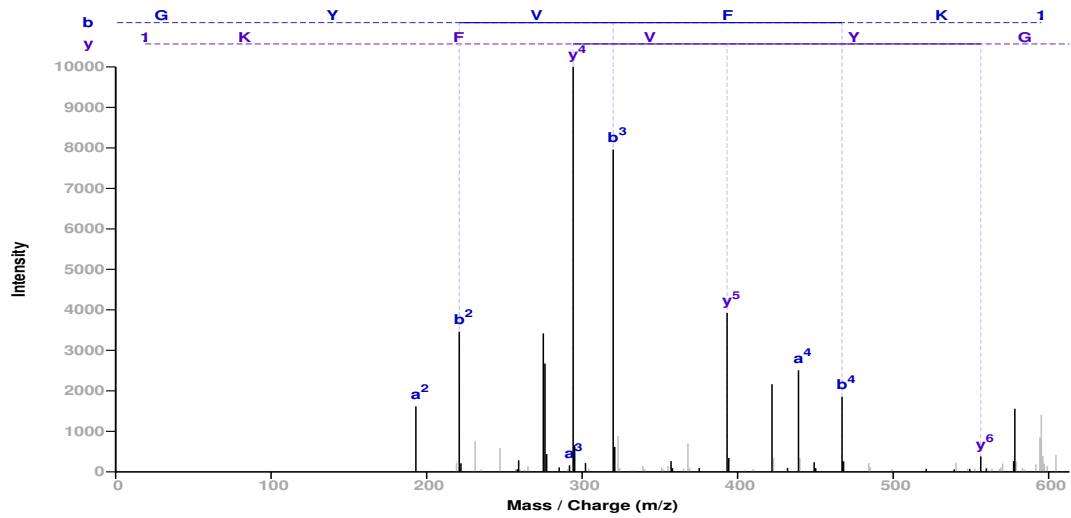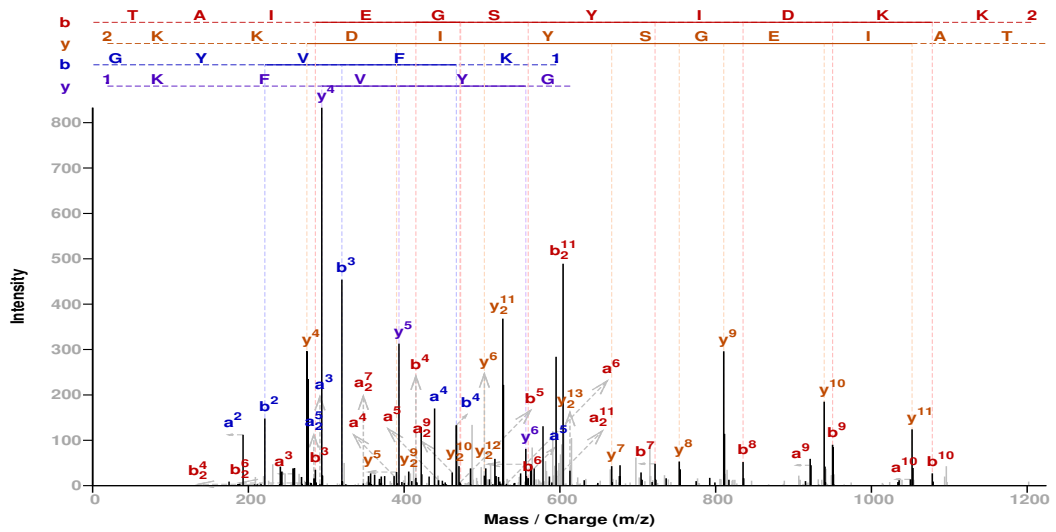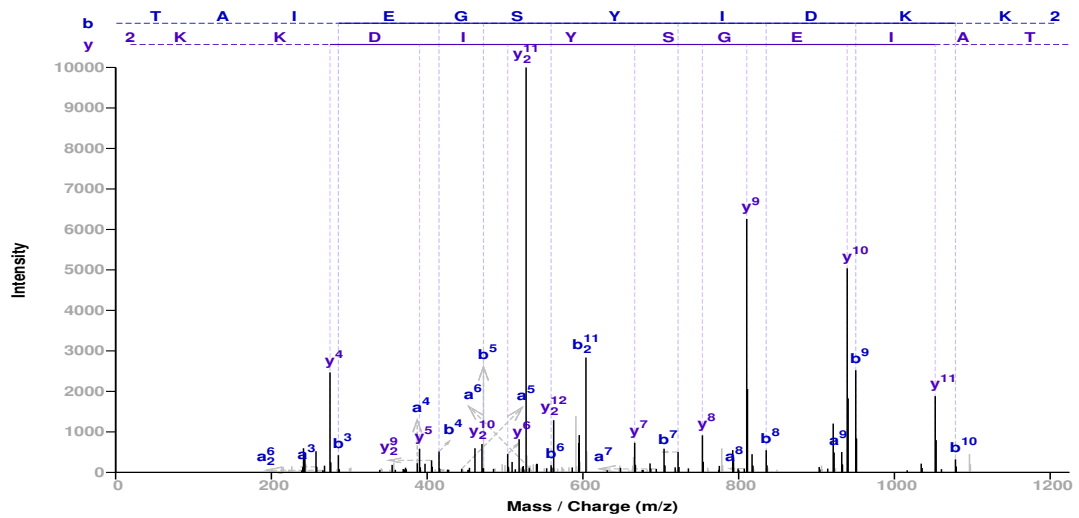



yeast5\_Scan\_Number\_1614 Precursor m/z: 452.266 cosine: 0.784  $\alpha$ : 0.509

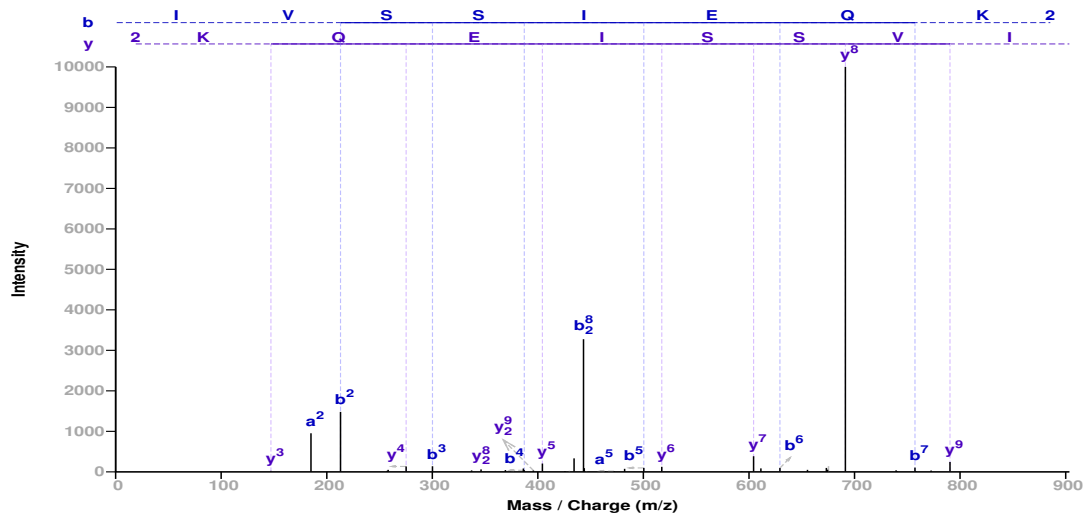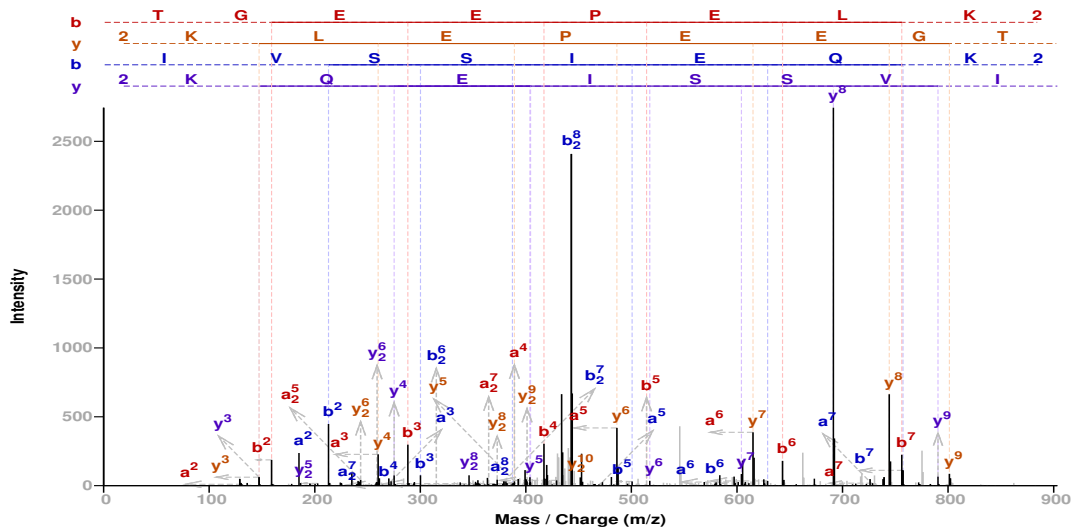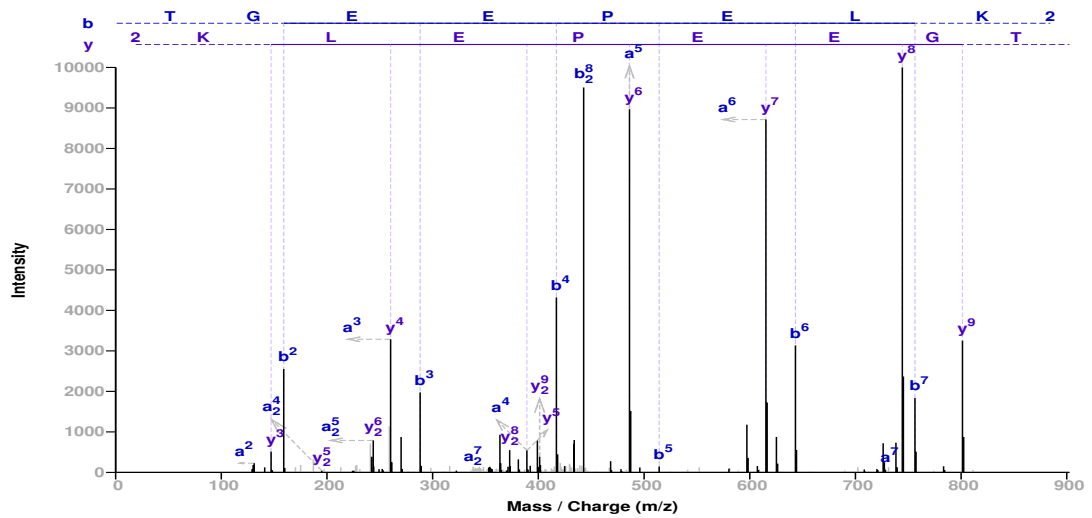



yeast5\_Scan\_Number\_2856 Precursor m/z: 423.898 cosine: 0.815  $\alpha$ : 0.493

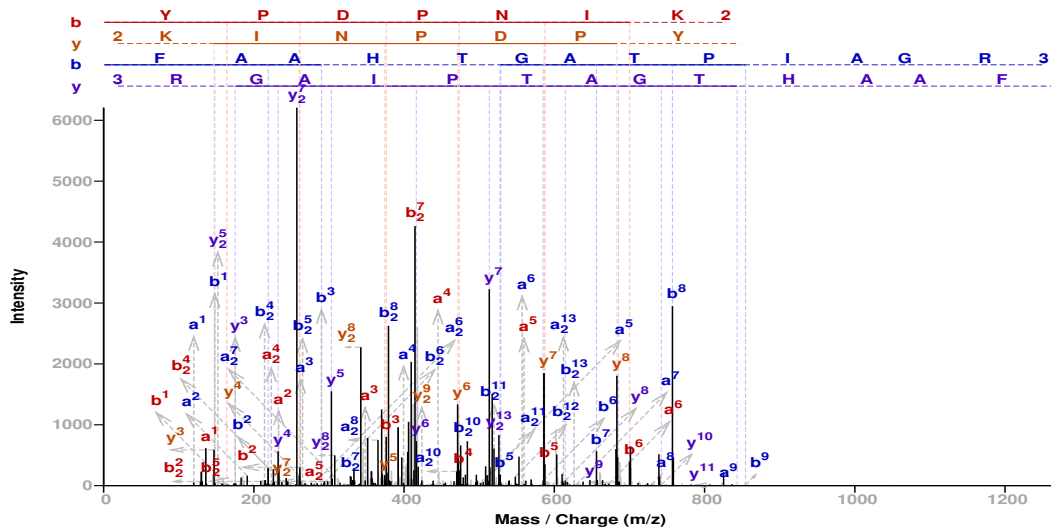

yeast5\_Scan\_Number\_6695 Precursor m/z: 639.344 cosine: 0.798  $\alpha$ : 0.481

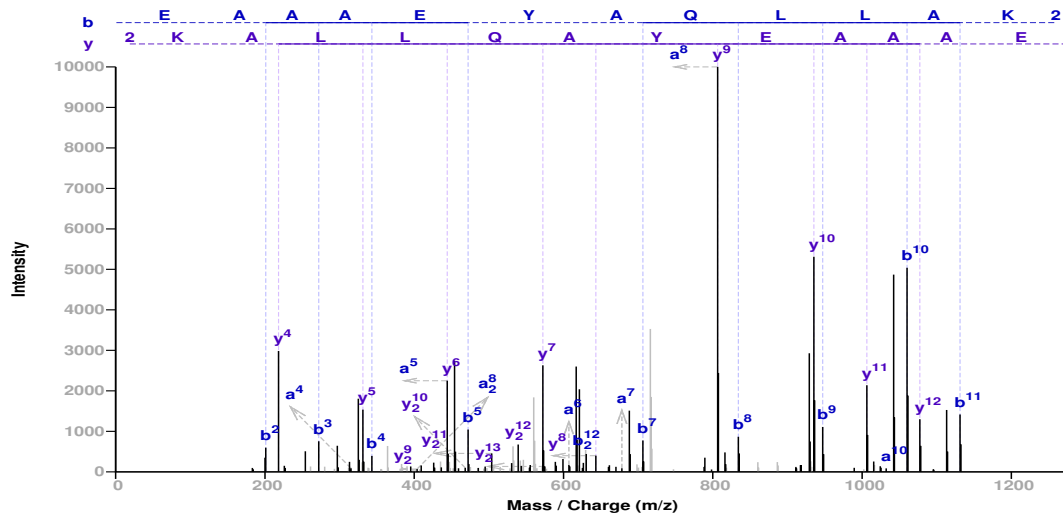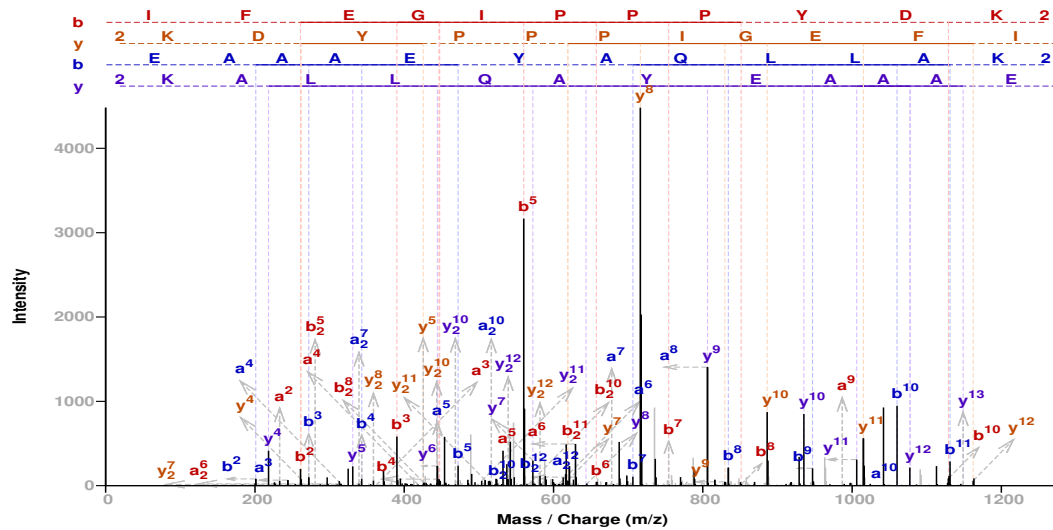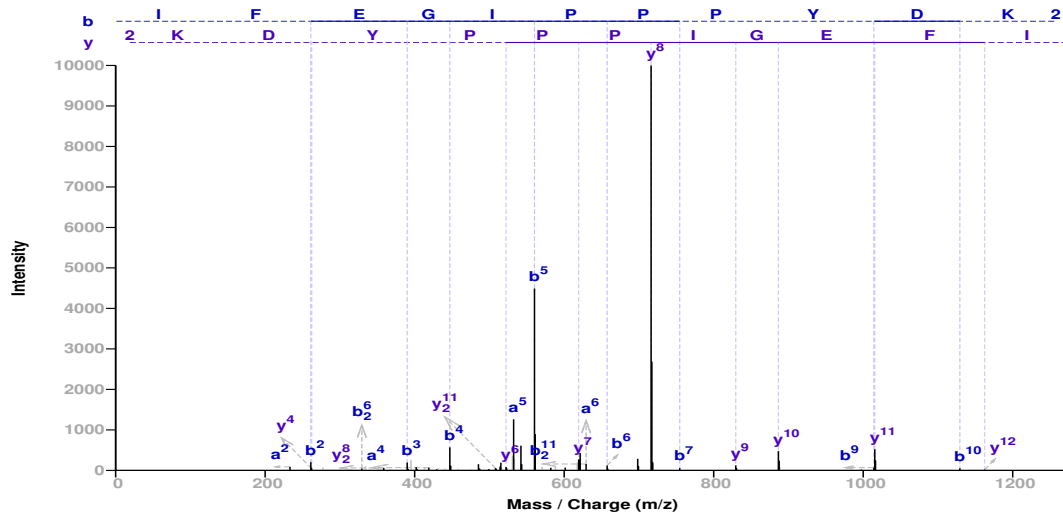

yeast5\_Scan\_Number\_5369 Precursor m/z: 488.284 cosine: 0.818  $\alpha$ : 0.480

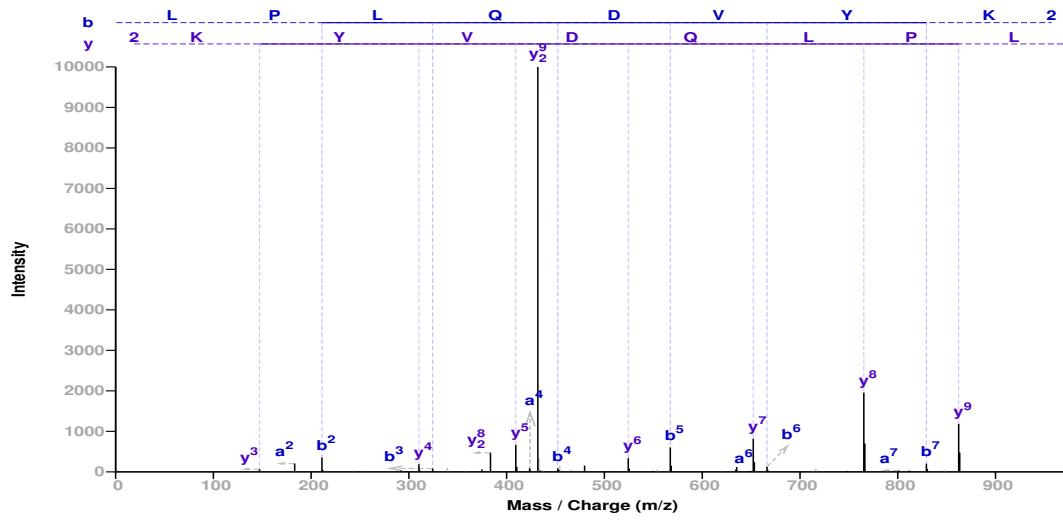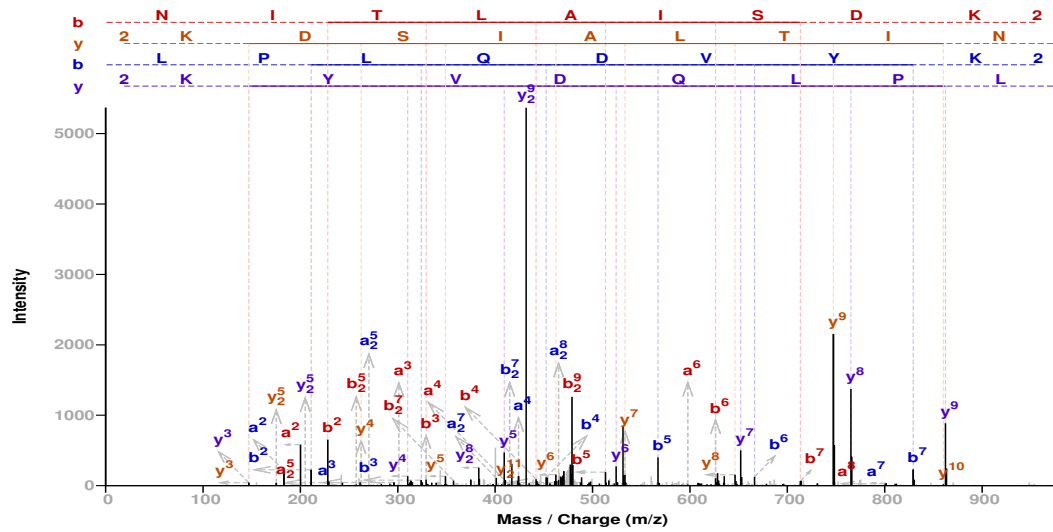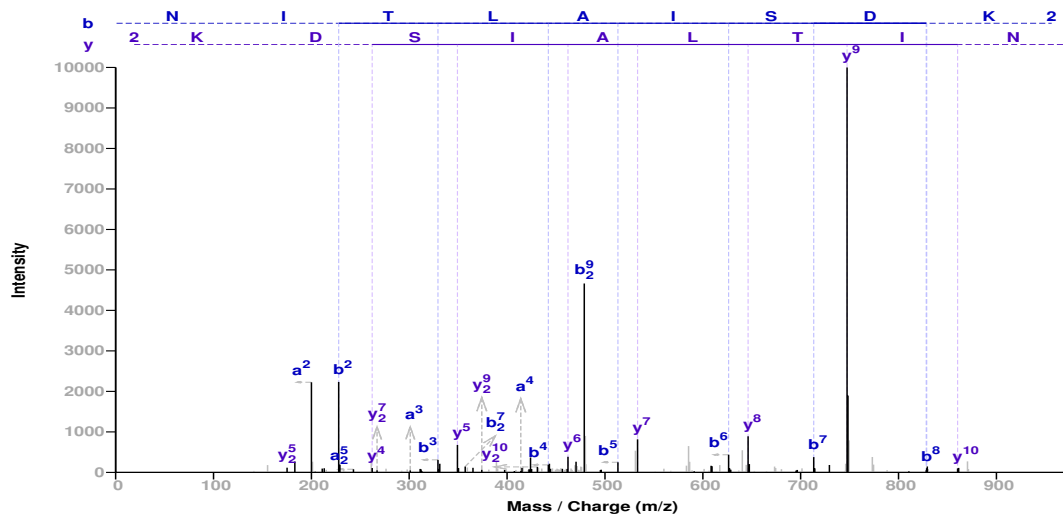

yeast5.Scan\_Number\_4627 Precursor m/z: 403.233 cosine: 0.753  $\alpha$ : 0.476

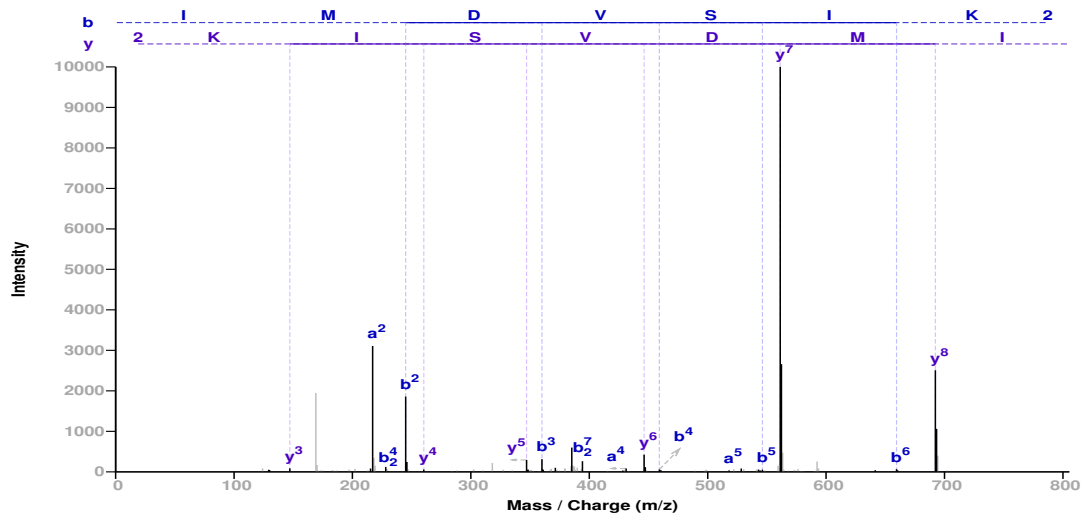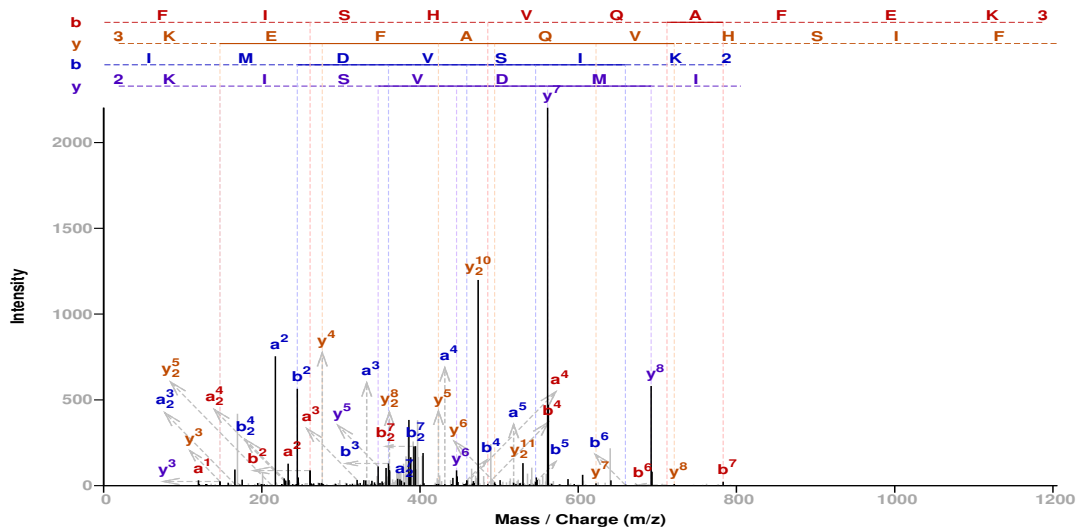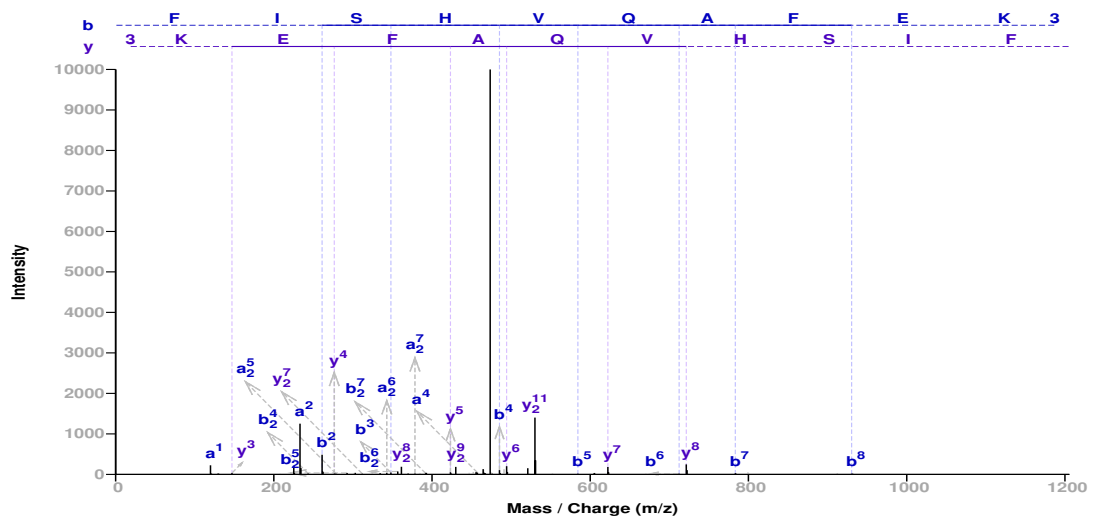

yeast5\_Scan\_Number\_5002 Precursor m/z: 508.296 cosine: 0.846  $\alpha$ : 0.474

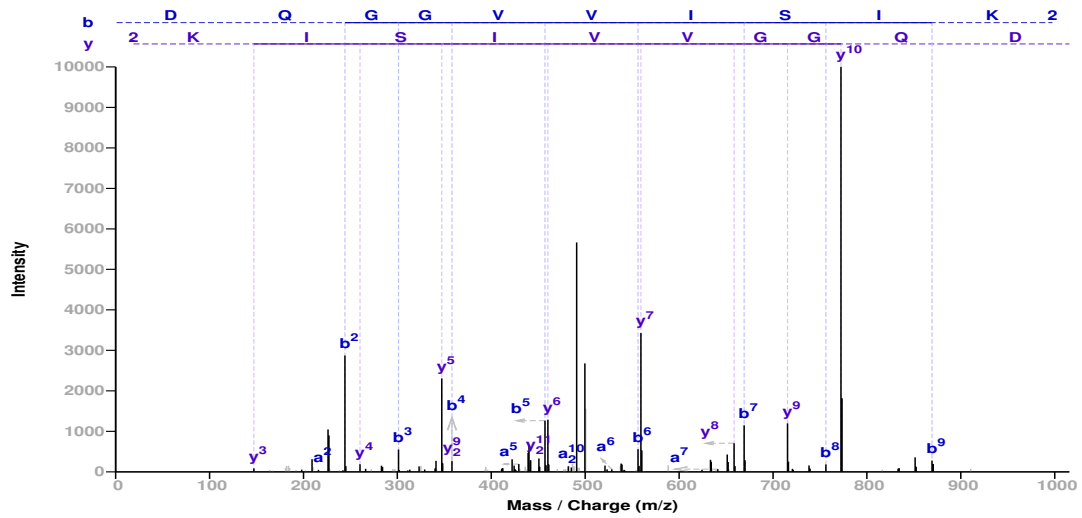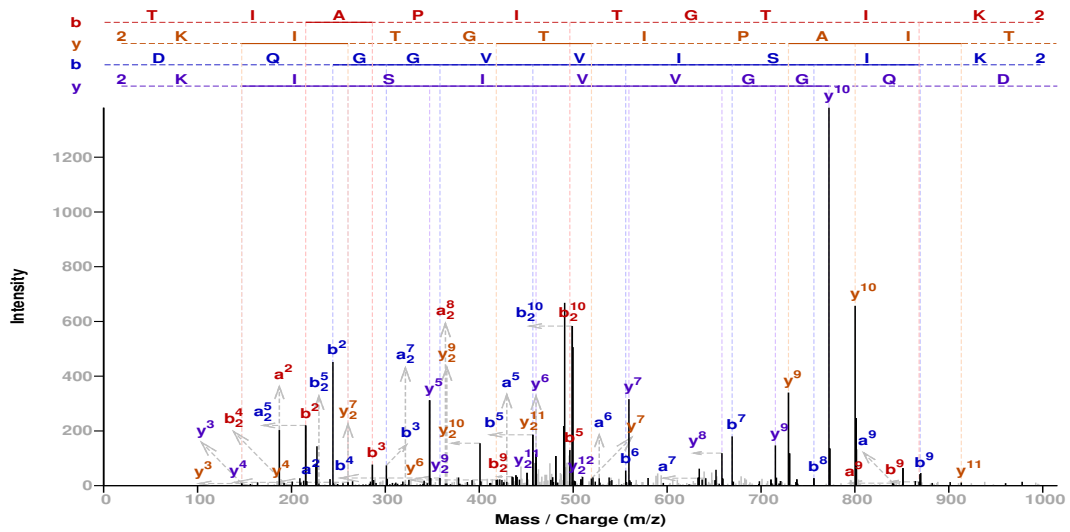





yeast5.Scan\_Number\_1208 Precursor m/z: 442.718 cosine: 0.768  $\alpha$ : 0.463

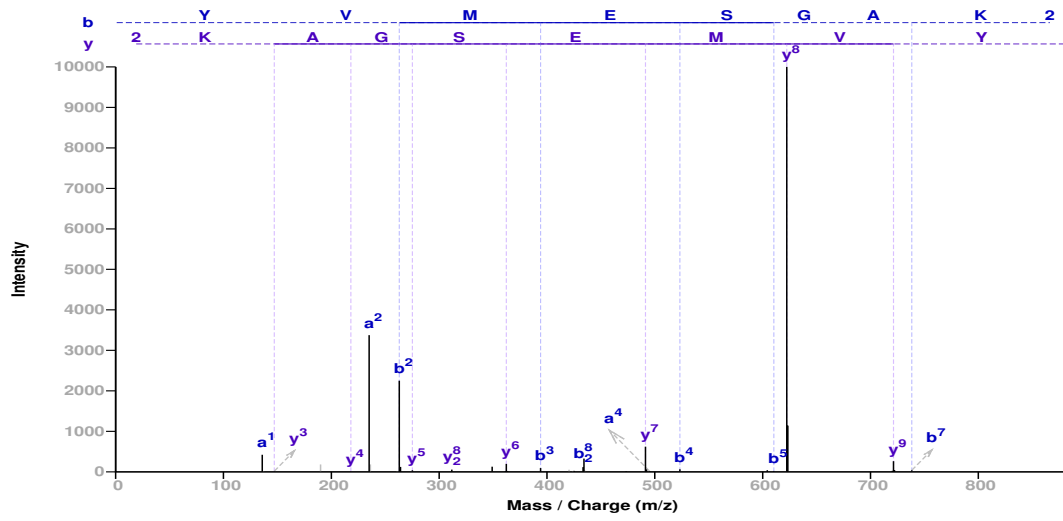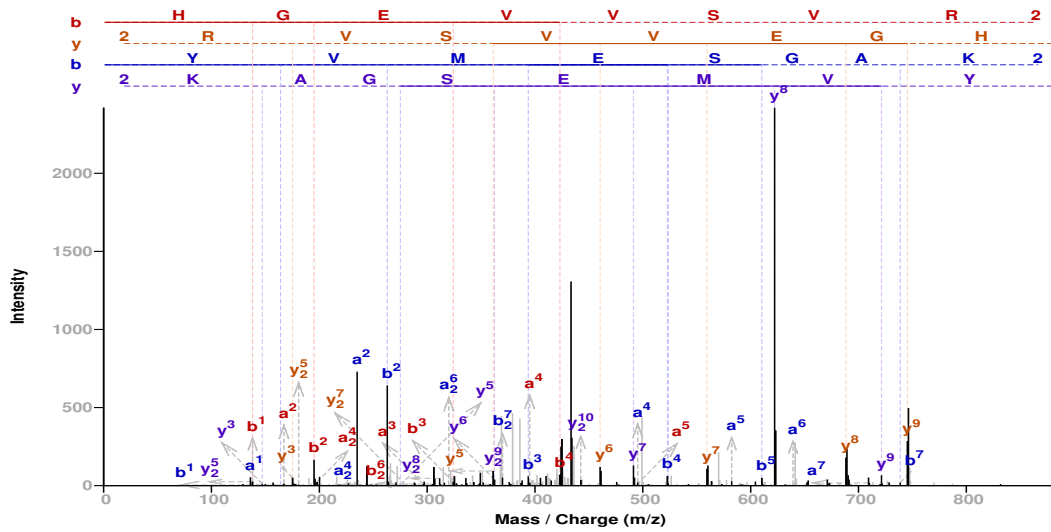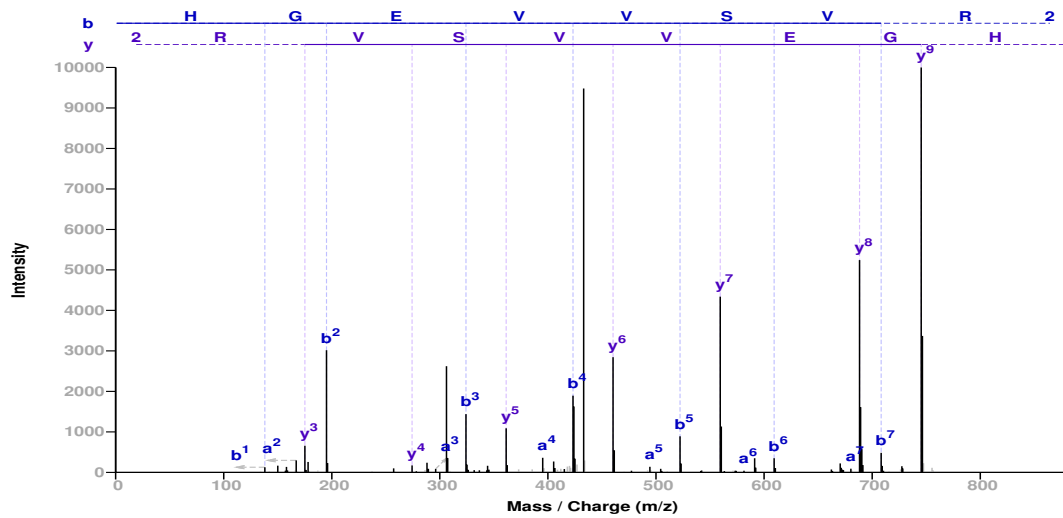



yeast5.Scan\_Number\_2351 Precursor m/z: 519.767 cosine: 0.863  $\alpha$ : 0.451

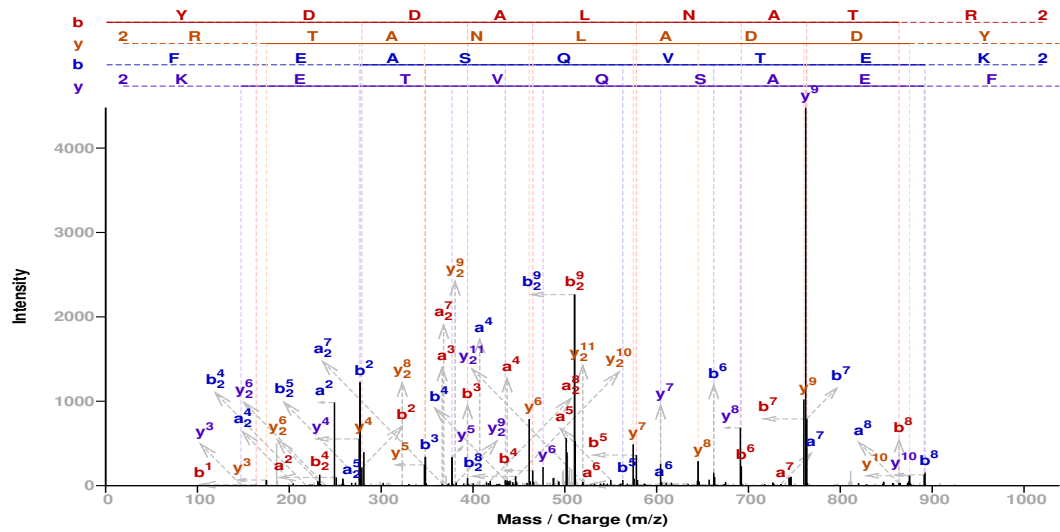

yeast5\_Scan\_Number\_1900 Precursor m/z: 690.338 cosine: 0.830  $\alpha$ : 0.446

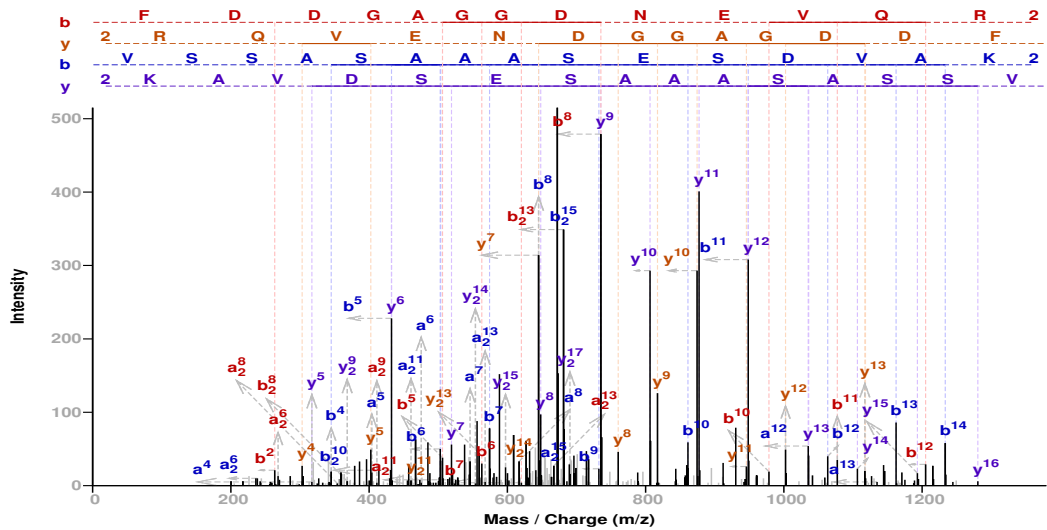

yeast5\_Scan\_Number\_6085 Precursor m/z: 469.280 cosine: 0.745  $\alpha$ : 0.439

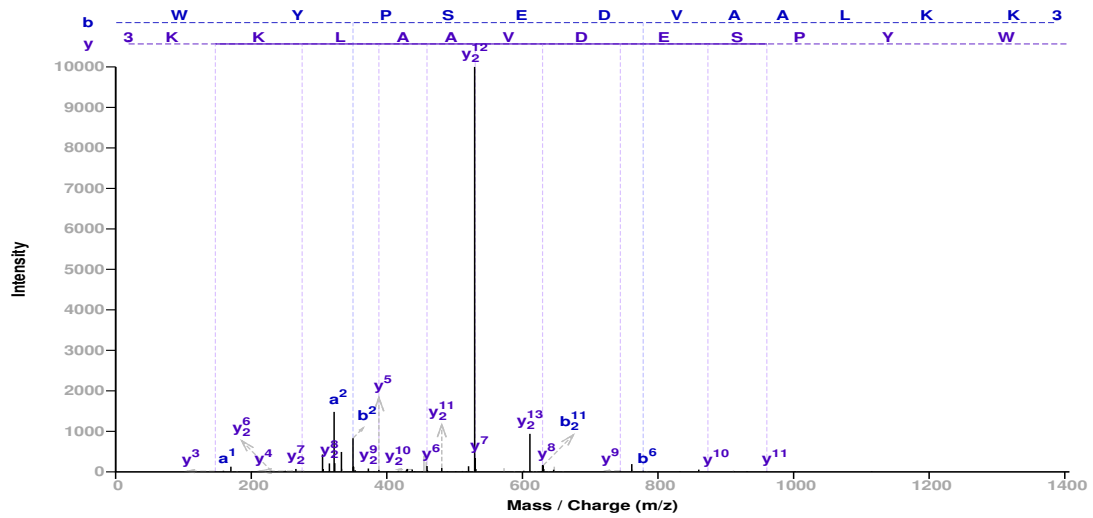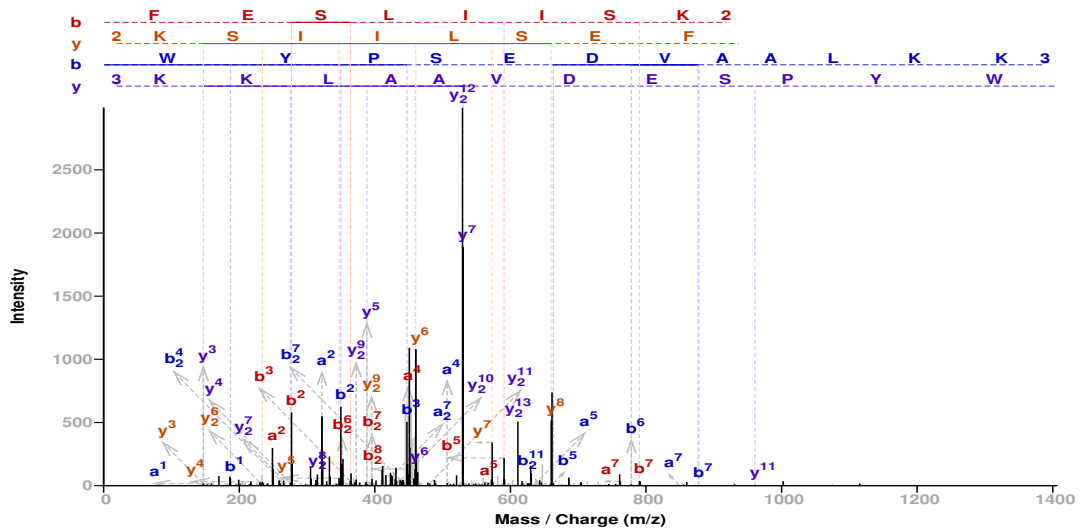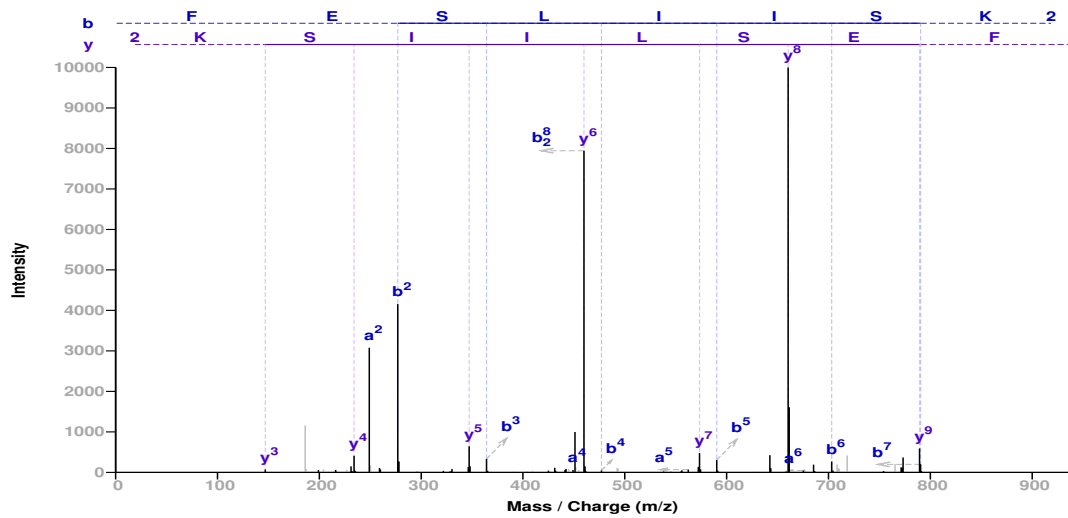

yeast5.Scan\_Number\_4064 Precursor m/z: 472.753 cosine: 0.795  $\alpha$ : 0.437

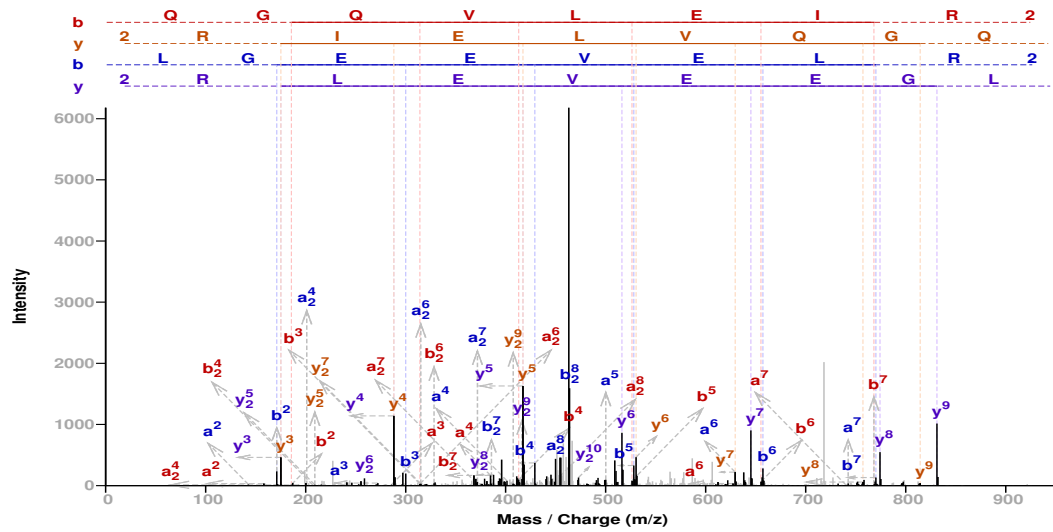

yeast5\_Scan\_Number\_6993 Precursor m/z: 831.426 cosine: 0.721  $\alpha$ : 0.431

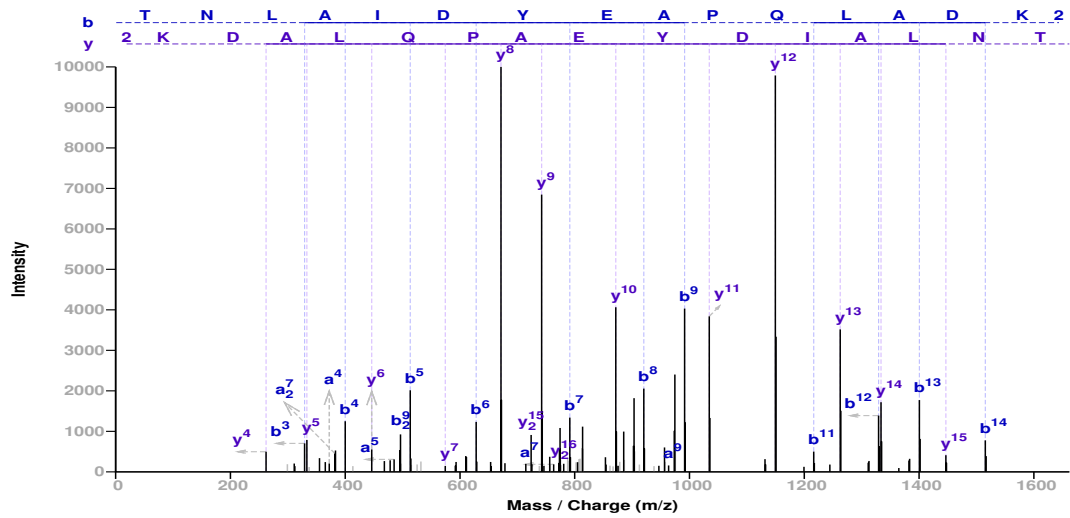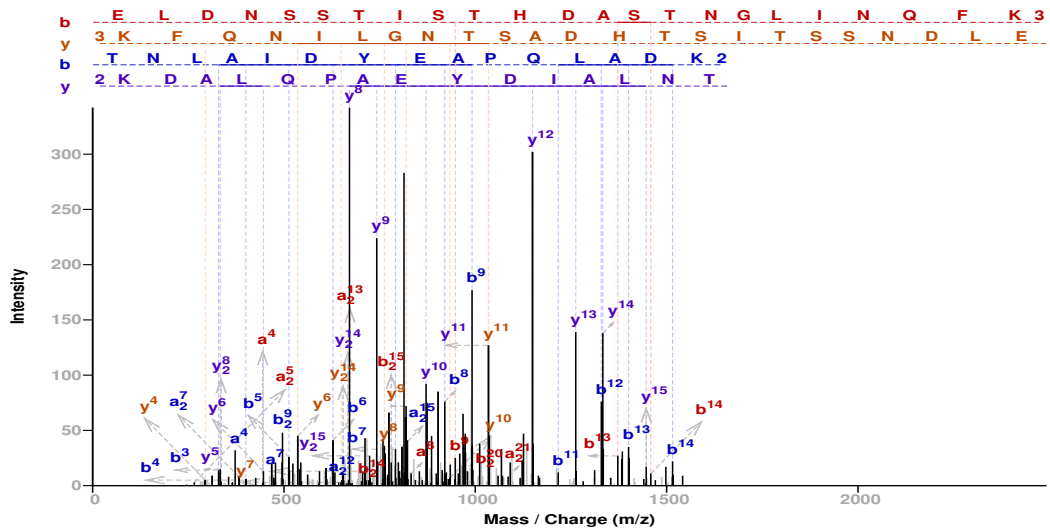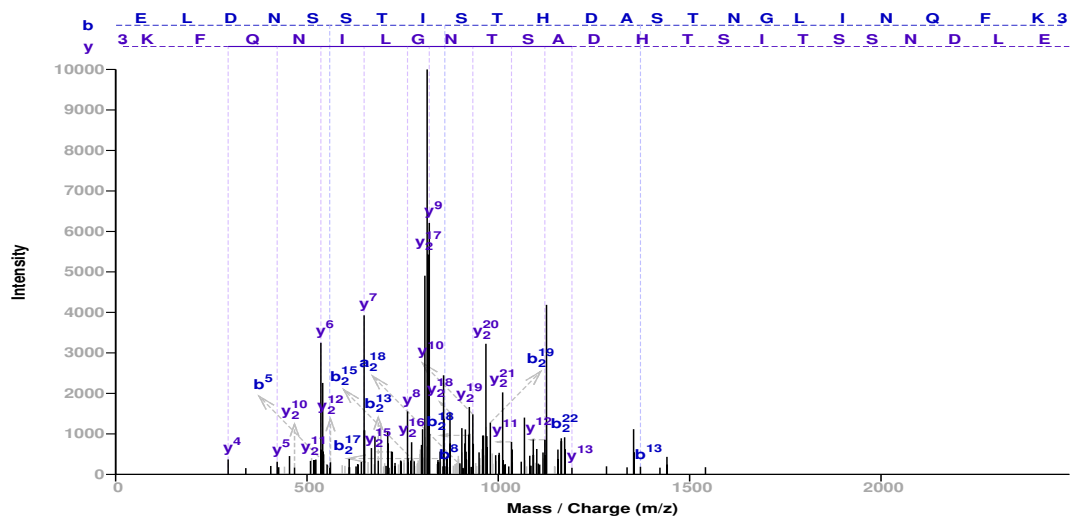

yeast5\_Scan\_Number\_2084 Precursor m/z: 536.809 cosine: 0.752  $\alpha$ : 0.430

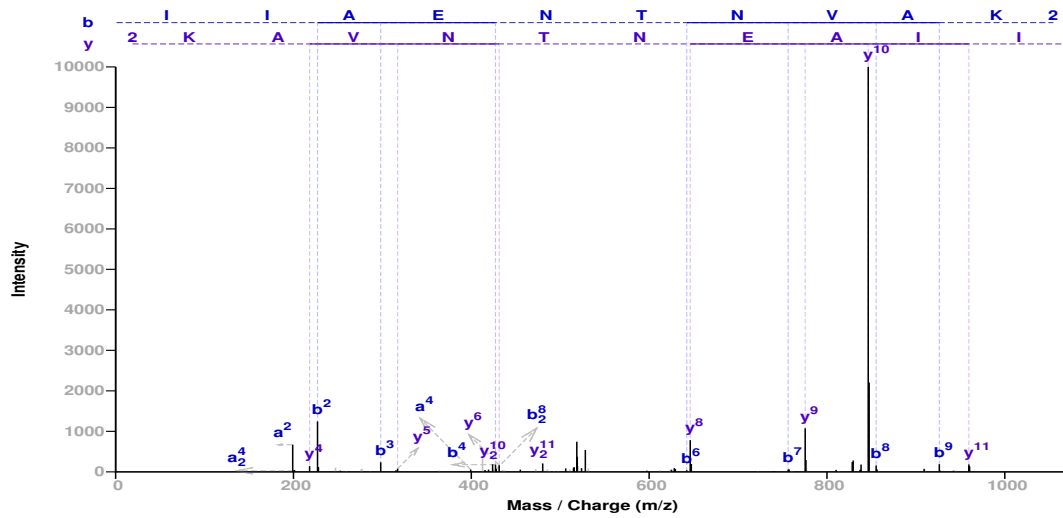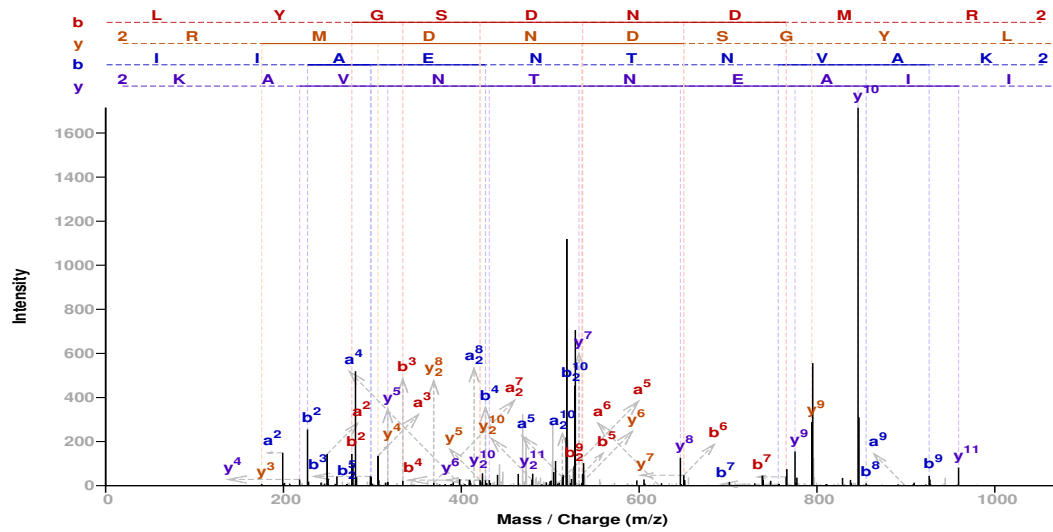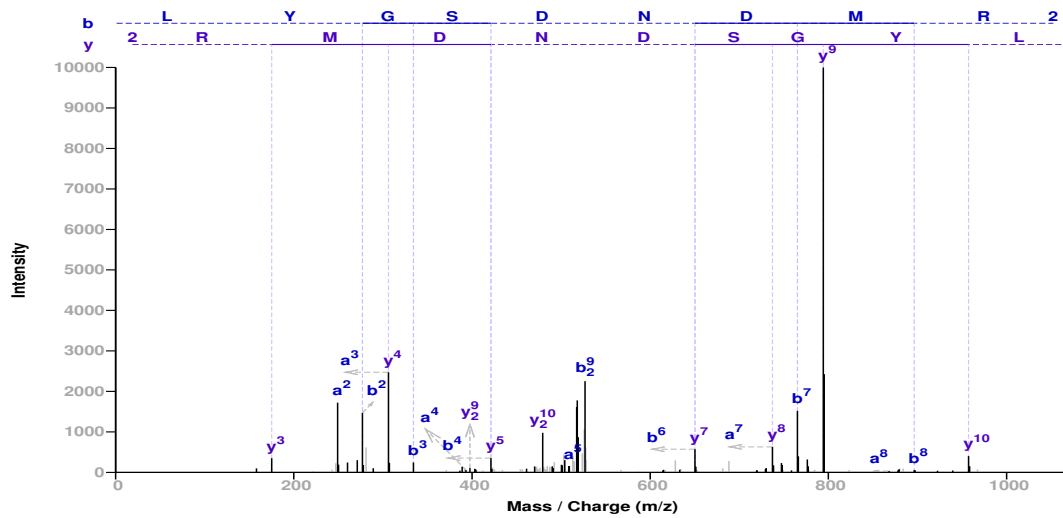

yeast5.Scan\_Number\_4966 Precursor m/z: 457.294 cosine: 0.753  $\alpha$ : 0.429

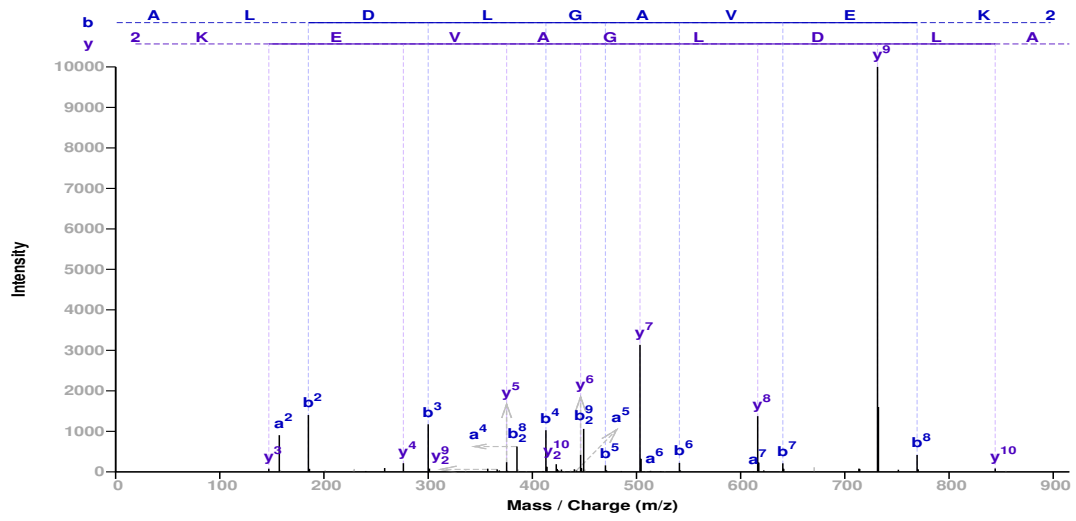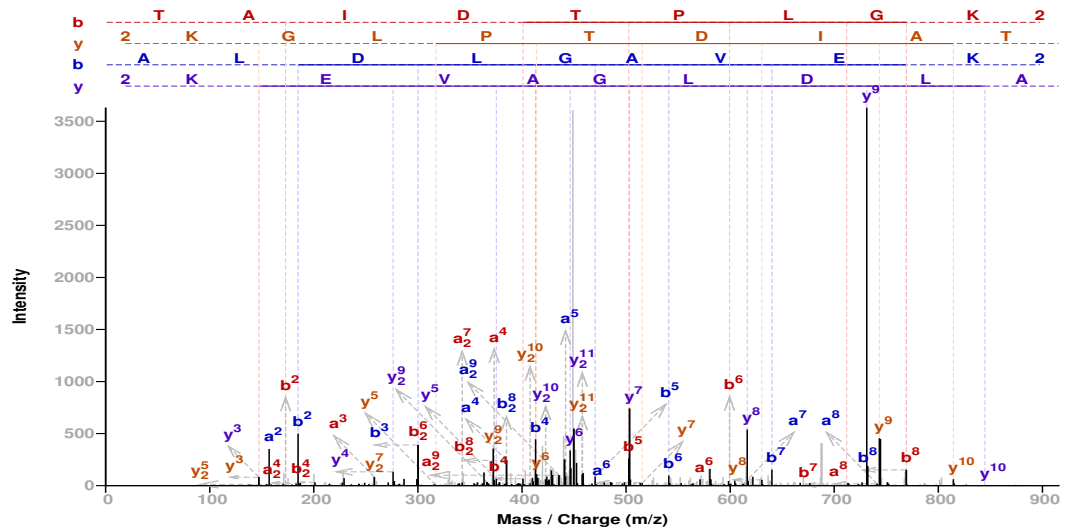

yeast5\_Scan\_Number\_4644 Precursor m/z: 452.577 cosine: 0.872  $\alpha$ : 0.428

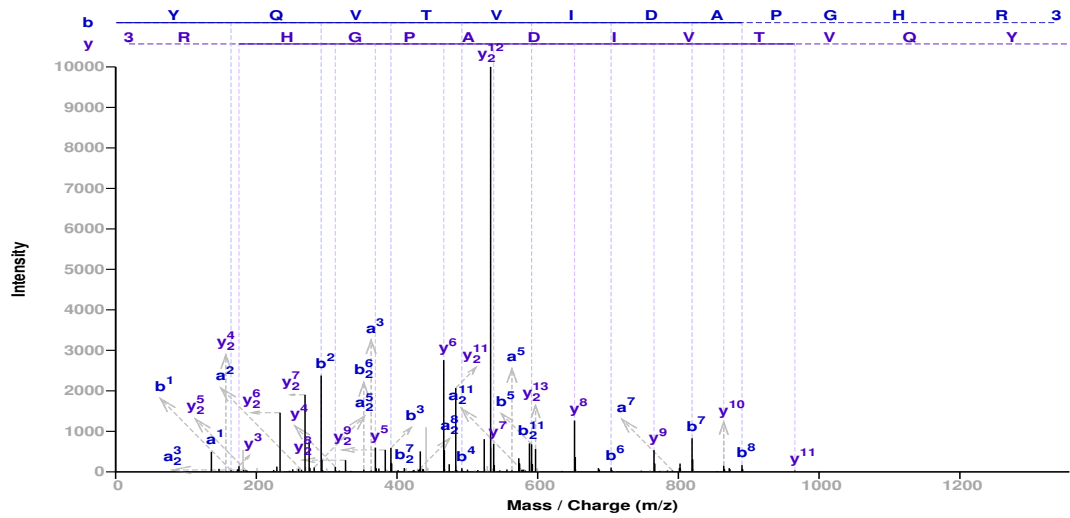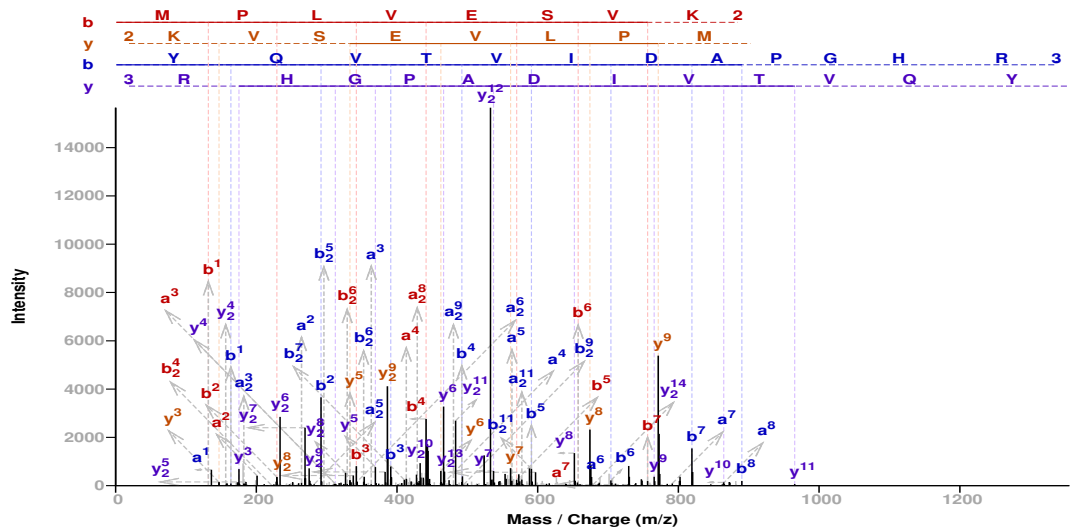



yeast5.Scan\_Number.1649 Precursor m/z: 409.719 cosine: 0.726  $\alpha$ : 0.427

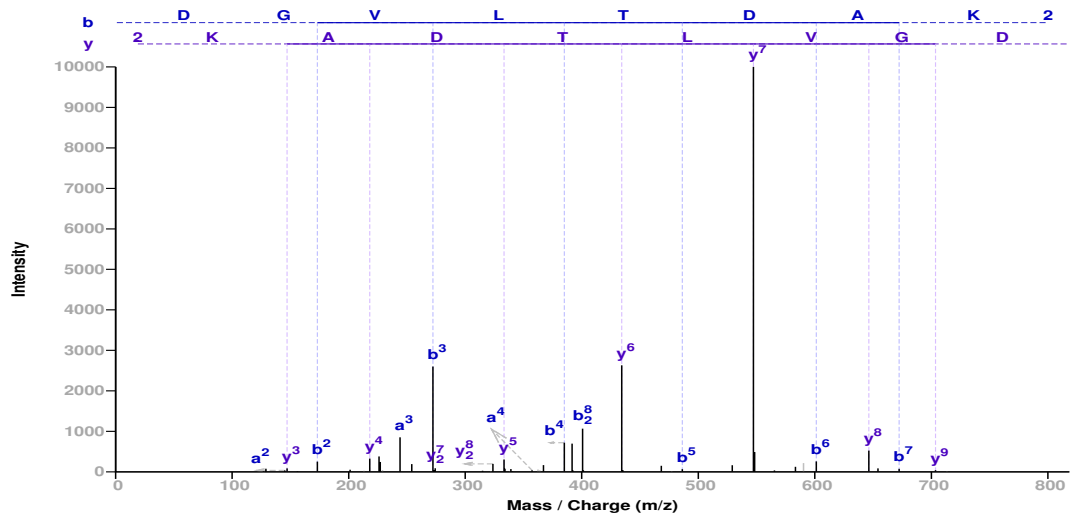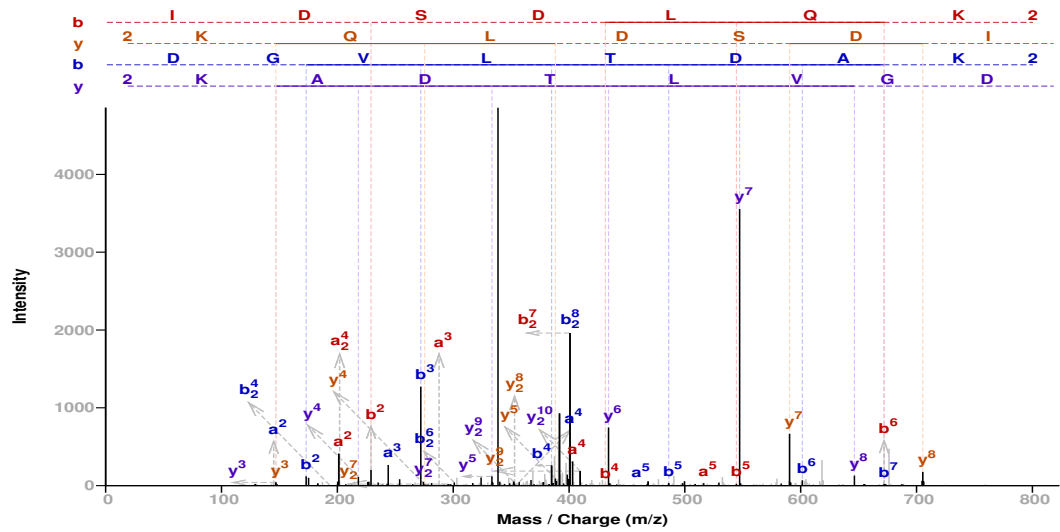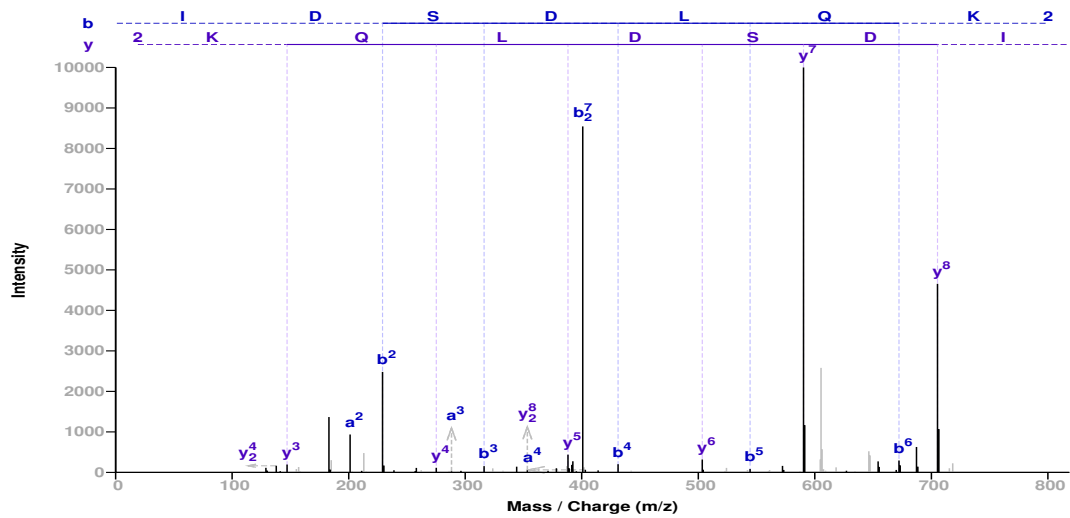

yeast5\_Scan\_Number\_5600 Precursor m/z: 709.351 cosine: 0.729  $\alpha$ : 0.424

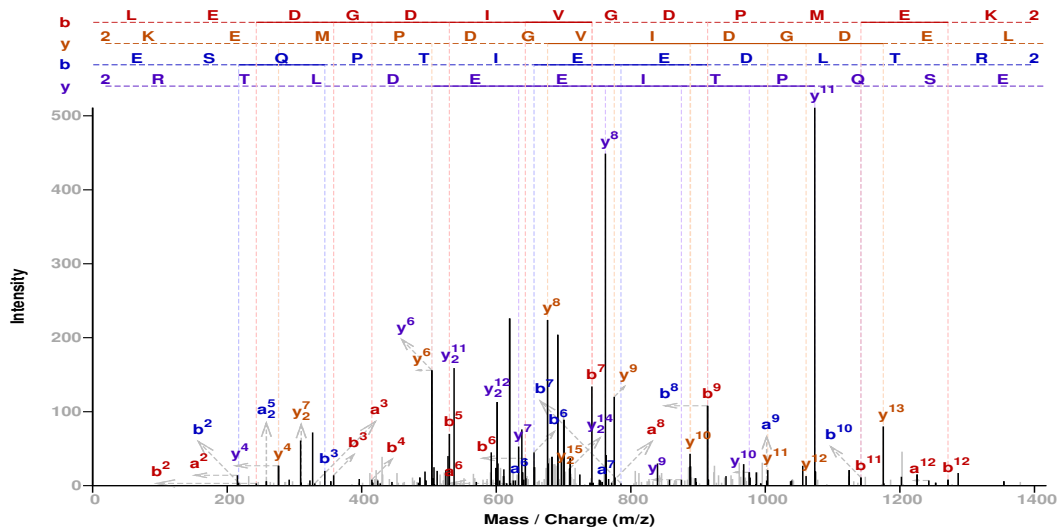

yeast5\_Scan\_Number\_3795 Precursor m/z: 580.277 cosine: 0.768  $\alpha$ : 0.423

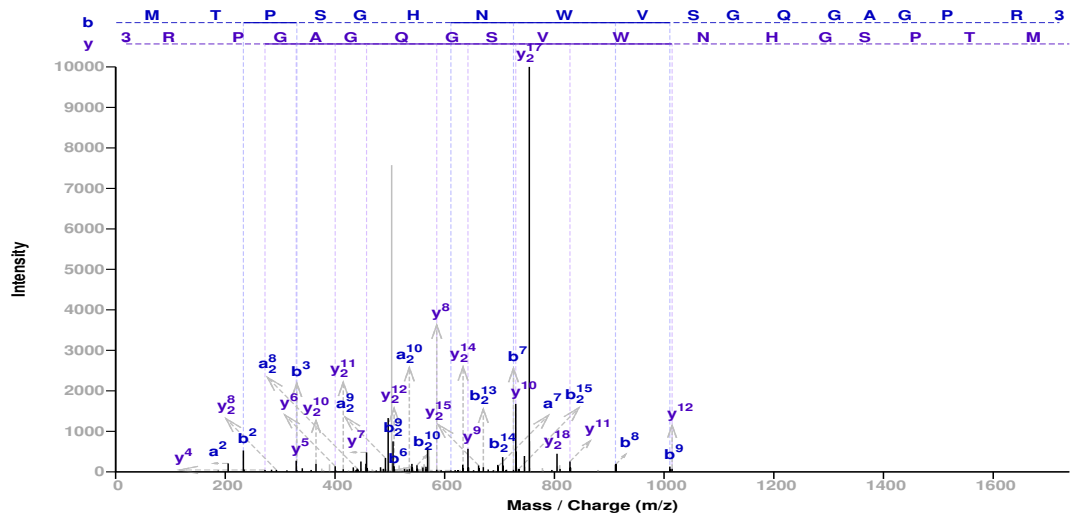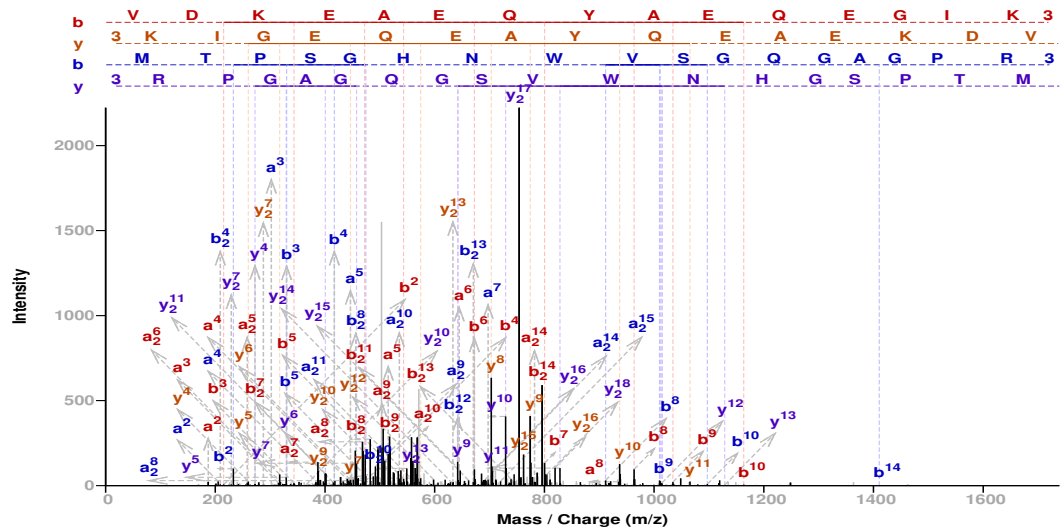

yeast5\_Scan\_Number\_3097 Precursor m/z: 352.214 cosine: 0.940  $\alpha$ : 0.422

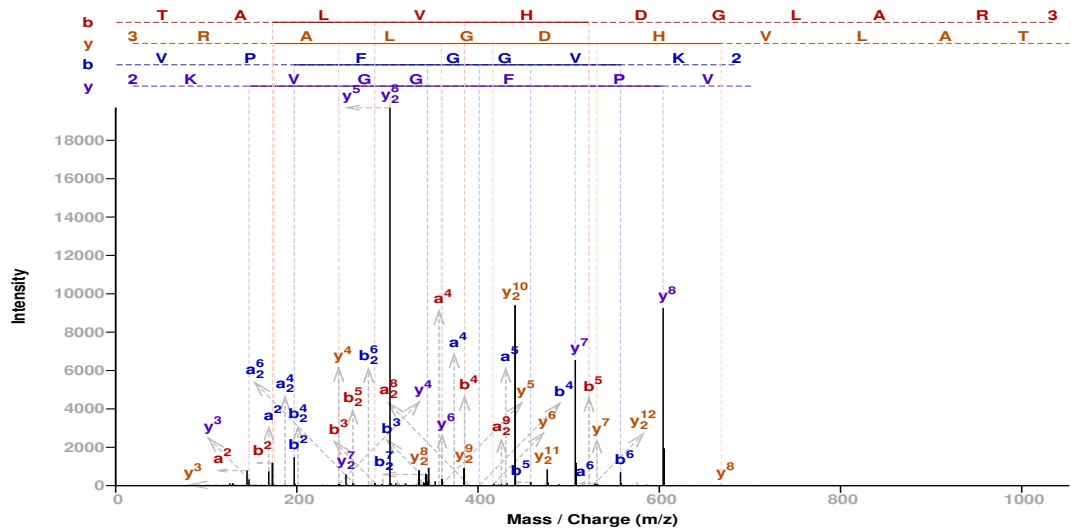

yeast5\_Scan\_Number\_5688 Precursor m/z: 796.406 cosine: 0.768  $\alpha$ : 0.421

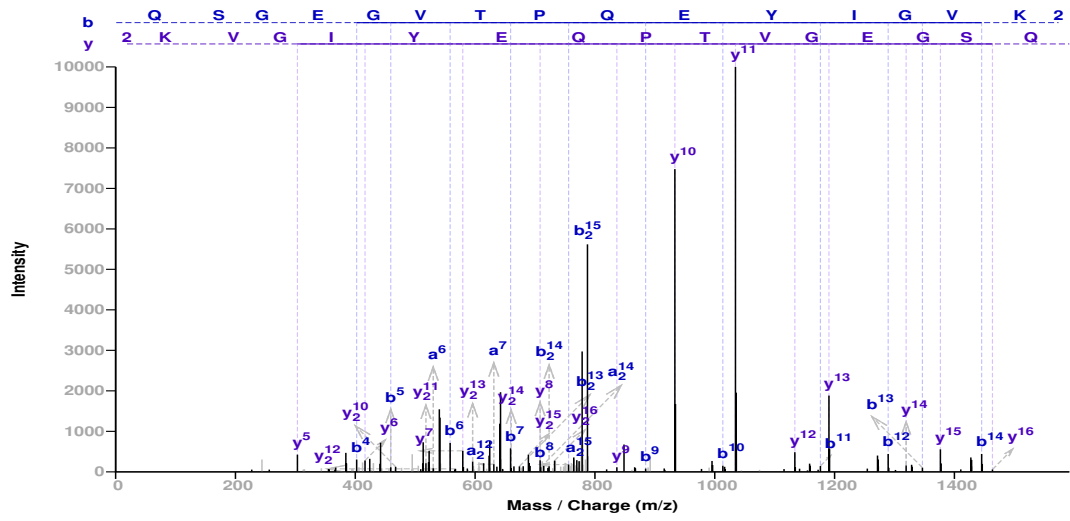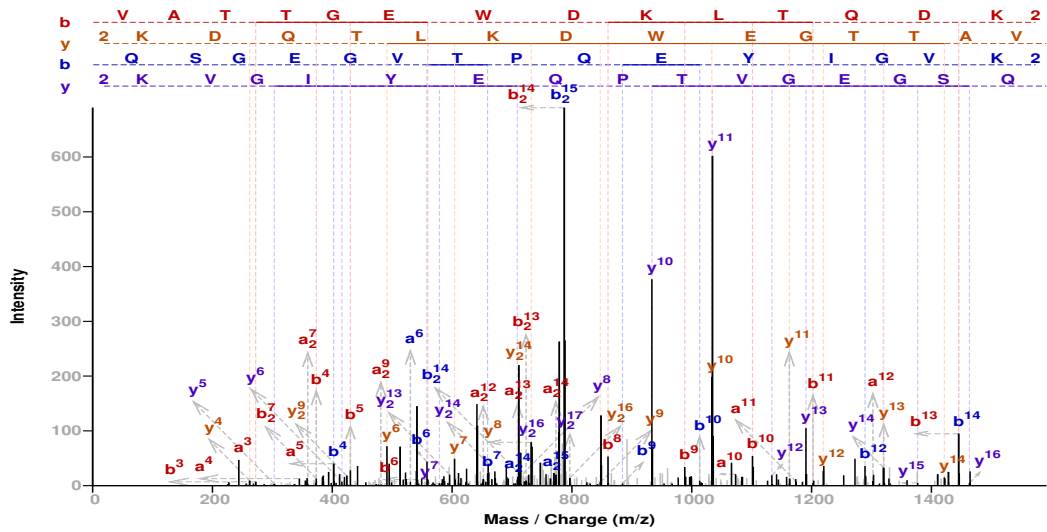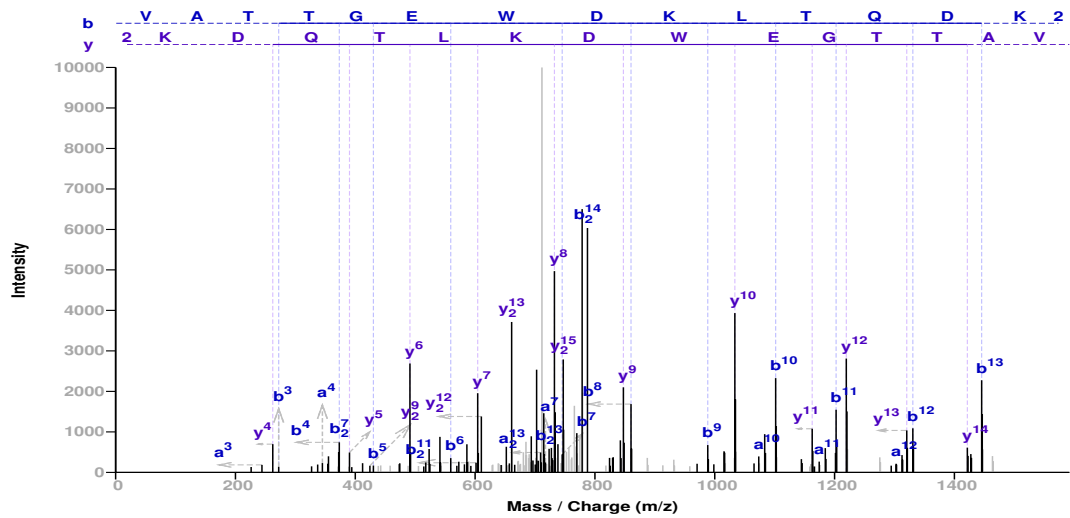

yeast5\_Scan\_Number\_5834 Precursor m/z: 468.594 cosine: 0.761  $\alpha$ : 0.417

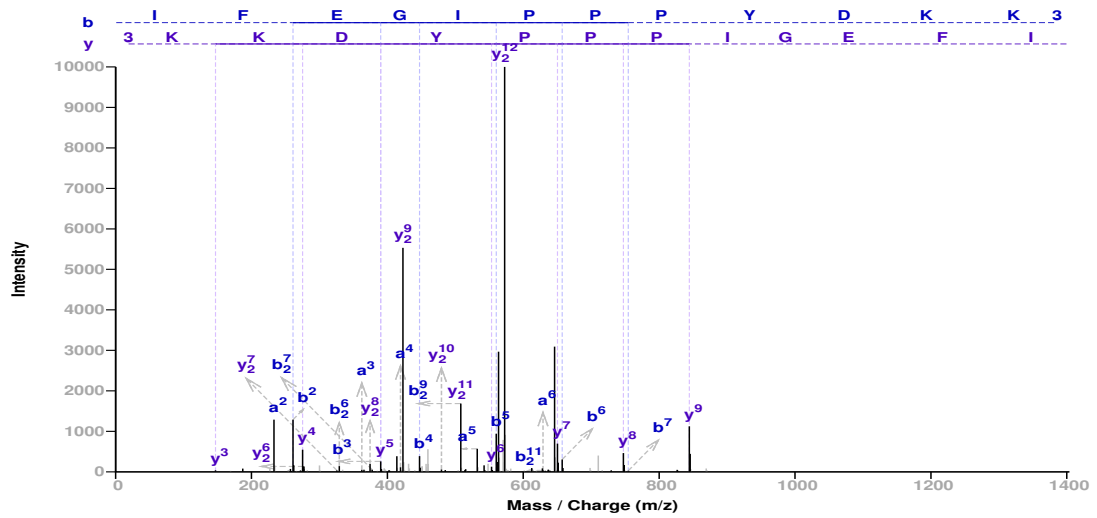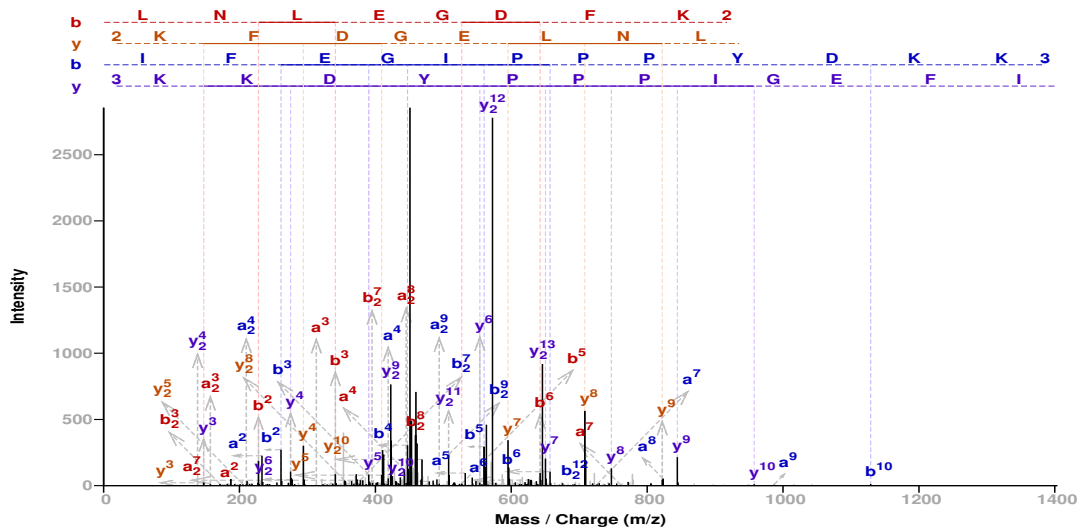

yeast5\_Scan\_Number\_5245 Precursor m/z: 590.341 cosine: 0.744  $\alpha$ : 0.412

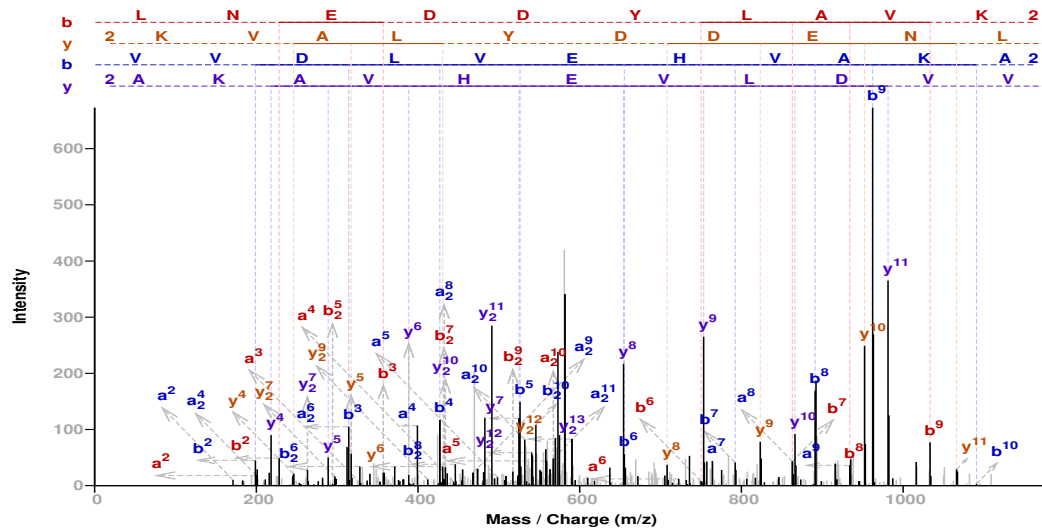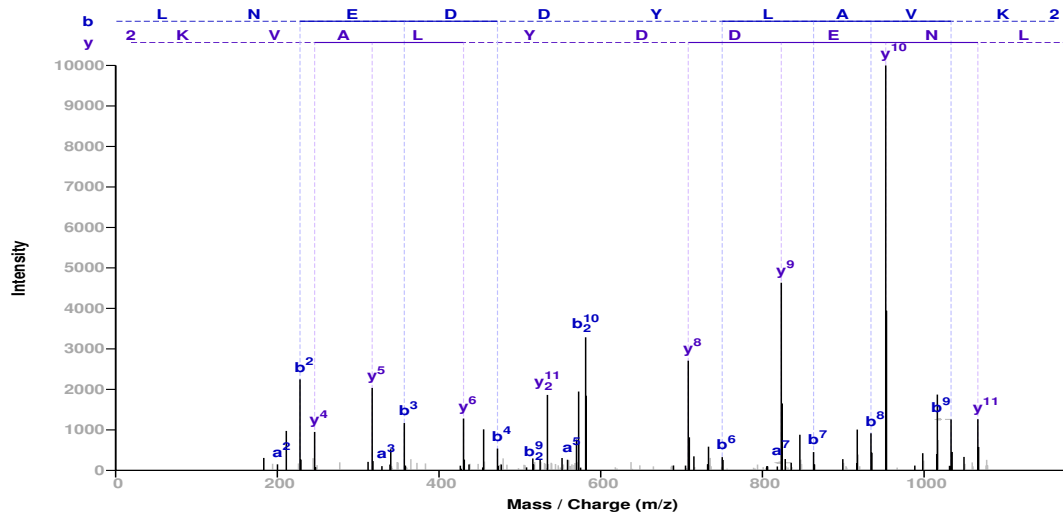

yeast5\_Scan\_Number\_4228 Precursor m/z: 560.313 cosine: 0.729  $\alpha$ : 0.411

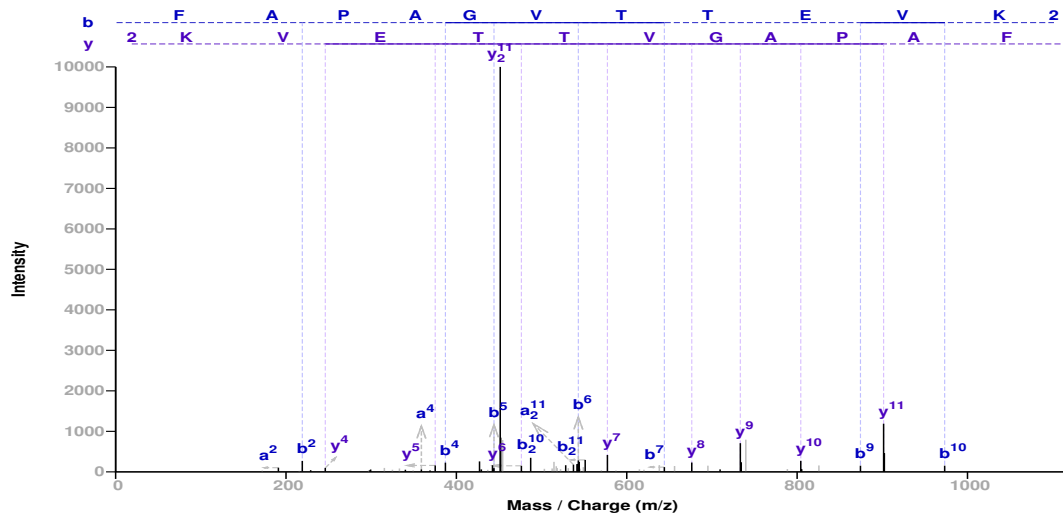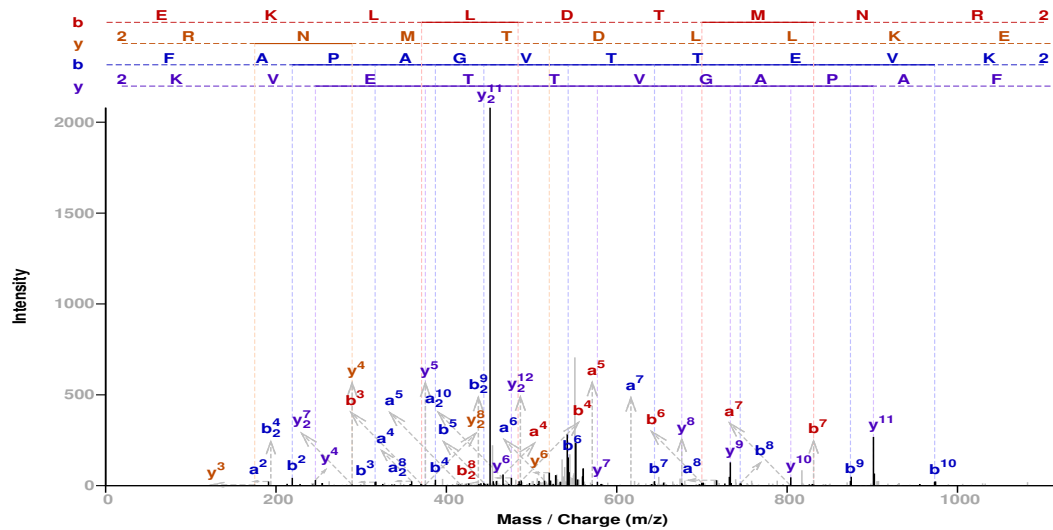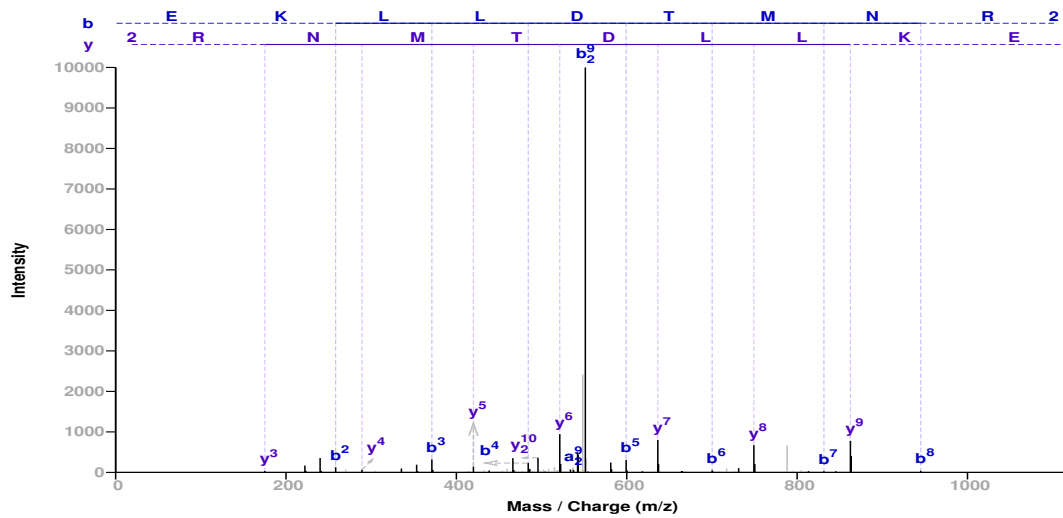



yeast5\_Scan\_Number\_4279 Precursor m/z: 441.532 cosine: 0.762  $\alpha$ : 0.406

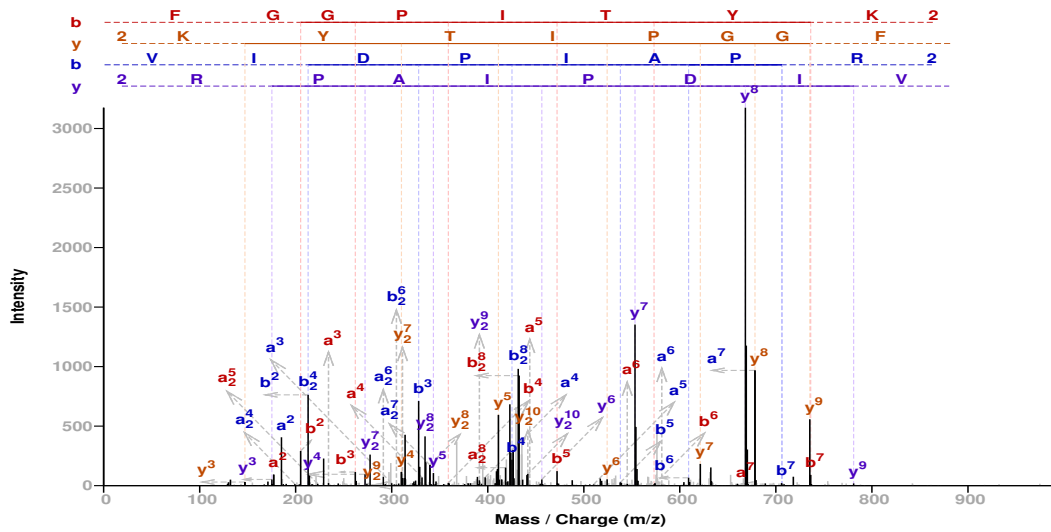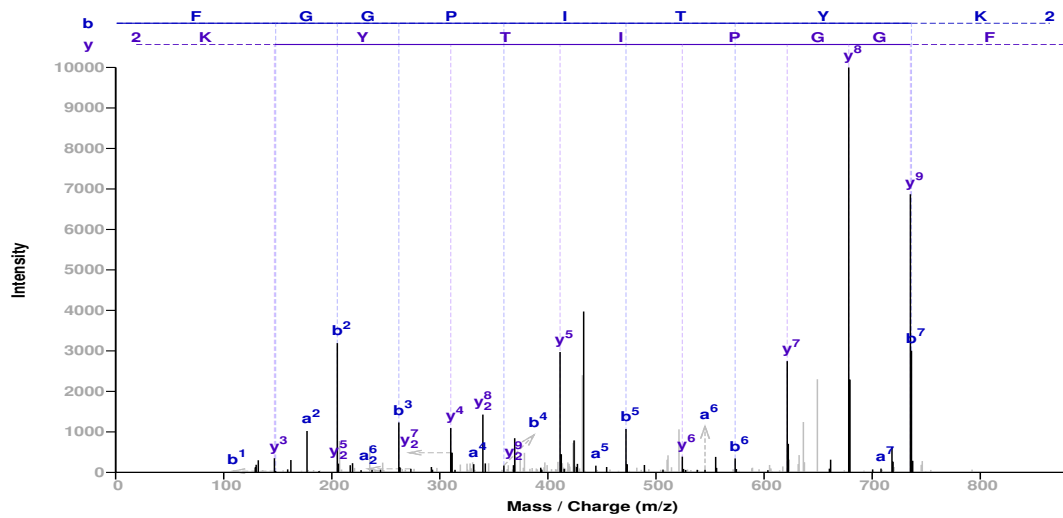

yeast5\_Scan\_Number\_8842 Precursor m/z: 737.347 cosine: 0.743  $\alpha$ : 0.405

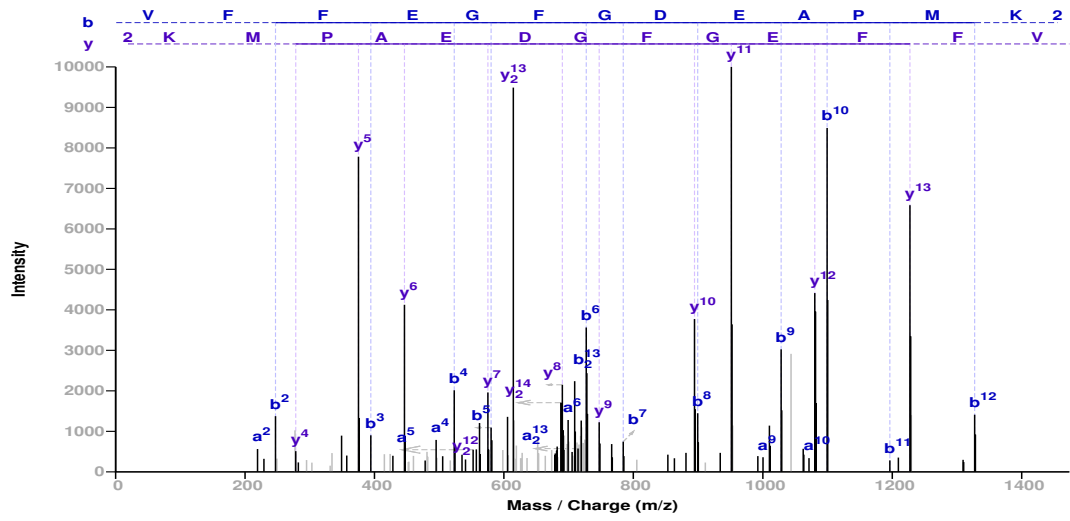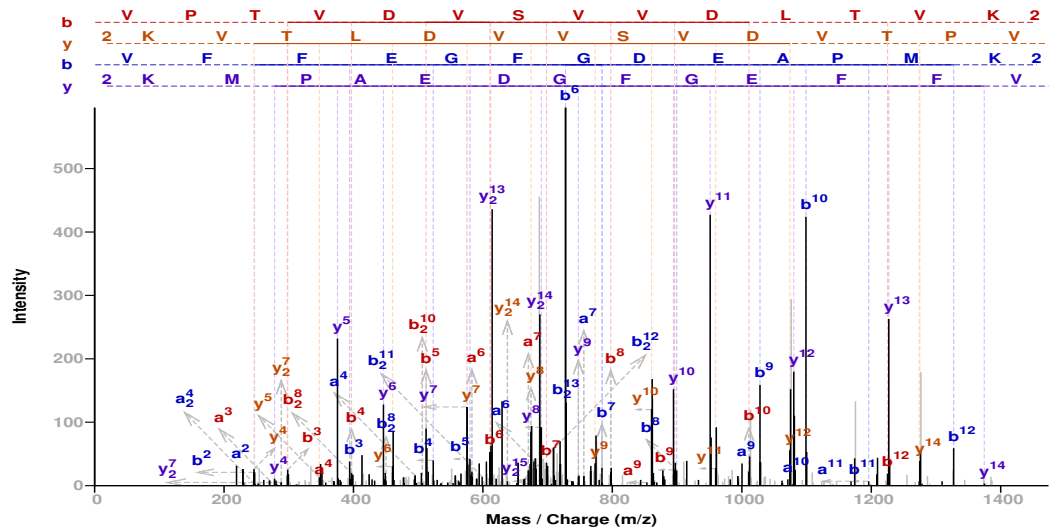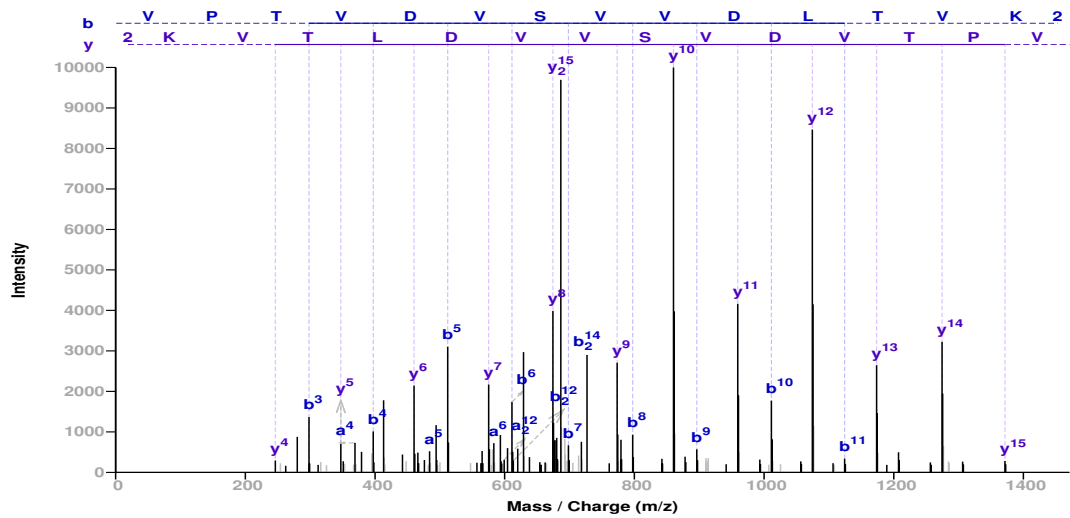

yeast5.Scan\_Number\_2322 Precursor m/z: 409.738 cosine: 0.755  $\alpha$ : 0.404

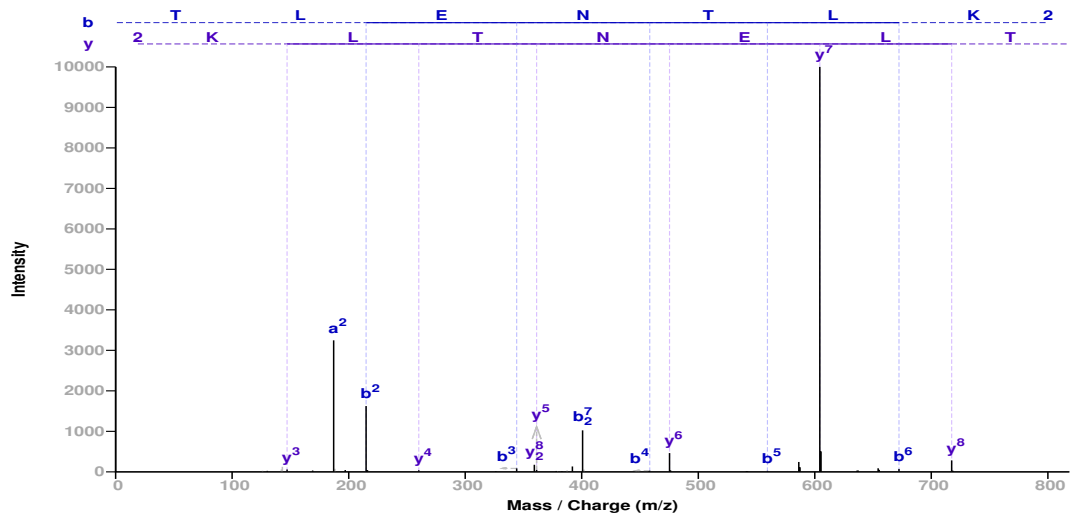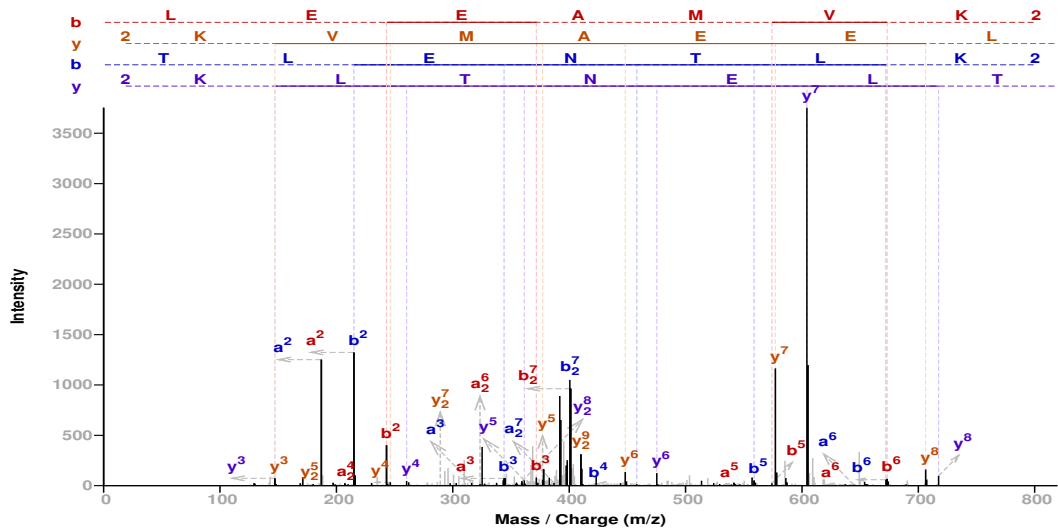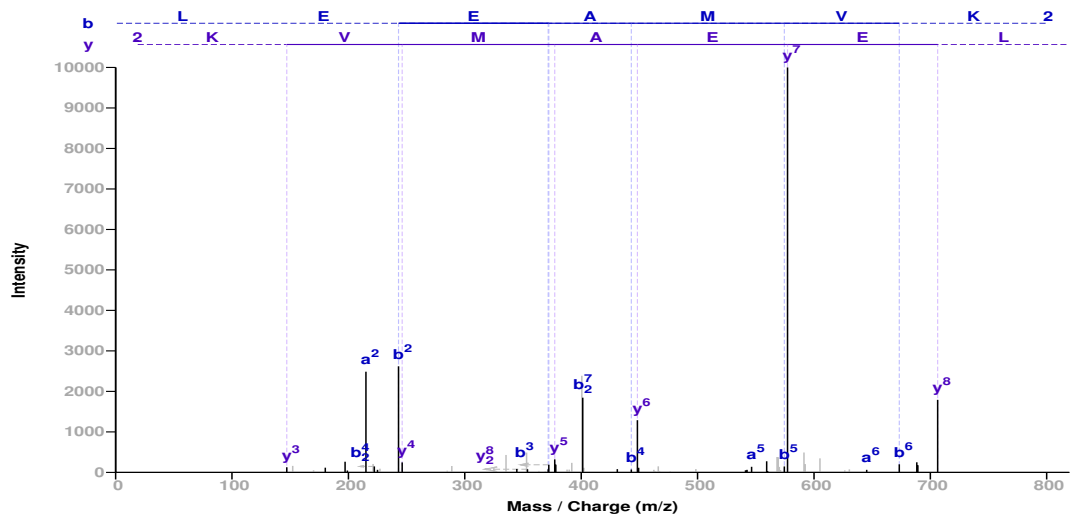

yeast5.Scan\_Number.1226 Precursor m/z: 498.251 cosine: 0.790  $\alpha$ : 0.399

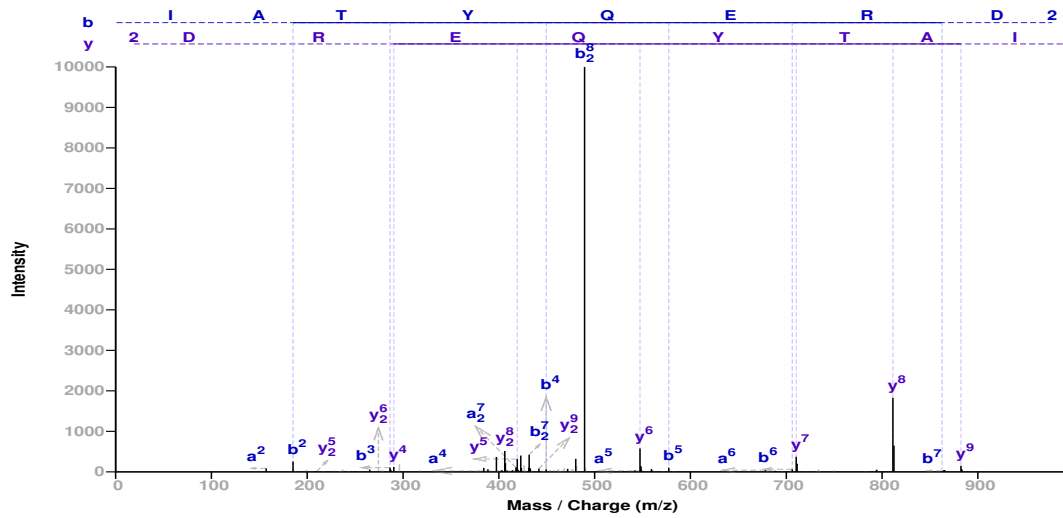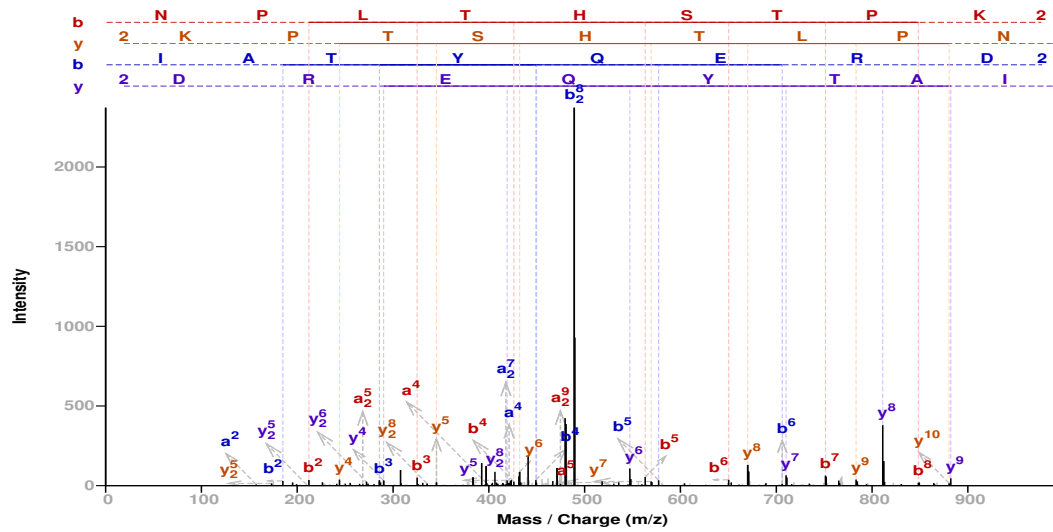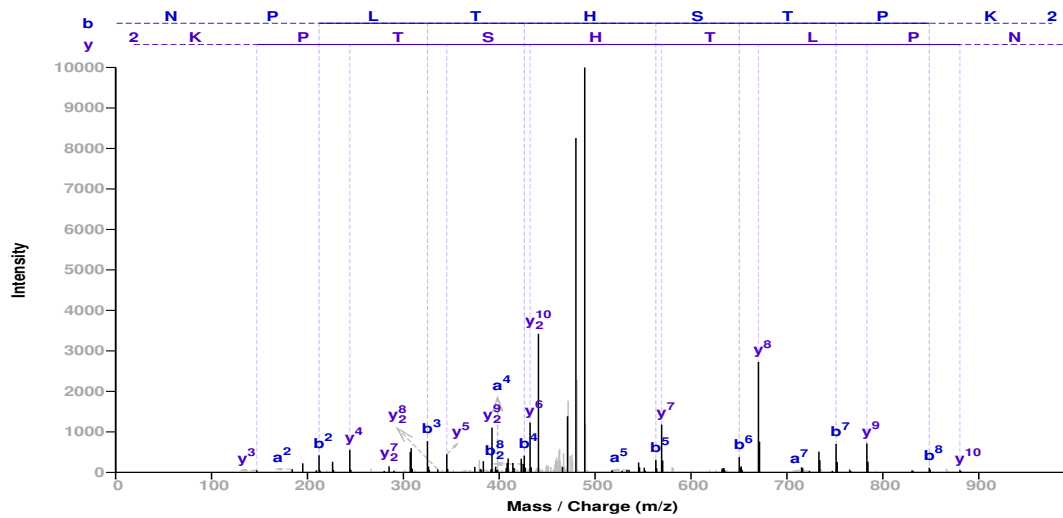

yeast5\_Scan\_Number\_6588 Precursor m/z: 730.876 cosine: 0.848  $\alpha$ : 0.396

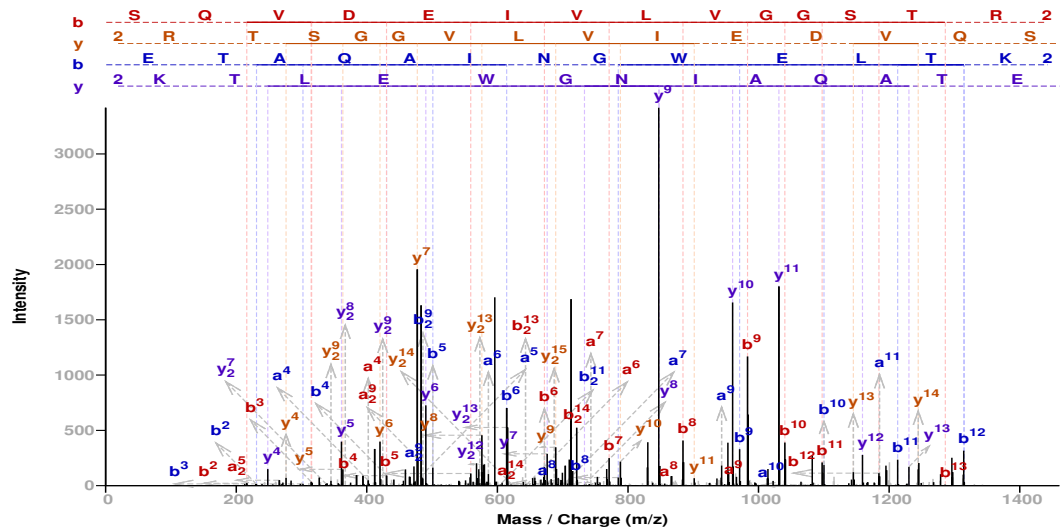

yeast5\_Scan\_Number\_6500 Precursor m/z: 529.788 cosine: 0.839  $\alpha$ : 0.395

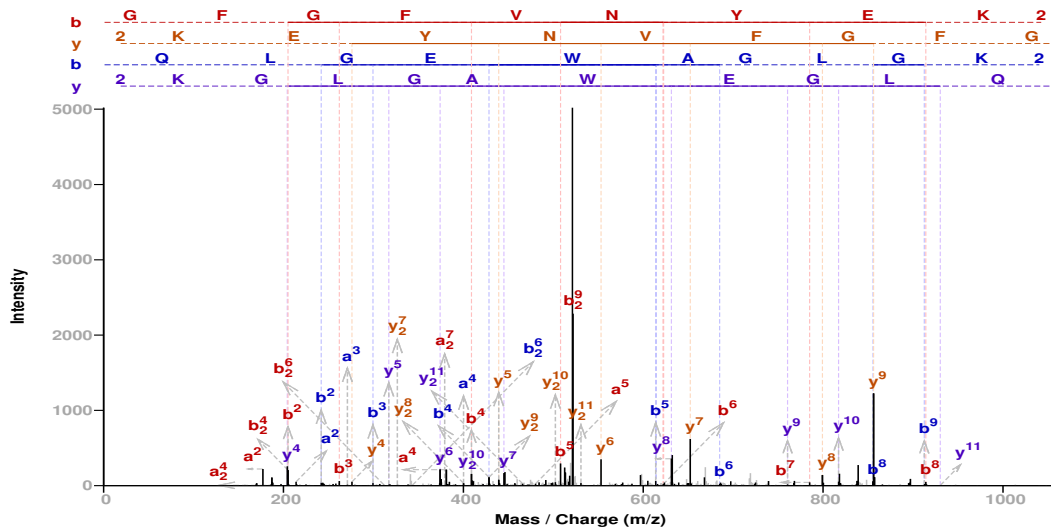

yeast5\_Scan\_Number\_6933 Precursor m/z: 554.305 cosine: 0.750  $\alpha$ : 0.381

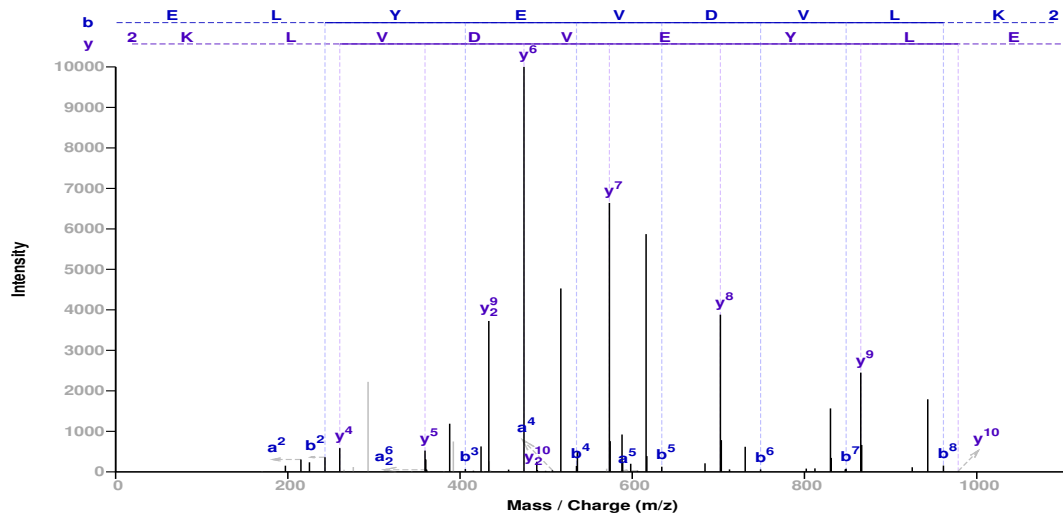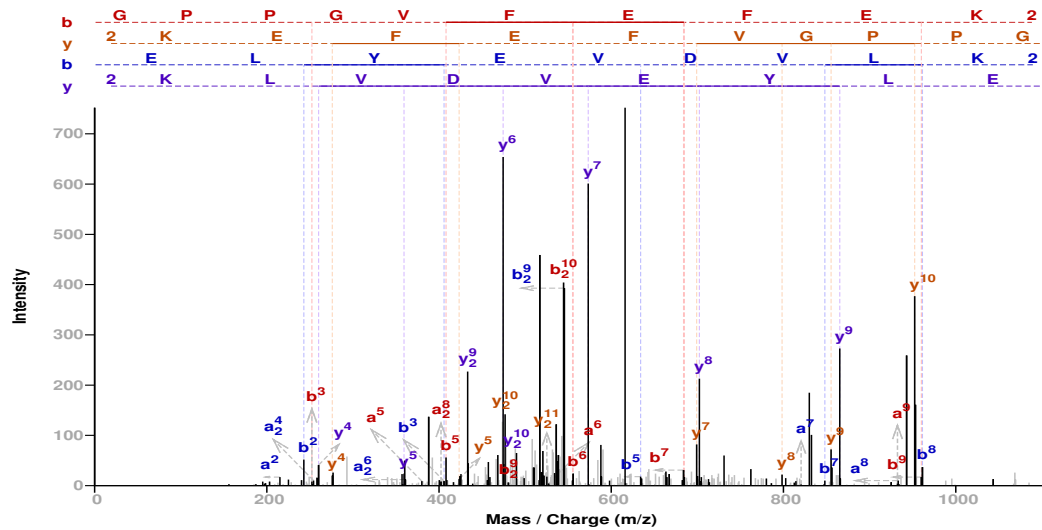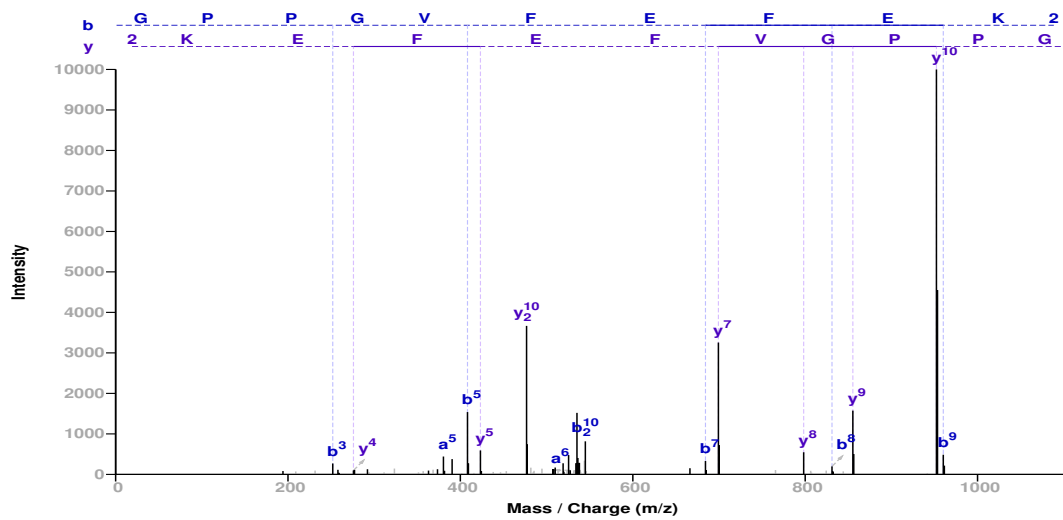

yeast5\_Scan\_Number\_4392 Precursor m/z: 574.789 cosine: 0.770  $\alpha$ : 0.381

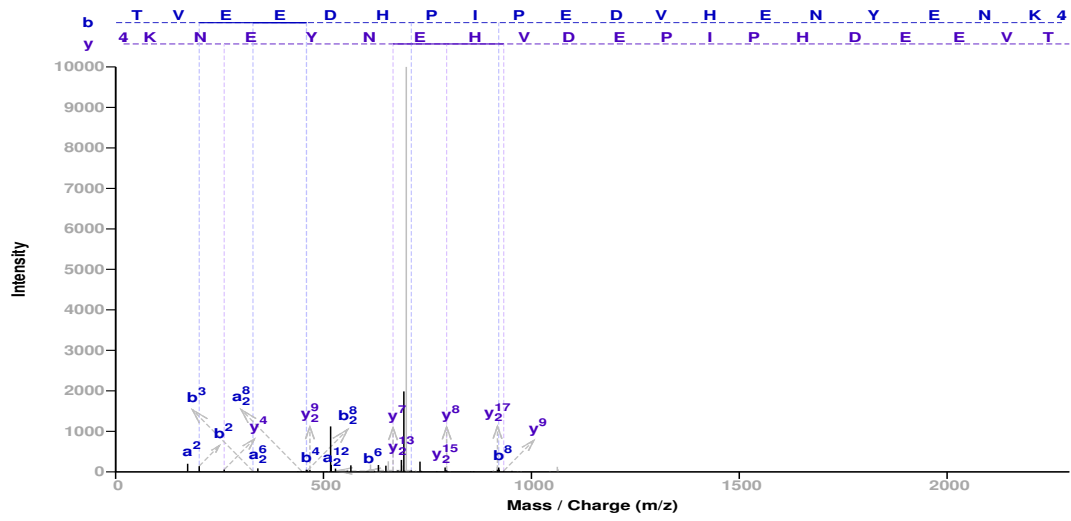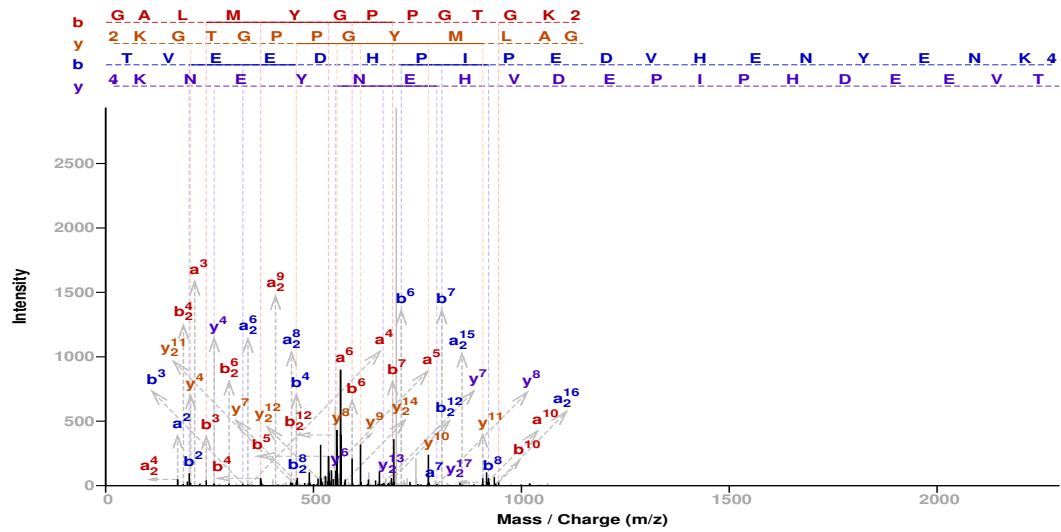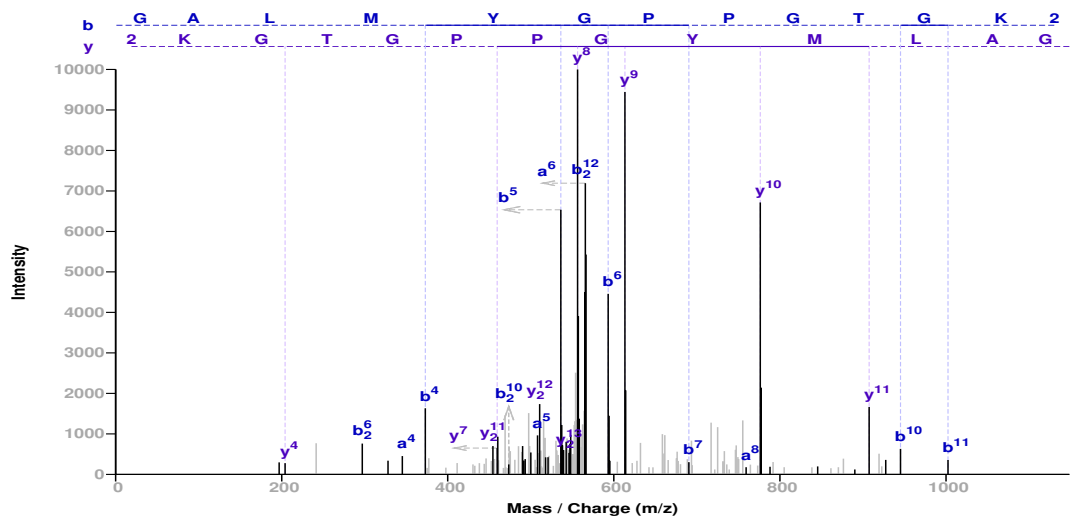





yeast5\_Scan\_Number\_3687 Precursor m/z: 658.324 cosine: 0.752  $\alpha$ : 0.367

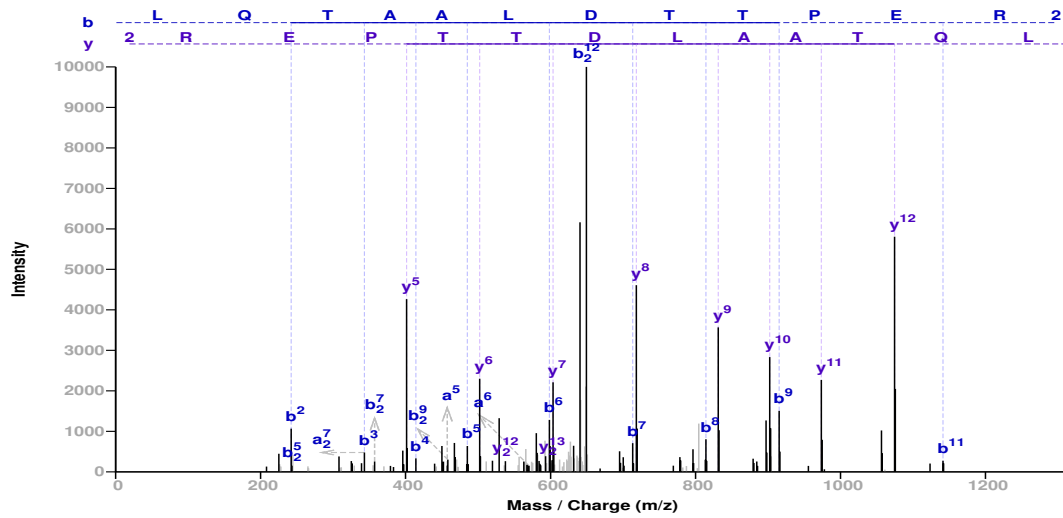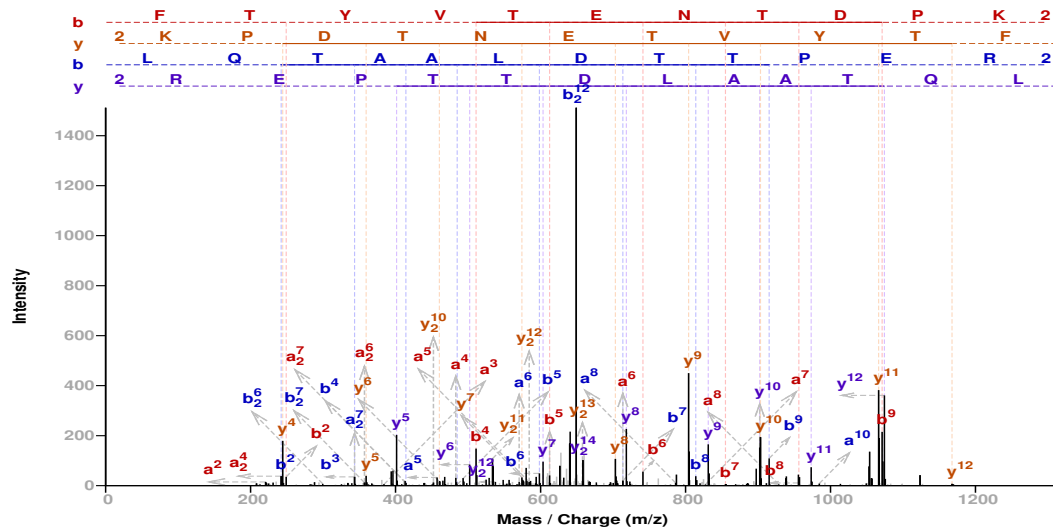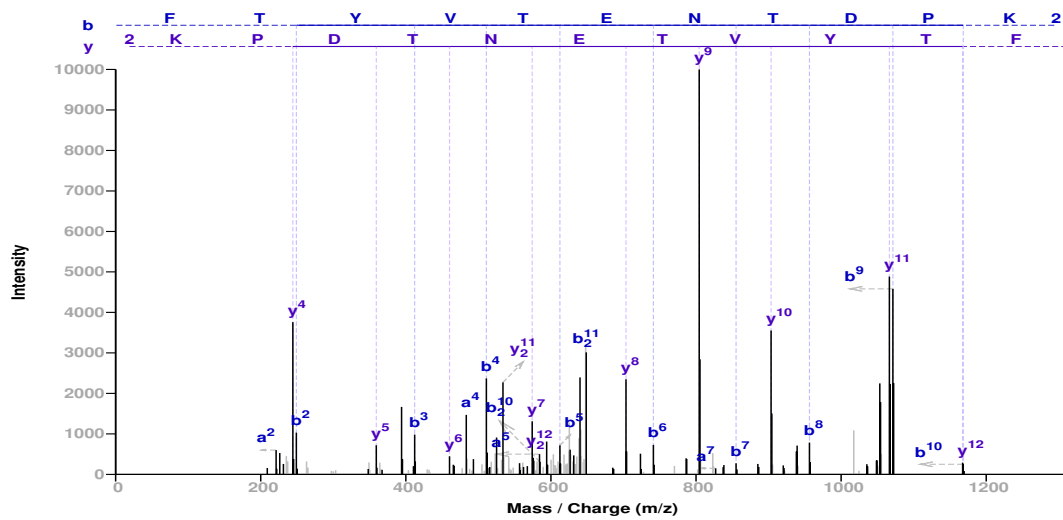

yeast5.Scan\_Number\_2610 Precursor m/z: 429.754 cosine: 0.768  $\alpha$ : 0.366

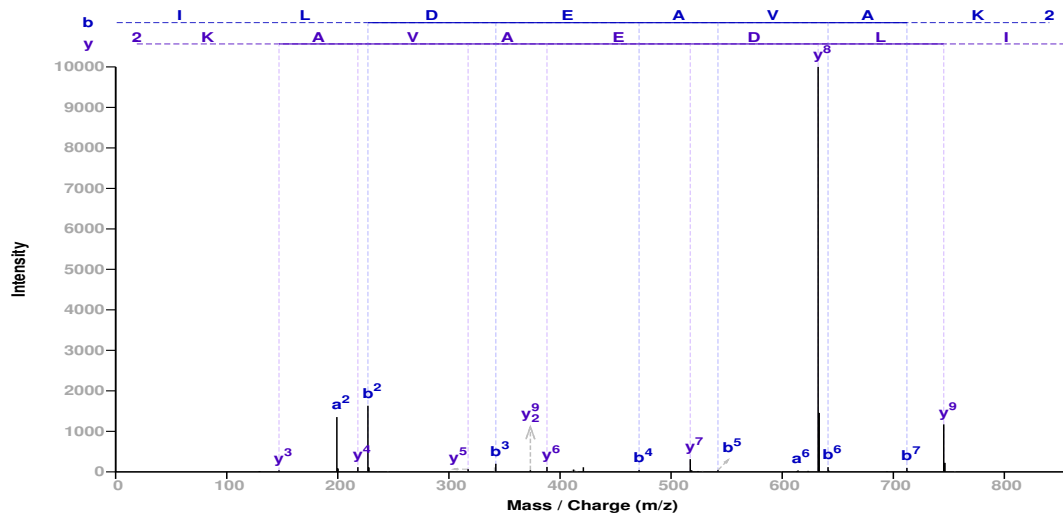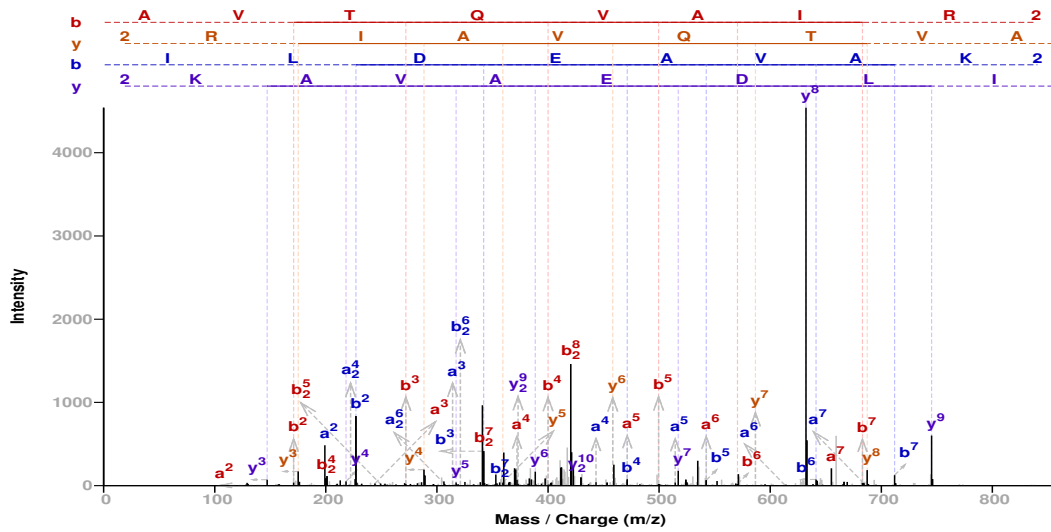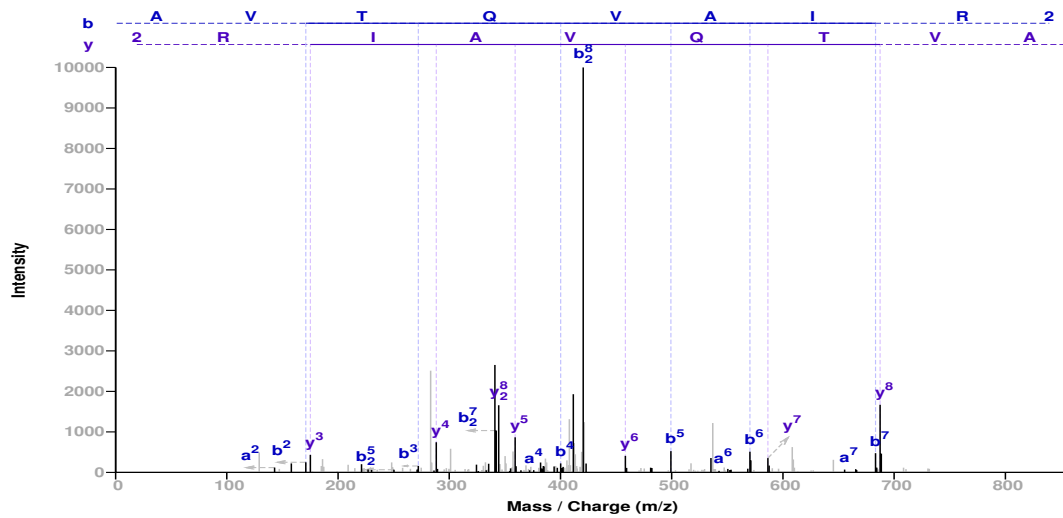

yeast5\_Scan\_Number\_6998 Precursor m/z: 684.394 cosine: 0.807  $\alpha$ : 0.363

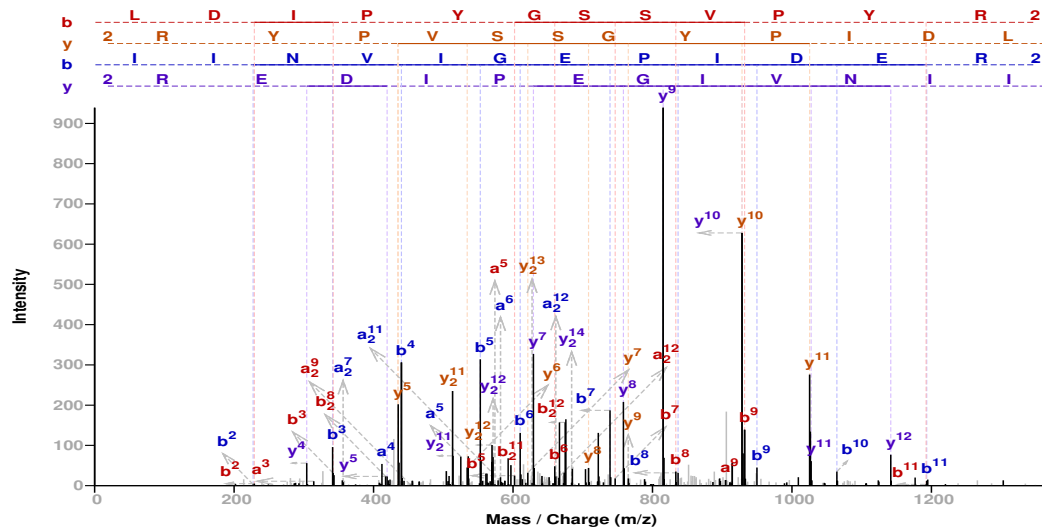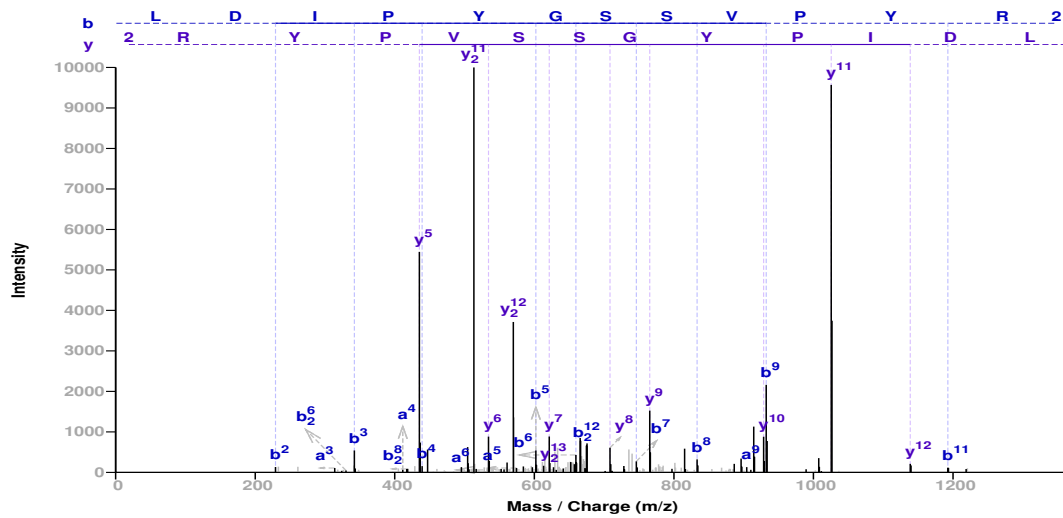

yeast5\_Scan\_Number\_5047 Precursor m/z: 538.292 cosine: 0.808  $\alpha$ : 0.362

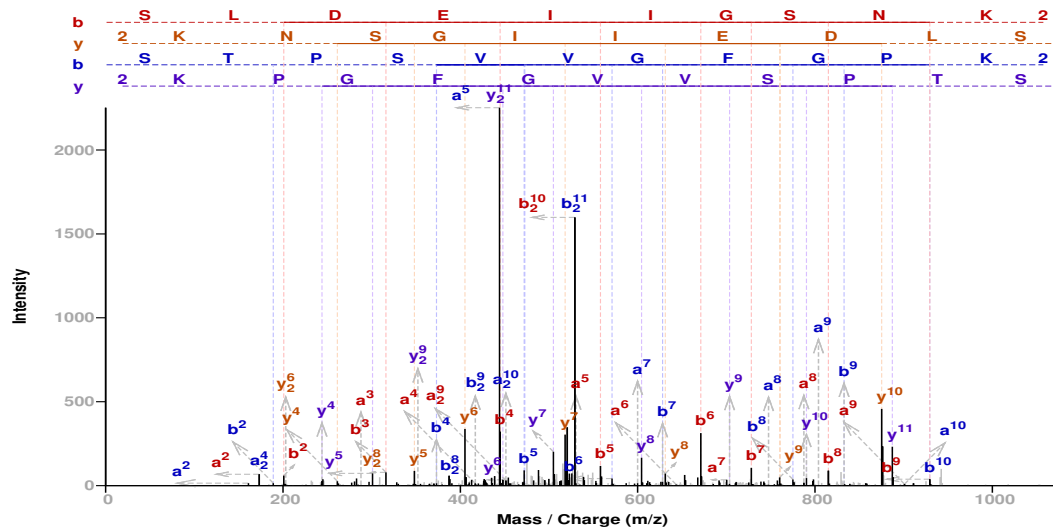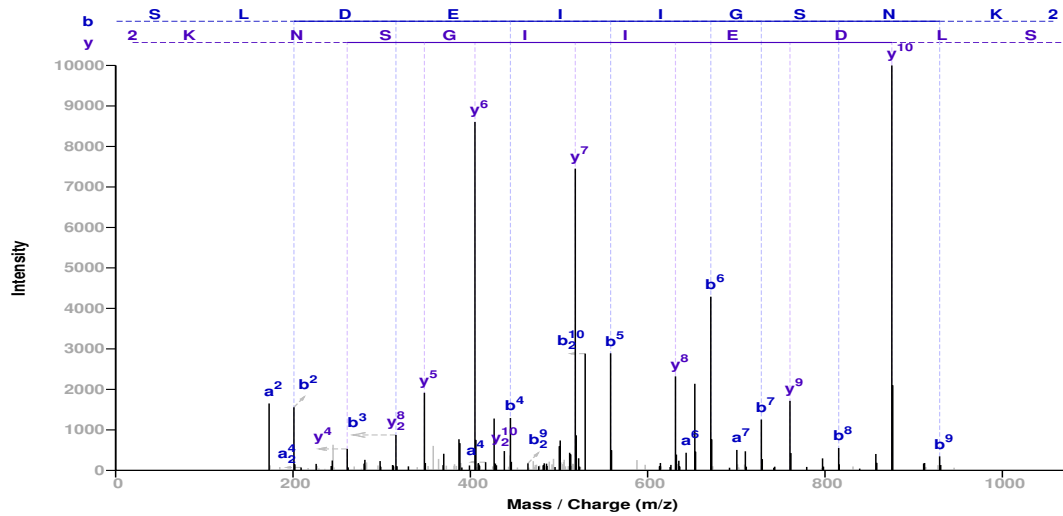

yeast5.Scan\_Number\_3727 Precursor m/z: 531.761 cosine: 0.901  $\alpha$ : 0.360

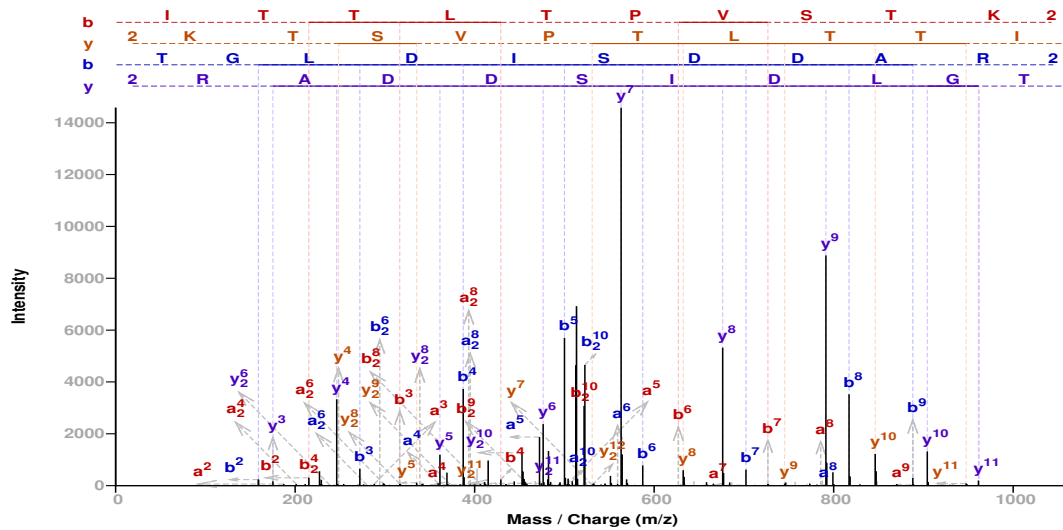



yeast5.Scan\_Number\_4722 Precursor m/z: 453.731 cosine: 0.812  $\alpha$ : 0.352

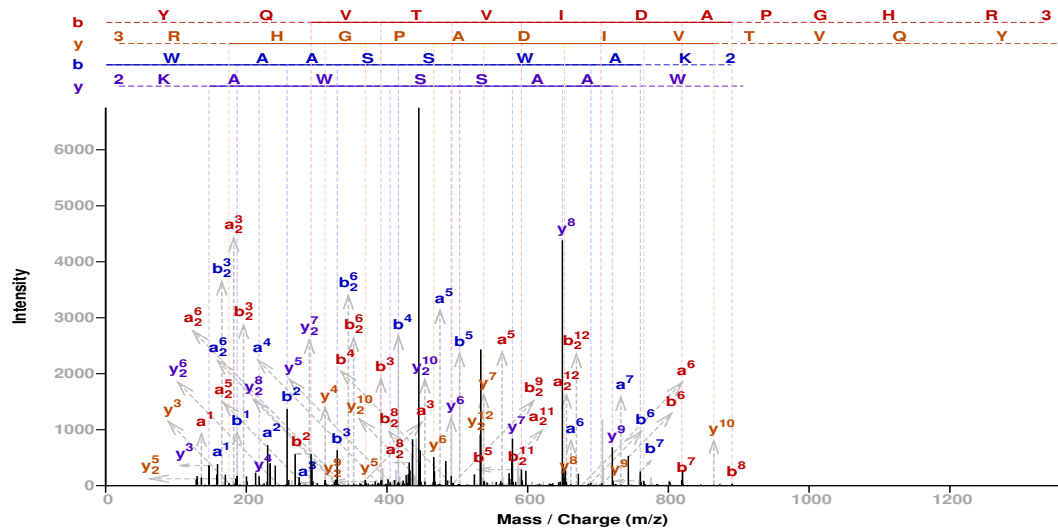



yeast5.Scan\_Number\_4231 Precursor m/z: 440.249 cosine: 0.755  $\alpha$ : 0.344

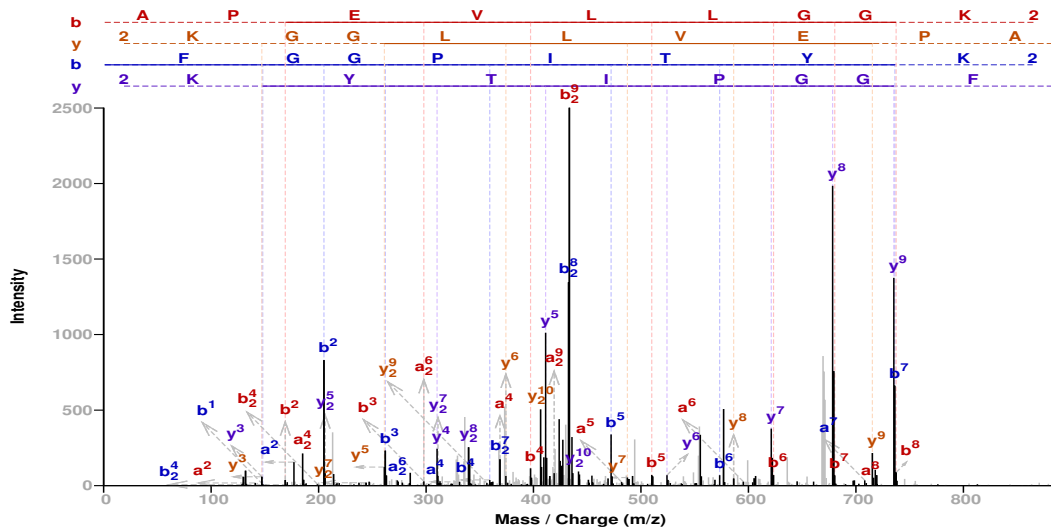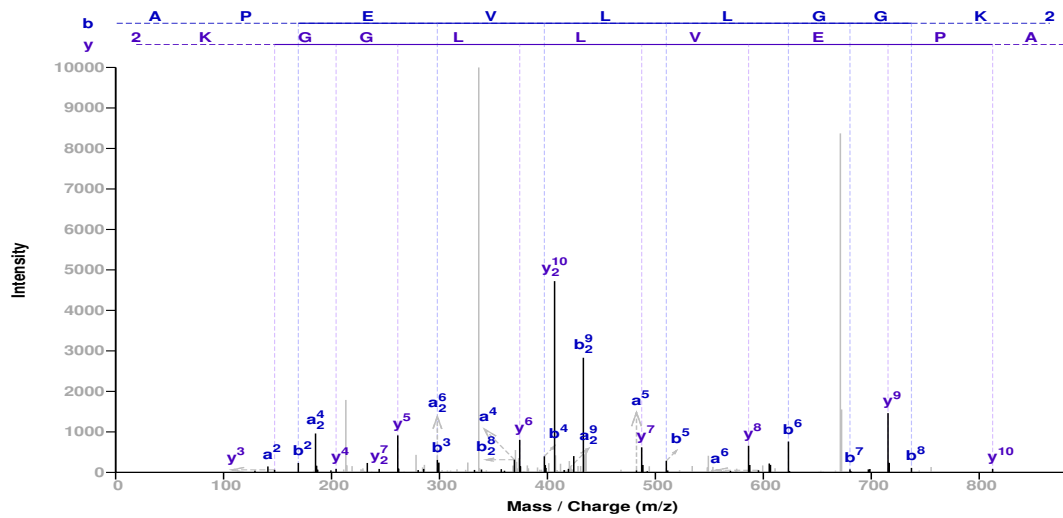

yeast5\_Scan\_Number\_3123 Precursor m/z: 641.306 cosine: 0.798  $\alpha$ : 0.343

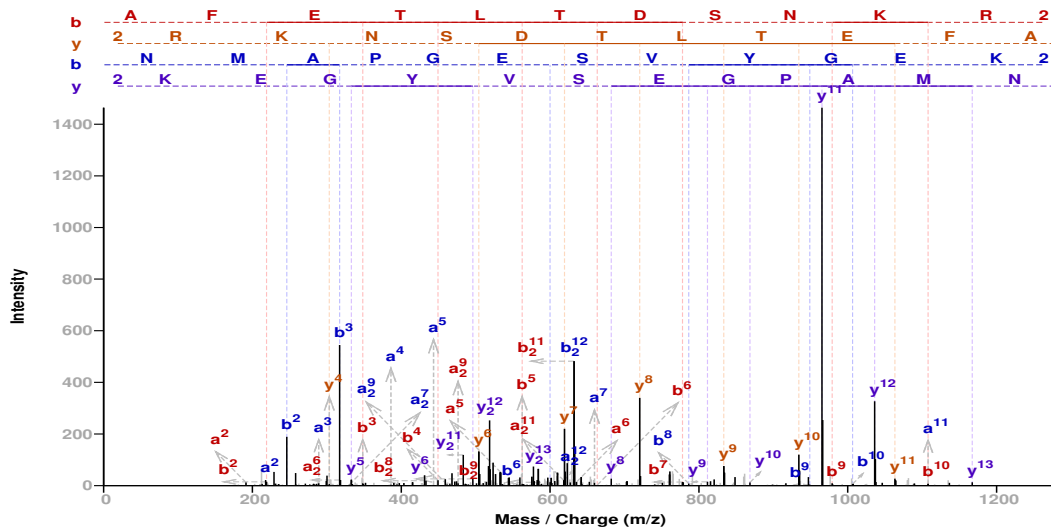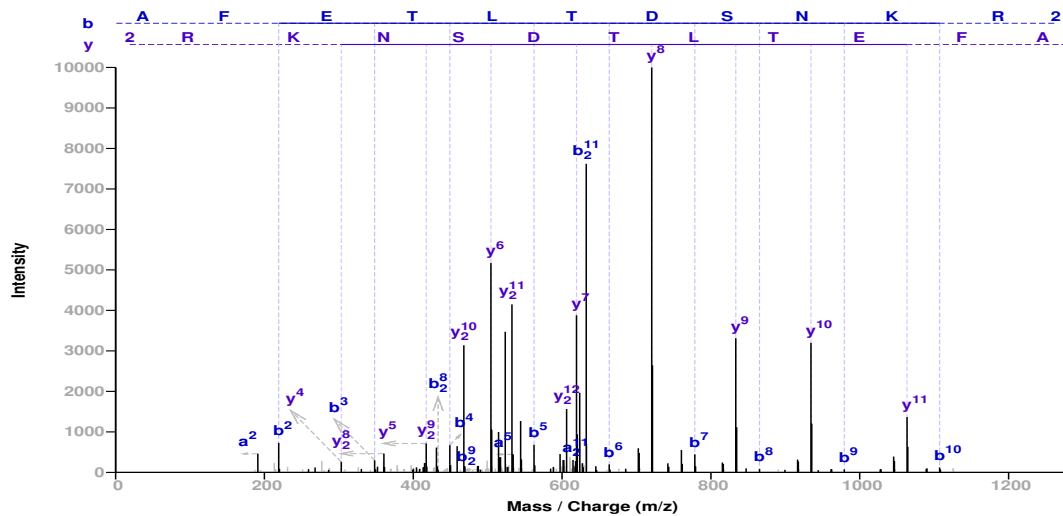

yeast5\_Scan\_Number\_1002 Precursor m/z: 391.235 cosine: 0.881  $\alpha$ : 0.334

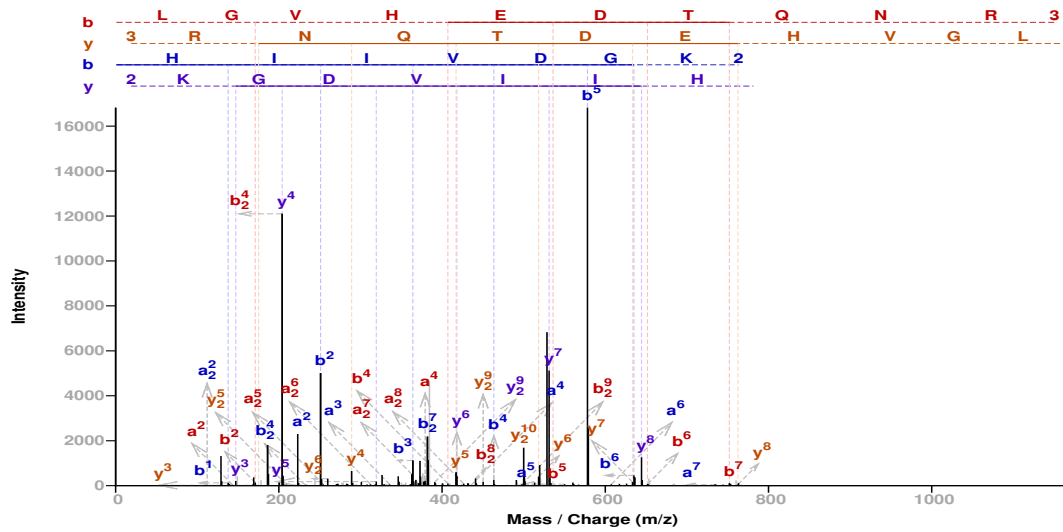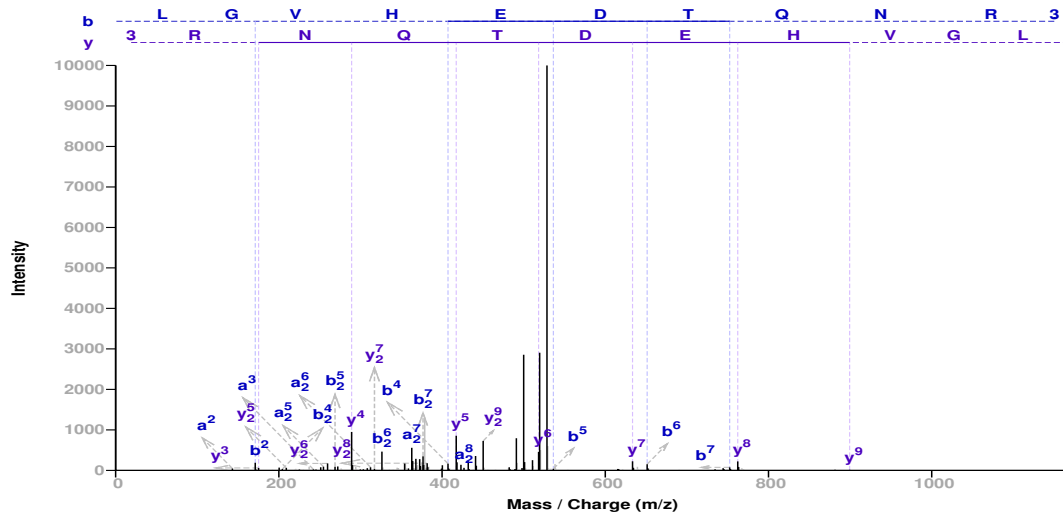

yeast5\_Scan\_Number\_3297 Precursor m/z: 403.728 cosine: 0.839  $\alpha$ : 0.328

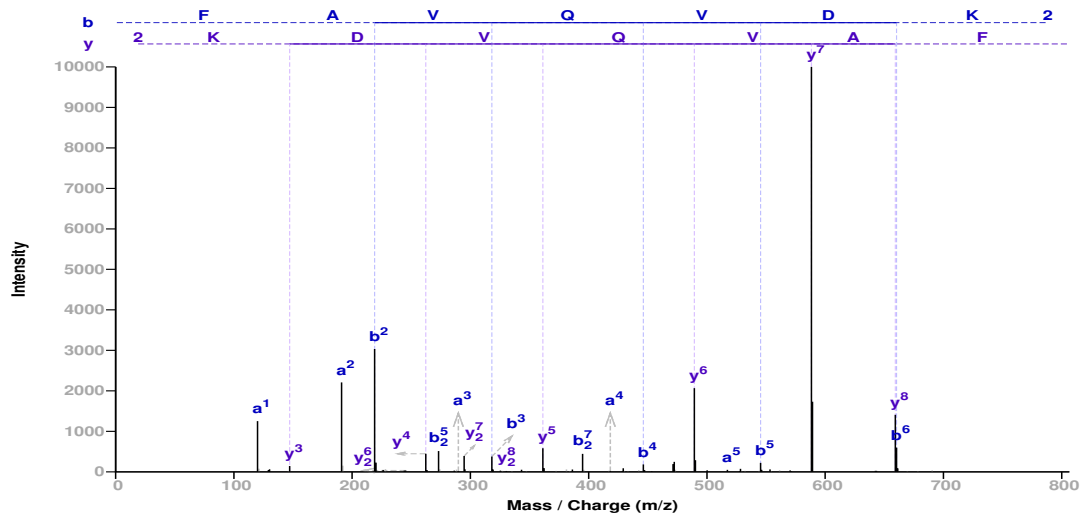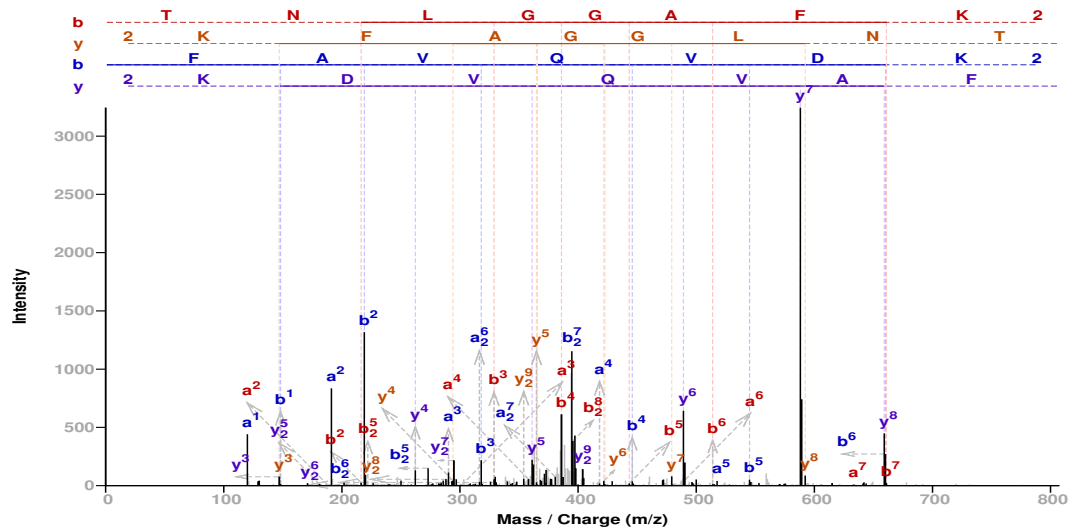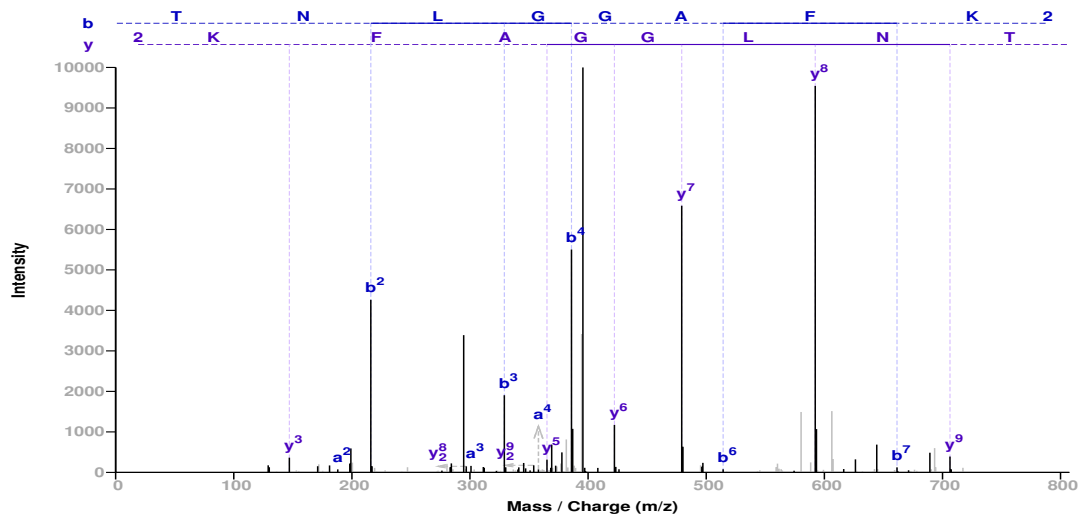

yeast5\_Scan\_Number\_2406 Precursor m/z: 492.285 cosine: 0.785  $\alpha$ : 0.326

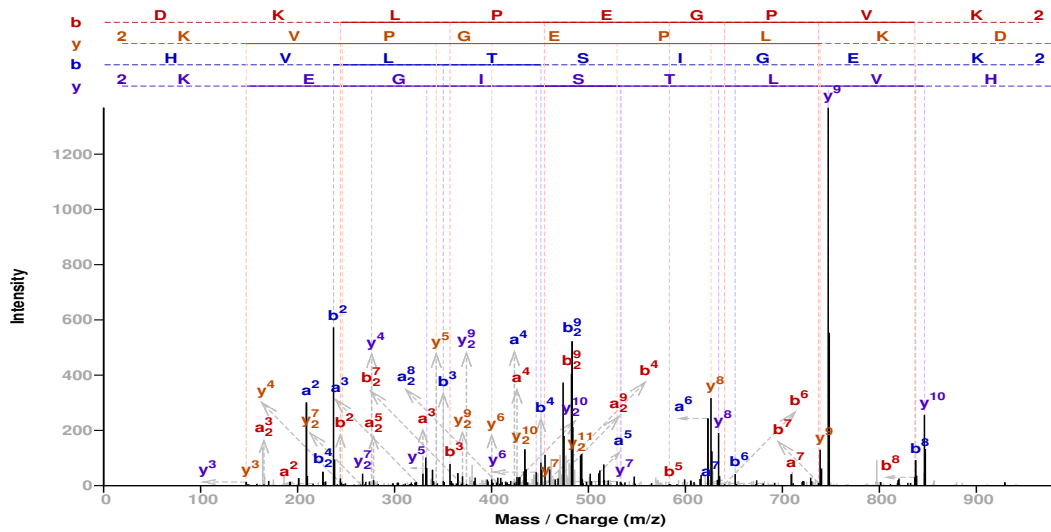

yeast5\_Scan\_Number\_6253 Precursor m/z: 599.316 cosine: 0.753  $\alpha$ : 0.320

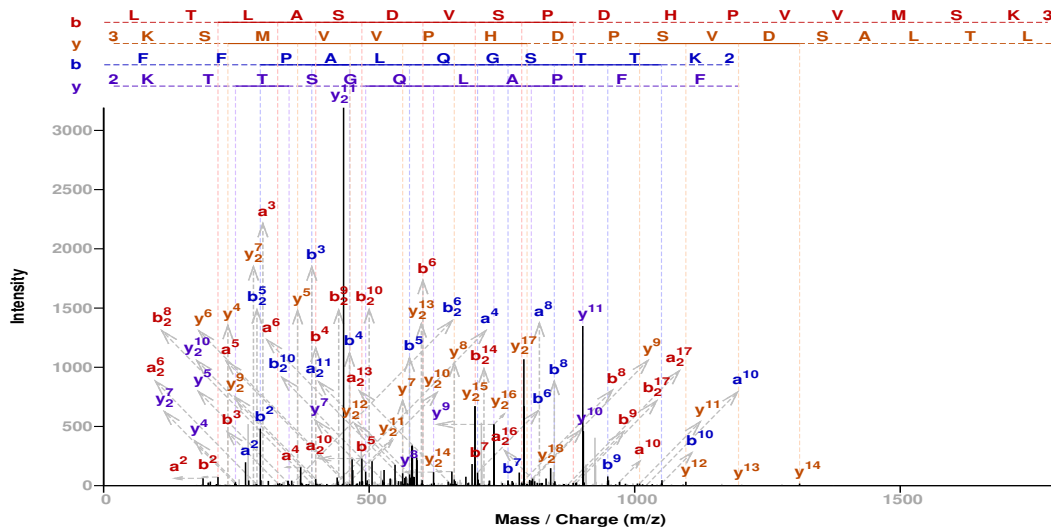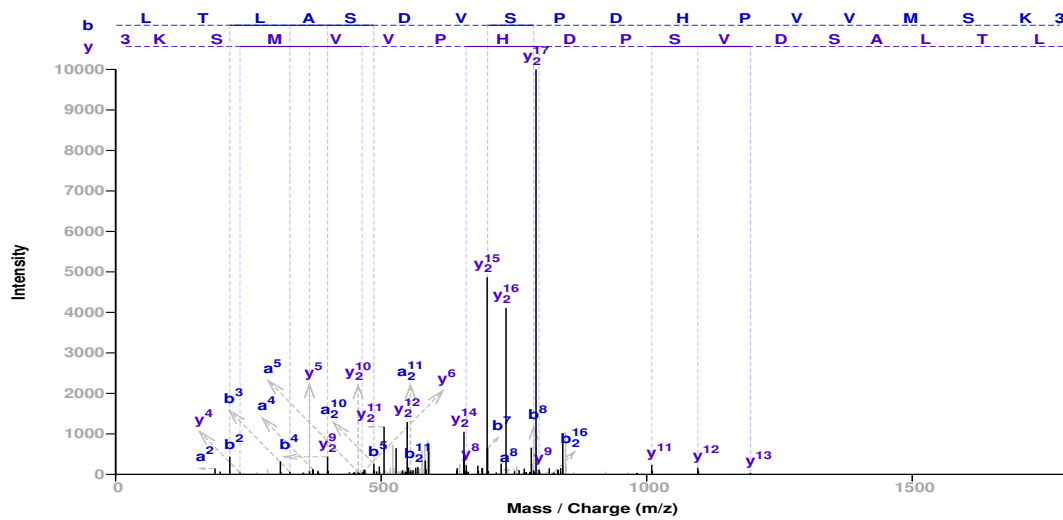

yeast5\_Scan\_Number\_4908 Precursor m/z: 769.385 cosine: 0.786  $\alpha$ : 0.319

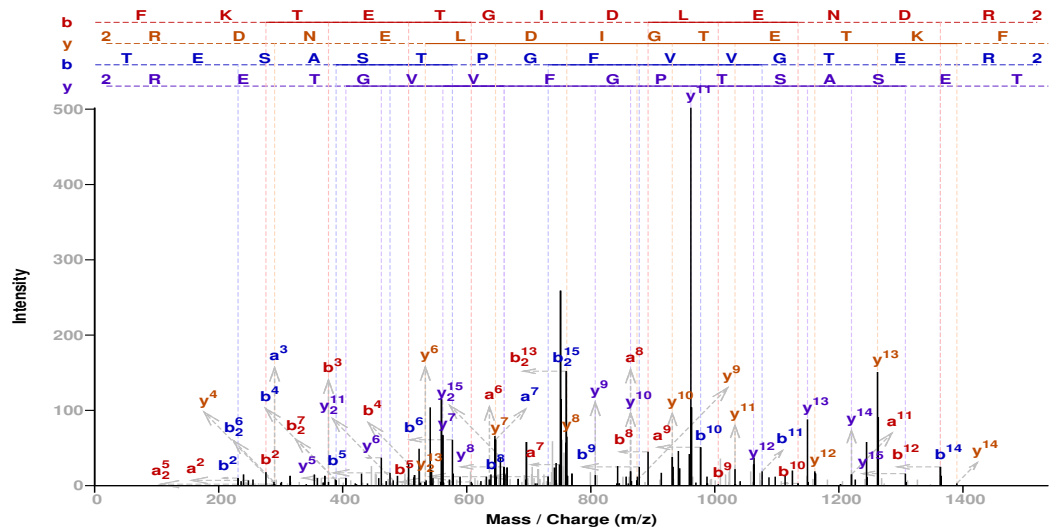

yeast5\_Scan\_Number\_8060 Precursor m/z: 623.337 cosine: 0.784  $\alpha$ : 0.316

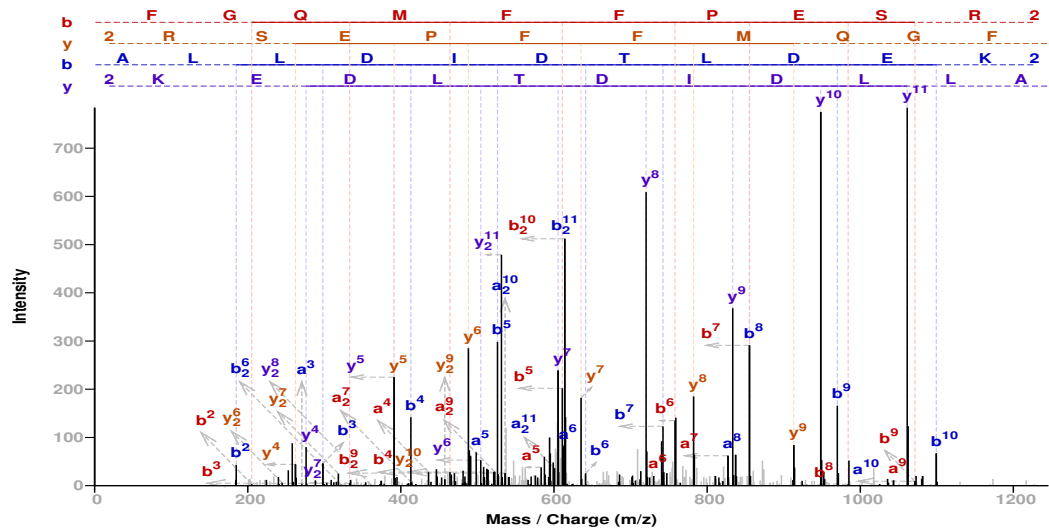



yeast5\_Scan\_Number\_2790 Precursor m/z: 413.555 cosine: 0.743  $\alpha$ : 0.308

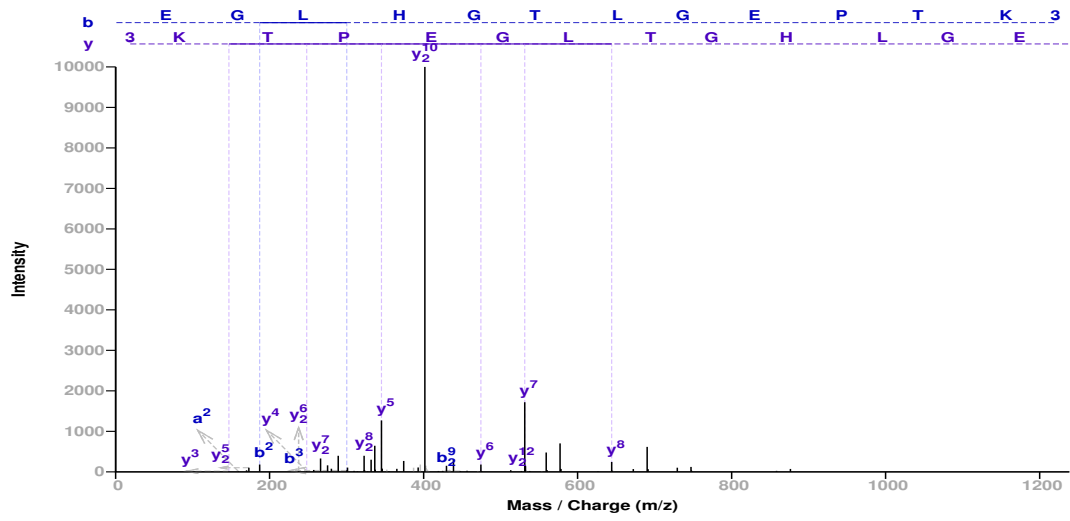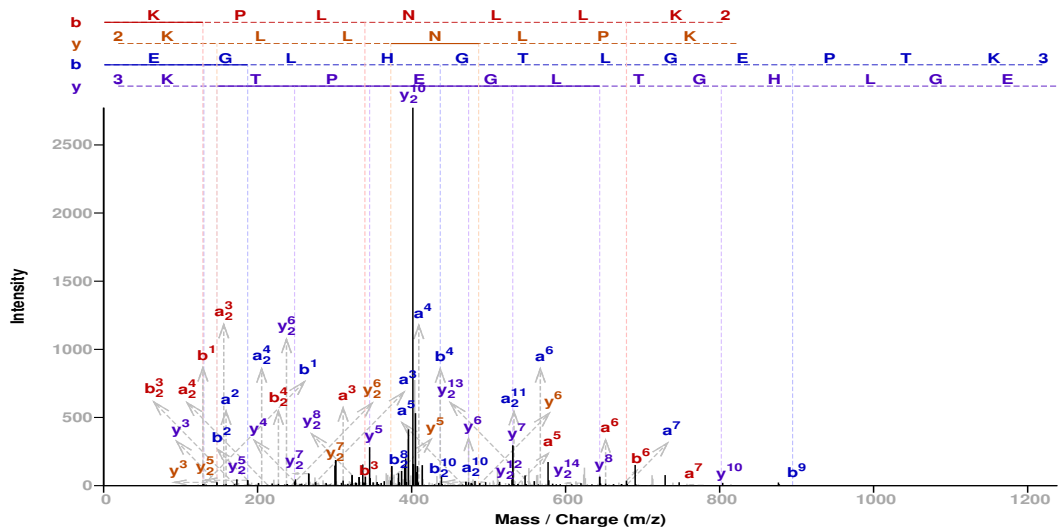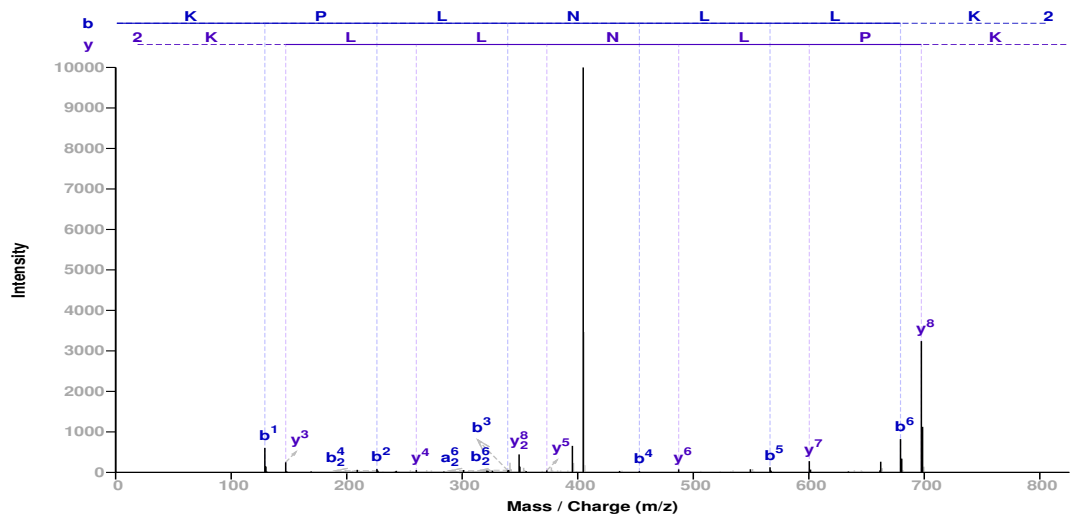

yeast5\_Scan\_Number\_5929 Precursor m/z: 555.355 cosine: 0.844  $\alpha$ : 0.306

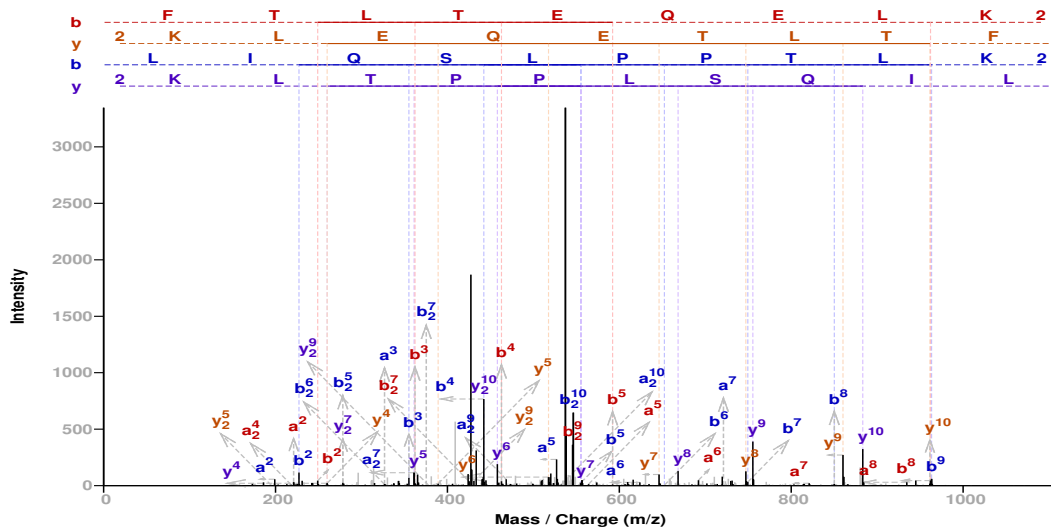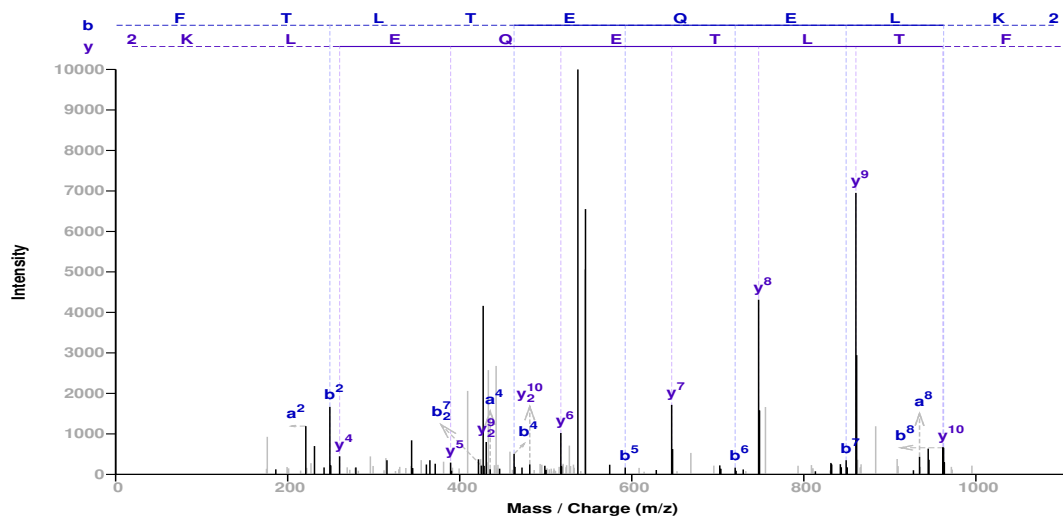

yeast5\_Scan\_Number\_2800 Precursor m/z: 459.253 cosine: 0.797  $\alpha$ : 0.299

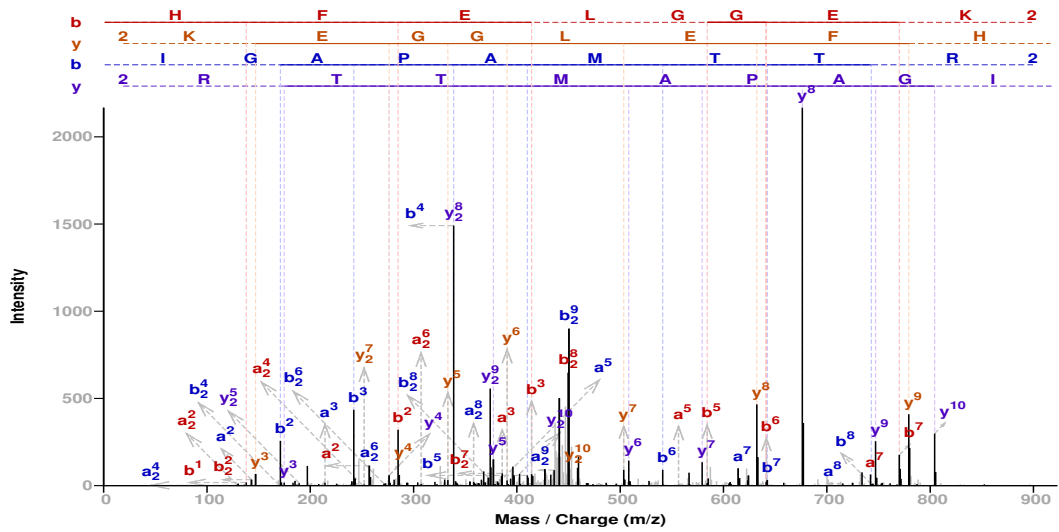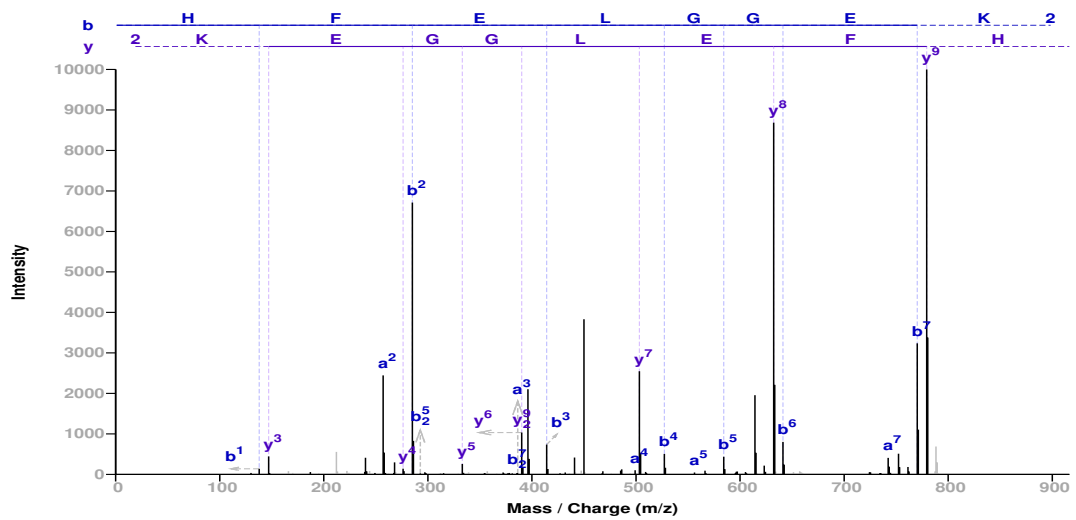

yeast5.Scan\_Number\_6694 Precursor m/z: 541.308 cosine: 0.751  $\alpha$ : 0.299

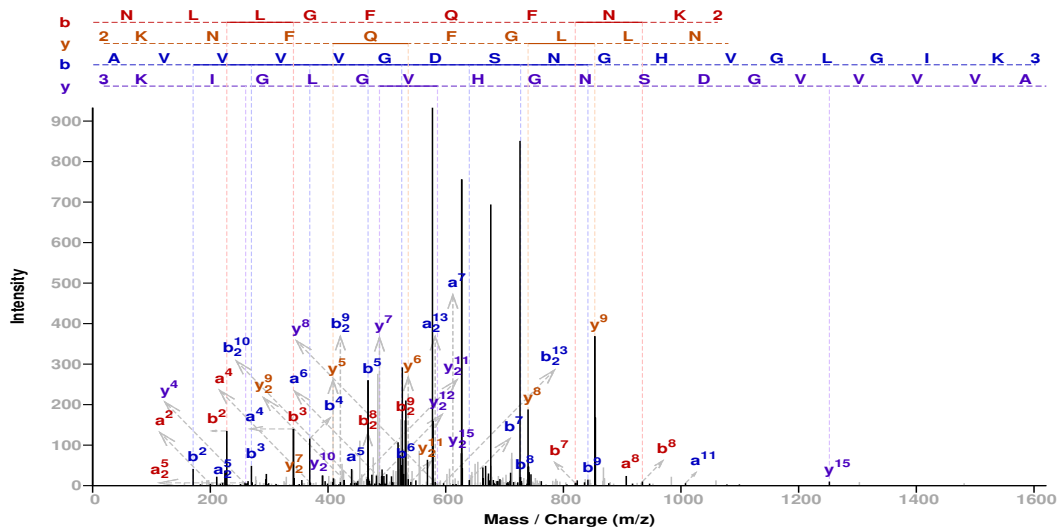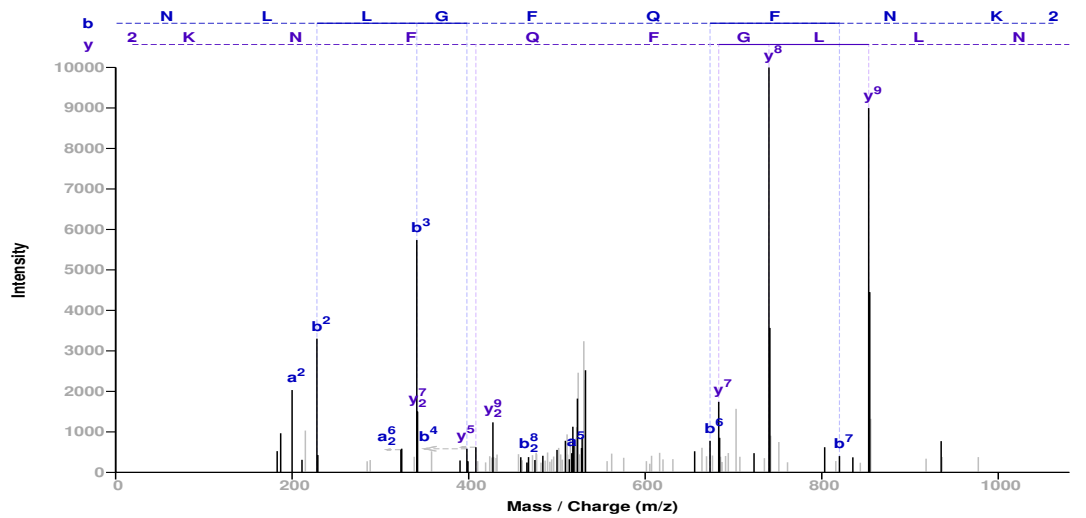

yeast5\_Scan\_Number\_2698 Precursor m/z: 428.241 cosine: 0.795  $\alpha$ : 0.298

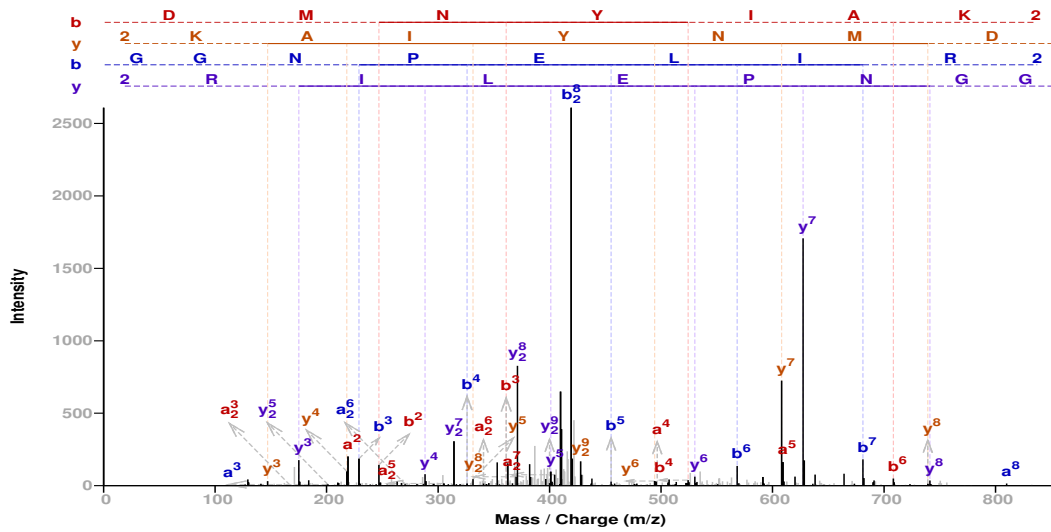

yeast5\_Scan\_Number\_5699 Precursor m/z: 799.912 cosine: 0.879  $\alpha$ : 0.296

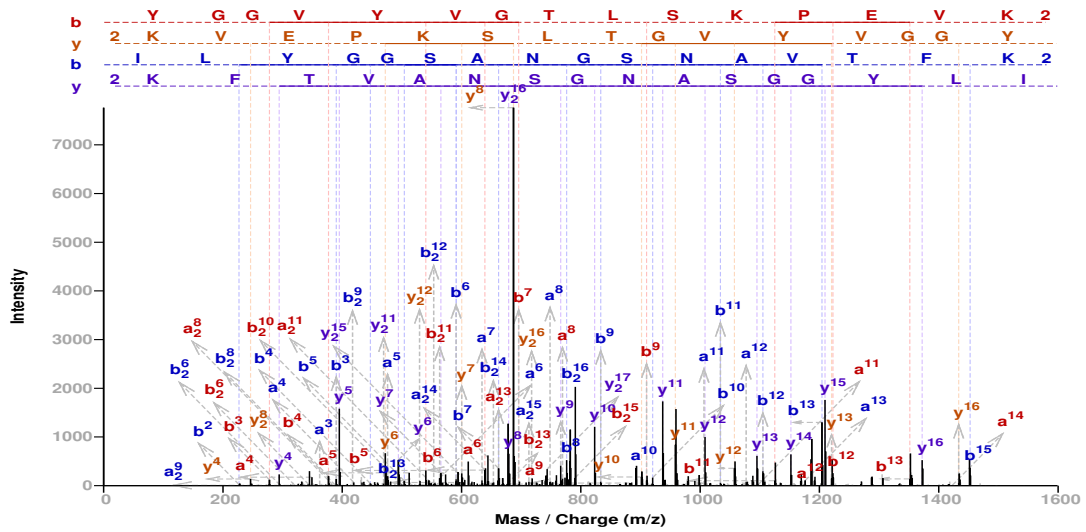

yeast5.Scan\_Number\_7922 Precursor m/z: 749.414 cosine: 0.835  $\alpha$ : 0.294

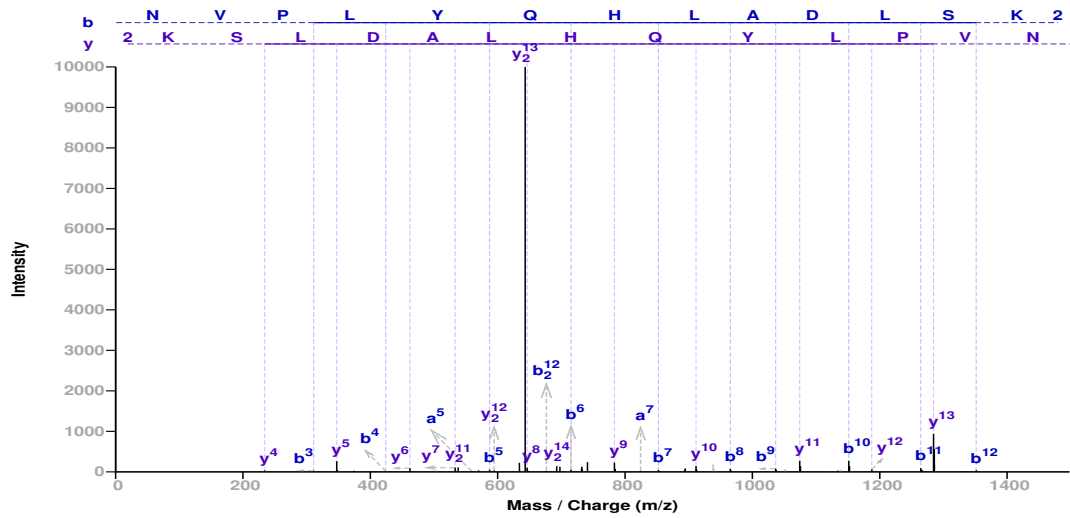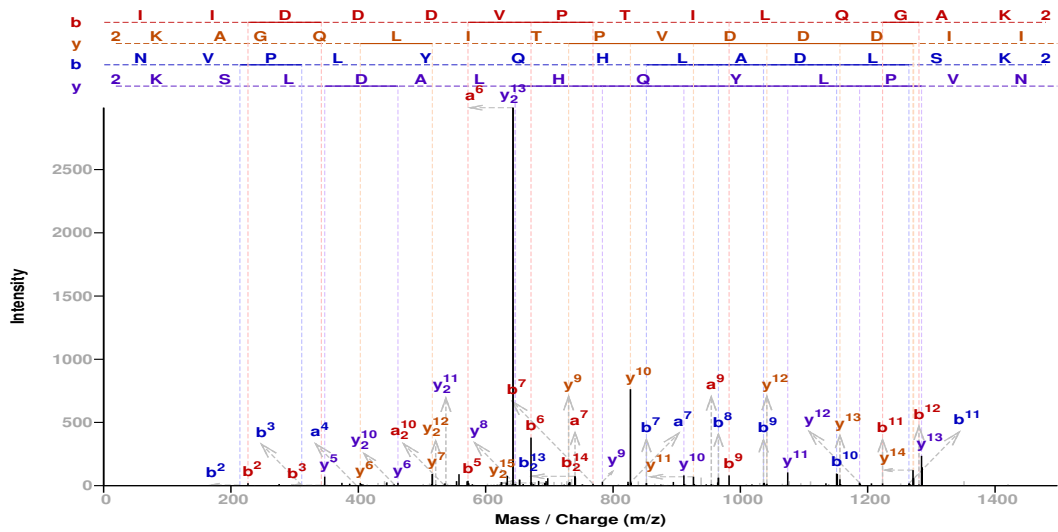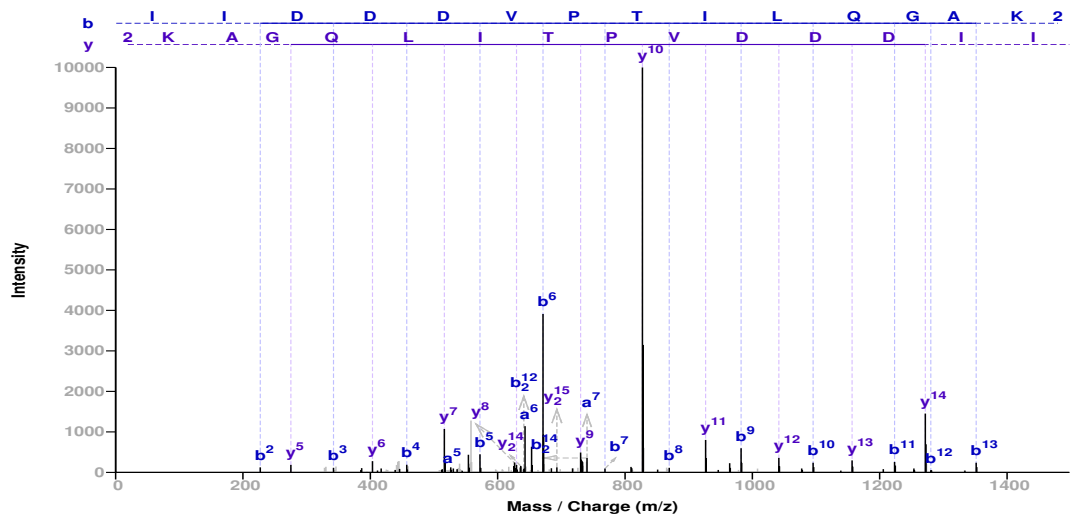

yeast5.Scan\_Number\_4342 Precursor m/z: 526.771 cosine: 0.765  $\alpha$ : 0.289

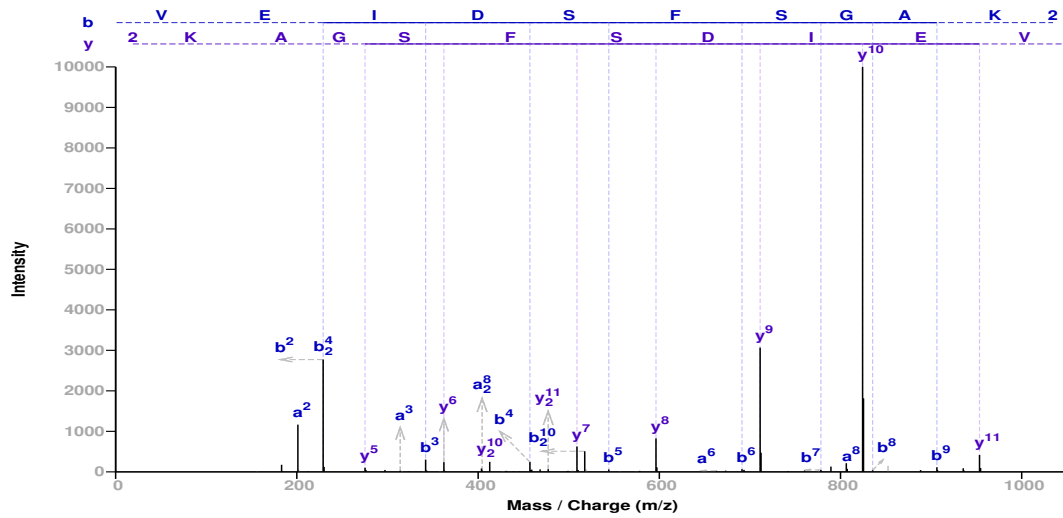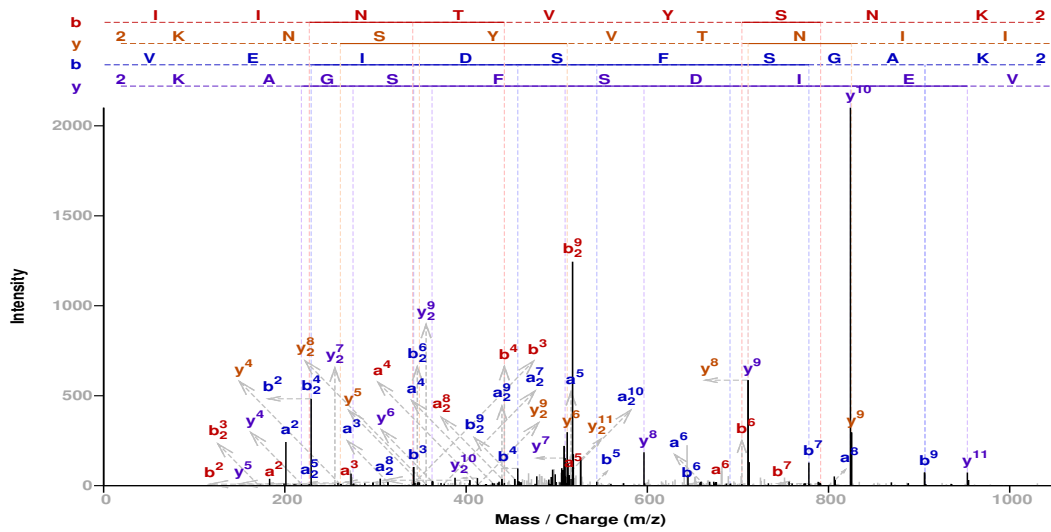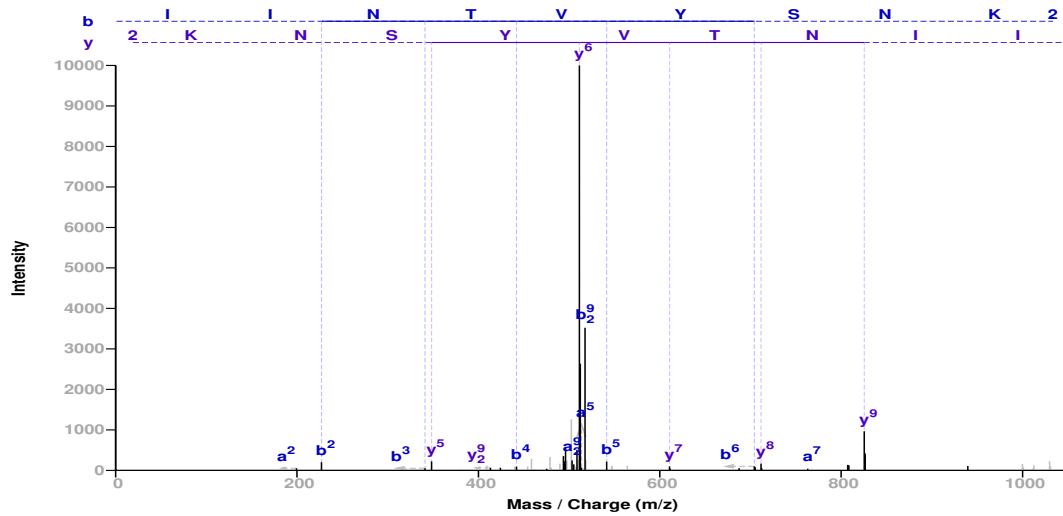



yeast5.Scan\_Number\_3279 Precursor m/z: 380.512 cosine: 0.911  $\alpha$ : 0.285

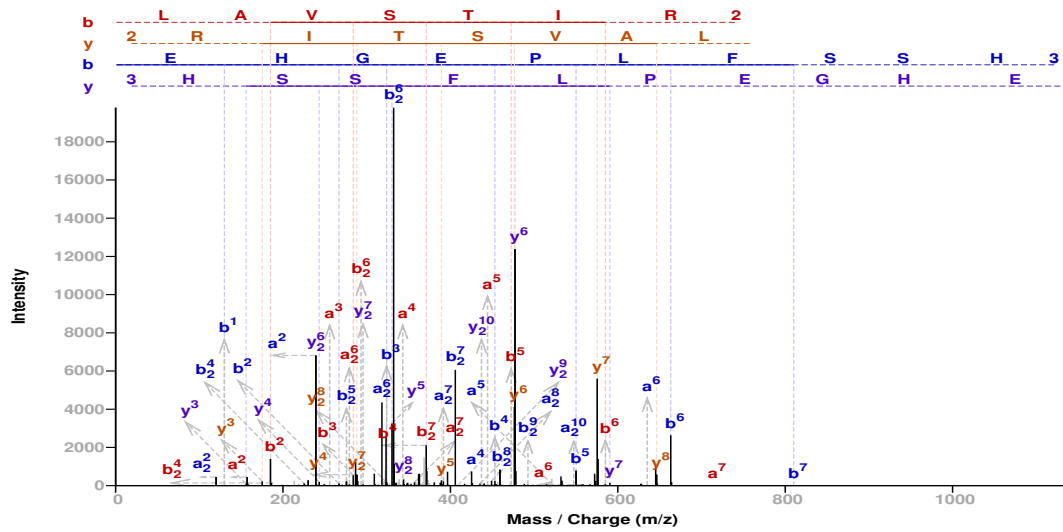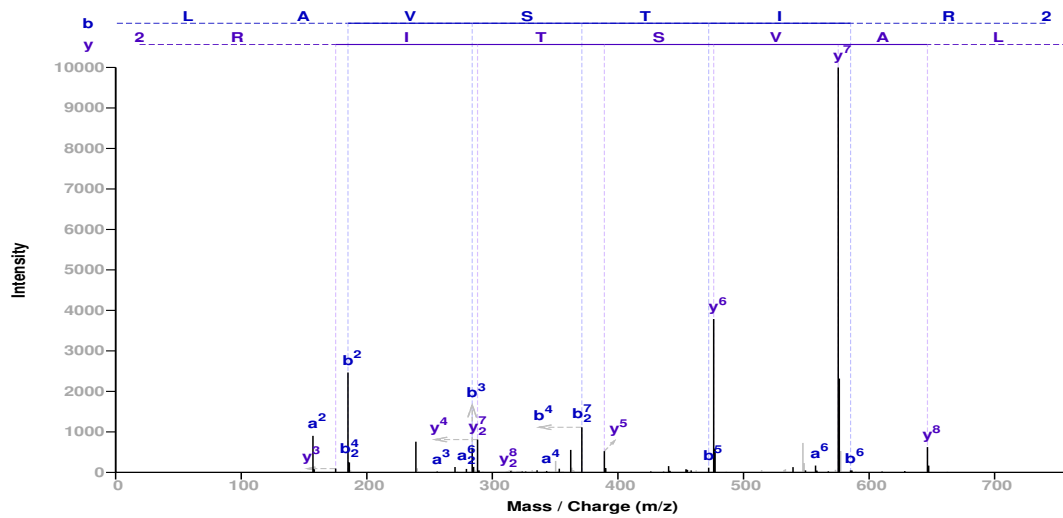



yeast5\_Scan\_Number\_6489 Precursor m/z: 530.763 cosine: 0.782  $\alpha$ : 0.282

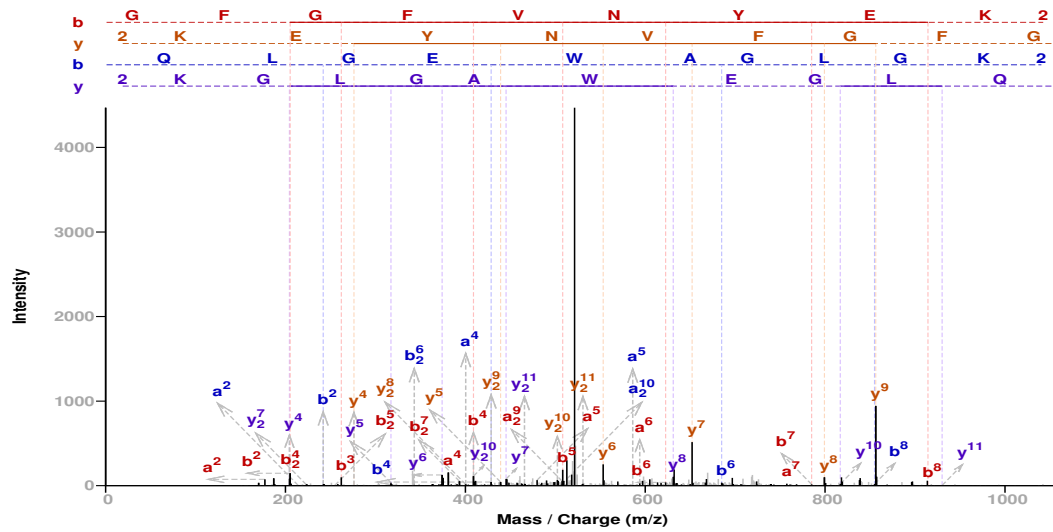

yeast5\_Scan\_Number\_2916 Precursor m/z: 335.538 cosine: 0.750  $\alpha$ : 0.278

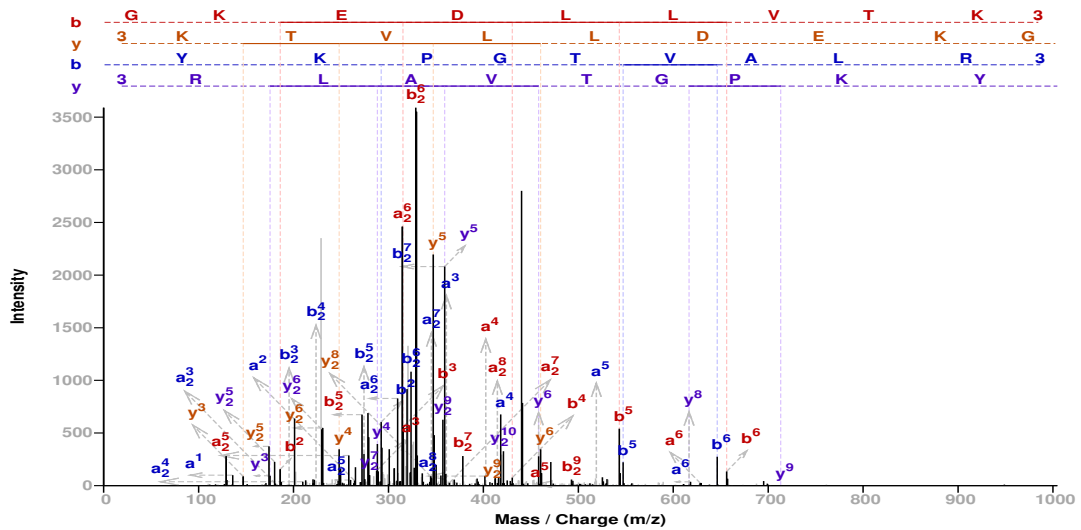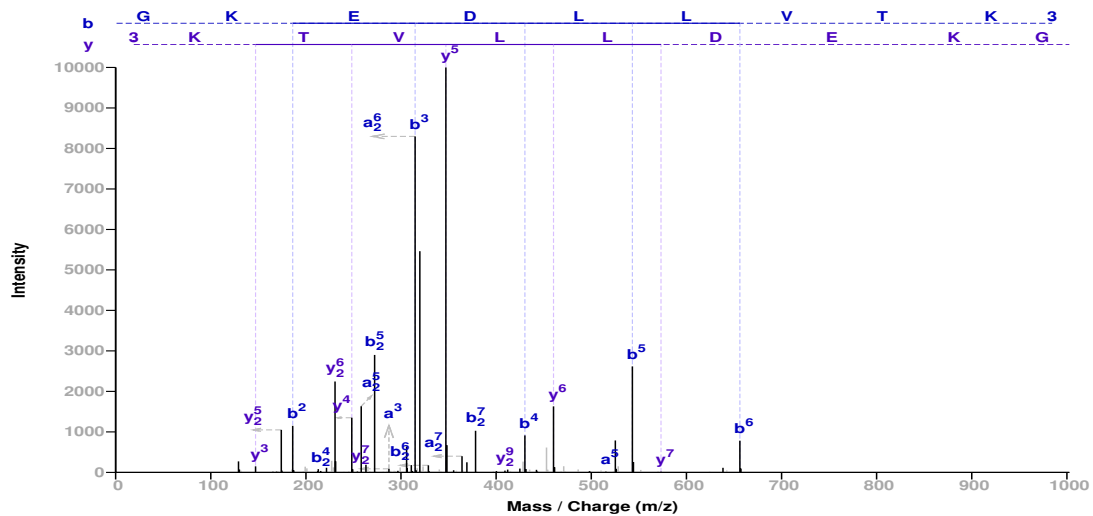

yeast5.Scan\_Number\_2498 Precursor m/z: 401.230 cosine: 0.794  $\alpha$ : 0.277

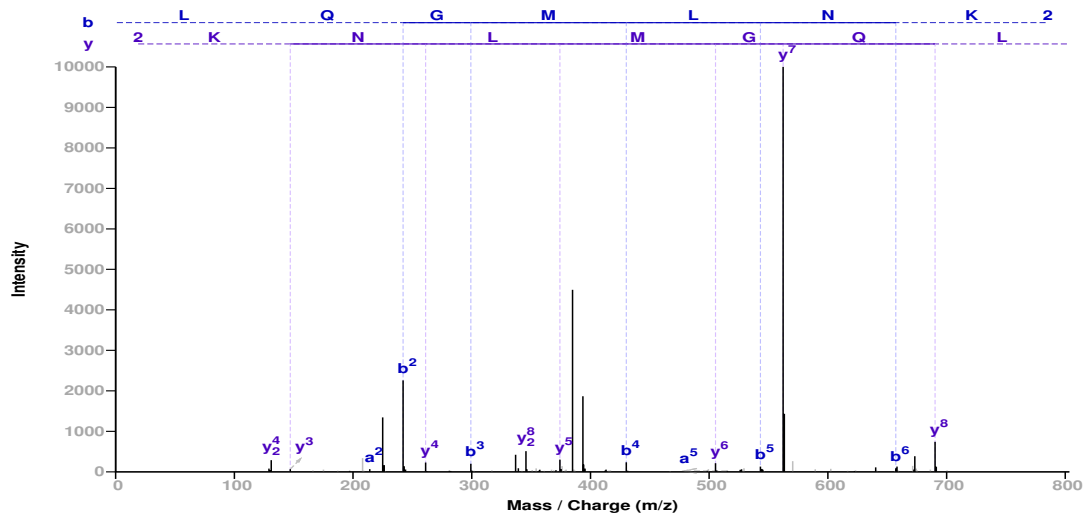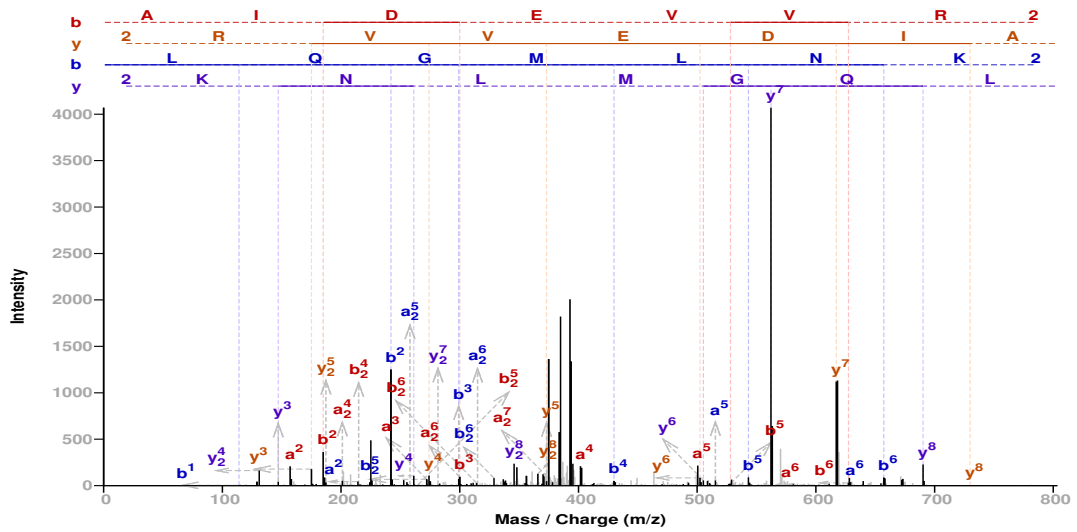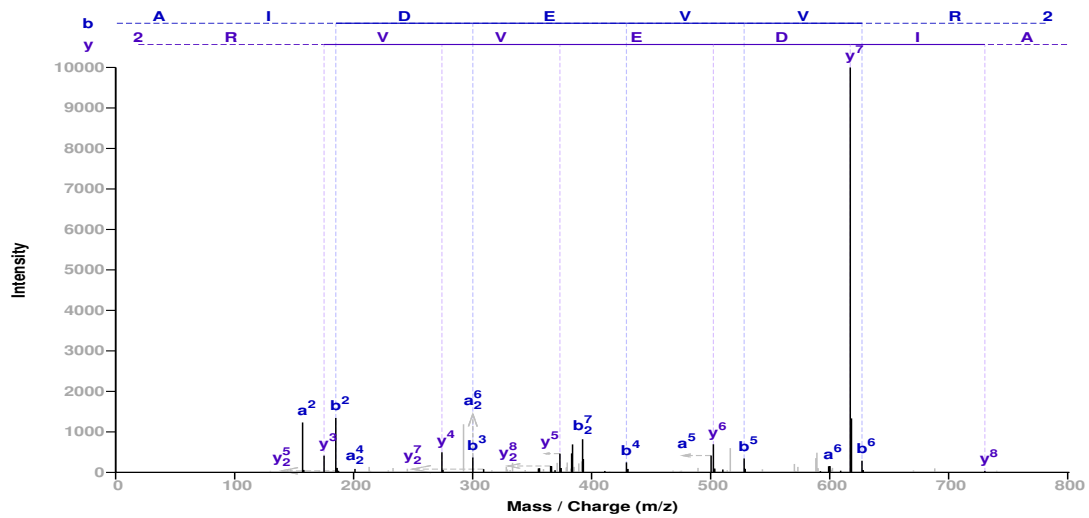

yeast5\_Scan\_Number\_7942 Precursor m/z: 639.348 cosine: 0.789  $\alpha$ : 0.263

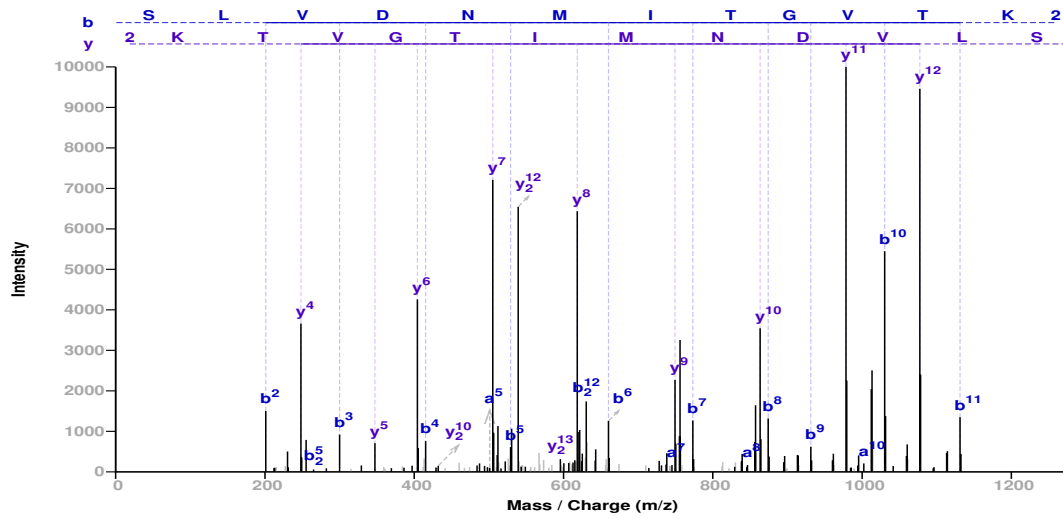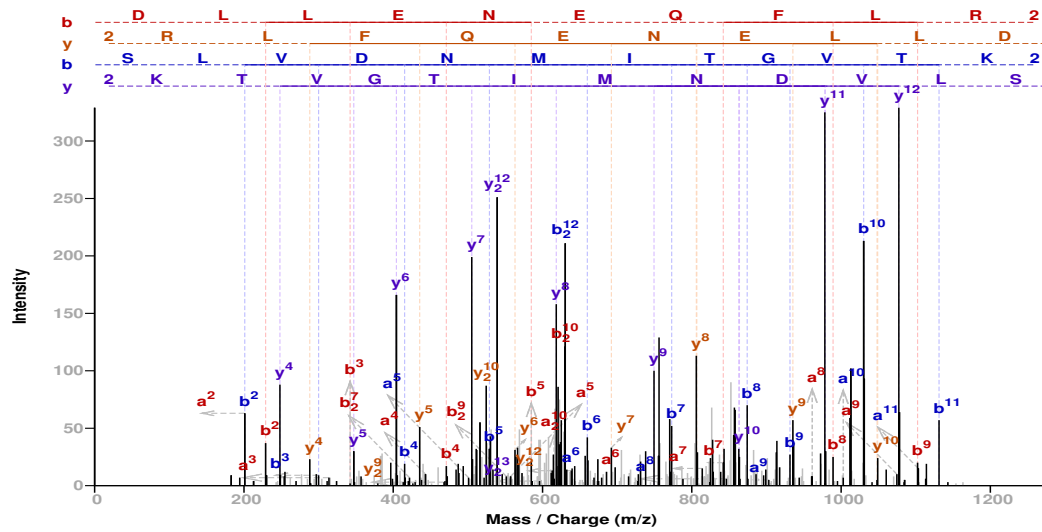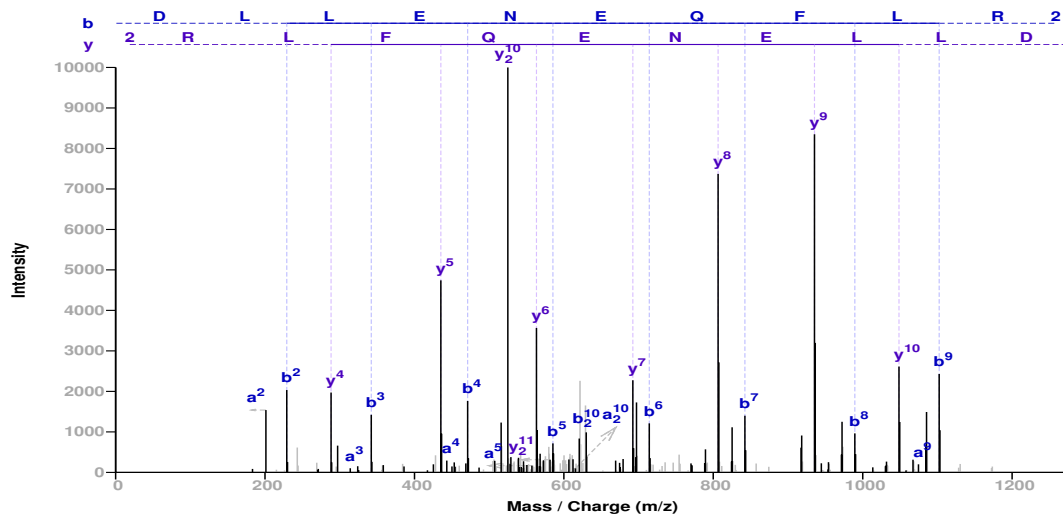

yeast5\_Scan\_Number\_1835 Precursor m/z: 387.233 cosine: 0.777  $\alpha$ : 0.262

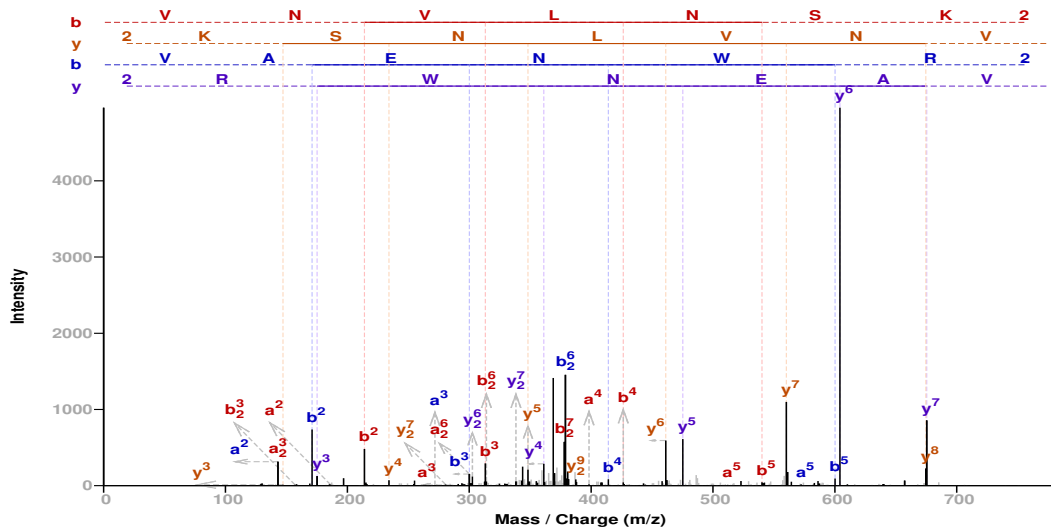

yeast5\_Scan\_Number\_6373 Precursor m/z: 436.236 cosine: 0.942  $\alpha$ : 0.257

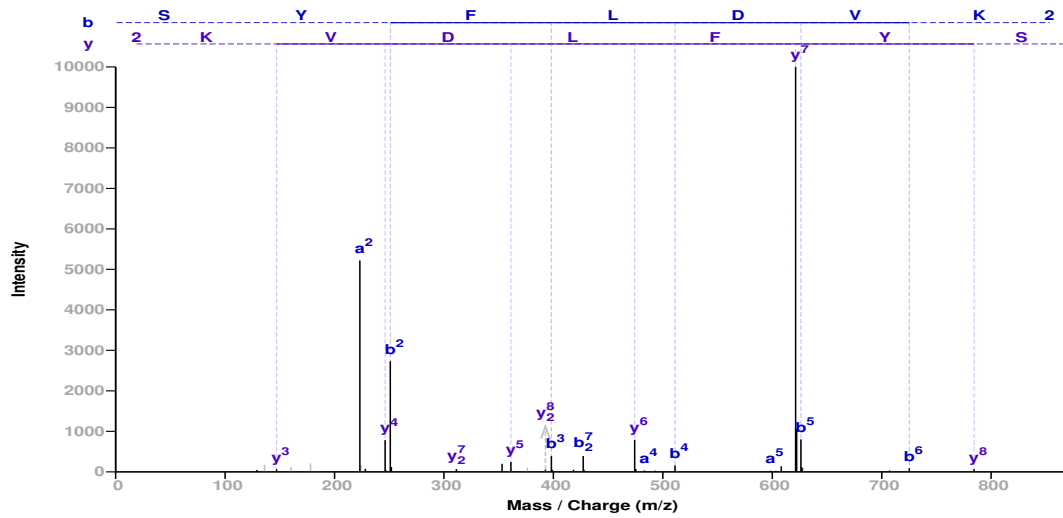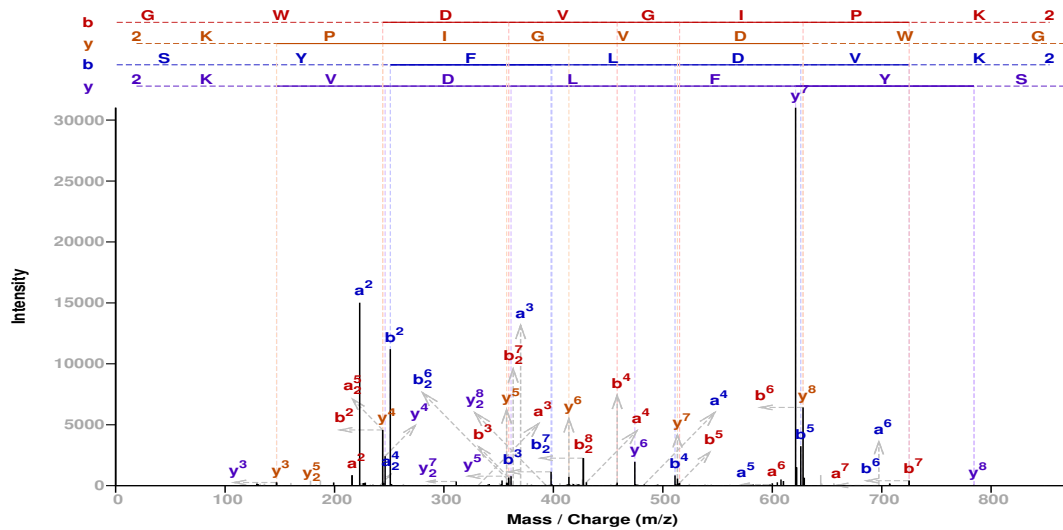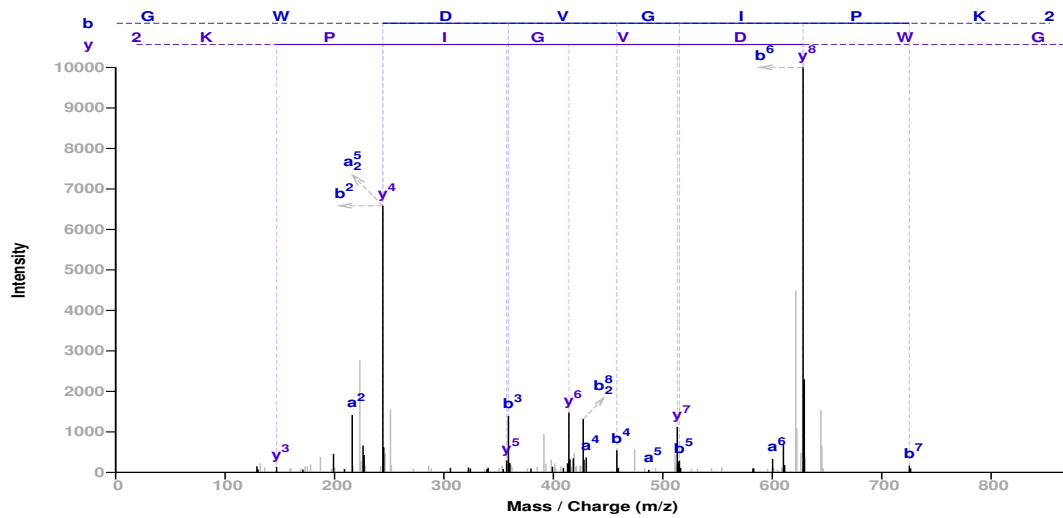



yeast5\_Scan\_Number\_3046 Precursor m/z: 431.743 cosine: 0.836  $\alpha$ : 0.255

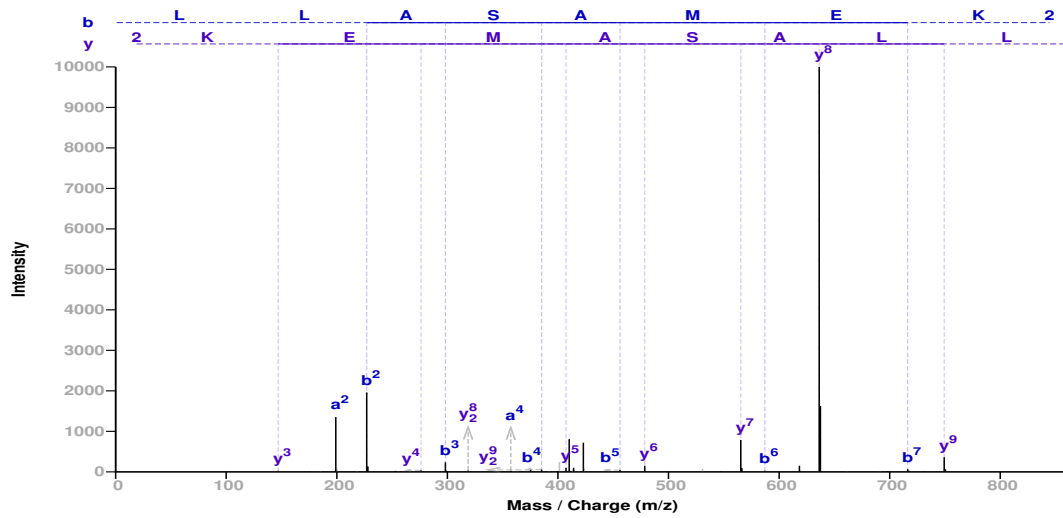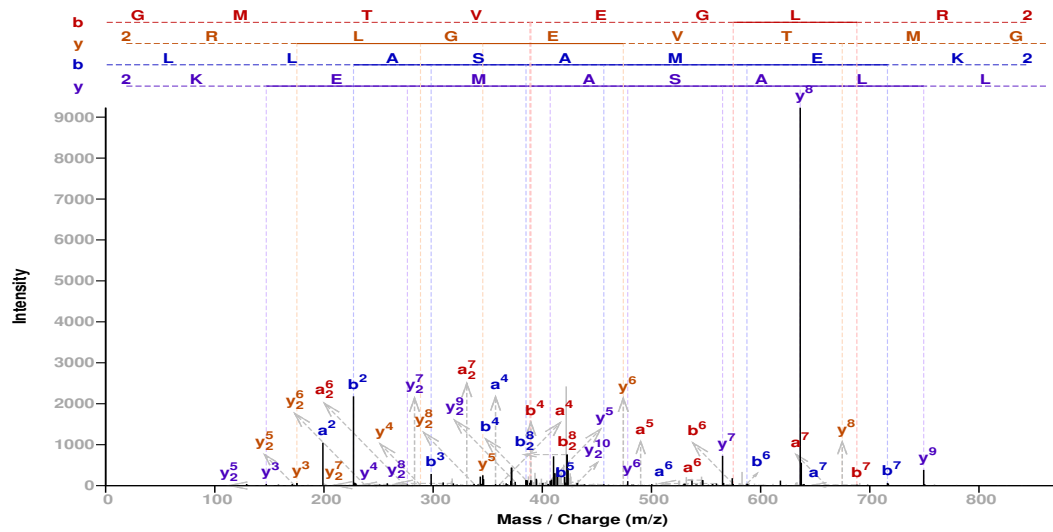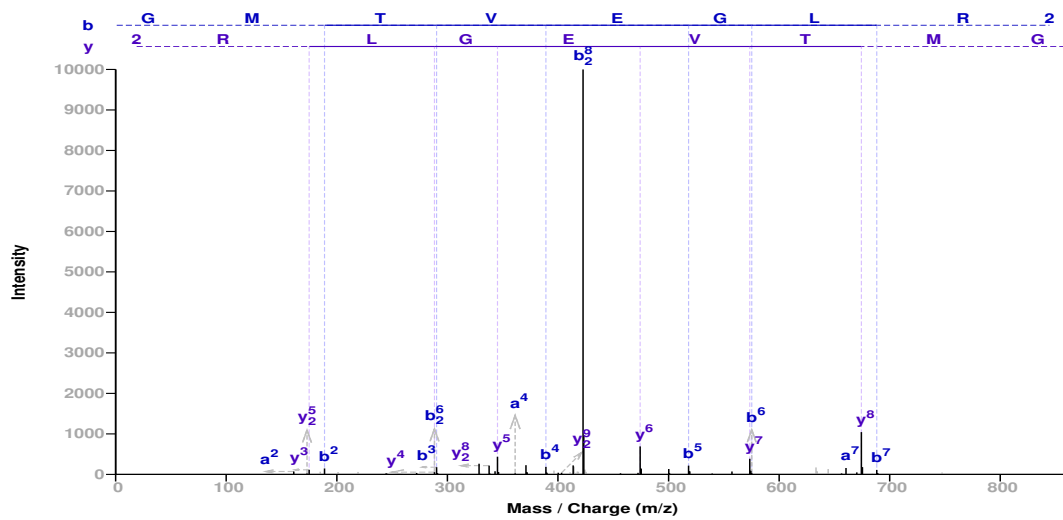

yeast5.Scan\_Number.2168 Precursor m/z: 424.252 cosine: 0.945  $\alpha$ : 0.249

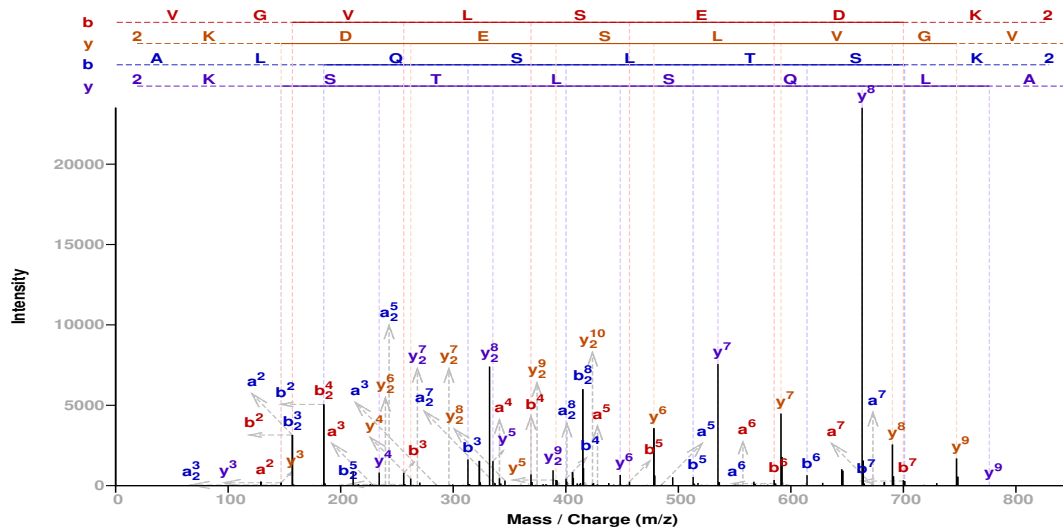

yeast5\_Scan\_Number\_5928 Precursor m/z: 617.858 cosine: 0.777  $\alpha$ : 0.246

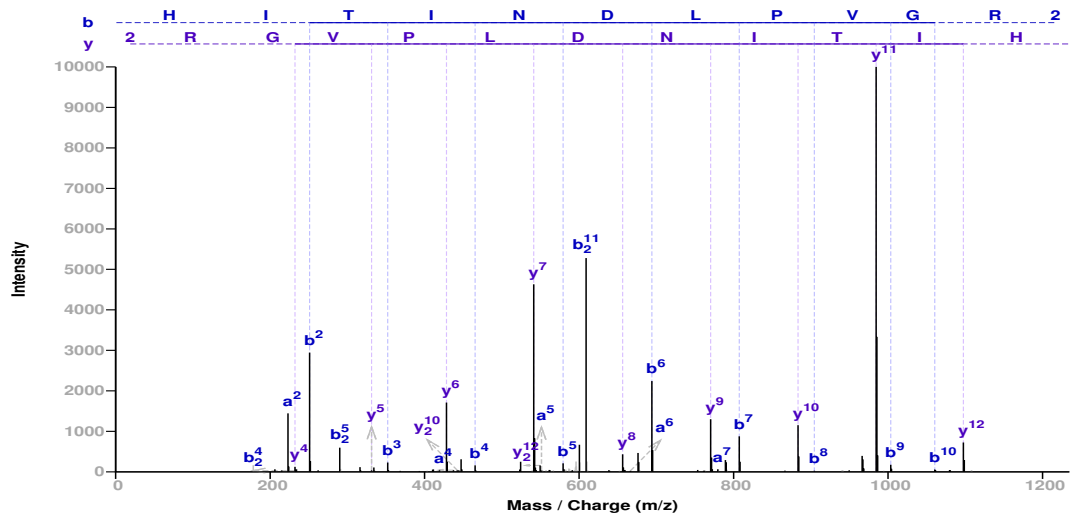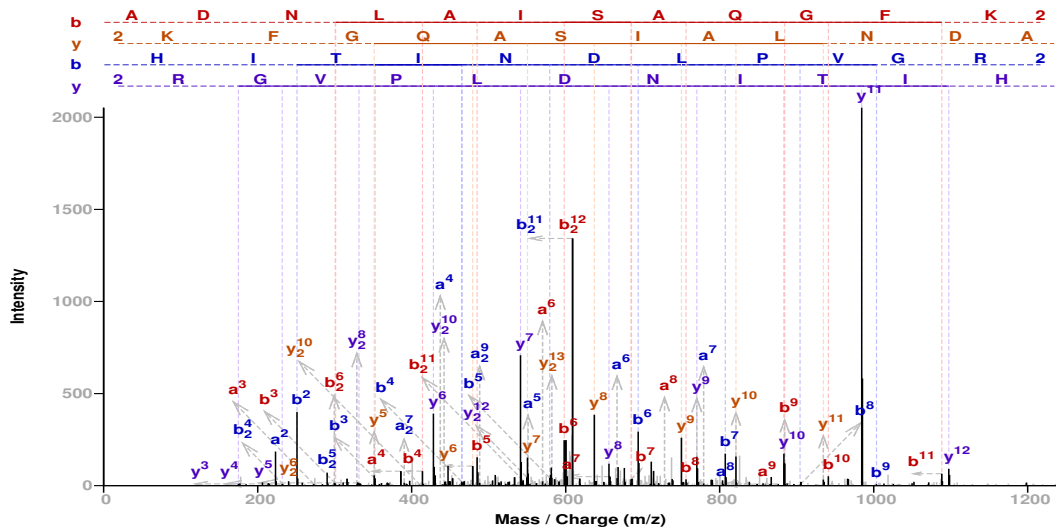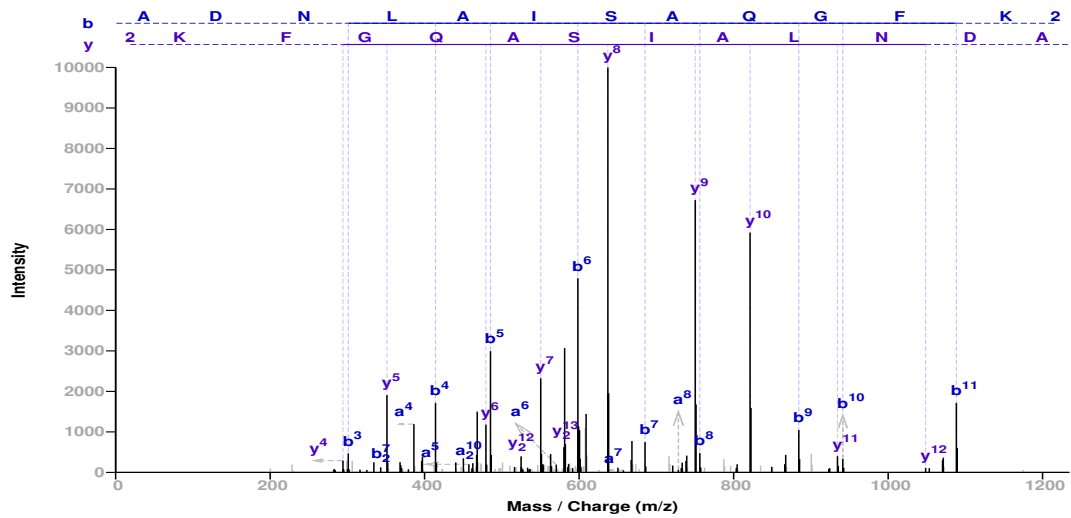

yeast5.Scan\_Number\_2658 Precursor m/z: 396.720 cosine: 0.857  $\alpha$ : 0.246

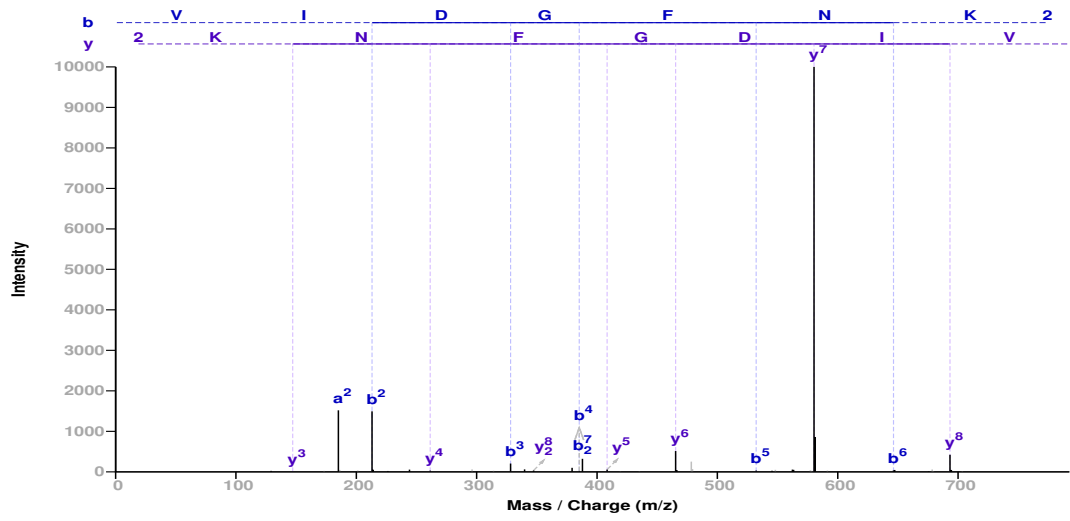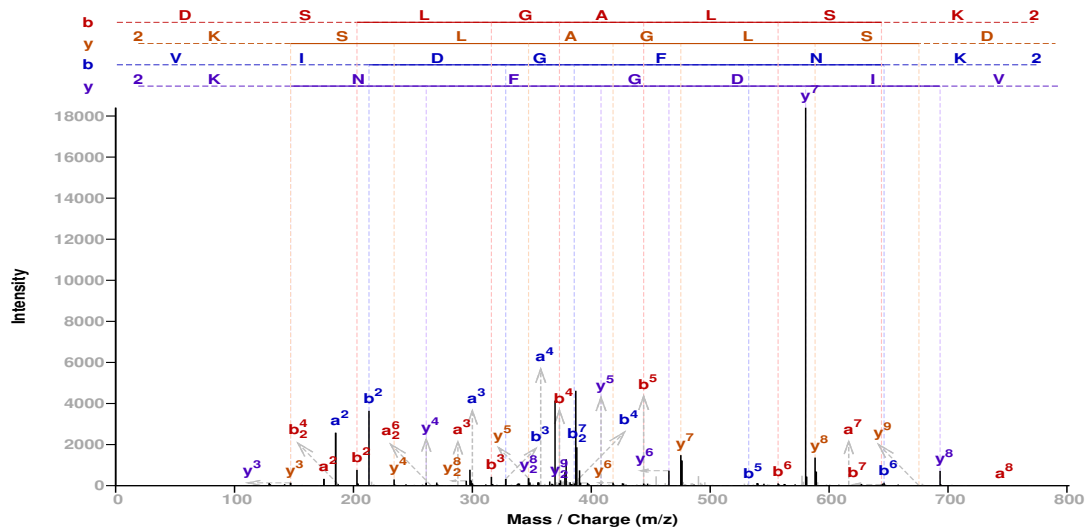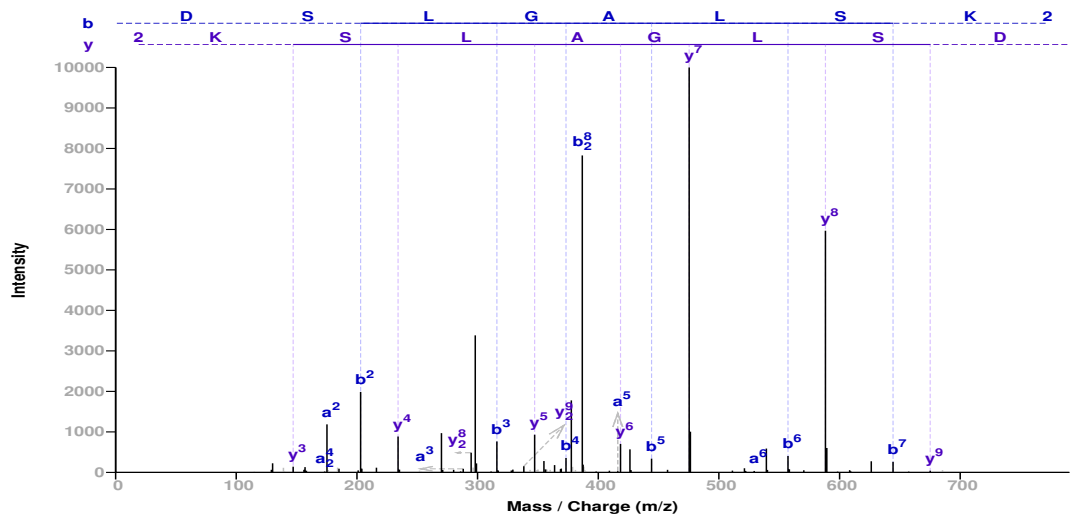



yeast5.Scan\_Number.1927 Precursor m/z: 509.264 cosine: 0.760  $\alpha$ : 0.242

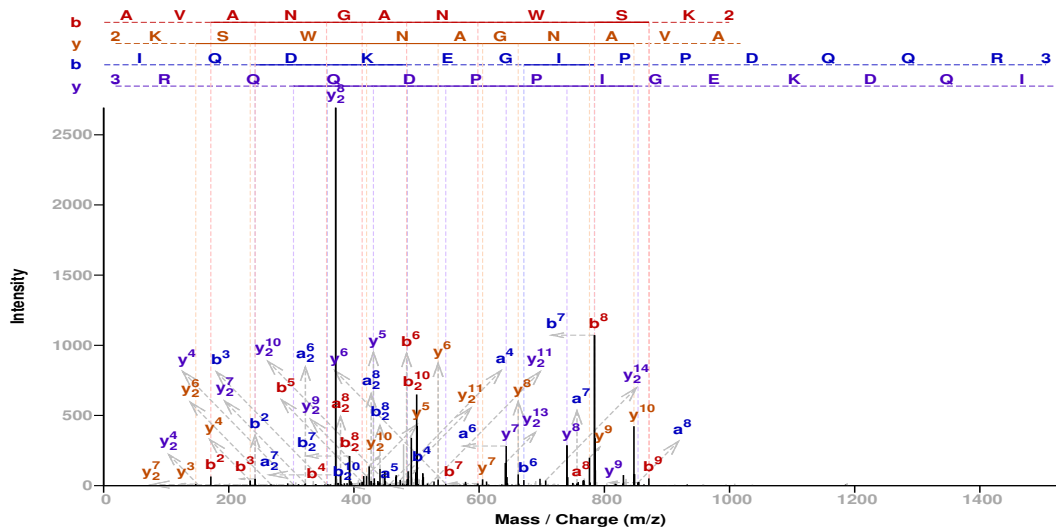

yeast5.Scan\_Number\_2944 Precursor m/z: 408.891 cosine: 0.794  $\alpha$ : 0.242

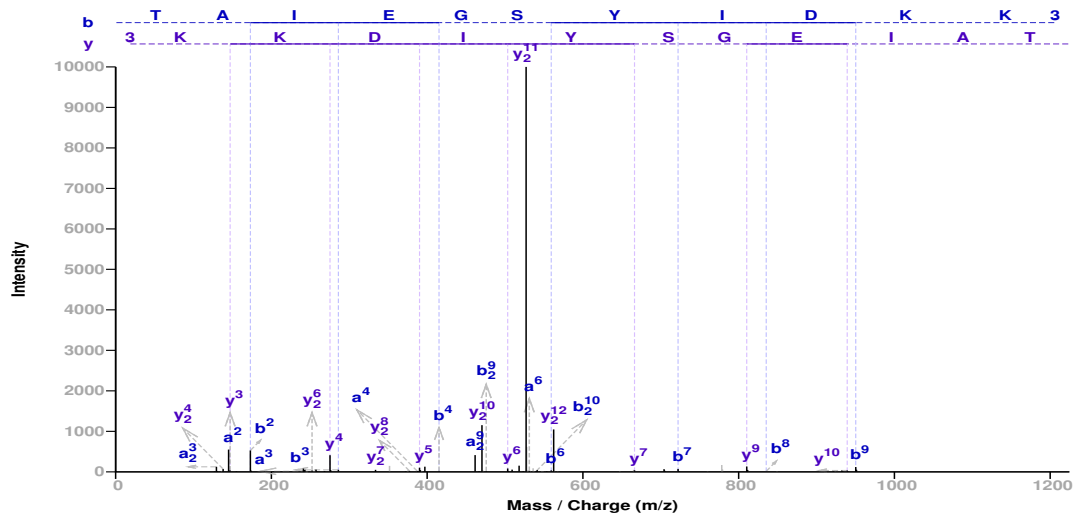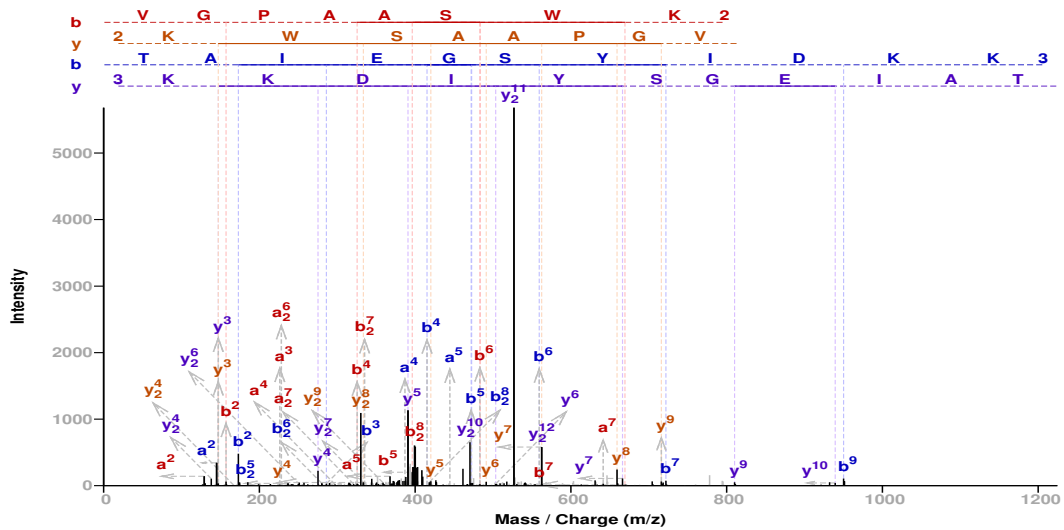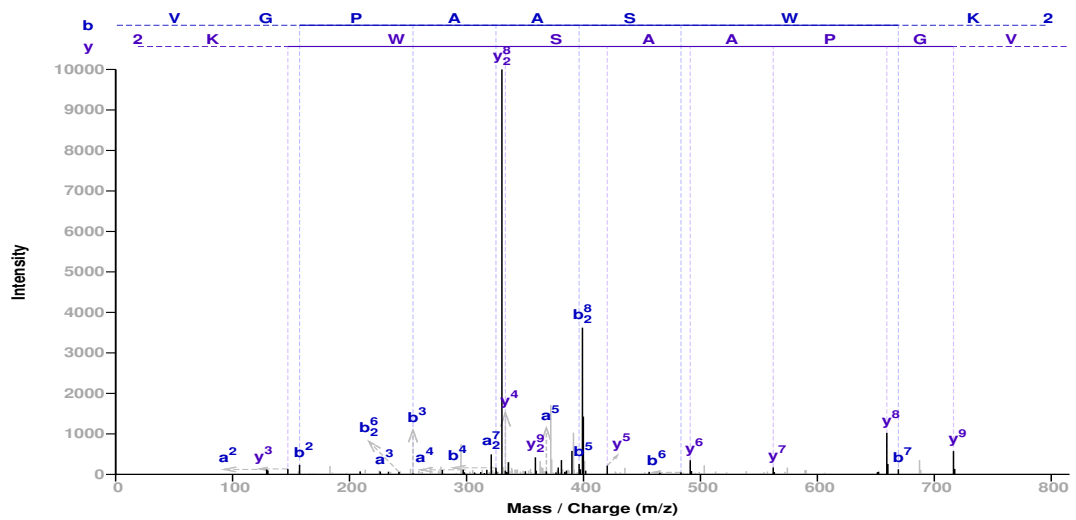

yeast5.Scan\_Number\_7080 Precursor m/z: 687.692 cosine: 0.759  $\alpha$ : 0.241

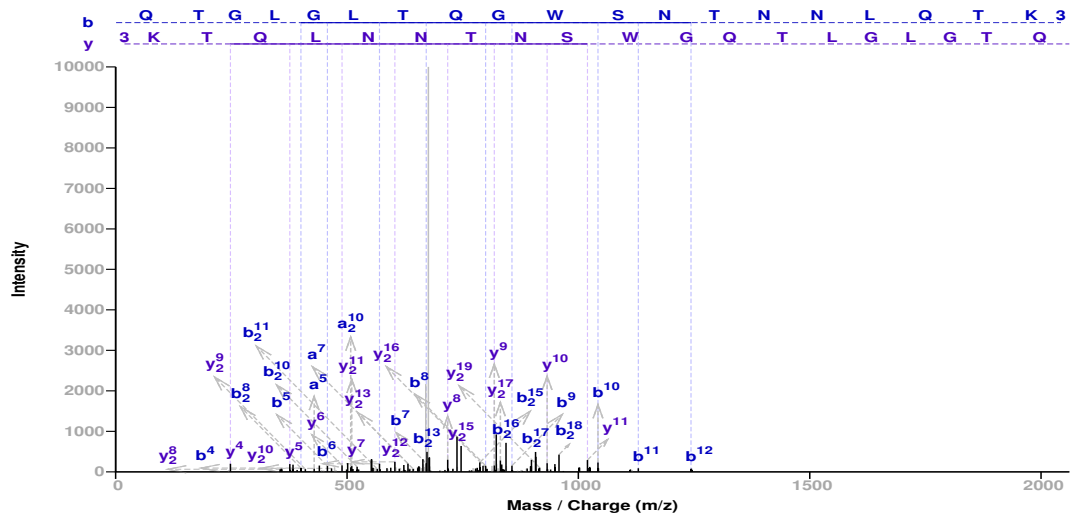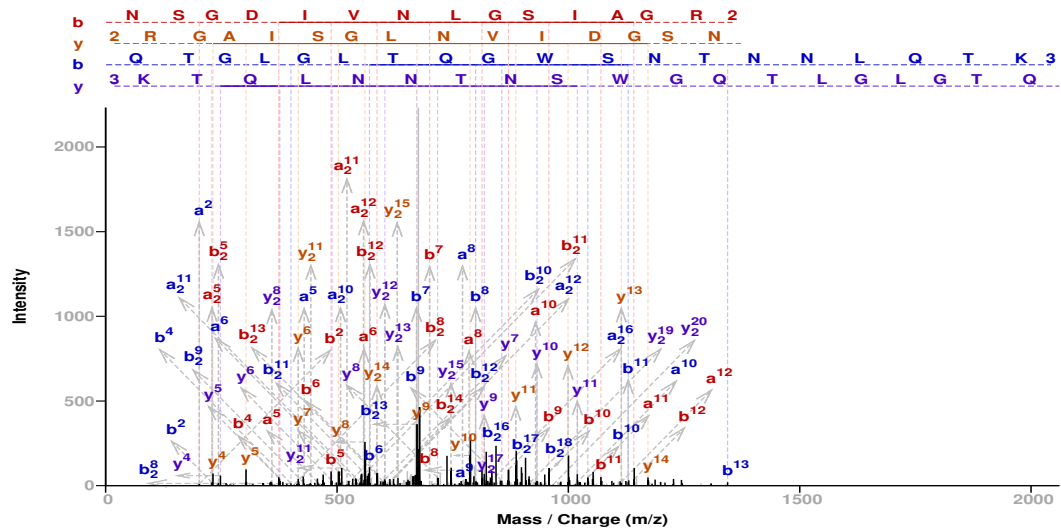







yeast5\_Scan\_Number\_4886 Precursor m/z: 610.336 cosine: 0.750  $\alpha$ : 0.236

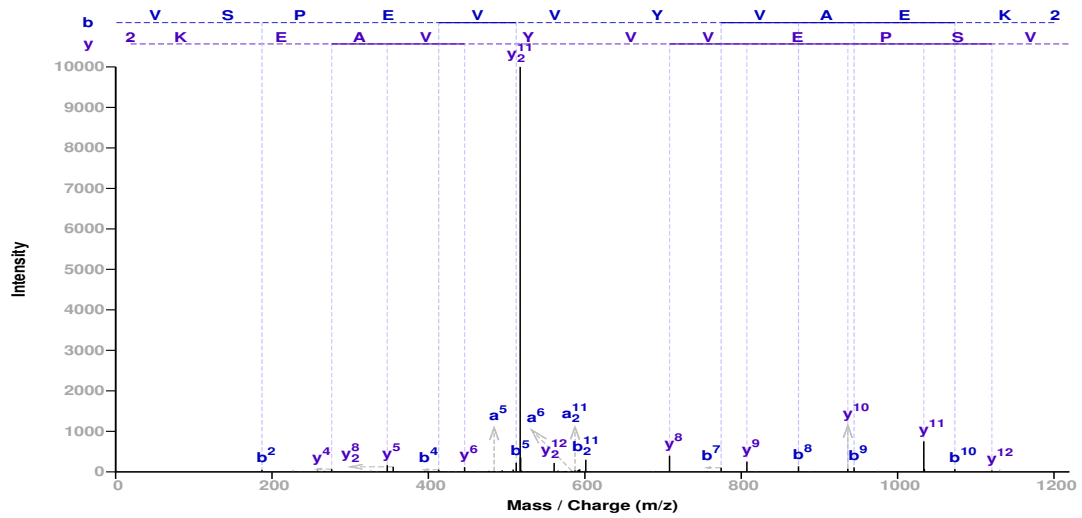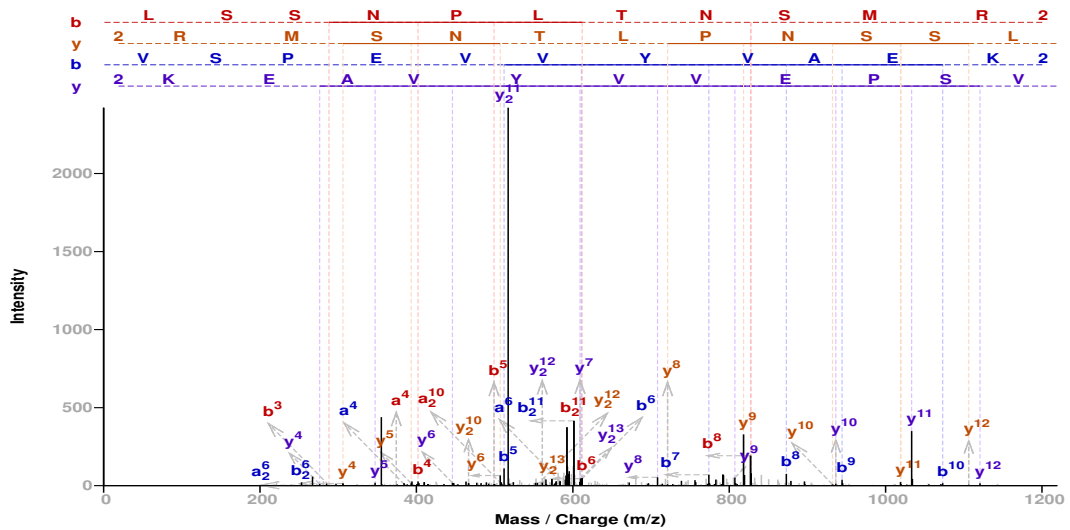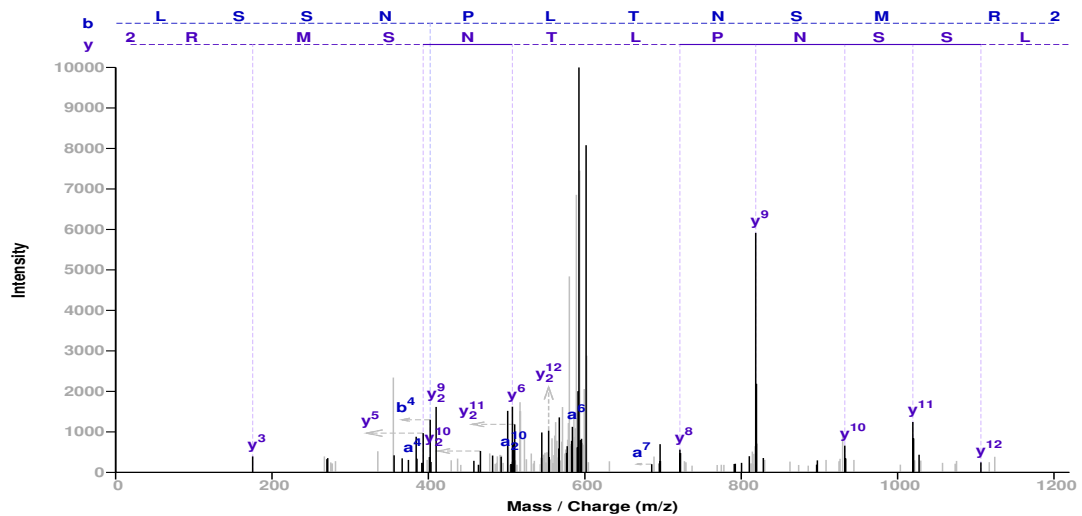

yeast5\_Scan\_Number\_7782 Precursor m/z: 651.369 cosine: 0.888  $\alpha$ : 0.234

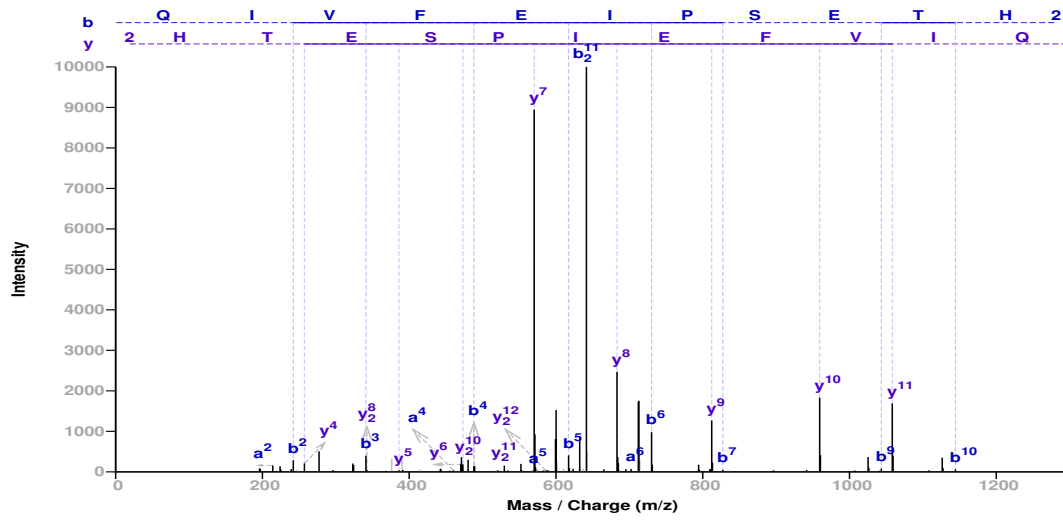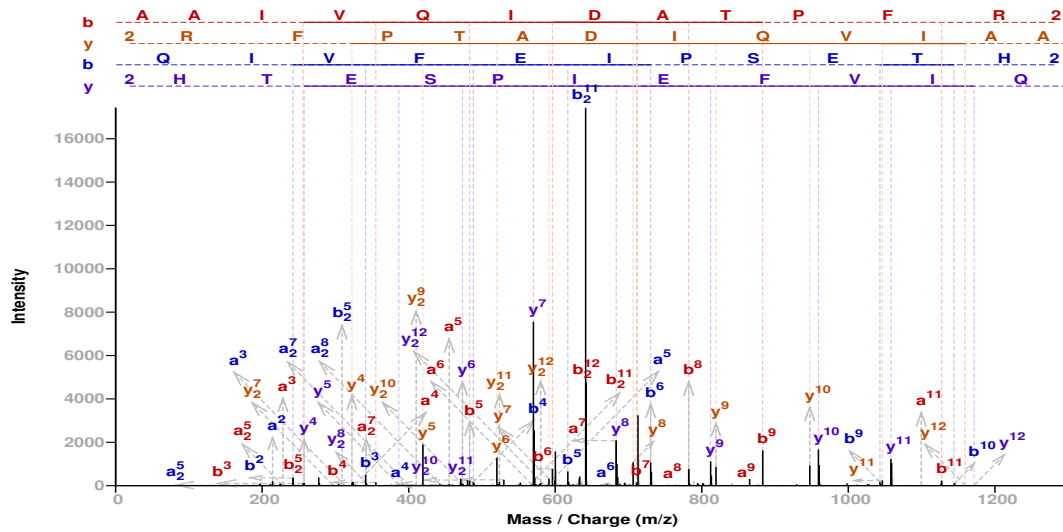

yeast5.Scan\_Number\_7222 Precursor m/z: 446.761 cosine: 0.909  $\alpha$ : 0.221

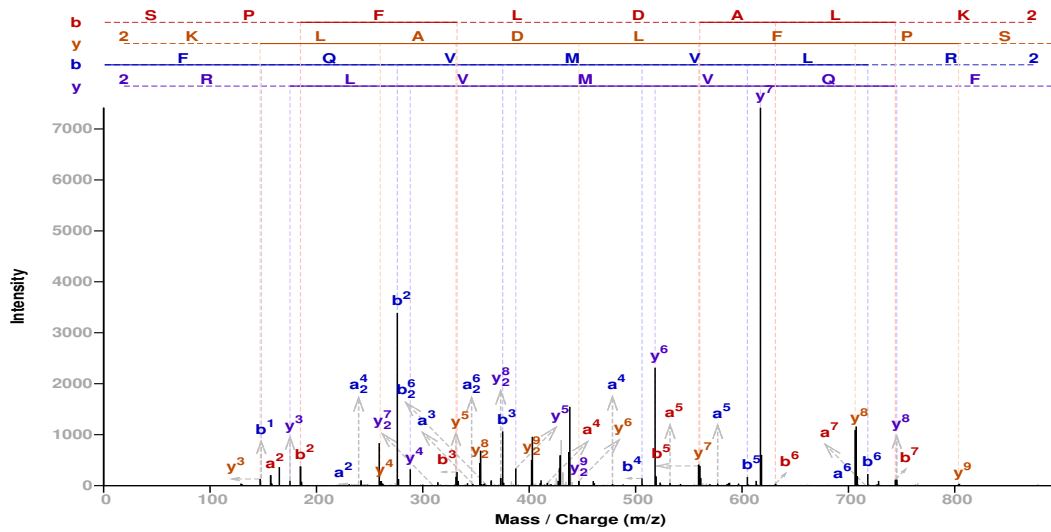

yeast5.Scan\_Number\_4576 Precursor m/z: 499.616 cosine: 0.856  $\alpha$ : 0.219

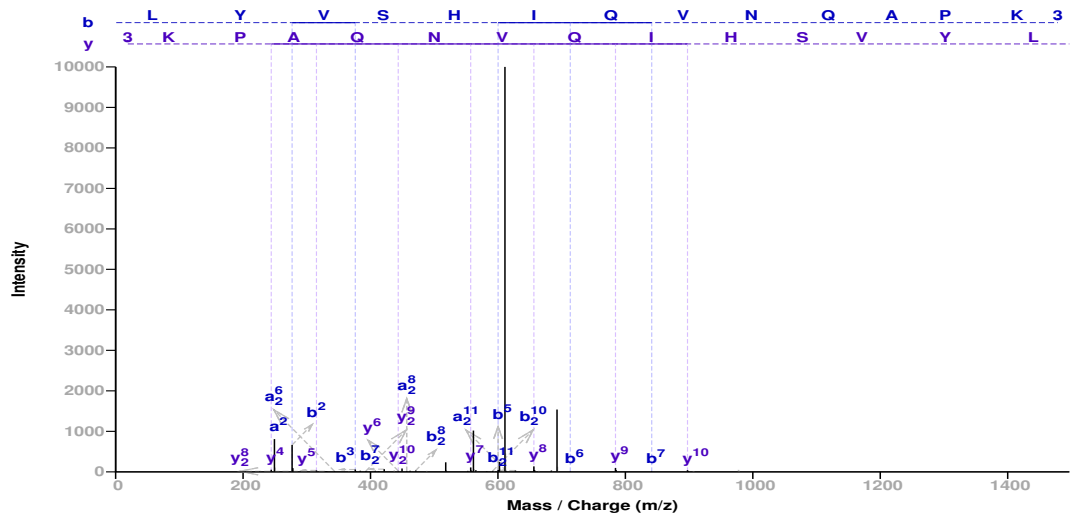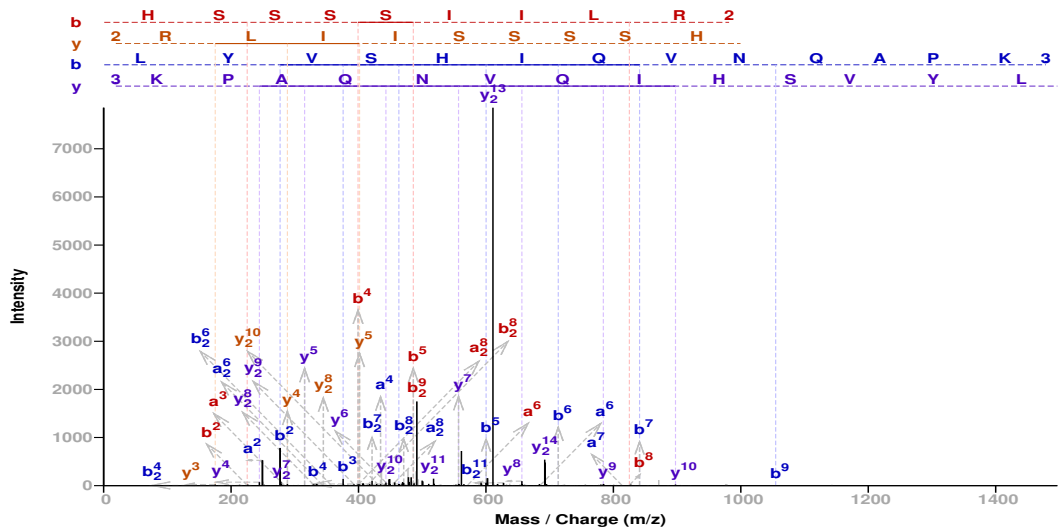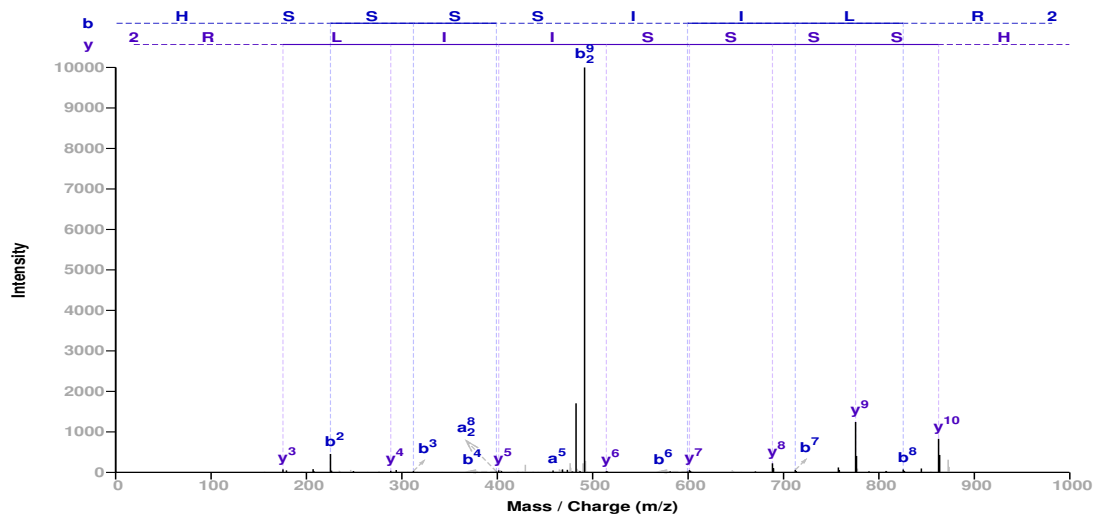

yeast5.Scan\_Number\_3341 Precursor m/z: 519.764 cosine: 0.757  $\alpha$ : 0.211

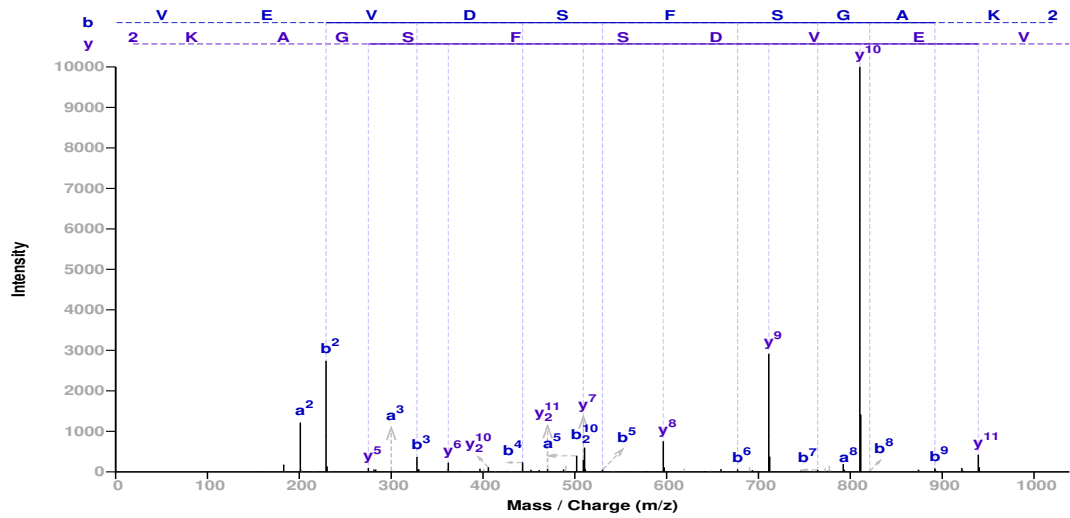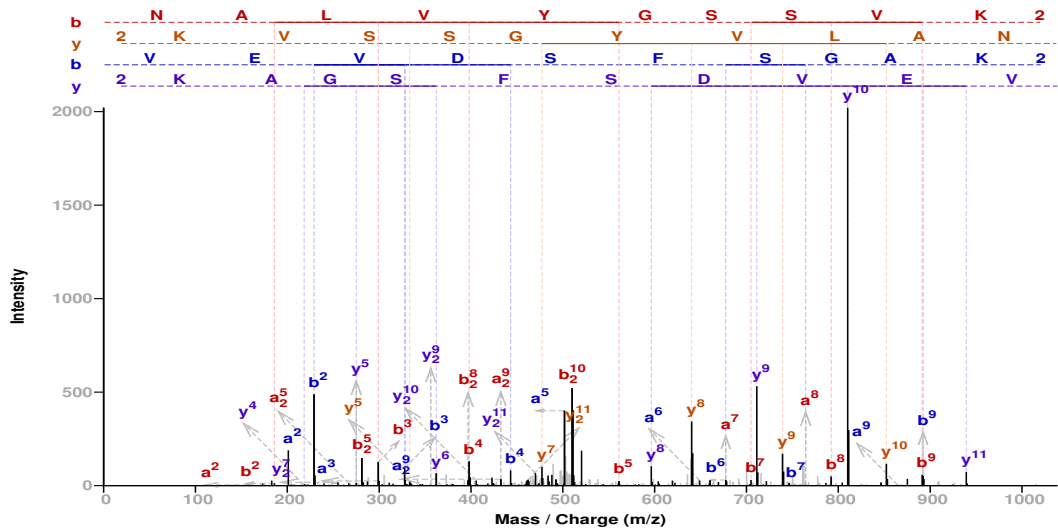

yeast5\_Scan\_Number\_3233 Precursor m/z: 343.237 cosine: 0.933  $\alpha$ : 0.199

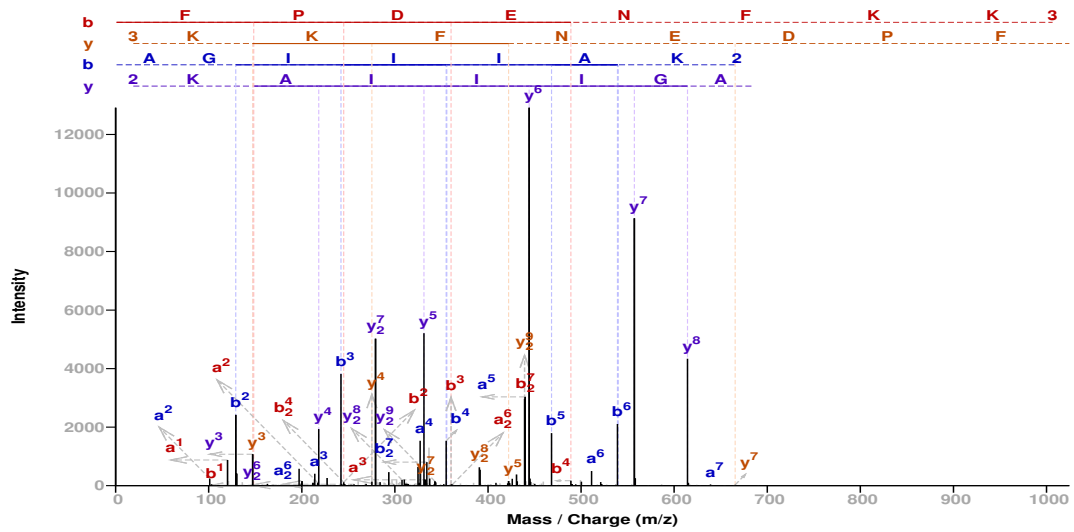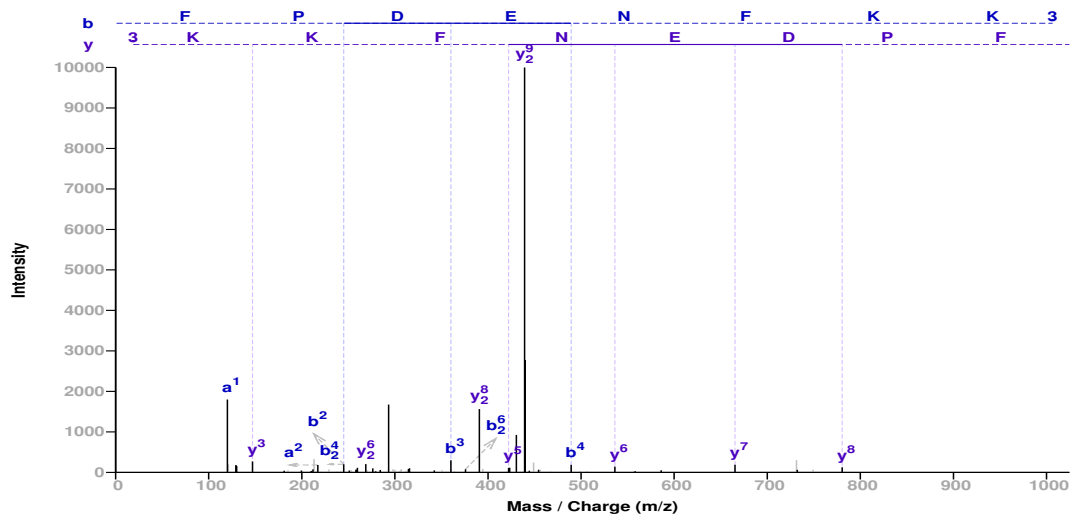



yeast5\_Scan\_Number\_3700 Precursor m/z: 633.353 cosine: 0.786  $\alpha$ : 0.188

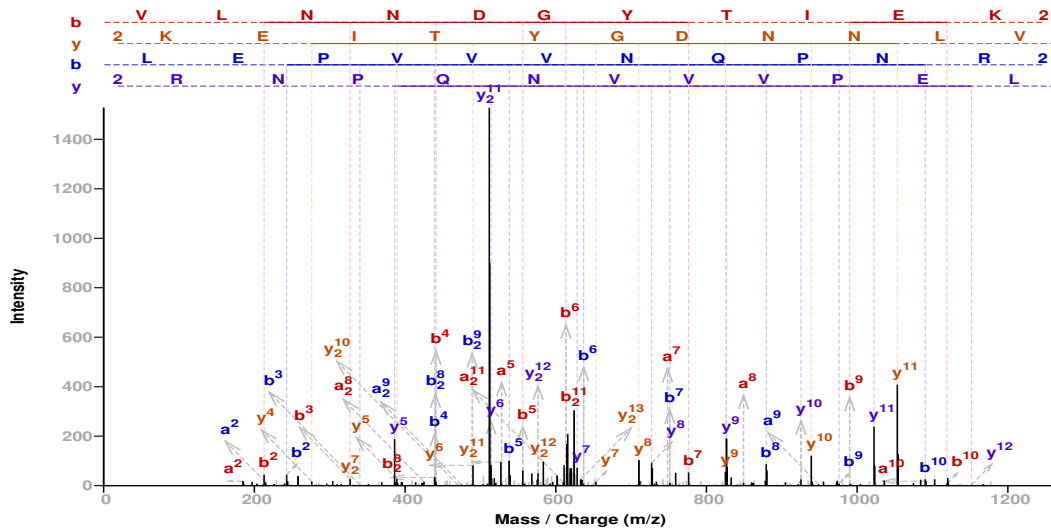

yeast5\_Scan\_Number\_6259 Precursor m/z: 813.370 cosine: 0.802  $\alpha$ : 0.180

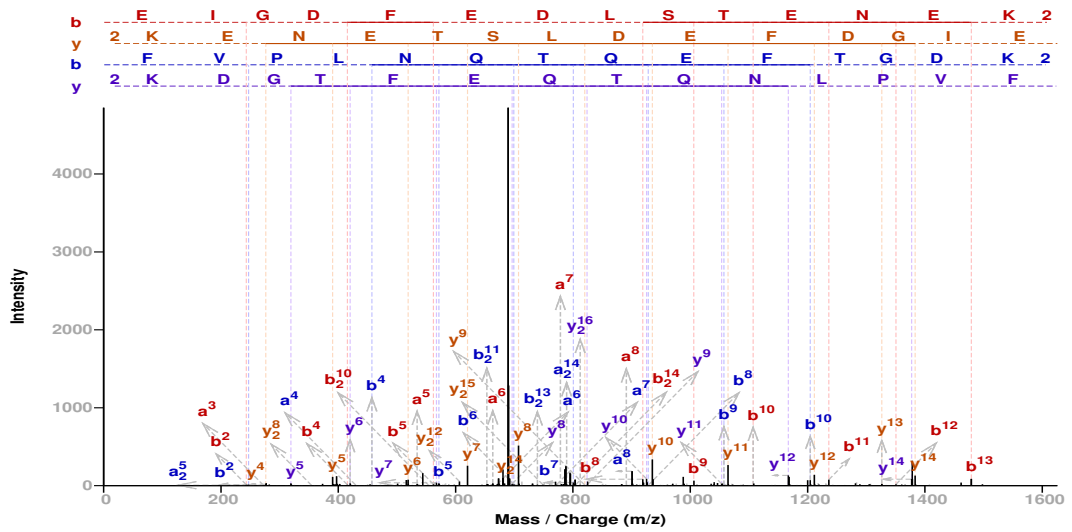

yeast5.Scan\_Number\_4055 Precursor m/z: 412.880 cosine: 0.953  $\alpha$ : 0.179

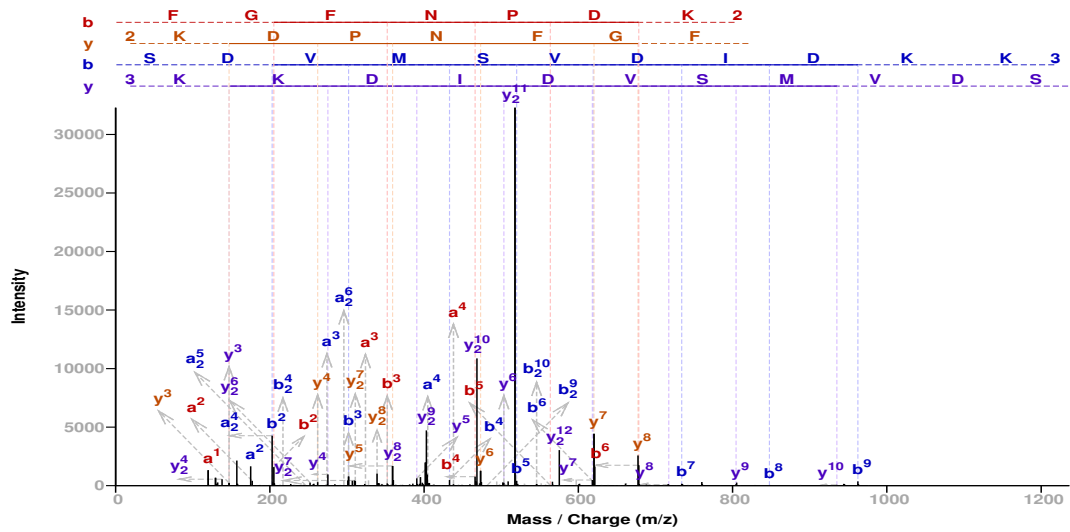

yeast5.Scan\_Number\_5196 Precursor m/z: 466.755 cosine: 0.856  $\alpha$ : 0.177

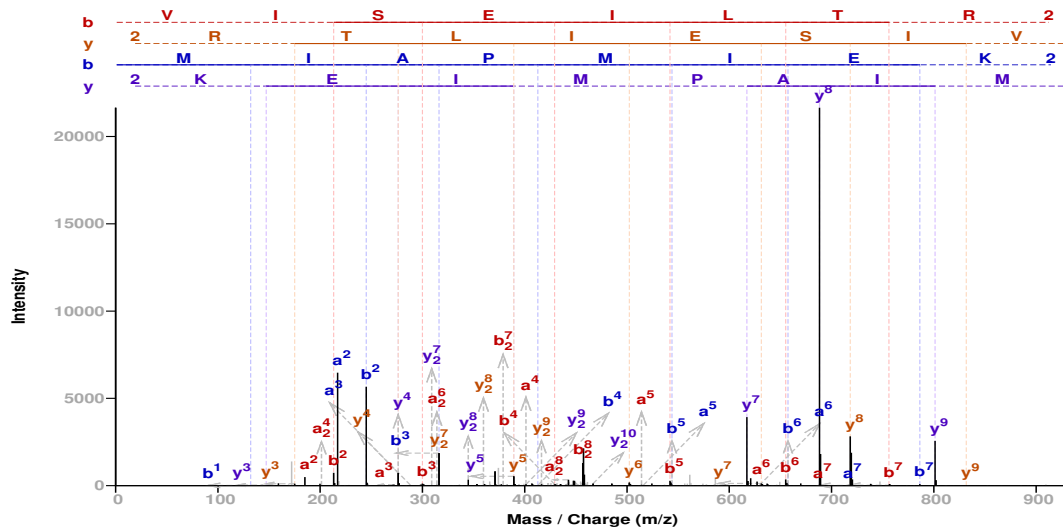



yeast5\_Scan\_Number\_3489 Precursor m/z: 511.918 cosine: 0.779  $\alpha$ : 0.169

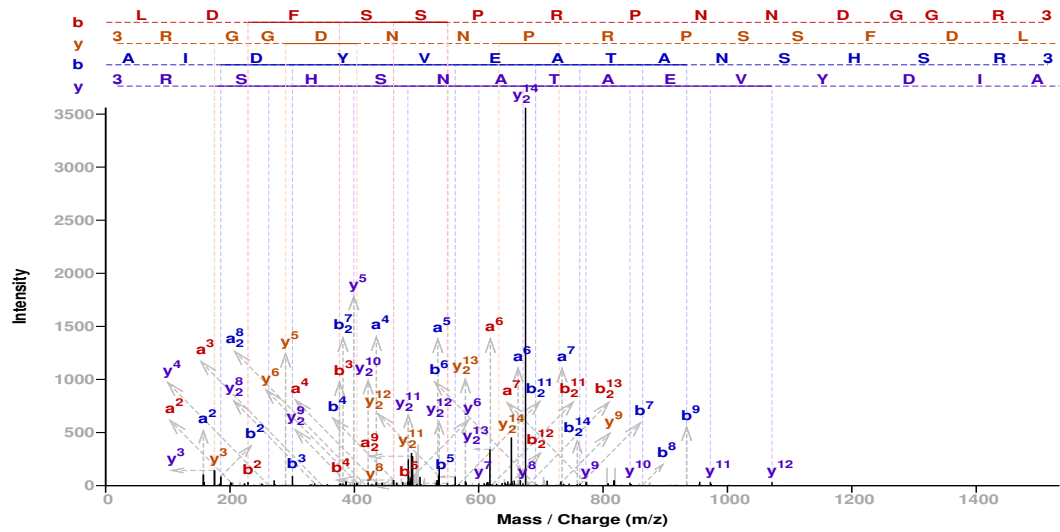

yeast5\_Scan\_Number\_6449 Precursor m/z: 658.028 cosine: 0.853  $\alpha$ : 0.164

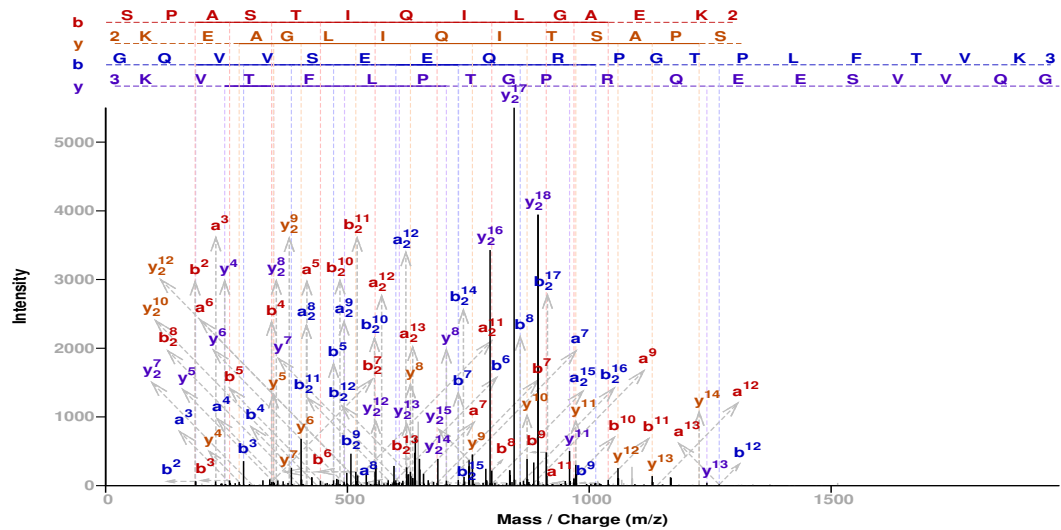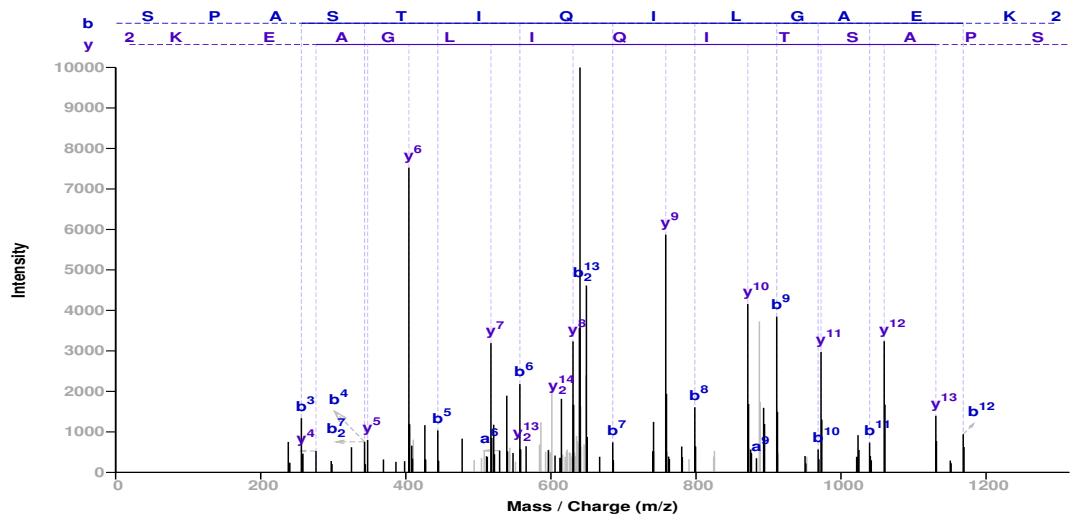





yeast5\_Scan\_Number\_6465 Precursor m/z: 447.743 cosine: 0.866  $\alpha$ : 0.153

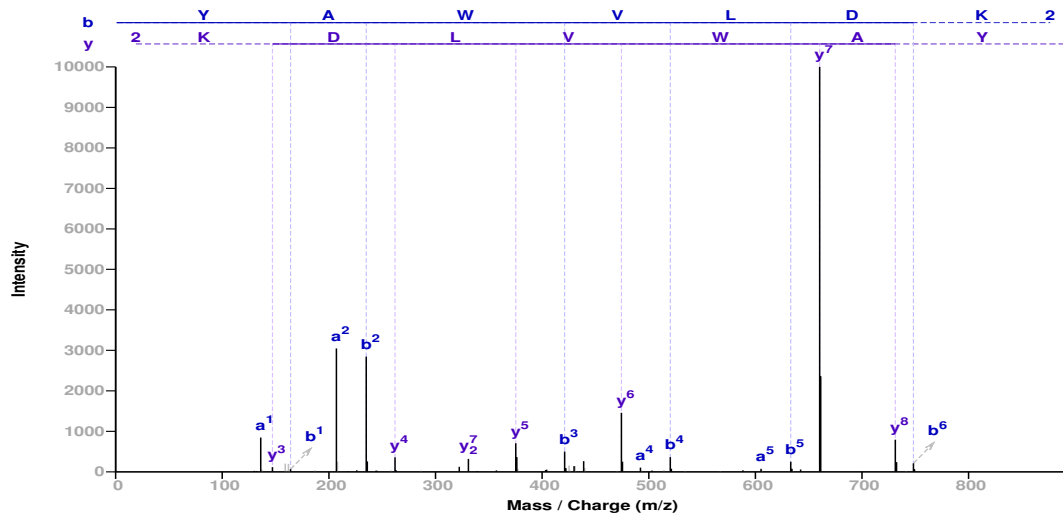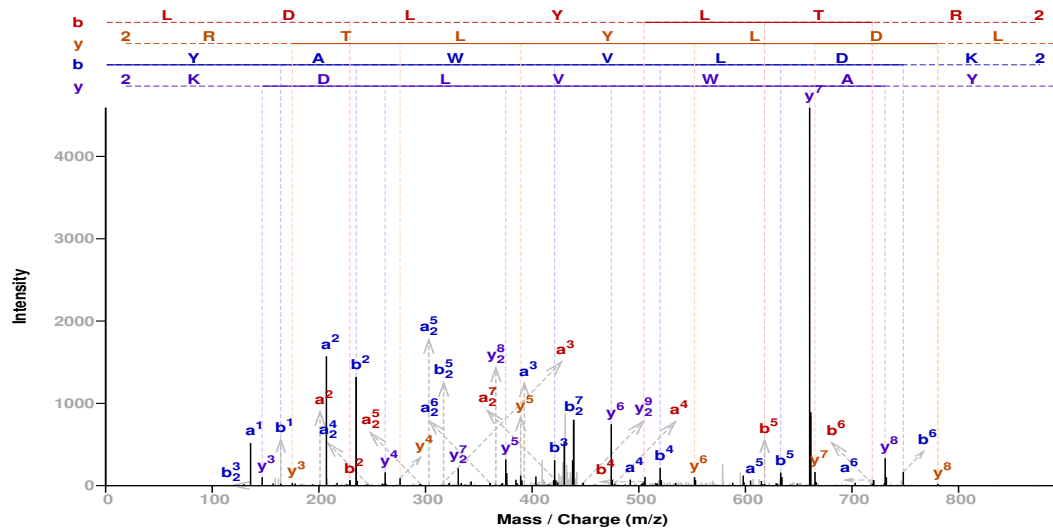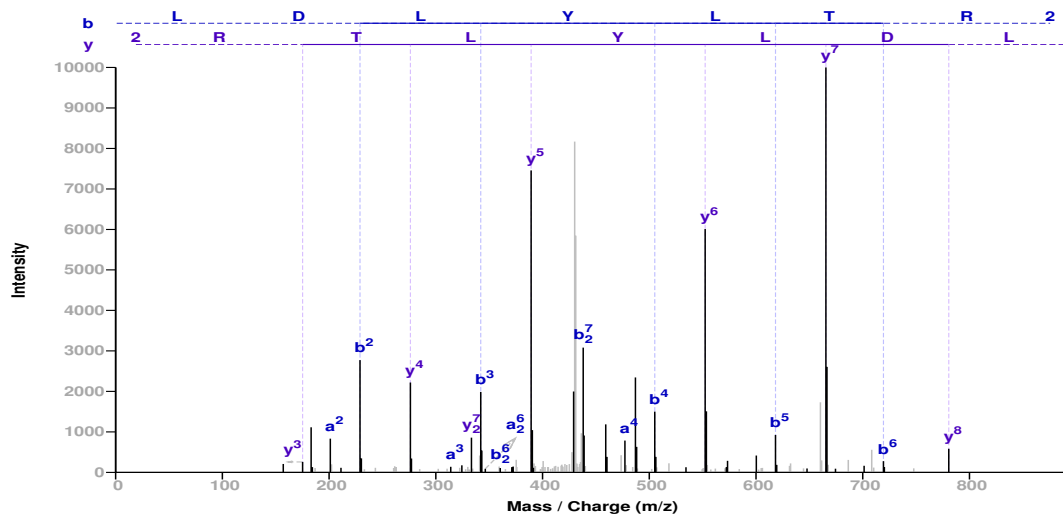

yeast5.Scan\_Number\_965 Precursor m/z: 552.297 cosine: 0.794  $\alpha$ : 0.122

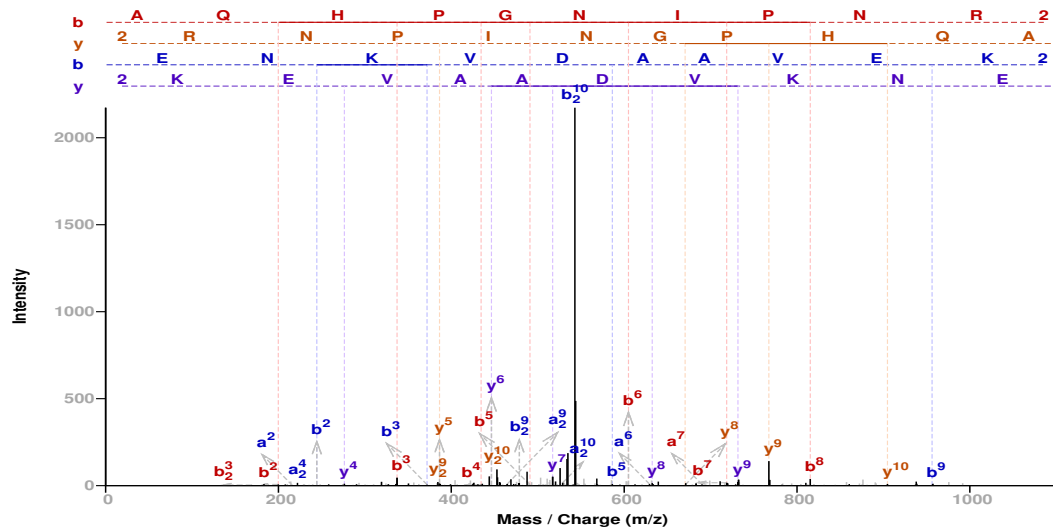

Supplement: supp_M000136-MCP201_supp_spec_plots_yeast_data.pdf [file supp_M000136-MCP201_supp_spec_plots_yeast_data.pdf]
